# Supplementary material for: Analysis of CDPK1 targets identifies a trafficking adaptor complex that regulates microneme exocytosis in Toxoplasma
Source: eLife journal article supplement (doi:10.7554/elife.85654), 2023-03-16
Supplement: supp12 [file 2022_07_17_ThioP_GOterm_HypeR_results.xlsx]

## Sheet:  
label

## Sheet: versioning
hypeR
