# Supplementary material for: Analysis of CDPK1 targets identifies a trafficking adaptor complex that regulates microneme exocytosis in Toxoplasma
Source: eLife. 2023 Nov 7;12:RP85654. doi: 10.7554/eLife.85654 (PMC10629828; doi:10.7554/eLife.85654)
Supplement: Supplementary file 1. — (A) RAW peptide and abundance assignments. (B) Replicate 1 analysis with AUCdifference and p-values. (C) Replicate 2 analysis with AUCdifference and p-values. (D) Replicate 1 and 2 analysis with AUCvehicle values for CDPK1-independent phosphorylation. (E) Group assignments for zaprinast-dependent phosphopeptides. [file elife-85654-supp1.xlsx]

## Sheet: 1.1_ZAP_enriched_RAW
Checked	Confidence	Sequence	Annotated Sequence	Modifications	Modifications (all possible sites)	Qvality PEP	Qvality q-value	# Protein Groups	# Proteins	# PSMs	Master Protein Accessions	Positions in Master Proteins	Modifications in Master Proteins (all Sites)	Modifications in Master Proteins	Master Protein Descriptions	# Missed Cleavages	Theo. MH+ [Da]	Sequence Length	Abundance Ratio: (IAA, 9) / (IAA, 0)	Abundance Ratio: (IAA, 30) / (IAA, 0)	Abundance Ratio: (IAA, 300) / (IAA, 0)	Abundance Ratio: (IAA, 0) / (PBS, 0)	Abundance Ratio: (IAA, 9) / (PBS, 0)	Abundance Ratio: (IAA, 30) / (PBS, 0)	Abundance Ratio: (IAA, 300) / (PBS, 0)	Abundance Ratio: (PBS, 9) / (PBS, 0)	Abundance Ratio: (PBS, 30) / (PBS, 0)	Abundance Ratio: (PBS, 300) / (PBS, 0)	Abundance Ratio (log2): (IAA, 9) / (IAA, 0)	Abundance Ratio (log2): (IAA, 30) / (IAA, 0)	Abundance Ratio (log2): (IAA, 300) / (IAA, 0)	Abundance Ratio (log2): (IAA, 0) / (PBS, 0)	Abundance Ratio (log2): (IAA, 9) / (PBS, 0)	Abundance Ratio (log2): (IAA, 30) / (PBS, 0)	Abundance Ratio (log2): (IAA, 300) / (PBS, 0)	Abundance Ratio (log2): (PBS, 9) / (PBS, 0)	Abundance Ratio (log2): (PBS, 30) / (PBS, 0)	Abundance Ratio (log2): (PBS, 300) / (PBS, 0)	Abundance Ratio P-Value: (IAA, 9) / (IAA, 0)	Abundance Ratio P-Value: (IAA, 30) / (IAA, 0)	Abundance Ratio P-Value: (IAA, 300) / (IAA, 0)	Abundance Ratio P-Value: (IAA, 0) / (PBS, 0)	Abundance Ratio P-Value: (IAA, 9) / (PBS, 0)	Abundance Ratio P-Value: (IAA, 30) / (PBS, 0)	Abundance Ratio P-Value: (IAA, 300) / (PBS, 0)	Abundance Ratio P-Value: (PBS, 9) / (PBS, 0)	Abundance Ratio P-Value: (PBS, 30) / (PBS, 0)	Abundance Ratio P-Value: (PBS, 300) / (PBS, 0)	Abundance Ratio Adj. P-Value: (IAA, 9) / (IAA, 0)
FALSE	High	AAAAASHEPESDILDPSDPR	[R].AAAAASHEPESDILDPSDPR.[A]	1xTMTpro [N-Term]; 1xPhospho [S11(100)]	1xTMTpro [N-Term]; 1xPhospho [S6(0); S11(100); S17(0)]	0.000120488	5.34993e-05	1	1	1	TGGT1_270780-t26_1-p1	TGGT1_270780-t26_1-p1 [39-58]	TGGT1_270780-t26_1-p1 1xPhospho [S44(0); S49(100); S55(0)]	TGGT1_270780-t26_1-p1 1xPhospho [S49(100)]	transcript=TGGT1_270780-t26_1 | gene=TGGT1_270780 | organism=Toxoplasma_gondii_GT1 | gene_product=DNA-directed RNA polymerase II RPB6 [Source:UniProtKB/TrEMBL;Acc:A0A125YFP3] | transcript_product=DNA-directed RNA polymerase II RPB6 | location=TGGT1_chrVIII:4994703-4995494(+) | protein_length=146 | sequence_SO=chromosome | SO=protein_coding_gene | is_pseudo=false	0	2433.13	20
FALSE	High	IVEEEDSAGDEGEAGEDRKSDADASFGPSALR	[R].IVEEEDSAGDEGEAGEDRKSDADASFGPSALR.[R]	1xTMTpro [K19]; 1xTMTpro [N-Term]; 1xPhospho [S]	1xTMTpro [K19]; 1xTMTpro [N-Term]; 1xPhospho [S7(50); S20(50); S25(0); S29(0)]	1.5222e-06	5.34993e-05	1	1	1	TGGT1_257560-t26_1-p1	TGGT1_257560-t26_1-p1 [39-70]			transcript=TGGT1_257560-t26_1 | gene=TGGT1_257560 | organism=Toxoplasma_gondii_GT1 | gene_product=WD_REPEATS_REGION domain-containing protein [Source:UniProtKB/TrEMBL;Acc:S7UZF8] | transcript_product=WD domain, G-beta repeat-containing protein | location=TGGT1_chrVIIb:3904702-3908262(+) | protein_length=1017 | sequence_SO=chromosome | SO=protein_coding_gene | is_pseudo=false	2	3997.84	32
FALSE	High	IVEEEDSAGDEGEAGEDRKSDADASFGPSALR	[R].IVEEEDSAGDEGEAGEDRKSDADASFGPSALR.[R]	1xTMTpro [K19]; 1xTMTpro [N-Term]; 2xPhospho [S7(100); S20(100)]	1xTMTpro [K19]; 1xTMTpro [N-Term]; 2xPhospho [S7(100); S20(100); S25(0); S29(0)]	7.74226e-15	5.34993e-05	1	1	3	TGGT1_257560-t26_1-p1	TGGT1_257560-t26_1-p1 [39-70]	TGGT1_257560-t26_1-p1 2xPhospho [S45(100); S58(100); S63(0); S67(0)]	TGGT1_257560-t26_1-p1 2xPhospho [S45(100); S58(100)]	transcript=TGGT1_257560-t26_1 | gene=TGGT1_257560 | organism=Toxoplasma_gondii_GT1 | gene_product=WD_REPEATS_REGION domain-containing protein [Source:UniProtKB/TrEMBL;Acc:S7UZF8] | transcript_product=WD domain, G-beta repeat-containing protein | location=TGGT1_chrVIIb:3904702-3908262(+) | protein_length=1017 | sequence_SO=chromosome | SO=protein_coding_gene | is_pseudo=false	2	4077.81	32	1.185	0.935	1.099	0.901	1.068	0.843	0.99	0.961	0.782	0.843	0.25	-0.1	0.14	-0.15	0.09	-0.25	-0.01	-0.06	-0.36	-0.25	0.134552	0.513798	0.123233	0.157981	0.487733	0.15753	0.86122	0.806155	0.0138071	0.341436	0.8946
FALSE	High	LVEEEVQHSAGDSEEENSEEEADDPSLFR	[R].LVEEEVQHSAGDSEEENSEEEADDPSLFR.[Q]	1xTMTpro [N-Term]; 2xPhospho [S13(100); S18(100)]	1xTMTpro [N-Term]; 2xPhospho [S9(0); S13(100); S18(100); S26(0)]	3.11281e-13	5.34993e-05	1	1	2	TGGT1_263440-t26_1-p1	TGGT1_263440-t26_1-p1 [404-432]	TGGT1_263440-t26_1-p1 2xPhospho [S412(0); S416(100); S421(100); S429(0)]	TGGT1_263440-t26_1-p1 2xPhospho [S416(100); S421(100)]	transcript=TGGT1_263440-t26_1 | gene=TGGT1_263440 | organism=Toxoplasma_gondii_GT1 | gene_product=hypothetical protein | transcript_product=hypothetical protein | location=TGGT1_chrVIIb:523665-529194(-) | protein_length=600 | sequence_SO=chromosome | SO=protein_coding_gene | is_pseudo=false	0	3740.53	29
FALSE	High	LVEEEVQHSAGDSEEENSEEEADDPSLFR	[R].LVEEEVQHSAGDSEEENSEEEADDPSLFR.[Q]	1xTMTpro [N-Term]; 3xPhospho [S9(100); S13(100); S18(100)]	1xTMTpro [N-Term]; 3xPhospho [S9(100); S13(100); S18(100); S26(0)]	5.27533e-10	5.34993e-05	1	1	2	TGGT1_263440-t26_1-p1	TGGT1_263440-t26_1-p1 [404-432]	TGGT1_263440-t26_1-p1 3xPhospho [S412(100); S416(100); S421(100); S429(0)]	TGGT1_263440-t26_1-p1 3xPhospho [S412(100); S416(100); S421(100)]	transcript=TGGT1_263440-t26_1 | gene=TGGT1_263440 | organism=Toxoplasma_gondii_GT1 | gene_product=hypothetical protein | transcript_product=hypothetical protein | location=TGGT1_chrVIIb:523665-529194(-) | protein_length=600 | sequence_SO=chromosome | SO=protein_coding_gene | is_pseudo=false	0	3820.5	29
FALSE	High	LVEEGVQR	[K].LVEEGVQR.[F]	1xTMTpro [N-Term]	1xTMTpro [N-Term]	0.000340809	5.34993e-05	1	1	2	TGGT1_291890-t26_1-p1	TGGT1_291890-t26_1-p1 [134-141]			transcript=TGGT1_291890-t26_1 | gene=TGGT1_291890 | organism=Toxoplasma_gondii_GT1 | gene_product=TgMIC1 domain-containing protein [Source:UniProtKB/TrEMBL;Acc:S7VXI3] | transcript_product=microneme protein MIC1 | location=TGGT1_chrIX:4200849-4203191(-) | protein_length=456 | sequence_SO=chromosome | SO=protein_coding_gene | is_pseudo=false	0	1233.71	8	1.149	1.078	0.958	1.026	1.178	1.106	0.982	0.877	0.993	0.908	0.2	0.11	-0.06	0.04	0.24	0.15	-0.03	-0.19	-0.01	-0.14	0.512828	0.798305	0.889044	0.623486	0.367401	0.693158	0.945491	0.531539	0.82422	0.550261	0.925814
FALSE	High	IVEESEIIKEDDNNWPAPDR	[R].IVEESEIIKEDDNNWPAPDR.[V]	1xTMTpro [K9]; 1xTMTpro [N-Term]	1xTMTpro [K9]; 1xTMTpro [N-Term]	9.00646e-15	5.34993e-05	1	1	2	TGGT1_267420-t26_1-p1	TGGT1_267420-t26_1-p1 [119-138]			transcript=TGGT1_267420-t26_1 | gene=TGGT1_267420 | organism=Toxoplasma_gondii_GT1 | gene_product=Putative mago nashi family protein 2 [Source:UniProtKB/TrEMBL;Acc:S7VW14] | transcript_product=putative mago nashi family protein 2 | location=TGGT1_chrIX:498202-500605(-) | protein_length=202 | sequence_SO=chromosome | SO=protein_coding_gene | is_pseudo=false	1	2977.54	20
FALSE	High	LVEHAGADHTYVESDCAR	[K].LVEHAGADHTYVESDCAR.[Y]	1xMethylthio [C16]; 1xTMTpro [N-Term]	1xMethylthio [C16]; 1xTMTpro [N-Term]	1.40039e-06	5.34993e-05	1	1	1	TGGT1_221522-t26_1-p1	TGGT1_221522-t26_1-p1 [30-47]	TGGT1_221522-t26_1-p1 1xMethylthio [C45]	TGGT1_221522-t26_1-p1 1xMethylthio [C45]	transcript=TGGT1_221522-t26_1 | gene=TGGT1_221522 | organism=Toxoplasma_gondii_GT1 | gene_product=Coatomer subunit delta [Source:UniProtKB/TrEMBL;Acc:S7UKG7] | transcript_product=adaptor complexes medium subunit family protein | location=TGGT1_chrII:393309-399736(+) | protein_length=571 | sequence_SO=chromosome | SO=protein_coding_gene | is_pseudo=false	0	2323.08	18
FALSE	High	LVELAHYMSVQDGA	[R].LVELAHYMSVQDGA.[-]	1xTMTpro [N-Term]	1xTMTpro [N-Term]	8.4431e-05	5.34993e-05	1	1	1	TGGT1_289690-t26_1-p1	TGGT1_289690-t26_1-p1 [476-489]			transcript=TGGT1_289690-t26_1 | gene=TGGT1_289690 | organism=Toxoplasma_gondii_GT1 | gene_product=Glyceraldehyde-3-phosphate dehydrogenase [Source:UniProtKB/TrEMBL;Acc:S7UQ54] | transcript_product=glyceraldehyde-3-phosphate dehydrogenase GAPDH1 | location=TGGT1_chrIX:3189155-3191218(-) | protein_length=489 | sequence_SO=chromosome | SO=protein_coding_gene | is_pseudo=false	0	1836.95	14
FALSE	High	LVGGTEEDAPGGEEEDQEGQEK	[R].LVGGTEEDAPGGEEEDQEGQEK.[L]	1xTMTpro [K22]; 1xTMTpro [N-Term]	1xTMTpro [K22]; 1xTMTpro [N-Term]	5.68319e-05	5.34993e-05	1	1	1	TGGT1_217220-t26_1-p1	TGGT1_217220-t26_1-p1 [14-35]			transcript=TGGT1_217220-t26_1 | gene=TGGT1_217220 | organism=Toxoplasma_gondii_GT1 | gene_product=E3 ubiquitin protein ligase [Source:UniProtKB/TrEMBL;Acc:S7VUP6] | transcript_product=zinc finger, C3HC4 type (RING finger) domain-containing protein | location=TGGT1_chrXI:5563422-5578268(-) | protein_length=1027 | sequence_SO=chromosome | SO=protein_coding_gene | is_pseudo=false	0	2911.39	22
FALSE	High	LVGMTHDIDSDDEFAQANAR	[R].LVGMTHDIDSDDEFAQANAR.[T]	1xTMTpro [N-Term]; 1xPhospho [S10(100)]	1xTMTpro [N-Term]; 1xPhospho [T5(0); S10(100)]	5.00986e-10	5.34993e-05	1	1	6	TGGT1_203620-t26_1-p1	TGGT1_203620-t26_1-p1 [409-428]	TGGT1_203620-t26_1-p1 1xPhospho [T413(0); S418(100)]	TGGT1_203620-t26_1-p1 1xPhospho [S418(100)]	transcript=TGGT1_203620-t26_1 | gene=TGGT1_203620 | organism=Toxoplasma_gondii_GT1 | gene_product=MRP-S28 domain-containing protein [Source:UniProtKB/TrEMBL;Acc:S7W424] | transcript_product=hypothetical protein | location=TGGT1_chrVIIa:2294935-2299477(+) | protein_length=584 | sequence_SO=chromosome | SO=protein_coding_gene | is_pseudo=false	0	2589.16	20	1.007	0.962	0.949	0.992	0.999	0.955	0.941	0.77	0.789	0.841	0.01	-0.06	-0.08	-0.01	0	-0.07	-0.09	-0.38	-0.34	-0.25	0.974743	0.304294	0.0881492	0.903989	0.995396	0.369649	0.394958	0.112046	0.437906	0.264282	0.995188
FALSE	High	LVGMTHDIDSDDEFAQANAR	[R].LVGMTHDIDSDDEFAQANAR.[T]	1xOxidation [M4]; 1xTMTpro [N-Term]; 1xPhospho [S10(100)]	1xOxidation [M4]; 1xTMTpro [N-Term]; 1xPhospho [T5(0); S10(100)]	1.83938e-11	5.34993e-05	1	1	10	TGGT1_203620-t26_1-p1	TGGT1_203620-t26_1-p1 [409-428]	TGGT1_203620-t26_1-p1 1xPhospho [T413(0); S418(100)]	TGGT1_203620-t26_1-p1 1xPhospho [S418(100)]	transcript=TGGT1_203620-t26_1 | gene=TGGT1_203620 | organism=Toxoplasma_gondii_GT1 | gene_product=MRP-S28 domain-containing protein [Source:UniProtKB/TrEMBL;Acc:S7W424] | transcript_product=hypothetical protein | location=TGGT1_chrVIIa:2294935-2299477(+) | protein_length=584 | sequence_SO=chromosome | SO=protein_coding_gene | is_pseudo=false	0	2605.16	20	0.936	0.722	0.886	1.107	1.036	0.799	0.981	0.927	0.797	0.795	-0.1	-0.47	-0.17	0.15	0.05	-0.32	-0.03	-0.11	-0.33	-0.33	0.631689	0.0304752	0.675933	0.736684	0.830536	0.487836	0.408333	0.411921	0.246161	0.168025	0.946445
FALSE	High	IVGTHSGSLEHVPFPGLAPGHER	[K].IVGTHSGSLEHVPFPGLAPGHER.[R]	1xTMTpro [N-Term]; 1xPhospho [S/T]	1xTMTpro [N-Term]; 1xPhospho [T4(0.2); S6(49.9); S8(49.9)]	9.05404e-10	5.34993e-05	1	1	2	TGGT1_270865-t26_1-p1	TGGT1_270865-t26_1-p1 [1701-1723]			transcript=TGGT1_270865-t26_1 | gene=TGGT1_270865 | organism=Toxoplasma_gondii_GT1 | gene_product=Putative adenylate cyclase [Source:UniProtKB/TrEMBL;Acc:S7WDA0] | transcript_product=putative adenylate cyclase | location=TGGT1_chrVIII:4921378-4938757(-) | protein_length=2040 | sequence_SO=chromosome | SO=protein_coding_gene | is_pseudo=false	0	2778.4	23
FALSE	High	IVEEEDSAGDEGEAGEDRK	[R].IVEEEDSAGDEGEAGEDRK.[S]	1xTMTpro [K19]; 1xTMTpro [N-Term]; 1xPhospho [S7(100)]	1xTMTpro [K19]; 1xTMTpro [N-Term]; 1xPhospho [S7(100)]	3.22415e-05	5.34993e-05	1	1	3	TGGT1_257560-t26_1-p1	TGGT1_257560-t26_1-p1 [39-57]	TGGT1_257560-t26_1-p1 1xPhospho [S45(100)]	TGGT1_257560-t26_1-p1 1xPhospho [S45(100)]	transcript=TGGT1_257560-t26_1 | gene=TGGT1_257560 | organism=Toxoplasma_gondii_GT1 | gene_product=WD_REPEATS_REGION domain-containing protein [Source:UniProtKB/TrEMBL;Acc:S7UZF8] | transcript_product=WD domain, G-beta repeat-containing protein | location=TGGT1_chrVIIb:3904702-3908262(+) | protein_length=1017 | sequence_SO=chromosome | SO=protein_coding_gene | is_pseudo=false	1	2723.25	19
FALSE	High	LVHDSLEDLQMTR	[K].LVHDSLEDLQMTR.[Y]	1xTMTpro [N-Term]; 1xPhospho [S5(100)]	1xTMTpro [N-Term]; 1xPhospho [S5(100); T12(0)]	3.36793e-05	5.34993e-05	1	1	3	Q9H7F0	Q9H7F0 [813-825]	Q9H7F0 1xPhospho [S817(100); T824(0)]	Q9H7F0 1xPhospho [S817(100)]	Probable cation-transporting ATPase 13A3 OS=Homo sapiens (Human) OX=9606 GN=ATP13A3 PE=1 SV=4	0	1940.95	13
FALSE	High	LVLLSLASPSAEMPQTVDSPR	[R].LVLLSLASPSAEMPQTVDSPR.[Q]	1xOxidation [M13]; 1xTMTpro [N-Term]; 1xPhospho [S19(100)]	1xOxidation [M13]; 1xTMTpro [N-Term]; 1xPhospho [S5(0); S8(0); S10(0); T16(0); S19(100)]	9.41371e-07	5.34993e-05	1	1	2	TGGT1_224928-t26_1-p1	TGGT1_224928-t26_1-p1 [903-923]	TGGT1_224928-t26_1-p1 1xPhospho [S907(0); S910(0); S912(0); T918(0); S921(100)]	TGGT1_224928-t26_1-p1 1xPhospho [S921(100)]	transcript=TGGT1_224928-t26_1 | gene=TGGT1_224928 | organism=Toxoplasma_gondii_GT1 | gene_product=JmjC domain-containing protein [Source:UniProtKB/TrEMBL;Acc:S7UW62] | transcript_product=histone lysine demethylase JMJD4 | location=TGGT1_chrX:2582720-2588662(-) | protein_length=1661 | sequence_SO=chromosome | SO=protein_coding_gene | is_pseudo=false	0	2611.34	21
FALSE	High	LVLPGELAK	[R].LVLPGELAK.[H]	1xTMTpro [K9]; 1xTMTpro [N-Term]	1xTMTpro [K9]; 1xTMTpro [N-Term]	0.000233349	5.34993e-05	2	2	1	TGGT1_305160-t26_1-p1; TGGT1_251870-t26_1-p1	TGGT1_305160-t26_1-p1 [92-100]; TGGT1_251870-t26_1-p1 [91-99]			transcript=TGGT1_305160-t26_1 | gene=TGGT1_305160 | organism=Toxoplasma_gondii_GT1 | gene_product=Histone H2B [Source:UniProtKB/TrEMBL;Acc:A0A125YHE1] | transcript_product=histone H2Ba | location=TGGT1_chrIX:5039074-5039424(+) | protein_length=116 | sequence_SO=chromosome | SO=protein_coding_gene | is_pseudo=false transcript=TGGT1_251870-t26_1 | gene=TGGT1_251870 | organism=Toxoplasma_gondii_GT1 …	0	1548	9	0.923	1.035	1.129	1.053	0.972	1.09	1.188	1.015	0.923	1.078	-0.12	0.05	0.17	0.07	-0.04	0.12	0.25	0.02	-0.11	0.11	0.744484	0.775803	0.539089	0.792715	0.575855	0.37709	0.657793	0.9621	0.0868011	0.878727	0.962631
FALSE	High	LVIQNKPSTNVSVDR	[R].LVIQNKPSTNVSVDR.[Q]	1xTMTpro [K6]; 1xTMTpro [N-Term]; 1xPhospho [S8(99.7)]	1xTMTpro [K6]; 1xTMTpro [N-Term]; 1xPhospho [S8(99.7); T9(0.3); S12(0)]	0.000102883	5.34993e-05	1	1	1	TGGT1_289970-t26_1-p1	TGGT1_289970-t26_1-p1 [61-75]	TGGT1_289970-t26_1-p1 1xPhospho [S68(99.7); T69(0.3); S72(0)]	TGGT1_289970-t26_1-p1 1xPhospho [S68(99.7)]	transcript=TGGT1_289970-t26_1 | gene=TGGT1_289970 | organism=Toxoplasma_gondii_GT1 | gene_product=hypothetical protein | transcript_product=hypothetical protein | location=TGGT1_chrIX:3366173-3367777(+) | protein_length=232 | sequence_SO=chromosome | SO=protein_coding_gene | is_pseudo=false	0	2358.3	15	0.736	1.096	1.667	1.889	1.391	2.071	3.149	1.23	1.995	3.306	-0.44	0.13	0.74	0.92	0.48	1.05	1.65	0.3	1	1.72	0.356849	0.633222	0.464158	0.0297317	0.37723	0.146877	0.255136	0.26987	0.212345	0.234676	0.90924
FALSE	High	IVNDLTVHQLCK	[K].IVNDLTVHQLCK.[Q]	1xMethylthio [C11]; 1xTMTpro [K12]; 1xTMTpro [N-Term]; 1xPhospho [T6(100)]	1xMethylthio [C11]; 1xTMTpro [K12]; 1xTMTpro [N-Term]; 1xPhospho [T6(100)]	0.000326528	5.34993e-05	1	1	1	TGGT1_253900-t26_1-p1	TGGT1_253900-t26_1-p1 [458-469]	TGGT1_253900-t26_1-p1 1xMethylthio [C468]; 1xPhospho [T463(100)]	TGGT1_253900-t26_1-p1 1xMethylthio [C468]; 1xPhospho [T463(100)]	transcript=TGGT1_253900-t26_1 | gene=TGGT1_253900 | organism=Toxoplasma_gondii_GT1 | gene_product=Delta-aminolevulinic acid dehydratase [Source:UniProtKB/TrEMBL;Acc:S7ULV4] | transcript_product=parasite porphobilinogen synthase PBGS | location=TGGT1_chrIII:1265521-1273167(-) | protein_length=658 | sequence_SO=chromosome | SO=protein_coding_gene | is_pseudo=false	0	2117.11	12
FALSE	High	LVNFNNAIEAYK	[K].LVNFNNAIEAYK.[K]	1xTMTpro [K12]; 1xTMTpro [N-Term]	1xTMTpro [K12]; 1xTMTpro [N-Term]	1.39484e-06	5.34993e-05	1	1	1	TGGT1_273520-t26_1-p1	TGGT1_273520-t26_1-p1 [83-94]			transcript=TGGT1_273520-t26_1 | gene=TGGT1_273520 | organism=Toxoplasma_gondii_GT1 | gene_product=Eukaryotic translation initiation factor 3 subunit E [Source:UniProtKB/TrEMBL;Acc:A0A125YQR1] | transcript_product=PCI domain-containing protein | location=TGGT1_chrVIII:3416534-3423842(+) | protein_length=601 | sequence_SO=chromosome | SO=protein_coding_gene | is_pseudo=false	0	2004.14	12
FALSE	High	LVPELTEEQQR	[R].LVPELTEEQQR.[G]	1xTMTpro [N-Term]	1xTMTpro [N-Term]	9.43157e-05	5.34993e-05	1	1	5	TGGT1_203310-t26_1-p1	TGGT1_203310-t26_1-p1 [160-170]			transcript=TGGT1_203310-t26_1 | gene=TGGT1_203310 | organism=Toxoplasma_gondii_GT1 | gene_product=Dense granule protein GRA7 [Source:UniProtKB/TrEMBL;Acc:A0A125YVB8] | transcript_product=dense granule protein GRA7 | location=TGGT1_chrVIIa:2502941-2503651(+) | protein_length=236 | sequence_SO=chromosome | SO=protein_coding_gene | is_pseudo=false	0	1645.91	11	0.986	1.098	1.123	0.955	0.941	1.048	1.072	1.018	1	0.957	-0.02	0.13	0.17	-0.07	-0.09	0.07	0.1	0.03	0	-0.06	0.971543	0.206525	0.279256	0.743605	0.824684	0.651155	0.422112	0.826133	0.998982	0.505923	0.995188
FALSE	High	IVPENSKLSDLDAETR	[K].IVPENSKLSDLDAETR.[S]	1xTMTpro [K7]; 1xTMTpro [N-Term]; 1xPhospho [S9(100)]	1xTMTpro [K7]; 1xTMTpro [N-Term]; 1xPhospho [S6(0); S9(100); T15(0)]	0.000314054	5.34993e-05	1	1	2	TGGT1_233680-t26_1-p1	TGGT1_233680-t26_1-p1 [273-288]	TGGT1_233680-t26_1-p1 1xPhospho [S278(0); S281(100); T287(0)]	TGGT1_233680-t26_1-p1 1xPhospho [S281(100)]	transcript=TGGT1_233680-t26_1 | gene=TGGT1_233680 | organism=Toxoplasma_gondii_GT1 | gene_product=CS domain-containing protein [Source:UniProtKB/TrEMBL;Acc:S7WC45] | transcript_product=nuclear movement family protein | location=TGGT1_chrVIII:2721542-2723727(+) | protein_length=347 | sequence_SO=chromosome | SO=protein_coding_gene | is_pseudo=false	1	2475.3	16	0.849	0.877	0.862	1.057	0.897	0.927	0.91	0.834	0.905	0.851	-0.24	-0.19	-0.21	0.08	-0.16	-0.11	-0.14	-0.26	-0.14	-0.23	0.212602	0.0323302	0.235137	0.83821	0.756207	0.773364	0.786856	0.634828	0.463469	0.621702	0.900211
FALSE	High	IVQELEAGSGKDSAR	[R].IVQELEAGSGKDSAR.[D]	1xTMTpro [K11]; 1xTMTpro [N-Term]; 1xPhospho [S13(100)]	1xTMTpro [K11]; 1xTMTpro [N-Term]; 1xPhospho [S9(0); S13(100)]	6.35324e-07	5.34993e-05	1	1	3	TGGT1_263420-t26_1-p1	TGGT1_263420-t26_1-p1 [671-685]	TGGT1_263420-t26_1-p1 1xPhospho [S679(0); S683(100)]	TGGT1_263420-t26_1-p1 1xPhospho [S683(100)]	transcript=TGGT1_263420-t26_1 | gene=TGGT1_263420 | organism=Toxoplasma_gondii_GT1 | gene_product=USP domain-containing protein [Source:UniProtKB/TrEMBL;Acc:S7UXP7] | transcript_product=ubiquitin-specific protease USP4 | location=TGGT1_chrVIIb:537753-547788(+) | protein_length=1171 | sequence_SO=chromosome | SO=protein_coding_gene | is_pseudo=false	1	2248.18	15	1.022	1.205	1.11	0.847	0.866	1.021	0.94	0.899	0.86	0.871	0.03	0.27	0.15	-0.24	-0.21	0.03	-0.09	-0.15	-0.22	-0.2	0.950935	0.332688	0.728279	0.75916	0.485423	0.956427	0.798498	0.391597	0.503201	0.405271	0.993655
FALSE	High	LVQSQLNEQEVPLR	[K].LVQSQLNEQEVPLR.[E]	1xTMTpro [N-Term]; 1xPhospho [S4(100)]	1xTMTpro [N-Term]; 1xPhospho [S4(100)]	1.38466e-05	5.34993e-05	1	1	1	TGGT1_266080-t26_1-p1	TGGT1_266080-t26_1-p1 [542-555]	TGGT1_266080-t26_1-p1 1xPhospho [S545(100)]	TGGT1_266080-t26_1-p1 1xPhospho [S545(100)]	transcript=TGGT1_266080-t26_1 | gene=TGGT1_266080 | organism=Toxoplasma_gondii_GT1 | gene_product=hypothetical protein | transcript_product=hypothetical protein | location=TGGT1_chrIX:1138397-1140583(+) | protein_length=728 | sequence_SO=chromosome | SO=protein_coding_gene | is_pseudo=false	0	2037.07	14
FALSE	High	LVRDSVSPER	[R].LVRDSVSPER.[R]	1xTMTpro [N-Term]; 2xPhospho [S5(100); S7(100)]	1xTMTpro [N-Term]; 2xPhospho [S5(100); S7(100)]	0.000273959	5.34993e-05	1	1	37	TGGT1_313180-t26_1-p1	TGGT1_313180-t26_1-p1 [48-57]	TGGT1_313180-t26_1-p1 2xPhospho [S52(100); S54(100)]	TGGT1_313180-t26_1-p1 2xPhospho [S52(100); S54(100)]	transcript=TGGT1_313180-t26_1 | gene=TGGT1_313180 | organism=Toxoplasma_gondii_GT1 | gene_product=Protein kinase domain-containing protein [Source:UniProtKB/TrEMBL;Acc:S7UT92] | transcript_product=putative cell-cycle-associated protein kinase PRP4 | location=TGGT1_chrXI:3115853-3121175(-) | protein_length=928 | sequence_SO=chromosome | SO=protein_coding_gene | is_pseudo=false	1	1621.77	10	0.902	0.951	0.952	1.147	1.035	1.091	1.092	1.095	1.012	1.009	-0.15	-0.07	-0.07	0.2	0.05	0.13	0.13	0.13	0.02	0.01	0.153119	0.65214	0.70473	0.586727	0.862196	0.538623	0.479914	0.649489	0.860543	0.515537	0.8946
FALSE	High	LVRPQLDDSDDDSQK	[R].LVRPQLDDSDDDSQK.[R]	1xTMTpro [K15]; 1xTMTpro [N-Term]; 1xPhospho [S9(100)]	1xTMTpro [K15]; 1xTMTpro [N-Term]; 1xPhospho [S9(100); S13(0)]	3.71893e-05	5.34993e-05	1	1	4	TGGT1_312065-t26_1-p1	TGGT1_312065-t26_1-p1 [17-31]	TGGT1_312065-t26_1-p1 1xPhospho [S25(100); S29(0)]	TGGT1_312065-t26_1-p1 1xPhospho [S25(100)]	transcript=TGGT1_312065-t26_1 | gene=TGGT1_312065 | organism=Toxoplasma_gondii_GT1 | gene_product=hypothetical protein | transcript_product=hypothetical protein | location=TGGT1_chrXI:2365577-2378498(-) | protein_length=1793 | sequence_SO=chromosome | SO=protein_coding_gene | is_pseudo=false	0	2419.2	15	1.222	0.965	1.169	0.962	1.176	0.928	1.125	0.898	0.807	0.976	0.29	-0.05	0.23	-0.06	0.23	-0.11	0.17	-0.16	-0.31	-0.03	0.276024	0.868655	0.362823	0.880478	0.681396	0.256131	0.45635	0.410588	0.515238	0.68836	0.904439
FALSE	High	LVSASSVMTQQLGK	[R].LVSASSVMTQQLGK.[S]	1xTMTpro [K14]; 1xTMTpro [N-Term]; 1xPhospho [S3(100)]	1xTMTpro [K14]; 1xTMTpro [N-Term]; 1xPhospho [S3(100); S5(0); S6(0); T9(0)]	5.68319e-05	5.34993e-05	1	1	2	TGGT1_256760-t26_1-p1	TGGT1_256760-t26_1-p1 [22-35]	TGGT1_256760-t26_1-p1 1xPhospho [S24(100); S26(0); S27(0); T30(0)]	TGGT1_256760-t26_1-p1 1xPhospho [S24(100)]	transcript=TGGT1_256760-t26_1 | gene=TGGT1_256760 | organism=Toxoplasma_gondii_GT1 | gene_product=Pyruvate kinase [Source:UniProtKB/TrEMBL;Acc:A0A125YPV3] | transcript_product=pyruvate kinase PyK1 | location=TGGT1_chrVIIb:4413512-4417055(-) | protein_length=531 | sequence_SO=chromosome | SO=protein_coding_gene | is_pseudo=false	0	2137.16	14	1.07	1.006	1.029	1.041	1.114	1.047	1.07	1.075	1.047	0.92	0.1	0.01	0.04	0.06	0.16	0.07	0.1	0.1	0.07	-0.12	0.781327	0.965731	0.918182	0.944898	0.757809	0.914153	0.825048	0.860403	0.878473	0.809179	0.970678
FALSE	High	LVLLSDHEEDGSGDQEVSSDPIRPWGEGTTTR	[R].LVLLSDHEEDGSGDQEVSSDPIRPWGEGTTTR.[G]	1xTMTpro [N-Term]; 1xPhospho [S5(100)]	1xTMTpro [N-Term]; 1xPhospho [S5(100); S12(0); S18(0); S19(0); T29(0); T30(0); T31(0)]	2.59948e-07	5.34993e-05	1	1	4	TGGT1_229630-t26_1-p1	TGGT1_229630-t26_1-p1 [1858-1889]	TGGT1_229630-t26_1-p1 1xPhospho [S1862(100); S1869(0); S1875(0); S1876(0); T1886(0); T1887(0); T1888(0)]	TGGT1_229630-t26_1-p1 1xPhospho [S1862(100)]	transcript=TGGT1_229630-t26_1 | gene=TGGT1_229630 | organism=Toxoplasma_gondii_GT1 | gene_product=Protein kinase domain-containing protein [Source:UniProtKB/TrEMBL;Acc:S7V372] | transcript_product=eIF2 kinase IF2K-A (incomplete catalytic triad) | location=TGGT1_chrVIII:323939-342025(+) | protein_length=4638 | sequence_SO=chromosome | SO=protein_coding_gene | is_pseudo=false	0	3866.8	32	1.055	1.112	0.885	0.868	0.916	0.965	0.768	0.938	0.892	0.897	0.08	0.15	-0.18	-0.2	-0.13	-0.05	-0.38	-0.09	-0.17	-0.16	0.592242	0.588698	0.36515	0.0526099	0.383989	0.830389	0.158943	0.654393	0.302852	0.724913	0.937333
FALSE	High	LVSASSVMTQQLGK	[R].LVSASSVMTQQLGK.[S]	1xOxidation [M8]; 1xTMTpro [K14]; 1xTMTpro [N-Term]; 1xPhospho [S3(100)]	1xOxidation [M8]; 1xTMTpro [K14]; 1xTMTpro [N-Term]; 1xPhospho [S3(100); S5(0); S6(0); T9(0)]	0.000289356	5.34993e-05	1	1	2	TGGT1_256760-t26_1-p1	TGGT1_256760-t26_1-p1 [22-35]	TGGT1_256760-t26_1-p1 1xPhospho [S24(100); S26(0); S27(0); T30(0)]	TGGT1_256760-t26_1-p1 1xPhospho [S24(100)]	transcript=TGGT1_256760-t26_1 | gene=TGGT1_256760 | organism=Toxoplasma_gondii_GT1 | gene_product=Pyruvate kinase [Source:UniProtKB/TrEMBL;Acc:A0A125YPV3] | transcript_product=pyruvate kinase PyK1 | location=TGGT1_chrVIIb:4413512-4417055(-) | protein_length=531 | sequence_SO=chromosome | SO=protein_coding_gene | is_pseudo=false	0	2153.15	14	0.851	0.893	0.969	1.184	1.008	1.058	1.147	1.157	1.14	1.075	-0.23	-0.16	-0.05	0.24	0.01	0.08	0.2	0.21	0.19	0.1	0.192146	0.0941938	0.746483	0.225703	0.633256	0.436107	0.0588394	0.217377	0.453892	0.233337	0.900211
FALSE	High	IVEEEDSAGDEGEAGEDR	[R].IVEEEDSAGDEGEAGEDR.[K]	1xTMTpro [N-Term]; 1xPhospho [S7(100)]	1xTMTpro [N-Term]; 1xPhospho [S7(100)]	2.89064e-08	5.34993e-05	1	1	2	TGGT1_257560-t26_1-p1	TGGT1_257560-t26_1-p1 [39-56]	TGGT1_257560-t26_1-p1 1xPhospho [S45(100)]	TGGT1_257560-t26_1-p1 1xPhospho [S45(100)]	transcript=TGGT1_257560-t26_1 | gene=TGGT1_257560 | organism=Toxoplasma_gondii_GT1 | gene_product=WD_REPEATS_REGION domain-containing protein [Source:UniProtKB/TrEMBL;Acc:S7UZF8] | transcript_product=WD domain, G-beta repeat-containing protein | location=TGGT1_chrVIIb:3904702-3908262(+) | protein_length=1017 | sequence_SO=chromosome | SO=protein_coding_gene | is_pseudo=false	0	2290.95	18	0.981	1.084	1.093	1.004	0.986	1.088	1.097	0.878	1.133	1.153	-0.03	0.12	0.13	0.01	-0.02	0.12	0.13	-0.19	0.18	0.21	0.901427	0.836939	0.654287	0.977537	0.0154873	0.729464	0.181301	0.473633	0.380776	0.189667	0.986843
FALSE	High	LVEAEEEEEEDAESAQEEQGER	[K].LVEAEEEEEEDAESAQEEQGER.[G]	1xTMTpro [N-Term]; 1xPhospho [S14(100)]	1xTMTpro [N-Term]; 1xPhospho [S14(100)]	3.35072e-11	5.34993e-05	1	1	10	TGGT1_210830-t26_1-p1	TGGT1_210830-t26_1-p1 [754-775]	TGGT1_210830-t26_1-p1 1xPhospho [S767(100)]	TGGT1_210830-t26_1-p1 1xPhospho [S767(100)]	transcript=TGGT1_210830-t26_1 | gene=TGGT1_210830 | organism=Toxoplasma_gondii_GT1 | gene_product=RIO domain-containing protein [Source:UniProtKB/TrEMBL;Acc:S7VTG6] | transcript_product=RIO1 family protein | location=TGGT1_chrIV:1952686-1957204(+) | protein_length=1015 | sequence_SO=chromosome | SO=protein_coding_gene | is_pseudo=false	0	2919.22	22	0.96	1.155	0.95	0.926	0.889	1.07	0.88	1.104	0.739	0.849	-0.06	0.21	-0.07	-0.11	-0.17	0.1	-0.18	0.14	-0.44	-0.24	0.897424	0.0657402	0.797121	0.750616	0.322373	0.792718	0.14562	0.50685	0.275115	0.0507161	0.986237
FALSE	High	LTNAPSEHEAR	[R].LTNAPSEHEAR.[G]	1xTMTpro [N-Term]; 1xPhospho [S6(100)]	1xTMTpro [N-Term]; 1xPhospho [T2(0); S6(100)]	0.000129867	5.34993e-05	1	1	5	TGGT1_273800-t26_1-p1	TGGT1_273800-t26_1-p1 [1165-1175]	TGGT1_273800-t26_1-p1 1xPhospho [T1166(0); S1170(100)]	TGGT1_273800-t26_1-p1 1xPhospho [S1170(100)]	transcript=TGGT1_273800-t26_1 | gene=TGGT1_273800 | organism=Toxoplasma_gondii_GT1 | gene_product=WD_REPEATS_REGION domain-containing protein [Source:UniProtKB/TrEMBL;Acc:S7V3G9] | transcript_product=WD domain, G-beta repeat-containing protein | location=TGGT1_chrVIII:3241752-3255404(+) | protein_length=3633 | sequence_SO=chromosome | SO=protein_coding_gene | is_pseudo=false	0	1608.77	11	1.006	0.928	0.623	1.045	1.051	0.969	0.651	1.245	0.97	0.971	0.01	-0.11	-0.68	0.06	0.07	-0.04	-0.62	0.32	-0.04	-0.04	0.983954	0.554406	0.37444	0.911976	0.69147	0.913508	0.000320791	0.216323	0.499831	0.754853	0.996394
FALSE	High	LTNQPALSFVGEHAK	[R].LTNQPALSFVGEHAK.[A]	1xTMTpro [K15]; 1xTMTpro [N-Term]; 1xPhospho [S8(100)]	1xTMTpro [K15]; 1xTMTpro [N-Term]; 1xPhospho [T2(0); S8(100)]	8.16571e-10	5.34993e-05	1	1	1	TGGT1_248340-t26_1-p1	TGGT1_248340-t26_1-p1 [182-196]	TGGT1_248340-t26_1-p1 1xPhospho [T183(0); S189(100)]	TGGT1_248340-t26_1-p1 1xPhospho [S189(100)]	transcript=TGGT1_248340-t26_1 | gene=TGGT1_248340 | organism=Toxoplasma_gondii_GT1 | gene_product=GTP-binding nuclear protein [Source:UniProtKB/TrEMBL;Acc:S7V0L0] | transcript_product=GTP-binding nuclear protein ran/tc4 | location=TGGT1_chrXII:3749189-3752256(+) | protein_length=229 | sequence_SO=chromosome | SO=protein_coding_gene | is_pseudo=false	0	2300.23	15	0.938	1.082	0.93	1.114	1.045	1.205	1.036	1.211	1.073	1.005	-0.09	0.11	-0.1	0.16	0.06	0.27	0.05	0.28	0.1	0.01	0.298241	0.222502	0.312676	0.546774	0.719017	0.304008	0.753534	0.0321317	0.498356	0.978833	0.904778
FALSE	High	LTPDQVSPWSSTALQFMR	[R].LTPDQVSPWSSTALQFMR.[S]	1xTMTpro [N-Term]; 1xPhospho [T2(100)]	1xTMTpro [N-Term]; 1xPhospho [T2(100); S7(0); S10(0); S11(0); T12(0)]	2.85333e-09	5.34993e-05	1	1	1	TGGT1_259640-t26_1-p1	TGGT1_259640-t26_1-p1 [939-956]	TGGT1_259640-t26_1-p1 1xPhospho [T940(100); S945(0); S948(0); S949(0); T950(0)]	TGGT1_259640-t26_1-p1 1xPhospho [T940(100)]	transcript=TGGT1_259640-t26_1 | gene=TGGT1_259640 | organism=Toxoplasma_gondii_GT1 | gene_product=Peptidase S59 domain-containing protein [Source:UniProtKB/TrEMBL;Acc:S7UYU4] | transcript_product=nucleoporin autopeptidase | location=TGGT1_chrVIIb:2709338-2721341(-) | protein_length=2894 | sequence_SO=chromosome | SO=protein_coding_gene | is_pseudo=false	0	2448.2	18
FALSE	High	LTPGPLHR	[R].LTPGPLHR.[A]	1xTMTpro [N-Term]; 1xPhospho [T2(100)]	1xTMTpro [N-Term]; 1xPhospho [T2(100)]	0.000329081	5.34993e-05	1	1	1	TGGT1_263610-t26_1-p1	TGGT1_263610-t26_1-p1 [2443-2450]	TGGT1_263610-t26_1-p1 1xPhospho [T2444(100)]	TGGT1_263610-t26_1-p1 1xPhospho [T2444(100)]	transcript=TGGT1_263610-t26_1 | gene=TGGT1_263610 | organism=Toxoplasma_gondii_GT1 | gene_product=hypothetical protein | transcript_product=hypothetical protein | location=TGGT1_chrVIIb:406014-425103(+) | protein_length=4526 | sequence_SO=chromosome | SO=protein_coding_gene | is_pseudo=false	0	1274.69	8
FALSE	High	ITPPAAKPGSPQAK	[R].ITPPAAKPGSPQAK.[S]	2xTMTpro [K7; K14]; 1xTMTpro [N-Term]; 1xPhospho [S10(100)]	2xTMTpro [K7; K14]; 1xTMTpro [N-Term]; 1xPhospho [T2(0); S10(100)]	4.96696e-05	5.34993e-05	1	1	2	P35658	P35658 [669-682]	P35658 1xPhospho [T670(0); S678(100)]	P35658 1xPhospho [S678(100)]	Nuclear pore complex protein Nup214 OS=Homo sapiens (Human) OX=9606 GN=NUP214 PE=1 SV=2	0	2355.36	14	1.452	0.897	1.503	1.073	1.558	0.963	1.612	0.958	1.265	2.291	0.54	-0.16	0.59	0.1	0.64	-0.06	0.69	-0.06	0.34	1.2	0.327072	0.605871	0.284957	0.872056	0.570719	0.951068	0.191646	0.917811	0.60958	0.152563	0.9065
FALSE	High	LTPPQFSLSPTR	[R].LTPPQFSLSPTR.[R]	1xTMTpro [N-Term]; 1xPhospho [S9(99.7)]	1xTMTpro [N-Term]; 1xPhospho [T2(0); S7(0); S9(99.7); T11(0.3)]	3.67495e-05	5.34993e-05	1	1	1	TGGT1_227610-t26_1-p1	TGGT1_227610-t26_1-p1 [498-509]	TGGT1_227610-t26_1-p1 1xPhospho [T499(0); S504(0); S506(99.7); T508(0.3)]	TGGT1_227610-t26_1-p1 1xPhospho [S506(99.7)]	transcript=TGGT1_227610-t26_1 | gene=TGGT1_227610 | organism=Toxoplasma_gondii_GT1 | gene_product=hypothetical protein | transcript_product=hypothetical protein | location=TGGT1_chrX:785051-801902(+) | protein_length=3648 | sequence_SO=chromosome | SO=protein_coding_gene | is_pseudo=false	0	1727.91	12
FALSE	High	LTPSDTYPTGHLDGQLR	[R].LTPSDTYPTGHLDGQLR.[G]	1xTMTpro [N-Term]; 1xPhospho [T2(100)]	1xTMTpro [N-Term]; 1xPhospho [T2(100); S4(0); T6(0); Y7(0); T9(0)]	1.97916e-05	5.34993e-05	1	1	1	TGGT1_244500-t26_1-p1	TGGT1_244500-t26_1-p1 [288-304]	TGGT1_244500-t26_1-p1 1xPhospho [T289(100); S291(0); T293(0); Y294(0); T296(0)]	TGGT1_244500-t26_1-p1 1xPhospho [T289(100)]	transcript=TGGT1_244500-t26_1 | gene=TGGT1_244500 | organism=Toxoplasma_gondii_GT1 | gene_product=Tubulin-tyrosine ligase family protein [Source:UniProtKB/TrEMBL;Acc:S7UFX3] | transcript_product=Tubulin-tyrosine ligase family protein | location=TGGT1_chrVI:3224108-3234719(-) | protein_length=2376 | sequence_SO=chromosome | SO=protein_coding_gene | is_pseudo=false	0	2255.1	17	0.743	0.634	0.591	1.374	1.021	0.871	0.812	0.82	0.974	0.964	-0.43	-0.66	-0.76	0.46	0.03	-0.2	-0.3	-0.29	-0.04	-0.05	0.64552	0.140563	0.366131	0.607759	0.605338	0.758495	0.305242	0.236883	0.440365	0.915723	0.947964
FALSE	High	ITPSYVAFTDDDRK	[R].ITPSYVAFTDDDRK.[I]	1xTMTpro [K14]; 1xTMTpro [N-Term]	1xTMTpro [K14]; 1xTMTpro [N-Term]	0.000242671	5.34993e-05	1	1	2	TGGT1_311720-t26_1-p1	TGGT1_311720-t26_1-p1 [72-85]			transcript=TGGT1_311720-t26_1 | gene=TGGT1_311720 | organism=Toxoplasma_gondii_GT1 | gene_product=Chaperonin protein BiP [Source:UniProtKB/TrEMBL;Acc:A0A125YJG4] | transcript_product=chaperonin protein BiP | location=TGGT1_chrXI:2188121-2191497(-) | protein_length=668 | sequence_SO=chromosome | SO=protein_coding_gene | is_pseudo=false	1	2236.21	14	1.003	1.108	1.069	0.893	0.896	0.99	0.955	0.909	0.858	0.671	0	0.15	0.1	-0.16	-0.16	-0.01	-0.07	-0.14	-0.22	-0.58	0.990442	0.299813	0.52727	0.209256	0.648516	0.927826	0.407336	0.454002	0.408457	0.193028	0.996938
FALSE	High	LTPTSQQLPTPTR	[R].LTPTSQQLPTPTR.[S]	1xTMTpro [N-Term]; 1xPhospho [T2(100)]	1xTMTpro [N-Term]; 1xPhospho [T2(100); T4(0); S5(0); T10(0); T12(0)]	3.12057e-07	5.34993e-05	1	1	4	TGGT1_310000-t26_1-p1	TGGT1_310000-t26_1-p1 [664-676]	TGGT1_310000-t26_1-p1 1xPhospho [T665(100); T667(0); S668(0); T673(0); T675(0)]	TGGT1_310000-t26_1-p1 1xPhospho [T665(100)]	transcript=TGGT1_310000-t26_1 | gene=TGGT1_310000 | organism=Toxoplasma_gondii_GT1 | gene_product=Putative membrane protein [Source:UniProtKB/TrEMBL;Acc:S7UTA7] | transcript_product=putative membrane protein | location=TGGT1_chrXI:960190-965833(+) | protein_length=719 | sequence_SO=chromosome | SO=protein_coding_gene | is_pseudo=false	0	1823.96	13	0.939	1.005	1.081	1.1	1.032	1.106	1.189	1.029	1.292	1.167	-0.09	0.01	0.11	0.14	0.05	0.14	0.25	0.04	0.37	0.22	0.675241	0.91342	0.078184	0.604268	0.917912	0.483252	0.43826	0.72802	0.00666723	0.483873	0.952203
FALSE	High	LTPVNSPLHALR	[R].LTPVNSPLHALR.[N]	1xTMTpro [N-Term]; 2xPhospho [T2(100); S6(100)]	1xTMTpro [N-Term]; 2xPhospho [T2(100); S6(100)]	6.43505e-06	5.34993e-05	1	1	1	TGGT1_255220-t26_1-p1	TGGT1_255220-t26_1-p1 [851-862]	TGGT1_255220-t26_1-p1 2xPhospho [T852(100); S856(100)]	TGGT1_255220-t26_1-p1 2xPhospho [T852(100); S856(100)]	transcript=TGGT1_255220-t26_1 | gene=TGGT1_255220 | organism=Toxoplasma_gondii_GT1 | gene_product=AP2 domain transcription factor AP2VIIb-3 [Source:UniProtKB/TrEMBL;Acc:S7WAT4] | transcript_product=AP2 domain transcription factor AP2VIIb-3 | location=TGGT1_chrVIIb:4894610-4902012(-) | protein_length=2287 | sequence_SO=chromosome | SO=protein_coding_gene | is_pseudo=false	0	1781.9	12
FALSE	High	LTQPTQFAPLQPVSSSVDSPR	[R].LTQPTQFAPLQPVSSSVDSPR.[C]	1xTMTpro [N-Term]; 1xPhospho [S19(98.7)]	1xTMTpro [N-Term]; 1xPhospho [T2(0); T5(0); S14(0); S15(0.6); S16(0.6); S19(98.7)]	2.06018e-09	5.34993e-05	1	1	1	TGGT1_271990-t26_1-p1	TGGT1_271990-t26_1-p1 [111-131]	TGGT1_271990-t26_1-p1 1xPhospho [T112(0); T115(0); S124(0); S125(0.6); S126(0.6); S129(98.7)]	TGGT1_271990-t26_1-p1 1xPhospho [S129(98.7)]	transcript=TGGT1_271990-t26_1 | gene=TGGT1_271990 | organism=Toxoplasma_gondii_GT1 | gene_product=hypothetical protein | transcript_product=hypothetical protein | location=TGGT1_chrVIII:4235238-4242838(-) | protein_length=1512 | sequence_SO=chromosome | SO=protein_coding_gene | is_pseudo=false	0	2639.34	21
FALSE	High	LTQVDVPSTFPAQVEEEEDLKASAR	[K].LTQVDVPSTFPAQVEEEEDLKASAR.[H]	1xTMTpro [K21]; 1xTMTpro [N-Term]; 1xPhospho [S23(100)]	1xTMTpro [K21]; 1xTMTpro [N-Term]; 1xPhospho [T2(0); S8(0); T9(0); S23(100)]	7.50657e-07	5.34993e-05	1	1	1	TGGT1_246720-t26_1-p1	TGGT1_246720-t26_1-p1 [410-434]	TGGT1_246720-t26_1-p1 1xPhospho [T411(0); S417(0); T418(0); S432(100)]	TGGT1_246720-t26_1-p1 1xPhospho [S432(100)]	transcript=TGGT1_246720-t26_1 | gene=TGGT1_246720 | organism=Toxoplasma_gondii_GT1 | gene_product=hypothetical protein | transcript_product=hypothetical protein | location=TGGT1_chrXII:2874731-2876239(+) | protein_length=502 | sequence_SO=chromosome | SO=protein_coding_gene | is_pseudo=false	1	3447.75	25	0.975	0.585	0.558	1.033	1.007	0.605	0.576	0.957	0.561	0.564	-0.04	-0.77	-0.84	0.05	0.01	-0.73	-0.8	-0.06	-0.83	-0.83	0.678467	0.319321	0.343411	0.7532	0.963314	0.255886	0.289633	0.703319	0.223997	0.223876	0.952274
FALSE	High	IVEDDGQADEGGGSER	[R].IVEDDGQADEGGGSER.[E]	1xTMTpro [N-Term]	1xTMTpro [N-Term]	8.49698e-06	5.34993e-05	1	1	1	TGGT1_294050-t26_1-p1	TGGT1_294050-t26_1-p1 [285-300]			transcript=TGGT1_294050-t26_1 | gene=TGGT1_294050 | organism=Toxoplasma_gondii_GT1 | gene_product=hypothetical protein | transcript_product=hypothetical protein | location=TGGT1_chrIa:649262-650986(-) | protein_length=574 | sequence_SO=chromosome | SO=protein_coding_gene | is_pseudo=false	0	1937.9	16
FALSE	High	LTSGGSTGAPR	[R].LTSGGSTGAPR.[K]	1xTMTpro [N-Term]; 1xPhospho [S6(99.7)]	1xTMTpro [N-Term]; 1xPhospho [T2(0); S3(0); S6(99.7); T7(0.3)]	0.000227033	5.34993e-05	1	1	2	TGGT1_312640-t26_1-p1	TGGT1_312640-t26_1-p1 [136-146]	TGGT1_312640-t26_1-p1 1xPhospho [T137(0); S138(0); S141(99.7); T142(0.3)]	TGGT1_312640-t26_1-p1 1xPhospho [S141(99.7)]	transcript=TGGT1_312640-t26_1 | gene=TGGT1_312640 | organism=Toxoplasma_gondii_GT1 | gene_product=PUB domain-containing protein [Source:UniProtKB/TrEMBL;Acc:S7UTP0] | transcript_product=hypothetical protein | location=TGGT1_chrXI:2830072-2831896(+) | protein_length=290 | sequence_SO=chromosome | SO=protein_coding_gene | is_pseudo=false	0	1387.69	11
FALSE	High	LTSLEDSTSHGPPDGVADQHVALK	[R].LTSLEDSTSHGPPDGVADQHVALK.[L]	1xTMTpro [K24]; 1xTMTpro [N-Term]; 1xPhospho [S/T]	1xTMTpro [K24]; 1xTMTpro [N-Term]; 1xPhospho [T2(0); S3(0); S7(33.3); T8(33.3); S9(33.3)]	1.04987e-08	5.34993e-05	1	1	2	TGGT1_273800-t26_1-p1	TGGT1_273800-t26_1-p1 [3086-3109]			transcript=TGGT1_273800-t26_1 | gene=TGGT1_273800 | organism=Toxoplasma_gondii_GT1 | gene_product=WD_REPEATS_REGION domain-containing protein [Source:UniProtKB/TrEMBL;Acc:S7V3G9] | transcript_product=WD domain, G-beta repeat-containing protein | location=TGGT1_chrVIII:3241752-3255404(+) | protein_length=3633 | sequence_SO=chromosome | SO=protein_coding_gene | is_pseudo=false	0	3162.6	24	1.115	1.119	1.032	0.917	1.022	1.027	0.947	0.938	0.878	0.918	0.16	0.16	0.05	-0.12	0.03	0.04	-0.08	-0.09	-0.19	-0.12	0.665087	0.0451445	0.497143	0.635244	0.748152	0.869118	0.687442	0.612381	0.102438	0.631703	0.95087
FALSE	High	LTSSSQNLESPR	[R].LTSSSQNLESPR.[H]	1xTMTpro [N-Term]; 1xPhospho [S10(100)]	1xTMTpro [N-Term]; 1xPhospho [T2(0); S3(0); S4(0); S5(0); S10(100)]	4.28316e-08	5.34993e-05	1	1	5	TGGT1_295710-t26_1-p1	TGGT1_295710-t26_1-p1 [5466-5477]	TGGT1_295710-t26_1-p1 1xPhospho [T5467(0); S5468(0); S5469(0); S5470(0); S5475(100)]	TGGT1_295710-t26_1-p1 1xPhospho [S5475(100)]	transcript=TGGT1_295710-t26_1 | gene=TGGT1_295710 | organism=Toxoplasma_gondii_GT1 | gene_product=HECT-domain (Ubiquitin-transferase) domain-containing protein [Source:UniProtKB/TrEMBL;Acc:S7UJ61] | transcript_product=HECT-domain (ubiquitin-transferase) domain-containing protein | location=TGGT1_chrIa:1556788-1587317(-) | protein_length=8007 | sequence_SO=chromosome | SO=protein_coding_gene | is_…	0	1702.83	12
FALSE	High	LTVPACTNKDDEEETLVGETAR	[K].LTVPACTNKDDEEETLVGETAR.[E]	1xMethylthio [C6]; 1xTMTpro [K9]; 1xTMTpro [N-Term]; 1xPhospho [T15(100)]	1xMethylthio [C6]; 1xTMTpro [K9]; 1xTMTpro [N-Term]; 1xPhospho [T2(0); T7(0); T15(100); T20(0)]	0.000281555	5.34993e-05	1	1	1	TGGT1_315140-t26_1-p1	TGGT1_315140-t26_1-p1 [1090-1111]	TGGT1_315140-t26_1-p1 1xMethylthio [C1095]; 1xPhospho [T1091(0); T1096(0); T1104(100); T1109(0)]	TGGT1_315140-t26_1-p1 1xMethylthio [C1095]; 1xPhospho [T1104(100)]	transcript=TGGT1_315140-t26_1 | gene=TGGT1_315140 | organism=Toxoplasma_gondii_GT1 | gene_product=WD_REPEATS_REGION domain-containing protein [Source:UniProtKB/TrEMBL;Acc:S7UMA9] | transcript_product=WD domain, G-beta repeat-containing protein | location=TGGT1_chrXI:4459459-4466175(-) | protein_length=1462 | sequence_SO=chromosome | SO=protein_coding_gene | is_pseudo=false	1	3125.5	22	1.219	0.936	1.029	0.928	1.132	0.868	0.955	1.083	1.028	1.061	0.29	-0.1	0.04	-0.11	0.18	-0.2	-0.07	0.11	0.04	0.09	0.029045	0.400406	0.866161	0.310635	0.238554	0.354992	0.834896	0.747769	0.609952	0.740187	0.8946
FALSE	High	LVAAVDEREDSDDEENEGAYR	[K].LVAAVDEREDSDDEENEGAYR.[E]	1xTMTpro [N-Term]; 1xPhospho [S11(100)]	1xTMTpro [N-Term]; 1xPhospho [S11(100); Y20(0)]	9.16257e-10	5.34993e-05	1	1	5	TGGT1_306660-t26_1-p1	TGGT1_306660-t26_1-p1 [4614-4634]	TGGT1_306660-t26_1-p1 1xPhospho [S4624(100); Y4633(0)]	TGGT1_306660-t26_1-p1 1xPhospho [S4624(100)]	transcript=TGGT1_306660-t26_1 | gene=TGGT1_306660 | organism=Toxoplasma_gondii_GT1 | gene_product=MATH domain-containing protein [Source:UniProtKB/TrEMBL;Acc:S7UIG4] | transcript_product=RNA pseudouridine synthase superfamily protein | location=TGGT1_chrIX:6025601-6045208(-) | protein_length=6535 | sequence_SO=chromosome | SO=protein_coding_gene | is_pseudo=false	1	2766.21	21
FALSE	High	LVADFFSSSPPSSSSPPSSPSPPSSR	[R].LVADFFSSSPPSSSSPPSSPSPPSSR.[S]	1xTMTpro [N-Term]; 1xPhospho [S8(98)]	1xTMTpro [N-Term]; 1xPhospho [S7(0); S8(98); S9(0.4); S12(0.4); S13(0.4); S14(0.4); S15(0.4); S18(0); S19(0); S21(0); S24(0); S25(0)]	2.56594e-08	5.34993e-05	1	1	1	TGGT1_247330-t26_1-p1	TGGT1_247330-t26_1-p1 [1153-1178]	TGGT1_247330-t26_1-p1 1xPhospho [S1159(0); S1160(98); S1161(0.4); S1164(0.4); S1165(0.4); S1166(0.4); S1167(0.4); S1170(0); S1171(0); S1173(0); S1176(0); S1177(0)]	TGGT1_247330-t26_1-p1 1xPhospho [S1160(98)]	transcript=TGGT1_247330-t26_1 | gene=TGGT1_247330 | organism=Toxoplasma_gondii_GT1 | gene_product=Symplekin_C domain-containing protein [Source:UniProtKB/TrEMBL;Acc:S7W9Q9] | transcript_product=hypothetical protein | location=TGGT1_chrXII:3187009-3202779(-) | protein_length=1940 | sequence_SO=chromosome | SO=protein_coding_gene | is_pseudo=false	0	2975.4	26
FALSE	High	LVADFFSSSPPSSSSPPSSPSPPSSR	[R].LVADFFSSSPPSSSSPPSSPSPPSSR.[S]	1xTMTpro [N-Term]; 2xPhospho [S15(98.7); S21(99.1)]	1xTMTpro [N-Term]; 2xPhospho [S7(0); S8(0); S9(0); S12(0.4); S13(0.4); S14(0.4); S15(98.7); S18(0); S19(0); S21(99.1); S24(0.4); S25(0.4)]	6.03807e-10	5.34993e-05	1	1	2	TGGT1_247330-t26_1-p1	TGGT1_247330-t26_1-p1 [1153-1178]	TGGT1_247330-t26_1-p1 2xPhospho [S1159(0); S1160(0); S1161(0); S1164(0.4); S1165(0.4); S1166(0.4); S1167(98.7); S1170(0); S1171(0); S1173(99.1); S1176(0.4); S1177(0.4)]	TGGT1_247330-t26_1-p1 2xPhospho [S1167(98.7); S1173(99.1)]	transcript=TGGT1_247330-t26_1 | gene=TGGT1_247330 | organism=Toxoplasma_gondii_GT1 | gene_product=Symplekin_C domain-containing protein [Source:UniProtKB/TrEMBL;Acc:S7W9Q9] | transcript_product=hypothetical protein | location=TGGT1_chrXII:3187009-3202779(-) | protein_length=1940 | sequence_SO=chromosome | SO=protein_coding_gene | is_pseudo=false	0	3055.37	26
FALSE	High	LVADVLSEDENDEEPESQGK	[K].LVADVLSEDENDEEPESQGK.[R]	1xTMTpro [K20]; 1xTMTpro [N-Term]; 1xPhospho [S7(100)]	1xTMTpro [K20]; 1xTMTpro [N-Term]; 1xPhospho [S7(100); S17(0)]	2.38632e-09	5.34993e-05	1	1	2	TGGT1_291090-t26_1-p1	TGGT1_291090-t26_1-p1 [644-663]	TGGT1_291090-t26_1-p1 1xPhospho [S650(100); S660(0)]	TGGT1_291090-t26_1-p1 1xPhospho [S650(100)]	transcript=TGGT1_291090-t26_1 | gene=TGGT1_291090 | organism=Toxoplasma_gondii_GT1 | gene_product=SWI2/SNF2-containing protein [Source:UniProtKB/TrEMBL;Acc:S7UQD5] | transcript_product=SWI2/SNF2-containing protein | location=TGGT1_chrIX:3921554-3935307(+) | protein_length=2045 | sequence_SO=chromosome | SO=protein_coding_gene | is_pseudo=false	0	2891.37	20	1.081	0.98	1.104	0.856	0.926	0.839	0.946	0.852	0.874	0.72	0.11	-0.03	0.14	-0.22	-0.11	-0.25	-0.08	-0.23	-0.19	-0.47	0.78397	0.840247	0.609064	0.00704652	0.788972	0.278491	0.761841	0.0113166	0.464455	0.408268	0.971185
FALSE	High	IVDDITADQENDESGKSDESDADKAESR	[K].IVDDITADQENDESGKSDESDADKAESR.[E]	2xTMTpro [K16; K24]; 1xTMTpro [N-Term]; 3xPhospho [S14(99.3); S17(99.3); S20(100)]	2xTMTpro [K16; K24]; 1xTMTpro [N-Term]; 3xPhospho [T6(1.5); S14(99.3); S17(99.3); S20(100); S27(0)]	2.72638e-07	5.34993e-05	1	1	2	TGGT1_216410-t26_1-p1	TGGT1_216410-t26_1-p1 [59-86]	TGGT1_216410-t26_1-p1 3xPhospho [T64(1.5); S72(99.3); S75(99.3); S78(100); S85(0)]	TGGT1_216410-t26_1-p1 3xPhospho [S72(99.3); S75(99.3); S78(100)]	transcript=TGGT1_216410-t26_1 | gene=TGGT1_216410 | organism=Toxoplasma_gondii_GT1 | gene_product=hypothetical protein | transcript_product=hypothetical protein | location=TGGT1_chrXI:6088277-6089486(+) | protein_length=188 | sequence_SO=chromosome | SO=protein_coding_gene | is_pseudo=false	2	4191.83	28	0.719	0.885	0.704	1.498	1.077	1.326	1.055	1.26	0.927	1.315	-0.48	-0.18	-0.51	0.58	0.11	0.41	0.08	0.33	-0.11	0.4	0.0906219	0.73165	0.199793	0.0194237	0.282084	0.472408	0.690493	0.480058	0.875155	0.102406	0.8946
FALSE	High	LVDEPVETLHLK	[K].LVDEPVETLHLK.[I]	1xTMTpro [K12]; 1xTMTpro [N-Term]	1xTMTpro [K12]; 1xTMTpro [N-Term]	1.10431e-09	5.34993e-05	1	1	1	TGGT1_239820-t26_1-p1	TGGT1_239820-t26_1-p1 [357-368]			transcript=TGGT1_239820-t26_1 | gene=TGGT1_239820 | organism=Toxoplasma_gondii_GT1 | gene_product=D-3-phosphoglycerate dehydrogenase [Source:UniProtKB/TrEMBL;Acc:A0A125YMY8] | transcript_product=D-3-phosphoglycerate dehydrogenase | location=TGGT1_chrVI:931789-940557(-) | protein_length=604 | sequence_SO=chromosome | SO=protein_coding_gene | is_pseudo=false	0	2001.19	12	1.457	1.6	1.108	0.805	1.172	1.287	0.891	1.311	0.85	0.988	0.54	0.68	0.15	-0.31	0.23	0.36	-0.17	0.39	-0.23	-0.02	0.565659	0.463378	0.479978	0.614232	0.480515	0.251055	0.825833	0.248572	0.562813	0.916095	0.933506
FALSE	High	LVDLEQEVELAQSPTHFIHVR	[K].LVDLEQEVELAQSPTHFIHVR.[S]	1xTMTpro [N-Term]; 1xPhospho [S13(99.5)]	1xTMTpro [N-Term]; 1xPhospho [S13(99.5); T15(0.5)]	8.59188e-07	5.34993e-05	1	1	1	TGGT1_313480-t26_1-p1	TGGT1_313480-t26_1-p1 [157-177]	TGGT1_313480-t26_1-p1 1xPhospho [S169(99.5); T171(0.5)]	TGGT1_313480-t26_1-p1 1xPhospho [S169(99.5)]	transcript=TGGT1_313480-t26_1 | gene=TGGT1_313480 | organism=Toxoplasma_gondii_GT1 | gene_product=hypothetical protein | transcript_product=hypothetical protein | location=TGGT1_chrXI:3385333-3400705(+) | protein_length=1381 | sequence_SO=chromosome | SO=protein_coding_gene | is_pseudo=false	0	2844.46	21	0.933	1.225	1.074	0.894	0.835	1.096	0.961	1.165	0.959	1.036	-0.1	0.29	0.1	-0.16	-0.26	0.13	-0.06	0.22	-0.06	0.05	0.860273	0.425117	0.868926	0.842978	0.402682	0.800202	0.757682	0.742232	0.916177	0.879239	0.981136
FALSE	High	LVDLSSQAEFEVVDSQK	[R].LVDLSSQAEFEVVDSQK.[S]	1xTMTpro [K17]; 1xTMTpro [N-Term]	1xTMTpro [K17]; 1xTMTpro [N-Term]	3.72008e-06	5.34993e-05	1	1	1	TGGT1_219540-t26_1-p1	TGGT1_219540-t26_1-p1 [829-845]			transcript=TGGT1_219540-t26_1 | gene=TGGT1_219540 | organism=Toxoplasma_gondii_GT1 | gene_product=Alanine--tRNA ligase [Source:UniProtKB/TrEMBL;Acc:S7WHV1] | transcript_product=cytosolic tRNA-Ala synthetase | location=TGGT1_chrXII:800723-814444(-) | protein_length=1280 | sequence_SO=chromosome | SO=protein_coding_gene | is_pseudo=false	0	2502.36	17	1.16	1.108	0.936	1.009	1.17	1.117	0.944	1.112	1.13	1.073	0.21	0.15	-0.09	0.01	0.23	0.16	-0.08	0.15	0.18	0.1	0.106349	0.143856	0.647438	0.304758	0.0829632	0.108344	0.674492	0.627733	0.294071	0.51163	0.8946
FALSE	High	LVDRPGLTEDEIEEIR	[R].LVDRPGLTEDEIEEIR.[E]	1xTMTpro [N-Term]; 1xPhospho [T8(100)]	1xTMTpro [N-Term]; 1xPhospho [T8(100)]	3.3018e-05	5.34993e-05	1	1	1	TGGT1_250340-t26_1-p1	TGGT1_250340-t26_1-p1 [17-32]	TGGT1_250340-t26_1-p1 1xPhospho [T24(100)]	TGGT1_250340-t26_1-p1 1xPhospho [T24(100)]	transcript=TGGT1_250340-t26_1 | gene=TGGT1_250340 | organism=Toxoplasma_gondii_GT1 | gene_product=Centrin 2 [Source:UniProtKB/TrEMBL;Acc:S7V0C6] | transcript_product=centrin 2 | location=TGGT1_chrXII:4993747-4995535(-) | protein_length=170 | sequence_SO=chromosome | SO=protein_coding_gene | is_pseudo=false	0	2268.14	16	1.276	1.039	1.254	0.933	1.191	0.97	1.171	0.999	1.139	1.097	0.35	0.06	0.33	-0.1	0.25	-0.04	0.23	0	0.19	0.13	0.453989	0.808177	0.247508	0.299072	0.501739	0.877896	0.223805	0.992362	0.0408718	0.645752	0.915936
FALSE	High	LTSGSQDSEKAETGENGEKEEAAADR	[R].LTSGSQDSEKAETGENGEKEEAAADR.[G]	2xTMTpro [K10; K19]; 1xTMTpro [N-Term]; 2xPhospho [S8(100); S/T]	2xTMTpro [K10; K19]; 1xTMTpro [N-Term]; 2xPhospho [T2(0.4); S3(49.8); S5(49.8); S8(100); T13(0)]	2.88515e-06	5.34993e-05	1	1	1	TGGT1_307010-t26_1-p1	TGGT1_307010-t26_1-p1 [1034-1059]	TGGT1_307010-t26_1-p1 2xPhospho [T1035(0.4); S1036(49.8); S1038(49.8); S1041(100); T1046(0)]	TGGT1_307010-t26_1-p1 2xPhospho [S1041(100); S/T]	transcript=TGGT1_307010-t26_1 | gene=TGGT1_307010 | organism=Toxoplasma_gondii_GT1 | gene_product=Histone lysine demethylase JMJC1/KDM5D/JARID1D [Source:UniProtKB/TrEMBL;Acc:S7USY7] | transcript_product=histone lysine demethylase JMJC1/KDM5D/JARID1D | location=TGGT1_chrXI:103598-109319(+) | protein_length=1298 | sequence_SO=chromosome | SO=protein_coding_gene | is_pseudo=false	2	3781.76	26	0.99	0.694	1.021	1.045	1.035	0.726	1.067	0.762	0.701	0.825	-0.01	-0.53	0.03	0.06	0.05	-0.46	0.09	-0.39	-0.51	-0.28	0.940937	0.294334	0.866838	0.690703	0.382498	0.18919	0.13729	0.0506396	0.317279	0.479911	0.992953
FALSE	High	LVSEEMHAR	[K].LVSEEMHAR.[R]	1xTMTpro [N-Term]; 1xPhospho [S3(100)]	1xTMTpro [N-Term]; 1xPhospho [S3(100)]	0.000114009	5.34993e-05	1	1	4	TGGT1_244420-t26_1-p1	TGGT1_244420-t26_1-p1 [279-287]	TGGT1_244420-t26_1-p1 1xPhospho [S281(100)]	TGGT1_244420-t26_1-p1 1xPhospho [S281(100)]	transcript=TGGT1_244420-t26_1 | gene=TGGT1_244420 | organism=Toxoplasma_gondii_GT1 | gene_product=hypothetical protein | transcript_product=hypothetical protein | location=TGGT1_chrVI:3167618-3168595(-) | protein_length=325 | sequence_SO=chromosome | SO=protein_coding_gene | is_pseudo=false	0	1455.7	9
FALSE	High	LVSGVVATQGEAR	[R].LVSGVVATQGEAR.[I]	1xTMTpro [N-Term]; 1xPhospho [S3(100)]	1xTMTpro [N-Term]; 1xPhospho [S3(100); T8(0)]	2.12283e-07	5.34993e-05	1	1	28	TGGT1_231630-t26_1-p1	TGGT1_231630-t26_1-p1 [30-42]	TGGT1_231630-t26_1-p1 1xPhospho [S32(100); T37(0)]	TGGT1_231630-t26_1-p1 1xPhospho [S32(100)]	transcript=TGGT1_231630-t26_1 | gene=TGGT1_231630 | organism=Toxoplasma_gondii_GT1 | gene_product=Alveolin domain containing intermediate filament IMC4 [Source:UniProtKB/TrEMBL;Acc:A0A125YPY9] | transcript_product=alveolin domain containing intermediate filament IMC4 | location=TGGT1_chrVIII:1508307-1510463(-) | protein_length=452 | sequence_SO=chromosome | SO=protein_coding_gene | is_pseudo=false	0	1670.88	13	0.954	0.81	0.912	1.038	0.991	0.841	0.947	0.927	0.857	0.972	-0.07	-0.3	-0.13	0.05	-0.01	-0.25	-0.08	-0.11	-0.22	-0.04	0.707137	0.247712	0.181331	0.087051	0.933697	0.309433	0.24178	0.609987	0.139783	0.735972	0.957811
FALSE	High	IVSKPTHSLGESSK	[K].IVSKPTHSLGESSK.[L]	2xTMTpro [K4; K14]; 1xTMTpro [N-Term]; 1xPhospho [S12(99.7)]	2xTMTpro [K4; K14]; 1xTMTpro [N-Term]; 1xPhospho [S3(0); T6(0); S8(0); S12(99.7); S13(0.4)]	0.000220022	5.34993e-05	1	1	3	TGGT1_245640-t26_1-p1	TGGT1_245640-t26_1-p1 [104-117]	TGGT1_245640-t26_1-p1 1xPhospho [S106(0); T109(0); S111(0); S115(99.7); S116(0.4)]	TGGT1_245640-t26_1-p1 1xPhospho [S115(99.7)]	transcript=TGGT1_245640-t26_1 | gene=TGGT1_245640 | organism=Toxoplasma_gondii_GT1 | gene_product=hypothetical protein | transcript_product=hypothetical protein | location=TGGT1_chrXII:2379517-2382152(-) | protein_length=416 | sequence_SO=chromosome | SO=protein_coding_gene | is_pseudo=false	0	2462.38	14	1.047	1.352	1.105	0.765	0.801	1.035	0.845	1.212	1.94	2.766	0.07	0.44	0.14	-0.39	-0.32	0.05	-0.24	0.28	0.96	1.47	0.533171	0.491023	0.637906	0.562071	0.660708	0.48146	0.503272	0.411844	0.466242	0.356659	0.927534
FALSE	High	MAQASTSK	[R].MAQASTSK.[S]	1xTMTpro [K8]; 1xTMTpro [N-Term]; 1xPhospho [S7(100)]	1xTMTpro [K8]; 1xTMTpro [N-Term]; 1xPhospho [S5(0); T6(0); S7(100)]	2.49134e-05	5.34993e-05	1	1	4	TGGT1_283710-t26_1-p1	TGGT1_283710-t26_1-p1 [328-335]	TGGT1_283710-t26_1-p1 1xPhospho [S332(0); T333(0); S334(100)]	TGGT1_283710-t26_1-p1 1xPhospho [S334(100)]	transcript=TGGT1_283710-t26_1 | gene=TGGT1_283710 | organism=Toxoplasma_gondii_GT1 | gene_product=TLC domain-containing protein [Source:UniProtKB/TrEMBL;Acc:A0A125YW31] | transcript_product=longevity-assurance protein (LAG1) domain-containing protein | location=TGGT1_chrV:2855033-2858762(-) | protein_length=342 | sequence_SO=chromosome | SO=protein_coding_gene | is_pseudo=false	0	1511.78	8	1.066	1.102	0.95	1.051	1.12	1.158	0.998	1.051	1.006	0.817	0.09	0.14	-0.07	0.07	0.16	0.21	0	0.07	0.01	-0.29	0.447394	0.206632	0.557259	0.55928	0.501341	0.358047	0.495605	0.398194	0.940863	0.110016	0.915414
FALSE	High	MAQASTSK	[R].MAQASTSK.[S]	1xOxidation [M1]; 1xTMTpro [K8]; 1xTMTpro [N-Term]; 1xPhospho [S7(100)]	1xOxidation [M1]; 1xTMTpro [K8]; 1xTMTpro [N-Term]; 1xPhospho [S5(0); T6(0); S7(100)]	1.79222e-05	5.34993e-05	1	1	5	TGGT1_283710-t26_1-p1	TGGT1_283710-t26_1-p1 [328-335]	TGGT1_283710-t26_1-p1 1xPhospho [S332(0); T333(0); S334(100)]	TGGT1_283710-t26_1-p1 1xPhospho [S334(100)]	transcript=TGGT1_283710-t26_1 | gene=TGGT1_283710 | organism=Toxoplasma_gondii_GT1 | gene_product=TLC domain-containing protein [Source:UniProtKB/TrEMBL;Acc:A0A125YW31] | transcript_product=longevity-assurance protein (LAG1) domain-containing protein | location=TGGT1_chrV:2855033-2858762(-) | protein_length=342 | sequence_SO=chromosome | SO=protein_coding_gene | is_pseudo=false	0	1527.77	8	0.909	0.913	0.671	1.181	1.073	1.078	0.792	1.012	0.747	0.824	-0.14	-0.13	-0.58	0.24	0.1	0.11	-0.34	0.02	-0.42	-0.28	0.394854	0.229333	0.0519002	0.523555	0.638416	0.696171	0.356639	0.935631	0.312309	0.212902	0.910222
FALSE	High	MAQASTSKSDSK	[R].MAQASTSKSDSK.[K]	2xTMTpro [K8; K12]; 1xTMTpro [N-Term]; 1xPhospho [S11(100)]	2xTMTpro [K8; K12]; 1xTMTpro [N-Term]; 1xPhospho [S5(0); T6(0); S7(0); S9(0); S11(100)]	4.92195e-08	5.34993e-05	1	1	6	TGGT1_283710-t26_1-p1	TGGT1_283710-t26_1-p1 [328-339]	TGGT1_283710-t26_1-p1 1xPhospho [S332(0); T333(0); S334(0); S336(0); S338(100)]	TGGT1_283710-t26_1-p1 1xPhospho [S338(100)]	transcript=TGGT1_283710-t26_1 | gene=TGGT1_283710 | organism=Toxoplasma_gondii_GT1 | gene_product=TLC domain-containing protein [Source:UniProtKB/TrEMBL;Acc:A0A125YW31] | transcript_product=longevity-assurance protein (LAG1) domain-containing protein | location=TGGT1_chrV:2855033-2858762(-) | protein_length=342 | sequence_SO=chromosome | SO=protein_coding_gene | is_pseudo=false	1	2233.17	12	1.163	0.982	1.137	0.995	1.157	0.977	1.131	0.982	1.064	1.188	0.22	-0.03	0.18	-0.01	0.21	-0.03	0.18	-0.03	0.09	0.25	0.253384	0.671819	0.70943	0.984317	0.512029	0.91852	0.22683	0.874923	0.545653	0.245151	0.900211
FALSE	High	MAQASTSKSDSK	[R].MAQASTSKSDSK.[K]	1xOxidation [M1]; 2xTMTpro [K8; K12]; 1xTMTpro [N-Term]; 1xPhospho [S7(99.7)]	1xOxidation [M1]; 2xTMTpro [K8; K12]; 1xTMTpro [N-Term]; 1xPhospho [S5(0); T6(0.1); S7(99.7); S9(0.1); S11(0)]	6.79702e-07	5.34993e-05	1	1	4	TGGT1_283710-t26_1-p1	TGGT1_283710-t26_1-p1 [328-339]	TGGT1_283710-t26_1-p1 1xPhospho [S332(0); T333(0.1); S334(99.7); S336(0.1); S338(0)]	TGGT1_283710-t26_1-p1 1xPhospho [S334(99.7)]	transcript=TGGT1_283710-t26_1 | gene=TGGT1_283710 | organism=Toxoplasma_gondii_GT1 | gene_product=TLC domain-containing protein [Source:UniProtKB/TrEMBL;Acc:A0A125YW31] | transcript_product=longevity-assurance protein (LAG1) domain-containing protein | location=TGGT1_chrV:2855033-2858762(-) | protein_length=342 | sequence_SO=chromosome | SO=protein_coding_gene | is_pseudo=false	1	2249.17	12	1.261	1.074	0.968	1.109	1.399	1.191	1.074	1.03	1.048	1.26	0.33	0.1	-0.05	0.15	0.48	0.25	0.1	0.04	0.07	0.33	0.420752	0.837979	0.932394	0.825576	0.325852	0.319788	0.462525	0.900411	0.811551	0.252159	0.911502
FALSE	High	MAQASTSKSDSK	[R].MAQASTSKSDSK.[K]	1xOxidation [M1]; 2xTMTpro [K8; K12]; 1xTMTpro [N-Term]; 2xPhospho [S7(100); S11(100)]	1xOxidation [M1]; 2xTMTpro [K8; K12]; 1xTMTpro [N-Term]; 2xPhospho [S5(0); T6(0); S7(100); S9(0); S11(100)]	0.000259367	5.34993e-05	1	1	1	TGGT1_283710-t26_1-p1	TGGT1_283710-t26_1-p1 [328-339]	TGGT1_283710-t26_1-p1 2xPhospho [S332(0); T333(0); S334(100); S336(0); S338(100)]	TGGT1_283710-t26_1-p1 2xPhospho [S334(100); S338(100)]	transcript=TGGT1_283710-t26_1 | gene=TGGT1_283710 | organism=Toxoplasma_gondii_GT1 | gene_product=TLC domain-containing protein [Source:UniProtKB/TrEMBL;Acc:A0A125YW31] | transcript_product=longevity-assurance protein (LAG1) domain-containing protein | location=TGGT1_chrV:2855033-2858762(-) | protein_length=342 | sequence_SO=chromosome | SO=protein_coding_gene | is_pseudo=false	1	2329.13	12
FALSE	High	MASEAAAAR	[R].MASEAAAAR.[R]	1xTMTpro [N-Term]; 1xPhospho [S3(100)]	1xTMTpro [N-Term]; 1xPhospho [S3(100)]	0.000371221	5.34993e-05	1	1	4	TGGT1_289100-t26_1-p1	TGGT1_289100-t26_1-p1 [165-173]	TGGT1_289100-t26_1-p1 1xPhospho [S167(100)]	TGGT1_289100-t26_1-p1 1xPhospho [S167(100)]	transcript=TGGT1_289100-t26_1 | gene=TGGT1_289100 | organism=Toxoplasma_gondii_GT1 | gene_product=hypothetical protein | transcript_product=hypothetical protein | location=TGGT1_chrIX:2793313-2802752(+) | protein_length=698 | sequence_SO=chromosome | SO=protein_coding_gene | is_pseudo=false	0	1261.59	9	1.126	1.392	1.361	0.874	0.984	1.216	1.189	3.307	5.697	4.269	0.17	0.48	0.44	-0.19	-0.02	0.28	0.25	1.73	2.51	2.09	0.57909	0.52054	0.500589	0.362237	0.956138	0.733485	0.737364	0.113617	0.0694293	0.12028	0.935041
FALSE	High	MASGSEANEYGLFEVSR	[R].MASGSEANEYGLFEVSR.[H]	1xTMTpro [N-Term]; 1xPhospho [S3(100)]	1xTMTpro [N-Term]; 1xPhospho [S3(100); S5(0); Y10(0); S16(0)]	1.40857e-08	5.34993e-05	1	1	1	TGGT1_268680-t26_1-p1	TGGT1_268680-t26_1-p1 [509-525]	TGGT1_268680-t26_1-p1 1xPhospho [S511(100); S513(0); Y518(0); S524(0)]	TGGT1_268680-t26_1-p1 1xPhospho [S511(100)]	transcript=TGGT1_268680-t26_1 | gene=TGGT1_268680 | organism=Toxoplasma_gondii_GT1 | gene_product=hypothetical protein | transcript_product=hypothetical protein | location=TGGT1_chrVIII:6366432-6369098(-) | protein_length=888 | sequence_SO=chromosome | SO=protein_coding_gene | is_pseudo=false	0	2231	17	0.992	0.855	1.063	1.132	1.123	0.968	1.203	1.351	1.171	1.214	-0.01	-0.23	0.09	0.18	0.17	-0.05	0.27	0.43	0.23	0.28	0.932565	0.283461	0.208382	0.438943	0.629358	0.884063	0.373087	0.391494	0.234919	0.490578	0.990791
FALSE	High	MASGSEANEYGLFEVSR	[R].MASGSEANEYGLFEVSR.[H]	1xOxidation [M1]; 1xTMTpro [N-Term]; 1xPhospho [S3(100)]	1xOxidation [M1]; 1xTMTpro [N-Term]; 1xPhospho [S3(100); S5(0); Y10(0); S16(0)]	9.7848e-08	5.34993e-05	1	1	1	TGGT1_268680-t26_1-p1	TGGT1_268680-t26_1-p1 [509-525]	TGGT1_268680-t26_1-p1 1xPhospho [S511(100); S513(0); Y518(0); S524(0)]	TGGT1_268680-t26_1-p1 1xPhospho [S511(100)]	transcript=TGGT1_268680-t26_1 | gene=TGGT1_268680 | organism=Toxoplasma_gondii_GT1 | gene_product=hypothetical protein | transcript_product=hypothetical protein | location=TGGT1_chrVIII:6366432-6369098(-) | protein_length=888 | sequence_SO=chromosome | SO=protein_coding_gene | is_pseudo=false	0	2247	17
FALSE	High	MASGSVEAEIDEQAR	[R].MASGSVEAEIDEQAR.[Q]	1xOxidation [M1]; 1xTMTpro [N-Term]; 1xPhospho [S3(100)]	1xOxidation [M1]; 1xTMTpro [N-Term]; 1xPhospho [S3(100); S5(0)]	1.24392e-05	5.34993e-05	1	1	11	TGGT1_213030-t26_1-p1	TGGT1_213030-t26_1-p1 [180-194]	TGGT1_213030-t26_1-p1 1xPhospho [S182(100); S184(0)]	TGGT1_213030-t26_1-p1 1xPhospho [S182(100)]	transcript=TGGT1_213030-t26_1 | gene=TGGT1_213030 | organism=Toxoplasma_gondii_GT1 | gene_product=Clathrin light chain [Source:UniProtKB/TrEMBL;Acc:S7UPA7] | transcript_product=hypothetical protein | location=TGGT1_chrV:673145-674534(+) | protein_length=324 | sequence_SO=chromosome | SO=protein_coding_gene | is_pseudo=false	0	1992.89	15
FALSE	High	MASVPVNGVTTVPVEGGPSR	[R].MASVPVNGVTTVPVEGGPSR.[K]	1xTMTpro [N-Term]; 1xPhospho [S3(100)]	1xTMTpro [N-Term]; 1xPhospho [S3(100); T10(0); T11(0); S19(0)]	2.52117e-05	5.34993e-05	1	1	2	TGGT1_311230-t26_1-p1	TGGT1_311230-t26_1-p1 [3250-3269]	TGGT1_311230-t26_1-p1 1xPhospho [S3252(100); T3259(0); T3260(0); S3268(0)]	TGGT1_311230-t26_1-p1 1xPhospho [S3252(100)]	transcript=TGGT1_311230-t26_1 | gene=TGGT1_311230 | organism=Toxoplasma_gondii_GT1 | gene_product=hypothetical protein | transcript_product=hypothetical protein | location=TGGT1_chrXI:1844321-1862670(+) | protein_length=4603 | sequence_SO=chromosome | SO=protein_coding_gene | is_pseudo=false	0	2338.18	20	0.963	0.793	0.869	1.317	1.268	1.045	1.144	1.037	1.124	1.268	-0.05	-0.33	-0.2	0.4	0.34	0.06	0.19	0.05	0.17	0.34	0.69141	0.378878	0.444565	0.257081	0.428812	0.898563	0.669553	0.860982	0.574128	0.543423	0.95308
FALSE	High	MASVPVNGVTTVPVEGGPSR	[R].MASVPVNGVTTVPVEGGPSR.[K]	1xOxidation [M1]; 1xTMTpro [N-Term]; 1xPhospho [S3(100)]	1xOxidation [M1]; 1xTMTpro [N-Term]; 1xPhospho [S3(100); T10(0); T11(0); S19(0)]	2.40098e-07	5.34993e-05	1	1	3	TGGT1_311230-t26_1-p1	TGGT1_311230-t26_1-p1 [3250-3269]	TGGT1_311230-t26_1-p1 1xPhospho [S3252(100); T3259(0); T3260(0); S3268(0)]	TGGT1_311230-t26_1-p1 1xPhospho [S3252(100)]	transcript=TGGT1_311230-t26_1 | gene=TGGT1_311230 | organism=Toxoplasma_gondii_GT1 | gene_product=hypothetical protein | transcript_product=hypothetical protein | location=TGGT1_chrXI:1844321-1862670(+) | protein_length=4603 | sequence_SO=chromosome | SO=protein_coding_gene | is_pseudo=false	0	2354.17	20	0.968	1.142	1.126	1.095	1.06	1.251	1.232	1.28	1.521	1.332	-0.05	0.19	0.17	0.13	0.08	0.32	0.3	0.36	0.61	0.41	0.798912	0.0818281	0.250622	0.320621	0.444244	0.0925726	0.00247453	0.0838367	0.0156402	0.213905	0.973229
FALSE	High	MATAAVLPPEAR	[R].MATAAVLPPEAR.[A]	1xTMTpro [N-Term]; 1xPhospho [T3(100)]	1xTMTpro [N-Term]; 1xPhospho [T3(100)]	9.2824e-09	5.34993e-05	1	1	5	TGGT1_259200B-t26_1-p1	TGGT1_259200B-t26_1-p1 [75-86]	TGGT1_259200B-t26_1-p1 1xPhospho [T77(100)]	TGGT1_259200B-t26_1-p1 1xPhospho [T77(100)]	transcript=TGGT1_259200B-t26_1 | gene=TGGT1_259200B | organism=Toxoplasma_gondii_GT1 | gene_product=Na+/H+ exchanger NHE1 [Source:UniProtKB/TrEMBL;Acc:S7WEL3] | transcript_product=Na+/H+ exchanger NHE1 | location=TGGT1_chrVIIb:2842786-2849857(-) | protein_length=1450 | sequence_SO=chromosome | SO=protein_coding_gene | is_pseudo=false	0	1610.83	12	1.601	1.532	1.575	1.097	1.755	1.681	1.727	1.563	1.543	1.554	0.68	0.62	0.66	0.13	0.81	0.75	0.79	0.64	0.63	0.64	0.266355	0.065865	0.177858	0.0480585	0.21961	0.0457179	0.141296	0.0163475	0.0337731	0.177207	0.900211
FALSE	High	MALPSPTSVSFPHGGR	[R].MALPSPTSVSFPHGGR.[T]	1xOxidation [M1]; 1xTMTpro [N-Term]; 1xPhospho [S5(100)]	1xOxidation [M1]; 1xTMTpro [N-Term]; 1xPhospho [S5(100); T7(0); S8(0); S10(0)]	3.11128e-06	5.34993e-05	1	1	2	TGGT1_297120-t26_1-p1	TGGT1_297120-t26_1-p1 [691-706]	TGGT1_297120-t26_1-p1 1xPhospho [S695(100); T697(0); S698(0); S700(0)]	TGGT1_297120-t26_1-p1 1xPhospho [S695(100)]	transcript=TGGT1_297120-t26_1 | gene=TGGT1_297120 | organism=Toxoplasma_gondii_GT1 | gene_product=hypothetical protein | transcript_product=hypothetical protein | location=TGGT1_chrII:1525947-1530326(+) | protein_length=760 | sequence_SO=chromosome | SO=protein_coding_gene | is_pseudo=false	0	2040.99	16	1.03	1.822	1.371	0.964	0.993	1.757	1.322	1.256	1.871	1.592	0.04	0.87	0.46	-0.05	-0.01	0.81	0.4	0.33	0.9	0.67	0.932374	0.30003	0.461984	0.910111	0.826943	0.0553067	0.053566	0.258536	0.134782	0.0332615	0.990791
FALSE	High	MATAAVLPPEAR	[R].MATAAVLPPEAR.[A]	1xOxidation [M1]; 1xTMTpro [N-Term]; 1xPhospho [T3(100)]	1xOxidation [M1]; 1xTMTpro [N-Term]; 1xPhospho [T3(100)]	8.31437e-08	5.34993e-05	1	1	4	TGGT1_259200B-t26_1-p1	TGGT1_259200B-t26_1-p1 [75-86]	TGGT1_259200B-t26_1-p1 1xPhospho [T77(100)]	TGGT1_259200B-t26_1-p1 1xPhospho [T77(100)]	transcript=TGGT1_259200B-t26_1 | gene=TGGT1_259200B | organism=Toxoplasma_gondii_GT1 | gene_product=Na+/H+ exchanger NHE1 [Source:UniProtKB/TrEMBL;Acc:S7WEL3] | transcript_product=Na+/H+ exchanger NHE1 | location=TGGT1_chrVIIb:2842786-2849857(-) | protein_length=1450 | sequence_SO=chromosome | SO=protein_coding_gene | is_pseudo=false	0	1626.82	12
FALSE	High	MATTPWSILNAPQR	[R].MATTPWSILNAPQR.[L]	1xTMTpro [N-Term]; 1xPhospho [T3(99.7)]	1xTMTpro [N-Term]; 1xPhospho [T3(99.7); T4(0.3); S7(0)]	3.08666e-06	5.34993e-05	1	1	1	TGGT1_277870-t26_1-p1	TGGT1_277870-t26_1-p1 [509-522]	TGGT1_277870-t26_1-p1 1xPhospho [T511(99.7); T512(0.3); S515(0)]	TGGT1_277870-t26_1-p1 1xPhospho [T511(99.7)]	transcript=TGGT1_277870-t26_1 | gene=TGGT1_277870 | organism=Toxoplasma_gondii_GT1 | gene_product=hypothetical protein | transcript_product=hypothetical protein | location=TGGT1_chrXII:6373155-6378249(+) | protein_length=524 | sequence_SO=chromosome | SO=protein_coding_gene | is_pseudo=false	0	1969.99	14
FALSE	High	MATTPWSILNAPQR	[R].MATTPWSILNAPQR.[L]	1xOxidation [M1]; 1xTMTpro [N-Term]; 1xPhospho [T3(100)]	1xOxidation [M1]; 1xTMTpro [N-Term]; 1xPhospho [T3(100); T4(0); S7(0)]	0.000141637	5.34993e-05	1	1	2	TGGT1_277870-t26_1-p1	TGGT1_277870-t26_1-p1 [509-522]	TGGT1_277870-t26_1-p1 1xPhospho [T511(100); T512(0); S515(0)]	TGGT1_277870-t26_1-p1 1xPhospho [T511(100)]	transcript=TGGT1_277870-t26_1 | gene=TGGT1_277870 | organism=Toxoplasma_gondii_GT1 | gene_product=hypothetical protein | transcript_product=hypothetical protein | location=TGGT1_chrXII:6373155-6378249(+) | protein_length=524 | sequence_SO=chromosome | SO=protein_coding_gene | is_pseudo=false	0	1985.98	14	1.019	1.632	1.4	1.198	1.22	1.954	1.677	1.749	2.204	2.07	0.03	0.71	0.49	0.26	0.29	0.97	0.75	0.81	1.14	1.05	0.970097	0.137409	0.346734	0.148087	0.678043	0.061231	0.192519	0.158067	0.0373558	0.00870965	0.995188
FALSE	High	MAVTLTEQSHPTSGK	[R].MAVTLTEQSHPTSGK.[N]	1xTMTpro [K15]; 1xTMTpro [N-Term]; 1xPhospho [T4(100)]	1xTMTpro [K15]; 1xTMTpro [N-Term]; 1xPhospho [T4(100); T6(0); S9(0); T12(0); S13(0)]	7.80821e-11	5.34993e-05	1	1	7	TGGT1_278660-t26_1-p1	TGGT1_278660-t26_1-p1 [163-177]	TGGT1_278660-t26_1-p1 1xPhospho [T166(100); T168(0); S171(0); T174(0); S175(0)]	TGGT1_278660-t26_1-p1 1xPhospho [T166(100)]	transcript=TGGT1_278660-t26_1 | gene=TGGT1_278660 | organism=Toxoplasma_gondii_GT1 | gene_product=Cation_ATPase_N domain-containing protein [Source:UniProtKB/TrEMBL;Acc:S7UZZ0] | transcript_product=putative P-type ATPase4 | location=TGGT1_chrXII:5863040-5875230(+) | protein_length=1338 | sequence_SO=chromosome | SO=protein_coding_gene | is_pseudo=false	0	2275.16	15	1.263	1.587	1.44	0.906	1.145	1.439	1.306	1.066	1.24	1.04	0.34	0.67	0.53	-0.14	0.19	0.52	0.38	0.09	0.31	0.06	0.275053	0.265401	0.345336	0.604375	0.678942	0.480064	0.591595	0.487628	0.283615	0.769157	0.904439
FALSE	High	MAVTLTEQSHPTSGK	[R].MAVTLTEQSHPTSGK.[N]	1xOxidation [M1]; 1xTMTpro [K15]; 1xTMTpro [N-Term]; 1xPhospho [T4(100)]	1xOxidation [M1]; 1xTMTpro [K15]; 1xTMTpro [N-Term]; 1xPhospho [T4(100); T6(0); S9(0); T12(0); S13(0)]	3.47382e-07	5.34993e-05	1	1	5	TGGT1_278660-t26_1-p1	TGGT1_278660-t26_1-p1 [163-177]	TGGT1_278660-t26_1-p1 1xPhospho [T166(100); T168(0); S171(0); T174(0); S175(0)]	TGGT1_278660-t26_1-p1 1xPhospho [T166(100)]	transcript=TGGT1_278660-t26_1 | gene=TGGT1_278660 | organism=Toxoplasma_gondii_GT1 | gene_product=Cation_ATPase_N domain-containing protein [Source:UniProtKB/TrEMBL;Acc:S7UZZ0] | transcript_product=putative P-type ATPase4 | location=TGGT1_chrXII:5863040-5875230(+) | protein_length=1338 | sequence_SO=chromosome | SO=protein_coding_gene | is_pseudo=false	0	2291.16	15	1.199	1.953	1.728	0.942	1.129	1.839	1.627	1.249	1.672	1.218	0.26	0.97	0.79	-0.09	0.17	0.88	0.7	0.32	0.74	0.28	0.543001	0.325467	0.392664	0.08961	0.652248	0.345199	0.421453	0.375803	0.155703	0.486606	0.929817
FALSE	High	MAVTLTEQSHPTSGK	[R].MAVTLTEQSHPTSGK.[N]	1xTMTpro [K15]; 1xTMTpro [N-Term]; 2xPhospho [T4(100); T12(100)]	1xTMTpro [K15]; 1xTMTpro [N-Term]; 2xPhospho [T4(100); T6(0); S9(0); T12(100); S13(0)]	0.00030087	5.34993e-05	1	1	3	TGGT1_278660-t26_1-p1	TGGT1_278660-t26_1-p1 [163-177]	TGGT1_278660-t26_1-p1 2xPhospho [T166(100); T168(0); S171(0); T174(100); S175(0)]	TGGT1_278660-t26_1-p1 2xPhospho [T166(100); T174(100)]	transcript=TGGT1_278660-t26_1 | gene=TGGT1_278660 | organism=Toxoplasma_gondii_GT1 | gene_product=Cation_ATPase_N domain-containing protein [Source:UniProtKB/TrEMBL;Acc:S7UZZ0] | transcript_product=putative P-type ATPase4 | location=TGGT1_chrXII:5863040-5875230(+) | protein_length=1338 | sequence_SO=chromosome | SO=protein_coding_gene | is_pseudo=false	0	2355.13	15	3.156	5.784	3.787	8.863	14.602	22.361	15.77	23.716	27.856	21.484	1.66	2.53	1.92	3.15	3.87	4.48	3.98	4.57	4.8	4.43
FALSE	High	MCENGDRSDAEHR	[R].MCENGDRSDAEHR.[R]	1xMethylthio [C2]; 1xTMTpro [N-Term]; 1xPhospho [S8(100)]	1xMethylthio [C2]; 1xTMTpro [N-Term]; 1xPhospho [S8(100)]	1.07399e-05	5.34993e-05	1	1	7	TGGT1_257470-t26_1-p1	TGGT1_257470-t26_1-p1 [2416-2428]	TGGT1_257470-t26_1-p1 1xMethylthio [C2417]; 1xPhospho [S2423(100)]	TGGT1_257470-t26_1-p1 1xMethylthio [C2417]; 1xPhospho [S2423(100)]	transcript=TGGT1_257470-t26_1 | gene=TGGT1_257470 | organism=Toxoplasma_gondii_GT1 | gene_product=Myosin motor domain-containing protein [Source:UniProtKB/TrEMBL;Acc:S7WF44] | transcript_product=myosin J | location=TGGT1_chrVIIb:3962778-3973847(+) | protein_length=2532 | sequence_SO=chromosome | SO=protein_coding_gene | is_pseudo=false	1	1949.76	13	0.905	0.81	0.821	1.126	1.019	0.912	0.924	0.933	0.962	0.908	-0.14	-0.3	-0.28	0.17	0.03	-0.13	-0.11	-0.1	-0.06	-0.14	0.305107	0.35207	0.414249	0.284811	0.169421	0.427353	0.55323	0.470124	0.626561	0.402246	0.904778
FALSE	High	MCTSPVHNQTR	[R].MCTSPVHNQTR.[Q]	1xMethylthio [C2]; 1xTMTpro [N-Term]; 1xPhospho [T/S]	1xMethylthio [C2]; 1xTMTpro [N-Term]; 1xPhospho [T3(50); S4(50); T10(0)]	0.000334244	5.34993e-05	1	1	1	TGGT1_288940-t26_1-p1	TGGT1_288940-t26_1-p1 [5069-5079]	TGGT1_288940-t26_1-p1 1xMethylthio [C5070]	TGGT1_288940-t26_1-p1 1xMethylthio [C5070]	transcript=TGGT1_288940-t26_1 | gene=TGGT1_288940 | organism=Toxoplasma_gondii_GT1 | gene_product=hypothetical protein | transcript_product=hypothetical protein | location=TGGT1_chrIX:2646043-2667727(+) | protein_length=6073 | sequence_SO=chromosome | SO=protein_coding_gene | is_pseudo=false	0	1703.74	11
FALSE	High	MDDDAIGGEEGGNGESR	[K].MDDDAIGGEEGGNGESR.[G]	1xOxidation [M1]; 1xTMTpro [N-Term]	1xOxidation [M1]; 1xTMTpro [N-Term]	1.49504e-08	5.34993e-05	1	1	2	TGGT1_247460-t26_1-p1	TGGT1_247460-t26_1-p1 [292-308]			transcript=TGGT1_247460-t26_1 | gene=TGGT1_247460 | organism=Toxoplasma_gondii_GT1 | gene_product=Proliferating cell nuclear antigen [Source:UniProtKB/TrEMBL;Acc:A0A125YTT0] | transcript_product=proliferating cell nuclear antigen PCNA1 | location=TGGT1_chrXII:3286520-3289072(-) | protein_length=317 | sequence_SO=chromosome | SO=protein_coding_gene | is_pseudo=false	0	2028.87	17	1.329	1.023	1.185	0.958	1.274	0.98	1.136	1.037	1.208	0.784	0.41	0.03	0.25	-0.06	0.35	-0.03	0.18	0.05	0.27	-0.35	0.524308	0.911514	0.219816	0.680715	0.642188	0.848828	0.525979	0.94116	0.692747	0.0373578	0.925931
FALSE	High	MDDDDNPENDVDEEER	[K].MDDDDNPENDVDEEER.[S]	1xTMTpro [N-Term]	1xTMTpro [N-Term]	2.97828e-06	5.34993e-05	1	1	1	TGGT1_288040-t26_1-p1	TGGT1_288040-t26_1-p1 [1197-1212]			transcript=TGGT1_288040-t26_1 | gene=TGGT1_288040 | organism=Toxoplasma_gondii_GT1 | gene_product=hypothetical protein | transcript_product=hypothetical protein | location=TGGT1_chrIX:2123272-2134120(-) | protein_length=1287 | sequence_SO=chromosome | SO=protein_coding_gene | is_pseudo=false	0	2240.91	16
FALSE	High	MDDSDDDEWR	[R].MDDSDDDEWR.[R]	1xTMTpro [N-Term]	1xTMTpro [N-Term]	7.93579e-07	5.34993e-05	1	1	2	TGGT1_315270-t26_1-p1	TGGT1_315270-t26_1-p1 [62-71]			transcript=TGGT1_315270-t26_1 | gene=TGGT1_315270 | organism=Toxoplasma_gondii_GT1 | gene_product=hypothetical protein | transcript_product=hypothetical protein | location=TGGT1_chrXI:4558433-4565813(-) | protein_length=780 | sequence_SO=chromosome | SO=protein_coding_gene | is_pseudo=false	0	1587.66	10	0.971	1.168	1.001	0.922	0.895	1.077	0.923	0.982	0.959	0.96	-0.04	0.22	0	-0.12	-0.16	0.11	-0.12	-0.03	-0.06	-0.06	0.569349	0.542592	0.99678	0.820742	0.72919	0.601375	0.610961	0.950025	0.86725	0.463129	0.934025
FALSE	High	MDDSDDDEWR	[R].MDDSDDDEWR.[R]	1xTMTpro [N-Term]; 1xPhospho [S4(100)]	1xTMTpro [N-Term]; 1xPhospho [S4(100)]	2.34739e-05	5.34993e-05	1	1	12	TGGT1_315270-t26_1-p1	TGGT1_315270-t26_1-p1 [62-71]	TGGT1_315270-t26_1-p1 1xPhospho [S65(100)]	TGGT1_315270-t26_1-p1 1xPhospho [S65(100)]	transcript=TGGT1_315270-t26_1 | gene=TGGT1_315270 | organism=Toxoplasma_gondii_GT1 | gene_product=hypothetical protein | transcript_product=hypothetical protein | location=TGGT1_chrXI:4558433-4565813(-) | protein_length=780 | sequence_SO=chromosome | SO=protein_coding_gene | is_pseudo=false	0	1667.62	10	0.781	0.883	0.842	1.18	0.921	1.042	0.993	1.09	0.884	0.96	-0.36	-0.18	-0.25	0.24	-0.12	0.06	-0.01	0.12	-0.18	-0.06	0.163732	0.59506	0.580949	0.568223	0.661637	0.466504	0.766785	0.783113	0.201746	0.767998	0.895983
FALSE	High	MDDSDDDEWR	[R].MDDSDDDEWR.[R]	1xOxidation [M1]; 1xTMTpro [N-Term]; 1xPhospho [S4(100)]	1xOxidation [M1]; 1xTMTpro [N-Term]; 1xPhospho [S4(100)]	5.57173e-05	5.34993e-05	1	1	20	TGGT1_315270-t26_1-p1	TGGT1_315270-t26_1-p1 [62-71]	TGGT1_315270-t26_1-p1 1xPhospho [S65(100)]	TGGT1_315270-t26_1-p1 1xPhospho [S65(100)]	transcript=TGGT1_315270-t26_1 | gene=TGGT1_315270 | organism=Toxoplasma_gondii_GT1 | gene_product=hypothetical protein | transcript_product=hypothetical protein | location=TGGT1_chrXI:4558433-4565813(-) | protein_length=780 | sequence_SO=chromosome | SO=protein_coding_gene | is_pseudo=false	0	1683.62	10	1.018	1.014	0.945	0.994	1.011	1.008	0.939	1.02	0.956	0.963	0.03	0.02	-0.08	-0.01	0.02	0.01	-0.09	0.03	-0.07	-0.05	0.307488	0.922115	0.708444	0.963278	0.939278	0.411339	0.0615358	0.818346	0.564033	0.386322	0.904778
FALSE	High	MATLVATGEEKEPEDAEEEEERPQSK	[R].MATLVATGEEKEPEDAEEEEERPQSK.[K]	2xTMTpro [K11; K26]; 1xTMTpro [N-Term]; 1xPhospho [S25(100)]	2xTMTpro [K11; K26]; 1xTMTpro [N-Term]; 1xPhospho [T3(0); T7(0); S25(100)]	1.56803e-08	5.34993e-05	1	1	3	TGGT1_247000-t26_1-p1	TGGT1_247000-t26_1-p1 [110-135]	TGGT1_247000-t26_1-p1 1xPhospho [T112(0); T116(0); S134(100)]	TGGT1_247000-t26_1-p1 1xPhospho [S134(100)]	transcript=TGGT1_247000-t26_1 | gene=TGGT1_247000 | organism=Toxoplasma_gondii_GT1 | gene_product=Tetratricopeptide repeat-containing protein [Source:UniProtKB/TrEMBL;Acc:S7WH26] | transcript_product=tetratricopeptide repeat-containing protein | location=TGGT1_chrXII:3025928-3029976(+) | protein_length=887 | sequence_SO=chromosome | SO=protein_coding_gene | is_pseudo=false	1	3924.92	26	0.979	0.84	0.897	1.009	0.989	0.848	0.906	1.098	1.55	1.285	-0.03	-0.25	-0.16	0.01	-0.02	-0.24	-0.14	0.13	0.63	0.36	0.681557	0.517563	0.688827	0.962452	0.940075	0.715802	0.83075	0.29588	0.181322	0.000208917	0.952274
FALSE	High	MALPSPTSVSFPHGGR	[R].MALPSPTSVSFPHGGR.[T]	1xTMTpro [N-Term]; 1xPhospho [S5(100)]	1xTMTpro [N-Term]; 1xPhospho [S5(100); T7(0); S8(0); S10(0)]	1.3098e-05	5.34993e-05	1	1	1	TGGT1_297120-t26_1-p1	TGGT1_297120-t26_1-p1 [691-706]	TGGT1_297120-t26_1-p1 1xPhospho [S695(100); T697(0); S698(0); S700(0)]	TGGT1_297120-t26_1-p1 1xPhospho [S695(100)]	transcript=TGGT1_297120-t26_1 | gene=TGGT1_297120 | organism=Toxoplasma_gondii_GT1 | gene_product=hypothetical protein | transcript_product=hypothetical protein | location=TGGT1_chrII:1525947-1530326(+) | protein_length=760 | sequence_SO=chromosome | SO=protein_coding_gene | is_pseudo=false	0	2024.99	16	1.357	1.115	1.197	0.787	1.068	0.877	0.942	1.031	0.987	0.799	0.44	0.16	0.26	-0.35	0.09	-0.19	-0.09	0.04	-0.02	-0.32	0.48325	0.82248	0.720576	0.0215227	0.854618	0.785526	0.899409	0.805138	0.896895	0.612125	0.919786
FALSE	High	MAGDSEGGGEEGGVR	[R].MAGDSEGGGEEGGVR.[R]	1xTMTpro [N-Term]; 1xPhospho [S5(100)]	1xTMTpro [N-Term]; 1xPhospho [S5(100)]	5.96741e-06	5.34993e-05	1	1	1	TGGT1_304650-t26_1-p1	TGGT1_304650-t26_1-p1 [2181-2195]	TGGT1_304650-t26_1-p1 1xPhospho [S2185(100)]	TGGT1_304650-t26_1-p1 1xPhospho [S2185(100)]	transcript=TGGT1_304650-t26_1 | gene=TGGT1_304650 | organism=Toxoplasma_gondii_GT1 | gene_product=PPIP5K2_N domain-containing protein [Source:UniProtKB/TrEMBL;Acc:S7UTW0] | transcript_product=histidine acid phosphatase superfamily protein | location=TGGT1_chrVIIa:565293-584527(-) | protein_length=2917 | sequence_SO=chromosome | SO=protein_coding_gene | is_pseudo=false	0	1791.75	15	0.97	0.967	0.827	1.092	1.059	1.056	0.903	1.011	0.897	0.856	-0.04	-0.05	-0.27	0.13	0.08	0.08	-0.15	0.02	-0.16	-0.22	0.781465	0.625436	0.381498	0.428807	0.776858	0.222801	0.336046	0.973454	0.811989	0.311145	0.970678
FALSE	High	LYTNTLASQVRPLGPK	[K].LYTNTLASQVRPLGPK.[G]	1xTMTpro [K16]; 1xTMTpro [N-Term]; 1xPhospho [S8(100)]	1xTMTpro [K16]; 1xTMTpro [N-Term]; 1xPhospho [Y2(0); T3(0); T5(0); S8(100)]	8.93055e-08	5.34993e-05	1	1	1	TGGT1_305980-t26_1-p1	TGGT1_305980-t26_1-p1 [383-398]	TGGT1_305980-t26_1-p1 1xPhospho [Y384(0); T385(0); T387(0); S390(100)]	TGGT1_305980-t26_1-p1 1xPhospho [S390(100)]	transcript=TGGT1_305980-t26_1 | gene=TGGT1_305980 | organism=Toxoplasma_gondii_GT1 | gene_product=Pyruvate dehydrogenase complex subunit PDH-E3I [Source:UniProtKB/TrEMBL;Acc:S7UIE0] | transcript_product=pyruvate dehydrogenase complex subunit PDH-E3I | location=TGGT1_chrIX:5486775-5490424(+) | protein_length=638 | sequence_SO=chromosome | SO=protein_coding_gene | is_pseudo=false	0	2446.37	16	1.057	0.879	1.172	0.806	0.852	0.708	0.945	0.966	0.789	0.922	0.08	-0.19	0.23	-0.31	-0.23	-0.5	-0.08	-0.05	-0.34	-0.12	0.675866	0.338015	0.17897	0.303663	0.585467	0.316775	0.545767	0.886935	0.150003	0.337135	0.952203
FALSE	High	IVSPSPPFSSPSSSCLR	[R].IVSPSPPFSSPSSSCLR.[L]	1xMethylthio [C15]; 1xTMTpro [N-Term]; 1xPhospho [S10(100)]	1xMethylthio [C15]; 1xTMTpro [N-Term]; 1xPhospho [S3(0); S5(0); S9(0); S10(100); S12(0); S13(0); S14(0)]	1.16737e-05	5.34993e-05	1	1	2	TGGT1_299130-t26_1-p1	TGGT1_299130-t26_1-p1 [1896-1912]	TGGT1_299130-t26_1-p1 1xMethylthio [C1910]; 1xPhospho [S1898(0); S1900(0); S1904(0); S1905(100); S1907(0); S1908(0); S1909(0)]	TGGT1_299130-t26_1-p1 1xMethylthio [C1910]; 1xPhospho [S1905(100)]	transcript=TGGT1_299130-t26_1 | gene=TGGT1_299130 | organism=Toxoplasma_gondii_GT1 | gene_product=hypothetical protein | transcript_product=hypothetical protein | location=TGGT1_chrIII:2138776-2151293(-) | protein_length=3218 | sequence_SO=chromosome | SO=protein_coding_gene | is_pseudo=false	0	2178.03	17	0.94	0.949	0.939	1.014	0.953	0.962	0.952	1.044	1.11	0.881	-0.09	-0.08	-0.09	0.02	-0.07	-0.06	-0.07	0.06	0.15	-0.18	0.747493	0.543451	0.417812	0.959407	0.586248	0.838931	0.81558	0.515356	0.161951	0.32812	0.962682
FALSE	High	LVSWYDNEWGYSNR	[K].LVSWYDNEWGYSNR.[L]	1xTMTpro [N-Term]	1xTMTpro [N-Term]	2.7561e-08	5.34993e-05	1	1	1	TGGT1_289690-t26_1-p1	TGGT1_289690-t26_1-p1 [462-475]			transcript=TGGT1_289690-t26_1 | gene=TGGT1_289690 | organism=Toxoplasma_gondii_GT1 | gene_product=Glyceraldehyde-3-phosphate dehydrogenase [Source:UniProtKB/TrEMBL;Acc:S7UQ54] | transcript_product=glyceraldehyde-3-phosphate dehydrogenase GAPDH1 | location=TGGT1_chrIX:3189155-3191218(-) | protein_length=489 | sequence_SO=chromosome | SO=protein_coding_gene | is_pseudo=false	0	2093	14	0.98	1.132	1.056	0.961	0.942	1.088	1.015	0.922	0.989	0.859	-0.03	0.18	0.08	-0.06	-0.09	0.12	0.02	-0.12	-0.02	-0.22	0.378255	0.157556	0.577011	0.0180954	0.130112	0.219451	0.864476	0.346833	0.843698	0.0773089	0.909509
FALSE	High	LVVDTCTDETDDAWETDGFGPVR	[R].LVVDTCTDETDDAWETDGFGPVR.[R]	1xMethylthio [C6]; 1xTMTpro [N-Term]; 1xPhospho [T10(99.5)]	1xMethylthio [C6]; 1xTMTpro [N-Term]; 1xPhospho [T5(0); T7(0.6); T10(99.5); T16(0)]	0.000114913	5.34993e-05	1	1	1	TGGT1_208350-t26_1-p1	TGGT1_208350-t26_1-p1 [138-160]	TGGT1_208350-t26_1-p1 1xMethylthio [C143]; 1xPhospho [T142(0); T144(0.6); T147(99.5); T153(0)]	TGGT1_208350-t26_1-p1 1xMethylthio [C143]; 1xPhospho [T147(99.5)]	transcript=TGGT1_208350-t26_1 | gene=TGGT1_208350 | organism=Toxoplasma_gondii_GT1 | gene_product=RRM domain-containing protein [Source:UniProtKB/TrEMBL;Acc:S7UJU6] | transcript_product=hypothetical protein | location=TGGT1_chrIb:640587-643083(-) | protein_length=369 | sequence_SO=chromosome | SO=protein_coding_gene | is_pseudo=false	0	2971.27	23
FALSE	High	IVVEQLDSEPEDTPTNSHSK	[R].IVVEQLDSEPEDTPTNSHSK.[L]	1xTMTpro [K20]; 1xTMTpro [N-Term]; 1xPhospho [S8(100)]	1xTMTpro [K20]; 1xTMTpro [N-Term]; 1xPhospho [S8(100); T13(0); T15(0); S17(0); S19(0)]	8.75198e-12	5.34993e-05	1	1	2	TGGT1_239700-t26_1-p1	TGGT1_239700-t26_1-p1 [347-366]	TGGT1_239700-t26_1-p1 1xPhospho [S354(100); T359(0); T361(0); S363(0); S365(0)]	TGGT1_239700-t26_1-p1 1xPhospho [S354(100)]	transcript=TGGT1_239700-t26_1 | gene=TGGT1_239700 | organism=Toxoplasma_gondii_GT1 | gene_product=Regulator of chromosome condensation (RCC1) repeat-containing protein [Source:UniProtKB/TrEMBL;Acc:S7UR29] | transcript_product=regulator of chromosome condensation (RCC1) repeat-containing protein | location=TGGT1_chrVI:831989-852759(+) | protein_length=2898 | sequence_SO=chromosome | SO=protein_cod…	0	2913.44	20	0.948	1.014	1.211	0.777	0.737	0.788	0.941	1.025	0.846	1.007	-0.08	0.02	0.28	-0.36	-0.44	-0.34	-0.09	0.04	-0.24	0.01	0.5728	0.704098	0.0540278	0.158953	0.25853	0.0956301	0.588715	0.618447	0.510354	0.938624	0.934371
FALSE	High	LVVTPQSGVPSSASLSMPQDFNPLQPLVAR	[R].LVVTPQSGVPSSASLSMPQDFNPLQPLVAR.[G]	1xOxidation [M17]; 1xTMTpro [N-Term]; 1xPhospho [S/T]	1xOxidation [M17]; 1xTMTpro [N-Term]; 1xPhospho [T4(0); S7(0.1); S11(25); S12(25); S14(25); S16(25)]	0.000169101	5.34993e-05	1	1	1	TGGT1_311230-t26_1-p1	TGGT1_311230-t26_1-p1 [3789-3818]			transcript=TGGT1_311230-t26_1 | gene=TGGT1_311230 | organism=Toxoplasma_gondii_GT1 | gene_product=hypothetical protein | transcript_product=hypothetical protein | location=TGGT1_chrXI:1844321-1862670(+) | protein_length=4603 | sequence_SO=chromosome | SO=protein_coding_gene | is_pseudo=false	0	3535.82	30
FALSE	High	LWDDQEQEAEGQSDSVSR	[K].LWDDQEQEAEGQSDSVSR.[G]	1xTMTpro [N-Term]; 1xPhospho [S]	1xTMTpro [N-Term]; 1xPhospho [S13(49.9); S15(49.9); S17(0.2)]	0.000220022	5.34993e-05	1	1	1	TGGT1_224870-t26_1-p1	TGGT1_224870-t26_1-p1 [7367-7384]			transcript=TGGT1_224870-t26_1 | gene=TGGT1_224870 | organism=Toxoplasma_gondii_GT1 | gene_product=Spatacsin_C domain-containing protein [Source:UniProtKB/TrEMBL;Acc:S7WCA2] | transcript_product=hypothetical protein | location=TGGT1_chrX:2638976-2675045(+) | protein_length=8635 | sequence_SO=chromosome | SO=protein_coding_gene | is_pseudo=false	0	2463.06	18
FALSE	High	LWGEPGDTETSEDLEER	[R].LWGEPGDTETSEDLEER.[L]	1xTMTpro [N-Term]; 1xPhospho [S11(100)]	1xTMTpro [N-Term]; 1xPhospho [T8(0); T10(0); S11(100)]	5.5287e-07	5.34993e-05	1	1	5	TGGT1_299130-t26_1-p1	TGGT1_299130-t26_1-p1 [2054-2070]	TGGT1_299130-t26_1-p1 1xPhospho [T2061(0); T2063(0); S2064(100)]	TGGT1_299130-t26_1-p1 1xPhospho [S2064(100)]	transcript=TGGT1_299130-t26_1 | gene=TGGT1_299130 | organism=Toxoplasma_gondii_GT1 | gene_product=hypothetical protein | transcript_product=hypothetical protein | location=TGGT1_chrIII:2138776-2151293(-) | protein_length=3218 | sequence_SO=chromosome | SO=protein_coding_gene | is_pseudo=false	0	2347.03	17
FALSE	High	LWNSSSPSGTPPQPPPVSPR	[R].LWNSSSPSGTPPQPPPVSPR.[V]	1xTMTpro [N-Term]; 1xPhospho [S18(100)]	1xTMTpro [N-Term]; 1xPhospho [S4(0); S5(0); S6(0); S8(0); T10(0); S18(100)]	2.83968e-06	5.34993e-05	1	1	1	TGGT1_221280-t26_1-p1	TGGT1_221280-t26_1-p1 [2508-2527]	TGGT1_221280-t26_1-p1 1xPhospho [S2511(0); S2512(0); S2513(0); S2515(0); T2517(0); S2525(100)]	TGGT1_221280-t26_1-p1 1xPhospho [S2525(100)]	transcript=TGGT1_221280-t26_1 | gene=TGGT1_221280 | organism=Toxoplasma_gondii_GT1 | gene_product=hypothetical protein | transcript_product=hypothetical protein | location=TGGT1_chrII:186622-203205(+) | protein_length=4037 | sequence_SO=chromosome | SO=protein_coding_gene | is_pseudo=false	0	2472.22	20	0.822	0.686	0.765	0.983	0.808	0.674	0.752	0.651	0.742	0.961	-0.28	-0.54	-0.39	-0.02	-0.31	-0.57	-0.41	-0.62	-0.43	-0.06	0.526327	0.314712	0.15571	0.302267	0.512812	0.314186	0.12839	0.36944	0.128886	0.796051	0.925931
FALSE	High	LWSLEAPPPSPQPVFFLR	[R].LWSLEAPPPSPQPVFFLR.[R]	1xTMTpro [N-Term]; 1xPhospho [S10(100)]	1xTMTpro [N-Term]; 1xPhospho [S3(0); S10(100)]	7.97396e-06	5.34993e-05	1	1	1	TGGT1_286230-t26_1-p1	TGGT1_286230-t26_1-p1 [1260-1277]	TGGT1_286230-t26_1-p1 1xPhospho [S1262(0); S1269(100)]	TGGT1_286230-t26_1-p1 1xPhospho [S1269(100)]	transcript=TGGT1_286230-t26_1 | gene=TGGT1_286230 | organism=Toxoplasma_gondii_GT1 | gene_product=hypothetical protein | transcript_product=hypothetical protein | location=TGGT1_chrV:1753645-1764533(-) | protein_length=2622 | sequence_SO=chromosome | SO=protein_coding_gene | is_pseudo=false	0	2465.3	18
FALSE	High	LWSQWINGSPETEGGEDADR	[R].LWSQWINGSPETEGGEDADR.[K]	1xTMTpro [N-Term]; 1xPhospho [S9(99.6)]	1xTMTpro [N-Term]; 1xPhospho [S3(0); S9(99.6); T12(0.4)]	0.000203414	5.34993e-05	1	1	1	TGGT1_306490-t26_1-p1	TGGT1_306490-t26_1-p1 [708-727]	TGGT1_306490-t26_1-p1 1xPhospho [S710(0); S716(99.6); T719(0.4)]	TGGT1_306490-t26_1-p1 1xPhospho [S716(99.6)]	transcript=TGGT1_306490-t26_1 | gene=TGGT1_306490 | organism=Toxoplasma_gondii_GT1 | gene_product=BSD domain-containing protein [Source:UniProtKB/TrEMBL;Acc:S7UIF3] | transcript_product=hypothetical protein | location=TGGT1_chrIX:5908753-5912719(-) | protein_length=1117 | sequence_SO=chromosome | SO=protein_coding_gene | is_pseudo=false	0	2631.17	20
FALSE	High	LWTPDEAGQDER	[K].LWTPDEAGQDER.[D]	1xTMTpro [N-Term]; 1xPhospho [T3(100)]	1xTMTpro [N-Term]; 1xPhospho [T3(100)]	6.50235e-05	5.34993e-05	1	1	5	TGGT1_229470-t26_1-p1	TGGT1_229470-t26_1-p1 [177-188]	TGGT1_229470-t26_1-p1 1xPhospho [T179(100)]	TGGT1_229470-t26_1-p1 1xPhospho [T179(100)]	transcript=TGGT1_229470-t26_1 | gene=TGGT1_229470 | organism=Toxoplasma_gondii_GT1 | gene_product=Btz domain-containing protein [Source:UniProtKB/TrEMBL;Acc:S7V376] | transcript_product=hypothetical protein | location=TGGT1_chrVIII:282578-286112(+) | protein_length=409 | sequence_SO=chromosome | SO=protein_coding_gene | is_pseudo=false	0	1800.81	12
FALSE	High	LWVGTICKPEENPNTNR	[K].LWVGTICKPEENPNTNR.[L]	1xMethylthio [C7]; 1xTMTpro [K8]; 1xTMTpro [N-Term]	1xMethylthio [C7]; 1xTMTpro [K8]; 1xTMTpro [N-Term]	7.6876e-07	5.34993e-05	1	1	1	TGGT1_211030-t26_1-p1	TGGT1_211030-t26_1-p1 [80-96]	TGGT1_211030-t26_1-p1 1xMethylthio [C86]	TGGT1_211030-t26_1-p1 1xMethylthio [C86]	transcript=TGGT1_211030-t26_1 | gene=TGGT1_211030 | organism=Toxoplasma_gondii_GT1 | gene_product=hypothetical protein | transcript_product=hypothetical protein | location=TGGT1_chrIV:1889471-1891938(-) | protein_length=191 | sequence_SO=chromosome | SO=protein_coding_gene | is_pseudo=false	0	2625.38	17	0.825	0.745	0.801	1.135	0.937	0.846	0.909	0.905	0.962	0.903	-0.28	-0.42	-0.32	0.18	-0.09	-0.24	-0.14	-0.14	-0.06	-0.15	0.0810831	0.353908	0.112227	0.520878	0.752528	0.17479	0.682254	0.257331	0.834069	0.525727	0.8946
FALSE	High	IYADDEDICSDAEESDGAGK	[R].IYADDEDICSDAEESDGAGK.[G]	1xMethylthio [C9]; 1xTMTpro [K20]; 1xTMTpro [N-Term]; 1xPhospho [S10(100)]	1xMethylthio [C9]; 1xTMTpro [K20]; 1xTMTpro [N-Term]; 1xPhospho [Y2(0); S10(100); S15(0)]	4.09123e-10	5.34993e-05	1	1	3	TGGT1_223760-t26_1-p1	TGGT1_223760-t26_1-p1 [737-756]	TGGT1_223760-t26_1-p1 1xMethylthio [C745]; 1xPhospho [Y738(0); S746(100); S751(0)]	TGGT1_223760-t26_1-p1 1xMethylthio [C745]; 1xPhospho [S746(100)]	transcript=TGGT1_223760-t26_1 | gene=TGGT1_223760 | organism=Toxoplasma_gondii_GT1 | gene_product=hypothetical protein | transcript_product=hypothetical protein | location=TGGT1_chrX:3506110-3512843(-) | protein_length=1588 | sequence_SO=chromosome | SO=protein_coding_gene | is_pseudo=false	0	2837.2	20	0.93	0.944	0.956	1.127	1.048	1.064	1.077	1.086	1.029	1.027	-0.11	-0.08	-0.07	0.17	0.07	0.09	0.11	0.12	0.04	0.04	0.373383	0.64988	0.553211	0.234541	0.0310779	0.419334	0.0620362	0.439273	0.791954	0.840386	0.909509
FALSE	High	IYADDEDICSDAEESDGAGK	[R].IYADDEDICSDAEESDGAGK.[G]	1xMethylthio [C9]; 1xTMTpro [K20]; 1xTMTpro [N-Term]; 2xPhospho [S10(100); S15(100)]	1xMethylthio [C9]; 1xTMTpro [K20]; 1xTMTpro [N-Term]; 2xPhospho [Y2(0); S10(100); S15(100)]	1.43987e-06	5.34993e-05	1	1	1	TGGT1_223760-t26_1-p1	TGGT1_223760-t26_1-p1 [737-756]	TGGT1_223760-t26_1-p1 1xMethylthio [C745]; 2xPhospho [Y738(0); S746(100); S751(100)]	TGGT1_223760-t26_1-p1 1xMethylthio [C745]; 2xPhospho [S746(100); S751(100)]	transcript=TGGT1_223760-t26_1 | gene=TGGT1_223760 | organism=Toxoplasma_gondii_GT1 | gene_product=hypothetical protein | transcript_product=hypothetical protein | location=TGGT1_chrX:3506110-3512843(-) | protein_length=1588 | sequence_SO=chromosome | SO=protein_coding_gene | is_pseudo=false	0	2917.17	20
FALSE	High	LYAETSEQEAEER	[R].LYAETSEQEAEER.[R]	1xTMTpro [N-Term]; 1xPhospho [S6(99.7)]	1xTMTpro [N-Term]; 1xPhospho [Y2(0); T5(0.3); S6(99.7)]	0.000282656	5.34993e-05	1	1	1	TGGT1_287970-t26_1-p1	TGGT1_287970-t26_1-p1 [770-782]	TGGT1_287970-t26_1-p1 1xPhospho [Y771(0); T774(0.3); S775(99.7)]	TGGT1_287970-t26_1-p1 1xPhospho [S775(99.7)]	transcript=TGGT1_287970-t26_1 | gene=TGGT1_287970 | organism=Toxoplasma_gondii_GT1 | gene_product=hypothetical protein | transcript_product=hypothetical protein | location=TGGT1_chrIX:2079498-2087097(+) | protein_length=2300 | sequence_SO=chromosome | SO=protein_coding_gene | is_pseudo=false	0	1938.87	13
FALSE	High	IYDDPDASDNDR	[R].IYDDPDASDNDR.[F]	1xTMTpro [N-Term]	1xTMTpro [N-Term]	9.54408e-05	5.34993e-05	1	1	4	TGGT1_267330-t26_1-p1	TGGT1_267330-t26_1-p1 [302-313]			transcript=TGGT1_267330-t26_1 | gene=TGGT1_267330 | organism=Toxoplasma_gondii_GT1 | gene_product=Fumarate hydratase [Source:UniProtKB/TrEMBL;Acc:S7VVH4] | transcript_product=fumarate hydratase | location=TGGT1_chrIX:545528-551285(+) | protein_length=775 | sequence_SO=chromosome | SO=protein_coding_gene | is_pseudo=false	0	1699.77	12
FALSE	High	LYELSFDGHK	[K].LYELSFDGHK.[-]	1xTMTpro [K10]; 1xTMTpro [N-Term]; 1xPhospho [S5(100)]	1xTMTpro [K10]; 1xTMTpro [N-Term]; 1xPhospho [Y2(0); S5(100)]	1.46379e-05	5.34993e-05	1	1	1	TGGT1_236200-t26_1-p1	TGGT1_236200-t26_1-p1 [1681-1690]	TGGT1_236200-t26_1-p1 1xPhospho [Y1682(0); S1685(100)]	TGGT1_236200-t26_1-p1 1xPhospho [S1685(100)]	transcript=TGGT1_236200-t26_1 | gene=TGGT1_236200 | organism=Toxoplasma_gondii_GT1 | gene_product=DNA mismatch repair protein, C-terminal domain-containing protein [Source:UniProtKB/TrEMBL;Acc:S7URQ6] | transcript_product=DNA mismatch repair protein, C-terminal domain-containing protein | location=TGGT1_chrX:5204326-5215148(-) | protein_length=1690 | sequence_SO=chromosome | SO=protein_coding_gen…	0	1896.98	10	0.902	0.947	0.944	0.824	0.743	0.78	0.777	1.187	1.051	0.993	-0.15	-0.08	-0.08	-0.28	-0.43	-0.36	-0.36	0.25	0.07	-0.01	0.64469	0.86576	0.91597	0.0928027	0.273502	0.540272	0.683663	0.385075	0.774638	0.979277	0.947964
FALSE	High	LYESMTEVNEDAER	[R].LYESMTEVNEDAER.[L]	1xTMTpro [N-Term]; 1xPhospho [S4(100)]	1xTMTpro [N-Term]; 1xPhospho [Y2(0); S4(100); T6(0)]	0.000348853	5.34993e-05	1	1	1	TGGT1_310220-t26_1-p1	TGGT1_310220-t26_1-p1 [1235-1248]	TGGT1_310220-t26_1-p1 1xPhospho [Y1236(0); S1238(100); T1240(0)]	TGGT1_310220-t26_1-p1 1xPhospho [S1238(100)]	transcript=TGGT1_310220-t26_1 | gene=TGGT1_310220 | organism=Toxoplasma_gondii_GT1 | gene_product=hypothetical protein | transcript_product=hypothetical protein | location=TGGT1_chrXI:1126646-1139419(+) | protein_length=1396 | sequence_SO=chromosome | SO=protein_coding_gene | is_pseudo=false	0	2069.91	14
FALSE	High	LYESMTEVNEDAER	[R].LYESMTEVNEDAER.[L]	1xOxidation [M5]; 1xTMTpro [N-Term]; 1xPhospho [S4(100)]	1xOxidation [M5]; 1xTMTpro [N-Term]; 1xPhospho [Y2(0); S4(100); T6(0)]	0.000193289	5.34993e-05	1	1	1	TGGT1_310220-t26_1-p1	TGGT1_310220-t26_1-p1 [1235-1248]	TGGT1_310220-t26_1-p1 1xPhospho [Y1236(0); S1238(100); T1240(0)]	TGGT1_310220-t26_1-p1 1xPhospho [S1238(100)]	transcript=TGGT1_310220-t26_1 | gene=TGGT1_310220 | organism=Toxoplasma_gondii_GT1 | gene_product=hypothetical protein | transcript_product=hypothetical protein | location=TGGT1_chrXI:1126646-1139419(+) | protein_length=1396 | sequence_SO=chromosome | SO=protein_coding_gene | is_pseudo=false	0	2085.9	14
FALSE	High	IYHLPDAESDEDEDFK	[K].IYHLPDAESDEDEDFK.[E]	1xTMTpro [K16]; 1xTMTpro [N-Term]; 1xPhospho [S9(100)]	1xTMTpro [K16]; 1xTMTpro [N-Term]; 1xPhospho [Y2(0); S9(100)]	3.0803e-08	5.34993e-05	1	1	1	Q15019	Q15019 [210-225]	Q15019 1xPhospho [Y211(0); S218(100)]	Q15019 1xPhospho [S218(100)]	Septin-2 OS=Homo sapiens (Human) OX=9606 GN=SEPTIN2 PE=1 SV=1	0	2611.21	16	0.937	1.067	1.123	1.274	1.194	1.36	1.43	1.57	1.319	1.303	-0.09	0.09	0.17	0.35	0.26	0.44	0.52	0.65	0.4	0.38	0.898405	0.440907	0.436368	0.298755	0.79279	0.139931	0.0501608	0.00859868	0.484248	0.376372	0.986237
FALSE	High	IYHLPDAESDEDEDFKEQTR	[K].IYHLPDAESDEDEDFKEQTR.[L]	1xTMTpro [K16]; 1xTMTpro [N-Term]; 1xPhospho [S9(100)]	1xTMTpro [K16]; 1xTMTpro [N-Term]; 1xPhospho [Y2(0); S9(100); T19(0)]	7.22751e-09	5.34993e-05	1	1	7	Q15019	Q15019 [210-229]	Q15019 1xPhospho [Y211(0); S218(100); T228(0)]	Q15019 1xPhospho [S218(100)]	Septin-2 OS=Homo sapiens (Human) OX=9606 GN=SEPTIN2 PE=1 SV=1	1	3125.46	20	1.084	0.991	0.988	0.866	0.939	0.859	0.856	0.924	0.824	0.926	0.12	-0.01	-0.02	-0.21	-0.09	-0.22	-0.23	-0.11	-0.28	-0.11	0.129822	0.942148	0.889082	0.330422	0.513574	0.051112	0.0449204	0.407473	0.259144	0.151153	0.8946
FALSE	High	LYKDDHEEDTIGEDGNACGK	[K].LYKDDHEEDTIGEDGNACGK.[V]	1xMethylthio [C18]; 2xTMTpro [K3; K20]; 1xTMTpro [N-Term]	1xMethylthio [C18]; 2xTMTpro [K3; K20]; 1xTMTpro [N-Term]	4.66261e-14	5.34993e-05	1	1	2	TGGT1_293690-t26_1-p1	TGGT1_293690-t26_1-p1 [47-66]	TGGT1_293690-t26_1-p1 1xMethylthio [C64]	TGGT1_293690-t26_1-p1 1xMethylthio [C64]	transcript=TGGT1_293690-t26_1 | gene=TGGT1_293690 | organism=Toxoplasma_gondii_GT1 | gene_product=Profilin [Source:UniProtKB/TrEMBL;Acc:S7UIQ6] | transcript_product=profilin PRF | location=TGGT1_chrIa:496750-498091(-) | protein_length=165 | sequence_SO=chromosome | SO=protein_coding_gene | is_pseudo=false	1	3167.54	20	1.086	1.142	1.066	0.918	0.997	1.049	0.979	1.013	0.883	0.987	0.12	0.19	0.09	-0.12	0	0.07	-0.03	0.02	-0.18	-0.02	0.136447	0.534254	0.604538	0.561879	0.979393	0.477934	0.378283	0.926863	0.572148	0.969416	0.8946
FALSE	High	LYKDDHEEDTIGEDGNACGK	[K].LYKDDHEEDTIGEDGNACGK.[V]	1xMethylthio [C18]; 2xTMTpro [K3; K20]; 1xTMTpro [N-Term]; 1xPhospho [T10(100)]	1xMethylthio [C18]; 2xTMTpro [K3; K20]; 1xTMTpro [N-Term]; 1xPhospho [Y2(0); T10(100)]	3.38473e-09	5.34993e-05	1	1	2	TGGT1_293690-t26_1-p1	TGGT1_293690-t26_1-p1 [47-66]	TGGT1_293690-t26_1-p1 1xMethylthio [C64]; 1xPhospho [Y48(0); T56(100)]	TGGT1_293690-t26_1-p1 1xMethylthio [C64]; 1xPhospho [T56(100)]	transcript=TGGT1_293690-t26_1 | gene=TGGT1_293690 | organism=Toxoplasma_gondii_GT1 | gene_product=Profilin [Source:UniProtKB/TrEMBL;Acc:S7UIQ6] | transcript_product=profilin PRF | location=TGGT1_chrIa:496750-498091(-) | protein_length=165 | sequence_SO=chromosome | SO=protein_coding_gene | is_pseudo=false	1	3247.51	20	0.932	0.91	0.956	1.152	1.073	1.048	1.101	1.111	0.967	1.088	-0.1	-0.14	-0.06	0.2	0.1	0.07	0.14	0.15	-0.05	0.12	0.330643	0.526795	0.12225	0.406763	0.471065	0.0370442	0.552433	0.603927	0.737604	0.579685	0.9065
FALSE	High	IYNLHTLR	[R].IYNLHTLR.[E]	1xTMTpro [N-Term]; 1xPhospho [T6(100)]	1xTMTpro [N-Term]; 1xPhospho [Y2(0); T6(100)]	0.000133503	5.34993e-05	1	1	3	TGGT1_289990-t26_1-p1	TGGT1_289990-t26_1-p1 [54-61]	TGGT1_289990-t26_1-p1 1xPhospho [Y55(0); T59(100)]	TGGT1_289990-t26_1-p1 1xPhospho [T59(100)]	transcript=TGGT1_289990-t26_1 | gene=TGGT1_289990 | organism=Toxoplasma_gondii_GT1 | gene_product=hypothetical protein | transcript_product=hypothetical protein | location=TGGT1_chrIX:3375629-3379939(-) | protein_length=753 | sequence_SO=chromosome | SO=protein_coding_gene | is_pseudo=false	0	1413.76	8	0.861	0.885	0.674	1.067	0.918	0.945	0.72	1.219	1.119	0.719	-0.22	-0.18	-0.57	0.09	-0.12	-0.08	-0.47	0.29	0.16	-0.48	0.562206	0.0966874	0.306728	0.730389	0.269972	0.73039	0.117953	0.384309	0.656975	0.0361205	0.933506
FALSE	High	LYNPVHVLCGTPGR	[R].LYNPVHVLCGTPGR.[I]	1xMethylthio [C9]; 1xTMTpro [N-Term]; 1xPhospho [T11(100)]	1xMethylthio [C9]; 1xTMTpro [N-Term]; 1xPhospho [Y2(0); T11(100)]	1.76835e-07	5.34993e-05	1	1	1	TGGT1_313010-t26_1-p1	TGGT1_313010-t26_1-p1 [217-230]	TGGT1_313010-t26_1-p1 1xMethylthio [C225]; 1xPhospho [Y218(0); T227(100)]	TGGT1_313010-t26_1-p1 1xMethylthio [C225]; 1xPhospho [T227(100)]	transcript=TGGT1_313010-t26_1 | gene=TGGT1_313010 | organism=Toxoplasma_gondii_GT1 | gene_product=DEAD (Asp-Glu-Ala-Asp) box polypeptide DDX6 [Source:UniProtKB/TrEMBL;Acc:S7W8B2] | transcript_product=DEAD (Asp-Glu-Ala-Asp) box polypeptide DDX6 | location=TGGT1_chrXI:2995385-2998767(-) | protein_length=475 | sequence_SO=chromosome | SO=protein_coding_gene | is_pseudo=false	0	1955.96	14	1	1.106	0.987	1.049	1.049	1.161	1.036	0.936	1.125	1.08	0	0.15	-0.02	0.07	0.07	0.21	0.05	-0.1	0.17	0.11	0.984211	0.589303	0.810067	0.534001	0.438557	0.572646	0.775727	0.517479	0.507982	0.846099	0.996394
FALSE	High	IYSQTDQTGLLR	[K].IYSQTDQTGLLR.[S]	1xTMTpro [N-Term]; 1xPhospho [S3(100)]	1xTMTpro [N-Term]; 1xPhospho [Y2(0); S3(100); T5(0); T8(0)]	0.000365501	5.34993e-05	1	1	1	TGGT1_310220-t26_1-p1	TGGT1_310220-t26_1-p1 [353-364]	TGGT1_310220-t26_1-p1 1xPhospho [Y354(0); S355(100); T357(0); T360(0)]	TGGT1_310220-t26_1-p1 1xPhospho [S355(100)]	transcript=TGGT1_310220-t26_1 | gene=TGGT1_310220 | organism=Toxoplasma_gondii_GT1 | gene_product=hypothetical protein | transcript_product=hypothetical protein | location=TGGT1_chrXI:1126646-1139419(+) | protein_length=1396 | sequence_SO=chromosome | SO=protein_coding_gene | is_pseudo=false	0	1778.9	12
FALSE	High	LYTGGNVSEEDTR	[K].LYTGGNVSEEDTR.[K]	1xTMTpro [N-Term]; 1xPhospho [S8(100)]	1xTMTpro [N-Term]; 1xPhospho [Y2(0); T3(0); S8(100); T12(0)]	4.93179e-06	5.34993e-05	1	1	6	TGGT1_240380-t26_1-p1	TGGT1_240380-t26_1-p1 [2736-2748]	TGGT1_240380-t26_1-p1 1xPhospho [Y2737(0); T2738(0); S2743(100); T2747(0)]	TGGT1_240380-t26_1-p1 1xPhospho [S2743(100)]	transcript=TGGT1_240380-t26_1 | gene=TGGT1_240380 | organism=Toxoplasma_gondii_GT1 | gene_product=Clu domain-containing protein [Source:UniProtKB/TrEMBL;Acc:S7URC6] | transcript_product=hypothetical protein | location=TGGT1_chrVI:1188384-1214121(+) | protein_length=4955 | sequence_SO=chromosome | SO=protein_coding_gene | is_pseudo=false	0	1824.83	13	1.058	1.042	0.891	1.225	1.296	1.276	1.091	1.132	1.289	1.325	0.08	0.06	-0.17	0.29	0.37	0.35	0.13	0.18	0.37	0.41	0.830083	0.159959	0.639576	0.591575	0.152789	0.546279	0.879293	0.381163	0.601625	0.433446	0.976273
FALSE	High	LTISPSGEGDVFYGK	[K].LTISPSGEGDVFYGK.[E]	1xTMTpro [K15]; 1xTMTpro [N-Term]	1xTMTpro [K15]; 1xTMTpro [N-Term]	1.34671e-05	5.34993e-05	1	1	1	TGGT1_271050-t26_1-p1	TGGT1_271050-t26_1-p1 [61-75]			transcript=TGGT1_271050-t26_1 | gene=TGGT1_271050 | organism=Toxoplasma_gondii_GT1 | gene_product=SAG domain-containing protein [Source:UniProtKB/TrEMBL;Acc:A0A125YVU5] | transcript_product=SAG-related sequence SRS34A | location=TGGT1_chrVIII:4754604-4755164(+) | protein_length=186 | sequence_SO=chromosome | SO=protein_coding_gene | is_pseudo=false	0	2178.19	15	1.162	0.992	0.844	0.874	1.016	0.868	0.738	1.278	1.164	0.954	0.22	-0.01	-0.25	-0.19	0.02	-0.2	-0.44	0.35	0.22	-0.07	0.164668	0.938224	0.17357	0.506972	0.94273	0.249507	0.347379	0.0636733	0.42527	0.517067	0.895983
FALSE	High	LTLEEADDPPLWFDCDESPTTR	[R].LTLEEADDPPLWFDCDESPTTR.[R]	1xMethylthio [C15]; 1xTMTpro [N-Term]; 1xPhospho [S18(99.8)]	1xMethylthio [C15]; 1xTMTpro [N-Term]; 1xPhospho [T2(0); S18(99.8); T20(0.2); T21(0)]	2.35725e-13	5.34993e-05	1	1	2	TGGT1_258420-t26_1-p1	TGGT1_258420-t26_1-p1 [1436-1457]	TGGT1_258420-t26_1-p1 1xMethylthio [C1450]; 1xPhospho [T1437(0); S1453(99.8); T1455(0.2); T1456(0)]	TGGT1_258420-t26_1-p1 1xMethylthio [C1450]; 1xPhospho [S1453(99.8)]	transcript=TGGT1_258420-t26_1 | gene=TGGT1_258420 | organism=Toxoplasma_gondii_GT1 | gene_product=hypothetical protein | transcript_product=hypothetical protein | location=TGGT1_chrVIIb:3389928-3398497(-) | protein_length=2403 | sequence_SO=chromosome | SO=protein_coding_gene | is_pseudo=false	0	2980.3	22
FALSE	High	LTHEGDDDGAPNSDGK	[R].LTHEGDDDGAPNSDGK.[S]	1xTMTpro [K16]; 1xTMTpro [N-Term]; 1xPhospho [S13(100)]	1xTMTpro [K16]; 1xTMTpro [N-Term]; 1xPhospho [T2(0); S13(100)]	1.49504e-08	5.34993e-05	1	1	4	TGGT1_216480-t26_1-p1	TGGT1_216480-t26_1-p1 [761-776]	TGGT1_216480-t26_1-p1 1xPhospho [T762(0); S773(100)]	TGGT1_216480-t26_1-p1 1xPhospho [S773(100)]	transcript=TGGT1_216480-t26_1 | gene=TGGT1_216480 | organism=Toxoplasma_gondii_GT1 | gene_product=NMD3 domain-containing protein [Source:UniProtKB/TrEMBL;Acc:S7UKY3] | transcript_product=NMD3 family protein | location=TGGT1_chrXI:6042136-6045440(+) | protein_length=799 | sequence_SO=chromosome | SO=protein_coding_gene | is_pseudo=false	0	2316.06	16
FALSE	High	LTGKPSPPQPLPPPTHPLDSPR	[R].LTGKPSPPQPLPPPTHPLDSPR.[S]	1xTMTpro [K4]; 1xTMTpro [N-Term]; 1xPhospho [S20(100)]	1xTMTpro [K4]; 1xTMTpro [N-Term]; 1xPhospho [T2(0); S6(0); T15(0); S20(100)]	5.60522e-09	5.34993e-05	1	1	4	TGGT1_269390-t26_1-p1	TGGT1_269390-t26_1-p1 [20-41]	TGGT1_269390-t26_1-p1 1xPhospho [T21(0); S25(0); T34(0); S39(100)]	TGGT1_269390-t26_1-p1 1xPhospho [S39(100)]	transcript=TGGT1_269390-t26_1 | gene=TGGT1_269390 | organism=Toxoplasma_gondii_GT1 | gene_product=CRAL/TRIO domain-containing protein [Source:UniProtKB/TrEMBL;Acc:S7V5J7] | transcript_product=CRAL/TRIO domain-containing protein | location=TGGT1_chrVIII:5840638-5846891(-) | protein_length=994 | sequence_SO=chromosome | SO=protein_coding_gene | is_pseudo=false	0	3017.65	22
FALSE	High	LSLPDSDRTSVYHGDDER	[K].LSLPDSDRTSVYHGDDER.[G]	1xTMTpro [N-Term]; 1xPhospho [S/T/Y]	1xTMTpro [N-Term]; 1xPhospho [S2(0); S6(33.3); T9(33.3); S10(33.3); Y12(0)]	0.000111781	5.34993e-05	1	1	4	TGGT1_209250-t26_1-p1	TGGT1_209250-t26_1-p1 [981-998]			transcript=TGGT1_209250-t26_1 | gene=TGGT1_209250 | organism=Toxoplasma_gondii_GT1 | gene_product=hypothetical protein | transcript_product=hypothetical protein | location=TGGT1_chrIb:1161236-1166853(+) | protein_length=1018 | sequence_SO=chromosome | SO=protein_coding_gene | is_pseudo=false	1	2446.12	18
FALSE	High	LSIQSISPLSLR	[R].LSIQSISPLSLR.[R]	1xTMTpro [N-Term]; 1xPhospho [S7(100)]	1xTMTpro [N-Term]; 1xPhospho [S2(0); S5(0); S7(100); S10(0)]	1.19077e-05	5.34993e-05	1	1	1	TGGT1_285650-t26_1-p1	TGGT1_285650-t26_1-p1 [1256-1267]	TGGT1_285650-t26_1-p1 1xPhospho [S1257(0); S1260(0); S1262(100); S1265(0)]	TGGT1_285650-t26_1-p1 1xPhospho [S1262(100)]	transcript=TGGT1_285650-t26_1 | gene=TGGT1_285650 | organism=Toxoplasma_gondii_GT1 | gene_product=hypothetical protein | transcript_product=hypothetical protein | location=TGGT1_chrV:2175312-2182741(-) | protein_length=2263 | sequence_SO=chromosome | SO=protein_coding_gene | is_pseudo=false	0	1697.95	12
FALSE	High	LSLQVTQTTPR	[R].LSLQVTQTTPR.[G]	1xTMTpro [N-Term]; 1xPhospho [T9(100)]	1xTMTpro [N-Term]; 1xPhospho [S2(0); T6(0); T8(0); T9(100)]	0.000447007	5.34993e-05	1	1	2	TGGT1_264090-t26_1-p1	TGGT1_264090-t26_1-p1 [690-700]	TGGT1_264090-t26_1-p1 1xPhospho [S691(0); T695(0); T697(0); T698(100)]	TGGT1_264090-t26_1-p1 1xPhospho [T698(100)]	transcript=TGGT1_264090-t26_1 | gene=TGGT1_264090 | organism=Toxoplasma_gondii_GT1 | gene_product=hypothetical protein | transcript_product=hypothetical protein | location=TGGT1_chrVIIb:158774-174140(+) | protein_length=2986 | sequence_SO=chromosome | SO=protein_coding_gene | is_pseudo=false	0	1627.87	11	1.04	0.983	0.821	0.861	0.896	0.847	0.707	0.926	0.832	0.598	0.06	-0.02	-0.29	-0.22	-0.16	-0.24	-0.5	-0.11	-0.26	-0.74	0.398453	0.925693	0.362435	0.311862	0.495742	0.235783	0.0855901	0.167811	0.0610003	0.166904	0.910538
FALSE	High	LSNFSYTHESR	[R].LSNFSYTHESR.[A]	1xTMTpro [N-Term]; 1xPhospho [S5(100)]	1xTMTpro [N-Term]; 1xPhospho [S2(0); S5(100); Y6(0); T7(0); S10(0)]	1.92494e-05	5.34993e-05	1	1	4	TGGT1_289880-t26_1-p1	TGGT1_289880-t26_1-p1 [697-707]	TGGT1_289880-t26_1-p1 1xPhospho [S698(0); S701(100); Y702(0); T703(0); S706(0)]	TGGT1_289880-t26_1-p1 1xPhospho [S701(100)]	transcript=TGGT1_289880-t26_1 | gene=TGGT1_289880 | organism=Toxoplasma_gondii_GT1 | gene_product=hypothetical protein | transcript_product=hypothetical protein | location=TGGT1_chrIX:3301494-3313288(-) | protein_length=1326 | sequence_SO=chromosome | SO=protein_coding_gene | is_pseudo=false	0	1724.8	11	1.223	1.345	1.242	0.677	0.828	0.91	0.841	1.129	1.236	1.463	0.29	0.43	0.31	-0.56	-0.27	-0.14	-0.25	0.17	0.31	0.55	0.60586	0.388509	0.701511	0.256476	0.351704	0.262575	0.6277	0.499912	0.554654	0.258464	0.940726
FALSE	High	LSNFSYTHESR	[R].LSNFSYTHESR.[A]	1xTMTpro [N-Term]; 2xPhospho [S2(100); S5(100)]	1xTMTpro [N-Term]; 2xPhospho [S2(100); S5(100); Y6(0); T7(0); S10(0)]	1.84922e-06	5.34993e-05	1	1	6	TGGT1_289880-t26_1-p1	TGGT1_289880-t26_1-p1 [697-707]	TGGT1_289880-t26_1-p1 2xPhospho [S698(100); S701(100); Y702(0); T703(0); S706(0)]	TGGT1_289880-t26_1-p1 2xPhospho [S698(100); S701(100)]	transcript=TGGT1_289880-t26_1 | gene=TGGT1_289880 | organism=Toxoplasma_gondii_GT1 | gene_product=hypothetical protein | transcript_product=hypothetical protein | location=TGGT1_chrIX:3301494-3313288(-) | protein_length=1326 | sequence_SO=chromosome | SO=protein_coding_gene | is_pseudo=false	0	1804.76	11	0.986	2.183	3.007	1.005	0.991	2.194	3.022	1.201	1.738	2.784	-0.02	1.13	1.59	0.01	-0.01	1.13	1.6	0.26	0.8	1.48	0.981269	0.525174	0.478473	0.990984	0.954959	0.358338	0.350801	0.35857	0.187494	0.377249	0.996394
FALSE	High	LSNSNWEHYAASEHNSSVDDHDDNQR	[K].LSNSNWEHYAASEHNSSVDDHDDNQR.[R]	1xTMTpro [N-Term]; 1xPhospho [S/Y]	1xTMTpro [N-Term]; 1xPhospho [S2(50); S4(50); Y9(0); S12(0); S16(0); S17(0)]	0.000243623	5.34993e-05	1	1	1	TGGT1_313140-t26_1-p1	TGGT1_313140-t26_1-p1 [595-620]			transcript=TGGT1_313140-t26_1 | gene=TGGT1_313140 | organism=Toxoplasma_gondii_GT1 | gene_product=Iso_dh domain-containing protein [Source:UniProtKB/TrEMBL;Acc:S7W894] | transcript_product=isocitrate dehydrogenase | location=TGGT1_chrXI:3095680-3101525(-) | protein_length=621 | sequence_SO=chromosome | SO=protein_coding_gene | is_pseudo=false	0	3411.42	26
FALSE	High	LSPASENEAESTHGR	[R].LSPASENEAESTHGR.[R]	1xTMTpro [N-Term]; 1xPhospho [S5(100)]	1xTMTpro [N-Term]; 1xPhospho [S2(0); S5(100); S11(0); T12(0)]	8.92095e-09	5.34993e-05	1	1	3	TGGT1_202740-t26_1-p1	TGGT1_202740-t26_1-p1 [207-221]	TGGT1_202740-t26_1-p1 1xPhospho [S208(0); S211(100); S217(0); T218(0)]	TGGT1_202740-t26_1-p1 1xPhospho [S211(100)]	transcript=TGGT1_202740-t26_1 | gene=TGGT1_202740 | organism=Toxoplasma_gondii_GT1 | gene_product=hypothetical protein | transcript_product=hypothetical protein | location=TGGT1_chrVIIa:2962165-2967907(-) | protein_length=1099 | sequence_SO=chromosome | SO=protein_coding_gene | is_pseudo=false	0	1968.9	15	1.049	1.024	0.934	0.998	1.047	1.022	0.932	1.016	1.086	0.876	0.07	0.03	-0.1	0	0.07	0.03	-0.1	0.02	0.12	-0.19	0.136837	0.545557	0.193597	0.871606	0.00310045	0.418967	0.0951156	0.864964	0.552625	0.389898	0.8946
FALSE	High	LSPASENEAESTHGR	[R].LSPASENEAESTHGR.[R]	1xTMTpro [N-Term]; 2xPhospho [S2(100); S5(100)]	1xTMTpro [N-Term]; 2xPhospho [S2(100); S5(100); S11(0); T12(0)]	1.03218e-05	5.34993e-05	1	1	2	TGGT1_202740-t26_1-p1	TGGT1_202740-t26_1-p1 [207-221]	TGGT1_202740-t26_1-p1 2xPhospho [S208(100); S211(100); S217(0); T218(0)]	TGGT1_202740-t26_1-p1 2xPhospho [S208(100); S211(100)]	transcript=TGGT1_202740-t26_1 | gene=TGGT1_202740 | organism=Toxoplasma_gondii_GT1 | gene_product=hypothetical protein | transcript_product=hypothetical protein | location=TGGT1_chrVIIa:2962165-2967907(-) | protein_length=1099 | sequence_SO=chromosome | SO=protein_coding_gene | is_pseudo=false	0	2048.86	15	1.23	1.078	0.925	0.828	1.018	0.893	0.766	0.884	0.805	1.086	0.3	0.11	-0.11	-0.27	0.03	-0.16	-0.38	-0.18	-0.31	0.12	0.735825	0.812183	0.866037	0.766684	0.553294	0.722622	0.279864	0.714353	0.502768	0.701913	0.96062
FALSE	High	LSPEVAPPAHR	[R].LSPEVAPPAHR.[R]	1xTMTpro [N-Term]; 1xPhospho [S2(100)]	1xTMTpro [N-Term]; 1xPhospho [S2(100)]	0.000109163	5.34993e-05	1	1	2	Q8TAD8	Q8TAD8 [34-44]	Q8TAD8 1xPhospho [S35(100)]	Q8TAD8 1xPhospho [S35(100)]	Smad nuclear-interacting protein 1 OS=Homo sapiens (Human) OX=9606 GN=SNIP1 PE=1 SV=1	0	1557.81	11
FALSE	High	LSPLPASPLSTDECSAAQPR	[R].LSPLPASPLSTDECSAAQPR.[S]	1xMethylthio [C14]; 1xTMTpro [N-Term]; 1xPhospho [S7(100)]	1xMethylthio [C14]; 1xTMTpro [N-Term]; 1xPhospho [S2(0); S7(100); S10(0); T11(0); S15(0)]	2.65428e-06	5.34993e-05	1	1	1	TGGT1_294010-t26_1-p1	TGGT1_294010-t26_1-p1 [536-555]	TGGT1_294010-t26_1-p1 1xMethylthio [C549]; 1xPhospho [S537(0); S542(100); S545(0); T546(0); S550(0)]	TGGT1_294010-t26_1-p1 1xMethylthio [C549]; 1xPhospho [S542(100)]	transcript=TGGT1_294010-t26_1 | gene=TGGT1_294010 | organism=Toxoplasma_gondii_GT1 | gene_product=YrdC-like domain-containing protein [Source:UniProtKB/TrEMBL;Acc:S7UIN8] | transcript_product=yrdC domain-containing protein | location=TGGT1_chrIa:626587-630046(-) | protein_length=828 | sequence_SO=chromosome | SO=protein_coding_gene | is_pseudo=false	0	2470.17	20	0.835	1.174	1.001	0.794	0.663	0.932	0.796	0.845	0.798	0.806	-0.26	0.23	0	-0.33	-0.59	-0.1	-0.33	-0.24	-0.33	-0.31	0.164372	0.237204	0.778925	0.275081	0.0902089	0.354048	0.285292	0.0926137	0.0862553	0.445008	0.895983
FALSE	High	LSPPASCASTSAGDDR	[R].LSPPASCASTSAGDDR.[G]	1xMethylthio [C7]; 1xTMTpro [N-Term]; 1xPhospho [S2(100)]	1xMethylthio [C7]; 1xTMTpro [N-Term]; 1xPhospho [S2(100); S6(0); S9(0); T10(0); S11(0)]	4.10005e-08	5.34993e-05	1	1	4	TGGT1_225470-t26_1-p1	TGGT1_225470-t26_1-p1 [68-83]	TGGT1_225470-t26_1-p1 1xMethylthio [C74]; 1xPhospho [S69(100); S73(0); S76(0); T77(0); S78(0)]	TGGT1_225470-t26_1-p1 1xMethylthio [C74]; 1xPhospho [S69(100)]	transcript=TGGT1_225470-t26_1 | gene=TGGT1_225470 | organism=Toxoplasma_gondii_GT1 | gene_product=PMSR domain-containing protein [Source:UniProtKB/TrEMBL;Acc:A0A125YIM6] | transcript_product=peptide methionine sulfoxide reductase | location=TGGT1_chrX:2131925-2133032(+) | protein_length=269 | sequence_SO=chromosome | SO=protein_coding_gene | is_pseudo=false	0	1964.84	16
FALSE	High	LSPQAHGGDR	[R].LSPQAHGGDR.[A]	1xTMTpro [N-Term]; 1xPhospho [S2(100)]	1xTMTpro [N-Term]; 1xPhospho [S2(100)]	6.08707e-06	5.34993e-05	1	1	8	TGGT1_214090-t26_1-p1	TGGT1_214090-t26_1-p1 [1278-1287]	TGGT1_214090-t26_1-p1 1xPhospho [S1279(100)]	TGGT1_214090-t26_1-p1 1xPhospho [S1279(100)]	transcript=TGGT1_214090-t26_1 | gene=TGGT1_214090 | organism=Toxoplasma_gondii_GT1 | gene_product=Signal peptidase [Source:UniProtKB/TrEMBL;Acc:S7W5I3] | transcript_product=signal peptidase | location=TGGT1_chrX:5908335-5920860(+) | protein_length=1859 | sequence_SO=chromosome | SO=protein_coding_gene | is_pseudo=false	0	1421.69	10	1.184	0.934	0.793	0.944	1.117	0.881	0.749	1.304	1.484	1.055	0.24	-0.1	-0.33	-0.08	0.16	-0.18	-0.42	0.38	0.57	0.08	0.257722	0.387031	0.46342	0.738446	0.321538	0.379913	0.157068	0.213509	0.243926	0.673481	0.900211
FALSE	High	LSLLMPSSPPLPGYPLIR	[R].LSLLMPSSPPLPGYPLIR.[A]	1xOxidation [M5]; 1xTMTpro [N-Term]; 1xPhospho [S7(99.2)]	1xOxidation [M5]; 1xTMTpro [N-Term]; 1xPhospho [S2(0.4); S7(99.2); S8(0.4); Y14(0)]	2.81721e-06	5.34993e-05	1	1	1	TGGT1_252850-t26_1-p1	TGGT1_252850-t26_1-p1 [521-538]	TGGT1_252850-t26_1-p1 1xPhospho [S522(0.4); S527(99.2); S528(0.4); Y534(0)]	TGGT1_252850-t26_1-p1 1xPhospho [S527(99.2)]	transcript=TGGT1_252850-t26_1 | gene=TGGT1_252850 | organism=Toxoplasma_gondii_GT1 | gene_product=Initiation factor, subunit 2 family protein [Source:UniProtKB/TrEMBL;Acc:S7VNP5] | transcript_product=initiation factor, subunit 2 family protein | location=TGGT1_chrIII:597067-600971(+) | protein_length=710 | sequence_SO=chromosome | SO=protein_coding_gene | is_pseudo=false	0	2351.28	18
FALSE	High	LSPQEQMDLLHAANFSER	[R].LSPQEQMDLLHAANFSER.[D]	1xTMTpro [N-Term]; 1xPhospho [S2(100)]	1xTMTpro [N-Term]; 1xPhospho [S2(100); S16(0)]	6.30512e-16	5.34993e-05	1	1	1	TGGT1_213800-t26_1-p1	TGGT1_213800-t26_1-p1 [8-25]	TGGT1_213800-t26_1-p1 1xPhospho [S9(100); S23(0)]	TGGT1_213800-t26_1-p1 1xPhospho [S9(100)]	transcript=TGGT1_213800-t26_1 | gene=TGGT1_213800 | organism=Toxoplasma_gondii_GT1 | gene_product=putative protein phosphatase 2b regulatory subunit | transcript_product=putative protein phosphatase 2b regulatory subunit | location=TGGT1_chrV:1211677-1214305(-) | protein_length=177 | sequence_SO=chromosome | SO=protein_coding_gene | is_pseudo=false	0	2470.18	18	0.896	1.018	0.981	1.204	1.078	1.225	1.181	1.127	1.136	1.118	-0.16	0.03	-0.03	0.27	0.11	0.29	0.24	0.17	0.18	0.16	0.520603	0.912549	0.614431	0.350957	0.0319907	0.0450535	0.448543	0.586947	0.653802	0.608973	0.925814
FALSE	High	LSPSSTLTPSGPVSAPSR	[R].LSPSSTLTPSGPVSAPSR.[S]	1xTMTpro [N-Term]; 1xPhospho [S2(99.5)]	1xTMTpro [N-Term]; 1xPhospho [S2(99.5); S4(0.5); S5(0); T6(0); T8(0); S10(0); S14(0); S17(0)]	4.98668e-05	5.34993e-05	1	1	2	TGGT1_319610-t26_1-p1	TGGT1_319610-t26_1-p1 [859-876]	TGGT1_319610-t26_1-p1 1xPhospho [S860(99.5); S862(0.5); S863(0); T864(0); T866(0); S868(0); S872(0); S875(0)]	TGGT1_319610-t26_1-p1 1xPhospho [S860(99.5)]	transcript=TGGT1_319610-t26_1 | gene=TGGT1_319610 | organism=Toxoplasma_gondii_GT1 | gene_product=eIF2 kinase IF2K-D (Incomplete catalytic triad) [Source:UniProtKB/TrEMBL;Acc:S7VSV8] | transcript_product=eIF2 kinase IF2K-D (incomplete catalytic triad) | location=TGGT1_chrIV:783142-801696(+) | protein_length=2886 | sequence_SO=chromosome | SO=protein_coding_gene | is_pseudo=false	0	2125.09	18	0.972	0.939	0.986	0.95	0.923	0.891	0.936	0.929	0.654	1.062	-0.04	-0.09	-0.02	-0.07	-0.12	-0.17	-0.1	-0.11	-0.61	0.09	0.869179	0.819279	0.970047	0.897384	0.730583	0.45427	0.127716	0.892292	0.208851	0.7794	0.983497
FALSE	High	LSPVAADSPGLDHARPTLDTLR	[K].LSPVAADSPGLDHARPTLDTLR.[Y]	1xTMTpro [N-Term]; 1xPhospho [S8(100)]	1xTMTpro [N-Term]; 1xPhospho [S2(0); S8(100); T17(0); T20(0)]	8.75495e-08	5.34993e-05	1	1	2	TGGT1_262150-t26_1-p1	TGGT1_262150-t26_1-p1 [30-51]	TGGT1_262150-t26_1-p1 1xPhospho [S31(0); S37(100); T46(0); T49(0)]	TGGT1_262150-t26_1-p1 1xPhospho [S37(100)]	transcript=TGGT1_262150-t26_1 | gene=TGGT1_262150 | organism=Toxoplasma_gondii_GT1 | gene_product=BTB_2 domain-containing protein [Source:UniProtKB/TrEMBL;Acc:S7WDW6] | transcript_product=kelch repeat and K+ channel tetramerisation domain containing protein | location=TGGT1_chrVIIb:1306190-1314039(-) | protein_length=818 | sequence_SO=chromosome | SO=protein_coding_gene | is_pseudo=false	0	2686.39	22
FALSE	High	LSQAASVAAATPR	[R].LSQAASVAAATPR.[Q]	1xTMTpro [N-Term]; 1xPhospho [T11(100)]	1xTMTpro [N-Term]; 1xPhospho [S2(0); S6(0); T11(100)]	0.000361268	5.34993e-05	1	1	1	TGGT1_208400B-t26_1-p1	TGGT1_208400B-t26_1-p1 [709-721]	TGGT1_208400B-t26_1-p1 1xPhospho [S710(0); S714(0); T719(100)]	TGGT1_208400B-t26_1-p1 1xPhospho [T719(100)]	transcript=TGGT1_208400B-t26_1 | gene=TGGT1_208400B | organism=Toxoplasma_gondii_GT1 | gene_product=hypothetical protein | transcript_product=hypothetical protein | location=TGGT1_chrIb:671628-681222(-) | protein_length=1824 | sequence_SO=chromosome | SO=protein_coding_gene | is_pseudo=false	0	1626.85	13	0.985	0.726	0.633	1.02	1.005	0.74	0.646	0.977	0.722	0.722	-0.02	-0.46	-0.66	0.03	0.01	-0.43	-0.63	-0.03	-0.47	-0.47	0.916948	0.0516958	0.065134	0.904841	0.987459	0.209171	0.11769	0.936224	0.2711	0.0839599	0.988561
FALSE	High	LSQDAMSDDRGEDETEGGR	[R].LSQDAMSDDRGEDETEGGR.[R]	1xTMTpro [N-Term]; 1xPhospho [S7(100)]	1xTMTpro [N-Term]; 1xPhospho [S2(0); S7(100); T15(0)]	9.88074e-06	5.34993e-05	1	1	1	TGGT1_226470-t26_1-p1	TGGT1_226470-t26_1-p1 [87-105]	TGGT1_226470-t26_1-p1 1xPhospho [S88(0); S93(100); T101(0)]	TGGT1_226470-t26_1-p1 1xPhospho [S93(100)]	transcript=TGGT1_226470-t26_1 | gene=TGGT1_226470 | organism=Toxoplasma_gondii_GT1 | gene_product=hypothetical protein | transcript_product=hypothetical protein | location=TGGT1_chrX:1515287-1525417(+) | protein_length=3207 | sequence_SO=chromosome | SO=protein_coding_gene | is_pseudo=false	1	2452.03	19	0.826	0.851	0.953	1.153	0.952	0.981	1.098	1.137	0.77	1.04	-0.28	-0.23	-0.07	0.21	-0.07	-0.03	0.13	0.18	-0.38	0.06	0.222481	0.312711	0.143909	0.272541	0.778683	0.53443	0.331788	0.324471	0.162465	0.600969	0.900211
FALSE	High	LSQDMIPVSPPHTGAGR	[R].LSQDMIPVSPPHTGAGR.[Q]	1xTMTpro [N-Term]; 1xPhospho [S9(100)]	1xTMTpro [N-Term]; 1xPhospho [S2(0); S9(100); T13(0)]	6.20363e-07	5.34993e-05	1	1	2	TGGT1_227450-t26_1-p1	TGGT1_227450-t26_1-p1 [2005-2021]	TGGT1_227450-t26_1-p1 1xPhospho [S2006(0); S2013(100); T2017(0)]	TGGT1_227450-t26_1-p1 1xPhospho [S2013(100)]	transcript=TGGT1_227450-t26_1 | gene=TGGT1_227450 | organism=Toxoplasma_gondii_GT1 | gene_product=Nudix hydrolase domain-containing protein [Source:UniProtKB/TrEMBL;Acc:S7UXE1] | transcript_product=hydrolase, NUDIX family protein | location=TGGT1_chrX:834070-841020(+) | protein_length=2063 | sequence_SO=chromosome | SO=protein_coding_gene | is_pseudo=false	0	2147.06	17	1.083	0.995	0.987	0.922	0.999	0.918	0.91	0.897	1.043	1.078	0.12	-0.01	-0.02	-0.12	0	-0.12	-0.14	-0.16	0.06	0.11	0.344605	0.948941	0.849477	0.114169	0.992964	0.292584	0.409154	0.296536	0.22802	0.659349	0.9065
FALSE	High	ISQFFDDVEAGK	[K].ISQFFDDVEAGK.[I]	1xTMTpro [K12]; 1xTMTpro [N-Term]	1xTMTpro [K12]; 1xTMTpro [N-Term]	4.84954e-07	5.34993e-05	1	1	1	TGGT1_211680-t26_1-p1	TGGT1_211680-t26_1-p1 [323-334]			transcript=TGGT1_211680-t26_1 | gene=TGGT1_211680 | organism=Toxoplasma_gondii_GT1 | gene_product=Protein disulfide-isomerase [Source:UniProtKB/TrEMBL;Acc:A0A125YQI9] | transcript_product=protein disulfide isomerase | location=TGGT1_chrIV:1556190-1558014(+) | protein_length=471 | sequence_SO=chromosome | SO=protein_coding_gene | is_pseudo=false	0	1964.06	12	0.989	1.044	1.221	0.959	0.948	1.002	1.172	1.38	2.765	1.367	-0.02	0.06	0.29	-0.06	-0.08	0	0.23	0.46	1.47	0.45	0.959626	0.825236	0.284001	0.363764	0.782869	0.991111	0.261138	0.437284	0.188195	0.340464	0.994414
FALSE	High	LSQGSENGDAEEEVR	[R].LSQGSENGDAEEEVR.[E]	1xTMTpro [N-Term]	1xTMTpro [N-Term]	3.99574e-06	5.34993e-05	1	1	2	TGGT1_214210-t26_1-p1	TGGT1_214210-t26_1-p1 [477-491]			transcript=TGGT1_214210-t26_1 | gene=TGGT1_214210 | organism=Toxoplasma_gondii_GT1 | gene_product=PUA domain-containing protein [Source:UniProtKB/TrEMBL;Acc:A0A125YRK0] | transcript_product=rRNA pseudouridine synthase | location=TGGT1_chrX:6002905-6008379(-) | protein_length=505 | sequence_SO=chromosome | SO=protein_coding_gene | is_pseudo=false	0	1923.92	15
FALSE	High	LSQGSENGDAEEEVR	[R].LSQGSENGDAEEEVR.[E]	1xTMTpro [N-Term]; 1xPhospho [S5(100)]	1xTMTpro [N-Term]; 1xPhospho [S2(0); S5(100)]	1.39484e-06	5.34993e-05	1	1	8	TGGT1_214210-t26_1-p1	TGGT1_214210-t26_1-p1 [477-491]	TGGT1_214210-t26_1-p1 1xPhospho [S478(0); S481(100)]	TGGT1_214210-t26_1-p1 1xPhospho [S481(100)]	transcript=TGGT1_214210-t26_1 | gene=TGGT1_214210 | organism=Toxoplasma_gondii_GT1 | gene_product=PUA domain-containing protein [Source:UniProtKB/TrEMBL;Acc:A0A125YRK0] | transcript_product=rRNA pseudouridine synthase | location=TGGT1_chrX:6002905-6008379(-) | protein_length=505 | sequence_SO=chromosome | SO=protein_coding_gene | is_pseudo=false	0	2003.89	15	0.989	1.06	0.921	1.013	1.002	1.074	0.933	1.062	0.919	0.992	-0.02	0.08	-0.12	0.02	0	0.1	-0.1	0.09	-0.12	-0.01	0.367756	0.192923	0.364569	0.859963	0.97029	0.524737	0.647321	0.801891	0.112851	0.900961	0.90924
FALSE	High	ISQQAYNQAGSTDSSAGSEGTGSESGDK	[K].ISQQAYNQAGSTDSSAGSEGTGSESGDK.[K]	1xTMTpro [K28]; 1xTMTpro [N-Term]	1xTMTpro [K28]; 1xTMTpro [N-Term]	6.30512e-16	5.34993e-05	1	1	4	TGGT1_251780-t26_1-p1	TGGT1_251780-t26_1-p1 [698-725]			transcript=TGGT1_251780-t26_1 | gene=TGGT1_251780 | organism=Toxoplasma_gondii_GT1 | gene_product=Heat shock protein [Source:UniProtKB/TrEMBL;Acc:S7V012] | transcript_product=heat shock protein | location=TGGT1_chrXII:5504595-5509577(-) | protein_length=728 | sequence_SO=chromosome | SO=protein_coding_gene | is_pseudo=false	0	3327.57	28
FALSE	High	ISQQAYNQAGSTDSSAGSEGTGSESGDKK	[K].ISQQAYNQAGSTDSSAGSEGTGSESGDKK.[S]	2xTMTpro [K28; K29]; 1xTMTpro [N-Term]	2xTMTpro [K28; K29]; 1xTMTpro [N-Term]	4.19751e-12	5.34993e-05	1	1	2	TGGT1_251780-t26_1-p1	TGGT1_251780-t26_1-p1 [698-726]			transcript=TGGT1_251780-t26_1 | gene=TGGT1_251780 | organism=Toxoplasma_gondii_GT1 | gene_product=Heat shock protein [Source:UniProtKB/TrEMBL;Acc:S7V012] | transcript_product=heat shock protein | location=TGGT1_chrXII:5504595-5509577(-) | protein_length=728 | sequence_SO=chromosome | SO=protein_coding_gene | is_pseudo=false	1	3759.87	29
FALSE	High	LSQSTDEGRPDLTGCGSCSPR	[R].LSQSTDEGRPDLTGCGSCSPR.[G]	2xMethylthio [C15; C18]; 1xTMTpro [N-Term]; 1xPhospho [S19(100)]	2xMethylthio [C15; C18]; 1xTMTpro [N-Term]; 1xPhospho [S2(0); S4(0); T5(0); T13(0); S17(0); S19(100)]	3.36793e-05	5.34993e-05	1	1	2	TGGT1_220920-t26_1-p1	TGGT1_220920-t26_1-p1 [46-66]	TGGT1_220920-t26_1-p1 2xMethylthio [C60; C63]; 1xPhospho [S47(0); S49(0); T50(0); T58(0); S62(0); S64(100)]	TGGT1_220920-t26_1-p1 2xMethylthio [C60; C63]; 1xPhospho [S64(100)]	transcript=TGGT1_220920-t26_1 | gene=TGGT1_220920 | organism=Toxoplasma_gondii_GT1 | gene_product=hypothetical protein | transcript_product=hypothetical protein | location=TGGT1_chrII:47191-52236(+) | protein_length=1681 | sequence_SO=chromosome | SO=protein_coding_gene | is_pseudo=false	0	2642.1	21	0.888	0.787	0.638	1.051	0.933	0.827	0.67	0.923	0.734	0.709	-0.17	-0.35	-0.65	0.07	-0.1	-0.27	-0.58	-0.12	-0.45	-0.5	0.370784	0.277971	0.0531561	0.088902	0.564329	0.355288	0.0487191	0.126942	0.0827302	0.0268499	0.909509
FALSE	High	ISQWGEGEEGDLDASGGEER	[K].ISQWGEGEEGDLDASGGEER.[V]	1xTMTpro [N-Term]; 1xPhospho [S15(100)]	1xTMTpro [N-Term]; 1xPhospho [S2(0); S15(100)]	0.000190274	5.34993e-05	1	1	1	TGGT1_232360-t26_1-p1	TGGT1_232360-t26_1-p1 [1855-1874]	TGGT1_232360-t26_1-p1 1xPhospho [S1856(0); S1869(100)]	TGGT1_232360-t26_1-p1 1xPhospho [S1869(100)]	transcript=TGGT1_232360-t26_1 | gene=TGGT1_232360 | organism=Toxoplasma_gondii_GT1 | gene_product=Exonuclease domain-containing protein [Source:UniProtKB/TrEMBL;Acc:S7V3A2] | transcript_product=exonuclease | location=TGGT1_chrVIII:2028967-2043066(-) | protein_length=2587 | sequence_SO=chromosome | SO=protein_coding_gene | is_pseudo=false	0	2505.07	20
FALSE	High	ISPSSPTLSPVWR	[R].ISPSSPTLSPVWR.[A]	1xTMTpro [N-Term]; 1xPhospho [S5(99)]	1xTMTpro [N-Term]; 1xPhospho [S2(0.5); S4(0.5); S5(99); T7(0); S9(0)]	1.35744e-05	5.34993e-05	1	1	1	TGGT1_220910-t26_1-p1	TGGT1_220910-t26_1-p1 [1621-1633]	TGGT1_220910-t26_1-p1 1xPhospho [S1622(0.5); S1624(0.5); S1625(99); T1627(0); S1629(0)]	TGGT1_220910-t26_1-p1 1xPhospho [S1625(99)]	transcript=TGGT1_220910-t26_1 | gene=TGGT1_220910 | organism=Toxoplasma_gondii_GT1 | gene_product=HEAT repeat-containing protein [Source:UniProtKB/TrEMBL;Acc:S7W0F3] | transcript_product=HEAT repeat-containing protein | location=TGGT1_chrII:31697-44955(-) | protein_length=1769 | sequence_SO=chromosome | SO=protein_coding_gene | is_pseudo=false	0	1810.94	13
FALSE	High	LSLHSAFASGGALK	[R].LSLHSAFASGGALK.[E]	1xTMTpro [K14]; 1xTMTpro [N-Term]; 1xPhospho [S2(100)]	1xTMTpro [K14]; 1xTMTpro [N-Term]; 1xPhospho [S2(100); S5(0); S9(0)]	4.6055e-07	5.34993e-05	1	1	1	TGGT1_249260-t26_1-p1	TGGT1_249260-t26_1-p1 [1211-1224]	TGGT1_249260-t26_1-p1 1xPhospho [S1212(100); S1215(0); S1219(0)]	TGGT1_249260-t26_1-p1 1xPhospho [S1212(100)]	transcript=TGGT1_249260-t26_1 | gene=TGGT1_249260 | organism=Toxoplasma_gondii_GT1 | gene_product=Protein kinase domain-containing protein [Source:UniProtKB/TrEMBL;Acc:S7W928] | transcript_product=putative cell-cycle-associated protein kinase CDK | location=TGGT1_chrXII:4333758-4345741(-) | protein_length=1910 | sequence_SO=chromosome | SO=protein_coding_gene | is_pseudo=false	0	2047.12	14	1.1	1.078	0.848	1.063	1.169	1.146	0.902	1.034	1.123	1.192	0.14	0.11	-0.24	0.09	0.23	0.2	-0.15	0.05	0.17	0.25	0.470769	0.225242	0.598228	0.466641	0.130463	0.346863	0.651874	0.857814	0.635463	0.198946	0.919077
FALSE	High	LSLGSHEASLPER	[R].LSLGSHEASLPER.[D]	1xTMTpro [N-Term]; 1xPhospho [S2(100)]	1xTMTpro [N-Term]; 1xPhospho [S2(100); S5(0); S9(0)]	4.77397e-05	5.34993e-05	1	1	1	TGGT1_223880-t26_1-p1	TGGT1_223880-t26_1-p1 [3220-3232]	TGGT1_223880-t26_1-p1 1xPhospho [S3221(100); S3224(0); S3228(0)]	TGGT1_223880-t26_1-p1 1xPhospho [S3221(100)]	transcript=TGGT1_223880-t26_1 | gene=TGGT1_223880 | organism=Toxoplasma_gondii_GT1 | gene_product=RING-type domain-containing protein [Source:UniProtKB/TrEMBL;Acc:S7UVV4] | transcript_product=zinc finger, C3HC4 type (RING finger) domain-containing protein | location=TGGT1_chrX:3392353-3413350(-) | protein_length=3893 | sequence_SO=chromosome | SO=protein_coding_gene | is_pseudo=false	0	1779.9	13
FALSE	High	ISIGQSDYGYR	[R].ISIGQSDYGYR.[S]	1xTMTpro [N-Term]; 1xPhospho [S2(100)]	1xTMTpro [N-Term]; 1xPhospho [S2(100); S6(0); Y8(0); Y10(0)]	0.000284873	5.34993e-05	1	1	3	TGGT1_260825-t26_1-p1	TGGT1_260825-t26_1-p1 [76-86]	TGGT1_260825-t26_1-p1 1xPhospho [S77(100); S81(0); Y83(0); Y85(0)]	TGGT1_260825-t26_1-p1 1xPhospho [S77(100)]	transcript=TGGT1_260825-t26_1 | gene=TGGT1_260825 | organism=Toxoplasma_gondii_GT1 | gene_product=hypothetical protein | transcript_product=hypothetical protein | location=TGGT1_chrVIIb:1996744-1997638(-) | protein_length=92 | sequence_SO=chromosome | SO=protein_coding_gene | is_pseudo=false	0	1642.78	11
FALSE	High	LSETHGDEATGAGGSEGGR	[R].LSETHGDEATGAGGSEGGR.[L]	1xTMTpro [N-Term]; 1xPhospho [S15(100)]	1xTMTpro [N-Term]; 1xPhospho [S2(0); T4(0); T10(0); S15(100)]	7.71002e-08	5.34993e-05	1	1	3	TGGT1_215700-t26_1-p1	TGGT1_215700-t26_1-p1 [1925-1943]	TGGT1_215700-t26_1-p1 1xPhospho [S1926(0); T1928(0); T1934(0); S1939(100)]	TGGT1_215700-t26_1-p1 1xPhospho [S1939(100)]	transcript=TGGT1_215700-t26_1 | gene=TGGT1_215700 | organism=Toxoplasma_gondii_GT1 | gene_product=Phosphatidylinositol 3-and 4-kinase [Source:UniProtKB/TrEMBL;Acc:S7W5A1] | transcript_product=phosphatidylinositol 3- and 4-kinase | location=TGGT1_chrX:6992178-7006444(-) | protein_length=2981 | sequence_SO=chromosome | SO=protein_coding_gene | is_pseudo=false	0	2171.95	19
FALSE	High	LSFLEGEEETEPETAR	[R].LSFLEGEEETEPETAR.[A]	1xTMTpro [N-Term]; 1xPhospho [S2(100)]	1xTMTpro [N-Term]; 1xPhospho [S2(100); T10(0); T14(0)]	1.253e-06	5.34993e-05	1	1	2	TGGT1_310802-t26_1-p1	TGGT1_310802-t26_1-p1 [161-176]	TGGT1_310802-t26_1-p1 1xPhospho [S162(100); T170(0); T174(0)]	TGGT1_310802-t26_1-p1 1xPhospho [S162(100)]	transcript=TGGT1_310802-t26_1 | gene=TGGT1_310802 | organism=Toxoplasma_gondii_GT1 | gene_product=CRAL-TRIO domain-containing protein [Source:UniProtKB/TrEMBL;Acc:S7W265] | transcript_product=CRAL/TRIO domain-containing protein | location=TGGT1_chrXI:1562990-1566501(+) | protein_length=499 | sequence_SO=chromosome | SO=protein_coding_gene | is_pseudo=false	0	2221.02	16
FALSE	High	ISFPLLADVSHK	[K].ISFPLLADVSHK.[M]	1xTMTpro [K12]; 1xTMTpro [N-Term]	1xTMTpro [K12]; 1xTMTpro [N-Term]	2.91682e-07	5.34993e-05	1	1	1	TGGT1_217890-t26_1-p1	TGGT1_217890-t26_1-p1 [99-110]			transcript=TGGT1_217890-t26_1 | gene=TGGT1_217890 | organism=Toxoplasma_gondii_GT1 | gene_product=Peroxiredoxin [Source:UniProtKB/TrEMBL;Acc:A0A125YNG7] | transcript_product=putative alkyl hydroperoxide reductase/ Thiol specific antioxidant/ Mal allergen | location=TGGT1_chrXII:2143499-2144089(-) | protein_length=196 | sequence_SO=chromosome | SO=protein_coding_gene | is_pseudo=false	0	1935.16	12	0.976	1.081	0.786	0.886	0.865	0.958	0.696	0.957	0.782	0.968	-0.03	0.11	-0.35	-0.17	-0.21	-0.06	-0.52	-0.06	-0.35	-0.05	0.784726	0.566376	0.615146	0.565329	0.321648	0.563387	0.322168	0.832573	0.660846	0.145494	0.971354
FALSE	High	LSGAEEGCQYEIAK	[K].LSGAEEGCQYEIAK.[S]	1xMethylthio [C8]; 1xTMTpro [K14]; 1xTMTpro [N-Term]; 1xPhospho [S2(100)]	1xMethylthio [C8]; 1xTMTpro [K14]; 1xTMTpro [N-Term]; 1xPhospho [S2(100); Y10(0)]	6.53808e-06	5.34993e-05	1	1	1	TGGT1_204490-t26_1-p1	TGGT1_204490-t26_1-p1 [43-56]	TGGT1_204490-t26_1-p1 1xMethylthio [C50]; 1xPhospho [S44(100); Y52(0)]	TGGT1_204490-t26_1-p1 1xMethylthio [C50]; 1xPhospho [S44(100)]	transcript=TGGT1_204490-t26_1 | gene=TGGT1_204490 | organism=Toxoplasma_gondii_GT1 | gene_product=hypothetical protein | transcript_product=hypothetical protein | location=TGGT1_chrVIIa:1651032-1653481(-) | protein_length=272 | sequence_SO=chromosome | SO=protein_coding_gene | is_pseudo=false	0	2232.06	14	0.964	0.945	0.943	1.144	1.102	1.08	1.078	1.071	0.976	1.122	-0.05	-0.08	-0.09	0.19	0.14	0.11	0.11	0.1	-0.03	0.17	0.861895	0.584379	0.759701	0.0376405	0.65338	0.521725	0.688615	0.0191242	0.829341	0.655822	0.98141
FALSE	High	LSGATVGALTTTSSGADEDKR	[K].LSGATVGALTTTSSGADEDKR.[Q]	1xTMTpro [K20]; 1xTMTpro [N-Term]; 1xPhospho [S14(99.7)]	1xTMTpro [K20]; 1xTMTpro [N-Term]; 1xPhospho [S2(0); T5(0); T10(0); T11(0); T12(0); S13(0.3); S14(99.7)]	1.29306e-10	5.34993e-05	1	1	2	TGGT1_294640-t26_1-p1	TGGT1_294640-t26_1-p1 [823-843]	TGGT1_294640-t26_1-p1 1xPhospho [S824(0); T827(0); T832(0); T833(0); T834(0); S835(0.3); S836(99.7)]	TGGT1_294640-t26_1-p1 1xPhospho [S836(99.7)]	transcript=TGGT1_294640-t26_1 | gene=TGGT1_294640 | organism=Toxoplasma_gondii_GT1 | gene_product=Ribonucleoside-diphosphate reductase [Source:UniProtKB/TrEMBL;Acc:A0A125YNJ0] | transcript_product=ribonucleoside-diphosphate reductase large chain | location=TGGT1_chrIa:1013691-1019168(+) | protein_length=877 | sequence_SO=chromosome | SO=protein_coding_gene | is_pseudo=false	1	2725.39	21	1.042	0.916	0.905	1.041	1.085	0.954	0.942	0.955	0.962	0.925	0.06	-0.13	-0.14	0.06	0.12	-0.07	-0.09	-0.07	-0.06	-0.11	0.838095	0.236077	0.629589	0.418306	0.636695	0.598647	0.707824	0.118899	0.193625	0.628693	0.977467
FALSE	High	LSGAVEELEAER	[R].LSGAVEELEAER.[A]	1xTMTpro [N-Term]; 1xPhospho [S2(100)]	1xTMTpro [N-Term]; 1xPhospho [S2(100)]	3.24983e-05	5.34993e-05	1	1	1	TGGT1_208340-t26_1-p1	TGGT1_208340-t26_1-p1 [995-1006]	TGGT1_208340-t26_1-p1 1xPhospho [S996(100)]	TGGT1_208340-t26_1-p1 1xPhospho [S996(100)]	transcript=TGGT1_208340-t26_1 | gene=TGGT1_208340 | organism=Toxoplasma_gondii_GT1 | gene_product=PH domain-containing protein [Source:UniProtKB/TrEMBL;Acc:S7VSI6] | transcript_product=hypothetical protein | location=TGGT1_chrIb:630106-638623(+) | protein_length=1285 | sequence_SO=chromosome | SO=protein_coding_gene | is_pseudo=false	0	1686.83	12	0.966	1.582	1.195	1.668	1.611	2.638	1.993	1.036	2.247	2.566	-0.05	0.66	0.26	0.74	0.69	1.4	0.99	0.05	1.17	1.36	0.828327	0.14371	0.736551	0.158739	0.00712158	0.151655	0.420678	0.472871	0.388944	0.243731	0.976273
FALSE	High	LSGDSCDSDDEAQGTGR	[R].LSGDSCDSDDEAQGTGR.[D]	1xMethylthio [C6]; 1xTMTpro [N-Term]; 1xPhospho [S8(100)]	1xMethylthio [C6]; 1xTMTpro [N-Term]; 1xPhospho [S2(0); S5(0); S8(100); T15(0)]	1.9318e-06	5.34993e-05	1	1	2	TGGT1_288880-t26_1-p1	TGGT1_288880-t26_1-p1 [242-258]	TGGT1_288880-t26_1-p1 1xMethylthio [C247]; 1xPhospho [S243(0); S246(0); S249(100); T256(0)]	TGGT1_288880-t26_1-p1 1xMethylthio [C247]; 1xPhospho [S249(100)]	transcript=TGGT1_288880-t26_1 | gene=TGGT1_288880 | organism=Toxoplasma_gondii_GT1 | gene_product=hypothetical protein | transcript_product=hypothetical protein | location=TGGT1_chrIX:2596601-2599504(+) | protein_length=654 | sequence_SO=chromosome | SO=protein_coding_gene | is_pseudo=false	0	2142.83	17
FALSE	High	LSGEETPAAGQGEAR	[R].LSGEETPAAGQGEAR.[E]	1xTMTpro [N-Term]; 1xPhospho [T6(100)]	1xTMTpro [N-Term]; 1xPhospho [S2(0); T6(100)]	6.69572e-06	5.34993e-05	1	1	3	TGGT1_234230-t26_1-p1	TGGT1_234230-t26_1-p1 [3185-3199]	TGGT1_234230-t26_1-p1 1xPhospho [S3186(0); T3190(100)]	TGGT1_234230-t26_1-p1 1xPhospho [T3190(100)]	transcript=TGGT1_234230-t26_1 | gene=TGGT1_234230 | organism=Toxoplasma_gondii_GT1 | gene_product=hypothetical protein | transcript_product=hypothetical protein | location=TGGT1_chrX:4104920-4121364(-) | protein_length=4625 | sequence_SO=chromosome | SO=protein_coding_gene | is_pseudo=false	0	1856.87	15	1.194	1.414	1.428	0.873	1.043	1.234	1.247	0.97	1.189	1.26	0.26	0.5	0.51	-0.2	0.06	0.3	0.32	-0.04	0.25	0.33	0.0858244	0.176741	0.171063	0.707792	0.894675	0.67323	0.659814	0.884172	0.6362	0.609846	0.8946
FALSE	High	ISGLIYEEIR	[R].ISGLIYEEIR.[G]	1xTMTpro [N-Term]	1xTMTpro [N-Term]	1.04041e-05	5.34993e-05	1	1	2	TGGT1_239260-t26_1-p1	TGGT1_239260-t26_1-p1 [47-56]			transcript=TGGT1_239260-t26_1 | gene=TGGT1_239260 | organism=Toxoplasma_gondii_GT1 | gene_product=Histone H4 [Source:UniProtKB/TrEMBL;Acc:A0A125YHU3] | transcript_product=histone H4 | location=TGGT1_chrVI:491746-492057(-) | protein_length=103 | sequence_SO=chromosome | SO=protein_coding_gene | is_pseudo=false	0	1496.86	10	0.97	0.933	0.941	1.012	0.981	0.944	0.952	0.854	0.906	0.862	-0.04	-0.1	-0.09	0.02	-0.03	-0.08	-0.07	-0.23	-0.14	-0.21	0.224172	0.0813323	0.555094	0.897061	0.860409	0.607715	0.00076349	0.29718	0.482996	0.423309	0.900211
FALSE	High	LSGPAPASPGACDDCGQSR	[R].LSGPAPASPGACDDCGQSR.[E]	2xMethylthio [C12; C15]; 1xTMTpro [N-Term]; 1xPhospho [S8(100)]	2xMethylthio [C12; C15]; 1xTMTpro [N-Term]; 1xPhospho [S2(0); S8(100); S18(0)]	2.11657e-06	5.34993e-05	1	1	1	TGGT1_223610-t26_1-p1	TGGT1_223610-t26_1-p1 [226-244]	TGGT1_223610-t26_1-p1 2xMethylthio [C237; C240]; 1xPhospho [S227(0); S233(100); S243(0)]	TGGT1_223610-t26_1-p1 2xMethylthio [C237; C240]; 1xPhospho [S233(100)]	transcript=TGGT1_223610-t26_1 | gene=TGGT1_223610 | organism=Toxoplasma_gondii_GT1 | gene_product=hypothetical protein | transcript_product=hypothetical protein | location=TGGT1_chrX:3601437-3606218(-) | protein_length=1303 | sequence_SO=chromosome | SO=protein_coding_gene | is_pseudo=false	0	2264.91	19
FALSE	High	LSGPGVHTPAPAYPAVYVHPGR	[R].LSGPGVHTPAPAYPAVYVHPGR.[L]	1xTMTpro [N-Term]; 1xPhospho [S2(100)]	1xTMTpro [N-Term]; 1xPhospho [S2(100); T8(0); Y13(0); Y17(0)]	3.62895e-07	5.34993e-05	1	1	1	TGGT1_228280-t26_1-p1	TGGT1_228280-t26_1-p1 [241-262]	TGGT1_228280-t26_1-p1 1xPhospho [S242(100); T248(0); Y253(0); Y257(0)]	TGGT1_228280-t26_1-p1 1xPhospho [S242(100)]	transcript=TGGT1_228280-t26_1 | gene=TGGT1_228280 | organism=Toxoplasma_gondii_GT1 | gene_product=hypothetical protein | transcript_product=hypothetical protein | location=TGGT1_chrX:351589-353173(+) | protein_length=386 | sequence_SO=chromosome | SO=protein_coding_gene | is_pseudo=false	0	2627.35	22	1.053	1.292	1.105	0.707	0.745	0.914	0.782	0.964	0.901	0.816	0.07	0.37	0.14	-0.5	-0.42	-0.13	-0.35	-0.05	-0.15	-0.29	0.45551	0.532253	0.378926	0.482207	0.486677	0.288311	0.516973	0.772209	0.0797396	0.515289	0.91698
FALSE	High	LSGQFPESCLNSYPAQNFVR	[R].LSGQFPESCLNSYPAQNFVR.[S]	1xMethylthio [C9]; 1xTMTpro [N-Term]; 1xPhospho [S2(100)]	1xMethylthio [C9]; 1xTMTpro [N-Term]; 1xPhospho [S2(100); S8(0); S12(0); Y13(0)]	1.01998e-09	5.34993e-05	1	1	1	TGGT1_218730-t26_1-p1	TGGT1_218730-t26_1-p1 [135-154]	TGGT1_218730-t26_1-p1 1xMethylthio [C143]; 1xPhospho [S136(100); S142(0); S146(0); Y147(0)]	TGGT1_218730-t26_1-p1 1xMethylthio [C143]; 1xPhospho [S136(100)]	transcript=TGGT1_218730-t26_1 | gene=TGGT1_218730 | organism=Toxoplasma_gondii_GT1 | gene_product=hypothetical protein | transcript_product=hypothetical protein | location=TGGT1_chrXII:1285339-1286622(+) | protein_length=256 | sequence_SO=chromosome | SO=protein_coding_gene | is_pseudo=false	0	2687.23	20
FALSE	High	LSGSHELPDAGTVGK	[K].LSGSHELPDAGTVGK.[D]	1xTMTpro [K15]; 1xTMTpro [N-Term]; 1xPhospho [S/T]	1xTMTpro [K15]; 1xTMTpro [N-Term]; 1xPhospho [S2(50); S4(50); T12(0)]	0.000316511	5.34993e-05	1	1	1	TGGT1_304970-t26_1-p1	TGGT1_304970-t26_1-p1 [36-50]			transcript=TGGT1_304970-t26_1 | gene=TGGT1_304970 | organism=Toxoplasma_gondii_GT1 | gene_product=Protein kinase domain-containing protein [Source:UniProtKB/TrEMBL;Acc:S7UI68] | transcript_product=putative cell-cycle-associated protein kinase CDK | location=TGGT1_chrIX:4910810-4921648(+) | protein_length=1373 | sequence_SO=chromosome | SO=protein_coding_gene | is_pseudo=false	0	2156.12	15	1.127	0.994	1.097	1.006	1.134	1	1.103	0.979	1.356	1.394	0.17	-0.01	0.13	0.01	0.18	0	0.14	-0.03	0.44	0.48	0.757938	0.988122	0.659114	0.692189	0.739249	0.999496	0.621328	0.944432	0.44072	0.282427	0.964232
FALSE	High	ISGSREEDGDSSRPQIESVNR	[K].ISGSREEDGDSSRPQIESVNR.[R]	1xTMTpro [N-Term]; 1xPhospho [S4(99.4)]	1xTMTpro [N-Term]; 1xPhospho [S2(0.6); S4(99.4); S11(0); S12(0); S18(0)]	1.62509e-08	5.34993e-05	1	1	12	TGGT1_248420-t26_1-p1	TGGT1_248420-t26_1-p1 [430-450]	TGGT1_248420-t26_1-p1 1xPhospho [S431(0.6); S433(99.4); S440(0); S441(0); S447(0)]	TGGT1_248420-t26_1-p1 1xPhospho [S433(99.4)]	transcript=TGGT1_248420-t26_1 | gene=TGGT1_248420 | organism=Toxoplasma_gondii_GT1 | gene_product=hypothetical protein | transcript_product=hypothetical protein | location=TGGT1_chrXII:3772416-3776263(-) | protein_length=728 | sequence_SO=chromosome | SO=protein_coding_gene | is_pseudo=false	1	2702.27	21	0.995	1.071	1.174	1.19	1.184	1.274	1.398	1.003	0.996	1.201	-0.01	0.1	0.23	0.25	0.24	0.35	0.48	0	-0.01	0.26	0.958711	0.581685	0.261253	0.28012	0.0157492	0.0182189	0.0226119	0.800654	0.954582	0.0535022	0.994414
FALSE	High	ISGSREEDGDSSRPQIESVNR	[K].ISGSREEDGDSSRPQIESVNR.[R]	1xTMTpro [N-Term]; 2xPhospho [S11(100); S]	1xTMTpro [N-Term]; 2xPhospho [S2(50); S4(50); S11(100); S12(0); S18(0)]	9.05404e-10	5.34993e-05	1	1	5	TGGT1_248420-t26_1-p1	TGGT1_248420-t26_1-p1 [430-450]	TGGT1_248420-t26_1-p1 2xPhospho [S431(50); S433(50); S440(100); S441(0); S447(0)]	TGGT1_248420-t26_1-p1 2xPhospho [S440(100); S]	transcript=TGGT1_248420-t26_1 | gene=TGGT1_248420 | organism=Toxoplasma_gondii_GT1 | gene_product=hypothetical protein | transcript_product=hypothetical protein | location=TGGT1_chrXII:3772416-3776263(-) | protein_length=728 | sequence_SO=chromosome | SO=protein_coding_gene | is_pseudo=false	1	2782.24	21	0.982	1.067	1.025	1.158	1.136	1.235	1.187	0.973	1.063	1.02	-0.03	0.09	0.04	0.21	0.18	0.3	0.25	-0.04	0.09	0.03	0.691139	0.277158	0.890752	0.157421	0.00764586	0.0209497	0.355912	0.691817	0.463843	0.901795	0.95308
FALSE	High	LSHAESELDSEGEGAER	[R].LSHAESELDSEGEGAER.[K]	1xTMTpro [N-Term]; 1xPhospho [S10(100)]	1xTMTpro [N-Term]; 1xPhospho [S2(0); S6(0); S10(100)]	1.65891e-11	5.34993e-05	1	1	4	TGGT1_242415-t26_1-p1	TGGT1_242415-t26_1-p1 [2487-2503]	TGGT1_242415-t26_1-p1 1xPhospho [S2488(0); S2492(0); S2496(100)]	TGGT1_242415-t26_1-p1 1xPhospho [S2496(100)]	transcript=TGGT1_242415-t26_1 | gene=TGGT1_242415 | organism=Toxoplasma_gondii_GT1 | gene_product=Amino_oxidase domain-containing protein [Source:UniProtKB/TrEMBL;Acc:S7URN9] | transcript_product=histone lysine-specific demethylase | location=TGGT1_chrVI:1933154-1950353(+) | protein_length=3802 | sequence_SO=chromosome | SO=protein_coding_gene | is_pseudo=false	0	2199.97	17	1.004	0.996	1.068	0.911	0.915	0.908	0.973	0.957	0.942	0.885	0.01	-0.01	0.09	-0.13	-0.13	-0.14	-0.04	-0.06	-0.09	-0.18	0.973229	0.889874	0.114234	0.081464	0.567664	0.210569	0.454954	0.674729	0.301588	0.416668	0.995188
FALSE	High	LSHAESELDSEGEGAER	[R].LSHAESELDSEGEGAER.[K]	1xTMTpro [N-Term]; 2xPhospho [S6(100); S10(100)]	1xTMTpro [N-Term]; 2xPhospho [S2(0); S6(100); S10(100)]	1.798e-10	5.34993e-05	1	1	2	TGGT1_242415-t26_1-p1	TGGT1_242415-t26_1-p1 [2487-2503]	TGGT1_242415-t26_1-p1 2xPhospho [S2488(0); S2492(100); S2496(100)]	TGGT1_242415-t26_1-p1 2xPhospho [S2492(100); S2496(100)]	transcript=TGGT1_242415-t26_1 | gene=TGGT1_242415 | organism=Toxoplasma_gondii_GT1 | gene_product=Amino_oxidase domain-containing protein [Source:UniProtKB/TrEMBL;Acc:S7URN9] | transcript_product=histone lysine-specific demethylase | location=TGGT1_chrVI:1933154-1950353(+) | protein_length=3802 | sequence_SO=chromosome | SO=protein_coding_gene | is_pseudo=false	0	2279.94	17	0.923	1.002	0.962	1.012	0.934	1.014	0.973	0.863	0.756	0.888	-0.12	0	-0.06	0.02	-0.1	0.02	-0.04	-0.21	-0.4	-0.17	0.328928	0.91727	0.484664	0.91951	0.366886	0.919175	0.86646	0.0800677	0.030412	0.678834	0.9065
FALSE	High	LSHGSSPPSR	[R].LSHGSSPPSR.[E]	1xTMTpro [N-Term]; 2xPhospho [S5(100); S9(100)]	1xTMTpro [N-Term]; 2xPhospho [S2(0); S5(100); S6(0); S9(100)]	0.00012834	5.34993e-05	1	1	3	TGGT1_228660-t26_1-p1	TGGT1_228660-t26_1-p1 [2270-2279]	TGGT1_228660-t26_1-p1 2xPhospho [S2271(0); S2274(100); S2275(0); S2278(100)]	TGGT1_228660-t26_1-p1 2xPhospho [S2274(100); S2278(100)]	transcript=TGGT1_228660-t26_1 | gene=TGGT1_228660 | organism=Toxoplasma_gondii_GT1 | gene_product=SEC7 domain-containing protein [Source:UniProtKB/TrEMBL;Acc:S7UXX0] | transcript_product=Sec7 domain-containing protein | location=TGGT1_chrX:159771-177015(-) | protein_length=3547 | sequence_SO=chromosome | SO=protein_coding_gene | is_pseudo=false	0	1488.66	10	1.113	0.868	0.761	0.753	0.838	0.653	0.573	0.775	0.843	0.561	0.15	-0.2	-0.39	-0.41	-0.26	-0.61	-0.8	-0.37	-0.25	-0.83	0.542055	0.741887	0.319881	0.126235	0.22447	0.363773	0.105199	0.381934	0.338212	0.0542549	0.929498
FALSE	High	LSHLGFESAMK	[R].LSHLGFESAMK.[L]	1xTMTpro [K11]; 1xTMTpro [N-Term]; 1xPhospho [S2(100)]	1xTMTpro [K11]; 1xTMTpro [N-Term]; 1xPhospho [S2(100); S8(0)]	7.94237e-06	5.34993e-05	1	1	1	TGGT1_240910-t26_1-p1	TGGT1_240910-t26_1-p1 [347-357]	TGGT1_240910-t26_1-p1 1xPhospho [S348(100); S354(0)]	TGGT1_240910-t26_1-p1 1xPhospho [S348(100)]	transcript=TGGT1_240910-t26_1 | gene=TGGT1_240910 | organism=Toxoplasma_gondii_GT1 | gene_product=C2 domain-containing protein [Source:UniProtKB/TrEMBL;Acc:S7USF1] | transcript_product=hypothetical protein | location=TGGT1_chrVI:1522402-1546111(-) | protein_length=1910 | sequence_SO=chromosome | SO=protein_coding_gene | is_pseudo=false	0	1907.99	11	1.757	3.364	3.728	10.757	11.429	17.257	19.17	13.564	17.77	18.765	0.81	1.75	1.9	3.43	3.51	4.11	4.26	3.76	4.15	4.23
FALSE	High	LSHLGFESAMK	[R].LSHLGFESAMK.[L]	1xOxidation [M10]; 1xTMTpro [K11]; 1xTMTpro [N-Term]; 1xPhospho [S2(100)]	1xOxidation [M10]; 1xTMTpro [K11]; 1xTMTpro [N-Term]; 1xPhospho [S2(100); S8(0)]	1.20504e-05	5.34993e-05	1	1	3	TGGT1_240910-t26_1-p1	TGGT1_240910-t26_1-p1 [347-357]	TGGT1_240910-t26_1-p1 1xPhospho [S348(100); S354(0)]	TGGT1_240910-t26_1-p1 1xPhospho [S348(100)]	transcript=TGGT1_240910-t26_1 | gene=TGGT1_240910 | organism=Toxoplasma_gondii_GT1 | gene_product=C2 domain-containing protein [Source:UniProtKB/TrEMBL;Acc:S7USF1] | transcript_product=hypothetical protein | location=TGGT1_chrVI:1522402-1546111(-) | protein_length=1910 | sequence_SO=chromosome | SO=protein_coding_gene | is_pseudo=false	0	1923.99	11	1.462	1.837	2.013	1.007	1.473	1.85	2.028	1.792	2.105	2.337	0.55	0.88	1.01	0.01	0.56	0.89	1.02	0.84	1.07	1.22	0.44919	0.125412	0.0375776	0.946074	0.518426	0.0357898	0.114064	0.173281	0.114922	0.0768098	0.915452
FALSE	High	LSHSGASNQTGEEVNSAEER	[R].LSHSGASNQTGEEVNSAEER.[F]	1xTMTpro [N-Term]; 2xPhospho [S7(100); S/T]	1xTMTpro [N-Term]; 2xPhospho [S2(50); S4(50); S7(100); T10(0); S16(0)]	7.7088e-05	5.34993e-05	1	1	2	TGGT1_236850-t26_1-p1	TGGT1_236850-t26_1-p1 [780-799]	TGGT1_236850-t26_1-p1 2xPhospho [S781(50); S783(50); S786(100); T789(0); S795(0)]	TGGT1_236850-t26_1-p1 2xPhospho [S786(100); S/T]	transcript=TGGT1_236850-t26_1 | gene=TGGT1_236850 | organism=Toxoplasma_gondii_GT1 | gene_product=hypothetical protein | transcript_product=hypothetical protein | location=TGGT1_chrX:5428985-5438773(+) | protein_length=2752 | sequence_SO=chromosome | SO=protein_coding_gene | is_pseudo=false	0	2566.08	20
FALSE	High	ISKEESFYSGNSNSLR	[K].ISKEESFYSGNSNSLR.[D]	1xTMTpro [K3]; 1xTMTpro [N-Term]; 1xPhospho [S6(100)]	1xTMTpro [K3]; 1xTMTpro [N-Term]; 1xPhospho [S2(0); S6(100); Y8(0); S9(0); S12(0); S14(0)]	1.70125e-06	5.34993e-05	1	1	1	TGGT1_293190-t26_1-p1	TGGT1_293190-t26_1-p1 [251-266]	TGGT1_293190-t26_1-p1 1xPhospho [S252(0); S256(100); Y258(0); S259(0); S262(0); S264(0)]	TGGT1_293190-t26_1-p1 1xPhospho [S256(100)]	transcript=TGGT1_293190-t26_1 | gene=TGGT1_293190 | organism=Toxoplasma_gondii_GT1 | gene_product=IPPc domain-containing protein [Source:UniProtKB/TrEMBL;Acc:A0A125YFF1] | transcript_product=endonuclease/exonuclease/phosphatase family protein | location=TGGT1_chrIa:133494-141236(+) | protein_length=682 | sequence_SO=chromosome | SO=protein_coding_gene | is_pseudo=false	1	2506.25	16	2.11	4.183	4.295	0.793	1.672	3.316	3.404	2.485	3.005	3.492	1.08	2.06	2.1	-0.34	0.74	1.73	1.77	1.31	1.59	1.8	0.153376	0.0617182	0.0144452	0.105358	0.259687	0.0938358	0.0373106	0.0616434	0.00350443	0.0783352	0.8946
FALSE	High	LSKPAEAMQGAEDNAQNSEEEKPQAHAER	[R].LSKPAEAMQGAEDNAQNSEEEKPQAHAER.[K]	2xTMTpro [K3; K22]; 1xTMTpro [N-Term]; 1xPhospho [S18(100)]	2xTMTpro [K3; K22]; 1xTMTpro [N-Term]; 1xPhospho [S2(0); S18(100)]	3.8061e-07	5.34993e-05	1	1	1	TGGT1_254390-t26_1-p1	TGGT1_254390-t26_1-p1 [587-615]	TGGT1_254390-t26_1-p1 1xPhospho [S588(0); S604(100)]	TGGT1_254390-t26_1-p1 1xPhospho [S604(100)]	transcript=TGGT1_254390-t26_1 | gene=TGGT1_254390 | organism=Toxoplasma_gondii_GT1 | gene_product=CRAL-TRIO domain-containing protein [Source:UniProtKB/TrEMBL;Acc:S7UM21] | transcript_product=CRAL/TRIO domain-containing protein | location=TGGT1_chrIII:1681234-1686817(-) | protein_length=683 | sequence_SO=chromosome | SO=protein_coding_gene | is_pseudo=false	0	4158.04	29
FALSE	High	LSKPVLLSEGEAAPAAATR	[K].LSKPVLLSEGEAAPAAATR.[G]	1xTMTpro [K3]; 1xTMTpro [N-Term]; 1xPhospho [S8(100)]	1xTMTpro [K3]; 1xTMTpro [N-Term]; 1xPhospho [S2(0); S8(100); T18(0)]	2.21109e-06	5.34993e-05	1	1	2	TGGT1_206330-t26_1-p1	TGGT1_206330-t26_1-p1 [921-939]	TGGT1_206330-t26_1-p1 1xPhospho [S922(0); S928(100); T938(0)]	TGGT1_206330-t26_1-p1 1xPhospho [S928(100)]	transcript=TGGT1_206330-t26_1 | gene=TGGT1_206330 | organism=Toxoplasma_gondii_GT1 | gene_product=PHD-finger domain-containing protein [Source:UniProtKB/TrEMBL;Acc:S7UUA0] | transcript_product=PHD-finger domain-containing protein | location=TGGT1_chrVIIa:1032599-1036290(+) | protein_length=1073 | sequence_SO=chromosome | SO=protein_coding_gene | is_pseudo=false	0	2569.42	19	1.065	1.092	0.992	0.654	0.696	0.714	0.649	0.698	0.609	0.587	0.09	0.13	-0.01	-0.61	-0.52	-0.49	-0.62	-0.52	-0.72	-0.77	0.751843	0.592075	0.97862	0.264473	0.0598803	0.129165	0.0895657	0.358595	0.0339681	0.100372	0.962682
FALSE	High	LSLDGATAEPSSGGALRPQSDADMLER	[R].LSLDGATAEPSSGGALRPQSDADMLER.[G]	1xTMTpro [N-Term]; 1xPhospho [S2(100)]	1xTMTpro [N-Term]; 1xPhospho [S2(100); T7(0); S11(0); S12(0); S20(0)]	2.45625e-08	5.34993e-05	1	1	2	TGGT1_289350-t26_1-p1	TGGT1_289350-t26_1-p1 [46-72]	TGGT1_289350-t26_1-p1 1xPhospho [S47(100); T52(0); S56(0); S57(0); S65(0)]	TGGT1_289350-t26_1-p1 1xPhospho [S47(100)]	transcript=TGGT1_289350-t26_1 | gene=TGGT1_289350 | organism=Toxoplasma_gondii_GT1 | gene_product=ABC transporter domain-containing protein [Source:UniProtKB/TrEMBL;Acc:S7VYI6] | transcript_product=ATP-binding cassette G family transporter ABCG84 | location=TGGT1_chrIX:3026173-3037688(+) | protein_length=766 | sequence_SO=chromosome | SO=protein_coding_gene | is_pseudo=false	0	3128.49	27	0.909	0.871	0.808	1.375	1.251	1.198	1.112	1.296	1.243	1.308	-0.14	-0.2	-0.31	0.46	0.32	0.26	0.15	0.37	0.31	0.39	0.340872	0.252694	0.0045784	0.11619	0.00703354	0.364809	0.329647	0.15534	0.552304	0.2275	0.9065
FALSE	High	LSIETHGSGPLTHLNR	[R].LSIETHGSGPLTHLNR.[R]	1xTMTpro [N-Term]; 1xPhospho [S8(100)]	1xTMTpro [N-Term]; 1xPhospho [S2(0); T5(0); S8(100); T12(0)]	1.249e-09	5.34993e-05	1	1	3	TGGT1_208400B-t26_1-p1	TGGT1_208400B-t26_1-p1 [1359-1374]	TGGT1_208400B-t26_1-p1 1xPhospho [S1360(0); T1363(0); S1366(100); T1370(0)]	TGGT1_208400B-t26_1-p1 1xPhospho [S1366(100)]	transcript=TGGT1_208400B-t26_1 | gene=TGGT1_208400B | organism=Toxoplasma_gondii_GT1 | gene_product=hypothetical protein | transcript_product=hypothetical protein | location=TGGT1_chrIb:671628-681222(-) | protein_length=1824 | sequence_SO=chromosome | SO=protein_coding_gene | is_pseudo=false	0	2116.09	16	1.176	1.029	1.438	1.053	1.238	1.083	1.515	1.247	1.081	1.214	0.23	0.04	0.52	0.07	0.31	0.12	0.6	0.32	0.11	0.28	0.45608	0.919486	0.100896	0.81433	0.619079	0.872605	0.322655	0.45688	0.404423	0.0481979	0.917474
FALSE	High	LSIETHGSGPLTHLNR	[R].LSIETHGSGPLTHLNR.[R]	1xTMTpro [N-Term]; 3xPhospho [S2(100); T5(100); S8(100)]	1xTMTpro [N-Term]; 3xPhospho [S2(100); T5(100); S8(100); T12(0)]	5.152e-06	5.34993e-05	1	1	4	TGGT1_208400B-t26_1-p1	TGGT1_208400B-t26_1-p1 [1359-1374]	TGGT1_208400B-t26_1-p1 3xPhospho [S1360(100); T1363(100); S1366(100); T1370(0)]	TGGT1_208400B-t26_1-p1 3xPhospho [S1360(100); T1363(100); S1366(100)]	transcript=TGGT1_208400B-t26_1 | gene=TGGT1_208400B | organism=Toxoplasma_gondii_GT1 | gene_product=hypothetical protein | transcript_product=hypothetical protein | location=TGGT1_chrIb:671628-681222(-) | protein_length=1824 | sequence_SO=chromosome | SO=protein_coding_gene | is_pseudo=false	0	2276.02	16
FALSE	High	LSRDSTEDASETTAGVAR	[K].LSRDSTEDASETTAGVAR.[G]	1xTMTpro [N-Term]; 1xPhospho [S5(99.7)]	1xTMTpro [N-Term]; 1xPhospho [S2(0); S5(99.7); T6(0.4); S10(0); T12(0); T13(0)]	2.19299e-10	5.34993e-05	1	1	3	TGGT1_201150-t26_1-p1	TGGT1_201150-t26_1-p1 [1382-1399]	TGGT1_201150-t26_1-p1 1xPhospho [S1383(0); S1386(99.7); T1387(0.4); S1391(0); T1393(0); T1394(0)]	TGGT1_201150-t26_1-p1 1xPhospho [S1386(99.7)]	transcript=TGGT1_201150-t26_1 | gene=TGGT1_201150 | organism=Toxoplasma_gondii_GT1 | gene_product=Heavy metal translocating P-type ATPase subfamily protein [Source:UniProtKB/TrEMBL;Acc:S7WB84] | transcript_product=heavy metal translocating P-type ATPase subfamily protein | location=TGGT1_chrVIIa:3895489-3905933(+) | protein_length=1965 | sequence_SO=chromosome | SO=protein_coding_gene | is_pseudo…	1	2250.06	18	1.041	0.999	1.177	1.09	1.135	1.089	1.283	0.965	0.957	1.158	0.06	0	0.24	0.12	0.18	0.12	0.36	-0.05	-0.06	0.21	0.804441	0.994883	0.238996	0.606219	0.0285049	0.261768	0.14267	0.426594	0.616793	0.296099	0.973905
FALSE	High	MDDSDDDEWRR	[R].MDDSDDDEWRR.[D]	1xTMTpro [N-Term]; 1xPhospho [S4(100)]	1xTMTpro [N-Term]; 1xPhospho [S4(100)]	1.28322e-06	5.34993e-05	1	1	12	TGGT1_315270-t26_1-p1	TGGT1_315270-t26_1-p1 [62-72]	TGGT1_315270-t26_1-p1 1xPhospho [S65(100)]	TGGT1_315270-t26_1-p1 1xPhospho [S65(100)]	transcript=TGGT1_315270-t26_1 | gene=TGGT1_315270 | organism=Toxoplasma_gondii_GT1 | gene_product=hypothetical protein | transcript_product=hypothetical protein | location=TGGT1_chrXI:4558433-4565813(-) | protein_length=780 | sequence_SO=chromosome | SO=protein_coding_gene | is_pseudo=false	1	1823.72	11	1.051	0.852	0.89	1.072	1.127	0.913	0.954	0.963	0.824	0.994	0.07	-0.23	-0.17	0.1	0.17	-0.13	-0.07	-0.06	-0.28	-0.01	0.614005	0.313639	0.424017	0.841712	0.788254	0.714323	0.839298	0.889073	0.550003	0.971694	0.941803
FALSE	High	LSSASGPSGVSAAER	[R].LSSASGPSGVSAAER.[M]	1xTMTpro [N-Term]; 1xPhospho [S3(99.6)]	1xTMTpro [N-Term]; 1xPhospho [S2(0.4); S3(99.6); S5(0); S8(0); S11(0)]	8.0517e-05	5.34993e-05	1	1	2	TGGT1_209100-t26_1-p1	TGGT1_209100-t26_1-p1 [583-597]	TGGT1_209100-t26_1-p1 1xPhospho [S584(0.4); S585(99.6); S587(0); S590(0); S593(0)]	TGGT1_209100-t26_1-p1 1xPhospho [S585(99.6)]	transcript=TGGT1_209100-t26_1 | gene=TGGT1_209100 | organism=Toxoplasma_gondii_GT1 | gene_product=PUB domain-containing protein [Source:UniProtKB/TrEMBL;Acc:S7VS99] | transcript_product=PUB domain-containing protein | location=TGGT1_chrIb:1054806-1062365(-) | protein_length=620 | sequence_SO=chromosome | SO=protein_coding_gene | is_pseudo=false	0	1759.85	15	1.321	1.261	1.192	0.883	1.167	1.114	1.052	0.972	1.181	1.051	0.4	0.33	0.25	-0.18	0.22	0.16	0.07	-0.04	0.24	0.07	0.36718	0.586445	0.43792	0.584489	0.0768173	0.588679	0.220295	0.736993	0.249429	0.460806	0.90924
FALSE	High	LSSAVAEDQNGMEER	[R].LSSAVAEDQNGMEER.[R]	1xTMTpro [N-Term]; 1xPhospho [S]	1xTMTpro [N-Term]; 1xPhospho [S2(50); S3(50)]	4.46291e-05	5.34993e-05	1	1	1	TGGT1_305540-t26_1-p1	TGGT1_305540-t26_1-p1 [619-633]			transcript=TGGT1_305540-t26_1 | gene=TGGT1_305540 | organism=Toxoplasma_gondii_GT1 | gene_product=hypothetical protein | transcript_product=hypothetical protein | location=TGGT1_chrIX:5235605-5242113(-) | protein_length=824 | sequence_SO=chromosome | SO=protein_coding_gene | is_pseudo=false	0	2019.9	15
FALSE	High	LSTLSSASLSVGELPSLLR	[R].LSTLSSASLSVGELPSLLR.[A]	1xTMTpro [N-Term]; 1xPhospho [S6(99.6)]	1xTMTpro [N-Term]; 1xPhospho [S2(0); T3(0); S5(0.4); S6(99.6); S8(0); S10(0); S16(0)]	4.04363e-06	5.34993e-05	1	1	2	TGGT1_272640-t26_1-p1	TGGT1_272640-t26_1-p1 [101-119]	TGGT1_272640-t26_1-p1 1xPhospho [S102(0); T103(0); S105(0.4); S106(99.6); S108(0); S110(0); S116(0)]	TGGT1_272640-t26_1-p1 1xPhospho [S106(99.6)]	transcript=TGGT1_272640-t26_1 | gene=TGGT1_272640 | organism=Toxoplasma_gondii_GT1 | gene_product=Putative eukaryotic initiation factor-2B, epsilon subunit [Source:UniProtKB/TrEMBL;Acc:S7WC97] | transcript_product=putative eukaryotic initiation factor-2B, epsilon subunit | location=TGGT1_chrVIII:3820760-3827014(+) | protein_length=858 | sequence_SO=chromosome | SO=protein_coding_gene | is_pseudo=…	0	2314.26	19
FALSE	High	LSTSDGPASPSVSDSPR	[R].LSTSDGPASPSVSDSPR.[N]	1xTMTpro [N-Term]; 1xPhospho [S/T]	1xTMTpro [N-Term]; 1xPhospho [S2(0); T3(0); S4(0); S9(0); S11(0); S13(50); S15(50)]	5.10651e-07	5.34993e-05	1	1	3	TGGT1_257470-t26_1-p1	TGGT1_257470-t26_1-p1 [81-97]			transcript=TGGT1_257470-t26_1 | gene=TGGT1_257470 | organism=Toxoplasma_gondii_GT1 | gene_product=Myosin motor domain-containing protein [Source:UniProtKB/TrEMBL;Acc:S7WF44] | transcript_product=myosin J | location=TGGT1_chrVIIb:3962778-3973847(+) | protein_length=2532 | sequence_SO=chromosome | SO=protein_coding_gene | is_pseudo=false	0	2043.96	17
FALSE	High	LSTSPDVIQGHQPR	[R].LSTSPDVIQGHQPR.[D]	1xTMTpro [N-Term]; 1xPhospho [S/T]	1xTMTpro [N-Term]; 1xPhospho [S2(49.9); T3(49.9); S4(0.2)]	1.77101e-05	5.34993e-05	1	1	1	Q9Y385	Q9Y385 [265-278]			Ubiquitin-conjugating enzyme E2 J1 OS=Homo sapiens (Human) OX=9606 GN=UBE2J1 PE=1 SV=2	0	1918.97	14	1.08	0.886	1.085	0.865	0.935	0.767	0.939	0.828	0.936	0.909	0.11	-0.17	0.12	-0.21	-0.1	-0.38	-0.09	-0.27	-0.1	-0.14	0.396375	0.538659	0.384235	0.308485	0.699648	0.429855	0.194328	0.534254	0.78176	0.716092	0.91043
FALSE	High	LSVGVQEKDTPVSETDSLK	[K].LSVGVQEKDTPVSETDSLK.[K]	2xTMTpro [K8; K19]; 1xTMTpro [N-Term]; 1xPhospho [T10(100)]	2xTMTpro [K8; K19]; 1xTMTpro [N-Term]; 1xPhospho [S2(0); T10(100); S13(0); T15(0); S17(0)]	3.72008e-06	5.34993e-05	1	1	1	TGGT1_311750-t26_1-p1	TGGT1_311750-t26_1-p1 [175-193]	TGGT1_311750-t26_1-p1 1xPhospho [S176(0); T184(100); S187(0); T189(0); S191(0)]	TGGT1_311750-t26_1-p1 1xPhospho [T184(100)]	transcript=TGGT1_311750-t26_1 | gene=TGGT1_311750 | organism=Toxoplasma_gondii_GT1 | gene_product=Mago-bind domain-containing protein [Source:UniProtKB/TrEMBL;Acc:A0A125YLG3] | transcript_product=mago binding protein | location=TGGT1_chrXI:2211180-2214199(+) | protein_length=250 | sequence_SO=chromosome | SO=protein_coding_gene | is_pseudo=false	1	3024.63	19
FALSE	High	ISVLTAEHLGR	[R].ISVLTAEHLGR.[G]	1xTMTpro [N-Term]; 1xPhospho [S2(100)]	1xTMTpro [N-Term]; 1xPhospho [S2(100); T5(0)]	2.24421e-07	5.34993e-05	1	1	3	TGGT1_202460-t26_1-p1	TGGT1_202460-t26_1-p1 [104-114]	TGGT1_202460-t26_1-p1 1xPhospho [S105(100); T108(0)]	TGGT1_202460-t26_1-p1 1xPhospho [S105(100)]	transcript=TGGT1_202460-t26_1 | gene=TGGT1_202460 | organism=Toxoplasma_gondii_GT1 | gene_product=Diacylglycerol kinase [Source:UniProtKB/TrEMBL;Acc:S7UUK3] | transcript_product=diacylglycerol kinase accessory domain (presumed) domain-containing protein | location=TGGT1_chrVIIa:3208196-3216030(-) | protein_length=679 | sequence_SO=chromosome | SO=protein_coding_gene | is_pseudo=false	0	1579.85	11
FALSE	High	ISVPESQYPANAK	[K].ISVPESQYPANAK.[S]	1xTMTpro [K13]; 1xTMTpro [N-Term]	1xTMTpro [K13]; 1xTMTpro [N-Term]	7.12882e-07	5.34993e-05	1	1	1	TGGT1_233480-t26_1-p1	TGGT1_233480-t26_1-p1 [149-161]			transcript=TGGT1_233480-t26_1 | gene=TGGT1_233480 | organism=Toxoplasma_gondii_GT1 | gene_product=SAG-related sequence SRS29C [Source:UniProtKB/TrEMBL;Acc:S7WBY8] | transcript_product=SAG-related sequence SRS29C | location=TGGT1_chrVIII:2667297-2668415(+) | protein_length=372 | sequence_SO=chromosome | SO=protein_coding_gene | is_pseudo=false	0	2012.13	13	0.67	0.922	0.77	0.95	0.636	0.876	0.731	0.966	0.95	1.027	-0.58	-0.12	-0.38	-0.07	-0.65	-0.19	-0.45	-0.05	-0.07	0.04	0.0554752	0.385209	0.445978	0.718029	0.195753	0.240355	0.218782	0.77876	0.639303	0.838041	0.8946
FALSE	High	LSVSDFEEEEEGDILR	[R].LSVSDFEEEEEGDILR.[K]	1xTMTpro [N-Term]; 1xPhospho [S4(100)]	1xTMTpro [N-Term]; 1xPhospho [S2(0); S4(100)]	3.23067e-08	5.34993e-05	1	1	3	TGGT1_309250-t26_1-p1	TGGT1_309250-t26_1-p1 [3210-3225]	TGGT1_309250-t26_1-p1 1xPhospho [S3211(0); S3213(100)]	TGGT1_309250-t26_1-p1 1xPhospho [S3213(100)]	transcript=TGGT1_309250-t26_1 | gene=TGGT1_309250 | organism=Toxoplasma_gondii_GT1 | gene_product=hypothetical protein | transcript_product=hypothetical protein | location=TGGT1_chrXI:547054-561278(-) | protein_length=3801 | sequence_SO=chromosome | SO=protein_coding_gene | is_pseudo=false	0	2251.03	16	0.888	0.764	0.745	1.239	1.1	0.947	0.924	1.119	0.946	0.728	-0.17	-0.39	-0.42	0.31	0.14	-0.08	-0.11	0.16	-0.08	-0.46	0.350956	0.179807	0.220639	0.388921	0.743249	0.592172	0.324262	0.420378	0.339835	0.0251558	0.9065
FALSE	High	LSVSSRKSANEEDGEGAQESTAAK	[R].LSVSSRKSANEEDGEGAQESTAAK.[L]	2xTMTpro [K7; K24]; 1xTMTpro [N-Term]; 2xPhospho [S/T]	2xTMTpro [K7; K24]; 1xTMTpro [N-Term]; 2xPhospho [S2(0.6); S4(66.5); S5(66.5); S8(66.5); S20(0); T21(0)]	8.37658e-05	5.34993e-05	1	1	1	TGGT1_220900-t26_1-p1	TGGT1_220900-t26_1-p1 [396-419]			transcript=TGGT1_220900-t26_1 | gene=TGGT1_220900 | organism=Toxoplasma_gondii_GT1 | gene_product=hypothetical protein | transcript_product=hypothetical protein | location=TGGT1_chrII:27409-29529(+) | protein_length=706 | sequence_SO=chromosome | SO=protein_coding_gene | is_pseudo=false	2	3523.71	24	1.082	0.573	0.718	1.108	1.199	0.635	0.796	0.936	0.494	0.837	0.11	-0.8	-0.48	0.15	0.26	-0.65	-0.33	-0.1	-1.02	-0.26	0.770984	0.526494	0.707063	0.898439	0.744814	0.0475044	0.0828628	0.771478	0.0832277	0.0634716	0.968074
FALSE	High	ISVTDSQQSFHSK	[R].ISVTDSQQSFHSK.[-]	1xTMTpro [K13]; 1xTMTpro [N-Term]; 1xPhospho [S9(100)]	1xTMTpro [K13]; 1xTMTpro [N-Term]; 1xPhospho [S2(0); T4(0); S6(0); S9(100); S12(0)]	8.15088e-08	5.34993e-05	1	1	3	TGGT1_235750-t26_1-p1	TGGT1_235750-t26_1-p1 [351-363]	TGGT1_235750-t26_1-p1 1xPhospho [S352(0); T354(0); S356(0); S359(100); S362(0)]	TGGT1_235750-t26_1-p1 1xPhospho [S359(100)]	transcript=TGGT1_235750-t26_1 | gene=TGGT1_235750 | organism=Toxoplasma_gondii_GT1 | gene_product=Protein kinase domain-containing protein [Source:UniProtKB/TrEMBL;Acc:S7UQN9] | transcript_product=ULK kinase | location=TGGT1_chrX:4980554-4985413(+) | protein_length=363 | sequence_SO=chromosome | SO=protein_coding_gene | is_pseudo=false	0	2152.09	13	1.683	2.256	1.999	0.922	1.551	2.08	1.842	1.627	1.499	1.681	0.75	1.17	1	-0.12	0.63	1.06	0.88	0.7	0.58	0.75	0.268572	0.124058	0.0963539	0.0153784	0.313502	0.139077	0.110948	0.0172743	0.0693678	0.06922	0.900211
FALSE	High	ISWGSGSGQQAVTATPSGDK	[K].ISWGSGSGQQAVTATPSGDK.[A]	1xTMTpro [K20]; 1xTMTpro [N-Term]	1xTMTpro [K20]; 1xTMTpro [N-Term]	1.50971e-10	5.34993e-05	1	1	2	TGGT1_228630-t26_1-p1	TGGT1_228630-t26_1-p1 [108-127]			transcript=TGGT1_228630-t26_1 | gene=TGGT1_228630 | organism=Toxoplasma_gondii_GT1 | gene_product=hypothetical protein | transcript_product=hypothetical protein | location=TGGT1_chrX:179956-182506(+) | protein_length=328 | sequence_SO=chromosome | SO=protein_coding_gene | is_pseudo=false	0	2542.34	20
FALSE	High	LSWHAEDVASLGK	[R].LSWHAEDVASLGK.[S]	1xTMTpro [K13]; 1xTMTpro [N-Term]; 1xPhospho [S10(100)]	1xTMTpro [K13]; 1xTMTpro [N-Term]; 1xPhospho [S2(0); S10(100)]	2.73997e-06	5.34993e-05	1	1	2	TGGT1_220090-t26_1-p1	TGGT1_220090-t26_1-p1 [137-149]	TGGT1_220090-t26_1-p1 1xPhospho [S138(0); S146(100)]	TGGT1_220090-t26_1-p1 1xPhospho [S146(100)]	transcript=TGGT1_220090-t26_1 | gene=TGGT1_220090 | organism=Toxoplasma_gondii_GT1 | gene_product=DIX domain-containing protein [Source:UniProtKB/TrEMBL;Acc:S7VPB3] | transcript_product=hypothetical protein | location=TGGT1_chrV:24881-26973(+) | protein_length=262 | sequence_SO=chromosome | SO=protein_coding_gene | is_pseudo=false	0	2101.1	13	1.257	1.217	1.076	0.664	0.834	0.808	0.714	0.804	0.809	1.132	0.33	0.28	0.11	-0.59	-0.26	-0.31	-0.49	-0.31	-0.31	0.18	0.472075	0.507506	0.782001	0.0628735	0.477667	0.411605	0.289018	0.624986	0.402968	0.336804	0.919077
FALSE	High	LSYSNGDEYEGEWVDGK	[K].LSYSNGDEYEGEWVDGK.[M]	1xTMTpro [K17]; 1xTMTpro [N-Term]	1xTMTpro [K17]; 1xTMTpro [N-Term]	4.02674e-10	5.34993e-05	1	1	1	TGGT1_310440-t26_1-p1	TGGT1_310440-t26_1-p1 [91-107]			transcript=TGGT1_310440-t26_1 | gene=TGGT1_310440 | organism=Toxoplasma_gondii_GT1 | gene_product=Membrane occupation and recognition nexus protein MORN1 [Source:UniProtKB/TrEMBL;Acc:A0A125YJY7] | transcript_product=membrane occupation and recognition nexus protein MORN1 | location=TGGT1_chrXI:1306262-1307353(+) | protein_length=363 | sequence_SO=chromosome | SO=protein_coding_gene | is_pseudo=fa…	0	2556.24	17	0.997	0.944	0.866	0.947	0.944	0.894	0.82	0.866	0.805	0.833	0	-0.08	-0.21	-0.08	-0.08	-0.16	-0.29	-0.21	-0.31	-0.26	0.966716	0.576095	0.245596	0.638378	0.75246	0.608483	0.399538	0.50198	0.216737	0.374744	0.994453
FALSE	High	LSSYLQDIPLGFFQSR	[K].LSSYLQDIPLGFFQSR.[A]	1xTMTpro [N-Term]; 1xPhospho [S3(99.8)]	1xTMTpro [N-Term]; 1xPhospho [S2(0.2); S3(99.8); Y4(0); S15(0)]	2.78613e-09	5.34993e-05	1	1	1	TGGT1_258470-t26_1-p1	TGGT1_258470-t26_1-p1 [110-125]	TGGT1_258470-t26_1-p1 1xPhospho [S111(0.2); S112(99.8); Y113(0); S124(0)]	TGGT1_258470-t26_1-p1 1xPhospho [S112(99.8)]	transcript=TGGT1_258470-t26_1 | gene=TGGT1_258470 | organism=Toxoplasma_gondii_GT1 | gene_product=hypothetical protein | transcript_product=hypothetical protein | location=TGGT1_chrVIIb:3369823-3371292(+) | protein_length=284 | sequence_SO=chromosome | SO=protein_coding_gene | is_pseudo=false	0	2255.14	16	2.16	3.651	3.299	0.98	2.116	3.577	3.233	2.921	3.804	2.015	1.11	1.87	1.72	-0.03	1.08	1.84	1.69	1.55	1.93	1.01	0.383657	0.193635	0.153953	0.951636	0.215079	0.0696748	0.0151905	0.142474	0.0203278	0.438116	0.909509
FALSE	High	ITAVGGPHSER	[K].ITAVGGPHSER.[E]	1xTMTpro [N-Term]; 1xPhospho [S9(100)]	1xTMTpro [N-Term]; 1xPhospho [T2(0); S9(100)]	0.000142196	5.34993e-05	1	1	1	TGGT1_286270-t26_1-p1	TGGT1_286270-t26_1-p1 [84-94]	TGGT1_286270-t26_1-p1 1xPhospho [T85(0); S92(100)]	TGGT1_286270-t26_1-p1 1xPhospho [S92(100)]	transcript=TGGT1_286270-t26_1 | gene=TGGT1_286270 | organism=Toxoplasma_gondii_GT1 | gene_product=hypothetical protein | transcript_product=hypothetical protein | location=TGGT1_chrV:1710440-1731076(-) | protein_length=5711 | sequence_SO=chromosome | SO=protein_coding_gene | is_pseudo=false	0	1507.76	11
FALSE	High	LTDGESNGEEDRDPVGGPDFFPDSCSGATPSGR	[R].LTDGESNGEEDRDPVGGPDFFPDSCSGATPSGR.[S]	1xMethylthio [C25]; 1xTMTpro [N-Term]; 1xPhospho [T2(100)]	1xMethylthio [C25]; 1xTMTpro [N-Term]; 1xPhospho [T2(100); S6(0); S24(0); S26(0); T29(0); S31(0)]	1.027e-10	5.34993e-05	1	1	2	TGGT1_232620-t26_1-p1	TGGT1_232620-t26_1-p1 [776-808]	TGGT1_232620-t26_1-p1 1xMethylthio [C800]; 1xPhospho [T777(100); S781(0); S799(0); S801(0); T804(0); S806(0)]	TGGT1_232620-t26_1-p1 1xMethylthio [C800]; 1xPhospho [T777(100)]	transcript=TGGT1_232620-t26_1 | gene=TGGT1_232620 | organism=Toxoplasma_gondii_GT1 | gene_product=TYR_PHOSPHATASE_2 domain-containing protein [Source:UniProtKB/TrEMBL;Acc:S7WBV8] | transcript_product=hypothetical protein | location=TGGT1_chrVIII:2190187-2193269(+) | protein_length=894 | sequence_SO=chromosome | SO=protein_coding_gene | is_pseudo=false	1	3798.59	33	0.838	0.095	1.153	1.022	0.857	0.098	1.178	0.991	0.104	1.15	-0.25	-3.4	0.21	0.03	-0.22	-3.36	0.24	-0.01	-3.27	0.2
FALSE	High	LTDNPPATISPSCTSVR	[R].LTDNPPATISPSCTSVR.[D]	1xMethylthio [C13]; 1xTMTpro [N-Term]; 1xPhospho [S/T]	1xMethylthio [C13]; 1xTMTpro [N-Term]; 1xPhospho [T2(0); T8(0); S10(50); S12(50); T14(0); S15(0)]	1.12767e-08	5.34993e-05	1	1	1	TGGT1_225690-t26_1-p1	TGGT1_225690-t26_1-p1 [1525-1541]	TGGT1_225690-t26_1-p1 1xMethylthio [C1537]	TGGT1_225690-t26_1-p1 1xMethylthio [C1537]	transcript=TGGT1_225690-t26_1 | gene=TGGT1_225690 | organism=Toxoplasma_gondii_GT1 | gene_product=hypothetical protein | transcript_product=hypothetical protein | location=TGGT1_chrX:2025685-2031135(+) | protein_length=1816 | sequence_SO=chromosome | SO=protein_coding_gene | is_pseudo=false	0	2189.03	17	0.991	0.907	0.994	0.969	0.96	0.879	0.963	0.892	0.866	0.846	-0.01	-0.14	-0.01	-0.05	-0.06	-0.19	-0.06	-0.17	-0.21	-0.24	0.937603	0.165333	0.930603	0.150253	0.744744	0.0890377	0.581357	0.423355	0.315572	0.252846	0.992775
FALSE	High	ITDSALTETTPCGHHTPEKQDSPTNR	[K].ITDSALTETTPCGHHTPEKQDSPTNR.[R]	1xMethylthio [C12]; 1xTMTpro [K19]; 1xTMTpro [N-Term]; 2xPhospho [T16(100); S22(99.5)]	1xMethylthio [C12]; 1xTMTpro [K19]; 1xTMTpro [N-Term]; 2xPhospho [T2(0); S4(0); T7(0); T9(0); T10(0); T16(100); S22(99.5); T24(0.5)]	0.00012633	5.34993e-05	1	1	2	TGGT1_203010-t26_1-p1	TGGT1_203010-t26_1-p1 [1027-1052]	TGGT1_203010-t26_1-p1 1xMethylthio [C1038]; 2xPhospho [T1028(0); S1030(0); T1033(0); T1035(0); T1036(0); T1042(100); S1048(99.5); T1050(0.5)]	TGGT1_203010-t26_1-p1 1xMethylthio [C1038]; 2xPhospho [T1042(100); S1048(99.5)]	transcript=TGGT1_203010-t26_1 | gene=TGGT1_203010 | organism=Toxoplasma_gondii_GT1 | gene_product=Protein kinase domain-containing protein [Source:UniProtKB/TrEMBL;Acc:S7W3S7] | transcript_product=aurora kinase | location=TGGT1_chrVIIa:2764034-2772472(-) | protein_length=2812 | sequence_SO=chromosome | SO=protein_coding_gene | is_pseudo=false	1	3650.65	26	1.02	1.269	0.782	1.05	1.071	1.332	0.821	0.925	1.2	0.919	0.03	0.34	-0.36	0.07	0.1	0.41	-0.29	-0.11	0.26	-0.12	0.949311	0.134429	0.195183	0.788897	0.889984	0.375758	0.19631	0.820899	0.452746	0.652484	0.993655
FALSE	High	LTENPWQGNASSDK	[K].LTENPWQGNASSDK.[G]	1xTMTpro [K14]; 1xTMTpro [N-Term]	1xTMTpro [K14]; 1xTMTpro [N-Term]	1.93949e-06	5.34993e-05	1	1	6	TGGT1_233460-t26_1-p1	TGGT1_233460-t26_1-p1 [250-263]			transcript=TGGT1_233460-t26_1 | gene=TGGT1_233460 | organism=Toxoplasma_gondii_GT1 | gene_product=SAG-related sequence SRS29B [Source:UniProtKB/TrEMBL;Acc:A0A125YG48] | transcript_product=SAG-related sequence SRS29B | location=TGGT1_chrVIII:2660455-2661465(+) | protein_length=336 | sequence_SO=chromosome | SO=protein_coding_gene | is_pseudo=false	0	2155.13	14	1.018	1.145	1.027	1.044	1.063	1.195	1.072	1.127	1.21	1.129	0.03	0.2	0.04	0.06	0.09	0.26	0.1	0.17	0.28	0.17	0.830994	0.205497	0.495298	0.745387	0.33061	0.438144	0.681811	0.208321	0.487022	0.684829	0.976273
FALSE	High	LTENPWQGNASSDKGATLTIK	[K].LTENPWQGNASSDKGATLTIK.[K]	2xTMTpro [K14; K21]; 1xTMTpro [N-Term]; 1xPhospho [S/T]	2xTMTpro [K14; K21]; 1xTMTpro [N-Term]; 1xPhospho [T2(0); S11(50); S12(50); T17(0); T19(0)]	1.82152e-09	5.34993e-05	1	1	1	TGGT1_233460-t26_1-p1	TGGT1_233460-t26_1-p1 [250-270]			transcript=TGGT1_233460-t26_1 | gene=TGGT1_233460 | organism=Toxoplasma_gondii_GT1 | gene_product=SAG-related sequence SRS29B [Source:UniProtKB/TrEMBL;Acc:A0A125YG48] | transcript_product=SAG-related sequence SRS29B | location=TGGT1_chrVIII:2660455-2661465(+) | protein_length=336 | sequence_SO=chromosome | SO=protein_coding_gene | is_pseudo=false	1	3223.72	21	0.967	0.917	0.831	0.96	0.929	0.88	0.798	0.877	0.842	0.816	-0.05	-0.13	-0.27	-0.06	-0.11	-0.18	-0.33	-0.19	-0.25	-0.29	0.814309	0.0342123	0.00817261	0.863901	0.510184	0.611853	0.436615	0.192246	0.390233	0.176976	0.975117
FALSE	High	LTEQEEDHELAEEEQELEGDER	[R].LTEQEEDHELAEEEQELEGDER.[A]	1xTMTpro [N-Term]; 1xPhospho [T2(100)]	1xTMTpro [N-Term]; 1xPhospho [T2(100)]	5.42406e-10	5.34993e-05	1	1	2	TGGT1_215080-t26_1-p1	TGGT1_215080-t26_1-p1 [1565-1586]	TGGT1_215080-t26_1-p1 1xPhospho [T1566(100)]	TGGT1_215080-t26_1-p1 1xPhospho [T1566(100)]	transcript=TGGT1_215080-t26_1 | gene=TGGT1_215080 | organism=Toxoplasma_gondii_GT1 | gene_product=hypothetical protein | transcript_product=hypothetical protein | location=TGGT1_chrX:6623715-6638073(-) | protein_length=3279 | sequence_SO=chromosome | SO=protein_coding_gene | is_pseudo=false	0	3041.31	22	0.876	0.567	0.52	0.899	0.787	0.51	0.467	0.917	0.558	0.523	-0.19	-0.82	-0.94	-0.15	-0.34	-0.97	-1.1	-0.13	-0.84	-0.94	0.0446727	0.0971641	0.256444	0.826066	0.650229	0.261975	0.0847752	0.626896	0.238819	0.350551	0.8946
FALSE	High	ITETDLEPSLPLPQSPVHTAGEAK	[R].ITETDLEPSLPLPQSPVHTAGEAK.[L]	1xTMTpro [K24]; 1xTMTpro [N-Term]; 1xPhospho [S15(100)]	1xTMTpro [K24]; 1xTMTpro [N-Term]; 1xPhospho [T2(0); T4(0); S9(0); S15(100); T19(0)]	2.92529e-08	5.34993e-05	1	1	1	TGGT1_311770-t26_1-p1	TGGT1_311770-t26_1-p1 [668-691]	TGGT1_311770-t26_1-p1 1xPhospho [T669(0); T671(0); S676(0); S682(100); T686(0)]	TGGT1_311770-t26_1-p1 1xPhospho [S682(100)]	transcript=TGGT1_311770-t26_1 | gene=TGGT1_311770 | organism=Toxoplasma_gondii_GT1 | gene_product=hypothetical protein | transcript_product=hypothetical protein | location=TGGT1_chrXI:2238415-2244852(+) | protein_length=2076 | sequence_SO=chromosome | SO=protein_coding_gene | is_pseudo=false	0	3218.68	24
FALSE	High	LTFDSSFSPNTGK	[K].LTFDSSFSPNTGK.[K]	1xTMTpro [K13]; 1xTMTpro [N-Term]; 1xPhospho [S/T]	1xTMTpro [K13]; 1xTMTpro [N-Term]; 1xPhospho [T2(0); S5(0.1); S6(49.9); S8(49.9); T11(0)]	0.000201823	5.34993e-05	1	1	1	P21796	P21796 [97-109]			Voltage-dependent anion-selective channel protein 1 OS=Homo sapiens (Human) OX=9606 GN=VDAC1 PE=1 SV=2	0	2089.05	13
FALSE	High	LTFDSSFSPNTGKK	[K].LTFDSSFSPNTGKK.[N]	2xTMTpro [K13; K14]; 1xTMTpro [N-Term]; 1xPhospho [S8(100)]	2xTMTpro [K13; K14]; 1xTMTpro [N-Term]; 1xPhospho [T2(0); S5(0); S6(0); S8(100); T11(0)]	7.89399e-05	5.34993e-05	1	1	1	P21796	P21796 [97-110]	P21796 1xPhospho [T98(0); S101(0); S102(0); S104(100); T107(0)]	P21796 1xPhospho [S104(100)]	Voltage-dependent anion-selective channel protein 1 OS=Homo sapiens (Human) OX=9606 GN=VDAC1 PE=1 SV=2	1	2521.35	14	0.798	0.946	1.013	1.106	0.882	1.047	1.121	1.037	1.162	1.093	-0.33	-0.08	0.02	0.15	-0.18	0.07	0.17	0.05	0.22	0.13	0.552443	0.641197	0.958153	0.586257	0.807165	0.497108	0.351385	0.635143	0.00200332	0.248295	0.933386
FALSE	High	LTFDTTFSPNTGKK	[K].LTFDTTFSPNTGKK.[S]	2xTMTpro [K13; K14]; 1xTMTpro [N-Term]; 1xPhospho [S8(100)]	2xTMTpro [K13; K14]; 1xTMTpro [N-Term]; 1xPhospho [T2(0); T5(0); T6(0); S8(100); T11(0)]	1.2943e-05	5.34993e-05	1	1	1	P45880	P45880 [108-121]	P45880 1xPhospho [T109(0); T112(0); T113(0); S115(100); T118(0)]	P45880 1xPhospho [S115(100)]	Voltage-dependent anion-selective channel protein 2 OS=Homo sapiens (Human) OX=9606 GN=VDAC2 PE=1 SV=2	1	2549.38	14
FALSE	High	LTGEADTLHSHEAGDAVSPPSR	[R].LTGEADTLHSHEAGDAVSPPSR.[G]	1xTMTpro [N-Term]; 1xPhospho [S21(100)]	1xTMTpro [N-Term]; 1xPhospho [T2(0); T7(0); S10(0); S18(0); S21(100)]	7.11359e-09	5.34993e-05	1	1	4	TGGT1_253170-t26_1-p1	TGGT1_253170-t26_1-p1 [2151-2172]	TGGT1_253170-t26_1-p1 1xPhospho [T2152(0); T2157(0); S2160(0); S2168(0); S2171(100)]	TGGT1_253170-t26_1-p1 1xPhospho [S2171(100)]	transcript=TGGT1_253170-t26_1 | gene=TGGT1_253170 | organism=Toxoplasma_gondii_GT1 | gene_product=Peptidase_M14 domain-containing protein [Source:UniProtKB/TrEMBL;Acc:S7VVX7] | transcript_product=putative zinc carboxypeptidase | location=TGGT1_chrIII:782500-798758(+) | protein_length=2203 | sequence_SO=chromosome | SO=protein_coding_gene | is_pseudo=false	0	2631.24	22
FALSE	High	LTGEADTLHSHEAGDAVSPPSR	[R].LTGEADTLHSHEAGDAVSPPSR.[G]	1xTMTpro [N-Term]; 2xPhospho [S18(100); S21(100)]	1xTMTpro [N-Term]; 2xPhospho [T2(0); T7(0); S10(0); S18(100); S21(100)]	3.30746e-12	5.34993e-05	1	1	4	TGGT1_253170-t26_1-p1	TGGT1_253170-t26_1-p1 [2151-2172]	TGGT1_253170-t26_1-p1 2xPhospho [T2152(0); T2157(0); S2160(0); S2168(100); S2171(100)]	TGGT1_253170-t26_1-p1 2xPhospho [S2168(100); S2171(100)]	transcript=TGGT1_253170-t26_1 | gene=TGGT1_253170 | organism=Toxoplasma_gondii_GT1 | gene_product=Peptidase_M14 domain-containing protein [Source:UniProtKB/TrEMBL;Acc:S7VVX7] | transcript_product=putative zinc carboxypeptidase | location=TGGT1_chrIII:782500-798758(+) | protein_length=2203 | sequence_SO=chromosome | SO=protein_coding_gene | is_pseudo=false	0	2711.2	22
FALSE	High	LTCAASSPSSPSNAHAAAASR	[K].LTCAASSPSSPSNAHAAAASR.[L]	1xMethylthio [C3]; 1xTMTpro [N-Term]; 2xPhospho [S10(99.7); S/T]	1xMethylthio [C3]; 1xTMTpro [N-Term]; 2xPhospho [T2(0); S6(33.4); S7(33.4); S9(33.5); S10(99.7); S12(0); S20(0)]	1.5222e-06	5.34993e-05	1	1	3	TGGT1_225890-t26_1-p1	TGGT1_225890-t26_1-p1 [243-263]	TGGT1_225890-t26_1-p1 1xMethylthio [C245]; 2xPhospho [T244(0); S248(33.4); S249(33.4); S251(33.5); S252(99.7); S254(0); S262(0)]	TGGT1_225890-t26_1-p1 1xMethylthio [C245]; 2xPhospho [S252(99.7); S/T]	transcript=TGGT1_225890-t26_1 | gene=TGGT1_225890 | organism=Toxoplasma_gondii_GT1 | gene_product=hypothetical protein | transcript_product=hypothetical protein | location=TGGT1_chrX:1864237-1871724(-) | protein_length=2111 | sequence_SO=chromosome | SO=protein_coding_gene | is_pseudo=false	0	2467.05	21	1.017	1.007	0.969	1.186	1.206	1.194	1.149	1	0.959	1.179	0.02	0.01	-0.05	0.25	0.27	0.26	0.2	0	-0.06	0.24	0.963019	0.979855	0.925656	0.634776	0.104376	0.119099	0.0279205	0.998523	0.58422	0.303164	0.994453
FALSE	High	LSSYFDQDEADEIHR	[R].LSSYFDQDEADEIHR.[R]	1xTMTpro [N-Term]; 1xPhospho [S3(99.7)]	1xTMTpro [N-Term]; 1xPhospho [S2(0.3); S3(99.7); Y4(0)]	3.12366e-06	5.34993e-05	1	1	2	TGGT1_255895-t26_1-p1	TGGT1_255895-t26_1-p1 [477-491]	TGGT1_255895-t26_1-p1 1xPhospho [S478(0.3); S479(99.7); Y480(0)]	TGGT1_255895-t26_1-p1 1xPhospho [S479(99.7)]	transcript=TGGT1_255895-t26_1 | gene=TGGT1_255895 | organism=Toxoplasma_gondii_GT1 | gene_product=hypothetical protein | transcript_product=hypothetical protein | location=TGGT1_chrVIIb:4551962-4554000(-) | protein_length=556 | sequence_SO=chromosome | SO=protein_coding_gene | is_pseudo=false	0	2208.98	15
FALSE	High	LSSVASSGEAGPAGDSIH	[R].LSSVASSGEAGPAGDSIH.[-]	1xTMTpro [N-Term]; 1xPhospho [S]	1xTMTpro [N-Term]; 1xPhospho [S2(50); S3(50); S6(0); S7(0); S16(0)]	0.000138326	5.34993e-05	1	1	6	TGGT1_310802-t26_1-p1	TGGT1_310802-t26_1-p1 [482-499]			transcript=TGGT1_310802-t26_1 | gene=TGGT1_310802 | organism=Toxoplasma_gondii_GT1 | gene_product=CRAL-TRIO domain-containing protein [Source:UniProtKB/TrEMBL;Acc:S7W265] | transcript_product=CRAL/TRIO domain-containing protein | location=TGGT1_chrXI:1562990-1566501(+) | protein_length=499 | sequence_SO=chromosome | SO=protein_coding_gene | is_pseudo=false	0	2025.94	18
FALSE	High	LSSTGSELGGLASR	[R].LSSTGSELGGLASR.[S]	1xTMTpro [N-Term]; 1xPhospho [S6(100)]	1xTMTpro [N-Term]; 1xPhospho [S2(0); S3(0); T4(0); S6(100); S13(0)]	0.000236108	5.34993e-05	1	1	1	TGGT1_261490-t26_1-p1	TGGT1_261490-t26_1-p1 [1425-1438]	TGGT1_261490-t26_1-p1 1xPhospho [S1426(0); S1427(0); T1428(0); S1430(100); S1437(0)]	TGGT1_261490-t26_1-p1 1xPhospho [S1430(100)]	transcript=TGGT1_261490-t26_1 | gene=TGGT1_261490 | organism=Toxoplasma_gondii_GT1 | gene_product=hypothetical protein | transcript_product=hypothetical protein | location=TGGT1_chrVIIb:1674000-1684152(+) | protein_length=2402 | sequence_SO=chromosome | SO=protein_coding_gene | is_pseudo=false	0	1718.86	14
FALSE	High	LSSDFSSESEESEESTANR	[R].LSSDFSSESEESEESTANR.[C]	1xTMTpro [N-Term]; 1xPhospho [S/T]	1xTMTpro [N-Term]; 1xPhospho [S2(0); S3(0); S6(50); S7(50); S9(0); S12(0); S15(0); T16(0)]	2.95474e-05	5.34993e-05	1	1	1	TGGT1_276170-t26_1-p1	TGGT1_276170-t26_1-p1 [896-914]			transcript=TGGT1_276170-t26_1 | gene=TGGT1_276170 | organism=Toxoplasma_gondii_GT1 | gene_product=PI3K/PI4K domain-containing protein [Source:UniProtKB/TrEMBL;Acc:S7VW73] | transcript_product=phosphatidylinositol 3- and 4-kinase | location=TGGT1_chrIII:84006-93774(+) | protein_length=1228 | sequence_SO=chromosome | SO=protein_coding_gene | is_pseudo=false	0	2475.04	19
FALSE	High	LSSDSPGKDVAGPPTSR	[R].LSSDSPGKDVAGPPTSR.[Q]	1xTMTpro [K8]; 1xTMTpro [N-Term]; 1xPhospho [S5(100)]	1xTMTpro [K8]; 1xTMTpro [N-Term]; 1xPhospho [S2(0); S3(0); S5(100); T15(0); S16(0)]	5.3656e-09	5.34993e-05	1	1	3	TGGT1_252320-t26_1-p1	TGGT1_252320-t26_1-p1 [160-176]	TGGT1_252320-t26_1-p1 1xPhospho [S161(0); S162(0); S164(100); T174(0); S175(0)]	TGGT1_252320-t26_1-p1 1xPhospho [S164(100)]	transcript=TGGT1_252320-t26_1 | gene=TGGT1_252320 | organism=Toxoplasma_gondii_GT1 | gene_product=Sas10/Utp3/C1D family protein [Source:UniProtKB/TrEMBL;Acc:S7UNA3] | transcript_product=Sas10/Utp3/C1D family protein | location=TGGT1_chrIII:472372-474773(+) | protein_length=268 | sequence_SO=chromosome | SO=protein_coding_gene | is_pseudo=false	1	2359.22	17	1.069	1.183	0.759	0.896	0.958	1.06	0.68	0.838	0.806	0.884	0.1	0.24	-0.4	-0.16	-0.06	0.08	-0.56	-0.25	-0.31	-0.18	0.609211	0.557966	0.414416	0.717452	0.805283	0.292292	0.0337717	0.428044	0.514953	0.200281	0.94095
FALSE	High	ISSEGDLHPLAFEVPCSSSR	[R].ISSEGDLHPLAFEVPCSSSR.[R]	1xMethylthio [C16]; 1xTMTpro [N-Term]; 1xPhospho [S]	1xMethylthio [C16]; 1xTMTpro [N-Term]; 1xPhospho [S2(50); S3(50); S17(0); S18(0); S19(0)]	2.58191e-05	5.34993e-05	1	1	1	TGGT1_312905-t26_1-p1	TGGT1_312905-t26_1-p1 [228-247]	TGGT1_312905-t26_1-p1 1xMethylthio [C243]	TGGT1_312905-t26_1-p1 1xMethylthio [C243]	transcript=TGGT1_312905-t26_1 | gene=TGGT1_312905 | organism=Toxoplasma_gondii_GT1 | gene_product=CLP1_P domain-containing protein [Source:UniProtKB/TrEMBL;Acc:S7UTM1] | transcript_product=hypothetical protein | location=TGGT1_chrXI:2936206-2949180(+) | protein_length=2440 | sequence_SO=chromosome | SO=protein_coding_gene | is_pseudo=false	0	2561.17	20
FALSE	High	ISSFPYSSSQTTGCVISR	[R].ISSFPYSSSQTTGCVISR.[D]	1xMethylthio [C14]; 1xTMTpro [N-Term]; 1xPhospho [S3(99.7)]	1xMethylthio [C14]; 1xTMTpro [N-Term]; 1xPhospho [S2(0.3); S3(99.7); Y6(0); S7(0); S8(0); S9(0); T11(0); T12(0); S17(0)]	6.58445e-07	5.34993e-05	1	1	1	TGGT1_226470-t26_1-p1	TGGT1_226470-t26_1-p1 [2924-2941]	TGGT1_226470-t26_1-p1 1xMethylthio [C2937]; 1xPhospho [S2925(0.3); S2926(99.7); Y2929(0); S2930(0); S2931(0); S2932(0); T2934(0); T2935(0); S2940(0)]	TGGT1_226470-t26_1-p1 1xMethylthio [C2937]; 1xPhospho [S2926(99.7)]	transcript=TGGT1_226470-t26_1 | gene=TGGT1_226470 | organism=Toxoplasma_gondii_GT1 | gene_product=hypothetical protein | transcript_product=hypothetical protein | location=TGGT1_chrX:1515287-1525417(+) | protein_length=3207 | sequence_SO=chromosome | SO=protein_coding_gene | is_pseudo=false	0	2350.08	18	1.183	0.932	0.914	1.031	1.22	0.961	0.942	1.19	1.14	0.739	0.24	-0.1	-0.13	0.04	0.29	-0.06	-0.09	0.25	0.19	-0.44	0.239468	0.211288	0.79781	0.829605	0.144358	0.821025	0.776516	0.280681	0.524395	0.143324	0.900211
FALSE	High	LSSGKTNSSTIELEHAPSGGANGAGAAAAVGDGNENSAIEAGLR	[R].LSSGKTNSSTIELEHAPSGGANGAGAAAAVGDGNENSAIEAGLR.[K]	1xTMTpro [K5]; 1xTMTpro [N-Term]; 3xPhospho [S8(100); S9(99.3); S/T]	1xTMTpro [K5]; 1xTMTpro [N-Term]; 3xPhospho [S2(0.3); S3(49.8); T6(49.8); S8(100); S9(99.3); T10(0.7); S18(0); S37(0)]	1.30997e-09	5.34993e-05	1	1	1	TGGT1_232830-t26_1-p1	TGGT1_232830-t26_1-p1 [713-756]	TGGT1_232830-t26_1-p1 3xPhospho [S714(0.3); S715(49.8); T718(49.8); S720(100); S721(99.3); T722(0.7); S730(0); S749(0)]	TGGT1_232830-t26_1-p1 3xPhospho [S720(100); S721(99.3); S/T]	transcript=TGGT1_232830-t26_1 | gene=TGGT1_232830 | organism=Toxoplasma_gondii_GT1 | gene_product=V-type proton ATPase subunit a [Source:UniProtKB/TrEMBL;Acc:S7WBT9] | transcript_product=putative vacuolar proton translocating ATPase subunit A | location=TGGT1_chrVIII:2275918-2280585(-) | protein_length=909 | sequence_SO=chromosome | SO=protein_coding_gene | is_pseudo=false	1	4957.29	44
FALSE	High	LSSGSSGTSQTPESIGQNPR	[R].LSSGSSGTSQTPESIGQNPR.[V]	1xTMTpro [N-Term]; 1xPhospho [S/T]	1xTMTpro [N-Term]; 1xPhospho [S2(49.9); S3(49.9); S5(0.3); S6(0); T8(0); S9(0); T11(0); S14(0)]	4.05789e-05	5.34993e-05	1	1	1	TGGT1_269260-t26_1-p1	TGGT1_269260-t26_1-p1 [97-116]			transcript=TGGT1_269260-t26_1 | gene=TGGT1_269260 | organism=Toxoplasma_gondii_GT1 | gene_product=hypothetical protein | transcript_product=hypothetical protein | location=TGGT1_chrVIII:5955672-5958237(-) | protein_length=648 | sequence_SO=chromosome | SO=protein_coding_gene | is_pseudo=false	0	2374.12	20
FALSE	High	LSSHPLTSASPTGSESPR	[K].LSSHPLTSASPTGSESPR.[K]	1xTMTpro [N-Term]; 1xPhospho [S16(99.2)]	1xTMTpro [N-Term]; 1xPhospho [S2(0); S3(0); T7(0); S8(0); S10(0); T12(0.4); S14(0.4); S16(99.2)]	5.06445e-11	5.34993e-05	1	1	5	TGGT1_234270-t26_1-p1	TGGT1_234270-t26_1-p1 [1336-1353]	TGGT1_234270-t26_1-p1 1xPhospho [S1337(0); S1338(0); T1342(0); S1343(0); S1345(0); T1347(0.4); S1349(0.4); S1351(99.2)]	TGGT1_234270-t26_1-p1 1xPhospho [S1351(99.2)]	transcript=TGGT1_234270-t26_1 | gene=TGGT1_234270 | organism=Toxoplasma_gondii_GT1 | gene_product=hypothetical protein | transcript_product=hypothetical protein | location=TGGT1_chrX:4150640-4163518(+) | protein_length=2027 | sequence_SO=chromosome | SO=protein_coding_gene | is_pseudo=false	0	2195.07	18	1.174	1.17	1.276	1.009	1.185	1.18	1.287	1.012	0.779	0.888	0.23	0.23	0.35	0.01	0.24	0.24	0.36	0.02	-0.36	-0.17	0.529382	0.264583	0.213674	0.977264	0.756504	0.517985	0.359525	0.971022	0.322152	0.122248	0.92616
FALSE	High	LSSHPLTSASPTGSESPR	[K].LSSHPLTSASPTGSESPR.[K]	1xTMTpro [N-Term]; 2xPhospho [S10(100); S16(99.6)]	1xTMTpro [N-Term]; 2xPhospho [S2(0); S3(0); T7(0); S8(0); S10(100); T12(0); S14(0.4); S16(99.6)]	1.43528e-09	5.34993e-05	1	1	3	TGGT1_234270-t26_1-p1	TGGT1_234270-t26_1-p1 [1336-1353]	TGGT1_234270-t26_1-p1 2xPhospho [S1337(0); S1338(0); T1342(0); S1343(0); S1345(100); T1347(0); S1349(0.4); S1351(99.6)]	TGGT1_234270-t26_1-p1 2xPhospho [S1345(100); S1351(99.6)]	transcript=TGGT1_234270-t26_1 | gene=TGGT1_234270 | organism=Toxoplasma_gondii_GT1 | gene_product=hypothetical protein | transcript_product=hypothetical protein | location=TGGT1_chrX:4150640-4163518(+) | protein_length=2027 | sequence_SO=chromosome | SO=protein_coding_gene | is_pseudo=false	0	2275.03	18	1.03	0.825	0.718	0.886	0.912	0.731	0.637	0.964	0.615	0.531	0.04	-0.28	-0.48	-0.17	-0.13	-0.45	-0.65	-0.05	-0.7	-0.91	0.874878	0.317493	0.358532	0.60573	0.819977	0.129898	0.0554386	0.89127	0.114488	0.191889	0.9836
FALSE	High	LSSHPLTSASPTGSESPRK	[K].LSSHPLTSASPTGSESPRK.[E]	1xTMTpro [K19]; 1xTMTpro [N-Term]; 1xPhospho [T/S]	1xTMTpro [K19]; 1xTMTpro [N-Term]; 1xPhospho [S2(0); S3(0); T7(0); S8(0); S10(0.2); T12(49.8); S14(49.8); S16(0.2)]	0.000344808	5.34993e-05	1	1	1	TGGT1_234270-t26_1-p1	TGGT1_234270-t26_1-p1 [1336-1354]			transcript=TGGT1_234270-t26_1 | gene=TGGT1_234270 | organism=Toxoplasma_gondii_GT1 | gene_product=hypothetical protein | transcript_product=hypothetical protein | location=TGGT1_chrX:4150640-4163518(+) | protein_length=2027 | sequence_SO=chromosome | SO=protein_coding_gene | is_pseudo=false	1	2627.37	19
FALSE	High	LSSLETGRPHPQWQLPGAPMGGSSSGPK	[R].LSSLETGRPHPQWQLPGAPMGGSSSGPK.[V]	1xTMTpro [K28]; 1xTMTpro [N-Term]; 1xPhospho [S/T]	1xTMTpro [K28]; 1xTMTpro [N-Term]; 1xPhospho [S2(33.3); S3(33.3); T6(33.3); S23(0); S24(0); S25(0)]	3.22131e-07	5.34993e-05	1	1	1	TGGT1_206580-t26_1-p1	TGGT1_206580-t26_1-p1 [572-599]			transcript=TGGT1_206580-t26_1 | gene=TGGT1_206580 | organism=Toxoplasma_gondii_GT1 | gene_product=FH2 domain-containing protein [Source:UniProtKB/TrEMBL;Acc:S7W9L4] | transcript_product=formin FRM2 | location=TGGT1_chrVIIa:788142-805346(+) | protein_length=4709 | sequence_SO=chromosome | SO=protein_coding_gene | is_pseudo=false	0	3547.8	28
FALSE	High	LSSLHAAETTNNTAPASPLEADMR	[R].LSSLHAAETTNNTAPASPLEADMR.[D]	1xTMTpro [N-Term]; 1xPhospho [S/T]	1xTMTpro [N-Term]; 1xPhospho [S2(50); S3(50); T9(0); T10(0); T13(0); S17(0)]	2.3661e-05	5.34993e-05	1	1	1	TGGT1_261230-t26_1-p1	TGGT1_261230-t26_1-p1 [668-691]			transcript=TGGT1_261230-t26_1 | gene=TGGT1_261230 | organism=Toxoplasma_gondii_GT1 | gene_product=ANK_REP_REGION domain-containing protein [Source:UniProtKB/TrEMBL;Acc:S7UYH5] | transcript_product=ankyrin repeat-containing protein | location=TGGT1_chrVIIb:1786572-1792641(-) | protein_length=1382 | sequence_SO=chromosome | SO=protein_coding_gene | is_pseudo=false	0	2881.37	24
FALSE	High	LSSLHAAETTNNTAPASPLEADMR	[R].LSSLHAAETTNNTAPASPLEADMR.[D]	1xTMTpro [N-Term]; 3xPhospho [T13(100); S17(100); S/T]	1xTMTpro [N-Term]; 3xPhospho [S2(50); S3(50); T9(0); T10(0); T13(100); S17(100)]	9.75322e-11	5.34993e-05	1	1	2	TGGT1_261230-t26_1-p1	TGGT1_261230-t26_1-p1 [668-691]	TGGT1_261230-t26_1-p1 3xPhospho [S669(50); S670(50); T676(0); T677(0); T680(100); S684(100)]	TGGT1_261230-t26_1-p1 3xPhospho [T680(100); S684(100); S/T]	transcript=TGGT1_261230-t26_1 | gene=TGGT1_261230 | organism=Toxoplasma_gondii_GT1 | gene_product=ANK_REP_REGION domain-containing protein [Source:UniProtKB/TrEMBL;Acc:S7UYH5] | transcript_product=ankyrin repeat-containing protein | location=TGGT1_chrVIIb:1786572-1792641(-) | protein_length=1382 | sequence_SO=chromosome | SO=protein_coding_gene | is_pseudo=false	0	3041.3	24
FALSE	High	LSSLPAYPEAR	[R].LSSLPAYPEAR.[L]	1xTMTpro [N-Term]; 1xPhospho [S2(99.6)]	1xTMTpro [N-Term]; 1xPhospho [S2(99.6); S3(0.4); Y7(0)]	0.000279364	5.34993e-05	1	1	1	TGGT1_237210-t26_1-p1	TGGT1_237210-t26_1-p1 [295-305]	TGGT1_237210-t26_1-p1 1xPhospho [S296(99.6); S297(0.4); Y301(0)]	TGGT1_237210-t26_1-p1 1xPhospho [S296(99.6)]	transcript=TGGT1_237210-t26_1 | gene=TGGT1_237210 | organism=Toxoplasma_gondii_GT1 | gene_product=Protein kinase domain-containing protein [Source:UniProtKB/TrEMBL;Acc:S7VYZ3] | transcript_product=Tyrosine kinase-like (TKL) protein | location=TGGT1_chrX:5671514-5675816(+) | protein_length=935 | sequence_SO=chromosome | SO=protein_coding_gene | is_pseudo=false	0	1587.81	11
FALSE	High	LSSLSPSSLSPR	[R].LSSLSPSSLSPR.[S]	1xTMTpro [N-Term]; 1xPhospho [S10(100)]	1xTMTpro [N-Term]; 1xPhospho [S2(0); S3(0); S5(0); S7(0); S8(0); S10(100)]	1.23899e-05	5.34993e-05	1	1	1	TGGT1_255440-t26_1-p1	TGGT1_255440-t26_1-p1 [277-288]	TGGT1_255440-t26_1-p1 1xPhospho [S278(0); S279(0); S281(0); S283(0); S284(0); S286(100)]	TGGT1_255440-t26_1-p1 1xPhospho [S286(100)]	transcript=TGGT1_255440-t26_1 | gene=TGGT1_255440 | organism=Toxoplasma_gondii_GT1 | gene_product=hypothetical protein | transcript_product=hypothetical protein | location=TGGT1_chrVIIb:4732506-4734913(+) | protein_length=571 | sequence_SO=chromosome | SO=protein_coding_gene | is_pseudo=false	0	1614.84	12
FALSE	High	LSSLVASSPSASPK	[R].LSSLVASSPSASPK.[C]	1xTMTpro [K14]; 1xTMTpro [N-Term]; 1xPhospho [S8(99.7)]	1xTMTpro [K14]; 1xTMTpro [N-Term]; 1xPhospho [S2(0); S3(0); S7(0.3); S8(99.7); S10(0); S12(0)]	0.000234265	5.34993e-05	1	1	1	TGGT1_256920-t26_1-p1	TGGT1_256920-t26_1-p1 [761-774]	TGGT1_256920-t26_1-p1 1xPhospho [S762(0); S763(0); S767(0.3); S768(99.7); S770(0); S772(0)]	TGGT1_256920-t26_1-p1 1xPhospho [S768(99.7)]	transcript=TGGT1_256920-t26_1 | gene=TGGT1_256920 | organism=Toxoplasma_gondii_GT1 | gene_product=PIPK domain-containing protein [Source:UniProtKB/TrEMBL;Acc:S7UZE5] | transcript_product=phosphatidylinositol-4-phosphate 5-Kinase | location=TGGT1_chrVIIb:4268265-4283459(+) | protein_length=4154 | sequence_SO=chromosome | SO=protein_coding_gene | is_pseudo=false	0	2019.1	14	1.262	0.812	1.25	0.669	0.845	0.544	0.837	0.72	0.947	0.56	0.34	-0.3	0.32	-0.58	-0.24	-0.88	-0.26	-0.47	-0.08	-0.84	0.578865	0.409049	0.583814	0.354551	0.181947	0.373891	0.143421	0.301309	0.813428	0.0645407	0.935041
FALSE	High	LSSPALDPLYVHSK	[R].LSSPALDPLYVHSK.[D]	1xTMTpro [K14]; 1xTMTpro [N-Term]; 1xPhospho [S/Y]	1xTMTpro [K14]; 1xTMTpro [N-Term]; 1xPhospho [S2(50); S3(50); Y10(0); S13(0)]	1.07946e-08	5.34993e-05	1	1	1	TGGT1_259870-t26_1-p1	TGGT1_259870-t26_1-p1 [1177-1190]			transcript=TGGT1_259870-t26_1 | gene=TGGT1_259870 | organism=Toxoplasma_gondii_GT1 | gene_product=SAC domain-containing protein [Source:UniProtKB/TrEMBL;Acc:S7W756] | transcript_product=hypothetical protein | location=TGGT1_chrVIIb:2616425-2623588(+) | protein_length=2122 | sequence_SO=chromosome | SO=protein_coding_gene | is_pseudo=false	0	2215.2	14	0.919	0.963	0.709	0.808	0.743	0.778	0.573	0.824	0.678	0.577	-0.12	-0.06	-0.5	-0.31	-0.43	-0.36	-0.8	-0.28	-0.56	-0.79	0.376151	0.883554	0.475964	0.469344	0.274308	0.0338658	0.141899	0.525795	0.1774	0.198059	0.909509
FALSE	High	ISSPHEPEATATDEEPSNSTFSTSK	[R].ISSPHEPEATATDEEPSNSTFSTSK.[D]	1xTMTpro [K25]; 1xTMTpro [N-Term]; 1xPhospho [T10(99.7)]	1xTMTpro [K25]; 1xTMTpro [N-Term]; 1xPhospho [S2(0); S3(0); T10(99.7); T12(0.3); S17(0); S19(0); T20(0); S22(0); T23(0); S24(0)]	3.98334e-09	5.34993e-05	1	1	6	TGGT1_293170-t26_1-p1	TGGT1_293170-t26_1-p1 [809-833]	TGGT1_293170-t26_1-p1 1xPhospho [S810(0); S811(0); T818(99.7); T820(0.3); S825(0); S827(0); T828(0); S830(0); T831(0); S832(0)]	TGGT1_293170-t26_1-p1 1xPhospho [T818(99.7)]	transcript=TGGT1_293170-t26_1 | gene=TGGT1_293170 | organism=Toxoplasma_gondii_GT1 | gene_product=hypothetical protein | transcript_product=hypothetical protein | location=TGGT1_chrIa:111048-121227(-) | protein_length=3263 | sequence_SO=chromosome | SO=protein_coding_gene | is_pseudo=false	0	3337.56	25
FALSE	High	ISSPHEPEATATDEEPSNSTFSTSK	[R].ISSPHEPEATATDEEPSNSTFSTSK.[D]	1xTMTpro [K25]; 1xTMTpro [N-Term]; 2xPhospho [S/T]	1xTMTpro [K25]; 1xTMTpro [N-Term]; 2xPhospho [S2(50); S3(50); T10(50); T12(50); S17(0); S19(0); T20(0); S22(0); T23(0); S24(0)]	0.000387402	5.34993e-05	1	1	3	TGGT1_293170-t26_1-p1	TGGT1_293170-t26_1-p1 [809-833]			transcript=TGGT1_293170-t26_1 | gene=TGGT1_293170 | organism=Toxoplasma_gondii_GT1 | gene_product=hypothetical protein | transcript_product=hypothetical protein | location=TGGT1_chrIa:111048-121227(-) | protein_length=3263 | sequence_SO=chromosome | SO=protein_coding_gene | is_pseudo=false	0	3417.53	25
FALSE	High	ISSPSHFAPAESGSEVK	[R].ISSPSHFAPAESGSEVK.[S]	1xTMTpro [K17]; 1xTMTpro [N-Term]; 1xPhospho [S]	1xTMTpro [K17]; 1xTMTpro [N-Term]; 1xPhospho [S2(49.9); S3(49.9); S5(0.2); S12(0); S14(0)]	3.14833e-05	5.34993e-05	1	1	1	TGGT1_268780-t26_1-p1	TGGT1_268780-t26_1-p1 [3709-3725]			transcript=TGGT1_268780-t26_1 | gene=TGGT1_268780 | organism=Toxoplasma_gondii_GT1 | gene_product=hypothetical protein | transcript_product=hypothetical protein | location=TGGT1_chrVIII:6292251-6316928(-) | protein_length=7354 | sequence_SO=chromosome | SO=protein_coding_gene | is_pseudo=false	0	2418.22	17	1.001	0.997	1.068	0.873	0.874	0.87	0.932	0.875	0.746	0.711	0	0	0.09	-0.2	-0.19	-0.2	-0.1	-0.19	-0.42	-0.49	0.997178	0.946106	0.294075	0.641675	0.125203	0.586961	0.823268	0.716324	0.141249	0.298583	0.998889
FALSE	High	ISSQAGQSEK	[R].ISSQAGQSEK.[V]	1xTMTpro [K10]; 1xTMTpro [N-Term]	1xTMTpro [K10]; 1xTMTpro [N-Term]	2.4231e-05	5.34993e-05	1	1	2	TGGT1_297070-t26_1-p1	TGGT1_297070-t26_1-p1 [351-360]			transcript=TGGT1_297070-t26_1 | gene=TGGT1_297070 | organism=Toxoplasma_gondii_GT1 | gene_product=Alpha-carbonic anhydrase domain-containing protein [Source:UniProtKB/TrEMBL;Acc:A0A125YMC5] | transcript_product=hypothetical protein | location=TGGT1_chrII:1492810-1494671(-) | protein_length=519 | sequence_SO=chromosome | SO=protein_coding_gene | is_pseudo=false	0	1642.93	10	1.147	1.459	1.396	0.965	1.106	1.408	1.347	1.248	1.696	1.703	0.2	0.55	0.48	-0.05	0.15	0.49	0.43	0.32	0.76	0.77	0.681522	0.0797382	0.134406	0.929	0.393704	0.430666	0.445413	0.391797	0.0176882	0.0969295	0.952274
FALSE	High	LSSSDPTSSSAPTEDPPPGHQAEFAAR	[R].LSSSDPTSSSAPTEDPPPGHQAEFAAR.[A]	1xTMTpro [N-Term]; 1xPhospho [S/T]	1xTMTpro [N-Term]; 1xPhospho [S2(33.3); S3(33.3); S4(33.3); T7(0); S8(0); S9(0); S10(0); T13(0)]	0.000211557	5.34993e-05	1	1	2	TGGT1_274130-t26_1-p1	TGGT1_274130-t26_1-p1 [229-255]			transcript=TGGT1_274130-t26_1 | gene=TGGT1_274130 | organism=Toxoplasma_gondii_GT1 | gene_product=Rab-GAP TBC domain-containing protein [Source:UniProtKB/TrEMBL;Acc:S7WCL1] | transcript_product=TBC domain-containing protein | location=TGGT1_chrVIII:2992253-3004561(+) | protein_length=2118 | sequence_SO=chromosome | SO=protein_coding_gene | is_pseudo=false	0	3123.42	27
FALSE	High	LSSSDSVSVSSSQSGRPTTGGDSR	[R].LSSSDSVSVSSSQSGRPTTGGDSR.[T]	1xTMTpro [N-Term]	1xTMTpro [N-Term]	3.9312e-05	5.34993e-05	1	1	1	TGGT1_206610-t26_1-p1	TGGT1_206610-t26_1-p1 [463-486]			transcript=TGGT1_206610-t26_1 | gene=TGGT1_206610 | organism=Toxoplasma_gondii_GT1 | gene_product=Dihydrolipoamide acetyltransferase component of pyruvate dehydrogenase complex [Source:UniProtKB/TrEMBL;Acc:S7UTU2] | transcript_product=pyruvate dehydrogenase complex subunit PDH-E2 | location=TGGT1_chrVIIa:755999-763930(-) | protein_length=929 | sequence_SO=chromosome | SO=protein_coding_gene | is_…	0	2645.29	24
FALSE	High	LSSSLPSSETAPGLGVDER	[R].LSSSLPSSETAPGLGVDER.[Q]	1xTMTpro [N-Term]; 1xPhospho [S4(99.5)]	1xTMTpro [N-Term]; 1xPhospho [S2(0); S3(0.5); S4(99.5); S7(0); S8(0); T10(0)]	6.27799e-07	5.34993e-05	1	1	1	TGGT1_292055-t26_1-p1	TGGT1_292055-t26_1-p1 [415-433]	TGGT1_292055-t26_1-p1 1xPhospho [S416(0); S417(0.5); S418(99.5); S421(0); S422(0); T424(0)]	TGGT1_292055-t26_1-p1 1xPhospho [S418(99.5)]	transcript=TGGT1_292055-t26_1 | gene=TGGT1_292055 | organism=Toxoplasma_gondii_GT1 | gene_product=Calcium dependent protein kinase CDPK8 [Source:UniProtKB/TrEMBL;Acc:S7W446] | transcript_product=calcium dependent protein kinase CDPK8 | location=TGGT1_chrIX:4332594-4340938(-) | protein_length=1498 | sequence_SO=chromosome | SO=protein_coding_gene | is_pseudo=false	0	2286.12	19	0.767	0.843	0.674	1.156	0.886	0.975	0.779	1.081	0.923	0.968	-0.38	-0.25	-0.57	0.21	-0.17	-0.04	-0.36	0.11	-0.12	-0.05	0.43041	0.0389027	0.108914	0.692131	0.304987	0.938945	0.442455	0.456883	0.448524	0.834741	0.911502
FALSE	High	LSSSRPYTGPEETSR	[R].LSSSRPYTGPEETSR.[E]	1xTMTpro [N-Term]; 1xPhospho [S2(100)]	1xTMTpro [N-Term]; 1xPhospho [S2(100); S3(0); S4(0); Y7(0); T8(0); T13(0); S14(0)]	8.03754e-06	5.34993e-05	1	1	17	TGGT1_247450-t26_1-p1	TGGT1_247450-t26_1-p1 [871-885]	TGGT1_247450-t26_1-p1 1xPhospho [S872(100); S873(0); S874(0); Y877(0); T878(0); T883(0); S884(0)]	TGGT1_247450-t26_1-p1 1xPhospho [S872(100)]	transcript=TGGT1_247450-t26_1 | gene=TGGT1_247450 | organism=Toxoplasma_gondii_GT1 | gene_product=hypothetical protein | transcript_product=hypothetical protein | location=TGGT1_chrXII:3275746-3284022(+) | protein_length=2303 | sequence_SO=chromosome | SO=protein_coding_gene | is_pseudo=false	0	2050.98	15	0.945	1.007	0.861	0.946	0.894	0.953	0.814	0.891	0.847	0.817	-0.08	0.01	-0.22	-0.08	-0.16	-0.07	-0.3	-0.17	-0.24	-0.29	0.0766653	0.873922	0.225013	0.500298	0.322189	0.67956	0.314612	0.451561	0.260135	0.252292	0.8946
FALSE	High	LSSSRPYTGPEETSR	[R].LSSSRPYTGPEETSR.[E]	1xTMTpro [N-Term]; 2xPhospho [S2(100); S4(99.5)]	1xTMTpro [N-Term]; 2xPhospho [S2(100); S3(0.5); S4(99.5); Y7(0); T8(0); T13(0); S14(0)]	7.10665e-06	5.34993e-05	1	1	12	TGGT1_247450-t26_1-p1	TGGT1_247450-t26_1-p1 [871-885]	TGGT1_247450-t26_1-p1 2xPhospho [S872(100); S873(0.5); S874(99.5); Y877(0); T878(0); T883(0); S884(0)]	TGGT1_247450-t26_1-p1 2xPhospho [S872(100); S874(99.5)]	transcript=TGGT1_247450-t26_1 | gene=TGGT1_247450 | organism=Toxoplasma_gondii_GT1 | gene_product=hypothetical protein | transcript_product=hypothetical protein | location=TGGT1_chrXII:3275746-3284022(+) | protein_length=2303 | sequence_SO=chromosome | SO=protein_coding_gene | is_pseudo=false	0	2130.94	15	0.971	0.978	0.711	1.157	1.124	1.132	0.823	1.034	1.029	0.74	-0.04	-0.03	-0.49	0.21	0.17	0.18	-0.28	0.05	0.04	-0.43	0.381965	0.508757	0.312341	0.500821	0.609648	0.597606	0.114643	0.885125	0.84893	0.13919	0.909509
FALSE	High	LSSSSSSSSFSSSSSSSSASGVK	[K].LSSSSSSSSFSSSSSSSSASGVK.[K]	1xTMTpro [K23]; 1xTMTpro [N-Term]	1xTMTpro [K23]; 1xTMTpro [N-Term]	1.05902e-11	5.34993e-05	1	1	3	TGGT1_267090-t26_1-p1	TGGT1_267090-t26_1-p1 [472-494]			transcript=TGGT1_267090-t26_1 | gene=TGGT1_267090 | organism=Toxoplasma_gondii_GT1 | gene_product=hypothetical protein | transcript_product=hypothetical protein | location=TGGT1_chrIX:621056-622747(+) | protein_length=563 | sequence_SO=chromosome | SO=protein_coding_gene | is_pseudo=false	0	2722.35	23
FALSE	High	LSSSTDEQHPLAVQAPLQCR	[R].LSSSTDEQHPLAVQAPLQCR.[D]	1xMethylthio [C19]; 1xTMTpro [N-Term]; 1xPhospho [S/T]	1xMethylthio [C19]; 1xTMTpro [N-Term]; 1xPhospho [S2(0.2); S3(33.3); S4(33.3); T5(33.3)]	5.00077e-08	5.34993e-05	1	1	1	TGGT1_228340-t26_1-p1	TGGT1_228340-t26_1-p1 [225-244]	TGGT1_228340-t26_1-p1 1xMethylthio [C243]	TGGT1_228340-t26_1-p1 1xMethylthio [C243]	transcript=TGGT1_228340-t26_1 | gene=TGGT1_228340 | organism=Toxoplasma_gondii_GT1 | gene_product=hypothetical protein | transcript_product=hypothetical protein | location=TGGT1_chrX:307953-313937(+) | protein_length=1782 | sequence_SO=chromosome | SO=protein_coding_gene | is_pseudo=false	0	2610.24	20	1.445	1.309	1.305	0.545	0.788	0.713	0.711	0.705	0.877	0.786	0.53	0.39	0.38	-0.88	-0.34	-0.49	-0.49	-0.51	-0.19	-0.35	0.00560233	0.106505	0.242265	0.198725	0.442653	0.266776	0.163304	0.11036	0.655217	0.195225	0.8946
FALSE	High	LSSATLASPLSK	[R].LSSATLASPLSK.[N]	1xTMTpro [K12]; 1xTMTpro [N-Term]; 1xPhospho [S8(100)]	1xTMTpro [K12]; 1xTMTpro [N-Term]; 1xPhospho [S2(0); S3(0); T5(0); S8(100); S11(0)]	2.60248e-05	5.34993e-05	1	1	1	TGGT1_226050-t26_1-p1	TGGT1_226050-t26_1-p1 [312-323]	TGGT1_226050-t26_1-p1 1xPhospho [S313(0); S314(0); T316(0); S319(100); S322(0)]	TGGT1_226050-t26_1-p1 1xPhospho [S319(100)]	transcript=TGGT1_226050-t26_1 | gene=TGGT1_226050 | organism=Toxoplasma_gondii_GT1 | gene_product=RBR-type E3 ubiquitin transferase [Source:UniProtKB/TrEMBL;Acc:S7UWI8] | transcript_product=hypothetical protein | location=TGGT1_chrX:1753736-1757511(-) | protein_length=774 | sequence_SO=chromosome | SO=protein_coding_gene | is_pseudo=false	0	1863.05	12
FALSE	High	LSESREEGESAETGAR	[R].LSESREEGESAETGAR.[T]	1xTMTpro [N-Term]; 1xPhospho [S4(100)]	1xTMTpro [N-Term]; 1xPhospho [S2(0); S4(100); S10(0); T13(0)]	1.05288e-05	5.34993e-05	1	1	3	TGGT1_237280-t26_1-p1	TGGT1_237280-t26_1-p1 [1457-1472]	TGGT1_237280-t26_1-p1 1xPhospho [S1458(0); S1460(100); S1466(0); T1469(0)]	TGGT1_237280-t26_1-p1 1xPhospho [S1460(100)]	transcript=TGGT1_237280-t26_1 | gene=TGGT1_237280 | organism=Toxoplasma_gondii_GT1 | gene_product=Rab-GAP TBC domain-containing protein [Source:UniProtKB/TrEMBL;Acc:S7UQ40] | transcript_product=TLD protein | location=TGGT1_chrX:5711509-5719913(+) | protein_length=2190 | sequence_SO=chromosome | SO=protein_coding_gene | is_pseudo=false	1	2091.95	16	0.988	0.979	0.967	1.128	1.115	1.104	1.092	0.993	0.999	1.051	-0.02	-0.03	-0.05	0.17	0.16	0.14	0.13	-0.01	0	0.07	0.414162	0.60311	0.831652	0.140392	0.206189	0.331286	0.526342	0.837518	0.99365	0.755842	0.910823
FALSE	High	MDDSDDDEWRR	[R].MDDSDDDEWRR.[D]	1xOxidation [M1]; 1xTMTpro [N-Term]; 1xPhospho [S4(100)]	1xOxidation [M1]; 1xTMTpro [N-Term]; 1xPhospho [S4(100)]	0.000265525	5.34993e-05	1	1	25	TGGT1_315270-t26_1-p1	TGGT1_315270-t26_1-p1 [62-72]	TGGT1_315270-t26_1-p1 1xPhospho [S65(100)]	TGGT1_315270-t26_1-p1 1xPhospho [S65(100)]	transcript=TGGT1_315270-t26_1 | gene=TGGT1_315270 | organism=Toxoplasma_gondii_GT1 | gene_product=hypothetical protein | transcript_product=hypothetical protein | location=TGGT1_chrXI:4558433-4565813(-) | protein_length=780 | sequence_SO=chromosome | SO=protein_coding_gene | is_pseudo=false	1	1839.72	11	1.055	0.905	0.941	0.995	1.05	0.9	0.936	0.915	0.835	0.977	0.08	-0.14	-0.09	-0.01	0.07	-0.15	-0.1	-0.13	-0.26	-0.03	0.702986	0.0758225	0.417986	0.986323	0.911324	0.747757	0.789767	0.668559	0.504404	0.873132	0.957128
FALSE	High	MDGEDHEDCQDSPAAVLGPR	[K].MDGEDHEDCQDSPAAVLGPR.[E]	1xMethylthio [C9]; 1xTMTpro [N-Term]; 1xPhospho [S12(100)]	1xMethylthio [C9]; 1xTMTpro [N-Term]; 1xPhospho [S12(100)]	2.30067e-06	5.34993e-05	1	1	2	TGGT1_216030A-t26_1-p1	TGGT1_216030A-t26_1-p1 [643-662]	TGGT1_216030A-t26_1-p1 1xMethylthio [C651]; 1xPhospho [S654(100)]	TGGT1_216030A-t26_1-p1 1xMethylthio [C651]; 1xPhospho [S654(100)]	transcript=TGGT1_216030A-t26_1 | gene=TGGT1_216030A | organism=Toxoplasma_gondii_GT1 | gene_product=VHS domain-containing protein [Source:UniProtKB/TrEMBL;Acc:S7VUC1] | transcript_product=hypothetical protein | location=TGGT1_chrXI:6370763-6377548(-) | protein_length=1127 | sequence_SO=chromosome | SO=protein_coding_gene | is_pseudo=false	0	2572.05	20
FALSE	High	MVQPDSAPNTNASPLSPLHSPGPR	[K].MVQPDSAPNTNASPLSPLHSPGPR.[H]	1xTMTpro [N-Term]; 1xPhospho [S16(100)]	1xTMTpro [N-Term]; 1xPhospho [S6(0); T10(0); S13(0); S16(100); S20(0)]	4.63228e-09	5.34993e-05	1	1	1	TGGT1_224650-t26_1-p1	TGGT1_224650-t26_1-p1 [129-152]	TGGT1_224650-t26_1-p1 1xPhospho [S134(0); T138(0); S141(0); S144(100); S148(0)]	TGGT1_224650-t26_1-p1 1xPhospho [S144(100)]	transcript=TGGT1_224650-t26_1 | gene=TGGT1_224650 | organism=Toxoplasma_gondii_GT1 | gene_product=mRNA_triPase domain-containing protein [Source:UniProtKB/TrEMBL;Acc:S7UWK3] | transcript_product=mRNA capping enzyme, beta chain protein | location=TGGT1_chrX:2815581-2819580(-) | protein_length=920 | sequence_SO=chromosome | SO=protein_coding_gene | is_pseudo=false	0	2854.39	24
FALSE	High	MVSEAPGVPSSPSTEVR	[K].MVSEAPGVPSSPSTEVR.[T]	1xTMTpro [N-Term]; 1xPhospho [S11(100)]	1xTMTpro [N-Term]; 1xPhospho [S3(0); S10(0); S11(100); S13(0); T14(0)]	4.54945e-11	5.34993e-05	1	1	2	TGGT1_275650-t26_1-p1	TGGT1_275650-t26_1-p1 [16-32]	TGGT1_275650-t26_1-p1 1xPhospho [S18(0); S25(0); S26(100); S28(0); T29(0)]	TGGT1_275650-t26_1-p1 1xPhospho [S26(100)]	transcript=TGGT1_275650-t26_1 | gene=TGGT1_275650 | organism=Toxoplasma_gondii_GT1 | gene_product=hypothetical protein | transcript_product=hypothetical protein | location=TGGT1_chrIII:288290-290923(+) | protein_length=877 | sequence_SO=chromosome | SO=protein_coding_gene | is_pseudo=false	0	2114.02	17	1.061	1.018	0.881	0.897	0.951	0.913	0.79	0.985	0.928	0.813	0.09	0.03	-0.18	-0.16	-0.07	-0.13	-0.34	-0.02	-0.11	-0.3	0.223592	0.119958	0.225067	0.282063	0.620006	0.310105	0.0132524	0.851018	0.395646	0.0318062	0.900211
FALSE	High	MVSEAPGVPSSPSTEVR	[K].MVSEAPGVPSSPSTEVR.[T]	1xOxidation [M1]; 1xTMTpro [N-Term]; 1xPhospho [S11(99.3)]	1xOxidation [M1]; 1xTMTpro [N-Term]; 1xPhospho [S3(0); S10(0); S11(99.3); S13(0.4); T14(0.4)]	6.10315e-05	5.34993e-05	1	1	2	TGGT1_275650-t26_1-p1	TGGT1_275650-t26_1-p1 [16-32]	TGGT1_275650-t26_1-p1 1xPhospho [S18(0); S25(0); S26(99.3); S28(0.4); T29(0.4)]	TGGT1_275650-t26_1-p1 1xPhospho [S26(99.3)]	transcript=TGGT1_275650-t26_1 | gene=TGGT1_275650 | organism=Toxoplasma_gondii_GT1 | gene_product=hypothetical protein | transcript_product=hypothetical protein | location=TGGT1_chrIII:288290-290923(+) | protein_length=877 | sequence_SO=chromosome | SO=protein_coding_gene | is_pseudo=false	0	2130.01	17
FALSE	High	MVSGELAEYGR	[R].MVSGELAEYGR.[R]	1xTMTpro [N-Term]; 1xPhospho [S3(100)]	1xTMTpro [N-Term]; 1xPhospho [S3(100); Y9(0)]	7.80085e-05	5.34993e-05	1	1	10	TGGT1_213950-t26_1-p1	TGGT1_213950-t26_1-p1 [279-289]	TGGT1_213950-t26_1-p1 1xPhospho [S281(100); Y287(0)]	TGGT1_213950-t26_1-p1 1xPhospho [S281(100)]	transcript=TGGT1_213950-t26_1 | gene=TGGT1_213950 | organism=Toxoplasma_gondii_GT1 | gene_product=hypothetical protein | transcript_product=hypothetical protein | location=TGGT1_chrV:1327225-1329387(-) | protein_length=720 | sequence_SO=chromosome | SO=protein_coding_gene | is_pseudo=false	0	1595.75	11	1.011	1.076	1.19	1.19	1.203	1.281	1.417	1.265	1.221	1.234	0.02	0.11	0.25	0.25	0.27	0.36	0.5	0.34	0.29	0.3	0.927953	0.431793	0.432556	0.273691	0.0449461	0.0530028	0.110068	0.207517	0.070989	0.0314389	0.99046
FALSE	High	MVSGELAEYGR	[R].MVSGELAEYGR.[R]	1xOxidation [M1]; 1xTMTpro [N-Term]; 1xPhospho [S3(100)]	1xOxidation [M1]; 1xTMTpro [N-Term]; 1xPhospho [S3(100); Y9(0)]	6.95503e-05	5.34993e-05	1	1	7	TGGT1_213950-t26_1-p1	TGGT1_213950-t26_1-p1 [279-289]	TGGT1_213950-t26_1-p1 1xPhospho [S281(100); Y287(0)]	TGGT1_213950-t26_1-p1 1xPhospho [S281(100)]	transcript=TGGT1_213950-t26_1 | gene=TGGT1_213950 | organism=Toxoplasma_gondii_GT1 | gene_product=hypothetical protein | transcript_product=hypothetical protein | location=TGGT1_chrV:1327225-1329387(-) | protein_length=720 | sequence_SO=chromosome | SO=protein_coding_gene | is_pseudo=false	0	1611.74	11
FALSE	High	MYLSHAVDGSANAAEEAFR	[K].MYLSHAVDGSANAAEEAFR.[R]	1xTMTpro [N-Term]; 1xPhospho [S4(100)]	1xTMTpro [N-Term]; 1xPhospho [Y2(0); S4(100); S10(0)]	4.39917e-09	5.34993e-05	1	1	1	TGGT1_211710-t26_1-p1	TGGT1_211710-t26_1-p1 [133-151]	TGGT1_211710-t26_1-p1 1xPhospho [Y134(0); S136(100); S142(0)]	TGGT1_211710-t26_1-p1 1xPhospho [S136(100)]	transcript=TGGT1_211710-t26_1 | gene=TGGT1_211710 | organism=Toxoplasma_gondii_GT1 | gene_product=TB2/DP1, HVA22 family protein [Source:UniProtKB/TrEMBL;Acc:S7VZ61] | transcript_product=TB2/DP1, HVA22 family protein | location=TGGT1_chrIV:1512749-1513255(+) | protein_length=168 | sequence_SO=chromosome | SO=protein_coding_gene | is_pseudo=false	0	2423.1	19	1.078	0.902	0.961	0.752	0.811	0.679	0.723	1.012	1.081	1.131	0.11	-0.15	-0.06	-0.41	-0.3	-0.56	-0.47	0.02	0.11	0.18	0.598238	0.309504	0.803456	0.107613	0.396635	0.00954025	0.310558	0.952212	0.228256	0.313578	0.9387
FALSE	High	MYLSHAVDGSANAAEEAFR	[K].MYLSHAVDGSANAAEEAFR.[R]	1xOxidation [M1]; 1xTMTpro [N-Term]; 1xPhospho [S4(100)]	1xOxidation [M1]; 1xTMTpro [N-Term]; 1xPhospho [Y2(0); S4(100); S10(0)]	7.92529e-05	5.34993e-05	1	1	1	TGGT1_211710-t26_1-p1	TGGT1_211710-t26_1-p1 [133-151]	TGGT1_211710-t26_1-p1 1xPhospho [Y134(0); S136(100); S142(0)]	TGGT1_211710-t26_1-p1 1xPhospho [S136(100)]	transcript=TGGT1_211710-t26_1 | gene=TGGT1_211710 | organism=Toxoplasma_gondii_GT1 | gene_product=TB2/DP1, HVA22 family protein [Source:UniProtKB/TrEMBL;Acc:S7VZ61] | transcript_product=TB2/DP1, HVA22 family protein | location=TGGT1_chrIV:1512749-1513255(+) | protein_length=168 | sequence_SO=chromosome | SO=protein_coding_gene | is_pseudo=false	0	2439.1	19
FALSE	High	MYTSNLEEGSEQTSTCSPSPNR	[R].MYTSNLEEGSEQTSTCSPSPNR.[K]	1xMethylthio [C16]; 1xTMTpro [N-Term]; 1xPhospho [S17(99.4)]	1xMethylthio [C16]; 1xTMTpro [N-Term]; 1xPhospho [Y2(0); T3(0); S4(0); S10(0); T13(0); S14(0); T15(0.3); S17(99.4); S19(0.3)]	1.22222e-07	5.34993e-05	1	1	5	TGGT1_235170-t26_1-p1	TGGT1_235170-t26_1-p1 [414-435]	TGGT1_235170-t26_1-p1 1xMethylthio [C429]; 1xPhospho [Y415(0); T416(0); S417(0); S423(0); T426(0); S427(0); T428(0.3); S430(99.4); S432(0.3)]	TGGT1_235170-t26_1-p1 1xMethylthio [C429]; 1xPhospho [S430(99.4)]	transcript=TGGT1_235170-t26_1 | gene=TGGT1_235170 | organism=Toxoplasma_gondii_GT1 | gene_product=Replication factor C subunit 1 [Source:UniProtKB/TrEMBL;Acc:S7W4E1] | transcript_product=ATPase, AAA family protein | location=TGGT1_chrX:4569043-4580176(+) | protein_length=1260 | sequence_SO=chromosome | SO=protein_coding_gene | is_pseudo=false	0	2848.18	22
FALSE	High	MYTSNLEEGSEQTSTCSPSPNR	[R].MYTSNLEEGSEQTSTCSPSPNR.[K]	1xMethylthio [C16]; 1xTMTpro [N-Term]; 2xPhospho [S17(100); S19(100)]	1xMethylthio [C16]; 1xTMTpro [N-Term]; 2xPhospho [Y2(0); T3(0); S4(0); S10(0); T13(0); S14(0); T15(0); S17(100); S19(100)]	3.31539e-06	5.34993e-05	1	1	1	TGGT1_235170-t26_1-p1	TGGT1_235170-t26_1-p1 [414-435]	TGGT1_235170-t26_1-p1 1xMethylthio [C429]; 2xPhospho [Y415(0); T416(0); S417(0); S423(0); T426(0); S427(0); T428(0); S430(100); S432(100)]	TGGT1_235170-t26_1-p1 1xMethylthio [C429]; 2xPhospho [S430(100); S432(100)]	transcript=TGGT1_235170-t26_1 | gene=TGGT1_235170 | organism=Toxoplasma_gondii_GT1 | gene_product=Replication factor C subunit 1 [Source:UniProtKB/TrEMBL;Acc:S7W4E1] | transcript_product=ATPase, AAA family protein | location=TGGT1_chrX:4569043-4580176(+) | protein_length=1260 | sequence_SO=chromosome | SO=protein_coding_gene | is_pseudo=false	0	2928.15	22
FALSE	High	NAAAQALPATPQSSR	[K].NAAAQALPATPQSSR.[R]	1xTMTpro [N-Term]; 1xPhospho [T10(100)]	1xTMTpro [N-Term]; 1xPhospho [T10(100); S13(0); S14(0)]	1.45248e-09	5.34993e-05	1	1	2	TGGT1_318440-t26_1-p1	TGGT1_318440-t26_1-p1 [1941-1955]	TGGT1_318440-t26_1-p1 1xPhospho [T1950(100); S1953(0); S1954(0)]	TGGT1_318440-t26_1-p1 1xPhospho [T1950(100)]	transcript=TGGT1_318440-t26_1 | gene=TGGT1_318440 | organism=Toxoplasma_gondii_GT1 | gene_product=Helicase associated domain (Ha2) protein [Source:UniProtKB/TrEMBL;Acc:S7UJM8] | transcript_product=helicase associated domain (ha2) protein | location=TGGT1_chrIV:1264045-1277404(-) | protein_length=2234 | sequence_SO=chromosome | SO=protein_coding_gene | is_pseudo=false	0	1866.94	15	1.34	1.543	1.558	0.965	1.294	1.49	1.505	1.268	1.37	1.356	0.42	0.63	0.64	-0.05	0.37	0.58	0.59	0.34	0.45	0.44	0.725956	0.380273	0.381282	0.95357	0.348466	0.277695	0.26169	0.421396	0.19675	0.06434	0.959874
FALSE	High	NAAETEGASEGGREQMEDEPEGK	[R].NAAETEGASEGGREQMEDEPEGK.[R]	1xTMTpro [K23]; 1xTMTpro [N-Term]; 1xPhospho [S9(100)]	1xTMTpro [K23]; 1xTMTpro [N-Term]; 1xPhospho [T5(0); S9(100)]	0.000194813	5.34993e-05	1	1	1	TGGT1_278900-t26_1-p1	TGGT1_278900-t26_1-p1 [485-507]	TGGT1_278900-t26_1-p1 1xPhospho [T489(0); S493(100)]	TGGT1_278900-t26_1-p1 1xPhospho [S493(100)]	transcript=TGGT1_278900-t26_1 | gene=TGGT1_278900 | organism=Toxoplasma_gondii_GT1 | gene_product=putative protein kinase | transcript_product=putative protein kinase | location=TGGT1_chrXII:5685638-5689516(-) | protein_length=602 | sequence_SO=chromosome | SO=protein_coding_gene | is_pseudo=false	1	3109.39	23
FALSE	High	NAAETEGASEGGREQMEDEPEGK	[R].NAAETEGASEGGREQMEDEPEGK.[R]	1xOxidation [M16]; 1xTMTpro [K23]; 1xTMTpro [N-Term]; 1xPhospho [S9(100)]	1xOxidation [M16]; 1xTMTpro [K23]; 1xTMTpro [N-Term]; 1xPhospho [T5(0); S9(100)]	7.94237e-06	5.34993e-05	1	1	1	TGGT1_278900-t26_1-p1	TGGT1_278900-t26_1-p1 [485-507]	TGGT1_278900-t26_1-p1 1xPhospho [T489(0); S493(100)]	TGGT1_278900-t26_1-p1 1xPhospho [S493(100)]	transcript=TGGT1_278900-t26_1 | gene=TGGT1_278900 | organism=Toxoplasma_gondii_GT1 | gene_product=putative protein kinase | transcript_product=putative protein kinase | location=TGGT1_chrXII:5685638-5689516(-) | protein_length=602 | sequence_SO=chromosome | SO=protein_coding_gene | is_pseudo=false	1	3125.39	23
FALSE	High	MTTHSVQACDYFTTDSALSNK	[R].MTTHSVQACDYFTTDSALSNK.[K]	1xMethylthio [C9]; 1xTMTpro [K21]; 1xTMTpro [N-Term]; 1xPhospho [T/S/Y]	1xMethylthio [C9]; 1xTMTpro [K21]; 1xTMTpro [N-Term]; 1xPhospho [T2(33.3); T3(33.3); S5(33.3); Y11(0); T13(0); T14(0); S16(0); S19(0)]	3.76343e-05	5.34993e-05	1	1	2	TGGT1_272520-t26_1-p1	TGGT1_272520-t26_1-p1 [183-203]	TGGT1_272520-t26_1-p1 1xMethylthio [C191]	TGGT1_272520-t26_1-p1 1xMethylthio [C191]	transcript=TGGT1_272520-t26_1 | gene=TGGT1_272520 | organism=Toxoplasma_gondii_GT1 | gene_product=hypothetical protein | transcript_product=hypothetical protein | location=TGGT1_chrVIII:3922939-3924461(+) | protein_length=401 | sequence_SO=chromosome | SO=protein_coding_gene | is_pseudo=false	0	3054.39	21	0.861	1.006	0.892	1.01	0.869	1.015	0.9	0.939	0.798	0.83	-0.22	0.01	-0.17	0.01	-0.2	0.02	-0.15	-0.09	-0.33	-0.27	0.254861	0.944857	0.470021	0.704689	0.338398	0.798947	0.551158	0.735679	0.334696	0.0573486	0.900211
FALSE	High	NACDGASHIPTESHER	[R].NACDGASHIPTESHER.[E]	1xMethylthio [C3]; 1xTMTpro [N-Term]; 1xPhospho [S13(100)]	1xMethylthio [C3]; 1xTMTpro [N-Term]; 1xPhospho [S7(0); T11(0); S13(100)]	8.57773e-05	5.34993e-05	1	1	4	TGGT1_293320-t26_1-p1	TGGT1_293320-t26_1-p1 [820-835]	TGGT1_293320-t26_1-p1 1xMethylthio [C822]; 1xPhospho [S826(0); T830(0); S832(100)]	TGGT1_293320-t26_1-p1 1xMethylthio [C822]; 1xPhospho [S832(100)]	transcript=TGGT1_293320-t26_1 | gene=TGGT1_293320 | organism=Toxoplasma_gondii_GT1 | gene_product=hypothetical protein | transcript_product=hypothetical protein | location=TGGT1_chrIa:232486-245499(+) | protein_length=1860 | sequence_SO=chromosome | SO=protein_coding_gene | is_pseudo=false	0	2153.91	16
FALSE	High	NADSPSSLFPSASALGLSVR	[R].NADSPSSLFPSASALGLSVR.[D]	1xTMTpro [N-Term]; 1xPhospho [S4(100)]	1xTMTpro [N-Term]; 1xPhospho [S4(100); S6(0); S7(0); S11(0); S13(0); S18(0)]	4.43036e-06	5.34993e-05	1	1	1	TGGT1_201150-t26_1-p1	TGGT1_201150-t26_1-p1 [1341-1360]	TGGT1_201150-t26_1-p1 1xPhospho [S1344(100); S1346(0); S1347(0); S1351(0); S1353(0); S1358(0)]	TGGT1_201150-t26_1-p1 1xPhospho [S1344(100)]	transcript=TGGT1_201150-t26_1 | gene=TGGT1_201150 | organism=Toxoplasma_gondii_GT1 | gene_product=Heavy metal translocating P-type ATPase subfamily protein [Source:UniProtKB/TrEMBL;Acc:S7WB84] | transcript_product=heavy metal translocating P-type ATPase subfamily protein | location=TGGT1_chrVIIa:3895489-3905933(+) | protein_length=1965 | sequence_SO=chromosome | SO=protein_coding_gene | is_pseudo…	0	2360.18	20
FALSE	High	NAECVENLDAGGGVHCK	[K].NAECVENLDAGGGVHCK.[C]	2xMethylthio [C4; C16]; 1xTMTpro [K17]; 1xTMTpro [N-Term]	2xMethylthio [C4; C16]; 1xTMTpro [K17]; 1xTMTpro [N-Term]	2.73135e-09	5.34993e-05	1	1	3	TGGT1_319560-t26_1-p1	TGGT1_319560-t26_1-p1 [157-173]	TGGT1_319560-t26_1-p1 2xMethylthio [C160; C172]	TGGT1_319560-t26_1-p1 2xMethylthio [C160; C172]	transcript=TGGT1_319560-t26_1 | gene=TGGT1_319560 | organism=Toxoplasma_gondii_GT1 | gene_product=EGF-like domain-containing protein [Source:UniProtKB/TrEMBL;Acc:S7VSV0] | transcript_product=microneme protein MIC3 | location=TGGT1_chrIV:856315-857588(+) | protein_length=383 | sequence_SO=chromosome | SO=protein_coding_gene | is_pseudo=false	0	2416.14	17	0.973	0.876	1.261	1.07	1.041	0.937	1.35	0.968	1.316	1.549	-0.04	-0.19	0.33	0.1	0.06	-0.09	0.43	-0.05	0.4	0.63	0.927098	0.798591	0.602037	0.861652	0.658192	0.629331	0.0308855	0.922415	0.0133215	0.00869759	0.99046
FALSE	High	NAELESEEER	[K].NAELESEEER.[Q]	1xTMTpro [N-Term]; 1xPhospho [S6(100)]	1xTMTpro [N-Term]; 1xPhospho [S6(100)]	0.000163216	5.34993e-05	1	1	3	TGGT1_310330-t26_1-p1	TGGT1_310330-t26_1-p1 [199-208]	TGGT1_310330-t26_1-p1 1xPhospho [S204(100)]	TGGT1_310330-t26_1-p1 1xPhospho [S204(100)]	transcript=TGGT1_310330-t26_1 | gene=TGGT1_310330 | organism=Toxoplasma_gondii_GT1 | gene_product=hypothetical protein | transcript_product=hypothetical protein | location=TGGT1_chrXI:1227355-1230872(-) | protein_length=645 | sequence_SO=chromosome | SO=protein_coding_gene | is_pseudo=false	0	1589.7	10	0.866	1.024	0.799	1.116	0.967	1.142	0.892	1.086	0.985	1.018	-0.21	0.03	-0.32	0.16	-0.05	0.19	-0.16	0.12	-0.02	0.03	0.500139	0.620575	0.226252	0.0928496	0.834779	0.231469	0.455161	0.762826	0.886695	0.850814	0.924635
FALSE	High	NAELESEEERQFETDQAR	[K].NAELESEEERQFETDQAR.[E]	1xTMTpro [N-Term]; 1xPhospho [S6(100)]	1xTMTpro [N-Term]; 1xPhospho [S6(100); T14(0)]	2.97827e-05	5.34993e-05	1	1	1	TGGT1_310330-t26_1-p1	TGGT1_310330-t26_1-p1 [199-216]	TGGT1_310330-t26_1-p1 1xPhospho [S204(100); T212(0)]	TGGT1_310330-t26_1-p1 1xPhospho [S204(100)]	transcript=TGGT1_310330-t26_1 | gene=TGGT1_310330 | organism=Toxoplasma_gondii_GT1 | gene_product=hypothetical protein | transcript_product=hypothetical protein | location=TGGT1_chrXI:1227355-1230872(-) | protein_length=645 | sequence_SO=chromosome | SO=protein_coding_gene | is_pseudo=false	1	2565.14	18
FALSE	High	NAFHSPGEEDAVGEETEDKGDEEWVPPR	[R].NAFHSPGEEDAVGEETEDKGDEEWVPPR.[R]	1xTMTpro [K19]; 1xTMTpro [N-Term]; 1xPhospho [S5(100)]	1xTMTpro [K19]; 1xTMTpro [N-Term]; 1xPhospho [S5(100); T16(0)]	2.11441e-07	5.34993e-05	1	1	5	TGGT1_304630-t26_1-p1	TGGT1_304630-t26_1-p1 [1511-1538]	TGGT1_304630-t26_1-p1 1xPhospho [S1515(100); T1526(0)]	TGGT1_304630-t26_1-p1 1xPhospho [S1515(100)]	transcript=TGGT1_304630-t26_1 | gene=TGGT1_304630 | organism=Toxoplasma_gondii_GT1 | gene_product=ATG C terminal domain-containing protein [Source:UniProtKB/TrEMBL;Acc:S7W9P3] | transcript_product=ATG C terminal domain-containing protein | location=TGGT1_chrVIIa:524945-552364(+) | protein_length=8080 | sequence_SO=chromosome | SO=protein_coding_gene | is_pseudo=false	1	3814.74	28	0.966	0.949	0.898	0.848	0.819	0.804	0.762	0.838	0.736	0.751	-0.05	-0.08	-0.16	-0.24	-0.29	-0.31	-0.39	-0.26	-0.44	-0.41	0.935746	0.514405	0.836336	0.732663	0.0978539	0.698456	0.0915147	0.545129	0.193982	0.512932	0.991787
FALSE	High	NAGPDGDESDDDILVLNGPR	[R].NAGPDGDESDDDILVLNGPR.[V]	1xTMTpro [N-Term]; 1xPhospho [S9(100)]	1xTMTpro [N-Term]; 1xPhospho [S9(100)]	1.14119e-08	5.34993e-05	1	1	2	TGGT1_254340-t26_1-p1	TGGT1_254340-t26_1-p1 [102-121]	TGGT1_254340-t26_1-p1 1xPhospho [S110(100)]	TGGT1_254340-t26_1-p1 1xPhospho [S110(100)]	transcript=TGGT1_254340-t26_1 | gene=TGGT1_254340 | organism=Toxoplasma_gondii_GT1 | gene_product=SAYSvFN domain-containing protein [Source:UniProtKB/TrEMBL;Acc:A0A125YFG0] | transcript_product=hypothetical protein | location=TGGT1_chrIII:1600888-1602684(+) | protein_length=150 | sequence_SO=chromosome | SO=protein_coding_gene | is_pseudo=false	0	2453.12	20
FALSE	High	NAGSDTDRPLDIEDLTVVVTPAR	[R].NAGSDTDRPLDIEDLTVVVTPAR.[D]	1xTMTpro [N-Term]; 1xPhospho [S4(100)]	1xTMTpro [N-Term]; 1xPhospho [S4(100); T6(0); T16(0); T20(0)]	8.1011e-10	5.34993e-05	1	1	1	TGGT1_253140-t26_1-p1	TGGT1_253140-t26_1-p1 [574-596]	TGGT1_253140-t26_1-p1 1xPhospho [S577(100); T579(0); T589(0); T593(0)]	TGGT1_253140-t26_1-p1 1xPhospho [S577(100)]	transcript=TGGT1_253140-t26_1 | gene=TGGT1_253140 | organism=Toxoplasma_gondii_GT1 | gene_product=hypothetical protein | transcript_product=hypothetical protein | location=TGGT1_chrIII:753985-759307(-) | protein_length=1519 | sequence_SO=chromosome | SO=protein_coding_gene | is_pseudo=false	0	2838.42	23	0.867	0.861	0.663	1.102	0.955	0.949	0.73	1.009	0.914	0.707	-0.21	-0.22	-0.59	0.14	-0.07	-0.08	-0.45	0.01	-0.13	-0.5	0.154965	0.135238	0.0181497	0.47609	0.777666	0.533788	0.199556	0.945941	0.0635529	0.398441	0.89534
FALSE	High	NAHDPVEGHSVDSPK	[R].NAHDPVEGHSVDSPK.[F]	1xTMTpro [K15]; 1xTMTpro [N-Term]; 1xPhospho [S13(100)]	1xTMTpro [K15]; 1xTMTpro [N-Term]; 1xPhospho [S10(0); S13(100)]	4.99e-10	5.34993e-05	1	1	5	TGGT1_279410-t26_1-p1	TGGT1_279410-t26_1-p1 [194-208]	TGGT1_279410-t26_1-p1 1xPhospho [S203(0); S206(100)]	TGGT1_279410-t26_1-p1 1xPhospho [S206(100)]	transcript=TGGT1_279410-t26_1 | gene=TGGT1_279410 | organism=Toxoplasma_gondii_GT1 | gene_product=hypothetical protein | transcript_product=hypothetical protein | location=TGGT1_chrIX:33522-35139(+) | protein_length=384 | sequence_SO=chromosome | SO=protein_coding_gene | is_pseudo=false	0	2277.12	15	0.946	1.033	1.07	1.192	1.127	1.231	1.275	1.082	1.101	1.214	-0.08	0.05	0.1	0.25	0.17	0.3	0.35	0.11	0.14	0.28	0.0358565	0.587643	0.513356	0.173703	0.233287	0.0184626	0.0568148	0.525934	0.0894142	0.119454	0.8946
FALSE	High	NAHDPVEGHSVDSPKFEEGHTK	[R].NAHDPVEGHSVDSPKFEEGHTK.[A]	2xTMTpro [K15; K22]; 1xTMTpro [N-Term]; 1xPhospho [S13(99.6)]	2xTMTpro [K15; K22]; 1xTMTpro [N-Term]; 1xPhospho [S10(0.4); S13(99.6); T21(0)]	3.08666e-06	5.34993e-05	1	1	1	TGGT1_279410-t26_1-p1	TGGT1_279410-t26_1-p1 [194-215]	TGGT1_279410-t26_1-p1 1xPhospho [S203(0.4); S206(99.6); T214(0)]	TGGT1_279410-t26_1-p1 1xPhospho [S206(99.6)]	transcript=TGGT1_279410-t26_1 | gene=TGGT1_279410 | organism=Toxoplasma_gondii_GT1 | gene_product=hypothetical protein | transcript_product=hypothetical protein | location=TGGT1_chrIX:33522-35139(+) | protein_length=384 | sequence_SO=chromosome | SO=protein_coding_gene | is_pseudo=false	1	3409.7	22	1.486	0.792	0.999	0.985	1.464	0.78	0.984	1.147	0.902	0.974	0.57	-0.34	0	-0.02	0.55	-0.36	-0.02	0.2	-0.15	-0.04	0.0487798	0.317552	0.997158	0.973953	0.465872	0.497268	0.950109	0.26278	0.561138	0.951507	0.8946
FALSE	High	NAKPGSEEAVASER	[R].NAKPGSEEAVASER.[T]	1xTMTpro [K3]; 1xTMTpro [N-Term]; 1xPhospho [S6(100)]	1xTMTpro [K3]; 1xTMTpro [N-Term]; 1xPhospho [S6(100); S12(0)]	5.61724e-07	5.34993e-05	1	1	1	TGGT1_313590A-t26_1-p1	TGGT1_313590A-t26_1-p1 [719-732]	TGGT1_313590A-t26_1-p1 1xPhospho [S724(100); S730(0)]	TGGT1_313590A-t26_1-p1 1xPhospho [S724(100)]	transcript=TGGT1_313590A-t26_1 | gene=TGGT1_313590A | organism=Toxoplasma_gondii_GT1 | gene_product=FPL domain-containing protein [Source:UniProtKB/TrEMBL;Acc:S7W9E0] | transcript_product=hypothetical protein | location=TGGT1_chrXI:3460261-3471307(-) | protein_length=1716 | sequence_SO=chromosome | SO=protein_coding_gene | is_pseudo=false	0	2133.08	14	1.095	0.995	0.933	1.001	1.097	0.996	0.935	0.904	0.918	0.956	0.13	-0.01	-0.1	0	0.13	-0.01	-0.1	-0.14	-0.12	-0.07	0.0537984	0.945244	0.199004	0.878309	0.0952216	0.952797	0.148458	0.480023	0.41308	0.679844	0.8946
FALSE	High	NAKPYPAAGALQAGSQPGAAGPVSPTK	[K].NAKPYPAAGALQAGSQPGAAGPVSPTK.[A]	2xTMTpro [K3; K27]; 1xTMTpro [N-Term]; 1xPhospho [S24(100)]	2xTMTpro [K3; K27]; 1xTMTpro [N-Term]; 1xPhospho [Y5(0); S15(0); S24(100); T26(0)]	2.73926e-10	5.34993e-05	1	1	1	TGGT1_289710-t26_1-p1	TGGT1_289710-t26_1-p1 [921-947]	TGGT1_289710-t26_1-p1 1xPhospho [Y925(0); S935(0); S944(100); T946(0)]	TGGT1_289710-t26_1-p1 1xPhospho [S944(100)]	transcript=TGGT1_289710-t26_1 | gene=TGGT1_289710 | organism=Toxoplasma_gondii_GT1 | gene_product=AP2 domain transcription factor AP2IX-5 [Source:UniProtKB/TrEMBL;Acc:S7VXQ6] | transcript_product=AP2 domain transcription factor AP2IX-5 | location=TGGT1_chrIX:3197843-3204697(+) | protein_length=2284 | sequence_SO=chromosome | SO=protein_coding_gene | is_pseudo=false	0	3498.89	27
FALSE	High	NALIHDGLVR	[K].NALIHDGLVR.[G]	1xTMTpro [N-Term]	1xTMTpro [N-Term]	2.85947e-07	5.34993e-05	1	1	3	TGGT1_205340-t26_1-p1	TGGT1_205340-t26_1-p1 [34-43]			transcript=TGGT1_205340-t26_1 | gene=TGGT1_205340 | organism=Toxoplasma_gondii_GT1 | gene_product=40S ribosomal protein S12 [Source:UniProtKB/TrEMBL;Acc:A0A125YN62] | transcript_product=ribosomal protein RPS12 | location=TGGT1_chrVIIa:1379775-1380954(+) | protein_length=142 | sequence_SO=chromosome | SO=protein_coding_gene | is_pseudo=false	0	1411.83	10
FALSE	High	NADSEVEELYAEK	[K].NADSEVEELYAEK.[L]	1xTMTpro [K13]; 1xTMTpro [N-Term]; 1xPhospho [S4(100)]	1xTMTpro [K13]; 1xTMTpro [N-Term]; 1xPhospho [S4(100); Y10(0)]	3.47722e-06	5.34993e-05	1	1	3	TGGT1_462965-t26_1-p1	TGGT1_462965-t26_1-p1 [3675-3687]	TGGT1_462965-t26_1-p1 1xPhospho [S3678(100); Y3684(0)]	TGGT1_462965-t26_1-p1 1xPhospho [S3678(100)]	transcript=TGGT1_462965-t26_1 | gene=TGGT1_462965 | organism=Toxoplasma_gondii_GT1 | gene_product=FH2 domain-containing protein [Source:UniProtKB/TrEMBL;Acc:S7W2S6] | transcript_product=formin domain-containing protein | location=TGGT1_chrVIIa:949217-965406(-) | protein_length=4707 | sequence_SO=chromosome | SO=protein_coding_gene | is_pseudo=false	0	2185.06	13
FALSE	High	NALPPGLGSQNGESDESLVSK	[R].NALPPGLGSQNGESDESLVSK.[L]	1xTMTpro [K21]; 1xTMTpro [N-Term]	1xTMTpro [K21]; 1xTMTpro [N-Term]	2.51073e-06	5.34993e-05	1	1	1	TGGT1_201780-t26_1-p1	TGGT1_201780-t26_1-p1 [429-449]			transcript=TGGT1_201780-t26_1 | gene=TGGT1_201780 | organism=Toxoplasma_gondii_GT1 | gene_product=VWFA domain-containing protein [Source:UniProtKB/TrEMBL;Acc:A0A125YK19] | transcript_product=microneme protein MIC2 | location=TGGT1_chrVIIa:3693727-3696991(-) | protein_length=769 | sequence_SO=chromosome | SO=protein_coding_gene | is_pseudo=false	0	2707.44	21	1.085	0.903	0.958	0.958	1.04	0.866	0.918	0.762	0.754	0.896	0.12	-0.15	-0.06	-0.06	0.06	-0.21	-0.12	-0.39	-0.41	-0.16	0.195872	0.68194	0.764429	0.0144316	0.363438	0.581796	0.582685	0.407452	0.407556	0.336045	0.900211
FALSE	High	MTSTSAGLEPAEAWR	[R].MTSTSAGLEPAEAWR.[E]	1xTMTpro [N-Term]; 1xPhospho [S3(99.6)]	1xTMTpro [N-Term]; 1xPhospho [T2(0.2); S3(99.6); T4(0.2); S5(0)]	7.42394e-06	5.34993e-05	1	1	1	TGGT1_297180-t26_1-p1	TGGT1_297180-t26_1-p1 [98-112]	TGGT1_297180-t26_1-p1 1xPhospho [T99(0.2); S100(99.6); T101(0.2); S102(0)]	TGGT1_297180-t26_1-p1 1xPhospho [S100(99.6)]	transcript=TGGT1_297180-t26_1 | gene=TGGT1_297180 | organism=Toxoplasma_gondii_GT1 | gene_product=hypothetical protein | transcript_product=hypothetical protein | location=TGGT1_chrII:1568655-1575825(-) | protein_length=871 | sequence_SO=chromosome | SO=protein_coding_gene | is_pseudo=false	0	1990.93	15	1.308	1.494	1.327	0.731	0.956	1.092	0.97	0.997	1.039	0.922	0.39	0.58	0.41	-0.45	-0.06	0.13	-0.04	0	0.06	-0.12	0.292588	0.0244509	0.363223	0.321979	0.469065	0.722607	0.161663	0.975543	0.813835	0.624163	0.904778
FALSE	High	MTQAELAQAINEKPSVVNDYESGR	[K].MTQAELAQAINEKPSVVNDYESGR.[A]	1xTMTpro [K13]; 1xTMTpro [N-Term]; 1xPhospho [S15(100)]	1xTMTpro [K13]; 1xTMTpro [N-Term]; 1xPhospho [T2(0); S15(100); Y20(0); S22(0)]	6.36272e-13	5.34993e-05	1	1	1	TGGT1_278530-t26_1-p1	TGGT1_278530-t26_1-p1 [91-114]	TGGT1_278530-t26_1-p1 1xPhospho [T92(0); S105(100); Y110(0); S112(0)]	TGGT1_278530-t26_1-p1 1xPhospho [S105(100)]	transcript=TGGT1_278530-t26_1 | gene=TGGT1_278530 | organism=Toxoplasma_gondii_GT1 | gene_product=HTH cro/C1-type domain-containing protein [Source:UniProtKB/TrEMBL;Acc:A0A125YYC2] | transcript_product=putative multiprotein bridging factor type 1 family transcriptional co-activator | location=TGGT1_chrXII:5951968-5953739(+) | protein_length=144 | sequence_SO=chromosome | SO=protein_coding_gene | …	0	3338.66	24	0.623	1.702	2.85	1.464	0.913	2.492	4.174	0.926	2.966	6.327	-0.68	0.77	1.51	0.55	-0.13	1.32	2.06	-0.11	1.57	2.66	0.0169499	0.565931	0.527753	0.556573	0.877818	0.136519	0.285251	0.786754	0.0156009	0.155616	0.8946
FALSE	High	MSHEALTETAR	[K].MSHEALTETAR.[K]	1xTMTpro [N-Term]; 1xPhospho [T9(99.8)]	1xTMTpro [N-Term]; 1xPhospho [S2(0); T7(0.2); T9(99.8)]	0.000448736	5.34993e-05	1	1	6	TGGT1_236570-t26_1-p1	TGGT1_236570-t26_1-p1 [5-15]	TGGT1_236570-t26_1-p1 1xPhospho [S6(0); T11(0.2); T13(99.8)]	TGGT1_236570-t26_1-p1 1xPhospho [T13(99.8)]	transcript=TGGT1_236570-t26_1 | gene=TGGT1_236570 | organism=Toxoplasma_gondii_GT1 | gene_product=Lysine decarboxylase family protein [Source:UniProtKB/TrEMBL;Acc:S7W5X6] | transcript_product=lysine decarboxylase family protein | location=TGGT1_chrX:5322842-5325476(+) | protein_length=397 | sequence_SO=chromosome | SO=protein_coding_gene | is_pseudo=false	0	1629.76	11
FALSE	High	MSHPETLQGPSK	[R].MSHPETLQGPSK.[A]	1xTMTpro [K12]; 1xTMTpro [N-Term]; 1xPhospho [S2(100)]	1xTMTpro [K12]; 1xTMTpro [N-Term]; 1xPhospho [S2(100); T6(0); S11(0)]	2.14264e-05	5.34993e-05	1	1	1	TGGT1_253750-t26_1-p1	TGGT1_253750-t26_1-p1 [152-163]	TGGT1_253750-t26_1-p1 1xPhospho [S153(100); T157(0); S162(0)]	TGGT1_253750-t26_1-p1 1xPhospho [S153(100)]	transcript=TGGT1_253750-t26_1 | gene=TGGT1_253750 | organism=Toxoplasma_gondii_GT1 | gene_product=PLU-1 domain-containing protein [Source:UniProtKB/TrEMBL;Acc:S7ULT6] | transcript_product=PLU-1 family protein | location=TGGT1_chrIII:1126566-1154665(-) | protein_length=8088 | sequence_SO=chromosome | SO=protein_coding_gene | is_pseudo=false	0	2000.02	12	1.065	1.071	1.001	0.916	0.976	0.981	0.917	0.894	0.951	1.029	0.09	0.1	0	-0.13	-0.03	-0.03	-0.12	-0.16	-0.07	0.04	0.628937	0.342812	0.982135	0.589297	0.444526	0.841223	0.684415	0.12938	0.752834	0.762195	0.945702
FALSE	High	MSPAEDSDKAPTEGNDSEK	[K].MSPAEDSDKAPTEGNDSEK.[R]	2xTMTpro [K9; K19]; 1xTMTpro [N-Term]; 1xPhospho [S7(100)]	2xTMTpro [K9; K19]; 1xTMTpro [N-Term]; 1xPhospho [S2(0); S7(100); T12(0); S17(0)]	0.000154462	5.34993e-05	1	1	2	TGGT1_224890-t26_1-p1	TGGT1_224890-t26_1-p1 [328-346]	TGGT1_224890-t26_1-p1 1xPhospho [S329(0); S334(100); T339(0); S344(0)]	TGGT1_224890-t26_1-p1 1xPhospho [S334(100)]	transcript=TGGT1_224890-t26_1 | gene=TGGT1_224890 | organism=Toxoplasma_gondii_GT1 | gene_product=hypothetical protein | transcript_product=hypothetical protein | location=TGGT1_chrX:2618782-2623220(-) | protein_length=1075 | sequence_SO=chromosome | SO=protein_coding_gene | is_pseudo=false	1	3000.43	19	0.777	0.757	0.927	1.268	0.985	0.96	1.175	1.067	1.257	1.223	-0.36	-0.4	-0.11	0.34	-0.02	-0.06	0.23	0.09	0.33	0.29	0.0419293	0.122384	0.840567	0.386218	0.937049	0.773098	0.439455	0.872714	0.329005	0.346043	0.8946
FALSE	High	MSPAEDSDKAPTEGNDSEK	[K].MSPAEDSDKAPTEGNDSEK.[R]	1xOxidation [M1]; 2xTMTpro [K9; K19]; 1xTMTpro [N-Term]; 1xPhospho [S7(99.7)]	1xOxidation [M1]; 2xTMTpro [K9; K19]; 1xTMTpro [N-Term]; 1xPhospho [S2(0.3); S7(99.7); T12(0); S17(0)]	1.17586e-06	5.34993e-05	1	1	3	TGGT1_224890-t26_1-p1	TGGT1_224890-t26_1-p1 [328-346]	TGGT1_224890-t26_1-p1 1xPhospho [S329(0.3); S334(99.7); T339(0); S344(0)]	TGGT1_224890-t26_1-p1 1xPhospho [S334(99.7)]	transcript=TGGT1_224890-t26_1 | gene=TGGT1_224890 | organism=Toxoplasma_gondii_GT1 | gene_product=hypothetical protein | transcript_product=hypothetical protein | location=TGGT1_chrX:2618782-2623220(-) | protein_length=1075 | sequence_SO=chromosome | SO=protein_coding_gene | is_pseudo=false	1	3016.43	19	1.168	1.131	1.021	0.959	1.12	1.085	0.98	0.921	1.133	0.937	0.22	0.18	0.03	-0.06	0.16	0.12	-0.03	-0.12	0.18	-0.09	0.705811	0.382182	0.897198	0.870683	0.490251	0.822842	0.823759	0.59433	0.392584	0.783156	0.957722
FALSE	High	MSPDSSSGSVESAVKPGEPASGESAPTGHVK	[R].MSPDSSSGSVESAVKPGEPASGESAPTGHVK.[K]	2xTMTpro [K15; K31]; 1xTMTpro [N-Term]; 1xPhospho [S/T]	2xTMTpro [K15; K31]; 1xTMTpro [N-Term]; 1xPhospho [S2(0); S5(0.2); S6(33.3); S7(33.3); S9(33.3); S12(0); S21(0); S24(0); T27(0)]	1.6811e-06	5.34993e-05	1	1	1	TGGT1_307810-t26_1-p1	TGGT1_307810-t26_1-p1 [27-57]			transcript=TGGT1_307810-t26_1 | gene=TGGT1_307810 | organism=Toxoplasma_gondii_GT1 | gene_product=hypothetical protein | transcript_product=hypothetical protein | location=TGGT1_chrXII:366832-371762(-) | protein_length=433 | sequence_SO=chromosome | SO=protein_coding_gene | is_pseudo=false	0	3961.97	31
FALSE	High	MSPYYPAEETGASAPLTAAGSMVMGGMK	[R].MSPYYPAEETGASAPLTAAGSMVMGGMK.[S]	1xTMTpro [K28]; 1xTMTpro [N-Term]; 1xPhospho [S21(100)]	1xTMTpro [K28]; 1xTMTpro [N-Term]; 1xPhospho [S2(0); Y4(0); Y5(0); T10(0); S13(0); T17(0); S21(100)]	6.72236e-06	5.34993e-05	1	1	2	TGGT1_271970-t26_1-p1	TGGT1_271970-t26_1-p1 [276-303]	TGGT1_271970-t26_1-p1 1xPhospho [S277(0); Y279(0); Y280(0); T285(0); S288(0); T292(0); S296(100)]	TGGT1_271970-t26_1-p1 1xPhospho [S296(100)]	transcript=TGGT1_271970-t26_1 | gene=TGGT1_271970 | organism=Toxoplasma_gondii_GT1 | gene_product=Glideosome-associated protein with multiple-membrane spans GAPM3 [Source:UniProtKB/TrEMBL;Acc:A0A125YP90] | transcript_product=glideosome-associated protein with multiple-membrane spans GAPM3 | location=TGGT1_chrVIII:4254025-4255814(+) | protein_length=310 | sequence_SO=chromosome | SO=protein_coding…	0	3493.64	28	1.579	1.907	1.839	1.002	1.582	1.911	1.842	1.598	4.037	2.105	0.66	0.93	0.88	0	0.66	0.93	0.88	0.68	2.01	1.07	0.00217094	0.12025	0.181514	0.988376	0.138763	0.0229854	0.0813275	0.190839	0.062424	0.111078	0.8946
FALSE	High	MSPYYPAEETGASAPLTAAGSMVMGGMK	[R].MSPYYPAEETGASAPLTAAGSMVMGGMK.[S]	1xOxidation [M27]; 1xTMTpro [K28]; 1xTMTpro [N-Term]; 1xPhospho [S21(100)]	1xOxidation [M27]; 1xTMTpro [K28]; 1xTMTpro [N-Term]; 1xPhospho [S2(0); Y4(0); Y5(0); T10(0); S13(0); T17(0); S21(100)]	4.95417e-13	5.34993e-05	1	1	1	TGGT1_271970-t26_1-p1	TGGT1_271970-t26_1-p1 [276-303]	TGGT1_271970-t26_1-p1 1xPhospho [S277(0); Y279(0); Y280(0); T285(0); S288(0); T292(0); S296(100)]	TGGT1_271970-t26_1-p1 1xPhospho [S296(100)]	transcript=TGGT1_271970-t26_1 | gene=TGGT1_271970 | organism=Toxoplasma_gondii_GT1 | gene_product=Glideosome-associated protein with multiple-membrane spans GAPM3 [Source:UniProtKB/TrEMBL;Acc:A0A125YP90] | transcript_product=glideosome-associated protein with multiple-membrane spans GAPM3 | location=TGGT1_chrVIII:4254025-4255814(+) | protein_length=310 | sequence_SO=chromosome | SO=protein_coding…	0	3509.64	28	1.261	1.664	1.502	1.03	1.298	1.714	1.547	1.648	2.645	1.909	0.33	0.73	0.59	0.04	0.38	0.78	0.63	0.72	1.4	0.93	0.0317186	0.0678237	0.277934	0.153783	0.0104649	0.0726165	0.27012	0.0017566	0.134454	0.0622629	0.8946
FALSE	High	MSPYYPAEETGASAPLTAAGSMVMGGMK	[R].MSPYYPAEETGASAPLTAAGSMVMGGMK.[S]	2xOxidation [M24; M27]; 1xTMTpro [K28]; 1xTMTpro [N-Term]; 1xPhospho [S21(100)]	2xOxidation [M24; M27]; 1xTMTpro [K28]; 1xTMTpro [N-Term]; 1xPhospho [S2(0); Y4(0); Y5(0); T10(0); S13(0); T17(0); S21(100)]	2.38198e-07	5.34993e-05	1	1	2	TGGT1_271970-t26_1-p1	TGGT1_271970-t26_1-p1 [276-303]	TGGT1_271970-t26_1-p1 1xPhospho [S277(0); Y279(0); Y280(0); T285(0); S288(0); T292(0); S296(100)]	TGGT1_271970-t26_1-p1 1xPhospho [S296(100)]	transcript=TGGT1_271970-t26_1 | gene=TGGT1_271970 | organism=Toxoplasma_gondii_GT1 | gene_product=Glideosome-associated protein with multiple-membrane spans GAPM3 [Source:UniProtKB/TrEMBL;Acc:A0A125YP90] | transcript_product=glideosome-associated protein with multiple-membrane spans GAPM3 | location=TGGT1_chrVIII:4254025-4255814(+) | protein_length=310 | sequence_SO=chromosome | SO=protein_coding…	0	3525.63	28
FALSE	High	MSPYYPAEETGASAPLTAAGSMVMGGMK	[R].MSPYYPAEETGASAPLTAAGSMVMGGMK.[S]	3xOxidation [M22; M24; M27]; 1xTMTpro [K28]; 1xTMTpro [N-Term]; 1xPhospho [S21(100)]	3xOxidation [M1; M22; M24; M27]; 1xTMTpro [K28]; 1xTMTpro [N-Term]; 1xPhospho [S2(0); Y4(0); Y5(0); T10(0); S13(0); T17(0); S21(100)]	1.89328e-10	5.34993e-05	1	1	2	TGGT1_271970-t26_1-p1	TGGT1_271970-t26_1-p1 [276-303]	TGGT1_271970-t26_1-p1 1xPhospho [S277(0); Y279(0); Y280(0); T285(0); S288(0); T292(0); S296(100)]	TGGT1_271970-t26_1-p1 1xPhospho [S296(100)]	transcript=TGGT1_271970-t26_1 | gene=TGGT1_271970 | organism=Toxoplasma_gondii_GT1 | gene_product=Glideosome-associated protein with multiple-membrane spans GAPM3 [Source:UniProtKB/TrEMBL;Acc:A0A125YP90] | transcript_product=glideosome-associated protein with multiple-membrane spans GAPM3 | location=TGGT1_chrVIII:4254025-4255814(+) | protein_length=310 | sequence_SO=chromosome | SO=protein_coding…	0	3541.63	28	1.146	1.482	1.153	0.862	0.989	1.278	0.994	1.207	1.677	1.279	0.2	0.57	0.21	-0.21	-0.02	0.35	-0.01	0.27	0.75	0.35	0.537271	0.265561	0.283212	0.318445	0.900915	0.231601	0.741722	0.292943	0.282525	0.516122	0.928461
FALSE	High	MSPYYPAEETGASAPLTAAGSMVMGGMK	[R].MSPYYPAEETGASAPLTAAGSMVMGGMK.[S]	1xOxidation [M1]; 1xTMTpro [K28]; 1xTMTpro [N-Term]; 2xPhospho [S21(99.3); T/S/Y]	1xOxidation [M1; M24]; 1xTMTpro [K28]; 1xTMTpro [N-Term]; 2xPhospho [S2(0); Y4(0); Y5(0); T10(33.6); S13(33.6); T17(33.6); S21(99.3)]	6.7116e-05	5.34993e-05	1	1	2	TGGT1_271970-t26_1-p1	TGGT1_271970-t26_1-p1 [276-303]	TGGT1_271970-t26_1-p1 2xPhospho [S277(0); Y279(0); Y280(0); T285(33.6); S288(33.6); T292(33.6); S296(99.3)]	TGGT1_271970-t26_1-p1 2xPhospho [S296(99.3); T/S/Y]	transcript=TGGT1_271970-t26_1 | gene=TGGT1_271970 | organism=Toxoplasma_gondii_GT1 | gene_product=Glideosome-associated protein with multiple-membrane spans GAPM3 [Source:UniProtKB/TrEMBL;Acc:A0A125YP90] | transcript_product=glideosome-associated protein with multiple-membrane spans GAPM3 | location=TGGT1_chrVIII:4254025-4255814(+) | protein_length=310 | sequence_SO=chromosome | SO=protein_coding…	0	3589.6	28	1.082	1.218	1.43	0.828	0.895	1.008	1.184	1.13	1.309	1.399	0.11	0.28	0.52	-0.27	-0.16	0.01	0.24	0.18	0.39	0.48	0.445161	0.51041	0.473273	0.238574	0.0481461	0.96071	0.627172	0.384174	0.256394	0.536262	0.913994
FALSE	High	MSSAEPSAGPSTTGR	[R].MSSAEPSAGPSTTGR.[I]	1xTMTpro [N-Term]; 1xPhospho [S/T]	1xTMTpro [N-Term]; 1xPhospho [S2(50); S3(50); S7(0); S11(0); T12(0); T13(0)]	0.00016646	5.34993e-05	1	1	2	TGGT1_268980-t26_1-p1	TGGT1_268980-t26_1-p1 [129-143]			transcript=TGGT1_268980-t26_1 | gene=TGGT1_268980 | organism=Toxoplasma_gondii_GT1 | gene_product=hypothetical protein | transcript_product=hypothetical protein | location=TGGT1_chrVIII:6168360-6169294(-) | protein_length=185 | sequence_SO=chromosome | SO=protein_coding_gene | is_pseudo=false	0	1819.82	15
FALSE	High	MSSELHGAVGPPESLR	[R].MSSELHGAVGPPESLR.[V]	1xTMTpro [N-Term]; 1xPhospho [S]	1xTMTpro [N-Term]; 1xPhospho [S2(50); S3(50); S14(0)]	4.64223e-07	5.34993e-05	1	1	2	TGGT1_312300-t26_1-p1	TGGT1_312300-t26_1-p1 [1506-1521]			transcript=TGGT1_312300-t26_1 | gene=TGGT1_312300 | organism=Toxoplasma_gondii_GT1 | gene_product=Sec7 domain-containing protein [Source:UniProtKB/TrEMBL;Acc:S7UTS9] | transcript_product=Sec7 domain-containing protein | location=TGGT1_chrXI:2538347-2549992(-) | protein_length=3015 | sequence_SO=chromosome | SO=protein_coding_gene | is_pseudo=false	0	2051	16	1.263	1.839	2.094	0.744	0.939	1.367	1.557	1.19	1.398	1.485	0.34	0.88	1.07	-0.43	-0.09	0.45	0.64	0.25	0.48	0.57	0.648072	0.428024	0.383398	0.728032	0.855929	0.310942	0.198634	0.0346479	0.315299	0.344607	0.947964
FALSE	High	MTQAELAQAINEKPSVVNDYESGR	[K].MTQAELAQAINEKPSVVNDYESGR.[A]	1xOxidation [M1]; 1xTMTpro [K13]; 1xTMTpro [N-Term]; 1xPhospho [S15(100)]	1xOxidation [M1]; 1xTMTpro [K13]; 1xTMTpro [N-Term]; 1xPhospho [T2(0); S15(100); Y20(0); S22(0)]	2.97113e-12	5.34993e-05	1	1	1	TGGT1_278530-t26_1-p1	TGGT1_278530-t26_1-p1 [91-114]	TGGT1_278530-t26_1-p1 1xPhospho [T92(0); S105(100); Y110(0); S112(0)]	TGGT1_278530-t26_1-p1 1xPhospho [S105(100)]	transcript=TGGT1_278530-t26_1 | gene=TGGT1_278530 | organism=Toxoplasma_gondii_GT1 | gene_product=HTH cro/C1-type domain-containing protein [Source:UniProtKB/TrEMBL;Acc:A0A125YYC2] | transcript_product=putative multiprotein bridging factor type 1 family transcriptional co-activator | location=TGGT1_chrXII:5951968-5953739(+) | protein_length=144 | sequence_SO=chromosome | SO=protein_coding_gene | …	0	3354.65	24
FALSE	High	MSSSLSGEYCDALHTNFSR	[R].MSSSLSGEYCDALHTNFSR.[R]	1xMethylthio [C10]; 1xTMTpro [N-Term]; 1xPhospho [S6(100)]	1xMethylthio [C10]; 1xTMTpro [N-Term]; 1xPhospho [S2(0); S3(0); S4(0); S6(100); Y9(0); T15(0); S18(0)]	4.40716e-11	5.34993e-05	1	1	1	TGGT1_239250-t26_1-p1	TGGT1_239250-t26_1-p1 [1303-1321]	TGGT1_239250-t26_1-p1 1xMethylthio [C1312]; 1xPhospho [S1304(0); S1305(0); S1306(0); S1308(100); Y1311(0); T1317(0); S1320(0)]	TGGT1_239250-t26_1-p1 1xMethylthio [C1312]; 1xPhospho [S1308(100)]	transcript=TGGT1_239250-t26_1 | gene=TGGT1_239250 | organism=Toxoplasma_gondii_GT1 | gene_product=Diacylglycerol kinase [Source:UniProtKB/TrEMBL;Acc:S7W6A2] | transcript_product=putative diacylglycerol kinase | location=TGGT1_chrVI:477947-486984(-) | protein_length=1841 | sequence_SO=chromosome | SO=protein_coding_gene | is_pseudo=false	0	2535.07	19	1.031	0.959	1.06	0.896	0.924	0.86	0.95	0.932	0.904	0.849	0.04	-0.06	0.08	-0.16	-0.11	-0.22	-0.07	-0.1	-0.15	-0.24	0.830508	0.67743	0.655537	0.414656	0.213991	0.0376406	0.156375	0.792122	0.505366	0.115509	0.976273
FALSE	High	MSSSSLSAEVPSLSAR	[R].MSSSSLSAEVPSLSAR.[E]	1xOxidation [M1]; 1xTMTpro [N-Term]; 1xPhospho [S3(99.6)]	1xOxidation [M1]; 1xTMTpro [N-Term]; 1xPhospho [S2(0); S3(99.6); S4(0.4); S5(0); S7(0); S12(0); S14(0)]	3.45262e-09	5.34993e-05	1	1	7	TGGT1_261480-t26_1-p1	TGGT1_261480-t26_1-p1 [505-520]	TGGT1_261480-t26_1-p1 1xPhospho [S506(0); S507(99.6); S508(0.4); S509(0); S511(0); S516(0); S518(0)]	TGGT1_261480-t26_1-p1 1xPhospho [S507(99.6)]	transcript=TGGT1_261480-t26_1 | gene=TGGT1_261480 | organism=Toxoplasma_gondii_GT1 | gene_product=Phosphatidyl serine synthase [Source:UniProtKB/TrEMBL;Acc:S7UXZ9] | transcript_product=phosphatidyl serine synthase | location=TGGT1_chrVIIb:1685826-1692167(-) | protein_length=540 | sequence_SO=chromosome | SO=protein_coding_gene | is_pseudo=false	0	2008.96	16	1.038	0.96	0.966	0.891	0.925	0.856	0.862	0.874	0.932	0.945	0.05	-0.06	-0.05	-0.17	-0.11	-0.22	-0.21	-0.2	-0.1	-0.08	0.803657	0.379243	0.652616	0.571882	0.815421	0.531597	0.59306	0.588132	0.250095	0.682132	0.973905
FALSE	High	MSTKEVDEQMLNVQNK	[R].MSTKEVDEQMLNVQNK.[N]	2xTMTpro [K4; K16]; 1xTMTpro [N-Term]; 1xPhospho [T3(100)]	2xTMTpro [K4; K16]; 1xTMTpro [N-Term]; 1xPhospho [S2(0); T3(100)]	4.13135e-12	5.34993e-05	1	3	1	TGGT1_266960-t26_1-p1	TGGT1_266960-t26_1-p1 [321-336]	TGGT1_266960-t26_1-p1 1xPhospho [S322(0); T323(100)]	TGGT1_266960-t26_1-p1 1xPhospho [T323(100)]	transcript=TGGT1_266960-t26_1 | gene=TGGT1_266960 | organism=Toxoplasma_gondii_GT1 | gene_product=Tubulin beta chain [Source:UniProtKB/TrEMBL;Acc:A0A125YWG4] | transcript_product=beta-tubulin | location=TGGT1_chrIX:705551-707606(-) | protein_length=449 | sequence_SO=chromosome | SO=protein_coding_gene | is_pseudo=false	1	2886.49	16	1.123	1.414	1.542	1.089	1.222	1.54	1.679	1.25	1.684	1.802	0.17	0.5	0.62	0.12	0.29	0.62	0.75	0.32	0.75	0.85	0.10615	0.0301979	0.107716	0.592115	0.280541	0.141647	0.0493108	0.214853	0.157835	0.00431208	0.8946
FALSE	High	MSTSGLLEHHDGK	[R].MSTSGLLEHHDGK.[L]	1xTMTpro [K13]; 1xTMTpro [N-Term]; 1xPhospho [S/T]	1xTMTpro [K13]; 1xTMTpro [N-Term]; 1xPhospho [S2(49.9); T3(49.9); S4(0.1)]	8.5988e-06	5.34993e-05	1	1	5	TGGT1_232080-t26_1-p1	TGGT1_232080-t26_1-p1 [5865-5877]			transcript=TGGT1_232080-t26_1 | gene=TGGT1_232080 | organism=Toxoplasma_gondii_GT1 | gene_product=Chorein_N domain-containing protein [Source:UniProtKB/TrEMBL;Acc:S7WJ08] | transcript_product=hypothetical protein | location=TGGT1_chrVIII:1804634-1839298(-) | protein_length=10329 | sequence_SO=chromosome | SO=protein_coding_gene | is_pseudo=false	0	2100.04	13	2.272	2.802	2.272	0.733	1.665	2.053	1.665	2.479	2.116	1.86	1.18	1.49	1.18	-0.45	0.74	1.04	0.74	1.31	1.08	0.89	0.190034	0.0543431	0.0370021	0.565864	0.159372	0.247569	0.446603	0.164679	0.31461	0.198026	0.900211
FALSE	High	MSTSGLLEHHDGK	[R].MSTSGLLEHHDGK.[L]	1xTMTpro [K13]; 1xTMTpro [N-Term]; 2xPhospho [T3(100); S4(100)]	1xTMTpro [K13]; 1xTMTpro [N-Term]; 2xPhospho [S2(0); T3(100); S4(100)]	1.21464e-05	5.34993e-05	1	1	4	TGGT1_232080-t26_1-p1	TGGT1_232080-t26_1-p1 [5865-5877]	TGGT1_232080-t26_1-p1 2xPhospho [S5866(0); T5867(100); S5868(100)]	TGGT1_232080-t26_1-p1 2xPhospho [T5867(100); S5868(100)]	transcript=TGGT1_232080-t26_1 | gene=TGGT1_232080 | organism=Toxoplasma_gondii_GT1 | gene_product=Chorein_N domain-containing protein [Source:UniProtKB/TrEMBL;Acc:S7WJ08] | transcript_product=hypothetical protein | location=TGGT1_chrVIII:1804634-1839298(-) | protein_length=10329 | sequence_SO=chromosome | SO=protein_coding_gene | is_pseudo=false	0	2180.01	13	1.413	1.736	1.033	0.962	1.36	1.67	0.993	1.579	1.656	1.015	0.5	0.8	0.05	-0.06	0.44	0.74	-0.01	0.66	0.73	0.02	0.469539	0.431961	0.77001	0.91231	0.0705741	0.197684	0.988512	0.293035	0.0624809	0.950152	0.919077
FALSE	High	MSVDEGPPPDGFTEETLPTPR	[R].MSVDEGPPPDGFTEETLPTPR.[E]	1xTMTpro [N-Term]; 1xPhospho [S2(100)]	1xTMTpro [N-Term]; 1xPhospho [S2(100); T13(0); T16(0); T19(0)]	1.01998e-09	5.34993e-05	1	1	2	TGGT1_214090-t26_1-p1	TGGT1_214090-t26_1-p1 [1386-1406]	TGGT1_214090-t26_1-p1 1xPhospho [S1387(100); T1398(0); T1401(0); T1404(0)]	TGGT1_214090-t26_1-p1 1xPhospho [S1387(100)]	transcript=TGGT1_214090-t26_1 | gene=TGGT1_214090 | organism=Toxoplasma_gondii_GT1 | gene_product=Signal peptidase [Source:UniProtKB/TrEMBL;Acc:S7W5I3] | transcript_product=signal peptidase | location=TGGT1_chrX:5908335-5920860(+) | protein_length=1859 | sequence_SO=chromosome | SO=protein_coding_gene | is_pseudo=false	0	2656.22	21
FALSE	High	MSVTFVGNSTAIQEMFK	[K].MSVTFVGNSTAIQEMFK.[R]	2xOxidation [M1; M15]; 1xTMTpro [K17]; 1xTMTpro [N-Term]	2xOxidation [M1; M15]; 1xTMTpro [K17]; 1xTMTpro [N-Term]	1.18995e-06	5.34993e-05	1	3	1	TGGT1_266960-t26_1-p1	TGGT1_266960-t26_1-p1 [363-379]			transcript=TGGT1_266960-t26_1 | gene=TGGT1_266960 | organism=Toxoplasma_gondii_GT1 | gene_product=Tubulin beta chain [Source:UniProtKB/TrEMBL;Acc:A0A125YWG4] | transcript_product=beta-tubulin | location=TGGT1_chrIX:705551-707606(-) | protein_length=449 | sequence_SO=chromosome | SO=protein_coding_gene | is_pseudo=false	0	2530.32	17
FALSE	High	MTGDAKTDEECSDADPTELR	[R].MTGDAKTDEECSDADPTELR.[Q]	1xMethylthio [C11]; 1xTMTpro [K6]; 1xTMTpro [N-Term]; 1xPhospho [T7(100)]	1xMethylthio [C11]; 1xTMTpro [K6]; 1xTMTpro [N-Term]; 1xPhospho [T2(0); T7(100); S12(0); T17(0)]	8.48114e-08	5.34993e-05	1	1	7	TGGT1_207720-t26_1-p1	TGGT1_207720-t26_1-p1 [111-130]	TGGT1_207720-t26_1-p1 1xMethylthio [C121]; 1xPhospho [T112(0); T117(100); S122(0); T127(0)]	TGGT1_207720-t26_1-p1 1xMethylthio [C121]; 1xPhospho [T117(100)]	transcript=TGGT1_207720-t26_1 | gene=TGGT1_207720 | organism=Toxoplasma_gondii_GT1 | gene_product=hypothetical protein | transcript_product=hypothetical protein | location=TGGT1_chrIb:247992-259807(+) | protein_length=1628 | sequence_SO=chromosome | SO=protein_coding_gene | is_pseudo=false	1	2918.28	20	0.913	0.931	0.839	0.998	0.911	0.929	0.837	0.85	0.949	0.893	-0.13	-0.1	-0.25	0	-0.13	-0.11	-0.26	-0.24	-0.08	-0.16	0.48064	0.648331	0.575513	0.992466	0.569903	0.545315	0.0752786	0.206863	0.110272	0.240353	0.919609
FALSE	High	MTGDAKTDEECSDADPTELR	[R].MTGDAKTDEECSDADPTELR.[Q]	1xOxidation [M1]; 1xMethylthio [C11]; 1xTMTpro [K6]; 1xTMTpro [N-Term]; 1xPhospho [T7(100)]	1xOxidation [M1]; 1xMethylthio [C11]; 1xTMTpro [K6]; 1xTMTpro [N-Term]; 1xPhospho [T2(0); T7(100); S12(0); T17(0)]	2.65162e-07	5.34993e-05	1	1	1	TGGT1_207720-t26_1-p1	TGGT1_207720-t26_1-p1 [111-130]	TGGT1_207720-t26_1-p1 1xMethylthio [C121]; 1xPhospho [T112(0); T117(100); S122(0); T127(0)]	TGGT1_207720-t26_1-p1 1xMethylthio [C121]; 1xPhospho [T117(100)]	transcript=TGGT1_207720-t26_1 | gene=TGGT1_207720 | organism=Toxoplasma_gondii_GT1 | gene_product=hypothetical protein | transcript_product=hypothetical protein | location=TGGT1_chrIb:247992-259807(+) | protein_length=1628 | sequence_SO=chromosome | SO=protein_coding_gene | is_pseudo=false	1	2934.27	20
FALSE	High	MTGDAKTDEECSDADPTELR	[R].MTGDAKTDEECSDADPTELR.[Q]	1xMethylthio [C11]; 1xTMTpro [K6]; 1xTMTpro [N-Term]; 2xPhospho [T7(100); S12(100)]	1xMethylthio [C11]; 1xTMTpro [K6]; 1xTMTpro [N-Term]; 2xPhospho [T2(0); T7(100); S12(100); T17(0)]	0.000242671	5.34993e-05	1	1	7	TGGT1_207720-t26_1-p1	TGGT1_207720-t26_1-p1 [111-130]	TGGT1_207720-t26_1-p1 1xMethylthio [C121]; 2xPhospho [T112(0); T117(100); S122(100); T127(0)]	TGGT1_207720-t26_1-p1 1xMethylthio [C121]; 2xPhospho [T117(100); S122(100)]	transcript=TGGT1_207720-t26_1 | gene=TGGT1_207720 | organism=Toxoplasma_gondii_GT1 | gene_product=hypothetical protein | transcript_product=hypothetical protein | location=TGGT1_chrIb:247992-259807(+) | protein_length=1628 | sequence_SO=chromosome | SO=protein_coding_gene | is_pseudo=false	1	2998.24	20	1.062	0.85	1.016	0.919	0.976	0.782	0.934	0.803	0.894	0.829	0.09	-0.23	0.02	-0.12	-0.04	-0.36	-0.1	-0.32	-0.16	-0.27	0.53964	0.135142	0.845793	0.497166	0.364659	0.12356	0.166898	0.0767288	0.164072	0.0808651	0.929498
FALSE	High	MTGDAKTDEECSDADPTELR	[R].MTGDAKTDEECSDADPTELR.[Q]	1xOxidation [M1]; 1xMethylthio [C11]; 1xTMTpro [K6]; 1xTMTpro [N-Term]; 2xPhospho [T7(99.4); S12(100)]	1xOxidation [M1]; 1xMethylthio [C11]; 1xTMTpro [K6]; 1xTMTpro [N-Term]; 2xPhospho [T2(0.6); T7(99.4); S12(100); T17(0)]	2.41351e-05	5.34993e-05	1	1	2	TGGT1_207720-t26_1-p1	TGGT1_207720-t26_1-p1 [111-130]	TGGT1_207720-t26_1-p1 1xMethylthio [C121]; 2xPhospho [T112(0.6); T117(99.4); S122(100); T127(0)]	TGGT1_207720-t26_1-p1 1xMethylthio [C121]; 2xPhospho [T117(99.4); S122(100)]	transcript=TGGT1_207720-t26_1 | gene=TGGT1_207720 | organism=Toxoplasma_gondii_GT1 | gene_product=hypothetical protein | transcript_product=hypothetical protein | location=TGGT1_chrIb:247992-259807(+) | protein_length=1628 | sequence_SO=chromosome | SO=protein_coding_gene | is_pseudo=false	1	3014.24	20
FALSE	High	MTHNSYEEWCIQK	[R].MTHNSYEEWCIQK.[E]	1xMethylthio [C10]; 1xTMTpro [K13]; 1xTMTpro [N-Term]; 1xPhospho [S5(100)]	1xMethylthio [C10]; 1xTMTpro [K13]; 1xTMTpro [N-Term]; 1xPhospho [T2(0); S5(100); Y6(0)]	3.57435e-05	5.34993e-05	1	1	1	TGGT1_275650-t26_1-p1	TGGT1_275650-t26_1-p1 [745-757]	TGGT1_275650-t26_1-p1 1xMethylthio [C754]; 1xPhospho [T746(0); S749(100); Y750(0)]	TGGT1_275650-t26_1-p1 1xMethylthio [C754]; 1xPhospho [S749(100)]	transcript=TGGT1_275650-t26_1 | gene=TGGT1_275650 | organism=Toxoplasma_gondii_GT1 | gene_product=hypothetical protein | transcript_product=hypothetical protein | location=TGGT1_chrIII:288290-290923(+) | protein_length=877 | sequence_SO=chromosome | SO=protein_coding_gene | is_pseudo=false	0	2403.08	13
FALSE	High	MTMRPQNSQGTGALELLEGDGAAAGLAHK	[R].MTMRPQNSQGTGALELLEGDGAAAGLAHK.[M]	1xTMTpro [K29]; 1xTMTpro [N-Term]; 1xPhospho [T2(99.4)]	1xTMTpro [K29]; 1xTMTpro [N-Term]; 1xPhospho [T2(99.4); S8(0.3); T11(0.3)]	4.13958e-15	5.34993e-05	1	1	1	TGGT1_228200-t26_1-p1	TGGT1_228200-t26_1-p1 [161-189]	TGGT1_228200-t26_1-p1 1xPhospho [T162(99.4); S168(0.3); T171(0.3)]	TGGT1_228200-t26_1-p1 1xPhospho [T162(99.4)]	transcript=TGGT1_228200-t26_1 | gene=TGGT1_228200 | organism=Toxoplasma_gondii_GT1 | gene_product=Vacuolar (H+)-atpase g subunit protein [Source:UniProtKB/TrEMBL;Acc:S7UWY3] | transcript_product=vacuolar (h+)-atpase g subunit protein | location=TGGT1_chrX:405994-408881(-) | protein_length=483 | sequence_SO=chromosome | SO=protein_coding_gene | is_pseudo=false	0	3612.82	29	1.503	1.265	0.96	1.203	1.808	1.521	1.155	2.238	1.373	1.659	0.59	0.34	-0.06	0.27	0.85	0.61	0.21	1.16	0.46	0.73	0.164384	0.18009	0.629151	0.127401	0.075064	0.0466105	0.107347	0.00341013	0.114384	0.0464135	0.895983
FALSE	High	MSSSSLSAEVPSLSAR	[R].MSSSSLSAEVPSLSAR.[E]	1xTMTpro [N-Term]; 1xPhospho [S]	1xTMTpro [N-Term]; 1xPhospho [S2(49.9); S3(49.9); S4(0.2); S5(0); S7(0); S12(0); S14(0)]	1.07519e-08	5.34993e-05	1	1	4	TGGT1_261480-t26_1-p1	TGGT1_261480-t26_1-p1 [505-520]			transcript=TGGT1_261480-t26_1 | gene=TGGT1_261480 | organism=Toxoplasma_gondii_GT1 | gene_product=Phosphatidyl serine synthase [Source:UniProtKB/TrEMBL;Acc:S7UXZ9] | transcript_product=phosphatidyl serine synthase | location=TGGT1_chrVIIb:1685826-1692167(-) | protein_length=540 | sequence_SO=chromosome | SO=protein_coding_gene | is_pseudo=false	0	1992.96	16	1.112	1.317	1.365	1.096	1.218	1.442	1.495	1.261	1.479	1.421	0.15	0.4	0.45	0.13	0.28	0.53	0.58	0.33	0.56	0.51	0.621135	0.274553	0.371482	0.312527	0.318236	0.133241	0.236327	0.0636264	0.141706	0.113885	0.943925
FALSE	High	NANNPYALHASEDPAGKESGAASPR	[R].NANNPYALHASEDPAGKESGAASPR.[A]	1xTMTpro [K17]; 1xTMTpro [N-Term]; 2xPhospho [S19(100); S23(100)]	1xTMTpro [K17]; 1xTMTpro [N-Term]; 2xPhospho [Y6(0); S11(0); S19(100); S23(100)]	1.51616e-06	5.34993e-05	1	1	1	TGGT1_264790-t26_1-p1	TGGT1_264790-t26_1-p1 [3979-4003]	TGGT1_264790-t26_1-p1 2xPhospho [Y3984(0); S3989(0); S3997(100); S4001(100)]	TGGT1_264790-t26_1-p1 2xPhospho [S3997(100); S4001(100)]	transcript=TGGT1_264790-t26_1 | gene=TGGT1_264790 | organism=Toxoplasma_gondii_GT1 | gene_product=hypothetical protein | transcript_product=hypothetical protein | location=TGGT1_chrIX:1831441-1848080(+) | protein_length=4473 | sequence_SO=chromosome | SO=protein_coding_gene | is_pseudo=false	1	3292.53	25
FALSE	High	NANQGQGPAPYGYPPQQR	[R].NANQGQGPAPYGYPPQQR.[M]	1xTMTpro [N-Term]	1xTMTpro [N-Term]	1.18399e-07	5.34993e-05	1	1	3	TGGT1_313010-t26_1-p1	TGGT1_313010-t26_1-p1 [28-45]			transcript=TGGT1_313010-t26_1 | gene=TGGT1_313010 | organism=Toxoplasma_gondii_GT1 | gene_product=DEAD (Asp-Glu-Ala-Asp) box polypeptide DDX6 [Source:UniProtKB/TrEMBL;Acc:S7W8B2] | transcript_product=DEAD (Asp-Glu-Ala-Asp) box polypeptide DDX6 | location=TGGT1_chrXI:2995385-2998767(-) | protein_length=475 | sequence_SO=chromosome | SO=protein_coding_gene | is_pseudo=false	0	2247.12	18	1.416	1.843	1.461	0.937	1.327	1.727	1.369	1.571	1.94	1.818	0.5	0.88	0.55	-0.09	0.41	0.79	0.45	0.65	0.96	0.86	0.305133	0.122756	0.384856	0.774229	0.012197	0.0647627	0.171247	0.0555356	0.0312141	0.00667092	0.904778
FALSE	High	NANQVQSPSER	[R].NANQVQSPSER.[T]	1xTMTpro [N-Term]; 1xPhospho [S7(99.7)]	1xTMTpro [N-Term]; 1xPhospho [S7(99.7); S9(0.3)]	0.00013456	5.34993e-05	1	1	1	TGGT1_238170-t26_1-p1	TGGT1_238170-t26_1-p1 [497-507]	TGGT1_238170-t26_1-p1 1xPhospho [S503(99.7); S505(0.3)]	TGGT1_238170-t26_1-p1 1xPhospho [S503(99.7)]	transcript=TGGT1_238170-t26_1 | gene=TGGT1_238170 | organism=Toxoplasma_gondii_GT1 | gene_product=hypothetical protein | transcript_product=hypothetical protein | location=TGGT1_chrVI:95675-101549(+) | protein_length=1557 | sequence_SO=chromosome | SO=protein_coding_gene | is_pseudo=false	0	1613.76	11
FALSE	High	NEDGTDASDDAEDEYEQDHTILGK	[K].NEDGTDASDDAEDEYEQDHTILGK.[L]	1xTMTpro [K24]; 1xTMTpro [N-Term]; 2xPhospho [T5(100); S8(100)]	1xTMTpro [K24]; 1xTMTpro [N-Term]; 2xPhospho [T5(100); S8(100); Y15(0); T20(0)]	1.92567e-09	5.34993e-05	1	1	4	TGGT1_227450-t26_1-p1	TGGT1_227450-t26_1-p1 [1978-2001]	TGGT1_227450-t26_1-p1 2xPhospho [T1982(100); S1985(100); Y1992(0); T1997(0)]	TGGT1_227450-t26_1-p1 2xPhospho [T1982(100); S1985(100)]	transcript=TGGT1_227450-t26_1 | gene=TGGT1_227450 | organism=Toxoplasma_gondii_GT1 | gene_product=Nudix hydrolase domain-containing protein [Source:UniProtKB/TrEMBL;Acc:S7UXE1] | transcript_product=hydrolase, NUDIX family protein | location=TGGT1_chrX:834070-841020(+) | protein_length=2063 | sequence_SO=chromosome | SO=protein_coding_gene | is_pseudo=false	0	3435.43	24	1.108	1.036	1.061	1.021	1.131	1.058	1.084	0.73	0.931	0.706	0.15	0.05	0.09	0.03	0.18	0.08	0.12	-0.45	-0.1	-0.5	0.27865	0.364897	0.842488	0.586228	0.349626	0.0542983	0.811086	0.303876	0.416707	0.23744	0.904439
FALSE	High	NEEDAGSGRDEALFEDDE	[R].NEEDAGSGRDEALFEDDE.[-]	1xTMTpro [N-Term]; 1xPhospho [S7(100)]	1xTMTpro [N-Term]; 1xPhospho [S7(100)]	1.47459e-06	5.34993e-05	1	1	3	TGGT1_297730-t26_1-p1	TGGT1_297730-t26_1-p1 [209-226]	TGGT1_297730-t26_1-p1 1xPhospho [S215(100)]	TGGT1_297730-t26_1-p1 1xPhospho [S215(100)]	transcript=TGGT1_297730-t26_1 | gene=TGGT1_297730 | organism=Toxoplasma_gondii_GT1 | gene_product=Transcription elongation factor 1 homolog [Source:UniProtKB/TrEMBL;Acc:A0A125YVV4] | transcript_product=putative transcription elongation factor 1 | location=TGGT1_chrII:1935013-1936221(-) | protein_length=226 | sequence_SO=chromosome | SO=protein_coding_gene | is_pseudo=false	1	2381.96	18	0.864	0.97	0.816	1.281	1.107	1.242	1.046	1.102	1.089	1.017	-0.21	-0.04	-0.29	0.36	0.15	0.31	0.06	0.14	0.12	0.02	0.724036	0.940006	0.0358869	0.626894	0.325209	0.131994	0.925989	0.839291	0.340916	0.790687	0.959516
FALSE	High	NEEDEGHSNSSPR	[K].NEEDEGHSNSSPR.[H]	1xTMTpro [N-Term]; 1xPhospho [S]	1xTMTpro [N-Term]; 1xPhospho [S8(0); S10(50); S11(50)]	2.66485e-06	5.34993e-05	1	1	1	Q14103	Q14103 [73-85]			Heterogeneous nuclear ribonucleoprotein D0 OS=Homo sapiens (Human) OX=9606 GN=HNRNPD PE=1 SV=1	0	1841.76	13	0.748	0.988	0.712	1.281	0.959	1.266	0.912	1.232	1.215	1.023	-0.42	-0.02	-0.49	0.36	-0.06	0.34	-0.13	0.3	0.28	0.03	0.215542	0.949212	0.56424	0.122215	0.825701	0.443766	0.874861	0.0713946	0.266382	0.799553	0.900211
FALSE	High	NEEEEEDEGEDDEEGEMEDKEETPK	[R].NEEEEEDEGEDDEEGEMEDKEETPK.[S]	2xTMTpro [K20; K25]; 1xTMTpro [N-Term]; 1xPhospho [T23(100)]	2xTMTpro [K20; K25]; 1xTMTpro [N-Term]; 1xPhospho [T23(100)]	1.3166e-08	5.34993e-05	1	1	1	TGGT1_244700-t26_1-p1	TGGT1_244700-t26_1-p1 [131-155]	TGGT1_244700-t26_1-p1 1xPhospho [T153(100)]	TGGT1_244700-t26_1-p1 1xPhospho [T153(100)]	transcript=TGGT1_244700-t26_1 | gene=TGGT1_244700 | organism=Toxoplasma_gondii_GT1 | gene_product=NAD(+)/NADH kinase domain-containing protein [Source:UniProtKB/TrEMBL;Acc:S7W7F5] | transcript_product=NAD(+)/NADH kinase domain-containing protein | location=TGGT1_chrVI:3371487-3383046(+) | protein_length=2109 | sequence_SO=chromosome | SO=protein_coding_gene | is_pseudo=false	1	3962.68	25
FALSE	High	NEEENSGSPPPSSDADDPSSAAGADGQR	[R].NEEENSGSPPPSSDADDPSSAAGADGQR.[S]	1xTMTpro [N-Term]	1xTMTpro [N-Term]	6.30512e-16	5.34993e-05	1	1	12	TGGT1_264610-t26_1-p1	TGGT1_264610-t26_1-p1 [83-110]			transcript=TGGT1_264610-t26_1 | gene=TGGT1_264610 | organism=Toxoplasma_gondii_GT1 | gene_product=RNA recognition motif-containing protein [Source:UniProtKB/TrEMBL;Acc:A0A125YIU3] | transcript_product=RNA recognition motif-containing protein | location=TGGT1_chrIX:1992388-1998489(-) | protein_length=430 | sequence_SO=chromosome | SO=protein_coding_gene | is_pseudo=false	0	3048.32	28	0.901	0.942	0.897	1.192	1.073	1.122	1.069	1.016	1.068	1.056	-0.15	-0.09	-0.16	0.25	0.1	0.17	0.1	0.02	0.1	0.08	0.356566	0.588306	0.672298	0.449122	0.553625	0.347077	0.357167	0.840742	0.157932	0.305291	0.90924
FALSE	High	NEEENSGSPPPSSDADDPSSAAGADGQR	[R].NEEENSGSPPPSSDADDPSSAAGADGQR.[S]	1xTMTpro [N-Term]; 1xPhospho [S8(99.6)]	1xTMTpro [N-Term]; 1xPhospho [S6(0.4); S8(99.6); S12(0); S13(0); S19(0); S20(0)]	3.93057e-14	5.34993e-05	1	1	8	TGGT1_264610-t26_1-p1	TGGT1_264610-t26_1-p1 [83-110]	TGGT1_264610-t26_1-p1 1xPhospho [S88(0.4); S90(99.6); S94(0); S95(0); S101(0); S102(0)]	TGGT1_264610-t26_1-p1 1xPhospho [S90(99.6)]	transcript=TGGT1_264610-t26_1 | gene=TGGT1_264610 | organism=Toxoplasma_gondii_GT1 | gene_product=RNA recognition motif-containing protein [Source:UniProtKB/TrEMBL;Acc:A0A125YIU3] | transcript_product=RNA recognition motif-containing protein | location=TGGT1_chrIX:1992388-1998489(-) | protein_length=430 | sequence_SO=chromosome | SO=protein_coding_gene | is_pseudo=false	0	3128.29	28
FALSE	High	NEEENSGSPPPSSDADDPSSAAGADGQRSPPQEPDKELQMR	[R].NEEENSGSPPPSSDADDPSSAAGADGQRSPPQEPDKELQMR.[K]	1xTMTpro [K36]; 1xTMTpro [N-Term]; 1xPhospho [S]	1xTMTpro [K36]; 1xTMTpro [N-Term]; 1xPhospho [S6(0); S8(0); S12(0); S13(0); S19(49.9); S20(49.9); S29(0.3)]	2.72346e-08	5.34993e-05	1	1	3	TGGT1_264610-t26_1-p1	TGGT1_264610-t26_1-p1 [83-123]			transcript=TGGT1_264610-t26_1 | gene=TGGT1_264610 | organism=Toxoplasma_gondii_GT1 | gene_product=RNA recognition motif-containing protein [Source:UniProtKB/TrEMBL;Acc:A0A125YIU3] | transcript_product=RNA recognition motif-containing protein | location=TGGT1_chrIX:1992388-1998489(-) | protein_length=430 | sequence_SO=chromosome | SO=protein_coding_gene | is_pseudo=false	2	4968.24	41
FALSE	High	NEEENSGSPPPSSDADDPSSAAGADGQRSPPQEPDKELQMR	[R].NEEENSGSPPPSSDADDPSSAAGADGQRSPPQEPDKELQMR.[K]	1xOxidation [M40]; 1xTMTpro [K36]; 1xTMTpro [N-Term]; 1xPhospho [S]	1xOxidation [M40]; 1xTMTpro [K36]; 1xTMTpro [N-Term]; 1xPhospho [S6(0.2); S8(0); S12(0); S13(0); S19(33.3); S20(33.3); S29(33.3)]	5.23449e-06	5.34993e-05	1	1	1	TGGT1_264610-t26_1-p1	TGGT1_264610-t26_1-p1 [83-123]			transcript=TGGT1_264610-t26_1 | gene=TGGT1_264610 | organism=Toxoplasma_gondii_GT1 | gene_product=RNA recognition motif-containing protein [Source:UniProtKB/TrEMBL;Acc:A0A125YIU3] | transcript_product=RNA recognition motif-containing protein | location=TGGT1_chrIX:1992388-1998489(-) | protein_length=430 | sequence_SO=chromosome | SO=protein_coding_gene | is_pseudo=false	2	4984.23	41
FALSE	High	NEEESQDGCLHGGAAPR	[R].NEEESQDGCLHGGAAPR.[R]	1xMethylthio [C9]; 1xTMTpro [N-Term]; 1xPhospho [S5(100)]	1xMethylthio [C9]; 1xTMTpro [N-Term]; 1xPhospho [S5(100)]	1.10193e-11	5.34993e-05	1	1	7	TGGT1_223880-t26_1-p1	TGGT1_223880-t26_1-p1 [3490-3506]	TGGT1_223880-t26_1-p1 1xMethylthio [C3498]; 1xPhospho [S3494(100)]	TGGT1_223880-t26_1-p1 1xMethylthio [C3498]; 1xPhospho [S3494(100)]	transcript=TGGT1_223880-t26_1 | gene=TGGT1_223880 | organism=Toxoplasma_gondii_GT1 | gene_product=RING-type domain-containing protein [Source:UniProtKB/TrEMBL;Acc:S7UVV4] | transcript_product=zinc finger, C3HC4 type (RING finger) domain-containing protein | location=TGGT1_chrX:3392353-3413350(-) | protein_length=3893 | sequence_SO=chromosome | SO=protein_coding_gene | is_pseudo=false	0	2199.91	17	0.972	0.999	0.906	1.064	1.034	1.063	0.964	1.048	0.996	0.955	-0.04	0	-0.14	0.09	0.05	0.09	-0.05	0.07	-0.01	-0.07	0.748647	0.995268	0.598575	0.784786	0.808454	0.231705	0.538122	0.249662	0.956132	0.588749	0.962682
FALSE	High	NEEETHAKEDGNESPTASASALAGASR	[K].NEEETHAKEDGNESPTASASALAGASR.[S]	1xTMTpro [K8]; 1xTMTpro [N-Term]; 1xPhospho [S14(100)]	1xTMTpro [K8]; 1xTMTpro [N-Term]; 1xPhospho [T5(0); S14(100); T16(0); S18(0); S20(0); S26(0)]	1.70235e-14	5.34993e-05	1	1	5	TGGT1_205240-t26_1-p1	TGGT1_205240-t26_1-p1 [744-770]	TGGT1_205240-t26_1-p1 1xPhospho [T748(0); S757(100); T759(0); S761(0); S763(0); S769(0)]	TGGT1_205240-t26_1-p1 1xPhospho [S757(100)]	transcript=TGGT1_205240-t26_1 | gene=TGGT1_205240 | organism=Toxoplasma_gondii_GT1 | gene_product=Cleft lip and palate transmembrane protein 1 (Clptm1) protein [Source:UniProtKB/TrEMBL;Acc:S7W9T1] | transcript_product=cleft lip and palate transmembrane protein 1 (clptm1) protein | location=TGGT1_chrVIIa:1429206-1438379(-) | protein_length=794 | sequence_SO=chromosome | SO=protein_coding_gene | is…	1	3417.61	27	0.58	0.938	0.756	1.039	0.602	0.975	0.786	0.623	0.856	0.869	-0.79	-0.09	-0.4	0.06	-0.73	-0.04	-0.35	-0.68	-0.22	-0.2	0.353734	0.626904	0.0162941	0.956617	0.261105	0.964664	0.737808	0.602718	0.808724	0.859029	0.90924
FALSE	High	NEEGEADEPEEK	[K].NEEGEADEPEEK.[E]	1xTMTpro [K12]; 1xTMTpro [N-Term]	1xTMTpro [K12]; 1xTMTpro [N-Term]	1.00789e-05	5.34993e-05	1	1	2	TGGT1_244560-t26_1-p1	TGGT1_244560-t26_1-p1 [833-844]			transcript=TGGT1_244560-t26_1 | gene=TGGT1_244560 | organism=Toxoplasma_gondii_GT1 | gene_product=HATPase_c domain-containing protein [Source:UniProtKB/TrEMBL;Acc:S7VTT7] | transcript_product=putative heat shock protein 90 | location=TGGT1_chrVI:3273039-3276701(+) | protein_length=853 | sequence_SO=chromosome | SO=protein_coding_gene | is_pseudo=false	0	1983.96	12	1.086	1.122	0.998	1.02	1.108	1.145	1.018	1.018	1.056	0.892	0.12	0.17	0	0.03	0.15	0.19	0.03	0.03	0.08	-0.16	0.5205	0.431405	0.988155	0.902655	0.252866	0.17556	0.564236	0.940716	0.575648	0.252842	0.925814
FALSE	High	NEEPSEEEIDAPKPK	[K].NEEPSEEEIDAPKPK.[K]	2xTMTpro [K13; K15]; 1xTMTpro [N-Term]; 1xPhospho [S5(100)]	2xTMTpro [K13; K15]; 1xTMTpro [N-Term]; 1xPhospho [S5(100)]	3.85404e-05	5.34993e-05	1	1	3	Q9NR30	Q9NR30 [117-131]	Q9NR30 1xPhospho [S121(100)]	Q9NR30 1xPhospho [S121(100)]	Nucleolar RNA helicase 2 OS=Homo sapiens (Human) OX=9606 GN=DDX21 PE=1 SV=5	0	2704.39	15	1.046	0.75	0.873	0.899	0.941	0.674	0.785	0.805	0.902	0.871	0.07	-0.42	-0.2	-0.15	-0.09	-0.57	-0.35	-0.31	-0.15	-0.2	0.897756	0.324434	0.172182	0.259465	0.837209	0.180573	0.0216803	0.140702	0.0709294	0.0889649	0.986237
FALSE	High	NEDDFESDSRDGYADFLASPAAGR	[R].NEDDFESDSRDGYADFLASPAAGR.[R]	1xTMTpro [N-Term]; 1xPhospho [S9(99.6)]	1xTMTpro [N-Term]; 1xPhospho [S7(0.4); S9(99.6); Y13(0); S19(0)]	0.000112667	5.34993e-05	1	1	3	TGGT1_295760-t26_1-p1	TGGT1_295760-t26_1-p1 [510-533]	TGGT1_295760-t26_1-p1 1xPhospho [S516(0.4); S518(99.6); Y522(0); S528(0)]	TGGT1_295760-t26_1-p1 1xPhospho [S518(99.6)]	transcript=TGGT1_295760-t26_1 | gene=TGGT1_295760 | organism=Toxoplasma_gondii_GT1 | gene_product=Calcium-dependent protein kinase CDPK4A [Source:UniProtKB/TrEMBL;Acc:S7UJ03] | transcript_product=calcium-dependent protein kinase CDPK4A | location=TGGT1_chrIa:1506344-1521114(-) | protein_length=543 | sequence_SO=chromosome | SO=protein_coding_gene | is_pseudo=false	1	2989.28	24
FALSE	High	NEEPVRSPER	[K].NEEPVRSPER.[R]	1xTMTpro [N-Term]; 1xPhospho [S7(100)]	1xTMTpro [N-Term]; 1xPhospho [S7(100)]	1.12193e-05	5.34993e-05	1	1	1	Q92922	Q92922 [304-313]	Q92922 1xPhospho [S310(100)]	Q92922 1xPhospho [S310(100)]	SWI/SNF complex subunit SMARCC1 OS=Homo sapiens (Human) OX=9606 GN=SMARCC1 PE=1 SV=3	1	1596.77	10	0.921	0.915	0.874	1.331	1.227	1.218	1.163	1.008	1.309	1.15	-0.12	-0.13	-0.19	0.41	0.29	0.28	0.22	0.01	0.39	0.2	0.250203	0.0863713	0.599388	0.356931	0.514223	0.491693	0.0241957	0.901667	0.145358	0.0227536	0.900211
FALSE	High	NEESGHEEQK	[R].NEESGHEEQK.[V]	1xTMTpro [K10]; 1xTMTpro [N-Term]; 1xPhospho [S4(100)]	1xTMTpro [K10]; 1xTMTpro [N-Term]; 1xPhospho [S4(100)]	0.00010167	5.34993e-05	1	1	1	TGGT1_212110-t26_1-p1	TGGT1_212110-t26_1-p1 [539-548]	TGGT1_212110-t26_1-p1 1xPhospho [S542(100)]	TGGT1_212110-t26_1-p1 1xPhospho [S542(100)]	transcript=TGGT1_212110-t26_1 | gene=TGGT1_212110 | organism=Toxoplasma_gondii_GT1 | gene_product=JmjC domain-containing protein [Source:UniProtKB/TrEMBL;Acc:S7WBN6] | transcript_product=histone lysine demethylase JMJD5 | location=TGGT1_chrX:3961256-3966542(-) | protein_length=1085 | sequence_SO=chromosome | SO=protein_coding_gene | is_pseudo=false	0	1874.88	10	0.85	0.798	0.727	1.12	0.953	0.894	0.814	0.998	0.856	0.926	-0.23	-0.33	-0.46	0.16	-0.07	-0.16	-0.3	0	-0.22	-0.11	0.660056	0.133961	0.116491	0.0438826	0.891794	0.219939	0.155415	0.964382	0.456758	0.0135625	0.949954
FALSE	High	NEGEETKESSDRR	[K].NEGEETKESSDRR.[E]	1xTMTpro [K7]; 1xTMTpro [N-Term]; 2xPhospho [S9(100); S10(100)]	1xTMTpro [K7]; 1xTMTpro [N-Term]; 2xPhospho [T6(0); S9(100); S10(100)]	2.69679e-06	5.34993e-05	1	1	3	TGGT1_221390-t26_1-p1	TGGT1_221390-t26_1-p1 [44-56]	TGGT1_221390-t26_1-p1 2xPhospho [T49(0); S52(100); S53(100)]	TGGT1_221390-t26_1-p1 2xPhospho [S52(100); S53(100)]	transcript=TGGT1_221390-t26_1 | gene=TGGT1_221390 | organism=Toxoplasma_gondii_GT1 | gene_product=hypothetical protein | transcript_product=hypothetical protein | location=TGGT1_chrII:286177-292066(-) | protein_length=875 | sequence_SO=chromosome | SO=protein_coding_gene | is_pseudo=false	2	2305.04	13	1.079	0.99	0.998	1.042	1.124	1.032	1.04	1.043	1.003	1.039	0.11	-0.01	0	0.06	0.17	0.05	0.06	0.06	0	0.05	0.367275	0.872291	0.986673	0.776756	0.317285	0.708035	0.319599	0.4732	0.404612	0.797983	0.90924
FALSE	High	NEGSHAVASDDFPVSQAGAAQPR	[R].NEGSHAVASDDFPVSQAGAAQPR.[R]	1xTMTpro [N-Term]; 1xPhospho [S9(100)]	1xTMTpro [N-Term]; 1xPhospho [S4(0); S9(100); S15(0)]	1.51899e-08	5.34993e-05	1	1	1	TGGT1_254370-t26_1-p1	TGGT1_254370-t26_1-p1 [3306-3328]	TGGT1_254370-t26_1-p1 1xPhospho [S3309(0); S3314(100); S3320(0)]	TGGT1_254370-t26_1-p1 1xPhospho [S3314(100)]	transcript=TGGT1_254370-t26_1 | gene=TGGT1_254370 | organism=Toxoplasma_gondii_GT1 | gene_product=Guanylyl cyclase [Source:UniProtKB/TrEMBL;Acc:S7VVK4] | transcript_product=guanylyl cyclase | location=TGGT1_chrIII:1634182-1672467(+) | protein_length=4367 | sequence_SO=chromosome | SO=protein_coding_gene | is_pseudo=false	0	2695.24	23
FALSE	High	NEHGGPSFLR	[R].NEHGGPSFLR.[R]	1xTMTpro [N-Term]; 1xPhospho [S7(100)]	1xTMTpro [N-Term]; 1xPhospho [S7(100)]	0.000162575	5.34993e-05	1	1	3	TGGT1_304760-t26_1-p1	TGGT1_304760-t26_1-p1 [1021-1030]	TGGT1_304760-t26_1-p1 1xPhospho [S1027(100)]	TGGT1_304760-t26_1-p1 1xPhospho [S1027(100)]	transcript=TGGT1_304760-t26_1 | gene=TGGT1_304760 | organism=Toxoplasma_gondii_GT1 | gene_product=RNA recognition motif-containing protein [Source:UniProtKB/TrEMBL;Acc:S7W2V6] | transcript_product=RNA recognition motif-containing protein | location=TGGT1_chrVIIa:667907-675253(+) | protein_length=1335 | sequence_SO=chromosome | SO=protein_coding_gene | is_pseudo=false	0	1497.72	10
FALSE	High	NEKDVMMEEESDEDSDDEEK	[K].NEKDVMMEEESDEDSDDEEK.[S]	2xTMTpro [K3; K20]; 1xTMTpro [N-Term]; 2xPhospho [S11(100); S15(100)]	2xTMTpro [K3; K20]; 1xTMTpro [N-Term]; 2xPhospho [S11(100); S15(100)]	3.67495e-05	5.34993e-05	1	1	5	TGGT1_291930-t26_1-p1	TGGT1_291930-t26_1-p1 [379-398]	TGGT1_291930-t26_1-p1 2xPhospho [S389(100); S393(100)]	TGGT1_291930-t26_1-p1 2xPhospho [S389(100); S393(100)]	transcript=TGGT1_291930-t26_1 | gene=TGGT1_291930 | organism=Toxoplasma_gondii_GT1 | gene_product=RNA recognition motif-containing protein [Source:UniProtKB/TrEMBL;Acc:S7W432] | transcript_product=RNA recognition motif-containing protein | location=TGGT1_chrIX:4212023-4217780(+) | protein_length=705 | sequence_SO=chromosome | SO=protein_coding_gene | is_pseudo=false	1	3475.45	20
FALSE	High	NEKEETDNEELPSK	[R].NEKEETDNEELPSK.[K]	2xTMTpro [K3; K14]; 1xTMTpro [N-Term]; 1xPhospho [T6(100)]	2xTMTpro [K3; K14]; 1xTMTpro [N-Term]; 1xPhospho [T6(100); S13(0)]	8.09496e-07	5.34993e-05	1	1	7	TGGT1_293510-t26_1-p1	TGGT1_293510-t26_1-p1 [200-213]	TGGT1_293510-t26_1-p1 1xPhospho [T205(100); S212(0)]	TGGT1_293510-t26_1-p1 1xPhospho [T205(100)]	transcript=TGGT1_293510-t26_1 | gene=TGGT1_293510 | organism=Toxoplasma_gondii_GT1 | gene_product=Poly(ADP-ribose) polymerase and DNA-Ligase Zn-finger region domain-containing protein [Source:UniProtKB/TrEMBL;Acc:S7UHM3] | transcript_product=poly(ADP-ribose) polymerase and DNA-Ligase Zn-finger region domain-containing protein | location=TGGT1_chrIa:371571-373049(-) | protein_length=392 | sequence…	1	2654.34	14	0.992	0.905	0.95	0.983	0.975	0.89	0.934	0.889	0.943	0.882	-0.01	-0.14	-0.07	-0.02	-0.04	-0.17	-0.1	-0.17	-0.08	-0.18	0.925216	0.00594324	0.300799	0.875707	0.358929	0.40408	0.458788	0.371622	0.598167	0.554223	0.990265
FALSE	High	NEKEETDNEELPSKK	[R].NEKEETDNEELPSKK.[K]	3xTMTpro [K3; K14; K15]; 1xTMTpro [N-Term]; 1xPhospho [T6(100)]	3xTMTpro [K3; K14; K15]; 1xTMTpro [N-Term]; 1xPhospho [T6(100); S13(0)]	0.00019405	5.34993e-05	1	1	1	TGGT1_293510-t26_1-p1	TGGT1_293510-t26_1-p1 [200-214]	TGGT1_293510-t26_1-p1 1xPhospho [T205(100); S212(0)]	TGGT1_293510-t26_1-p1 1xPhospho [T205(100)]	transcript=TGGT1_293510-t26_1 | gene=TGGT1_293510 | organism=Toxoplasma_gondii_GT1 | gene_product=Poly(ADP-ribose) polymerase and DNA-Ligase Zn-finger region domain-containing protein [Source:UniProtKB/TrEMBL;Acc:S7UHM3] | transcript_product=poly(ADP-ribose) polymerase and DNA-Ligase Zn-finger region domain-containing protein | location=TGGT1_chrIa:371571-373049(-) | protein_length=392 | sequence…	2	3086.64	15	1.069	0.939	0.996	0.926	0.989	0.869	0.922	1.094	0.625	1.018	0.1	-0.09	-0.01	-0.11	-0.02	-0.2	-0.12	0.13	-0.68	0.03	0.597549	0.300373	0.97936	0.0795534	0.917373	0.100485	0.611919	0.354561	0.284742	0.874813	0.9387
FALSE	High	NELLSISLDEVLEGAGETK	[R].NELLSISLDEVLEGAGETK.[E]	1xTMTpro [K19]; 1xTMTpro [N-Term]; 1xPhospho [S5(99.7)]	1xTMTpro [K19]; 1xTMTpro [N-Term]; 1xPhospho [S5(99.7); S7(0.3); T18(0)]	3.34183e-06	5.34993e-05	1	1	1	TGGT1_235020-t26_1-p1	TGGT1_235020-t26_1-p1 [929-947]	TGGT1_235020-t26_1-p1 1xPhospho [S933(99.7); S935(0.3); T946(0)]	TGGT1_235020-t26_1-p1 1xPhospho [S933(99.7)]	transcript=TGGT1_235020-t26_1 | gene=TGGT1_235020 | organism=Toxoplasma_gondii_GT1 | gene_product=WD_REPEATS_REGION domain-containing protein [Source:UniProtKB/TrEMBL;Acc:S7UVW7] | transcript_product=putative COPI protein | location=TGGT1_chrX:4501792-4518157(-) | protein_length=1256 | sequence_SO=chromosome | SO=protein_coding_gene | is_pseudo=false	0	2705.41	19	0.968	0.89	1.045	1.32	1.278	1.175	1.379	1.165	1.199	1.08	-0.05	-0.17	0.06	0.4	0.35	0.23	0.46	0.22	0.26	0.11	0.734732	0.371554	0.763164	0.526783	0.477051	0.604842	0.340494	0.355311	0.524009	0.736992	0.96044
FALSE	High	NENSGNLGVLASTNQSGGGYGK	[R].NENSGNLGVLASTNQSGGGYGK.[N]	1xTMTpro [K22]; 1xTMTpro [N-Term]	1xTMTpro [K22]; 1xTMTpro [N-Term]	3.41173e-09	5.34993e-05	1	1	2	TGGT1_230940-t26_1-p1	TGGT1_230940-t26_1-p1 [1419-1440]			transcript=TGGT1_230940-t26_1 | gene=TGGT1_230940 | organism=Toxoplasma_gondii_GT1 | gene_product=hypothetical protein | transcript_product=hypothetical protein | location=TGGT1_chrVIII:1112065-1119747(+) | protein_length=1523 | sequence_SO=chromosome | SO=protein_coding_gene | is_pseudo=false	0	2732.41	22
FALSE	High	NEQAAFVTDKPSDSPR	[K].NEQAAFVTDKPSDSPR.[N]	1xTMTpro [K10]; 1xTMTpro [N-Term]; 1xPhospho [S14(99.7)]	1xTMTpro [K10]; 1xTMTpro [N-Term]; 1xPhospho [T8(0); S12(0.3); S14(99.7)]	1.50372e-10	5.34993e-05	1	1	6	TGGT1_240250-t26_1-p1	TGGT1_240250-t26_1-p1 [696-711]	TGGT1_240250-t26_1-p1 1xPhospho [T703(0); S707(0.3); S709(99.7)]	TGGT1_240250-t26_1-p1 1xPhospho [S709(99.7)]	transcript=TGGT1_240250-t26_1 | gene=TGGT1_240250 | organism=Toxoplasma_gondii_GT1 | gene_product=Macro domain-containing protein [Source:UniProtKB/TrEMBL;Acc:S7W065] | transcript_product=macro domain-containing protein | location=TGGT1_chrVI:1105085-1109716(+) | protein_length=817 | sequence_SO=chromosome | SO=protein_coding_gene | is_pseudo=false	0	2450.22	16	0.895	0.84	0.847	1.171	1.048	0.984	0.992	0.955	1.005	0.995	-0.16	-0.25	-0.24	0.23	0.07	-0.02	-0.01	-0.07	0.01	-0.01	0.320592	0.118608	0.263053	0.0682104	0.655322	0.489884	0.94522	0.641005	0.97139	0.971108	0.9065
FALSE	High	NEQVDPDVLSLDGADGTLVPER	[K].NEQVDPDVLSLDGADGTLVPER.[E]	1xTMTpro [N-Term]; 1xPhospho [S10(100)]	1xTMTpro [N-Term]; 1xPhospho [S10(100); T17(0)]	1.48591e-10	5.34993e-05	1	1	2	TGGT1_242570-t26_1-p1	TGGT1_242570-t26_1-p1 [67-88]	TGGT1_242570-t26_1-p1 1xPhospho [S76(100); T83(0)]	TGGT1_242570-t26_1-p1 1xPhospho [S76(100)]	transcript=TGGT1_242570-t26_1 | gene=TGGT1_242570 | organism=Toxoplasma_gondii_GT1 | gene_product=hypothetical protein | transcript_product=hypothetical protein | location=TGGT1_chrVI:1981264-1985802(-) | protein_length=884 | sequence_SO=chromosome | SO=protein_coding_gene | is_pseudo=false	0	2723.31	22
FALSE	High	NERGEESDGEGAVGPAASK	[R].NERGEESDGEGAVGPAASK.[K]	1xTMTpro [K19]; 1xTMTpro [N-Term]; 1xPhospho [S7(100)]	1xTMTpro [K19]; 1xTMTpro [N-Term]; 1xPhospho [S7(100); S18(0)]	6.30512e-16	5.34993e-05	1	1	11	TGGT1_250330-t26_1-p1	TGGT1_250330-t26_1-p1 [213-231]	TGGT1_250330-t26_1-p1 1xPhospho [S219(100); S230(0)]	TGGT1_250330-t26_1-p1 1xPhospho [S219(100)]	transcript=TGGT1_250330-t26_1 | gene=TGGT1_250330 | organism=Toxoplasma_gondii_GT1 | gene_product=hypothetical protein | transcript_product=hypothetical protein | location=TGGT1_chrXII:4987032-4990337(-) | protein_length=413 | sequence_SO=chromosome | SO=protein_coding_gene | is_pseudo=false	1	2548.22	19	0.962	0.835	0.81	0.921	0.886	0.769	0.746	0.732	0.75	0.923	-0.06	-0.26	-0.3	-0.12	-0.18	-0.38	-0.42	-0.45	-0.41	-0.12	0.906438	0.197493	0.116725	0.828757	0.864536	0.596119	0.461616	0.542032	0.594355	0.795481	0.988435
FALSE	High	NEESDGAAGASDEHLQNS	[K].NEESDGAAGASDEHLQNS.[-]	1xTMTpro [N-Term]; 1xPhospho [S4(100)]	1xTMTpro [N-Term]; 1xPhospho [S4(100); S11(0); S18(0)]	3.91633e-10	5.34993e-05	1	1	3	TGGT1_266090-t26_1-p1	TGGT1_266090-t26_1-p1 [434-451]	TGGT1_266090-t26_1-p1 1xPhospho [S437(100); S444(0); S451(0)]	TGGT1_266090-t26_1-p1 1xPhospho [S437(100)]	transcript=TGGT1_266090-t26_1 | gene=TGGT1_266090 | organism=Toxoplasma_gondii_GT1 | gene_product=hypothetical protein | transcript_product=hypothetical protein | location=TGGT1_chrIX:1131085-1134168(-) | protein_length=451 | sequence_SO=chromosome | SO=protein_coding_gene | is_pseudo=false	0	2214.91	18
FALSE	High	NEAHQLSVDALRPPTAMTNAVSWR	[K].NEAHQLSVDALRPPTAMTNAVSWR.[S]	1xOxidation [M17]; 1xTMTpro [N-Term]; 1xPhospho [T/S]	1xOxidation [M17]; 1xTMTpro [N-Term]; 1xPhospho [S7(0); T15(50); T18(50); S22(0)]	2.21287e-09	5.34993e-05	1	1	7	TGGT1_289770-t26_1-p1	TGGT1_289770-t26_1-p1 [139-162]			transcript=TGGT1_289770-t26_1 | gene=TGGT1_289770 | organism=Toxoplasma_gondii_GT1 | gene_product=MHD domain-containing protein [Source:UniProtKB/TrEMBL;Acc:A0A125YND3] | transcript_product=mu1 adaptin | location=TGGT1_chrIX:3244934-3246226(+) | protein_length=430 | sequence_SO=chromosome | SO=protein_coding_gene | is_pseudo=false	0	3064.5	24
FALSE	High	NEAHQLSVDALRPPTAMTNAVSWR	[K].NEAHQLSVDALRPPTAMTNAVSWR.[S]	1xTMTpro [N-Term]; 1xPhospho [T/S]	1xTMTpro [N-Term]; 1xPhospho [S7(0); T15(50); T18(50); S22(0)]	3.16607e-12	5.34993e-05	1	1	4	TGGT1_289770-t26_1-p1	TGGT1_289770-t26_1-p1 [139-162]			transcript=TGGT1_289770-t26_1 | gene=TGGT1_289770 | organism=Toxoplasma_gondii_GT1 | gene_product=MHD domain-containing protein [Source:UniProtKB/TrEMBL;Acc:A0A125YND3] | transcript_product=mu1 adaptin | location=TGGT1_chrIX:3244934-3246226(+) | protein_length=430 | sequence_SO=chromosome | SO=protein_coding_gene | is_pseudo=false	0	3048.5	24	0.972	1.004	1.166	0.998	0.97	1.001	1.163	1.231	0.855	1.153	-0.04	0.01	0.22	0	-0.04	0	0.22	0.3	-0.23	0.2	0.85063	0.98922	0.365594	0.995727	0.916754	0.992381	0.656921	0.455869	0.453386	0.617833	0.978993
FALSE	High	NEADASAMDVDSEEKSEGR	[K].NEADASAMDVDSEEKSEGR.[S]	1xTMTpro [K15]; 1xTMTpro [N-Term]; 1xPhospho [S12(100)]	1xTMTpro [K15]; 1xTMTpro [N-Term]; 1xPhospho [S6(0); S12(100); S16(0)]	3.46343e-06	5.34993e-05	1	1	2	TGGT1_263060-t26_1-p1	TGGT1_263060-t26_1-p1 [866-884]	TGGT1_263060-t26_1-p1 1xPhospho [S871(0); S877(100); S881(0)]	TGGT1_263060-t26_1-p1 1xPhospho [S877(100)]	transcript=TGGT1_263060-t26_1 | gene=TGGT1_263060 | organism=Toxoplasma_gondii_GT1 | gene_product=RPN2_C domain-containing protein [Source:UniProtKB/TrEMBL;Acc:S7UY70] | transcript_product=Proteasome/cyclosome repeat-containing protein | location=TGGT1_chrVIIb:808221-820240(-) | protein_length=988 | sequence_SO=chromosome | SO=protein_coding_gene | is_pseudo=false	1	2728.23	19
FALSE	High	NANTDIEGATTDDQDLSEEDAKK	[K].NANTDIEGATTDDQDLSEEDAKK.[T]	2xTMTpro [K22; K23]; 1xTMTpro [N-Term]; 1xPhospho [S17(100)]	2xTMTpro [K22; K23]; 1xTMTpro [N-Term]; 1xPhospho [T4(0); T10(0); T11(0); S17(100)]	6.8962e-12	5.34993e-05	1	1	3	TGGT1_253750-t26_1-p1	TGGT1_253750-t26_1-p1 [3531-3553]	TGGT1_253750-t26_1-p1 1xPhospho [T3534(0); T3540(0); T3541(0); S3547(100)]	TGGT1_253750-t26_1-p1 1xPhospho [S3547(100)]	transcript=TGGT1_253750-t26_1 | gene=TGGT1_253750 | organism=Toxoplasma_gondii_GT1 | gene_product=PLU-1 domain-containing protein [Source:UniProtKB/TrEMBL;Acc:S7ULT6] | transcript_product=PLU-1 family protein | location=TGGT1_chrIII:1126566-1154665(-) | protein_length=8088 | sequence_SO=chromosome | SO=protein_coding_gene | is_pseudo=false	1	3472.68	23	0.943	0.803	1.009	0.907	0.855	0.728	0.915	0.831	0.538	0.825	-0.08	-0.32	0.01	-0.14	-0.23	-0.46	-0.13	-0.27	-0.89	-0.28	0.750686	0.272569	0.976148	0.840564	0.633539	0.462206	0.649826	0.567168	0.373767	0.258991	0.962682
FALSE	High	NANTISPPDVGNLQTEEVR	[R].NANTISPPDVGNLQTEEVR.[K]	1xTMTpro [N-Term]; 1xPhospho [S6(100)]	1xTMTpro [N-Term]; 1xPhospho [T4(0); S6(100); T15(0)]	2.00801e-07	5.34993e-05	1	1	2	TGGT1_222900-t26_1-p1	TGGT1_222900-t26_1-p1 [1028-1046]	TGGT1_222900-t26_1-p1 1xPhospho [T1031(0); S1033(100); T1042(0)]	TGGT1_222900-t26_1-p1 1xPhospho [S1033(100)]	transcript=TGGT1_222900-t26_1 | gene=TGGT1_222900 | organism=Toxoplasma_gondii_GT1 | gene_product=Phosphoserine phosphatase [Source:UniProtKB/TrEMBL;Acc:S7UL15] | transcript_product=phosphoserine phosphatase | location=TGGT1_chrII:1266680-1283473(-) | protein_length=1766 | sequence_SO=chromosome | SO=protein_coding_gene | is_pseudo=false	0	2438.19	19	1.075	0.921	0.996	0.86	0.924	0.792	0.857	0.886	0.845	0.908	0.1	-0.12	-0.01	-0.22	-0.11	-0.34	-0.22	-0.17	-0.24	-0.14	0.0829118	0.620037	0.877996	0.0721671	0.0623233	0.34173	0.0137667	0.664547	0.23354	0.298858	0.8946
FALSE	High	NAPSGEEAQQPK	[K].NAPSGEEAQQPK.[K]	1xTMTpro [K12]; 1xTMTpro [N-Term]	1xTMTpro [K12]; 1xTMTpro [N-Term]	0.000303226	5.34993e-05	1	1	3	TGGT1_316340-t26_1-p1	TGGT1_316340-t26_1-p1 [10-21]			transcript=TGGT1_316340-t26_1 | gene=TGGT1_316340 | organism=Toxoplasma_gondii_GT1 | gene_product=hypothetical protein | transcript_product=hypothetical protein | location=TGGT1_chrXI:5191484-5192942(+) | protein_length=243 | sequence_SO=chromosome | SO=protein_coding_gene | is_pseudo=false	0	1864.01	12	1.088	0.881	0.908	1.113	1.21	0.981	1.011	1.194	1.172	1.283	0.12	-0.18	-0.14	0.15	0.28	-0.03	0.02	0.26	0.23	0.36	0.390704	0.547056	0.522512	0.291629	0.33755	0.86916	0.867346	0.538722	0.0752008	0.245701	0.909509
FALSE	High	NAPSSFCSFSDLEQDEGDATTGPEPSSR	[R].NAPSSFCSFSDLEQDEGDATTGPEPSSR.[A]	1xMethylthio [C7]; 1xTMTpro [N-Term]; 1xPhospho [S10(99.6)]	1xMethylthio [C7]; 1xTMTpro [N-Term]; 1xPhospho [S4(0); S5(0); S8(0.4); S10(99.6); T20(0); T21(0); S26(0); S27(0)]	6.44593e-12	5.34993e-05	1	1	1	TGGT1_237410-t26_1-p1	TGGT1_237410-t26_1-p1 [450-477]	TGGT1_237410-t26_1-p1 1xMethylthio [C456]; 1xPhospho [S453(0); S454(0); S457(0.4); S459(99.6); T469(0); T470(0); S475(0); S476(0)]	TGGT1_237410-t26_1-p1 1xMethylthio [C456]; 1xPhospho [S459(99.6)]	transcript=TGGT1_237410-t26_1 | gene=TGGT1_237410 | organism=Toxoplasma_gondii_GT1 | gene_product=PPM-type phosphatase domain-containing protein [Source:UniProtKB/TrEMBL;Acc:S7W5F9] | transcript_product=protein phosphatase 2C domain-containing protein | location=TGGT1_chrX:5736246-5740962(-) | protein_length=1497 | sequence_SO=chromosome | SO=protein_coding_gene | is_pseudo=false	0	3361.38	28
FALSE	High	NASHGEESDAEAK	[R].NASHGEESDAEAK.[G]	1xTMTpro [K13]; 1xTMTpro [N-Term]; 1xPhospho [S8(100)]	1xTMTpro [K13]; 1xTMTpro [N-Term]; 1xPhospho [S3(0); S8(100)]	2.65073e-11	5.34993e-05	1	1	14	TGGT1_228100-t26_1-p1	TGGT1_228100-t26_1-p1 [646-658]	TGGT1_228100-t26_1-p1 1xPhospho [S648(0); S653(100)]	TGGT1_228100-t26_1-p1 1xPhospho [S653(100)]	transcript=TGGT1_228100-t26_1 | gene=TGGT1_228100 | organism=Toxoplasma_gondii_GT1 | gene_product=hypothetical protein | transcript_product=hypothetical protein | location=TGGT1_chrX:493043-502437(-) | protein_length=1314 | sequence_SO=chromosome | SO=protein_coding_gene | is_pseudo=false	0	2032.95	13	0.864	0.86	0.833	1.126	0.973	0.969	0.938	0.973	0.935	0.941	-0.21	-0.22	-0.26	0.17	-0.04	-0.05	-0.09	-0.04	-0.1	-0.09	0.324155	0.373141	0.386055	0.512507	0.6257	0.401519	0.0357864	0.757404	0.0940685	0.365944	0.9065
FALSE	High	NASQESVLPHLR	[R].NASQESVLPHLR.[S]	1xTMTpro [N-Term]; 1xPhospho [S3(100)]	1xTMTpro [N-Term]; 1xPhospho [S3(100); S6(0)]	9.64815e-06	5.34993e-05	1	1	2	TGGT1_237280-t26_1-p1	TGGT1_237280-t26_1-p1 [1061-1072]	TGGT1_237280-t26_1-p1 1xPhospho [S1063(100); S1066(0)]	TGGT1_237280-t26_1-p1 1xPhospho [S1063(100)]	transcript=TGGT1_237280-t26_1 | gene=TGGT1_237280 | organism=Toxoplasma_gondii_GT1 | gene_product=Rab-GAP TBC domain-containing protein [Source:UniProtKB/TrEMBL;Acc:S7UQ40] | transcript_product=TLD protein | location=TGGT1_chrX:5711509-5719913(+) | protein_length=2190 | sequence_SO=chromosome | SO=protein_coding_gene | is_pseudo=false	0	1734.89	12	0.878	0.895	1.034	1.17	1.026	1.047	1.209	1.004	1.059	1.018	-0.19	-0.16	0.05	0.23	0.04	0.07	0.27	0.01	0.08	0.03	0.654055	0.435339	0.879039	0.0984552	0.91425	0.615372	0.424384	0.979919	0.572399	0.733979	0.948642
FALSE	High	NASQSDGDEVEEQVAEETSDAR	[K].NASQSDGDEVEEQVAEETSDAR.[A]	1xTMTpro [N-Term]; 1xPhospho [S5(100)]	1xTMTpro [N-Term]; 1xPhospho [S3(0); S5(100); T18(0); S19(0)]	7.02933e-09	5.34993e-05	1	1	2	TGGT1_311230-t26_1-p1	TGGT1_311230-t26_1-p1 [1047-1068]	TGGT1_311230-t26_1-p1 1xPhospho [S1049(0); S1051(100); T1064(0); S1065(0)]	TGGT1_311230-t26_1-p1 1xPhospho [S1051(100)]	transcript=TGGT1_311230-t26_1 | gene=TGGT1_311230 | organism=Toxoplasma_gondii_GT1 | gene_product=hypothetical protein | transcript_product=hypothetical protein | location=TGGT1_chrXI:1844321-1862670(+) | protein_length=4603 | sequence_SO=chromosome | SO=protein_coding_gene | is_pseudo=false	0	2750.16	22
FALSE	High	NASSEDPPFAPTLPSLSCSNSPLR	[R].NASSEDPPFAPTLPSLSCSNSPLR.[C]	1xMethylthio [C18]; 1xTMTpro [N-Term]; 1xPhospho [S4(99.7)]	1xMethylthio [C18]; 1xTMTpro [N-Term]; 1xPhospho [S3(0.3); S4(99.7); T12(0); S15(0); S17(0); S19(0); S21(0)]	1.47524e-13	5.34993e-05	1	1	2	TGGT1_247330-t26_1-p1	TGGT1_247330-t26_1-p1 [45-68]	TGGT1_247330-t26_1-p1 1xMethylthio [C62]; 1xPhospho [S47(0.3); S48(99.7); T56(0); S59(0); S61(0); S63(0); S65(0)]	TGGT1_247330-t26_1-p1 1xMethylthio [C62]; 1xPhospho [S48(99.7)]	transcript=TGGT1_247330-t26_1 | gene=TGGT1_247330 | organism=Toxoplasma_gondii_GT1 | gene_product=Symplekin_C domain-containing protein [Source:UniProtKB/TrEMBL;Acc:S7W9Q9] | transcript_product=hypothetical protein | location=TGGT1_chrXII:3187009-3202779(-) | protein_length=1940 | sequence_SO=chromosome | SO=protein_coding_gene | is_pseudo=false	0	2917.34	24	1.14	0.978	1.079	0.923	1.052	0.902	0.996	0.989	0.851	0.782	0.19	-0.03	0.11	-0.12	0.07	-0.15	-0.01	-0.02	-0.23	-0.36	0.726794	0.924878	0.86272	0.753905	0.669807	0.0643289	0.982255	0.937729	0.533646	0.117666	0.959991
FALSE	High	NASSSSGCSSSPAAPTGSSLSPSSK	[R].NASSSSGCSSSPAAPTGSSLSPSSK.[K]	1xMethylthio [C8]; 1xTMTpro [K25]; 1xTMTpro [N-Term]; 1xPhospho [S21(99.8)]	1xMethylthio [C8]; 1xTMTpro [K25]; 1xTMTpro [N-Term]; 1xPhospho [S3(0); S4(0); S5(0); S6(0); S9(0); S10(0); S11(0); T16(0); S18(0); S19(0); S21(99.8); S23(0.2); S24(0)]	2.58083e-10	5.34993e-05	1	1	1	TGGT1_229750-t26_1-p1	TGGT1_229750-t26_1-p1 [65-89]	TGGT1_229750-t26_1-p1 1xMethylthio [C72]; 1xPhospho [S67(0); S68(0); S69(0); S70(0); S73(0); S74(0); S75(0); T80(0); S82(0); S83(0); S85(99.8); S87(0.2); S88(0)]	TGGT1_229750-t26_1-p1 1xMethylthio [C72]; 1xPhospho [S85(99.8)]	transcript=TGGT1_229750-t26_1 | gene=TGGT1_229750 | organism=Toxoplasma_gondii_GT1 | gene_product=hypothetical protein | transcript_product=hypothetical protein | location=TGGT1_chrVIII:414321-424829(-) | protein_length=1358 | sequence_SO=chromosome | SO=protein_coding_gene | is_pseudo=false	0	2975.36	25
FALSE	High	NATEGADDPTDKDEEPPER	[R].NATEGADDPTDKDEEPPER.[R]	1xTMTpro [K12]; 1xTMTpro [N-Term]; 1xPhospho [T10(100)]	1xTMTpro [K12]; 1xTMTpro [N-Term]; 1xPhospho [T3(0); T10(100)]	3.99404e-05	5.34993e-05	1	1	3	TGGT1_313040-t26_1-p1	TGGT1_313040-t26_1-p1 [155-173]	TGGT1_313040-t26_1-p1 1xPhospho [T157(0); T164(100)]	TGGT1_313040-t26_1-p1 1xPhospho [T164(100)]	transcript=TGGT1_313040-t26_1 | gene=TGGT1_313040 | organism=Toxoplasma_gondii_GT1 | gene_product=hypothetical protein | transcript_product=hypothetical protein | location=TGGT1_chrXI:3026132-3027398(-) | protein_length=361 | sequence_SO=chromosome | SO=protein_coding_gene | is_pseudo=false	1	2774.26	19
FALSE	High	NATTESDLTEK	[R].NATTESDLTEK.[R]	1xTMTpro [K11]; 1xTMTpro [N-Term]	1xTMTpro [K11]; 1xTMTpro [N-Term]	0.000391932	5.34993e-05	1	1	1	TGGT1_227360-t26_1-p1	TGGT1_227360-t26_1-p1 [292-302]			transcript=TGGT1_227360-t26_1 | gene=TGGT1_227360 | organism=Toxoplasma_gondii_GT1 | gene_product=Ribosomal protein RPL3 [Source:UniProtKB/TrEMBL;Acc:A0A125YQV1] | transcript_product=ribosomal protein RPL3 | location=TGGT1_chrX:901297-903989(-) | protein_length=389 | sequence_SO=chromosome | SO=protein_coding_gene | is_pseudo=false	0	1816.98	11	0.881	0.986	0.923	1.323	1.166	1.305	1.221	1.223	1.136	1.132	-0.18	-0.02	-0.12	0.4	0.22	0.38	0.29	0.29	0.18	0.18	0.20636	0.917855	0.750945	0.267193	0.31374	0.0471608	0.215001	0.554792	0.564466	0.0314101	0.900211
FALSE	High	NAVGITHQNTLQWR	[R].NAVGITHQNTLQWR.[C]	1xTMTpro [N-Term]; 1xPhospho [T10(100)]	1xTMTpro [N-Term]; 1xPhospho [T6(0); T10(100)]	0.000158779	5.34993e-05	1	1	1	TGGT1_291890-t26_1-p1	TGGT1_291890-t26_1-p1 [71-84]	TGGT1_291890-t26_1-p1 1xPhospho [T76(0); T80(100)]	TGGT1_291890-t26_1-p1 1xPhospho [T80(100)]	transcript=TGGT1_291890-t26_1 | gene=TGGT1_291890 | organism=Toxoplasma_gondii_GT1 | gene_product=TgMIC1 domain-containing protein [Source:UniProtKB/TrEMBL;Acc:S7VXI3] | transcript_product=microneme protein MIC1 | location=TGGT1_chrIX:4200849-4203191(-) | protein_length=456 | sequence_SO=chromosome | SO=protein_coding_gene | is_pseudo=false	0	2022.02	14
FALSE	High	NCMQRPPSIDAADSR	[K].NCMQRPPSIDAADSR.[A]	1xMethylthio [C2]; 1xTMTpro [N-Term]; 1xPhospho [S8(100)]	1xMethylthio [C2]; 1xTMTpro [N-Term]; 1xPhospho [S8(100); S14(0)]	0.000194813	5.34993e-05	1	1	2	TGGT1_214960-t26_1-p1	TGGT1_214960-t26_1-p1 [418-432]	TGGT1_214960-t26_1-p1 1xMethylthio [C419]; 1xPhospho [S425(100); S431(0)]	TGGT1_214960-t26_1-p1 1xMethylthio [C419]; 1xPhospho [S425(100)]	transcript=TGGT1_214960-t26_1 | gene=TGGT1_214960 | organism=Toxoplasma_gondii_GT1 | gene_product=AP2 domain transcription factor AP2X-8 [Source:UniProtKB/TrEMBL;Acc:S7URI0] | transcript_product=AP2 domain transcription factor AP2X-8 | location=TGGT1_chrX:6507474-6521102(+) | protein_length=3817 | sequence_SO=chromosome | SO=protein_coding_gene | is_pseudo=false	0	2090.91	15	1.006	0.89	0.998	1.018	1.024	0.905	1.016	0.952	1.102	1.225	0.01	-0.17	0	0.03	0.03	-0.14	0.02	-0.07	0.14	0.29	0.942527	0.177097	0.947867	0.913809	0.923207	0.49241	0.904774	0.524627	0.694553	0.035549	0.992953
FALSE	High	NDALHALASTLAK	[K].NDALHALASTLAK.[C]	1xTMTpro [K13]; 1xTMTpro [N-Term]; 1xPhospho [S9(100)]	1xTMTpro [K13]; 1xTMTpro [N-Term]; 1xPhospho [S9(100); T10(0)]	0.000106606	5.34993e-05	1	1	2	TGGT1_226390-t26_1-p1	TGGT1_226390-t26_1-p1 [786-798]	TGGT1_226390-t26_1-p1 1xPhospho [S794(100); T795(0)]	TGGT1_226390-t26_1-p1 1xPhospho [S794(100)]	transcript=TGGT1_226390-t26_1 | gene=TGGT1_226390 | organism=Toxoplasma_gondii_GT1 | gene_product=Hydrolase_4 domain-containing protein [Source:UniProtKB/TrEMBL;Acc:S7UXI2] | transcript_product=hypothetical protein | location=TGGT1_chrX:1573502-1576501(+) | protein_length=999 | sequence_SO=chromosome | SO=protein_coding_gene | is_pseudo=false	0	2013.1	13	1.877	2.823	2.272	0.763	1.432	2.153	1.733	1.863	2.411	2.42	0.91	1.5	1.18	-0.39	0.52	1.11	0.79	0.9	1.27	1.28	0.378683	0.183714	0.253642	0.074296	0.576738	0.265557	0.382859	0.13375	0.216197	0.15571	0.909509
FALSE	High	NDEGEDERDENEEDR	[R].NDEGEDERDENEEDR.[E]	1xTMTpro [N-Term]	1xTMTpro [N-Term]	2.01083e-05	5.34993e-05	1	1	1	TGGT1_228350-t26_1-p1	TGGT1_228350-t26_1-p1 [1166-1180]			transcript=TGGT1_228350-t26_1 | gene=TGGT1_228350 | organism=Toxoplasma_gondii_GT1 | gene_product=Tr-type G domain-containing protein [Source:UniProtKB/TrEMBL;Acc:S7WDC5] | transcript_product=elongation factor Tu GTP binding domain-containing protein | location=TGGT1_chrX:291937-306405(+) | protein_length=1879 | sequence_SO=chromosome | SO=protein_coding_gene | is_pseudo=false	1	2154.9	15
FALSE	High	NDEPVREEDLPEEEEEDEGEEGGAAAGDK	[K].NDEPVREEDLPEEEEEDEGEEGGAAAGDK.[K]	1xTMTpro [K29]; 1xTMTpro [N-Term]	1xTMTpro [K29]; 1xTMTpro [N-Term]	7.54771e-13	5.34993e-05	1	1	8	TGGT1_305460-t26_1-p1	TGGT1_305460-t26_1-p1 [32-60]			transcript=TGGT1_305460-t26_1 | gene=TGGT1_305460 | organism=Toxoplasma_gondii_GT1 | gene_product=Methionine aminopeptidase 2 [Source:UniProtKB/TrEMBL;Acc:S7UI71] | transcript_product=putative methionine aminopeptidase 2 | location=TGGT1_chrIX:5179135-5184773(-) | protein_length=480 | sequence_SO=chromosome | SO=protein_coding_gene | is_pseudo=false	1	3752.7	29	0.919	1.035	0.931	1.003	0.921	1.038	0.933	0.869	1.006	0.878	-0.12	0.05	-0.1	0	-0.12	0.05	-0.1	-0.2	0.01	-0.19	0.285537	0.795358	0.0345801	0.994351	0.843722	0.872769	0.847533	0.597138	0.984936	0.668994	0.904439
FALSE	High	NDGEESTDRTPLLPGAPR	[R].NDGEESTDRTPLLPGAPR.[A]	1xTMTpro [N-Term]; 1xPhospho [S6(99.7)]	1xTMTpro [N-Term]; 1xPhospho [S6(99.7); T7(0.3); T10(0)]	7.12218e-05	5.34993e-05	1	1	5	Q9NRA2	Q9NRA2 [11-28]	Q9NRA2 1xPhospho [S16(99.7); T17(0.3); T20(0)]	Q9NRA2 1xPhospho [S16(99.7)]	Sialin OS=Homo sapiens (Human) OX=9606 GN=SLC17A5 PE=1 SV=2	1	2309.11	18	1.013	0.819	0.891	1.052	1.066	0.862	0.938	1.004	0.866	0.934	0.02	-0.29	-0.17	0.07	0.09	-0.21	-0.09	0.01	-0.21	-0.1	0.715586	0.373753	0.578712	0.495024	0.55803	0.565754	0.630003	0.972008	0.0297971	0.475497	0.959114
FALSE	High	NDGSEKPGGEEEEEEEDELSVVSESR	[K].NDGSEKPGGEEEEEEEDELSVVSESR.[V]	1xTMTpro [K6]; 1xTMTpro [N-Term]; 1xPhospho [S20(100)]	1xTMTpro [K6]; 1xTMTpro [N-Term]; 1xPhospho [S4(0); S20(100); S23(0); S25(0)]	1.19215e-08	5.34993e-05	1	1	5	TGGT1_278440-t26_1-p1	TGGT1_278440-t26_1-p1 [2181-2206]	TGGT1_278440-t26_1-p1 1xPhospho [S2184(0); S2200(100); S2203(0); S2205(0)]	TGGT1_278440-t26_1-p1 1xPhospho [S2200(100)]	transcript=TGGT1_278440-t26_1 | gene=TGGT1_278440 | organism=Toxoplasma_gondii_GT1 | gene_product=Putative SWI2/SNF2 Brahma [Source:UniProtKB/TrEMBL;Acc:S7UZS0] | transcript_product=putative SWI2/SNF2 Brahma | location=TGGT1_chrXII:6010021-6025169(+) | protein_length=2667 | sequence_SO=chromosome | SO=protein_coding_gene | is_pseudo=false	0	3553.58	26
FALSE	High	NDGSKSPIDSEIEHTHK	[R].NDGSKSPIDSEIEHTHK.[R]	2xTMTpro [K5; K17]; 1xTMTpro [N-Term]; 1xPhospho [S/T]	2xTMTpro [K5; K17]; 1xTMTpro [N-Term]; 1xPhospho [S4(50); S6(50); S10(0); T15(0)]	0.00015325	5.34993e-05	1	1	1	TGGT1_269940-t26_1-p1	TGGT1_269940-t26_1-p1 [202-218]			transcript=TGGT1_269940-t26_1 | gene=TGGT1_269940 | organism=Toxoplasma_gondii_GT1 | gene_product=ASCH domain-containing protein [Source:UniProtKB/TrEMBL;Acc:S7V3Y0] | transcript_product=zinc finger motif, C2HC5-type protein | location=TGGT1_chrVIII:5507751-5513794(+) | protein_length=1191 | sequence_SO=chromosome | SO=protein_coding_gene | is_pseudo=false	1	2886.48	17	1.114	1.029	0.693	0.777	0.865	0.799	0.538	0.898	0.893	0.633	0.16	0.04	-0.53	-0.36	-0.21	-0.32	-0.89	-0.16	-0.16	-0.66	0.0792624	0.890687	0.389451	0.307197	0.502766	0.0919911	0.126984	0.677014	0.59241	0.187125	0.8946
FALSE	High	NDKSEEEQSSSSVK	[K].NDKSEEEQSSSSVK.[K]	2xTMTpro [K3; K14]; 1xTMTpro [N-Term]; 1xPhospho [S4(100)]	2xTMTpro [K3; K14]; 1xTMTpro [N-Term]; 1xPhospho [S4(100); S9(0); S10(0); S11(0); S12(0)]	8.57773e-05	5.34993e-05	1	1	4	P07910	P07910 [230-243]	P07910 1xPhospho [S233(100); S238(0); S239(0); S240(0); S241(0)]	P07910 1xPhospho [S233(100)]	Heterogeneous nuclear ribonucleoproteins C1/C2 OS=Homo sapiens (Human) OX=9606 GN=HNRNPC PE=1 SV=4	1	2546.28	14	0.856	0.961	0.919	1.188	1.017	1.142	1.091	0.993	1.001	1.034	-0.22	-0.06	-0.12	0.25	0.02	0.19	0.13	-0.01	0	0.05	0.479415	0.511948	0.438466	0.37834	0.959283	0.32866	0.31145	0.960531	0.947786	0.599733	0.919077
FALSE	High	NDQEQPSHDEPEAESGDAGNEETEEHVSDAGEEECADK	[K].NDQEQPSHDEPEAESGDAGNEETEEHVSDAGEEECADK.[Q]	1xMethylthio [C35]; 1xTMTpro [K38]; 1xTMTpro [N-Term]; 1xPhospho [T/S]	1xMethylthio [C35]; 1xTMTpro [K38]; 1xTMTpro [N-Term]; 1xPhospho [S7(0); S15(0); T23(50); S28(50)]	9.20582e-13	5.34993e-05	1	1	3	TGGT1_242625-t26_1-p1	TGGT1_242625-t26_1-p1 [8341-8378]	TGGT1_242625-t26_1-p1 1xMethylthio [C8375]	TGGT1_242625-t26_1-p1 1xMethylthio [C8375]	transcript=TGGT1_242625-t26_1 | gene=TGGT1_242625 | organism=Toxoplasma_gondii_GT1 | gene_product=VWFA domain-containing protein [Source:UniProtKB/TrEMBL;Acc:S7W745] | transcript_product=ATPase family associated with various cellular activities (AAA) subfamily protein | location=TGGT1_chrVI:2016753-2051315(+) | protein_length=9029 | sequence_SO=chromosome | SO=protein_coding_gene | is_pseudo=false	0	4847.94	38
FALSE	High	NDSEAHDSVASSESSDAER	[R].NDSEAHDSVASSESSDAER.[K]	1xTMTpro [N-Term]; 1xPhospho [S3(100)]	1xTMTpro [N-Term]; 1xPhospho [S3(100); S8(0); S11(0); S12(0); S14(0); S15(0)]	4.29557e-09	5.34993e-05	1	1	5	TGGT1_310010-t26_1-p1	TGGT1_310010-t26_1-p1 [89-107]	TGGT1_310010-t26_1-p1 1xPhospho [S91(100); S96(0); S99(0); S100(0); S102(0); S103(0)]	TGGT1_310010-t26_1-p1 1xPhospho [S91(100)]	transcript=TGGT1_310010-t26_1 | gene=TGGT1_310010 | organism=Toxoplasma_gondii_GT1 | gene_product=Sushi domain-containing protein [Source:UniProtKB/TrEMBL;Acc:S7UT16] | transcript_product=rhoptry neck protein RON1 | location=TGGT1_chrXI:969238-974493(+) | protein_length=1158 | sequence_SO=chromosome | SO=protein_coding_gene | is_pseudo=false	0	2376.97	19	1.303	1.42	1.435	0.667	0.87	0.948	0.957	0.713	0.88	0.699	0.38	0.51	0.52	-0.58	-0.2	-0.08	-0.06	-0.49	-0.18	-0.52	0.565967	0.406951	0.215263	0.135618	0.792701	0.902552	0.872512	0.142741	0.73123	0.0655682	0.933506
FALSE	High	NDSEAHDSVASSESSDAER	[R].NDSEAHDSVASSESSDAER.[K]	1xTMTpro [N-Term]; 2xPhospho [S8(100); S]	1xTMTpro [N-Term]; 2xPhospho [S3(0); S8(100); S11(49.6); S12(49.6); S14(0.4); S15(0.4)]	0.000171109	5.34993e-05	1	1	1	TGGT1_310010-t26_1-p1	TGGT1_310010-t26_1-p1 [89-107]	TGGT1_310010-t26_1-p1 2xPhospho [S91(0); S96(100); S99(49.6); S100(49.6); S102(0.4); S103(0.4)]	TGGT1_310010-t26_1-p1 2xPhospho [S96(100); S]	transcript=TGGT1_310010-t26_1 | gene=TGGT1_310010 | organism=Toxoplasma_gondii_GT1 | gene_product=Sushi domain-containing protein [Source:UniProtKB/TrEMBL;Acc:S7UT16] | transcript_product=rhoptry neck protein RON1 | location=TGGT1_chrXI:969238-974493(+) | protein_length=1158 | sequence_SO=chromosome | SO=protein_coding_gene | is_pseudo=false	0	2456.94	19
FALSE	High	NDSETLSDDEEHDGK	[K].NDSETLSDDEEHDGK.[D]	1xTMTpro [K15]; 1xTMTpro [N-Term]; 1xPhospho [S7(100)]	1xTMTpro [K15]; 1xTMTpro [N-Term]; 1xPhospho [S3(0); T5(0); S7(100)]	2.5911e-10	5.34993e-05	1	1	4	TGGT1_248110-t26_1-p1	TGGT1_248110-t26_1-p1 [200-214]	TGGT1_248110-t26_1-p1 1xPhospho [S202(0); T204(0); S206(100)]	TGGT1_248110-t26_1-p1 1xPhospho [S206(100)]	transcript=TGGT1_248110-t26_1 | gene=TGGT1_248110 | organism=Toxoplasma_gondii_GT1 | gene_product=hypothetical protein | transcript_product=hypothetical protein | location=TGGT1_chrXII:3594425-3597355(-) | protein_length=493 | sequence_SO=chromosome | SO=protein_coding_gene | is_pseudo=false	0	2379.05	15	0.888	0.919	0.843	1.236	1.098	1.136	1.041	1.098	1.218	1.124	-0.17	-0.12	-0.25	0.31	0.13	0.18	0.06	0.14	0.28	0.17	0.481904	0.300298	0.129995	0.444588	0.80144	0.665879	0.824214	0.582828	0.425173	0.570984	0.919786
FALSE	High	NDSKPDGESHSNAAPESAENEK	[K].NDSKPDGESHSNAAPESAENEK.[S]	2xTMTpro [K4; K22]; 1xTMTpro [N-Term]	2xTMTpro [K4; K22]; 1xTMTpro [N-Term]	2.34444e-07	5.34993e-05	1	1	1	TGGT1_225860-t26_1-p1	TGGT1_225860-t26_1-p1 [477-498]			transcript=TGGT1_225860-t26_1 | gene=TGGT1_225860 | organism=Toxoplasma_gondii_GT1 | gene_product=hypothetical protein | transcript_product=hypothetical protein | location=TGGT1_chrX:1897405-1902365(-) | protein_length=1057 | sequence_SO=chromosome | SO=protein_coding_gene | is_pseudo=false	0	3225.61	22
FALSE	High	NDSKPDGESHSNAAPESAENEK	[K].NDSKPDGESHSNAAPESAENEK.[S]	2xTMTpro [K4; K22]; 1xTMTpro [N-Term]; 1xPhospho [S9(99.2)]	2xTMTpro [K4; K22]; 1xTMTpro [N-Term]; 1xPhospho [S3(0.4); S9(99.2); S11(0.4); S17(0)]	3.01398e-06	5.34993e-05	1	1	2	TGGT1_225860-t26_1-p1	TGGT1_225860-t26_1-p1 [477-498]	TGGT1_225860-t26_1-p1 1xPhospho [S479(0.4); S485(99.2); S487(0.4); S493(0)]	TGGT1_225860-t26_1-p1 1xPhospho [S485(99.2)]	transcript=TGGT1_225860-t26_1 | gene=TGGT1_225860 | organism=Toxoplasma_gondii_GT1 | gene_product=hypothetical protein | transcript_product=hypothetical protein | location=TGGT1_chrX:1897405-1902365(-) | protein_length=1057 | sequence_SO=chromosome | SO=protein_coding_gene | is_pseudo=false	0	3305.57	22
FALSE	High	NDTAALLEATNEAVR	[R].NDTAALLEATNEAVR.[E]	1xTMTpro [N-Term]; 1xPhospho [T3(100)]	1xTMTpro [N-Term]; 1xPhospho [T3(100); T10(0)]	0.000102883	5.34993e-05	1	1	2	TGGT1_294610-t26_1-p1	TGGT1_294610-t26_1-p1 [1514-1528]	TGGT1_294610-t26_1-p1 1xPhospho [T1516(100); T1523(0)]	TGGT1_294610-t26_1-p1 1xPhospho [T1516(100)]	transcript=TGGT1_294610-t26_1 | gene=TGGT1_294610 | organism=Toxoplasma_gondii_GT1 | gene_product=SET domain-containing protein [Source:UniProtKB/TrEMBL;Acc:A0A125YKT4] | transcript_product=putative histone lysine methyltransferase, SET | location=TGGT1_chrIa:979977-985190(-) | protein_length=1737 | sequence_SO=chromosome | SO=protein_coding_gene | is_pseudo=false	0	1971.97	15
FALSE	High	MSFPSSNLAGVPFPEATGCR	[R].MSFPSSNLAGVPFPEATGCR.[H]	1xOxidation [M1]; 1xMethylthio [C19]; 1xTMTpro [N-Term]; 1xPhospho [S2(100)]	1xOxidation [M1]; 1xMethylthio [C19]; 1xTMTpro [N-Term]; 1xPhospho [S2(100); S5(0); S6(0); T17(0)]	7.06252e-12	5.34993e-05	1	1	2	TGGT1_255980-t26_1-p1	TGGT1_255980-t26_1-p1 [123-142]	TGGT1_255980-t26_1-p1 1xMethylthio [C141]; 1xPhospho [S124(100); S127(0); S128(0); T139(0)]	TGGT1_255980-t26_1-p1 1xMethylthio [C141]; 1xPhospho [S124(100)]	transcript=TGGT1_255980-t26_1 | gene=TGGT1_255980 | organism=Toxoplasma_gondii_GT1 | gene_product=DUF1298 domain-containing protein [Source:UniProtKB/TrEMBL;Acc:S7UZN5] | transcript_product=hypothetical protein | location=TGGT1_chrVIIb:4490347-4497834(+) | protein_length=670 | sequence_SO=chromosome | SO=protein_coding_gene | is_pseudo=false	0	2514.12	20	0.904	1.061	1.135	0.953	0.862	1.012	1.083	1.013	0.906	1.112	-0.14	0.09	0.18	-0.07	-0.21	0.02	0.11	0.02	-0.14	0.15	0.675979	0.86559	0.617759	0.824865	0.0482921	0.930589	0.132318	0.884505	0.116343	0.601917	0.952203
FALSE	High	MSFPSSNLAGVPFPEATGCR	[R].MSFPSSNLAGVPFPEATGCR.[H]	1xMethylthio [C19]; 1xTMTpro [N-Term]; 1xPhospho [S2(100)]	1xMethylthio [C19]; 1xTMTpro [N-Term]; 1xPhospho [S2(100); S5(0); S6(0); T17(0)]	5.31559e-14	5.34993e-05	1	1	2	TGGT1_255980-t26_1-p1	TGGT1_255980-t26_1-p1 [123-142]	TGGT1_255980-t26_1-p1 1xMethylthio [C141]; 1xPhospho [S124(100); S127(0); S128(0); T139(0)]	TGGT1_255980-t26_1-p1 1xMethylthio [C141]; 1xPhospho [S124(100)]	transcript=TGGT1_255980-t26_1 | gene=TGGT1_255980 | organism=Toxoplasma_gondii_GT1 | gene_product=DUF1298 domain-containing protein [Source:UniProtKB/TrEMBL;Acc:S7UZN5] | transcript_product=hypothetical protein | location=TGGT1_chrVIIb:4490347-4497834(+) | protein_length=670 | sequence_SO=chromosome | SO=protein_coding_gene | is_pseudo=false	0	2498.12	20
FALSE	High	MSAPTPPPSPFQTAEQR	[R].MSAPTPPPSPFQTAEQR.[Q]	1xTMTpro [N-Term]; 1xPhospho [T5(100)]	1xTMTpro [N-Term]; 1xPhospho [S2(0); T5(100); S9(0); T13(0)]	1.19469e-06	5.34993e-05	1	1	1	TGGT1_250850-t26_1-p1	TGGT1_250850-t26_1-p1 [437-453]	TGGT1_250850-t26_1-p1 1xPhospho [S438(0); T441(100); S445(0); T449(0)]	TGGT1_250850-t26_1-p1 1xPhospho [T441(100)]	transcript=TGGT1_250850-t26_1 | gene=TGGT1_250850 | organism=Toxoplasma_gondii_GT1 | gene_product=Protein kinase domain-containing protein [Source:UniProtKB/TrEMBL;Acc:S7W8T2] | transcript_product=putative CMGC kinase | location=TGGT1_chrXII:5203873-5211981(-) | protein_length=2682 | sequence_SO=chromosome | SO=protein_coding_gene | is_pseudo=false	0	2226.06	17	0.971	0.751	0.81	1.082	1.05	0.813	0.877	0.847	1.143	0.975	-0.04	-0.41	-0.3	0.11	0.07	-0.3	-0.19	-0.24	0.19	-0.04	0.894009	0.250199	0.197118	0.234452	0.796442	0.256096	0.17409	0.421546	0.311673	0.59878	0.986237
FALSE	High	MSADSVPQIEGEGEEHESEADDKESK	[R].MSADSVPQIEGEGEEHESEADDKESK.[V]	1xOxidation [M1]; 2xTMTpro [K23; K26]; 1xTMTpro [N-Term]; 1xPhospho [S18(100)]	1xOxidation [M1]; 2xTMTpro [K23; K26]; 1xTMTpro [N-Term]; 1xPhospho [S2(0); S5(0); S18(100); S25(0)]	4.79923e-13	5.34993e-05	1	1	1	TGGT1_230690-t26_1-p1	TGGT1_230690-t26_1-p1 [1098-1123]	TGGT1_230690-t26_1-p1 1xPhospho [S1099(0); S1102(0); S1115(100); S1122(0)]	TGGT1_230690-t26_1-p1 1xPhospho [S1115(100)]	transcript=TGGT1_230690-t26_1 | gene=TGGT1_230690 | organism=Toxoplasma_gondii_GT1 | gene_product=LNS2 domain-containing protein [Source:UniProtKB/TrEMBL;Acc:S7V2T5] | transcript_product=LNS2 (Lipin/Ned1/Smp2) protein | location=TGGT1_chrVIII:959180-970351(-) | protein_length=1575 | sequence_SO=chromosome | SO=protein_coding_gene | is_pseudo=false	1	3841.78	26	0.996	0.841	1.026	1.027	1.024	0.864	1.054	1.274	0.988	0.89	-0.01	-0.25	0.04	0.04	0.03	-0.21	0.08	0.35	-0.02	-0.17	0.964016	0.560347	0.854077	0.939538	0.932544	0.294448	0.915294	0.491708	0.882947	0.68228	0.994453
FALSE	High	MGEGGGAAPAASGGLASHPLYYYSTHNALR	[K].MGEGGGAAPAASGGLASHPLYYYSTHNALR.[A]	1xTMTpro [N-Term]; 3xPhospho [S12(99.3); S24(100); T25(100)]	1xTMTpro [N-Term]; 3xPhospho [S12(99.3); S17(0.7); Y21(0); Y22(0); Y23(0); S24(100); T25(100)]	5.97299e-09	5.34993e-05	1	1	1	TGGT1_276170-t26_1-p1	TGGT1_276170-t26_1-p1 [6-35]	TGGT1_276170-t26_1-p1 3xPhospho [S17(99.3); S22(0.7); Y26(0); Y27(0); Y28(0); S29(100); T30(100)]	TGGT1_276170-t26_1-p1 3xPhospho [S17(99.3); S29(100); T30(100)]	transcript=TGGT1_276170-t26_1 | gene=TGGT1_276170 | organism=Toxoplasma_gondii_GT1 | gene_product=PI3K/PI4K domain-containing protein [Source:UniProtKB/TrEMBL;Acc:S7VW73] | transcript_product=phosphatidylinositol 3- and 4-kinase | location=TGGT1_chrIII:84006-93774(+) | protein_length=1228 | sequence_SO=chromosome | SO=protein_coding_gene | is_pseudo=false	0	3520.51	30
FALSE	High	MGGSDDEEEVLSTEAVR	[R].MGGSDDEEEVLSTEAVR.[E]	1xTMTpro [N-Term]; 1xPhospho [S4(100)]	1xTMTpro [N-Term]; 1xPhospho [S4(100); S12(0); T13(0)]	1.87489e-08	5.34993e-05	1	1	3	TGGT1_223800-t26_1-p1	TGGT1_223800-t26_1-p1 [504-520]	TGGT1_223800-t26_1-p1 1xPhospho [S507(100); S515(0); T516(0)]	TGGT1_223800-t26_1-p1 1xPhospho [S507(100)]	transcript=TGGT1_223800-t26_1 | gene=TGGT1_223800 | organism=Toxoplasma_gondii_GT1 | gene_product=Folate_rec domain-containing protein [Source:UniProtKB/TrEMBL;Acc:S7WBZ3] | transcript_product=hypothetical protein | location=TGGT1_chrX:3470121-3474892(+) | protein_length=526 | sequence_SO=chromosome | SO=protein_coding_gene | is_pseudo=false	0	2207.97	17
FALSE	High	MGGSDDEEEVLSTEAVR	[R].MGGSDDEEEVLSTEAVR.[E]	1xOxidation [M1]; 1xTMTpro [N-Term]; 1xPhospho [S4(100)]	1xOxidation [M1]; 1xTMTpro [N-Term]; 1xPhospho [S4(100); S12(0); T13(0)]	1.75885e-12	5.34993e-05	1	1	8	TGGT1_223800-t26_1-p1	TGGT1_223800-t26_1-p1 [504-520]	TGGT1_223800-t26_1-p1 1xPhospho [S507(100); S515(0); T516(0)]	TGGT1_223800-t26_1-p1 1xPhospho [S507(100)]	transcript=TGGT1_223800-t26_1 | gene=TGGT1_223800 | organism=Toxoplasma_gondii_GT1 | gene_product=Folate_rec domain-containing protein [Source:UniProtKB/TrEMBL;Acc:S7WBZ3] | transcript_product=hypothetical protein | location=TGGT1_chrX:3470121-3474892(+) | protein_length=526 | sequence_SO=chromosome | SO=protein_coding_gene | is_pseudo=false	0	2223.96	17
FALSE	High	MGPSDISTHVR	[R].MGPSDISTHVR.[G]	1xTMTpro [N-Term]; 1xPhospho [S7(100)]	1xTMTpro [N-Term]; 1xPhospho [S4(0); S7(100); T8(0)]	1.18871e-07	5.34993e-05	1	1	5	TGGT1_254720-t26_1-p1	TGGT1_254720-t26_1-p1 [195-205]	TGGT1_254720-t26_1-p1 1xPhospho [S198(0); S201(100); T202(0)]	TGGT1_254720-t26_1-p1 1xPhospho [S201(100)]	transcript=TGGT1_254720-t26_1 | gene=TGGT1_254720 | organism=Toxoplasma_gondii_GT1 | gene_product=Dense granule protein GRA8 [Source:UniProtKB/TrEMBL;Acc:A0A125YYI5] | transcript_product=dense granule protein GRA8 | location=TGGT1_chrIII:1884681-1885484(+) | protein_length=267 | sequence_SO=chromosome | SO=protein_coding_gene | is_pseudo=false	0	1583.76	11	1.139	1.213	1.058	1.051	1.197	1.275	1.112	1.162	1.26	1.239	0.19	0.28	0.08	0.07	0.26	0.35	0.15	0.22	0.33	0.31	0.25019	0.362392	0.668856	0.671331	0.425392	0.0913486	0.0595221	0.33229	0.0756298	0.318092	0.900211
FALSE	High	MGPSDISTHVR	[R].MGPSDISTHVR.[G]	1xOxidation [M1]; 1xTMTpro [N-Term]; 1xPhospho [S/T]	1xOxidation [M1]; 1xTMTpro [N-Term]; 1xPhospho [S4(0); S7(50); T8(50)]	1.53885e-07	5.34993e-05	1	1	16	TGGT1_254720-t26_1-p1	TGGT1_254720-t26_1-p1 [195-205]			transcript=TGGT1_254720-t26_1 | gene=TGGT1_254720 | organism=Toxoplasma_gondii_GT1 | gene_product=Dense granule protein GRA8 [Source:UniProtKB/TrEMBL;Acc:A0A125YYI5] | transcript_product=dense granule protein GRA8 | location=TGGT1_chrIII:1884681-1885484(+) | protein_length=267 | sequence_SO=chromosome | SO=protein_coding_gene | is_pseudo=false	0	1599.75	11	0.993	0.964	0.994	1.02	1.012	0.983	1.014	1.054	1.029	1.041	-0.01	-0.05	-0.01	0.03	0.02	-0.02	0.02	0.08	0.04	0.06	0.720711	0.591755	0.696718	0.870692	0.902969	0.774892	0.920084	0.585398	0.756663	0.14538	0.959114
FALSE	High	MGPSDISTHVR	[R].MGPSDISTHVR.[G]	1xTMTpro [N-Term]; 2xPhospho [S7(100); T8(100)]	1xTMTpro [N-Term]; 2xPhospho [S4(0); S7(100); T8(100)]	3.92898e-07	5.34993e-05	1	1	11	TGGT1_254720-t26_1-p1	TGGT1_254720-t26_1-p1 [195-205]	TGGT1_254720-t26_1-p1 2xPhospho [S198(0); S201(100); T202(100)]	TGGT1_254720-t26_1-p1 2xPhospho [S201(100); T202(100)]	transcript=TGGT1_254720-t26_1 | gene=TGGT1_254720 | organism=Toxoplasma_gondii_GT1 | gene_product=Dense granule protein GRA8 [Source:UniProtKB/TrEMBL;Acc:A0A125YYI5] | transcript_product=dense granule protein GRA8 | location=TGGT1_chrIII:1884681-1885484(+) | protein_length=267 | sequence_SO=chromosome | SO=protein_coding_gene | is_pseudo=false	0	1663.72	11	0.855	1.045	0.997	1.053	0.9	1.1	1.049	1.071	1.071	1.211	-0.23	0.06	0	0.07	-0.15	0.14	0.07	0.1	0.1	0.28	0.283168	0.777985	0.989079	0.49415	0.554536	0.676557	0.874752	0.662073	0.853356	0.162404	0.904439
FALSE	High	MGPSDISTHVR	[R].MGPSDISTHVR.[G]	1xOxidation [M1]; 1xTMTpro [N-Term]; 2xPhospho [S7(100); T8(100)]	1xOxidation [M1]; 1xTMTpro [N-Term]; 2xPhospho [S4(0); S7(100); T8(100)]	0.00036835	5.34993e-05	1	1	3	TGGT1_254720-t26_1-p1	TGGT1_254720-t26_1-p1 [195-205]	TGGT1_254720-t26_1-p1 2xPhospho [S198(0); S201(100); T202(100)]	TGGT1_254720-t26_1-p1 2xPhospho [S201(100); T202(100)]	transcript=TGGT1_254720-t26_1 | gene=TGGT1_254720 | organism=Toxoplasma_gondii_GT1 | gene_product=Dense granule protein GRA8 [Source:UniProtKB/TrEMBL;Acc:A0A125YYI5] | transcript_product=dense granule protein GRA8 | location=TGGT1_chrIII:1884681-1885484(+) | protein_length=267 | sequence_SO=chromosome | SO=protein_coding_gene | is_pseudo=false	0	1679.72	11	0.827	0.835	0.78	0.911	0.754	0.761	0.71	0.966	0.924	1.042	-0.27	-0.26	-0.36	-0.13	-0.41	-0.39	-0.49	-0.05	-0.11	0.06	0.406791	0.352834	0.0585538	0.575242	0.472282	0.445007	0.249206	0.908381	0.792591	0.744148	0.910719
FALSE	High	MGQGEGDDDDSRGGR	[R].MGQGEGDDDDSRGGR.[R]	1xTMTpro [N-Term]; 1xPhospho [S11(100)]	1xTMTpro [N-Term]; 1xPhospho [S11(100)]	4.58847e-05	5.34993e-05	1	1	1	TGGT1_280660-t26_1-p1	TGGT1_280660-t26_1-p1 [8336-8350]	TGGT1_280660-t26_1-p1 1xPhospho [S8346(100)]	TGGT1_280660-t26_1-p1 1xPhospho [S8346(100)]	transcript=TGGT1_280660-t26_1 | gene=TGGT1_280660 | organism=Toxoplasma_gondii_GT1 | gene_product=HECT domain-containing protein [Source:UniProtKB/TrEMBL;Acc:S7UUN0] | transcript_product=HECT-domain (ubiquitin-transferase) domain-containing protein | location=TGGT1_chrVIIa:173679-235804(-) | protein_length=17226 | sequence_SO=chromosome | SO=protein_coding_gene | is_pseudo=false	1	1935.78	15
FALSE	High	MGSMGNYVAQPEGGMEIPTQYDYSQLQQQVSR	[R].MGSMGNYVAQPEGGMEIPTQYDYSQLQQQVSR.[E]	1xTMTpro [N-Term]; 1xPhospho [S3(100)]	1xTMTpro [N-Term]; 1xPhospho [S3(100); Y7(0); T19(0); Y21(0); Y23(0); S24(0); S31(0)]	1.55227e-10	5.34993e-05	1	1	2	TGGT1_219270-t26_1-p1	TGGT1_219270-t26_1-p1 [346-377]	TGGT1_219270-t26_1-p1 1xPhospho [S348(100); Y352(0); T364(0); Y366(0); Y368(0); S369(0); S376(0)]	TGGT1_219270-t26_1-p1 1xPhospho [S348(100)]	transcript=TGGT1_219270-t26_1 | gene=TGGT1_219270 | organism=Toxoplasma_gondii_GT1 | gene_product=Multi-pass transmembrane protein [Source:UniProtKB/TrEMBL;Acc:A0A125YRY2] | transcript_product=multi-pass transmembrane protein | location=TGGT1_chrXII:948336-949904(+) | protein_length=389 | sequence_SO=chromosome | SO=protein_coding_gene | is_pseudo=false	0	3976.79	32
FALSE	High	MGSMGNYVAQPEGGMEIPTQYDYSQLQQQVSR	[R].MGSMGNYVAQPEGGMEIPTQYDYSQLQQQVSR.[E]	2xOxidation [M4; M15]; 1xTMTpro [N-Term]; 1xPhospho [S3(100)]	2xOxidation [M4; M15]; 1xTMTpro [N-Term]; 1xPhospho [S3(100); Y7(0); T19(0); Y21(0); Y23(0); S24(0); S31(0)]	6.18369e-10	5.34993e-05	1	1	4	TGGT1_219270-t26_1-p1	TGGT1_219270-t26_1-p1 [346-377]	TGGT1_219270-t26_1-p1 1xPhospho [S348(100); Y352(0); T364(0); Y366(0); Y368(0); S369(0); S376(0)]	TGGT1_219270-t26_1-p1 1xPhospho [S348(100)]	transcript=TGGT1_219270-t26_1 | gene=TGGT1_219270 | organism=Toxoplasma_gondii_GT1 | gene_product=Multi-pass transmembrane protein [Source:UniProtKB/TrEMBL;Acc:A0A125YRY2] | transcript_product=multi-pass transmembrane protein | location=TGGT1_chrXII:948336-949904(+) | protein_length=389 | sequence_SO=chromosome | SO=protein_coding_gene | is_pseudo=false	0	4008.78	32	0.913	0.993	1.156	0.906	0.827	0.9	1.047	1.152	0.925	0.984	-0.13	-0.01	0.21	-0.14	-0.27	-0.15	0.07	0.2	-0.11	-0.02	0.342382	0.972896	0.693942	0.744261	0.481549	0.410066	0.490808	0.342457	0.395314	0.861775	0.9065
FALSE	High	MGSTLEGEESVLESGVPVPSR	[K].MGSTLEGEESVLESGVPVPSR.[K]	1xOxidation [M1]; 1xTMTpro [N-Term]; 1xPhospho [S10(100)]	1xOxidation [M1]; 1xTMTpro [N-Term]; 1xPhospho [S3(0); T4(0); S10(100); S14(0); S20(0)]	1.09793e-07	5.34993e-05	1	1	2	TGGT1_297730-t26_1-p1	TGGT1_297730-t26_1-p1 [92-112]	TGGT1_297730-t26_1-p1 1xPhospho [S94(0); T95(0); S101(100); S105(0); S111(0)]	TGGT1_297730-t26_1-p1 1xPhospho [S101(100)]	transcript=TGGT1_297730-t26_1 | gene=TGGT1_297730 | organism=Toxoplasma_gondii_GT1 | gene_product=Transcription elongation factor 1 homolog [Source:UniProtKB/TrEMBL;Acc:A0A125YVV4] | transcript_product=putative transcription elongation factor 1 | location=TGGT1_chrII:1935013-1936221(-) | protein_length=226 | sequence_SO=chromosome | SO=protein_coding_gene | is_pseudo=false	0	2560.22	21
FALSE	High	MHADEGHSPSR	[K].MHADEGHSPSR.[R]	1xTMTpro [N-Term]; 1xPhospho [S8(100)]	1xTMTpro [N-Term]; 1xPhospho [S8(100); S10(0)]	5.91489e-07	5.34993e-05	1	1	2	TGGT1_236850-t26_1-p1	TGGT1_236850-t26_1-p1 [866-876]	TGGT1_236850-t26_1-p1 1xPhospho [S873(100); S875(0)]	TGGT1_236850-t26_1-p1 1xPhospho [S873(100)]	transcript=TGGT1_236850-t26_1 | gene=TGGT1_236850 | organism=Toxoplasma_gondii_GT1 | gene_product=hypothetical protein | transcript_product=hypothetical protein | location=TGGT1_chrX:5428985-5438773(+) | protein_length=2752 | sequence_SO=chromosome | SO=protein_coding_gene | is_pseudo=false	0	1607.7	11
FALSE	High	MFWKDESLFEGEDDEELLSD	[R].MFWKDESLFEGEDDEELLSD.[-]	1xTMTpro [K4]; 1xTMTpro [N-Term]; 1xPhospho [S19(100)]	1xTMTpro [K4]; 1xTMTpro [N-Term]; 1xPhospho [S7(0); S19(100)]	2.6883e-09	5.34993e-05	1	1	1	TGGT1_208750-t26_1-p1	TGGT1_208750-t26_1-p1 [249-268]	TGGT1_208750-t26_1-p1 1xPhospho [S255(0); S267(100)]	TGGT1_208750-t26_1-p1 1xPhospho [S267(100)]	transcript=TGGT1_208750-t26_1 | gene=TGGT1_208750 | organism=Toxoplasma_gondii_GT1 | gene_product=RWD domain-containing protein [Source:UniProtKB/TrEMBL;Acc:S7UJH2] | transcript_product=RWD domain-containing protein | location=TGGT1_chrIb:861884-864672(+) | protein_length=268 | sequence_SO=chromosome | SO=protein_coding_gene | is_pseudo=false	1	3122.41	20
FALSE	High	MHAIDAKPQCLLVSPTSR	[R].MHAIDAKPQCLLVSPTSR.[D]	1xOxidation [M1]; 1xMethylthio [C10]; 1xTMTpro [K7]; 1xTMTpro [N-Term]; 1xPhospho [S14(99.7)]	1xOxidation [M1]; 1xMethylthio [C10]; 1xTMTpro [K7]; 1xTMTpro [N-Term]; 1xPhospho [S14(99.7); T16(0.3); S17(0)]	0.000318987	5.34993e-05	1	1	2	TGGT1_306540-t26_1-p1	TGGT1_306540-t26_1-p1 [277-294]	TGGT1_306540-t26_1-p1 1xMethylthio [C286]; 1xPhospho [S290(99.7); T292(0.3); S293(0)]	TGGT1_306540-t26_1-p1 1xMethylthio [C286]; 1xPhospho [S290(99.7)]	transcript=TGGT1_306540-t26_1 | gene=TGGT1_306540 | organism=Toxoplasma_gondii_GT1 | gene_product=Phosphotransferase enzyme family protein [Source:UniProtKB/TrEMBL;Acc:A0A125YUJ4] | transcript_product=phosphotransferase enzyme family protein | location=TGGT1_chrIX:5946997-5952108(+) | protein_length=547 | sequence_SO=chromosome | SO=protein_coding_gene | is_pseudo=false	0	2717.38	18
FALSE	High	MHEICLTLSPSASPR	[R].MHEICLTLSPSASPR.[L]	1xMethylthio [C5]; 1xTMTpro [N-Term]; 1xPhospho [S9(99.8)]	1xMethylthio [C5]; 1xTMTpro [N-Term]; 1xPhospho [T7(0.2); S9(99.8); S11(0); S13(0)]	8.9468e-10	5.34993e-05	1	1	3	TGGT1_276890-t26_1-p1	TGGT1_276890-t26_1-p1 [1135-1149]	TGGT1_276890-t26_1-p1 1xMethylthio [C1139]; 1xPhospho [T1141(0.2); S1143(99.8); S1145(0); S1147(0)]	TGGT1_276890-t26_1-p1 1xMethylthio [C1139]; 1xPhospho [S1143(99.8)]	transcript=TGGT1_276890-t26_1 | gene=TGGT1_276890 | organism=Toxoplasma_gondii_GT1 | gene_product=hypothetical protein | transcript_product=hypothetical protein | location=TGGT1_chrXII:6781886-6789601(-) | protein_length=1174 | sequence_SO=chromosome | SO=protein_coding_gene | is_pseudo=false	0	2071.97	15	0.886	0.912	1.122	1.159	1.027	1.057	1.301	1.115	1.222	1.307	-0.18	-0.13	0.17	0.21	0.04	0.08	0.38	0.16	0.29	0.39	0.690018	0.616291	0.108831	0.542874	0.734103	0.357934	0.396843	0.725059	0.175065	0.116542	0.95308
FALSE	High	MHEICLTLSPSASPR	[R].MHEICLTLSPSASPR.[L]	1xOxidation [M1]; 1xMethylthio [C5]; 1xTMTpro [N-Term]; 1xPhospho [S9(100)]	1xOxidation [M1]; 1xMethylthio [C5]; 1xTMTpro [N-Term]; 1xPhospho [T7(0); S9(100); S11(0); S13(0)]	1.15946e-08	5.34993e-05	1	1	2	TGGT1_276890-t26_1-p1	TGGT1_276890-t26_1-p1 [1135-1149]	TGGT1_276890-t26_1-p1 1xMethylthio [C1139]; 1xPhospho [T1141(0); S1143(100); S1145(0); S1147(0)]	TGGT1_276890-t26_1-p1 1xMethylthio [C1139]; 1xPhospho [S1143(100)]	transcript=TGGT1_276890-t26_1 | gene=TGGT1_276890 | organism=Toxoplasma_gondii_GT1 | gene_product=hypothetical protein | transcript_product=hypothetical protein | location=TGGT1_chrXII:6781886-6789601(-) | protein_length=1174 | sequence_SO=chromosome | SO=protein_coding_gene | is_pseudo=false	0	2087.96	15
FALSE	High	MHGGEQAPSRDETQQGVEQR	[R].MHGGEQAPSRDETQQGVEQR.[L]	1xTMTpro [N-Term]; 1xPhospho [S9(99.5)]	1xTMTpro [N-Term]; 1xPhospho [S9(99.5); T13(0.5)]	3.49105e-06	5.34993e-05	1	1	1	TGGT1_209000-t26_1-p1	TGGT1_209000-t26_1-p1 [10542-10561]	TGGT1_209000-t26_1-p1 1xPhospho [S10550(99.5); T10554(0.5)]	TGGT1_209000-t26_1-p1 1xPhospho [S10550(99.5)]	transcript=TGGT1_209000-t26_1 | gene=TGGT1_209000 | organism=Toxoplasma_gondii_GT1 | gene_product=HECT-domain (Ubiquitin-transferase) domain-containing protein [Source:UniProtKB/TrEMBL;Acc:S7UJI8] | transcript_product=HECT-domain (ubiquitin-transferase) domain-containing protein | location=TGGT1_chrIb:956370-995183(-) | protein_length=12302 | sequence_SO=chromosome | SO=protein_coding_gene | is_p…	1	2624.18	20
FALSE	High	MHHAGSGSFGSR	[R].MHHAGSGSFGSR.[A]	1xTMTpro [N-Term]; 1xPhospho [S6(99.7)]	1xTMTpro [N-Term]; 1xPhospho [S6(99.7); S8(0.4); S11(0)]	0.000379963	5.34993e-05	1	1	7	TGGT1_265310-t26_1-p1	TGGT1_265310-t26_1-p1 [141-152]	TGGT1_265310-t26_1-p1 1xPhospho [S146(99.7); S148(0.4); S151(0)]	TGGT1_265310-t26_1-p1 1xPhospho [S146(99.7)]	transcript=TGGT1_265310-t26_1 | gene=TGGT1_265310 | organism=Toxoplasma_gondii_GT1 | gene_product=J domain-containing protein [Source:UniProtKB/TrEMBL;Acc:A0A125YIC5] | transcript_product=putative heat shock protein 40 | location=TGGT1_chrIX:1440716-1446749(+) | protein_length=336 | sequence_SO=chromosome | SO=protein_coding_gene | is_pseudo=false	0	1614.72	12
FALSE	High	MHHAGSGSFGSR	[R].MHHAGSGSFGSR.[A]	1xTMTpro [N-Term]; 2xPhospho [S6(100); S8(100)]	1xTMTpro [N-Term]; 2xPhospho [S6(100); S8(100); S11(0)]	0.000127834	5.34993e-05	1	1	8	TGGT1_265310-t26_1-p1	TGGT1_265310-t26_1-p1 [141-152]	TGGT1_265310-t26_1-p1 2xPhospho [S146(100); S148(100); S151(0)]	TGGT1_265310-t26_1-p1 2xPhospho [S146(100); S148(100)]	transcript=TGGT1_265310-t26_1 | gene=TGGT1_265310 | organism=Toxoplasma_gondii_GT1 | gene_product=J domain-containing protein [Source:UniProtKB/TrEMBL;Acc:A0A125YIC5] | transcript_product=putative heat shock protein 40 | location=TGGT1_chrIX:1440716-1446749(+) | protein_length=336 | sequence_SO=chromosome | SO=protein_coding_gene | is_pseudo=false	0	1694.68	12	0.79	0.941	1.991	1.084	0.856	1.02	2.158	1.025	1.916	2.353	-0.34	-0.09	0.99	0.12	-0.22	0.03	1.11	0.03	0.94	1.23	0.145988	0.854148	0.480837	0.894707	0.778466	0.943083	0.13442	0.92493	0.0851986	0.0571461	0.8946
FALSE	High	MHHAGSGSFGSR	[R].MHHAGSGSFGSR.[A]	1xOxidation [M1]; 1xTMTpro [N-Term]; 2xPhospho [S6(100); S8(100)]	1xOxidation [M1]; 1xTMTpro [N-Term]; 2xPhospho [S6(100); S8(100); S11(0)]	0.000289356	5.34993e-05	1	1	8	TGGT1_265310-t26_1-p1	TGGT1_265310-t26_1-p1 [141-152]	TGGT1_265310-t26_1-p1 2xPhospho [S146(100); S148(100); S151(0)]	TGGT1_265310-t26_1-p1 2xPhospho [S146(100); S148(100)]	transcript=TGGT1_265310-t26_1 | gene=TGGT1_265310 | organism=Toxoplasma_gondii_GT1 | gene_product=J domain-containing protein [Source:UniProtKB/TrEMBL;Acc:A0A125YIC5] | transcript_product=putative heat shock protein 40 | location=TGGT1_chrIX:1440716-1446749(+) | protein_length=336 | sequence_SO=chromosome | SO=protein_coding_gene | is_pseudo=false	0	1710.68	12
FALSE	High	MHSSASASFAQDR	[R].MHSSASASFAQDR.[K]	1xTMTpro [N-Term]; 1xPhospho [S8(100)]	1xTMTpro [N-Term]; 1xPhospho [S3(0); S4(0); S6(0); S8(100)]	4.30651e-05	5.34993e-05	1	1	4	TGGT1_254420-t26_1-p1	TGGT1_254420-t26_1-p1 [378-390]	TGGT1_254420-t26_1-p1 1xPhospho [S380(0); S381(0); S383(0); S385(100)]	TGGT1_254420-t26_1-p1 1xPhospho [S385(100)]	transcript=TGGT1_254420-t26_1 | gene=TGGT1_254420 | organism=Toxoplasma_gondii_GT1 | gene_product=Phospholipase, patatin family protein [Source:UniProtKB/TrEMBL;Acc:S7VVK9] | transcript_product=phospholipase, patatin family protein | location=TGGT1_chrIII:1703961-1713345(+) | protein_length=1173 | sequence_SO=chromosome | SO=protein_coding_gene | is_pseudo=false	0	1778.79	13
FALSE	High	MHSSASASFAQDR	[R].MHSSASASFAQDR.[K]	1xTMTpro [N-Term]; 2xPhospho [S3(100); S6(99.6)]	1xTMTpro [N-Term]; 2xPhospho [S3(100); S4(0.4); S6(99.6); S8(0)]	2.65462e-05	5.34993e-05	1	1	6	TGGT1_254420-t26_1-p1	TGGT1_254420-t26_1-p1 [378-390]	TGGT1_254420-t26_1-p1 2xPhospho [S380(100); S381(0.4); S383(99.6); S385(0)]	TGGT1_254420-t26_1-p1 2xPhospho [S380(100); S383(99.6)]	transcript=TGGT1_254420-t26_1 | gene=TGGT1_254420 | organism=Toxoplasma_gondii_GT1 | gene_product=Phospholipase, patatin family protein [Source:UniProtKB/TrEMBL;Acc:S7VVK9] | transcript_product=phospholipase, patatin family protein | location=TGGT1_chrIII:1703961-1713345(+) | protein_length=1173 | sequence_SO=chromosome | SO=protein_coding_gene | is_pseudo=false	0	1858.75	13
FALSE	High	MHSSASASFAQDR	[R].MHSSASASFAQDR.[K]	1xOxidation [M1]; 1xTMTpro [N-Term]; 2xPhospho [S3(100); S6(100)]	1xOxidation [M1]; 1xTMTpro [N-Term]; 2xPhospho [S3(100); S4(0); S6(100); S8(0)]	0.000271826	5.34993e-05	1	1	3	TGGT1_254420-t26_1-p1	TGGT1_254420-t26_1-p1 [378-390]	TGGT1_254420-t26_1-p1 2xPhospho [S380(100); S381(0); S383(100); S385(0)]	TGGT1_254420-t26_1-p1 2xPhospho [S380(100); S383(100)]	transcript=TGGT1_254420-t26_1 | gene=TGGT1_254420 | organism=Toxoplasma_gondii_GT1 | gene_product=Phospholipase, patatin family protein [Source:UniProtKB/TrEMBL;Acc:S7VVK9] | transcript_product=phospholipase, patatin family protein | location=TGGT1_chrIII:1703961-1713345(+) | protein_length=1173 | sequence_SO=chromosome | SO=protein_coding_gene | is_pseudo=false	0	1874.75	13	0.88	1.098	0.99	1.017	0.894	1.116	1.007	0.861	0.972	1.183	-0.19	0.13	-0.01	0.02	-0.16	0.16	0.01	-0.22	-0.04	0.24	0.278344	0.727495	0.893675	0.778957	0.482884	0.736685	0.960782	0.565558	0.922284	0.0443613	0.904439
FALSE	High	MHVAVVSAK	[K].MHVAVVSAK.[M]	1xTMTpro [K9]; 1xTMTpro [N-Term]; 1xPhospho [S7(100)]	1xTMTpro [K9]; 1xTMTpro [N-Term]; 1xPhospho [S7(100)]	7.20726e-05	5.34993e-05	1	1	2	TGGT1_318150-t26_1-p1	TGGT1_318150-t26_1-p1 [32-40]	TGGT1_318150-t26_1-p1 1xPhospho [S38(100)]	TGGT1_318150-t26_1-p1 1xPhospho [S38(100)]	transcript=TGGT1_318150-t26_1 | gene=TGGT1_318150 | organism=Toxoplasma_gondii_GT1 | gene_product=Transporter, major facilitator family protein [Source:UniProtKB/TrEMBL;Acc:A0A125YLF4] | transcript_product=transporter, major facilitator family protein | location=TGGT1_chrIV:1463434-1465233(+) | protein_length=599 | sequence_SO=chromosome | SO=protein_coding_gene | is_pseudo=false	0	1629.9	9
FALSE	High	MHVAVVSAK	[K].MHVAVVSAK.[M]	1xOxidation [M1]; 1xTMTpro [K9]; 1xTMTpro [N-Term]; 1xPhospho [S7(100)]	1xOxidation [M1]; 1xTMTpro [K9]; 1xTMTpro [N-Term]; 1xPhospho [S7(100)]	7.92529e-05	5.34993e-05	1	1	3	TGGT1_318150-t26_1-p1	TGGT1_318150-t26_1-p1 [32-40]	TGGT1_318150-t26_1-p1 1xPhospho [S38(100)]	TGGT1_318150-t26_1-p1 1xPhospho [S38(100)]	transcript=TGGT1_318150-t26_1 | gene=TGGT1_318150 | organism=Toxoplasma_gondii_GT1 | gene_product=Transporter, major facilitator family protein [Source:UniProtKB/TrEMBL;Acc:A0A125YLF4] | transcript_product=transporter, major facilitator family protein | location=TGGT1_chrIV:1463434-1465233(+) | protein_length=599 | sequence_SO=chromosome | SO=protein_coding_gene | is_pseudo=false	0	1645.9	9	2.038	3.976	2.342	0.845	1.722	3.361	1.979	1.66	3.95	2.691	1.03	1.99	1.23	-0.24	0.78	1.75	0.98	0.73	1.98	1.43	0.46213	0.357694	0.545639	0.786329	0.170764	0.196562	0.402567	0.202284	0.124471	0.270007	0.91769
FALSE	High	MKEDGDDSEEEEEELSINLGSMR	[R].MKEDGDDSEEEEEELSINLGSMR.[L]	1xTMTpro [K2]; 1xTMTpro [N-Term]; 1xPhospho [S8(100)]	1xTMTpro [K2]; 1xTMTpro [N-Term]; 1xPhospho [S8(100); S16(0); S21(0)]	6.30512e-16	5.34993e-05	1	1	17	TGGT1_234310-t26_1-p1	TGGT1_234310-t26_1-p1 [78-100]	TGGT1_234310-t26_1-p1 1xPhospho [S85(100); S93(0); S98(0)]	TGGT1_234310-t26_1-p1 1xPhospho [S85(100)]	transcript=TGGT1_234310-t26_1 | gene=TGGT1_234310 | organism=Toxoplasma_gondii_GT1 | gene_product=PP28 domain-containing protein [Source:UniProtKB/TrEMBL;Acc:S7UVT4] | transcript_product=hypothetical protein | location=TGGT1_chrX:4195728-4198221(+) | protein_length=176 | sequence_SO=chromosome | SO=protein_coding_gene | is_pseudo=false	1	3330.49	23	0.955	0.924	0.937	0.983	0.939	0.908	0.922	0.91	0.792	0.829	-0.07	-0.11	-0.09	-0.02	-0.09	-0.14	-0.12	-0.14	-0.34	-0.27	0.424753	0.38951	0.526387	0.837247	0.270732	0.056691	0.0464871	0.0513628	0.107624	0.14883	0.911502
FALSE	High	MHEGDEGPGHHHKPGLGEGTP	[K].MHEGDEGPGHHHKPGLGEGTP.[-]	1xTMTpro [K13]; 1xTMTpro [N-Term]; 1xPhospho [T20(100)]	1xTMTpro [K13]; 1xTMTpro [N-Term]; 1xPhospho [T20(100)]	9.49613e-06	5.34993e-05	1	1	1	P06702	P06702 [94-114]	P06702 1xPhospho [T113(100)]	P06702 1xPhospho [T113(100)]	Protein S100-A9 OS=Homo sapiens (Human) OX=9606 GN=S100A9 PE=1 SV=1	0	2864.34	21
FALSE	High	MFSYIDTHR	[R].MFSYIDTHR.[H]	1xTMTpro [N-Term]; 1xPhospho [T7(100)]	1xTMTpro [N-Term]; 1xPhospho [S3(0); Y4(0); T7(100)]	0.000142758	5.34993e-05	1	1	3	TGGT1_232250-t26_1-p1	TGGT1_232250-t26_1-p1 [344-352]	TGGT1_232250-t26_1-p1 1xPhospho [S346(0); Y347(0); T350(100)]	TGGT1_232250-t26_1-p1 1xPhospho [T350(100)]	transcript=TGGT1_232250-t26_1 | gene=TGGT1_232250 | organism=Toxoplasma_gondii_GT1 | gene_product=Catalase [Source:UniProtKB/TrEMBL;Acc:S7V3B9] | transcript_product=catalase | location=TGGT1_chrVIII:1969434-1975537(-) | protein_length=502 | sequence_SO=chromosome | SO=protein_coding_gene | is_pseudo=false	0	1553.71	9	1.155	1.02	0.83	1.081	1.248	1.102	0.897	0.92	0.851	0.749	0.21	0.03	-0.27	0.11	0.32	0.14	-0.16	-0.12	-0.23	-0.42	0.390925	0.779555	0.278516	0.768157	0.599826	0.629552	0.772431	0.783641	0.203147	0.376085	0.909509
FALSE	High	MFSSPTKPASVR	[R].MFSSPTKPASVR.[T]	1xOxidation [M1]; 1xTMTpro [K7]; 1xTMTpro [N-Term]; 1xPhospho [S3(100)]	1xOxidation [M1]; 1xTMTpro [K7]; 1xTMTpro [N-Term]; 1xPhospho [S3(100); S4(0); T6(0); S10(0)]	2.24714e-05	5.34993e-05	1	1	17	TGGT1_221180-t26_1-p1	TGGT1_221180-t26_1-p1 [752-763]	TGGT1_221180-t26_1-p1 1xPhospho [S754(100); S755(0); T757(0); S761(0)]	TGGT1_221180-t26_1-p1 1xPhospho [S754(100)]	transcript=TGGT1_221180-t26_1 | gene=TGGT1_221180 | organism=Toxoplasma_gondii_GT1 | gene_product=hypothetical protein | transcript_product=hypothetical protein | location=TGGT1_chrII:92416-97666(-) | protein_length=791 | sequence_SO=chromosome | SO=protein_coding_gene | is_pseudo=false	0	2012.05	12	0.792	0.724	0.619	0.867	0.687	0.627	0.536	0.896	0.911	0.833	-0.34	-0.47	-0.69	-0.21	-0.54	-0.67	-0.9	-0.16	-0.13	-0.26	0.294587	0.312776	0.170568	0.0888095	0.159271	0.201702	0.112945	0.263547	0.553439	0.122988	0.904778
FALSE	High	MFSSPTKPASVR	[R].MFSSPTKPASVR.[T]	1xTMTpro [K7]; 1xTMTpro [N-Term]; 1xPhospho [S10(100)]	1xTMTpro [K7]; 1xTMTpro [N-Term]; 1xPhospho [S3(0); S4(0); T6(0); S10(100)]	0.00043174	5.34993e-05	1	1	7	TGGT1_221180-t26_1-p1	TGGT1_221180-t26_1-p1 [752-763]	TGGT1_221180-t26_1-p1 1xPhospho [S754(0); S755(0); T757(0); S761(100)]	TGGT1_221180-t26_1-p1 1xPhospho [S761(100)]	transcript=TGGT1_221180-t26_1 | gene=TGGT1_221180 | organism=Toxoplasma_gondii_GT1 | gene_product=hypothetical protein | transcript_product=hypothetical protein | location=TGGT1_chrII:92416-97666(-) | protein_length=791 | sequence_SO=chromosome | SO=protein_coding_gene | is_pseudo=false	0	1996.06	12	0.659	0.502	0.348	0.927	0.611	0.465	0.323	0.677	0.579	0.441	-0.6	-0.99	-1.52	-0.11	-0.71	-1.1	-1.63	-0.56	-0.79	-1.18	0.390339	0.319611	0.253407	0.0104668	0.340799	0.291591	0.237429	0.179267	0.412802	0.121629	0.909509
FALSE	High	MDGEGHGDESLR	[R].MDGEGHGDESLR.[E]	1xTMTpro [N-Term]; 1xPhospho [S10(100)]	1xTMTpro [N-Term]; 1xPhospho [S10(100)]	9.38369e-06	5.34993e-05	1	1	1	TGGT1_241880-t26_1-p1	TGGT1_241880-t26_1-p1 [672-683]	TGGT1_241880-t26_1-p1 1xPhospho [S681(100)]	TGGT1_241880-t26_1-p1 1xPhospho [S681(100)]	transcript=TGGT1_241880-t26_1 | gene=TGGT1_241880 | organism=Toxoplasma_gondii_GT1 | gene_product=Phosphodiesterase [Source:UniProtKB/TrEMBL;Acc:S7USB2] | transcript_product=3'5'-cyclic nucleotide phosphodiesterase domain-containing protein | location=TGGT1_chrVI:1724772-1737127(-) | protein_length=1281 | sequence_SO=chromosome | SO=protein_coding_gene | is_pseudo=false	0	1686.71	12	0.94	0.796	0.815	1.01	0.949	0.803	0.823	1.004	1.023	0.744	-0.09	-0.33	-0.29	0.01	-0.08	-0.32	-0.28	0.01	0.03	-0.43	0.647131	0.124588	0.333145	0.862925	0.524075	0.00462108	0.231683	0.845881	0.0134758	0.00812465	0.947964
FALSE	High	MDGEGHGDESLRENLMDIIGAR	[R].MDGEGHGDESLRENLMDIIGAR.[S]	1xTMTpro [N-Term]; 1xPhospho [S10(100)]	1xTMTpro [N-Term]; 1xPhospho [S10(100)]	0.000361268	5.34993e-05	1	1	1	TGGT1_241880-t26_1-p1	TGGT1_241880-t26_1-p1 [672-693]	TGGT1_241880-t26_1-p1 1xPhospho [S681(100)]	TGGT1_241880-t26_1-p1 1xPhospho [S681(100)]	transcript=TGGT1_241880-t26_1 | gene=TGGT1_241880 | organism=Toxoplasma_gondii_GT1 | gene_product=Phosphodiesterase [Source:UniProtKB/TrEMBL;Acc:S7USB2] | transcript_product=3'5'-cyclic nucleotide phosphodiesterase domain-containing protein | location=TGGT1_chrVI:1724772-1737127(-) | protein_length=1281 | sequence_SO=chromosome | SO=protein_coding_gene | is_pseudo=false	1	2799.28	22
FALSE	High	MDSCNYSEDR	[K-].MDSCNYSEDR.[F]	1xMethylthio [C4]; 1xTMTpro [N-Term]	1xMethylthio [C4]; 1xTMTpro [N-Term]	9.58187e-05	5.34993e-05	1	4	2	TGGT1_286420A-t26_1-p1	TGGT1_286420A-t26_1-p1 [155-164]	TGGT1_286420A-t26_1-p1 1xMethylthio [C158]	TGGT1_286420A-t26_1-p1 1xMethylthio [C158]	transcript=TGGT1_286420A-t26_1 | gene=TGGT1_286420A | organism=Toxoplasma_gondii_GT1 | gene_product=Elongation factor 1-alpha [Source:UniProtKB/TrEMBL;Acc:S7W358] | transcript_product=putative elongation factor 1-alpha (EF-1-ALPHA) | location=TGGT1_chrV:1692242-1694172(-) | protein_length=448 | sequence_SO=chromosome | SO=protein_coding_gene | is_pseudo=false	0	1569.63	10	0.689	0.782	0.797	1.199	0.827	0.937	0.956	1	0.997	0.88	-0.54	-0.36	-0.33	0.26	-0.27	-0.09	-0.06	0	0	-0.18	0.0368643	0.228325	0.174375	0.363277	0.399217	0.226791	0.551394	0.993426	0.989208	0.223336	0.8946
FALSE	High	MDSCNYSEDR	[K-].MDSCNYSEDR.[F]	1xOxidation [M1]; 1xMethylthio [C4]; 1xTMTpro [N-Term]	1xOxidation [M1]; 1xMethylthio [C4]; 1xTMTpro [N-Term]	6.15454e-07	5.34993e-05	1	4	4	TGGT1_286420A-t26_1-p1	TGGT1_286420A-t26_1-p1 [155-164]	TGGT1_286420A-t26_1-p1 1xMethylthio [C158]	TGGT1_286420A-t26_1-p1 1xMethylthio [C158]	transcript=TGGT1_286420A-t26_1 | gene=TGGT1_286420A | organism=Toxoplasma_gondii_GT1 | gene_product=Elongation factor 1-alpha [Source:UniProtKB/TrEMBL;Acc:S7W358] | transcript_product=putative elongation factor 1-alpha (EF-1-ALPHA) | location=TGGT1_chrV:1692242-1694172(-) | protein_length=448 | sequence_SO=chromosome | SO=protein_coding_gene | is_pseudo=false	0	1585.63	10	0.889	0.852	0.853	0.931	0.828	0.793	0.794	0.955	0.671	0.787	-0.17	-0.23	-0.23	-0.1	-0.27	-0.33	-0.33	-0.07	-0.58	-0.35	0.204154	0.281317	0.581934	0.125411	0.174976	0.236153	0.486208	0.0338472	0.406245	0.138737	0.900211
FALSE	High	MDSIAAADAAIR	[K].MDSIAAADAAIR.[G]	1xTMTpro [N-Term]; 1xPhospho [S3(100)]	1xTMTpro [N-Term]; 1xPhospho [S3(100)]	0.000100076	5.34993e-05	1	1	2	TGGT1_321500-t26_1-p1	TGGT1_321500-t26_1-p1 [85-96]	TGGT1_321500-t26_1-p1 1xPhospho [S87(100)]	TGGT1_321500-t26_1-p1 1xPhospho [S87(100)]	transcript=TGGT1_321500-t26_1 | gene=TGGT1_321500 | organism=Toxoplasma_gondii_GT1 | gene_product=RNA recognition motif-containing protein [Source:UniProtKB/TrEMBL;Acc:A0A125YP61] | transcript_product=RNA recognition motif-containing protein | location=TGGT1_chrIb:1771014-1773404(+) | protein_length=475 | sequence_SO=chromosome | SO=protein_coding_gene | is_pseudo=false	0	1588.77	12
FALSE	High	MEAVANQGK	[K].MEAVANQGK.[A]	1xOxidation [M1]; 1xTMTpro [K9]; 1xTMTpro [N-Term]	1xOxidation [M1]; 1xTMTpro [K9]; 1xTMTpro [N-Term]	0.000358473	5.34993e-05	1	1	1	TGGT1_297060-t26_1-p1	TGGT1_297060-t26_1-p1 [329-337]			transcript=TGGT1_297060-t26_1 | gene=TGGT1_297060 | organism=Toxoplasma_gondii_GT1 | gene_product=Phosphoglycerate mutase [Source:UniProtKB/TrEMBL;Acc:S7UKZ1] | transcript_product=phosphoglycerate mutase PGMII | location=TGGT1_chrII:1486715-1490594(-) | protein_length=339 | sequence_SO=chromosome | SO=protein_coding_gene | is_pseudo=false	0	1571.87	9
FALSE	High	MEAVDISEAEK	[R].MEAVDISEAEK.[Y]	1xTMTpro [K11]; 1xTMTpro [N-Term]	1xTMTpro [K11]; 1xTMTpro [N-Term]	0.000387402	5.34993e-05	1	1	1	TGGT1_290670-t26_1-p1	TGGT1_290670-t26_1-p1 [249-259]			transcript=TGGT1_290670-t26_1 | gene=TGGT1_290670 | organism=Toxoplasma_gondii_GT1 | gene_product=CYTOSOL_AP domain-containing protein [Source:UniProtKB/TrEMBL;Acc:S7UP88] | transcript_product=leucyl aminopeptidase LAP | location=TGGT1_chrIX:3637150-3642271(+) | protein_length=781 | sequence_SO=chromosome | SO=protein_coding_gene | is_pseudo=false	0	1829.98	11	0.848	0.766	0.96	1.094	0.927	0.838	1.05	0.879	1.008	1.001	-0.24	-0.38	-0.06	0.13	-0.11	-0.26	0.07	-0.19	0.01	0	0.139019	0.507319	0.913788	0.701186	0.685843	0.316566	0.759357	0.665043	0.90336	0.992796	0.8946
FALSE	High	MEDCASLGGRVSDSEDPESPCTK	[K].MEDCASLGGRVSDSEDPESPCTK.[E]	2xMethylthio [C4; C21]; 1xTMTpro [K23]; 1xTMTpro [N-Term]; 1xPhospho [S12(99.5)]	2xMethylthio [C4; C21]; 1xTMTpro [K23]; 1xTMTpro [N-Term]; 1xPhospho [S6(0.5); S12(99.5); S14(0); S19(0); T22(0)]	6.93335e-07	5.34993e-05	1	1	1	TGGT1_243460-t26_1-p1	TGGT1_243460-t26_1-p1 [237-259]	TGGT1_243460-t26_1-p1 2xMethylthio [C240; C257]; 1xPhospho [S242(0.5); S248(99.5); S250(0); S255(0); T258(0)]	TGGT1_243460-t26_1-p1 2xMethylthio [C240; C257]; 1xPhospho [S248(99.5)]	transcript=TGGT1_243460-t26_1 | gene=TGGT1_243460 | organism=Toxoplasma_gondii_GT1 | gene_product=hypothetical protein | transcript_product=hypothetical protein | location=TGGT1_chrVI:2564580-2571836(-) | protein_length=2011 | sequence_SO=chromosome | SO=protein_coding_gene | is_pseudo=false	1	3193.35	23	1.307	0.92	0.974	0.955	1.249	0.879	0.931	0.887	0.855	0.908	0.39	-0.12	-0.04	-0.07	0.32	-0.19	-0.1	-0.17	-0.23	-0.14	0.224648	0.326828	0.537887	0.802289	0.52627	0.407913	0.640641	0.566219	0.439784	0.575028	0.900211
FALSE	High	MEDGELGGLHSEGK	[R].MEDGELGGLHSEGK.[D]	1xTMTpro [K14]; 1xTMTpro [N-Term]; 1xPhospho [S11(100)]	1xTMTpro [K14]; 1xTMTpro [N-Term]; 1xPhospho [S11(100)]	1.25532e-08	5.34993e-05	1	1	2	TGGT1_313020-t26_1-p1	TGGT1_313020-t26_1-p1 [44-57]	TGGT1_313020-t26_1-p1 1xPhospho [S54(100)]	TGGT1_313020-t26_1-p1 1xPhospho [S54(100)]	transcript=TGGT1_313020-t26_1 | gene=TGGT1_313020 | organism=Toxoplasma_gondii_GT1 | gene_product=STAS domain-containing protein [Source:UniProtKB/TrEMBL;Acc:S7UTK8] | transcript_product=STAS domain-containing protein | location=TGGT1_chrXI:3003249-3012926(+) | protein_length=1120 | sequence_SO=chromosome | SO=protein_coding_gene | is_pseudo=false	0	2147.03	14
FALSE	High	MEELESEVEKENER	[K].MEELESEVEKENER.[R]	1xTMTpro [K10]; 1xTMTpro [N-Term]; 1xPhospho [S6(100)]	1xTMTpro [K10]; 1xTMTpro [N-Term]; 1xPhospho [S6(100)]	7.84832e-06	5.34993e-05	1	1	3	TGGT1_290630-t26_1-p1	TGGT1_290630-t26_1-p1 [1501-1514]	TGGT1_290630-t26_1-p1 1xPhospho [S1506(100)]	TGGT1_290630-t26_1-p1 1xPhospho [S1506(100)]	transcript=TGGT1_290630-t26_1 | gene=TGGT1_290630 | organism=Toxoplasma_gondii_GT1 | gene_product=AP2/ERF domain-containing protein [Source:UniProtKB/TrEMBL;Acc:S7UP83] | transcript_product=AP2 domain transcription factor AP2IX-7 | location=TGGT1_chrIX:3593432-3601897(+) | protein_length=2671 | sequence_SO=chromosome | SO=protein_coding_gene | is_pseudo=false	1	2439.16	14	0.953	0.744	0.819	0.959	0.914	0.714	0.785	0.889	0.827	0.744	-0.07	-0.43	-0.29	-0.06	-0.13	-0.49	-0.35	-0.17	-0.27	-0.43	0.68323	0.368061	0.0204449	0.707997	0.027853	0.438115	0.198438	0.45042	0.0991449	0.33655	0.952274
FALSE	High	MEELESEVEKENER	[K].MEELESEVEKENER.[R]	1xOxidation [M1]; 1xTMTpro [K10]; 1xTMTpro [N-Term]; 1xPhospho [S6(100)]	1xOxidation [M1]; 1xTMTpro [K10]; 1xTMTpro [N-Term]; 1xPhospho [S6(100)]	0.000155684	5.34993e-05	1	1	1	TGGT1_290630-t26_1-p1	TGGT1_290630-t26_1-p1 [1501-1514]	TGGT1_290630-t26_1-p1 1xPhospho [S1506(100)]	TGGT1_290630-t26_1-p1 1xPhospho [S1506(100)]	transcript=TGGT1_290630-t26_1 | gene=TGGT1_290630 | organism=Toxoplasma_gondii_GT1 | gene_product=AP2/ERF domain-containing protein [Source:UniProtKB/TrEMBL;Acc:S7UP83] | transcript_product=AP2 domain transcription factor AP2IX-7 | location=TGGT1_chrIX:3593432-3601897(+) | protein_length=2671 | sequence_SO=chromosome | SO=protein_coding_gene | is_pseudo=false	1	2455.16	14
FALSE	High	MEELVHNIR	[K].MEELVHNIR.[T]	1xTMTpro [N-Term]	1xTMTpro [N-Term]	1.04871e-05	5.34993e-05	1	1	2	TGGT1_205470-t26_1-p1	TGGT1_205470-t26_1-p1 [805-813]			transcript=TGGT1_205470-t26_1 | gene=TGGT1_205470 | organism=Toxoplasma_gondii_GT1 | gene_product=Tr-type G domain-containing protein [Source:UniProtKB/TrEMBL;Acc:A0A125YJ59] | transcript_product=putative translation elongation factor 2 family protein | location=TGGT1_chrVIIa:1297616-1301283(+) | protein_length=832 | sequence_SO=chromosome | SO=protein_coding_gene | is_pseudo=false	0	1444.79	9
FALSE	High	MEFSIANTPAPDEAGESTPR	[R].MEFSIANTPAPDEAGESTPR.[I]	1xTMTpro [N-Term]; 1xPhospho [S/T]	1xTMTpro [N-Term]; 1xPhospho [S4(0); T8(0); S17(50); T18(50)]	5.43392e-12	5.34993e-05	1	1	1	TGGT1_206540-t26_1-p1	TGGT1_206540-t26_1-p1 [1131-1150]			transcript=TGGT1_206540-t26_1 | gene=TGGT1_206540 | organism=Toxoplasma_gondii_GT1 | gene_product=hypothetical protein | transcript_product=hypothetical protein | location=TGGT1_chrVIIa:869335-877145(-) | protein_length=1295 | sequence_SO=chromosome | SO=protein_coding_gene | is_pseudo=false	0	2504.13	20	1.152	0.883	0.917	1.003	1.155	0.885	0.919	0.948	0.854	0.751	0.2	-0.18	-0.13	0	0.21	-0.18	-0.12	-0.08	-0.23	-0.41	0.559428	0.307225	0.033379	0.934217	0.501393	0.198625	0.220995	0.81077	0.496285	0.10388	0.933386
FALSE	High	MEFSIANTPAPDEAGESTPR	[R].MEFSIANTPAPDEAGESTPR.[I]	1xOxidation [M1]; 1xTMTpro [N-Term]; 1xPhospho [S/T]	1xOxidation [M1]; 1xTMTpro [N-Term]; 1xPhospho [S4(0); T8(0); S17(50); T18(50)]	7.32226e-05	5.34993e-05	1	1	2	TGGT1_206540-t26_1-p1	TGGT1_206540-t26_1-p1 [1131-1150]			transcript=TGGT1_206540-t26_1 | gene=TGGT1_206540 | organism=Toxoplasma_gondii_GT1 | gene_product=hypothetical protein | transcript_product=hypothetical protein | location=TGGT1_chrVIIa:869335-877145(-) | protein_length=1295 | sequence_SO=chromosome | SO=protein_coding_gene | is_pseudo=false	0	2520.13	20
FALSE	High	MEHCEDDEGEETDEDEASTEAAAVDFR	[R].MEHCEDDEGEETDEDEASTEAAAVDFR.[V]	1xMethylthio [C4]; 1xTMTpro [N-Term]; 1xPhospho [T12(100)]	1xMethylthio [C4]; 1xTMTpro [N-Term]; 1xPhospho [T12(100); S18(0); T19(0)]	6.30512e-16	5.34993e-05	1	1	4	TGGT1_206380-t26_1-p1	TGGT1_206380-t26_1-p1 [2111-2137]	TGGT1_206380-t26_1-p1 1xMethylthio [C2114]; 1xPhospho [T2122(100); S2128(0); T2129(0)]	TGGT1_206380-t26_1-p1 1xMethylthio [C2114]; 1xPhospho [T2122(100)]	transcript=TGGT1_206380-t26_1 | gene=TGGT1_206380 | organism=Toxoplasma_gondii_GT1 | gene_product=hypothetical protein | transcript_product=hypothetical protein | location=TGGT1_chrVIIa:1008034-1018085(+) | protein_length=2455 | sequence_SO=chromosome | SO=protein_coding_gene | is_pseudo=false	0	3460.3	27
FALSE	High	MEHCEDDEGEETDEDEASTEAAAVDFR	[R].MEHCEDDEGEETDEDEASTEAAAVDFR.[V]	1xOxidation [M1]; 1xMethylthio [C4]; 1xTMTpro [N-Term]; 1xPhospho [T12(100)]	1xOxidation [M1]; 1xMethylthio [C4]; 1xTMTpro [N-Term]; 1xPhospho [T12(100); S18(0); T19(0)]	4.04139e-14	5.34993e-05	1	1	6	TGGT1_206380-t26_1-p1	TGGT1_206380-t26_1-p1 [2111-2137]	TGGT1_206380-t26_1-p1 1xMethylthio [C2114]; 1xPhospho [T2122(100); S2128(0); T2129(0)]	TGGT1_206380-t26_1-p1 1xMethylthio [C2114]; 1xPhospho [T2122(100)]	transcript=TGGT1_206380-t26_1 | gene=TGGT1_206380 | organism=Toxoplasma_gondii_GT1 | gene_product=hypothetical protein | transcript_product=hypothetical protein | location=TGGT1_chrVIIa:1008034-1018085(+) | protein_length=2455 | sequence_SO=chromosome | SO=protein_coding_gene | is_pseudo=false	0	3476.29	27
FALSE	High	MELNSSPSVPLTR	[R].MELNSSPSVPLTR.[G]	1xTMTpro [N-Term]; 1xPhospho [S8(100)]	1xTMTpro [N-Term]; 1xPhospho [S5(0); S6(0); S8(100); T12(0)]	3.78696e-08	5.34993e-05	1	1	8	TGGT1_214320-t26_1-p1	TGGT1_214320-t26_1-p1 [519-531]	TGGT1_214320-t26_1-p1 1xPhospho [S523(0); S524(0); S526(100); T530(0)]	TGGT1_214320-t26_1-p1 1xPhospho [S526(100)]	transcript=TGGT1_214320-t26_1 | gene=TGGT1_214320 | organism=Toxoplasma_gondii_GT1 | gene_product=MFS domain-containing protein [Source:UniProtKB/TrEMBL;Acc:A0A125YKB0] | transcript_product=facilitative glucose transporter GT1 | location=TGGT1_chrX:6138702-6140408(+) | protein_length=568 | sequence_SO=chromosome | SO=protein_coding_gene | is_pseudo=false	0	1814.9	13	0.981	1.247	1.301	1.345	1.32	1.677	1.75	1.22	1.596	1.875	-0.03	0.32	0.38	0.43	0.4	0.75	0.81	0.29	0.67	0.91	0.931428	0.525847	0.534607	0.284681	0.0756662	0.118449	0.168379	0.147038	0.0744114	0.16393	0.990782
FALSE	High	MELNSSPSVPLTR	[R].MELNSSPSVPLTR.[G]	1xOxidation [M1]; 1xTMTpro [N-Term]; 1xPhospho [S8(100)]	1xOxidation [M1]; 1xTMTpro [N-Term]; 1xPhospho [S5(0); S6(0); S8(100); T12(0)]	2.11598e-10	5.34993e-05	1	1	28	TGGT1_214320-t26_1-p1	TGGT1_214320-t26_1-p1 [519-531]	TGGT1_214320-t26_1-p1 1xPhospho [S523(0); S524(0); S526(100); T530(0)]	TGGT1_214320-t26_1-p1 1xPhospho [S526(100)]	transcript=TGGT1_214320-t26_1 | gene=TGGT1_214320 | organism=Toxoplasma_gondii_GT1 | gene_product=MFS domain-containing protein [Source:UniProtKB/TrEMBL;Acc:A0A125YKB0] | transcript_product=facilitative glucose transporter GT1 | location=TGGT1_chrX:6138702-6140408(+) | protein_length=568 | sequence_SO=chromosome | SO=protein_coding_gene | is_pseudo=false	0	1830.9	13	0.904	1.238	1.263	1.221	1.105	1.511	1.543	1.084	1.427	1.68	-0.14	0.31	0.34	0.29	0.14	0.6	0.63	0.12	0.51	0.75	0.583312	0.540254	0.58384	0.289455	0.204333	0.213772	0.283753	0.475324	0.135367	0.290239	0.935421
FALSE	High	MELNSSPSVPLTR	[R].MELNSSPSVPLTR.[G]	1xTMTpro [N-Term]; 2xPhospho [S5(100); S8(100)]	1xTMTpro [N-Term]; 2xPhospho [S5(100); S6(0); S8(100); T12(0)]	1.30461e-05	5.34993e-05	1	1	3	TGGT1_214320-t26_1-p1	TGGT1_214320-t26_1-p1 [519-531]	TGGT1_214320-t26_1-p1 2xPhospho [S523(100); S524(0); S526(100); T530(0)]	TGGT1_214320-t26_1-p1 2xPhospho [S523(100); S526(100)]	transcript=TGGT1_214320-t26_1 | gene=TGGT1_214320 | organism=Toxoplasma_gondii_GT1 | gene_product=MFS domain-containing protein [Source:UniProtKB/TrEMBL;Acc:A0A125YKB0] | transcript_product=facilitative glucose transporter GT1 | location=TGGT1_chrX:6138702-6140408(+) | protein_length=568 | sequence_SO=chromosome | SO=protein_coding_gene | is_pseudo=false	0	1894.87	13
FALSE	High	MESEGGADDSAEEGDLLDDDDNEDR	[K].MESEGGADDSAEEGDLLDDDDNEDR.[G]	1xTMTpro [N-Term]; 1xPhospho [S10(100)]	1xTMTpro [N-Term]; 1xPhospho [S3(0); S10(100)]	1.72612e-11	5.34993e-05	1	1	2	P07910	P07910 [251-275]	P07910 1xPhospho [S253(0); S260(100)]	P07910 1xPhospho [S260(100)]	Heterogeneous nuclear ribonucleoproteins C1/C2 OS=Homo sapiens (Human) OX=9606 GN=HNRNPC PE=1 SV=4	0	3083.18	25
FALSE	High	METNHSGPEAAR	[-].METNHSGPEAAR.[S]	1xAcetyl [N-Term]; 1xTMTpro [N-Term]; 1xPhospho [S6(100)]	1xAcetyl [N-Term]; 1xTMTpro [N-Term]; 1xPhospho [T3(0); S6(100)]	0.000172461	5.34993e-05	1	1	4	TGGT1_209850-t26_1-p1	TGGT1_209850-t26_1-p1 [1-12]	TGGT1_209850-t26_1-p1 1xAcetyl [N-Term]; 1xPhospho [T3(0); S6(100)]	TGGT1_209850-t26_1-p1 1xAcetyl [N-Term]; 1xPhospho [S6(100)]	transcript=TGGT1_209850-t26_1 | gene=TGGT1_209850 | organism=Toxoplasma_gondii_GT1 | gene_product=RNA recognition motif-containing protein [Source:UniProtKB/TrEMBL;Acc:S7UJA3] | transcript_product=RNA recognition motif-containing protein | location=TGGT1_chrIb:1501964-1507671(-) | protein_length=1412 | sequence_SO=chromosome | SO=protein_coding_gene | is_pseudo=false	0	1725.76	12
FALSE	High	MEVDRSPGLPMSDLK	[R].MEVDRSPGLPMSDLK.[T]	1xTMTpro [K15]; 1xTMTpro [N-Term]; 1xPhospho [S6(100)]	1xTMTpro [K15]; 1xTMTpro [N-Term]; 1xPhospho [S6(100); S12(0)]	1.03552e-06	5.34993e-05	1	1	1	Q6WCQ1	Q6WCQ1 [614-628]	Q6WCQ1 1xPhospho [S619(100); S625(0)]	Q6WCQ1 1xPhospho [S619(100)]	Myosin phosphatase Rho-interacting protein OS=Homo sapiens (Human) OX=9606 GN=MPRIP PE=1 SV=3	1	2363.2	15	0.937	0.92	1.013	0.99	0.928	0.91	1.003	0.969	0.948	1.115	-0.09	-0.12	0.02	-0.02	-0.11	-0.14	0	-0.05	-0.08	0.16	0.484618	0.769951	0.909613	0.910202	0.676754	0.803285	0.90742	0.757524	0.82435	0.261397	0.919786
FALSE	High	MFAFSEPAVIDKEEENLSGK	[R].MFAFSEPAVIDKEEENLSGK.[Q]	1xOxidation [M1]; 2xTMTpro [K12; K20]; 1xTMTpro [N-Term]; 1xPhospho [S18(100)]	1xOxidation [M1]; 2xTMTpro [K12; K20]; 1xTMTpro [N-Term]; 1xPhospho [S5(0); S18(100)]	3.29435e-12	5.34993e-05	1	1	1	TGGT1_284780-t26_1-p1	TGGT1_284780-t26_1-p1 [1341-1360]	TGGT1_284780-t26_1-p1 1xPhospho [S1345(0); S1358(100)]	TGGT1_284780-t26_1-p1 1xPhospho [S1358(100)]	transcript=TGGT1_284780-t26_1 | gene=TGGT1_284780 | organism=Toxoplasma_gondii_GT1 | gene_product=hypothetical protein | transcript_product=hypothetical protein | location=TGGT1_chrV:2466672-2473545(+) | protein_length=1600 | sequence_SO=chromosome | SO=protein_coding_gene | is_pseudo=false	1	3249.66	20	1.04	0.832	1.031	0.953	0.991	0.793	0.982	1.072	0.865	0.849	0.06	-0.26	0.04	-0.07	-0.01	-0.33	-0.03	0.1	-0.21	-0.24	0.790347	0.0756561	0.911497	0.643426	0.969816	0.148872	0.921108	0.391716	0.268562	0.0182344	0.971714
FALSE	High	MFFGGDDDFGPFGSVGMGSHSNFPFR	[R].MFFGGDDDFGPFGSVGMGSHSNFPFR.[M]	2xOxidation [M1; M17]; 1xTMTpro [N-Term]; 1xPhospho [S19(100)]	2xOxidation [M1; M17]; 1xTMTpro [N-Term]; 1xPhospho [S14(0); S19(100); S21(0)]	6.30512e-16	5.34993e-05	1	1	1	TGGT1_265310-t26_1-p1	TGGT1_265310-t26_1-p1 [115-140]	TGGT1_265310-t26_1-p1 1xPhospho [S128(0); S133(100); S135(0)]	TGGT1_265310-t26_1-p1 1xPhospho [S133(100)]	transcript=TGGT1_265310-t26_1 | gene=TGGT1_265310 | organism=Toxoplasma_gondii_GT1 | gene_product=J domain-containing protein [Source:UniProtKB/TrEMBL;Acc:A0A125YIC5] | transcript_product=putative heat shock protein 40 | location=TGGT1_chrIX:1440716-1446749(+) | protein_length=336 | sequence_SO=chromosome | SO=protein_coding_gene | is_pseudo=false	0	3228.36	26	0.587	1.943	1.333	0.937	0.55	1.821	1.249	2.969	8.93	6.527	-0.77	0.96	0.41	-0.09	-0.86	0.86	0.32	1.57	3.16	2.71	0.164549	0.138205	0.769357	0.717678	0.00436697	0.281051	0.844901	0.055185	0.0891618	0.208672	0.895983
FALSE	High	MFGTLLADTESDEEESNQR	[K].MFGTLLADTESDEEESNQR.[T]	1xTMTpro [N-Term]; 1xPhospho [S11(100)]	1xTMTpro [N-Term]; 1xPhospho [T4(0); T9(0); S11(100); S16(0)]	1.42133e-07	5.34993e-05	1	1	1	TGGT1_262420-t26_1-p1	TGGT1_262420-t26_1-p1 [896-914]	TGGT1_262420-t26_1-p1 1xPhospho [T899(0); T904(0); S906(100); S911(0)]	TGGT1_262420-t26_1-p1 1xPhospho [S906(100)]	transcript=TGGT1_262420-t26_1 | gene=TGGT1_262420 | organism=Toxoplasma_gondii_GT1 | gene_product=AP2 domain transcription factor APVIIb-1/ADA2-B [Source:UniProtKB/TrEMBL;Acc:S7UY04] | transcript_product=AP2 domain transcription factor APVIIb-1/ADA2-B | location=TGGT1_chrVIIb:1237509-1248391(-) | protein_length=2728 | sequence_SO=chromosome | SO=protein_coding_gene | is_pseudo=false	0	2556.11	19
FALSE	High	MFNPYFPQPVGSAEPPSASEEER	[R].MFNPYFPQPVGSAEPPSASEEER.[E]	1xTMTpro [N-Term]; 2xPhospho [S17(100); S19(100)]	1xTMTpro [N-Term]; 2xPhospho [Y5(0); S12(0); S17(100); S19(100)]	2.55094e-06	5.34993e-05	1	1	1	TGGT1_262130-t26_1-p1	TGGT1_262130-t26_1-p1 [221-243]	TGGT1_262130-t26_1-p1 2xPhospho [Y225(0); S232(0); S237(100); S239(100)]	TGGT1_262130-t26_1-p1 2xPhospho [S237(100); S239(100)]	transcript=TGGT1_262130-t26_1 | gene=TGGT1_262130 | organism=Toxoplasma_gondii_GT1 | gene_product=hypothetical protein | transcript_product=hypothetical protein | location=TGGT1_chrVIIb:1327288-1332580(-) | protein_length=782 | sequence_SO=chromosome | SO=protein_coding_gene | is_pseudo=false	0	3030.3	23
FALSE	High	MFSLGWPERPNSSFESLGGLAGR	[R].MFSLGWPERPNSSFESLGGLAGR.[R]	1xOxidation [M1]; 1xTMTpro [N-Term]; 1xPhospho [S]	1xOxidation [M1]; 1xTMTpro [N-Term]; 1xPhospho [S3(0); S12(50); S13(50); S16(0)]	9.92883e-05	5.34993e-05	1	1	1	TGGT1_264090-t26_1-p1	TGGT1_264090-t26_1-p1 [2028-2050]			transcript=TGGT1_264090-t26_1 | gene=TGGT1_264090 | organism=Toxoplasma_gondii_GT1 | gene_product=hypothetical protein | transcript_product=hypothetical protein | location=TGGT1_chrVIIb:158774-174140(+) | protein_length=2986 | sequence_SO=chromosome | SO=protein_coding_gene | is_pseudo=false	0	2895.38	23	0.774	0.833	0.686	1.243	0.963	1.036	0.853	0.989	0.784	1.019	-0.37	-0.26	-0.54	0.31	-0.05	0.05	-0.23	-0.02	-0.35	0.03	0.0944494	0.496199	0.206126	0.216487	0.797752	0.792673	0.191718	0.853851	0.438722	0.896339	0.8946
FALSE	High	MKEDGDDSEEEEEELSINLGSMR	[R].MKEDGDDSEEEEEELSINLGSMR.[L]	1xOxidation [M]; 1xTMTpro [K2]; 1xTMTpro [N-Term]; 1xPhospho [S8(100)]	1xOxidation [M1; M22]; 1xTMTpro [K2]; 1xTMTpro [N-Term]; 1xPhospho [S8(100); S16(0); S21(0)]	1.6493e-14	5.34993e-05	1	1	18	TGGT1_234310-t26_1-p1	TGGT1_234310-t26_1-p1 [78-100]	TGGT1_234310-t26_1-p1 1xPhospho [S85(100); S93(0); S98(0)]	TGGT1_234310-t26_1-p1 1xPhospho [S85(100)]	transcript=TGGT1_234310-t26_1 | gene=TGGT1_234310 | organism=Toxoplasma_gondii_GT1 | gene_product=PP28 domain-containing protein [Source:UniProtKB/TrEMBL;Acc:S7UVT4] | transcript_product=hypothetical protein | location=TGGT1_chrX:4195728-4198221(+) | protein_length=176 | sequence_SO=chromosome | SO=protein_coding_gene | is_pseudo=false	1	3346.48	23	0.956	0.927	0.975	1.001	0.956	0.927	0.976	0.971	0.899	0.893	-0.07	-0.11	-0.04	0	-0.06	-0.11	-0.03	-0.04	-0.15	-0.16	0.273995	0.0635651	0.600008	0.972301	0.454789	0.0858928	0.379623	0.333422	0.179243	0.20605	0.904439
FALSE	High	MDELAQMPSQPSTEDLLR	[R].MDELAQMPSQPSTEDLLR.[S]	1xOxidation [M]; 1xTMTpro [N-Term]; 1xPhospho [S12(99.7)]	1xOxidation [M1; M7]; 1xTMTpro [N-Term]; 1xPhospho [S9(0); S12(99.7); T13(0.3)]	4.27854e-09	5.34993e-05	1	1	2	TGGT1_212980-t26_1-p1	TGGT1_212980-t26_1-p1 [135-152]	TGGT1_212980-t26_1-p1 1xPhospho [S143(0); S146(99.7); T147(0.3)]	TGGT1_212980-t26_1-p1 1xPhospho [S146(99.7)]	transcript=TGGT1_212980-t26_1 | gene=TGGT1_212980 | organism=Toxoplasma_gondii_GT1 | gene_product=hypothetical protein | transcript_product=hypothetical protein | location=TGGT1_chrV:617528-620094(-) | protein_length=715 | sequence_SO=chromosome | SO=protein_coding_gene | is_pseudo=false	0	2461.13	18	1.074	0.891	1.122	1.116	1.198	0.995	1.252	1.078	1.182	1.627	0.1	-0.17	0.17	0.16	0.26	-0.01	0.32	0.11	0.24	0.7	0.914838	0.785654	0.849605	0.871932	0.0403897	0.984174	0.171489	0.019765	0.701855	0.0921218	0.988561
FALSE	High	MKEDGDDSEEEEEELSINLGSMR	[R].MKEDGDDSEEEEEELSINLGSMR.[L]	2xOxidation [M1; M22]; 1xTMTpro [K2]; 1xTMTpro [N-Term]; 1xPhospho [S8(100)]	2xOxidation [M1; M22]; 1xTMTpro [K2]; 1xTMTpro [N-Term]; 1xPhospho [S8(100); S16(0); S21(0)]	3.93191e-10	5.34993e-05	1	1	2	TGGT1_234310-t26_1-p1	TGGT1_234310-t26_1-p1 [78-100]	TGGT1_234310-t26_1-p1 1xPhospho [S85(100); S93(0); S98(0)]	TGGT1_234310-t26_1-p1 1xPhospho [S85(100)]	transcript=TGGT1_234310-t26_1 | gene=TGGT1_234310 | organism=Toxoplasma_gondii_GT1 | gene_product=PP28 domain-containing protein [Source:UniProtKB/TrEMBL;Acc:S7UVT4] | transcript_product=hypothetical protein | location=TGGT1_chrX:4195728-4198221(+) | protein_length=176 | sequence_SO=chromosome | SO=protein_coding_gene | is_pseudo=false	1	3362.48	23	0.713	0.684	0.797	1.219	0.869	0.833	0.972	1.018	0.766	0.9	-0.49	-0.55	-0.33	0.29	-0.2	-0.26	-0.04	0.03	-0.38	-0.15	0.0444293	0.0530511	0.264404	0.0536728	0.178231	0.165427	0.787293	0.836651	0.000997832	0.413844	0.8946
FALSE	High	MLDSPLYEEERPEENASEQSPASEK	[R].MLDSPLYEEERPEENASEQSPASEK.[Q]	1xTMTpro [K25]; 1xTMTpro [N-Term]; 1xPhospho [S17(100)]	1xTMTpro [K25]; 1xTMTpro [N-Term]; 1xPhospho [S4(0); Y7(0); S17(100); S20(0); S23(0)]	2.80024e-08	5.34993e-05	1	1	3	TGGT1_311920-t26_1-p1	TGGT1_311920-t26_1-p1 [2003-2027]	TGGT1_311920-t26_1-p1 1xPhospho [S2006(0); Y2009(0); S2019(100); S2022(0); S2025(0)]	TGGT1_311920-t26_1-p1 1xPhospho [S2019(100)]	transcript=TGGT1_311920-t26_1 | gene=TGGT1_311920 | organism=Toxoplasma_gondii_GT1 | gene_product=GRAM domain-containing protein [Source:UniProtKB/TrEMBL;Acc:S7UTV3] | transcript_product=GRAM domain-containing protein | location=TGGT1_chrXI:2336545-2355556(+) | protein_length=2528 | sequence_SO=chromosome | SO=protein_coding_gene | is_pseudo=false	0	3553.65	25	1.075	1.081	0.949	1.031	1.108	1.114	0.979	1.181	1.003	1.119	0.1	0.11	-0.07	0.04	0.15	0.16	-0.03	0.24	0	0.16	0.334035	0.203368	0.705441	0.812428	0.33079	0.549365	0.933796	0.442585	0.98955	0.623666	0.9065
FALSE	High	MPSDGDRDAQDSDR	[R].MPSDGDRDAQDSDR.[W]	1xTMTpro [N-Term]; 1xPhospho [S3(100)]	1xTMTpro [N-Term]; 1xPhospho [S3(100); S12(0)]	0.000291624	5.34993e-05	1	1	3	TGGT1_232780-t26_1-p1	TGGT1_232780-t26_1-p1 [650-663]	TGGT1_232780-t26_1-p1 1xPhospho [S652(100); S661(0)]	TGGT1_232780-t26_1-p1 1xPhospho [S652(100)]	transcript=TGGT1_232780-t26_1 | gene=TGGT1_232780 | organism=Toxoplasma_gondii_GT1 | gene_product=hypothetical protein | transcript_product=hypothetical protein | location=TGGT1_chrVIII:2255308-2260311(-) | protein_length=713 | sequence_SO=chromosome | SO=protein_coding_gene | is_pseudo=false	1	1948.8	14	1.071	0.858	0.793	0.873	0.935	0.749	0.692	0.801	0.943	1.011	0.1	-0.22	-0.33	-0.2	-0.1	-0.42	-0.53	-0.32	-0.08	0.02	0.755192	0.113616	0.288966	0.0127535	0.764849	0.0666192	0.185627	0.232447	0.108781	0.7406	0.96275
FALSE	High	MQAEHLMLQWSEDEGSLK	[R].MQAEHLMLQWSEDEGSLK.[N]	1xOxidation [M1]; 1xTMTpro [K18]; 1xTMTpro [N-Term]; 1xPhospho [S11(100)]	1xOxidation [M1]; 1xTMTpro [K18]; 1xTMTpro [N-Term]; 1xPhospho [S11(100); S16(0)]	1.58682e-08	5.34993e-05	1	1	2	TGGT1_254300-t26_1-p1	TGGT1_254300-t26_1-p1 [278-295]	TGGT1_254300-t26_1-p1 1xPhospho [S288(100); S293(0)]	TGGT1_254300-t26_1-p1 1xPhospho [S288(100)]	transcript=TGGT1_254300-t26_1 | gene=TGGT1_254300 | organism=Toxoplasma_gondii_GT1 | gene_product=hypothetical protein | transcript_product=hypothetical protein | location=TGGT1_chrIII:1566444-1577118(+) | protein_length=1776 | sequence_SO=chromosome | SO=protein_coding_gene | is_pseudo=false	0	2836.35	18	1.016	1.019	1.013	0.998	1.014	1.017	1.011	0.985	1.058	0.942	0.02	0.03	0.02	0	0.02	0.02	0.02	-0.02	0.08	-0.09	0.626641	0.752314	0.916577	0.990889	0.91755	0.884248	0.827012	0.302704	0.252147	0.57972	0.945062
FALSE	High	MQDELFGDAPSSPR	[R].MQDELFGDAPSSPR.[A]	1xTMTpro [N-Term]; 1xPhospho [S12(99.8)]	1xTMTpro [N-Term]; 1xPhospho [S11(0.2); S12(99.8)]	2.63329e-06	5.34993e-05	1	1	3	TGGT1_309240-t26_1-p1	TGGT1_309240-t26_1-p1 [440-453]	TGGT1_309240-t26_1-p1 1xPhospho [S450(0.2); S451(99.8)]	TGGT1_309240-t26_1-p1 1xPhospho [S451(99.8)]	transcript=TGGT1_309240-t26_1 | gene=TGGT1_309240 | organism=Toxoplasma_gondii_GT1 | gene_product=CorA family Mg2+ transporter protein [Source:UniProtKB/TrEMBL;Acc:S7UT37] | transcript_product=CorA family Mg2+ transporter protein | location=TGGT1_chrXI:537155-545024(+) | protein_length=1550 | sequence_SO=chromosome | SO=protein_coding_gene | is_pseudo=false	0	1933.87	14
FALSE	High	MQHFSQPQNSVPSQPANPAHVDPNNNPEGDEGWK	[R].MQHFSQPQNSVPSQPANPAHVDPNNNPEGDEGWK.[S]	1xTMTpro [K34]; 1xTMTpro [N-Term]	1xTMTpro [K34]; 1xTMTpro [N-Term]	1.90135e-06	5.34993e-05	1	1	1	TGGT1_313010-t26_1-p1	TGGT1_313010-t26_1-p1 [46-79]			transcript=TGGT1_313010-t26_1 | gene=TGGT1_313010 | organism=Toxoplasma_gondii_GT1 | gene_product=DEAD (Asp-Glu-Ala-Asp) box polypeptide DDX6 [Source:UniProtKB/TrEMBL;Acc:S7W8B2] | transcript_product=DEAD (Asp-Glu-Ala-Asp) box polypeptide DDX6 | location=TGGT1_chrXI:2995385-2998767(-) | protein_length=475 | sequence_SO=chromosome | SO=protein_coding_gene | is_pseudo=false	0	4362.09	34
FALSE	High	MQSGEEEPAR	[R].MQSGEEEPAR.[Q]	1xTMTpro [N-Term]; 1xPhospho [S3(100)]	1xTMTpro [N-Term]; 1xPhospho [S3(100)]	0.000348853	5.34993e-05	1	1	2	TGGT1_233810-t26_1-p1	TGGT1_233810-t26_1-p1 [2145-2154]	TGGT1_233810-t26_1-p1 1xPhospho [S2147(100)]	TGGT1_233810-t26_1-p1 1xPhospho [S2147(100)]	transcript=TGGT1_233810-t26_1 | gene=TGGT1_233810 | organism=Toxoplasma_gondii_GT1 | gene_product=Sel1 repeat-containing protein [Source:UniProtKB/TrEMBL;Acc:S7V3R4] | transcript_product=Sel1 repeat-containing protein | location=TGGT1_chrVIII:2805272-2818439(+) | protein_length=2252 | sequence_SO=chromosome | SO=protein_coding_gene | is_pseudo=false	0	1517.66	10	1.098	1.106	0.98	0.86	0.944	0.951	0.843	0.799	0.805	0.794	0.13	0.15	-0.03	-0.22	-0.08	-0.07	-0.25	-0.32	-0.31	-0.33	0.149898	0.0858038	0.534369	0.415732	0.647505	0.764833	0.314911	0.521422	0.514377	0.47789	0.8946
FALSE	High	MQSLASVHGLR	[R].MQSLASVHGLR.[T]	1xTMTpro [N-Term]; 1xPhospho [S3(100)]	1xTMTpro [N-Term]; 1xPhospho [S3(100); S6(0)]	5.78082e-06	5.34993e-05	1	1	3	TGGT1_254480-t26_1-p1	TGGT1_254480-t26_1-p1 [275-285]	TGGT1_254480-t26_1-p1 1xPhospho [S277(100); S280(0)]	TGGT1_254480-t26_1-p1 1xPhospho [S277(100)]	transcript=TGGT1_254480-t26_1 | gene=TGGT1_254480 | organism=Toxoplasma_gondii_GT1 | gene_product=WD domain, G-beta repeat-containing protein [Source:UniProtKB/TrEMBL;Acc:S7UMW1] | transcript_product=WD domain, G-beta repeat-containing protein | location=TGGT1_chrIII:1745233-1748585(-) | protein_length=816 | sequence_SO=chromosome | SO=protein_coding_gene | is_pseudo=false	0	1582.81	11	1.536	2.136	2.177	0.946	1.453	2.019	2.058	2.016	3.182	2.17	0.62	1.09	1.12	-0.08	0.54	1.01	1.04	1.01	1.67	1.12	0.0236847	0.16258	0.0800603	0.872262	0.3863	0.0695856	0.152955	0.0347389	0.0270375	0.223412	0.8946
FALSE	High	MQSLASVHGLR	[R].MQSLASVHGLR.[T]	1xOxidation [M1]; 1xTMTpro [N-Term]; 1xPhospho [S3(100)]	1xOxidation [M1]; 1xTMTpro [N-Term]; 1xPhospho [S3(100); S6(0)]	1.48046e-06	5.34993e-05	1	1	1	TGGT1_254480-t26_1-p1	TGGT1_254480-t26_1-p1 [275-285]	TGGT1_254480-t26_1-p1 1xPhospho [S277(100); S280(0)]	TGGT1_254480-t26_1-p1 1xPhospho [S277(100)]	transcript=TGGT1_254480-t26_1 | gene=TGGT1_254480 | organism=Toxoplasma_gondii_GT1 | gene_product=WD domain, G-beta repeat-containing protein [Source:UniProtKB/TrEMBL;Acc:S7UMW1] | transcript_product=WD domain, G-beta repeat-containing protein | location=TGGT1_chrIII:1745233-1748585(-) | protein_length=816 | sequence_SO=chromosome | SO=protein_coding_gene | is_pseudo=false	0	1598.8	11
FALSE	High	MQSLASVHGLR	[R].MQSLASVHGLR.[T]	1xTMTpro [N-Term]; 2xPhospho [S3(100); S6(100)]	1xTMTpro [N-Term]; 2xPhospho [S3(100); S6(100)]	0.000214063	5.34993e-05	1	1	3	TGGT1_254480-t26_1-p1	TGGT1_254480-t26_1-p1 [275-285]	TGGT1_254480-t26_1-p1 2xPhospho [S277(100); S280(100)]	TGGT1_254480-t26_1-p1 2xPhospho [S277(100); S280(100)]	transcript=TGGT1_254480-t26_1 | gene=TGGT1_254480 | organism=Toxoplasma_gondii_GT1 | gene_product=WD domain, G-beta repeat-containing protein [Source:UniProtKB/TrEMBL;Acc:S7UMW1] | transcript_product=WD domain, G-beta repeat-containing protein | location=TGGT1_chrIII:1745233-1748585(-) | protein_length=816 | sequence_SO=chromosome | SO=protein_coding_gene | is_pseudo=false	0	1662.78	11
FALSE	High	MQSLLHLPHR	[R].MQSLLHLPHR.[S]	1xTMTpro [N-Term]; 1xPhospho [S3(100)]	1xTMTpro [N-Term]; 1xPhospho [S3(100)]	0.000174508	5.34993e-05	1	1	9	TGGT1_259200B-t26_1-p1	TGGT1_259200B-t26_1-p1 [701-710]	TGGT1_259200B-t26_1-p1 1xPhospho [S703(100)]	TGGT1_259200B-t26_1-p1 1xPhospho [S703(100)]	transcript=TGGT1_259200B-t26_1 | gene=TGGT1_259200B | organism=Toxoplasma_gondii_GT1 | gene_product=Na+/H+ exchanger NHE1 [Source:UniProtKB/TrEMBL;Acc:S7WEL3] | transcript_product=Na+/H+ exchanger NHE1 | location=TGGT1_chrVIIb:2842786-2849857(-) | protein_length=1450 | sequence_SO=chromosome | SO=protein_coding_gene | is_pseudo=false	0	1615.85	10
FALSE	High	MQSLLHLPHR	[R].MQSLLHLPHR.[S]	1xOxidation [M1]; 1xTMTpro [N-Term]; 1xPhospho [S3(100)]	1xOxidation [M1]; 1xTMTpro [N-Term]; 1xPhospho [S3(100)]	0.0003475	5.34993e-05	1	1	8	TGGT1_259200B-t26_1-p1	TGGT1_259200B-t26_1-p1 [701-710]	TGGT1_259200B-t26_1-p1 1xPhospho [S703(100)]	TGGT1_259200B-t26_1-p1 1xPhospho [S703(100)]	transcript=TGGT1_259200B-t26_1 | gene=TGGT1_259200B | organism=Toxoplasma_gondii_GT1 | gene_product=Na+/H+ exchanger NHE1 [Source:UniProtKB/TrEMBL;Acc:S7WEL3] | transcript_product=Na+/H+ exchanger NHE1 | location=TGGT1_chrVIIb:2842786-2849857(-) | protein_length=1450 | sequence_SO=chromosome | SO=protein_coding_gene | is_pseudo=false	0	1631.84	10	1.569	1.895	1.764	1.29	2.024	2.445	2.276	1.988	1.996	2.571	0.65	0.92	0.82	0.37	1.02	1.29	1.19	0.99	1	1.36	0.374523	0.254471	0.356407	0.0522423	0.240199	0.173008	0.246119	0.0939096	0.138647	0.131607	0.909509
FALSE	High	MQTDILEEHEQLMR	[R].MQTDILEEHEQLMR.[E]	1xTMTpro [N-Term]; 1xPhospho [T3(100)]	1xTMTpro [N-Term]; 1xPhospho [T3(100)]	3.89948e-14	5.34993e-05	1	1	11	TGGT1_232030-t26_1-p1	TGGT1_232030-t26_1-p1 [112-125]	TGGT1_232030-t26_1-p1 1xPhospho [T114(100)]	TGGT1_232030-t26_1-p1 1xPhospho [T114(100)]	transcript=TGGT1_232030-t26_1 | gene=TGGT1_232030 | organism=Toxoplasma_gondii_GT1 | gene_product=hypothetical protein | transcript_product=hypothetical protein | location=TGGT1_chrVIII:1768528-1771709(+) | protein_length=208 | sequence_SO=chromosome | SO=protein_coding_gene | is_pseudo=false	0	2157	14	1.465	2.503	2.197	0.95	1.392	2.379	2.088	1.755	2.69	2.233	0.55	1.32	1.14	-0.07	0.48	1.25	1.06	0.81	1.43	1.16	0.257642	0.0843302	0.073274	0.642913	0.405407	0.1468	0.146274	0.138353	0.11229	0.135325	0.900211
FALSE	High	MQTDILEEHEQLMR	[R].MQTDILEEHEQLMR.[E]	1xOxidation [M]; 1xTMTpro [N-Term]; 1xPhospho [T3(100)]	1xOxidation [M1; M13]; 1xTMTpro [N-Term]; 1xPhospho [T3(100)]	2.13213e-14	5.34993e-05	1	1	62	TGGT1_232030-t26_1-p1	TGGT1_232030-t26_1-p1 [112-125]	TGGT1_232030-t26_1-p1 1xPhospho [T114(100)]	TGGT1_232030-t26_1-p1 1xPhospho [T114(100)]	transcript=TGGT1_232030-t26_1 | gene=TGGT1_232030 | organism=Toxoplasma_gondii_GT1 | gene_product=hypothetical protein | transcript_product=hypothetical protein | location=TGGT1_chrVIII:1768528-1771709(+) | protein_length=208 | sequence_SO=chromosome | SO=protein_coding_gene | is_pseudo=false	0	2173	14	2.014	3.998	3.292	1.01	2.035	4.04	3.327	2.768	4.795	3.844	1.01	2	1.72	0.02	1.03	2.01	1.73	1.47	2.26	1.94	0.261874	0.0854905	0.0730468	0.898712	0.30586	0.113735	0.106115	0.0897954	0.0838841	0.0985452	0.900211
FALSE	High	MPSAGYLEQPSAR	[R].MPSAGYLEQPSAR.[E]	1xTMTpro [N-Term]; 1xPhospho [S3(100)]	1xTMTpro [N-Term]; 1xPhospho [S3(100); Y6(0); S11(0)]	4.17207e-05	5.34993e-05	1	1	1	TGGT1_265500-t26_1-p1	TGGT1_265500-t26_1-p1 [1978-1990]	TGGT1_265500-t26_1-p1 1xPhospho [S1980(100); Y1983(0); S1988(0)]	TGGT1_265500-t26_1-p1 1xPhospho [S1980(100)]	transcript=TGGT1_265500-t26_1 | gene=TGGT1_265500 | organism=Toxoplasma_gondii_GT1 | gene_product=Chloride channel protein [Source:UniProtKB/TrEMBL;Acc:S7UI33] | transcript_product=chloride transporter, chloride channel (ClC) family protein | location=TGGT1_chrIX:1338167-1348086(-) | protein_length=2075 | sequence_SO=chromosome | SO=protein_coding_gene | is_pseudo=false	0	1790.85	13
FALSE	High	MQTDILEEHEQLMR	[R].MQTDILEEHEQLMR.[E]	2xOxidation [M1; M13]; 1xTMTpro [N-Term]; 1xPhospho [T3(100)]	2xOxidation [M1; M13]; 1xTMTpro [N-Term]; 1xPhospho [T3(100)]	1.65055e-12	5.34993e-05	1	1	47	TGGT1_232030-t26_1-p1	TGGT1_232030-t26_1-p1 [112-125]	TGGT1_232030-t26_1-p1 1xPhospho [T114(100)]	TGGT1_232030-t26_1-p1 1xPhospho [T114(100)]	transcript=TGGT1_232030-t26_1 | gene=TGGT1_232030 | organism=Toxoplasma_gondii_GT1 | gene_product=hypothetical protein | transcript_product=hypothetical protein | location=TGGT1_chrVIII:1768528-1771709(+) | protein_length=208 | sequence_SO=chromosome | SO=protein_coding_gene | is_pseudo=false	0	2188.99	14	2.52	6.991	5.556	1.106	2.788	7.734	6.146	4.819	9.378	7.463	1.33	2.81	2.47	0.15	1.48	2.95	2.62	2.27	3.23	2.9	0.177292	0.01896	0.00383661	0.812204	0.33557	0.12005	0.111771	0.104018	0.096789	0.110539	0.900211
FALSE	High	MREEDIAEGPAAVSDVSSPSASLSAR	[R].MREEDIAEGPAAVSDVSSPSASLSAR.[A]	1xTMTpro [N-Term]; 2xPhospho [S14(99.7); S]	1xTMTpro [N-Term]; 2xPhospho [S14(99.7); S17(50.1); S18(50.1); S20(0); S22(0); S24(0)]	3.62895e-07	5.34993e-05	1	1	2	TGGT1_274130-t26_1-p1	TGGT1_274130-t26_1-p1 [1724-1749]	TGGT1_274130-t26_1-p1 2xPhospho [S1737(99.7); S1740(50.1); S1741(50.1); S1743(0); S1745(0); S1747(0)]	TGGT1_274130-t26_1-p1 2xPhospho [S1737(99.7); S]	transcript=TGGT1_274130-t26_1 | gene=TGGT1_274130 | organism=Toxoplasma_gondii_GT1 | gene_product=Rab-GAP TBC domain-containing protein [Source:UniProtKB/TrEMBL;Acc:S7WCL1] | transcript_product=TBC domain-containing protein | location=TGGT1_chrVIII:2992253-3004561(+) | protein_length=2118 | sequence_SO=chromosome | SO=protein_coding_gene | is_pseudo=false	1	3096.39	26
FALSE	High	MRSDSENETTDER	[R].MRSDSENETTDER.[A]	1xTMTpro [N-Term]; 2xPhospho [S3(100); S5(100)]	1xTMTpro [N-Term]; 2xPhospho [S3(100); S5(100); T9(0); T10(0)]	8.42294e-07	5.34993e-05	1	1	3	TGGT1_223640-t26_1-p1	TGGT1_223640-t26_1-p1 [25-37]	TGGT1_223640-t26_1-p1 2xPhospho [S27(100); S29(100); T33(0); T34(0)]	TGGT1_223640-t26_1-p1 2xPhospho [S27(100); S29(100)]	transcript=TGGT1_223640-t26_1 | gene=TGGT1_223640 | organism=Toxoplasma_gondii_GT1 | gene_product=hypothetical protein | transcript_product=hypothetical protein | location=TGGT1_chrX:3587637-3592496(+) | protein_length=1619 | sequence_SO=chromosome | SO=protein_coding_gene | is_pseudo=false	1	2033.78	13	0.925	0.991	0.916	0.954	0.882	0.945	0.873	0.916	0.959	0.854	-0.11	-0.01	-0.13	-0.07	-0.18	-0.08	-0.2	-0.13	-0.06	-0.23	0.515361	0.901432	0.514827	0.401069	0.227662	0.265219	0.255947	0.49396	0.576508	0.142202	0.925814
FALSE	High	MRSDSENETTDER	[R].MRSDSENETTDER.[A]	1xOxidation [M1]; 1xTMTpro [N-Term]; 2xPhospho [S3(100); S5(100)]	1xOxidation [M1]; 1xTMTpro [N-Term]; 2xPhospho [S3(100); S5(100); T9(0); T10(0)]	0.000346152	5.34993e-05	1	1	2	TGGT1_223640-t26_1-p1	TGGT1_223640-t26_1-p1 [25-37]	TGGT1_223640-t26_1-p1 2xPhospho [S27(100); S29(100); T33(0); T34(0)]	TGGT1_223640-t26_1-p1 2xPhospho [S27(100); S29(100)]	transcript=TGGT1_223640-t26_1 | gene=TGGT1_223640 | organism=Toxoplasma_gondii_GT1 | gene_product=hypothetical protein | transcript_product=hypothetical protein | location=TGGT1_chrX:3587637-3592496(+) | protein_length=1619 | sequence_SO=chromosome | SO=protein_coding_gene | is_pseudo=false	1	2049.78	13
FALSE	High	MRSESPNGER	[R].MRSESPNGER.[R]	1xTMTpro [N-Term]; 2xPhospho [S3(100); S5(100)]	1xTMTpro [N-Term]; 2xPhospho [S3(100); S5(100)]	0.000322736	5.34993e-05	1	1	5	TGGT1_313180-t26_1-p1	TGGT1_313180-t26_1-p1 [285-294]	TGGT1_313180-t26_1-p1 2xPhospho [S287(100); S289(100)]	TGGT1_313180-t26_1-p1 2xPhospho [S287(100); S289(100)]	transcript=TGGT1_313180-t26_1 | gene=TGGT1_313180 | organism=Toxoplasma_gondii_GT1 | gene_product=Protein kinase domain-containing protein [Source:UniProtKB/TrEMBL;Acc:S7UT92] | transcript_product=putative cell-cycle-associated protein kinase PRP4 | location=TGGT1_chrXI:3115853-3121175(-) | protein_length=928 | sequence_SO=chromosome | SO=protein_coding_gene | is_pseudo=false	1	1626.67	10	1.154	1.15	1.108	0.88	1.015	1.012	0.975	0.905	0.851	0.948	0.21	0.2	0.15	-0.18	0.02	0.02	-0.04	-0.14	-0.23	-0.08	0.457228	0.500422	0.463832	0.229863	0.874802	0.916409	0.66712	0.614892	0.116617	0.153205	0.917517
FALSE	High	MRSFANDIPNK	[R].MRSFANDIPNK.[V]	1xTMTpro [K11]; 1xTMTpro [N-Term]; 1xPhospho [S3(100)]	1xTMTpro [K11]; 1xTMTpro [N-Term]; 1xPhospho [S3(100)]	0.000280457	5.34993e-05	1	1	4	TGGT1_310670-t26_1-p1	TGGT1_310670-t26_1-p1 [900-910]	TGGT1_310670-t26_1-p1 1xPhospho [S902(100)]	TGGT1_310670-t26_1-p1 1xPhospho [S902(100)]	transcript=TGGT1_310670-t26_1 | gene=TGGT1_310670 | organism=Toxoplasma_gondii_GT1 | gene_product=Alpha-1,4 glucan phosphorylase [Source:UniProtKB/TrEMBL;Acc:S7UT34] | transcript_product=putative glycogen phosphorylase 1 | location=TGGT1_chrXI:1474522-1478513(+) | protein_length=912 | sequence_SO=chromosome | SO=protein_coding_gene | is_pseudo=false	1	1981.02	11	1.227	1.214	1.324	0.742	0.91	0.901	0.982	0.732	1.187	1.206	0.29	0.28	0.41	-0.43	-0.14	-0.15	-0.03	-0.45	0.25	0.27	0.459678	0.693157	0.670731	0.771748	0.903309	0.846579	0.962562	0.722202	0.700064	0.657942	0.91769
FALSE	High	MRSVEEETAAEEGK	[R].MRSVEEETAAEEGK.[K]	1xTMTpro [K14]; 1xTMTpro [N-Term]; 1xPhospho [S3(100)]	1xTMTpro [K14]; 1xTMTpro [N-Term]; 1xPhospho [S3(100); T8(0)]	0.000250392	5.34993e-05	1	1	2	TGGT1_316200-t26_1-p1	TGGT1_316200-t26_1-p1 [344-357]	TGGT1_316200-t26_1-p1 1xPhospho [S346(100); T351(0)]	TGGT1_316200-t26_1-p1 1xPhospho [S346(100)]	transcript=TGGT1_316200-t26_1 | gene=TGGT1_316200 | organism=Toxoplasma_gondii_GT1 | gene_product=Phosphoglycerate mutase family protein [Source:UniProtKB/TrEMBL;Acc:S7UM57] | transcript_product=phosphoglycerate mutase family protein | location=TGGT1_chrXI:5126229-5130526(-) | protein_length=555 | sequence_SO=chromosome | SO=protein_coding_gene | is_pseudo=false	1	2254.09	14	0.653	0.583	0.726	1.107	0.723	0.645	0.803	0.779	0.774	0.846	-0.61	-0.78	-0.46	0.15	-0.47	-0.63	-0.32	-0.36	-0.37	-0.24	0.0577805	0.154151	0.115304	0.705963	0.300494	0.101919	0.372797	0.0168676	0.559169	0.750988	0.8946
FALSE	High	MRTHAAIDSGVGEGTR	[R].MRTHAAIDSGVGEGTR.[S]	1xTMTpro [N-Term]; 1xPhospho [T3(100)]	1xTMTpro [N-Term]; 1xPhospho [T3(100); S9(0); T15(0)]	3.9404e-08	5.34993e-05	1	1	7	TGGT1_259200B-t26_1-p1	TGGT1_259200B-t26_1-p1 [523-538]	TGGT1_259200B-t26_1-p1 1xPhospho [T525(100); S531(0); T537(0)]	TGGT1_259200B-t26_1-p1 1xPhospho [T525(100)]	transcript=TGGT1_259200B-t26_1 | gene=TGGT1_259200B | organism=Toxoplasma_gondii_GT1 | gene_product=Na+/H+ exchanger NHE1 [Source:UniProtKB/TrEMBL;Acc:S7WEL3] | transcript_product=Na+/H+ exchanger NHE1 | location=TGGT1_chrVIIb:2842786-2849857(-) | protein_length=1450 | sequence_SO=chromosome | SO=protein_coding_gene | is_pseudo=false	1	2041.98	16	1.358	1.584	1.568	0.881	1.196	1.395	1.381	1.388	1.283	1.133	0.44	0.66	0.65	-0.18	0.26	0.48	0.47	0.47	0.36	0.18	0.196478	0.0767341	0.0629823	0.591084	0.625082	0.21047	0.235719	0.309437	0.318664	0.141003	0.900211
FALSE	High	MRTHAAIDSGVGEGTR	[R].MRTHAAIDSGVGEGTR.[S]	1xOxidation [M1]; 1xTMTpro [N-Term]; 1xPhospho [T3(100)]	1xOxidation [M1]; 1xTMTpro [N-Term]; 1xPhospho [T3(100); S9(0); T15(0)]	5.58901e-08	5.34993e-05	1	1	9	TGGT1_259200B-t26_1-p1	TGGT1_259200B-t26_1-p1 [523-538]	TGGT1_259200B-t26_1-p1 1xPhospho [T525(100); S531(0); T537(0)]	TGGT1_259200B-t26_1-p1 1xPhospho [T525(100)]	transcript=TGGT1_259200B-t26_1 | gene=TGGT1_259200B | organism=Toxoplasma_gondii_GT1 | gene_product=Na+/H+ exchanger NHE1 [Source:UniProtKB/TrEMBL;Acc:S7WEL3] | transcript_product=Na+/H+ exchanger NHE1 | location=TGGT1_chrVIIb:2842786-2849857(-) | protein_length=1450 | sequence_SO=chromosome | SO=protein_coding_gene | is_pseudo=false	1	2057.98	16	1.828	1.73	1.545	1.325	2.421	2.292	2.046	3.229	2.874	1.744	0.87	0.79	0.63	0.41	1.28	1.2	1.03	1.69	1.52	0.8	0.121043	0.110255	0.243783	0.186281	0.14213	0.136493	0.221651	0.0427001	0.142902	0.554603	0.8946
FALSE	High	MRTHAAIDSGVGEGTR	[R].MRTHAAIDSGVGEGTR.[S]	1xTMTpro [N-Term]; 2xPhospho [T3(100); S9(100)]	1xTMTpro [N-Term]; 2xPhospho [T3(100); S9(100); T15(0)]	7.3513e-05	5.34993e-05	1	1	2	TGGT1_259200B-t26_1-p1	TGGT1_259200B-t26_1-p1 [523-538]	TGGT1_259200B-t26_1-p1 2xPhospho [T525(100); S531(100); T537(0)]	TGGT1_259200B-t26_1-p1 2xPhospho [T525(100); S531(100)]	transcript=TGGT1_259200B-t26_1 | gene=TGGT1_259200B | organism=Toxoplasma_gondii_GT1 | gene_product=Na+/H+ exchanger NHE1 [Source:UniProtKB/TrEMBL;Acc:S7WEL3] | transcript_product=Na+/H+ exchanger NHE1 | location=TGGT1_chrVIIb:2842786-2849857(-) | protein_length=1450 | sequence_SO=chromosome | SO=protein_coding_gene | is_pseudo=false	1	2121.95	16
FALSE	High	MRTHAAIDSGVGEGTRSPVLSR	[R].MRTHAAIDSGVGEGTRSPVLSR.[G]	1xTMTpro [N-Term]; 2xPhospho [T3(100); T/S]	1xTMTpro [N-Term]; 2xPhospho [T3(100); S9(0); T15(50); S17(50); S21(0)]	1.67528e-05	5.34993e-05	1	1	1	TGGT1_259200B-t26_1-p1	TGGT1_259200B-t26_1-p1 [523-544]	TGGT1_259200B-t26_1-p1 2xPhospho [T525(100); S531(0); T537(50); S539(50); S543(0)]	TGGT1_259200B-t26_1-p1 2xPhospho [T525(100); T/S]	transcript=TGGT1_259200B-t26_1 | gene=TGGT1_259200B | organism=Toxoplasma_gondii_GT1 | gene_product=Na+/H+ exchanger NHE1 [Source:UniProtKB/TrEMBL;Acc:S7WEL3] | transcript_product=Na+/H+ exchanger NHE1 | location=TGGT1_chrVIIb:2842786-2849857(-) | protein_length=1450 | sequence_SO=chromosome | SO=protein_coding_gene | is_pseudo=false	2	2761.32	22	2.426	1.802	1.597	0.588	1.427	1.06	0.939	1.322	0.935	0.922	1.28	0.85	0.68	-0.77	0.51	0.08	-0.09	0.4	-0.1	-0.12	0.0270884	0.144331	0.0676431	0.211451	0.246958	0.43373	0.833053	0.18155	0.460529	0.521392	0.8946
FALSE	High	MRTLLAPLLPLR	[R].MRTLLAPLLPLR.[M]	1xOxidation [M1]; 1xTMTpro [N-Term]; 1xPhospho [T3(100)]	1xOxidation [M1]; 1xTMTpro [N-Term]; 1xPhospho [T3(100)]	0.000114009	5.34993e-05	1	1	1	TGGT1_312840-t26_1-p1	TGGT1_312840-t26_1-p1 [660-671]	TGGT1_312840-t26_1-p1 1xPhospho [T662(100)]	TGGT1_312840-t26_1-p1 1xPhospho [T662(100)]	transcript=TGGT1_312840-t26_1 | gene=TGGT1_312840 | organism=Toxoplasma_gondii_GT1 | gene_product=WD_REPEATS_REGION domain-containing protein [Source:UniProtKB/TrEMBL;Acc:S7USM1] | transcript_product=hypothetical protein | location=TGGT1_chrXI:2903836-2912150(+) | protein_length=1112 | sequence_SO=chromosome | SO=protein_coding_gene | is_pseudo=false	1	1794.04	12
FALSE	High	MSADSVPQIEGEGEEHESEADDKESK	[R].MSADSVPQIEGEGEEHESEADDKESK.[V]	2xTMTpro [K23; K26]; 1xTMTpro [N-Term]; 1xPhospho [S18(100)]	2xTMTpro [K23; K26]; 1xTMTpro [N-Term]; 1xPhospho [S2(0); S5(0); S18(100); S25(0)]	2.91682e-07	5.34993e-05	1	1	3	TGGT1_230690-t26_1-p1	TGGT1_230690-t26_1-p1 [1098-1123]	TGGT1_230690-t26_1-p1 1xPhospho [S1099(0); S1102(0); S1115(100); S1122(0)]	TGGT1_230690-t26_1-p1 1xPhospho [S1115(100)]	transcript=TGGT1_230690-t26_1 | gene=TGGT1_230690 | organism=Toxoplasma_gondii_GT1 | gene_product=LNS2 domain-containing protein [Source:UniProtKB/TrEMBL;Acc:S7V2T5] | transcript_product=LNS2 (Lipin/Ned1/Smp2) protein | location=TGGT1_chrVIII:959180-970351(-) | protein_length=1575 | sequence_SO=chromosome | SO=protein_coding_gene | is_pseudo=false	1	3825.78	26	1.204	0.997	1.344	0.905	1.09	0.903	1.216	1.049	0.784	1.236	0.27	0	0.43	-0.14	0.12	-0.15	0.28	0.07	-0.35	0.31	0.534613	0.974201	0.308769	0.546215	0.833874	0.671595	0.601724	0.866104	0.239244	0.350543	0.927534
FALSE	High	MREEDIAEGPAAVSDVSSPSASLSAR	[R].MREEDIAEGPAAVSDVSSPSASLSAR.[A]	1xTMTpro [N-Term]; 1xPhospho [S]	1xTMTpro [N-Term]; 1xPhospho [S14(0); S17(50); S18(50); S20(0); S22(0); S24(0)]	3.11128e-06	5.34993e-05	1	1	4	TGGT1_274130-t26_1-p1	TGGT1_274130-t26_1-p1 [1724-1749]			transcript=TGGT1_274130-t26_1 | gene=TGGT1_274130 | organism=Toxoplasma_gondii_GT1 | gene_product=Rab-GAP TBC domain-containing protein [Source:UniProtKB/TrEMBL;Acc:S7WCL1] | transcript_product=TBC domain-containing protein | location=TGGT1_chrVIII:2992253-3004561(+) | protein_length=2118 | sequence_SO=chromosome | SO=protein_coding_gene | is_pseudo=false	1	3016.43	26
FALSE	High	MPSAEHEELR	[K].MPSAEHEELR.[E]	1xTMTpro [N-Term]; 1xPhospho [S3(100)]	1xTMTpro [N-Term]; 1xPhospho [S3(100)]	0.000254342	5.34993e-05	1	1	5	TGGT1_289990-t26_1-p1	TGGT1_289990-t26_1-p1 [640-649]	TGGT1_289990-t26_1-p1 1xPhospho [S642(100)]	TGGT1_289990-t26_1-p1 1xPhospho [S642(100)]	transcript=TGGT1_289990-t26_1 | gene=TGGT1_289990 | organism=Toxoplasma_gondii_GT1 | gene_product=hypothetical protein | transcript_product=hypothetical protein | location=TGGT1_chrIX:3375629-3379939(-) | protein_length=753 | sequence_SO=chromosome | SO=protein_coding_gene | is_pseudo=false	0	1582.73	10	1.162	1.12	1.13	0.952	1.106	1.066	1.076	0.914	1.009	1.075	0.22	0.16	0.18	-0.07	0.14	0.09	0.11	-0.13	0.01	0.1	0.483442	0.729813	0.419336	0.741851	0.167164	0.719674	0.175453	0.459215	0.65442	0.101335	0.919786
FALSE	High	MPKPFSHSDPEAPTDDTFLGAER	[K].MPKPFSHSDPEAPTDDTFLGAER.[A]	1xTMTpro [K3]; 1xTMTpro [N-Term]; 1xPhospho [S8(100)]	1xTMTpro [K3]; 1xTMTpro [N-Term]; 1xPhospho [S6(0); S8(100); T14(0); T17(0)]	4.18538e-11	5.34993e-05	1	1	1	TGGT1_293510-t26_1-p1	TGGT1_293510-t26_1-p1 [152-174]	TGGT1_293510-t26_1-p1 1xPhospho [S157(0); S159(100); T165(0); T168(0)]	TGGT1_293510-t26_1-p1 1xPhospho [S159(100)]	transcript=TGGT1_293510-t26_1 | gene=TGGT1_293510 | organism=Toxoplasma_gondii_GT1 | gene_product=Poly(ADP-ribose) polymerase and DNA-Ligase Zn-finger region domain-containing protein [Source:UniProtKB/TrEMBL;Acc:S7UHM3] | transcript_product=poly(ADP-ribose) polymerase and DNA-Ligase Zn-finger region domain-containing protein | location=TGGT1_chrIa:371571-373049(-) | protein_length=392 | sequence…	0	3233.55	23	0.978	0.807	0.95	0.89	0.87	0.718	0.845	0.733	0.775	0.826	-0.03	-0.31	-0.07	-0.17	-0.2	-0.48	-0.24	-0.45	-0.37	-0.28	0.582651	0.17425	0.745897	0.79722	0.778165	0.571381	0.602015	0.45231	0.0841646	0.278788	0.935212
FALSE	High	MNVLADCLK	[R].MNVLADCLK.[T]	1xOxidation [M1]; 1xMethylthio [C7]; 1xTMTpro [K9]; 1xTMTpro [N-Term]	1xOxidation [M1]; 1xMethylthio [C7]; 1xTMTpro [K9]; 1xTMTpro [N-Term]	1.57845e-05	5.34993e-05	1	1	1	TGGT1_234450-t26_1-p1	TGGT1_234450-t26_1-p1 [105-113]	TGGT1_234450-t26_1-p1 1xMethylthio [C111]	TGGT1_234450-t26_1-p1 1xMethylthio [C111]	transcript=TGGT1_234450-t26_1 | gene=TGGT1_234450 | organism=Toxoplasma_gondii_GT1 | gene_product=Ribosomal protein RPS15A [Source:UniProtKB/TrEMBL;Acc:S7UWC7] | transcript_product=ribosomal protein RPS15A | location=TGGT1_chrX:4292801-4294683(+) | protein_length=231 | sequence_SO=chromosome | SO=protein_coding_gene | is_pseudo=false	0	1676.9	9
FALSE	High	MLDSPLYEEERPEENASEQSPASEK	[R].MLDSPLYEEERPEENASEQSPASEK.[Q]	1xOxidation [M1]; 1xTMTpro [K25]; 1xTMTpro [N-Term]; 1xPhospho [S4(100)]	1xOxidation [M1]; 1xTMTpro [K25]; 1xTMTpro [N-Term]; 1xPhospho [S4(100); Y7(0); S17(0); S20(0); S23(0)]	0.00010329	5.34993e-05	1	1	2	TGGT1_311920-t26_1-p1	TGGT1_311920-t26_1-p1 [2003-2027]	TGGT1_311920-t26_1-p1 1xPhospho [S2006(100); Y2009(0); S2019(0); S2022(0); S2025(0)]	TGGT1_311920-t26_1-p1 1xPhospho [S2006(100)]	transcript=TGGT1_311920-t26_1 | gene=TGGT1_311920 | organism=Toxoplasma_gondii_GT1 | gene_product=GRAM domain-containing protein [Source:UniProtKB/TrEMBL;Acc:S7UTV3] | transcript_product=GRAM domain-containing protein | location=TGGT1_chrXI:2336545-2355556(+) | protein_length=2528 | sequence_SO=chromosome | SO=protein_coding_gene | is_pseudo=false	0	3569.65	25
FALSE	High	MLDSPLYEEERPEENASEQSPASEK	[R].MLDSPLYEEERPEENASEQSPASEK.[Q]	1xTMTpro [K25]; 1xTMTpro [N-Term]; 2xPhospho [S20(100); S23(100)]	1xTMTpro [K25]; 1xTMTpro [N-Term]; 2xPhospho [S4(0); Y7(0); S17(0); S20(100); S23(100)]	4.18229e-08	5.34993e-05	1	1	2	TGGT1_311920-t26_1-p1	TGGT1_311920-t26_1-p1 [2003-2027]	TGGT1_311920-t26_1-p1 2xPhospho [S2006(0); Y2009(0); S2019(0); S2022(100); S2025(100)]	TGGT1_311920-t26_1-p1 2xPhospho [S2022(100); S2025(100)]	transcript=TGGT1_311920-t26_1 | gene=TGGT1_311920 | organism=Toxoplasma_gondii_GT1 | gene_product=GRAM domain-containing protein [Source:UniProtKB/TrEMBL;Acc:S7UTV3] | transcript_product=GRAM domain-containing protein | location=TGGT1_chrXI:2336545-2355556(+) | protein_length=2528 | sequence_SO=chromosome | SO=protein_coding_gene | is_pseudo=false	0	3633.62	25
FALSE	High	MIDTSLHQPLSPR	[-].MIDTSLHQPLSPR.[T]	1xAcetyl [N-Term]; 1xTMTpro [N-Term]; 1xPhospho [S11(100)]	1xAcetyl [N-Term]; 1xTMTpro [N-Term]; 1xPhospho [T4(0); S5(0); S11(100)]	0.000248439	5.34993e-05	1	1	3	TGGT1_313030-t26_1-p1	TGGT1_313030-t26_1-p1 [1-13]	TGGT1_313030-t26_1-p1 1xAcetyl [N-Term]; 1xPhospho [T4(0); S5(0); S11(100)]	TGGT1_313030-t26_1-p1 1xAcetyl [N-Term]; 1xPhospho [S11(100)]	transcript=TGGT1_313030-t26_1 | gene=TGGT1_313030 | organism=Toxoplasma_gondii_GT1 | gene_product=hypothetical protein | transcript_product=hypothetical protein | location=TGGT1_chrXI:3019585-3026086(+) | protein_length=1641 | sequence_SO=chromosome | SO=protein_coding_gene | is_pseudo=false	0	1920.96	13
FALSE	High	MLGTIPGSPPLSPRPEGEDALGDR	[R].MLGTIPGSPPLSPRPEGEDALGDR.[N]	1xTMTpro [N-Term]; 1xPhospho [S8(99.4)]	1xTMTpro [N-Term]; 1xPhospho [T4(0); S8(99.4); S12(0.6)]	3.58946e-06	5.34993e-05	1	1	1	TGGT1_233430-t26_1-p1	TGGT1_233430-t26_1-p1 [2429-2452]	TGGT1_233430-t26_1-p1 1xPhospho [T2432(0); S2436(99.4); S2440(0.6)]	TGGT1_233430-t26_1-p1 1xPhospho [S2436(99.4)]	transcript=TGGT1_233430-t26_1 | gene=TGGT1_233430 | organism=Toxoplasma_gondii_GT1 | gene_product=hypothetical protein | transcript_product=hypothetical protein | location=TGGT1_chrVIII:2635508-2654681(+) | protein_length=3809 | sequence_SO=chromosome | SO=protein_coding_gene | is_pseudo=false	0	2846.41	24
FALSE	High	MLGTIPGSPPLSPRPEGEDALGDR	[R].MLGTIPGSPPLSPRPEGEDALGDR.[N]	1xTMTpro [N-Term]; 2xPhospho [S8(100); S12(100)]	1xTMTpro [N-Term]; 2xPhospho [T4(0); S8(100); S12(100)]	9.6791e-07	5.34993e-05	1	1	1	TGGT1_233430-t26_1-p1	TGGT1_233430-t26_1-p1 [2429-2452]	TGGT1_233430-t26_1-p1 2xPhospho [T2432(0); S2436(100); S2440(100)]	TGGT1_233430-t26_1-p1 2xPhospho [S2436(100); S2440(100)]	transcript=TGGT1_233430-t26_1 | gene=TGGT1_233430 | organism=Toxoplasma_gondii_GT1 | gene_product=hypothetical protein | transcript_product=hypothetical protein | location=TGGT1_chrVIII:2635508-2654681(+) | protein_length=3809 | sequence_SO=chromosome | SO=protein_coding_gene | is_pseudo=false	0	2926.37	24
FALSE	High	MLHNAIEEEESGSEK	[R].MLHNAIEEEESGSEK.[R]	1xTMTpro [K15]; 1xTMTpro [N-Term]; 1xPhospho [S11(100)]	1xTMTpro [K15]; 1xTMTpro [N-Term]; 1xPhospho [S11(100); S13(0)]	7.24298e-07	5.34993e-05	1	1	3	TGGT1_226990-t26_1-p1	TGGT1_226990-t26_1-p1 [314-328]	TGGT1_226990-t26_1-p1 1xPhospho [S324(100); S326(0)]	TGGT1_226990-t26_1-p1 1xPhospho [S324(100)]	transcript=TGGT1_226990-t26_1 | gene=TGGT1_226990 | organism=Toxoplasma_gondii_GT1 | gene_product=hypothetical protein | transcript_product=hypothetical protein | location=TGGT1_chrX:1068028-1070058(-) | protein_length=676 | sequence_SO=chromosome | SO=protein_coding_gene | is_pseudo=false	0	2391.14	15	1.097	1.006	0.98	0.948	1.04	0.953	0.929	0.927	1.028	0.905	0.13	0.01	-0.03	-0.08	0.06	-0.07	-0.11	-0.11	0.04	-0.14	0.611619	0.956072	0.666608	0.203334	0.836997	0.585385	0.15174	0.735251	0.777434	0.555484	0.941733
FALSE	High	MLLEEFTK	[R].MLLEEFTK.[D]	1xOxidation [M1]; 1xTMTpro [K8]; 1xTMTpro [N-Term]	1xOxidation [M1]; 1xTMTpro [K8]; 1xTMTpro [N-Term]	2.30128e-05	5.34993e-05	1	1	2	TGGT1_229480-t26_1-p1	TGGT1_229480-t26_1-p1 [266-273]			transcript=TGGT1_229480-t26_1 | gene=TGGT1_229480 | organism=Toxoplasma_gondii_GT1 | gene_product=Putative calcium binding protein [Source:UniProtKB/TrEMBL;Acc:S7V2K1] | transcript_product=putative calcium binding protein precursor | location=TGGT1_chrVIII:289042-291582(-) | protein_length=335 | sequence_SO=chromosome | SO=protein_coding_gene | is_pseudo=false	0	1634.93	8
FALSE	High	MLIQTQDSIPEIK	[K].MLIQTQDSIPEIK.[E]	1xOxidation [M1]; 1xTMTpro [K13]; 1xTMTpro [N-Term]	1xOxidation [M1]; 1xTMTpro [K13]; 1xTMTpro [N-Term]	0.000178675	5.34993e-05	1	1	1	TGGT1_249900-t26_1-p1	TGGT1_249900-t26_1-p1 [50-62]			transcript=TGGT1_249900-t26_1 | gene=TGGT1_249900 | organism=Toxoplasma_gondii_GT1 | gene_product=Putative adenine nucleotide translocator [Source:UniProtKB/TrEMBL;Acc:A0A125YLS5] | transcript_product=putative adenine nucleotide translocator | location=TGGT1_chrXII:4873424-4874380(+) | protein_length=318 | sequence_SO=chromosome | SO=protein_coding_gene | is_pseudo=false	0	2140.22	13	1.228	1.023	1.163	0.927	1.138	0.948	1.078	0.929	1.101	1.13	0.3	0.03	0.22	-0.11	0.19	-0.08	0.11	-0.11	0.14	0.18	0.353836	0.523857	0.417993	0.454396	0.283433	0.66	0.751828	0.708249	0.156578	0.0662736	0.90924
FALSE	High	MINADSTLRPLFQK	[R].MINADSTLRPLFQK.[D]	1xOxidation [M1]; 1xTMTpro [K14]; 1xTMTpro [N-Term]; 1xPhospho [S/T]	1xOxidation [M1]; 1xTMTpro [K14]; 1xTMTpro [N-Term]; 1xPhospho [S6(50); T7(50)]	1.51702e-05	5.34993e-05	1	1	1	TGGT1_273930-t26_1-p1	TGGT1_273930-t26_1-p1 [216-229]			transcript=TGGT1_273930-t26_1 | gene=TGGT1_273930 | organism=Toxoplasma_gondii_GT1 | gene_product=SWIB domain-containing protein [Source:UniProtKB/TrEMBL;Acc:S7V4C1] | transcript_product=DNA topoisomerase domain-containing protein | location=TGGT1_chrVIII:3163479-3165871(+) | protein_length=254 | sequence_SO=chromosome | SO=protein_coding_gene | is_pseudo=false	0	2338.25	14
FALSE	High	MLPHAPGVQMQAIPEDAIPEESGDEDEDDPDKR	[R].MLPHAPGVQMQAIPEDAIPEESGDEDEDDPDKR.[I]	1xTMTpro [K32]; 1xTMTpro [N-Term]; 1xPhospho [S22(100)]	1xTMTpro [K32]; 1xTMTpro [N-Term]; 1xPhospho [S22(100)]	1.07482e-12	5.34993e-05	1	1	1	Q13547	Q13547 [372-404]	Q13547 1xPhospho [S393(100)]	Q13547 1xPhospho [S393(100)]	Histone deacetylase 1 OS=Homo sapiens (Human) OX=9606 GN=HDAC1 PE=1 SV=1	1	4320	33
FALSE	High	MLPHAPGVQMQAIPEDAIPEESGDEDEDDPDKR	[R].MLPHAPGVQMQAIPEDAIPEESGDEDEDDPDKR.[I]	1xOxidation [M10]; 1xTMTpro [K32]; 1xTMTpro [N-Term]; 1xPhospho [S22(100)]	1xOxidation [M10]; 1xTMTpro [K32]; 1xTMTpro [N-Term]; 1xPhospho [S22(100)]	1.5817e-11	5.34993e-05	1	1	1	Q13547	Q13547 [372-404]	Q13547 1xPhospho [S393(100)]	Q13547 1xPhospho [S393(100)]	Histone deacetylase 1 OS=Homo sapiens (Human) OX=9606 GN=HDAC1 PE=1 SV=1	1	4335.99	33
FALSE	High	MLPHAPGVQMQAIPEDAVHEDSGDEDGEDPDKR	[R].MLPHAPGVQMQAIPEDAVHEDSGDEDGEDPDKR.[I]	1xTMTpro [K32]; 1xTMTpro [N-Term]; 1xPhospho [S22(100)]	1xTMTpro [K32]; 1xTMTpro [N-Term]; 1xPhospho [S22(100)]	9.30613e-14	5.34993e-05	1	1	1	Q92769	Q92769 [373-405]	Q92769 1xPhospho [S394(100)]	Q92769 1xPhospho [S394(100)]	Histone deacetylase 2 OS=Homo sapiens (Human) OX=9606 GN=HDAC2 PE=1 SV=2	1	4273.97	33	1.146	1.006	0.93	1.121	1.285	1.127	1.043	1.058	0.984	1.103	0.2	0.01	-0.1	0.16	0.36	0.17	0.06	0.08	-0.02	0.14	0.350682	0.966914	0.338726	0.648715	0.24495	0.35387	0.884719	0.389882	0.9221	0.0718332	0.9065
FALSE	High	MLRPGASLLPPLSPSPSR	[R].MLRPGASLLPPLSPSPSR.[A]	1xOxidation [M1]; 1xTMTpro [N-Term]; 1xPhospho [S7(100)]	1xOxidation [M1]; 1xTMTpro [N-Term]; 1xPhospho [S7(100); S13(0); S15(0); S17(0)]	2.99011e-05	5.34993e-05	1	1	3	TGGT1_254370-t26_1-p1	TGGT1_254370-t26_1-p1 [1180-1197]	TGGT1_254370-t26_1-p1 1xPhospho [S1186(100); S1192(0); S1194(0); S1196(0)]	TGGT1_254370-t26_1-p1 1xPhospho [S1186(100)]	transcript=TGGT1_254370-t26_1 | gene=TGGT1_254370 | organism=Toxoplasma_gondii_GT1 | gene_product=Guanylyl cyclase [Source:UniProtKB/TrEMBL;Acc:S7VVK4] | transcript_product=guanylyl cyclase | location=TGGT1_chrIII:1634182-1672467(+) | protein_length=4367 | sequence_SO=chromosome | SO=protein_coding_gene | is_pseudo=false	0	2276.22	18	0.926	0.982	0.839	1.013	0.939	0.995	0.85	0.99	1.001	0.964	-0.11	-0.03	-0.25	0.02	-0.09	-0.01	-0.23	-0.01	0	-0.05	0.072221	0.626249	0.141387	0.777289	0.394621	0.949829	0.0126308	0.0398808	0.995148	0.512598	0.8946
FALSE	High	MLRPGASLLPPLSPSPSR	[R].MLRPGASLLPPLSPSPSR.[A]	1xTMTpro [N-Term]; 3xPhospho [S7(100); S13(100); S17(100)]	1xTMTpro [N-Term]; 3xPhospho [S7(100); S13(100); S15(0); S17(100)]	0.000235184	5.34993e-05	1	1	1	TGGT1_254370-t26_1-p1	TGGT1_254370-t26_1-p1 [1180-1197]	TGGT1_254370-t26_1-p1 3xPhospho [S1186(100); S1192(100); S1194(0); S1196(100)]	TGGT1_254370-t26_1-p1 3xPhospho [S1186(100); S1192(100); S1196(100)]	transcript=TGGT1_254370-t26_1 | gene=TGGT1_254370 | organism=Toxoplasma_gondii_GT1 | gene_product=Guanylyl cyclase [Source:UniProtKB/TrEMBL;Acc:S7VVK4] | transcript_product=guanylyl cyclase | location=TGGT1_chrIII:1634182-1672467(+) | protein_length=4367 | sequence_SO=chromosome | SO=protein_coding_gene | is_pseudo=false	0	2420.15	18	1.063	1.159	1.486	1.659	1.762	1.921	2.465	1.701	2.061	2.572	0.09	0.21	0.57	0.73	0.82	0.94	1.3	0.77	1.04	1.36	0.915136	0.653391	0.151937	0.34692	0.160054	0.0618503	0.145754	0.0675387	0.0958887	0.120105	0.988561
FALSE	High	MLSEAEEDDILLR	[R].MLSEAEEDDILLR.[R]	1xTMTpro [N-Term]; 1xPhospho [S3(100)]	1xTMTpro [N-Term]; 1xPhospho [S3(100)]	1.37917e-05	5.34993e-05	1	1	2	TGGT1_273870-t26_1-p1	TGGT1_273870-t26_1-p1 [152-164]	TGGT1_273870-t26_1-p1 1xPhospho [S154(100)]	TGGT1_273870-t26_1-p1 1xPhospho [S154(100)]	transcript=TGGT1_273870-t26_1 | gene=TGGT1_273870 | organism=Toxoplasma_gondii_GT1 | gene_product=SWI2/SNF2 ISWI-like (AT hook) [Source:UniProtKB/TrEMBL;Acc:S7V4B2] | transcript_product=SWI2/SNF2 ISWI-like (AT hook) | location=TGGT1_chrVIII:3198884-3213308(+) | protein_length=1556 | sequence_SO=chromosome | SO=protein_coding_gene | is_pseudo=false	0	1917.92	13
FALSE	High	MLSEAEEDDILLR	[R].MLSEAEEDDILLR.[R]	1xOxidation [M1]; 1xTMTpro [N-Term]; 1xPhospho [S3(100)]	1xOxidation [M1]; 1xTMTpro [N-Term]; 1xPhospho [S3(100)]	3.18602e-05	5.34993e-05	1	1	1	TGGT1_273870-t26_1-p1	TGGT1_273870-t26_1-p1 [152-164]	TGGT1_273870-t26_1-p1 1xPhospho [S154(100)]	TGGT1_273870-t26_1-p1 1xPhospho [S154(100)]	transcript=TGGT1_273870-t26_1 | gene=TGGT1_273870 | organism=Toxoplasma_gondii_GT1 | gene_product=SWI2/SNF2 ISWI-like (AT hook) [Source:UniProtKB/TrEMBL;Acc:S7V4B2] | transcript_product=SWI2/SNF2 ISWI-like (AT hook) | location=TGGT1_chrVIII:3198884-3213308(+) | protein_length=1556 | sequence_SO=chromosome | SO=protein_coding_gene | is_pseudo=false	0	1933.91	13
FALSE	High	MLSTLLSAER	[R].MLSTLLSAER.[I]	1xTMTpro [N-Term]; 1xPhospho [S3(100)]	1xTMTpro [N-Term]; 1xPhospho [S3(100); T4(0); S7(0)]	0.000205018	5.34993e-05	1	1	1	TGGT1_297070-t26_1-p1	TGGT1_297070-t26_1-p1 [341-350]	TGGT1_297070-t26_1-p1 1xPhospho [S343(100); T344(0); S347(0)]	TGGT1_297070-t26_1-p1 1xPhospho [S343(100)]	transcript=TGGT1_297070-t26_1 | gene=TGGT1_297070 | organism=Toxoplasma_gondii_GT1 | gene_product=Alpha-carbonic anhydrase domain-containing protein [Source:UniProtKB/TrEMBL;Acc:A0A125YMC5] | transcript_product=hypothetical protein | location=TGGT1_chrII:1492810-1494671(-) | protein_length=519 | sequence_SO=chromosome | SO=protein_coding_gene | is_pseudo=false	0	1504.78	10	0.916	1.017	0.938	0.995	0.911	1.012	0.933	0.909	0.852	0.898	-0.13	0.02	-0.09	-0.01	-0.13	0.02	-0.1	-0.14	-0.23	-0.16	0.065741	0.627284	0.670548	0.963706	0.514446	0.875593	0.222077	0.177522	0.17986	0.0433218	0.8946
FALSE	High	MMSHTLTHDGGAAR	[R].MMSHTLTHDGGAAR.[D]	1xTMTpro [N-Term]; 1xPhospho [S3(99.5)]	1xTMTpro [N-Term]; 1xPhospho [S3(99.5); T5(0.5); T7(0)]	0.000165806	5.34993e-05	1	1	1	TGGT1_232040-t26_1-p1	TGGT1_232040-t26_1-p1 [270-283]	TGGT1_232040-t26_1-p1 1xPhospho [S272(99.5); T274(0.5); T276(0)]	TGGT1_232040-t26_1-p1 1xPhospho [S272(99.5)]	transcript=TGGT1_232040-t26_1 | gene=TGGT1_232040 | organism=Toxoplasma_gondii_GT1 | gene_product=hypothetical protein | transcript_product=hypothetical protein | location=TGGT1_chrVIII:1775251-1777362(+) | protein_length=703 | sequence_SO=chromosome | SO=protein_coding_gene | is_pseudo=false	0	1868.85	14
FALSE	High	MMTEEAWQWHQDYYQATIR	[R].MMTEEAWQWHQDYYQATIR.[S]	1xTMTpro [N-Term]; 1xPhospho [T3(100)]	1xTMTpro [N-Term]; 1xPhospho [T3(100); Y13(0); Y14(0); T17(0)]	9.75247e-16	5.34993e-05	1	1	1	TGGT1_259630-t26_1-p1	TGGT1_259630-t26_1-p1 [72-90]	TGGT1_259630-t26_1-p1 1xPhospho [T74(100); Y84(0); Y85(0); T88(0)]	TGGT1_259630-t26_1-p1 1xPhospho [T74(100)]	transcript=TGGT1_259630-t26_1 | gene=TGGT1_259630 | organism=Toxoplasma_gondii_GT1 | gene_product=hypothetical protein | transcript_product=hypothetical protein | location=TGGT1_chrVIIb:2722823-2724032(+) | protein_length=160 | sequence_SO=chromosome | SO=protein_coding_gene | is_pseudo=false	0	2871.26	19	0.916	1.221	1.258	0.851	0.78	1.04	1.071	0.769	0.874	1.033	-0.13	0.29	0.33	-0.23	-0.36	0.06	0.1	-0.38	-0.19	0.05	0.688822	0.306011	0.302948	0.450483	0.562419	0.897914	0.173544	0.563745	0.284872	0.907233	0.95308
FALSE	High	MMTEEAWQWHQDYYQATIR	[R].MMTEEAWQWHQDYYQATIR.[S]	1xOxidation [M]; 1xTMTpro [N-Term]; 1xPhospho [T3(100)]	1xOxidation [M1; M2]; 1xTMTpro [N-Term]; 1xPhospho [T3(100); Y13(0); Y14(0); T17(0)]	1.22667e-11	5.34993e-05	1	1	2	TGGT1_259630-t26_1-p1	TGGT1_259630-t26_1-p1 [72-90]	TGGT1_259630-t26_1-p1 1xPhospho [T74(100); Y84(0); Y85(0); T88(0)]	TGGT1_259630-t26_1-p1 1xPhospho [T74(100)]	transcript=TGGT1_259630-t26_1 | gene=TGGT1_259630 | organism=Toxoplasma_gondii_GT1 | gene_product=hypothetical protein | transcript_product=hypothetical protein | location=TGGT1_chrVIIb:2722823-2724032(+) | protein_length=160 | sequence_SO=chromosome | SO=protein_coding_gene | is_pseudo=false	0	2887.25	19	0.959	0.946	1.011	1.112	1.066	1.051	1.124	1.136	1.063	1.043	-0.06	-0.08	0.02	0.15	0.09	0.07	0.17	0.18	0.09	0.06	0.601346	0.568607	0.288911	0.0479616	0.42744	0.565695	0.0729766	0.398424	0.107067	0.0415379	0.939542
FALSE	High	MNGTADAHSEQSSR	[K].MNGTADAHSEQSSR.[Q]	1xTMTpro [N-Term]; 1xPhospho [S9(99.8)]	1xTMTpro [N-Term]; 1xPhospho [T4(0); S9(99.8); S12(0.3); S13(0)]	5.25048e-07	5.34993e-05	1	1	3	TGGT1_243200-t26_1-p1	TGGT1_243200-t26_1-p1 [57-70]	TGGT1_243200-t26_1-p1 1xPhospho [T60(0); S65(99.8); S68(0.3); S69(0)]	TGGT1_243200-t26_1-p1 1xPhospho [S65(99.8)]	transcript=TGGT1_243200-t26_1 | gene=TGGT1_243200 | organism=Toxoplasma_gondii_GT1 | gene_product=hypothetical protein | transcript_product=hypothetical protein | location=TGGT1_chrVI:2355009-2359636(-) | protein_length=1258 | sequence_SO=chromosome | SO=protein_coding_gene | is_pseudo=false	0	1874.8	14	1.099	0.948	0.576	0.915	1.005	0.867	0.527	0.796	0.532	0.601	0.14	-0.08	-0.8	-0.13	0.01	-0.21	-0.92	-0.33	-0.91	-0.74	0.283423	0.660238	0.0683757	0.738874	0.981423	0.428769	0.249512	0.142127	0.132907	0.241068	0.904439
FALSE	High	MNISFGADQVWNSDSGARPSFSDVPFGR	[K].MNISFGADQVWNSDSGARPSFSDVPFGR.[S]	1xTMTpro [N-Term]; 1xPhospho [S20(100)]	1xTMTpro [N-Term]; 1xPhospho [S4(0); S13(0); S15(0); S20(100); S22(0)]	1.99938e-11	5.34993e-05	1	1	2	TGGT1_295360-t26_1-p1	TGGT1_295360-t26_1-p1 [131-158]	TGGT1_295360-t26_1-p1 1xPhospho [S134(0); S143(0); S145(0); S150(100); S152(0)]	TGGT1_295360-t26_1-p1 1xPhospho [S150(100)]	transcript=TGGT1_295360-t26_1 | gene=TGGT1_295360 | organism=Toxoplasma_gondii_GT1 | gene_product=hypothetical protein | transcript_product=hypothetical protein | location=TGGT1_chrIa:1791407-1792949(+) | protein_length=268 | sequence_SO=chromosome | SO=protein_coding_gene | is_pseudo=false	0	3428.57	28	1.14	1.073	0.698	0.637	0.726	0.684	0.445	0.809	0.824	0.708	0.19	0.1	-0.52	-0.65	-0.46	-0.55	-1.17	-0.31	-0.28	-0.5	0.639713	0.859004	0.502995	0.01671	0.347078	0.42696	0.260494	0.366675	0.350934	0.050165	0.947964
FALSE	High	MNISFGADQVWNSDSGARPSFSDVPFGR	[K].MNISFGADQVWNSDSGARPSFSDVPFGR.[S]	1xOxidation [M1]; 1xTMTpro [N-Term]; 1xPhospho [S]	1xOxidation [M1]; 1xTMTpro [N-Term]; 1xPhospho [S4(0); S13(0); S15(49.9); S20(49.9); S22(0.3)]	2.57472e-15	5.34993e-05	1	1	2	TGGT1_295360-t26_1-p1	TGGT1_295360-t26_1-p1 [131-158]			transcript=TGGT1_295360-t26_1 | gene=TGGT1_295360 | organism=Toxoplasma_gondii_GT1 | gene_product=hypothetical protein | transcript_product=hypothetical protein | location=TGGT1_chrIa:1791407-1792949(+) | protein_length=268 | sequence_SO=chromosome | SO=protein_coding_gene | is_pseudo=false	0	3444.56	28	1.093	1.051	1.014	0.773	0.845	0.813	0.784	0.823	0.938	0.839	0.13	0.07	0.02	-0.37	-0.24	-0.3	-0.35	-0.28	-0.09	-0.25	0.139698	0.577292	0.943341	0.348702	0.435339	0.26927	0.0105952	0.48227	0.355891	0.170131	0.8946
FALSE	High	MNISFGADQVWNSDSGARPSFSDVPFGR	[K].MNISFGADQVWNSDSGARPSFSDVPFGR.[S]	1xOxidation [M1]; 1xTMTpro [N-Term]; 2xPhospho [S4(100); S]	1xOxidation [M1]; 1xTMTpro [N-Term]; 2xPhospho [S4(100); S13(0.5); S15(0.5); S20(49.5); S22(49.5)]	4.68365e-06	5.34993e-05	1	1	1	TGGT1_295360-t26_1-p1	TGGT1_295360-t26_1-p1 [131-158]	TGGT1_295360-t26_1-p1 2xPhospho [S134(100); S143(0.5); S145(0.5); S150(49.5); S152(49.5)]	TGGT1_295360-t26_1-p1 2xPhospho [S134(100); S]	transcript=TGGT1_295360-t26_1 | gene=TGGT1_295360 | organism=Toxoplasma_gondii_GT1 | gene_product=hypothetical protein | transcript_product=hypothetical protein | location=TGGT1_chrIa:1791407-1792949(+) | protein_length=268 | sequence_SO=chromosome | SO=protein_coding_gene | is_pseudo=false	0	3524.53	28	1.24	1.035	1.137	1.36	1.687	1.408	1.547	1.691	1.386	1.293	0.31	0.05	0.19	0.44	0.75	0.49	0.63	0.76	0.47	0.37	0.717385	0.812433	0.559755	0.147349	0.400087	0.0779008	0.119091	0.264404	0.486995	0.521322	0.959114
FALSE	High	MNMLSPPVSPRPGHAGENELPPGASSPATLAAPGGVR	[R].MNMLSPPVSPRPGHAGENELPPGASSPATLAAPGGVR.[S]	1xTMTpro [N-Term]; 2xPhospho [S5(100); S9(100)]	1xTMTpro [N-Term]; 2xPhospho [S5(100); S9(100); S25(0); S26(0); T29(0)]	2.28185e-10	5.34993e-05	1	1	2	TGGT1_259200B-t26_1-p1	TGGT1_259200B-t26_1-p1 [720-756]	TGGT1_259200B-t26_1-p1 2xPhospho [S724(100); S728(100); S744(0); S745(0); T748(0)]	TGGT1_259200B-t26_1-p1 2xPhospho [S724(100); S728(100)]	transcript=TGGT1_259200B-t26_1 | gene=TGGT1_259200B | organism=Toxoplasma_gondii_GT1 | gene_product=Na+/H+ exchanger NHE1 [Source:UniProtKB/TrEMBL;Acc:S7WEL3] | transcript_product=Na+/H+ exchanger NHE1 | location=TGGT1_chrVIIb:2842786-2849857(-) | protein_length=1450 | sequence_SO=chromosome | SO=protein_coding_gene | is_pseudo=false	0	4083.95	37	0.905	0.712	0.71	0.941	0.851	0.669	0.668	0.759	0.595	0.716	-0.14	-0.49	-0.49	-0.09	-0.23	-0.58	-0.58	-0.4	-0.75	-0.48	0.125221	0.145353	0.195896	0.774842	0.544027	0.348124	0.0880416	0.108855	0.154475	0.00569095	0.8946
FALSE	High	MNMLSPPVSPRPGHAGENELPPGASSPATLAAPGGVR	[R].MNMLSPPVSPRPGHAGENELPPGASSPATLAAPGGVR.[S]	1xOxidation [M3]; 1xTMTpro [N-Term]; 2xPhospho [S5(100); S9(100)]	1xOxidation [M3]; 1xTMTpro [N-Term]; 2xPhospho [S5(100); S9(100); S25(0); S26(0); T29(0)]	8.44752e-08	5.34993e-05	1	1	1	TGGT1_259200B-t26_1-p1	TGGT1_259200B-t26_1-p1 [720-756]	TGGT1_259200B-t26_1-p1 2xPhospho [S724(100); S728(100); S744(0); S745(0); T748(0)]	TGGT1_259200B-t26_1-p1 2xPhospho [S724(100); S728(100)]	transcript=TGGT1_259200B-t26_1 | gene=TGGT1_259200B | organism=Toxoplasma_gondii_GT1 | gene_product=Na+/H+ exchanger NHE1 [Source:UniProtKB/TrEMBL;Acc:S7WEL3] | transcript_product=Na+/H+ exchanger NHE1 | location=TGGT1_chrVIIb:2842786-2849857(-) | protein_length=1450 | sequence_SO=chromosome | SO=protein_coding_gene | is_pseudo=false	0	4099.95	37	1.159	0.963	0.851	0.775	0.898	0.746	0.659	0.813	0.673	0.7	0.21	-0.05	-0.23	-0.37	-0.16	-0.42	-0.6	-0.3	-0.57	-0.51	0.551611	0.933039	0.520187	0.649138	0.73288	0.116127	0.336069	0.493842	0.0307568	0.249002	0.933386
FALSE	High	MNMLSPPVSPRPGHAGENELPPGASSPATLAAPGGVR	[R].MNMLSPPVSPRPGHAGENELPPGASSPATLAAPGGVR.[S]	1xTMTpro [N-Term]; 3xPhospho [S5(100); S9(100); S/T]	1xTMTpro [N-Term]; 3xPhospho [S5(100); S9(100); S25(49.8); S26(49.8); T29(0.5)]	0.000267609	5.34993e-05	1	1	1	TGGT1_259200B-t26_1-p1	TGGT1_259200B-t26_1-p1 [720-756]	TGGT1_259200B-t26_1-p1 3xPhospho [S724(100); S728(100); S744(49.8); S745(49.8); T748(0.5)]	TGGT1_259200B-t26_1-p1 3xPhospho [S724(100); S728(100); S/T]	transcript=TGGT1_259200B-t26_1 | gene=TGGT1_259200B | organism=Toxoplasma_gondii_GT1 | gene_product=Na+/H+ exchanger NHE1 [Source:UniProtKB/TrEMBL;Acc:S7WEL3] | transcript_product=Na+/H+ exchanger NHE1 | location=TGGT1_chrVIIb:2842786-2849857(-) | protein_length=1450 | sequence_SO=chromosome | SO=protein_coding_gene | is_pseudo=false	0	4163.92	37
FALSE	High	MKPGAGGGPGTPGSPPTFPFTQGLQLFR	[K].MKPGAGGGPGTPGSPPTFPFTQGLQLFR.[R]	1xOxidation [M1]; 1xTMTpro [K2]; 1xTMTpro [N-Term]; 1xPhospho [S14(99.3)]	1xOxidation [M1]; 1xTMTpro [K2]; 1xTMTpro [N-Term]; 1xPhospho [T11(0.7); S14(99.3); T17(0); T21(0)]	0.000272891	5.34993e-05	1	1	1	TGGT1_279320-t26_1-p1	TGGT1_279320-t26_1-p1 [2511-2538]	TGGT1_279320-t26_1-p1 1xPhospho [T2521(0.7); S2524(99.3); T2527(0); T2531(0)]	TGGT1_279320-t26_1-p1 1xPhospho [S2524(99.3)]	transcript=TGGT1_279320-t26_1 | gene=TGGT1_279320 | organism=Toxoplasma_gondii_GT1 | gene_product=hypothetical protein | transcript_product=hypothetical protein | location=TGGT1_chrIX:99003-113921(-) | protein_length=4972 | sequence_SO=chromosome | SO=protein_coding_gene | is_pseudo=false	0	3504.8	28
FALSE	High	NESPESGHDATAQR	[K].NESPESGHDATAQR.[K]	1xTMTpro [N-Term]; 1xPhospho [S3(100)]	1xTMTpro [N-Term]; 1xPhospho [S3(100); S6(0); T11(0)]	2.96574e-10	5.34993e-05	1	1	6	TGGT1_232280-t26_1-p1	TGGT1_232280-t26_1-p1 [199-212]	TGGT1_232280-t26_1-p1 1xPhospho [S201(100); S204(0); T209(0)]	TGGT1_232280-t26_1-p1 1xPhospho [S201(100)]	transcript=TGGT1_232280-t26_1 | gene=TGGT1_232280 | organism=Toxoplasma_gondii_GT1 | gene_product=IMP2_N domain-containing protein [Source:UniProtKB/TrEMBL;Acc:S7WBN4] | transcript_product=hypothetical protein | location=TGGT1_chrVIII:1988375-1990326(+) | protein_length=275 | sequence_SO=chromosome | SO=protein_coding_gene | is_pseudo=false	0	1882.83	14	0.927	0.928	1.007	1.068	0.99	0.991	1.075	0.944	0.898	0.949	-0.11	-0.11	0.01	0.09	-0.01	-0.01	0.1	-0.08	-0.16	-0.08	0.241422	0.348058	0.898401	0.144534	0.623873	0.905285	0.225966	0.60642	0.213926	0.648374	0.900211
FALSE	High	LSESPVANAEESR	[K].LSESPVANAEESR.[V]	1xTMTpro [N-Term]; 1xPhospho [S4(100)]	1xTMTpro [N-Term]; 1xPhospho [S2(0); S4(100); S12(0)]	3.88472e-05	5.34993e-05	1	1	5	TGGT1_314100-t26_1-p1	TGGT1_314100-t26_1-p1 [11-23]	TGGT1_314100-t26_1-p1 1xPhospho [S12(0); S14(100); S22(0)]	TGGT1_314100-t26_1-p1 1xPhospho [S14(100)]	transcript=TGGT1_314100-t26_1 | gene=TGGT1_314100 | organism=Toxoplasma_gondii_GT1 | gene_product=TPR_REGION domain-containing protein [Source:UniProtKB/TrEMBL;Acc:S7W2F0] | transcript_product=tetratricopeptide repeat-containing protein | location=TGGT1_chrXI:3881643-3887836(+) | protein_length=580 | sequence_SO=chromosome | SO=protein_coding_gene | is_pseudo=false	0	1772.84	13
FALSE	High	LSEPMSSFEVLPESETR	[R].LSEPMSSFEVLPESETR.[Q]	1xTMTpro [N-Term]; 1xPhospho [S/T]	1xTMTpro [N-Term]; 1xPhospho [S2(0); S6(50); S7(50); S14(0); T16(0)]	1.32327e-07	5.34993e-05	1	1	2	TGGT1_273690-t26_1-p1	TGGT1_273690-t26_1-p1 [33-49]			transcript=TGGT1_273690-t26_1 | gene=TGGT1_273690 | organism=Toxoplasma_gondii_GT1 | gene_product=Protein kinase domain-containing protein [Source:UniProtKB/TrEMBL;Acc:S7V3G0] | transcript_product=Wee kinase | location=TGGT1_chrVIII:3311171-3315776(-) | protein_length=794 | sequence_SO=chromosome | SO=protein_coding_gene | is_pseudo=false	0	2322.09	17	0.987	1.141	1.036	1.031	1.017	1.176	1.068	0.664	1.212	1.153	-0.02	0.19	0.05	0.04	0.02	0.23	0.1	-0.59	0.28	0.21	0.844125	0.279167	0.468905	0.90939	0.959553	0.658618	0.775129	0.0830762	0.477721	0.00442897	0.977542
[truncated: 21,894 more rows]
[truncated: 184 more columns]

## Sheet: 1.2_ZAP_enriched_AUCdiff_R1
	Checked	Confidence	Sequence	Annotated.Sequence	Modifications	Modifications..all.possible.sites.	Qvality.PEP	Qvality.q.value	X..Protein.Groups	X..Proteins	X..PSMs	Master.Protein.Accessions	Positions.in.Master.Proteins	Modifications.in.Master.Proteins..all.Sites.	Modifications.in.Master.Proteins	Master.Protein.Descriptions	X..Missed.Cleavages	Theo..MH...Da.	Sequence.Length	Abundance.Ratio...IAA..9.....IAA..0.	Abundance.Ratio...IAA..30.....IAA..0.	Abundance.Ratio...IAA..300.....IAA..0.	Abundance.Ratio...IAA..0.....PBS..0.	Abundance.Ratio...IAA..9.....PBS..0.	Abundance.Ratio...IAA..30.....PBS..0.	Abundance.Ratio...IAA..300.....PBS..0.	Abundance.Ratio...PBS..9.....PBS..0.	Abundance.Ratio...PBS..30.....PBS..0.	Abundance.Ratio...PBS..300.....PBS..0.	Abundance.Ratio..log2....IAA..9.....IAA..0.	Abundance.Ratio..log2....IAA..30.....IAA..0.	Abundance.Ratio..log2....IAA..300.....IAA..0.	Abundance.Ratio..log2....IAA..0.....PBS..0.	Abundance.Ratio..log2....IAA..9.....PBS..0.	Abundance.Ratio..log2....IAA..30.....PBS..0.	Abundance.Ratio..log2....IAA..300.....PBS..0.	Abundance.Ratio..log2....PBS..9.....PBS..0.	Abundance.Ratio..log2....PBS..30.....PBS..0.	Abundance.Ratio..log2....PBS..300.....PBS..0.	Abundance.Ratio.P.Value...IAA..9.....IAA..0.	Abundance.Ratio.P.Value...IAA..30.....IAA..0.	Abundance.Ratio.P.Value...IAA..300.....IAA..0.	Abundance.Ratio.P.Value...IAA..0.....PBS..0.	Abundance.Ratio.P.Value...IAA..9.....PBS..0.	Abundance.Ratio.P.Value...IAA..30.....PBS..0.	Abundance.Ratio.P.Value...IAA..300.....PBS..0.	Abundance.Ratio.P.Value...PBS..9.....PBS..0.	Abundance.Ratio.P.Value...PBS..30.....PBS..0.	Abundance.Ratio.P.Value...PBS..300.....PBS..0.
[truncated: 10,827 more rows]
[truncated: 197 more columns]

[truncated: 3 more sheets: 1.3_ZAP_enriched_AUCdiff_R2, 1.4_ZAP_enriched_AUCpbs_R1_R2, 1.5_ZAPdependent_Groups]
