# Supplementary material for: Analysis of CDPK1 targets identifies a trafficking adaptor complex that regulates microneme exocytosis in Toxoplasma
Source: eLife. 2023 Nov 7;12:RP85654. doi: 10.7554/eLife.85654 (PMC10629828; doi:10.7554/eLife.85654)
Supplement: Supplementary file 2. [file elife-85654-supp2.xlsx]

## Sheet: 2_ZAP_proteome_RAW
Checked	Protein FDR Confidence: Combined	Master	Accession	Description	Sequence	Exp. q-value: Combined	Sum PEP Score	Coverage [%]	# Peptides	# PSMs	# Unique Peptides	# AAs	MW [kDa]	calc. pI	Score Sequest HT: Sequest HT	# Peptides (by Search Engine): Sequest HT	Abundance Ratio: (IAA, 9) / (IAA, 0)	Abundance Ratio: (IAA, 30) / (IAA, 0)	Abundance Ratio: (IAA, 300) / (IAA, 0)	Abundance Ratio: (IAA, 0) / (PBS, 0)	Abundance Ratio: (IAA, 9) / (PBS, 0)	Abundance Ratio: (IAA, 30) / (PBS, 0)	Abundance Ratio: (IAA, 300) / (PBS, 0)	Abundance Ratio: (PBS, 9) / (PBS, 0)	Abundance Ratio: (PBS, 30) / (PBS, 0)	Abundance Ratio: (PBS, 300) / (PBS, 0)	Abundance Ratio (log2): (IAA, 9) / (IAA, 0)	Abundance Ratio (log2): (IAA, 30) / (IAA, 0)	Abundance Ratio (log2): (IAA, 300) / (IAA, 0)	Abundance Ratio (log2): (IAA, 0) / (PBS, 0)	Abundance Ratio (log2): (IAA, 9) / (PBS, 0)	Abundance Ratio (log2): (IAA, 30) / (PBS, 0)	Abundance Ratio (log2): (IAA, 300) / (PBS, 0)	Abundance Ratio (log2): (PBS, 9) / (PBS, 0)	Abundance Ratio (log2): (PBS, 30) / (PBS, 0)	Abundance Ratio (log2): (PBS, 300) / (PBS, 0)	Abundance Ratio P-Value: (IAA, 9) / (IAA, 0)	Abundance Ratio P-Value: (IAA, 30) / (IAA, 0)	Abundance Ratio P-Value: (IAA, 300) / (IAA, 0)	Abundance Ratio P-Value: (IAA, 0) / (PBS, 0)	Abundance Ratio P-Value: (IAA, 9) / (PBS, 0)	Abundance Ratio P-Value: (IAA, 30) / (PBS, 0)	Abundance Ratio P-Value: (IAA, 300) / (PBS, 0)	Abundance Ratio P-Value: (PBS, 9) / (PBS, 0)	Abundance Ratio P-Value: (PBS, 30) / (PBS, 0)	Abundance Ratio P-Value: (PBS, 300) / (PBS, 0)	Abundance Ratio Adj. P-Value: (IAA, 9) / (IAA, 0)	Abundance Ratio Adj. P-Value: (IAA, 30) / (IAA, 0)	Abundance Ratio Adj. P-Value: (IAA, 300) / (IAA, 0)
FALSE	High	Master Protein	TGGT1_253750-t26_1-p1	transcript=TGGT1_253750-t26_1 | gene=TGGT1_253750 | organism=Toxoplasma_gondii_GT1 | gene_product=PLU-1 domain-containing protein [Source:UniProtKB/TrEMBL;Acc:S7ULT6] | transcript_product=PLU-1 family protein | location=TGGT1_chrIII:1126566-1154665(-) | protein_length=8088 | sequence_SO=chromosome | SO=protein_coding_gene | is_pseudo=false	MSGRGAAASAAGKPGGDGGKPSGEDLAATVPEAAPSARPYMRVLGPASSRGGSNKSVRVDALTYQTWTNPYLPAGASAQELREEAEEALAAEADFDRQLLALDARLGTAREAKGTEQEAEGAEAECVRYGSEGEDGPGSAANTEGIDGGERMSHPETLQGPSKAEDAEETPKASEEGQVEAVARGHTAAHASVEEDGDDERAEAGGSSSRDRSPEGGWMPRSEDEAQNEDSQPLKTDDQGQSTPASRLHKQRPSREEGGDSGALASFHDAAVSTEEKSDGDTEEFRRRVKAESPVSAGLSPAPSSDQETSQGPDESREGSMGFLSWMKVPSSRGAPRQSVSPSGQRAVDSAASLPAPLSPIAVPVAQLVTPMPFKVFDSAPFLMRRAASPAGGKRNAGF…	0	390.107	17	109	141	109	8088	855.8	5.87	281.76	109	0.987	0.993	0.996	1.024	1.01	1.016	1.02	1	1.004	1.038	-0.02	-0.01	-0.01	0.03	0.01	0.02	0.03	0	0.01	0.05	0.698227	0.807999	0.704341	0.246248	0.657875	0.471927	0.0532386	0.985584	0.535446	0.140475	0.996674	0.995152	0.980327
FALSE	High	Master Protein	TGGT1_306060-t26_1-p1	transcript=TGGT1_306060-t26_1 | gene=TGGT1_306060 | organism=Toxoplasma_gondii_GT1 | gene_product=Rhoptry neck protein RON8 [Source:UniProtKB/TrEMBL;Acc:A0A125YNG1] | transcript_product=rhoptry neck protein RON8 | location=TGGT1_chrIX:5560917-5575203(-) | protein_length=2980 | sequence_SO=chromosome | SO=protein_coding_gene | is_pseudo=false	MVATTLHSLPSRYLYTLLMSFLFVCGALALHESPDGLPEAPDRPQNAESGDGPPTLVLTLDPEYAGKSEEFAFTAEYFPPTESSKNEDGAQQSFVETPNRRLPGAFDPMSSSDVRSEVQLRVTTQQMERGLLAEIVVLQEGQMVSGFRASLQTKEQAALLHRLADLTNDPNIHFRVEWRGRGDGTGGLYIRTAVHLLATAYKPSVHFKLNLHQTGARGARETIKLLSSVPIDDLNAPGVDIGTLKQLIVDHAEPENILTGPGSFSIKRMYKESDPKNANTQEATLVPWLLRLLDLASPVTIVGDLTRNREFSTVLPQGPANWNDLLLLYTGMGDAANRGQNAPDFAQREPGYRPGSIFLSPDGFRGAAHLGDHQPDRLKQFWRQGGETGLNPGDIEHYY…	0	364.85	31	80	177	80	2980	328.8	8.4	452.27	80	1.006	0.995	1.012	1.002	1.008	0.997	1.013	1.01	1.012	1.012	0.01	-0.01	0.02	0	0.01	0	0.02	0.01	0.02	0.02	0.597445	0.286471	0.138468	0.889152	0.0601017	0.827049	0.309558	0.305787	0.0636767	0.157912	0.996674	0.989773	0.971021
FALSE	High	Master Protein	TGGT1_311470-t26_1-p1	transcript=TGGT1_311470-t26_1 | gene=TGGT1_311470 | organism=Toxoplasma_gondii_GT1 | gene_product=Rhoptry neck protein RON5 [Source:UniProtKB/TrEMBL;Acc:S7W8Q7] | transcript_product=rhoptry neck protein RON5 | location=TGGT1_chrXI:2047692-2067010(-) | protein_length=1699 | sequence_SO=chromosome | SO=protein_coding_gene | is_pseudo=false	MAEFTWRPLLMSLPKMIAFFHILLFSGALAAAAGSPAADLVASVQTVSNERKDLYARDTQPTARTGIDIGVSFTQQASGNARTFEIRQHGSGPPRPAPRRAAAVADDIFGSEDFSPPPMNVAGAPLRDMGVHFLECQATDGKIECTGQGAGARPPFFRGGVDPTEIHEIVQSRTVGPADYDEERPEQTPDYLSPTDVVTLQRFVSSANASNSPLLEDPVQVCLSRRKPTYTCHLLHEFAATSVIVEESGNLVCEDKAPLTVAEKRKINDAVKAGRTPQATGGQSSRPPNPTVSPSKAGAAPQNAASRQPVSFVEQENNEASMPTANTEQASATTEDTKIASAATDSGDYGEAAAGESAQEGDRPPPYNPDADEAGVPRAVQEAYEEARPLQEATIDKFK…	0	330.318	41	53	129	53	1699	186.9	8.46	397.57	53	0.995	0.989	0.994	1.008	1.003	0.997	1.002	1.004	1.009	1.016	-0.01	-0.02	-0.01	0.01	0	0	0	0.01	0.01	0.02	0.262783	0.350663	0.0385888	0.852934	0.934708	0.936464	0.968397	0.911512	0.823101	0.457655	0.996674	0.990049	0.971021
FALSE	High	Master Protein	TGGT1_244560-t26_1-p1	transcript=TGGT1_244560-t26_1 | gene=TGGT1_244560 | organism=Toxoplasma_gondii_GT1 | gene_product=HATPase_c domain-containing protein [Source:UniProtKB/TrEMBL;Acc:S7VTT7] | transcript_product=putative heat shock protein 90 | location=TGGT1_chrVI:3273039-3276701(+) | protein_length=853 | sequence_SO=chromosome | SO=protein_coding_gene | is_pseudo=false	MSPAGRRTPKKLAFAALLLGVSVACTSSFFSASVSPSALWVAATETDAAEPLTAEEAPRSLPIDESEKAAAPLTAEEQEAVQKSQESHQYQTEVSRLMDIIINSLYTQREVFLRELISNAVDALEKVRFTALSHPEVLEPKKNLDIRIEFDADAKTLSIIDSGIGMTKQDLINNLGTVAKSGTSNFLEAMAQGNDVNLIGQFGVGFYSAFLVADKVTVVSKNVEDDQHIWESSADAKFHVAKDPRGNTLGRGTCVTLHLKEDATEFLNEWKLKDLTTRFSQFMSYPIYVRTSRTVTEEVPIEDEEAETKDEDKDKDEDKEKDEDKDKDDVEVTEGDKDEKKDKPKTKKVEKKKDEWEQVNTQKAIWLRPKEEIEEKEYNEFYKSVSKDWSDPLAHIHFS…	0	323.594	58	58	195	57	853	97.5	5.03	498.51	58	0.993	0.995	0.992	1.003	0.997	0.998	0.995	1.003	1.006	0.992	-0.01	-0.01	-0.01	0	-0.01	0	-0.01	0	0.01	-0.01	0.76402	0.010158	0.691721	0.911126	0.613994	0.943115	0.568553	0.935662	0.825451	0.745038	0.996674	0.989773	0.980327
FALSE	High	Master Protein	TGGT1_231970-t26_1-p1	transcript=TGGT1_231970-t26_1 | gene=TGGT1_231970 | organism=Toxoplasma_gondii_GT1 | gene_product=MPN domain-containing protein [Source:UniProtKB/TrEMBL;Acc:S7WJ21] | transcript_product=pre-mRNA processing splicing factor PRP8 | location=TGGT1_chrVIII:1677402-1691932(+) | protein_length=2538 | sequence_SO=chromosome | SO=protein_coding_gene | is_pseudo=false	MLPNGSGGGFRPPPPGGSGVHPGPPPGHPCSPAGHLPPGLPLPPPPGFLGFPGSLGPPSSSPPPPHPAGLFVPPQQGPPAPGASSVPGSSQRMPPGGMFMPPPGFAGFQQPGGARPMHLPPHAQARGGSGAPLGPKGSPGGAAGAPGLNGATPNPPASGKSPFYGKDVRRMETSSPYAGAPQAKIESGFGAPQPSVFSRYPPPLPGPGQVSAGPPKDLRAKVKTAEELLAEKARKWQQLNTKRYGEKSKLGTGQDTTKEEMPPEHLRKLIKDHGDMTSKKFRHDKRVYLGALKYVPHAVYKLLENMPMPWEQVRNVAVLYHITGAITFVNEIPWVVEPIYLAQWGTMWIMMRREKRDRRHFKRMRFPPFDDEEPPLDYGDNVLDVEPLEAIQMQLDEEE…	0	294.843	29	62	119	45	2538	291.6	9	325.51	62	1.009	0.986	1.009	0.989	0.998	0.975	0.998	0.991	1.01	1.021	0.01	-0.02	0.01	-0.02	0	-0.04	0	-0.01	0.01	0.03	0.843415	0.309696	0.721613	0.687785	0.919104	0.319349	0.440184	0.493147	0.744342	0.0119524	0.996674	0.989773	0.980327
FALSE	High	Master Protein	TGGT1_288380-t26_1-p1	transcript=TGGT1_288380-t26_1 | gene=TGGT1_288380 | organism=Toxoplasma_gondii_GT1 | gene_product=HATPase_c domain-containing protein [Source:UniProtKB/TrEMBL;Acc:A0A125YVB6] | transcript_product=heat shock protein HSP90 | location=TGGT1_chrIX:2294323-2298742(+) | protein_length=708 | sequence_SO=chromosome | SO=protein_coding_gene | is_pseudo=false	MADTETFAFNADIQQLMSLIINTFYSNKEIFLRELISNASDALDKIRYEAITDPEKLKGAERLFIRIVPNKQNNTLTIEDDGIGMTKAELVNNLGTIARSGTKAFMEALQAGGDISMIGQFGVGFYSAYLVADKVTVVSRHNDDEMYVWESSAGGSFTVSKAEGQFENIVRGTRIILHMKEDQTEYLEDRRLKDLVKKHSEFISFPIELAVEKSVDKEITESEDEEKPAEDAEEKKEEGEEEKKEEGAEKKKKTKKVKEVVVEYEQLNKQKPLWMRKPEDVTWEEYCAFYKSLTNDWEDPLAVKHFSVEGQLEFKALLFLPKRAPFDLFETRKKRNNVRLYVRRVFIMDDCEDLIPEWLNFVRGVVDSEDLPLNISRESLQQNKILKVIKKNLVKKCLE…	0	290.894	59	43	220	40	708	81.9	5.03	553.67	43	1.006	0.998	0.996	0.99	0.996	0.988	0.987	1.001	0.981	0.986	0.01	0	-0.01	-0.01	-0.01	-0.02	-0.02	0	-0.03	-0.02	0.620069	0.747762	0.719219	0.234261	0.616559	0.0945948	0.449182	0.985444	0.204626	0.275314	0.996674	0.995152	0.980327
FALSE	High	Master Protein	TGGT1_295710-t26_1-p1	transcript=TGGT1_295710-t26_1 | gene=TGGT1_295710 | organism=Toxoplasma_gondii_GT1 | gene_product=HECT-domain (Ubiquitin-transferase) domain-containing protein [Source:UniProtKB/TrEMBL;Acc:S7UJ61] | transcript_product=HECT-domain (ubiquitin-transferase) domain-containing protein | location=TGGT1_chrIa:1556788-1587317(-) | protein_length=8007 | sequence_SO=chromosome | SO=protein_coding_gene | is_…	MGKIPLSLSDNFQLAVSSLPETQRQLIEVLSSCPDEELLHHLQPFRGWMWEKQGDVTAWAPALNRFDDLMVAYARHKGLLAASEEKNASPTPHGDSPKAFVPSDELVLAVLETSCIVLENCSSKCLYSSVDVVTSLVDAFYLPIVCSAVQVLAVCYGFVKRNRRTGLPRECPELTARLPLLCESPVAYDAFVLTRQPDRSRIQLPGLLYDSGDSSPTETPVGSGDPAARGPGQRRDRERDREAAVGRGSSRRLQRGEEPRLPGESRAETDEFSVSPRRVDPLTFYLAERFPLDFEGFAEFQIIVTSAGAGTPTGSPLVTPAEVSPHLSGLAGREGESHETVPKKPEPSREAAAASAKKDEYSAPRVKTVRIPCVELMLPEASPEDGGAEASALGRRASK…	0	279.969	12	80	99	80	8007	840.8	5.21	207.64	80	0.998	1.005	1.005	1.012	1.009	1.017	1.017	1.013	0.982	1.006	0	0.01	0.01	0.02	0.01	0.02	0.02	0.02	-0.03	0.01	0.957007	0.896119	0.927133	0.812474	0.38972	0.176225	0.251253	0.484072	0.631275	0.80359	0.998956	0.998909	0.992295
FALSE	High	Master Protein	TGGT1_223920-t26_1-p1	transcript=TGGT1_223920-t26_1 | gene=TGGT1_223920 | organism=Toxoplasma_gondii_GT1 | gene_product=Rhoptry neck protein RON3 [Source:UniProtKB/TrEMBL;Acc:S7UWM8] | transcript_product=rhoptry neck protein RON3 | location=TGGT1_chrX:3357300-3367973(+) | protein_length=1958 | sequence_SO=chromosome | SO=protein_coding_gene | is_pseudo=false	MTTSPRVAKWALRVLALVFLHHVTVCTVCEAKALHVIRPHRNFAGLDVQQSSVADLQDEGKGISFAQTYRERDIWFGMLYFEYVITASTTMTLAFKSMAKYIYTAPFLTKLFASNRWLKYSTLDFQQKQQIIRKIARRASSKSLFTRALPDDRVADLFADMYLRRVTSRLSRTPGFRKPQYLRMKEDLTQLIKAANAPTEAMEVVLGNNTQDMFTWIDSVRQNPFATVKNVVVHAFENGLKGVSGMVEWELNQGCFAIAQQTRHILPFGSLFPGGILGKIMQKLMRSYIMFFHPVLANFKGLLALFLGVLCKVRLPQLINAVFGAIFRAKRRAGRYIHKFFFKTISLRKDITGKILVDDLVRGSGAVMITLLFQLHGVDIDAISRRGGAVESGVLAGQG…	0	274.818	32	57	136	57	1958	222.9	9.16	363.01	57	0.999	0.998	1.01	0.976	0.975	0.974	0.986	0.978	0.986	0.991	0	0	0.01	-0.04	-0.04	-0.04	-0.02	-0.03	-0.02	-0.01	0.891033	0.575408	0.75394	0.441544	0.304997	0.383013	0.166886	0.2801	0.494398	0.443673	0.996674	0.990049	0.982554
FALSE	High	Master Protein	P35579	Myosin-9 OS=Homo sapiens (Human) OX=9606 GN=MYH9 PE=1 SV=4	MAQQAADKYLYVDKNFINNPLAQADWAAKKLVWVPSDKSGFEPASLKEEVGEEAIVELVENGKKVKVNKDDIQKMNPPKFSKVEDMAELTCLNEASVLHNLKERYYSGLIYTYSGLFCVVINPYKNLPIYSEEIVEMYKGKKRHEMPPHIYAITDTAYRSMMQDREDQSILCTGESGAGKTENTKKVIQYLAYVASSHKSKKDQGELERQLLQANPILEAFGNAKTVKNDNSSRFGKFIRINFDVNGYIVGANIETYLLEKSRAIRQAKEERTFHIFYYLLSGAGEHLKTDLLLEPYNKYRFLSNGHVTIPGQQDKDMFQETMEAMRIMGIPEEEQMGLLRVISGVLQLGNIVFKKERNTDQASMPDNTAAQKVSHLLGINVTDFTRGILTPRIKVGRD…	0	260.89	29	57	113	49	1960	226.4	5.6	287.28	57	1.043	1.037	1.037	0.974	1.016	1.01	1.01	1.059	1.063	1.059	0.06	0.05	0.05	-0.04	0.02	0.01	0.01	0.08	0.09	0.08	0.251432	0.204619	0.0875606	0.338295	0.0797151	0.775824	0.714516	0.282706	0.0935934	0.196618	0.996674	0.989773	0.971021
FALSE	High	Master Protein	TGGT1_219540-t26_1-p1	transcript=TGGT1_219540-t26_1 | gene=TGGT1_219540 | organism=Toxoplasma_gondii_GT1 | gene_product=Alanine--tRNA ligase [Source:UniProtKB/TrEMBL;Acc:S7WHV1] | transcript_product=cytosolic tRNA-Ala synthetase | location=TGGT1_chrXII:800723-814444(-) | protein_length=1280 | sequence_SO=chromosome | SO=protein_coding_gene | is_pseudo=false	MLDVPILCALLVLLLSSLPAGAGALCVSLHRVSPSCLHSWEGGGCGFSSVSPPGRFASDCSERRRLPQPSLTTENVSASLNSGSALSSPPRRLSDFVRMQPRLLQERLFTDLSFLSRPRQTFSSSRLGVFSSPALSPLRSSSSATRVLLNFSRPARPRLCSRSPRHPSPSFCSSSTFPQSPSRSSLSSTWTSLLLSDVRLASGAASLSSPWESFSLITSAARRPDSRAFARIPLVPLSIHSGKMAMTEEERRAKIEEISAKGKAKGWSGEAVRGAYLEFFEAQGHLIYPSSPVIPRGDNTLLFINAGMNQFKPIFLGQIDRSSPLSKLRRVADTQKCIRAGGKHNDLEDVGKDVYHHTFFEMLGNWSFGDYFKREAIAWAWQLLTEVYKIPKDRLYASY…	0	259.868	40	50	165	50	1280	139.3	6.83	382.47	50	1.018	1.007	0.993	0.991	1.009	0.998	0.984	1.002	0.995	0.985	0.03	0.01	-0.01	-0.01	0.01	0	-0.02	0	-0.01	-0.02	0.473038	0.147361	0.632076	0.184819	0.638969	0.331172	0.29733	0.846911	0.444387	0.238929	0.996674	0.989773	0.975418
FALSE	High	Master Protein	TGGT1_311720-t26_1-p1	transcript=TGGT1_311720-t26_1 | gene=TGGT1_311720 | organism=Toxoplasma_gondii_GT1 | gene_product=Chaperonin protein BiP [Source:UniProtKB/TrEMBL;Acc:A0A125YJG4] | transcript_product=chaperonin protein BiP | location=TGGT1_chrXI:2188121-2191497(-) | protein_length=668 | sequence_SO=chromosome | SO=protein_coding_gene | is_pseudo=false	MTAAKKLSLFSLAALFCLLSVATLRPVAASDAEEGKVKDVVIGIDLGTTYSCVGVYRHGRVDIIPNDQGNRITPSYVAFTDDDRKIGEAAKNEATINPTNTLFDVKRLIGRRFNEKEVQKDKDLLPYEIINKDGKPYIRVMVKGEPKVLAPEEVSAMVLTKMKETAEQFLGKEVKNAVVTVPAYFNDAQRQATKDAGAIAGLNVIRIINEPTAAAIAYGLDKKNEKTILVYDLGGGTFDVSVLVIDNGVFEVLATSGDTHLGGEDFDQRVMDHFIKLVKKKYDKDLRTDKRGLQKLRREVERAKRALSSQHQAKVEVENLMEGVDFSETLTRAKFEELNSDLFQKTLKPVKQVLEDADLQKSQVDEIVLVGGSTRIPKIQQLIKDFFNGKEPNRGINPD…	0	253.35	52	36	179	33	668	73.2	5.38	559.18	36	1.009	0.986	0.98	0.986	0.995	0.972	0.966	0.973	0.974	1.003	0.01	-0.02	-0.03	-0.02	-0.01	-0.04	-0.05	-0.04	-0.04	0	0.735607	0.422055	0.615371	0.74208	0.943567	0.412094	0.057801	0.301961	0.153216	0.260164	0.996674	0.990049	0.975418
FALSE	High	Master Protein	TGGT1_273760-t26_1-p1	transcript=TGGT1_273760-t26_1 | gene=TGGT1_273760 | organism=Toxoplasma_gondii_GT1 | gene_product=Heat shock protein HSP70 [Source:UniProtKB/TrEMBL;Acc:A0A125YP12] | transcript_product=heat shock protein HSP70 | location=TGGT1_chrVIII:3285695-3287698(-) | protein_length=667 | sequence_SO=chromosome | SO=protein_coding_gene | is_pseudo=false	MADSPAVGIDLGTTYSCVGVWKNDAVEIIANDQGNRTTPSYVAFTDTERLVGDAAKNQVARNPENTIFDAKRLIGRKFDDPSVQSDMKHWPFKVIAGPGDKPLIEVTYQGEKKTFHPEEVSAMVLGKMKEIAEAYLGKEVKEAVITVPAYFNDSQRQATKDAGTIAGLSVLRIINEPTAAAIAYGLDKKGCGEMNVLIFDMGGGTFDVSLLTIEDGIFEVKATAGDTHLGGEDFDNRLVDFCVQDFKRKNRGKDISTNSRALRRLRTQCERTKRTLSSSTQATIEIDSLFEGIDYSVSISRARFEELCMDYFRNSLLPVEKVLKDSGIDKRSVSEVVLVGGSTRIPKIQQLITDFFNGKEPCRSINPDEAVAYGAAVQAAILKGVTSSQVQDLLLLDVA…	0	252.288	56	35	176	28	667	72.2	5.2	447.76	35	0.985	0.973	0.965	0.997	0.982	0.971	0.962	0.972	0.983	0.982	-0.02	-0.04	-0.05	0	-0.03	-0.04	-0.06	-0.04	-0.03	-0.03	0.411354	0.173214	0.103918	0.94333	0.730729	0.556382	0.332654	0.369581	0.186666	0.313653	0.996674	0.989773	0.971021
FALSE	High	Master Protein	TGGT1_312630-t26_1-p1	transcript=TGGT1_312630-t26_1 | gene=TGGT1_312630 | organism=Toxoplasma_gondii_GT1 | gene_product=Putative anonymous antigen-1 [Source:UniProtKB/TrEMBL;Acc:S7W1P0] | transcript_product=putative anonymous antigen-1 | location=TGGT1_chrXI:2804165-2821550(-) | protein_length=2639 | sequence_SO=chromosome | SO=protein_coding_gene | is_pseudo=false	MAIGKVKRNPDAGVATAVQSVIQHQTFKRMLLFGLRSLADFCSPSNQLYQENALDALDRGVLSAIQTAVTTFSDDDDLMLCASRVLWAMSVAIKEEMDPAHIARVHSEGSPVIVAVVNSSPTDPQTIEDSMNFVDNLKRAGAPVDGASLAGGMLSIFTKTALDMKTAKRVTAALAIAAETAEGSTALYNAGGTSVLLTYCLDQGDLSDAGVEMVEGAFDTVRYMAGYQCTDATTLPQCIALMDKYRGRKSASAKGSSALAAMIGPEQLQKCLNTLKTAEAGSAEYDEALVTLGSMSYISSFTDEIVRAGGVPLLIELINSGLPQMEGNPEKIASMISGAAKMLARIASNPVNVDAIVQAGGVATLCTAVSYCTESMEALGALCMALVPLASRESLAHEI…	0	252.215	21	45	127	45	2639	286	5	349.65	45	0.973	0.97	0.943	1.042	1.013	1.011	0.983	1.016	1.016	1.019	-0.04	-0.04	-0.08	0.06	0.02	0.02	-0.03	0.02	0.02	0.03	0.317063	0.138026	0.0836646	0.152852	0.233186	0.193296	0.501327	0.614309	0.445885	0.501534	0.996674	0.989773	0.971021
FALSE	High	Master Protein	TGGT1_290950-t26_1-p1	transcript=TGGT1_290950-t26_1 | gene=TGGT1_290950 | organism=Toxoplasma_gondii_GT1 | gene_product=Clathrin heavy chain [Source:UniProtKB/TrEMBL;Acc:A0A125YSB0] | transcript_product=putative clathrin heavy chain | location=TGGT1_chrIX:3770246-3782423(-) | protein_length=1731 | sequence_SO=chromosome | SO=protein_coding_gene | is_pseudo=false	MAQQFPIQLHSVVNLADQGVSASSFRFGNVAMHGDKNLVVKDTETNELFIFSLSVREVHEGRVSPSSPGFSFTKKPTQAEAALMHPSEKVVALRAKTEGSAGHMIQVLNLETKVRLGTAQMNEPVVYWRWVAPTLLALVTDRAVYHWTVGENGETTAEPEKVCSREGRLADAVQIISYAVDKDLKWCILTGISTQDGGKTIDGSMQLYSMELKKQQQLEGHAACFNNIVIDEAVGPQPVICFTEKKRGSPDFKLHIRDIYSSRDGGQTPLRLAVDLRMPEDAPTDFPLSIHISQKFGVVYIVTKGGYLILLDALTGTELFRHRILQDAVFLATDSPQTGGILTVNKRGLVCLCNINLQALIPYINQALVYVPNRQQIATSLAKRYGLPGAEETLMQEFN…	0	248.845	31	48	114	48	1731	194.4	6.06	299.23	48	0.979	0.968	0.979	1.029	1.008	0.996	1.008	1.013	1.026	1.005	-0.03	-0.05	-0.03	0.04	0.01	-0.01	0.01	0.02	0.04	0.01	0.204217	0.495378	0.361666	0.173671	0.691904	0.897419	0.363735	0.352926	0.00227013	0.337759	0.996674	0.990049	0.971021
FALSE	High	Master Protein	TGGT1_201680-t26_1-p1	transcript=TGGT1_201680-t26_1 | gene=TGGT1_201680 | organism=Toxoplasma_gondii_GT1 | gene_product=Eukaryotic translation initiation factor 3 subunit A [Source:UniProtKB/TrEMBL;Acc:S7WB14] | transcript_product=putative eukaryotic initiation factor-3 subunit 10 | location=TGGT1_chrVIIa:3754116-3762345(+) | protein_length=1031 | sequence_SO=chromosome | SO=protein_coding_gene | is_pseudo=false	MQSFQKPENALKRADELLSVGQQDAALKILHGAIGHRRFRSQGWDSVQETIMIRHVQLCVDENKLRLARDGLHQYRIISQHANIQSLGKVIAELRSRAEQKLTQAKESAAGASASPKSADAPVLPGQGLGDLDSVADSPEDLLLSTLQIEVRSAEARGIHQALRSVWDVYKMVLDLLRTTPKLERVYHETARKAFLFCKENQRPQEFKRLCDVLRSHFALILKNRHKEDYESLMRPDLHLETRMQQLVVASELELWRECYATAEDLYSLGLHDYFLKALRTGQDLFHNSREKLMRWLAIYYEKLSRVTWVAENYLFHALAWIKLLLHVKGFKKNASQEDLQAMASVAVLAVLSIPISGAEKKPGDDAVTMGEGMNYGSLEQQKKLTMLLGHSTLPSREG…	0	242.119	40	40	122	39	1031	118.8	8.73	324.88	40	0.988	0.983	0.997	1.018	1.005	1.001	1.014	1.004	1.018	1.004	-0.02	-0.02	0	0.03	0.01	0	0.02	0.01	0.03	0.01	0.0890466	0.0904727	0.740741	0.247457	0.501132	0.954262	0.502816	0.714823	0.487414	0.722783	0.996674	0.989773	0.980327
FALSE	High	Master Protein	TGGT1_228170-t26_1-p1	transcript=TGGT1_228170-t26_1 | gene=TGGT1_228170 | organism=Toxoplasma_gondii_GT1 | gene_product=Metallophos domain-containing protein [Source:UniProtKB/TrEMBL;Acc:S7UX86] | transcript_product=inner membrane complex protein IMC2A | location=TGGT1_chrX:431147-436956(-) | protein_length=1596 | sequence_SO=chromosome | SO=protein_coding_gene | is_pseudo=false	MERRTRPDVSPRWQARRIHFVWLTALAVPIFLLFPSLSLLESTSSAGCSGIQCFASFPGVAAGSTHSREGADPSPQETLMQPRRLSGIIKTLVLWDPVQRLMPSLNLDSVVFVAGKHKADRSAAFHTTMDDVMTLLLRWFNEKDKPNWLLQGFVTEAALFREHVRYQDQMIHEQTQNQSEQQPTDPQAGMDKVLNIEVYTYLAGAKRRVRDWICDGNTFMRTGEEGSHAFKQPFLTERDVGFLRGLPYNVLRVARGVYSKRLPASVKRLQEELFHRGIRTLNDLLLKTNLMDLFVLFDIMDESFTQIDVLREFSNRWKKYRAEEVVPPLLPPGKWEGERSIEELMRDDHYPSMKFPRCTMLKCVMQDTWSKNAVETITVEKKDTNSLKLLLIGNTGIGE…	0	240.4	34	47	111	47	1596	182.2	5.94	288.89	47	1.007	1.016	1.033	1.021	1.028	1.038	1.055	1	1.007	1.002	0.01	0.02	0.05	0.03	0.04	0.05	0.08	0	0.01	0	0.752324	0.132454	0.106582	0.768899	0.592388	0.603788	0.537572	0.982729	0.819356	0.852935	0.996674	0.989773	0.971021
FALSE	High	Master Protein	TGGT1_286420A-t26_1-p1	transcript=TGGT1_286420A-t26_1 | gene=TGGT1_286420A | organism=Toxoplasma_gondii_GT1 | gene_product=Elongation factor 1-alpha [Source:UniProtKB/TrEMBL;Acc:S7W358] | transcript_product=putative elongation factor 1-alpha (EF-1-ALPHA) | location=TGGT1_chrV:1692242-1694172(-) | protein_length=448 | sequence_SO=chromosome | SO=protein_coding_gene | is_pseudo=false	MGKEKTHINLVVIGHVDSGKSTTTGHLIYKLGGIDKRTIEKFEKESSEMGKGSFKYAWVLDKLKAERERGITIDIALWQFETPKYHYTVIDAPGHRDFIKNMITGTSQADVALLVVPAEAGGFEGAFSKEGQTREHALLAFTLGVKQMIVGINKMDSCNYSEDRFNEIQKEVAMYLKKVGYNPEKVPFVAISGFVGDNMVEKSTNMSWYKGKTLVEALDTMEAPKRPSDKPLRLPLQDVYKIGGIGTVPVGRVETGILKAGMVLTFAPVGLTTECKSVEMHHEVMEQAVPGDNVGFNVKNVSVKELKRGYVASDSKNDPAKGCATFLAQVIVLNHPGEIKNGYSPVIDCHTAHIACKFAEIKTKMDKRSGKTLEEAPKCIKSGDAAMVNMEPSKPMVVE…	0	240.303	65	23	233	4	448	49.5	8.78	535.22	23	0.985	1.039	1.047	0.978	0.963	1.016	1.023	0.966	1.004	0.996	-0.02	0.06	0.07	-0.03	-0.05	0.02	0.03	-0.05	0.01	-0.01	0.758585	0.623172	0.474893	0.626944	0.691923	0.617662	0.215798	0.702427	0.964294	0.946586	0.996674	0.990049	0.973444
FALSE	High	Master Protein	TGGT1_306660-t26_1-p1	transcript=TGGT1_306660-t26_1 | gene=TGGT1_306660 | organism=Toxoplasma_gondii_GT1 | gene_product=MATH domain-containing protein [Source:UniProtKB/TrEMBL;Acc:S7UIG4] | transcript_product=RNA pseudouridine synthase superfamily protein | location=TGGT1_chrIX:6025601-6045208(-) | protein_length=6535 | sequence_SO=chromosome | SO=protein_coding_gene | is_pseudo=false	MGNGVSAPPGGAGLDGPASALQGSPFVSSAVLSSASRRRSSRLRAACEAKAAGSSVDQTFCSAVDPPKVPSASSCALKSLPLPLPLLPALSDSALPPPPSSTRSEPPYLSPWLSSSPDSLSPCSSCPAHPPSRRSSRPSSAFGRGSPECSHSGTTLIPEAALHALREKNLDAISGLPPASDMAYGVLCPGAVSCAEDNGSGAFLLSSAALPKGREDAHLAAGDSSLPMGERATGGADCLVSCFPPAFSREAISAYVSRSSRAYLLEAVRQEADHRCLSDDEMGPLPSGGGGGSGSSLVADSPAISATEGTKNSGVRLSDHFFLLPAASGGAPAVNPPSTPSQNVVSLSPACLSCPSAHPTSRGATGTGEAGQIVSRLADCVEDSLLSEALKGTLQAGET…	0	237.096	13	67	86	67	6535	675.8	6.76	187.37	67	0.977	0.997	1.05	0.99	0.967	0.987	1.039	1.024	1.017	1.082	-0.03	0	0.07	-0.01	-0.05	-0.02	0.06	0.03	0.02	0.11	0.302892	0.855439	0.0377262	0.79196	0.313511	0.811756	0.451289	0.563657	0.642804	0.173196	0.996674	0.996893	0.971021
FALSE	High	Master Protein	TGGT1_254570-t26_1-p1	transcript=TGGT1_254570-t26_1 | gene=TGGT1_254570 | organism=Toxoplasma_gondii_GT1 | gene_product=hypothetical protein | transcript_product=hypothetical protein | location=TGGT1_chrIII:1812321-1825184(-) | protein_length=1997 | sequence_SO=chromosome | SO=protein_coding_gene | is_pseudo=false	MDAETPTSPPASGESTTVGSAEPPAPVGVSEHPSAGDKMEASLEAASVDSVSPHSVSSDPILSADSSSSCPDGDAAVEREALLAQNAQLRRLLQQQASELERMRAASRDPRVCAEPGDKKASKDKEEPVAAAAAEALKKEDELTALRQQLRGVQDQAIELQTRNDRLVVEQQQLVESLTREKVERLSAERHSLAAAASAASAEGRQRLQQQRLEIAENAQNQLREQLTLARQEQQQQLEEAAEAARVAAKTKAALDARLQEAQEENELLRRKAEDLENLLRQRQRESALEHEKEKQELLAAHEAVALKEELLALKTQHVEKQEKCLQVLQESNAQLQLDNQRLATLVEEKDKELSELKETLARVDGSATSSQSGLTKLAEAAASPGTELPVPPRLSREE…	0	236.64	31	55	86	55	1997	224	4.91	205.04	55	1.028	1.044	1.028	0.966	0.993	1.008	0.993	1.021	0.979	1.003	0.04	0.06	0.04	-0.05	-0.01	0.01	-0.01	0.03	-0.03	0	0.105039	0.329666	0.652938	0.257298	0.616482	0.553931	0.853482	0.572092	0.25015	0.782227	0.996674	0.989773	0.975418
FALSE	High	Master Protein	TGGT1_221320-t26_1-p1	transcript=TGGT1_221320-t26_1 | gene=TGGT1_221320 | organism=Toxoplasma_gondii_GT1 | gene_product=Acetyl-CoA carboxylase ACC1 [Source:UniProtKB/TrEMBL;Acc:S7VU47] | transcript_product=acetyl-CoA carboxylase ACC1 | location=TGGT1_chrII:218988-235059(-) | protein_length=2614 | sequence_SO=chromosome | SO=protein_coding_gene | is_pseudo=false	MPTRTHARVRSVCTMGVVSRAAAASWPLASRARDSGALWGGLGNDGEAGNRFPVTFSLSGETNGKPQTHHCSRPIDHRETRRGNGGVSGFFVFLFLFFFSPLSATAGPTQSGNLLPYTGGPWENSRRPEDGHRAFSLASSQPSFFGPPAASSGPSHVGNPHGSDLVPPSSLSPSSSVVSSFAVSSPVSAHGLRKRRPMLPFSRSRRSMTFLSGPPISASPSSVSSSARFPSRSCSSLSLHREARDSPRCHGVSCSVFESPELRHATFLSHPVPHSPLSSPATPASFSSRSAPGNQSAIQASTTESRVGEREGEATPTRVGDGEGDPLADYVRKHGGKRVIRRVLIANNGMAATKSIFSMRQWAYMELGDDKLLEFVVMATPEDMRANPEFIRRADKIVE…	0	233.33	25	58	99	58	2614	287.6	7.53	224.57	58	0.995	0.976	1.001	1	0.995	0.976	1.001	0.976	0.991	0.986	-0.01	-0.04	0	0	-0.01	-0.04	0	-0.03	-0.01	-0.02	0.88115	0.480728	0.961957	0.996389	0.211697	0.092959	0.948578	0.399488	0.362143	0.471513	0.996674	0.990049	0.992295
FALSE	High	Master Protein	TGGT1_275650-t26_1-p1	transcript=TGGT1_275650-t26_1 | gene=TGGT1_275650 | organism=Toxoplasma_gondii_GT1 | gene_product=hypothetical protein | transcript_product=hypothetical protein | location=TGGT1_chrIII:288290-290923(+) | protein_length=877 | sequence_SO=chromosome | SO=protein_coding_gene | is_pseudo=false	MNPARDSICEPTSVKMVSEAPGVPSSPSTEVRTAALKAWRAWRKDNKGPLEEVLQNPAGYSLYKAMKSSAGGPVPNTFQQWLQQNEHAKRWLAWRQGCPGQLREVLADPEGWRLFSTMKREKGQPVPDTYEEWRDLPEHKIVVSRRTWSAWRRAHPGPLAATLADPEGWALYRQIKVSDGKDVPERYEDWVSHPTVRKQAAMEAWTQWRHEHPGQLAKVLADPQGWTLYKAMVECGDKRIEATYEEWMAKRDASPTSWAVWRKSHRGPLNEVLKDPAGWAAFTAYNTKKGVSLPATYEEWVQLPEQQKGAASFKWSSWRKTHKGPLAEVLADPEGWALYVNMLEKGSHARIHSSYAEWLEAYRAAKSPGSSAAQWRQWRKAHEGPLEQVLADPEGWKLY…	0	228.332	46	35	106	35	877	101.1	9.19	312.6	35	1.008	0.987	0.989	1.023	1.031	1.01	1.011	1.013	1.023	1.032	0.01	-0.02	-0.02	0.03	0.04	0.01	0.02	0.02	0.03	0.05	0.465272	0.735244	0.257082	0.575446	0.549429	0.0579264	0.717104	0.45244	0.480589	0.321066	0.996674	0.995152	0.971021
FALSE	High	Master Protein	TGGT1_219850-t26_1-p1	transcript=TGGT1_219850-t26_1 | gene=TGGT1_219850 | organism=Toxoplasma_gondii_GT1 | gene_product=AA_TRNA_LIGASE_II domain-containing protein [Source:UniProtKB/TrEMBL;Acc:S7V2A6] | transcript_product=prolyl-tRNA synthetase (ProRS) | location=TGGT1_chrXII:529404-538395(-) | protein_length=830 | sequence_SO=chromosome | SO=protein_coding_gene | is_pseudo=false	MRPGVFSRGFCRPGTLFSPFSLLFSSLWWTLWTRPSTTLAFRASVPRFSRGTACRATDAFLVPELRVESSLLRGCASLRPFASTSLGRQGLGNFPGIQSQASKTLRFPGSSFCQVSACKMATNSDVSVLSAEEQRREAKALQKLEELGIGYQLHRHAPVATVDAMVKASFRDKGVIAANLFLKEKQRFFLLTVTHDLPIPLKGIAKLLSAPRMRLADEELLGPMLDVSKGSVTPLAAMCDEKKEVTLVFDSAMKKNPDLVVLVHPLHNKATVALKASDLVKFVEACGHSVMWLDVDEAVKLAAAPAGGANKPNAPAGKAPGAKEAVTDSSMLGVTAKKDENFSEWYTQAIVRSEMIEYYDISGCYIMRPWAFHIWEKVQRFFDDEIKKMGVENSYFPMF…	0	227.314	42	30	95	30	830	93.4	8.07	298.32	30	0.997	0.99	1.012	0.994	0.991	0.984	1.006	1.028	0.998	1.019	0	-0.01	0.02	-0.01	-0.01	-0.02	0.01	0.04	0	0.03	0.372455	0.476477	0.250586	0.491884	0.274409	0.112203	0.13495	0.0897104	0.838614	0.0135012	0.996674	0.990049	0.971021
FALSE	High	Master Protein	TGGT1_216670-t26_1-p1	transcript=TGGT1_216670-t26_1 | gene=TGGT1_216670 | organism=Toxoplasma_gondii_GT1 | gene_product=FUSE-binding protein 2 / KH-type splicing regulatory protein [Source:UniProtKB/TrEMBL;Acc:S7VUJ0] | transcript_product=FUSE-binding protein 2 / KH-type splicing regulatory protein | location=TGGT1_chrXI:5891708-5895741(-) | protein_length=941 | sequence_SO=chromosome | SO=protein_coding_gene | is_pse…	MARKKRGSAATPEEGETPPAGQVAQKTPETGSAPQATEKPKEVSTQDLLAATALVARPQVDTSNLSASQKKNLKKKIRKQEQRQQEAAVLAVVRPEAKATGMASHYAEQEAPLRRRLEALKRAAGQQTRGSGAPSAKKLSQDVEAVLREIDGTLEREVAALQKPLSKRVTVQQLQQQIRDVEAQVQKQQRELQRQAHQGEGESAEIRACLDESLRYVVHLREQLILTQQQNELRVFRDRLGALKAEGEGLLKALHASGSPGGERGRAGHAGNGSASPSGAKEAQWRRRLGDLSRGGPERRRGPKPAEEEETAQPQPLVVQHVSLGPDAMGLLFPGGQNPVLVRKLERACGLVLDKQSGGAGRAGTVAVVGLQAANVDRGVALLNSLDEGMQPEKREKHR…	0	227.286	48	39	124	39	941	100	8.95	292.89	39	0.993	0.993	0.98	1.026	1.019	1.019	1.006	0.997	0.986	0.987	-0.01	-0.01	-0.03	0.04	0.03	0.03	0.01	0	-0.02	-0.02	0.794958	0.658923	0.34096	0.593128	0.387406	0.559932	0.844373	0.474162	0.175615	0.238977	0.996674	0.990049	0.971021
FALSE	High	Master Protein	TGGT1_298610-t26_1-p1	transcript=TGGT1_298610-t26_1 | gene=TGGT1_298610 | organism=Toxoplasma_gondii_GT1 | gene_product=GYF domain-containing protein [Source:UniProtKB/TrEMBL;Acc:S7ULJ6] | transcript_product=GYF domain-containing protein | location=TGGT1_chrXI:6511021-6521705(+) | protein_length=2331 | sequence_SO=chromosome | SO=protein_coding_gene | is_pseudo=false	MYQPRPFTGVNRARAAAAASANQSGSSGSSTRGVRTPTASYAQQQTPAVVSSGESSTAASNLCLGSGGVLADTADFPFLVNPSRSPAAHSSAPADVASPSSQKGRRGAESGTAAEPSTPSNPWQKAGAVAQQPPRQTAPTTSSIPVSSLTGFFPGASSRAGVADSHAALQRNLQRMQLPPAPSSRNAGSTSSGRAGGAWGTASDGSGPSGEVAAGGSLEGPSSGGASGRSRGGTGGASPSPTGSRPSLGSSSSRTFAGDLFGAALRSGSRGGESKGTSEGAAASGGSLVEGPGVRAGNSGSGSAAGVEREEGVGGPSAGKENPCYGKLPLLTLWRSARSTNDAAAARVLATVAPGQVTEEQQLLFRLVVREAPAAGAGPAGAPGLGAPHHGAGQSGSGG…	0	226.208	24	46	81	46	2331	237.8	9.17	233.74	46	1.03	0.991	1.018	0.99	1.02	0.982	1.008	1.018	1.008	1.02	0.04	-0.01	0.03	-0.01	0.03	-0.03	0.01	0.03	0.01	0.03	0.237456	0.14633	0.0837533	0.682528	0.196671	0.519991	0.687543	0.383841	0.821511	0.358968	0.996674	0.989773	0.971021
FALSE	High	Master Protein	TGGT1_205470-t26_1-p1	transcript=TGGT1_205470-t26_1 | gene=TGGT1_205470 | organism=Toxoplasma_gondii_GT1 | gene_product=Tr-type G domain-containing protein [Source:UniProtKB/TrEMBL;Acc:A0A125YJ59] | transcript_product=putative translation elongation factor 2 family protein | location=TGGT1_chrVIIa:1297616-1301283(+) | protein_length=832 | sequence_SO=chromosome | SO=protein_coding_gene | is_pseudo=false	MVNFSVEQMREIMGNPKNIRNMSVIAHVDHGKSTLTDSLVSKAGIISAKAAGDARFTDTRADEQERCITIKSTGISMYFEHDMEDGKGAQPYLINLIDSPGHVDFSSEVTAALRVTDGALVVVDTIEGVCVQTETVLRQALAERIRPVLHVNKVDRALLELQMDGEEIYQTFSRTIENVNVIISTYNDELMGDVQVYPEKGTVSFGSGLHGWAFTVERFSKIYAKKFDVPKEKMMERLWGNNFYNAKEKKWTKTQSENTRRAFCQFIMDPICTLFTSIMNDEKEKYTKMLGSLGIELKGDDRDLTGKALLKRVMQLWLPAGDTLLEMVVRHLPSPFAAQKYRVENLYEGPMDDEAAQGIRNCDPNAPLMMYVSKMVPTSDKGRFYAFGRVFSGTVATGQ…	0	222.311	36	30	194	28	832	93	6.33	534.89	30	0.98	0.986	0.989	0.998	0.979	0.984	0.988	1.017	1.009	0.995	-0.03	-0.02	-0.02	0	-0.03	-0.02	-0.02	0.02	0.01	-0.01	0.277663	0.553632	0.142617	0.918936	0.136952	0.120728	0.473288	0.098448	0.665652	0.44898	0.996674	0.990049	0.971021
FALSE	High	Master Protein	TGGT1_254940-t26_1-p1	transcript=TGGT1_254940-t26_1 | gene=TGGT1_254940 | organism=Toxoplasma_gondii_GT1 | gene_product=MI domain-containing protein [Source:UniProtKB/TrEMBL;Acc:S7W271] | transcript_product=MIF4G domain-containing protein | location=TGGT1_chrIII:2027943-2043635(+) | protein_length=3756 | sequence_SO=chromosome | SO=protein_coding_gene | is_pseudo=false	MFSHDGSNVSRPREELRHSGREEDRRRPSLSYAPVHTAPVRGRGGPRGPTRPHVGGPSQALAGHSENPGCPPLLSAAFAAPQHGNVRPSISRGGQAPLERRPSGEETGPGAPHSVAHTNGPFPRASGPPGPAGLAPSGATNGSDRESAQSEEVRTGAPLGASVPAGPFGFHPGPVPSSLCGPPPPSPPGSVGCLRPHLGGDGARGPNGPRGERDGPPLHTGRPSPAPHGGPFVPSGDHERDRVLGVPAGGMGPSNGPSRSVGGAGPGRAFEEHLGGRGGRGGAPLGVTSPEGLGREDAHFPGDRDARPENGPVPSHPRKLRGPPTNSVGGRGHANVDFPGGAPGASQHSGQGLQGNVDQPRGPPHPGDMQLMGPPMHPPFHHGREGPAGLGNDMGPGMR…	0	220.951	18	57	88	57	3756	384.6	6.87	200.27	57	0.993	0.984	0.965	1.038	1.031	1.022	1.001	1.01	1.017	1.031	-0.01	-0.02	-0.05	0.05	0.04	0.03	0	0.01	0.02	0.04	0.829272	0.0874061	0.134088	0.244802	0.188623	0.43229	0.969961	0.464231	0.204784	0.181191	0.996674	0.989773	0.971021
FALSE	High	Master Protein	TGGT1_292020-t26_1-p1	transcript=TGGT1_292020-t26_1 | gene=TGGT1_292020 | organism=Toxoplasma_gondii_GT1 | gene_product=GCC2 and GCC3 domain-containing protein [Source:UniProtKB/TrEMBL;Acc:S7UNY5] | transcript_product=GCC2 and GCC3 domain-containing protein | location=TGGT1_chrIX:4285927-4313392(+) | protein_length=7440 | sequence_SO=chromosome | SO=protein_coding_gene | is_pseudo=false	MSSLASDANNSSSAADIVHDFCTKICDPVSVSSFAEVGGSPRSSDASSRPLGKALRKSRLVGFFLVPVFVVFFVLSSDATSSTRGVGVLSARADREEKSSVSSSSRASSSPGASALLVQTTYAENPYRDTKAAGYTGRSSRRSARARRRRAADGGEGKGFLGDMLNKSMLETRSRSTAADPYQQFTSCGSGMFVSTEVGEDGGVEKTAKVDESMNCWNVCAFVEDLVYDQCSSTPSPTECITRALKSHSLVPDGYKGNCRYSSPQDVSPTFWDAEPDSEFCLDKGMNAWLKSDSWDDFVSKKPPGCIYPKQDPSIPASTPTAYVNDATSGLGEALASLVPVEYYVVVRDAEEAMNNPIEYGAYVASSIVPREYWDKVSSDAKDGWHVARAFSVPDKPAE…	0	218.875	10	61	84	61	7440	799.5	4.87	173.07	61	1.015	1.016	1.033	0.962	0.977	0.977	0.994	0.974	0.997	0.997	0.02	0.02	0.05	-0.06	-0.03	-0.03	-0.01	-0.04	0	0	0.170249	0.562806	0.0856005	0.162482	0.157271	0.572379	0.500098	0.0681417	0.901224	0.361463	0.996674	0.990049	0.971021
FALSE	High	Master Protein	TGGT1_291180-t26_1-p1	transcript=TGGT1_291180-t26_1 | gene=TGGT1_291180 | organism=Toxoplasma_gondii_GT1 | gene_product=hypothetical protein | transcript_product=hypothetical protein | location=TGGT1_chrIX:4004987-4034538(-) | protein_length=5394 | sequence_SO=chromosome | SO=protein_coding_gene | is_pseudo=false	MLEALVERLLSRYLALYVTGISRDKLSVAVWSGDVELEDLQLKPEISDLFGLPFRVVSGRLKRIRLSIPWARLGSAPVCLEVEGVHVLLEPKPIPEQTDEELIAQLRDAKKQQIDVVEQQLLDARSQLLKATDAAASAPAADRGVFFKFANKIVNSIQIDVRDIHIAFADPSRGFKIGVLLADCSVHNTDALWRRSVSEGSSAGGAPMVLYKACELNGLAVYCSLACGAGGETAVAGSELNARSHEVSFRSLPRSKSSSQSSSASSLPETSPGGVHATPADRDDGDLPTARDRLHTETKEVRDSRAPSPCDTGGLDTGGGRSAEAAGAFAEEREETLQAKTSGSSEFAEAFFLAPIPEQNYVLKPLHMRLLISHSTTLRELCARLEVKKESQGIEIGRT…	0	218.647	16	69	90	69	5394	578.5	6.39	168.81	69	1.016	0.996	0.978	0.998	1.013	0.994	0.976	0.984	1.011	0.97	0.02	-0.01	-0.03	0	0.02	-0.01	-0.04	-0.02	0.02	-0.04	0.726945	0.923436	0.496449	0.958008	0.169956	0.486597	0.35631	0.498783	0.558209	0.106874	0.996674	0.998909	0.973444
FALSE	High	Master Protein	TGGT1_313270-t26_1-p1	transcript=TGGT1_313270-t26_1 | gene=TGGT1_313270 | organism=Toxoplasma_gondii_GT1 | gene_product=hypothetical protein | transcript_product=hypothetical protein | location=TGGT1_chrXI:3183953-3196338(+) | protein_length=2799 | sequence_SO=chromosome | SO=protein_coding_gene | is_pseudo=false	MSGTGGAGSGPLGSAGGARGGSKSSAPRPVKIAAVSLVDLKEQASKTPTPSRGWGVIPQPATSVESSGMSSSLFPPVSALKQQFHGSASSSSQANAVGGRTSSSFARAVRGLRNLKEETGDEISRGDGEKEAQPQERDGECEKEERGQNEGDVKGQANAGAELGDRTKPTAAETQQPGGSLPNDTNVTFEKGGEEREKDSSQKHEGEKTKEEPRQDASGTVPARSREDESIAATGAISLSKLITASRKVGISVSVRGRAVNTAAGTVKSSGSAWKSGVSAAASSGASSSAPFSSRAASSSGPASSLYAARAGGAAPATGSVDDEAFPDLMKSAEQVKLEAQKEKDRQKRTKEALRRVEKDENGSVSQPQTRRLGLQELFDLTSEGGALSSLGDKTGLGD…	0	217.987	25	49	82	49	2799	281	9.51	166.69	49	1.006	1.021	0.995	1.014	1.021	1.036	1.01	1.017	0.988	0.994	0.01	0.03	-0.01	0.02	0.03	0.05	0.01	0.02	-0.02	-0.01	0.81591	0.535785	0.627988	0.119905	0.452356	0.336594	0.259499	0.0315528	0.372636	0.450219	0.996674	0.990049	0.975418
FALSE	High	Master Protein	TGGT1_228120-t26_1-p1	transcript=TGGT1_228120-t26_1 | gene=TGGT1_228120 | organism=Toxoplasma_gondii_GT1 | gene_product=hypothetical protein | transcript_product=hypothetical protein | location=TGGT1_chrX:469350-486422(+) | protein_length=3946 | sequence_SO=chromosome | SO=protein_coding_gene | is_pseudo=false	MEEDGGAPSSPCGVPATGGVEKAVAYQSEDMLGGEANIGCNTAHGVPDVQISPPSAGISPSPPSSGTPPLLGQAAGLDVVEANRSGDEADAAFSATRRPDSPASFMEGEDPDTPRSPTQQTTSPQPPLSPQPSLSPPLVSEVVDALYPESPRPGSGALTRGMCLSAGGPVSSGPPLSSTPPSPASSRSSSSPGGARVSSPVSAAPLVPTFPVPFAPERRAEPGRCRIREGQASSSRVDRYGDSVPAEKAGRGSPSFLERNAFDRETNSGPTGIGGHSPFFSPLQGAGVSSSAGGSGGSNRPQHPLVHASTPSWVKYGEEHYPEEAVPIEYQWVEDDGTCCCYVTDFLLYNKKGERLLQVETLDQDELADVALYGKLVHVALVHPPEALEARKHPTACQV…	0	217.669	19	57	80	57	3946	418	5.05	175.38	57	0.988	0.984	1.014	1.038	1.026	1.021	1.052	1.009	0.993	1.04	-0.02	-0.02	0.02	0.05	0.04	0.03	0.07	0.01	-0.01	0.06	0.847696	0.0981152	0.108347	0.160504	0.733178	0.330884	0.14679	0.801231	0.0593306	0.239356	0.996674	0.989773	0.971021
FALSE	High	Master Protein	TGGT1_278870-t26_1-p1	transcript=TGGT1_278870-t26_1 | gene=TGGT1_278870 | organism=Toxoplasma_gondii_GT1 | gene_product=Myosin F [Source:UniProtKB/TrEMBL;Acc:S7UZI5] | transcript_product=myosin F | location=TGGT1_chrXII:5709485-5725053(+) | protein_length=1953 | sequence_SO=chromosome | SO=protein_coding_gene | is_pseudo=false	MTASSADGASAPGGGDPGEEEVRCAVGTKIYVPDAADVWRTAEVVKIQEDGSLTARVDADNELVQLKKNDIWYLCNTDVWNTTGLSAPTDLTMLTHLHEAAVLDSLNLRFDIDEIYTFTGPILIAVNPFKQITGLYDMKQLVRYIASSELPMPGVPSSSSGSSSNAPVALPISRQPHVFASSSAAYQGMCNEKQSQTILISGESGAGKTESTKFVMKFLACAGSEDLERRSQVEAQVLESNPLLEAFGNARTLRNDNSSRFGKFIELQFQTSKAKRMSGNRGRLCGARIQTYLLEKVRVCDQQEGERNYHIFYQLCAAAEAAAQTGGIYYFPSPKFRKAADAKAQEMDMSLFEPRDKFKYLTKSSCHQLQGVDDCEEFESTLFAMQTVGISPEEQMSIL…	0	216.575	28	47	87	45	1953	216.3	8.1	215.68	47	0.988	1.007	0.996	1.007	0.995	1.014	1.003	1.018	1.018	1	-0.02	0.01	-0.01	0.01	-0.01	0.02	0	0.03	0.03	0	0.525403	0.576189	0.426942	0.831073	0.913638	0.547608	0.917651	0.626604	0.736487	0.983647	0.996674	0.990049	0.973444
FALSE	High	Master Protein	TGGT1_286580-t26_1-p1	transcript=TGGT1_286580-t26_1 | gene=TGGT1_286580 | organism=Toxoplasma_gondii_GT1 | gene_product=Hydrolase_4 domain-containing protein [Source:UniProtKB/TrEMBL;Acc:S7UP07] | transcript_product=hypothetical protein | location=TGGT1_chrV:1631039-1633906(-) | protein_length=955 | sequence_SO=chromosome | SO=protein_coding_gene | is_pseudo=false	MAPPRDVTPVSPRSPAETDTAVCSSVICGSETKLEEWPYPRLPPFSIDYIELRYPKVAIFHNVRDQPIVRYTWTTTTGPARGAVVLLHDQGTHTMFEWLKHLPPLSIEERQQMEEDTEATEVEKKEFMRLRKASHYEDSWVQKFNDAGLDVHAIDLQGHGLSKVVEGKNYELPSSFDEFAEDACWLLEEVCRNSTLPIFIMGQGLGATIAARAVEMLARQGKLGKPHVPPAKPADAVGASEQSTTTGTSQSSEAGREVPGMHYATDPQYCLHRGKGKKEVPVEHITVQARPIPIAGLVLLSPLLTLKEITPEEMRKGKGKHTEGIMTRIARCFGSTRDSSHPLGGLMGFRMHQQNPLMPEYNVWYKNDTMTIKGLTPQTMYTQIAHGIDSAMDDARWLL…	0	215.528	42	36	101	36	955	107.2	5.63	277.97	36	1.01	0.994	0.992	0.983	0.993	0.977	0.974	1.008	0.945	0.952	0.01	-0.01	-0.01	-0.03	-0.01	-0.03	-0.04	0.01	-0.08	-0.07	0.588496	0.510734	0.6246	0.194769	0.537779	0.0217957	0.387063	0.490726	0.116082	0.200687	0.996674	0.990049	0.975418
FALSE	High	Master Protein	TGGT1_269180-t26_1-p1	transcript=TGGT1_269180-t26_1 | gene=TGGT1_269180 | organism=Toxoplasma_gondii_GT1 | gene_product=MIF4G domain-containing protein [Source:UniProtKB/TrEMBL;Acc:S7WKZ1] | transcript_product=MIF4G domain-containing protein | location=TGGT1_chrVIII:6008955-6021323(-) | protein_length=2668 | sequence_SO=chromosome | SO=protein_coding_gene | is_pseudo=false	MSAVADGASSGTIHQSLQNSRVELFAEQSSSVGAGSGNHPLFECSDFLSSCDSALPAAPQYPPFSVGGTRESPFVSGGPPTFGHPLSVSASFAAPCSQRGTPAGGSFLSPAQSWLKTYFPSENAVNSRSSLEPVILPGLPSASSPSGCVPAFPTFFPVPVGPTPLSGVAAPCRSLAKPQPASRLQLGEEPEGREAARTGRGGLFPSLGAPVTMPPPPASVATPTAAESANGGAAAPVAPSPSGNAGPMRSQLRADAVEFRPAATTAAVVPGSFKGASGGVQAAPPAAPAGGVQHSGAAGATPASPSSMGLSGVNNGATPASPSSATTYNSTHQFNRNAQEFVPGRPFVVYPSSPSPPGAPPPPMAGALARSAPAQAAGLGPATAPGATQNVGVPPVPGV…	0	215.071	24	51	79	51	2668	272.9	9.25	198.91	51	0.993	1.038	1.019	0.995	0.988	1.033	1.014	1.001	1.016	1.005	-0.01	0.05	0.03	-0.01	-0.02	0.05	0.02	0	0.02	0.01	0.531891	0.271218	0.0919771	0.292362	0.278132	0.267897	0.224689	0.610754	0.416235	0.798736	0.996674	0.989773	0.971021
FALSE	High	Master Protein	TGGT1_223390-t26_1-p1	transcript=TGGT1_223390-t26_1 | gene=TGGT1_223390 | organism=Toxoplasma_gondii_GT1 | gene_product=Putative activating signal cointegrator 1 complex subunit 3 family 1 ASCC3L1 [Source:UniProtKB/TrEMBL;Acc:S7W4M7] | transcript_product=putative activating signal cointegrator 1 complex subunit 3 family 1 ASCC3L1 | location=TGGT1_chrX:3771178-3788152(+) | protein_length=2207 | sequence_SO=chromosome |…	MAEEFERFKRFEYRQNSNLVLQRDTSTGVAPAVHLGEPTGEPESLAGRKLYPMGDKVERGLKKEDRPVKNDSKRAKLKRNKLDLKRGATVLDADVTEIFFYKPTTQQTRLVYEQLLVTLQQQLGDQPDEVLKGAADEVLAALKADGCRESEKKKNVEQVLGPVNSDVFTRLHQLAKNITDYSLGGEEEDGAQAGGLDGSTGVAVVFDEEEEEDANELMEAEVLPGEEEEEDEEEEEDADRTYLAAKAVDEEELADRDAYELDISKIDPHWLQRELNGVFKDPNKAVATEKEILSILPTPDIQKCENQLVVILKYENFELAKRILKNRWKIFFAVRLGQAQSPEEKNAIFEEMRSSPEGQEVLELLDALSSRRNKEKEIAINVRKEAASLAAKAQARAAS…	0	214.327	25	50	90	50	2207	248.3	6.32	217.4	50	1.014	1.016	1.005	1.015	1.03	1.031	1.02	1.023	1.035	1.044	0.02	0.02	0.01	0.02	0.04	0.04	0.03	0.03	0.05	0.06	0.288021	0.301717	0.793562	0.76194	0.633846	0.4978	0.555822	0.627762	0.475233	0.328541	0.996674	0.989773	0.984106
FALSE	High	Master Protein	TGGT1_318440-t26_1-p1	transcript=TGGT1_318440-t26_1 | gene=TGGT1_318440 | organism=Toxoplasma_gondii_GT1 | gene_product=Helicase associated domain (Ha2) protein [Source:UniProtKB/TrEMBL;Acc:S7UJM8] | transcript_product=helicase associated domain (ha2) protein | location=TGGT1_chrIV:1264045-1277404(-) | protein_length=2234 | sequence_SO=chromosome | SO=protein_coding_gene | is_pseudo=false	MAPPHARRGRGDGPSRGRGDRRRDRDGFSADAPLCAPADRAEANVSADLTSPGVPSSAPVGRRSSAAPQGLSGHASRGRDSPLLPRCSASAAGTRKGSAPDDGDNDREDALPVSSGVPSGVSTVPTGGGRSERAFPMARAFATGLTNRTPAGRGRGGGRAPGGSRRRLPETTQVPGQAVRHGSEAQSSQLSTPSSLLSHVSVEPSLCGGQMPREAQTGPPAATPHAPVRPAGPLGAGRSSSEGLASSESSAPLTASASSYFSVPPASETPAKGAMAPVEELPIMRYKEAILDHIREHSVTCIQGETGCGKSTRVPRFLLEEDLRQSRERREGPETPEGVMPRRLNAIVTQPRRLACIALARRVAQELEEPLGRSVGYRISGDAVTSKETKVCFVTTGYF…	0	213.63	28	48	93	48	2234	236.8	8.97	203.76	48	0.991	1.014	1.006	1.007	0.997	1.021	1.013	1.014	1.003	1.022	-0.01	0.02	0.01	0.01	0	0.03	0.02	0.02	0	0.03	0.867252	0.0478536	0.874697	0.928339	0.900353	0.782543	0.7356	0.701633	0.932754	0.638834	0.996674	0.989773	0.9909
FALSE	High	Master Protein	TGGT1_294350-t26_1-p1	transcript=TGGT1_294350-t26_1 | gene=TGGT1_294350 | organism=Toxoplasma_gondii_GT1 | gene_product=DEAD/DEAH box helicase domain-containing protein [Source:UniProtKB/TrEMBL;Acc:A0A125YTI5] | transcript_product=DEAD/DEAH box helicase domain-containing protein | location=TGGT1_chrIa:802644-825713(-) | protein_length=2434 | sequence_SO=chromosome | SO=protein_coding_gene | is_pseudo=false	MENSQQLLELESLAVDRGETGRRPPGKLRSATRSPTAVARGCPLEDGLSGLRNLSGPRGPSMALWLLVGDMSPGPSCRPLLRLVLCTASSLAFPGSLPYFSSLRDLTPRRSLASPVSSPAAAASLSSPQCLAFVALRGPRVSAAPAACVFARTSPQRTMRDSDGPSRFGRRVSDQLMSLDSSASLAATPKPTKEQLLADEHEGRVASKVDVGAVTDAAGEKDKEDFREGGAEGKGAGGGRGDGAVGDEEFYAEGVAAVSMVAEDELEAPLRMLSWWAALLPQTRGEVMTELGGSYLFFVHGDSLILHLLRKNYVDFDVEQGIQPLLYMHLIEKQLLSLISAGAILHLVFFRVFEDVVVGGDSRDAVPSMFLLIREQLLLYLSVMKVDFTVVDDWFSDDW…	0	212.56	22	53	87	53	2434	273.6	6	204.06	53	1.005	1.007	1.005	1.006	1.011	1.014	1.011	1.02	1.018	1.003	0.01	0.01	0.01	0.01	0.02	0.02	0.02	0.03	0.03	0	0.630857	0.685556	0.785419	0.810128	0.754965	0.756528	0.367556	0.49691	0.534093	0.592611	0.996674	0.99327	0.984106
FALSE	High	Master Protein	TGGT1_294550-t26_1-p1	transcript=TGGT1_294550-t26_1 | gene=TGGT1_294550 | organism=Toxoplasma_gondii_GT1 | gene_product=Dynein heavy chain [Source:UniProtKB/TrEMBL;Acc:S7VWW7] | transcript_product=dynein heavy chain | location=TGGT1_chrIa:919161-949027(+) | protein_length=4974 | sequence_SO=chromosome | SO=protein_coding_gene | is_pseudo=false	MERQKIALSNFLLEICPALLNCSRQSLQSLLAKEGDRTLQTFLIEQQQVLVVGREPVAKKKNGTTSGAPGTDAANTERPEELPADENDEEEQFRLFVELGFAAHALTRAYSVAFLKRPGFSLEEQTSPEVAEDGEAASSPADAPARRKTIGQQLAVLCCGFGDDTESSLDVTQLYMQRGLAPMLNVALTQKETEGPGPGGAQAGNGSASGPAEEGAAEAAQNKAATSSLHQTVNKKMAELLLAVQQAQQNVDIPLIQLPVDPVIEETVKAAQAAGRKATVEDLGDYLHNTGYLIALQNHVNRWIKDIQKVCRMQRDASTGSAAEEVNFWEGMERAILRVEEQLKTPEAELTLQVLKQTRKVFATMTFEQDAGLKQASDMVASVNILIRDFPVNDLLGAT…	0	210.208	15	69	90	69	4974	558.3	5.73	181.52	69	1.016	1.012	1.019	0.99	1.006	1.003	1.009	1.004	1.004	0.983	0.02	0.02	0.03	-0.01	0.01	0	0.01	0.01	0.01	-0.03	0.217661	0.0163327	0.630573	0.488596	0.774911	0.830343	0.719206	0.50136	0.870122	0.0829521	0.996674	0.989773	0.975418
FALSE	High	Master Protein	TGGT1_292080-t26_1-p1	transcript=TGGT1_292080-t26_1 | gene=TGGT1_292080 | organism=Toxoplasma_gondii_GT1 | gene_product=Leucyl-tRNA synthetase [Source:UniProtKB/TrEMBL;Acc:S7UPR1] | transcript_product=leucyl-tRNA synthetase | location=TGGT1_chrIX:4343158-4354677(+) | protein_length=1261 | sequence_SO=chromosome | SO=protein_coding_gene | is_pseudo=false	MAACKSAGEAVRDRFHLPSIPSPSGERLRRALLALSQPLSQFVSSAASPSLPSPTPKRFSSLASLRAPLPLPAVLSRSPPSASSSAAPLPVLFRGLSSKMAAAPAAPQSRGRRDKLLSIEEAIQARWARENPYEVDAPLDAANAEKKKYFCSFPYPYMNGKLHLGHGFTLCRAEFQARFQRMQGKNILWPLGLHCTGMPILACADKLKREIALRKAEQDCGENGEKREHVESAENNSAEQQNGEEDAKKKKSKVAAKTGNAKTQWEIMLGMGIPEAEIAAFADAQHWLRYFPPLAKRDVTRMGFGIDWRRSFVTTDVNPFYDAFIRWQFNTLMKRGKLKFGMRATILSRREKQACADHDRASGEGVGPQEYTVVKLFLQGEKMREAPVPQHQPLVQLLE…	0	208.85	32	36	93	36	1261	141.2	6.96	254.36	36	1.004	1.006	1.02	0.974	0.977	0.98	0.993	0.999	0.99	1.001	0.01	0.01	0.03	-0.04	-0.03	-0.03	-0.01	0	-0.01	0	0.853089	0.788791	0.590069	0.527193	0.325684	0.315223	0.224818	0.983268	0.664988	0.971765	0.996674	0.995152	0.975418
FALSE	High	Master Protein	TGGT1_235470-t26_1-p1	transcript=TGGT1_235470-t26_1 | gene=TGGT1_235470 | organism=Toxoplasma_gondii_GT1 | gene_product=Myosin motor domain-containing protein [Source:UniProtKB/TrEMBL;Acc:S7W634] | transcript_product=myosin A | location=TGGT1_chrX:4773284-4778894(+) | protein_length=831 | sequence_SO=chromosome | SO=protein_coding_gene | is_pseudo=false	MASKTTSEELKTATALKKRSSDVHAVDHSGNVYKGFQIWTDLAPSVKEEPDLMFAKCIVQAGTDKGNLTCVQIDPPGFDEPFEVPQANAWNVNSLIDPMTYGDIGMLPHTNIPCVLDFLKVRFMKNQIYTTADPLVVAINPFRDLGNTTLDWIVRYRDTFDLSKLAPHVFYTARRALDNLHAVNKSQTIIVSGESGAGKTEATKQIMRYFAAAKTGSMDLRIQNAIMAANPVLEAFGNAKTIRNNNSSRFGRFMQLDVGREGGIKFGSVVAFLLEKSRVLTQDEQERSYHIFYQMCKGADAAMKERFHILPLSEYKYINPLCLDAPGIDDVAEFHEVCESFRSMNLTEDEVASVWSIVSGVLLLGNVEVTATKDGGIDDAAAIEGKNLEVFKKACGLLF…	0	207.869	47	38	143	38	831	93.3	8.16	371.92	38	1.008	1.022	1.008	1.007	1.015	1.029	1.016	1.029	1.035	1.028	0.01	0.03	0.01	0.01	0.02	0.04	0.02	0.04	0.05	0.04	0.690625	0.363393	0.729664	0.795355	0.296662	0.176543	0.149608	0.243026	0.0992632	0.000771713	0.996674	0.990049	0.980327
FALSE	High	Master Protein	TGGT1_247550-t26_1-p1	transcript=TGGT1_247550-t26_1 | gene=TGGT1_247550 | organism=Toxoplasma_gondii_GT1 | gene_product=Heat shock protein HSP60 [Source:UniProtKB/TrEMBL;Acc:A0A125YNH1] | transcript_product=heat shock protein HSP60 | location=TGGT1_chrXII:3342084-3346052(-) | protein_length=575 | sequence_SO=chromosome | SO=protein_coding_gene | is_pseudo=false	MLARASARVAKCNPGNVFQVRHASSKEIRFGCDARNQMLAGCNRLADAVGVTLGPKGRNVVIEQPYGSPKITKDGVTVAKSIELGNRMMNLGAQLVKQVASTTNDIAGDGTTTATLLARAIFREGCKAVDAGMNPMDLLRGINLAVEKVLAHLNSVTKNVTTSEEIFNVATISANGDKVIGKLIADAMEKVGRDGTITVSEGKTLTHELELVEGLKFDRGYISPYFITNSKEQKVELEKPFVLLYDKRISSVKSILPVLEFIVQNQGSLLIIAEDVDSEALATMVVNKLRLGLKICAVKAPGFGDHRKAMLHDIAVMTGGQVVTEETGGSLEDAHQMPQMLGRAKSVTVTKDTTLVIEGGGEKATIDERCDQIRVSMEQTHSDYEKEKLQERLARMTGG…	0	199.382	64	26	99	25	575	60.9	5.97	304.45	26	1.01	0.985	0.978	1.004	1.014	0.989	0.982	0.982	1.009	1.005	0.01	-0.02	-0.03	0.01	0.02	-0.02	-0.03	-0.03	0.01	0.01	0.102005	0.461203	0.460659	0.659458	0.229045	0.343915	0.612135	0.628194	0.736613	0.66443	0.996674	0.990049	0.973444
FALSE	High	Master Protein	TGGT1_294800B-t26_1-p1	transcript=TGGT1_294800B-t26_1 | gene=TGGT1_294800B | organism=Toxoplasma_gondii_GT1 | gene_product=Putative elongation factor 1-alpha (EF-1-ALPHA) [Source:UniProtKB/TrEMBL;Acc:S7UIU6] | transcript_product=putative elongation factor 1-alpha (EF-1-ALPHA) | location=TGGT1_chrIa:1133102-1134034(-) | protein_length=310 | sequence_SO=chromosome | SO=protein_coding_gene | is_pseudo=false	LAFTLGVKQMIVGINKMDSCNYSEDRFNEIQKEVAMYLKKVGYNPEKVPFVAISGFVGDNMVEKSTNMSWYKGKTLVEALDTMEAPKRPSDKPLRLPLQDVYKIGGIGTVPVGRVETGILKAGMVLTFAPVGLTTECKSVEMHHEVMEQAVPGDNVGFNVKNVSVKELKRGYVASDSKNDPAKGCATFLAQVIVLNHPGEIKNGYSPVIDCHTAHIACKFAEIKTKMDKRSGKTLEEAPKCIKSGDAAMVNMEPSKPMVVEAFTDYPPLGRFAVRDMKQTVAVGVIKSVEKKEPGAGSKVTKSAVKAAKK	0	195.91	70	19	184	2	310	33.7	9.04	439.2	19	0.965	0.962	0.957	1.028	0.992	0.988	0.984	0.999	0.94	0.986	-0.05	-0.06	-0.06	0.04	-0.01	-0.02	-0.02	0	-0.09	-0.02	0.662743	0.085997	0.257238	0.401734	0.934651	0.559787	0.742595	0.9902	0.420493	0.484139	0.996674	0.989773	0.971021
FALSE	High	Master Protein	TGGT1_251780-t26_1-p1	transcript=TGGT1_251780-t26_1 | gene=TGGT1_251780 | organism=Toxoplasma_gondii_GT1 | gene_product=Heat shock protein [Source:UniProtKB/TrEMBL;Acc:S7V012] | transcript_product=heat shock protein | location=TGGT1_chrXII:5504595-5509577(-) | protein_length=728 | sequence_SO=chromosome | SO=protein_coding_gene | is_pseudo=false	MASMAAGASLAYRASYCSGAKARSISSFTSLGRACVETQMTPAAAASLRPSRFLFSSLAQNAKSSSPFSAGKLRSGMNTTYERTGVLSSFSRYLSTSAPRMNGKARGDVVGIDLGTTNSCVAVMEGSQPKVIENSEGMRTTPSIVAFTSDGQRLVGIVAKRQAVTNPENTVFATKRLIGRRYDEDAIKKEKEILPYKIVRASNGDAWVEAQGKSYSPSQISAFILTKMKETAEAYIGRPVKQAVITVPAYFNDSQRQATKDAGKIAGLEVLRIINEPTAAALAFGMDKDDGKTIAVYDLGGGTFDISILEILGGVFEVKATNGNTSLGGEDFDQKILQHLIDEFKKAQGIDLTKDKLALQRLREAAETAKIELSSKVQTEVNLPFITADQTGPKHLQVK…	0	195.031	48	29	85	28	728	78.2	7.17	220.75	29	1.015	0.984	1.011	0.995	1.01	0.979	1.006	0.996	0.997	0.998	0.02	-0.02	0.02	-0.01	0.01	-0.03	0.01	-0.01	0	0	0.650502	0.201024	0.32573	0.43715	0.784952	0.264737	0.201931	0.386207	0.831408	0.898527	0.996674	0.989773	0.971021
FALSE	High	Master Protein	TGGT1_230940-t26_1-p1	transcript=TGGT1_230940-t26_1 | gene=TGGT1_230940 | organism=Toxoplasma_gondii_GT1 | gene_product=hypothetical protein | transcript_product=hypothetical protein | location=TGGT1_chrVIII:1112065-1119747(+) | protein_length=1523 | sequence_SO=chromosome | SO=protein_coding_gene | is_pseudo=false	MAPVMTASAASDRMPGLQRGKQRVRQNAFAGSASSSSSRHAKAQPTQALRGAEGQGLSPHQQRLQQNALLSGRHHLALGSDENSITDLSPRSQKWVEDVHPLLEFFNYSKRDVYALVQRAEYDQDRVQQAVAEIVEEKKGHEQGSWEVVLTKQQKHQLHRAAQAETLPLSGREGRTRRPDRERDNRHANADRQRGNEHPSAGRRADRQTAAGPVQRRRRDSRGEAGGFRRAGGQNATGKAATGRRRGRQGEAVPGVERDWEVEALESQWGAGPDGLVLPKTPVRSGEVEGTSSGSPVAQQTAAPPAQKETVNTPEAPQATAAPAAATASPARSWAARLVQKKETVPTPESKASLLGAVKSPRESSEARKREPSPIAAPAVKSPRAATPVRDRSPHPTSE…	0	193.281	28	36	83	36	1523	155.1	9.44	201.15	36	1.002	0.982	0.967	1.04	1.042	1.021	1.006	1.019	0.999	1.021	0	-0.03	-0.05	0.06	0.06	0.03	0.01	0.03	0	0.03	0.205561	0.401861	0.273218	0.0833333	0.0907592	0.472265	0.680219	0.232494	0.986815	0.393292	0.996674	0.990049	0.971021
FALSE	High	Master Protein	TGGT1_226830-t26_1-p1	transcript=TGGT1_226830-t26_1 | gene=TGGT1_226830 | organism=Toxoplasma_gondii_GT1 | gene_product=DnaK family protein [Source:UniProtKB/TrEMBL;Acc:S7UXF0] | transcript_product=DnaK family protein | location=TGGT1_chrX:1215623-1218481(-) | protein_length=952 | sequence_SO=chromosome | SO=protein_coding_gene | is_pseudo=false	MALPAFEGVSPCVGGDRRVSPSGSSVRFSSHSSRLGCFFFAFCFLSVSLFSPLGAKAQVVGLDLGSEFVKVALVAAGRPIEILLNPASKRKTNNAVSFADEEKRELGDEGAAQAAKKPDRVFLHPNLLLGVNATDFGLVDVTADPDSAFLPLALKEKLLPSGYPHDYYPYRLFMDRRRHSVAVLAKDGVYLPAELLTASMLAFVKKLATQAAGVDNEKTLGCVISVPCRYTQRQRQALRDAVEIAGMHAVAFHHHSVTAAVQHALDLPTNTTATKLFYDVGSSTIDVGVVRFAPVQLPSKKEVLQVQLLACESMSGAGGHHVDLAIAEKMRGAFERRYGAGKSLLGVPRALKKLVKQAVMAKHVLSANKQTQFRVEGLHNDVDFNEPFERMHLEALLEE…	0	193.026	42	34	93	34	952	104.9	5.95	267.03	34	0.988	0.991	0.986	1.005	0.993	0.996	0.992	1.002	0.995	1.006	-0.02	-0.01	-0.02	0.01	-0.01	-0.01	-0.01	0	-0.01	0.01	0.490484	0.618546	0.0924053	0.841971	0.622028	0.687212	0.784522	0.876159	0.778826	0.851829	0.996674	0.990049	0.971021
FALSE	High	Master Protein	TGGT1_268370-t26_1-p1	transcript=TGGT1_268370-t26_1 | gene=TGGT1_268370 | organism=Toxoplasma_gondii_GT1 | gene_product=Non-specific serine/threonine protein kinase [Source:UniProtKB/TrEMBL;Acc:S7WDQ9] | transcript_product=non-specific serine/threonine protein kinase | location=TGGT1_chrVIII:6481671-6517585(-) | protein_length=8429 | sequence_SO=chromosome | SO=protein_coding_gene | is_pseudo=false	MKDGAAGDPPPSGPSGPSGHPSLPERPSTFASAAPGQEQPSQVLSYFPSAGPGSGSASHHLGSTPSLPAVAAAPFPLPCETGLHHPSFSTPPGFAEAAPREYVSETGHVSSSAPISSTASLASSGHSAVSGPPEPLPGSLSAPAYPGTPVPAVMTPASLPGTGPAGPAEGNLMSGSRLPEAPAFPGVPQANLVAAGLPSGGLPPPAAFPTAREIASGVSSAAGLDPGSGPVAGPGCVAMAKSSPAASEPHLSASEAQPHKPPVRDEAGRSGEDTTRRKNMFPSSLTTLRVLTEFLRAAPAMCDDPNVPEIRGSELKDGSPFLLSDLSASASLSSSQFLSARVRAVRKCIGLLAENRGSEASCAAAVVLPAALLLLRRVTPVMKEGEVYVFRQSLLTLLR…	0	191.541	8	52	60	52	8429	903.6	6.39	135.89	52	0.975	0.98	0.977	1.058	1.031	1.037	1.034	1.026	1.059	1.047	-0.04	-0.03	-0.03	0.08	0.04	0.05	0.05	0.04	0.08	0.07	0.196155	0.191747	0.604286	0.20196	0.451475	0.207553	0.627448	0.236222	0.54976	0.499972	0.996674	0.989773	0.975418
FALSE	High	Master Protein	P21333	Filamin-A OS=Homo sapiens (Human) OX=9606 GN=FLNA PE=1 SV=4	MSSSHSRAGQSAAGAAPGGGVDTRDAEMPATEKDLAEDAPWKKIQQNTFTRWCNEHLKCVSKRIANLQTDLSDGLRLIALLEVLSQKKMHRKHNQRPTFRQMQLENVSVALEFLDRESIKLVSIDSKAIVDGNLKLILGLIWTLILHYSISMPMWDEEEDEEAKKQTPKQRLLGWIQNKLPQLPITNFSRDWQSGRALGALVDSCAPGLCPDWDSWDASKPVTNAREAMQQADDWLGIPQVITPEEIVDPNVDEHSVMTYLSQFPKAKLKPGAPLRPKLNPKKARAYGPGIEPTGNMVKKRAEFTVETRSAGQGEVLVYVEDPAGHQEEAKVTANNDKNRTFSVWYVPEVTGTHKVTVLFAGQHIAKSPFEVYVDKSQGDASKVTAQGPGLEPSGNIAN…	0	191.309	22	49	69	43	2647	280.6	6.06	174.64	49	1.066	1.055	1.023	0.996	1.062	1.051	1.019	1.058	1.052	1.035	0.09	0.08	0.03	-0.01	0.09	0.07	0.03	0.08	0.07	0.05	0.359207	0.521817	0.701025	0.962791	0.236539	0.0846155	0.525346	0.219684	0.152205	0.21375	0.996674	0.990049	0.980327
FALSE	High	Master Protein	TGGT1_209030-t26_1-p1	transcript=TGGT1_209030-t26_1 | gene=TGGT1_209030 | organism=Toxoplasma_gondii_GT1 | gene_product=Actin ACT1 [Source:UniProtKB/TrEMBL;Acc:A0A125YH17] | transcript_product=actin ACT1 | location=TGGT1_chrIb:1014618-1016180(+) | protein_length=376 | sequence_SO=chromosome | SO=protein_coding_gene | is_pseudo=false	MADEEVQALVVDNGSGNVKAGVAGDDAPRAVFPSIVGKPKNPGIMVGMEEKDCYVGDEAQSKRGILTLKYPIEHGIVTNWDDMEKIWHHTFYNELRVAPEEHPVLLTEAPLNPKANRERMTQIMFETFNVPAMYVAIQAVLSLYSSGRTTGIVLDSGDGVSHTVPIYEGYALPHAIMRLDLAGRDLTEYMMKILHERGYGFTTSAEKEIVRDIKEKLCYIALDFDEEMKAAEDSSDIEKSYELPDGNIITVGNERFRCPEALFQPSFLGKEAAGVHRTTFDSIMKCDVDIRKDLYGNVVLSGGTTMYEGIGERLTKELTSLAPSTMKIKVVAPPERKYSVWIGGSILSSLSTFQQMWITKEEYDESGPSIVHRKCF	0	191.023	49	16	193	13	376	41.9	5.16	536.96	16	1.002	0.981	0.981	1.011	1.014	0.992	0.992	0.991	0.99	1.01	0	-0.03	-0.03	0.02	0.02	-0.01	-0.01	-0.01	-0.01	0.01	0.925701	0.195968	0.0115073	0.548886	0.759566	0.737224	0.643911	0.588288	0.117088	0.216232	0.996674	0.989773	0.971021
FALSE	High	Master Protein	P04264	Keratin, type II cytoskeletal 1 OS=Homo sapiens (Human) OX=9606 GN=KRT1 PE=1 SV=6	MSRQFSSRSGYRSGGGFSSGSAGIINYQRRTTSSSTRRSGGGGGRFSSCGGGGGSFGAGGGFGSRSLVNLGGSKSISISVARGGGRGSGFGGGYGGGGFGGGGFGGGGFGGGGIGGGGFGGFGSGGGGFGGGGFGGGGYGGGYGPVCPPGGIQEVTINQSLLQPLNVEIDPEIQKVKSREREQIKSLNNQFASFIDKVRFLEQQNQVLQTKWELLQQVDTSTRTHNLEPYFESFINNLRRRVDQLKSDQSRLDSELKNMQDMVEDYRNKYEDEINKRTNAENEFVTIKKDVDGAYMTKVDLQAKLDNLQQEIDFLTALYQAELSQMQTQISETNVILSMDNNRSLDLDSIIAEVKAQYEDIAQKSKAEAESLYQSKYEELQITAGRHGDSVRNSKIEIS…	0	190.05	44	31	103	25	644	66	8.12	277.26	31	0.67	0.838	1.287	0.727	0.487	0.609	0.936	0.742	0.679	0.471	-0.58	-0.26	0.36	-0.46	-1.04	-0.72	-0.1	-0.43	-0.56	-1.09	0.164761	0.683613	0.306341	0.772433	0.512342	0.520137	0.941489	0.820421	0.735695	0.420518	0.996674	0.99327	0.971021
FALSE	High	Master Protein	TGGT1_224260-t26_1-p1	transcript=TGGT1_224260-t26_1 | gene=TGGT1_224260 | organism=Toxoplasma_gondii_GT1 | gene_product=PHD-finger domain-containing protein [Source:UniProtKB/TrEMBL;Acc:S7WBT2] | transcript_product=PHD-finger domain-containing protein | location=TGGT1_chrX:3059832-3081619(-) | protein_length=5658 | sequence_SO=chromosome | SO=protein_coding_gene | is_pseudo=false	MAGGSMQRAARQSRGRSGGRAGGGGGEGASGSLGDRGCSDTEEERFWIEKDVEFFSAINPRLLALLHHHKQSSEAFLSAVLPYLRSRSRKDAADAAGPSPRSEASQAFALRVPVRDFLRQDWTGGEIGGSVLSGSSAEERRDRRREEMIERDSDPPKRVASSPPCRSRSVEENLTERAVFSRDGRSICSKDPQGAREEASPSCDSLSSPVRRSSSASCLGISQPVSSEAGSEAGSSSVFASGATAVAAGFARTVPTSSRKGAASEGGENSPRSEGGNSVSSRVCSSQGSAPAPVVGCQAHPAPSRLSQVWPHHTGKILLERPSYSGETGRVIRHMWPATLLADVEPSALCPPPLLRSKKAAADPKKKDDSRAYVRTGIEKKNLEESSRLSCGTEETESR…	0	187.943	12	57	64	57	5658	602.2	6.54	123.12	57	0.983	0.969	0.989	1.043	1.025	1.01	1.031	1.008	1.035	1.023	-0.02	-0.05	-0.02	0.06	0.04	0.01	0.04	0.01	0.05	0.03	0.795291	0.634193	0.824403	0.446103	0.356285	0.595167	0.072843	0.591666	0.12259	0.694469	0.996674	0.990049	0.984106
FALSE	High	Master Protein	TGGT1_273090-t26_1-p1	transcript=TGGT1_273090-t26_1 | gene=TGGT1_273090 | organism=Toxoplasma_gondii_GT1 | gene_product=Cell division protein CDC48CY [Source:UniProtKB/TrEMBL;Acc:A0A125YX44] | transcript_product=cell division protein CDC48CY | location=TGGT1_chrVIII:3661986-3671254(-) | protein_length=811 | sequence_SO=chromosome | SO=protein_coding_gene | is_pseudo=false	MAGGIRRPQSVPAEKKEESQKKRSPNRLIVEEAINDDNSVVALNPAKMEELQIFRGDTVLLKGKMRHDTVCVVLADQDLDEGKIRLNKVVRKNLRVKLGDMVHVSACPDCPYGKRIHVLPLDDTIEGITGNLFDIYLKPYFMEAYRPVRKGDLFLVRGGFRPVEFKESLKIVVGVDPGEFCIVAPDTVIHCEGDPVKREEEERLDEVGYDDIGGCRKQMAQIREMIELPLRHPTLFKTLGVKPPRGVLLYGPPGSGKTLIAKAVANETGAFFFLINGPEVMSKMAGEAESNLRRAFEEAEKNAPAIIFIDEIDSIAPKREKTNGEVERRVVSQLLTLMDGLKGRGQVVVIGATNRQNSIDPALRRFGRFDREIDIGVPDDNGRLEILRIHTRNMKLAND…	0	187.245	49	33	119	29	811	89.3	5.11	267.27	33	0.983	0.99	0.991	1.008	0.991	0.998	0.999	0.99	0.978	1.023	-0.02	-0.01	-0.01	0.01	-0.01	0	0	-0.01	-0.03	0.03	0.407328	0.673033	0.23605	0.559127	0.747668	0.954572	0.9082	0.635113	0.34253	0.153401	0.996674	0.99327	0.971021
FALSE	High	Master Protein	TGGT1_216730-t26_1-p1	transcript=TGGT1_216730-t26_1 | gene=TGGT1_216730 | organism=Toxoplasma_gondii_GT1 | gene_product=MCM domain-containing protein [Source:UniProtKB/TrEMBL;Acc:S7VUI4] | transcript_product=MCM2/3/5 family protein | location=TGGT1_chrXI:5853958-5863220(-) | protein_length=1028 | sequence_SO=chromosome | SO=protein_coding_gene | is_pseudo=false	MASYVTDDFDRPEPGAPGADTTEGGEEDMTMTMSGHPGMMGETLEFQTNSMRRGGATNKQGGLRTRVISTMSEGGLESAEGALVNYEEEVKLQRQLGEESNIERGRRMKDLSNAFKRDLESVPAVRQQLDLLQNRAAAIVSGLESSAQSKEQSGDDDGALAGSAETCNQRLQLSISLLVQMADAVSFYDHPLIRNPCFALPALETAVQEVWRERGALGPAPRVGILGWLGHDHVTPRGLNSGKVNRLVCVEGVVNRCTAVQPKLSRAVYVNEMQGGQALPGPEDSEESQERQVYVRAFYDVANLDKDIRDTQPPPERDPTGLRVNRQELGYSYFKNVQRFFVQEAPETAPTGQLPRYVEVLVEEDLCDRVKCGDRVRVWGVYRPRMGATNGTSSGLVRP…	0	184.227	40	37	84	37	1028	113.2	5.21	172.41	37	0.991	1	1.005	1.039	1.03	1.039	1.044	0.997	0.996	0.996	-0.01	0	0.01	0.05	0.04	0.06	0.06	0	-0.01	-0.01	0.287451	0.987019	0.620618	0.388141	0.514317	0.254512	0.427078	0.85225	0.873373	0.660572	0.996674	0.998909	0.975418
FALSE	High	Master Protein	P02751	Fibronectin OS=Homo sapiens (Human) OX=9606 GN=FN1 PE=1 SV=5	MLRGPGPGLLLLAVQCLGTAVPSTGASKSKRQAQQMVQPQSPVAVSQSKPGCYDNGKHYQINQQWERTYLGNALVCTCYGGSRGFNCESKPEAEETCFDKYTGNTYRVGDTYERPKDSMIWDCTCIGAGRGRISCTIANRCHEGGQSYKIGDTWRRPHETGGYMLECVCLGNGKGEWTCKPIAEKCFDHAAGTSYVVGETWEKPYQGWMMVDCTCLGEGSGRITCTSRNRCNDQDTRTSYRIGDTWSKKDNRGNLLQCICTGNGRGEWKCERHTSVQTTSSGSGPFTDVRAAVYQPQPHPQPPPYGHCVTDSGVVYSVGMQWLKTQGNKQMLCTCLGNGVSCQETAVTQTYGGNSNGEPCVLPFTYNGRTFYSCTTEGRQDGHLWCSTTSNYEQDQKYS…	0	184.04	18	34	69	34	2477	272.2	5.5	179.94	34	1.033	1.028	1.075	0.975	1.007	1.002	1.048	1.044	1.086	1.086	0.05	0.04	0.1	-0.04	0.01	0	0.07	0.06	0.12	0.12	0.188298	0.0867025	0.33025	0.538021	0.886622	0.968455	0.626798	0.441168	0.180875	0.0362477	0.996674	0.989773	0.971021
FALSE	High	Master Protein	TGGT1_313410-t26_1-p1	transcript=TGGT1_313410-t26_1 | gene=TGGT1_313410 | organism=Toxoplasma_gondii_GT1 | gene_product=Proteasome 26S regulatory subunit [Source:UniProtKB/TrEMBL;Acc:S7W860] | transcript_product=proteasome 26S regulatory subunit | location=TGGT1_chrXI:3312986-3323185(+) | protein_length=1091 | sequence_SO=chromosome | SO=protein_coding_gene | is_pseudo=false	MANDENKKLVAIQASAKDPAQTGKEGKEKNGDKKKKVEDELTEEDKKIKEDMELLVERLQDPEPGVVALALQTLSVQLKAATSSMTSVPKPLKFLRPHIPVLIAHYHRLAPDDKIKPDFAMVLAVLCTTCGDGQRRSLHFCLEGGCRDIASWGFEFLRNLAGEVAAAFADIHGEEKKAGAVEEDLLASSDAAAGSPESPAPGETKAGEAKKPAEEEAKTKKPSLALQISMVVPLPTLAQLNAVVDLIVPYYMTHNAECDAIDLLSEVERVESVAAHVDSNNFQRVTLYLLAMANYAASLEEYTRVLGVAYTILLDQKQWFDAMRVALKMPNSDAEKTEKIQAVVEQCRAAGDPLMVKQLALLLGRQGVDFDFEDEQTQRLNSGEELSNFFLLLAKEMDV…	0	183.458	35	39	77	39	1091	117.6	5.1	190.74	39	0.99	0.984	1	1.031	1.021	1.014	1.032	1.026	1.039	1.024	-0.01	-0.02	0	0.04	0.03	0.02	0.04	0.04	0.06	0.03	0.20387	0.700486	0.985957	0.180695	0.168865	0.652312	0.435275	0.481471	0.100389	0.419947	0.996674	0.994325	0.998911
FALSE	High	Master Protein	TGGT1_249390-t26_1-p1	transcript=TGGT1_249390-t26_1 | gene=TGGT1_249390 | organism=Toxoplasma_gondii_GT1 | gene_product=ELFV_dehydrog domain-containing protein [Source:UniProtKB/TrEMBL;Acc:S7W941] | transcript_product=glutamate/leucine/phenylalanine/valine dehydrogenase family protein | location=TGGT1_chrXII:4441593-4452115(+) | protein_length=1206 | sequence_SO=chromosome | SO=protein_coding_gene | is_pseudo=false	MVHVSASLPFSFFPRLFLSQPRGTRSIWICRATQEACLPASHSRAVSGASLPFFRPAFAHIVPPLSLSLSARSSDSLSRVRPGLASGSLLCAKMETTLNGGGRAPSAVFHPSTSAPAICFPKRHASFSCYDGASGTSPSTTSGGSAGDLGAPVSRSLLGGRPVGKLGDSTLFGTVDLTATSEFRPMSQKYAAQYEEVKQILAQRGDLSKRVISANADAYYNHLGLNEYYFQTATAQTVASNLACVIAAKILNEFSHTDYFPQIQQERDGEVFLLARASLRNRKASQNFQVEREIEKKFLGLSGKTTPYRMQCYRSSGSFFDDPADENERLRTYFLQQPEYCAETTKDGVDPSETDLSKLLDVYFFANKRNTATAEIYRRLNEEVVRDSSGQNLFINVVP…	0	181.796	31	33	101	33	1206	135.4	7.37	251.26	33	0.985	0.957	0.976	1.011	0.995	0.967	0.987	1.014	0.996	0.986	-0.02	-0.06	-0.03	0.02	-0.01	-0.05	-0.02	0.02	-0.01	-0.02	0.389731	0.302079	0.00595257	0.561962	0.227922	0.182794	0.478997	0.550326	0.870902	0.211928	0.996674	0.989773	0.971021
FALSE	High	Master Protein	TGGT1_288360-t26_1-p1	transcript=TGGT1_288360-t26_1 | gene=TGGT1_288360 | organism=Toxoplasma_gondii_GT1 | gene_product=Tryptophanyl-tRNA synthetase (TrpRS2) [Source:UniProtKB/TrEMBL;Acc:A0A125YPX8] | transcript_product=tryptophanyl-tRNA synthetase (TrpRS2) | location=TGGT1_chrIX:2284649-2289081(+) | protein_length=689 | sequence_SO=chromosome | SO=protein_coding_gene | is_pseudo=false	MFFLSTSVIPGAAVFSVRFARNPTPCLLPRNSLPVHLRHTALTPRFLEHSNLAFGFFRRSISTGCSRTLRIKSTPVGVLFSAKMASRTPFQDAALSIVKGAACIALSLKTARTTQNVKFSKDNRCSITLGPIEVEPTAAEEALLKTLTKQKIEENCPFRVFTIPRDLATRMYQESYLDEFGIPANVKEVRLVVLPEWNINANMYPVLKSTGQIADIQFESVKFNEEKKQLCLSLHVVPGPDEQSPALAEEEKLGPEEIPSRAQVLPPSGVEGDDFGEGDDDQTITPWDVQAAEGGIDYNKLLKKFGCSSITPELISRIEALTGKRAHHLLRRGIFFSHRDLNLLLDSLEKRQARLASGKREDGPGSEGLSGPGFYLYTGRGPSSEALHIGHLVPFMFTK…	0	180.268	46	28	114	28	689	77	7.3	325.92	28	1.016	0.989	0.999	0.987	1.002	0.976	0.985	0.986	0.989	1.011	0.02	-0.02	0	-0.02	0	-0.04	-0.02	-0.02	-0.02	0.02	0.725002	0.0533322	0.948941	0.222734	0.960084	0.103365	0.430826	0.718534	0.40154	0.220861	0.996674	0.989773	0.992295
FALSE	High	Master Protein	TGGT1_317720-t26_1-p1	transcript=TGGT1_317720-t26_1 | gene=TGGT1_317720 | organism=Toxoplasma_gondii_GT1 | gene_product=Putative eukaryotic translation initiation factor 3 subunit 7 [Source:UniProtKB/TrEMBL;Acc:S7UGQ9] | transcript_product=putative eukaryotic translation initiation factor 3 subunit 7 | location=TGGT1_chrIV:2518527-2525070(+) | protein_length=609 | sequence_SO=chromosome | SO=protein_coding_gene | is_p…	MEQASEERPHFEHIANPGSLFGCHPQSAGWGPSTCDKEVRTECLAALAHLPFEPNVRPSLFSHQLFRACDFTFHVQQRQRDGRDPRGITVAFADEEQQFQTVDNRPLLRRGGGGGWLHKRRAPVKQSTAAFNEKNKEEEELRLGKKGKSEQKKQQQQQQARFARIHARHRAFSEWSVQPTNEWAVEAEIPLSQLYKHAVESGKIKVKDLAWRGELRTYNKQADQIRTKLPVALQNLSSNFDYYWVTTQDDDLIKEQMLNSSEPIDVAATDQVLACLMAAPQSKYSWHLHLTKVEGKLLIDKANGSIVDLLTVNETASEPPMQDAENRLNRPAALGFEAVKINQNLRQQLLVKGEEPVKFSPPPFVEAGDNPASIAYRYRMFTIPGRTGGTGGGKSRQPI…	0	180.247	43	22	66	22	609	68.7	6.93	182.51	22	0.997	1.01	1.004	1.009	1.006	1.019	1.013	0.998	1.004	1.004	0	0.01	0.01	0.01	0.01	0.03	0.02	0	0.01	0.01	0.215125	0.503253	0.808961	0.816871	0.875223	0.719493	0.540933	0.952841	0.934892	0.899779	0.996674	0.990049	0.984106
FALSE	High	Master Protein	TGGT1_310670-t26_1-p1	transcript=TGGT1_310670-t26_1 | gene=TGGT1_310670 | organism=Toxoplasma_gondii_GT1 | gene_product=Alpha-1,4 glucan phosphorylase [Source:UniProtKB/TrEMBL;Acc:S7UT34] | transcript_product=putative glycogen phosphorylase 1 | location=TGGT1_chrXI:1474522-1478513(+) | protein_length=912 | sequence_SO=chromosome | SO=protein_coding_gene | is_pseudo=false	MANAADENVFANDSSYHWEMRRKASFSKLTGAVPRAIPGMYNEEDPHADEKKEKLWKLMETYISSDIHSIQRSIVNHVEYTCARTRFNCDPESCYRASAFSVRDRLIETLNDTNAYFHEKDCKRAYYLSLEFLLGRAFQNALVNLDIENNYKKALAELGFNLEQLYEFEHDPALGNGGLGRLAACFLDSMATVNLPCWGYGIRYTYGIFEQKIVNGRQVEHPDYWLTMSNPWEIERPDCTYAVRFYGSVKEYRDVQTGRMRSKWVEGEIVQAMAYDNPIPGFDTYNTINLRLWKAAPGKEFDFHLFNVGRYLESVRERQRAESISAVLYPNDNTLEGKELRLKQQYFFVCATVQDVLRRFKKVSNRDWNDLPSKVQMQLNDTHPTIAIPELMRILLDVE…	0	179.987	44	36	102	36	912	105.4	6.58	262.34	36	1.043	1.012	1.007	0.991	1.034	1.002	0.998	0.992	0.979	0.992	0.06	0.02	0.01	-0.01	0.05	0	0	-0.01	-0.03	-0.01	0.200969	0.230391	0.748533	0.741467	0.524337	0.923592	0.709647	0.879115	0.423831	0.807813	0.996674	0.989773	0.982405
FALSE	High	Master Protein	TGGT1_231640-t26_1-p1	transcript=TGGT1_231640-t26_1 | gene=TGGT1_231640 | organism=Toxoplasma_gondii_GT1 | gene_product=Alveolin domain containing intermediate filament IMC1 [Source:UniProtKB/TrEMBL;Acc:A0A125YFV6] | transcript_product=alveolin domain containing intermediate filament IMC1 | location=TGGT1_chrVIII:1511977-1514752(+) | protein_length=609 | sequence_SO=chromosome | SO=protein_coding_gene | is_pseudo=false	MFKDCADPCSDCCQPAEQQRGQATLPSHVVLPQTSDSPAIHVTAEASQRLSSPRALQQLHGTQESVRSVTLEERADRSRTVPIGEETERQWVAITAYQPIDTVTKTVEVPVVRTVETYVPKVVVEEKIVEVPKYIPEYVEKVVEVPEVQYVDKIVEVPEYQYEYKYVPKIETKENIIQRPKYETKYIEKVVEVAQVKEVVRYQDVEEVEEIIRYVPKDSVVPEEWKRIQEEQDKREAELKEKEAKEEEELKGLLEEERKLHEERVREQIKVQQQIIQQQLSARAEQERLLKERREAEMVHFPAVEGAPPLPTIPKVEQVFKPKVIKQVEIQKHVPISVDVPVPYMVPKPVVVSVQVPVLKFRDHFVPVPVRRRVVPRIRWTNEVYEVECIKEKPFLQVQ…	0	175.808	44	25	109	25	609	69.6	5.19	318.51	25	0.991	0.998	0.998	0.97	0.962	0.969	0.969	0.971	0.969	0.984	-0.01	0	0	-0.04	-0.06	-0.05	-0.05	-0.04	-0.04	-0.02	0.743399	0.698018	0.901398	0.456297	0.557623	0.474862	0.306121	0.432787	0.438381	0.692106	0.996674	0.994325	0.991016
FALSE	High	Master Protein	TGGT1_231480-t26_1-p1	transcript=TGGT1_231480-t26_1 | gene=TGGT1_231480 | organism=Toxoplasma_gondii_GT1 | gene_product=TOG domain-containing protein [Source:UniProtKB/TrEMBL;Acc:S7WJ42] | transcript_product=putative GCN1 | location=TGGT1_chrVIII:1452018-1468462(-) | protein_length=3416 | sequence_SO=chromosome | SO=protein_coding_gene | is_pseudo=false	MSAGCGSEEAHNGAGPPADTPLAAEDSVSLSDALQSSSLAARGGSYLDELANSLDVVLSILQSRSAEGDSEVGLPVIRDPSIINLLTSAVLMNVATTPDITKAASSQLQQVLSVVRTALVTEAHVAAGSPVTDSGNALPVLTSFCQAAQQAFKRVRTAPAAVAEAAVARFLGVLCEVVHNLSEADAKVICEHPPCSAVFGNSLVLLSRTLAPAAKQASTVASGMKTETDILTVLERQLWQPVEGGLGVPLLRGSAVRLLERLCHLSPSIRELLLQHVTKGLSSPLSEGDFGPYISVYILGRYLRQILLSSGTFRCRGNKGGDSPGSHTALDDEKKKLLAAKKATALEMRNALLKVYIQAVVEARQPVGGVLCASFRPLLSLVQEGDWSLVLPPLKRGLK…	0	175.578	15	48	77	48	3416	362.4	7.03	174.62	48	1.003	1.013	0.973	0.999	1.002	1.012	0.972	1.003	0.996	1.014	0	0.02	-0.04	0	0	0.02	-0.04	0	-0.01	0.02	0.846338	0.479451	0.00685509	0.977813	0.966395	0.610887	0.505758	0.9391	0.511837	0.747733	0.996674	0.990049	0.971021
FALSE	High	Master Protein	TGGT1_261950-t26_1-p1	transcript=TGGT1_261950-t26_1 | gene=TGGT1_261950 | organism=Toxoplasma_gondii_GT1 | gene_product=ATP synthase subunit beta [Source:UniProtKB/TrEMBL;Acc:A0A125YYY4] | transcript_product=ATP synthase beta subunit ATP-B | location=TGGT1_chrVIIb:1457013-1460114(-) | protein_length=560 | sequence_SO=chromosome | SO=protein_coding_gene | is_pseudo=false	MASPALQTCWRNLARLSGAQVRPSHFGAFSLGSRMSPFSSLLGARASPIATGRAGLRFLSSAAPNPGKKPASAAPPAGTNHGRITQVIGAVVDVHFDEQLPPILNSLEVQGHTNRLVLEVAQHLGENTVRTIAMDATEGLVRGQKVVDTGAPIQVPVGVETLGRIMNVIGEPVDECGPVPAKKTYSIHRAAPLFADQSTEPGLLQTGIKVVDLLAPYAKGGKIGLFGGAGVGKTVLIMELINNVANKHGGFSVFAGVGERTREGNDLYHEMMTTGVIKRKKLEDGKFDFTGSKAALVYGQMNEPPGARARVALTALSVAEYFRDEQGQDVLLFIDNIYRFTQAGSEVSALLGRIPSAVGYQPTLATDLGQLQERITTTKKGSITSVQAVYVPADDLTDP…	0	174.445	50	21	73	18	560	59.9	6.87	200.29	21	0.997	0.992	0.995	1.006	1.002	0.998	1.001	0.997	0.985	1.001	0	-0.01	-0.01	0.01	0	0	0	0	-0.02	0	0.863296	0.656225	0.833774	0.875594	0.88943	0.931486	0.957493	0.934888	0.0584543	0.967195	0.996674	0.990049	0.984106
FALSE	High	Master Protein	TGGT1_265250-t26_1-p1	transcript=TGGT1_265250-t26_1 | gene=TGGT1_265250 | organism=Toxoplasma_gondii_GT1 | gene_product=RRM domain-containing protein [Source:UniProtKB/TrEMBL;Acc:S7UGW5] | transcript_product=RNA recognition motif-containing protein | location=TGGT1_chrIX:1478253-1487922(+) | protein_length=1564 | sequence_SO=chromosome | SO=protein_coding_gene | is_pseudo=false	MTQGSTEPALPVAEGGKCEETVLSSPADAAPKSTPSDSPSCSVVPPGAAAPPSDTPDRQAPSEKQEARTSTLSAKHEEGAARAQPEATPGPGKSQEEETGDGSASPASAGKKEEKSGETTTSTVRVHRWADESDDLDSPSFDPMSSAEVEPPEFDLGMSGYQPPSVRSTGNGIVSHADAGGYRRGVPGQSSFSGGYGGLVDSRFGGLVNPPHGHPHGPPASVGLGDGGFMQGGVTGPFTEVYVAELDAHVTEEDVSSIFAPGLTVRNVRIVREQANRGNKGGPNATCGAYVTFHSPEDAQRALAFHGKLYRPPRGAGLSSSQGLRGSSRQAGSGGSGVSARVLRISAISSPPLLSGEGGSPYLLSRATRSGSLGHLHSAGSPHLLPRGGRGFGGVYGQA…	0	173.973	35	45	74	45	1564	160.1	8.51	164.88	45	1.019	1.011	1.013	0.98	0.998	0.991	0.993	0.969	0.954	0.983	0.03	0.02	0.02	-0.03	0	-0.01	-0.01	-0.05	-0.07	-0.02	0.583776	0.392118	0.396465	0.1471	0.964738	0.212619	0.353703	0.236594	0.149165	0.0821159	0.996674	0.990049	0.971021
FALSE	High	Master Protein	TGGT1_226250-t26_1-p1	transcript=TGGT1_226250-t26_1 | gene=TGGT1_226250 | organism=Toxoplasma_gondii_GT1 | gene_product=DEAD (Asp-Glu-Ala-Asp) box polypeptide DDX3X [Source:UniProtKB/TrEMBL;Acc:A0A125YSI6] | transcript_product=DEAD (Asp-Glu-Ala-Asp) box polypeptide DDX3X | location=TGGT1_chrX:1667417-1670378(+) | protein_length=734 | sequence_SO=chromosome | SO=protein_coding_gene | is_pseudo=false	MDSQQQLSPAVDSAVGSRVGQAAGLQQPKRYVPPHLRNRPPAQDNFSGAGGYPEYPSSSNALSSQAHGQTYSPTDRTFNSSSSNGLAAGSPGQNQQTGRRYVPPGSGDRFSCLGAGGARYTPPNTTYNTPAGGQGEIPGNAAGNAQGGVYNARAAAMQQGGYGSSRTMRASVTGTGWDVRDGRRYVPEKEKDVFSSDKLQSTGIKFDSYDKVPVELKGRGAERIMAIESFQTPGMQIHPLLLQNVSRVNYTKPTPIQKNSIPTILSGRDLMACAQTGSGKTAAFLYPIIARMLQDGPPPLPQAAAGGGSGYRKPPAYPICLVLSPTRELAMQIYEEARKFQFGTGVRTVAVYGGSDVKRQLIDLDGGCDICVATPGRLVDLLERRKVRLGLVQFFVLDE…	0	173.544	54	29	66	28	734	78.5	9.09	182.75	29	0.969	0.98	0.972	1.021	0.989	1.001	0.992	1.018	1.004	0.999	-0.05	-0.03	-0.04	0.03	-0.02	0	-0.01	0.03	0.01	0	0.345106	0.360048	0.169746	0.536473	0.237892	0.945171	0.709796	0.80221	0.846795	0.964771	0.996674	0.990049	0.971021
FALSE	High	Master Protein	TGGT1_266960-t26_1-p1	transcript=TGGT1_266960-t26_1 | gene=TGGT1_266960 | organism=Toxoplasma_gondii_GT1 | gene_product=Tubulin beta chain [Source:UniProtKB/TrEMBL;Acc:A0A125YWG4] | transcript_product=beta-tubulin | location=TGGT1_chrIX:705551-707606(-) | protein_length=449 | sequence_SO=chromosome | SO=protein_coding_gene | is_pseudo=false	MREIVHVQGGQCGNQIGAKFWEVISDEHGIDPTGTYCGDSDLQLERINVFYNEATGGRFVPRAILMDLEPGTMDSVRAGPFGQLFRPDNFVFGQTGAGNNWAKGHYTEGAELIDSVLDVVRKEAEGCDCLQGFQITHSLGGGTGSGMGTLLISKVREEYPDRIMETFSVFPSPKVSDTVVEPYNATLSVHQLVENADEVQVIDNEALYDICFRTLKLTTPTYGDLNHLVSAAMSGVTCCLRFPGQLNSDLRKLAVNLIPFPRLHFFLIGFAPLTSRGSQQYRALSVPELTQQMFDAKNMMCASDPRHGRYLTASAMFRGRMSTKEVDEQMLNVQNKNSSYFVEWIPNNMKSSVCDIPPKGLKMSVTFVGNSTAIQEMFKRVSDQFTAMFRRKAFLHWYT…	0	172.482	56	19	132	7	449	50	4.81	356.73	19	1.001	0.996	0.995	1	1.001	0.996	0.995	1.002	0.979	1.012	0	-0.01	-0.01	0	0	-0.01	-0.01	0	-0.03	0.02	0.979194	0.890205	0.501423	0.997318	0.958586	0.778975	0.811527	0.960821	0.0851032	0.660937	0.999123	0.998909	0.973444
FALSE	High	Master Protein	TGGT1_257990-t26_1-p1	transcript=TGGT1_257990-t26_1 | gene=TGGT1_257990 | organism=Toxoplasma_gondii_GT1 | gene_product=Putative heat shock protein 101 [Source:UniProtKB/TrEMBL;Acc:S7UZ38] | transcript_product=putative heat shock protein 101 | location=TGGT1_chrVIIb:3637480-3646383(+) | protein_length=927 | sequence_SO=chromosome | SO=protein_coding_gene | is_pseudo=false	MDADSWTTLVKKAFLAGQEVCRERKNPQLDPLHLLEAMLQDKQSFATQVLSQCPGDFEQLKEDVHLAVLKFPQQHPPPDFPSPNHSLMAVLRHAKDIQKKMNDSLMSADSLFSALIQEKGIRSHLTAAGFMMKQIEEKAKSVRGSKKIASSDDDANFEALKKYGTDFTDLAEKGKLDPVIGREDEIRRVIRILCRRTKNNPVLIGEPGVGKSAVVEGLARRIVEHDVPSNLRCRLVSLDVGSLIAGAKFRGEFEERLTAVLQEVKDAAGKIILFIDEIHVILGAGKTEGALDAANLLKPMLARGELRCIGATTLDEYRKYVEKDAAFERRFQQVHVREPSVQATISILRGLKDRYASHHGVRILDSALVEAAQLADRYITSRFLPDKAIDLMDEACAIA…	0	172.224	42	32	63	31	927	104.2	6.51	168.79	32	1.016	1.013	0.993	0.975	0.991	0.988	0.969	0.972	0.988	0.979	0.02	0.02	-0.01	-0.04	-0.01	-0.02	-0.05	-0.04	-0.02	-0.03	0.679857	0.582524	0.446242	0.363904	0.608432	0.0235464	0.382311	0.110651	0.640266	0.71536	0.996674	0.990049	0.973444
FALSE	High	Master Protein	TGGT1_211680-t26_1-p1	transcript=TGGT1_211680-t26_1 | gene=TGGT1_211680 | organism=Toxoplasma_gondii_GT1 | gene_product=Protein disulfide-isomerase [Source:UniProtKB/TrEMBL;Acc:A0A125YQI9] | transcript_product=protein disulfide isomerase | location=TGGT1_chrIV:1556190-1558014(+) | protein_length=471 | sequence_SO=chromosome | SO=protein_coding_gene | is_pseudo=false	MRAGFSFALLAVGLLATAVVYSAAEEEAVTVLTASNFDDTLKNNEIVLVKFYAPWCGHCKRMAPEYEKAAKTLKEKGSKIVLAKVDATSETDIADKQGVREYPTLTLFRKEKPEKYTGGRTAEAIVEWIEKMTGPAVTEVEGSAEDKVTKEAPIAFVAELASKDSDMAKLFEEVANESRQLGRFLAKYGASDEKIYSLRYEEGTEAFTGKTKDELKKFVDTESFPLLGPINAENFRKYIDRDLDLVWLCGTEKDFDEAKTAVREAAKKLRDTRSFVWLDTDQFKGHAENALGITEFPGLVFQSKKGRFVLPEATTSLKDAAKISQFFDDVEAGKIDRSLKSEPVPEKQDEAVKVVVGKNFEEMVIQKDKDVMLEIYAPWCGYCKSFEPIYKEFAEKYKD…	0	172.003	51	25	138	24	471	52.8	5.22	330.18	25	1.003	1.003	1.005	0.954	0.957	0.957	0.958	0.955	0.938	0.98	0	0	0.01	-0.07	-0.06	-0.06	-0.06	-0.07	-0.09	-0.03	0.863682	0.264031	0.820015	0.470151	0.585777	0.481426	0.36053	0.498003	0.368901	0.589561	0.996674	0.989773	0.984106
FALSE	High	Master Protein	TGGT1_321500-t26_1-p1	transcript=TGGT1_321500-t26_1 | gene=TGGT1_321500 | organism=Toxoplasma_gondii_GT1 | gene_product=RNA recognition motif-containing protein [Source:UniProtKB/TrEMBL;Acc:A0A125YP61] | transcript_product=RNA recognition motif-containing protein | location=TGGT1_chrIb:1771014-1773404(+) | protein_length=475 | sequence_SO=chromosome | SO=protein_coding_gene | is_pseudo=false	MEGAIPQAGEMENGATVGAPVSGVPRPAGHMAPRVEIKLFVGRVPQSMEDAALRPIFEEFGEVKEAVIIRDKATGKHKNSAFIKMDSIAAADAAIRGLNSTRILEQSMGPITVKYATGEAEKLGFATSSCEPGQDQAKLFIGSIPRTMTEEEVRQFFSTYGTVEEVFVMKDNVQNTGKGCCFVKFAFKEEALHAVRTLSGKHTFEGCTRPVEVRFAESKAARQQQMMNQQAMGGPQGMRGPGRMGNMGGMGASNMGGMGGPAMGMGSSTQMGTPNNSNPRAAGQWKEYFTQDGRAYYHNEYTNVTTWDRPQEFYQLPPAPPHMGGAGGMAAGSGQSSNAEGPPGANIFVFHVPNEWTYYDLMQNFGGFGNVVSARVATDRTTGRNRGFAFVSYDNVESA…	0	171.852	44	17	92	17	475	50.9	8.35	269.9	17	0.995	0.986	0.984	1.021	1.016	1.006	1.005	0.993	1.008	1.024	-0.01	-0.02	-0.02	0.03	0.02	0.01	0.01	-0.01	0.01	0.03	0.207541	0.0321633	0.292424	0.0298859	0.0219231	0.0247918	0.66083	0.262426	0.485865	0.376145	0.996674	0.989773	0.971021
FALSE	High	Master Protein	TGGT1_226960-t26_1-p1	transcript=TGGT1_226960-t26_1 | gene=TGGT1_226960 | organism=Toxoplasma_gondii_GT1 | gene_product=Pyrophosphate--fructose 6-phosphate 1-phosphotransferase [Source:UniProtKB/TrEMBL;Acc:A0A125YKV5] | transcript_product=phosphofructokinase PFKII | location=TGGT1_chrX:1093641-1104060(-) | protein_length=1225 | sequence_SO=chromosome | SO=protein_coding_gene | is_pseudo=false	MTFLSFFKCAKGTTSAHPEADAVETFFESQASSQSHLFSPQLADEATPNEVARRHFKPVLPPVFSSPTGVVTVPCNDTDLVNKQDEVNNAPHVLSAQDQDILASLFPNTINTNFCLLAPASGDRQASSEPLRVGVVLSGGQAAGGHNVICGIFDYVKRVNPASTVFGFLGGPHGVFSHEYVELTEAIIDKYRNMGGFDMIRSGRHKIETDEQKQKSLEICEKLQLNGLVVIGGDDSNTNAAILAEYFKSKGSSTSVCGCPKTIDGDLKNRFVEISFGFDTACKTYCQQIGNLMRNAMTGGNTYHFVRLMGRSASLITLECALQTHPNYTFIGEEVMAKKQSLRQLVEALVDLVEARYAKGKQYGVVLLPEGLIEFIPEVGVLINEINHIVAAGDFEVSK…	0	170.38	32	34	90	33	1225	131.3	6.24	226.18	34	0.966	0.965	0.953	1.036	1.001	0.999	0.987	1.018	1.003	1.018	-0.05	-0.05	-0.07	0.05	0	0	-0.02	0.03	0	0.03	0.198553	0.193698	0.019322	0.422462	0.978764	0.957681	0.730471	0.536879	0.935793	0.630448	0.996674	0.989773	0.971021
FALSE	High	Master Protein	TGGT1_236970-t26_1-p1	transcript=TGGT1_236970-t26_1 | gene=TGGT1_236970 | organism=Toxoplasma_gondii_GT1 | gene_product=SWI2/SNF2-containing PHD finger protein [Source:UniProtKB/TrEMBL;Acc:S7VZH4] | transcript_product=SWI2/SNF2-containing PHD finger protein | location=TGGT1_chrX:5508193-5518721(+) | protein_length=2556 | sequence_SO=chromosome | SO=protein_coding_gene | is_pseudo=false	MGSQGVRSGSASRSGSGENSRSSSCARDASSSPPRSTFNSPRLRAQAERQAAAQAEAVASSSSMPRNGCQSSVAAGVSSGRSTKFSGSFFSQASSSGAGRSKRGGMWCYICRDSMQRGEENTVECTACPKRFHMECLQQEGVIQPGERVAADDWMCPQCLEEHEEDEIQNDERCFICKRKEPEDEEEDRLLMCDGCPNSYHMRSCLKLTIEPDEEKWFCPECNPSGFKQDEIRRLGRGRAGAGTTEGRGEIVNSSTCYVCQRPGKLLGCDFCVNSFHPTCLVDVDWDAIGEEWECPVCKGHDPLANQMHKRWSRAEIDAKRKERIKCLERIRVKTTRYRNRFLLVNQKDLGPFVNQKVLNNLAKSFRAQMNANASGKRRGPQAQCGRLQVERSIQDLLE…	0	169.944	20	40	61	40	2556	277.7	7.68	148	40	0.993	1.05	1.051	1.025	1.018	1.076	1.077	1.003	1.062	1.021	-0.01	0.07	0.07	0.04	0.03	0.11	0.11	0	0.09	0.03	0.396307	0.184135	0.145017	0.607467	0.733774	0.378447	0.357286	0.947286	0.442682	0.663194	0.996674	0.989773	0.971021
FALSE	High	Master Protein	TGGT1_219860-t26_1-p1	transcript=TGGT1_219860-t26_1 | gene=TGGT1_219860 | organism=Toxoplasma_gondii_GT1 | gene_product=DNA helicase [Source:UniProtKB/TrEMBL;Acc:S7V1T5] | transcript_product=putative replication licensing factor | location=TGGT1_chrXII:515884-525132(-) | protein_length=972 | sequence_SO=chromosome | SO=protein_coding_gene | is_pseudo=false	MDSLASPSRPASRVSGRVSGANAPGNEERRESGRTSFFPSASLGQTQGASLAEGEHAVGSSLEQGDGRDPARMQDENFANIFVHFLQTFQHEEEEEDEADGGRLAPSAIADLPEEIAEAYYMRAMARLIRESHGNRTLVVRLEHVESWQPQGAPVQDAGMRLAEHIRRNYIRIRSRLQESFQLLMEKLAAQMNAPQFSYFLQVVGAQKYVHEIGNIRCNMLGSLLSIRGQVTRTTDVRPELLKAAFKCLECGTIEPDVEQQFKYTQPRQCRGVNCNNTTNWELLFERCRYGDWQKIRLQEPSNASASSSAVPRSLDIIARHDLVDSVYAGDVVVVSGALVALPDLAPLMRPGQLGRRDRPRRNEASLGVTPLTGLKGLGVREMNFRISLLAVDVQTEGE…	0	169.151	37	29	58	29	972	108.1	5.08	153.77	29	0.986	0.984	0.967	1.062	1.048	1.045	1.027	0.992	1.012	1.018	-0.02	-0.02	-0.05	0.09	0.07	0.06	0.04	-0.01	0.02	0.03	0.586838	0.672116	0.517838	0.330698	0.213127	0.0876216	0.0158311	0.500647	0.662574	0.516801	0.996674	0.99327	0.973444
FALSE	High	Master Protein	TGGT1_311230-t26_1-p1	transcript=TGGT1_311230-t26_1 | gene=TGGT1_311230 | organism=Toxoplasma_gondii_GT1 | gene_product=hypothetical protein | transcript_product=hypothetical protein | location=TGGT1_chrXI:1844321-1862670(+) | protein_length=4603 | sequence_SO=chromosome | SO=protein_coding_gene | is_pseudo=false	MSAFRQAADFLSVCFMALERVCIPRSRHSSPASFVLPFLVLSVAGLCSPAISAWTWLLLTVAGLILLSIHSLGLLLTSDRDASSCDSSPFESACVTRCASTSDVLSFDSLASRSSSRAAFASDACGRLASLCHVRAFSTPHLESQVSAGTDPPEKPSASAQTAPPSPRLCRQRSGVSPPPLAIRSCSDSPSVAPSSPPLAFFSYEELNPNRTPGTEEDRSEAARVEGAEESFLACVPEPSEPSPISDTETSCAPVCARSVARDDTPNRSGCASAFPLGLFSTVEPSPSVTGPSAAGKTSQAASEECAAVCLPRATPAVSVECEDAESEGTETLESSPQPVSLLFTDRFSHAAPADIPPPLEAPAGGSATSHASKGVASLDARTLEGSVSFIGCLPSGTR…	0	167.832	10	36	76	36	4603	494.5	4.88	163.73	36	0.989	0.999	1	1.025	1.014	1.024	1.025	1.006	1.008	1.04	-0.02	0	0	0.04	0.02	0.03	0.04	0.01	0.01	0.06	0.202448	0.964331	0.902857	0.0613585	0.269905	0.320276	0.0324968	0.300308	0.509367	0.315151	0.996674	0.998909	0.991016
FALSE	High	Master Protein	TGGT1_290670-t26_1-p1	transcript=TGGT1_290670-t26_1 | gene=TGGT1_290670 | organism=Toxoplasma_gondii_GT1 | gene_product=CYTOSOL_AP domain-containing protein [Source:UniProtKB/TrEMBL;Acc:S7UP88] | transcript_product=leucyl aminopeptidase LAP | location=TGGT1_chrIX:3637150-3642271(+) | protein_length=781 | sequence_SO=chromosome | SO=protein_coding_gene | is_pseudo=false	MVPPTPGASCLLSRTRQRNVLPLACSLCLYTVTVCSALRRDPTFLLNQLKIGPQFAHFSPFVETGRTSSHSGVSPSTFSGSLRSRQHAFTMRPSSFPAFLVKLPAKHKNQCRQSAAALAGSTACWQSSLHAPACAFPFSRRNGGHPERRDAPSLSSPRSSPASFLSVLRPVTSPLPCVWKAGTPHARPLALPLPPVRTASLATFSSGSSPRLSSNHSEMSRVPAPLTVVKTDPTAIPFVGCQPAKKVRMEAVDISEAEKYSGDLIVFSVLAPGCFHDAPNASQPQKGPIALPELAQKFDDAVGQGMLKDAVEAADFKAKMGSQVFVRLPSKSAPAVKHLAALGFGSIAEVTPSAVTKAAAAFASMLLRGSGEKAKTVAVVLPTCQKVCPSAEGQRKTRE…	0	167.729	43	28	92	28	781	83.1	8.88	211.84	28	0.977	0.981	0.963	1.046	1.022	1.025	1.007	1.02	1.028	1.039	-0.03	-0.03	-0.05	0.06	0.03	0.04	0.01	0.03	0.04	0.06	0.636725	0.483924	0.248306	0.0442717	0.632334	0.351139	0.655369	0.245217	0.24943	0.0144971	0.996674	0.990049	0.971021
FALSE	High	Master Protein	TGGT1_215260-t26_1-p1	transcript=TGGT1_215260-t26_1 | gene=TGGT1_215260 | organism=Toxoplasma_gondii_GT1 | gene_product=Carbamoylphosphate synthetase [Source:UniProtKB/TrEMBL;Acc:S7UPU1] | transcript_product=carbamoylphosphate synthetase | location=TGGT1_chrX:6736108-6760149(-) | protein_length=1699 | sequence_SO=chromosome | SO=protein_coding_gene | is_pseudo=false	MGVHHALDDAGEMPHSGGRRAVAPIYPLDLAGRLRPAMLVLADGTEFLGYSFGYPGSVGGEVVFNTGMVGYPESLTDPSYEGQILVLTYPLIGNYGVPSSEKDEHGLPKYFEGDRIYVRALVVADYDNAAVTAHFRAENSLSAWMNTHKVPAIAGVDTRALTKHLREVGCMLGKIVVLSEEEERRSGLSLSALAALPSATAAEQRGENDATVTPDKAEARLRVERRQAALTMWEEAIRNKAKNLPWEDPNKDNLVALVSRKEVRVYKSTVVDPNLRDVLILCVDCGMKYNIYRQLLHSKFEHCNIILKVVPWDFDFGNDEFDGLFISNGPGDPERCEKTVANIRRVMERKIPIFGICLGNQLLALAAGARTYKMKYGNRGMNQPVIDLRTSRCYITPQN…	0	166.604	27	42	76	42	1699	187	6.47	193.85	42	0.998	1.013	1.026	0.984	0.982	0.996	1.01	1.003	1.012	1.017	0	0.02	0.04	-0.02	-0.03	-0.01	0.01	0	0.02	0.02	0.955512	0.748687	0.437686	0.69602	0.0339909	0.162282	0.528007	0.895877	0.343466	0.662749	0.998956	0.995152	0.973444
FALSE	High	Master Protein	TGGT1_318230-t26_1-p1	transcript=TGGT1_318230-t26_1 | gene=TGGT1_318230 | organism=Toxoplasma_gondii_GT1 | gene_product=Phosphoglycerate kinase [Source:UniProtKB/TrEMBL;Acc:S7VZ21] | transcript_product=phosphoglycerate kinase PGKI | location=TGGT1_chrIV:1413955-1416908(+) | protein_length=417 | sequence_SO=chromosome | SO=protein_coding_gene | is_pseudo=false	MLANKLGIQDVGAQLTGKSVLIRVDFNVPMKDGVVQDATRIKATLPTLEYALSKNPRCLVLLSHAGRPDGRVQMKYTLKPVAAALQEFLPKKVTFVEDCVGPKAEEAVQAAKNGEILVMENVRFHIEEEGKGVDEQGNKIKASPEAIAKFKADLTKLGDIYINDAFGTAHRAHASMVGIEVPVRAAGLLMKKELDYFSKALECPEKPFLAILGGAKVRDKIQLIENMLDRVQMMIVAGGMAFTFKKVLDNMPIGDSLFDEEGAKIVPDIMAKAKAKGVEMLFSCDFLCADKFDNNANTQICEDKTGIPDGWMGVDIGPKTVEKATEMILRAKTLVWNGPPGVFEMSNFAKGSIAFCGAVAKATEKGCITIVGGGDTAALVEREGYASKVSHVSTGGGAS…	0	166.131	74	28	83	27	417	44.6	6.99	219.23	28	0.988	0.992	0.973	1.006	0.994	0.998	0.979	1.003	0.974	1.003	-0.02	-0.01	-0.04	0.01	-0.01	0	-0.03	0	-0.04	0	0.754673	0.63914	0.13983	0.0942526	0.869383	0.907561	0.152707	0.881164	0.0870468	0.827425	0.996674	0.990049	0.971021
FALSE	High	Master Protein	TGGT1_316400B-t26_1-p1	transcript=TGGT1_316400B-t26_1 | gene=TGGT1_316400B | organism=Toxoplasma_gondii_GT1 | gene_product=Tubulin alpha chain [Source:UniProtKB/TrEMBL;Acc:S7UL74] | transcript_product=alpha tubulin TUBA1 | location=TGGT1_chrXI:5219470-5220918(+) | protein_length=432 | sequence_SO=chromosome | SO=protein_coding_gene | is_pseudo=false	ELFCLEHGIQPDGQMPSDKTIGGGDDAFNTFFSETGAGKHVPRCVFLDLEPTVVDEVRTGTYRHLFHPEQLISGKEDAANNFARGHYTIGKEIVDLSLDRIRKLADNCTGLQGFLMFNAVGGGTGSGLGCLLLERLSVDYGKKSKLNFCSWPSPQVSTAVVEPYNSVLSTHSLLEHTDVAVMLDNEAIYDICRRNLDIERPTYTNLNRLIAQVISSLTASLRFDGALNVDVTEFQTNLVPYPRIHFMLSSYAPIISAEKAYHEQLSVAEITNSAFEPASMMAKCDPRHGKYMACCLMYRGDVVPKDVNAAVATIKTKRTIQFVDWCPTGFKCGINYQPPTVVPGGDLAKVMRAVCMISNSTAIAEVFSRMDHKFDLMYAKRAFVHWYVGEGMEEGEFSE…	0	165.727	56	18	122	12	432	47.8	5.05	369.35	18	0.997	1.011	1	1.008	1.005	1.02	1.009	1.021	1.013	1.021	0	0.02	0	0.01	0.01	0.03	0.01	0.03	0.02	0.03	0.95206	0.78631	0.99679	0.813228	0.810344	0.13036	0.301319	0.330276	0.434571	0.334313	0.998956	0.995152	0.999286
FALSE	High	Master Protein	TGGT1_227948-t26_1-p1	transcript=TGGT1_227948-t26_1 | gene=TGGT1_227948 | organism=Toxoplasma_gondii_GT1 | gene_product=M16C_associated domain-containing protein [Source:UniProtKB/TrEMBL;Acc:S7W5W7] | transcript_product=peptidase M16 inactive domain-containing protein | location=TGGT1_chrX:626225-636243(+) | protein_length=1306 | sequence_SO=chromosome | SO=protein_coding_gene | is_pseudo=false	MRFSVVSAPMATPSTATGSPPVSSPCSSSVQRRGLSLGKRATIPSFLASGRRPAGLSSVLSSPIRAAAAISVAAAFASQVPSLTALLSSISCSSPAPNPLAFTCLPPPACPLPAQKGPLSTPAAPSTPREAPRSPLSASAWASPAFSASSQSPCYSAFAVPSTANAWEGRLFSVMPAAALSSGSRGASAAQAEGAGSLTTLAAPAHPAFVVTSQDTVPELHLAVTEYVHRKTGAHVVSLTVPSTEKEKVFCIAFRTPVVDSTGVPHILEHSVLSGSAKYPVKEPFAELLKGSLYSYLNASTYPDRTLYPVASANDEDFYNLANVYFDAVFQPRAVRDPDVLLQEGWRLEVTSEDEKEAADAVRLRGEDEAPRPRERRRKLAYQGVVLNEMKGVYSSPEA…	0	165.32	32	41	89	41	1306	142.6	6.81	207.76	41	1.007	1.021	1.014	1.008	1.016	1.03	1.022	1.023	1.01	1.027	0.01	0.03	0.02	0.01	0.02	0.04	0.03	0.03	0.01	0.04	0.867991	0.714054	0.683581	0.301397	0.703404	0.593834	0.490398	0.617114	0.806178	0.437195	0.996674	0.995152	0.980327
FALSE	High	Master Protein	TGGT1_263180-t26_1-p1	transcript=TGGT1_263180-t26_1 | gene=TGGT1_263180 | organism=Toxoplasma_gondii_GT1 | gene_product=Myosin motor domain-containing protein [Source:UniProtKB/TrEMBL;Acc:A0A125YIS7] | transcript_product=myosin D | location=TGGT1_chrVIIb:714013-721737(-) | protein_length=822 | sequence_SO=chromosome | SO=protein_coding_gene | is_pseudo=false	MAAKPEQDCKTAAALIRAGSLIEGVESAGKDFLVWTTQGPAVKKDPDLLFSLCRVLPGSTQQTLKLQQVEPTADSQELTVQAKEVWQANPGIDPLTYGDIGGLPHTNEPCVLDFLARRYQSKVIYTTAEPLIVAVNPFQDLKNAGPDTIALYRDAPDVDKLPPHVFYASRRAMTNMHQLKKPQTIIVSGESGAGKTETTKMLMKYLATSAGGNLDLKIQTAIMAANPVLEAFGNAKTVRNNNSSRFGRFMLLDVAREGGIQHGKVVAFLLEKSRIVCQDKDERSYHIFYQFLKGAPGHMRQRYMLQPLEAYTFINPHCLDAPGIVDTEDFEQTVKSLESMNMTETETCTIWSIVSGVLLMGNAKPTGKTEAGVENAACFVGESEAALRNACSLLFLDYP…	0	164.483	45	37	81	37	822	91	8.34	210.1	37	1.006	0.991	1.002	0.98	0.986	0.972	0.982	0.993	0.987	0.985	0.01	-0.01	0	-0.03	-0.02	-0.04	-0.03	-0.01	-0.02	-0.02	0.546793	0.617515	0.828198	0.142397	0.0813374	0.172071	0.148241	0.77546	0.301151	0.174463	0.996674	0.990049	0.984106
FALSE	High	Master Protein	TGGT1_205440-t26_1-p1	transcript=TGGT1_205440-t26_1 | gene=TGGT1_205440 | organism=Toxoplasma_gondii_GT1 | gene_product=T-complex protein 1 subunit gamma [Source:UniProtKB/TrEMBL;Acc:A0A125YIY0] | transcript_product=CCT chaperonin gamma subunit | location=TGGT1_chrVIIa:1309659-1315491(+) | protein_length=556 | sequence_SO=chromosome | SO=protein_coding_gene | is_pseudo=false	MIRPQGPVLVLKQNTKREQGRKAQLANIQASKAIADIVRTTLGPSSMLKMLLDPLGGIVLTNDGNAILREVDVLHPAAKTMIELSRTQDEEVGDGSTSVVVLAGEVLAGAVDLLEKQQLHPSVISHGYVLALEDTLKYMNEIAIDVDVSDDAKLRQVVDACLNTKFSSRWEGRISQMAIDAVRKVEIKLPNGKKEIDIKRYAKVEKIPGGDLEESRVLDGVMVNKDVTHAKMRRYIANPKVLLLDCPLEYKKGESQTYVEITKEDEWAKLLEQEEKEVRAMCDDIIASGCNLVITEKGVSDLAQHFLVKAGISCIRRVRKTDNNRIARVTGATIVNRTEEITKEDVGTKCGLFEVKKIGDEYFTFLTQCKEKGACTVLLRGGSKDVLNEVERNLQDAMN…	0	162.591	57	30	74	30	556	60.7	5.94	173.38	30	0.988	0.962	0.972	1.035	1.023	0.996	1.006	1.024	1.021	1.036	-0.02	-0.06	-0.04	0.05	0.03	-0.01	0.01	0.03	0.03	0.05	0.00808718	0.173535	0.303128	0.132982	0.19516	0.448011	0.83739	0.724849	0.544312	0.278283	0.996674	0.989773	0.971021
FALSE	High	Master Protein	TGGT1_226660-t26_1-p1	transcript=TGGT1_226660-t26_1 | gene=TGGT1_226660 | organism=Toxoplasma_gondii_GT1 | gene_product=hypothetical protein | transcript_product=hypothetical protein | location=TGGT1_chrX:1361506-1380909(+) | protein_length=3736 | sequence_SO=chromosome | SO=protein_coding_gene | is_pseudo=false	MLQPHPRSTKAQNAAPGLAGSLSSGSLGLAGAAGLSSTSVPFLPPPSRHNGVSHAAAASQALAPSAASSTASLSSQAHSALRGVAAPAAAAGLPGSGAFLPAYASPLYAGQHAGPVAAAKGSRHLLHAHAVGAAGVGGPLTGSAPLQGAVGPSSASPVVHPVLELLQLQNAQVAESRRAVGRPALDPVPVVLGFHHLVHSPEEAAVEVGLVDVVEFPRSPVVLRHVLFLGLGERIHPNVDFEGQSDPAPADCELKVFARVLPPLSEYTATQQKSHANYRPLHANERLAAEAEARVGEGARPVQWRVFELESPETGSPEGEEDLAVDQLVVCGRYRALSVVFFGHVHSTSSKASFFADLSSRPGRAPASPSFVDLAPVSCESVASSCALFSSFSSSPTPT…	0	161.438	15	40	53	40	3736	389.6	5.53	130.92	40	1.006	1.009	1.013	0.995	1.001	1.004	1.008	0.975	1.014	1.013	0.01	0.01	0.02	-0.01	0	0.01	0.01	-0.04	0.02	0.02	0.571059	0.793441	0.844013	0.93185	0.986852	0.857823	0.463341	0.439867	0.200761	0.0152885	0.996674	0.995152	0.984106
FALSE	High	Master Protein	TGGT1_206510-t26_1-p1	transcript=TGGT1_206510-t26_1 | gene=TGGT1_206510 | organism=Toxoplasma_gondii_GT1 | gene_product=Toxolysin TLN4 [Source:UniProtKB/TrEMBL;Acc:S7UUS1] | transcript_product=toxolysin TLN4 | location=TGGT1_chrVIIa:879451-893239(+) | protein_length=2435 | sequence_SO=chromosome | SO=protein_coding_gene | is_pseudo=false	MRRPCLFRSTFLLLLALLPLFSLLSESISPSSRSLPSHQTRALHADLDAARKPASFLSRSEPALSLSSSRETEEDPGRAANASARLPELEAALQEELQAAAVREIASGFSASSTRTLSSSVSSPSHAESVAEAETRPDSSSDPVNDGDSTSGGETPDPLPTLAEVRAALASTVAQSRTFPRRLAAKNGEQVEDGDEELAERKRVRKPPRDTSAYSVFSVPALKLEGVAIADQEEAVGSFAVSVGCGFFHDPPAIPGVAHQLEHLIFLGAEGEEAATSWDEFVSQRGGTHNAHTTAELTTFFVAAPTDTLPELLDRFLLHLFHPLLAAEQFASEVMAVQFEHEKNQPDVARVLLELAMAVTPSLASPASSATQDEVPTSFYRPEVARKFGTGDFDTLCKT…	0	161.431	13	27	60	27	2435	256.7	5.43	162.24	27	0.999	0.992	0.991	1.071	1.07	1.063	1.061	1.029	1.019	1	0	-0.01	-0.01	0.1	0.1	0.09	0.09	0.04	0.03	0	0.966607	0.761224	0.831197	0.428166	0.312126	0.565054	0.61779	0.178594	0.329721	0.98009	0.999123	0.995152	0.984106
FALSE	High	Master Protein	TGGT1_308810B-t26_1-p1	transcript=TGGT1_308810B-t26_1 | gene=TGGT1_308810B | organism=Toxoplasma_gondii_GT1 | gene_product=Rhoptry neck protein RON9 [Source:UniProtKB/TrEMBL;Acc:S7US41] | transcript_product=rhoptry neck protein RON9 | location=TGGT1_chrXI:240636-248425(+) | protein_length=1086 | sequence_SO=chromosome | SO=protein_coding_gene | is_pseudo=false	ASSEKLSCPRACLIASKSGGKTGTDGHEKTNEVRPDQKGGEGASTTQHEEGQETEQGSEEANSSSSSAPAQSHETPVAEHAPCPHAEEHNATNGSNSAEAASEDSNPHEAVKHTDAHGQTQASDKAQGHDQEEASQSSETPAEENAEEPKQAEEQANASQSSETPAEENAQEPKQAEDQANASQSSETPAEENAEEPKQAEEQANASQSSETPAEENAQEPKQAEDQANASQSSETPAEENAEEPKQAEEQANASQSSETPAEENAQEPKQAEEQANASQSSETPAEENAQEPKQTEEQANASQSSETPAEENAQEPKQAEEQANASQSSETPAEENAEEPKQAEDQANASQSSETPAEENAEEPKQAEEQANASQSSATPAEENAQEPKQAEEQANAS…	0	161.173	39	22	44	17	1086	115.1	4.44	140.11	22	1.019	1.038	1.05	0.937	0.955	0.973	0.984	0.953	0.972	0.948	0.03	0.05	0.07	-0.09	-0.07	-0.04	-0.02	-0.07	-0.04	-0.08	0.745702	0.134618	0.17572	0.565629	0.416878	0.806617	0.891952	0.633456	0.810435	0.621905	0.996674	0.989773	0.971021
FALSE	High	Master Protein	TGGT1_297745-t26_1-p1	transcript=TGGT1_297745-t26_1 | gene=TGGT1_297745 | organism=Toxoplasma_gondii_GT1 | gene_product=hypothetical protein | transcript_product=hypothetical protein | location=TGGT1_chrII:1939393-1956115(-) | protein_length=3869 | sequence_SO=chromosome | SO=protein_coding_gene | is_pseudo=false	MRAFAASRRRTVQLDSVGRHEAPLAMPGFDAVSSSAFSSAVTCALSPGFPSTSLHPSSLRPQSLFCGPSSGASAVRSALLSKFSLSRLLLFLLLALLLLAVHPEKPAPGRLPGVAAAAAPSEQPQLKIGPAQVLLPSPAQAAGRLASASVSVRTLLIVENGSSLAAAPCFFWSVQHPDLIRVLHPDCAPSQPASACLLPSTSLSASGAGVCLPRVLVEASHHTPHKRGRSWIFASPGRPASSPGRQVSPSALRVQAVVAPIARIAFRTRDRRLAVGQLGDVGVLAFDEEGNIFTSLQGLVFIWKFEGERGVLQAEDITSDAEAASATRQWVERSSQSASGVHTPDSAAGPFWRSDMLLVRGLKTGKATISVRLAGDEHRHVGEARVSFVVHEPVLLLPA…	0	160.825	12	42	68	42	3869	413.4	6.65	135.9	42	1.038	1.035	1.032	0.973	1.01	1.007	1.004	1.015	1.003	0.971	0.05	0.05	0.05	-0.04	0.01	0.01	0.01	0.02	0	-0.04	0.46805	0.61512	0.667528	0.457065	0.496396	0.833792	0.916939	0.71154	0.896346	0.093455	0.996674	0.990049	0.979747
FALSE	High	Master Protein	TGGT1_300260-t26_1-p1	transcript=TGGT1_300260-t26_1 | gene=TGGT1_300260 | organism=Toxoplasma_gondii_GT1 | gene_product=AA_TRNA_LIGASE_II domain-containing protein [Source:UniProtKB/TrEMBL;Acc:A0A125YPX4] | transcript_product=threonyl-tRNA synthetase family protein | location=TGGT1_chrXII:83727-88302(+) | protein_length=844 | sequence_SO=chromosome | SO=protein_coding_gene | is_pseudo=false	MSFSLLVSCLRSPPFRPRFLWGSPRACRRVPEARSPSRLLFSAQRRLPFSPRGPRFSTMASGRRAEKGTVAALATEEKIGDPHFQVSENSPFLQKRLQVFEDLYEKQTRRLKEKPRREISIELPDGSKKSGTAFETSPYDVALQISKGLAEASLVAKVLYEQPSAESEAITAADDEEEEEAECPCGEHAEESPAEKWILYDMKRPLEGSCRLQLLKFDSDEAKHVFWHSSAHILGQAIEATFGAQLTVGPALTNGFYYDAYMGDAKVTEESYGRLEAAAAAVIKEDQAFRRLVCSKAEALELFADNPFKVQLIASKIPEHGLTTVYCCGSLVDLCRGPHIPSTGKVKAFQVTKHSASYWLGRQHLDSLQRVYGVSFPDKKLLKDYLKLLEEAKKRDHRV…	0	160.669	40	32	71	32	844	95.8	7.49	211.09	32	0.997	1.011	1.013	0.988	0.985	0.999	1.001	0.995	0.986	0.998	0	0.02	0.02	-0.02	-0.02	0	0	-0.01	-0.02	0	0.924722	0.0995097	0.175695	0.192089	0.682215	0.865466	0.925529	0.823569	0.0507344	0.816261	0.996674	0.989773	0.971021
FALSE	High	Master Protein	TGGT1_217460-t26_1-p1	transcript=TGGT1_217460-t26_1 | gene=TGGT1_217460 | organism=Toxoplasma_gondii_GT1 | gene_product=Glutaminyl-tRNA synthetase (GlnRS) [Source:UniProtKB/TrEMBL;Acc:S7V1H6] | transcript_product=glutaminyl-tRNA synthetase (GlnRS) | location=TGGT1_chrXII:1787579-1795013(-) | protein_length=860 | sequence_SO=chromosome | SO=protein_coding_gene | is_pseudo=false	MALSPGAVLRITRLASLPPLSTVTDVVLAYIEQNLKSAGDFTFSVQPDTSSTPAAPFRIAVETKKGEQPSPIAAGEALSDYAAARCIARLAASTGDPFASLLKASGAPGGVEAAVDVCEQWAAFYGVSGKAPEASDNPGLSACIDFFARRFSTSSSFLFGTPQPSLADMTLFALLKAHPAAQTALSSALRTSETAAKHFSSWSACVAKAIPGAGALSGAGAKGTDRAKGKSGEMVGQGAGVASEAVDGPDATTSVNFLKQIVEEDLRTGKHKTVVTRFPPEPNGFLHLGHAKSVCLNFGLAKAFGGRCHLRFDDTNPMKEETRYIESIQRDVRWLGGDWGNHLYYASDYFQQLYDWAELLIKKGLAFVDDDSLEEIRRKRGSISQPGENSPFRERSIEE…	0	160.039	40	28	69	28	860	95.4	7.39	185.87	28	0.984	0.982	0.996	1.007	0.991	0.989	1.003	1.003	1.005	1.007	-0.02	-0.03	-0.01	0.01	-0.01	-0.02	0	0.01	0.01	0.01	0.718552	0.562116	0.646344	0.717675	0.719271	0.357791	0.780354	0.653913	0.726207	0.468564	0.996674	0.990049	0.975418
FALSE	High	Master Protein	TGGT1_256760-t26_1-p1	transcript=TGGT1_256760-t26_1 | gene=TGGT1_256760 | organism=Toxoplasma_gondii_GT1 | gene_product=Pyruvate kinase [Source:UniProtKB/TrEMBL;Acc:A0A125YPV3] | transcript_product=pyruvate kinase PyK1 | location=TGGT1_chrVIIb:4413512-4417055(-) | protein_length=531 | sequence_SO=chromosome | SO=protein_coding_gene | is_pseudo=false	MASKQPQTLSAGAVESGRVARLVSASSVMTQQLGKSTNIRMSQILEPRSEEDWTAHRTRIVCTMGPACWNVDTLVKMIDAGMNVCRLNFSHGDHETHARTVQNIQEAMKQRPEARLAILLDTKGPEIRTGFLKDHKPITLQQGATLKIVTDYNLIGDETTIACSYGALPQSVKPGNTILIADGSLSVKVVEVGSDYVITQAQNTATIGERKNMNLPNVKVQLPVIGEKDKHDILNFGIPMGCNFIAASFVQSADDVRYIRGLLGPRGRHIRIIPKIENVEGLVNFDEILAEADGIMIARGDLGMEIPPEKVFLAQKMMIAKCNVVGKPVITATQMLESMIKNPRPTRAEAADVANAVLDGTDCVMLSGETANGEFPVITVETMARICYEAETCVDYPAL…	0	158.601	52	20	105	20	531	57.5	6.4	290.3	20	0.975	0.961	0.97	1.01	0.985	0.971	0.979	0.99	0.99	1.008	-0.04	-0.06	-0.04	0.01	-0.02	-0.04	-0.03	-0.01	-0.01	0.01	0.228304	0.466844	0.254867	0.702864	0.692443	0.310764	0.205723	0.760811	0.582133	0.697679	0.996674	0.990049	0.971021
FALSE	High	Master Protein	TGGT1_208370-t26_1-p1	transcript=TGGT1_208370-t26_1 | gene=TGGT1_208370 | organism=Toxoplasma_gondii_GT1 | gene_product=Putative myosin heavy chain [Source:UniProtKB/TrEMBL;Acc:S7UJT6] | transcript_product=putative myosin heavy chain | location=TGGT1_chrIb:652389-657163(+) | protein_length=1124 | sequence_SO=chromosome | SO=protein_coding_gene | is_pseudo=false	MRNRRRGLLIFGIVTAMLWLFIDVTTTESAGVQPLTAEAASPGGIPESRPLRYPFPATASKLNRNATYRVRGKTCAYTYRSNDGSFNFTPVPEGGLLNVASLENVEVLNDPLAQAIEDANVVGELVERAKNRRSDVGGDVDEFVLRAETLATELKQALVTRDLARVEQTEEAFRKDFDALREVHSSIQNVQGEMQTALDRGKELLVHLEGIAKNLRDNALLNKVLRMYSTQLQNEMAASVRERASTEAFIAQSNETMKRLQKEYREGMENLEKHKQILQQVDDVGKQLLGIGSVRKVMHAALKTAQEIKTQSAAAEQDADRGLVRVEALSYACNRSETEIRNEMSKLLKVETELLKAVEEMEHRLKGGPRSKTSEAARLALEEMRNRIQRSAHSVEDLG…	0	157.98	32	37	64	37	1124	124.7	6.29	168.26	37	1.004	0.985	1.004	1.004	1.008	0.988	1.007	0.975	0.969	1.005	0.01	-0.02	0.01	0.01	0.01	-0.02	0.01	-0.04	-0.05	0.01	0.876559	0.21079	0.769641	0.847825	0.484146	0.432788	0.378771	0.427841	0.402393	0.839056	0.996674	0.989773	0.984106
FALSE	High	Master Protein	TGGT1_273870-t26_1-p1	transcript=TGGT1_273870-t26_1 | gene=TGGT1_273870 | organism=Toxoplasma_gondii_GT1 | gene_product=SWI2/SNF2 ISWI-like (AT hook) [Source:UniProtKB/TrEMBL;Acc:S7V4B2] | transcript_product=SWI2/SNF2 ISWI-like (AT hook) | location=TGGT1_chrVIII:3198884-3213308(+) | protein_length=1556 | sequence_SO=chromosome | SO=protein_coding_gene | is_pseudo=false	MNTATESSSPPEGEKEKGAASVDMSVAANKPGSVESELSSDRRINVDDLSPGNKPTGDGQETPEAEEEEEDEEEEKEDEEEEGLREGEDETHTFTQAERHSGEYGLANAELEAKLRELLRQADTFSSRIHGGGNAAAPPKKGPGSRGRERRMLSEAEEDDILLRRLEEDSGEGAEGDASRQGDLFVRITEQPSCIEGKMKHYQIEGLNWLYQLHCLDINGILADEMGLGKTLQTISILAFLQFEKNIPGPHLVICPRSTLDNWFNEVKKWCPRFRPARLHGTKEERQELYESVLDPGLFDICITTYEMVIKDYHRLASRFQWNYLIMDEAHRIKNEKSVLSEVVRRFRPRRRLLITGTPLQNNLRELWALLNFIMPQLFDVTLDFAALFDFSRLNTEQQ…	0	157.895	30	39	65	39	1556	175.1	5.27	146.18	39	0.995	0.988	0.983	0.983	0.978	0.971	0.966	0.978	0.988	0.965	-0.01	-0.02	-0.02	-0.03	-0.03	-0.04	-0.05	-0.03	-0.02	-0.05	0.920125	0.578737	0.584625	0.0483125	0.679263	0.285694	0.348555	0.523649	0.658281	0.244536	0.996674	0.990049	0.975418
FALSE	High	Master Protein	TGGT1_219310-t26_1-p1	transcript=TGGT1_219310-t26_1 | gene=TGGT1_219310 | organism=Toxoplasma_gondii_GT1 | gene_product=DnaK family protein [Source:UniProtKB/TrEMBL;Acc:S7V1R0] | transcript_product=DnaK family protein | location=TGGT1_chrXII:915528-922343(+) | protein_length=818 | sequence_SO=chromosome | SO=protein_coding_gene | is_pseudo=false	MAVIGIDLGSLNSVMATVQRGTVSVVTTELSDRVTPSLVGFTEDRRLMGDHALAQMKSNAKNTCRYFKNILGEVFDASNSHLKKEMELSLNNMAAVSPNNVMGYRVQYRGKEVEFSAERVAAAFLTKLRQVAESSLQKPVSEVVIACPPWCRDANRSALLDAAQIAGLKCLRIISDMAATCLDYGMYRRQHFAADRPHIVAFVGVGHSSTSACIAAFWADRLRILAEVSDCELGGRDMDYEIMKHFASAFEKKTKMNPLSSLKARLKLEDQANKAKKILSANSETSFHVECLMEDEDCSGLLTREVFEELCSKTLVPRMETLLQSLLTKSGLKKEDLFSVEIVGGGTRIPWVQKCISNAFGLELSRTLAADETVARGCALQAAMASASFKVKEYGFGER…	0	157.835	39	29	80	29	818	90.1	5.35	195.1	29	1.025	1.005	1.011	0.997	1.021	1.002	1.008	0.995	1.003	0.991	0.04	0.01	0.02	0	0.03	0	0.01	-0.01	0	-0.01	0.0534072	0.609679	0.745013	0.866265	0.374919	0.891254	0.59034	0.872057	0.196645	0.690183	0.996674	0.990049	0.980657
FALSE	High	Master Protein	TGGT1_311400-t26_1-p1	transcript=TGGT1_311400-t26_1 | gene=TGGT1_311400 | organism=Toxoplasma_gondii_GT1 | gene_product=WD domain, G-beta repeat-containing protein [Source:UniProtKB/TrEMBL;Acc:S7UT11] | transcript_product=WD domain, G-beta repeat-containing protein | location=TGGT1_chrXI:2010353-2023624(-) | protein_length=1585 | sequence_SO=chromosome | SO=protein_coding_gene | is_pseudo=false	MALKEVCRSACIAWGPPTRGPAHTKCAASQEEKSTSSGSSLQSHQLYLALGTMGLDPHLELATVDFASSSTALPVVASVSASSPFQCIAWGSSGQNKLAGVAGEHGNGVGVGERALGLLAGGMADGDVTLWDAEAILRSGSPSGSELSSFGSANGTGEASGSAKGLLASVPVHRNQRVHCIHFNPSRPSLLAAGGSSGSVSILDVENVYDVAVYEPGGEGQGSNSGASGDECTSLAWNRVVPHVLATAFSSGTTSVWDLKQRKTAVSFCDPTHRQSRPSSVVWLPNQATQLLLAYDDDRHPVLQLWDLRNSSYPLRETASDGVYGHTRGIVNAALNPMDSRMLLTSGRDNRIVCWWLEEDAFHTQGGQSHPSSGFSVYMQQQTQEPYVQLQWAPSSTPG…	0	157.465	22	31	69	31	1585	165.5	6.6	174.28	31	1.004	1.006	1.002	1.003	1.006	1.009	1.005	1.004	0.997	0.996	0.01	0.01	0	0	0.01	0.01	0.01	0.01	0	-0.01	0.908274	0.435635	0.554043	0.881876	0.664762	0.487467	0.82453	0.0963237	0.572339	0.329768	0.996674	0.990049	0.973444
FALSE	High	Master Protein	TGGT1_243800-t26_1-p1	transcript=TGGT1_243800-t26_1 | gene=TGGT1_243800 | organism=Toxoplasma_gondii_GT1 | gene_product=AMP-binding domain-containing protein [Source:UniProtKB/TrEMBL;Acc:S7VU20] | transcript_product=putative long-chain fatty acid CoA ligase | location=TGGT1_chrVI:2778396-2788707(-) | protein_length=758 | sequence_SO=chromosome | SO=protein_coding_gene | is_pseudo=false	MGNTQSGPQIVYNVPIEDPVPAGKKRTSIYRSVFSPDAIVDNFADRPCQSAWDLFQRGVAISGEKRCLGTRVKNADGTLGPYQWKTYREVEQLALEVGSGILSLPDAAPKLHFEEETFQQDMRFLAFYSKNREEWAICEQACNAYGITIVPLYDTLGPESTAFILAQTRLRSVVASEECARRLLDSIEAAKSSLAGEPEEAVNASRVTPETSEDAAEQTTEGAGKEEATETAGREEGKKAVAELQAGESKAEKEEIFVKYLFLMDDPGAPAKDLLDQATKLGIQVFTWRHLLEKGKENLIPLTDDVVAKLSTVSTVCYTSGTTSRPKGVLMSHGNFVATIAGAVRGPLTVPSMALHPEDTYLSYLPLAHVYERSLQNILFSLGGSVGFYGGNTLKLLDD…	0	156.924	38	23	59	23	758	83.5	5.52	192.5	23	0.989	0.994	0.997	0.99	0.979	0.984	0.987	0.988	0.989	0.989	-0.02	-0.01	0	-0.01	-0.03	-0.02	-0.02	-0.02	-0.02	-0.02	0.433457	0.734172	0.028119	0.645254	0.556679	0.116866	0.560949	0.0897582	0.620047	0.538574	0.996674	0.995152	0.971021
FALSE	High	Master Protein	TGGT1_289690-t26_1-p1	transcript=TGGT1_289690-t26_1 | gene=TGGT1_289690 | organism=Toxoplasma_gondii_GT1 | gene_product=Glyceraldehyde-3-phosphate dehydrogenase [Source:UniProtKB/TrEMBL;Acc:S7UQ54] | transcript_product=glyceraldehyde-3-phosphate dehydrogenase GAPDH1 | location=TGGT1_chrIX:3189155-3191218(-) | protein_length=489 | sequence_SO=chromosome | SO=protein_coding_gene | is_pseudo=false	MALLTTVRDSCFYFPQKTASRHVFLACVTALLQRSDPTFFCEQSTSMQPEADSAWQPDAGTVSLLTRVKDLRVAIAPVLWKSAEAHEHRHHPSACCGPVERNLLQYTARPAPPPFPDLAPSLLWPRARLRTKKIAGRSYTTPDCRHFAKMVCKLGINGFGRIGRLVFRAAMERGDVEVLAINDPFMSLDYMVYLLRYDSVHGHYPGEVSHKDGKLIVGGKAVTVFNEKEPTAIPWGQAGVHYICESTGIFLTKEKAQAHLTNGAKKVIMSAPPKDDTPMFVMGVNNDQYKSSDVIVSNASCTTNCLAPLAKIVHDKFGIVEGLMTTVHAMTANQLTVDGPSKGGKDWRAGRSAGVNIIPASTGAAKAVGKIIPSLNGKLTGMAFRVPVPDVSVVDLTCK…	0	155.736	43	18	118	17	489	53.3	8.31	293.46	18	1.003	1.018	1.022	0.966	0.969	0.984	0.988	0.981	0.96	0.945	0	0.03	0.03	-0.05	-0.04	-0.02	-0.02	-0.03	-0.06	-0.08	0.719346	0.0843174	0.407768	0.0201263	0.114628	0.129884	0.568017	0.299899	0.129625	0.132159	0.996674	0.989773	0.973153
FALSE	High	Master Protein	TGGT1_238050-t26_1-p1	transcript=TGGT1_238050-t26_1 | gene=TGGT1_238050 | organism=Toxoplasma_gondii_GT1 | gene_product=Nuclease and tudor domain-containing protein [Source:UniProtKB/TrEMBL;Acc:S7URW3] | transcript_product=nuclease and tudor domain-containing protein | location=TGGT1_chrVI:31087-39926(+) | protein_length=1024 | sequence_SO=chromosome | SO=protein_coding_gene | is_pseudo=false	MASGIATVKEVVSGDTFVLVGAPKGGPPPEKRLSLASVQAPRVAMKSLSHEVQDEPFGWTAREFMRSRLIGQQVEFKVEYAMNNKEFGTIKLRGENVACALLKQGLAKLKPNRNPPCAPDIEGKNQERREAERDARRREAERDARRERSRARREEGEKQSETRGGRKAGRRGEDGEERKEGKREKEERRGRECEKHREELPERRRELEQCQDLAEQRQLGVWATDPAAGSGTIREMKWAMNDVEFVKAFVAEHKGKKLPGIVEYVRDGGCMRVALLLPQKENESLKVVYLPVLLSGIQCDGFKREQQEGSAEYKVVPEPFAVEARFFVEIRLLNRDVEVRIEGCDEYGNVNGTVYHPKGNISILLLQNGLAKIQSGSLGLTECGAQLSQAMREAQQKQL…	0	155.269	34	32	81	32	1024	114.2	8.31	217.53	32	1.01	1.032	1.007	0.995	1.005	1.027	1.002	1.015	1.016	1.012	0.01	0.05	0.01	-0.01	0.01	0.04	0	0.02	0.02	0.02	0.146721	0.247454	0.633612	0.849585	0.869393	0.205054	0.884576	0.68575	0.740856	0.309951	0.996674	0.989773	0.975418
FALSE	High	Master Protein	TGGT1_202370-t26_1-p1	transcript=TGGT1_202370-t26_1 | gene=TGGT1_202370 | organism=Toxoplasma_gondii_GT1 | gene_product=Putative T-complex protein 1, epsilon subunit (TCP-1-epsilon) [Source:UniProtKB/TrEMBL;Acc:A0A125YJE9] | transcript_product=putative T-complex protein 1, epsilon subunit (TCP-1-epsilon) | location=TGGT1_chrVIIa:3284056-3290078(+) | protein_length=536 | sequence_SO=chromosome | SO=protein_coding_gene …	MNIATDEFGNPFIILREQEEKKRLKGIEAHKSNILAACAVADTLRSSLGPKGMDKIIVGPDGQVTVTNDGATILNKMQVEHQCARLLVELSQSQDAEIGDGTTGVVILAGNLLSQAYRLIEKGLHPLRIADGFEKASQLAVERIREVVMKKDVYDADKELLVHAAMTALGSKVVSSHQRHLAEICVQAVLTVADRERNDVNFDLIKVDGKAGGLLEQTMLVNGVVLHKDLSHSQMPSVTKNAKIAILTCPFEPPKPKTKHKLDIKTVEDYKKLQAAEQKYFTDMIQKVKEAGANFVICQWGFDDEANHLLLHENIPAVRWVGGVELELIALATQGRIVPRWEELTEAKLGHAGVVREISSGTMGDKMIVIEECKNSKAVTVVVYGGNQMVVAEAERSMH…	0	154.331	47	22	66	22	536	58.6	5.96	179.18	22	0.973	0.975	0.993	1.017	0.989	0.992	1.01	1.004	1.003	1.002	-0.04	-0.04	-0.01	0.02	-0.02	-0.01	0.01	0.01	0	0	0.119784	0.137509	0.270597	0.389617	0.325332	0.712871	0.625157	0.745667	0.94303	0.946341	0.996674	0.989773	0.971021
FALSE	High	Master Protein	TGGT1_278660-t26_1-p1	transcript=TGGT1_278660-t26_1 | gene=TGGT1_278660 | organism=Toxoplasma_gondii_GT1 | gene_product=Cation_ATPase_N domain-containing protein [Source:UniProtKB/TrEMBL;Acc:S7UZZ0] | transcript_product=putative P-type ATPase4 | location=TGGT1_chrXII:5863040-5875230(+) | protein_length=1338 | sequence_SO=chromosome | SO=protein_coding_gene | is_pseudo=false	MAARASADKLSTAGEDPAAPVAQVAPDTSSSADGGPSNGASEPGKVGSQPVAAGAEEKVAGHDGESPRRDSHHLRRFSSKRESTVGGSGTGHSQLGKSISSVSQMHRDEHARLLPASSSMSLAPGMGYENVETEVIDRLSKSHVSLKELVETARQSDPEAFRMAVTLTEQSHPTSGKNRFASLPIEELAKEFGLKDMSTGLTEEQVLENRRRYGPNVLEKDKSEPVWKIFIQQFLSPVVLLLLVAAIASLALQEWVEGAAIFIIVTLNASLATYMEKSASNALAKLASMAAPGCVVVREGKAQTVGAVDVVPGDIVLLSTGNSVAADMRCIESVELKTNEALLTGESEDISKTLRAKDYDTPFATNLCFASTIVTNGSGRGLVFATGMETQVGRIAQQL…	0	154.279	29	32	55	31	1338	144.6	6.18	151.96	32	0.982	0.972	1.003	1.01	0.991	0.982	1.013	1.006	0.996	1.031	-0.03	-0.04	0	0.01	-0.01	-0.03	0.02	0.01	-0.01	0.04	0.235991	0.0531358	0.918926	0.0898543	0.494744	0.0332725	0.709485	0.769135	0.899911	0.369962	0.996674	0.989773	0.992295
FALSE	High	Master Protein	TGGT1_258240-t26_1-p1	transcript=TGGT1_258240-t26_1 | gene=TGGT1_258240 | organism=Toxoplasma_gondii_GT1 | gene_product=Chromodomain helicase DNA binding protein CHD1/SWI2/SNF2 [Source:UniProtKB/TrEMBL;Acc:S7W7H2] | transcript_product=chromodomain helicase DNA binding protein CHD1/SWI2/SNF2 | location=TGGT1_chrVIIb:3435272-3453383(-) | protein_length=2495 | sequence_SO=chromosome | SO=protein_coding_gene | is_pseudo=f…	MEEVPQPGGTPPNPAGSCPRPLESQGTGFGLMSAQAPLPSQGVSTAPQDSPASGGPVRPGGHPSAHLPPHSLQFLHLKQFHNAQHAQNMQNAQNVHHQMLEANRSRGAPLSSHIGGVTGAKPQTATPPQQQQLLLQQRHQLLVQQRVQQDHLRFQQLQQHLLVAGQHAARGQAQAAPSWPAAQPPHGAAAQPAGAGTPGSFGASMVSATGSGPGAPQFPRPLRPAGPPAMTSSEALQTGAPASSSLASVEPEAASRVPGPDDVPGSGTVEEAQRTLPTASAVDSAGGAAPSATPQTAVLPTQTGPAEGRCGVVGFQMGGGNAGEVQVASAMQRQRQLLQHQQLLQFQQQTFAQQNQTAGTSQRAPNGPNGVGPGLGFFGGEAPAAAQPGIQGGAPASVS…	0	154.051	20	38	51	38	2495	271.7	6.55	122.59	38	1.002	1.011	0.989	0.998	1	1.009	0.986	1.029	0.999	0.972	0	0.02	-0.02	0	0	0.01	-0.02	0.04	0	-0.04	0.7685	0.287754	0.765021	0.359811	0.990258	0.433182	0.732679	0.0674659	0.933905	0.247979	0.996674	0.989773	0.983537
FALSE	High	Master Protein	TGGT1_236650-t26_1-p1	transcript=TGGT1_236650-t26_1 | gene=TGGT1_236650 | organism=Toxoplasma_gondii_GT1 | gene_product=DEAD (Asp-Glu-Ala-Asp) box polypeptide 17 [Source:UniProtKB/TrEMBL;Acc:A0A125YWJ5] | transcript_product=DEAD (Asp-Glu-Ala-Asp) box polypeptide 17 | location=TGGT1_chrX:5362273-5365892(-) | protein_length=550 | sequence_SO=chromosome | SO=protein_coding_gene | is_pseudo=false	MYSGYGSSSGGGYSGGSNSSYGYGGGYGGSSYGGDSYGGGGYGGSSYGGGMYGGGRPGGGMGMGGYGADALGSKLQRVDWKTIDLVPFEKNFYVEHPAVANMSAEEAERIRRANEITIVHGHNVPKPVPTFEYTSFPSYILDVINQTGFQKPTAIQVQGWPIALSGRDMIGIAETGSGKTLAFLLPAIVHINAQPYLNKGDGPIVLILAPTRELVEQIRAQCRTFAASSKIHHAVAYGGVPKRPQIMELERGAEICVACPGRLIDFLESRVTNLRRVTYLVMDEADRMLDMGFEPQIRKIVSQIRPDRQTLMWSATWPKEVQNLARDLCKEEPVHINVGSLDLQACQNIKQEVMVVQEYEKRGQLMSLLRRIMDGSKILIFAETKRGADNLTRDMRVEG…	0	154.026	53	25	74	23	550	59.9	8.94	205.95	25	1.003	1.006	1.004	1.013	1.017	1.019	1.017	1.032	1.013	1.016	0	0.01	0.01	0.02	0.02	0.03	0.02	0.05	0.02	0.02	0.874892	0.297056	0.343672	0.502365	0.148155	0.448996	0.36537	0.320287	0.173939	0.344709	0.996674	0.989773	0.971021
FALSE	High	Master Protein	TGGT1_308890-t26_1-p1	transcript=TGGT1_308890-t26_1 | gene=TGGT1_308890 | organism=Toxoplasma_gondii_GT1 | gene_product=Transcription elongation factor SPT6 [Source:UniProtKB/TrEMBL;Acc:S7W102] | transcript_product=transcription elongation factor SPT6 | location=TGGT1_chrXI:296965-314183(+) | protein_length=3132 | sequence_SO=chromosome | SO=protein_coding_gene | is_pseudo=false	MDSPASSSREAEAGGRLRRPPSDEDMPLKVEKKTKKSKKEKKRERASSEKKRKLKARKSSSSRKKKHRFVKDSAREASDEELRRRSTDSSDEESGSDEDAAIAAEMRGFIVSEESGEEEGESDDSEKENEDEGPQQLDDEDLDLIEENTGLTVRKQPLRPPFDEGESEFEEAEEAEGSGARDSEDADGFAALQSEEQRRYRRLKKVESSAPKSADRPESERGGVSRTREEASGSLFFDDDKGENEFGAATFPALEAPASALDADAASDGGEAVAQGGAGSSLPAKKLVGRRMSRTSASPLGQEDRAEASEEDEAWLEEEDALQDSAAQQRMGETWGLVYDCFGDVDAVVRILCNVKPVKHTASGGEEDEFQGAGDVADEPRRRREGRGREDDEELRGRL…	0	153.667	14	34	53	34	3132	349.6	5.74	144.67	34	0.967	1.015	1.007	1.027	0.994	1.042	1.034	1.041	1.014	1.015	-0.05	0.02	0.01	0.04	-0.01	0.06	0.05	0.06	0.02	0.02	0.518826	0.608035	0.616088	0.532653	0.9368	0.562023	0.552554	0.654952	0.794215	0.765082	0.996674	0.990049	0.975418
FALSE	High	Master Protein	TGGT1_273560-t26_1-p1	transcript=TGGT1_273560-t26_1 | gene=TGGT1_273560 | organism=Toxoplasma_gondii_GT1 | gene_product=Kinesin motor domain-containing protein [Source:UniProtKB/TrEMBL;Acc:S7V3F2] | transcript_product=putative kinesin heavy chain | location=TGGT1_chrVIII:3381230-3400326(-) | protein_length=1641 | sequence_SO=chromosome | SO=protein_coding_gene | is_pseudo=false	MDGKGNRDPGALLDATGMDDLAGLDDNKEESIRVCTRMRPLFPKEVEARHVKAWRVERSSLELIVEPPSQLEMEESRQTAAGKAVLGTMKKAAEKSQGQKDIIQRHYVFDRCFDDNTHNSEVFDYVAKDIVLDCFKGINGCVFAYGQTGSGKTHSIMGVADDPGILPRSLAEFFDCVTDPSLLKEEEEELKRQQGDEGDRNGKDDHHDDAETENTEYLMRVSYVEIYLERVNDLLQESAKGGAVENLEVKEDPKRGFVVVGLHEETVATMEEAMSLIAAAEQRRHFARTNFNETSSRSHVVFSITLESTRTFEDGSNISRRGELKIVDLAGNEKAGRASEGVENAKLVMEEGKAINKSLFLLSEVISKLSKQAQQQAEGKLKKGEKEVYIPWRDSKLTR…	0	153.393	24	36	76	36	1641	181.3	6.4	163.42	36	0.987	0.962	0.975	1.026	1.013	0.987	1	1.002	0.999	1.001	-0.02	-0.06	-0.04	0.04	0.02	-0.02	0	0	0	0	0.353899	0.346499	0.546511	0.741458	0.84729	0.771984	0.995861	0.958503	0.961566	0.969912	0.996674	0.990049	0.973444
FALSE	High	Master Protein	TGGT1_237220-t26_1-p1	transcript=TGGT1_237220-t26_1 | gene=TGGT1_237220 | organism=Toxoplasma_gondii_GT1 | gene_product=DNA replication licensing factor MCM7 [Source:UniProtKB/TrEMBL;Acc:S7UQY5] | transcript_product=putative DNA replication licensing factor Mcm7 | location=TGGT1_chrX:5679145-5687290(+) | protein_length=865 | sequence_SO=chromosome | SO=protein_coding_gene | is_pseudo=false	MATQGDAGTLCFTTLQQQQQHWAFLRADEAALQQKATHEVEQYDRHVSLLKNFFLHFVDEFASQGKGENVNATHGDFKYRNLLQAVHDERRDDLPVYLDDVREFFTTQQPEDAPLGEEDLGSAKKAASLTVYEAILTNTSRYIELLYQAADAVLKQEPDLFETGEEVEVEQDQVHFLKATDSQALNNELKLRLRKKDPWRKIRERDMAARRVPAFLRCGFRVCLYPPAREGCRLFRSVDATSMGKFSFFTCEVLRVQQVKPKLLVAAYECEECHEKVFQPVEANAFMPLLTCPLCKNSRNRECTLHLHPKLSFFLPFQEVKVQEPTCQIPEADVPRTLNCHLVGHAVTNILQPGMTVTLGGVLKPVRKMGFAALRSGLVQEKVFEVSFIQLKKQQTHLD…	0	152.892	39	30	71	30	865	96.8	6.93	182.29	30	0.982	0.975	0.985	1.059	1.04	1.032	1.043	1.034	1.027	1.012	-0.03	-0.04	-0.02	0.08	0.06	0.05	0.06	0.05	0.04	0.02	0.550792	0.294745	0.723887	0.336407	0.189132	0.368185	0.00664979	0.426256	0.72011	0.6335	0.996674	0.989773	0.980327
FALSE	High	Master Protein	TGGT1_268950-t26_1-p1	transcript=TGGT1_268950-t26_1 | gene=TGGT1_268950 | organism=Toxoplasma_gondii_GT1 | gene_product=HTH La-type RNA-binding domain-containing protein [Source:UniProtKB/TrEMBL;Acc:S7V5D6] | transcript_product=hypothetical protein | location=TGGT1_chrVIII:6183799-6188591(-) | protein_length=543 | sequence_SO=chromosome | SO=protein_coding_gene | is_pseudo=false	MATPEANAAAAAAPVEQNAVGSADQGKDSQPEMTPEKHEGKNVCNEEKELSRKRKRGGHEDSFFPKKREEMTPEQLKQRIKRQVEYYLSDESLAYDAFFQSKMREAAQQGKGESLDLRFVLSSPRIKSLNLTKAEILAAIADSVAVKVKEEADGTTLLYRETPLPELQERPQRTACARREDGSGGASRLPQGVGRDPHAAGVFLKLCDIPESVQQWQQVKDAIKETLPGEVFVKFVSKIEEVSVSADKKTRRCWVYLGSFEDDRETLQKMQPIKIPLGDGEAEAYILTDQEVRLCVQDLPPRIRTAREKDLQTLRRQLAALPLSLGGIPFKSVEHLRMCMAEFLQKTPVDQALKPNSAAEKAVKGLLDYHPKAYIKKGGRDREVVGIKVGLHDKRDSQS…	0	151.834	54	29	67	29	543	60.2	6.7	157.79	29	1.012	1.02	1.01	0.985	0.997	1.005	0.995	1.029	1.013	1.007	0.02	0.03	0.01	-0.02	0	0.01	-0.01	0.04	0.02	0.01	0.595612	0.64023	0.764393	0.68641	0.843396	0.405523	0.224721	0.0674147	0.569928	0.820623	0.996674	0.990049	0.983537
FALSE	High	Master Protein	P12111	Collagen alpha-3(VI) chain OS=Homo sapiens (Human) OX=9606 GN=COL6A3 PE=1 SV=5	MRKHRHLPLVAVFCLFLSGFPTTHAQQQQADVKNGAAADIIFLVDSSWTIGEEHFQLVREFLYDVVKSLAVGENDFHFALVQFNGNPHTEFLLNTYRTKQEVLSHISNMSYIGGTNQTGKGLEYIMQSHLTKAAGSRAGDGVPQVIVVLTDGHSKDGLALPSAELKSADVNVFAIGVEDADEGALKEIASEPLNMHMFNLENFTSLHDIVGNLVSCVHSSVSPERAGDTETLKDITAQDSADIIFLIDGSNNTGSVNFAVILDFLVNLLEKLPIGTQQIRVGVVQFSDEPRTMFSLDTYSTKAQVLGAVKALGFAGGELANIGLALDFVVENHFTRAGGSRVEEGVPQVLVLISAGPSSDEIRYGVVALKQASVFSFGLGAQAASRAELQHIATDDNLV…	0	151.83	15	44	64	44	3177	343.5	6.68	131.84	44	1.041	1.047	1.047	0.973	1.012	1.018	1.018	1.028	1.069	1.049	0.06	0.07	0.07	-0.04	0.02	0.03	0.03	0.04	0.1	0.07	0.528262	0.388855	0.035748	0.559327	0.44357	0.0577303	0.670119	0.54147	0.0958702	0.172908	0.996674	0.990049	0.971021
FALSE	High	Master Protein	TGGT1_294620-t26_1-p1	transcript=TGGT1_294620-t26_1 | gene=TGGT1_294620 | organism=Toxoplasma_gondii_GT1 | gene_product=Eukaryotic translation initiation factor 3 subunit C [Source:UniProtKB/TrEMBL;Acc:A0A125YXE7] | transcript_product=putative eukaryotic initiation factor-3, subunit 8 | location=TGGT1_chrIa:989669-996523(-) | protein_length=971 | sequence_SO=chromosome | SO=protein_coding_gene | is_pseudo=false	MQSKFWAAASDESEDSGFSSSESEAEQEQQVPAGEARRPVVASRWAAADTSSSDDEGGRVVKSLKDRRWTAMRETIRQMRNHMKIADFSELYKDYESLVRCLQKSQQIVEQEGLPSFFVRIIVELEQFLEERHRDKEAFKKLSKAKATAFNTLRAKVRKTNEQWQEKVDACKADPSQFASSDSDDDDDFDSDDSSDLSDISDSSESEESDEEKPKRKAMNEDGSEDSEDSEWSDSDASSLSSGEETDKHKAAMAKWGLRSEGDKSRKQKEKKKTKRISKTKDEGALSPRGEAGAEFSIKDMESLFDTNDLDASVIRKRVQLVVEKRGRRGVDRLEQTRILKRLAELAARVGPQSELEVLAHLISAEFDTTSGVFACLSSAIWLDVFHQLEAVLGHLEEG…	0	151.603	28	26	79	26	971	109.1	6.32	219.03	26	1.016	0.99	1.001	0.993	1.008	0.983	0.994	0.99	0.995	0.986	0.02	-0.01	0	-0.01	0.01	-0.03	-0.01	-0.01	-0.01	-0.02	0.355288	0.543077	0.937809	0.602935	0.0322704	0.0507682	0.337401	0.299829	0.0890672	0.0944085	0.996674	0.990049	0.992295
FALSE	High	Master Protein	TGGT1_263870-t26_1-p1	transcript=TGGT1_263870-t26_1 | gene=TGGT1_263870 | organism=Toxoplasma_gondii_GT1 | gene_product=GST C-terminal domain-containing protein [Source:UniProtKB/TrEMBL;Acc:S7WDQ1] | transcript_product=glutamate-tRNA ligase | location=TGGT1_chrVIIb:247108-256643(-) | protein_length=828 | sequence_SO=chromosome | SO=protein_coding_gene | is_pseudo=false	MHSRGTPGQKRRGRRHRGVANAENRLFVAVSRHNFSLNSLLTFELGVSVWPEQELLKNPLLVASPTSTLRPARKRRVESLTRCRDTATLLSFVFSVQKTESGSEEVFTDIAAAKLLCTLSSKTRLLYPAAAPAPSFADASETACIDTMLSLATSLQVSSLSPKQLGSLSSHLQLRTFLCGFHLSLADLAVYTQLRRHANNEQQGGAPPQGWKDKFVHVSRWYAFIHGQPQISNVVAVALRKAGANAKGAEASKNEGKKREGRANSSGASSPPSADKRAAAAQASYEGKLEGAVQGKVVTRFPPEPSGYLHIGHAKAALLNSYFAQKYNGKMLFRFDDTNPAKENDEFESSIAEDLRLLNVEWAAISHTSDYFEQMQSLCERLIKEGKFYVDDTPTELMR…	0	151.073	34	27	67	27	828	92.5	8.85	178.83	27	0.971	0.978	0.974	1.016	0.986	0.993	0.989	0.99	1.009	1.005	-0.04	-0.03	-0.04	0.02	-0.02	-0.01	-0.02	-0.01	0.01	0.01	0.357747	0.506929	0.202057	0.0652866	0.558738	0.801622	0.365893	0.0640593	0.535719	0.055303	0.996674	0.990049	0.971021
FALSE	High	Master Protein	TGGT1_289330-t26_1-p1	transcript=TGGT1_289330-t26_1 | gene=TGGT1_289330 | organism=Toxoplasma_gondii_GT1 | gene_product=USP domain-containing protein [Source:UniProtKB/TrEMBL;Acc:S7UQR8] | transcript_product=ubiquitin carboxyl-terminal hydrolase family 2 protein | location=TGGT1_chrIX:3004463-3016618(+) | protein_length=2291 | sequence_SO=chromosome | SO=protein_coding_gene | is_pseudo=false	MSRRERKGANELNKSDPNCVPPSLLDSQLALLAANSFDVPLTLKKSTASLSASRSSSPRSVVSANCSSPRTSDFPDRDPLASSVDLPRASPASPASPASVSPRSLGSRSPVSSSFAGNLREREGVCLRGALHLSPSCGAALGSLSPPPLLRTSRSACLSPSVSTDPPRASPLGVSFLSSTMEEDDAALFKVEKGSSRLAAKAPEAGATAGELGVCTPVPGVTPEPSGGVSPPAPKAFGLASSTPRRLNDGSLLEAPLSNELEMVIPRFRARFLEGLEEGDAPVDSLTLYSDWKELPALRFRLMVHPLTRSHSRLAQLSPPSPLLPEARALSPQQQEFLQSRTAAAFVEIGPKPDWPADWSFQAGVRFHIYVVNLSEPERSIWKEETFQFSCEEVDRGWH…	0	150.664	17	34	58	34	2291	247.6	6.01	135.03	34	1.005	1.001	1.03	0.988	0.993	0.989	1.017	1.005	0.994	1.001	0.01	0	0.04	-0.02	-0.01	-0.02	0.02	0.01	-0.01	0	0.858792	0.976781	0.409905	0.596985	0.446808	0.365157	0.198035	0.872863	0.823824	0.973772	0.996674	0.998909	0.973444
FALSE	High	Master Protein	TGGT1_269885A-t26_1-p1	transcript=TGGT1_269885A-t26_1 | gene=TGGT1_269885A | organism=Toxoplasma_gondii_GT1 | gene_product=Rhoptry metalloprotease toxolysin TLN1 [Source:UniProtKB/TrEMBL;Acc:S7V3X7] | transcript_product=rhoptry metalloprotease toxolysin TLN1 | location=TGGT1_chrVIII:5561686-5568242(+) | protein_length=1291 | sequence_SO=chromosome | SO=protein_coding_gene | is_pseudo=false	MKQGTTRPRVGLTGAVLLLVVWTVAILIDCSSGSRVLFDRRPILARLRRATSFVDSTSGQNASPRPTKTDKIRKPRNDSRNYRYIELPNELRALLVSDPECDEAAASMRVGVGSMSDPPKIPGLAHFTEHMLFQGSKRFPGTHDFFDFVHNHGGYTNAFTSKFSTVFSFSIGPGFLEPGLDRLADLFSAPLLKSENLLKEVNAVHSEYIIDLTDDGRRKHHLIRQTAKGGPFSNFTVGNLESLMERTKQQGIDPVKAMREFHNKWYSSNLMTLAVVGRESLDVLESHVRKHFGNVPNGRVTPPVFEECSEAFIPLDPNELGTETLVVPEADLHDATFVFYLPPQAKNWRSKPLQFISEMLEHEGPTSLSSKLKREGLITSLVTDYWSPELCTVLQVNVR…	0	150.578	31	30	67	24	1291	142.2	6.92	192.81	30	0.983	0.966	0.976	1.02	1.003	0.985	0.995	1.01	1.007	1.011	-0.02	-0.05	-0.03	0.03	0	-0.02	-0.01	0.01	0.01	0.02	0.725346	0.21341	0.609589	0.566306	0.872503	0.429466	0.726289	0.432105	0.831416	0.360652	0.996674	0.989773	0.975418
FALSE	High	Master Protein	TGGT1_209210-t26_1-p1	transcript=TGGT1_209210-t26_1 | gene=TGGT1_209210 | organism=Toxoplasma_gondii_GT1 | gene_product=hypothetical protein | transcript_product=hypothetical protein | location=TGGT1_chrIb:1139917-1148599(+) | protein_length=1492 | sequence_SO=chromosome | SO=protein_coding_gene | is_pseudo=false	MDLTGEESGSPAELPRERKGGEFAHPDEGPCYDTDEEHNDSSRGAAHSEKGESPETPLAQAAAEEEREERREEEREEEREDGREEEREEEMEERGDARSVQGEEDGVSCSASNADLLRDEGEGGEETMELLEKDTREARKRGREETAREDADIYASCPEALLEEMPDGSKIRSALQRPVLGVLVGDTYFIKVTNEDAAFIIGRGGSTKKKIAGVSGCRVELEDNGLRLDVTGTEEQRERALLYIRLIMQQRLGPVRWNSERNDMCTEGVARLFPLQDEEADAKKAPRKDLTVLEIPSEAVAYVTGSNGQVLRRIEDEWRTLMFFTQQERGAGKGAAAQTAAKRSGRRAEVDEKDAPDAKDAPDAKDAETGAGEHGKDAAPVGGKMEELLIFGSERSRVG…	0	149.002	29	38	60	38	1492	166.8	5.54	120.01	38	0.971	0.997	0.987	1.019	0.989	1.015	1.005	0.997	1.023	0.974	-0.04	0	-0.02	0.03	-0.02	0.02	0.01	0	0.03	-0.04	0.655195	0.828858	0.509872	0.540984	0.758173	0.327928	0.606493	0.891369	0.212803	0.0794666	0.996674	0.995488	0.973444
FALSE	High	Master Protein	TGGT1_230960-t26_1-p1	transcript=TGGT1_230960-t26_1 | gene=TGGT1_230960 | organism=Toxoplasma_gondii_GT1 | gene_product=CPSF_A domain-containing protein [Source:UniProtKB/TrEMBL;Acc:A0A125YIG2] | transcript_product=putative splicing factor 3b, subunit 3 | location=TGGT1_chrVIII:1132596-1143754(-) | protein_length=1233 | sequence_SO=chromosome | SO=protein_coding_gene | is_pseudo=false	MPVLYHLTLQKPTAIVHALQGNFSAPRAQEVVVSRGRVLELLRPDDQGKLQAISSTEVFGIIRSIAAFRLTGANRDYLAIGSDSGRLAIVQFSAEKNEFERVHCETYGKTGIRRVVPGEYLAVDPKGRTLMVAAVERQKFVYIVNRDNKAQLTISSPLEAHKSHAICHDLCGVDMGFDNPLFASLEQNVESSDRKPATPGVTVPKGLCLWEMDLGLNHVIKKATLPVPASAHCLIPVPGGGGADGPSGLLVCCGNFLLYKKPDHEEICCAIPRRLETGSDRGLAVVAFAVHRMKDFFFILIQTEYGDIYKVEISHEEGVVREVVCRYFDTVPVANALCVLKSGYLFVASEFGNHLFYQFTGIGSDASDPRCSSTHPLGREAIIAFKPRPLRNLALVDEL…	0	148.958	24	23	55	23	1233	135.7	6.6	150.13	23	1.026	1.013	1.05	0.975	1.001	0.988	1.024	1.021	1.003	1.009	0.04	0.02	0.07	-0.04	0	-0.02	0.03	0.03	0	0.01	0.519877	0.766814	0.420129	0.433935	0.94708	0.502395	0.405299	0.380072	0.713137	0.580136	0.996674	0.995152	0.973444
FALSE	High	Master Protein	TGGT1_263090-t26_1-p1	transcript=TGGT1_263090-t26_1 | gene=TGGT1_263090 | organism=Toxoplasma_gondii_GT1 | gene_product=14_3_3 domain-containing protein [Source:UniProtKB/TrEMBL;Acc:A0A125YLJ3] | transcript_product=14-3-3 protein | location=TGGT1_chrVIIb:786880-789511(+) | protein_length=323 | sequence_SO=chromosome | SO=protein_coding_gene | is_pseudo=false	MVSTDIAFSSAKKSTRRPLLVFHRPARDFFVFLRFPSFFSGHFPSFPLLLSCVPVSTMAEEIKNLRDEYVYKAKLAEQAERYDEMAEAMKNLVENCLDEQQPKDELSVEERNLLSVAYKNAVGARRASWRIISSVEQKELSKQHMQNKALAAEYRQKVEEELNKICHDILQLLTDKLIPKTSDSESKVFYYKMKGDYYRYISEFSGEEGKKQAADQAQESYQKATETAEAELPSTHPIRLGLALNYSVFFYEILNLPQQACEMAKRAFDDAITEFDNVSEDSYKDSTLIMQLLRDNLTLWTSDLQADQQQQEGGEKPAEQADQ	0	147.818	60	22	121	19	323	37.2	5.14	275.04	22	0.968	0.978	0.883	1.158	1.122	1.133	1.022	1.103	1.287	1.101	-0.05	-0.03	-0.18	0.21	0.17	0.18	0.03	0.14	0.36	0.14	0.182214	0.93351	0.430567	0.474549	0.573879	0.334964	0.644502	0.527316	0.420221	0.273409	0.996674	0.998909	0.973444
FALSE	High	Master Protein	TGGT1_205010-t26_1-p1	transcript=TGGT1_205010-t26_1 | gene=TGGT1_205010 | organism=Toxoplasma_gondii_GT1 | gene_product=SF3b1 domain-containing protein [Source:UniProtKB/TrEMBL;Acc:S7UUF2] | transcript_product=putative U2 small nuclear ribonucleoprotein family protein | location=TGGT1_chrVIIa:1582142-1590578(-) | protein_length=1386 | sequence_SO=chromosome | SO=protein_coding_gene | is_pseudo=false	MENNGSSGKNQPSSTAAATDSAGVAFDSHIYGETPAAHYVTEIDAETPLVAQDGGSGSAVSRASRSGQRSTEDGARIAERERMLMAQQGDGVEATGVDKSIAAREDFYRRQRFQRALSPERADPFSDGDLGAASRGESARTYADVMLEQHLDREKQAAVRQIRKLQEDAELQRQLQMQKQLGGGDGSEKKRRRWDWGTAGAEDEGLTEAERQELARAKAQGGGKSEEGAAAAAAALVSRWDTPLQAGGQTPGAWGETPLVAGSDSREGAGARTGLGAAPGKKKSRWDATPTIGGTGQETPTPGQWGATPAVDQAGTPILAGAGSVTPMAPGAGSGNVTPMIAPGSQTPSMGRKRSRWDATPVLGGSDADMAAAAAAGLTPGASTPMTGGAGMTPGKDGS…	0	147.515	23	29	52	29	1386	150.7	5.95	123.64	29	0.986	0.962	0.989	1.019	1.005	0.98	1.008	0.977	1.002	1.014	-0.02	-0.06	-0.02	0.03	0.01	-0.03	0.01	-0.03	0	0.02	0.301676	0.174759	0.30451	0.640842	0.85948	0.714385	0.859084	0.566666	0.962791	0.70414	0.996674	0.989773	0.971021
FALSE	High	Master Protein	TGGT1_291140-t26_1-p1	transcript=TGGT1_291140-t26_1 | gene=TGGT1_291140 | organism=Toxoplasma_gondii_GT1 | gene_product=CCR4-Not complex component, Not1 protein [Source:UniProtKB/TrEMBL;Acc:S7UQ42] | transcript_product=CCR4-Not complex component, Not1 protein | location=TGGT1_chrIX:3957969-3969206(+) | protein_length=2562 | sequence_SO=chromosome | SO=protein_coding_gene | is_pseudo=false	MGDPGGGDSVFPSLKATGSSATGPSTGTSSHSGAGGSTSGNAVSASATSFAGSSTGTGASLGSGSATNNNSGLGTEHNAQNGEEGTSGKAPMTGSPTAGGVSCSAASAGEADGVSLRGPPAQAASASGNENGAKNGPPGGGAAGAPVSQAQQLLAVAGKPAQDFEAEVNSCFQKMYSGIYSVDMVVALLQRLSQAPPGSRDSSLFVSMIRTLFFECRHFPKYPPHELALTAELFGQLIHRHVLINSGNSLMIALRCVLEAIRKGPTSKMFVFGIAALEQFLDRIFLFPQFLVALASLSELQQQHPHYTHYAQSVLLLIPEKYHSLVVLDPRIAASLPPMPDLPPVVGVAAAARQAAGTGIGEVTQTSEPPSGSSISTMLPPPHGLQHPVTASIQQQLAA…	0	147.172	17	39	59	39	2562	265.7	7.33	137.72	39	1.029	1.037	1.018	0.986	1.015	1.022	1.004	1.001	1.003	0.996	0.04	0.05	0.03	-0.02	0.02	0.03	0.01	0	0	-0.01	0.678918	0.439406	0.494901	0.500532	0.760789	0.396019	0.474503	0.841002	0.841181	0.788444	0.996674	0.990049	0.973444
FALSE	High	Master Protein	TGGT1_217680-t26_1-p1	transcript=TGGT1_217680-t26_1 | gene=TGGT1_217680 | organism=Toxoplasma_gondii_GT1 | gene_product=hypothetical protein | transcript_product=hypothetical protein | location=TGGT1_chrXII:1930956-1942802(-) | protein_length=2213 | sequence_SO=chromosome | SO=protein_coding_gene | is_pseudo=false	MGGKSPPVPEAAGVGRWTDGASFLVCVKSGLFSLRTVLPLVTIFFCLPSETPFCSPALSSFSAGSFSRPDGVYGEPPLALPATLAAVASATSPEHSTTDESETSGGTIEKRGKGAPAPGHSEGRTRGASSSSVPSTQAKQKGNATQQGPPHETPEQDSSLSVAGRGMEISQTSKHSASRTLSRDARLPLPSQLSFHGWLSSALDNSGEQLWGSWNGGSSEMKKGARTARPSAPGKAKPAFPRLISAVSSGLQETSPETHQDSLQQEASSDTSQLLTSLKSGLPQSAAPTGSERDGSFGSVTEPEVDAAEGWELESQAEAVEKVEASLQKRVSKLTGDIDWLQKQLDGVVGDMQMYRSALVDLRPQRSVEAFEQIAAGGRNFPHRTFLEQLENAVNVMDS…	0	147.1	21	40	73	40	2213	242.9	5.39	164.15	40	0.987	0.991	0.962	1.033	1.02	1.024	0.995	0.99	1.02	1.042	-0.02	-0.01	-0.06	0.05	0.03	0.03	-0.01	-0.01	0.03	0.06	0.624461	0.67294	0.140496	0.359533	0.710687	0.636339	0.882991	0.284797	0.436325	0.0797735	0.996674	0.99327	0.971021
FALSE	High	Master Protein	TGGT1_221870-t26_1-p1	transcript=TGGT1_221870-t26_1 | gene=TGGT1_221870 | organism=Toxoplasma_gondii_GT1 | gene_product=hypothetical protein | transcript_product=hypothetical protein | location=TGGT1_chrII:627827-634682(+) | protein_length=1373 | sequence_SO=chromosome | SO=protein_coding_gene | is_pseudo=false	MDTRDGESSPWRREKTRPPAPAASLSCAAFLSLLTGRKNSAVSPSSSSLLASTSSPGVQTHCRAAAFSRRMRWLLVCLVLAHLCSENTQSLRDLSPGASPGKASLSPSLLAAAAGKLDISPPKPQGNPVQMGAPTHPLFGAGKQGKDLPPAVADSPPPPAPPVLPPVSPEASDAAADVQRRVPGSVGESPGGEEQGEAQRDTGHHSGDDTNETAKMEETVSPDPVHNKERRDSGSPETAGEGENVPVSGKSAIEGEHKEEAPSQGLSPESDRASDTHAAGDRNLAPAPPASEKEATDDAVTRHAEKRGVDTPPQTQEGDASQAEESRAEDNKVPAPSGQSERVSDSRRRVQRVAGNGASPSSSNGEAAEGNGSPPAAAVPADARIGRSEQVRPAGAPPH…	0	145.967	28	27	45	27	1373	144	5.91	113.71	27	1.032	1.048	1.004	0.962	0.993	1.009	0.966	0.974	0.974	1.03	0.05	0.07	0.01	-0.06	-0.01	0.01	-0.05	-0.04	-0.04	0.04	0.533975	0.507584	0.943764	0.62569	0.812322	0.508746	0.287363	0.532204	0.402288	0.252711	0.996674	0.990049	0.992295
FALSE	High	Master Protein	TGGT1_272910-t26_1-p1	transcript=TGGT1_272910-t26_1 | gene=TGGT1_272910 | organism=Toxoplasma_gondii_GT1 | gene_product=T-complex protein 1 subunit delta [Source:UniProtKB/TrEMBL;Acc:S7V3B1] | transcript_product=T-complex protein 1 delta subunit | location=TGGT1_chrVIII:3700329-3707666(+) | protein_length=542 | sequence_SO=chromosome | SO=protein_coding_gene | is_pseudo=false	MAAADVATKSGGSKPSAGKHDGMWAHDEKQKDIRRQNIIAAKAVADAVRTSLGPRGMDKMIQGPRGDVLITNDGATILNEMAVVHPVAKMMVELSKAQDVEAGDGTTSVVVLCGALLEASQQLLDRGVHPQLIASSFLEASKQSEKILREMAVPVDLKDREKLIQIAATSLQSKVVSHNAKLLAPIAVDAVMKVLPEGKDVDNVDLNDIRVVKKLGGTVDESELVKGIVMVEQKVSKRAGGPSRIQNAKIGLIQFCLSAPKTDMENNIVIKDYTAMDRMLREERILIAKMVKQIAATGCNVLLIQKSILRDAVNDLSLDYLAKAKIMVVQNIEREDVEFISRTLGCQPVASLDHFTTDKLGHADLAQDEMVAGGGHIVRITGVNAKNTVTVLLRASNNL…	0	145.207	44	22	70	22	542	58.6	7.23	186.67	22	0.983	0.983	0.975	1.026	1.008	1.008	1.001	1.017	1.013	1.009	-0.02	-0.03	-0.04	0.04	0.01	0.01	0	0.02	0.02	0.01	0.150007	0.43076	0.270666	0.522131	0.778985	0.654909	0.976358	0.61677	0.723859	0.819588	0.996674	0.990049	0.971021
FALSE	High	Master Protein	TGGT1_308090-t26_1-p1	transcript=TGGT1_308090-t26_1 | gene=TGGT1_308090 | organism=Toxoplasma_gondii_GT1 | gene_product=Protein kinase domain-containing protein [Source:UniProtKB/TrEMBL;Acc:A0A125YX85] | transcript_product=rhoptry protein ROP5 | location=AAQM03000031:206-1855(-) | protein_length=549 | sequence_SO=contig | SO=protein_coding_gene | is_pseudo=false	MATKLARLATWLVLVGCLLWRAGAVQLSPPNSRTNDLASGTPHVARGDTEAQSGTGDDSDFPQAVAEEVADMSGGRVPRVPASSTTTSASEGIFRRLVRRLRRGRGTADGAGVADETHQEPRPPLRKRLAQHFRRLRGFFGRLTPRWLSGLGRRAQRWWRGRQRPLLDPSFHGLEAGDSFMRDLLKREEELIGYCREEALKEPAAMVEAVTATVWPQNAETTVDSLLSQGERKLKLVEPLRVGDRSVVFLVRDVERLEDFALKVFTMGAENSRSELERLHEATFAAARLLGESPEEARDRRRLLLPSDAVAVQSQPPFAQLSPGQSDYAVANYLLLMPAASVDLELLFRTLDFLYVLRSTEDFLALHILTAQLIRLAANLQSKGLVHGHFTPDNLFIMP…	0	145.155	36	16	135	8	549	60.7	9.25	328.1	16	1.01	0.993	1.012	0.99	1	0.982	1.002	0.98	0.97	0.989	0.01	-0.01	0.02	-0.02	0	-0.03	0	-0.03	-0.04	-0.02	0.905088	0.634491	0.616573	0.438494	0.99725	0.535646	0.889928	0.613262	0.539745	0.706845	0.996674	0.990049	0.975418
FALSE	High	Master Protein	TGGT1_229010-t26_1-p1	transcript=TGGT1_229010-t26_1 | gene=TGGT1_229010 | organism=Toxoplasma_gondii_GT1 | gene_product=Rhoptry neck protein RON4 [Source:UniProtKB/TrEMBL;Acc:S7WIC1] | transcript_product=rhoptry neck protein RON4 | location=TGGT1_chrVIII:18238-24970(+) | protein_length=984 | sequence_SO=chromosome | SO=protein_coding_gene | is_pseudo=false	MAIKNTLTGSGLLVLLTLACGTTVQSSPPTPAPRMYPNMNERPLSAESRLTPGIYRSELHIDLKSPQKTASQSSLAPTGDNNSKVESIIAGSDTTPRSAEGTSESPPVPQLGTPPRPAPRRSKGEGESQPPTAAPRTSRSVDTGSGSDASTEQQAGEQKVVTPIPASKGIYPNLDELRRSQESNVDAGSGTSTNEGGGTSEGPQVPQPGTPPRTGRRRAKARNRKRHPTPASRESSSEDENQPPTTASRPSNGEGESQPPTAAPRTSRSVDTGSGSDASTEQQAGEQKVVTPIPASKGIYPNLDELRQTQEGEESASQPADVTWFSMSVPMGVVDRRVSRALKEQFFQFLQHLSADYPKQVQTVYEFLGWVADKLPENEEEVQMFIDALNTTEAMVGKA…	0	145.028	39	24	50	24	984	107.3	6.46	150.39	24	1.016	1	0.974	0.985	1.001	0.985	0.959	0.97	0.993	1.021	0.02	0	-0.04	-0.02	0	-0.02	-0.06	-0.04	-0.01	0.03	0.202139	0.945754	0.0135484	0.625639	0.984009	0.58989	0.322624	0.69423	0.802507	0.165799	0.996674	0.998909	0.971021
FALSE	High	Master Protein	TGGT1_310010-t26_1-p1	transcript=TGGT1_310010-t26_1 | gene=TGGT1_310010 | organism=Toxoplasma_gondii_GT1 | gene_product=Sushi domain-containing protein [Source:UniProtKB/TrEMBL;Acc:S7UT16] | transcript_product=rhoptry neck protein RON1 | location=TGGT1_chrXI:969238-974493(+) | protein_length=1158 | sequence_SO=chromosome | SO=protein_coding_gene | is_pseudo=false	MARSSRAAPSGAFAHGVAKASFTWISGMKTPFGCVFFFCLIALWGFSAALRTSDIGVDALSVSSRAAANGSEGGVAQSEQERASDEQRNDSEAHDSVASSESSDAERKDDPPDNKSTSETPEAKLAGRDASNPPASSKSPTPSPAPTPAVSTSTTPAKSSADTSKDPKNKLSSARKEKRIGKKFKRHDEFLADAVIDKLDSMRSVQVSGALLRRIWKEHQRVGDDMRDLLREYILALERELYTQQAEVFGVEQLKMDDVIRHEHSSEARKREVELEMQALAEQHNFMKKLFGHIQANVEAKNTSALVNRIEELDKPIDIIDAIDKRSGSDVLHCLKVIGKSIRYMQESVKKFSRELKTLERLDAERPSGEAERIRETLGFVMDPLSGPLSSMDYESLSW…	0	144.381	39	36	77	36	1158	127.5	4.98	201.02	36	1.015	0.991	1.01	1.015	1.03	1.006	1.025	1.031	1.012	1.022	0.02	-0.01	0.01	0.02	0.04	0.01	0.04	0.04	0.02	0.03	0.377546	0.794561	0.404036	0.429818	0.404749	0.774803	0.122078	0.319101	0.341457	0.546161	0.996674	0.995152	0.971021
FALSE	High	Master Protein	TGGT1_226910-t26_1-p1	transcript=TGGT1_226910-t26_1 | gene=TGGT1_226910 | organism=Toxoplasma_gondii_GT1 | gene_product=Amylo-alpha-1,6-glucosidase [Source:UniProtKB/TrEMBL;Acc:S7UWU6] | transcript_product=Amylo-alpha-1,6-glucosidase | location=TGGT1_chrX:1136138-1153007(-) | protein_length=1882 | sequence_SO=chromosome | SO=protein_coding_gene | is_pseudo=false	MSVKALNPRRLPPPGQAATEFFGETVEKFISYFDSAGELEAPNKNAGNFRVSKGVTVDLVVLNGSQRRPVVACVVETPLGEEDKLPKRTADFGHLVFTFKAALAGPYRIQLEYGPVVASQSGAAANNEDRVIGEKDAEASASRSPASVIIVEPSLSINGVALKQESISLQTVLSRCLGPFSGWKRMFTQTAELGYNVIHFTPLQALGESGSCYSIADQLHISDFFLEDKSLTGERGLEGDSSGAGQAAPGAVMALRRAASSDIVGLEELQAIIRMMETDLGLLSTIDLVLNHTASNSPWLQDHPDSGYSPANSPWLRGAYELDWKLQEFSRRIVRGEFAEKYGATKEINDEGQLQNVMRAFDEELLKPFRMSEWFLLHVDDTVKTWKDACAENAEKDPL…	0	144.338	23	37	70	37	1882	207.9	6.58	167.85	37	1.001	1.008	1.027	0.995	0.996	1.003	1.021	1.004	1.003	1.001	0	0.01	0.04	-0.01	-0.01	0	0.03	0.01	0	0	0.956588	0.566675	0.577807	0.774413	0.586974	0.56914	0.478434	0.901098	0.867228	0.549184	0.998956	0.990049	0.975418
FALSE	High	Master Protein	TGGT1_256990-t26_1-p1	transcript=TGGT1_256990-t26_1 | gene=TGGT1_256990 | organism=Toxoplasma_gondii_GT1 | gene_product=AA_TRNA_LIGASE_II domain-containing protein [Source:UniProtKB/TrEMBL;Acc:S7UYX0] | transcript_product=glycyl-tRNA synthetase | location=TGGT1_chrVIIb:4226828-4230134(+) | protein_length=771 | sequence_SO=chromosome | SO=protein_coding_gene | is_pseudo=false	MQVAPFRRVVRLSLFGLQRRFLSSRKNAIVATRLRALAVSEHFVRQFSTFCGEKKMTTLNGVTPADEAATEQLAEQLRELRVRVTQNAEKVRLLKQANAPAEEIAAGVDTLVHLRAQVTELEKQLESTRPLYYQLRSQCENLLKRRFFVVPSYEIYGGVGGLYDFGPPGCALKSAVEQLWRQHFVLAEDMLEVSGPCLTPHIVLKTSGHVDRFTDLMVKDTVTQDCLRADKYLEEKIDERLNAKEGISPEEASRLALLRRQADALSAAEMKVALEELQVKSPAGNPLSDPFPFNLMFGLKIGPKDEAGAGEEPATGRGQKASAASRSAEGRGYLRPETAQGIFVNFRRLLEFNGGRMPFAAAQLGLGFRNEIAPRNGLLRVREFQMGEIEHFVHPDQKD…	0	143.931	36	29	65	29	771	86.3	7.33	179.94	29	0.998	0.974	0.991	1.023	1.021	0.997	1.014	1.006	1.012	1.005	0	-0.04	-0.01	0.03	0.03	0	0.02	0.01	0.02	0.01	0.0087989	0.204427	0.143074	0.228942	0.24672	0.0116936	0.278214	0.0611679	0.0791279	0.699925	0.996674	0.989773	0.971021
FALSE	High	Master Protein	TGGT1_253290-t26_1-p1	transcript=TGGT1_253290-t26_1 | gene=TGGT1_253290 | organism=Toxoplasma_gondii_GT1 | gene_product=Valyl-tRNA synthetase [Source:UniProtKB/TrEMBL;Acc:S7W1N6] | transcript_product=valyl-tRNA synthetase | location=TGGT1_chrIII:807307-819700(+) | protein_length=1106 | sequence_SO=chromosome | SO=protein_coding_gene | is_pseudo=false	MPTRHDRTVGETRSPFSSPGESIFLHDTAQPSPSCASRGFPCRSASALSILRDEMVTKKNLDGLMAASYHPGDVEKDWYAWWEQENFFSPTSLSLHQRQVYSGSLPVPVSSELAATTKKENQFVMVIPPPNVTGSLHIGHTLTVAIEDSLARWNRMNGKIVLWVPGADHAGIATQSVVERALLKEGAPSRHELGREAFLRKVWDWKRRYGDTICDQLRRVGSSVSWPHFSFTLDEKLSRAVVEAFVRMYDAGLIYREERLVSWSPYLKTAISDVEVDVEEIDKPKKVTIPGFEYPVEVGYLWHFSYEVEGGGRLEVATTRIETMLGDVAVAVNPTDERYSNLVGKRLIHPFFPEREMRVVADDHVVSTFGTGAVKITPAHDKNDYAIAKRHNLPCISIF…	0	143.841	31	33	79	33	1106	124.8	6.64	184.3	33	0.994	0.986	0.976	1.037	1.03	1.022	1.012	1.018	1.014	1.036	-0.01	-0.02	-0.03	0.05	0.04	0.03	0.02	0.03	0.02	0.05	0.828814	0.299336	0.257173	0.190739	0.212219	0.437764	0.0471282	0.658685	0.29991	0.300888	0.996674	0.989773	0.971021
FALSE	High	Master Protein	TGGT1_277270-t26_1-p1	transcript=TGGT1_277270-t26_1 | gene=TGGT1_277270 | organism=Toxoplasma_gondii_GT1 | gene_product=NTPase II [Source:UniProtKB/TrEMBL;Acc:S7UGK0] | transcript_product=NTPase II | location=AAQM03000418:1-4939(+) | protein_length=862 | sequence_SO=contig | SO=protein_coding_gene | is_pseudo=false	LLFQYVPQMHEGAKKLMQLLEEDTVAILDSQLNEKQKVQVKALGIPVMLCSTAGVRDFHEWYRDALFVLLRHLINNPSPAHGYKFFTNPFWTRPITGAEEGLFAFITLNHLSRRLGEDPARCMIDEYGVKQCRNDLAGVVEVGGASAQIVFPLQEGTVLPSSVRAVNLQRERLLPERYPSADVVSVSFMQLGMASSAGLFLKELCSNDEFLQGGICSNPCLFKGFQQSCSAGEVEVRPDGSASVNEDVRKNRLKPLATYCSVNNPEISFKVTNEMQCRENSIDPTKPLAERMKIENCSIIKGTGNFDKCVSQVESILVAPKLPLPANIEAASSGFESVDQVFRFASSTAPMIVTGGGMLAAINTLKDHRLLRSDFSGDVEELAEAAREFCSSEVIIRTD…	0	143.672	45	21	86	7	862	95.7	6.74	218.52	21	0.984	0.974	0.987	1.108	1.091	1.08	1.094	1.057	1.024	1.026	-0.02	-0.04	-0.02	0.15	0.13	0.11	0.13	0.08	0.03	0.04	0.861194	0.596765	0.691703	0.623273	0.481942	0.631669	0.61121	0.374752	0.770925	0.391411	0.996674	0.990049	0.980327
FALSE	High	Master Protein	TGGT1_275690-t26_1-p1	transcript=TGGT1_275690-t26_1 | gene=TGGT1_275690 | organism=Toxoplasma_gondii_GT1 | gene_product=Putative ClpB [Source:UniProtKB/TrEMBL;Acc:S7UMM6] | transcript_product=putative ClpB | location=TGGT1_chrIII:255659-267189(+) | protein_length=1022 | sequence_SO=chromosome | SO=protein_coding_gene | is_pseudo=false	MQRSCLQISGCSALYLPMAWPRGLSGPPRGRSRRLTPRGRLLFLWGALLVALVQQTVGHTIELSTQATSVFGFIPSGIPAGHRSSIKARFCSSVGRASPLRTVTCSKPQTASWYNNLLYRFNLPHVVEEPSRSTELRMAEDGLVLNSEDYTEKAWEAMGALGELADKLESGYVEAEMLLKALLDDGPDGLATQIFSKAGADVPKMQEELNRHLKTQPRMTMGFSDQKVLGRGLQNVLTAAQRYKREFKDQYLSVEHLVLALAAEDTKFTRPFLTRGNVSFNKLRSAVEDIRGKKKVTSKNPELAYQALERYSRDLTAAARAGKLDPVIGRDDEIRRTIQILSRRTKNNPVLLGDPGVGKTAIVEGLAQRIISGDVPDSLKGRRVISLDMAALIAGAKYR…	0	143.476	30	28	68	28	1022	114.5	7.9	182.51	28	0.985	0.974	0.994	1.018	1.003	0.992	1.013	1.022	0.996	1.02	-0.02	-0.04	-0.01	0.03	0	-0.01	0.02	0.03	-0.01	0.03	0.479627	0.415453	0.192278	0.249272	0.925695	0.635422	0.402683	0.530068	0.124939	0.136841	0.996674	0.990049	0.971021
FALSE	High	Master Protein	TGGT1_273460-t26_1-p1	transcript=TGGT1_273460-t26_1 | gene=TGGT1_273460 | organism=Toxoplasma_gondii_GT1 | gene_product=Eukaryotic translation initiation factor 3 subunit L [Source:UniProtKB/TrEMBL;Acc:A0A125YVE2] | transcript_product=eukaryotic translation initiation factor 3 subunit 6 interacting protein | location=TGGT1_chrVIII:3489847-3495730(-) | protein_length=639 | sequence_SO=chromosome | SO=protein_coding_gen…	MSGEGQVADAGSLPVEKREEGAQVGHEEDDSLSPDSRFPVSPSNQASQNVEGEGLDDAALDRMMGEKVRFENDVEEFLRSLYDEVYDRNVDAIRRLYEVEFPALTERYYAERRWPSVDEVGTFYRQFDRYHCLIITLYKELYYRHLFLKCQQEITWEDRRLAWENYALLINFLAEVECRPDDQKDGKSLRLPLQWLWDILDEFVYQFQEACRWRQRIARRLPEDEEERALFLKEMDKDCDVWKASPVLEFLHALVQRSEVQDLLRQPKDDATKNKLFESEIRFQLGYFAMILLLRLHVLMGDYFMGVKSVESIELASRGFYWKVPAAHVTLFYHLGFAYTMMRRYTDAIRVMSQLLVFVSRQRSYLSAHFYQQMAMNKAVDKMYILVMLCASLCNVKLD…	0	142.772	42	25	73	25	639	75	5.71	198.85	25	1.005	0.99	1.002	1.009	1.014	0.999	1.01	0.989	1	1.029	0.01	-0.01	0	0.01	0.02	0	0.01	-0.02	0	0.04	0.0299608	0.448666	0.920704	0.147231	0.0844844	0.904729	0.507338	0.437028	0.562818	0.1709	0.996674	0.990049	0.992295
FALSE	High	Master Protein	TGGT1_290290-t26_1-p1	transcript=TGGT1_290290-t26_1 | gene=TGGT1_290290 | organism=Toxoplasma_gondii_GT1 | gene_product=UBA_e1_C domain-containing protein [Source:UniProtKB/TrEMBL;Acc:S7UQ93] | transcript_product=ubiquitin-activating enzyme E1 family protein | location=TGGT1_chrIX:3489378-3499339(+) | protein_length=1092 | sequence_SO=chromosome | SO=protein_coding_gene | is_pseudo=false	MATPQESSGAAAHIDTDLYSRQIGAFGLETMGKLITLRVLISGMRGVGAECAKNLILAGPNTVVLHDPAPCEMRDLGSNFCLTEEHVKKGVSRAEASKNYLAELNQYVTVDVLPDEKLTQEVVSRFDVVIVTEAGNEELKKINAFCRSASKPVGFIAANVFGLAASVFVDLGERFVCLDSDGEEPREVIVAGITHERAATVHTHTDKLLPFQDGDFVVFREVQGMEINDLQPMQIRVTGKHSFQIGDTTAFSPYVSGGIARQVKMPQTIRFKSYEASCRAPVAAGEAMLIVPDLGKFGQSEQLHLAFQAVLNFRDRNGGNAHALPPHPLDAARAGSQQAAVAACVAEAQRLNGEAKQLAERGEQGVVFVDQVDEKLVANVAAYAQCQISPMAAFVGGVL…	0	142.757	30	29	55	29	1092	119.7	5.8	165.12	29	0.985	0.981	0.974	1.06	1.045	1.04	1.033	1.058	1.064	1.03	-0.02	-0.03	-0.04	0.08	0.06	0.06	0.05	0.08	0.09	0.04	0.692611	0.298252	0.316171	0.390135	0.177949	0.429917	0.441865	0.415998	0.242568	0.244095	0.996674	0.989773	0.971021
FALSE	High	Master Protein	TGGT1_305340-t26_1-p1	transcript=TGGT1_305340-t26_1 | gene=TGGT1_305340 | organism=Toxoplasma_gondii_GT1 | gene_product=Corepressor complex CRC230 [Source:UniProtKB/TrEMBL;Acc:S7VWG3] | transcript_product=corepressor complex CRC230 | location=TGGT1_chrIX:5155746-5169422(+) | protein_length=1916 | sequence_SO=chromosome | SO=protein_coding_gene | is_pseudo=false	MEEVGEGLRGASLSAGAEAFLPKPMATNGARAPEEDAGGSNCVSEKAASFTAENVSFPQSLSRLDSCRCVTNADGHHFLLCQEEENIDILRQSSSSFYPSNPEGVFVLHSPLPPRLTETACTSASDKSSAGPRRVVAVSIPLAVSKSEREARELLKTHLPDWEVALHAFLKKNSIEGSEVLNENPRATMSSDLDRRADGAVDPAATEAPTHAIPSSDAPAPSPPTPLTDETRAAGNDACSSGALTGAAEQATSGFPSQPPALIPKEEPRDDDRPAAVAGNGPQAESGAAATGPASPIGGDSPASGPPAAAPAAALAAPEKTPGGRDGAQVSAHSSLASPGSAAPNGAPAKAPSQAFAETGPQAAAQAAAGAPSRAPAPAAAPQRRPTLFNLLDALAHDS…	0	142.595	20	32	59	32	1916	207.2	5.95	159.19	32	1.098	0.992	0.983	0.996	1.094	0.988	0.979	0.981	0.983	1.004	0.14	-0.01	-0.03	-0.01	0.13	-0.02	-0.03	-0.03	-0.03	0.01	0.00225107	0.552159	0.573325	0.841594	0.115696	0.311427	0.168785	0.213368	0.484514	0.92991	0.996674	0.990049	0.975418
FALSE	High	Master Protein	TGGT1_321680-t26_1-p1	transcript=TGGT1_321680-t26_1 | gene=TGGT1_321680 | organism=Toxoplasma_gondii_GT1 | gene_product=HABP4_PAI-RBP1 domain-containing protein [Source:UniProtKB/TrEMBL;Acc:A0A125YT80] | transcript_product=hypothetical protein | location=TGGT1_chrIb:1645852-1649258(-) | protein_length=372 | sequence_SO=chromosome | SO=protein_coding_gene | is_pseudo=false	MAPQRKYYTVGVSNKFSAFADNDSEGGDSSGEEDVILSSPPVPTAETQSTGKQLSGTNAGSAAGKKANEGVSAHHDSERRPRASAGGRYGREDQSAANAYRQGEFGGRGRGGQRGRFPRRNFVQGEENEENVEQTFGVRRGNFRGGRGRGGFYSRGRGGVQGDRHTAAAMGGRDPKKGGGGAHNWGDDERVAAAGEQEVEKTEEEKEKRQDSEEAEEEKKGGEEDVEEEKKDEEVLDLEAYKKMLEGKRQNLPNFIKKSNKKITTDQELEAQGYTLHVKEGREEEEEETASEEEDEHAEPKKKTMNVFEYIHNGGGRVNLFPSRRRGRGGAGPTGSREFRGGRGRGRGGSFVKSRDAPDIQDERAFPTLGGR	0	141.361	53	24	69	24	372	40.7	6.16	196.85	24	1.012	0.989	0.976	1.042	1.055	1.031	1.018	1.009	1.045	1.013	0.02	-0.02	-0.03	0.06	0.08	0.04	0.03	0.01	0.06	0.02	0.229919	0.349964	0.324712	0.246838	0.142908	0.203999	0.66793	0.866043	0.440969	0.574522	0.996674	0.990049	0.971021
FALSE	High	Master Protein	TGGT1_233220-t26_1-p1	transcript=TGGT1_233220-t26_1 | gene=TGGT1_233220 | organism=Toxoplasma_gondii_GT1 | gene_product=hypothetical protein | transcript_product=hypothetical protein | location=TGGT1_chrVIII:2508163-2514202(-) | protein_length=1476 | sequence_SO=chromosome | SO=protein_coding_gene | is_pseudo=false	MEQSAGVRRFFSNLSFIGTTVALLLLASAGLPISASAEAANENAAAGVWTQPSVSRESGPVLDVMRTALLRSANSSSATSLDKTQSDQMADTDVGVTLDSLRDLTDSQERVAAADTAAILSSELDQFPAAHVVALSPRYRLLSSFTTNASVASSSGESGRLFSTTRKEGTTPRALRPKAEKSATVNQGEGQPTEFAIDATDDGHKLAPRRGTGIEAKAGGAQESEERADASWELGAPPSSLNVESVLATPPAAAGVSHMHSMPGKGYPGVASLSGRAIEEQDVSRFSAENEAVDKPRHLRDDDVYAAFSETGEHHRSAEPSDASSGLSRPSGTPNPPNIILSGDASSTSGNSHSPAEASTGRRRHAGGAFPTSDDEIREWLITGAPFVPQVPAASINGP…	0	140.208	28	30	51	30	1476	159.9	6.54	140.87	30	1.021	0.995	1.014	0.998	1.019	0.993	1.012	0.96	0.976	0.991	0.03	-0.01	0.02	0	0.03	-0.01	0.02	-0.06	-0.04	-0.01	0.400619	0.504426	0.0801462	0.896511	0.621248	0.767658	0.568323	0.276038	0.382161	0.530779	0.996674	0.990049	0.971021
FALSE	High	Master Protein	Q15149	Plectin OS=Homo sapiens (Human) OX=9606 GN=PLEC PE=1 SV=3	MVAGMLMPRDQLRAIYEVLFREGVMVAKKDRRPRSLHPHVPGVTNLQVMRAMASLRARGLVRETFAWCHFYWYLTNEGIAHLRQYLHLPPEIVPASLQRVRRPVAMVMPARRTPHVQAVQGPLGSPPKRGPLPTEEQRVYRRKELEEVSPETPVVPATTQRTLARPGPEPAPATDERDRVQKKTFTKWVNKHLIKAQRHISDLYEDLRDGHNLISLLEVLSGDSLPREKGRMRFHKLQNVQIALDYLRHRQVKLVNIRNDDIADGNPKLTLGLIWTIILHFQISDIQVSGQSEDMTAKEKLLLWSQRMVEGYQGLRCDNFTSSWRDGRLFNAIIHRHKPLLIDMNKVYRQTNLENLDQAFSVAERDLGVTRLLDPEDVDVPQPDEKSIITYVSSLYDAM…	0	140.166	11	51	54	51	4684	531.5	5.96	92.06	51	1.023	1.058	1.001	0.974	0.996	1.03	0.975	1.018	1.034	1.025	0.03	0.08	0	-0.04	-0.01	0.04	-0.04	0.03	0.05	0.04	0.185042	0.284809	0.863643	0.379172	0.769762	0.629628	0.287106	0.845765	0.76142	0.750567	0.996674	0.989773	0.987792
FALSE	High	Master Protein	TGGT1_221620-t26_1-p1	transcript=TGGT1_221620-t26_1 | gene=TGGT1_221620 | organism=Toxoplasma_gondii_GT1 | gene_product=Tubulin beta chain [Source:UniProtKB/TrEMBL;Acc:A0A125YYZ4] | transcript_product=putative beta-tubulin | location=TGGT1_chrII:472166-474503(-) | protein_length=449 | sequence_SO=chromosome | SO=protein_coding_gene | is_pseudo=false	MREIVHIQAGQCGNQIGAKFWEVISDEHGVDPTGTYTGDSDLQLERINVFYNEATGGRFVPRAILMDLEPGTMDSVRAGPFGQLFRPDNFVFGQTGAGNNWAKGHYTEGAELIDSVLDVVRKEAEGCDCLQGFQITHSLGGGTGSGMGTLLISKVREEYPDRIMETFSVFPSPKVSDTVVEPYNATLSVHQLVENADEVQVIDNEALYDICFRTLKLTTPTYGDLNHLVSAAMSGVTCSLRFPGQLNSDLRKLAVNLIPFPRLHFFLIGFAPLTSRGSQQYRALTVPELTQQMFDAKNMMCASDPRHGRYLTACALFRGRMSTKEVDEQMLNVQNKNSSYFVEWIPNNMKSAVCDIPPKGLKMSVTFVGNSTAIQEMFKRVSEQFTAMFRRKAFLHWYT…	0	139.415	52	18	117	5	449	50	4.81	314.01	18	0.954	0.944	0.937	0.995	0.949	0.939	0.932	0.961	0.986	0.987	-0.07	-0.08	-0.09	-0.01	-0.08	-0.09	-0.1	-0.06	-0.02	-0.02	0.532236	0.147675	0.0622844	0.886144	0.629869	0.136784	0.284619	0.614655	0.858296	0.102746	0.996674	0.989773	0.971021
FALSE	High	Master Protein	TGGT1_235020-t26_1-p1	transcript=TGGT1_235020-t26_1 | gene=TGGT1_235020 | organism=Toxoplasma_gondii_GT1 | gene_product=WD_REPEATS_REGION domain-containing protein [Source:UniProtKB/TrEMBL;Acc:S7UVW7] | transcript_product=putative COPI protein | location=TGGT1_chrX:4501792-4518157(-) | protein_length=1256 | sequence_SO=chromosome | SO=protein_coding_gene | is_pseudo=false	MPLRVSLKKHFFARSERVKSVDFHPTEPFLLSALYDGRLQIHDYTTHALVKEIDASPLPLRTAKFIVKRQWMICGGDDCALRVFNIHTLEKVKEIPSAHGDYIRHISVHAAKPLVLSSSDDMTVKLWHYEKNWQKVASYEQHTHYVMQTQWHPRDPNLFASCSLDRTIKVWGIQVRSSSPSASDSSAAVVSAPHFTLTGHERGVNCIEYSKSGERPYLVSGSDDCTVRVWDYQTKQCIQVLSGHSRNVCSVLLTSLAGHVLPLLFSAGEDAQLFVWHALTYKKELSLDLNVERIWSLSLLDPSSAASASTSGSAGVASAAGATGSGAGGLGGLVLAIGSDSGTLVLKMGKEQPVASLHSGKAVVARGFEILQVNLRLLEEQQYQDGERLPVAYKELGQC…	0	139.358	26	27	52	27	1256	137	6.16	136.17	27	1.03	0.996	1.027	0.982	1.011	0.978	1.009	1.031	1.006	0.997	0.04	-0.01	0.04	-0.03	0.02	-0.03	0.01	0.04	0.01	0	0.30833	0.443626	0.528864	0.526245	0.798925	0.397985	0.533955	0.332797	0.865346	0.951868	0.996674	0.990049	0.973444
FALSE	High	Master Protein	TGGT1_243710-t26_1-p1	transcript=TGGT1_243710-t26_1 | gene=TGGT1_243710 | organism=Toxoplasma_gondii_GT1 | gene_product=T-complex protein beta subunit [Source:UniProtKB/TrEMBL;Acc:S7UFS3] | transcript_product=t-complex protein beta subunit | location=TGGT1_chrVI:2717493-2725570(+) | protein_length=568 | sequence_SO=chromosome | SO=protein_coding_gene | is_pseudo=false	MISEGGVPDVLQRGAQQDRGETARLQYFVGAIAVGELVKSTLGPKGLDKILTPMQGVEGGRNGRTIITNDGATILKSVWLDNPAAKILADVALQQDTVCGDGTTGVVVLASELLKQAEELVNQNIHPQIITAGYRKALAVARKRLQEISFGCEDDGLREYLMKVARTTLSSKLLTHEKEHFAKIAVDAILRLKEHASSLELVHIIKKPGGGLRDSFLDEGFILEKRIGTCQPKVQEDCRVMVANTPMDTDKIKIYGARVSVDSFEAVQALELAEKEKMKQKVDKIAAYGCNVFINRQLIYNYPEQIFQDHKVIAIEHADFDGMERLAAALGAEIISTFDAPDPSKLGYCKKMEEIMIGEDKVIRFSGCKRGEACTIVLRGGSEHGLEEAERSLHDALAI…	0	138.583	43	20	60	20	568	61.4	5.92	175.02	20	1.01	1.043	1.016	0.975	0.985	1.017	0.991	0.996	1.011	0.998	0.01	0.06	0.02	-0.04	-0.02	0.02	-0.01	-0.01	0.02	0	0.788868	0.234968	0.165874	0.366674	0.790172	0.69682	0.597957	0.900545	0.731466	0.857344	0.996674	0.989773	0.971021
FALSE	High	Master Protein	TGGT1_244200-t26_1-p1	transcript=TGGT1_244200-t26_1 | gene=TGGT1_244200 | organism=Toxoplasma_gondii_GT1 | gene_product=Transket_pyr domain-containing protein [Source:UniProtKB/TrEMBL;Acc:S7UEM2] | transcript_product=putative 2-oxoglutarate dehydrogenase e1 component, mitochondrial precursor | location=TGGT1_chrVI:3022117-3029688(-) | protein_length=1116 | sequence_SO=chromosome | SO=protein_coding_gene | is_pseudo=fa…	MRSLRSFSTSRWTRGASLSHPTARRSPSASLSLSSSLLSPVVVSARESLLGSSRRSACGASRLLACDFASSRPTSAAALTGAPLASESFLTGTSAAYVEQMYNAWQRDPSSVHASWNAYFTNVVQDLPAGASFCLPPSAGVSSGLLGSTTAVGGAARGAPFISSAPGSLPAGASFVTPESLPVSPQQSVHDTSRLIQMVRGYQMRGHEIAAVNPLSLPQETPFVSGSRGPTPAGTLDFEAYGFTKADLDKVYDCRVDGMCGFLSPEFPPRPLRQIIQRLEEAYCGSVGVEYMHIGDRNVCNFIRQWIETPAKYGFTTDMKKKILARTARSQMFENFCGQKFSTSKRFGLDGCETMIVAMKAITKKAAREGVNSVVIGMPHRGRLNVLVNVLHKPMQQLL…	0	138.133	26	24	55	24	1116	124.2	7.11	175.78	24	0.965	0.958	0.994	1.019	0.983	0.976	1.012	0.997	1.005	0.998	-0.05	-0.06	-0.01	0.03	-0.02	-0.04	0.02	0	0.01	0	0.274574	0.0020113	0.86577	0.246878	0.606264	0.19133	0.680682	0.904784	0.635055	0.864909	0.996674	0.980125	0.987869
FALSE	High	Master Protein	TGGT1_240980-t26_1-p1	transcript=TGGT1_240980-t26_1 | gene=TGGT1_240980 | organism=Toxoplasma_gondii_GT1 | gene_product=hypothetical protein | transcript_product=hypothetical protein | location=TGGT1_chrVI:1573378-1582470(+) | protein_length=1420 | sequence_SO=chromosome | SO=protein_coding_gene | is_pseudo=false	MSGGGSEPLESEAEGFSEAPHAGEETEKSKTAERQSGEKSAASSSLLSLGSRPLEEEGRRKEASPPSTEKKTGGSWFNFLFAKWRGTHKHRNAIQLAQAFGAANQPGKPGPVIGIVVCKGPRNELQGLAVATPRVVERYLLDGRLQQRVAVPEPLTCFVGGKIGGVGRVLLCGTQAGRVFVLKAETFEQLLELDSRAAYATAGVSLDLPCLPPRGGLTFCRDPLGRGGDGGSTRKGNAFWIESSKRERKHEEQSPAGRLDTAASLLVGRAFDGDSSSAAPGRARRVEHRRASAGSSERSESTENDDGESERQREQSEEPIEFPACLAISALAIKATFAEFVHYVIAGNVRGHVFVWQVPSTKLVHLLTFPVDRADAAFLRSQESLSSTSSLSHGAEETL…	0	137.494	29	31	44	31	1420	152.1	5.14	112.51	31	0.985	0.958	0.978	0.996	0.981	0.954	0.974	0.938	0.968	0.968	-0.02	-0.06	-0.03	-0.01	-0.03	-0.07	-0.04	-0.09	-0.05	-0.05	0.747494	0.188649	0.43016	0.192749	0.678674	0.189008	0.355994	0.0984828	0.450105	0.252761	0.996674	0.989773	0.973444
FALSE	High	Master Protein	TGGT1_204050-t26_1-p1	transcript=TGGT1_204050-t26_1 | gene=TGGT1_204050 | organism=Toxoplasma_gondii_GT1 | gene_product=Peptidase_S8 domain-containing protein [Source:UniProtKB/TrEMBL;Acc:S7UVC6] | transcript_product=subtilisin SUB1 | location=TGGT1_chrVIIa:1932241-1938144(+) | protein_length=795 | sequence_SO=chromosome | SO=protein_coding_gene | is_pseudo=false	MGSSHAIVACAALIVLLSTNARGLRVRKDKDVLLATSFLSHHGEYQNPTSTYNLIKEIRKVEAEIEDEVETLNRDRRLHRGHNKYADDDIRQGLKDEQDMGASENIPVAELEPQDLDREAKYPVRMLIVDKRSDDDDDEETKTSFVETALHSDLAQRVVKELNGHVDVLRESGVVLVDLPAQTTDKQLQELIETARAQGTIVEPDHLVQSVNTSSKGSNDPLLDRLWGMDALNVKGAWDIITTGEPNMGSRRPLVCVLDTGIDYNHPDLRDNMEVNQAERDGTPGVDDDNNGEVDDIYGANMLSKENDPADDHSHGTHVAGTIGAHGNNGIGVAGVAWAPRLLPCKFLAYTGRGYSSDAVRCIDYCVKRGADIVNHSWGGSWPSEALREAVVRTANNGL…	0	136.629	42	25	49	25	795	85	5.39	123.09	25	1.028	1.054	1.025	1.097	1.128	1.156	1.124	1.006	0.992	0.994	0.04	0.08	0.04	0.13	0.17	0.21	0.17	0.01	-0.01	-0.01	0.4873	0.290555	0.619449	0.595354	0.43803	0.384433	0.416394	0.798499	0.847173	0.900092	0.996674	0.989773	0.975418
FALSE	High	Master Protein	TGGT1_304760-t26_1-p1	transcript=TGGT1_304760-t26_1 | gene=TGGT1_304760 | organism=Toxoplasma_gondii_GT1 | gene_product=RNA recognition motif-containing protein [Source:UniProtKB/TrEMBL;Acc:S7W2V6] | transcript_product=RNA recognition motif-containing protein | location=TGGT1_chrVIIa:667907-675253(+) | protein_length=1335 | sequence_SO=chromosome | SO=protein_coding_gene | is_pseudo=false	MATTSLEEEEYMEGERDEGWGEAGEQREGRLVVAQSRSVSRERELHAASFPVEYDGEDDSPYLQPSERVASKRDEGDPEESDVDHEREERDACYGWESEKEGRPEAPDEGSAASRDEDAEARDDGEGGRQEGGEEDVGENEGEEAAEDLEETRRDDEDSLTICGEKGNDSDPIDERKVFVGNTPLAVREPSVERIFGEFGKLSEIKIFKHFLHLTYDDATAATRAVEELNDKEVWGAQIVVEPLRPGAASQRPPGAGAARVVVSRGERDTGAPGVERGRGRGRSGAVAGRGKSAGSVAGARRGGRGRGGQAAGPGGKRLPFRVVCHNLDPRVHWQDLKDFGREAGEVNFTNVLHNQEGVRIGIIEYCSQEDMETALHELDGKRLFDARVEVRREEANAS…	0	136.452	30	32	46	32	1335	147	6.16	114.29	32	1.022	1.006	0.999	0.993	1.015	0.999	0.992	1.007	1.029	1.031	0.03	0.01	0	-0.01	0.02	0	-0.01	0.01	0.04	0.04	0.73073	0.614797	0.33555	0.698721	0.742969	0.856455	0.645623	0.582732	0.470115	0.0835662	0.996674	0.990049	0.971021
FALSE	High	Master Protein	TGGT1_270510-t26_1-p1	transcript=TGGT1_270510-t26_1 | gene=TGGT1_270510 | organism=Toxoplasma_gondii_GT1 | gene_product=AA_TRNA_LIGASE_II domain-containing protein [Source:UniProtKB/TrEMBL;Acc:S7WKJ0] | transcript_product=asparaginyl-tRNA synthetase (NOB+tRNA synthase) | location=TGGT1_chrVIII:5218409-5221722(+) | protein_length=676 | sequence_SO=chromosome | SO=protein_coding_gene | is_pseudo=false	MPRRCWQLFVCCSVREFPVSVASRLLLPLLFVLASARNSALLYSSALTLRSSAAPLAFSSAGCRFRGSLHRPRFPVRLPPPDQAYLSRNSASGTSPRSIRQFPVPSGLALPTSVPLCARTLPPLSRHFASAGTMAQPQGESKSFTPGHLEDQVPTSCKQAIPVFGCGSTRVRLAALLDGGEASVEKFVNRETPVTVCGWSRSVRKQGGGSLCFVVLSDGSTSSNLQVVVEAGIGGEFPQLLKCGAGCSFRFTGDIVKSPAKGQAVELAVRDPSKGHRFEILGMTDAAKYPLAKKEHTREYLREIAHLRPRSYLIGAVMRVRSNLAMATHRFFQDRGFLYIHTPIVTASDCEGAGEMFQVSTLLPPPPPETRENEKKTDGAAPKDAAAAAAEPLIPLTKD…	0	134.879	34	23	115	23	676	74.9	8.03	269.55	23	1.012	0.995	0.999	0.988	1	0.983	0.987	0.998	0.986	1.008	0.02	-0.01	0	-0.02	0	-0.03	-0.02	0	-0.02	0.01	0.196075	0.155244	0.450263	0.468221	0.989742	0.391687	0.466908	0.47964	0.0500607	0.478181	0.996674	0.989773	0.973444
FALSE	High	Master Protein	TGGT1_250770-t26_1-p1	transcript=TGGT1_250770-t26_1 | gene=TGGT1_250770 | organism=Toxoplasma_gondii_GT1 | gene_product=Putative eukaryotic initiation factor-4A [Source:UniProtKB/TrEMBL;Acc:A0A125YLG0] | transcript_product=putative eukaryotic initiation factor-4A | location=TGGT1_chrXII:5123731-5125767(-) | protein_length=412 | sequence_SO=chromosome | SO=protein_coding_gene | is_pseudo=false	MENNEDKQQQGQQAGGAAVAAPTPANDEVIETNYDEVVDSFDALKLNESLLRGIYSYGFEKPSAIQQRGIKPILDRHDTIGQAQSGTGKTATFAIAALQLIDYNINNCQVLILAPTRELAQQIQKVVLALGDYLQVRCHACVGGTVVRDDIAKLKAGVHMVVGTPGRVHDMMEKRHLRVDDMKLFIMDEADEMLSRGFKSQIYDVFKKLPPDVQVALFSATMPQDILELTTKFMRDPKRILVKNDELTLEGIRQFYVAVEKEDWKLETLCDLYETLTITQAIIYCNTRRKVDFLTSKMSERDFTVSSMHGDMDQKSREMIMREFRSGSTRVLITTDLLARGIDVQQVSLVINYDLPATKENYIHRIGRSGRFGRKGVAINFVTSSDVEQLKEIEKHYNT…	0	134.702	53	20	110	18	412	46.6	5.67	285.47	20	0.994	0.963	0.987	1.032	1.026	0.994	1.018	1.003	1.011	1.046	-0.01	-0.05	-0.02	0.04	0.04	-0.01	0.03	0	0.02	0.07	0.88829	0.426379	0.303254	0.191569	0.462742	0.80244	0.0971083	0.591624	0.356283	0.0279025	0.996674	0.990049	0.971021
FALSE	High	Master Protein	TGGT1_279420-t26_1-p1	transcript=TGGT1_279420-t26_1 | gene=TGGT1_279420 | organism=Toxoplasma_gondii_GT1 | gene_product=hypothetical protein | transcript_product=hypothetical protein | location=TGGT1_chrIX:26421-30410(+) | protein_length=1329 | sequence_SO=chromosome | SO=protein_coding_gene | is_pseudo=false	MSMSSLQLASADARMGKEDRATTVPGPGISRLSLRQCVCSLLLSVCTLGIPIKSAILGVASFSGSDVSRFYVPHIGGVGARSVSLTEDEYLPEQINFPPAAEEARDGVFSQWRGVRRGVAVQRHEHFDGSAINSHEEDADVSLEQLMNDLGVGEDDVEERVSSWQGTSHSRSGADVTMNAFGFSELKSTKSSTAPSDSVKAAATRLNPSDSKYREQRVMDLLEQLETLTRQTPVAGEDDQFVDFSFEPDSVTTSDINESPSSVEGRRDVSQAYGDIRPKSATTLFRDTEAGISMTDVSGDDDSSARHGDKGDSSNEQAIEPPSANEAAESDSSHDSTDVADGPAEAGTEDPSGGSPHSPESEPGNAVAEESLTSMERNEKDTAAQPISTEPVAEQPDVE…	0	133.725	24	28	55	28	1329	144.9	5.2	162.93	28	1.007	1.003	1.036	0.967	0.973	0.97	1.002	0.987	0.987	0.962	0.01	0	0.05	-0.05	-0.04	-0.04	0	-0.02	-0.02	-0.06	0.848053	0.54799	0.323474	0.271715	0.246348	0.232122	0.752521	0.590514	0.474399	0.254786	0.996674	0.990049	0.971021
FALSE	High	Master Protein	TGGT1_230420-t26_1-p1	transcript=TGGT1_230420-t26_1 | gene=TGGT1_230420 | organism=Toxoplasma_gondii_GT1 | gene_product=Cation_ATPase_N domain-containing protein [Source:UniProtKB/TrEMBL;Acc:A0A125YSA2] | transcript_product=sarco/endoplasmic reticulum Ca2+-ATPase | location=TGGT1_chrVIII:760295-772731(+) | protein_length=1093 | sequence_SO=chromosome | SO=protein_coding_gene | is_pseudo=false	MDLSNEKAVGALSKHRASPNSESGTVSSSPDLLSSLQDVNIHTKAHVLDAEEVVRQLKADAKRGLSEADACERLELFGKNELEQEPGKSLLQLILEQFQDLLVRILLSAAVVSFILALFEGGAEEGVTAFIEPLVILIILILNAAVGVWQESNAEKALEALKELQPAQGRVLRGGVWRLLPSANLVPGDIIDVRCGDKVPADCRVLALKSTTLRVEQSQLTGESVTVNKDAEVLAASYEDCEVQSKSNLLFSSTTVASGHAVAVVVATGMRTEIGKIQSAVQEAGADDEDQTPLQQKLDEFGEILSKVIFVICIVVWVINIKHFSDPVHGGFLRGCIYYFKIAVALAVAAIPEGLPAVITTCLALGTRKMAKKNAIVRKLASVETLGCTTVICSDKTGT…	0	133.703	30	27	62	27	1093	118.8	5.43	173.55	27	1.007	0.998	0.97	1.012	1.019	1.01	0.981	1.001	1.001	1.021	0.01	0	-0.04	0.02	0.03	0.01	-0.03	0	0	0.03	0.396971	0.786999	0.0957944	0.739736	0.666587	0.730055	0.666734	0.968097	0.979537	0.515468	0.996674	0.995152	0.971021
FALSE	High	Master Protein	TGGT1_310150-t26_1-p1	transcript=TGGT1_310150-t26_1 | gene=TGGT1_310150 | organism=Toxoplasma_gondii_GT1 | gene_product=AMP-binding domain-containing protein [Source:UniProtKB/TrEMBL;Acc:S7W186] | transcript_product=AMP-binding enzyme domain-containing protein | location=TGGT1_chrXI:1055873-1060273(-) | protein_length=866 | sequence_SO=chromosome | SO=protein_coding_gene | is_pseudo=false	MPVSGARASCGDSYSVLATQLARVRRTFFLSAGDVVTRKKHAFDAVSLVFGWKLSASSGVVNECSRLNLVDIRPATSEKESLFQRCSETRRRKPLGILDTMIYATPVGSPGPGESATWQSTGFAAYSASPMPLGESSYRTLLDPDLQVDSFAGSRILDPLTDDDWWESAYGIFLVGVSAHAGPEKPCIGERRSAAIADGFDYTTYAQVDETVRALGSGLADLMRKDGIKLETFPDEERNDGKFANVGILLQSRKEWLFTDLAVSAYPPLTSVTLHYTFPAEHVKSIAEQSKLSCIVTDVDKLKLLAELKPSLGELKTIVVMSARSPLDPPEELDLSGEKKDFAALGVELLSFDEVIDIGRKHPTRPVVKQDPERVFTIVYTSGTTGNPKGVMLTNRNWV…	0	133.443	37	28	65	27	866	95.9	7.24	141.84	28	1.014	1.013	1.021	0.977	0.99	0.989	0.998	0.993	1	0.982	0.02	0.02	0.03	-0.03	-0.01	-0.02	0	-0.01	0	-0.03	0.670949	0.00161567	0.372789	0.623771	0.53392	0.807742	0.935052	0.851379	0.993832	0.00839132	0.996674	0.980125	0.971021
FALSE	High	Master Protein	TGGT1_201780-t26_1-p1	transcript=TGGT1_201780-t26_1 | gene=TGGT1_201780 | organism=Toxoplasma_gondii_GT1 | gene_product=VWFA domain-containing protein [Source:UniProtKB/TrEMBL;Acc:A0A125YK19] | transcript_product=microneme protein MIC2 | location=TGGT1_chrVIIa:3693727-3696991(-) | protein_length=769 | sequence_SO=chromosome | SO=protein_coding_gene | is_pseudo=false	MRLQREAVFGLMFACGMWMWPSEVAGGGWSIVDALRKRYDTSRGGDANGVDTSGVEDVIQSDSAIGAAEGCTNQLDICFLIDSSGSIGIQNFRLVKQFLHTFLMVLPIGPEEVNNAVVTYSTDVHLQWDLQSPNAVDKQLAAHAVLEMPYKKGSTNTSDGLKACKQILFTGSRPGREHVPKLVIGMTDGESDSDFRTVRAAKEIRELGGIVTVLAVGHYVKHSECRSMCGCSGTSDDDSPCPLYLRADWGQLATAIKPMLKEVCKTLPQDAICSDWSAWSPCSVSCGDGSQIRTRTEVSAPQPGTPTCPDCPAPMGRTCVEQGGLEEIRECSAGVCAVDAGCGVWGEWSAWSASCGNATRKRERTRYNDPPPQGAGRRCENQDPPVLQEQTEEATLAPC…	0	133.345	30	16	83	16	769	82.6	4.83	251.53	16	0.955	0.963	0.945	1.117	1.067	1.075	1.056	1.02	1.042	1.026	-0.07	-0.05	-0.08	0.16	0.09	0.1	0.08	0.03	0.06	0.04	0.452293	0.327803	0.22276	0.539084	0.587947	0.610464	0.694452	0.669395	0.473643	0.442092	0.996674	0.989773	0.971021
FALSE	High	Master Protein	TGGT1_204130-t26_1-p1	transcript=TGGT1_204130-t26_1 | gene=TGGT1_204130 | organism=Toxoplasma_gondii_GT1 | gene_product=MACPF domain-containing protein [Source:UniProtKB/TrEMBL;Acc:S7UUF6] | transcript_product=perforin-like protein PLP1 | location=TGGT1_chrVIIa:1864038-1872889(-) | protein_length=1161 | sequence_SO=chromosome | SO=protein_coding_gene | is_pseudo=false	MFVVDLSLSGNMRSLTHGKSIHRSSIVVVTHCSHRLSLSLLNRPALFPSHSDRYTVPWRCRPSSWRLWITFVCLSTLHMFGLSSAVKRDGEVPTANLRASLSPDSSKEDAMLLSAIGGIGPTESRLQHIPFRTTRYLPIRSHVLQSTVERIESPEALNEVPTKVERNEFTEKGDKTEQVLTAQADHKSLLEGRSESTSTAPDDDFDFLFEDDTPKKPKSRVNKGTSSDETSPGDRSSGEGSSDSDSLLSVVHRTKGNATQANKNQTRITHPKSKAQHQKKVTKKQGIPGSDSLGTSSADFDFDIDSSSNTQADDSQRQSLGDSSALDLFGSDTGDTGDIFGFSNSSSDGGNAAANDGGLFSSSGMGPTGASDETSANPLGSILGGVLNPFAQQQSITPM…	0	133.148	25	21	45	21	1161	125.4	6.43	134.52	21	1.024	0.991	0.983	1.009	1.032	1	0.992	0.985	0.98	0.971	0.03	-0.01	-0.02	0.01	0.05	0	-0.01	-0.02	-0.03	-0.04	0.484461	0.835556	0.340423	0.922934	0.634962	0.998494	0.914949	0.264309	0.586582	0.263545	0.996674	0.995642	0.971021
FALSE	High	Master Protein	TGGT1_229990-t26_1-p1	transcript=TGGT1_229990-t26_1 | gene=TGGT1_229990 | organism=Toxoplasma_gondii_GT1 | gene_product=Putative T-complex protein 1 subunit alpha [Source:UniProtKB/TrEMBL;Acc:A0A125YJ01] | transcript_product=putative T-complex protein 1 subunit alpha | location=TGGT1_chrVIII:493249-499968(-) | protein_length=548 | sequence_SO=chromosome | SO=protein_coding_gene | is_pseudo=false	MALAIFGDRQSGQDVRTANAAAVQSIANILRSSLGPQGLDKMLVDDIGDMTITNDGATILKQLEVQHPAAKVLVELSDLQDKEVGDGTTSVVLLAAEFLRVGNQLVKEGVHPTAVIAGFKLAMKESVKFIQEHLTSRVDANNREVLMNVATTTISSKLIGTETAHFADLVVRAILSVKMITERGDVKYPVSSINIIKTHGKSMRESSLVEGYALKAGRAAQGMPQCVKNAKVALLDFNLRQHRMQLGVQIQVDNPEELEKIRQKEKDITAAKIQKILASGANVILTTQGIDDMAMKYFVEAGAIAVRRVDRKDLRRIAKITEGTVVLTMATLDGDEKFDASCLGTCEEVYEERIGDWDHLMFKGCKGGKAATVILRGANEYMLDEVDRSVHDALCAVSR…	0	132.92	48	22	49	22	548	59.2	6.25	135.96	22	0.976	1.018	0.997	0.97	0.947	0.988	0.967	0.962	0.964	0.986	-0.03	0.03	0	-0.04	-0.08	-0.02	-0.05	-0.06	-0.05	-0.02	0.633556	0.451021	0.934889	0.402171	0.16782	0.320678	0.153539	0.192472	0.354849	0.313925	0.996674	0.990049	0.992295
FALSE	High	Master Protein	TGGT1_216620-t26_1-p1	transcript=TGGT1_216620-t26_1 | gene=TGGT1_216620 | organism=Toxoplasma_gondii_GT1 | gene_product=EF hand domain-containing protein [Source:UniProtKB/TrEMBL;Acc:S7VUJ8] | transcript_product=EF hand domain-containing protein | location=TGGT1_chrXI:5927325-5957645(+) | protein_length=3700 | sequence_SO=chromosome | SO=protein_coding_gene | is_pseudo=false	MDTRLKPVRAREKRRSFFYDQLPPPSSGPSFQTGEDASSTPASRASTPSAAAAAAAAAEAAVHASEASSSSPRGRGSSCLSTSSALDGSSTLGSTKLLSFSPGSSGSAANSAYSGAAGVSLHPSRGSVGYDLGSRGAIASSASAAQAAAAAVASLQQEGGTGRERDSFRPSLRRVQSHSRLSIGAGEAALSGDRQWVGESGRRLARAALAATAAASLGSLRRGKESTLPGKRGGSAGSLLPVKEEDEEDERGRRCSEVESDNMKGSDDGHDPEDGAQFENQGQLGTDFMRNVPMVVGIPVYGVGTGVTLGSFLGLLLVGLFMTYLFTTWYAANILSVDLPLPASGLDATLHLRNCAVQFHPLPEEEKAAGRGSFVRMSAWLGFQEVPRHARSREQTLDD…	0	132.639	12	35	46	35	3700	411.7	6.32	109.47	35	1.016	0.979	0.987	1.035	1.051	1.013	1.022	0.996	1.047	1	0.02	-0.03	-0.02	0.05	0.07	0.02	0.03	-0.01	0.07	0	0.00405126	0.514915	0.69842	0.366731	0.268812	0.815196	0.730394	0.947509	0.417535	0.992197	0.996674	0.990049	0.980327
FALSE	High	Master Protein	TGGT1_205320-t26_1-p1	transcript=TGGT1_205320-t26_1 | gene=TGGT1_205320 | organism=Toxoplasma_gondii_GT1 | gene_product=hypothetical protein | transcript_product=hypothetical protein | location=TGGT1_chrVIIa:1385667-1389087(+) | protein_length=739 | sequence_SO=chromosome | SO=protein_coding_gene | is_pseudo=false	MAATVLATETQPRSTSEVSTEGEALPGARMAAVVSEESSQKVLREDDAGPSDSAPAVAWDKSEELKIEDNSEATSPQEGKGSEHEGGADAPASEAEAKGVKGGKIGAGRDEAGSSTERRKETHRDKETESATDAGTTVAPSDTQSNAHVPEKRNDLGADKREESSAGATVVTPEVGEPSGTKVDISRETCQKPVGSQVASDSLDTKSREAGDEERGSSQEQQRRKVSPLKDAETQEAPADSQRTTNPHSPSLDLRGEVEITESGETAEADQDTDIRAATEATDKSRATSSGEKTTAATGEKKLRRKKKEKKTVFESIPEPSKAHTGCRAPPLARKDSQTVFVSEPVSQSVAHFRACEKAPEKQHLQTVFESQRAEKSTAHARAGEKLADRKDGQTVFES…	0	132.448	54	25	53	25	739	80	5.48	148.97	25	0.976	0.911	0.934	1.002	0.978	0.913	0.936	0.981	0.889	0.922	-0.04	-0.13	-0.1	0	-0.03	-0.13	-0.1	-0.03	-0.17	-0.12	0.614667	0.326342	0.41644	0.955514	0.00837157	0.121524	0.165278	0.709813	0.132804	0.20092	0.996674	0.989773	0.973444
FALSE	High	Master Protein	TGGT1_229480-t26_1-p1	transcript=TGGT1_229480-t26_1 | gene=TGGT1_229480 | organism=Toxoplasma_gondii_GT1 | gene_product=Putative calcium binding protein [Source:UniProtKB/TrEMBL;Acc:S7V2K1] | transcript_product=putative calcium binding protein precursor | location=TGGT1_chrVIII:289042-291582(-) | protein_length=335 | sequence_SO=chromosome | SO=protein_coding_gene | is_pseudo=false	MAAFADRPTCRVSLGAVFLARELHRLRKSLPLCVFSLFLFSFAFSALSGAPSQFAEAAMPKLSGEKLAELMQMDVKDIKERMLALFDLIDTNQDNTIDTEEAKEWSAKLKNAMHQHQVRMEFQAIDKDNDGKVSLSELEATYVDSLDQKQLEQHKKEVEQRFKTVDKDNDGLLDLSEIRILMDPGKDEGLMKIEIEEILNAQDKNGDRKITVTEFIETEGTGSLNDVEKTELEKEFKSYDLNADGAIDVEELQQIIKDPHSHEIRMLLEEFTKDLKDGKVGREQWEKEFESFAVSMLTDNGEVLRFPEDYSGIEFPFKTAVPQVDVDDEDKHDEL	0	131.75	55	17	84	16	335	38.3	4.69	223.38	17	0.991	0.967	0.963	1.067	1.058	1.033	1.028	1.038	1.068	1.033	-0.01	-0.05	-0.05	0.09	0.08	0.05	0.04	0.05	0.1	0.05	0.0651768	0.158623	0.0700209	0.372994	0.410102	0.526349	0.612392	0.655638	0.477681	0.687135	0.996674	0.989773	0.971021
FALSE	High	Master Protein	TGGT1_204160-t26_1-p1	transcript=TGGT1_204160-t26_1 | gene=TGGT1_204160 | organism=Toxoplasma_gondii_GT1 | gene_product=GYF domain-containing protein [Source:UniProtKB/TrEMBL;Acc:S7W354] | transcript_product=GYF domain-containing protein | location=TGGT1_chrVIIa:1837535-1846323(-) | protein_length=1797 | sequence_SO=chromosome | SO=protein_coding_gene | is_pseudo=false	AAGGASGDPAQAGQEVKSGCTFFVQEKRGLRLFQVLTAPGAEKKGKKKLVELLHHADMQQATWSPCGRRLALVSQDQALVVFEHPTWTVSDVSKLWRGPAALASYCEKKAKSEGAAEGAGDEDEKTRDDASRPVLRDVQQFSLPLPERALAATSLAQPKYLQWSPLGTYLVAFYNVEKKRNGEEDSASQDHNVFVWDVAAREVVASFFVRRLVGSQWPLLKWRDDELFCCIASRNCIQVFSGHDLKKMLLRFPVPRVFNIEVAPCFSPELEQELLIGAFCPAAAPAGPALSNAQNANPQTAQFYVFHIPSVATAAATLASSCDVDWTLNPQARLQELLQTQRANLEKTEAAVKAALAQPAGVGAAEKKKGDSDSEEDASEGDLATSRSGVKPLAFYTVD…	0	131.072	22	34	55	34	1797	187.4	7.25	113.45	34	1.036	1.034	1.01	0.977	1.012	1.01	0.987	0.983	0.971	0.999	0.05	0.05	0.01	-0.03	0.02	0.01	-0.02	-0.03	-0.04	0	0.129276	0.146501	0.1271	0.396674	0.427586	0.456457	0.530964	0.528923	0.174302	0.982863	0.996674	0.989773	0.971021
FALSE	High	Master Protein	TGGT1_314410-t26_1-p1	transcript=TGGT1_314410-t26_1 | gene=TGGT1_314410 | organism=Toxoplasma_gondii_GT1 | gene_product=AAA domain-containing protein [Source:UniProtKB/TrEMBL;Acc:S7W963] | transcript_product=putative aquarius | location=TGGT1_chrXI:4032614-4045800(+) | protein_length=2247 | sequence_SO=chromosome | SO=protein_coding_gene | is_pseudo=false	MCAYGRRPPPPPPDGGRPATVGPAGPQILRVGASPPASSAPPPPPSACSHRPLVLRRVAPRPPSAPSPPVTANAASLLASSSCGEQAGSPLEKSERRERGARGEKDERGALRDLPSSRRQGVSHTFSKLGQSRWKRPPLVHPDAVGFFREQLAEQERLLKAAEATASELEKKAAHASDAADAAEGGAGKKGRHSVEKQLRLANKRVEAAKKRFEDARETLEAIAQVESAPNEDAEESEKSEGRGVRRQQEGFDPSLVTQIYDDLVDAHFPQQGLLTLEFSLFFENYLWPFFPVHGAETPADADSAEPTVSKAHLLLIVCMLLEKHRKNLPLWESFLNHPLLRDSDGRRTEAREETGGKKETGGEDVEMDGGASQERRNGERDAVAAELSADNMVRLPDE…	0	131.035	17	32	53	32	2247	250.5	6.21	132.12	32	0.993	1.021	0.998	1.002	0.995	1.022	0.999	1.005	1.011	0.999	-0.01	0.03	0	0	-0.01	0.03	0	0.01	0.02	0	0.863632	0.652974	0.962526	0.81438	0.874254	0.576231	0.985716	0.164835	0.828175	0.966798	0.996674	0.990049	0.992295
FALSE	High	Master Protein	TGGT1_219700-t26_1-p1	transcript=TGGT1_219700-t26_1 | gene=TGGT1_219700 | organism=Toxoplasma_gondii_GT1 | gene_product=MCM domain-containing protein [Source:UniProtKB/TrEMBL;Acc:S7V296] | transcript_product=putative DNA replication licensing factor MCM4 | location=TGGT1_chrXII:651605-660187(+) | protein_length=1014 | sequence_SO=chromosome | SO=protein_coding_gene | is_pseudo=false	MASPLRSRVSGPPDEHEVNAEDMEMQDEVTPLRGYAAQTEGGDEGRVSNFPGAESQGGRENMEAEHDTQGAEDNFQRSSPLSRRRRPVTQREAFPHGFSQHLSENAPQMSAATHRGLESSASEYGGTPLAVRRVRFARADLGDMGREFLLQDSDMQRLPELPKEVVDSNMERKFNEFFETFRVEDTEGILELSEEEKAISALANDAAYADAGCRSFYAIKLLQYMERRGAALMAGHSSQTGLSFDVSLQHLFLFDRQLYDAAVNAPQDAIAAFDAILRRKFADLRELHGCFSDEGAGHLGAEEVLLQQAPRLRLFSKPPALMDSARSLDPSVDLDRLVCLKGIVVRTSEVLPEMTMAAFRCQGQKRVDVNEYTACLQEVYECVVNGEALEPKKCQACGG…	0	130.731	29	23	49	23	1014	111.9	5.82	127.2	23	1.012	1.021	1.017	1.017	1.029	1.039	1.034	1.009	0.979	0.985	0.02	0.03	0.02	0.02	0.04	0.05	0.05	0.01	-0.03	-0.02	0.0358759	0.47394	0.213603	0.556369	0.396769	0.513219	0.419006	0.835261	0.159698	0.478342	0.996674	0.990049	0.971021
FALSE	High	Master Protein	TGGT1_269190-t26_1-p1	transcript=TGGT1_269190-t26_1 | gene=TGGT1_269190 | organism=Toxoplasma_gondii_GT1 | gene_product=Gp_dh_N domain-containing protein [Source:UniProtKB/TrEMBL;Acc:S7WDK9] | transcript_product=glyceraldehyde-3-phosphate dehydrogenase GAPDH2 | location=TGGT1_chrVIII:6001367-6005276(-) | protein_length=995 | sequence_SO=chromosome | SO=protein_coding_gene | is_pseudo=false	MSLYPRSSVRLRTRGLFFSSSLPLSHCLFLALFLFLSLDNFLPTSRSLNSFSVPAAALRLDGRDGPRQQTPETFSSSAFAEPSPESTPGACPLSSNDGELSLQQAEALLREEQTLATEYAQRAAGDVQQFTAAAQEAAARGDMSAAKELAAAAAASAAEAEDLAAYAQAVGETDPAVLRERAKEEAERFEQEERRQRGGDAASSGTCSESSDAAFAPEFSDLRDLFFGACDATVSPDDLPSVPEALEKLAGLESDVQARGDQLDEKEKVVAEYLVAAQEAAVRHEEASRAFEDAKRNKKENLAAAAEKAALEAAAEYADLTTAAQLVTEEAEQESAKALADAVAAGDLRFAINQKIVNEAGPEARGKVPRALLAPKHVRISDPAAGRVLKIFFHNNFAP…	0	130.389	26	23	58	22	995	105.1	5.05	144.57	23	0.997	0.985	0.987	1.013	1.01	0.998	0.999	1.001	0.993	0.99	0	-0.02	-0.02	0.02	0.01	0	0	0	-0.01	-0.02	0.650918	0.618423	0.732144	0.103299	0.389313	0.951039	0.989814	0.950311	0.685134	0.139336	0.996674	0.990049	0.980327
FALSE	High	Master Protein	TGGT1_217890-t26_1-p1	transcript=TGGT1_217890-t26_1 | gene=TGGT1_217890 | organism=Toxoplasma_gondii_GT1 | gene_product=Peroxiredoxin [Source:UniProtKB/TrEMBL;Acc:A0A125YNG7] | transcript_product=putative alkyl hydroperoxide reductase/ Thiol specific antioxidant/ Mal allergen | location=TGGT1_chrXII:2143499-2144089(-) | protein_length=196 | sequence_SO=chromosome | SO=protein_coding_gene | is_pseudo=false	MPAPMVSQPAPAFEAEAVMADGSFGKISLSQFKGKKYVVLFFYPFDFTFVCPSEILAFHRLHGEFEKRGCQLLGVSVDSKFVHNAWRNVELKDGGIGKISFPLLADVSHKMAEDYGVLHPEGMAFRGLFLIDKEGVLQHCVINNLPLGRSADEALRMLDALQHVEQYGEVCPANWKKGDKAMKPTAEGVKEYLGSK	0	130.179	58	11	61	11	196	21.7	6.87	194.07	11	1.013	1.005	1.01	0.978	0.991	0.983	0.988	1.005	0.984	0.992	0.02	0.01	0.01	-0.03	-0.01	-0.02	-0.02	0.01	-0.02	-0.01	0.441247	0.624219	0.0985186	0.292373	0.0100752	0.530987	0.506743	0.832215	0.538786	0.318945	0.996674	0.990049	0.971021
FALSE	High	Master Protein	TGGT1_232250-t26_1-p1	transcript=TGGT1_232250-t26_1 | gene=TGGT1_232250 | organism=Toxoplasma_gondii_GT1 | gene_product=Catalase [Source:UniProtKB/TrEMBL;Acc:S7V3B9] | transcript_product=catalase | location=TGGT1_chrVIII:1969434-1975537(-) | protein_length=502 | sequence_SO=chromosome | SO=protein_coding_gene | is_pseudo=false	MTQVPPVTFQQYGPVITTSAGNPVDDNQNSVTAGPYGPAILSNFHLIDKLAHFDRERIPERVVHAKGGGAFGYFEVTHDITRFCKAKLFEKIGKRTPVFARFSTVAGESGSADTRRDPRGFALKFYTEEGNWDMVGNNTPIFFVRDAIKFPDFIHTQKRHPQTHLHDPNMVWDFFSLVPESVHQVTFLYTDRGTPDGFRHMNGYGSHTFKFINKDNEAFYVKWHFKTNQGIKNLNRQRAKELESEDPDYAVRDLFNAIAKREFPSWTFCIQVMPLKDAETYKWNVFDVTKVWPHGDYPLIPVGKLVLDRNPENYFQDVEQAAFAPAHMVPGIEPSEDRMLQGRMFSYIDTHRHRLGANYHQIPVNRPWNARGGDYSVRDGPMCVDGNKGSQLNYEPNSV…	0	129.758	42	20	57	20	502	57.2	7.2	160.85	20	0.989	0.926	0.961	1.094	1.082	1.013	1.052	1.054	1.063	1.092	-0.02	-0.11	-0.06	0.13	0.11	0.02	0.07	0.08	0.09	0.13	0.921079	0.429323	0.274157	0.457896	0.0935699	0.588284	0.557803	0.340294	0.377022	0.211302	0.996674	0.990049	0.971021
FALSE	High	Master Protein	P35527	Keratin, type I cytoskeletal 9 OS=Homo sapiens (Human) OX=9606 GN=KRT9 PE=1 SV=3	MSCRQFSSSYLSRSGGGGGGGLGSGGSIRSSYSRFSSSGGGGGGGRFSSSSGYGGGSSRVCGRGGGGSFGYSYGGGSGGGFSASSLGGGFGGGSRGFGGASGGGYSSSGGFGGGFGGGSGGGFGGGYGSGFGGFGGFGGGAGGGDGGILTANEKSTMQELNSRLASYLDKVQALEEANNDLENKIQDWYDKKGPAAIQKNYSPYYNTIDDLKDQIVDLTVGNNKTLLDIDNTRMTLDDFRIKFEMEQNLRQGVDADINGLRQVLDNLTMEKSDLEMQYETLQEELMALKKNHKEEMSQLTGQNSGDVNVEINVAPGKDLTKTLNDMRQEYEQLIAKNRKDIENQYETQITQIEHEVSSSGQEVQSSAKEVTQLRHGVQELEIELQSQLSKKAALEKSLE…	0	129.185	39	21	61	20	623	62	5.24	153.59	21	0.591	0.759	1.148	0.845	0.499	0.642	0.97	0.788	0.711	0.47	-0.76	-0.4	0.2	-0.24	-1	-0.64	-0.04	-0.34	-0.49	-1.09	0.152957	0.63161	0.708885	0.850083	0.438945	0.359391	0.954561	0.824124	0.7278	0.293605	0.996674	0.990049	0.980327
FALSE	High	Master Protein	TGGT1_300100-t26_1-p1	transcript=TGGT1_300100-t26_1 | gene=TGGT1_300100 | organism=Toxoplasma_gondii_GT1 | gene_product=Rhoptry neck protein RON2 [Source:UniProtKB/TrEMBL;Acc:S7UGV9] | transcript_product=rhoptry neck protein RON2 | location=TGGT1_chrXII:175560-186129(-) | protein_length=1479 | sequence_SO=chromosome | SO=protein_coding_gene | is_pseudo=false	MTKRAGLPLGRAFLVLILLSAADSLFFSSFPRSALQLFSSVLFTDAAEPDSDATPGLRPQPSPRTFRPTGYQRIEVKTVDEELPEDLKVYTASTRGSSSRTFEVRNAGGRQEGFTLSVLTAGGPLPHGSWSWSGTPPEVQTTGGSQISFGWVPDTETPSLPERNLLQLKRMLRDEGLIEAVQLRAAEKGCPVAVLHNLRQLPVNFREVLHEEYESRSNPAKMYEVANSYVQQRGSDAARWSVSQSVELSLLEMHATSTTDPRGSSAVPSFLETGPQVRVAMTDAVPSGIRVYATPPAPRPVPVQSNQTEKERSPTSKRLVGMQLGLYLICKLAALFGHPTLFLNPYYTEQQLLEAVAQALGIAPPHRGDFENEGNEAQATANQHNGSADQLLAAIEIFR…	0	128.186	21	29	79	29	1479	166.3	9.58	174.28	29	1.003	1.001	1.008	0.981	0.984	0.982	0.989	0.979	0.986	0.991	0	0	0.01	-0.03	-0.02	-0.03	-0.02	-0.03	-0.02	-0.01	0.518708	0.801154	0.341603	0.42147	0.53221	0.512811	0.469361	0.446792	0.52969	0.460266	0.996674	0.995152	0.971021
FALSE	High	Master Protein	TGGT1_236040-t26_1-p1	transcript=TGGT1_236040-t26_1 | gene=TGGT1_236040 | organism=Toxoplasma_gondii_GT1 | gene_product=Fructose-bisphosphate aldolase [Source:UniProtKB/TrEMBL;Acc:A0A125YGE5] | transcript_product=fructose-1,6-bisphosphate aldolase | location=TGGT1_chrX:5139351-5141389(+) | protein_length=433 | sequence_SO=chromosome | SO=protein_coding_gene | is_pseudo=false	MLCIVERIAMPTRGVNPSAANGKLPPRTRSATGCRVYIHPMVKFISLLFAVFYARFFLLFCVRIQSTFPTMSGYGLPISQEVAKELAENARKIAAPGKGILAADESTGTIKKRFDSIGVENTEANRAFYRDLLFSTKGLGQYISGAILFEETLYQKSPSGVPMVDLLKAEGIIPGIKVDKGLETLPLTDDEKATMGLDGLSERCKKYYEAGARFAKWRAVLSIDPAKGKPTNLSITEVAHGLARYAAICQANRLVPIVEPEILTDGSHDITVCAEVTERVLAAVFKALNDHHVLLEGALLKPNMVTHGSDCPKPASHEEIAFYTVRSLKRTVPPALPGVMFLSGGQSEEDASLNLNEMNKMGPHPFQLSFSYGRALQASCLKAWKGVPENKAKAQQVLM…	0	127.636	37	19	103	19	433	46.9	8.82	218.07	19	1.008	0.997	1.002	0.987	0.995	0.984	0.988	1.002	0.984	0.996	0.01	0	0	-0.02	-0.01	-0.02	-0.02	0	-0.02	-0.01	0.584604	0.865691	0.937871	0.705571	0.800611	0.47321	0.398422	0.917627	0.58837	0.8187	0.996674	0.997616	0.992295
FALSE	High	Master Protein	TGGT1_233460-t26_1-p1	transcript=TGGT1_233460-t26_1 | gene=TGGT1_233460 | organism=Toxoplasma_gondii_GT1 | gene_product=SAG-related sequence SRS29B [Source:UniProtKB/TrEMBL;Acc:A0A125YG48] | transcript_product=SAG-related sequence SRS29B | location=TGGT1_chrVIII:2660455-2661465(+) | protein_length=336 | sequence_SO=chromosome | SO=protein_coding_gene | is_pseudo=false	MSVSLHHFIISSGFLTSMFPKAVRRAVTAGVFAAPTLMSFLRCGVMASDPPLVANQVVTCPDKKSTAAVILTPTENHFTLKCPKTALTEPPTLAYSPNRQICPAGTTSSCTSKAVTLSSLIPEAEDSWWTGDSASLDTAGIKLTVPIEKFPVTTQTFVVGCIKGDDAQSCMVTVTVQARASSVVNNVARCSYGADSTLGPVKLSAEGPTTMTLVCGKDGVKVPQDNNQYCSGTTLTGCNEKSFKDILPKLTENPWQGNASSDKGATLTIKKEAFPAESKSVIIGCTGGSPEKHHCTVKLEFAGAAGSAKSAAGTASHVSIFAMVIGLIGSIAACVA	0	127.21	63	18	174	18	336	34.8	8.02	504.76	18	1.007	1.007	1.007	1.029	1.036	1.036	1.036	1.033	1.031	1.032	0.01	0.01	0.01	0.04	0.05	0.05	0.05	0.05	0.04	0.05	0.185806	0.53637	0.814082	0.130153	0.0683047	0.0327348	0.298106	0.213043	0.0712325	0.234377	0.996674	0.990049	0.984106
FALSE	High	Master Protein	TGGT1_224350A-t26_1-p1	transcript=TGGT1_224350A-t26_1 | gene=TGGT1_224350A | organism=Toxoplasma_gondii_GT1 | gene_product=Putative aminopeptidase N [Source:UniProtKB/TrEMBL;Acc:S7WBR7] | transcript_product=putative aminopeptidase N | location=TGGT1_chrX:2967893-2975546(-) | protein_length=1219 | sequence_SO=chromosome | SO=protein_coding_gene | is_pseudo=false	MVWRRTKAKGWRPSAGVERKKSTADRDTRGRHLVRSGASSLGGCAACELWRGKTDREAEDRRIEPYALQKSDKSCVQTLLRAGASVKKEKTRPNHGEGDTSPTASGSACVRAQRGVQAASSRLAHQESAGSLPLISFFSSGAANATASTSLWQRETPETALETPPFLLSAASRGCPRFGCMDTSQVCQRGLDLRPSCTSKKVDFRRFAPAFCGQNATAELFSSEGKCEKLNRVPPRPPQAAADASAHRLASVHVPFSRVSSPCLQQLFPFDASASSPSRFASLLAATASTELPSASPALGEATVPKRRSPFAPSLSRHSSVFLLSPKVTLLALLFCLLAFCAFSRGLSLSPAETSPLAPPATRMRPSTSQLCLRSALPPSLRGKDWCSHAQQRRLDPLA…	0	126.996	25	29	70	27	1219	134.3	7.72	170.02	29	0.956	0.986	1.008	1.002	0.958	0.988	1.01	0.996	0.981	0.984	-0.06	-0.02	0.01	0	-0.06	-0.02	0.01	-0.01	-0.03	-0.02	0.0992912	0.631241	0.20745	0.933796	0.125513	0.796402	0.583049	0.825017	0.0990177	0.498163	0.996674	0.990049	0.971021
FALSE	High	Master Protein	TGGT1_264860-t26_1-p1	transcript=TGGT1_264860-t26_1 | gene=TGGT1_264860 | organism=Toxoplasma_gondii_GT1 | gene_product=RING-type domain-containing protein [Source:UniProtKB/TrEMBL;Acc:S7VP61] | transcript_product=zinc finger, C3HC4 type (RING finger) domain-containing protein | location=TGGT1_chrIX:1768340-1781509(-) | protein_length=3868 | sequence_SO=chromosome | SO=protein_coding_gene | is_pseudo=false	MAPNEKIPATSASRGKQLTGKQLKRQLRGEAASSSRAAQLVSSLSPSVDPGAPGGATQLAAIFAHFAQASTASSAPGEDQGLSASLAASSSRSPSSVAPATSSSGCAKAPGGAQRSRYPETASEAPSSVAAGRGALRQADAGEQQQIDDIHRALVKLTKRDSVTRLKGLQELEFLLHASRGSASPSSDGFSPSSDGLNPPSPVSSASSPVSSASSPVSSASSPAFSVSASSSSSSSSHPASASSPDLSSLSPATASSAASAAGQTLSDEAFLVIAEAILPQFVYVYGRLAVWDSERRIRAGVNRCLSLIASRARKLLGPHLRAMLPLWWISSHDDAAEVALAAQEALDFAFPPFAASSSAAAPGAASSSPTLFFRGFVGHRARLAAAFDHCREALFSEY…	0	126.835	11	34	41	34	3868	413.9	6.3	84.43	34	0.961	1.003	0.931	1.029	0.989	1.031	0.957	0.984	0.987	1.017	-0.06	0	-0.1	0.04	-0.02	0.04	-0.06	-0.02	-0.02	0.02	0.0525299	0.924478	0.0401781	0.0127077	0.20889	0.373398	0.0742313	0.778202	0.322203	0.712465	0.996674	0.998909	0.971021
FALSE	High	Master Protein	TGGT1_202530-t26_1-p1	transcript=TGGT1_202530-t26_1 | gene=TGGT1_202530 | organism=Toxoplasma_gondii_GT1 | gene_product=AA_TRNA_LIGASE_II domain-containing protein [Source:UniProtKB/TrEMBL;Acc:S7WAH7] | transcript_product=aspartate-tRNA ligase | location=TGGT1_chrVIIa:3153086-3158845(-) | protein_length=773 | sequence_SO=chromosome | SO=protein_coding_gene | is_pseudo=false	MERDGLCSLCMRFPPFRFAPILFIFSLFLIDTEEVFLPQQRPASRFFLSTSAPFSPLRSSGVSELSSSPPSAPLVPWPSSLSASFLSSGAACRRSPFRSSAFAAAEPGDRCFGRNKENWRMRVLPSSSLCFTSVSPSSARAPVTSRCFSSLPTKALKPSVSFIRVSRFRSSSALLKPRSLPLSSARCSSLAGHSAEVDRRMPSAVSVSSSPTTPSLLRAFSCLSSLPPAMPEETPKREEAAPSVAEVAEAPVSKKAQKKAEKEAAKEAAKAAKREALEAEQRAAQAVMNKQVEDLEKDAFGYLPVIDSRMRTNREWIPVDQLRNHVGKTVWVRGRIQESRGKGSVGFLMLRERQETVQGVLDAKRGNTKDMIKWTMSLPLESVVDLQGTVVEPEVEIQS…	0	126.709	36	26	59	26	773	86.7	8.22	160.62	26	0.998	0.998	0.996	1.008	1.006	1.006	1.004	0.997	1.008	1.011	0	0	-0.01	0.01	0.01	0.01	0.01	0	0.01	0.02	0.0524365	0.818532	0.764327	0.664548	0.752735	0.841313	0.899488	0.836558	0.582359	0.437628	0.996674	0.995152	0.983537
FALSE	High	Master Protein	TGGT1_206670-t26_1-p1	transcript=TGGT1_206670-t26_1 | gene=TGGT1_206670 | organism=Toxoplasma_gondii_GT1 | gene_product=hypothetical protein | transcript_product=hypothetical protein | location=TGGT1_chrVIIa:705099-714174(-) | protein_length=2072 | sequence_SO=chromosome | SO=protein_coding_gene | is_pseudo=false	MEEEEAPPEGRETPCGGAGELKFESAVVHASVLESEGGEDREEEEREVEYGTGLHEGRLSPGQDQGEVLDEGGDADFADPEDEEKLDFSNEEPRDEGELSLDAQPLSGGEEELEGAQEDAGLDGGDGDPESTSGDAEPPPHSQEEASSTLPDTGEGRDGGFLRGSKRRARSSASSPRSVVSAERVSAALAEIANLCEPDSDEEGEISEDEVPFCRVTPQNPSFRSRTLEFLNLPPNLTHIALQEALSRVGEVEEVVSSRFASGQPDAGQGSDSSRRRASWLVRFRRADDAAAVRKSFDGKVFGKCMVQVLFARDTSRNAQNRRDNNLLSPDGASGKRQLGKGAAGANAGNVQNLRGRQSPPAPGASGPGTGAQGPGVGGAVAGCMGPGSGAGGGPPPVG…	0	125.959	18	30	39	30	2072	218.3	5.41	95.82	30	0.945	0.97	0.928	1.046	0.988	1.014	0.97	1.013	0.964	1.009	-0.08	-0.04	-0.11	0.06	-0.02	0.02	-0.04	0.02	-0.05	0.01	0.0335735	0.118261	0.0680453	0.183263	0.43374	0.604673	0.106102	0.70635	0.583046	0.605794	0.996674	0.989773	0.971021
FALSE	High	Master Protein	P60709	Actin, cytoplasmic 1 OS=Homo sapiens (Human) OX=9606 GN=ACTB PE=1 SV=1	MDDDIAALVVDNGSGMCKAGFAGDDAPRAVFPSIVGRPRHQGVMVGMGQKDSYVGDEAQSKRGILTLKYPIEHGIVTNWDDMEKIWHHTFYNELRVAPEEHPVLLTEAPLNPKANREKMTQIMFETFNTPAMYVAIQAVLSLYASGRTTGIVMDSGDGVTHTVPIYEGYALPHAILRLDLAGRDLTDYLMKILTERGYSFTTTAEREIVRDIKEKLCYVALDFEQEMATAASSSSLEKSYELPDGQVITIGNERFRCPEALFQPSFLGMESCGIHETTFNSIMKCDVDIRKDLYANTVLSGGTTMYPGIADRMQKEITALAPSTMKIKIIAPPERKYSVWIGGSILASLSTFQQMWISKQEYDESGPSIVHRKCF	0	125.498	42	12	111	3	375	41.7	5.48	322.54	12	1.037	1.021	1.047	1.004	1.041	1.025	1.051	1.077	1	1.029	0.05	0.03	0.07	0.01	0.06	0.04	0.07	0.11	0	0.04	0.29669	0.639098	0.392669	0.91629	0.552814	0.757945	0.0421403	0.0857953	0.998484	0.597474	0.996674	0.990049	0.971021
FALSE	High	Master Protein	TGGT1_291890-t26_1-p1	transcript=TGGT1_291890-t26_1 | gene=TGGT1_291890 | organism=Toxoplasma_gondii_GT1 | gene_product=TgMIC1 domain-containing protein [Source:UniProtKB/TrEMBL;Acc:S7VXI3] | transcript_product=microneme protein MIC1 | location=TGGT1_chrIX:4200849-4203191(-) | protein_length=456 | sequence_SO=chromosome | SO=protein_coding_gene | is_pseudo=false	MGQALFLTVLLPVLFGVGPEAYGEASHSHSPASGRYIQQMLDQRCQEIAAELCQSGLRKMCVPSSRIVARNAVGITHQNTLQWRCFDTASLLESNQENNGVNCVDDCGHTIPCPGGVHRQNSNHATRHEILSKLVEEGVQRFCSPYQASANKYCNDKFPGTIARRSKGFGNNVEVAWRCYEKASLLYSVYAECASNCGTTWYCPGGRRGTSTELDKRHYTEEEGIRQAIGSVDSPCSEVEVCLPKDENPPLCLDESGQISRTGGGPPSQPPEMQQPADRSDERGGGKEQSPGGEAQPDHPTKGGNIDLPEKSTSPEKTPKTEIHGDSTKATLEEGQQLTLTFISTKLDVAVGSCHSLVANFLDGFLKFQTGSNSAFDVVEVEEPAGPAVLTIGLGHKGR…	0	124.865	43	17	119	17	456	48.6	5.34	328.71	17	1.033	1.027	1.025	0.987	1.019	1.014	1.011	0.982	0.956	0.967	0.05	0.04	0.04	-0.02	0.03	0.02	0.02	-0.03	-0.06	-0.05	0.239016	0.547317	0.29201	0.87202	0.774786	0.743526	0.864105	0.455432	0.313948	0.303102	0.996674	0.990049	0.971021
FALSE	High	Master Protein	TGGT1_314100-t26_1-p1	transcript=TGGT1_314100-t26_1 | gene=TGGT1_314100 | organism=Toxoplasma_gondii_GT1 | gene_product=TPR_REGION domain-containing protein [Source:UniProtKB/TrEMBL;Acc:S7W2F0] | transcript_product=tetratricopeptide repeat-containing protein | location=TGGT1_chrXI:3881643-3887836(+) | protein_length=580 | sequence_SO=chromosome | SO=protein_coding_gene | is_pseudo=false	MEANTSENSKLSESPVANAEESRVEDAAMSDSLSSVQTDDEKAKDEDEETVDGTPEERMTLALSCKDAGNDVFKSGDVSAAKAKYTEGLKQLKDLDFPDAKRLRVALNSNVAMCCIKTQEWSAAIAAANAVLQEEPENVKALYRRGVARSAFGFYAEAKADLLQVARLDPKNADARKELEKVKERIAKHNAEKKKAFSGLFDRAAGMYADREEQMRQKRLQEEEEEKRRQEMWEKEMEERREKGEEEISFADWKEERRKVEEEKKDKQRREQTSSPSSSPSTTASSGRTSKKTGGVESLELDEEDEKIINETKKMGYCYFRRDLTEEEKKLNAQHRPTRIEPAANAASSGASAGSSPVASNAENSAGGAAKQSGVSSWNSAGTTYEEKDVSEWAKKRFE…	0	122.736	44	24	58	24	580	64.2	5.38	153.69	24	0.979	1.004	1.016	0.993	0.972	0.996	1.009	0.983	0.98	0.961	-0.03	0.01	0.02	-0.01	-0.04	-0.01	0.01	-0.02	-0.03	-0.06	0.182832	0.574027	0.598801	0.14687	0.0997012	0.663564	0.77318	0.388684	0.450376	0.386628	0.996674	0.990049	0.975418
FALSE	High	Master Protein	TGGT1_315270-t26_1-p1	transcript=TGGT1_315270-t26_1 | gene=TGGT1_315270 | organism=Toxoplasma_gondii_GT1 | gene_product=hypothetical protein | transcript_product=hypothetical protein | location=TGGT1_chrXI:4558433-4565813(-) | protein_length=780 | sequence_SO=chromosome | SO=protein_coding_gene | is_pseudo=false	MAPKKKGISVNLRDLQREMGVGVTLLPSAPKPVDEAALAAAEKERERERKLGPGGGRWADRMDDSDDDEWRRDGEGATFGPGGPGARSMEGMRREGGRMRQEVELPDEPWRRSAPLPSRDQEGGERIGRGRGVEEDADLGVLRSTAKANTPPAGGSGDLGRGGRGETAAIRQQEEDLDFAEVRKATPQREGSFPGHRAPREDDEDLDFAAVRDRTRGGMGSGAESVAPSSDSRPEHLRSLRSRLKKVERENVSPENGASPSPPSSRPLESQSALESKPGRYVPPSKRSPAVGKDEKGSAARGTSGASAPVQNDRLAAFLEPDSPRKEPATAPRPAAGGASVTGAAPGACTPSSSSPGEREVSAAFSSPGEKDDLQASSPETAKAGGGARFVPKWKQRME…	0	122.515	33	21	51	21	780	84.5	5.24	135.12	21	1	1.027	1.039	0.998	0.998	1.024	1.036	1.03	1.033	1.008	0	0.04	0.05	0	0	0.03	0.05	0.04	0.05	0.01	0.999185	0.0620715	0.347492	0.350406	0.962311	0.0300885	0.383511	0.248852	0.384185	0.638666	0.999185	0.989773	0.971021
FALSE	High	Master Protein	TGGT1_250820-t26_1-p1	transcript=TGGT1_250820-t26_1 | gene=TGGT1_250820 | organism=Toxoplasma_gondii_GT1 | gene_product=hypothetical protein | transcript_product=hypothetical protein | location=TGGT1_chrXII:5170586-5175102(+) | protein_length=1156 | sequence_SO=chromosome | SO=protein_coding_gene | is_pseudo=false	MPKAYARAERGSTSQKARDQKVLRPPALDVSRVSGKISDRSERSASALMTPQSRNSPSVSAPSTPARSSKGHSDAGKARRGLQESARSRSPSRKVTTGKGKKLEHASMDGQQGELSRAADQATHSQLVTLDFERGVAEAPRRALKGQTAGVQVNHHGSSLQKALDNLTPRKAALAVELERAQLEVASLKRLVTEVSSGKTPLAVPAELFYQLSLACLSGNTRVAAKPHLSHREDVGKSSPKAAGHGRQAGKGREGGNEGEKRDAALSADQEEAVSGLRSGPSSVDWGEVEQRIRVDVEGEAPMVWKDVYRLRQGAKPEHISSSCSGVGAGETKKGALGDHSQISVDIPSGDEAAAWHPKGNKTEQRMLYSPREGGFSLFLPDTVNAAMGHPYRRSHSCT…	0	121.874	29	30	51	30	1156	120.8	9.25	141.25	30	1.012	0.998	1.018	0.971	0.983	0.969	0.988	0.951	0.976	0.992	0.02	0	0.03	-0.04	-0.02	-0.05	-0.02	-0.07	-0.04	-0.01	0.645121	0.343122	0.629309	0.244341	0.27982	0.204594	0.56477	0.0396456	0.0284672	0.506138	0.996674	0.990049	0.975418
FALSE	High	Master Protein	TGGT1_240650-t26_1-p1	transcript=TGGT1_240650-t26_1 | gene=TGGT1_240650 | organism=Toxoplasma_gondii_GT1 | gene_product=WD_REPEATS_REGION domain-containing protein [Source:UniProtKB/TrEMBL;Acc:A0A125YGM0] | transcript_product=putative coatomer protein complex, subunit alpha | location=TGGT1_chrVI:1326973-1343296(-) | protein_length=1300 | sequence_SO=chromosome | SO=protein_coding_gene | is_pseudo=false	MSKMFVKCETKSSRVKGLAFHPSLQWILAALHNGTIQLWDYRIGSLIDKFEEHEGPVRGIDFHSSQPLFVSGGDDYKVKLWSLTTRKCIFTFLGHLDYLRTVFFHHIYPWVLSASDDQTVRIWNWQSRACIAVLTGHNHYVMSALFHPFEDLVVSASLDQTIRVWDTSGLREKTGGAGGAHALGTGSFSAPGTSRPHAEMFTANDAVCKFVLEGHERGVNWAAFHPSLPLIASAADDRLIKLWRYNDSKAWEVDTLRGHFNNVSCLVFHPQRELLISNSEDRTIRVWDVSKRIGVHTFRRENDRFWIIAAHRSSSALAVGHDSGMVVFKLHTERPPSALHSRFHFYYVRDRVLCFRDLLLSLQLFQKSGEGGRNAAGAHAVAEVSICEVRRPANAMTAG…	0	121.569	23	28	60	28	1300	142.9	7.25	134.93	28	0.986	1.015	1.01	0.995	0.98	1.01	1.005	1.009	0.995	0.979	-0.02	0.02	0.01	-0.01	-0.03	0.01	0.01	0.01	-0.01	-0.03	0.366523	0.437145	0.154396	0.755631	0.544689	0.769308	0.752404	0.8531	0.818742	0.426404	0.996674	0.990049	0.971021
FALSE	High	Master Protein	P15144	Aminopeptidase N OS=Homo sapiens (Human) OX=9606 GN=ANPEP PE=1 SV=4	MAKGFYISKSLGILGILLGVAAVCTIIALSVVYSQEKNKNANSSPVASTTPSASATTNPASATTLDQSKAWNRYRLPNTLKPDSYRVTLRPYLTPNDRGLYVFKGSSTVRFTCKEATDVIIIHSKKLNYTLSQGHRVVLRGVGGSQPPDIDKTELVEPTEYLVVHLKGSLVKDSQYEMDSEFEGELADDLAGFYRSEYMEGNVRKVVATTQMQAADARKSFPCFDEPAMKAEFNITLIHPKDLTALSNMLPKGPSTPLPEDPNWNVTEFHTTPKMSTYLLAFIVSEFDYVEKQASNGVLIRIWARPSAIAAGHGDYALNVTGPILNFFAGHYDTPYPLPKSDQIGLPDFNAGAMENWGLVTYRENSLLFDPLSSSSSNKERVVTVIAHELAHQWFGNLV…	0	121.535	26	23	54	23	967	109.5	5.48	133.92	23	1.018	1.043	1.034	0.976	0.993	1.018	1.01	1.051	1.036	1.032	0.03	0.06	0.05	-0.03	-0.01	0.03	0.01	0.07	0.05	0.05	0.114052	0.161692	0.00295059	0.566616	0.87116	0.51633	0.802436	0.187173	0.312368	0.45778	0.996674	0.989773	0.971021
FALSE	High	Master Protein	TGGT1_232340-t26_1-p1	transcript=TGGT1_232340-t26_1 | gene=TGGT1_232340 | organism=Toxoplasma_gondii_GT1 | gene_product=PPM-type phosphatase domain-containing protein [Source:UniProtKB/TrEMBL;Acc:S7WBN1] | transcript_product=protein phosphatase 2C domain-containing protein | location=TGGT1_chrVIII:2014510-2019343(-) | protein_length=547 | sequence_SO=chromosome | SO=protein_coding_gene | is_pseudo=false	MGAYLAKPKTQKVSEEGGEEGRTITCFGAASMQGWRQTMEDAHIATPSLRTASPAAAKTLEELAQSGSRECKEALPAFAQDMSLYAVFDGHASNAVSCWVSDHYTKVFLDRLEQIEADAKKGVSPAGLAESLSRQLPDESIFSLRNAVLCEALQQSFLDVDEQMKREDNRQELKKYFEQGQLEQRDNETYIQRYLNDGGDVRLVEMDGQKYLQFVPRTSEDEEDGEGASREKAEGDGQDETEKEATAKEEASGAVNGEEKRTAEAETVNKLTRLNSTKIEEEDSEKKPESEEEKDTEKEKEEETEKEEEDKAGERPLFAHPSTPEGSGATAVVVLVVGGEDPVIITANAGDSRGVICRGGKAFPLSHDHKPTNPDEKKRIVAAGGYVTNGRVDGNLNLS…	0	121.023	51	29	66	29	547	60	4.65	145.94	29	0.983	0.993	0.98	1.025	1.009	1.019	1.004	0.991	1.005	1.011	-0.02	-0.01	-0.03	0.04	0.01	0.03	0.01	-0.01	0.01	0.02	0.115122	0.825262	0.113542	0.124783	0.48273	0.502852	0.175478	0.751784	0.691394	0.4674	0.996674	0.995152	0.971021
FALSE	High	Master Protein	TGGT1_225125-t26_1-p1	transcript=TGGT1_225125-t26_1 | gene=TGGT1_225125 | organism=Toxoplasma_gondii_GT1 | gene_product=Pre-rRNA processing protein [Source:UniProtKB/TrEMBL;Acc:S7W597] | transcript_product=pre-rRNA processing protein | location=TGGT1_chrX:2378306-2392984(+) | protein_length=2871 | sequence_SO=chromosome | SO=protein_coding_gene | is_pseudo=false	MAQTQRGRPGFLSVNAAFSDAADFPRAAPRRSSAKSGGASQAASRRAPAQYAPFASSFPSSPAAFSPAAVAGEVRRREKLAQRARGAARPEPDSEVCAPQSGEHLERLARPVEAETVSPGSLLLGIVAEVHTSELIVHLPFGMMGCVPRSQTQEESTPSFASARVCGEGLGDASEVPGARDGKPHAQTFLPLSRSHYVGQVVQTVVLGGGKEGREEEGDWRRHSQNSRVLLLSLRPSLFNAGLSANSLAPGMVVPATVAAVEEHGYMLSFGVDSLSGFLPFAELATGSAAAPERNVDTDAALPLHSVLSVRVAKVSKAAKVIICALPGEQETAETLETPEAPRGESRKKQKTTAADSREAASSGGQSPGNSKRTPEVPASLKTSLDWSSIKPGLLVQAK…	0	120.807	14	37	49	37	2871	310.5	8.07	100.47	37	1.001	1.01	1.028	0.961	0.962	0.971	0.988	0.948	0.949	0.962	0	0.01	0.04	-0.06	-0.06	-0.04	-0.02	-0.08	-0.08	-0.06	0.0668045	0.903652	0.116588	0.246277	0.252042	0.643941	0.479701	0.237795	0.0148123	0.201524	0.996674	0.998909	0.971021
FALSE	High	Master Protein	TGGT1_280600-t26_1-p1	transcript=TGGT1_280600-t26_1 | gene=TGGT1_280600 | organism=Toxoplasma_gondii_GT1 | gene_product=AA_TRNA_LIGASE_II domain-containing protein [Source:UniProtKB/TrEMBL;Acc:S7W2N3] | transcript_product=putative histidyl-tRNA synthetase (HisRS) | location=TGGT1_chrVIIa:251998-256202(-) | protein_length=1252 | sequence_SO=chromosome | SO=protein_coding_gene | is_pseudo=false	MLPSKIRSSRGLSRCLYSPHHVHPVSQKGILWFPCISPARRSGQGLGASVFGSFVPRSAGIRFCSARYLDWWQSPTASSASLHGRTFPPCPRESRRRCFPGYPNSLWLLLCQPFVRGVCTLPSTKTFAAGGLSTGKMASSVPPPPLGSRPLTLDELSAYTFGNFACVVDPAVVPKLSREFGRRFPQGGNTECFSSLNLPALPEGAPVLHSTAVRATAVLRIVSLLNNAGGVRTGILTSLCSLLNEASPPVTKLPRHPLPLASSVPLAPFSTYPSALQYMLNGAVEHLAKADPSAPQAISIDEAAAFCGGCSEVAGRLFVASRLLSVLVTLQDCNAALLTEALLVPTDFFSHQQRRLPPIKGIEKSATNIGNLLHDSKLPASSRKSVAEVNATCPSLALL…	0	120.784	24	28	64	28	1252	134.8	7.55	143.63	28	1.006	0.996	1.017	1.003	1.009	0.998	1.019	0.99	0.989	1.01	0.01	-0.01	0.02	0	0.01	0	0.03	-0.01	-0.02	0.01	0.439879	0.859951	0.678247	0.823898	0.287514	0.896369	0.516203	0.469838	0.798194	0.298504	0.996674	0.997431	0.980327
FALSE	High	Master Protein	TGGT1_216860-t26_1-p1	transcript=TGGT1_216860-t26_1 | gene=TGGT1_216860 | organism=Toxoplasma_gondii_GT1 | gene_product=DEAD (Asp-Glu-Ala-Asp) box polypeptide DDX39 [Source:UniProtKB/TrEMBL;Acc:A0A125YNR1] | transcript_product=DEAD (Asp-Glu-Ala-Asp) box polypeptide DDX39 | location=TGGT1_chrXI:5764687-5768776(+) | protein_length=434 | sequence_SO=chromosome | SO=protein_coding_gene | is_pseudo=false	MTTLEQNPADELVDYEEDEQNDAKEKGVEDVVVGRGNYVSIHASGFRDFFLKPELLRAIGDAGFEHPSEVQHETIPHAITGVDVLCQAKSGMGKTAVFVLSILQQLNLDTSGEEGNTQGVVCLGIAHTRELAFQIKNEFDRFSKYLKNVKCEVVYGGISIQKNIDMLKDAKTTPHILIGTPGRVLALIKGKHLNAEKVAHFVLDECDKCLEKLDMRKDVQNIFMATPKKKQVMFFSATMNKEIRDVCKRFMQSPVEVFIDDESKLTLHGLLQYYVKLQESEKNRKLNDLLDTLEFNQVIIFVKSVSRAQALDRLLTECNFPSIAIHAGLDQEERINRYQQFKNFEKRIMVATDLFGRGIDIERVNIVINYDMPDSSDSYLHRVGRAGRFGTKGLAITFV…	0	120.531	52	18	67	18	434	49.1	5.85	203.33	18	0.996	1.024	1.023	0.972	0.968	0.995	0.994	1.002	0.977	1.003	-0.01	0.03	0.03	-0.04	-0.05	-0.01	-0.01	0	-0.03	0	0.861138	0.150424	0.0878902	0.24281	0.155494	0.567228	0.753511	0.959947	0.684275	0.733642	0.996674	0.989773	0.971021
FALSE	High	Master Protein	TGGT1_315320-t26_1-p1	transcript=TGGT1_315320-t26_1 | gene=TGGT1_315320 | organism=Toxoplasma_gondii_GT1 | gene_product=SAG-related sequence SRS52A [Source:UniProtKB/TrEMBL;Acc:S7UMK1] | transcript_product=SAG-related sequence SRS52A | location=TGGT1_chrXI:4594837-4596241(+) | protein_length=329 | sequence_SO=chromosome | SO=protein_coding_gene | is_pseudo=false	MARISVVPIRLIMTGSLFFVVVVLMSTTALRAEGTNGAPSTKICNADAAAKGGISVEVDPATKKVSFSCGTDMGNVLPLPGDNNTITKCYSRANLQGETPLAEFFGEGSKANVQTASTTSGTSAEVSLTVGKLPEMTDTIYFACSTTPASGANRAPTGDPSQNSDGNRGKTKCVVTVTVPADPNANTCTVAKQSMTLMITKDSKTVSFLCDMDIATLLPQDFSHEILDESCQEKVKLADVLPSATFQETSSAHVFSVKELPKTEATYCYKCSPPVDSGDTADGKKNACTVKIRVSASSGENLSVSVTAGSVCALVFGLFVSSVFSTVPL	0	120.422	61	15	62	15	329	34.2	5.52	188.53	15	0.975	0.971	0.963	1.07	1.043	1.039	1.03	1.071	1.071	1.093	-0.04	-0.04	-0.05	0.1	0.06	0.05	0.04	0.1	0.1	0.13	0.369563	0.299559	0.584513	0.0122192	0.258033	0.261568	0.646555	0.332195	0.150604	0.217675	0.996674	0.989773	0.975418
FALSE	High	Master Protein	TGGT1_213392-t26_1-p1	transcript=TGGT1_213392-t26_1 | gene=TGGT1_213392 | organism=Toxoplasma_gondii_GT1 | gene_product=Surface antigen repeat-containing protein [Source:UniProtKB/TrEMBL;Acc:S7UP73] | transcript_product=surface antigen repeat-containing protein | location=TGGT1_chrV:850154-864700(+) | protein_length=2317 | sequence_SO=chromosome | SO=protein_coding_gene | is_pseudo=false	MSSGLWQIFKRKGKDGGEAETKATKAHMGEENKMYYNEKLKRWVVRGEEHLVEQEQLPPPPPTAAALQKPGNSDAGAALPSAGPRSFARGRTARSLYTATPGLSVRPAATSTAASLPKPAFVLPPFAASRLAVCPPSLSQEAQASSLPPGTSEEDRANAPPGSRDNVGERLGFDAAAKACGDAGSTDKTGQDSSLGESVLKGENLSEQQTPDPSLPVFSSSPVSASAGLSQAAAAGGARSRNHSGLDFEGGGSSDGVHLGGSTVSREPRSPCLSERKRTQPSCCEGQSDGQGIHVEGSGSSPCVAPETSIASPFGLPGDPASVSLSPPLPQSLSTPGPAQAPAAALMPSSPRLNADAFPADGDLSFPTAFVASQPADGAGQASSREETFSLHASGRPRG…	0	120.367	17	34	57	34	2317	253.3	4.93	119.71	34	1.009	1.015	1.029	1.002	1.011	1.017	1.031	0.979	0.985	0.998	0.01	0.02	0.04	0	0.02	0.02	0.04	-0.03	-0.02	0	0.685002	0.256523	0.325623	0.963982	0.744655	0.783964	0.446289	0.841717	0.813021	0.98864	0.996674	0.989773	0.971021
FALSE	High	Master Protein	TGGT1_269950-t26_1-p1	transcript=TGGT1_269950-t26_1 | gene=TGGT1_269950 | organism=Toxoplasma_gondii_GT1 | gene_product=Thioredoxin domain-containing protein [Source:UniProtKB/TrEMBL;Acc:S7V464] | transcript_product=hypothetical protein | location=TGGT1_chrVIII:5501073-5504592(-) | protein_length=944 | sequence_SO=chromosome | SO=protein_coding_gene | is_pseudo=false	MIGLFSSHFLRRHKMAGRASVVVSLLFSASLWSLLSRVDGAPANLSPAAHPAVPAVISEHPFGTSPVHMATSASGFREFVAQHLTAGDVVIVLFFSRHCPHCIRFKVTYRRLADRLGQRVKTEKNGAFFAAVDAGAAQVTDQEDSIWDILREFRVSFIPDVRLLVPLHRVRSAADEDGAELKNESPGTAKELGPDYGSLAAWTLQVSHHEMSEDGIDTLLRTYIETTGLDKLEENDEQFSEKRRSRQEILESNLKLLEAVCPTTEFPPAPVGSPVPALCRGGERWSPDAERVSGETPGNRLHDALAVFLHVMRRWIVASDSSLHLSLEKELALARFLELALYALPGKAIKGAIFRLLLHLRTLGSGLQPLPQSLLSREEFHAALEKASRMGEAGADENA…	0	120.306	28	25	52	25	944	104.6	5.73	127.45	25	0.98	0.987	0.967	1.097	1.075	1.083	1.061	1.019	1.017	1.041	-0.03	-0.02	-0.05	0.13	0.1	0.11	0.09	0.03	0.02	0.06	0.627629	0.728235	0.194544	0.576636	0.560174	0.53764	0.724851	0.433917	0.72433	0.450212	0.996674	0.995152	0.971021
FALSE	High	Master Protein	TGGT1_294898-t26_1-p1	transcript=TGGT1_294898-t26_1 | gene=TGGT1_294898 | organism=Toxoplasma_gondii_GT1 | gene_product=Tetratricopeptide repeat-containing protein [Source:UniProtKB/TrEMBL;Acc:S7VXI5] | transcript_product=tetratricopeptide repeat-containing protein | location=TGGT1_chrIa:1236755-1244990(-) | protein_length=827 | sequence_SO=chromosome | SO=protein_coding_gene | is_pseudo=false	MAPQHPAAAVSTADPAEKDATLEAAATGASACPRSAPTEQPSSAMHSRENTLGAQLFCCSGVDLGAQNSVLASADLAAPLAVDVEGNALSNRSTPSTEAFDGKLRLVGEEAEARATSNLRNTISHLPLWVAVKDEASLEKLKTRFPFSSFPAVSFDSRRREPVFTVAFDGESTQVGLTVVLAHFLKTVVSFAGTSRGRAVETRALAVALPSSFSTEEMSLVREACDLACLSRLVVPEVAESGDATDSDKNAAGEADGEKVDPTAGPLLLTRADALLNCWGCKHLPQVYAELPAGVCTPESGDEEGEVKFVALVDVGFAETSVQVAELRPRAEKDVNERQKIQDQIVMNRLSVVVDDALGTVDAINALATHVVGAVKTKYGEDVAPHSKRALRLFAGCQR…	0	120.243	36	27	56	27	827	88.6	5.29	126.55	27	0.994	0.983	0.964	1.014	1.008	0.997	0.978	0.995	0.98	0.991	-0.01	-0.02	-0.05	0.02	0.01	0	-0.03	-0.01	-0.03	-0.01	0.624941	0.485698	0.119934	0.241091	0.661187	0.83607	0.327105	0.592268	0.0367606	0.617186	0.996674	0.990049	0.971021
FALSE	High	Master Protein	TGGT1_273520-t26_1-p1	transcript=TGGT1_273520-t26_1 | gene=TGGT1_273520 | organism=Toxoplasma_gondii_GT1 | gene_product=Eukaryotic translation initiation factor 3 subunit E [Source:UniProtKB/TrEMBL;Acc:A0A125YQR1] | transcript_product=PCI domain-containing protein | location=TGGT1_chrVIII:3416534-3423842(+) | protein_length=601 | sequence_SO=chromosome | SO=protein_coding_gene | is_pseudo=false	MVSDSNMANGAAPSQGGLGLIKLMSPYWDSHMSIPVMDWMLSNEMITPEEREQMGQSLLGQAATTPAGRAAVEAEIREIEAKLVNFNNAIEAYKKEQQKRIGGYPDRKTLVDLSEWWMTNSGQSPAPPALELGVDALVPRLAKLYYDIGDYKQSLQQLQYMLTTLYELLAEGTNTQTRMACYWGVCACIILLHHQQQSENKSAASEETEKKEAAQDEELLQTLDHGEDEEGDAARAALAEAAKKAAVETHTAAQCILKLGDILDQVAAASSKKDHQGNPPLPAGLTMSREQQLLNRSWLLHWSVWPLFRYYFLMVHTKQFIPRNQAWSLMLEWVLHEGNLSCVTVVCPHLLRYYAVYAILNRKRKDHFQAVITAIGQGKNRYSDPFTSLLEALFLDFNF…	0	119.784	35	20	52	20	601	67.3	6.73	147.1	20	0.99	0.981	0.984	0.982	0.972	0.963	0.966	0.981	0.991	0.987	-0.01	-0.03	-0.02	-0.03	-0.04	-0.05	-0.05	-0.03	-0.01	-0.02	0.38227	0.671075	0.243097	0.76472	0.619095	0.724867	0.560521	0.640289	0.919126	0.746772	0.996674	0.99327	0.971021
FALSE	High	Master Protein	TGGT1_214970-t26_1-p1	transcript=TGGT1_214970-t26_1 | gene=TGGT1_214970 | organism=Toxoplasma_gondii_GT1 | gene_product=DNA helicase [Source:UniProtKB/TrEMBL;Acc:S7W5U3] | transcript_product=putative DNA replication licensing factor | location=TGGT1_chrX:6526260-6536268(+) | protein_length=1049 | sequence_SO=chromosome | SO=protein_coding_gene | is_pseudo=false	MSTNRASGLDRSPLRRTEEDSEADVNADGERGVVLSEVEEEDDQGRLRGGVLDENVDYFQGSRELDLEERRAEEEAEKIIDEENTEDLVFGMRDDEREREAFLAAGMDADAFDASLIDDEDLDDLDPHLEEKARRAAERHLDARENEARRKRRGDKAAKGDIWAQLLEEDDEGASEMDRVLRRVEERRRRFFSGTGMGGRGSEQINLHDLNEAKKLLTESNPALVPFGEQHQQAMDTLFKYFLYKFNLHAFRRVQHGGVGEEEEGEKRDDEKALYYLDRIQDMIREDRATILVDTRHLIFFSDQLVKWIEAYPLPALQVMNDVITVEAEASCPSLYSTRICSVILTDWPYKEELRQLRCTHLNSLISVSGVVTRRSSVLPKMRLLYLKCSNCLNSITDV…	0	119.498	28	28	53	28	1049	117.2	5.62	130.53	28	0.974	0.954	0.975	1.068	1.04	1.019	1.041	1.003	1.005	1.019	-0.04	-0.07	-0.04	0.09	0.06	0.03	0.06	0	0.01	0.03	0.576093	0.540395	0.15411	0.286699	0.0327809	0.548957	0.358648	0.9556	0.761189	0.413852	0.996674	0.990049	0.971021
FALSE	High	Master Protein	TGGT1_203980-t26_1-p1	transcript=TGGT1_203980-t26_1 | gene=TGGT1_203980 | organism=Toxoplasma_gondii_GT1 | gene_product=hypothetical protein | transcript_product=hypothetical protein | location=TGGT1_chrVIIa:1963789-1975923(+) | protein_length=1920 | sequence_SO=chromosome | SO=protein_coding_gene | is_pseudo=false	MQLQQAVRSGAGAPPSCQPGGCPDTSVSQPTLYNGESLASSVFPGPSPSADKAADLCIGTMQQTHFAGQASQMQAQPVHMLPQQVYMTPGASSPDLSSLPVFAQASSAPAPGAASTSPTGASPPGLVARAPPRRSRAERGRVAGPRNARPQEDIYKRTYSSVSRSSRRKGADASGDGGACLGFDGASETDMADASSMSGDSFPHSSGGGESETRPYGASLPATLDSGASASQRSNFDFHSGGSAAQNAGDEGASPHTRSGAGPAGQDGEAEQQEPSPSETGTGAGGAQGSGPSWKRRPTRRREGLRLRPLDDQEERVLPPDGKLYAYLLQRDKLAYNLWRKEVQRMSEETGGAGPGEGPQAPGATGAFAGAAVGGGRQRKRKEAASTVEPPRRLLRTLR…	0	119.236	16	26	42	26	1920	201.3	5.44	118.52	26	1.035	1.058	1.042	0.972	1.006	1.029	1.013	1.011	1	0.988	0.05	0.08	0.06	-0.04	0.01	0.04	0.02	0.02	0	-0.02	0.205798	0.341731	0.357015	0.260587	0.841885	0.646239	0.51534	0.55964	0.993443	0.765099	0.996674	0.990049	0.971021
FALSE	High	Master Protein	TGGT1_205710-t26_1-p1	transcript=TGGT1_205710-t26_1 | gene=TGGT1_205710 | organism=Toxoplasma_gondii_GT1 | gene_product=Lysine--tRNA ligase [Source:UniProtKB/TrEMBL;Acc:A0A125YM18] | transcript_product=lysine-tRNA ligase | location=TGGT1_chrVIIa:1115364-1120007(+) | protein_length=658 | sequence_SO=chromosome | SO=protein_coding_gene | is_pseudo=false	MRSPCSGGKSLFEALSLVFCWRPRVWPRVLQSGASQSRHQFLNSYRLPGTSPHFRPVSTMAPPAGDVATEAPEKRQANVNGDEPKISASERRRLRKAEQAAAKKDSKQQQQEGNSSPAVNNKAQKPEEELDPTQYFEKRCHLVQDLQRKGVPAYPHKFQVTLTIPEFIKMYGGLGDGEHLENEEVQIAGRISRVSASGQKLRFYDIRGDGEKIQVMSNFSYHDEKAGDFSEVHNRFRRGDVIGIRGFPGKSKRGELSIFPREVTLLSPCLHMLPERNSLKDFEVRFRHRYLDLMVNDETRKTFLIRSRIVNYLRRFLEDRGFVEVETPMMNVIAGGAAARPFKTHHNDLDMDLYMRIAPELFLKMLIVGGMDRVFEIGKNFRNEGIDMTHNPEFTACEF…	0	118.947	30	18	62	18	658	74.3	6.71	163.33	18	0.955	0.998	0.972	1.031	0.985	1.029	1.002	1.008	1.023	1.022	-0.07	0	-0.04	0.04	-0.02	0.04	0	0.01	0.03	0.03	0.1599	0.910725	0.434403	0.161817	0.156195	0.143662	0.90753	0.788083	0.481585	0.00869501	0.996674	0.998909	0.973444
FALSE	High	Master Protein	TGGT1_248810-t26_1-p1	transcript=TGGT1_248810-t26_1 | gene=TGGT1_248810 | organism=Toxoplasma_gondii_GT1 | gene_product=Nuclear factor NF7 [Source:UniProtKB/TrEMBL;Acc:S7V0H2] | transcript_product=nuclear factor NF7 | location=TGGT1_chrXII:4119880-4123828(+) | protein_length=497 | sequence_SO=chromosome | SO=protein_coding_gene | is_pseudo=false	MTVATLFPKEEGVGFSLTTQSHGECKVRVDLPSSISQADWERIFSSRMFQDWLSVYATADRLRLLRVALESSQHCKSSGEEKLTSVAMLVEAADKEGEVFSGPVYLRPQRRAVLVLLRNTETRTDMCLFVKKPNLSVGLADTLELPEGEFEAETGRFVGPAAEEVERQLEATIYEKNLVNLTQVTFGGGGLALGGDLSFASLSHDGKANNASQEKGPHVAVGLSGGERVELYLYRANVSPETMAGIEARVGRLRRRGKQTPEVTTHKPGQSGVQLSLVQLGDAWGLVADAPAVSALFLVHELRYHRLMPKYRNPLAESSEEAKTSRPVQKAAATFKSVQDLEPTSKGLNLRVKVVSPKVVDRDRTFPSGRTSREGHMVVGDESAVITLKLVDQQMELPD…	0	118.265	41	16	43	16	497	54.2	7.02	125.43	16	1.029	1.051	1.034	0.909	0.935	0.955	0.94	0.966	0.932	0.94	0.04	0.07	0.05	-0.14	-0.1	-0.07	-0.09	-0.05	-0.1	-0.09	0.191896	0.28943	0.350786	0.299467	0.340355	0.310119	0.269948	0.539443	0.373516	0.535031	0.996674	0.989773	0.971021
FALSE	High	Master Protein	TGGT1_271810-t26_1-p1	transcript=TGGT1_271810-t26_1 | gene=TGGT1_271810 | organism=Toxoplasma_gondii_GT1 | gene_product=Putative lanp [Source:UniProtKB/TrEMBL;Acc:S7V3U0] | transcript_product=putative lanp | location=TGGT1_chrVIII:4346960-4348612(-) | protein_length=283 | sequence_SO=chromosome | SO=protein_coding_gene | is_pseudo=false	MESAIRERVEHWFAKRGNGEVEEANGAASSASDEEMMKAAGEEMVELILDGRQFKSVSHEASDLLQKLQVLGKFTCNQTGLHSVEGFPVMPSVKTLELTDNHISGGLEALVKSFPNLKRLQLGGNYFRTFEVLEPLKDLCNLEHLGLDMSPISNQSEYRQKVFEMFPRLVVLDSTDKDGKEVEAADSDEEDEEEYDDDEEADTTLKDFYEKDLEDDDEEDEDDFNPDGEEEEDEDFDEEEEEDRLEGEEACEGAEGELEGKKRKNDAGEDENEAVKHARLGDL	0	117.946	69	16	36	16	283	32	4.23	107.61	16	0.992	1.014	1.012	0.99	0.982	1.004	1.003	0.995	0.98	0.966	-0.01	0.02	0.02	-0.01	-0.03	0.01	0	-0.01	-0.03	-0.05	0.793411	0.188635	0.673102	0.779686	0.0934224	0.895696	0.715156	0.582297	0.490781	0.315937	0.996674	0.989773	0.979747
FALSE	High	Master Protein	TGGT1_299810-t26_1-p1	transcript=TGGT1_299810-t26_1 | gene=TGGT1_299810 | organism=Toxoplasma_gondii_GT1 | gene_product=tRNA-synt_1e domain-containing protein [Source:UniProtKB/TrEMBL;Acc:S7UGP2] | transcript_product=cysteine-tRNA synthetase (CysRS) | location=TGGT1_chrXII:289809-302095(-) | protein_length=898 | sequence_SO=chromosome | SO=protein_coding_gene | is_pseudo=false	MRSPVLPQKSSVLRFLFLGCSLFLLFFSPCPRNRVSAFSLSDAVANCDRHEACSLRSPVAARFVCSRPLRSRPLTWTTRTRFPSSFLFLSPQTSFVRWDSAPKSAFVCMQGSPLLLRFPPRNASNRALRPAKPFALFHRTSCAFFSTHTCCSSAFLSLRNYCSTARNFHVSDSRRFSSSSASAPSGKPRNFRDTNGSSLSPRVQPSFAEKPSLKMATEERNGTACCGPAVGEHWEMPTKEGKLLTGLMVNNSMAGGKVEFVPQKGNRVCWYGCGPTVYDASHMGHARTYVTFDVIRRIMSDYLNYDVTMCMNITDIDDKIIKRSTEQGVDFLTLARHWEKEFFNDMTALNVRLPTVVTRVSEYIPEVVALIERIVKNGYGYESQGSVYFDTQTFRKNEK…	0	117.442	28	21	55	21	898	101.5	8.43	136.39	21	0.977	0.977	0.989	1.018	0.994	0.995	1.007	1.008	1.018	0.995	-0.03	-0.03	-0.02	0.03	-0.01	-0.01	0.01	0.01	0.03	-0.01	0.109554	0.300593	0.84316	0.604332	0.827436	0.744372	0.784423	0.848526	0.6886	0.914489	0.996674	0.989773	0.984106
FALSE	High	Master Protein	TGGT1_321620-t26_1-p1	transcript=TGGT1_321620-t26_1 | gene=TGGT1_321620 | organism=Toxoplasma_gondii_GT1 | gene_product=Dynamin-related protein DRPB [Source:UniProtKB/TrEMBL;Acc:A0A125YT61] | transcript_product=dynamin-related protein DRPB | location=TGGT1_chrIb:1696372-1706596(+) | protein_length=860 | sequence_SO=chromosome | SO=protein_coding_gene | is_pseudo=false	MDGKREDVSARPPAVSAPGDGEKSMTNGVKVESQMYQQLRKLINVVDELRDVGLQQFIQLPRICVVGTQSAGKSSVLEAIVGLDFLPRGDGVVTRRPLELRLVHLSEAEHDLNEAYAVFENDKERKIRDFEQVRQEIDRLTDQVAGKNKGIIDSPIVLTIYATQCPDLSLIDLPGITRVPLKGSDQCEDIEMLTRQMALRYASDPRTIILAVIPANVDMSTSDALQMSRRVDPRGVRTIGVITKIDLMDRGTDAAKMLMGEEIPLRLGYTGVRNRSQADIREGKSVRECLEEEKTFFATHPTYRLLPPHLVGVHSLVDKLTKVLFRHIKNFLPEIKREISSKTRVVLDRLQELGEGVPMEPSERAQLLWTAITDYVEIFKNTIRGKYDKRLQMYFEHQK…	0	117.169	32	25	64	25	860	95.9	6.3	158.2	25	1.005	1.005	0.991	1.013	1.018	1.018	1.003	1.008	1.003	1.01	0.01	0.01	-0.01	0.02	0.03	0.03	0	0.01	0	0.01	0.716044	0.790675	0.619116	0.722284	0.720497	0.745046	0.948829	0.898839	0.915342	0.798185	0.996674	0.995152	0.975418
FALSE	High	Master Protein	TGGT1_229180-t26_1-p1	transcript=TGGT1_229180-t26_1 | gene=TGGT1_229180 | organism=Toxoplasma_gondii_GT1 | gene_product=Importin N-terminal domain-containing protein [Source:UniProtKB/TrEMBL;Acc:S7V226] | transcript_product=HEAT repeat-containing protein | location=TGGT1_chrVIII:71618-81573(-) | protein_length=1238 | sequence_SO=chromosome | SO=protein_coding_gene | is_pseudo=false	MDLEAFVSLLRAVISPDPALRKEAERQIKEGKEKQPAALVSLVLQTVQTHSDDEVRLQAAVLFRSFFRGVIDSEGHVWRQLGDAERTQVKQILLHCLDTEKNKLVRNNICDTISDLASDLIPVDQWNDLGQVLLAMIQSGVPVKQQTGLKILSEIAPVLTEQLAAAAPLVCRIISACMASGQDVNTRVEAFALLVAVVEDMNKRVYKKFLPDAKTRAAPECPSVQLLVIDTLEATLRAGAEDDYALAERMMVSVIQLCEAEQGGGVSLLRPHLSQFCDYLLAISLIGQGQREAAEAAAAAGAAAAAAAQAAAASLGSTGALGADQGACVAATACATKTNDEETPEGLQNCRKYAIEALLCCVEQKSQVMLRVPNFLNRLLEALLMCMLDIRDSSYAKWL…	0	116.935	24	28	46	28	1238	136	4.79	102.44	28	0.999	1.004	0.984	0.986	0.985	0.99	0.971	1	1.019	0.99	0	0.01	-0.02	-0.02	-0.02	-0.01	-0.04	0	0.03	-0.02	0.930176	0.932924	0.479031	0.576435	0.329774	0.709576	0.0671686	0.947189	0.122527	0.753071	0.996674	0.998909	0.973444
FALSE	High	Master Protein	TGGT1_223540-t26_1-p1	transcript=TGGT1_223540-t26_1 | gene=TGGT1_223540 | organism=Toxoplasma_gondii_GT1 | gene_product=Importin N-terminal domain-containing protein [Source:UniProtKB/TrEMBL;Acc:S7UWB9] | transcript_product=importin-beta N-terminal domain-containing protein | location=TGGT1_chrX:3650759-3662029(-) | protein_length=1095 | sequence_SO=chromosome | SO=protein_coding_gene | is_pseudo=false	MAVAPPDPQQLCQVLEGTYSQNEEVRRTSEQYLQTISPSPGLLAALLKIVQHDQIDVGVRTSAAVMLKNEVKKHWDCPGAGLDENEEDASSARKKEEFYSGEEKTFIKDNIYQALIQVCPVSQPVSQQLLECIRLIALHDYPSSWPLLLPAVRSDIAARQDSSRLMCALSVLRRLCGIYEFKRTDKEALDSIIEQTWPLLLPAAAQLLNEGGLSNSDAMQMLKLICKVYWSSTQVCLASSGLVVSTMDDWMELMEQILVRPVPAEMLSGLEPGERCELPVFKVKKWALQIIQRAFSRFGDQKLLSRSRSKDNDVAHAFGRNFAMQWAPRFTEKILLLLRQRQERPEQVQFWLTPRMVNLMLQFLLLATEAAKIYSTLLKPSGEFLVSQVCVPLLQFNEE…	0	116.887	25	26	47	26	1095	122.1	4.77	122.57	26	1.017	1.048	1.047	0.989	1.005	1.036	1.035	0.995	1.057	1.019	0.02	0.07	0.07	-0.02	0.01	0.05	0.05	-0.01	0.08	0.03	0.520374	0.208577	0.261054	0.825977	0.942361	0.382313	0.333189	0.935019	0.363682	0.713505	0.996674	0.989773	0.971021
FALSE	High	Master Protein	TGGT1_297500-t26_1-p1	transcript=TGGT1_297500-t26_1 | gene=TGGT1_297500 | organism=Toxoplasma_gondii_GT1 | gene_product=T-complex protein 1 subunit eta [Source:UniProtKB/TrEMBL;Acc:S7UKY6] | transcript_product=T-complex protein 1 eta subunit | location=TGGT1_chrII:1806900-1814443(-) | protein_length=546 | sequence_SO=chromosome | SO=protein_coding_gene | is_pseudo=false	MSHLLNAPIILLKDGVDTSQGRGQIISNINACQVIADIVRSTLGPRGMDKLIHSENGVTISNDGATVVSLLNVVHPAAALLVDIAKAQDDEVGDGTTSVVLLAGEFLESAKTFIEGGMAPQILINGYRTACQLAIEKIRELKVDLSSTPPHEKRVLLERCAQTTLNSKLVSGHKDFFAKMVVDAVSMLDDSLDKEMIGVKKVTGGSYTDSFVVQGVAFAKTFSYAGFEQQPKRFENAKILLLNLELELKAEKENAEVRLKTPDEYQAIIDAEWDIIYEKLDKISATGAQVVLSRLPIGDLATQYFADRDIFCAGRVDEGDMKRTARATGAKIQTTVNSITPDVLGTCGVFEERQIGGERFNLFMHCPQTQSATIVLRGGAPQFLDEADRSLNDAVMIVR…	0	116.701	47	20	42	20	546	59.4	5.96	110.39	20	0.998	1.018	0.993	0.996	0.994	1.014	0.989	1.009	1.005	0.987	0	0.03	-0.01	-0.01	-0.01	0.02	-0.02	0.01	0.01	-0.02	0.957563	0.394911	0.768424	0.921083	0.41672	0.565736	0.529053	0.61878	0.859345	0.708785	0.998956	0.990049	0.984106
FALSE	High	Master Protein	TGGT1_214090-t26_1-p1	transcript=TGGT1_214090-t26_1 | gene=TGGT1_214090 | organism=Toxoplasma_gondii_GT1 | gene_product=Signal peptidase [Source:UniProtKB/TrEMBL;Acc:S7W5I3] | transcript_product=signal peptidase | location=TGGT1_chrX:5908335-5920860(+) | protein_length=1859 | sequence_SO=chromosome | SO=protein_coding_gene | is_pseudo=false	MAPTKQRVGALDVRALVASVRPSIVGLRVTNVYDFSAGGSRGGTSSSYILKFAGKESKVFLFIHAGFRLYTTEWKKDKGALPSPFCVRLRKGLRGKKLEDIHQHGADRVVILTFGKSENALHLVVELYVSGNIILTDHTNLIQAVLRRHTLSAPAGAAPAEGGREARQETEQRIAVNEYYRLDPPEMSLLRDAIRPIDFSADVVKRQLTAIQEAACGKDTKSKTQVTWAQALGRLAPFVSPALAVHALLATTGDESAKKRVLTQDGLDEAVESLRRAVMECLRMLRAVSSAEDFLGAGPLPAELESQASATPPVEGYIVATRRSASSAEEKSLSFSLLYDYEEFSPVVLRQFADLQVLPSPQDIQREREERAAVAVQRLQVDRNTNSQKEADEKEEEEE…	0	116.542	22	34	44	34	1859	203.4	5.82	88.93	34	0.986	1.013	1.006	1.003	0.989	1.016	1.009	1.032	0.989	1.018	-0.02	0.02	0.01	0	-0.02	0.02	0.01	0.05	-0.02	0.03	0.63267	0.657313	0.337259	0.953025	0.877967	0.83223	0.837918	0.481006	0.633567	0.577709	0.996674	0.990049	0.971021
FALSE	High	Master Protein	TGGT1_221470-t26_1-p1	transcript=TGGT1_221470-t26_1 | gene=TGGT1_221470 | organism=Toxoplasma_gondii_GT1 | gene_product=hypothetical protein | transcript_product=hypothetical protein | location=TGGT1_chrII:360683-367434(+) | protein_length=552 | sequence_SO=chromosome | SO=protein_coding_gene | is_pseudo=false	MFNPNATMDWIRGGPAAGVVFQVHQSKFVIPAEVMNRSDVQGSGLALVAKNEGFKDIPPKLPRAEDGSILLSRPLESFELLVDHLLELEPLKNIPLKDFASKYIALKSEVAYWQLPLDDLPFNDRIYFETAWTDENCLFPLTDEDAAALDRQTAAEAPSGRRVALSSLTTQPAEISKAFLDVEKNPEEAKDWSFFAVEAEEARTSGSSEASPDRLVFAVGPKKFFCKVPFVSDLCVHYGRLPEREADFSSFAILVSPAETTVVWNRGCFIHIRVREEASGPLSAQINVIQETPSWLCVHPYLDYVLSGVKGPVPHVFCFNMPEASAVRFFPWGCLVVNKQVTLESRKKADFQNSSAIVARAPTRDEGGANEHFKRLFTFLQPDAPKRGHEDLPEYKPAK…	0	116.376	50	23	61	23	552	61.6	6.18	140.29	23	0.995	1.004	0.984	0.994	0.988	0.998	0.978	1.011	0.994	1.009	-0.01	0.01	-0.02	-0.01	-0.02	0	-0.03	0.02	-0.01	0.01	0.721488	0.796769	0.764844	0.144157	0.446602	0.897722	0.672187	0.616818	0.492352	0.467652	0.996674	0.995152	0.983537
FALSE	High	Master Protein	TGGT1_235930-t26_1-p1	transcript=TGGT1_235930-t26_1 | gene=TGGT1_235930 | organism=Toxoplasma_gondii_GT1 | gene_product=Domain K-type RNA binding proteins family protein [Source:UniProtKB/TrEMBL;Acc:A0A125YQ53] | transcript_product=domain K- type RNA binding proteins family protein | location=TGGT1_chrX:5075263-5081044(+) | protein_length=570 | sequence_SO=chromosome | SO=protein_coding_gene | is_pseudo=false	MAQEEAEDVKMDRRSSRGPSGSRDGSRSRERSPRQDRSPPRDGELREDSGNGDDRRASSVGRRSRSRSYRSPRRSESRGSSRNGRRHSRSGSRSRDAPTRHPDGYWTDGKEAFILNIADEDASFILGSGGRTKRKLSHVCGADLNILERDGRTVLEIRGTPDTIDKAKLYIGFVMQQRVGPVALPPDAEKRDDLTIIHVPHECVGYVTGRKGAGLRSVEEEWNTLMFFTDLRSKEAGETEKLAIFGELRARRGSELKVMSAVEQKMPGYFIKDDEEHFSNNPEFDTDRIPIKLEDYSYALGQRGSTRKKLARASGAILEYVGRHAYIAGTLAERTRARQYLQWLCAQRTSYVHVETDGRDDCDVVSLPVDAVAYVTGSKGSNLRRAEEETGTFIFLDGS…	0	116.034	42	23	71	23	570	64.2	9.94	202.94	23	0.99	0.991	0.987	1.013	1.003	1.004	0.999	1.001	0.986	0.987	-0.01	-0.01	-0.02	0.02	0	0.01	0	0	-0.02	-0.02	0.561548	0.26379	0.266961	0.0856079	0.8295	0.611381	0.931903	0.815961	0.371161	0.638688	0.996674	0.989773	0.971021
FALSE	High	Master Protein	TGGT1_222860-t26_1-p1	transcript=TGGT1_222860-t26_1 | gene=TGGT1_222860 | organism=Toxoplasma_gondii_GT1 | gene_product=Eukaryotic translation initiation factor 3 subunit B [Source:UniProtKB/TrEMBL;Acc:A0A125YS98] | transcript_product=putative eukaryotic translation initiation factor | location=TGGT1_chrII:1241196-1252687(-) | protein_length=756 | sequence_SO=chromosome | SO=protein_coding_gene | is_pseudo=false	MVRIDKDDLPAEEQDLLEFLSEDSDEGEDDDSEQGEEKLKEKLSQMEPLLQMDYSFPSTIVLVGVPKVGKDKHEKLRLVLDKKMGEELLKKGAESVNEGLTISMPVNEETGMTKGFCFVTFSNQFNAQHAAHHLNGWALDAKHTFRAALLDDFDEIVGRGANYRPPIKLLGFTRENFRWWLLDARGREQFVIRYAGETEIYWHDPIERDCSVLVYNGHRERADGKRVWTDFRVQWSPQGSFLATFHRPGIALWAGDQFEKKVRFEHKDVKQIDFSPNETYVITWDGSPAQLRNEKAVRIWKVMTGELLRQFPTPAYSPRGGEYPHFLFSHDDRYVARMGEKELCVYQMECDDEPEAEGEKSDEKGRKDRCAVRLLRDPRDGKLSSLKYPLEKFEWSPTE…	0	114.769	30	22	58	22	756	88.3	5.5	141.15	22	1.006	1.016	1.022	0.991	0.998	1.007	1.013	0.997	1.031	1.009	0.01	0.02	0.03	-0.01	0	0.01	0.02	0	0.04	0.01	0.0810401	0.0168245	0.1882	0.80444	0.946643	0.843114	0.640722	0.924295	0.563894	0.760298	0.996674	0.989773	0.971021
FALSE	High	Master Protein	TGGT1_320570-t26_1-p1	transcript=TGGT1_320570-t26_1 | gene=TGGT1_320570 | organism=Toxoplasma_gondii_GT1 | gene_product=Tr-type G domain-containing protein [Source:UniProtKB/TrEMBL;Acc:S7UJX2] | transcript_product=putative elongation factor Tu | location=TGGT1_chrIV:197431-203338(+) | protein_length=586 | sequence_SO=chromosome | SO=protein_coding_gene | is_pseudo=false	MSGFVFNPNASVFVPGGVSSAPPPPPPASEDPARALSCPAAQAPAASLGTAPKAMTTASVPTVKEVTEQMEHLQVQQKESCWSDEADDRVEDTGFPANEEKAAETAPAASAAAAQQPAGSPEGVMSKAQVREAAAAAANKKNPPDSRPHLNIVFIGHVDAGKSTTCGNILYLTGGVDERTIEKYEKEAKEKNRESWFLAFVMDTNEEERQKGKTVEVGRAFFSTPNRRFTLLDAPGHKAFVPNMIEGAAQADIGVLIISARKGEFETGFEKGGQTREHALLAKTLGVNQLVIAVNKMDEPTCGWSQARFEEIEKKLTPFLKSCGFNPAKDIFFIPISGLHGQNLKDHVSRPGTKAYDARASWYGTDRPSLFELFDSVPLPDRKADDPLRVPILDGYKDG…	0	113.982	36	23	60	23	586	63.5	6.05	133.63	23	0.97	0.986	0.99	1.011	0.98	0.996	1.001	0.991	1.001	1.012	-0.04	-0.02	-0.01	0.02	-0.03	-0.01	0	-0.01	0	0.02	0.430045	0.683094	0.688308	0.271066	0.496309	0.926869	0.974467	0.497541	0.951488	0.461446	0.996674	0.99327	0.980327
FALSE	High	Master Protein	TGGT1_231600-t26_1-p1	transcript=TGGT1_231600-t26_1 | gene=TGGT1_231600 | organism=Toxoplasma_gondii_GT1 | gene_product=HEAT repeat-containing protein [Source:UniProtKB/TrEMBL;Acc:A0A125YHR1] | transcript_product=HEAT repeat-containing protein | location=TGGT1_chrVIII:1475035-1486295(-) | protein_length=1169 | sequence_SO=chromosome | SO=protein_coding_gene | is_pseudo=false	MSAAGTPHPAMADLQLQLEQLLLASLDPAQVKPASEQLRTLLQQEQVEQRRLAYLLLAKQIVDGRQEEVRQLSAVLLRRKISKAMAVFDENQQKEFITSLVARFSQEPSASVRRAVVHLLASILRLATLQEAKRRELFSALSHMAMQNPSPGTDPQQLQQQVAAVSTFVAVAEACPDELVDYFDEFLTVFRHAFTCAAAGNELGTSALKGLRSLAEFAEEPDQQKKVCALVPNVMQIIAAAVQANEEDVATTGIQLIDDLLSNDNMAMKDGELLTVLDFLLKTVASRSDVDAGLRQQALSCIQWAAKQKPRVLCKSPTVVPAILDVLVAMGAEPDVQGGGPEDFEEDELTPHRIAAQCVDALAISLPSKYVFQPMLDRLTPFTQSTDILKKRAALVLLG…	0	113.939	22	21	45	21	1169	128	5.01	124.27	21	1.022	1.008	0.965	0.998	1.02	1.006	0.962	0.97	0.973	0.991	0.03	0.01	-0.05	0	0.03	0.01	-0.06	-0.04	-0.04	-0.01	0.318045	0.477539	0.51626	0.825671	0.115244	0.124882	0.415855	0.256736	0.510151	0.453488	0.996674	0.990049	0.973444
FALSE	High	Master Protein	TGGT1_289300-t26_1-p1	transcript=TGGT1_289300-t26_1 | gene=TGGT1_289300 | organism=Toxoplasma_gondii_GT1 | gene_product=tRNA-binding domain-containing protein [Source:UniProtKB/TrEMBL;Acc:S7VYI1] | transcript_product=methionyl-tRNA synthetase | location=TGGT1_chrIX:2966904-2971258(+) | protein_length=976 | sequence_SO=chromosome | SO=protein_coding_gene | is_pseudo=false	MSTMTGSSPKSAASSTPLRLVAGSAVPRGDVAACIAVGHALNIPVVLVSKDADKAEQAEPSSSAPAPPPQAPVASSASEEDKKDLCVLLTREGSVVSAYAICLYLLSLARKRLAETKTAAPEKRLESREKLSEAYEGDAWQAEDALAWAAFKLRGALRGVRKDLLLQQLNLLEERIAGSSDCAFPALSALLSTSAPSPFVAPAMFVFCMLRYAHPTSAFSDWPALSAFLGSLGASPAAAATLKAVPLPARSCGFPEMSQALLASAGACAVAQRQREKFYITTAINYTNGPPHMGHVYEIVTSDALARFHRIAGRDVFFLTGTDEHGQKIANTAERLGKTPQEICDFYAAGFQAMNAKLCVSNDQYIRTTQAAHKAVCQWLWKRVQERGDIYLDTYVGWY…	0	113.701	30	25	51	25	976	106	6.67	145.24	25	1.004	1.018	1.018	0.999	1.002	1.017	1.017	1.011	1.016	1.006	0.01	0.03	0.03	0	0	0.02	0.02	0.02	0.02	0.01	0.921566	0.349891	0.119605	0.945576	0.903947	0.0404113	0.295412	0.801338	0.63329	0.706888	0.996674	0.990049	0.971021
FALSE	High	Master Protein	TGGT1_311360-t26_1-p1	transcript=TGGT1_311360-t26_1 | gene=TGGT1_311360 | organism=Toxoplasma_gondii_GT1 | gene_product=Protein kinase G AGC kinase family member PKG [Source:UniProtKB/TrEMBL;Acc:S7UT18] | transcript_product=protein kinase G AGC kinase family member PKG | location=TGGT1_chrXI:1956120-1971174(-) | protein_length=994 | sequence_SO=chromosome | SO=protein_coding_gene | is_pseudo=false	MGACISKNSSARVSRSSALSASKQTVAASAPPGAAGDETSATGAAEEASRNSLARVDGTRASAAELERAPDGVCPDREEPGTANAEQGGVTEKKDTRETLAGMNSPKTLEAEAQEDDLKREAPNQDVPSEAPEGPKEKPGGDRKPAQKAILKQDDSHTEEEKLNAHLAYREKTPADFALIQDSLKANLVCSSLNEGEIDALAVAMQFFTFKKGDVVTKQGEPGSYFFIIHSGTFDVLVNDKRVNAMDKGKAFGEIALIHNTERSATVVASSTEGALWGVQRHTFRETLKQLSSRNFAENRQFLASVKFFEMLTEAQKNVITNALVVENFKPGQPIVKEGDAGDVLYILKSGKAKVSIGGREIRMLRKGDYFGERALLYKEPRSATITAEEFTVCVSIGR…	0	113.615	26	25	50	25	994	111.2	6.16	125.52	25	1.022	0.998	1.008	1.018	1.041	1.016	1.026	1.008	1.018	1.07	0.03	0	0.01	0.03	0.06	0.02	0.04	0.01	0.03	0.1	0.620358	0.236188	0.80123	0.618632	0.619593	0.645783	0.699698	0.900158	0.557508	0.324443	0.996674	0.989773	0.984106
FALSE	High	Master Protein	TGGT1_266640-t26_1-p1	transcript=TGGT1_266640-t26_1 | gene=TGGT1_266640 | organism=Toxoplasma_gondii_GT1 | gene_product=Acetyl-coenzyme A synthetase [Source:UniProtKB/TrEMBL;Acc:S7UHB7] | transcript_product=putative Acetyl-coenzyme A synthetase 2 | location=TGGT1_chrIX:887254-895827(+) | protein_length=714 | sequence_SO=chromosome | SO=protein_coding_gene | is_pseudo=false	MEKDRNTMEGGAEHVERGRCGGSAMEKDDECQYTPSTSPPVEVAEEATDDVEKISSSLPVNERYKVPRQNQTRCQIHDKETYEHMYWRSLHDADSFWREQATEILRWTAPFTKVFHGRMEDGNVSWFLNGKLNVCDNCVDRWAEKFPNRVALICEGDDPDQSRTITYRKLLRKVCQFANMLKRLGVRKGDVVSIYLPMGPEIVYAMLACARIGAVHNVIFAGFAASSLAERIHDAESHILITADQSSRGGKTIFLKDIADEAMAICPQVRHLVVFRCKGEPLKNWVEGRDIWGNELMSQMQPYCPLEVMDSEDPLFILYTSGSTGKPKGLCHSTAGYLLYAALTHKCVFDYHPGDIYACVADCGWITGHSYVVYGPLCNGATTLLFQSIPTYPDPGRYW…	0	113.591	35	20	53	20	714	79.9	6.89	163.46	20	1.002	1.001	0.973	0.988	0.99	0.989	0.961	1.009	1.02	0.99	0	0	-0.04	-0.02	-0.01	-0.02	-0.06	0.01	0.03	-0.01	0.876614	0.970829	0.119748	0.542699	0.763678	0.244448	0.138818	0.473633	0.28813	0.127545	0.996674	0.998909	0.971021
FALSE	High	Master Protein	TGGT1_243920-t26_1-p1	transcript=TGGT1_243920-t26_1 | gene=TGGT1_243920 | organism=Toxoplasma_gondii_GT1 | gene_product=MCM domain-containing protein [Source:UniProtKB/TrEMBL;Acc:A0A125YSK7] | transcript_product=putative DNA replication licensing factor MCM5 | location=TGGT1_chrVI:2796800-2806044(+) | protein_length=794 | sequence_SO=chromosome | SO=protein_coding_gene | is_pseudo=false	MEETPVYFNTSRLEEGGFSSSSPSALMLPSSLPSVQQMKFNFRQYLNHGGAELKRRLLAHAEKNERCLLHVDLNDLKVYQHHVSEADLKCVDTPYCKKKHHAAPPDFARQLVTGLRQRPLVYLPTCERVCEEVIEKSAILPPRQLAASLALGGTAGRHGRRGPVQVQINLMDTSATHTPIRHLLSRQQEQFVVTTGIIISSRPPASRLQTVTIQCRYCNHKMIISLPEWREQLQLPRFCLYSQQRAAVASTAGPASVLGGDAGDLADLGCRNKPDPYFMVTNECSFVDVQSLKLQELPEDVPTGDMPRHLLLNCTRLLTDQAFPGDRLIIHGVLTTNVATPAVRHTGSKETDQPHSSYLHVLGLQKVSFMSLARTRLSFTQTEQRDVFYKLAQSQNILD…	0	113.009	34	25	53	25	794	88.2	8.41	135.55	25	1	1.03	1.039	1.06	1.059	1.092	1.101	1.074	1.038	1.042	0	0.04	0.06	0.08	0.08	0.13	0.14	0.1	0.05	0.06	0.994693	0.599327	0.489028	0.225965	0.153903	0.139377	0.101877	0.0675833	0.30777	0.224169	0.999123	0.990049	0.973444
FALSE	High	Master Protein	TGGT1_297720-t26_1-p1	transcript=TGGT1_297720-t26_1 | gene=TGGT1_297720 | organism=Toxoplasma_gondii_GT1 | gene_product=CBM20 domain-containing protein [Source:UniProtKB/TrEMBL;Acc:S7VZF6] | transcript_product=trehalose-phosphatase | location=TGGT1_chrII:1916468-1928938(+) | protein_length=1222 | sequence_SO=chromosome | SO=protein_coding_gene | is_pseudo=false	MLYTRVFFRAVVRTDFGERVAVVGSSPSLGNWQAEHGHELTTNEDVFPSWFSKEPVYLPLKKPISYKYVVLDERGDIVRWEECEGNRELVPTGLEMTVEDDDGLFREQMTNRGDHGVEGDDDVSVAALDKEEVDARNRMLAIQEEEPEFDENDSVIVCALDLPLRVVRVSPSREASPLPSSLPASSTDSSGQTEKRAVSFPEDAGASARRSSSTVAATREEETTRTASSFPKVEETAERGRDSSLALWPGAARDAAGDFGEALQPRATRSRRGTFEVRPSKSALLPSLFHLRKKTRLPVRFVGWPGIHVENEEEQAEIAELLRAYDCSPIFPDKDEFDCHLTFCHQVLWPLFHNVVVLDSNTQVPFDSDLWAKYQAVNKLWADAVLRQAHETDMVWVHD…	0	112.886	27	30	46	30	1222	136.6	6.25	95.65	30	1.022	0.983	1.023	1.021	1.043	1.004	1.045	1.047	1.048	1.054	0.03	-0.02	0.03	0.03	0.06	0.01	0.06	0.07	0.07	0.08	0.0900799	0.607298	0.117834	0.787423	0.626865	0.969771	0.62298	0.55867	0.665456	0.493849	0.996674	0.990049	0.971021
FALSE	High	Master Protein	TGGT1_289540-t26_1-p1	transcript=TGGT1_289540-t26_1 | gene=TGGT1_289540 | organism=Toxoplasma_gondii_GT1 | gene_product=hypothetical protein | transcript_product=hypothetical protein | location=TGGT1_chrIX:3100902-3103715(+) | protein_length=937 | sequence_SO=chromosome | SO=protein_coding_gene | is_pseudo=false	MSHKTMAKSGGRSTGAVRSHDAGSPSAPVASKSRPWRLGCMVVSLAAFAVAISTPSLSPAPASLASFSGLQPAEAAGLVASMKRAANQGWRTGARWLCTVFGLQYEHVKSVFRRSGRHLELETLSEEVDRYLQLVEAAGHNEGNLPDAYQERGVHLVLAAQELFSRVLGKRVELPARYKAAARRFEAMKKKKKDSGSRKGPAPESATEAPAPAEPTGSDVSSSGAEARPQAESPAKEASKPEAEAVPTAASSLVAVPMRDRAFEESANERLRALKARHEADVSAIVDEANTRLKQYQEEHKMTYDKKISHLRAQQHAELDQALRELQEETLRFEDGKKQYEVVSALLTEAKAGIAVLSEGLQFIGANFYSIDQQIDKVAEEQKELEQADGDKAMIQKAF…	0	112.844	29	22	43	22	937	100.5	7.23	118.98	22	1.006	1.002	0.996	1.017	1.023	1.019	1.013	0.98	0.981	0.951	0.01	0	-0.01	0.02	0.03	0.03	0.02	-0.03	-0.03	-0.07	0.238436	0.965313	0.89789	0.730656	0.634291	0.831619	0.875812	0.0183835	0.100848	0.0528734	0.996674	0.998909	0.991016
FALSE	High	Master Protein	TGGT1_265840-t26_1-p1	transcript=TGGT1_265840-t26_1 | gene=TGGT1_265840 | organism=Toxoplasma_gondii_GT1 | gene_product=hypothetical protein | transcript_product=hypothetical protein | location=TGGT1_chrIX:1241089-1248136(+) | protein_length=1332 | sequence_SO=chromosome | SO=protein_coding_gene | is_pseudo=false	MRPAVPQSPVPLSFPPPASLASPLCPFSVRCPGEILRVSSVQMAHPSEPPPHVRGEWTSVQQRRRHLLFSSLSPPSPGTHASPPFPLPSAHAAPFASNGVSPLHDSTEPLLSGERRSSQTQRGGPERTDGGERGERGRRGSPETLNAALKAAGEMVKYAASQWERAASQSESLVAALKVSLEKETVSRRRVEELEAQLTAQEQRMQLEEQRRELEREEEKEKNLLSAEVTSLREQLRSASNLAAEQQLKVETELSVLRGELRRREEEICEHMLQLEKVHVINQGLQQQVAELLSFREAGSACTASRSSSPQSPLPENCAALPAAERQKRVETLGAAAESYASEMQTKLASLRSLLDSGAGKKDLAPESTDAERRRGQATESQALHDELERMKKQLEAAE…	0	112.48	26	32	44	32	1332	148.4	5.6	104.37	32	1.04	1.016	1.053	1.004	1.044	1.02	1.058	1.026	1.012	1.016	0.06	0.02	0.08	0.01	0.06	0.03	0.08	0.04	0.02	0.02	0.590028	0.884312	0.33401	0.947244	0.0120174	0.670817	0.230518	0.310314	0.765761	0.820388	0.996674	0.998909	0.971021
FALSE	High	Master Protein	TGGT1_232440-t26_1-p1	transcript=TGGT1_232440-t26_1 | gene=TGGT1_232440 | organism=Toxoplasma_gondii_GT1 | gene_product=Brf1p family coiled coil protein [Source:UniProtKB/TrEMBL;Acc:A0A125YMJ3] | transcript_product=Brf1p family coiled coil protein | location=TGGT1_chrVIII:2091405-2096025(+) | protein_length=468 | sequence_SO=chromosome | SO=protein_coding_gene | is_pseudo=false	MANATEKASPAGKKDHKEKLAPVPKPNDKEFKDRIEAETRAIDELKAKINDLQQRITSVVGGRDEYNRKKQEMRSRLDELQAQMDKYEAERKRLTEAIDSRQKEGWEMKQNVQDMKRKLGFSSTEEIDKRIAALEHSMMTSTLTLKEEKKLLDQIKQLKHNKPLVGKFAGLEAGASSFEETSVYPLRAMLDEARTKLLELRALKREEQEKYFALVKQRQEATAPGRELIEERDRLSKQMSEHMIKRREIQDEYKKENWKYQAFLAQQRQERNEKMREERARRQIEQERANLERQLEMVDEEPVDGELILLTQTIAYVQKIMDEHNQTQDGSPGTEQKKTPEAPKGDGMALLPKSQREEEYFFAPKGGKKKTEGGKKAKPKNIKHDIGTLLYFEQCGVAA…	0	112.48	37	19	68	19	468	54	6.62	167.57	19	1.002	0.994	0.997	1.009	1.011	1.002	1.006	1.006	1.002	1.02	0	-0.01	0	0.01	0.02	0	0.01	0.01	0	0.03	0.163782	0.262994	0.520315	0.580228	0.519285	0.906011	0.606897	0.23539	0.789794	0.3116	0.996674	0.989773	0.973444
FALSE	High	Master Protein	TGGT1_254690-t26_1-p1	transcript=TGGT1_254690-t26_1 | gene=TGGT1_254690 | organism=Toxoplasma_gondii_GT1 | gene_product=Hydrolase_4 domain-containing protein [Source:UniProtKB/TrEMBL;Acc:A0A125YUU0] | transcript_product=phospholipase/carboxylesterase | location=TGGT1_chrIII:1864196-1866935(+) | protein_length=497 | sequence_SO=chromosome | SO=protein_coding_gene | is_pseudo=false	MESGEIGSGEAANPAASIFLAIAGFAARATWVGGLILLCMVVLLWYFQEKLLFYPGVPQGFETPDKNPKGLRSPAERGLPFEELWLRTVDGVKLHCWLIKQKLPQVAAHAPTLIFFHGNAGNVGFRLPNVELLYKHVGVNVLIVSYRGYGFSEGSPTEAGVYRDGEAALDMLIERQNELHIDANKIFLFGRSLGGAVAIDLAVQRPHQVRGVIVENTFTSLLDMVWVVFPLLRPFQRTVRILQRLYMDNGEKIQRLRLPILFISGQKDELVPTRHMKKLFELCPSPLKEKEDVPLGGHNDTWEWAIGGKSYYDRIAAFIQHALQFEDQQSRQQIDESGLTRRRPSSSPSDTLTIPSISKSGAQVLEEEERSVHDLPLSVTPADAAAMCSSGASESVLPK…	0	112.402	53	22	41	22	497	54.2	6.1	108.94	22	1.049	1.066	1.054	0.931	0.977	0.993	0.981	0.985	0.958	0.981	0.07	0.09	0.08	-0.1	-0.03	-0.01	-0.03	-0.02	-0.06	-0.03	0.0144186	0.435367	0.208004	0.300057	0.642029	0.717905	0.494638	0.596287	0.133183	0.555982	0.996674	0.990049	0.971021
FALSE	High	Master Protein	TGGT1_205250-t26_1-p1	transcript=TGGT1_205250-t26_1 | gene=TGGT1_205250 | organism=Toxoplasma_gondii_GT1 | gene_product=Protein kinase domain-containing protein [Source:UniProtKB/TrEMBL;Acc:A0A125YQA8] | transcript_product=rhoptry protein ROP18 | location=TGGT1_chrVIIa:1426782-1428446(-) | protein_length=554 | sequence_SO=chromosome | SO=protein_coding_gene | is_pseudo=false	MFSVQRPPLTRTVVRMGLATLLPKTACLAGLNVALVFLLFQVQDGTGITLGPSKLDSKPTSLDSQQHVADKRWLATVGHYKHLAGATESTRDVSLLEERAQHRVNAQETNQRRTIFQRLLNLLRRRERDGEVSGSAADSSSRPRLSVRQRLAQLWRRAKSLFKRGIRRYFPQGRNRQRSLRAQRRRSELVFEKADSGCVIGKRILAHMQEQIGQPQALENSERLDRILTVAAWPPDVPKRFVSVTTGETRTLVRGAPLGSGGFATVYEATDVETNEELAVKVFMSEKEPTDETMLDLQRESSCYRNFSLAKTAKDAQESCRFMVPSDVVMLEGQPASTEVVIGLTTRWVPNYFLLMMRAEADMSKVISWVFGDASVNKSEFGLVVRMYLSSQAIKLVAN…	0	111.831	36	20	87	20	554	62.3	9.25	211.29	20	1.006	1.004	1.011	1	1.006	1.004	1.011	1.018	1.019	1.019	0.01	0.01	0.02	0	0.01	0.01	0.02	0.03	0.03	0.03	0.730636	0.480891	0.546588	0.999554	0.0199944	0.851223	0.74707	0.186161	0.343577	0.28237	0.996674	0.990049	0.973444
FALSE	High	Master Protein	TGGT1_224460-t26_1-p1	transcript=TGGT1_224460-t26_1 | gene=TGGT1_224460 | organism=Toxoplasma_gondii_GT1 | gene_product=Putative aminopeptidase n [Source:UniProtKB/TrEMBL;Acc:S7UWT6] | transcript_product=putative aminopeptidase n | location=TGGT1_chrX:2956872-2964821(+) | protein_length=970 | sequence_SO=chromosome | SO=protein_coding_gene | is_pseudo=false	MVTLSATTMNATVSPCRISGGVSSRLCGWGVLSFLLASVITVQVSRAGEEKEEPKAVVRLDYKPPNFYLEDIVLDFNLDDEDTTVEALLTLYRRAGTEPMNLVLDGDESVILKSISLATTSSPSLRGQGRVTFTELDGQMPTDSQFQFRIVDGNLMVSKFLLPREAEVRFYIRTLVSINPKANLALFGLYKAGDIFVTLNEPSGFRRITYGVDRPDVLATYTVTVTAPRHLPILLSNGDKVLSGYAGENRHFAKFVDPFPKPSYLFALVAGDFASVSGEFVTMSGRSVTVTIYAQHHQRNQLQWALRSLLRAMRWDEETFGREYQYSEFRVLCVEVFNPGAMENTSLNIFTCSLLLADPKLTTDADHRLIVDVVSHEYFHNWTGNRVTVQDWFQLTLKE…	0	111.705	30	28	57	26	970	108.7	5.92	137.29	28	0.988	1.065	1.024	1.025	1.013	1.092	1.05	0.985	0.994	0.987	-0.02	0.09	0.03	0.04	0.02	0.13	0.07	-0.02	-0.01	-0.02	0.0934337	0.232553	0.301536	0.756491	0.87347	0.491472	0.629848	0.440763	0.711956	0.200074	0.996674	0.989773	0.971021
FALSE	High	Master Protein	TGGT1_252220-t26_1-p1	transcript=TGGT1_252220-t26_1 | gene=TGGT1_252220 | organism=Toxoplasma_gondii_GT1 | gene_product=TPR_REGION domain-containing protein [Source:UniProtKB/TrEMBL;Acc:S7VVZ4] | transcript_product=tetratricopeptide repeat domain containing protein | location=TGGT1_chrIII:391134-397188(+) | protein_length=565 | sequence_SO=chromosome | SO=protein_coding_gene | is_pseudo=false	MSATEAAQALKAKGNAAFQEGKYEDAVGFFTEAIKCTPDDAVLYSNRSGAYASLNKLEEALNDAEMCVKLRPTWGKGYSRKGLAEFRMMKYKEAEATYHKGLQVDPTNEQLKEGLNQVQQQTDQFFSMQAMLAAAQAVNKHPKLAKYQQEDPEYTHRLTEILKQIQKNPQSLKLIMAQPDVRVKEGVIAAMGGDLEEEEELPQSRTAAGPTRGSAENASATKAAAGVKTAEQPAKELTKEEQEAEELKQKGNELYKQKKFEAALEAYDEAIEKNPNEILYLNNKAAVYMELGDYDKCLAECQKALDRRYECKADFSKVAKVYCRMAACKTRSGDYSGAIAMYEKALCEDNNRMTRNALNEVKKLKEKKEKEDYINPALAEQHREKGNEYFKQGDYPAAK…	0	111.666	50	27	65	27	565	63.4	6.51	154.9	27	0.987	1.034	1.006	1.03	1.016	1.065	1.036	1.064	1.045	1.047	-0.02	0.05	0.01	0.04	0.02	0.09	0.05	0.09	0.06	0.07	0.542601	0.459934	0.748882	0.205205	0.197806	0.195638	0.0838133	0.368209	0.00424614	0.0403044	0.996674	0.990049	0.982405
FALSE	High	Master Protein	TGGT1_287500-t26_1-p1	transcript=TGGT1_287500-t26_1 | gene=TGGT1_287500 | organism=Toxoplasma_gondii_GT1 | gene_product=Putative T complex chaperonin [Source:UniProtKB/TrEMBL;Acc:S7UPG8] | transcript_product=putative T complex chaperonin | location=TGGT1_chrV:438209-443517(-) | protein_length=556 | sequence_SO=chromosome | SO=protein_coding_gene | is_pseudo=false	MFANRYGLSGLLKEGHRSFTGIDEVTAKNIDACKALTDLTRTSLGPNSLSKLVVTSLGKRIVTAHTSLIVKELEVQHPAAKMLAMAAEMQQQEFGGAVNLLLVFAGQLLAQAEYLLKQGLHPNDVARGYEMAVAKLPAFLEESVCYTLKSLNDEQALAEVLESTVATKPLCTEGRLHKLVAQAAAMVMPPNNPKDFDVENIRVAKLTGGRLSQSVVLKGMVVTRPPSGSVESKQNCKVMVLGCGLECSTTEAKGTVLVHNAEELKNFTKGEERQMEEIIKGIKDAGVEVIIVHGGAISDVAQHFCNKYDILTLKIQSKFETRRLCRALGATAVVRLGVPTPEELGSCLSITVSEISSKKVTNILTKDSRVCTVVLRGSTPSVLDEAERAIDDAANLVKA…	0	111.246	39	21	64	20	556	59.3	7.5	157.1	21	1.022	1.035	1.038	0.961	0.982	0.995	0.998	0.983	1.002	0.998	0.03	0.05	0.05	-0.06	-0.03	-0.01	0	-0.02	0	0	0.5812	0.576736	0.226126	0.347089	0.13039	0.862206	0.866556	0.297329	0.917325	0.897432	0.996674	0.990049	0.971021
FALSE	High	Master Protein	TGGT1_208030-t26_1-p1	transcript=TGGT1_208030-t26_1 | gene=TGGT1_208030 | organism=Toxoplasma_gondii_GT1 | gene_product=Microneme protein MIC4 [Source:UniProtKB/TrEMBL;Acc:A0A125YP10] | transcript_product=microneme protein MIC4 | location=TGGT1_chrIb:547335-549077(+) | protein_length=580 | sequence_SO=chromosome | SO=protein_coding_gene | is_pseudo=false	MRASLPVHLVVCTQLSAVWFGVAKAHGGHRLEPHVPGFLQGFTDITPAGDDVSANVTSSEPAKLDLSCVHSDNKGSRAPTIGEPVPDVSLEQCAAQCKAVDGCTHFTYNDDSKMCHVKEGKPDLYDLTGGKTASRSCDRSCFEQHVSYEGAPDVMTAMVTSQSADCQAACAADPSCEIFTYNEHDQKCTFKGRGFSAFKERGVLGVTSGPKQFCDEGGKLTQEEMEDQISGCIQLSDVGSMTADLEEPMEADSVGACMERCRCDGRCTHFTFNDNTRMCYLKGDKMQLYSSPGDRTGPKSCDSSCFSNGVSYVDDPATDVETVFEISHPIYCQVICAANPLCTVFQWYASEAKCVVKRKGFYKHRKTGVTGVTVGPREFCDFGGSIRDREEADAVGSDD…	0	110.918	39	19	70	19	580	63	5.22	169.45	19	0.976	1.01	0.996	1.033	1.008	1.043	1.028	0.999	1.004	1.008	-0.04	0.01	-0.01	0.05	0.01	0.06	0.04	0	0.01	0.01	0.373168	0.598654	0.0646973	0.698133	0.889733	0.556168	0.732939	0.940913	0.643859	0.421241	0.996674	0.990049	0.971021
FALSE	High	Master Protein	TGGT1_218960-t26_1-p1	transcript=TGGT1_218960-t26_1 | gene=TGGT1_218960 | organism=Toxoplasma_gondii_GT1 | gene_product=AP2 domain transcription factor AP2XII-1 [Source:UniProtKB/TrEMBL;Acc:A0A125YNZ7] | transcript_product=AP2 domain transcription factor AP2XII-1 | location=TGGT1_chrXII:1115397-1126277(-) | protein_length=2283 | sequence_SO=chromosome | SO=protein_coding_gene | is_pseudo=false	MDSGRDVKDGTAGSRPKDGGDGVGETRASGRESEERSLQLEANECPGAVMSRREDEAEPQSSPSSSPPREEGPQNVDDADSANGSGEAGLQRPPQKRRLEQGLEAEAGVGSSRVEEVEAVCRKRPAFSGVADAFLERPVTLKNSSEEDAARLSGDDAAGASLLCVRSAGALTGDFPSSSSRLPAMLSGARGENAEESVRDAHTPAQDSRDSALASFAPTLAPGQESEYTRAKLWSIEKAFDAFLADQKANGRRQGSRSMREPSHAHPGLSAERETSSGASAATSDLSREDVEELFRQHGVSPRELVRMLSGRRDGPGTSPEELRAAVAWARQLFPAAPRSPSELRMYLQRAVLDRQKRLRERWGAEANPCGDASVYGDEKLREHLSDLSAFMPHLDAGR…	0	110.918	16	34	44	34	2283	247.7	5.91	83.75	34	1.152	1.022	1.004	1.041	1.2	1.064	1.045	0.981	1.076	1.063	0.2	0.03	0.01	0.06	0.26	0.09	0.06	-0.03	0.11	0.09	0.631753	0.861944	0.960785	0.0553917	0.56038	0.652299	0.600532	0.349172	0.484342	0.573408	0.996674	0.997616	0.992295
FALSE	High	Master Protein	TGGT1_293180-t26_1-p1	transcript=TGGT1_293180-t26_1 | gene=TGGT1_293180 | organism=Toxoplasma_gondii_GT1 | gene_product=ELFV_dehydrog domain-containing protein [Source:UniProtKB/TrEMBL;Acc:S7VXB8] | transcript_product=NADP-specific glutamate dehydrogenase | location=TGGT1_chrIa:124576-129868(-) | protein_length=578 | sequence_SO=chromosome | SO=protein_coding_gene | is_pseudo=false	MTIPTYADGSRCHGPQRGTVLSRRRSSEIRREQKQHTVLHTFVPSGDTAYFKSCGCIFNTPRLGHPHNWLVTCLVFRFLCYLVVAFSAKMITDKNLSVVTPPELVTDDPGDMPDCKISPRCQSEASEVADPEEVDAFVKQIETANRFQPEFLQAFHEVFDSVRPVLCSNPKYLRAFKVIVEPERCITFRVPWVDDQGKQHVSRGYRVQYSSAAGPYKGGLRFHPSVTLSVMKFLGFEQIFKNSLTGLSIGGAKGGSDFDPKGRSDNEVMRFCQAFMTELSRYIGPNRDVPAGDIGVGAREIGYLFGQYKLLKAGQFEGALTGKDKNWGGSAMRPEATGYGCVYFVLELLKAQNKEGIKGMRCAISGSGNVALYAGEKLATLGAKVMTFSDSSGYIVNEK…	0	110.604	37	19	60	19	578	63.8	8.18	139.24	19	0.979	0.986	0.972	1.017	0.995	1.003	0.988	1.017	0.982	1.013	-0.03	-0.02	-0.04	0.02	-0.01	0	-0.02	0.02	-0.03	0.02	0.247857	0.0971491	0.0323767	0.502363	0.663678	0.91441	0.579157	0.494165	0.0952074	0.668921	0.996674	0.989773	0.971021
FALSE	High	Master Protein	TGGT1_309120-t26_1-p1	transcript=TGGT1_309120-t26_1 | gene=TGGT1_309120 | organism=Toxoplasma_gondii_GT1 | gene_product=Ribos_L4_asso_C domain-containing protein [Source:UniProtKB/TrEMBL;Acc:A0A125YTR1] | transcript_product=ribosomal protein RPL4 | location=TGGT1_chrXI:476484-477734(-) | protein_length=416 | sequence_SO=chromosome | SO=protein_coding_gene | is_pseudo=false	MATARPLVSVYKPEDGTASGTSLMPSVFLSPLRPDLVRFVHTNMAKNRRQPYGVAPNAGYQTSAESWGTGRAVSRIPRVPGGGTHRAGQAAFGNMCRGGGMFAPNKTWRRWHRKVNVTQKRHAVASAVAATGLPALVMARGHRIDEVPELPLVVSEKLEKVSKTREAVKILETLGCTAELERVRASAKKLRAGKGKMRGRRTHMRRGPLVVYAEDNGVTRAFRNIPGVELCKVDSLNLLQLAPGGALGRFCLYTASAFKRLQLLFGRHTGTGTAQLKKGYHLPRALMSNADLSRIVNSEEIQRVVRPARVAPQKKRGQKKNLLKNHAVLCRVNPAARNLKILARLAQTEGTKQRALVLRKKQANREEHKKHRQSARRFAAEIRQAFSDKMAAELEAAAR…	0	110.517	39	18	82	18	416	45.7	11.18	177.48	18	0.999	1.002	1.001	1.022	1.021	1.024	1.023	0.988	0.997	1.013	0	0	0	0.03	0.03	0.03	0.03	-0.02	0	0.02	0.963642	0.94979	0.983515	0.430899	0.642048	0.137716	0.194076	0.533719	0.472944	0.67006	0.999123	0.998909	0.998307
FALSE	High	Master Protein	P08133	Annexin A6 OS=Homo sapiens (Human) OX=9606 GN=ANXA6 PE=1 SV=3	MAKPAQGAKYRGSIHDFPGFDPNQDAEALYTAMKGFGSDKEAILDIITSRSNRQRQEVCQSYKSLYGKDLIADLKYELTGKFERLIVGLMRPPAYCDAKEIKDAISGIGTDEKCLIEILASRTNEQMHQLVAAYKDAYERDLEADIIGDTSGHFQKMLVVLLQGTREEDDVVSEDLVQQDVQDLYEAGELKWGTDEAQFIYILGNRSKQHLRLVFDEYLKTTGKPIEASIRGELSGDFEKLMLAVVKCIRSTPEYFAERLFKAMKGLGTRDNTLIRIMVSRSELDMLDIREIFRTKYEKSLYSMIKNDTSGEYKKTLLKLSGGDDDAAGQFFPEAAQVAYQMWELSAVARVELKGTVRPANDFNPDADAKALRKAMKGLGTDEDTIIDIITHRSNVQRQ…	0	110.318	42	29	57	29	673	75.8	5.6	111.67	29	0.998	1.004	1.003	1.005	1.003	1.008	1.007	1.037	1.042	1.043	0	0.01	0	0.01	0	0.01	0.01	0.05	0.06	0.06	0.893859	0.796928	0.725924	0.772361	0.460425	0.783663	0.452799	0.383864	0.622909	0.352428	0.996674	0.995152	0.980327
FALSE	High	Master Protein	TGGT1_259550-t26_1-p1	transcript=TGGT1_259550-t26_1 | gene=TGGT1_259550 | organism=Toxoplasma_gondii_GT1 | gene_product=Pterin-binding domain-containing protein [Source:UniProtKB/TrEMBL;Acc:A0A125YWG2] | transcript_product=dihydropteroate synthase | location=TGGT1_chrVIIb:2750606-2755609(-) | protein_length=748 | sequence_SO=chromosome | SO=protein_coding_gene | is_pseudo=false	MGCWPPSFACLRLSWWNLPLFHKRSAFFFWPPPGLRLRSLPGGAIAHCASSRSFSFGLLQSKFSHFFTRFHQGTMTANSHFLQKMREEDPGKEYATAYIALGSNLQGDARLGIIEEAISELGRCLGPILGTSCLYETVPAFDVCPKGVVHDVFHPFYLNAVVKLRTPITDPWYVLEILKNLEAKTGRPLPTPEDMEAALNDCTSSGEATNEDVPGQGNKGASRKGDWKEALKKDKYVRGAPRLLDLDLLFFDKNGRSVVIHPDVRPVDKQWPLTLPHPRIITRNFVLFPLCDLDPEYIHPVEGMSVKELLRINLERRRIHLLNAAEEARQTQELAAKTNSETSGDHIACSHRCAPPASLHFVHNYRIDGSLAIPRRCFAATTEELWTLGGDAGIVDTLL…	0	110.091	32	19	49	19	748	82.7	6.58	125.77	19	0.972	0.959	0.975	1.038	1.01	0.996	1.012	1.025	1.023	1.019	-0.04	-0.06	-0.04	0.05	0.01	-0.01	0.02	0.04	0.03	0.03	0.382595	0.449525	0.320815	0.385578	0.394266	0.744189	0.499833	0.288114	0.448059	0.136655	0.996674	0.990049	0.971021
FALSE	High	Master Protein	TGGT1_221670-t26_1-p1	transcript=TGGT1_221670-t26_1 | gene=TGGT1_221670 | organism=Toxoplasma_gondii_GT1 | gene_product=Transcriptional elongation factor FACT140 [Source:UniProtKB/TrEMBL;Acc:S7ULL0] | transcript_product=transcriptional elongation factor FACT140 | location=TGGT1_chrII:521099-534404(-) | protein_length=1198 | sequence_SO=chromosome | SO=protein_coding_gene | is_pseudo=false	MASSEEGAPPIEAKMEMKREPDAEPPSVPAASLAAPEEKVVPNGASPTVPVKTQEAKEEGRGGARTVAIDGGDVKEKLDRLFSYWDSCYGVEGDSWHGVDAFVILVGKASEEEEGKAEQMQMWLTGFQFPETLFVFTRTGEWWVLTSPKKLEHLRQVESCREGIFLLSRADGLPEAMEKIHQAIGRAAAAAGKNADEASIGCLQQSASLSQGGGFGQQVSDSLLRKFTESNRSKFVDDGIVATMAVHTRVEIENIRSASVVCVAMVKTQIVNRIETVLDNEQQESHAAIADLAEKLLKDGKQIEKLREKRNIDPSEVDLLYSNVQSGDVFDLRASAQPTNANLSQSEGSIIVSLGVKYKELCAAVARTLLLNGTKEQKEVYSFTFELLNYVISLLKPGA…	0	110.074	25	25	35	25	1198	134.5	5.21	92.19	25	0.974	1.01	0.983	1.009	0.982	1.019	0.991	1.013	1.007	0.989	-0.04	0.01	-0.03	0.01	-0.03	0.03	-0.01	0.02	0.01	-0.02	0.498743	0.234997	0.161844	0.202209	0.588554	0.220089	0.119618	0.564294	0.738448	0.392011	0.996674	0.989773	0.971021
FALSE	High	Master Protein	TGGT1_288650-t26_1-p1	transcript=TGGT1_288650-t26_1 | gene=TGGT1_288650 | organism=Toxoplasma_gondii_GT1 | gene_product=Dense granule protein GRA12 [Source:UniProtKB/TrEMBL;Acc:S7VY87] | transcript_product=dense granule protein GRA12 | location=TGGT1_chrIX:2467879-2469672(-) | protein_length=436 | sequence_SO=chromosome | SO=protein_coding_gene | is_pseudo=false	MRAIMASTQQFLRPVGSRPLAGISVVVVVALAIALGTAADVGRHVGGFSGPFPMTLRSGQWRLDHGACFVGKAKNLVVDPLPRVSPQGPQPLDVTTTGSALCWWLDSMYAAHMSLKAAWEKRHQEAKNRTSWLNLWRRFANWWASFPEFQIDVSVLYLDLWNDDFYGHPLPWFSAEFSYTPPSGRYAYNLFDKLQSHFASAPGTAVQEVFLLLAPAPTFNQPVEKRSSIVARAATVAAGNELFKEALGHQRVDEVLSMVPADPFRLMLSTSAFSFQAKIGDFWERGLDCMLGSRLNLRWDQVGTSVCRYMTAKASETGSGLAASFLNTVEVRVTGMDFFNHAAPVFKTEFIEGIITKRATYIPVSMYLSTDPTLTHEYEAAKTVKRAVQAGRVGAALAR…	0	109.902	41	15	80	15	436	47.9	9.2	195.18	15	1.01	0.994	1.003	1.013	1.023	1.007	1.017	0.988	0.996	1.017	0.01	-0.01	0	0.02	0.03	0.01	0.02	-0.02	-0.01	0.02	0.498464	0.661181	0.799	0.853693	0.710475	0.901912	0.79059	0.609689	0.901352	0.53057	0.996674	0.990049	0.984106
FALSE	High	Master Protein	TGGT1_313370-t26_1-p1	transcript=TGGT1_313370-t26_1 | gene=TGGT1_313370 | organism=Toxoplasma_gondii_GT1 | gene_product=hypothetical protein | transcript_product=hypothetical protein | location=TGGT1_chrXI:3281764-3287206(+) | protein_length=1687 | sequence_SO=chromosome | SO=protein_coding_gene | is_pseudo=false	MSANPCPLPAPSVLFGRHSRFSSALRFDRSSVNGASSLVADGSRSRGAGTQQHVSMHVSLQRKNLRDADIREFVQWLAASLQQQLRQFPPVGRSAPLLPGGVGAGAGPSVSASAPAVSGAKPASGAAKSEPAESEGEWPGAGEAPTGEALSPFLFTCCLDVSENLITAEGLSHLLGFFQAHPGSFRLAKLKLYKNRLGDAGARVLAAFIQPSLLPTTSSSSSLRRSGARAGKPSPSPPPALEELHLSHCDITAKGCLSLLDAVAAVVDDKGRYLYPRYDQVRRCLVPLWLRLEYNHINDPLGLLKQWSANLKDKRPLPSTGAGASASAGGAPLSFACFAEKLPLSSSGGRAASALGTSADGSAYFHCTPARCCRATSTFAPIFHVYMVTHQSSGVAPTP…	0	109.577	20	23	38	23	1687	174.5	7.69	88.74	23	0.98	1.009	1.009	1.016	0.996	1.026	1.026	1.002	1.057	1.063	-0.03	0.01	0.01	0.02	-0.01	0.04	0.04	0	0.08	0.09	0.547896	0.913471	0.576653	0.454037	0.744301	0.709441	0.0605365	0.971137	0.408632	0.264854	0.996674	0.998909	0.975418
FALSE	High	Master Protein	TGGT1_226730-t26_1-p1	transcript=TGGT1_226730-t26_1 | gene=TGGT1_226730 | organism=Toxoplasma_gondii_GT1 | gene_product=Aconitate hydratase ACN/IRP [Source:UniProtKB/TrEMBL;Acc:S7UWQ3] | transcript_product=aconitate hydratase ACN/IRP | location=TGGT1_chrX:1308814-1316049(-) | protein_length=1055 | sequence_SO=chromosome | SO=protein_coding_gene | is_pseudo=false	MRILVPLVFLAAQIPPASLERVSVSGFFPRALLFRRVPLPRPICTARCLEVAQARRPRNPFLLPVSSFLLPGSMKALSNIVLPRKGISVAARSTASATAASQPLPRNSRALSKACALPASQAFEGSRRSAGAKEAHVPERHTRLHSALTQSRKMSTSRGNPFAYVAKTLAGTEKTYYDIGALQDDRLKTLPFSIRVLLESAVRNCDGFSIKPEDVQTILDWQKASQAQKEIPFMPARVLLQDFTGVPAVVDLAAMRDAMARLGGPPSSINPLVDVDLVIDHSVQVDFSRSPEAFEKNLAKEMERNSERFSFLKWGSTAFSNMLIVPPGSGIVHQVNLEYLARVVMDKKVGDRAVLYPDSLVGTDSHTTMINGLGVVAWGVGGIEAEAVMLGQQISMVLP…	0	109.493	25	26	75	26	1055	114.8	8.37	173.9	26	1.019	1.018	1.015	0.975	0.994	0.993	0.99	0.997	0.976	0.996	0.03	0.03	0.02	-0.04	-0.01	-0.01	-0.02	0	-0.04	-0.01	0.34537	0.0547776	0.478985	0.0229798	0.675296	0.217653	0.566663	0.527796	0.344143	0.84545	0.996674	0.989773	0.973444
FALSE	High	Master Protein	TGGT1_249900-t26_1-p1	transcript=TGGT1_249900-t26_1 | gene=TGGT1_249900 | organism=Toxoplasma_gondii_GT1 | gene_product=Putative adenine nucleotide translocator [Source:UniProtKB/TrEMBL;Acc:A0A125YLS5] | transcript_product=putative adenine nucleotide translocator | location=TGGT1_chrXII:4873424-4874380(+) | protein_length=318 | sequence_SO=chromosome | SO=protein_coding_gene | is_pseudo=false	MAAPTVSAGGKEKKGNADSQLMNTAKDFLAGGISAGVSKTIVAPIERVKMLIQTQDSIPEIKEGKIPRYTGIVDCFRRVSAEQGVASLWRGNMANVIRYFPTQAFNFAFKDTFKRMFPRYDQKKEFWKFFCTNVASGGLAGASSLVIVYPLDFARTRLASDVGKGNEREFTGLVDCLGKIFRRTGFFSLYQGFGVSVQGIIVYRGAYFGLFDTAKAMLFGPNNDANLFYKWAVAQTVTAAAGVASYPFDTVRRRMMMMAGRKKGEQEIQYTGTADCWKKVYQQEGFKGFFKGAWANVLRGAGGALVLVFYDELKKMLM	0	109.465	51	17	74	17	318	35.2	9.74	188.28	17	1.009	0.993	1.029	0.984	0.993	0.977	1.013	1	1.006	1.018	0.01	-0.01	0.04	-0.02	-0.01	-0.03	0.02	0	0.01	0.03	0.594812	0.443778	0.123734	0.340244	0.813335	0.375538	0.555712	0.988929	0.814976	0.593488	0.996674	0.990049	0.971021
FALSE	High	Master Protein	TGGT1_256980-t26_1-p1	transcript=TGGT1_256980-t26_1 | gene=TGGT1_256980 | organism=Toxoplasma_gondii_GT1 | gene_product=PlsC domain-containing protein [Source:UniProtKB/TrEMBL;Acc:S7UZ60] | transcript_product=glycerol-3-phosphate-acyltransferase | location=TGGT1_chrVIIb:4232332-4243743(-) | protein_length=1002 | sequence_SO=chromosome | SO=protein_coding_gene | is_pseudo=false	MYFLVRWLCIGIVRSFFKEVAVLHPERIPLYGPAIFVGNHNNQFMDASMLVANIPRQVHFLVALKSMKRRVIGFLSRLAGCIPVDRQDDRAFKGPGLVRISHHFTEDGHVCPRPPHHHHHARPHAADPGHSNGSESREKRDGGGGRPPETATEERQTPHADTGALHTPSGAVQAGSIPLSGEAEAARRSAFEETAGGTSEARMETKNEEDPREPQTREEGPSAESAAIPEAQTPELRAHTRGESPAKLLAGEMLQAFSRVPSHPSLRTEMPLFSKSASAPLGMQNPPVLSILGNSTRFLSDVRPGYKLRLDGKDFLVLRVLSDTHVVVRQPPEAPRRLDSSPLPTAAAPGGRTPETAGAVCELDRKTAERRGDAVARQANAQLAKEKESEREAKMGRRR…	0	109.24	28	25	38	25	1002	110.2	8.78	100.73	25	1.013	1.008	1.027	0.953	0.966	0.96	0.979	0.944	0.998	0.997	0.02	0.01	0.04	-0.07	-0.05	-0.06	-0.03	-0.08	0	0	0.387005	0.3578	0.0244267	0.133348	0.326236	0.224796	0.3137	0.0873375	0.848501	0.919086	0.996674	0.990049	0.971021
FALSE	High	Master Protein	TGGT1_310750-t26_1-p1	transcript=TGGT1_310750-t26_1 | gene=TGGT1_310750 | organism=Toxoplasma_gondii_GT1 | gene_product=GOLD domain-containing protein [Source:UniProtKB/TrEMBL;Acc:S7W275] | transcript_product=emp24/gp25L/p24 family protein | location=TGGT1_chrXI:1533084-1537096(+) | protein_length=601 | sequence_SO=chromosome | SO=protein_coding_gene | is_pseudo=false	MKALLVLSALLAACLQGRLASAADQTDGVPPDSQQYYQNYQQNQYYAPEEENGVPPPPPVNTYGSADVGSNAGGTPPAAAPYYPPPQQQGYVPQDQQGYAPPAQQGYNAPPQVPPSHQVPPQYQQQYAPQYQQQRHPGYAQQYAGGVPPQQAQGGYQQNRPVPGPQGGSGYGAPAPVGQQAPPPPQYKAPPPQGTPQQGYPQGGARAPPPASARTGQPAPAAAAPGYQTQRQGQQPQRPAPAGQVPQAGQPAPARQQQRPTPPAQQPRQSPPPPQQTPQQTQQRTPSQQTQQQRAAAPQQARQAPAASQQQRPVQTGGANQGAGTPRAGVQTPQAGVGAGVQTPQAQGGATQQRQQAQRAAPQRAEMKPAAPDEDSEEEEGDLEERIRREDEGQLFDDD…	0	108.634	38	13	40	13	601	64.9	5.85	111.86	13	1.038	1.059	1.03	0.957	0.993	1.014	0.985	1.062	1.047	1.078	0.05	0.08	0.04	-0.06	-0.01	0.02	-0.02	0.09	0.07	0.11	0.110236	0.207637	0.293391	0.152188	0.749915	0.72785	0.666296	0.437019	0.00889246	0.429447	0.996674	0.989773	0.971021
FALSE	High	Master Protein	TGGT1_203310-t26_1-p1	transcript=TGGT1_203310-t26_1 | gene=TGGT1_203310 | organism=Toxoplasma_gondii_GT1 | gene_product=Dense granule protein GRA7 [Source:UniProtKB/TrEMBL;Acc:A0A125YVB8] | transcript_product=dense granule protein GRA7 | location=TGGT1_chrVIIa:2502941-2503651(+) | protein_length=236 | sequence_SO=chromosome | SO=protein_coding_gene | is_pseudo=false	MARHAIFSALCVLGLVAAALPQFATAATASDDELMSRIRNSDFFDGQAPVDSLRPTNAGVDSKGTDDHLTTSMDKASVESQLPRREPLETEPDEQEEVHFRKRGVRSDAEVTDDNIYEEHTDRKVVPRKSEGKRSFKDLLKKLALPAVGMGASYFAADRLVPELTEEQQRGDEPLTTGQNVGTVLGFAALAAAAAFLGMGLTRTYRHFSPRKNRSRQPALEQEVPESGEDGEDARQ	0	108.521	55	12	82	12	236	25.8	5.22	193.05	12	1.065	1.051	1.05	0.99	1.054	1.04	1.039	0.996	0.975	0.964	0.09	0.07	0.07	-0.01	0.08	0.06	0.06	-0.01	-0.04	-0.05	0.261782	0.550339	0.401783	0.83122	0.567879	0.751299	0.691966	0.415241	0.170048	0.383079	0.996674	0.990049	0.971021
FALSE	High	Master Protein	TGGT1_263060-t26_1-p1	transcript=TGGT1_263060-t26_1 | gene=TGGT1_263060 | organism=Toxoplasma_gondii_GT1 | gene_product=RPN2_C domain-containing protein [Source:UniProtKB/TrEMBL;Acc:S7UY70] | transcript_product=Proteasome/cyclosome repeat-containing protein | location=TGGT1_chrVIIb:808221-820240(-) | protein_length=988 | sequence_SO=chromosome | SO=protein_coding_gene | is_pseudo=false	AASAALNDAVEGVVRRLLEVCTEHGEGASYALGIAFDARRLDLVESILNSPRAIALPPTQPNSKCQLMLYCLDHVQTLISSKYFRSQIISLLTAEFEKCLPVYASGDAESTQKLSAEEQAEVRGLLFSGLCRCLVEQDASGRVAEILHQLLQESSGAEGLLMASQIAFDILQMENQSFQQALLDHPLLRAPEAPAGDPENSGESGERSTANGDAPAPDAEKKEENKEEKKEETKAEKKDPEEETEAEKKKKLLRSILSGEAQTAFSNQFLQRENHTDLMLLDLYKRSIDTRSSLLHHGVVLSHMLMQAGTSCDVFLRCNLDWMARANNWARFSATASLGVIHKGHVRDSMKLLRTYLPASASSAASSSPYSEGGAFYALGLISANQPSTSVRDYLLEQL…	0	108.362	21	19	51	19	988	107.1	5.25	122.05	19	0.977	0.987	1.013	1.045	1.021	1.032	1.058	1.06	1.081	1.113	-0.03	-0.02	0.02	0.06	0.03	0.05	0.08	0.08	0.11	0.15	0.761158	0.387736	0.152255	0.333223	0.662118	0.526378	0.23996	0.386438	0.0574237	0.125427	0.996674	0.990049	0.971021
FALSE	High	Master Protein	TGGT1_214840-t26_1-p1	transcript=TGGT1_214840-t26_1 | gene=TGGT1_214840 | organism=Toxoplasma_gondii_GT1 | gene_product=AP2 domain transcription factor AP2X-7 [Source:UniProtKB/TrEMBL;Acc:S7UQH1] | transcript_product=AP2 domain transcription factor AP2X-7 | location=TGGT1_chrX:6426532-6432141(+) | protein_length=1869 | sequence_SO=chromosome | SO=protein_coding_gene | is_pseudo=false	MEAMAEPTPPAPGGEILRDAVRMETPLPEKSVGADLSSESVANTEEERGTSLPDPAAQLQDADLSSGDLAADRSTEIALSTQLQLEQLDALQRHVQKQLLAGVSSLATESEKLQTGEVGAPFAGVSGDSGDSEEGREALASKTGEAPDAAEKGPAAAHFKAKGWGNDAGLAALSGGTTVEEEGENSSSSLGFSASSPGGQGSGEDTSALLPATSAVKQGTQDDLRLLVLQESMIKGTPGVALPTLEGAGGRVTPSASDQTFSSIQFAEEAQSPQKPTTLPALLTAGKRTRRGQAATGSDAAEGEAKALASPSALRFCGENPQSSLSTPQDVDAHGQSTEATPASSVHASGERKAKREEPEPMKTRRLARAAAQAAALAAASSGGQDGAASVKDGKTDLS…	0	108.199	14	22	38	22	1869	183.9	5.15	101.8	22	0.969	0.988	0.946	1.073	1.039	1.06	1.015	1.052	1.016	0.999	-0.05	-0.02	-0.08	0.1	0.06	0.08	0.02	0.07	0.02	0	0.655385	0.884477	0.469424	0.571935	0.475045	0.253444	0.76064	0.567069	0.812707	0.982894	0.996674	0.998909	0.973444
FALSE	High	Master Protein	TGGT1_313140-t26_1-p1	transcript=TGGT1_313140-t26_1 | gene=TGGT1_313140 | organism=Toxoplasma_gondii_GT1 | gene_product=Iso_dh domain-containing protein [Source:UniProtKB/TrEMBL;Acc:S7W894] | transcript_product=isocitrate dehydrogenase | location=TGGT1_chrXI:3095680-3101525(-) | protein_length=621 | sequence_SO=chromosome | SO=protein_coding_gene | is_pseudo=false	MRAENSGFSQKSVRFWTPLESVQPRTACSFSLCLLWKVCLLSCGVLRTHLRTRSASISRVGGAFQTFPTNRPCVFSKKMASALRRITARAASPAFPFTSVQSSTFARALSTKSACVRPQLLSSALCNTVSSTSSSASSGLAVSPVQKSGNPDASPRFFASAASVATGGAFNLEGKIHVANPVVEMDGDEMTRILWAWIKEKLLFPYVEIPLEYYDLSVTNRDQTEDKVTLEAAEAIKKCHVGIKCATITPDEGRVKEFNLKKMWKSPNGTIRNILDGTVFRAPILISNVPRLVPGWKKPIVIGRHAYGDQYKAESLVCDGPGDFTISFTPAGGSRVEKKVFSFSGPGVMLGMYNTEDSIRGFALSSFKFALQQNMPLYLSTKNTILKQYDGMFKDIFQS…	0	107.954	33	18	48	17	621	68.3	8.59	148.92	18	0.971	0.97	0.97	1.057	1.026	1.025	1.026	1.054	1.053	1.031	-0.04	-0.04	-0.04	0.08	0.04	0.04	0.04	0.08	0.07	0.04	0.582145	0.509246	0.261853	0.59052	0.599937	0.663443	0.748973	0.535231	0.237248	0.530082	0.996674	0.990049	0.971021
FALSE	High	Master Protein	TGGT1_278830-t26_1-p1	transcript=TGGT1_278830-t26_1 | gene=TGGT1_278830 | organism=Toxoplasma_gondii_GT1 | gene_product=Glucose-6-phosphate 1-dehydrogenase [Source:UniProtKB/TrEMBL;Acc:S7UZN8] | transcript_product=glucose-6-phosphate 1-dehydrogenase | location=TGGT1_chrXII:5748919-5762087(+) | protein_length=878 | sequence_SO=chromosome | SO=protein_coding_gene | is_pseudo=false	MYLPSKIGQKGDEVDKMKSANEEASPSGSSSGRSTKSSGVFPTFSVAAIPPRAAVSSLATRGIFDLSERPKEISCRNDDAFVAHGAYLLFNAIKRKLTESSYAKVVIGLSGGSTPLPIYSALRHLALASADHEPGRAATHLATAVPEFSEELQRDAKGSDSALDWTRVFFFLVDERYVHPTHADSNQRSIRKHLLGQPNGVACDQPGAECGGDVLPVPEKNLIFPDTSLPLEDCIVKYRSALLELLAATQQIDLVTLGLGPDGHIASIFPPLSEEDLKEQMNPNPIVLHTTTSRFAGFDRITVSLQLLCGAHQKVFFLKGDEKIRLWRDMQDDARSKSVAEFPALAVLQSGNVKVVAVPPLDVHEEHLQQQLRADRTFLSVVVLGASGDLAHKKTYPAL…	0	107.868	36	24	43	22	878	98.2	7.25	109.69	24	0.981	0.957	1.016	1.017	0.998	0.973	1.033	1.032	1.031	0.988	-0.03	-0.06	0.02	0.02	0	-0.04	0.05	0.05	0.04	-0.02	0.528317	0.0396418	0.71296	0.599207	0.963993	0.404338	0.663424	0.315965	0.289864	0.321908	0.996674	0.989773	0.980327
FALSE	High	Master Protein	TGGT1_287480-t26_1-p1	transcript=TGGT1_287480-t26_1 | gene=TGGT1_287480 | organism=Toxoplasma_gondii_GT1 | gene_product=hypothetical protein | transcript_product=hypothetical protein | location=TGGT1_chrV:410863-428566(+) | protein_length=4703 | sequence_SO=chromosome | SO=protein_coding_gene | is_pseudo=false	MTAPPVSVAPGAPSPPAPYFPASLVPATAASHLQAAVRLIQEAQALHQLPALSAQDNVGKEKEKVHSQSNEMLPVRPNHAGASARLVKVLLLLGDFGSAAHALKYSLSLGLSASGGRSASKIRWLLRALGSTVIEGRNEHDRERQQYITERKADGRGQAEAEVNKADVNRERRMMMGPADLTGGEKNEEEHMENIFHMQFLRQDRIRIHRQLEELQREDASVLSHARMSSSSMPISLSLPPSPSVSSHEEDPRGVFTLLTFLYNIILAVDEALEVDSGTAAPFSNPPATPALCRMVTVSRASSPLPVPKLVERQLSEATRQLAEIFSPFYSGLSRAATSSVSPGGGCSSPCPAAVPPPRPPAKALASRQGGENEGFTHSGLPQVLEEKGKRGACVPESP…	0	107.712	8	31	36	31	4703	502.4	6.48	57.21	31	1.019	1.042	1.029	0.973	0.992	1.013	1.001	1.015	1.06	1.015	0.03	0.06	0.04	-0.04	-0.01	0.02	0	0.02	0.08	0.02	0.535416	0.289695	0.30855	0.51966	0.896537	0.834369	0.94434	0.634126	0.0729802	0.168959	0.996674	0.989773	0.971021
FALSE	High	Master Protein	TGGT1_225690-t26_1-p1	transcript=TGGT1_225690-t26_1 | gene=TGGT1_225690 | organism=Toxoplasma_gondii_GT1 | gene_product=hypothetical protein | transcript_product=hypothetical protein | location=TGGT1_chrX:2025685-2031135(+) | protein_length=1816 | sequence_SO=chromosome | SO=protein_coding_gene | is_pseudo=false	MALPRLPSKESNALTRHDSSNTAYFQDYWSENSSDSGLSQGQDNACTPLCGNGGRVRGFQASVVVPPPAPSPGHQTGQFTTLSHPSQYETVTAAHEGGGVPQHQQESSLHHSSVCHIPPGSQCSPLQRSAVDLTSASAGGHSPSGYSRPQQLPIRDHLSSQANSLFVSAANGHLVTQSQGQAKVENPTNHIQPTLAHNGDAGNPASRGTGAERPETKKGKRSQGKKAGEGASRGKGTPQNTASRTKGNEQQPQGASGKQDASKQKRTTLKRNPAGKPELAGVSAKSLPVGDASMGAEAARGVAISADYLKRNQQEDSGVAPSPSEAAVTTQSGGEGSRISAGISPAQNLPGSSAAGASKGVVALAHDITPGWGMLPAEAQHYSATTSQQQREWKSLKES…	0	107.525	18	26	40	26	1816	194	6.13	106.15	26	0.985	1.022	0.987	0.997	0.983	1.019	0.984	1.016	1.015	1.002	-0.02	0.03	-0.02	0	-0.03	0.03	-0.02	0.02	0.02	0	0.730588	0.42052	0.420027	0.711462	0.640473	0.34522	0.190137	0.286968	0.491436	0.88454	0.996674	0.990049	0.973444
FALSE	High	Master Protein	TGGT1_219320-t26_1-p1	transcript=TGGT1_219320-t26_1 | gene=TGGT1_219320 | organism=Toxoplasma_gondii_GT1 | gene_product=Acid phosphatase GAP50 [Source:UniProtKB/TrEMBL;Acc:S7V1S3] | transcript_product=acid phosphatase GAP50 | location=TGGT1_chrXII:907511-910397(-) | protein_length=431 | sequence_SO=chromosome | SO=protein_coding_gene | is_pseudo=false	MAGAPVAAAPAASSRVAGDSGRSRALSSFFSVFSLCVFSVFLATPTAVVAQLKFVGLGNWGSGSYGQKTVADTLKKVAANEHISFIASPGSNFLGGVSSLNDTRWQSEFEIVYSDANGALKMPFFTVLGVDDWSRNYTSEALRTELTYAVTSEQIKDGKLAPADATEAAAAENHGYPKWTLPNWWYHYLMHFPANTGGAFINSGHKDMSVGMIFIDTWVLSSSFPFSNVTSRAWADLEKTLELAPKILDYIIVVADRAVYSSGASKGDSMLQYYLQPLLKKANVDAYISGYDFSLEVISDDNISHVSCGAGSKAAGSPIVKHSGSLYYAGETGFCLFELTAEGLVTRLVSGTTGETLYTHKQPLKNRPERKSIDAFNFVSQLPEVRYYPVPEMGKMPGR…	0	107.468	36	14	60	14	431	46.6	6.95	183.16	14	1.022	0.998	1.022	0.995	1.017	0.992	1.017	1.01	0.993	1.004	0.03	0	0.03	-0.01	0.02	-0.01	0.02	0.01	-0.01	0.01	0.0763492	0.880408	0.511025	0.203972	0.163688	0.676211	0.572078	0.788934	0.753136	0.728954	0.996674	0.998909	0.973444
FALSE	High	Master Protein	Q9NZM1	Myoferlin OS=Homo sapiens (Human) OX=9606 GN=MYOF PE=1 SV=1	MLRVIVESASNIPKTKFGKPDPIVSVIFKDEKKKTKKVDNELNPVWNEILEFDLRGIPLDFSSSLGIIVKDFETIGQNKLIGTATVALKDLTGDQSRSLPYKLISLLNEKGQDTGATIDLVIGYDPPSAPHPNDLSGPSVPGMGGDGEEDEGDEDRLDNAVRGPGPKGPVGTVSEAQLARRLTKVKNSRRMLSNKPQDFQIRVRVIEGRQLSGNNIRPVVKVHVCGQTHRTRIKRGNNPFFDELFFYNVNMTPSELMDEIISIRVYNSHSLRADCLMGEFKIDVGFVYDEPGHAVMRKWLLLNDPEDTSSGSKGYMKVSMFVLGTGDEPPPERRDRDNDSDDVESNLLLPAGIALRWVTFLLKIYRAEDIPQMDDAFSQTVKEIFGGNADKKNLVDPFV…	0	107.461	20	37	46	37	2061	234.6	6.18	80.86	37	0.962	1.042	1.043	0.984	0.946	1.025	1.026	0.948	1.034	0.971	-0.06	0.06	0.06	-0.02	-0.08	0.03	0.04	-0.08	0.05	-0.04	0.321512	0.163798	0.0568756	0.802711	0.314939	0.660181	0.689347	0.287551	0.226482	0.48684	0.996674	0.989773	0.971021
FALSE	High	Master Protein	TGGT1_290640-t26_1-p1	transcript=TGGT1_290640-t26_1 | gene=TGGT1_290640 | organism=Toxoplasma_gondii_GT1 | gene_product=DNA mismatch repair protein [Source:UniProtKB/TrEMBL;Acc:S7UQA4] | transcript_product=putative DNA mismatch repair protein MSH6-1 | location=TGGT1_chrIX:3604395-3616262(-) | protein_length=1561 | sequence_SO=chromosome | SO=protein_coding_gene | is_pseudo=false	MSPQLTKAAPASARSGGARRSGGSIYETAGKKQASILSFFSRQPPASASAPASGKAPERRDASSEKATEETSQAASAGAAAAKNAKEEMSTRKVRRFSEGVFCKRQDDEDAPRGAVGSPEKNKDAVQKTEMRNNTTEPAEDEKKRQRASVGDSTAARSSSGNEEDPGSEDVRKLKRLRRRLALSDDEEKMETPPSIRRRRQAEQTKKVEKEAARRAKPEEEEEEEEDEEEEEESEPSAFSDESYEDESEEESEDDSEDEEEEEEEEEEEEEEEEEEEEEEEVRGKKRPAPKKEKRVEEGSQTTWTTAASSASSSSRAKLKDLVYSASSEKPGTTSSLTPPPVTSPPSSSPPAAPEPTSSSSSLSSSLSSSSVSSSSVSSSSVSSSSVSSSSRLPCSTGR…	0	107.04	21	30	41	30	1561	171.9	5.26	98.75	30	0.969	0.98	1.036	1.03	0.999	1.01	1.067	0.967	1.018	1.041	-0.04	-0.03	0.05	0.04	0	0.01	0.09	-0.05	0.03	0.06	0.211311	0.390316	0.241741	0.561578	0.962263	0.880358	0.206439	0.452176	0.757257	0.381563	0.996674	0.990049	0.971021
FALSE	High	Master Protein	TGGT1_313380-t26_1-p1	transcript=TGGT1_313380-t26_1 | gene=TGGT1_313380 | organism=Toxoplasma_gondii_GT1 | gene_product=hypothetical protein | transcript_product=hypothetical protein | location=TGGT1_chrXI:3292372-3294103(+) | protein_length=274 | sequence_SO=chromosome | SO=protein_coding_gene | is_pseudo=false	MGQKLTVEERRNIKREVYMIYPGLEQQLEMAFTCHDLQHEGKLPYTTLEPIIRHLLMQYGLIEYVTRFSDSEGCLDANQIRAELNEFGVNTGGLCCGSSLTLEDFKSLAVIWLRKILDCHADDQAVWMAKLKAEQEEQAEAYTRAMREFQDTFTQQHALYQQGLQEQQKQINDWNKLLEDAQKTQQTIYEQEVRRMEEARLKEATAAEEAMKEQIDLISQYKEKLEKIAAADTSGKCFVYPAAATPYGACASAGAQEPTRRRRVKKEHPSRACC	0	106.669	49	12	61	12	274	31.5	5.58	194.09	12	0.997	1.017	1.002	1.012	1.009	1.029	1.014	0.998	0.995	1.009	0	0.02	0	0.02	0.01	0.04	0.02	0	-0.01	0.01	0.909656	0.372202	0.939117	0.638478	0.279258	0.163329	0.0165379	0.887675	0.868452	0.520478	0.996674	0.990049	0.992295
FALSE	High	Master Protein	TGGT1_210840-t26_1-p1	transcript=TGGT1_210840-t26_1 | gene=TGGT1_210840 | organism=Toxoplasma_gondii_GT1 | gene_product=Arginyl-tRNA synthetase family protein [Source:UniProtKB/TrEMBL;Acc:S7UKP6] | transcript_product=arginyl-tRNA synthetase family protein | location=TGGT1_chrIV:1942834-1951568(-) | protein_length=595 | sequence_SO=chromosome | SO=protein_coding_gene | is_pseudo=false	MQALNVQVKEAFRRALAAAFPSVDHAPIITVSKFGDFQCNSAMALFKQKSKEELGVQSPKEAGEKIAAQLKDESLFSNVQASPQGFVTVDISGAWLCKDLKEILKQKGHLQVPHAEKKLRVMVDFSSPNVAKEMHVGHLRSTIIGESICRILAFHGHEVQRINHIGDWGTQFGMLIEYLHSQFPDYKANMPDISDLNAFYKKAKAAFDADEDFKTRSREMVVKLQGGDEAALESWRLICDVSRKEFEKVYKRLDVSLEERGESYYNAVLPKVVQELTDKGMVTVSDGAKCVFTKVSEVPLMAVKSDGGFGYDSTDLAAVRDRLVERRGDWLIYVTDLGQEEHFTKIFAAAEQAGWHLPPKTRLDHMGFGVVQGQDGKRFKTRSGEVVKLVDLLDEAKAR…	0	106.438	34	21	52	21	595	67	6.51	125.18	21	0.967	1.01	0.953	1.044	1.01	1.055	0.995	1.023	1.029	1.005	-0.05	0.01	-0.07	0.06	0.01	0.08	-0.01	0.03	0.04	0.01	0.267321	0.786368	0.183994	0.257356	0.221944	0.123937	0.398178	0.414906	0.378801	0.699515	0.996674	0.995152	0.971021
FALSE	High	Master Protein	TGGT1_319560-t26_1-p1	transcript=TGGT1_319560-t26_1 | gene=TGGT1_319560 | organism=Toxoplasma_gondii_GT1 | gene_product=EGF-like domain-containing protein [Source:UniProtKB/TrEMBL;Acc:S7VSV0] | transcript_product=microneme protein MIC3 | location=TGGT1_chrIV:856315-857588(+) | protein_length=383 | sequence_SO=chromosome | SO=protein_coding_gene | is_pseudo=false	MRGGTSALLHALTFSGAVWMCTPAEALPIQKSVQLGSFDKVVPSREVVSESLAPSFAVTETHSSVQSPSKQETQLCAISSEGKPCRNRQLHTDNGYFIGASCPKSACCSKTMCGPGGCGEFCSSNWIFCSSSLIYHPDKSYGGDCSCEKQGHRCDKNAECVENLDAGGGVHCKCKDGFVGTGLTCSEDPCSKRGNAKCGPNGTCIVVDSVSYTCTCGDGETLVNLPEGGQGCKRTGCHAFRENCSPGRCIDDASHENGYTCECPTGYSREVTSKAEESCVEGVEVTLAEKCEKEFGISASSCKCDNGYSGSASATSHHGKGESGSEGSLSEKMNIVFKCPSGYHPRYHAHTVTCEKIKHFALDGAGNHDTTTYVARRRYPASL	0	106.427	46	15	114	15	383	40.5	6.64	357.16	15	1.026	1.027	1.019	1.043	1.07	1.071	1.063	1.068	1.046	1.061	0.04	0.04	0.03	0.06	0.1	0.1	0.09	0.09	0.06	0.09	0.770986	0.773494	0.690106	0.751563	0.297519	0.267413	0.523654	0.492225	0.282327	0.369299	0.996674	0.995152	0.980327
FALSE	High	Master Protein	TGGT1_207640-t26_1-p1	transcript=TGGT1_207640-t26_1 | gene=TGGT1_207640 | organism=Toxoplasma_gondii_GT1 | gene_product=Isoleucyl-tRNA synthetase family protein [Source:UniProtKB/TrEMBL;Acc:S7UJP0] | transcript_product=isoleucyl-tRNA synthetase family protein | location=TGGT1_chrIb:186451-201730(-) | protein_length=1242 | sequence_SO=chromosome | SO=protein_coding_gene | is_pseudo=false	MVLLLPRTSFRNPATAAICLIPEFRFRSSQAHQLKFFRIPGDQRTSLPSSQGLVSSSQWVLPRYSALSSASLAVISASKSAAPRLLKYRPSARFSSRLSVVSRGLSFLRTPNGSASSPLPSSVNSGPTVENFRTKSDATMASPCATTFEPLPERPDFPKEEERILAEWKDRNTFKRSVELSKGKPIFTFYDGPPFATGLPHYGHILAGTIKDVVTRYAHQTGHYVDRRFGWDCHGLPVEFEIDKSLGITSRHEIVEMGIDKYNDKCRSIVMRYASEWRSVIERMGRWIDFDNDYKTLDTRFMESVWWVFKQLFDKGLVYRANKIMPFSTACSTPLSNFEANQNYKDVKDPSIVIAFSCVEENGGVPLEFLAWTTTPWTLPSNLALCVNPELTYIQIRNK…	0	105.916	21	27	54	27	1242	141.3	7.5	145.52	27	0.984	0.99	0.987	1.017	1	1.007	1.003	1.013	1.013	1.016	-0.02	-0.01	-0.02	0.02	0	0.01	0	0.02	0.02	0.02	0.431523	0.794479	0.65567	0.638342	0.999388	0.262689	0.537209	0.768161	0.759301	0.497354	0.996674	0.995152	0.975698
FALSE	High	Master Protein	Q07065	Cytoskeleton-associated protein 4 OS=Homo sapiens (Human) OX=9606 GN=CKAP4 PE=1 SV=2	MPSAKQRGSKGGHGAASPSEKGAHPSGGADDVAKKPPPAPQQPPPPPAPHPQQHPQQHPQNQAHGKGGHRGGGGGGGKSSSSSSASAAAAAAAASSSASCSRRLGRALNFLFYLALVAAAAFSGWCVHHVLEEVQQVRRSHQDFSRQREELGQGLQGVEQKVQSLQATFGTFESILRSSQHKQDLTEKAVKQGESEVSRISEVLQKLQNEILKDLSDGIHVVKDARERDFTSLENTVEERLTELTKSINDNIAIFTEVQKRSQKEINDMKAKVASLEESEGNKQDLKALKEAVKEIQTSAKSREWDMEALRSTLQTMESDIYTEVRELVSLKQEQQAFKEAADTERLALQALTEKLLRSEESVSRLPEEIRRLEEELRQLKSDSHGPKEDGGFRHSEAF…	0	105.661	38	24	52	24	602	66	5.92	135.86	24	1.025	1.027	1.032	0.969	0.993	0.995	1	1.044	1.047	1.05	0.04	0.04	0.05	-0.05	-0.01	-0.01	0	0.06	0.07	0.07	0.523575	0.600384	0.466827	0.0621914	0.799636	0.895904	0.999185	0.55633	0.485414	0.568979	0.996674	0.990049	0.973444
FALSE	High	Master Protein	TGGT1_270690-t26_1-p1	transcript=TGGT1_270690-t26_1 | gene=TGGT1_270690 | organism=Toxoplasma_gondii_GT1 | gene_product=Arginyl-tRNA synthetase [Source:UniProtKB/TrEMBL;Acc:A0A125YS10] | transcript_product=arginyl-tRNA synthetase | location=TGGT1_chrVIII:5067864-5080628(-) | protein_length=1174 | sequence_SO=chromosome | SO=protein_coding_gene | is_pseudo=false	MSNALPRPAHASSDAMGLGPSPSRASQHSSFSSTLPSSSREREAGWNEADDEGPEAEHQPRLLETLQDVPKPFLDKARGIVEQLRGREGEKATLDANSAYLLCFQLLKLAGLEAEIPRLVVFGQQSMGKTTLLDYIMGGPIGYSSTDTGTRQPVVILLRPSESADSVQCWLGGEEIEVKELQARMKEIMSSQGERISSQELEVELAVPNGVHAVFVDLPGVKDDSKAGATQTRSVVRTYVQNNPNDLYILVKKASDDPANWPWSLREFILSAPPKGLGLTPRQTVVVGTRAKEFLVNEKNDIRTQSQLLERVLKRAVKDSSGAPLPLFLLELFSLSIEEKDALDFAAKRAAMNRQMDEGGRTVRQLLETAFEPGPNPQLSRKLTEFFSPSRFKKELNHK…	0	105.32	30	32	42	32	1174	130.2	6.58	81.52	32	1.058	1.005	1.043	0.954	1.009	0.959	0.995	0.978	1.004	0.984	0.08	0.01	0.06	-0.07	0.01	-0.06	-0.01	-0.03	0.01	-0.02	0.322375	0.664329	0.0185161	0.131879	0.739973	0.0180648	0.709049	0.290478	0.536834	0.59649	0.996674	0.990049	0.971021
FALSE	High	Master Protein	TGGT1_289830-t26_1-p1	transcript=TGGT1_289830-t26_1 | gene=TGGT1_289830 | organism=Toxoplasma_gondii_GT1 | gene_product=Eukaryotic translation initiation factor 3 subunit I [Source:UniProtKB/TrEMBL;Acc:A0A125YIM0] | transcript_product=putative eukaryotic initiation factor-3, delta subunit | location=TGGT1_chrIX:3281722-3286956(+) | protein_length=335 | sequence_SO=chromosome | SO=protein_coding_gene | is_pseudo=false	MRPLFLMGHARPLTWVTFNRDGDLLFTCGKDARLAVWFSENGERIGTYDCGKGVVWNCDCTLDSKRLICASADQKVMIFDVCTGAIIHEIPEGGPCKFVEWNRKPGEQNKFVVVHDAFGSQSTKAIKVWELDGPNGKPRRLWSQDDYASRCVQVRWGPYDQTIISCHENGDIMIWNAETGEYINEFRGHKQFITCLSFSDDRLLMLSSCSDGSAKLWDTIDFKCLKTYQTDRPLNACGISPRFNKAGEERKCHVMLGGGQAAEDVTTTASGEGKFEALIYHMVYQEELGSCKGHFGPLNTLCWMPDGNGYASGGEDGYVRIYHFDEPYFTDKFEP	0	105.29	56	14	38	14	335	37.7	5.69	115.32	14	0.998	1.04	1.037	0.97	0.968	1.008	1.006	1.016	1.026	1.037	0	0.06	0.05	-0.04	-0.05	0.01	0.01	0.02	0.04	0.05	0.938561	0.0417469	0.171545	0.0345482	0.390548	0.302776	0.711119	0.426499	0.272062	0.296847	0.998216	0.989773	0.971021
FALSE	High	Master Protein	TGGT1_305860-t26_1-p1	transcript=TGGT1_305860-t26_1 | gene=TGGT1_305860 | organism=Toxoplasma_gondii_GT1 | gene_product=Calcium-dependent protein kinase CDPK3 [Source:UniProtKB/TrEMBL;Acc:A0A125YQG3] | transcript_product=calcium-dependent protein kinase CDPK3 | location=TGGT1_chrIX:5409701-5417293(+) | protein_length=537 | sequence_SO=chromosome | SO=protein_coding_gene | is_pseudo=false	MGCVHSKNPHSKHAGAAGEKPDASLEKGGQSKGSAPSSGTGDSGKGTGSPDTKRDSMPMTPGMYITQQKAHLSDRYQRVKKLGSGAYGEVLLCKDKLTGAERAIKIIKKSSVTTTSNSGALLDEVAVLKQLDHPNIMKLYEFFEDKRNYYLVMEVYRGGELFDEIILRQKFSEVDAAVIMKQVLSGTTYLHKHNIVHRDLKPENLLLESKSRDALIKIVDFGLSAHFEVGGKMKERLGTAYYIAPEVLRKKYDEKCDVWSCGVILYILLCGYPPFGGQTDQEILKRVEKGKFSFDPPDWTQVSDEAKQLVKLMLTYEPSKRISAEEALNHPWIVKFCSQKHTDVGKHALTGALGNMKKFQSSQKLAQAAMLFMGSKLTTLEETKELTQIFRQLDNNGDG…	0	105.206	41	19	38	16	537	60.4	6.4	108.68	19	1.007	1.002	1.009	1.021	1.027	1.022	1.03	1.069	1.047	1.049	0.01	0	0.01	0.03	0.04	0.03	0.04	0.1	0.07	0.07	0.821003	0.969649	0.0571177	0.522879	0.0308312	0.397821	0.421141	0.411857	0.33529	0.111524	0.996674	0.998909	0.971021
FALSE	High	Master Protein	TGGT1_321650-t26_1-p1	transcript=TGGT1_321650-t26_1 | gene=TGGT1_321650 | organism=Toxoplasma_gondii_GT1 | gene_product=Protein kinase domain-containing protein [Source:UniProtKB/TrEMBL;Acc:S7VRX1] | transcript_product=hypothetical protein | location=TGGT1_chrIb:1657484-1670398(+) | protein_length=1375 | sequence_SO=chromosome | SO=protein_coding_gene | is_pseudo=false	MLPRMQSERSVARQSLGATRSRCLLRFATKKWASRGLGSSNRPGRPPPSSAAGHRASCPFFPRSSFSASFALRFLCPVLCSLLLATLFFVSPREVDALKFRGNGGRHLNAELDGNWAKRFQETQRAAPPDSFFVSDSEISGRTSLLSLASSEQGTSTVDSRFVGLSGQKPRHIWGSQEETGERREDRQEESEGRRGNEDAYHPHTFSHSSSSMPFYGALFDSSSAFPPFSAAVSSPPFSMTVSPADRVIQALPIAFAEHKSGGEKASREETGGKKDDQALSFLGDTKSASELNPPRLVCPDKPPTLPPREEQVRKAYALPLCELPWDDLGPMLGSGTFGRVYPLRRPACTEVTKGFVGRKFAVKIFWLKRKGMMNLFDTISQGGTPSAEQTDPGTIAAI…	0	104.883	17	22	46	22	1375	153.4	8.66	107.78	22	1.002	1.011	1.033	0.996	0.998	1.007	1.029	1.004	1.035	1.016	0	0.02	0.05	-0.01	0	0.01	0.04	0.01	0.05	0.02	0.865952	0.235396	0.458499	0.184851	0.893972	0.26527	0.487371	0.925289	0.166575	0.261068	0.996674	0.989773	0.973444
FALSE	High	Master Protein	TGGT1_258090-t26_1-p1	transcript=TGGT1_258090-t26_1 | gene=TGGT1_258090 | organism=Toxoplasma_gondii_GT1 | gene_product=hypothetical protein | transcript_product=hypothetical protein | location=TGGT1_chrVIIb:3544361-3553453(-) | protein_length=954 | sequence_SO=chromosome | SO=protein_coding_gene | is_pseudo=false	MATKQMLPGEGADRSSRPGTRSVARSRGTSPSSAPRLGISQELTALGSQLQALDRRQQLLFDPSVFPEDSRLAVSFPPFTRKVEDAAEAPHGAVKLRNPHRDGLDRVLGDLSKPVDLGVSLPAELQRDSFAQNDPPGRLPPALKHTSLRKLDEDAVSKFHVGVRQSARPVSYADALERTRREEDRQEKGAVRFAAATAAVAAAASAVGADADEIDCVVTVEEQAPPVCVSQGETNGGKSSGPGPGELRAEQAAAGSTVKMPADVYSAPGGAWRAAARAPSPEALAEPKVYSHSQWVDERRGEGGAPPGQFPFPRGLTEMQERMEEEWIDRERRLRADHKREMERAVAHASEKLSREYSRRLVFELQEQEKALLAQMHERHRQALAEIRCISESKTDAEE…	0	104.761	29	26	40	25	954	106	7.49	93.6	26	1.055	1.031	1.034	0.954	1.007	0.983	0.987	1.008	0.975	0.995	0.08	0.04	0.05	-0.07	0.01	-0.02	-0.02	0.01	-0.04	-0.01	0.525892	0.308024	0.688757	0.0754047	0.920138	0.340925	0.856424	0.863382	0.559588	0.674266	0.996674	0.989773	0.980327
FALSE	High	Master Protein	TGGT1_231440-t26_1-p1	transcript=TGGT1_231440-t26_1 | gene=TGGT1_231440 | organism=Toxoplasma_gondii_GT1 | gene_product=LsmAD domain-containing protein [Source:UniProtKB/TrEMBL;Acc:S7WJ46] | transcript_product=LsmAD domain-containing protein | location=TGGT1_chrVIII:1418874-1426956(-) | protein_length=1524 | sequence_SO=chromosome | SO=protein_coding_gene | is_pseudo=false	MGKTDAQSPSSGPAGRPESGRKSVTPAEVNELRLNYCMAVLAGREVRVNLENGGRVQGLFHAYEKKDRKDGQEGSLVLSCARDLPSKTRVSGEIKRQMHLPDRCFVSFHATDVPLAPSGPAGPASGSSSGLQGAAVHAGSGFQTDTQISAHSGKRFNDRSTRGGAGQPRELQKWVGDGSRGEDTFGALEPAGGAGARRVNGGTASDWDQFAVNEQRFGVRSSYKEELYTTKLDLDAIPLQVQQQADRIATELEKQQQGTRDGAVDDSRGVEDEEALFSAVTGTGGYSQHRRAPPDGPGPGVPSSSRSSSSCGADSGVGGGARGSSRNTASSGSFPHVMASGAHANKSGAAGGGLSATGERGGDRGAASSAAVSASGSANRSGGVGAQGKGVAGAHASGS…	0	104.629	17	23	39	23	1524	148	9.44	98.59	23	0.995	0.982	0.989	1.005	1	0.987	0.994	1.003	1.008	1.021	-0.01	-0.03	-0.02	0.01	0	-0.02	-0.01	0.01	0.01	0.03	0.836762	0.717719	0.861858	0.915616	0.997121	0.103253	0.724383	0.913796	0.560114	0.333585	0.996674	0.995152	0.987792
FALSE	High	Master Protein	TGGT1_309752-t26_1-p1	transcript=TGGT1_309752-t26_1 | gene=TGGT1_309752 | organism=Toxoplasma_gondii_GT1 | gene_product=Succinate--CoA ligase [ADP-forming] subunit beta, mitochondrial [Source:UniProtKB/TrEMBL;Acc:A0A125YHZ3] | transcript_product=putative succinate-Coenzyme A ligase, beta subunit | location=TGGT1_chrXI:749202-752425(+) | protein_length=498 | sequence_SO=chromosome | SO=protein_coding_gene | is_pseudo=f…	MALSAAGVGRQVLSAAARLSCSTSSAPLRATISSVTAASATSSSLLPSLLCATHRATGATSPSHQREQRRFLNLHEYQSMRIMKEFHITTPKFAVASTAKEAEQEAATFLSESPSGDGEPVDFVVKAQVLAGGRGLGFFRENGYQGGVQVCESPREVGIVAEKMLGKTLVTKQTGKEGKLCNKVLVTERFFIRKEKYVAILMDRGAGGPILIGSARGGTSIEDIAHNYPESIHKMPIDINQGISEPRLREFAELLGFSGDRLEAACQCIRGLYELFRSKDCTQIEVNPLVETHDGRVLVCDAKLNFDDNAGFRQKDIFSQRDYSQEDPREVAADAADLNYIGLEGSIGCMVNGAGLAMATMDIIHLHGGSPANFLDVGGGADQHQIIEALKIIQQDKRA…	0	104.434	48	21	51	20	498	53.4	6.48	136.32	21	0.994	0.981	1.009	1.008	1.003	0.989	1.017	1.027	1.013	0.998	-0.01	-0.03	0.01	0.01	0	-0.02	0.02	0.04	0.02	0	0.366589	0.56715	0.637415	0.624259	0.895388	0.513458	0.631097	0.53482	0.687377	0.932303	0.996674	0.990049	0.975418
FALSE	High	Master Protein	P08670	Vimentin OS=Homo sapiens (Human) OX=9606 GN=VIM PE=1 SV=4	MSTRSVSSSSYRRMFGGPGTASRPSSSRSYVTTSTRTYSLGSALRPSTSRSLYASSPGGVYATRSSAVRLRSSVPGVRLLQDSVDFSLADAINTEFKNTRTNEKVELQELNDRFANYIDKVRFLEQQNKILLAELEQLKGQGKSRLGDLYEEEMRELRRQVDQLTNDKARVEVERDNLAEDIMRLREKLQEEMLQREEAENTLQSFRQDVDNASLARLDLERKVESLQEEIAFLKKLHEEEIQELQAQIQEQHVQIDVDVSKPDLTAALRDVRQQYESVAAKNLQEAEEWYKSKFADLSEAANRNNDALRQAKQESTEYRRQVQSLTCEVDALKGTNESLERQMREMEENFAVEAANYQDTIGRLQDEIQNMKEEMARHLREYQDLLNVKMALDIEIAT…	0	104.376	49	24	61	22	466	53.6	5.12	116.92	24	1.017	0.978	0.962	1.056	1.074	1.033	1.016	1.06	1.069	1.061	0.02	-0.03	-0.06	0.08	0.1	0.05	0.02	0.08	0.1	0.09	0.37404	0.787795	0.617601	0.620873	0.48876	0.304096	0.628848	0.664487	0.607471	0.471448	0.996674	0.995152	0.975418
FALSE	High	Master Protein	TGGT1_204400-t26_1-p1	transcript=TGGT1_204400-t26_1 | gene=TGGT1_204400 | organism=Toxoplasma_gondii_GT1 | gene_product=ATP synthase subunit alpha [Source:UniProtKB/TrEMBL;Acc:S7UU80] | transcript_product=putative ATPase synthase subunit alpha | location=TGGT1_chrVIIa:1716199-1723634(+) | protein_length=577 | sequence_SO=chromosome | SO=protein_coding_gene | is_pseudo=false	MTIHSCLARRAVSVAASGARAFASGLGARAVAVGALQSARLLHTSSLRAAGAKISPSEMSRLLEERIAGWKTQTSTEEVGRVVSVGDGIARLFGLEGVQAGELVEFQNGMTGMALNLETDNVGVVIFGDDRSVLEGDSVKRTGRIVDVPIGPGLLGRVVDALGNPIDGKGPIPAKERRRVELKAPGIIPRKSVHEPMMTGLKCVDALVPVGRGQRELIIGDRQTGKTAVAVDAIINQKEINDSTDDESKKLYCIYVAVGQKRSTVAQIVKALEQRDAMKYTTVVAATASEAAPLQFLAPYSGCAMGEWFRDSGRHCVIIYDDLSKQATAYRQMSLLLRRPPGREAYPGDVFYLHSRLLERAAKMGDKSGGGSLTALPVIETQAGDVSAYIPTNVISITD…	0	104.199	36	21	64	16	577	62.1	8.37	138.07	21	0.952	0.948	0.941	1.059	1.008	1.004	0.997	1.052	1.062	1.058	-0.07	-0.08	-0.09	0.08	0.01	0.01	-0.01	0.07	0.09	0.08	0.454636	0.573864	0.357524	0.436273	0.296467	0.894798	0.752087	0.435604	0.290398	0.307826	0.996674	0.990049	0.971021
FALSE	High	Master Protein	TGGT1_214080-t26_1-p1	transcript=TGGT1_214080-t26_1 | gene=TGGT1_214080 | organism=Toxoplasma_gondii_GT1 | gene_product=Toxofilin [Source:UniProtKB/TrEMBL;Acc:A0A125YQJ5] | transcript_product=toxofilin | location=TGGT1_chrX:5904318-5905055(+) | protein_length=245 | sequence_SO=chromosome | SO=protein_coding_gene | is_pseudo=false	MAQYKSRPLAAFLLLITVGSLLTASESVQLSEGMKRLSMRGRSPSPKRGRFESGDEGTSTMSPSVAARQQELGLLRPEERLIAGQAKAAALQTVHQLGAVALTPEQAKAALLDEILRATQNLDLRKYENLNTEQQKAYEQVQRDLSQLSPETKALLIENQRKEKTLLEKARKLFQRRHYHVTKQAALAGQILNEQRDASGALQSGAVKTAIQRANEQYNVAEEDKNFNEEQHASQLKKVGAMPSS	0	103.817	71	18	79	17	245	27.1	9.57	222.05	18	0.99	1.02	0.987	1.001	0.991	1.021	0.988	1.011	1.02	1.006	-0.01	0.03	-0.02	0	-0.01	0.03	-0.02	0.02	0.03	0.01	0.731268	0.500051	0.692293	0.436226	0.753019	0.498131	0.711882	0.550856	0.305159	0.587952	0.996674	0.990049	0.980327
FALSE	High	Master Protein	TGGT1_249180-t26_1-p1	transcript=TGGT1_249180-t26_1 | gene=TGGT1_249180 | organism=Toxoplasma_gondii_GT1 | gene_product=Bifunctional dihydrofolate reductase-thymidylate synthase [Source:UniProtKB/TrEMBL;Acc:A0A125YXY2] | transcript_product=bifunctional dihydrofolate reductase-thymidylate synthase | location=TGGT1_chrXII:4294324-4300363(-) | protein_length=610 | sequence_SO=chromosome | SO=protein_coding_gene | is_pseu…	MQKPVCLVVAMTPKRGIGINNGLPWPHLTTDFKHFSRVTKTTPEEASRLNGWLPRKFAKTGDSGLPSPSVGKRFNAVVMGRKTWESMPRKFRPLVDRLNIVVSSSLKEEDIAAEKPQAEGQQRVRVCASLPAALSLLEEEYKDSVDQIFVVGGAGLYEAALSLGVASHLYITRVAREFPCDVFFPAFPGDDILSNKSTAAQAAAPAESVFVPFCPELGREKDNEATYRPIFISKTFSDNGVPYDFVVLEKRRKTDDAATAEPSNAMSSLTSTRETTPVHGLQAPSSAAAIAPVLAWMDEEDRKKREQKELIRAVPHVHFRGHEEFQYLDLIADIINNGRTMDDRTGVGVISKFGCTMRYSLDQAFPLLTTKRVFWKGVLEELLWFIRGDTNANHLSEKG…	0	103.661	30	16	37	16	610	68.7	7.24	113.51	16	1.013	0.994	1.006	1.023	1.036	1.017	1.028	1.038	1.062	1.045	0.02	-0.01	0.01	0.03	0.05	0.02	0.04	0.05	0.09	0.06	0.719904	0.287652	0.302355	0.0744829	0.452354	0.00585806	0.12363	0.26636	0.183898	0.407529	0.996674	0.989773	0.971021
FALSE	High	Master Protein	TGGT1_291960-t26_1-p1	transcript=TGGT1_291960-t26_1 | gene=TGGT1_291960 | organism=Toxoplasma_gondii_GT1 | gene_product=Kinase-like domain-containing protein [Source:UniProtKB/TrEMBL;Acc:S7UNX9] | transcript_product=rhoptry kinase family protein ROP40 (incomplete catalytic triad) | location=TGGT1_chrIX:4241532-4244563(+) | protein_length=525 | sequence_SO=chromosome | SO=protein_coding_gene | is_pseudo=false	MTPSTCCFGVLFQSFRGNSASASEESCLGGGHPDGTTATVFRPKTLQALGLATDSDSEPEGKGGYQRLTESTRRKKKATGRIASLFGRGRGKGDEEASGDEGASGGKEQPLGPPSGIPRRRRFWQKERVEPEDAVVRAFRRFLKYRVLDVETIEGTPSQLDRSSWTPSPPFFQPGEGSSKAVEYFVKQQTPALTDEMHKLMEVVDPVMPPGRPLQMSSPSSKRTTHFERGPMLMTDFFALTVDHQPFNMRIFPLPGGFEGEQKVEQYKKVMLNEQKVLSIFGVADGKKVSNAYHCYLPVEEVFFGKGQQVISLGPSLKMPSVVFLYPSASATLGQVAEAIKLAAQQQGTALVAQAAQLHITLQLIKLVAITTSKGILLRRLSLENFLLRGDGVVFLSGF…	0	103.574	42	19	59	19	525	57.9	7.43	146.57	19	0.983	1.01	1.006	0.988	0.97	0.997	0.993	1.003	1.008	1.002	-0.03	0.01	0.01	-0.02	-0.04	0	-0.01	0	0.01	0	0.0395523	0.648856	0.848432	0.783055	0.54022	0.912922	0.657598	0.939497	0.860726	0.960766	0.996674	0.990049	0.984106
FALSE	High	Master Protein	TGGT1_293440-t26_1-p1	transcript=TGGT1_293440-t26_1 | gene=TGGT1_293440 | organism=Toxoplasma_gondii_GT1 | gene_product=hypothetical protein | transcript_product=hypothetical protein | location=TGGT1_chrIa:306622-308238(-) | protein_length=538 | sequence_SO=chromosome | SO=protein_coding_gene | is_pseudo=false	MAANPSTVEEAAITDKSPLVAKEETKQKPESSPAHESDPLIKQKEEVAPMVKQSEESQPMVKQNEESQPMVKQSDESQPMVKQSEESEPAVSQNGGPEPMTQKNEESEPVVKQNEEPEPAVGQNGESEQLGKDIEKAESMVKEKEESEPMVKENEEPQPTAAADKPAVNAQLLVDRGIAEERARQAMKDARSRIKKLSLMVSTVMIQFIFLGVVVFFCFAPMFSCLSMTFIGLGLISGTFGLLCVCCKSRIGTIFYLLLGIVCLLFLLVCWAFYAYMLYKATLTAIAAGQDKVNAWVEDTTGGLIPQGNGGIFDIGKHLDNLPLPGDIESLKDQLGKFTKSEENSGSLIGAKSKENGGSLIGGMATAALLKECKKGIEEEGSDYMDDVQSVFFALASYG…	0	103.454	40	16	42	16	538	58.7	5.21	115.31	16	0.989	0.989	1.035	1.035	1.023	1.023	1.07	1.032	1.03	1.045	-0.02	-0.02	0.05	0.05	0.03	0.03	0.1	0.04	0.04	0.06	0.790693	0.795263	0.655815	0.0644378	0.644687	0.658764	0.461463	0.488268	0.505801	0.230223	0.996674	0.995152	0.975698
FALSE	High	Master Protein	TGGT1_238040A-t26_1-p1	transcript=TGGT1_238040A-t26_1 | gene=TGGT1_238040A | organism=Toxoplasma_gondii_GT1 | gene_product=Protein disulfide-isomerase domain-containing protein [Source:UniProtKB/TrEMBL;Acc:S7W691] | transcript_product=protein disulfide-isomerase domain-containing protein | location=TGGT1_chrVI:19741-27980(-) | protein_length=1139 | sequence_SO=chromosome | SO=protein_coding_gene | is_pseudo=false	MGSRMKASGGPPGSKGGPLVRRHSGVLGYFSRASVLFKRLRRYVTVRSLSVAVLVFGVCYYVVQQRLLSVSRLSFGAEGPGLAPAFNIPSRFFSLSLQSDKGTVTEDEKQALSGNEFSVSWSTSPRLSGGAKVTTQVVNKQDGTFLLRYTLHDDIPAGYSLTGKLLYAGKKPEKSIVEPFVFKLDGPVHPATCQCPQPAHEWKQALACSHTLPRQLQRDLSRFPIIDLDRLRKDGPAFAAPNTLRTVIHYVIKNNQIFRRHFGPLPGFQYFMDNVLLYLAAAVKLPDVEFLMNLGDWPLEKRGADEGALPLFSWSGSDDTLDIILPQWDVVKTSTAFGKSDPDLLTVQAGSLVPLAKRIPKALFRGRDSNPVRVKLAELARAHSDLLDVAITSWENDTH…	0	103.398	25	27	40	23	1139	126.1	8.68	100.73	27	0.996	0.971	0.981	1.022	1.018	0.993	1.003	1	1.017	1.031	-0.01	-0.04	-0.03	0.03	0.03	-0.01	0	0	0.02	0.04	0.892948	0.543669	0.599776	0.660286	0.815426	0.297863	0.819581	0.959022	0.019742	0.319677	0.996674	0.990049	0.975418
FALSE	High	Master Protein	TGGT1_262920-t26_1-p1	transcript=TGGT1_262920-t26_1 | gene=TGGT1_262920 | organism=Toxoplasma_gondii_GT1 | gene_product=PDZ_3 domain-containing protein [Source:UniProtKB/TrEMBL;Acc:S7UXW4] | transcript_product=trypsin domain-containing protein | location=TGGT1_chrVIIb:896939-905694(+) | protein_length=972 | sequence_SO=chromosome | SO=protein_coding_gene | is_pseudo=false	MAAFHRSRRPRARTGVMLLLLSLFVALEASSWISSDSVVCLKAHGAEASSLLTPEPSRDLREDAAVLHEDGFVSTFPAAVATLAHGAEPLPPEREITEEVTGEMLVGSSLLQVSAAGQPTELAAAAAEGVNSQGGNTLAKTLAAAAASQKQTTAKDRHALLTSSLSSVVKIFVDITMPDYFSPWQMQAPKDASGSGFVVEGKRILTNGHVVGETTRVLVRKHGNAKKFLARVVATAHEADLALLEVESDEFWENLQPLPFGGIPRLRDSVTVLGYPTGGDQLSITEGIVSRVGMSMYAHSSVSLLTVQIDAAINPGNSGGPALVDGRVVGVAFQGFSHLQNVGYIVPYPIIEHFLNDLVLHGRYTGFPSLGVKVSHMENDHLRQFKGLSALKASDLPPG…	0	103.078	29	21	35	21	972	104.4	6.52	97.7	21	0.995	0.956	0.963	1.034	1.029	0.988	0.996	1.009	1.028	1.02	-0.01	-0.06	-0.05	0.05	0.04	-0.02	-0.01	0.01	0.04	0.03	0.806205	0.0291254	0.304228	0.048468	0.343512	0.0243149	0.873989	0.752951	0.253334	0.435492	0.996674	0.989773	0.971021
FALSE	High	Master Protein	Q09666	Neuroblast differentiation-associated protein AHNAK OS=Homo sapiens (Human) OX=9606 GN=AHNAK PE=1 SV=2	MEKEETTRELLLPNWQGSGSHGLTIAQRDDGVFVQEVTQNSPAARTGVVKEGDQIVGATIYFDNLQSGEVTQLLNTMGHHTVGLKLHRKGDRSPEPGQTWTREVFSSCSSEVVLSGDDEEYQRIYTTKIKPRLKSEDGVEGDLGETQSRTITVTRRVTAYTVDVTGREGAKDIDISSPEFKIKIPRHELTEISNVDVETQSGKTVIRLPSGSGAASPTGSAVDIRAGAISASGPELQGAGHSKLQVTMPGIKVGGSGVNVNAKGLDLGGRGGVQVPAVDISSSLGGRAVEVQGPSLESGDHGKIKFPTMKVPKFGVSTGREGQTPKAGLRVSAPEVSVGHKGGKPGLTIQAPQLEVSVPSANIEGLEGKLKGPQITGPSLEGDLGLKGAKPQGHIGVDA…	0	103.042	15	30	39	30	5890	628.7	6.15	77.57	30	1.123	1.044	1.128	0.975	1.095	1.017	1.099	1.037	1.018	1.071	0.17	0.06	0.17	-0.04	0.13	0.02	0.14	0.05	0.03	0.1	0.310139	0.533165	0.287289	0.760873	0.0248141	0.509939	0.045496	0.136817	0.706999	0.542381	0.996674	0.990049	0.971021
FALSE	High	Master Protein	TGGT1_232710-t26_1-p1	transcript=TGGT1_232710-t26_1 | gene=TGGT1_232710 | organism=Toxoplasma_gondii_GT1 | gene_product=40S ribosomal protein S3a [Source:UniProtKB/TrEMBL;Acc:A0A125YZM8] | transcript_product=ribosomal protein RPS3A | location=TGGT1_chrVIII:2231374-2232762(+) | protein_length=259 | sequence_SO=chromosome | SO=protein_coding_gene | is_pseudo=false	MAIGKNKRMSKGKKGGKKKIGDPFLKKEWYDLKAPTLFNVRNFGKTLVTKSQGTKLAVDGLRGRVYEVNLADLNNDEDQGFRKIKLCCEDIQGRNCLTDFHGMDMTRDKICSLVRKCHSLIEAFVDVTTLDGYTLRMFCIAFTKRRPEQVKSTCYAQTSQIRAIRKKMMTIMSAEASKCQLRDLVKKFIPESIGKDIENACKGIFPLQNVFIRKVKMLKKPKFDLTKLMELHGEAEDVGRKVQAESGEAQNTLTAETKA	0	103.004	54	16	83	16	259	29.4	9.57	228.68	16	0.963	0.983	0.997	1.055	1.016	1.037	1.051	1.034	1.026	1.024	-0.05	-0.03	0	0.08	0.02	0.05	0.07	0.05	0.04	0.03	0.392002	0.256005	0.799047	0.430964	0.50967	0.495962	0.366277	0.577345	0.411537	0.505796	0.996674	0.989773	0.984106
FALSE	High	Master Protein	TGGT1_291930-t26_1-p1	transcript=TGGT1_291930-t26_1 | gene=TGGT1_291930 | organism=Toxoplasma_gondii_GT1 | gene_product=RNA recognition motif-containing protein [Source:UniProtKB/TrEMBL;Acc:S7W432] | transcript_product=RNA recognition motif-containing protein | location=TGGT1_chrIX:4212023-4217780(+) | protein_length=705 | sequence_SO=chromosome | SO=protein_coding_gene | is_pseudo=false	MKRKAAPVAVARPASDSDDSDSSEEEQQMKVQKGKKGAAGAPASAKGAPKKPVPSKADSSSSSEDDSSDEEVAKRVAKKGGVVTSASAVQSAKQAVAASKKGAKAKPAADSSDSSGDSTEDETPQSKPVAKGKAQTANAALRKQESSSDDSSDEESPNGVRQAAPKAAAKAAVRKAASSSDESSDEDEAPQPPQPKGKKAAQPSKAAAPKAASKKAAETSSEEDSSDDEPAKKVTPPASKKPAAKAASSDDDSSSDEEMPAPQARPQKPAAGKAAAQKKADSSESEEDSDSDDEPSAKSKVSAAARLPAKKPVAKKEESDSSDEDDSSDDEKPAPAAQKKAVAAAQPKKKAAKAPAASSDESDEDDSDEEEEAPKKSKNEKDVMMEEESDEDSDDEEKS…	0	102.986	28	19	48	19	705	73.1	5.43	127.25	19	0.98	0.964	0.953	1.031	1.01	0.994	0.982	0.996	0.981	1.04	-0.03	-0.05	-0.07	0.04	0.01	-0.01	-0.03	-0.01	-0.03	0.06	0.419537	0.185496	0.0775849	0.378292	0.834092	0.882025	0.43836	0.83699	0.559705	0.125962	0.996674	0.989773	0.971021
FALSE	High	Master Protein	TGGT1_227360-t26_1-p1	transcript=TGGT1_227360-t26_1 | gene=TGGT1_227360 | organism=Toxoplasma_gondii_GT1 | gene_product=Ribosomal protein RPL3 [Source:UniProtKB/TrEMBL;Acc:A0A125YQV1] | transcript_product=ribosomal protein RPL3 | location=TGGT1_chrX:901297-903989(-) | protein_length=389 | sequence_SO=chromosome | SO=protein_coding_gene | is_pseudo=false	MSHRKFERPRHGSLGFLPRKRCKRHRGKVKAFPKDDPSKPPHLTAFMGYKAGMTHVVRELDKPGSKLHKKEIVEAVTVVDTPPMVCVGVVGYIETPRGLRALVTVWAGHLSDECKRRFYKNWYKSKRKAFTKYAKRYGDNNKMEAELTRMKNYCSVIRAICHTQPSKTPIGSKKAHVMEIQVNGGSIAEKVDFCTKMFETAVPVKAVFTEGEMIDVIGVTKGHGVKGVVSRWGVTRLPRKTHRGLRKIACIGAWHPARVQFQVPRHGQKGYFHRTEMNKKVYRVGNGADPRNATTESDLTEKRITPMGGFPHYGTVNNDFLLLKGCIVGCKKRPITFRKTLVPRTTRRALEPVNLKFIDTSAKWGHGRFQTSEEKAKFYGPLKSRAAAM	0	102.888	40	17	54	16	389	44	10.3	147.01	17	1.009	0.975	1.009	1.004	1.013	0.979	1.013	0.994	0.984	0.985	0.01	-0.04	0.01	0.01	0.02	-0.03	0.02	-0.01	-0.02	-0.02	0.360858	0.331626	0.738527	0.693421	0.516102	0.189129	0.725334	0.659038	0.0411776	0.302087	0.996674	0.989773	0.980327
FALSE	High	Master Protein	TGGT1_209950-t26_1-p1	transcript=TGGT1_209950-t26_1 | gene=TGGT1_209950 | organism=Toxoplasma_gondii_GT1 | gene_product=Thioredoxin domain-containing protein [Source:UniProtKB/TrEMBL;Acc:A0A125YJX1] | transcript_product=putative thioredoxin | location=TGGT1_chrIb:1585569-1589285(-) | protein_length=424 | sequence_SO=chromosome | SO=protein_coding_gene | is_pseudo=false	MAPLRVCAFLPLVCFAFLSLAAGAKIRIDPMTHDVALVTQQNWDGKVQKFRAHQVFAVLFYKDGCSECQSLLDGEFNTLAKKMKGMVGVLAVDCGESAKLCTDQNVSSYPTILIFPPLPLPPYKFEGTPTYASLSKAVGPLIPSSVIIPTDMKDFEKAMATHVQVPKVLVFSDKPKASVLLKALSTAFKDKLHLVMINAEKLPEVVKKYRVTKFPHIVVTRKDKKDEAYKGEFNFQVLFDWLNVFSETFVLGGGFSDHTPKAEPSPETQPWKFQVIPELTKRSNVDLCFKKSLKALCVIYLKQGRELTAEETDMLEALKYQYDSGKGPDFRFMFMDVDTETGFRDLFAMESYPSVVVFNPHLKTRFTKLDADEHLSKESIASLLDKISSGNARFKVVPS…	0	102.561	45	17	64	17	424	47.7	8.34	140.67	17	0.99	1.011	0.983	1.004	0.994	1.015	0.986	0.993	1.002	0.998	-0.01	0.02	-0.03	0.01	-0.01	0.02	-0.02	-0.01	0	0	0.0327929	0.679336	0.213858	0.885885	0.816336	0.781853	0.532105	0.834791	0.943395	0.950772	0.996674	0.99327	0.971021
FALSE	High	Master Protein	TGGT1_214490-t26_1-p1	transcript=TGGT1_214490-t26_1 | gene=TGGT1_214490 | organism=Toxoplasma_gondii_GT1 | gene_product=Peptidase M16 inactive domain-containing protein [Source:UniProtKB/TrEMBL;Acc:S7W5N7] | transcript_product=peptidase M16 inactive domain-containing protein | location=TGGT1_chrX:6200575-6209880(-) | protein_length=1353 | sequence_SO=chromosome | SO=protein_coding_gene | is_pseudo=false	MALSPQESPASSEVVDLSAVVSPAAVSGAGEDAALRPATPSVCTPCCVCRGSAKAEGEGGNSAEALGFQLVQHFSLKTICIREWKCMQTGVRVLLCRIASPLCNLYATLPTEAHTDEGLPHTLEHLVFLGSRRFPYKGVLDFLANRCLSQGTNAWTATDHTTYTLTTAGSEGLLNLLPVYLDHLMIPTLHDNAFKTEVHHLTQNAGSAGVVYSEMEARERQASSVLYRKLVELVYPGDSGYRYETGGLMEQIRRTSNARVREYHKNFYKWSNLSLIVTGLVEATSLLDTVRRSIKQIEEAKTLPAPPALSACPELDAQIAKAVGPPEHGERPLAFSGERPWTDDRNVRLPASPSSPQSSSPAFHRVYFPADDAESGRVALAWRGPAWKDALGREVVDIL…	0	102.244	24	30	60	30	1353	148.8	5.33	131.8	30	1.006	0.992	0.974	1.026	1.032	1.018	0.999	1.008	1.02	1.028	0.01	-0.01	-0.04	0.04	0.05	0.03	0	0.01	0.03	0.04	0.895668	0.877506	0.37725	0.483466	0.246362	0.435597	0.905421	0.592376	0.221879	0.377998	0.996674	0.998909	0.971021
FALSE	High	Master Protein	TGGT1_258970-t26_1-p1	transcript=TGGT1_258970-t26_1 | gene=TGGT1_258970 | organism=Toxoplasma_gondii_GT1 | gene_product=hypothetical protein | transcript_product=hypothetical protein | location=TGGT1_chrVIIb:3019435-3037803(-) | protein_length=3039 | sequence_SO=chromosome | SO=protein_coding_gene | is_pseudo=false	MDSTTLHHPVPSSVGVDSQAVFPVSSSAYSQPASLPQGAASRPNPIAHAAASSPAASQYAAFSDAAACASELVRQVALADETDGSLENKLRGVGAWAGGCTYTQATDLRSYEENRHAFSLGQVYPEVVPLPPVLQRLLRRPKAVISETFPQQTWEETGAATGGFASAGSSAGSSAVSSAVSSAVSPASPFSPSFALAPRGILPRLQLLWVAEGATLHLWPLPGDSGSASSLFSEAACDGDDLGLVTSAPQKRLHARRLMDQQRLLHSTLSFELPASISCLEHVLLPRSLLPPAFAASFLFFSASRIWKTRVTAERRISGTSEREGTRSEADFCSDPSAPPDLVEATHFHALVAVSASSVSILALGSPPTGDAGENAFWPTPLPSSVPSSLQLYEVASLR…	0	102.186	11	29	36	29	3039	326.8	6.84	82.69	29	1.057	1.043	1.03	0.976	1.032	1.019	1.006	1.009	0.991	0.987	0.08	0.06	0.04	-0.03	0.04	0.03	0.01	0.01	-0.01	-0.02	0.477899	0.212782	0.121735	0.701988	0.0819174	0.669589	0.907685	0.851996	0.890216	0.837917	0.996674	0.989773	0.971021
FALSE	High	Master Protein	TGGT1_243960-t26_1-p1	transcript=TGGT1_243960-t26_1 | gene=TGGT1_243960 | organism=Toxoplasma_gondii_GT1 | gene_product=NTF2 domain-containing protein [Source:UniProtKB/TrEMBL;Acc:A0A125YLE0] | transcript_product=nuclear transport factor 2 (ntf2) domain-containing protein | location=TGGT1_chrVI:2828443-2833407(-) | protein_length=797 | sequence_SO=chromosome | SO=protein_coding_gene | is_pseudo=false	MSVYSVHPSGAPASSGGGFHHSAQNTAFSGHHGYGGNSGLHPSSSARGAGYGQPHHLQQQQMQLHLQQPPLPPPPHHQQYQGFTNAGNYSQQHNQSAQQLPQQGHPHSYAQPNAMSGASTLGSSSTFMFPSQGGAGGAPAGSSGPSAPLMMDGQGSGPLGAQVTSVAQQGPEAEHAVHAAAKPRMLTPMEVAHSFVYQYYYMLHDTPLDLHRFYDFDSQMIRTTDRDGTVPHSAPHHTDVRATGQREIYRAFERGRFERTTCRVRFIDAQENKDGGMLILVAGRLKHADEGPEREFAQTVFLAKQKAPRNGWYVTNEIFCYLDAAVEEVENGAREAVVPSSPSPRSRATAQDAPFQQGESSPTTVEAPATTSLVPEQSSPRGSVGGDSVRAPNAPATPI…	0	102.074	32	23	47	23	797	84.1	9.04	103.44	23	1.009	1.018	1.015	0.999	1.008	1.017	1.014	1.019	1.019	1.055	0.01	0.03	0.02	0	0.01	0.02	0.02	0.03	0.03	0.08	0.400232	0.0677211	0.180189	0.972529	0.858697	0.635987	0.663364	0.579547	0.670392	0.167793	0.996674	0.989773	0.971021
FALSE	High	Master Protein	TGGT1_244880-t26_1-p1	transcript=TGGT1_244880-t26_1 | gene=TGGT1_244880 | organism=Toxoplasma_gondii_GT1 | gene_product=DNA-directed RNA polymerase subunit [Source:UniProtKB/TrEMBL;Acc:S7USW6] | transcript_product=DNA-directed RNA polymerase I RPA1 | location=TGGT1_chrVI:3471329-3494157(+) | protein_length=2768 | sequence_SO=chromosome | SO=protein_coding_gene | is_pseudo=false	MYDANATICSSVHSASLTLFSQDEVRALSSCKISDTNVFLDPHASSSSLSATFTAARGGGPVAVSGGLHDSRLGSLDGREICETCGCRSDCPGHLGHIDLALPVFQPIFLPSLVKVLKLSCLHCERLRVSTPAASLFVKAFELLQLGCFDEVEEASRCASSALRAPTRGGSAGLALPQSQRVAVLRIFRKIEEELQRRAGADAPLAASREAPASPAKGAQASVEFEDLEERASPGETRRKTRETQAAVTEKDEAKEQQRVARLLSESTDFEKEKTRLLLHSFGSDISATAWQVATWRKLRDLLWTRAAASSVCANCGRSSAVTFHVAQQATGVEMRWKWTGQPPFDKNSALFSFLRNATPRREEEGEGRKKSDAKDDAAALFDERCLTYGKSGRAIGKL…	0	101.948	13	30	43	29	2768	301.9	7.21	89.23	30	1.036	1.037	1.006	0.95	0.984	0.985	0.955	0.98	1.009	0.994	0.05	0.05	0.01	-0.07	-0.02	-0.02	-0.07	-0.03	0.01	-0.01	0.281607	0.0375822	0.825575	0.256296	0.750584	0.585249	0.470782	0.136502	0.775407	0.849364	0.996674	0.989773	0.984106
FALSE	High	Master Protein	TGGT1_220900-t26_1-p1	transcript=TGGT1_220900-t26_1 | gene=TGGT1_220900 | organism=Toxoplasma_gondii_GT1 | gene_product=hypothetical protein | transcript_product=hypothetical protein | location=TGGT1_chrII:27409-29529(+) | protein_length=706 | sequence_SO=chromosome | SO=protein_coding_gene | is_pseudo=false	MALNITAPPSPLASDTVTSPAAGKPREDSLPASPVAAVSRGSSFPASPSSAAGRTETAPKAEDSPKAGSRRPSFLSLKKKRTEQGNEADNAEEPRQSRRNSFANKAKALLGKATKGDSKSVNDDEVDSTSAAAEASEKAEELATSPKAESRTDKWRRRLSLSRDRSVERGLTANEEGTAGVKGLGSEPASPQNDTPESRLGRLKRRLSLSKDGDRSRRQSHVAEAENGKANEGEQSEKQDEAANSQETPADVSAVKEETENEPAPTMQVSEANSQTASPTNEKSESRRDKWRRRLSLSRDCSVERSEKGENMPKSPAADEESSTKRFLRRLSISSREEKRNSDSEREGEPKEGRLSRLRRRLSISKKEKESEEQAEEGASSEVEKEGRGRRLLRRLSVS…	0	101.897	32	17	38	17	706	78.1	6.62	91.61	17	0.984	0.933	0.966	1.021	1.006	0.953	0.987	1.028	0.995	0.951	-0.02	-0.1	-0.05	0.03	0.01	-0.07	-0.02	0.04	-0.01	-0.07	0.533415	0.402352	0.13675	0.529319	0.913539	0.632862	0.737089	0.139614	0.0313017	0.502783	0.996674	0.990049	0.971021
FALSE	High	Master Protein	P11021	Endoplasmic reticulum chaperone BiP OS=Homo sapiens (Human) OX=9606 GN=HSPA5 PE=1 SV=2	MKLSLVAAMLLLLSAARAEEEDKKEDVGTVVGIDLGTTYSCVGVFKNGRVEIIANDQGNRITPSYVAFTPEGERLIGDAAKNQLTSNPENTVFDAKRLIGRTWNDPSVQQDIKFLPFKVVEKKTKPYIQVDIGGGQTKTFAPEEISAMVLTKMKETAEAYLGKKVTHAVVTVPAYFNDAQRQATKDAGTIAGLNVMRIINEPTAAAIAYGLDKREGEKNILVFDLGGGTFDVSLLTIDNGVFEVVATNGDTHLGGEDFDQRVMEHFIKLYKKKTGKDVRKDNRAVQKLRREVEKAKRALSSQHQARIEIESFYEGEDFSETLTRAKFEELNMDLFRSTMKPVQKVLEDSDLKKSDIDEIVLVGGSTRIPKIQQLVKEFFNGKEPSRGINPDEAVAYGAA…	0	101.868	36	21	46	17	654	72.3	5.16	124.96	21	0.993	1.001	0.957	1.025	1.018	1.026	0.981	1.011	1.024	1.004	-0.01	0	-0.06	0.04	0.03	0.04	-0.03	0.02	0.03	0.01	0.685515	0.892161	0.396971	0.718786	0.729901	0.673064	0.528643	0.747023	0.780598	0.954065	0.996674	0.998909	0.971021
FALSE	High	Master Protein	TGGT1_249990-t26_1-p1	transcript=TGGT1_249990-t26_1 | gene=TGGT1_249990 | organism=Toxoplasma_gondii_GT1 | gene_product=hypothetical protein | transcript_product=hypothetical protein | location=TGGT1_chrXII:4909167-4913985(-) | protein_length=838 | sequence_SO=chromosome | SO=protein_coding_gene | is_pseudo=false	MAPAGLSAGCSPAGAFLTRKLNAFSARKLLFKTTFFVLFHLTLSVCLVSIRLPEQSWPSLLRCTAAAPGASTSVGPAETGSGGGDNSTSAVSNKSATKDAHNAKAGESAASSSLPGGESEDFKDRESLRLWNVDEAEAAEIKNRLASMRIHAGSLTDKFMENVARLTAQIDILRLEVNKAKGEIQRLNESFDDQTEETLRVIDNRSAEFIRGLSLVEDQLDEQLQPPSGVVYRHLQDLRNRLTEIRVAAEKNFHTEASSVMQQIDTCSAKVDDLTRLYFEMRRRMDVEVSDIDTRLISARHELEDLVQERLNQLGASEQRITAEAMKRLREFLQNLHLEENMLQDIVQNIQREFLEPSAFPGAGAHREKGATYIDLSSYFSSSKIEKVCSVMSHLVKQL…	0	101.536	27	21	30	21	838	92.7	8.25	94.84	21	0.993	0.999	0.981	0.984	0.977	0.983	0.965	0.974	0.971	0.97	-0.01	0	-0.03	-0.02	-0.03	-0.02	-0.05	-0.04	-0.04	-0.04	0.796376	0.841932	0.230453	0.764666	0.775626	0.768409	0.601504	0.199641	0.473949	0.383003	0.996674	0.996893	0.971021
FALSE	High	Master Protein	TGGT1_262620-t26_1-p1	transcript=TGGT1_262620-t26_1 | gene=TGGT1_262620 | organism=Toxoplasma_gondii_GT1 | gene_product=RNA recognition motif-containing protein [Source:UniProtKB/TrEMBL;Acc:A0A125YHM1] | transcript_product=RNA recognition motif-containing protein | location=TGGT1_chrVIIb:1093901-1096823(+) | protein_length=293 | sequence_SO=chromosome | SO=protein_coding_gene | is_pseudo=false	MPADEQQQQLPREGTASTEPTCRVYVGNLSWKVRWQHLKDHMKQAGEVLRADVFEDFQGRSKGCGIVEYTNVEDAQKAIKELTDTELFDRLIFVREDREDGQKFSGGRGGGYGSRGGYGARGGGPMWAGGYYGGGMYRGRGGGGYYGGYGGRFNGPPPYNMYGDMGYYGGPRAFRGRGGMRGGMRGGFGAYGGGFRGGRGGYAGGAGGHGDGSGRQVFISNLPWRTSWQDLKDLFRECGDVVRADVMTMPDGRSKGVGTVLFSTPEGAQRAVEMFNEYMLDGRPISVRIDRVA	0	101.278	54	13	73	13	293	31.7	9.07	181.4	13	0.988	0.99	0.983	1.022	1.009	1.011	1.005	1.019	1.007	1.015	-0.02	-0.01	-0.02	0.03	0.01	0.02	0.01	0.03	0.01	0.02	0.396111	0.643986	0.23092	0.616046	0.750986	0.58759	0.878857	0.677427	0.79217	0.550815	0.996674	0.990049	0.971021
FALSE	High	Master Protein	TGGT1_225860-t26_1-p1	transcript=TGGT1_225860-t26_1 | gene=TGGT1_225860 | organism=Toxoplasma_gondii_GT1 | gene_product=hypothetical protein | transcript_product=hypothetical protein | location=TGGT1_chrX:1897405-1902365(-) | protein_length=1057 | sequence_SO=chromosome | SO=protein_coding_gene | is_pseudo=false	MDAEMRLGVGRADCRHSSRRPNLSSGNISFQNLVLLSVCCVSVGIAGGPLCRQVAGLSLPSSSVSRAFIPKLDPSLLSPTRHSVESSEMPDSARDFSALSRGESLSHSAFESTGEGDPSSRTTFRSSSAVSAEAAFPAATEGVLTRLGSGRGGRRRSRDRAGAAASTLLPTFGFSFTEKRGEDGSAAGSEAKGNSESAQTDQKSQHESADVKESSSATAENKSSDDFPESSSDYHPLRGLFHRMLSPVIPFLSPPPIRSATRMTILSPVNFLHSLWTPRISIITSVRNEDEKDEESSASESSEKQAGASGETSTTTTTTTTVSTSSVDESETSGASESAASGVEHEQKTGGSATEARDQPRAPEGAAEVQETAQAAEENGTAEEATRGAEAASPETTRG…	0	101.189	30	24	34	24	1057	111.4	4.75	80.85	24	1.032	0.979	0.976	1.01	1.043	0.989	0.986	1.039	1.025	1.032	0.05	-0.03	-0.03	0.01	0.06	-0.02	-0.02	0.05	0.04	0.05	0.571083	0.482791	0.286639	0.849327	0.698923	0.695909	0.83895	0.670428	0.56686	0.534235	0.996674	0.990049	0.971021
FALSE	High	Master Protein	TGGT1_310900-t26_1-p1	transcript=TGGT1_310900-t26_1 | gene=TGGT1_310900 | organism=Toxoplasma_gondii_GT1 | gene_product=AP2 domain transcription factor AP2XI-2 [Source:UniProtKB/TrEMBL;Acc:S7UT79] | transcript_product=AP2 domain transcription factor AP2XI-2 | location=TGGT1_chrXI:1609168-1617013(-) | protein_length=2243 | sequence_SO=chromosome | SO=protein_coding_gene | is_pseudo=false	MASGTPESEANSKAAARPGGFALSLRSRRVSSSSTDPVSALSLLRETPPRGVPGNASTPGKSQELAGLCGSRSPFQSKGSREEKDKKNRLLSRRLATSSGSSTIRRTSSSTSASSTSDANALVPTAVGSEAVSRTSGDSVSSMLPFLTSLSSISGAEDDDGTERKKSEAASVAAGEAPDVLVPPEEPRAKASSPQSSLEGGDGLETKEEEREKRPADGARGSLSLHEERRKKAQGSGLEKPQSESLSRSNTMASNVPSKACMGGSDEDKRSLSRMGSGFSSFSVQEGNPVALRDGSGKIGASRQEEKSKTAEAGPLDPGSQLLDVATVSSTFATLSNEEGGAQETANRLASSGDSRQDPDSNVAVPTSPDTASAFVKQSLSLGGPGKAMGEGAGVYWPP…	0	101.125	16	26	36	26	2243	232.6	6.24	56.51	26	0.998	1.017	0.956	1.023	1.021	1.04	0.978	0.965	0.925	0.969	0	0.02	-0.06	0.03	0.03	0.06	-0.03	-0.05	-0.11	-0.05	0.990066	0.452694	0.199907	0.505993	0.832512	0.484528	0.660953	0.705206	0.358186	0.706454	0.999123	0.990049	0.971021
FALSE	High	Master Protein	P13645	Keratin, type I cytoskeletal 10 OS=Homo sapiens (Human) OX=9606 GN=KRT10 PE=1 SV=6	MSVRYSSSKHYSSSRSGGGGGGGGCGGGGGVSSLRISSSKGSLGGGFSSGGFSGGSFSRGSSGGGCFGGSSGGYGGLGGFGGGSFRGSYGSSSFGGSYGGIFGGGSFGGGSFGGGSFGGGGFGGGGFGGGFGGGFGGDGGLLSGNEKVTMQNLNDRLASYLDKVRALEESNYELEGKIKEWYEKHGNSHQGEPRDYSKYYKTIDDLKNQILNLTTDNANILLQIDNARLAADDFRLKYENEVALRQSVEADINGLRRVLDELTLTKADLEMQIESLTEELAYLKKNHEEEMKDLRNVSTGDVNVEMNAAPGVDLTQLLNNMRSQYEQLAEQNRKDAEAWFNEKSKELTTEIDNNIEQISSYKSEITELRRNVQALEIELQSQLALKQSLEASLAETEGR…	0	101.008	36	22	61	19	584	58.8	5.21	135.25	22	0.783	0.863	0.988	0.714	0.56	0.616	0.705	0.767	0.75	0.529	-0.35	-0.21	-0.02	-0.49	-0.84	-0.7	-0.5	-0.38	-0.42	-0.92	0.218816	0.566877	0.950002	0.754	0.639905	0.589638	0.783462	0.842733	0.782034	0.515295	0.996674	0.990049	0.992295
FALSE	High	Master Protein	TGGT1_244470-t26_1-p1	transcript=TGGT1_244470-t26_1 | gene=TGGT1_244470 | organism=Toxoplasma_gondii_GT1 | gene_product=hypothetical protein | transcript_product=hypothetical protein | location=TGGT1_chrVI:3203997-3215302(-) | protein_length=2595 | sequence_SO=chromosome | SO=protein_coding_gene | is_pseudo=false	MHPHLSSAEPQEPSGDVSPTASSQLGSPARSTVVDRGDVDLPSHLLSRDSFATSVAVSRVPEEPCAGTTAQRFDSSESEYPPPVSIFPQKYAADVSLVPGTAKAEGQESEGAQATALLQEPPSEDSPSLESKPLGASSFHRDTDNQPDPCAAPRESTVVTECRPEILVTSERESAVSLQRPPQDVGTEKPTTDGLPPSRSPLPGKSVANVAVRVSAHPVTRSVVEVPVRESDLRPKVAASRPAPQVAPWRVDQETEAYPREEVSSDDELRAGAPAQPSLVTRSALPGMPSQPLARQPCPDPGAGIALAQAGFEPVLGAAGAPALRRSEPSVTGAVRNQAASSPPETELVPSGNRDNIAAPPGTRVAARHSEEVKSSPAEITEDTQFPSSAPPSFLGAPK…	0	100.711	14	35	39	35	2595	290.1	6.04	74.47	35	1.009	0.96	1.007	1.035	1.045	0.994	1.043	1.006	1.013	0.987	0.01	-0.06	0.01	0.05	0.06	-0.01	0.06	0.01	0.02	-0.02	0.668365	0.137615	0.647876	0.719894	0.710246	0.944829	0.709741	0.943616	0.886971	0.651699	0.996674	0.989773	0.975418
FALSE	High	Master Protein	TGGT1_292220-t26_1-p1	transcript=TGGT1_292220-t26_1 | gene=TGGT1_292220 | organism=Toxoplasma_gondii_GT1 | gene_product=PCI domain-containing protein [Source:UniProtKB/TrEMBL;Acc:A0A125YZM3] | transcript_product=PCI domain-containing protein | location=TGGT1_chrIX:4423653-4430460(+) | protein_length=561 | sequence_SO=chromosome | SO=protein_coding_gene | is_pseudo=false	MAQDATAAPPAGAAGAAGAAEKKSAASSPLLTLCIAVEQLRQGVEQQDDRQVTRMFRQFKTLRTTCTPHTLLLVASRLLWNSDPGNAKANAEPEQGAGSSAPATTADAARSTRDEATLAFWKAMQRALHAAGAEDGTQAMDVDIPPPPAESFPLAAKDFASCLPEVEALLALLLLLRLIDSRRFAQAVEFGDLLVDRVLGSTPVGAPAPSGASETPLWRRRRLDLVGAKCIFYWYRARELDRALTPHVRAKLLNAYTVASVQHDTMTQATVLNLLLRNYIASNQYELALKLISKACFPENLRSNAQQARHLYYLGCIQAVRLEYSAAFAKLQLALRKAPQQPRVAAGFRLAVLKKAIVVELLMGDIPERAIFSRKETRAALLPYKHIVLAVRSGDLHAF…	0	100.669	46	22	41	22	561	61.6	7.49	115.62	22	0.987	1.027	1.007	0.977	0.964	1.003	0.984	0.976	1.013	1.02	-0.02	0.04	0.01	-0.03	-0.05	0	-0.02	-0.03	0.02	0.03	0.533362	0.336257	0.0553629	0.267881	0.384603	0.923955	0.376141	0.308104	0.678972	0.623059	0.996674	0.990049	0.971021
FALSE	High	Master Protein	TGGT1_234230-t26_1-p1	transcript=TGGT1_234230-t26_1 | gene=TGGT1_234230 | organism=Toxoplasma_gondii_GT1 | gene_product=hypothetical protein | transcript_product=hypothetical protein | location=TGGT1_chrX:4104920-4121364(-) | protein_length=4625 | sequence_SO=chromosome | SO=protein_coding_gene | is_pseudo=false	MPEPTQCTSSSLPHSASSDVSDLSASSPSPPSRVCSVVSDAWPRETFVSSSAPTATDAPSEASSSTLPSSLVSSFSSSIDFQSPSPRWGPSVPRMLTRRSGKTCTVSRASDPPSCCPPSVPMCLDEIRAPLPKAWRGRGKKSRARSRFSPDSLQEYPESWEGVDEGEETESEKEARASGREDAKNVGRSEGVPEGARCVDWERGSREDGHNSQREGCGVEVEKKEDEEDVSLSSRCRQPLRDYPCESEHRSGSGQRRNHLEREDCAEVSEDIGRDAYQGEPSRTEGEERETSYEGRTCCPHQDGETGHPSSDTPLSSSLSSPPSSFQAPRAVHELSMLEASSLLLSETPTLRTPHTSSSSSHLSRASSSGGSSASLSERREEGGSLHTAIAGSPTSSTC…	0	100.565	9	31	39	31	4625	490.3	5.66	55.77	31	0.986	1.016	0.991	1.012	0.997	1.027	1.003	1.025	1.016	1.016	-0.02	0.02	-0.01	0.02	0	0.04	0	0.04	0.02	0.02	0.812483	0.872813	0.241907	0.653732	0.973273	0.82524	0.925295	0.828919	0.847049	0.726775	0.996674	0.998909	0.971021
FALSE	High	Master Protein	TGGT1_311240-t26_1-p1	transcript=TGGT1_311240-t26_1 | gene=TGGT1_311240 | organism=Toxoplasma_gondii_GT1 | gene_product=Putative DnaJ family chaperone [Source:UniProtKB/TrEMBL;Acc:S7UT35] | transcript_product=putative DnaJ family chaperone | location=TGGT1_chrXI:1865804-1870827(-) | protein_length=426 | sequence_SO=chromosome | SO=protein_coding_gene | is_pseudo=false	MYFGSFPFGDDMRGPGPRRGGSKEKNNTKFYEILEVDRTASVADIKKSYRKLAIKHHPDKGGDPEKFKEISRAYEVLSDPEKRRIYDDHGEEGLENGGAGADPTDIFDLFFGGGRRASRQPSKKKGEDIVSAMKVTLEQMYSGATKRMAINKDVLCKQCNGVGGPADALTTCHDCDGHGVKVVTRQIGPMIQQTQSVCPACKGAGKSMDPSKRCKSCTGKGVVKERKILEIYIEKGAKNHHKVIFRGDADERPNEIPGDVIFILEQQEHAVFKRRGNDLFMTKKISLLESLCGFKFVLTHLDGRQLLIQSPPGTVTKPDAVQIIKGEGMPQQKNPFLKGDLFIVFEVEFPEHVSDADAKSLSQILPKPTEAVMVSEDDPHVEVHVAEPVDPDELRNRQQ…	0	100.544	39	14	49	14	426	47.4	6.84	133.91	14	1.028	1.028	1.019	1.005	1.033	1.033	1.024	1.025	1.015	1.042	0.04	0.04	0.03	0.01	0.05	0.05	0.03	0.04	0.02	0.06	0.302154	0.209901	0.528511	0.760198	0.439743	0.0715954	0.605721	0.568128	0.847808	0.208606	0.996674	0.989773	0.973444
FALSE	High	Master Protein	TGGT1_223710-t26_1-p1	transcript=TGGT1_223710-t26_1 | gene=TGGT1_223710 | organism=Toxoplasma_gondii_GT1 | gene_product=Tetratricopeptide repeat-containing protein [Source:UniProtKB/TrEMBL;Acc:S7UW94] | transcript_product=tetratricopeptide repeat-containing protein | location=TGGT1_chrX:3542707-3551157(-) | protein_length=964 | sequence_SO=chromosome | SO=protein_coding_gene | is_pseudo=false	MSKARPGSSGTNALPSKEQSLFKNLVYLYEHKHFKKAIKQADLILKKCPDHGETLSMKGLVLSNMKPENKQEAYELAKRGLRCDLKNYVCWHVLGLIYRADKDYFEAAKCFTQAVRLSPGNFQILRDLSNLQIHERNLEGFRETRRQILATRSQFIREWTAFALANHLCGSLDVAHDLLSEVEKQFEDARDMDSFDKSEIILYSASILEQAGRFEDCMKYLKEREEKITDKMSMLEMQGRLALHCGHREEARKVYSALFKRNQDNDIYALCLLACSEDPQLSRLCKLPISDSANGGLNEQGVCVELLPGCLASTGEGRAGWLPSAETRKALRRLAHLDKNVIPFTGWKRKRNSTPSPLFVVTRIPTDAEQDRLISFFDCLKSEYGKVCSLPSFLVLSFL…	0	99.879	24	23	39	23	964	109.2	8.59	106.48	23	0.972	1.012	1.004	1.047	1.017	1.059	1.051	1.05	1.051	1.077	-0.04	0.02	0.01	0.07	0.02	0.08	0.07	0.07	0.07	0.11	0.121364	0.479151	0.822858	0.21656	0.577975	0.281448	0.355968	0.533049	0.268266	0.267669	0.996674	0.990049	0.984106
FALSE	High	Master Protein	TGGT1_360830-t26_1-p1	transcript=TGGT1_360830-t26_1 | gene=TGGT1_360830 | organism=Toxoplasma_gondii_GT1 | gene_product=Nucleoside-triphosphatase [Source:UniProtKB/TrEMBL;Acc:S7UZG2] | transcript_product=nucleoside-triphosphatase | location=AAQM03000066:41-1153(+) | protein_length=370 | sequence_SO=contig | SO=protein_coding_gene | is_pseudo=false	MIDEYGVKHCRNDLAGVVEVGGASAQIVFPLQEGTVLPSSVRAVNLQRERLLPERYPSADVVSVSFMQLGMASSAGLFLKELCSNDEFLQGGICSNPCLFKGFQQSCSAGEVEVRPDGSASVNEDVRKNRLKPLATYCSVHNPEISFKVTNEMQCRENSIDPTKPLAERMKIENCSIIEGTGNFDKCVSQVESILVAPKLPLPANIEAASSGFESVDQVFRFASSTAPMFITGREMLASIDTLKDHRLLRSDFSGDVEELAEAAREFCSSEVIIRTDGPVIQLPNARGEQKLNSLNFDLCKTMALTVSLLRHMAAGENQPSFIKWEKSIAGPDGKPLADLGWQVGVILHHVLFTEEWGRNAYEAGYSHNL	0	99.873	50	14	58	4	370	40.5	5.22	125.75	14	0.953	0.896	0.88	1.106	1.054	0.991	0.973	1.005	1.006	1.018	-0.07	-0.16	-0.18	0.14	0.08	-0.01	-0.04	0.01	0.01	0.03	0.301603	0.366974	0.338594	0.445853	0.543232	0.603895	0.20939	0.882102	0.875243	0.374381	0.996674	0.990049	0.971021
FALSE	High	Master Protein	TGGT1_309730-t26_1-p1	transcript=TGGT1_309730-t26_1 | gene=TGGT1_309730 | organism=Toxoplasma_gondii_GT1 | gene_product=Thioredoxin reductase [Source:UniProtKB/TrEMBL;Acc:S7W164] | transcript_product=thioredoxin reductase | location=TGGT1_chrXI:735920-743442(-) | protein_length=662 | sequence_SO=chromosome | SO=protein_coding_gene | is_pseudo=false	MSCLSVSAARAYAAAAASRPVSASFLPAFSRLSQCSFLSENCVLRCTSSVYPASHSTHRTNALQSTLSAVVPPERLPCTPLAHAAAVVAVWNSGSLLVSTPLFSVCRTETSSCAPPAQRQQERAFASERKLSVISTNASEMAPTNTNNGAPSCADGEFDYDLAVIGGGSGGLACAKMAAAQGAKTVVFDFVQPSTQGSTWGLGGTCVNVGCVPKYLFHHTGLAGANAHWDGPHMGWKGKFEEQVDWGVCVEKVQNYIKSLNFGYRTGLRKAGVTYINAYAKFVSPHELAYTFRGEDKICKARNIVVAVGGRPHIPEEVEGAKELAITSDDIFSLKQAPNKTLCVGASYISLECAGFLRELGFDVTVAVRSILLRGFDRQCAEQVGLCLEEAGVRILRET…	0	99.828	22	12	26	12	662	70.6	6.67	91.05	12	0.98	1.004	0.974	0.986	0.966	0.99	0.96	1.004	1.012	1.034	-0.03	0.01	-0.04	-0.02	-0.05	-0.01	-0.06	0.01	0.02	0.05	0.0516221	0.859861	0.339531	0.611045	0.359878	0.0729993	0.0742127	0.935193	0.387416	0.404114	0.996674	0.997431	0.971021
FALSE	High	Master Protein	TGGT1_310080-t26_1-p1	transcript=TGGT1_310080-t26_1 | gene=TGGT1_310080 | organism=Toxoplasma_gondii_GT1 | gene_product=AMP-binding domain-containing protein [Source:UniProtKB/TrEMBL;Acc:S7USA9] | transcript_product=AMP-binding enzyme domain-containing protein | location=TGGT1_chrXI:1008086-1011664(-) | protein_length=789 | sequence_SO=chromosome | SO=protein_coding_gene | is_pseudo=false	MALQYAYPVDSPRPGESAIWRCAKYEEAMAPEAPRAPERGSFLTSFDLEASDCSAQNAFPEGACPPISGWWHSAYGVFRVGKSRAGGGARCMGARPLPTDKEFFYWTFDEADEKARLLGSGLTELLREGVVSVETFADETRNGGKFANVGILLHSRREWILTDLAISAYPPLTSVTLHYTFPPDHMKAILLEAGVSTLVTDVEQLKVVNELKADLPLLRGLVVVNLAEETARLAAEKPEEKEKLLKLVEELRAKDVQVFDFQDILEKGRRAYIPPIMEQDPERIFTIVYTSGTTGNPKGVMMSNRNFVREIQGCLHINDYTLMLDDDFLHFALLPLSHVFERMVEYVAYGFGAAVAYFSRKKELLADDWRFARPSCLIMVPRVAALVLDSIETQMQQLP…	0	99.648	30	21	63	20	789	87.8	5.6	136.06	21	0.999	1.016	1.014	0.998	0.997	1.014	1.013	1.002	1.024	1.01	0	0.02	0.02	0	0	0.02	0.02	0	0.03	0.01	0.734476	0.371862	0.586087	0.937012	0.916354	0.712552	0.794674	0.965195	0.695897	0.806754	0.996674	0.990049	0.975418
FALSE	High	Master Protein	TGGT1_321640-t26_1-p1	transcript=TGGT1_321640-t26_1 | gene=TGGT1_321640 | organism=Toxoplasma_gondii_GT1 | gene_product=Cell division protein CDC48AP [Source:UniProtKB/TrEMBL;Acc:S7UJ74] | transcript_product=cell division protein CDC48AP | location=TGGT1_chrIb:1672063-1681153(-) | protein_length=1044 | sequence_SO=chromosome | SO=protein_coding_gene | is_pseudo=false	MGTAWCPLEGAGWDSSASSFRRGLGLRRLLSLSVFLLLPFPFIFLSPAHAVVRLPPSPAPPVSPSFTSSRFSGRRLRSPSEMGAERPTSRVPPAAILSSFENREREQRAKSTLKAAAEAASSARTTGSSCPTSCSSLASSLSSPIFTDPPLTDVRSIAPHCPSTSSSPSSSLSSSLSSSPSSSPSSSLSSSPSSSLSSSLSSSPSSSPAASLSSSSLSSLVSSLRGGRSFFSSSPPSPTAPVAGNLFVVKGSHARDPSVVFLSPRDMAALQVQRGDVVLLSGRRKRETVAIAMPDRSLEARHVVLHAHALKNIKLHAQDAIKVTPQRLLPHARRVFVLPFSDTLGDVRDGGAGRSEGRDRDAPGEKPSVEAVATKFFRHTSRPVKLGDQFVLEFPVHAK…	0	99.411	27	24	42	24	1044	112.8	7.5	111.38	24	1.011	1.011	0.997	0.991	1.001	1.002	0.988	0.989	1.016	0.991	0.02	0.02	0	-0.01	0	0	-0.02	-0.02	0.02	-0.01	0.792968	0.641344	0.914237	0.626382	0.979892	0.959419	0.797415	0.881968	0.729382	0.806673	0.996674	0.990049	0.992295
FALSE	High	Master Protein	TGGT1_205220-t26_1-p1	transcript=TGGT1_205220-t26_1 | gene=TGGT1_205220 | organism=Toxoplasma_gondii_GT1 | gene_product=PRP1_N domain-containing protein [Source:UniProtKB/TrEMBL;Acc:S7UTZ4] | transcript_product=putative U5 snRNP-associated subunit | location=TGGT1_chrVIIa:1443394-1451209(+) | protein_length=1113 | sequence_SO=chromosome | SO=protein_coding_gene | is_pseudo=false	MQAPRQPASLMPGARRFMPGVGSGPSGPYVAGVGRGATPFSTRAETPGLHSVPGRRTDNLMNKAALQASAGVMVGGELSSSARTAAELFGRPPPGYIPGRGRGATGFAGGVSRDDTATDNVHDKSDLSDANFDPFTGYSEALFNDAEYDEEDKEADRIYDTVDMRMDARRKSRRENRLKEEIAKMRAEKPTIHQQFADLKRSLATVTKEEWEAIPSVGDYTLKRKQKKPQMFSMAPDSLLLQGRNSTSYSNSIASAGSATPIGFGMQTPLMGMATPLGLQTPLGLRTPLLGSGSGTGSSGAGTPSLNDLGEARGTVLSVKLDKVMDNLSGQTVIDPKGYLTDLNSMQLQSDADVADIKKARTLLKSVTATNPHHAPGWIAAARLEELAGKLQAARELIA…	0	99.37	28	31	45	31	1113	122.7	8.88	88.7	31	1.057	1.023	1.006	0.946	1	0.968	0.951	0.958	0.978	0.977	0.08	0.03	0.01	-0.08	0	-0.05	-0.07	-0.06	-0.03	-0.03	0.167612	0.591215	0.887344	0.462892	0.995116	0.33224	0.223128	0.404832	0.587286	0.0688507	0.996674	0.990049	0.991016
FALSE	High	Master Protein	TGGT1_253430-t26_1-p1	transcript=TGGT1_253430-t26_1 | gene=TGGT1_253430 | organism=Toxoplasma_gondii_GT1 | gene_product=Glutamine amidotransferase type-2 domain-containing protein [Source:UniProtKB/TrEMBL;Acc:A0A125YQ67] | transcript_product=putative asparagine synthetase | location=TGGT1_chrIII:924367-930594(+) | protein_length=588 | sequence_SO=chromosome | SO=protein_coding_gene | is_pseudo=false	MCGILAILMSSLSRDQLRQLALERSRLSVFYRGGLDQECMGKSLWLRHRGPDSNGVHVQEYSTTLCNALAHERLAIVDPATGKQPLCDASGTFVCVANGEIYNHVELTKTLLPPEEVAKWKTASDCQPLPSLFKFHGPSICDKLDGIFSFVISNGATGEFIAARDPLGVCSLYVGYASDGSIWFASELKALTRDCEQVTVFPPGHFYLSTMNEGKGGFQRYYNPSWWGVDKPLPTYRCDLGQLREALEAAVRKRLMCDVPFGLMLSGGVDSSIIAAIAAKEFQKMSATEKGSHIWTNQIHAFSIGLKDGPDRKFAKMVADMLGTVHHEFTFELEEGLDALDDVIYMIETYDITTVRASVPMYLLCRMIKSLGVKVVLTGEGADEVFGGYLYFHSAPNRE…	0	99.367	33	18	51	18	588	65.8	6.73	138.41	18	1.003	1.014	1.018	1	1.003	1.014	1.018	1.008	1.012	1.046	0	0.02	0.03	0	0	0.02	0.03	0.01	0.02	0.07	0.769913	0.0581886	0.22133	0.989864	0.687776	0.528048	0.25746	0.827716	0.450264	0.111448	0.996674	0.989773	0.971021
FALSE	High	Master Protein	TGGT1_203780-t26_1-p1	transcript=TGGT1_203780-t26_1 | gene=TGGT1_203780 | organism=Toxoplasma_gondii_GT1 | gene_product=hypothetical protein | transcript_product=hypothetical protein | location=TGGT1_chrVIIa:2142786-2147213(+) | protein_length=1475 | sequence_SO=chromosome | SO=protein_coding_gene | is_pseudo=false	MAFPSPFFSGAVPSAAGGPERRPNTQRPIHRADPYAASLLGRLASKLASSVSSFFSSAPARKSPSVGVSTSSSHAVRLAPVRGSAPSPSLWGASELSADGEATGREVTVVRQPTSSRQSLAEVLNPSLWPRDNSFHSSLALPRQGEPACLHPGSDPAAQSHDVLTLSTSGAVHYLQSSSPPDMSDRAGTQWRRLDAVPASTSVSPNGDMQMGWQSQVADQTTFVPRAAPLYGDGVRGLQVHFPAAGDPLSNLEASASRLTQQQWLLQQGATGPQPVMEGTVIPTPAHTGYPPQSIERPVTVSSRAFSGYAIPGEPLAQPALRPTFNGHHTRVAPAASHSLFPTEERVASSLLAAGPIRRRGSEARATPASGPPVPVLRLHPRRDSRSAAGSLLRQEEHL…	0	99.162	19	20	33	20	1475	145.1	7.24	99.11	20	1.013	0.963	0.96	1.027	1.04	0.989	0.985	0.996	1.027	1.03	0.02	-0.05	-0.06	0.04	0.06	-0.02	-0.02	-0.01	0.04	0.04	0.492103	0.515787	0.531434	0.540412	0.52558	0.448817	0.51477	0.829878	0.084477	0.0555767	0.996674	0.990049	0.973444
FALSE	High	Master Protein	TGGT1_273370-t26_1-p1	transcript=TGGT1_273370-t26_1 | gene=TGGT1_273370 | organism=Toxoplasma_gondii_GT1 | gene_product=Coatomer subunit gamma [Source:UniProtKB/TrEMBL;Acc:S7V3E5] | transcript_product=putative coatomer gamma 2-subunit protein | location=TGGT1_chrVIII:3554530-3558659(-) | protein_length=1044 | sequence_SO=chromosome | SO=protein_coding_gene | is_pseudo=false	MLSASSLRSKLQNLNVDLSKFSGSSSEKPQFTPYDCDKAKVLQEARAFSESPLNPKKCSQIITKILYLLSSNADPLTSAETSTVFFGVTRLFQSSDERLRRLIYMLLKELSVQTAEGFIVTSSLTKDMTSNSDRHRGNAVRVLSRIVDAAMVSQIERYLKTAIVDKNPFVASSGLVAGINLFHTAPEVVRRWVSEAHSCIFQHENAPVVQAHALVLLHAIKSSDRLALHKSLCELLQRFQRNPLAECLLIRYVKDLLLQDLSAGDASSPAYAYAAPPSLGAGGASDPSHQRLLLDYLESCLRHKHEMAMFEAARALCELAGAAADRGDAGTVFQSYDLSGALTVLQILLTSPKPVVRFAAVHVINKQAQKPRLASVLARCNAELEPLLSDPNRSIATAA…	0	99.058	25	24	43	24	1044	112.2	5.35	94.72	24	0.987	1.016	1.001	1.003	0.989	1.019	1.004	1.014	0.998	1.014	-0.02	0.02	0	0	-0.02	0.03	0.01	0.02	0	0.02	0.781391	0.396166	0.979165	0.944678	0.359072	0.503817	0.567944	0.319756	0.703429	0.486031	0.996674	0.990049	0.996623
FALSE	High	Master Protein	TGGT1_288210-t26_1-p1	transcript=TGGT1_288210-t26_1 | gene=TGGT1_288210 | organism=Toxoplasma_gondii_GT1 | gene_product=PUL domain-containing protein [Source:UniProtKB/TrEMBL;Acc:S7UQ70] | transcript_product=PUL domain-containing protein | location=TGGT1_chrIX:2194601-2205036(+) | protein_length=818 | sequence_SO=chromosome | SO=protein_coding_gene | is_pseudo=false	MASSPFLLAFEGAVHSKAVRCVCVVSKNALSSSSSSASASSLKPSFELVSGSLDSSVVVWSLEETPASRAPTGLVFSPRLCLQHHRDFVYCVAPCTADANIRSFFSGGKDKRALRIALDDGRVLMEYTGHEGPVCSLAEVAASSCLVTGSWDGSARLWNIASGECLRKLTQHKHAVSVLTLREPQLLVTGSQDKALNFWSISGHLEKTIPDAHDDIIRALDYLSLPSSSSASSSSSSPSSAVLSASNDQLVKAWSLDGSLLAQFEGHSAFVFDVTASRLRANVFFTASDDCTCKVWEVQDEESRRLSGRATQTLLHAATVWRVAELPTGDIVTCCEDGKLRVWTQDEARALPVAARMQQESEAKEAQAAAAAKSASSIDIASLPDVSQMASIRGQDGEM…	0	98.87	28	22	43	22	818	88.8	6.39	104.13	22	1.019	1.025	1.016	0.982	1.001	1.006	0.997	1.006	1.032	1.008	0.03	0.04	0.02	-0.03	0	0.01	0	0.01	0.05	0.01	0.462982	0.540278	0.265347	0.175264	0.963504	0.877984	0.379534	0.755615	0.18876	0.77753	0.996674	0.990049	0.971021
FALSE	High	Master Protein	P35908	Keratin, type II cytoskeletal 2 epidermal OS=Homo sapiens (Human) OX=9606 GN=KRT2 PE=1 SV=2	MSCQISCKSRGRGGGGGGFRGFSSGSAVVSGGSRRSTSSFSCLSRHGGGGGGFGGGGFGSRSLVGLGGTKSISISVAGGGGGFGAAGGFGGRGGGFGGGSSFGGGSGFSGGGFGGGGFGGGRFGGFGGPGGVGGLGGPGGFGPGGYPGGIHEVSVNQSLLQPLNVKVDPEIQNVKAQEREQIKTLNNKFASFIDKVRFLEQQNQVLQTKWELLQQMNVGTRPINLEPIFQGYIDSLKRYLDGLTAERTSQNSELNNMQDLVEDYKKKYEDEINKRTAAENDFVTLKKDVDNAYMIKVELQSKVDLLNQEIEFLKVLYDAEISQIHQSVTDTNVILSMDNSRNLDLDSIIAEVKAQYEEIAQRSKEEAEALYHSKYEELQVTVGRHGDSLKEIKIEISEL…	0	98.696	34	23	47	15	639	65.4	8	100.23	23	0.841	0.838	0.943	1.006	0.846	0.844	0.949	0.933	1.024	0.843	-0.25	-0.25	-0.08	0.01	-0.24	-0.25	-0.08	-0.1	0.03	-0.25	0.374219	0.139523	0.338539	0.984949	0.732167	0.579891	0.887589	0.907722	0.947149	0.580029	0.996674	0.989773	0.971021
FALSE	High	Master Protein	TGGT1_206590-t26_1-p1	transcript=TGGT1_206590-t26_1 | gene=TGGT1_206590 | organism=Toxoplasma_gondii_GT1 | gene_product=Calcium-dependent protein kinase CDPK2A [Source:UniProtKB/TrEMBL;Acc:S7W2U0] | transcript_product=calcium-dependent protein kinase CDPK2A | location=TGGT1_chrVIIa:775466-782202(-) | protein_length=786 | sequence_SO=chromosome | SO=protein_coding_gene | is_pseudo=false	MRDPFVNFCSDPLSFSQKLQRLYSAGASLCIFNPNLRNFPSDHVVPLAPRYMPEQSEVMGGRISRQRGGAQSQAPDPRHPNSSSTSGVARLGQSASPADRKVSSRHPHVAGQPHMSSRLQAPTPSQRGTSPASSEAGDQRSSSSGRTSAGRSRGAGLFSSTSTQKSKPSQSAKSTSATATLSPQPYTPTPESHRGGTGASPVTGRSPVSGTGKRCVPSPGAGAAAARDEAHSRHVIRHPSDSRQVAEAPISRDKEGGIDRSKFILENTGALTDFYEIDTATLGQGTYGSVSKARKKDTGQMRAVKTISKSQVKNLERFRQEIAIMKELDHPNVIKLFETFEDHRNIYLVMELCTGGELFDRIISEGRLTEKQAAVLMKQMFSAVHYLHSNNIMHRDLKP…	0	98.185	33	24	47	24	786	86.3	8.76	98.04	24	1.005	1.007	0.995	1.016	1.021	1.023	1.011	1.013	0.994	0.987	0.01	0.01	-0.01	0.02	0.03	0.03	0.02	0.02	-0.01	-0.02	0.879431	0.674187	0.888767	0.317547	0.644389	0.476348	0.802135	0.366137	0.523105	0.805547	0.996674	0.99327	0.991016
FALSE	High	Master Protein	TGGT1_279100-t26_1-p1	transcript=TGGT1_279100-t26_1 | gene=TGGT1_279100 | organism=Toxoplasma_gondii_GT1 | gene_product=hypothetical protein | transcript_product=hypothetical protein | location=AAQM03000427:32-1883(+) | protein_length=435 | sequence_SO=contig | SO=protein_coding_gene | is_pseudo=false	MWRIWRCRLSFLFVTGCLLGALTAGLGSQMSDSVGRNVQAPAGVADASQEAGDVVEERTERTEEQVFAPGPPRRHSSESLFPRNASVTARRRRNRRIALIATAVGVAVILAALYVLRRRRAQPPQEPEPPTRLRTPRPRAPSEQQQPSESEPPAEVPMTPDPLTLRFTCLGDRNVIFFGPSGRQDGFTPLYDPSPSKRVATVDAGTYGLFIGGVGMNGEFADTIIEEARRNRIPLTATELSAESQEIQERLLHDAERQPGTLVEIDSGRFSRVFARSFAYVAIVPNTVWDESETGKNVGATFLHILKPEVTPHGNEMNDVMLYTVAPFGNASDSAYNMAYKATMLGIVGAVSEYNKTPWGEVKPVEAIRLPLLGAGHFRGHRSLDSIGRANAAAVEAAI…	0	97.921	43	14	39	4	435	48	7.5	115.78	14	1.045	1.011	1.045	0.959	1.003	0.97	1.002	0.987	1.005	1.002	0.06	0.02	0.06	-0.06	0	-0.04	0	-0.02	0.01	0	0.51328	0.853898	0.226993	0.310653	0.929642	0.72829	0.778916	0.170191	0.791507	0.425542	0.996674	0.996893	0.971021
FALSE	High	Master Protein	TGGT1_224850-t26_1-p1	transcript=TGGT1_224850-t26_1 | gene=TGGT1_224850 | organism=Toxoplasma_gondii_GT1 | gene_product=Polyadenylate-binding protein [Source:UniProtKB/TrEMBL;Acc:S7UWI4] | transcript_product=putative polyadenylate binding protein | location=TGGT1_chrX:2687512-2689821(+) | protein_length=769 | sequence_SO=chromosome | SO=protein_coding_gene | is_pseudo=false	MATASPVVAPSSPASAPSQPSPMPASNAGADVPASGTGGHQAAADHTAGNANVSGGVSGTTPAPAGQRPNGGMNAGAANFVSPSLYVGDLHQDVTEAMLFEVFNSVGPVTSIRVCRDTVTRRSLGYAYVNYQGIQDAERSLDTLNYTVIKGQPCRIMWCHRDPSLRKSGNGNIFVKNLDKNIDNKALYDTFSLFGNILSCKVAVDDNGHSKGYGFVHYENEESARSAIDKVNGMLIGGKTVYVGPFIRRAERDNLAEAKYTNVYIKNMPSAWEDESRLRETFSKFGSITSLVVRKDPKGRLFAFCNFADHDSAKAAVEALNGKRVTDAGAIKEGEDSGAEEEKEEEGQKREGDQILFVGPHQSKAHRSAMLRAKFEQMNQDRNDRFQGVNLYIKNMDDS…	0	97.763	26	20	61	20	769	82.6	8.84	132.17	20	1.002	1.004	0.982	1.013	1.015	1.017	0.995	0.999	1.004	0.989	0	0.01	-0.03	0.02	0.02	0.02	-0.01	0	0.01	-0.02	0.888778	0.665897	0.228113	0.00709783	0.386242	0.250029	0.591041	0.948601	0.162286	0.145868	0.996674	0.990049	0.971021
FALSE	High	Master Protein	TGGT1_233000-t26_1-p1	transcript=TGGT1_233000-t26_1 | gene=TGGT1_233000 | organism=Toxoplasma_gondii_GT1 | gene_product=KOW motif domain-containing protein [Source:UniProtKB/TrEMBL;Acc:S7V342] | transcript_product=KOW motif domain-containing protein | location=TGGT1_chrVIII:2313902-2327775(-) | protein_length=1179 | sequence_SO=chromosome | SO=protein_coding_gene | is_pseudo=false	MQASPPSVSLHASPLVFLLPCFFRFFGATLLPLLAPPEIRFLVSRIPTLWISGIVANAAMSDTEDRQASREASEAEDAEENEEAFSGSDSSSSEEDEGERRRSKKSKKSSKRRSSTERRSRSRDGGRRKKRRAVNAFLDVEAQEGDDEEEEDNDDLFDYSEEAAQAARLAAQATERRVGSREDRAQQRRGGASHLESAIDSLTRRYQDQTFEEGEEEDDLDADGFALEDPNENNLLPDITDPKLWMVKLNKTGVEREVCISILNKSFQMQEKGKDCEIYSCYASDDLKGYVYVEAFSQYAIKEALQGLRLIRTYGEIKMVPLEEMTAVFNSVRSRAPYIPQRNDFVRVKRGLYANDIAQIHQVEEQGMVVTVRLIPRLDLNALLDREKRGDFSRKSDMA…	0	97.379	20	20	38	20	1179	127.2	5.81	92.55	20	0.999	1.013	1.039	1.028	1.028	1.042	1.068	1.027	1.022	1.055	0	0.02	0.06	0.04	0.04	0.06	0.1	0.04	0.03	0.08	0.932178	0.907559	0.64646	0.709395	0.680626	0.432363	0.0438273	0.0324456	0.0851911	0.326191	0.996674	0.998909	0.975418
FALSE	High	Master Protein	TGGT1_224060-t26_1-p1	transcript=TGGT1_224060-t26_1 | gene=TGGT1_224060 | organism=Toxoplasma_gondii_GT1 | gene_product=Putative thioredoxin [Source:UniProtKB/TrEMBL;Acc:A0A125YVC0] | transcript_product=putative thioredoxin | location=TGGT1_chrX:3262854-3264722(-) | protein_length=622 | sequence_SO=chromosome | SO=protein_coding_gene | is_pseudo=false	MAPRTSLALLALYALVSTSSHLLPDSFPPSFSSLSLSGVSAAPREAGVVNVEEASSSGAARSDKSTKSYSAQQRQQTRENQLKVLESGAMTLSGLGTYKEFIASHPFVLVMYYAPWCYWSKATLPEFHAAAKILAHHEPPVILALVDSVEEEEIANHEDIREFPTLKFFIDGRSQAYEGRRHRTHLVHWVDTRLDRDKSLTSKQHLDEVMSNRDHGHLVIVGAFSESGYDAKAYVSVARRFGEDVFFGHVQDPALVNHLREHIRRLLGGEKVAADIERRLVSPPFIAVFSKHAHEPDVHMYTGNPSDVSALTTFVSRFRFPLVSIFDADRLPENFFTDGRPKAVLIVDSKRNPAAVAAVESEVSTDPIVRAFLEGARKHRHSVLAAVCGVTSAFEKHML…	0	97.368	34	20	39	20	622	68.9	6.7	116.08	20	1.021	0.973	0.989	1.028	1.05	1	1.016	0.996	1.01	1.011	0.03	-0.04	-0.02	0.04	0.07	0	0.02	-0.01	0.01	0.02	0.631261	0.0599415	0.453285	0.307412	0.488596	0.982221	0.634373	0.936904	0.357251	0.838502	0.996674	0.989773	0.973444
FALSE	High	Master Protein	TGGT1_233120-t26_1-p1	transcript=TGGT1_233120-t26_1 | gene=TGGT1_233120 | organism=Toxoplasma_gondii_GT1 | gene_product=AP2 domain transcription factor AP2VIII-2 [Source:UniProtKB/TrEMBL;Acc:S7V332] | transcript_product=AP2 domain transcription factor AP2VIII-2 | location=TGGT1_chrVIII:2426324-2433835(-) | protein_length=2503 | sequence_SO=chromosome | SO=protein_coding_gene | is_pseudo=false	MEPSSPAAAPCASMKPERDSSPPRAVVKADPDCSVPAGSSPATFGAASPRRASLPTEPAAPAASSTSESSETVATPAGPAAEGAGPCGAPETAGAGHAQAGEGSTLLVARSTCLSILNALSLCCPEWKKKDNFRSFYFHFAQISQAADRAFLDVYLTIVFDKVIRSLPPQPCPPPMPLVVKALRELPQSDVDEITAELDALRLSSAAAAAQAAVTSGAGLGFEASSLSLTTLAEERPSQAPTAFSPKQKEEAGRLASPRRAAAPGDSQATLSTPRGRGGSRGGLGRGGSGGRSQRGASHAGAADETVSGLELDDPPEGAASANGPAGSGGATPQALRRLVGGISFNRSGNAWVASWVTRADFKHRYKYFKTADFGYEQARLLAIRFRQHKLLSGDAVVE…	0	97.213	13	26	30	26	2503	256.5	8.16	61.28	26	1	0.963	0.979	0.975	0.975	0.939	0.955	1.011	0.982	1.022	0	-0.05	-0.03	-0.04	-0.04	-0.09	-0.07	0.02	-0.03	0.03	0.995038	0.592045	0.178357	0.575372	0.72209	0.187027	0.323629	0.882753	0.617536	0.61793	0.999123	0.990049	0.971021
FALSE	High	Master Protein	TGGT1_259260-t26_1-p1	transcript=TGGT1_259260-t26_1 | gene=TGGT1_259260 | organism=Toxoplasma_gondii_GT1 | gene_product=AAA domain-containing protein [Source:UniProtKB/TrEMBL;Acc:A0A125YKJ7] | transcript_product=membrane protein FtsH1 | location=TGGT1_chrVIIb:2788863-2795704(-) | protein_length=1250 | sequence_SO=chromosome | SO=protein_coding_gene | is_pseudo=false	MSSRNGGSPARSRSSRRCSASRRAGRHRSDSGAGECRPGTDGRSLSTSSDFLNSSSSPGSYSDRVQQGIGDPEVFPVPFEANGPKFSSDRRSSTSPSLNRKATFTRVLAALDSADALRPIPPAPSTYTYARDPASDTFRVGTSLSSLVALAPPPVPPPFITPNMPTQSNRALPPPSGPTPDAAGSPPRSGSPTPRARGEQHRYHYDSGHVSSSHVSNESHSFQRIRSNPVLPEKTQGDAPTYPNQGEKAGGGRMRAAILILIGVCIGLAIWPMFVSFLTFRLLHSLHDGADGVDIDSTDYEGVDDDGIRPDGSYGNHMMHNTTDSSSGSNVTNSETALVPPQPTFPPLTFNDLAGLTEAKTELQEVVQFLRDPSKFERLGARLPKGVLLVGPPGTGKTA…	0	97.088	24	27	39	27	1250	136.9	7.11	90.75	27	1.013	0.981	0.995	1.013	1.026	0.995	1.008	0.991	0.983	0.994	0.02	-0.03	-0.01	0.02	0.04	-0.01	0.01	-0.01	-0.02	-0.01	0.825253	0.49523	0.921285	0.171868	0.638826	0.778158	0.871341	0.546316	0.748002	0.837846	0.996674	0.990049	0.992295
FALSE	High	Master Protein	TGGT1_258390-t26_1-p1	transcript=TGGT1_258390-t26_1 | gene=TGGT1_258390 | organism=Toxoplasma_gondii_GT1 | gene_product=J domain-containing protein [Source:UniProtKB/TrEMBL;Acc:S7W7H7] | transcript_product=putative DnaJ protein | location=TGGT1_chrVIIb:3406355-3407941(-) | protein_length=397 | sequence_SO=chromosome | SO=protein_coding_gene | is_pseudo=false	MGLLHLLKGLFPLCIAFGMLLETWRVPETANWSLFSLDMYPLMVLAAKQNLYSVLGVKRNASADEIKKAYRKLSMKYHPDKNKEPNAEAKFKEISFAYEILNNAEKRQVYDEYGEEGLERLQSGGQQASHPFGDIFSDFFGGGFGGRTRETPKAPPSTVRLNVSLEQLYKGETLDISFTRPVMCMHADECFTKKPDCKGPGLRVITQQMGPGFIVQNQIQDDTCVDQGKAWRPRCKECPNGITEPEVTQLSATVEAGMRDGDEIVFDGVGEHKLGHEPGDLVLVIQELPHKRYSRIGDDLEMSIRISLLEALVGFERSFIHLDNTPVRVKKDDVTFDGQTMTLYNKGMPKKGNTSQFGNLRIKFMVSYPAALDEKQKAAARQALEGTRYSQREVTAF	0	96.963	50	17	36	17	397	44.6	6.93	93.9	17	0.972	0.971	0.934	1.037	1.007	1.006	0.968	1	0.994	1.033	-0.04	-0.04	-0.1	0.05	0.01	0.01	-0.05	0	-0.01	0.05	0.0175822	0.330096	0.373699	0.483199	0.8711	0.775271	0.215346	0.989965	0.805438	0.413466	0.996674	0.989773	0.971021
FALSE	High	Master Protein	TGGT1_314780-t26_1-p1	transcript=TGGT1_314780-t26_1 | gene=TGGT1_314780 | organism=Toxoplasma_gondii_GT1 | gene_product=Myosin G [Source:UniProtKB/TrEMBL;Acc:A0A125YZG6] | transcript_product=myosin G | location=TGGT1_chrXI:4226752-4246422(-) | protein_length=2059 | sequence_SO=chromosome | SO=protein_coding_gene | is_pseudo=false	MTDRCWIPHPTEVWGIAVPAGAPGTCTYKLVEVTDDGTDPRKLEVTLAKSALTQVAPVTDPRSLEGVQNVCVLGDVSEASVLHTVRLRYQRDEIYTNVGHIVLALNPFKYLQLYGPDFVRTYFEDTHVFDLPPHLFQVSAAAVKGLSERGKPQSTLITGESGAGKTESTKLILQFLADVSELSSSSSSSFKVSSGARLVERAERNRSISQKDRGSCGTGGDNALQSGVGSGSQGREATSLQQRILEISPVLESFGNASTSRNPNSSRFGKWIEVYFGDKLKVLGASITSYLLELPRVTRHIAGERNYHVFYQLVHGLNTSDLVGVAETYRLGTDSLAFSYLTPQEQTVNTKSTKADTEVSSPAPDIDDLTGFSELKRALLVLGFSPSTQNSIFSIVAAI…	0	96.926	17	30	41	30	2059	227.2	6.37	87.49	30	0.993	1.079	0.99	0.993	0.986	1.071	0.982	1.016	1.021	1.052	-0.01	0.11	-0.02	-0.01	-0.02	0.1	-0.03	0.02	0.03	0.07	0.918317	0.564072	0.898006	0.874121	0.535347	0.437337	0.638552	0.614963	0.724036	0.180051	0.996674	0.990049	0.991016
FALSE	High	Master Protein	TGGT1_240600-t26_1-p1	transcript=TGGT1_240600-t26_1 | gene=TGGT1_240600 | organism=Toxoplasma_gondii_GT1 | gene_product=Putative chaperonin cpn60 [Source:UniProtKB/TrEMBL;Acc:S7W6R0] | transcript_product=putative chaperonin cpn60 | location=TGGT1_chrVI:1306402-1309981(+) | protein_length=667 | sequence_SO=chromosome | SO=protein_coding_gene | is_pseudo=false	MLLEPEVGMMVALASFVPYPLILVGFGISSFASCFQLPAPNAFLGHSLLRSPSSEGSHPVSPATVRGKHVPLVINDNYRAPSTRQGSPSTLMARKAKRLILADECRNQLLEGIEAVAGAVRVTLGPRGRNVLLEKEYGPPMIVNDGVTIARNIELKSRAHNAGAKLVQEVASTSDEWAGDGTSSTTILTAEIARQGVDHVNKGHNPIPLQRGIQRAAKVMMEEVKRLAKPVDGMNDLLNIATVATSGNVAMGQVIAKSFDKLGRHAAIVLEDNPALEDTLEFTEGYTFERGYSSPYFLVGEDRDIIEWQSPSILVCDYKIETAQSILPILEHFVRTKAPLVLIAEDFGPEVLQTCIINRMRQLLKVVTIRAPSFGERRKEYLRDIAVATNAQLISRDLG…	0	96.86	36	20	53	20	667	72.2	5.68	148.14	20	0.971	0.967	0.977	1.042	1.012	1.008	1.018	1.026	1.036	1.025	-0.04	-0.05	-0.03	0.06	0.02	0.01	0.03	0.04	0.05	0.03	0.37398	0.185568	0.309788	0.356304	0.831961	0.863627	0.411769	0.708674	0.606935	0.670451	0.996674	0.989773	0.971021
FALSE	High	Master Protein	TGGT1_239752-t26_1-p1	transcript=TGGT1_239752-t26_1 | gene=TGGT1_239752 | organism=Toxoplasma_gondii_GT1 | gene_product=hypothetical protein | transcript_product=hypothetical protein | location=TGGT1_chrVI:884973-888129(+) | protein_length=905 | sequence_SO=chromosome | SO=protein_coding_gene | is_pseudo=false	MGSCQADCQFPTWHPRMKSMRFRNAAPPKVCLLVFLLASTVFVAFGSCETSNGDSVEVQKCATLNRVAEPLPFLQKKTLFLIANEPVLESHVVSNLLHQLLYTLQVPNSHVQLLDEVLLSEHGKTSHATVLPWLLNVYRELPAGIEFVWLGTAYSRIVGPSLEKLMALLVSEAQEMNPRSREWYPLGLCAGYGLKDPVLSRTHHFYQDDAFVYPFLDAGLLMDRKFLRFLDQTVKEEGTKLPPRIEIDPIHELFKFLYQTRGFLMQHSNMFCPSSPISRDFDRAEVLYPPKHKRPTNGATPRAQGNDDASDAGGEYKGGAAKGMLGSRRSPALSTAEKKHIQGCVSFGVGCRHSPILSHQFFDRMMEFEHDIMERKEALAEQYPIGADVSDDHPEFREK…	0	96.714	26	20	45	20	905	102.1	6.37	109.81	20	0.991	1.019	0.986	1.016	1.007	1.035	1.001	1.04	1.01	1.039	-0.01	0.03	-0.02	0.02	0.01	0.05	0	0.06	0.01	0.06	0.637124	0.32974	0.729307	0.758033	0.833935	0.433285	0.911485	0.626522	0.815889	0.321423	0.996674	0.989773	0.980327
FALSE	High	Master Protein	TGGT1_235160-t26_1-p1	transcript=TGGT1_235160-t26_1 | gene=TGGT1_235160 | organism=Toxoplasma_gondii_GT1 | gene_product=hypothetical protein | transcript_product=hypothetical protein | location=TGGT1_chrX:4553113-4566152(-) | protein_length=1545 | sequence_SO=chromosome | SO=protein_coding_gene | is_pseudo=false	MSQDSSLNSMAGGAMFTGAVSAFPSHASSPRPVQTVADFERIATAALSVDANERSQAEALLLQFQQHSVESLDFCLAVLEQSRDPATLSVAVIVLRNGAIAQWGRRQLAYEASVKANSGSGDTLRNDELRAPLLEFESKVVFLIQGMLRLLQAHAVLQDTNSVQATDYRVCDRQMTYALAVLLKKALASGTRETRDALLQMLLNLLEEMRTLLIPAGTVPASQRPHLQEGASILEAVETGKPSPHVSNFVLCLSVLMSVSREVGSSDLSLLQLTTQQHIDCKKQFEREILLPLVDLDLSLLNLLLKKCSSLDAQAFAPPEARKQRDSLLASVVGILELLMDWNFGQVLLRFVTTSDVSFAPTAEWLPVFFPSSASPSPGFRLESLVFPPGPEQERPNLF…	0	96.596	16	19	35	19	1545	168	6.28	97.96	19	0.972	1.029	0.988	1.006	0.978	1.035	0.994	0.983	1	1.005	-0.04	0.04	-0.02	0.01	-0.03	0.05	-0.01	-0.02	0	0.01	0.674715	0.480623	0.0774383	0.926295	0.0716364	0.414555	0.921818	0.7205	0.981563	0.930378	0.996674	0.990049	0.971021
FALSE	High	Master Protein	TGGT1_295110-t26_1-p1	transcript=TGGT1_295110-t26_1 | gene=TGGT1_295110 | organism=Toxoplasma_gondii_GT1 | gene_product=Protein kinase domain-containing protein [Source:UniProtKB/TrEMBL;Acc:A0A125YJ16] | transcript_product=rhoptry protein ROP7 | location=AAQM03000462:293-2020(-) | protein_length=575 | sequence_SO=contig | SO=protein_coding_gene | is_pseudo=false	MGHPTSFGQPSCLVWLAAAFLVLGLCLVQQGAGIQRPHQWKSSEAALSVSPAGDIVDKYSHDSTEGENTVSEGEAEGSRGGSWLEQEGVELRPPLLDSQTGTSTASPTGFRRFLRHLRFWRRGSTRGSDDAAEVSRRTRVPLHTRLLQHLRRVGRFFRHGIPAAAGRFFRRVWPERPQPVFTEGDPPDLETNSLYYRDKVPGEVIIREVLGKVAGFGPTSGHGVFAAYENAFSEMLWAEGGAVTVISELGRPGRQLVRGNLINIVDGGLLFQATDQATGEPMTVLVGSTWNKPSGKDLDKLRHQALAIGLFQKVKNPYLANRYLRFLAPFDLVTIPGKPLVQKAKSHNEVGWVINLLLLLPAIEIDMGRFVEELYELPTEDRPLADAARLYLTVQAVRL…	0	96.301	30	13	58	8	575	63.4	7.01	177.02	13	1.001	1.005	0.968	1.01	1.011	1.015	0.977	1.003	1.003	1.01	0	0.01	-0.05	0.01	0.02	0.02	-0.03	0	0	0.01	0.796313	0.918048	0.207591	0.674248	0.554294	0.604164	0.569564	0.349219	0.133158	0.747417	0.996674	0.998909	0.971021
FALSE	High	Master Protein	TGGT1_288830-t26_1-p1	transcript=TGGT1_288830-t26_1 | gene=TGGT1_288830 | organism=Toxoplasma_gondii_GT1 | gene_product=Pyr_redox_2 domain-containing protein [Source:UniProtKB/TrEMBL;Acc:A0A125YU79] | transcript_product=NADH dehydrogenase (NDH2-II) | location=TGGT1_chrIX:2563874-2571485(+) | protein_length=657 | sequence_SO=chromosome | SO=protein_coding_gene | is_pseudo=false	MAMLFSSSAAGSLPSRRSRSVAAKLAPFASPIFSSPLLKQGSDTAFGLRSPTPGLSVHPRFASRGPLTRSEEAGKAPFGFSTARGEQTATETNAPRFGTSLCSSFPLSATQKSHGSREKGLTNERAFSTFSFQGFMKNVKSRNAKPYTGPPQKVVVLGTGWASVNFFRHLDPNIYDVTVISPRNYFTFTPLLPSVCAGTLSPLSCIEPVRSLTYRNGRKVADFYEAHCTDVDFKNRIVACDSRQGGHFKVKYDYLVIAVGSESNTFGIKDVAANAFFLKEVEHAMAIRKKVMNNFELAALPQTSEKERDRLLHFVVVGGGPTGVESAAEFADFIKEDMSKYFPQLIPHVSISLIEGGSRLLGTYPPDISAFAEKTLTEELHVKLLLRSTVVGVDATSVR…	0	96.107	36	19	39	19	657	72.1	9.01	92.45	19	1.008	0.995	1	0.974	0.981	0.969	0.974	0.95	0.986	0.999	0.01	-0.01	0	-0.04	-0.03	-0.05	-0.04	-0.07	-0.02	0	0.796655	0.877786	0.997723	0.551669	0.253935	0.106424	0.656584	0.355294	0.819702	0.986017	0.996674	0.998909	0.999286
FALSE	High	Master Protein	TGGT1_321450-t26_1-p1	transcript=TGGT1_321450-t26_1 | gene=TGGT1_321450 | organism=Toxoplasma_gondii_GT1 | gene_product=SANT domain-containing protein [Source:UniProtKB/TrEMBL;Acc:S7VRY8] | transcript_product=Myb family DNA-binding domain-containing protein | location=TGGT1_chrIb:1792947-1808537(+) | protein_length=4220 | sequence_SO=chromosome | SO=protein_coding_gene | is_pseudo=false	MAEPSSEDASASPESHLPSSSELHVGLEQNDVSHLPADPPAESEARPSADVPSAAVGGAPPLSTSSSFESSASSLPGAFLSRSVSSDLYDASFTVEEEDDDLLRKMHFALQDDEDSASTENAATCVSSSMGLLMDPSLGGPSSLSGASSSVSTEFFTASFASSSSSVAVSGLAPSAPSSSPPLSSQRQSPRDGNAFPLDGSEEGASPSDSGTQAGSSPAAPAPNSSGGTTPLGGGLRAGRSIGSAFAEDSSVSTAAPGGGPRLDRLGFAGSGDPLFPSLPAASSPPTQKDAERTENIVGMGLAALHKALAKKAQEAAAKAREEGSETGVSALPTRNEDFKIASLSACFLKTEDNQPNIDEAHSASVNSATDTKTKVPADAAEEPETSAKGDARREREET…	0	95.463	8	28	33	28	4220	436.3	5.21	63.26	28	1.007	0.983	0.94	1.06	1.068	1.042	0.997	1.065	1.02	1.022	0.01	-0.02	-0.09	0.08	0.09	0.06	0	0.09	0.03	0.03	0.846847	0.801968	0.327876	0.28469	0.454162	0.699608	0.733968	0.415134	0.820025	0.578163	0.996674	0.995152	0.971021
FALSE	High	Master Protein	TGGT1_209600-t26_1-p1	transcript=TGGT1_209600-t26_1 | gene=TGGT1_209600 | organism=Toxoplasma_gondii_GT1 | gene_product=hypothetical protein | transcript_product=hypothetical protein | location=TGGT1_chrIb:1372263-1374087(-) | protein_length=451 | sequence_SO=chromosome | SO=protein_coding_gene | is_pseudo=false	MLSVDGVHFARRNCVVVVVTCPDTSVDFISGVPVSATGFASSVQPPQQVFSEFRDVSSDLRFAVATTMAKNTLETGDSLRLLSFDELFKSSEVKTIQKFQGFKRQNTLKGDTRAKNELLSVLRQQRVLVDDNAIHFIAEARSESKADARNSVFKLAQKYKVLPDTENVKKIKQLFGKVMEDDSGDEDWEPSFRRLPDCLKTKRALKFMEDDVSHDILLGEIGTIEDESSNLGGDVVTLETVKEEPEEVMGRVIDTQAGELGLSLGGAEGTSHAKEAQESSDDEDEDDAHFDGEDLKVLNDMQKEFIGNNLTAWLKDIRKAYETGVKLVKVNALGYKFIRIVTLKEMVLSIRQPHTHSKVKVERQAVITEIVAVKLGRDSKEFRALDQLVDEGKEAADTN…	0	95.334	43	18	42	18	451	50.2	5.3	113.2	18	0.968	0.958	0.951	1.037	1.003	0.993	0.986	0.984	0.974	1.02	-0.05	-0.06	-0.07	0.05	0	-0.01	-0.02	-0.02	-0.04	0.03	0.0823387	0.372487	0.0687211	0.133494	0.508151	0.874504	0.0982956	0.655459	0.631334	0.151688	0.996674	0.990049	0.971021
FALSE	High	Master Protein	TGGT1_212300-t26_1-p1	transcript=TGGT1_212300-t26_1 | gene=TGGT1_212300 | organism=Toxoplasma_gondii_GT1 | gene_product=hypothetical protein | transcript_product=hypothetical protein | location=TGGT1_chrX:3837742-3842895(+) | protein_length=683 | sequence_SO=chromosome | SO=protein_coding_gene | is_pseudo=false	MSAQGQQGVRSTVAAGKNRFWQPAPITVLLVLSSSFLFAFAANTPQNSSTTGQSTPSDDHGVSTEHFHDAVTVDAAEHAGEDEMTACSPEAARVIEARVATLKAETEAAVAEVRRTEAMQRELFGRLNAKVRAMNDRLDELSDAQKSLAKRLETTGQLLIADREEQAKRFTTDVETYIIESGLKKAVFQQREIAAKLQTLAESNQKSKQALDALLQHVDDEKEQTKQWISTVVRDLEKYVEARTQTTLESLQRDAQEHANFMQQQLNDMKLDHLLLLQAVSSAETQLNERGIAGVDISQLDESASFERMMTTFEKVLKEQLKGKFVLPIFVVTQCPDSMERVAFMNTYLVPSKRNFRAVFQALGHTPQASAVVIRIESVMVEAWMEVNGKVTGMQYLTP…	0	95.324	34	18	29	18	683	75.6	6.51	81.91	18	1.038	1.016	1.064	0.934	0.969	0.948	0.993	0.992	0.877	0.908	0.05	0.02	0.09	-0.1	-0.05	-0.08	-0.01	-0.01	-0.19	-0.14	0.157397	0.488434	0.449459	0.309723	0.452082	0.241915	0.76068	0.880358	0.31729	0.159412	0.996674	0.990049	0.973444
FALSE	High	Master Protein	TGGT1_283850-t26_1-p1	transcript=TGGT1_283850-t26_1 | gene=TGGT1_283850 | organism=Toxoplasma_gondii_GT1 | gene_product=Peptidylprolyl isomerase [Source:UniProtKB/TrEMBL;Acc:S7UMS7] | transcript_product=peptidyl-prolyl cis-trans isomerase | location=TGGT1_chrV:2748825-2756049(-) | protein_length=503 | sequence_SO=chromosome | SO=protein_coding_gene | is_pseudo=false	MGGTCEEASSHAHSHSCCGGGSDKVDVDPASIVDAGEEISSGDKGVFKKILKEGDGPQPQPGEEVVVHYTGTLLDGTKFDSSRDRDSPFKFIIGEGQVIRGWDLGVMKMKRGERAMLTIQPDYGYGASGSPPVIPPNSVLKFDVELLDSHPKPKDKWEMNVGEKLEGANAEKERGNEAFKKGGYAEAAAAYREGLDFFSFSENWTDEEREQQKRLELPLRLNLATCCNRLGEFSEAIEQTTKALEMDPESSKGWYRRGVARMAVGQLDEARHDFVQAAKLDPKNVEIRRELEKCKKKIEEVRAKEKSAFGNIFKKVDLYTEKQGVRNVSKCPKVYMDIKVGDNAPKRVVFALYNDTVPKTAENFRALCTGEKGEGKKGKPLCFKNSLFHRVIPGFMMQG…	0	95.025	46	21	52	20	503	55.5	5.59	127.96	21	1.006	0.985	1.014	1.015	1.021	1	1.03	1.012	0.971	1.011	0.01	-0.02	0.02	0.02	0.03	0	0.04	0.02	-0.04	0.02	0.295251	0.602268	0.121845	0.352518	0.191808	0.999609	0.249497	0.438723	0.309679	0.38089	0.996674	0.990049	0.971021
FALSE	High	Master Protein	P02545	Prelamin-A/C OS=Homo sapiens (Human) OX=9606 GN=LMNA PE=1 SV=1	METPSQRRATRSGAQASSTPLSPTRITRLQEKEDLQELNDRLAVYIDRVRSLETENAGLRLRITESEEVVSREVSGIKAAYEAELGDARKTLDSVAKERARLQLELSKVREEFKELKARNTKKEGDLIAAQARLKDLEALLNSKEAALSTALSEKRTLEGELHDLRGQVAKLEAALGEAKKQLQDEMLRRVDAENRLQTMKEELDFQKNIYSEELRETKRRHETRLVEIDNGKQREFESRLADALQELRAQHEDQVEQYKKELEKTYSAKLDNARQSAERNSNLVGAAHEELQQSRIRIDSLSAQLSQLQKQLAAKEAKLRDLEDSLARERDTSRRLLAEKEREMAEMRARMQQQLDEYQELLDIKLALDMEIHAYRKLLEGEEERLRLSPSPTSQRSR…	0	94.812	32	23	45	22	664	74.1	7.02	101.66	23	1.02	1.023	1.027	1.074	1.096	1.1	1.103	1.041	1.093	1.087	0.03	0.03	0.04	0.1	0.13	0.14	0.14	0.06	0.13	0.12	0.424188	0.669879	0.0896184	0.428584	0.427634	0.509695	0.317076	0.638857	0.384606	0.330966	0.996674	0.992529	0.971021
FALSE	High	Master Protein	TGGT1_269690-t26_1-p1	transcript=TGGT1_269690-t26_1 | gene=TGGT1_269690 | organism=Toxoplasma_gondii_GT1 | gene_product=hypothetical protein | transcript_product=hypothetical protein | location=TGGT1_chrVIII:5679281-5681878(+) | protein_length=865 | sequence_SO=chromosome | SO=protein_coding_gene | is_pseudo=false	MRPLRVTVALFWAMVAVVGFWASPDSRLTVRGPQFADAATRGVVKSLKRAMNQGWRNGAHSICAILGCDYEHVKAHLTHKPTFFHSFKAVCAQLDEFEEEVTHAKMREEDLTPSQREYRWLLLSKGAALINDALGTQFEVPASYVPHNAKNRHYIPGQRGEGDDKEKLKTRMRGLQVVVPLPTLEEIQKDGMDRLAAVREKHMAQIKELEDARHRKFLLLQEEHDRQTDQLVSELRLKHTEEMDTIRRELAEERRLFEQSVKVWDAVSRLLTDAHVGIETLTDRVHTMSQHVFKLNVFYEKLHSFQQTAKENPTGAAPYSALSYAFQSEAAVDQAMHQIVAIYQEASAGVARVQEILNQADGVMATAPTRDDAAWFQQRQRGYKDRLESFVNLLSDLSV…	0	94.745	27	23	38	23	865	94.2	7.2	88.63	23	0.965	0.977	0.989	1.062	1.025	1.038	1.05	1.026	1.017	0.998	-0.05	-0.03	-0.02	0.09	0.04	0.05	0.07	0.04	0.02	0	0.174483	0.22876	0.520142	0.617076	0.803856	0.719145	0.634461	0.428259	0.802373	0.968802	0.996674	0.989773	0.973444
FALSE	High	Master Protein	TGGT1_411430-t26_1-p1	transcript=TGGT1_411430-t26_1 | gene=TGGT1_411430 | organism=Toxoplasma_gondii_GT1 | gene_product=Protein kinase domain-containing protein [Source:UniProtKB/TrEMBL;Acc:S7UG16] | transcript_product=rhoptry protein ROP5 | location=AAQM03000489:189-1624(+) | protein_length=461 | sequence_SO=contig | SO=protein_coding_gene | is_pseudo=false	MSGGRVPRVPASSTTTSASEGIFRRLVRRLRRGRGTADGAGVADETHQEPRPPLRKRLAQHFRRLRGFFGRLTPRWLSGLGRRAQRWWRGRQRPLLDPSFHGLEAGDSFMRDLLKREKELIGYCREEALKEPAAMVEAVTATVWPQNAETTVDSLLSQGERKLKLVQPLRVGDRSVVFLVRDVERLEYFALKVFTMGAENSRSELERLHEATFAAARLLGESPEEARDRRRLLLPSDVVAVQSQPPFAQLSPGQSDYAVANYLLLMPAASGGEGILARHILTAQLIRLAANLQSKGLVHGRFTPDNLFLMPYGPVMLGDVSALWKVGTRGPASSVPVTYAPREFLNANTATFTHALNAWQLGLSIYRVWCLFLPFGLVTPGIKGSWKRPSLLVPGTDSL…	0	94.507	33	12	76	4	461	51.5	10.56	212.89	12	1.048	1.069	0.998	0.889	0.931	0.95	0.887	0.912	0.848	0.911	0.07	0.1	0	-0.17	-0.1	-0.07	-0.17	-0.13	-0.24	-0.13	0.292356	0.163182	0.94161	0.248705	0.218573	0.577891	0.122625	0.32723	0.0121704	0.3221	0.996674	0.989773	0.992295
FALSE	High	Master Protein	P07355	Annexin A2 OS=Homo sapiens (Human) OX=9606 GN=ANXA2 PE=1 SV=2	MSTVHEILCKLSLEGDHSTPPSAYGSVKAYTNFDAERDALNIETAIKTKGVDEVTIVNILTNRSNAQRQDIAFAYQRRTKKELASALKSALSGHLETVILGLLKTPAQYDASELKASMKGLGTDEDSLIEIICSRTNQELQEINRVYKEMYKTDLEKDIISDTSGDFRKLMVALAKGRRAEDGSVIDYELIDQDARDLYDAGVKRKGTDVPKWISIMTERSVPHLQKVFDRYKSYSPYDMLESIRKEVKGDLENAFLNLVQCIQNKPLYFADRLYDSMKGKGTRDKVLIRIMVSRSEVDMLKIRSEFKRKYGKSLYYYIQQDTKGDYQKALLYLCGGDD	0	93.948	44	16	57	16	339	38.6	7.75	136.87	16	1.02	1.016	1.014	1.01	1.03	1.026	1.024	1.057	1.039	1.052	0.03	0.02	0.02	0.01	0.04	0.04	0.03	0.08	0.06	0.07	0.491741	0.306834	0.343964	0.826896	0.287569	0.500377	0.527039	0.469614	0.452537	0.489331	0.996674	0.989773	0.971021
FALSE	High	Master Protein	TGGT1_280490-t26_1-p1	transcript=TGGT1_280490-t26_1 | gene=TGGT1_280490 | organism=Toxoplasma_gondii_GT1 | gene_product=U-box domain-containing protein [Source:UniProtKB/TrEMBL;Acc:S7UUM0] | transcript_product=U-box domain-containing protein | location=TGGT1_chrVIIa:332194-348045(-) | protein_length=1089 | sequence_SO=chromosome | SO=protein_coding_gene | is_pseudo=false	MQDSPQSSAAACGAAATIGPAKEDHFLQLVLRLTVDATTASTPHCQLYYLKRYAEELTREGKPLKLARADLETILIKRIQDAAKEGTPNVFRFLADCFHRANDEVYSKGLPAALRPGVVQELQRQLVDYSVLLLSCPELFELGDPPPYAMLGEQLTQFVEMGCPLSFFARMVDTLVQQGTETGEDFLGRWFTPTIKSLSERLNLHSMTEYKSAPLNALKFLSSQKAVARLMADPAILLPEFPRRFPVTKPGLFYQENSLLGRLLAQTLLDGPTLKNGRQESLSMKYFAGNQALTTQYLQATVQTLRHDEQNHQEVFLQIVKNLCRGGSDCRHRVVQWYGQILGSNELRAKMSHMLRMTQQQAAESLDPMHSMLLKVQGQTSYGFTLNAFWSLLGLAEPI…	0	92.872	21	21	40	21	1089	121.9	6.2	89.94	21	1.038	0.991	1.015	1.005	1.043	0.996	1.02	1.012	1.022	1.042	0.05	-0.01	0.02	0.01	0.06	-0.01	0.03	0.02	0.03	0.06	0.64487	0.894809	0.831669	0.630829	0.643271	0.958872	0.804417	0.756907	0.756873	0.576201	0.996674	0.998909	0.984106
FALSE	High	Master Protein	TGGT1_309250-t26_1-p1	transcript=TGGT1_309250-t26_1 | gene=TGGT1_309250 | organism=Toxoplasma_gondii_GT1 | gene_product=hypothetical protein | transcript_product=hypothetical protein | location=TGGT1_chrXI:547054-561278(-) | protein_length=3801 | sequence_SO=chromosome | SO=protein_coding_gene | is_pseudo=false	MRRLSISAGTPSTKGGGKACVVSASDVPPSLSRASESHLPRPREEPAQAIPAALPFSPASSLPASPGSGGSGVCTPDSRGQAGAAGGPQGGRRGRKSVQTVKAGQSPAPLVAGSPRGDRLPCQKEEGSVSEQKDLPSVSRCSASPAGPPSVGAEAPLSSLSRSRRPSVADARSPLLAASAAVPSATSALRPSRAETVSLTGASPPPAVVEPQPAGDGIAEKASSSRTGSSEEDQDAPGVFSQRASRSKEDGRDVALLGGQDERREELREERGRGRRQGSVAESRLQAPASKTEREGKKAEADKKEETGKSTGRQRLPPSRCRHRVEEPRWDEEDESELSEYAGFASGVNAGFPGAEKLEKECVRSREEKRRRRDEKGNETGSPQPERGGEEDARGAMRH…	0	92.67	10	28	32	28	3801	407.2	6.18	65.73	28	0.985	1.011	0.924	1.083	1.066	1.094	1	1.08	1.1	1.031	-0.02	0.02	-0.11	0.11	0.09	0.13	0	0.11	0.14	0.04	0.694834	0.877299	0.468433	0.507401	0.432764	0.188591	0.975501	0.433754	0.511938	0.28136	0.996674	0.998909	0.973444
FALSE	High	Master Protein	TGGT1_292920-t26_1-p1	transcript=TGGT1_292920-t26_1 | gene=TGGT1_292920 | organism=Toxoplasma_gondii_GT1 | gene_product=Putative heat shock protein 75 [Source:UniProtKB/TrEMBL;Acc:A0A125YFW1] | transcript_product=putative heat shock protein 75 | location=TGGT1_chrIa:3979-11415(+) | protein_length=861 | sequence_SO=chromosome | SO=protein_coding_gene | is_pseudo=false	MSLPSVGHPLSRLATTRLPGKSAVSLGPVIKEGSGKSSRRIVSSSCIQKNGEAETMPNPSRLGDSGNVRTPVMPPTASPIFSFHQAEASLPYSSAFPPVSTIHPACFIRWKRTNAGLFDNFGRGLATATFSGENGSESGGKSDATSATTNDGVADSEGEVHTFKAETKKLLHIVTHSLYTDKEVFVRELISNAADALEKLRFLQATAQVTDADGSEAMALEIHLSTDAAAKTFTLQDTGVGMTKAELLEHLGTIAKSGSLEFLMKHQGEKNADIIGQFGVGFYSAFVVSDRVDVYTRAHEEGAKAYLWSSDGAGEFNVKELSEEEASEAGLKRGTKIVCHLKKDCLEFSNIHHVKECATKFSSFVNFPIYVKEEDGKNTKITSQQALWLQTSATEDEHR…	0	92.371	29	21	43	21	861	95.1	6.13	118.83	21	0.989	0.984	0.951	1.017	1.006	1	0.967	0.984	0.997	1.012	-0.02	-0.02	-0.07	0.02	0.01	0	-0.05	-0.02	0	0.02	0.293015	0.151633	0.0962005	0.416511	0.582246	0.98205	0.349549	0.621001	0.863407	0.408951	0.996674	0.989773	0.971021
FALSE	High	Master Protein	TGGT1_243460-t26_1-p1	transcript=TGGT1_243460-t26_1 | gene=TGGT1_243460 | organism=Toxoplasma_gondii_GT1 | gene_product=hypothetical protein | transcript_product=hypothetical protein | location=TGGT1_chrVI:2564580-2571836(-) | protein_length=2011 | sequence_SO=chromosome | SO=protein_coding_gene | is_pseudo=false	MFVCVEAPQYSSATACVCTQFRFRESRPGRGKMTDPLSSEPKELLESAAAASSLLSSSPLSLSRALPAPHSLSVAMEAPSSASMAPPALSADGRGDKTSLVSMSPTAASLASPKSNSVFLSLQVSSTSSASTAVPQDECDSAASREDGSPRTPWALDASGATPKSVSKGFGPEDLLQASSGETASPVRRARGGRREGLGPEGDEAKKSISPRHSEETERKASAEDESFEALVSTKKMEDCASLGGRVSDSEDPESPCTKELNGNTGPSARAERSSRKAALRRIRQFAGVSGKDAATFGSVSSPGDAASATTLEIESLGQDFRSAAERDFLAVKDEENPRRKRVRTEVVPGGSEPASPTALEEGDAKAFRQTLLGRDAEAQKPGDDPLSSVLADAFLADR…	0	92.331	17	28	47	28	2011	209.8	5.07	86.87	28	1.012	0.994	0.992	1.059	1.072	1.053	1.05	1.062	0.993	1.019	0.02	-0.01	-0.01	0.08	0.1	0.07	0.07	0.09	-0.01	0.03	0.597817	0.23998	0.617501	0.261939	0.0771833	0.309859	0.414315	0.275289	0.13656	0.0416169	0.996674	0.989773	0.975418
FALSE	High	Master Protein	TGGT1_250710-t26_1-p1	transcript=TGGT1_250710-t26_1 | gene=TGGT1_250710 | organism=Toxoplasma_gondii_GT1 | gene_product=Microneme protein MIC10 [Source:UniProtKB/TrEMBL;Acc:A0A125YLT8] | transcript_product=microneme protein MIC10 | location=TGGT1_chrXII:5071359-5071955(+) | protein_length=198 | sequence_SO=chromosome | SO=protein_coding_gene | is_pseudo=false	MALSSLNNIRPFSGLLGCGLLFGALVVVVACVFSVPVEAGVLRKVAGAGSLQASIGEHDFFNDYDQDEEYRKRQQELQNQSPEEVEEAKRKYHEELRRKAEEDAETKRKQEAVIQELKEVAKKRGLREAAEREEKRIDEQQANYEQRQQELRDMDSAMEERLMQQRKKDQEERELARKNSDKVMEELKEKLARRRKSM	0	92.313	43	12	55	12	198	23.1	5.87	167.01	12	0.999	1.028	0.994	1.056	1.054	1.085	1.049	0.966	0.992	0.971	0	0.04	-0.01	0.08	0.08	0.12	0.07	-0.05	-0.01	-0.04	0.969672	0.42174	0.514243	0.738109	0.683522	0.57162	0.752768	0.238804	0.660933	0.350373	0.999123	0.990049	0.973444
FALSE	High	Master Protein	TGGT1_232350-t26_1-p1	transcript=TGGT1_232350-t26_1 | gene=TGGT1_232350 | organism=Toxoplasma_gondii_GT1 | gene_product=Lactate dehydrogenase LDH1 [Source:UniProtKB/TrEMBL;Acc:A0A125YWC8] | transcript_product=lactate dehydrogenase LDH1 | location=TGGT1_chrVIII:2023599-2025126(+) | protein_length=329 | sequence_SO=chromosome | SO=protein_coding_gene | is_pseudo=false	MAPALVQRRKKVAMIGSGMIGGTMGYLCALRELADVVLYDVVKGMPEGKALDLSHVTSVVDTNVSVRAEYSYEAALTGADCVIVTAGLTKVPGKPDSEWSRNDLLPFNSKIIREIGQNIKKYCPKTFIIVVTNPLDCMVKVMCEASGVPTNMICGMACMLDSGRFRRYVADALSVSPRDVQATVIGTHGDCMVPLVRYITVNGYPIQKFIKDGVVTEKQLEEIAEHTKVSGGEIVRFLGQGSAYYAPAASAVAMATSFLNDEKRVIPCSVYCNGEYGLKDMFIGLPAVIGGAGIERVIELELNEEEKKQFQKSVDDVMALNKAVAALQA	0	92.06	47	14	113	14	329	35.5	6.38	248.86	14	1.021	1.002	1.023	0.986	1.006	0.988	1.009	0.992	0.973	1.001	0.03	0	0.03	-0.02	0.01	-0.02	0.01	-0.01	-0.04	0	0.511574	0.930297	0.437715	0.237761	0.766164	0.479625	0.632062	0.711862	0.31692	0.963559	0.996674	0.998909	0.973444
FALSE	High	Master Protein	TGGT1_280540-t26_1-p1	transcript=TGGT1_280540-t26_1 | gene=TGGT1_280540 | organism=Toxoplasma_gondii_GT1 | gene_product=HEAT repeat-containing protein [Source:UniProtKB/TrEMBL;Acc:S7W9G6] | transcript_product=HEAT repeat-containing protein | location=TGGT1_chrVIIa:291701-308826(-) | protein_length=3381 | sequence_SO=chromosome | SO=protein_coding_gene | is_pseudo=false	MSAAPASSASGEAPNAASGIAEMEKKKKEYENTLLRLTLCNDDRLPAVLDKLLPIAFREMASCPAQLLPKVIEIVNHCLHRLRGTSSMRLPLSGLVDTWLEAQRRQTPGPNATVMKNVLLLFLSLAVARASVEEKLKAAEALLVGLPLFFPHTYAAAFVLFCECICNAETLSSLKEKAKALAANKEVKGVTFECLSKILAGAASSSSSKTPPATQAFVHASVEFLLLPPSLPQTLASLPSSSPPASATVSAACARVSGVSSDAAEAWMQRLRGKSREEMLSLQTHLVRFMIEVTRFAPLHVVEQQRQEAQRQEAQQREEAEATLGEWAKSGVSPGQLGAQPPACAVPAIMLAPLLVASCLPFDVLASPAETAIARLGVSVDRGDSVLLFFLFNLISSQP…	0	92.052	9	27	32	27	3381	365	6.02	63.36	27	0.952	1.008	0.949	1.039	0.99	1.047	0.986	1.001	1.101	1.061	-0.07	0.01	-0.08	0.06	-0.01	0.07	-0.02	0	0.14	0.08	0.476528	0.906197	0.28548	0.245028	0.789364	0.423892	0.386174	0.978484	0.183695	0.437483	0.996674	0.998909	0.971021
FALSE	High	Master Protein	TGGT1_289650-t26_1-p1	transcript=TGGT1_289650-t26_1 | gene=TGGT1_289650 | organism=Toxoplasma_gondii_GT1 | gene_product=PEP-carboxykinase I [Source:UniProtKB/TrEMBL;Acc:A0A125YIU7] | transcript_product=PEP-carboxykinase I | location=TGGT1_chrIX:3173228-3176423(+) | protein_length=677 | sequence_SO=chromosome | SO=protein_coding_gene | is_pseudo=false	MNYTMHLSRNVLREVYRFLPGRGFLPAQGSTASRVRHSLADKEFPCCSRSETCGLHIAEVRHTFFRQLRGSSGVNRKSSDAQRQFVVQFSRSVRKMNRTQSSGSLKDSISFLEMLKKQIDANLQHHKPGDCPLTKKDILDLGQLQKEIDFQENVQAVGITCAQLFHNTAPSVLYEQALKKEAGSLIASSGALCVSSGLKTGRSPADKRIVEEPSSRDDVWWGKVNIPFCEKSYLVNRERAVDYLNLQDQLYIVDAFAGWDPEYRIKIRVITTRAYHALFMQNMLVMPTAEELENFRPDFTIYNAGCFPANRFTNGVTSQTSVAMNLGAGEMVILGTQYAGEMKKGILTLMMYLMPKRGQLPLHSSCNVGPKGDVTLFFGLSGTGKTTLSADPSRQLIGD…	0	92	26	16	52	16	677	75.3	8.15	127.34	16	0.996	0.968	1.027	0.996	0.992	0.964	1.023	0.991	1.012	0.994	-0.01	-0.05	0.04	-0.01	-0.01	-0.05	0.03	-0.01	0.02	-0.01	0.64355	0.355679	0.0137015	0.53696	0.599374	0.265854	0.131519	0.776188	0.843119	0.437303	0.996674	0.990049	0.971021
FALSE	High	Master Protein	TGGT1_298020-t26_1-p1	transcript=TGGT1_298020-t26_1 | gene=TGGT1_298020 | organism=Toxoplasma_gondii_GT1 | gene_product=DEAD-family helicase [Source:UniProtKB/TrEMBL;Acc:S7VTJ1] | transcript_product=DEAD-family helicase | location=TGGT1_chrII:2173899-2186012(+) | protein_length=1158 | sequence_SO=chromosome | SO=protein_coding_gene | is_pseudo=false	MSPELGREHGNGDTAEVSPVSVSGSEGAAEPDNARKESQRSAPEAGSQEEDDREEGEVRSSGSSDVDNGDRAAEARGGEQENEATRGRKRVLPAAGKEPPSVRRAVAVSALPAPRFSSRLPPCRPTAPSSSKKFPDGHGDIDGGAHSGASHRKQDEASVVAAVSSPPPACGVTSALPKRTFSSSTLDLQPSAGLARSPVSALSAAKQEASICPRSSRYSREEETRVGGRHVRDGDRRTREDDRRRTDDDSRDGRDDRRTREDDRRRTDDDSRDGRDDRRTREDDRRRTDDDSRDGRDDRRTREDDRRRTDDDSRNGRDDRRTREDDRRHRDEARTEGREDRRGRENDRRGREEDRVRSDGKDEDREGSGGRERDSRSGRDAVGTKRGDSARQTKEDGED…	0	91.966	25	23	36	23	1158	130.9	8.13	88.62	23	1	1.005	1.005	0.987	0.987	0.992	0.992	0.995	1.013	0.952	0	0.01	0.01	-0.02	-0.02	-0.01	-0.01	-0.01	0.02	-0.07	0.994074	0.666004	0.321539	0.188352	0.603251	0.373361	0.438211	0.0810268	0.801143	0.418008	0.999123	0.990049	0.971021
FALSE	High	Master Protein	TGGT1_311030-t26_1-p1	transcript=TGGT1_311030-t26_1 | gene=TGGT1_311030 | organism=Toxoplasma_gondii_GT1 | gene_product=U3snoRNP10 domain-containing protein [Source:UniProtKB/TrEMBL;Acc:S7W237] | transcript_product=hypothetical protein | location=TGGT1_chrXI:1692933-1708438(-) | protein_length=3738 | sequence_SO=chromosome | SO=protein_coding_gene | is_pseudo=false	MVSELQRQLALHRQTRGVGSSSTASCSSARRQHAAPSLLFDPRKAASIDIETLRDVALTSLQSLSRREPLVEVLEPFFALSASRQGKNSPQSRDFMTEDQSRVLDRRVSICCDLLGPFFLLQDAQYLLEYLLRQYAIHQHNQDALLALALPYHNSPVFVRLVRLMTLPPNSPWIFLERMRASGAPLQRRDLVKVVLSSPFLLQFLVDTVARVSAPLSAARLKEASLSPLPSHLQDGRAGNDEILLMPTSRLPAQNTPLLSFFTLLVSESIVAAPSLAAVRTLTPCLLPFLLSTLHPTSAVRTPELHAAGLAILAQIAMRAPLDPAILVAAMQQLSQTLVLSAADDGLPQLSASKENEIFSLLVLIADKQSLALQGTLPCAVTRRLTKWTRLAAATEELL…	0	91.951	9	26	35	26	3738	402.6	6.87	71.51	26	0.997	1.015	0.968	0.988	0.985	1.003	0.957	1.001	1.038	1.033	0	0.02	-0.05	-0.02	-0.02	0	-0.06	0	0.05	0.05	0.92	0.230169	0.580507	0.718861	0.815352	0.941908	0.628984	0.981056	0.470183	0.675069	0.996674	0.989773	0.975418
FALSE	High	Master Protein	TGGT1_205130-t26_1-p1	transcript=TGGT1_205130-t26_1 | gene=TGGT1_205130 | organism=Toxoplasma_gondii_GT1 | gene_product=VOC domain-containing protein [Source:UniProtKB/TrEMBL;Acc:S7UUX9] | transcript_product=hypothetical protein | location=TGGT1_chrVIIa:1506588-1532655(+) | protein_length=4815 | sequence_SO=chromosome | SO=protein_coding_gene | is_pseudo=false	MESCEPGDLGEPPGLSDDSREESTTSQLTSGSTSHDRQTRVADFSQQEQPASPSPSDRSQRGDTRNPFSSAMETEPTSSCDIHAHADQDDPRDATVPGPQVHQSGSNAGAMSIHSQPVSPFTDAQERRLQLHARYQRHQARVVAASRAVEGELLTLCGESKKKAPHLKEATERALLHIQDFRDKAEASIETLSRAACSATSFSEEAAAAEAAEAVFRSFPVKEVLLAASHAVRTHSSKISMLALSLLQRLLTSHQRQLLLLPCAPEDSLLLPQPTARREDSEQDPDDGSASAHAEPPCADAADSRDSSLCFSFEGDLPSEVQQHRDRTEAELAATAASDVLLLLAVLEELLMLHQGDDENFVQLKVLQTALLLLAPDSAVAADASVAHRLLQLFFSLYR…	0	91.287	6	27	37	27	4815	517.3	6.33	56.05	27	1.041	1.064	1.061	0.986	1.026	1.049	1.046	0.995	1.012	1.014	0.06	0.09	0.09	-0.02	0.04	0.07	0.06	-0.01	0.02	0.02	0.293805	0.199828	0.00358213	0.674317	0.670612	0.483723	0.3214	0.687912	0.459847	0.468189	0.996674	0.989773	0.971021
FALSE	High	Master Protein	TGGT1_239100-t26_1-p1	transcript=TGGT1_239100-t26_1 | gene=TGGT1_239100 | organism=Toxoplasma_gondii_GT1 | gene_product=40S ribosomal protein S7 [Source:UniProtKB/TrEMBL;Acc:A0A125YZ18] | transcript_product=ribosomal protein RPS7 | location=TGGT1_chrVI:457170-458270(+) | protein_length=196 | sequence_SO=chromosome | SO=protein_coding_gene | is_pseudo=false	MMNFKKKIVKPQGVEPTEIENEVAKCLFDIETSSQSDLKGDVRHLVISSVKEVEVPQGRKKAFVVFVPHAVYQKTVKKIQGRLVQELEKKLKKHVVLVAQRTMLPLDFKRKGLKVRPRSRTLTAVQDGMLEDIVSPTEIVGKRMRVRVDNTKMLKVFLDPRDKQKDNIEDKLETFAAVYKKLTNKDAVFSFPQHVY	0	91.151	68	13	55	13	196	22.6	9.86	136.2	13	0.975	1.019	1.007	1.009	0.984	1.028	1.016	0.996	1.011	1.053	-0.04	0.03	0.01	0.01	-0.02	0.04	0.02	-0.01	0.02	0.07	0.425334	0.383658	0.78032	0.310379	0.479585	0.174648	0.626888	0.896166	0.476745	0.212908	0.996674	0.990049	0.984106
FALSE	High	Master Protein	TGGT1_229360-t26_1-p1	transcript=TGGT1_229360-t26_1 | gene=TGGT1_229360 | organism=Toxoplasma_gondii_GT1 | gene_product=Transaldolase [Source:UniProtKB/TrEMBL;Acc:S7V2K7] | transcript_product=transaldolase | location=TGGT1_chrVIII:196233-200460(-) | protein_length=550 | sequence_SO=chromosome | SO=protein_coding_gene | is_pseudo=false	MYLCMHASVPIYMSSGMCLSRRVNLCRNTLKALENIARWLSCLRSTYSRRRDSVFLSFSATLSRSTKAASTERTCGSSAHTNTGTDLPALPRVRRSTFRLREFFPSFLEFTDCRLQSFLVSRRVPRHSVRHSIQKLAFLRAVLHAPAPKQHRSAHAPFFPVAVKDTLPLFSRGIYLSVKMPQSKKRVSAAHEGAASPEAKHQKTNETNGGAAQNALEALRLLSVVVADTGDFVALKKYVPHDATTNPSLLLKAASMPQYAHLMDEAVEVAKKVHGKSARAFFQVEPDDELVEEVIDQLFVRFGVEILKIVPGVVSTEVSAALSFDVQASVEKARKLIRMYKEHGIEKDRVLIKLATTWEGCEAAKILEKEGIHCNMTLLFSFAQAVAAAEAKATLISPF…	0	90.767	30	15	39	15	550	61.4	9.25	123.55	15	1.005	0.978	1.005	0.997	1.002	0.975	1.002	0.987	0.965	0.96	0.01	-0.03	0.01	0	0	-0.04	0	-0.02	-0.05	-0.06	0.487165	0.157807	0.826068	0.735327	0.584329	0.289	0.89454	0.456777	0.168113	0.105341	0.996674	0.989773	0.984106
FALSE	High	Master Protein	TGGT1_249530-t26_1-p1	transcript=TGGT1_249530-t26_1 | gene=TGGT1_249530 | organism=Toxoplasma_gondii_GT1 | gene_product=Importin N-terminal domain-containing protein [Source:UniProtKB/TrEMBL;Acc:S7V0R9] | transcript_product=putative exportin 1 | location=TGGT1_chrXII:4524784-4539887(+) | protein_length=1125 | sequence_SO=chromosome | SO=protein_coding_gene | is_pseudo=false	MSLSDPRALLDASIPFDDAKVALLDQVVAAMFGTTDNHSRDVAHKVLGEFKNMPEAWSYVAVILNKSQDANTKFVALQILENTIQTRWNVLPDAERNGIKVFVTDLVIRLASDEKACQTEKHFVNKVNENLIQIVKQEWPDRWPSFITEICQSSKASQSICENNMRLLNMLSEEVFDFGRSEMVSKKVEKLMTQLTAQFQEVFDVCMFVLKSFVVNAAAMKESLVQQTLKCLAHFLKWIPLGFVFETDLIETLLQHFWEPVQFRADCLRCVTEIASLQLSKEETQVFRERLAVLWLELVGKVLALPPQTLRFEDAGQVPPQMRLFWETIYCQLSLCLTAFLKNHRENIAEPLDKERNGQACVQMLQQVAAMTGLQHDETFQICLDFWFSFAEKLLNEVH…	0	90.496	22	25	44	25	1125	129	5.74	93.72	25	1.019	1.016	0.999	0.986	1.004	1.001	0.985	0.994	0.99	0.998	0.03	0.02	0	-0.02	0.01	0	-0.02	-0.01	-0.01	0	0.207056	0.258175	0.793202	0.479722	0.860219	0.960959	0.515582	0.0369677	0.649444	0.888839	0.996674	0.989773	0.984106
FALSE	High	Master Protein	TGGT1_214260-t26_1-p1	transcript=TGGT1_214260-t26_1 | gene=TGGT1_214260 | organism=Toxoplasma_gondii_GT1 | gene_product=PPDK_N domain-containing protein [Source:UniProtKB/TrEMBL;Acc:S7UQ91] | transcript_product=putative alpha-glucan water dikinase 1 | location=TGGT1_chrX:6069350-6083963(+) | protein_length=1715 | sequence_SO=chromosome | SO=protein_coding_gene | is_pseudo=false	MAQKGHTDAEAPDVRQAFAPLRAQAEETAVTFSLEGNRQLKCILRKMPQNANNQKTVEIIFAFQGPVFAQHEQKQLFMHWGVGNHGHEWKGLSEELQKSLRSTSETTFPWGAAETAFPSPSSSPPPVVTLSFPEAQAPAFISFLFRTQFHEWIRQQGGGNLVLPVHQLLQENEQQTAFLDTIIAVKTDAVREKDASRPLLPEDIQYWKVPLGSGVDIQLVALTYHNAMAAALEIFSDSPAALTLYWSGACSPHDSWQAPSPNSLLGQPGVGCQEESSNAPYGDAGAPAPPAALDGVDPEREKARREKEKLDAQRIACTFGGFASYPQDDKAYWTQFEFLSIPGSQVSLQRVAVVIAGQAVPKGIVFLVREVKADRWFRAPGSGNFFVSLPTHKYWTVLR…	0	90.077	17	24	36	24	1715	191.4	6.13	88.7	24	0.964	1.09	1.089	1.016	0.979	1.107	1.107	0.986	1.069	1.065	-0.05	0.12	0.12	0.02	-0.03	0.15	0.15	-0.02	0.1	0.09	0.379208	0.0425461	0.24404	0.870871	0.753031	0.385194	0.249575	0.6472	0.471739	0.467334	0.996674	0.989773	0.971021
FALSE	High	Master Protein	TGGT1_239820-t26_1-p1	transcript=TGGT1_239820-t26_1 | gene=TGGT1_239820 | organism=Toxoplasma_gondii_GT1 | gene_product=D-3-phosphoglycerate dehydrogenase [Source:UniProtKB/TrEMBL;Acc:A0A125YMY8] | transcript_product=D-3-phosphoglycerate dehydrogenase | location=TGGT1_chrVI:931789-940557(-) | protein_length=604 | sequence_SO=chromosome | SO=protein_coding_gene | is_pseudo=false	MAEATAQKRQKKHGRFRVLVCDPIDQAGMDILSSFADVDTKLKLSEEELCRVVGNYDGLMVRSGTTVTEKIIKHGQKLKIIGRAGVGVDNVCVDAATAQGIFVVNSPNGNTMAAAELTLGLMMALARKIPQADASVSRGEWTRSKFMGRQLNQKTIGIIGLGQVGTHVARVCTALGMEVLAYDPFINEEKAKAVGCRNVALETLLASSDFITLHVPLLDKTRHLINADKLKLIKKDACIINASRGGVIDEKAVAEALMANELAGAALDVFEEEKEFSKDNPLIQAKANGRNIILTPHIGASTLEAQHNVAVDVALQFREALLGGLPQSAVNLQCVRSQQLVSLVHLAEILGRLCSKLVDEPVETLHLKIRGSVDSANADVLLLSAAQGVLRTRCDHIVN…	0	90.003	39	20	43	20	604	65.2	6.99	116.71	20	0.966	0.969	1	1.037	1.002	1.005	1.037	1.025	1.051	1.048	-0.05	-0.05	0	0.05	0	0.01	0.05	0.03	0.07	0.07	0.561087	0.60902	0.977669	0.566174	0.652842	0.0342856	0.462195	0.389522	0.434371	0.0217331	0.996674	0.990049	0.996358
FALSE	High	Master Protein	TGGT1_318430-t26_1-p1	transcript=TGGT1_318430-t26_1 | gene=TGGT1_318430 | organism=Toxoplasma_gondii_GT1 | gene_product=Malate dehydrogenase MDH [Source:UniProtKB/TrEMBL;Acc:S7UKG5] | transcript_product=malate dehydrogenase MDH | location=TGGT1_chrIV:1282502-1286316(-) | protein_length=511 | sequence_SO=chromosome | SO=protein_coding_gene | is_pseudo=false	MQDPSGHGNRPRAALVQLQESWVCCAAPNSVFSADIRTVAQMFSPPCASRRPRVGFSQATLCAGRLPVSRFCSLLSFSDLPPRQDTRLFPSSFLNGVASEKTLAFLPYPLPRESVSGGSVQAPGAPVSGVRHDKFAFRLSPGSRPGSVSRFRFHRPSSSATAARHLQGESRPFASCPVTPEATPFPQPVPSSFFKMSRRKIGLIGGGNIGATLALLSAVKELGDVVMFDVVQDLPQGKCLDLYQLTPISGVDVRFEGSNDYSVLKDADVIIVTAGVPRKPGMSRDDLLAINAKIMGQVGEAIKQYCPNAFVICITNPLDVMVYILREKCGLPPHKVCGMAGVLDSARLRTFLSERLNVSVDDIHALVMGGHGDTMVPLPRFTTVGGIPLPELVKMGMIS…	0	89.922	35	13	44	13	511	54.7	8.68	130.67	13	0.983	0.967	0.952	1.048	1.031	1.014	0.998	1.013	1.054	1.019	-0.02	-0.05	-0.07	0.07	0.04	0.02	0	0.02	0.08	0.03	0.273825	0.245089	0.278168	0.187678	0.136371	0.0420379	0.877391	0.159256	0.0241241	0.160575	0.996674	0.989773	0.971021
FALSE	High	Master Protein	TGGT1_286120-t26_1-p1	transcript=TGGT1_286120-t26_1 | gene=TGGT1_286120 | organism=Toxoplasma_gondii_GT1 | gene_product=Prolyl endopeptidase [Source:UniProtKB/TrEMBL;Acc:S7W343] | transcript_product=prolyl endopeptidase | location=TGGT1_chrV:1831629-1840693(-) | protein_length=825 | sequence_SO=chromosome | SO=protein_coding_gene | is_pseudo=false	MLTSWLSVRCCSLIHIGGGRTTRQSFSYMSHFMRPFCRRKLSFLTSFSGHSPTRSDIQVAPLRTESCVAATRGARPHHFLPRATHCSSASSTMVAAGVSHGNRSLTYFPARRDESVVERHFGETVADPYRWLENPDSEETKEFVEEQNNVSRPLYRTPIREKFFAKLEQIYDYPKYGVPFREGDMWFHWYNTGLQNQHVLYGRKSLTDETAEVVLDPNSWTEDGTAAVGNVVFTDDGSLMAYTRSERGSDWKRIFVKRVTDGYLFPDVLKHVKFSSLAWSPDNRGFFYNRYDVDDEDQDDSGRANAQHDFQKAFYHKLGTDQKEDILILAFPDQPKWLSEITVSWDHRFLIAGIAESCSPTNQVWIADLDTIRTSNAQGMFDFSKLKWNKIIENFDAGY…	0	89.783	27	20	35	20	825	93	6.92	98.22	20	0.984	1.012	1.01	0.989	0.974	1.001	0.999	0.994	0.995	0.977	-0.02	0.02	0.01	-0.02	-0.04	0	0	-0.01	-0.01	-0.03	0.271769	0.768118	0.655669	0.242955	0.0681597	0.984205	0.982872	0.235672	0.791033	0.505238	0.996674	0.995152	0.975698
FALSE	High	Master Protein	TGGT1_290160-t26_1-p1	transcript=TGGT1_290160-t26_1 | gene=TGGT1_290160 | organism=Toxoplasma_gondii_GT1 | gene_product=Sortilin [Source:UniProtKB/TrEMBL;Acc:S7UPZ2] | transcript_product=putative sortilin | location=TGGT1_chrIX:3410442-3420211(-) | protein_length=1033 | sequence_SO=chromosome | SO=protein_coding_gene | is_pseudo=false	MYTSRTPHGGLRRWPLSRSSVSAVASRVLSRSVAFHRRLASFLLSRKKTPLCALSSRPSGLQASSGVQTVTMAHSFARGRPPAAGRTLAVFLAFLAVLSPSLLPEFFSEDAQKRESSVLVANAASYANKKVSVSEVSFDSHIEDIQWCGTDHRTILLKTRRGRLYRSQDGGKSWTEITDLLKSSEAATGTVAVDSIIVSPVDKRVVLIVGSKRNHFISEDSAATFRRLKYKNTIHNFHFHPTRPKYAILSTWTDACYSGSGTASRAQSQQDCNHQLFYTRDLGRSFKLVADYVVQFSWGDKKLGNTDHIFFTQHRGRSGDQPRYGGWSKNVDLMYTPDFGATITRLVYRGNKFLLSNGYFFVAKVKDAAKQTVSLLVSTDGGKSFQMAKLPVEIEERSY…	0	89.705	25	23	42	23	1033	113.5	6.67	101.14	23	1.017	1.025	1.033	1.005	1.022	1.029	1.038	0.997	0.989	1.018	0.02	0.04	0.05	0.01	0.03	0.04	0.05	0	-0.02	0.03	0.0190305	0.367884	0.226401	0.728502	0.261931	0.128042	0.0355329	0.943186	0.444333	0.500871	0.996674	0.990049	0.971021
FALSE	High	Master Protein	TGGT1_284190-t26_1-p1	transcript=TGGT1_284190-t26_1 | gene=TGGT1_284190 | organism=Toxoplasma_gondii_GT1 | gene_product=Pyruvate carboxylase [Source:UniProtKB/TrEMBL;Acc:S7UMR6] | transcript_product=pyruvate carboxylase | location=TGGT1_chrV:2598993-2613633(-) | protein_length=1391 | sequence_SO=chromosome | SO=protein_coding_gene | is_pseudo=false	MAPLTQPFALGYSLWRRSEFHKVASASDMSFPGVCVGSFSLRTRWHKSLHGAGTSARAKNAGFVSRLVDTKSRAVGFPGFRSSQNACFDSTWSSTRRPNSAHYHLLPGLLSGDLAFHFQGTREALSSSPRHPRTETFPQVANSVRCSFKPRSVPPLALPQFWRHFASTPTALSSPGVCIPGAPEGETQLEGSGAENGAEKSTWQRPVRPIRKLLVANRGEIAVRVHRACKELGITSVGIYSQEDSQALHRQVFDESYLVGRGLSAVAAYLHYPDIIDVALRHNVDAIHPGYGFLSENAEFAAAVENAGLMLVGPPPEVIRLMGDKVEARSIAERANVQAVPGTNEPVTDFEEAAAFCRQIGFPVMLKAAYGGGGRGMRRVFREEELKEAFERATSEAQA…	0	89.666	21	23	34	23	1391	152	6.99	87.81	23	0.993	1.021	0.997	1.026	1.018	1.047	1.022	1.035	1.061	1.009	-0.01	0.03	0	0.04	0.03	0.07	0.03	0.05	0.09	0.01	0.746787	0.218321	0.243017	0.747238	0.747415	0.61999	0.781248	0.648447	0.471254	0.791723	0.996674	0.989773	0.971021
FALSE	High	Master Protein	TGGT1_242070-t26_1-p1	transcript=TGGT1_242070-t26_1 | gene=TGGT1_242070 | organism=Toxoplasma_gondii_GT1 | gene_product=cAMP-dependent protein kinase regulatory subunit [Source:UniProtKB/TrEMBL;Acc:A0A125YLM5] | transcript_product=cAMP-dependent protein kinase regulatory subunit | location=TGGT1_chrVI:1804976-1810461(-) | protein_length=385 | sequence_SO=chromosome | SO=protein_coding_gene | is_pseudo=false	MGNVCECQKAEIVNEVSLAAPVVTKGSKGKGATGSSSSGQKASGSKAASSNSSTVVPQLTEDDLDTEDEKDDDVVEEMPQPSEAYMSRAKNRQSVSAEAYGEWNKRKKFVAPVYPKTAEQKERITKVIESSFLFSSLDIEDLETVINAFQEVSVKKGTVIIRQGDDGDRLYLIETGEVDVMKKFPGEKENKFLCKMHPGDAFGELALMYNAPRAATVIAADDMLLWALDRDSFTNIVRDAAAKKREIFEESLKEVRILEDMDPYERSKLSDALRTATYEDGDVIIKEGETGDTFYILLEGAAEAIKNDKVVMEYKKGGFFGELALLKDQPRAATVVAKSHVQVAYMDRKSFKRLLGPVEQILMRNQDNYRKAMKQLGLDTKYLDK	0	89.618	50	18	55	18	385	42.8	5.21	141.12	18	0.999	1	1	0.994	0.992	0.994	0.994	0.994	0.984	0.995	0	0	0	-0.01	-0.01	-0.01	-0.01	-0.01	-0.02	-0.01	0.984718	0.99869	0.99507	0.912825	0.439981	0.498479	0.658042	0.868701	0.623109	0.864657	0.999123	0.999749	0.999286
FALSE	High	Master Protein	TGGT1_263300-t26_1-p1	transcript=TGGT1_263300-t26_1 | gene=TGGT1_263300 | organism=Toxoplasma_gondii_GT1 | gene_product=Eukaryotic porin protein [Source:UniProtKB/TrEMBL;Acc:A0A125YUJ9] | transcript_product=eukaryotic porin protein | location=TGGT1_chrVIIb:618828-622551(-) | protein_length=290 | sequence_SO=chromosome | SO=protein_coding_gene | is_pseudo=false	MVLFKDLNKSCADLLTKGYPHEKAWDLEYKYKSKNPEIVNTASVSPAGAFDASSKLKYCVSDVTTEVKMMAMGKSTIDVKYAAPKLKGLTLGAKFDRRGDKTSKDSLDIVAEYKLPTIHSFFSVNPLASSFNFGNVVEYKAFRIGSEVSGKFDASAMKYAVGASYTGVASKAGEFTLSLKTAPSGDAMFGRMIGSVHGKTTDNKSAELAAEVDCNLLDGRTNIQFGGLWYLNDKKDTFLKAKLTQNARVSVALTHKVCDYVSATIGSQIDVSKPSNPDAVKHGLKLEICA	0	89.591	46	13	56	13	290	31.3	8.94	117.89	13	1.002	1	0.998	0.987	0.989	0.987	0.985	0.982	1.018	1.007	0	0	0	-0.02	-0.02	-0.02	-0.02	-0.03	0.03	0.01	0.701193	0.976611	0.757887	0.439188	0.615854	0.121112	0.515475	0.264698	0.677352	0.0949866	0.996674	0.998909	0.983537
FALSE	High	Master Protein	TGGT1_245490-t26_1-p1	transcript=TGGT1_245490-t26_1 | gene=TGGT1_245490 | organism=Toxoplasma_gondii_GT1 | gene_product=Microneme protein MIC8 [Source:UniProtKB/TrEMBL;Acc:A0A125YJZ7] | transcript_product=microneme protein MIC8 | location=TGGT1_chrXII:2242495-2244549(+) | protein_length=684 | sequence_SO=chromosome | SO=protein_coding_gene | is_pseudo=false	MKANRIWCFFAWRMVVRASFLKEMDSIFVSAIRQNVQHTHSALLAKLKEPPDPDDENSWLCRISKKYDACGSREYSDKGLKGTYCPEDFCCSKTACFYGSCGSWCHDNWALCSSSIIYHDEYSYGKCNCKRFQENCDVNAICVHANREDGGAYCQCKEGYWGDGKSCKIDFCQLQPCGAGTCTRTDEGYKCDCPETHKLIVVEDKETCKAKPDFCAEEPCGPPSMVENCVNTDDSYECVCKQGYEVRNGRCEEIDLCADKPCGPDEGVHECVTERQPKLRYRCTCKAGFDLTTLPDGVSQKCLKNFCYEEPCGTRDLVESCKSKAYGYSCLCAAGAMVQVINGKEKCIKADLCRNDPCGPETAVIQCYSHGTSYRCLCKAGYTEVFVNGKSSCQKGDPC…	0	89.374	33	20	50	20	684	74.5	5.43	149.04	20	1.009	1.032	1.041	1.012	1.021	1.044	1.054	1.036	1.04	1.039	0.01	0.05	0.06	0.02	0.03	0.06	0.08	0.05	0.06	0.06	0.622975	0.555773	0.383961	0.580215	0.600154	0.562712	0.438948	0.155082	0.443042	0.00736575	0.996674	0.990049	0.971021
FALSE	High	Master Protein	Q71U36	Tubulin alpha-1A chain OS=Homo sapiens (Human) OX=9606 GN=TUBA1A PE=1 SV=1	MRECISIHVGQAGVQIGNACWELYCLEHGIQPDGQMPSDKTIGGGDDSFNTFFSETGAGKHVPRAVFVDLEPTVIDEVRTGTYRQLFHPEQLITGKEDAANNYARGHYTIGKEIIDLVLDRIRKLADQCTGLQGFLVFHSFGGGTGSGFTSLLMERLSVDYGKKSKLEFSIYPAPQVSTAVVEPYNSILTTHTTLEHSDCAFMVDNEAIYDICRRNLDIERPTYTNLNRLIGQIVSSITASLRFDGALNVDLTEFQTNLVPYPRIHFPLATYAPVISAEKAYHEQLSVAEITNACFEPANQMVKCDPRHGKYMACCLLYRGDVVPKDVNAAIATIKTKRTIQFVDWCPTGFKVGINYQPPTVVPGGDLAKVQRAVCMLSNTTAIAEAWARLDHKFDLMY…	0	89.338	35	13	73	7	451	50.1	5.06	231.94	13	1.018	1.018	1.01	0.991	1.009	1.009	1.001	1.011	1.074	1.059	0.03	0.03	0.01	-0.01	0.01	0.01	0	0.02	0.1	0.08	0.312923	0.199632	0.31115	0.814747	0.739553	0.843364	0.977282	0.795954	0.0358507	0.30197	0.996674	0.989773	0.971021
FALSE	High	Master Protein	TGGT1_312230-t26_1-p1	transcript=TGGT1_312230-t26_1 | gene=TGGT1_312230 | organism=Toxoplasma_gondii_GT1 | gene_product=DNA topoisomerase 2 [Source:UniProtKB/TrEMBL;Acc:S7W1T2] | transcript_product=putative DNA topoisomerase 2 | location=TGGT1_chrXI:2472947-2490813(-) | protein_length=1658 | sequence_SO=chromosome | SO=protein_coding_gene | is_pseudo=false	MSSSEDEEFQNSSPSLSPARSRPEKGKKSGGGKPKTIEQRYQKKSQLEHILLRPDTYIGSTEVHTQALWVMEEGQETMVYKTINYVPGLYKIVDEILVNAADVKAREGEEQKGKPLKPGARRMSAIKIDINKASGRISIWNDGEGIPVAIHQEHKVYVPEMIFGQLLTSDNYDDSECRVTGGRNGYGAKLTNIFSREFTVECADGERKKKFKMTWTKNMEQKSESEISSYNGTDYVKISFIPDFAKFGMTGFDDDSLSLLRKRAYDLAGTSGVKVFLNGTRIDINSFSQYVDLYLGGRKSEKPSKEKEEFDESDDDWDEGPKRKKAAKKNGKKGELEDEEDVANGVEKKVIKIHDKQWRWEVVISSTDGGQFQQVSFVNSICTTKGGTHVSHVIEPLLA…	0	89.282	18	25	32	25	1658	185.8	7.44	69.22	25	1.003	0.982	1.02	1.011	1.013	0.993	1.031	1.021	1.008	1	0	-0.03	0.03	0.02	0.02	-0.01	0.04	0.03	0.01	0	0.732258	0.690821	0.484862	0.389689	0.0802154	0.828738	0.234223	0.451816	0.72971	0.999148	0.996674	0.993534	0.973444
FALSE	High	Master Protein	TGGT1_318710-t26_1-p1	transcript=TGGT1_318710-t26_1 | gene=TGGT1_318710 | organism=Toxoplasma_gondii_GT1 | gene_product=ATP-binding cassette sub-family F member 1 [Source:UniProtKB/TrEMBL;Acc:A0A125YVQ3] | transcript_product=ATP-binding cassette sub-family F member 1 | location=TGGT1_chrIV:1070737-1079983(+) | protein_length=811 | sequence_SO=chromosome | SO=protein_coding_gene | is_pseudo=false	MGQDSESIIDALRTVTCGKVDDGTLEYMAGMLEEEGVARLSVDTACDLIGDFLHDAGVSKNDKETRAVCEKLLSLLRKDAAPRDNAAGGPSEQTQGGNSTDDLDGSGVKRADGEGSLSKPRDFATPMKLGDMAGHSGRSFDDPFLGLHQNSAKVNYNAPVLYGTDPEGAAAAAAAAQQQQRLQQQRERHLRQLKEWEKNKPPLPPPKRKHGDKQLKKMGEGILVDSFSIAVAGRELLIDAQLKLVKGRRYGLVGRNGIGKSTLLSALVRQEIHGVDPDIAIGMVEQEHLWGSETVLDAVLAVDEDRLRLLEEEQVLLKQEDQSEKVGRRLGVIYERLQEIDAANAEKTAATILRGLGFTESMQHMKVTALSGGWRMRVLLARCLFSDPDVLLLDEPTNH…	0	89.279	26	21	35	21	811	89.1	5.91	93.85	21	0.993	0.965	0.99	1.002	0.994	0.967	0.991	0.976	0.989	0.992	-0.01	-0.05	-0.02	0	-0.01	-0.05	-0.01	-0.03	-0.02	-0.01	0.54403	0.0503842	0.313058	0.966478	0.910383	0.455949	0.792622	0.383599	0.0114995	0.224149	0.996674	0.989773	0.971021
FALSE	High	Master Protein	TGGT1_220860-t26_1-p1	transcript=TGGT1_220860-t26_1 | gene=TGGT1_220860 | organism=Toxoplasma_gondii_GT1 | gene_product=DEAD/DEAH box helicase [Source:UniProtKB/TrEMBL;Acc:A0A125YVU2] | transcript_product=DEAD/DEAH box helicase | location=TGGT1_chrII:9310-13186(+) | protein_length=602 | sequence_SO=chromosome | SO=protein_coding_gene | is_pseudo=false	MAQKEGVAVAMAAGLAAAAAAMDDQIDQNALQAFMRQQMSRAGGRGCATPDARDAGEENGVKDAGGARATAESKSTGGEETTGAPGFATDFEAVKHKHLREVDDQSAVVVDRADGSSGAPVSASSWTDLNLKKELLLGVENQGFSKPSKIQAAALPLIFDRDENLIAQAQNGSGKTATFALAMLTKVDNNLKAPQALCLCPTRELAQQTVRVIESLARFTDTSIFVAIPQKSDAPAASPMPAQGTGKCKVYTTLTSPVVQSPIVVGTPGKCMELLKKRKFGADTVKLFVLDEADELINFSNNMAPQVQQIRRFFPQRLQILLFSATFSEEVRGFAEKLMPTANKITVKKEELTLSCIKQYYIPCDQRAASLGAAPTPARDSPLPYRLDSSFYQKFAVLS…	0	89.172	40	19	26	19	602	65.1	6.58	83.12	19	0.999	1.047	1.047	1.012	1.011	1.06	1.06	1.079	1.047	1.041	0	0.07	0.07	0.02	0.02	0.08	0.08	0.11	0.07	0.06	0.975189	0.466512	0.417387	0.336718	0.795247	0.442709	0.401676	0.277186	0.20755	0.0441936	0.999123	0.990049	0.973444
FALSE	High	Master Protein	P04083	Annexin A1 OS=Homo sapiens (Human) OX=9606 GN=ANXA1 PE=1 SV=2	MAMVSEFLKQAWFIENEEQEYVQTVKSSKGGPGSAVSPYPTFNPSSDVAALHKAIMVKGVDEATIIDILTKRNNAQRQQIKAAYLQETGKPLDETLKKALTGHLEEVVLALLKTPAQFDADELRAAMKGLGTDEDTLIEILASRTNKEIRDINRVYREELKRDLAKDITSDTSGDFRNALLSLAKGDRSEDFGVNEDLADSDARALYEAGERRKGTDVNVFNTILTTRSYPQLRRVFQKYTKYSKHDMNKVLDLELKGDIEKCLTAIVKCATSKPAFFAEKLHQAMKGVGTRHKALIRIMVSRSEIDMNDIKAFYQKMYGISLCQAILDETKGDYEKILVALCGGN	0	89.037	51	15	32	15	346	38.7	7.02	89.65	15	1.017	0.956	0.981	1.088	1.106	1.04	1.067	1.104	1.043	1.065	0.02	-0.06	-0.03	0.12	0.15	0.06	0.09	0.14	0.06	0.09	0.589295	0.39075	0.349474	0.298453	0.127071	0.175394	0.282135	0.424662	0.678199	0.606421	0.996674	0.990049	0.971021
FALSE	High	Master Protein	TGGT1_283550-t26_1-p1	transcript=TGGT1_283550-t26_1 | gene=TGGT1_283550 | organism=Toxoplasma_gondii_GT1 | gene_product=hypothetical protein | transcript_product=hypothetical protein | location=TGGT1_chrV:2910449-2923806(+) | protein_length=4211 | sequence_SO=chromosome | SO=protein_coding_gene | is_pseudo=false	MAACPFCQDDSGAPKEVPLSLSLSQVDNAFLEVLAHLSGLPLFFSSTLVESRASTPAAAREGDRETPTERTREADKEREKAPRGGPRRRRDFPAYAAERGDRSLSADLLEDKTPGKAQDIATELVSQRSSSSSRSCVCPSPRYEYFTPSPALSSQQRGCAQIDGRHLRSFPWVAFSPSPSPALLGERLWRSLQLLRGSVSPAAPRPYSTSHTGKRADFPLHAQAENRKSPLFVSFPSVGQPPVAPLELEPERSPVLPSASGDFRFFSASLETPPSPKRTPSVHSTKSMGTKALAPSPVLSRRQARRQRKRRAAEEAKRLASSSPCPSASLVSAQRGARDPTRGGSEAQGTTASSQKFALSRVEQPVDYLFKRRVGRDEERCEGKQGKQTVQLIQENEGG…	0	89.021	8	26	32	26	4211	455.5	7.14	68.33	26	1.069	1.003	1.059	0.986	1.054	0.989	1.044	1.025	1.013	1.082	0.1	0	0.08	-0.02	0.08	-0.02	0.06	0.04	0.02	0.11	0.0871067	0.975394	0.508781	0.266768	0.183616	0.921966	0.629564	0.776148	0.554398	0.274649	0.996674	0.998909	0.973444
FALSE	High	Master Protein	TGGT1_255190-t26_1-p1	transcript=TGGT1_255190-t26_1 | gene=TGGT1_255190 | organism=Toxoplasma_gondii_GT1 | gene_product=Myosin motor domain-containing protein [Source:UniProtKB/TrEMBL;Acc:S7WI35] | transcript_product=myosin C | location=TGGT1_chrVIIb:4925758-4933694(+) | protein_length=1171 | sequence_SO=chromosome | SO=protein_coding_gene | is_pseudo=false	MERKQTQMILGRRLAKDSPEVKHFQRKSSVVPFGRDGRAATNFTCWTADCPAVKADPTLVFAKCIVVGGSMDTQLELEQVDPPARGTFTVAPTDVFNANELIEPETVDDIGYLPHTNVACVLDVLKSRFLRSIIYTTAEPLLVAINPFKDLGNTTDAWISTYRNASKPEMLPPHVFKTARAALEDLEGYKKNQSIIVSGESGAGKTEATKQIMRFFASASSEVRTTIQDTIMAGNPILEAFGNAKTIRNNNSSRFGRFMMLDVSSHRGIQHGSISNFLLEKVRVVSQEANERSYHIFYQLLKGATSEMRAKYHLRSLKEYAYLNGKNGGCYDVPGIDDKADFEEVLQSLDAMQITGSKRHSVFSILSGLLLIGNVSIEGKDAQGVPDAAYISPQSEEIL…	0	88.763	23	26	45	26	1171	132.6	7.91	89.74	26	0.991	0.964	0.972	1.045	1.036	1.008	1.016	0.99	1.013	1.012	-0.01	-0.05	-0.04	0.06	0.05	0.01	0.02	-0.01	0.02	0.02	0.153755	0.171816	0.0252933	0.348852	0.441875	0.868007	0.67376	0.867865	0.843512	0.792193	0.996674	0.989773	0.971021
FALSE	High	Master Protein	TGGT1_218410-t26_1-p1	transcript=TGGT1_218410-t26_1 | gene=TGGT1_218410 | organism=Toxoplasma_gondii_GT1 | gene_product=60S acidic ribosomal protein P0 [Source:UniProtKB/TrEMBL;Acc:A0A125YFP0] | transcript_product=ribosomal protein RPP0 | location=TGGT1_chrXII:1471598-1473146(+) | protein_length=314 | sequence_SO=chromosome | SO=protein_coding_gene | is_pseudo=false	MAGPKGKSDKRKTYFSRLFALLEKYPRVLVVEADHVGSKQMADIRLALRGKAVVLMGKNTMIRTALKQKMSEMPQLEKLLPLVRLNVGFIFCIEDPAEVRRIVAENKVPAPARQGVFAPIDVFIPAGPTGMDPGSTSFFQALGIATKIVKGQIEIQNEVHLIKEGDKVTASAATLLQKLNIKPFEYGLAIQHVYDDGSVYKASVLDITDEVILEKFRAGTMNVAALSREVGFPTTASAPHSILEAFKFCTSLVLESDYSFPQMQRIKDILENPEAFAAVAAAAAPAAGAAAAAEAPKEEEPEEEEDDMGFSLFD	0	88.736	64	15	40	14	314	34.1	5.6	107.93	15	1.069	1.006	0.999	0.946	1.011	0.951	0.945	0.938	0.935	0.958	0.1	0.01	0	-0.08	0.02	-0.07	-0.08	-0.09	-0.1	-0.06	0.351394	0.935898	0.988568	0.614836	0.824671	0.273997	0.162096	0.488501	0.276999	0.310538	0.996674	0.998909	0.998911
FALSE	High	Master Protein	P35580	Myosin-10 OS=Homo sapiens (Human) OX=9606 GN=MYH10 PE=1 SV=3	MAQRTGLEDPERYLFVDRAVIYNPATQADWTAKKLVWIPSERHGFEAASIKEERGDEVMVELAENGKKAMVNKDDIQKMNPPKFSKVEDMAELTCLNEASVLHNLKDRYYSGLIYTYSGLFCVVINPYKNLPIYSENIIEMYRGKKRHEMPPHIYAISESAYRCMLQDREDQSILCTGESGAGKTENTKKVIQYLAHVASSHKGRKDHNIPGELERQLLQANPILESFGNAKTVKNDNSSRFGKFIRINFDVTGYIVGANIETYLLEKSRAVRQAKDERTFHIFYQLLSGAGEHLKSDLLLEGFNNYRFLSNGYIPIPGQQDKDNFQETMEAMHIMGFSHEEILSMLKVVSSVLQFGNISFKKERNTDQASMPENTVAQKLCHLLGMNVMEFTRAILTP…	0	88.643	13	27	40	20	1976	228.9	5.54	91.29	27	1.076	1.039	1.091	0.933	1.004	0.969	1.018	1.032	1.014	1.043	0.11	0.06	0.13	-0.1	0.01	-0.04	0.03	0.05	0.02	0.06	0.224939	0.0598188	0.147587	0.270868	0.957078	0.539586	0.342753	0.843928	0.868864	0.761494	0.996674	0.989773	0.971021
FALSE	High	Master Protein	TGGT1_232130-t26_1-p1	transcript=TGGT1_232130-t26_1 | gene=TGGT1_232130 | organism=Toxoplasma_gondii_GT1 | gene_product=hypothetical protein | transcript_product=hypothetical protein | location=TGGT1_chrVIII:1876792-1879382(+) | protein_length=456 | sequence_SO=chromosome | SO=protein_coding_gene | is_pseudo=false	MDPRGQPVGPARPGVPPQMMRPQGGPPPGAFPGGPRGPAGAPFGAPMGPGGPMGPPRGPGAQMGPPRGPGPQMGPPRGPGPQMGPPRGQQGPPPPGVRGLMPGMTPQGPPGARPGMPPPGAMPMGPDGKLRMQPQTAPGAPPAGMPGTGMPPQQVPRGPMGHVGGGTGGMPAPDARQPVPSKTDSHGLQQKDLAQRSRNLRTLEDDERSDHQFGEEILNKGLQTFARLVALNDVGDLGAWNGYTWKSRRPPSVFFINITHDPEGRLWAVTENNEVGKLTVKGFKAIGHIGQEDVVDITFDPKDGTLWAINRVGELLHWNGYTWDKKYHAGFHKLRAATFDRKGNLWVVNTAGEIAMWDEEEQQWDLKKVPGATRLHTLAFDENNKLWVLGSHGELMLLA…	0	88.518	40	16	45	16	456	48.8	9.91	122.11	16	0.992	0.996	1.023	0.989	0.98	0.985	1.011	0.979	1.001	1.008	-0.01	-0.01	0.03	-0.02	-0.03	-0.02	0.02	-0.03	0	0.01	0.737109	0.746653	0.453121	0.704058	0.104293	0.469318	0.173948	0.185511	0.959011	0.12936	0.996674	0.995152	0.973444
FALSE	High	Master Protein	TGGT1_231410-t26_1-p1	transcript=TGGT1_231410-t26_1 | gene=TGGT1_231410 | organism=Toxoplasma_gondii_GT1 | gene_product=hypothetical protein | transcript_product=hypothetical protein | location=TGGT1_chrVIII:1401693-1406022(+) | protein_length=571 | sequence_SO=chromosome | SO=protein_coding_gene | is_pseudo=false	MNFSSSARWLAVRQSQTLGHTTRATVAAGRRVLAHSPAATEFTSFQSSHIGGDVCKLPLAVALGAAPSALGYGSAKHNQQRQYATLGSGWSFSKVQYTKYRITKPWTTDTTFDDIILSQPSKEDFAKFTKEAPLFLRFLKLVTDVEGRQEAFIQFAKRCENGLTVEKDVYVTKKELVDCLWKNGYTDTEINAFEIAFPADYKFHYPELAVLFDLTEEDCYKYCIRQRAATPEELVELKYTKPKNLVSSYGLCFLGVWFGLSNTVLSNAWFYSKTFPFGAVFYMLGSYFYRDIREKLWKEEKSLIHTAQENKNMGEESVYKQMKKYATDTKCLDYLSTFRTEVEDQIANYKVALVSQMRRQLTERLVEKLNGIQQAEKLIQGSLQDVMIREIVSSFKDLY…	0	88.507	35	21	45	21	571	64.6	8.19	114.8	21	0.991	0.986	0.995	1.018	1.009	1.004	1.013	1.037	0.996	1.026	-0.01	-0.02	-0.01	0.03	0.01	0.01	0.02	0.05	-0.01	0.04	0.860384	0.248813	0.0728466	0.0783486	0.881002	0.674041	0.129669	0.0793196	0.861474	0.0089115	0.996674	0.989773	0.971021
FALSE	High	Master Protein	TGGT1_224890-t26_1-p1	transcript=TGGT1_224890-t26_1 | gene=TGGT1_224890 | organism=Toxoplasma_gondii_GT1 | gene_product=hypothetical protein | transcript_product=hypothetical protein | location=TGGT1_chrX:2618782-2623220(-) | protein_length=1075 | sequence_SO=chromosome | SO=protein_coding_gene | is_pseudo=false	MDLEERDSLPCSEGGFSPPVSLSPRHEVQSGSSFFQVNAPFATVAMPVRLTAAALDSNSHFLGVPGSTRGCASTVAGAARDASMCATDGGDCEVDSSVGGACYSTQGFLEHKSNRFCGEECDHVRGSSESDKFGDSGDISKGDEGQGQGQDLATEIGLRGTPQWPLEGEGQVKGRKLRDDRTKSRFGTCALSPERFKPTLVSISAEDRDRLLLDTGVTLEEAEERWWKGLFQDQETVVKLANNGVNTLADWIQDAAVDAGEKPFLISAESNMSLSYRHVNERSNAVAVWAHKDRRGAGTLEVLLREGTKNLIIDEELAQIPITVPSKMSPAEDSDKAPTEGNDSEKRTPSGEGKGDEGKIRQRRESWVMVPDPAFSADAERGQAALFNAEKGQGAACEP…	0	88.464	22	20	36	20	1075	116.6	5.59	86.03	20	1.039	1.017	1.004	0.93	0.967	0.946	0.934	0.95	0.945	0.925	0.06	0.02	0.01	-0.1	-0.05	-0.08	-0.1	-0.07	-0.08	-0.11	0.0841584	0.0766621	0.886366	0.105028	0.128641	0.113525	0.107702	0.229608	0.000640815	0.0558015	0.996674	0.989773	0.991016
FALSE	High	Master Protein	TGGT1_263070-t26_1-p1	transcript=TGGT1_263070-t26_1 | gene=TGGT1_263070 | organism=Toxoplasma_gondii_GT1 | gene_product=Protein kinase domain-containing protein [Source:UniProtKB/TrEMBL;Acc:S7WDT1] | transcript_product=CMGC kinase, CK2 family | location=TGGT1_chrVIIb:801033-806072(+) | protein_length=539 | sequence_SO=chromosome | SO=protein_coding_gene | is_pseudo=false	MSLPFPVRSTKIGSFRLAVFYRGCSVRPVSGLRRPAIVPCSWRQVPISISGFPSPTAHTSSPQLHSLTPPQRCFDTVPSLALQGQRIRASLRMAPPRPTADAGAPPATVAPAARGLSGGPSYAASQEPESSQNVARYYADVNLHKPREYWDYENFVIRWGVPDGYEVVRKLGRGKYSEVFEGLRVGPPSATALALAGASPSGSGNSASVTSLPSLNSVGSSNSFVSTSSCSQPVRAASASSAGTTAGEAARLGFEGEKCVVKILKPVKKKKIRREVKILQNLCGGPNIIRLLDVVKDPASRTPALVFEHINNQDFKTLYPTLTDYDIRYYIFQILKALDYCHSQGIMHRDVKPHNVMIDHSKRELRLIDWGLAEFYHPGREYNVRVASRYYKGPELLVD…	0	88.268	40	18	33	18	539	59.8	9.07	101.57	18	0.991	0.994	1	1.005	0.996	0.998	1.005	1.033	1.011	1.041	-0.01	-0.01	0	0.01	-0.01	0	0.01	0.05	0.02	0.06	0.60198	0.876854	0.99776	0.567475	0.863302	0.964017	0.866992	0.426469	0.651942	0.419562	0.996674	0.998909	0.999286
FALSE	High	Master Protein	TGGT1_313430-t26_1-p1	transcript=TGGT1_313430-t26_1 | gene=TGGT1_313430 | organism=Toxoplasma_gondii_GT1 | gene_product=hypothetical protein | transcript_product=hypothetical protein | location=TGGT1_chrXI:3334289-3356350(+) | protein_length=5639 | sequence_SO=chromosome | SO=protein_coding_gene | is_pseudo=false	MSLFGGGGGSSGTAPGSKSLFGATTSGTSSGLLGASSSSSSSLFGGGGSSLFGNSSSSIFGAGSTAKPAQTPGLFGSGATSSSFSASPSSLFGSAGATEKPAASGGLFGSTGANSSSSLFSGGGAASAATSGGGLFGSAASGSASSSSSSSSSSLFGGGGGAANPAASGGLFAGTGASSSSSSSSSLFGSGSSAEKPTASGGLFASPGANASSSLFSGGSTATGTSGGGLFGNAASANSSSSSSSSSSSSSSSSSSLLFGSGGATETPATSGGLFGSKGANSSSSLFSGAGTASTGTSKGGLFGNATSASSSSTSSASASSSSSSSSSSSLFGSAGATEKPAASGGLFGSTGANSSSSLFSGGGAASAATSGGGLFGSAASGSASSSSSSSSSSLFGGG…	0	88.259	6	25	29	25	5639	593	6.8	58.8	25	0.941	0.989	0.953	1.014	0.954	1.004	0.967	0.985	0.987	1.011	-0.09	-0.02	-0.07	0.02	-0.07	0.01	-0.05	-0.02	-0.02	0.02	0.759352	0.947597	0.455002	0.862314	0.690535	0.962804	0.388239	0.664285	0.848335	0.741787	0.996674	0.998909	0.973444
FALSE	High	Master Protein	TGGT1_266990-t26_1-p1	transcript=TGGT1_266990-t26_1 | gene=TGGT1_266990 | organism=Toxoplasma_gondii_GT1 | gene_product=Coatomer subunit beta [Source:UniProtKB/TrEMBL;Acc:S7UHC3] | transcript_product=beta-COP | location=TGGT1_chrIX:687782-698362(+) | protein_length=1103 | sequence_SO=chromosome | SO=protein_coding_gene | is_pseudo=false	MELERNCMLYIYSSRGDAPSTAELQKKIESPNEATKAEGMQDLIIGMTQGEAYTRLLMTVIRYAMPSKDKRVKKLTQLYLEIVGKCRPDGSLKEEMILVCNALRNDLMSPNEYVRGSTLRLLSKIRQFKVLEPLVEAILQNLTHRHSYVRRNAVMCVYSIVKNFGLDAIPAAIDQIEQMLLSEGDLTTKRNAFLVLVHCASKRAIQFILQQRSEDGTGGLGFLLSSGDLFQLALLELLRKVCRQKQQQKAGLLRLIVSILPNTLPSVAYEGACSLLALSRAPVSLKAAAGAFASLLCGNSDNNVKLIVLDRLQECVQRASRRTMEEFVIDLLRGLQTPSLEVRRKILDLVLQIVGKNSVEQLLNVLKRELLRTAEPEQLTVPRTMEYRRLLIKAVHSCC…	0	88.129	22	23	40	23	1103	121.9	6.61	79.54	23	0.966	0.967	0.977	1.037	1.002	1.003	1.013	1.021	1.027	1.046	-0.05	-0.05	-0.03	0.05	0	0	0.02	0.03	0.04	0.07	0.602289	0.539836	0.134947	0.20607	0.975319	0.957862	0.317388	0.61492	0.0756916	0.0366438	0.996674	0.990049	0.971021
FALSE	High	Master Protein	TGGT1_315860-t26_1-p1	transcript=TGGT1_315860-t26_1 | gene=TGGT1_315860 | organism=Toxoplasma_gondii_GT1 | gene_product=EF hand domain-containing protein [Source:UniProtKB/TrEMBL;Acc:S7VUW3] | transcript_product=EF hand domain-containing protein | location=TGGT1_chrXI:4970512-5000308(+) | protein_length=6367 | sequence_SO=chromosome | SO=protein_coding_gene | is_pseudo=false	MDPSQGRNGPPARPPPQPGVAASPFPSFSPPPLPPVPLGSFDTQPGGSPSLPAFAASLSPTSTHSTTGRLIGQPRVGAETFSLNRNLCSTSSSSSSTSNSSSSTSNSSSSSSSSSSSTPTSSSASAFASISPPGGLPSVLSSAPAPLWPSGGSQDPQGGEKNAFAENGWADSGVVLPGDESSSTSSTSQSPDASPRQTLSYPSAPLWASCEAVDWALSLPFSLPFSVLPTSTQTLLGYPRSLRFVARLLRLLVPFPNSFEPFHSKKRCPRGAFSALVEELRQTLSPKLAGGLLYVQRTLDTVDDALWTKLQHLLHKPNDVHAFHGLLLDIISRVKSLAPGATAIFPGGVCLDADSRPTFLLFLVHRLHRSTSSSSFSAPYGEGASGYASASYAFAVINA…	0	87.483	5	27	31	27	6367	689.6	7.28	65.11	27	0.951	1.01	0.932	0.972	0.924	0.981	0.906	0.945	0.957	0.931	-0.07	0.01	-0.1	-0.04	-0.11	-0.03	-0.14	-0.08	-0.06	-0.1	0.222023	0.92931	0.425891	0.740243	0.344627	0.498672	0.0649375	0.224014	0.640533	0.195482	0.996674	0.998909	0.973444
FALSE	High	Master Protein	TGGT1_243730-t26_1-p1	transcript=TGGT1_243730-t26_1 | gene=TGGT1_243730 | organism=Toxoplasma_gondii_GT1 | gene_product=Rhoptry protein ROP9 [Source:UniProtKB/TrEMBL;Acc:S7UG40] | transcript_product=rhoptry protein ROP9 | location=TGGT1_chrVI:2733555-2736099(+) | protein_length=353 | sequence_SO=chromosome | SO=protein_coding_gene | is_pseudo=false	MTHPNPLQTRFSRSASLVSRMPLVRLFFTIAAPLLFSPSPFPFLPLKTHCLAIQLGKPQGSPPASQKEAIRDTGVSHQKGEPSDSSSEPKPQGTVAETPGAASAAAAEVGRPSRSSAGPGKKKRGPSLFTEETMGPSKRHPCLKTLAAAVERFQAQHLTGRDAAKAFVDAIQECGIQVVASDYDRTAISVHSGGSARRDDLSVLGALTPDFKLLGEELTRRNIPIYFVTFSDKGENRGDRIAAGPLVEATLKASNANFEAQGVFGYYPPFYSEPEDYAPLGLSAPMPTDKSFHIQQVSKASGVSEDKILLLDDDRANCVNFCRSGGAAIHVSGHEGFDFGAVRVVVKPSLIMQ	0	87.369	58	18	53	18	353	37.7	8.31	131.37	18	1	0.984	0.991	0.992	0.992	0.976	0.983	0.981	0.979	0.963	0	-0.02	-0.01	-0.01	-0.01	-0.03	-0.02	-0.03	-0.03	-0.05	0.98829	0.509196	0.663649	0.841734	0.634567	0.363923	0.477508	0.00778604	0.281634	0.236384	0.999123	0.990049	0.978433
FALSE	High	Master Protein	TGGT1_234420-t26_1-p1	transcript=TGGT1_234420-t26_1 | gene=TGGT1_234420 | organism=Toxoplasma_gondii_GT1 | gene_product=AAA domain-containing protein [Source:UniProtKB/TrEMBL;Acc:S7W4G4] | transcript_product=ATPase, AAA family protein | location=TGGT1_chrX:4262179-4269625(-) | protein_length=588 | sequence_SO=chromosome | SO=protein_coding_gene | is_pseudo=false	MFFPSVGGSGAAGAAPTLTSQKVNVPGKDDDITGKFDPTALERGAKALKELDSSPNAAKAFEVTKLQEQTKQKQLQKEMEELATVRARAQAEHARAEAEERRKTINHAQEQERVTAQYRAQLEAEAYQKKLQDQQKQNEVWLEQQHQQFLRQQELRKRQEQELLEMRRQQMREEKALEREVMRERIQEETKGRIKQERENVDIHLREMRAKAAEFRKTRLETLQTVFSGVGNAFNELMSDRSRLATLVGSLSLLACGVYGARTGAHLAGKYWESRLGKPPLVRETSRWVFSKSFFSPLRFLRGKPKKDFQEKIVLEEELAERLQWTTNSLIASKANGTPFRHMLLYGAPGTGKTLFARTLARESGMDYAIMTGGDVGPLGMDAPNEINKLFSWANKSRK…	0	87.285	32	19	45	19	588	66.7	8.76	113.52	19	0.986	1.003	1.006	1.003	0.989	1.007	1.009	1.001	1.004	1.023	-0.02	0	0.01	0	-0.02	0.01	0.01	0	0.01	0.03	0.29172	0.815563	0.923065	0.794648	0.62777	0.80574	0.852748	0.96158	0.738141	0.536419	0.996674	0.995152	0.992295
FALSE	High	Master Protein	TGGT1_258580-t26_1-p1	transcript=TGGT1_258580-t26_1 | gene=TGGT1_258580 | organism=Toxoplasma_gondii_GT1 | gene_product=Protein kinase domain-containing protein [Source:UniProtKB/TrEMBL;Acc:S7W7J7] | transcript_product=rhoptry protein ROP17 | location=TGGT1_chrVIIb:3287362-3289188(-) | protein_length=608 | sequence_SO=chromosome | SO=protein_coding_gene | is_pseudo=false	MELVLCFVIITISGVIRESSALLLRSPTSNDVFGELVASAERAQPLATRLTKRISRLNFNDREDDFWEDHGDASWNNSYTLVNGRTTLGSENRRRPASHSLIERPYYRDGRLSPVLGVQERRGRSVHSYHEEPVSFFDQRAFDEYTFRRRSQLHRQRARAGLRSRIKQNVRRLWTSARGAVRGWGRRVRRKIGDLFVGHLMPQLRRLRFWDQGLPPVVPPLIGNEPGQASVALVAERMEARLREKTLTEKNPTEAQQAVGTYLINSAENTWFISIPGGRYILLKKRGFLGGGGFGLVYHVEHPTTGQPFALKIFVQRVLSNKEGDRVSDLIEDEFGVMKYFPPEWTPARMYSELRFMVPLLKLRVLGKPEFQDARNHLRIFSVCALFPKAQGDLEEAAA…	0	87.229	27	14	46	14	608	69	9.57	115.1	14	0.987	1.015	1.013	0.997	0.984	1.011	1.009	0.978	0.99	1	-0.02	0.02	0.02	0	-0.02	0.02	0.01	-0.03	-0.02	0	0.725774	0.699499	0.578127	0.449777	0.69361	0.736034	0.610984	0.428589	0.2454	0.998285	0.996674	0.994325	0.975418
FALSE	High	Master Protein	TGGT1_363030-t26_1-p1	transcript=TGGT1_363030-t26_1 | gene=TGGT1_363030 | organism=Toxoplasma_gondii_GT1 | gene_product=Protein kinase domain-containing protein [Source:UniProtKB/TrEMBL;Acc:A0A125YM50] | transcript_product=rhoptry protein ROP8 | location=AAQM03000199:1511-3196(+) | protein_length=561 | sequence_SO=contig | SO=protein_coding_gene | is_pseudo=false	MENCASVRSSSCLIWLAAAFFVSALGHVQQGAGVVRPRHWQNSEAAVSVRPPGGASPRHFHSPIEPVAFIDGEHVEDKHGGSWLEQEAAEEVTPLLNSHTETPTQSPSAFRRLLRRLRFWRRGRTGGSDGGGEPPQTPRPSLPTRLFQHLRRAAAAIPAAASRFFRRFRRVQEPVFPPDEFPEDVDTNPMYFRGTDPGDVVIEELFNRIPETSVWNENERVLSNANHLVSTALWRNEQSFRVESELGERPRTLVRGPVLRDDGSYICLEATDQETGEPLEVHVPYFTERPPSNAIKQLSEQVLRLRLLRGIKNQRQAKAYLRFIFPIDLVKDPKKRKMIRVRLDERDMWVLSRFFLYPRMQSNLHILGDVLLSHSSTHKSLVHHARLQLTLQLIRLAAS…	0	87.196	30	14	61	12	561	64	7.93	150.18	14	0.969	0.971	0.993	0.991	0.96	0.962	0.984	0.973	0.983	0.979	-0.05	-0.04	-0.01	-0.01	-0.06	-0.06	-0.02	-0.04	-0.02	-0.03	0.643575	0.641213	0.596145	0.680682	0.437645	0.41886	0.269694	0.190472	0.388228	0.294366	0.996674	0.990049	0.975418
FALSE	High	Master Protein	TGGT1_222380-t26_1-p1	transcript=TGGT1_222380-t26_1 | gene=TGGT1_222380 | organism=Toxoplasma_gondii_GT1 | gene_product=Importin N-terminal domain-containing protein [Source:UniProtKB/TrEMBL;Acc:A0A125YMQ8] | transcript_product=importin-beta N-terminal domain-containing protein | location=TGGT1_chrII:1069107-1078180(+) | protein_length=1147 | sequence_SO=chromosome | SO=protein_coding_gene | is_pseudo=false	MMDDAAQVQQLELLCQAFYGGGSKSEQNEAHQVLLPLASNPANVPRLQIILAKSNNLQALLFATAGLTNLFTKHWSQIPDPLKQDTRHFVLNYLYQRGADLLHNAPEILGHFVRLLCRVVKLSWLESVSNQKIVEQVNQFLTASTAHWVVGLSIYTELTQEMQPQMGRQMARLRRTAFSFRDTALLDIFKVAVQTLQQFHSGAIRVPNQQEEAQLLKQVLQLTHNCLSFDFLGTVPDDATDEQTTVMLPQSWTMLKDESFPKTLFELYELCWTSREGLLATTASASLGAAEENAGGGNGGAEMAGEAGAPSGAFPVHTPPQLRVDCAQLCLASLVLVAALRRSFFSRDQERADCLSQLILGTSRIIDKNLGLHNDMCYHEFCRLLGKINAANQLSELCT…	0	87.11	22	21	38	21	1147	129.4	6.42	112.85	21	0.917	0.995	0.945	1.073	0.985	1.068	1.014	1.016	1.039	1.03	-0.12	-0.01	-0.08	0.1	-0.02	0.09	0.02	0.02	0.05	0.04	0.0911258	0.899572	0.143112	0.327326	0.671031	0.521966	0.69012	0.572532	0.14877	0.560431	0.996674	0.998909	0.971021
FALSE	High	Master Protein	TGGT1_219710-t26_1-p1	transcript=TGGT1_219710-t26_1 | gene=TGGT1_219710 | organism=Toxoplasma_gondii_GT1 | gene_product=hypothetical protein | transcript_product=hypothetical protein | location=TGGT1_chrXII:634817-646431(-) | protein_length=1893 | sequence_SO=chromosome | SO=protein_coding_gene | is_pseudo=false	MGNEVASHQGASVSPSHAVRGLERSEKGDQRQDGAGLDFHPFLLPRRTMPCSTRSSLCSAELPAAAAVLNGQYPFLLFASADHLIPLEAAVANSLSSSACASTASSSSKDNTRKKEQRKKGGERGEAGEHGGEGEENPLLSLLSFDGSGSFPRTEAALDVSTYNVALLREALRAGPQGRTGREKGDSLLAWPSPFPAFLPPGRAIDTNQLFVAYAVKGGVRVMPIVGSADGGVEETYKAPLYVPPTLSAGPPQAKPSAVSVALYQGTKPQFLLVSDSNNLVSIFKLAPPVSAGSRGSSGGASSFLLLQLPKPEEPLAQVSSAGAASQSVSSASQSMSPIYVAWVPPAAGGLQEEAAQPGREQSCGLGSTDVYFVTVQRHQVILWSLPVLRSYCISKNIK…	0	87.063	15	23	34	23	1893	199.7	6.55	73.47	23	0.947	0.977	0.946	1.028	0.974	1.004	0.972	1.032	1.003	1.032	-0.08	-0.03	-0.08	0.04	-0.04	0.01	-0.04	0.05	0	0.05	0.238246	0.656706	0.362844	0.218189	0.258613	0.909362	0.471742	0.618057	0.909753	0.365752	0.996674	0.990049	0.971021
FALSE	High	Master Protein	TGGT1_263730-t26_1-p1	transcript=TGGT1_263730-t26_1 | gene=TGGT1_263730 | organism=Toxoplasma_gondii_GT1 | gene_product=Glycerol-3-phosphate dehydrogenase [Source:UniProtKB/TrEMBL;Acc:A0A125YIL0] | transcript_product=FAD-dependent glycerol-3-phosphate dehydrogenase | location=TGGT1_chrVIIb:330001-337948(-) | protein_length=653 | sequence_SO=chromosome | SO=protein_coding_gene | is_pseudo=false	MRRFGRVFACSAGLVGLGGAAAYGGLYYNHKKSMVPKETRYYSSLAGEAEGRLAHLPPSREAMIERMKKERFDLLVIGGGATGSGVALDAATRGLSCCLVERGDFADGTSSRSTKLIHGGVRYLEKAFEELDFRQLYLVWEALEERSHMLSAAPYMNHPLAILMPVYKYWQVPYFWAGVKVYGLLSKLVCCFETGVPPSSFFPAATSAFSFPLLPAAGLKGSLLYFDGQMNDSRMNLQLALTASLDGYVEGMKGACVGNHLNVVDILKDENGKAAGARVQDKETGEEFDIHSKTVVNCAGPFSDAVRTMADPTQPKLVEPAAGIHIVLPHWYTSASPYGLLLPKTTDGRVLFMLPWQGATIAGTTDAPCELSDAPQATEEEVAWVTRELASYLKMDEKR…	0	87.015	31	22	44	22	653	71.5	6.96	83.83	22	0.996	1.015	0.998	1.002	0.998	1.017	1	1.004	0.977	1.012	-0.01	0.02	0	0	0	0.02	0	0.01	-0.03	0.02	0.223757	0.553145	0.945797	0.933099	0.928059	0.0347891	0.986275	0.906223	0.118481	0.498707	0.996674	0.990049	0.992295
FALSE	High	Master Protein	TGGT1_214210-t26_1-p1	transcript=TGGT1_214210-t26_1 | gene=TGGT1_214210 | organism=Toxoplasma_gondii_GT1 | gene_product=PUA domain-containing protein [Source:UniProtKB/TrEMBL;Acc:A0A125YRK0] | transcript_product=rRNA pseudouridine synthase | location=TGGT1_chrX:6002905-6008379(-) | protein_length=505 | sequence_SO=chromosome | SO=protein_coding_gene | is_pseudo=false	MKEATSDPGLVASAGTEGGKKKKKTDNYAIEPNSSSPPIDTSKWPLLLKHYDRLNVRTGHYTPLPHGCSPLCRPLQQYINYGAMNLDKPANPSSHEVVAWLKKILRVEKTGHSGTLDPKVTGCLLVCINRATRLVKSQQSAGKEYVCIIRFHAKPESKAKVARALETLTGALFQRPPVVAAVKRQLRIRTIYASRLLDYDEQRHMAVFWAKCEAGTYIRTLCVHLGLVLGCGAHMQELRRVRSGNLGERDHLVTMHDVLDAMHVYDSTRDETYLRRTIFPLELLLTGFPRIVVKDSCVNAICYGAKLMIPGVLRFESGIEVHQEVVLMTTKGEAIALGVAQMTSSVIATVDHGVVSTVKRVLMDRDTYDMRWGYGPRASEKKKMILAGLLDKKGKPNEK…	0	86.95	34	17	38	17	505	56.7	9	110.79	17	1.018	1.001	1.015	0.959	0.976	0.96	0.974	0.989	0.972	0.985	0.03	0	0.02	-0.06	-0.03	-0.06	-0.04	-0.02	-0.04	-0.02	0.584179	0.960699	0.58464	0.254395	0.147859	0.0666954	0.608935	0.787675	0.0253941	0.713187	0.996674	0.998909	0.975418
FALSE	High	Master Protein	TGGT1_240810-t26_1-p1	transcript=TGGT1_240810-t26_1 | gene=TGGT1_240810 | organism=Toxoplasma_gondii_GT1 | gene_product=hypothetical protein | transcript_product=hypothetical protein | location=TGGT1_chrVI:1428984-1430684(+) | protein_length=566 | sequence_SO=chromosome | SO=protein_coding_gene | is_pseudo=false	MASSDSNAKLASQRLHSCAGGEESSGQCLEKQGAGARLRGWLAQLLPRADLPGARQKTPFNLNRYVLLLLYSIVVFTTGAVFYGWTALSAMIFKNDGFAYLCPKDASGVYVPDLRATQGKLYICDEQDAAVQKLYTMTFAVACLMSAGAGTLLDWLGPLWTELLGQLLNLVGWLFLAFSTVDRPLYYPALVFIGLGADASMLPTLCIRHLFPGSTGLIITILGSAASASFGIPLVLNTIVENHGVSVRDVSIGYCFFGPVLGVLVALLFMPRRGFALDDAGTIFREPDSGEGEGEAGPYALENGAQGGESQNAQETRRRKLLDPIVSSSFWTQFFSIRYFLIVLYFVVVSWATSYYQQAARRMFSEDVVSVIEVLLPLSFIPCILLGKVADVVGIIRVL…	0	86.909	28	13	34	13	566	61.2	5.3	102.64	13	1.005	1.001	1.025	1.029	1.034	1.03	1.055	1.059	1.054	1.044	0.01	0	0.04	0.04	0.05	0.04	0.08	0.08	0.08	0.06	0.404247	0.415815	0.412852	0.0198298	0.052476	0.00380469	0.22582	0.00802861	0.152572	0.162947	0.996674	0.990049	0.973444
FALSE	High	Master Protein	TGGT1_232080-t26_1-p1	transcript=TGGT1_232080-t26_1 | gene=TGGT1_232080 | organism=Toxoplasma_gondii_GT1 | gene_product=Chorein_N domain-containing protein [Source:UniProtKB/TrEMBL;Acc:S7WJ08] | transcript_product=hypothetical protein | location=TGGT1_chrVIII:1804634-1839298(-) | protein_length=10329 | sequence_SO=chromosome | SO=protein_coding_gene | is_pseudo=false	MLTNILDQLIKTYGHEFLGDWDPINNFRIDSLAEPEVHLTNIPFPQQLFDLAEIPFAVDYSNIAKVRAKFSWQTFFGSPSSNPFTIEAEDLEIRLRLLYPSEWDAEHWLAKVLKAKRKRIDLWQKFASLFSTSVPDKKSLTQTIEPRIVNALKIHVKNIHVHLVDDNIHQTPFGFEFKIDEFLIDSPHRGDPRLSEVESTGSENCLLMGLWMRFVGFHLWFREFPRPQLRWRSGPSAFVKKAQDLRRRLRKNRGDTEARRELNLLLNREAEEAGEADGSQVSSGEQETGAAGSGGEGSGGEAFAQSLSSKKSGLQGSSQSLDFADCKTDRRDEEEREAPQTDGASGTSAPDSDGRPGGEWRTAFRKSNTTLRRRAYNVAFSTDGESEGCRAWELETTPH…	0	86.556	3	29	33	29	10329	1099.9	8.46	58.06	29	1.076	1.017	0.95	0.986	1.061	1.003	0.937	1.029	0.949	0.978	0.11	0.02	-0.07	-0.02	0.09	0	-0.09	0.04	-0.08	-0.03	0.129674	0.780626	0.707888	0.80681	0.287413	0.512101	0.474511	0.39581	0.0920928	0.558878	0.996674	0.995152	0.980327
FALSE	High	Master Protein	TGGT1_223940-t26_1-p1	transcript=TGGT1_223940-t26_1 | gene=TGGT1_223940 | organism=Toxoplasma_gondii_GT1 | gene_product=GAP45 protein [Source:UniProtKB/TrEMBL;Acc:A0A125YXT6] | transcript_product=GAP45 protein | location=TGGT1_chrX:3344621-3345358(-) | protein_length=245 | sequence_SO=chromosome | SO=protein_coding_gene | is_pseudo=false	MGNACKKNTAKTPTRKEAEDLAEKERQEREAKEKAEAEEKARAEAEKNAADKAEAERRAAEAREREESARKEAEAEAARKAEAEAAEAERLRKEAEKKKAEEAKRKAEEEQRAAAEEAEQRAREEAERRKAEAAAAAERERQMQEALKQEEMSPREKYDKLASPEDSASETTMATQPQKVAEHSSAAVTDRSVVGYTVTPCDMAAIDETAKYLSKRCGCDLGDQHDENECPICRHIDLSDAPLLN	0	86.492	59	16	64	16	245	27.3	5.07	157.06	16	1.006	1.006	0.989	1.013	1.019	1.019	1.002	1.03	1.002	1.011	0.01	0.01	-0.02	0.02	0.03	0.03	0	0.04	0	0.02	0.800619	0.374489	0.540916	0.346717	0.350178	0.355825	0.7034	0.231502	0.840224	0.557218	0.996674	0.990049	0.973444
FALSE	High	Master Protein	TGGT1_232050-t26_1-p1	transcript=TGGT1_232050-t26_1 | gene=TGGT1_232050 | organism=Toxoplasma_gondii_GT1 | gene_product=J domain-containing protein [Source:UniProtKB/TrEMBL;Acc:S7V2Q7] | transcript_product=DnaJ domain-containing protein | location=TGGT1_chrVIII:1780837-1792241(-) | protein_length=869 | sequence_SO=chromosome | SO=protein_coding_gene | is_pseudo=false	MAKKGKPTASKAQNKIPPVSAPQPESSDEEVESFRKTAGPSVFTLVSGKTKEGKNRHTGRSGSRRTDGSPAFSDGEDAEESGDEMGTGSRASMAYDALRSGAHRSSPGPAGSPGEEARKRQGKREKAKNAPRSGKRKEKEEGFSLAGLKARLFDSSTPLRSRLLRWLVNACVALAIIGVFALKAAEEYYGQDEDTGGQQTEQHLAALQLDSGATEADIRKAYRTLSVRWHPDKNPGCAGCQARFTEVAVAYEYLMKAQKKKKESNGAGERERHRGDGEDALARTSKDIIDLTSLGPNDTFYPASGRHVWTIMLHNDKDEFSEHVMEMWEETALTLGKYFKYGVINVRKNKDLTKRLPVNIKIFPAILVMSSGMHPEVYPAITRPSVESIYSFIARSFPN…	0	86.481	29	19	37	19	869	96.1	6.52	100.64	19	0.976	0.99	1.004	1.064	1.037	1.053	1.068	1.042	1.032	1.031	-0.04	-0.01	0.01	0.09	0.05	0.07	0.09	0.06	0.04	0.04	0.428248	0.852161	0.710706	0.0366786	0.264005	0.409379	0.108368	0.567721	0.304219	0.36343	0.996674	0.996893	0.980327
FALSE	High	Master Protein	TGGT1_202680-t26_1-p1	transcript=TGGT1_202680-t26_1 | gene=TGGT1_202680 | organism=Toxoplasma_gondii_GT1 | gene_product=Putative peptidase M16, alpha subunit [Source:UniProtKB/TrEMBL;Acc:A0A125YN38] | transcript_product=putative peptidase M16, alpha subunit | location=TGGT1_chrVIIa:3006392-3012675(-) | protein_length=563 | sequence_SO=chromosome | SO=protein_coding_gene | is_pseudo=false	MNASILFRRNAPGVSTCLRRRCLRPAALAAASASGVSTPASGVWTPAFQRTEKRFLSGAALQPKAGPAPEYRRVPFVKEDMEKVMEEVPEFKYYYVGKENTKGNVYEGIPLDQSILEPADLRDYVPPHSNIQYSKLDNGLRIASMDRGGLTASLGLFVHAGTRFEDVTNFGVTHMIQNLAFASTAHLSLLRTVKTIEVLGANAGCVVGREHLVYSAECLRSHMPLLVPMLTGNVLFPRFLPWELKACKEKLIMARKRLEHMPDQMVSELLHTTAWHNNTLGHKLHCTERSLGHYNPDVIRHYMLQHFSPENMVFVGVNVNHDELCTWLMRAFVDYNAIPPSKRTVASPVYTGGDVRLETPSPHAHMAIAFETPGGWNGGDLVAYSVLQTILGGGGAFST…	0	86.4	26	13	55	13	563	62.1	8.32	155.6	13	1.003	1.017	1.006	0.999	1.002	1.015	1.005	1.01	1.013	1.013	0	0.02	0.01	0	0	0.02	0.01	0.01	0.02	0.02	0.48808	0.689602	0.772127	0.944716	0.898145	0.516321	0.190484	0.822729	0.0596676	0.415285	0.996674	0.993534	0.984106
FALSE	High	Master Protein	TGGT1_211690-t26_1-p1	transcript=TGGT1_211690-t26_1 | gene=TGGT1_211690 | organism=Toxoplasma_gondii_GT1 | gene_product=DRBM domain-containing protein [Source:UniProtKB/TrEMBL;Acc:S7UKM4] | transcript_product=AAA family protein | location=TGGT1_chrIV:1531700-1551811(-) | protein_length=1538 | sequence_SO=chromosome | SO=protein_coding_gene | is_pseudo=false	MSPPTNCLAVQLPLSSPSSASSSFFVAAPLRRGAIQRSASASQRPRFVSVLYRNAKLRASSFDARVKPLRLPLSLRSVLNLSSPDLARPASLFALSSAASCASQSRRLPHSPLSAGRWLSGPGFLASPLSVGKRLCSRLLGAAPSELFRGNMSGRGFAHGGSLDGGGSREPRSAALASADAQRAPASARRGRNFVAGRRGSQGFLKEGTAAFASLRNGPAASASPQASQQLTHSAGTPSLPRAQAATPHPAASSPLCASPPAASPSPAAEESVSLEKLFGGMGHPQFNKHIVDDENILHFYGIRQAVLRPVVHEDCSRGASAAHASSPPANSRRGKEPSQNQFFKATLSWTISGKRKIQTEGVGRSKKDAKKDAVKTLLSQLGPVTLHEYEQVTRCLFS…	0	86.153	17	23	37	23	1538	167.1	8.87	79.25	23	1.014	1.042	0.974	0.994	1.007	1.035	0.968	0.994	1.024	1.041	0.02	0.06	-0.04	-0.01	0.01	0.05	-0.05	-0.01	0.03	0.06	0.752378	0.280441	0.489605	0.617549	0.891181	0.437713	0.297557	0.855641	0.0830685	0.0591064	0.996674	0.989773	0.973444
FALSE	High	Master Protein	TGGT1_234505-t26_1-p1	transcript=TGGT1_234505-t26_1 | gene=TGGT1_234505 | organism=Toxoplasma_gondii_GT1 | gene_product=AA_TRNA_LIGASE_II domain-containing protein [Source:UniProtKB/TrEMBL;Acc:A0A125YPN5] | transcript_product=putative phenylalanyl-tRNA synthetase alpha chain A | location=TGGT1_chrX:4319172-4323950(+) | protein_length=525 | sequence_SO=chromosome | SO=protein_coding_gene | is_pseudo=false	MADVASAALMDDFLQVLNKEFGLQPVVSTLALAENSEYGGKFGAHEKIVGLVKSLQANEYVLGEQVEKTVWSLTEEGQLYAKEGSPEFRLVAWLQQRGNEEASLDVAAIKAGFGSEADVAVSNAMKMQWLRIDKATKLLHINKVPESDNVKTLLDVIQGQRDGNQDDAAALFKQLSELTATASPEKALQDLKKRKLVELRKVKYLKLQKGPKFSLHLMKPVADLTAELLIGDAWEKSNFKEYNFFAAGKRIRRGAVHPLMQVMKQFKQILYCMGFEEMPTNQYVESSFWCFDSLFMPQQHPARDVQDTFFLQAPKSSDATKIPQAYFNSVKNIHERGGHGSIGWQYEWSEEESMGNILRTHTTASSARMLYGLAQEYKKTGVFRPRKFFSIDRVFRNET…	0	86.059	34	14	41	14	525	59.3	7.4	132.79	14	1.051	1.04	1.033	1.023	1.074	1.064	1.056	1.079	1.05	1.03	0.07	0.06	0.05	0.03	0.1	0.09	0.08	0.11	0.07	0.04	0.237377	0.222431	0.327711	0.31633	0.263057	0.258131	0.323082	0.396251	0.340243	0.604088	0.996674	0.989773	0.971021
FALSE	High	Master Protein	TGGT1_261570-t26_1-p1	transcript=TGGT1_261570-t26_1 | gene=TGGT1_261570 | organism=Toxoplasma_gondii_GT1 | gene_product=60S ribosomal protein L7a [Source:UniProtKB/TrEMBL;Acc:A0A125YW74] | transcript_product=ribosomal protein RPL7A | location=TGGT1_chrVIIb:1628077-1630958(+) | protein_length=276 | sequence_SO=chromosome | SO=protein_coding_gene | is_pseudo=false	MASMKKGSAAAKGSSGGKKKLPAAPLAGKSGKKVQKSPIFAKTPRSFRVGGNIQPRRDLSRFVKWPKYILLQRQRRVLMQRLKVPPAINQFTHTLDKNQTSQLMRLLAKYKPETRAEKKQRLLQEAERQSAGGAAGGKKPVMIKYGINHVTDLIEIKKAKLVVIAHDVTPVELVCFIPQLCRKKEVPYCIVKGKSRLGQLVHQKNCPVLAIDNVRKEDQAELEAQCKIYRAMFNDNSEVRRRWGGGINGIKSQHAQQKKEKLINIELKKKMGLQLA	0	85.938	44	15	62	15	276	31	10.45	145.28	15	0.981	0.987	0.987	1.041	1.021	1.028	1.027	1.023	1.015	1.02	-0.03	-0.02	-0.02	0.06	0.03	0.04	0.04	0.03	0.02	0.03	0.39201	0.137497	0.249511	0.0369967	0.302722	0.118234	0.185283	0.322469	0.603796	0.245896	0.996674	0.989773	0.971021
FALSE	High	Master Protein	TGGT1_293690-t26_1-p1	transcript=TGGT1_293690-t26_1 | gene=TGGT1_293690 | organism=Toxoplasma_gondii_GT1 | gene_product=Profilin [Source:UniProtKB/TrEMBL;Acc:S7UIQ6] | transcript_product=profilin PRF | location=TGGT1_chrIa:496750-498091(-) | protein_length=165 | sequence_SO=chromosome | SO=protein_coding_gene | is_pseudo=false	MSDWDPVVKEWLVDTGYCCAGGIANVSAEDGVVFAAAADDDDGWSKLYKDDHEEDTIGEDGNACGKVSINEASTIKAAVDDGSAPNGVWIGGQKYKVVRPEKGFEYNDCTFDITMCARSKGGAHLIKTPNGSIVIALYDEEKEQDKGNSRTSALAFAEYLHQSGY	0	85.935	47	8	35	8	165	17.7	4.58	120.77	8	1.047	0.958	0.995	1.043	1.092	1	1.038	1.034	1	1.063	0.07	-0.06	-0.01	0.06	0.13	0	0.05	0.05	0	0.09	0.00616975	0.325634	0.962633	0.636431	0.411623	0.996584	0.26474	0.57275	0.981128	0.106898	0.996674	0.989773	0.992295
FALSE	High	Master Protein	TGGT1_257530-t26_1-p1	transcript=TGGT1_257530-t26_1 | gene=TGGT1_257530 | organism=Toxoplasma_gondii_GT1 | gene_product=Transporter, major facilitator family protein [Source:UniProtKB/TrEMBL;Acc:S7W7U8] | transcript_product=transporter, major facilitator family protein | location=TGGT1_chrVIIb:3924727-3926365(-) | protein_length=504 | sequence_SO=chromosome | SO=protein_coding_gene | is_pseudo=false	MESTEATMVERKAESPSSGDRARSIELAHQPTGAGASLSSFEVGGAKQGVNKAQDSAVNKGAANTPPRVAFGLSRYVVLVAYCLYCLLSGPSFMNWTTIADSLYKSGAFEWECKPGEIDTSVLPHEPKCPEQEVSVNHLFTVASCSYFVFAMLGGIMLDFAGPKFGALTGLACLITGWTLFGFSSESFRAYVPAMVFMGAGIDMAFFPCLCGANLFPGMVATIIAVYGSFRSISFIVGLSLRTIYINVEGATFRGVMLGYVGAGLGFCLLVALFIIPRRAWPAPDEAPSASAEQDVEAGADALAQKGEKNLTAIQSMKRDFLSLSFLPLFPYFVLVLITILFFAPSAKRLIPSAYEANQIISIFSFVPCIILGGIADRLGIVPVMMICNTCGLLSWILM…	0	85.813	24	8	48	8	504	54.5	6.71	90.75	8	1.058	1.071	1.084	0.941	0.995	1.008	1.02	1.063	0.992	0.947	0.08	0.1	0.12	-0.09	-0.01	0.01	0.03	0.09	-0.01	-0.08	0.230967	0.353448	0.271141	0.398192	0.87366	0.102832	0.216953	0.392715	0.718606	0.520554	0.996674	0.990049	0.971021
FALSE	High	Master Protein	TGGT1_222100-t26_1-p1	transcript=TGGT1_222100-t26_1 | gene=TGGT1_222100 | organism=Toxoplasma_gondii_GT1 | gene_product=hypothetical protein | transcript_product=hypothetical protein | location=TGGT1_chrII:851582-855004(-) | protein_length=1140 | sequence_SO=chromosome | SO=protein_coding_gene | is_pseudo=false	MVSCLHTKMMGPAPTAVRFCFGGLRQGFIFVLFTTFHWVVDLPASPVEGLSPIQKSFLVQFGRTEPSLDQSREGVVAAFKFESLRQVFQASRGEEFDNDTVRRTVLLGRQTFDSIMQQTLSQHSDNPTEARLHSGSGNHSPLPSFTIDSISTMTLGGIESLQFFCSVDRVEGSEDSAIRCIPQPQALPGSLRVGFIFQLLPSTDKVFTSQSSATSPPFCRIVHDSTRSEFPSFLDAAIGICAAFGYENQLIVQDGNPALDLLPDLYPEGLPSKGFESVPARYVKPYHSLSFVGLKPVDAVPSENHKHHSQADFLPNEELDTLSWRGVAVSSSVYEKALGRLKAAVRNAVISEATEVRDCTLHVGQPAQYEAVLKKVAGSACLPGKNFLQCLDAIRMGPY…	0	85.772	21	20	25	20	1140	128.1	6.32	73.94	20	1.013	1.028	1.003	0.964	0.976	0.991	0.967	0.938	0.987	0.974	0.02	0.04	0	-0.05	-0.03	-0.01	-0.05	-0.09	-0.02	-0.04	0.146061	0.68971	0.889881	0.394312	0.565366	0.787219	0.172316	0.0134122	0.0855632	0.451671	0.996674	0.993534	0.991016
FALSE	High	Master Protein	TGGT1_295040-t26_1-p1	transcript=TGGT1_295040-t26_1 | gene=TGGT1_295040 | organism=Toxoplasma_gondii_GT1 | gene_product=HEAT repeat-containing protein [Source:UniProtKB/TrEMBL;Acc:A0A125YVL7] | transcript_product=HEAT repeat-containing protein | location=TGGT1_chrIa:1332125-1343550(-) | protein_length=971 | sequence_SO=chromosome | SO=protein_coding_gene | is_pseudo=false	MATAGQTDEGDRASLQLMQQLLVSTLDPRQQVREQAEQQLVGARDGDFSLFLISLARVLDAQLSADPLQVQEQLLAKQIAAVTFKNCISAKDVVLDSAAADKWRAVAEAAKQAMRLQLLAAIKTEHIQVANAVCQVLSKIGRIELPGDGFPELLPFLLTLVTEATMTPEANAQADGVSVHRKVFGRNALTCLSYLCEEHADIVEETGEDPADVLSEAHCNNILTAVVQGMKDEDVQLKVAALKALYHALIFSKKNFENQTEREYIIQVVLENTKVAHQAVQVSAFECLVKVAEEYYSMLEPYMSGVGPLSWEALKSGDASVCIAAMELWNTIADVEIDIQQQEEEAAALGADGAESAVPRNCHIVKQALPFLLPILLNTLTQQDSEETDAADSWTAAMA…	0	85.529	21	19	32	19	971	104.5	4.75	83.43	19	1.001	1.033	1.026	1.02	1.021	1.053	1.046	1.009	1.022	1.036	0	0.05	0.04	0.03	0.03	0.07	0.06	0.01	0.03	0.05	0.841214	0.43914	0.477998	0.511773	0.56253	0.0804271	0.0486803	0.540411	0.138297	0.288342	0.996674	0.990049	0.973444
FALSE	High	Master Protein	TGGT1_313390-t26_1-p1	transcript=TGGT1_313390-t26_1 | gene=TGGT1_313390 | organism=Toxoplasma_gondii_GT1 | gene_product=Ribosomal protein RPL6 [Source:UniProtKB/TrEMBL;Acc:S7UT72] | transcript_product=ribosomal protein RPL6 | location=TGGT1_chrXI:3299999-3300967(+) | protein_length=322 | sequence_SO=chromosome | SO=protein_coding_gene | is_pseudo=false	MKVFVFQLYADACDCMRGCWGFCGLSGRREGRAVWFSRGECREIVKQLWVFFRLLRTVGQKCAFVWIVERLPTSSFFRRPSVLSPRSVACLSLRCISFPHSTRGCEHRVVTGSDLLFVAVSFRFAFPVKMAPTAAALAKKRLRTRKPKRQLYKSPAGAAKRMAKLRSSITPGTVLILLSGGHRGKRVVFLKQLAPSGLLLVTGPFKVNGVPLRRVNQRYVIATTTKVDISGVDVSSIKDEQFGASKKEKFAERKLRKKQDEGMFVQQSDSKAKQALPAQFKQLQDSVDKALLASLSKDKLLTQYLKTRFTLRGNMRPHEMKF	0	85.491	30	13	48	13	322	36.3	10.78	136.39	13	0.999	1.004	1.009	1.027	1.025	1.031	1.036	1.004	1.009	0.99	0	0.01	0.01	0.04	0.04	0.04	0.05	0.01	0.01	-0.01	0.903609	0.741413	0.0107779	0.594059	0.514606	0.622996	0.498603	0.952479	0.683363	0.684322	0.996674	0.995152	0.971021
FALSE	High	Master Protein	TGGT1_247470-t26_1-p1	transcript=TGGT1_247470-t26_1 | gene=TGGT1_247470 | organism=Toxoplasma_gondii_GT1 | gene_product=Nop domain-containing protein [Source:UniProtKB/TrEMBL;Acc:A0A125YGZ6] | transcript_product=putative nucleolar protein | location=TGGT1_chrXII:3291010-3295334(+) | protein_length=536 | sequence_SO=chromosome | SO=protein_coding_gene | is_pseudo=false	MAVNEIFLLFESAPGLLLARVKGWDQIAQDTDAVQEACLDFARFKQVVEAVAFHPFSDAEEAMEVQLAITNGTSCPALLNFLNFNLPSSLKKKKGADAEAGGRAKSQAAVGVCDPALGKSLADAGFQIVFNSNVQELHRGCRQHMKKLAKQLGELPIEKFQVGLGHSYSRSKMQEDPRKQDKPIMQSIALLDSLDKNINAFAMKLKEWYGWHFPELVKICGDAEVYCKVLKVVQMKEQFDEHTQGEELLEACGGSEEIRDEVVAATKHSMGQEIGEADFVNIIRFADQVLRLCEQRRTLQEYLSTKMDFVSPNLKAVVGEVLAARLISHAGALVNLAKYPASTIQILGAEKALFRALKSKNGRTPKYGLLFHSSFIGRVQKQQHRGRMSRYLASKCALA…	0	85.272	33	15	33	15	536	59.9	8.15	93.99	15	0.99	1.002	0.999	0.97	0.961	0.973	0.97	1.003	0.952	1.019	-0.01	0	0	-0.04	-0.06	-0.04	-0.04	0	-0.07	0.03	0.638704	0.959838	0.988093	0.656583	0.453102	0.279658	0.169693	0.856157	0.392707	0.359479	0.996674	0.998909	0.998911
FALSE	High	Master Protein	TGGT1_251690-t26_1-p1	transcript=TGGT1_251690-t26_1 | gene=TGGT1_251690 | organism=Toxoplasma_gondii_GT1 | gene_product=AA_TRNA_LIGASE_II domain-containing protein [Source:UniProtKB/TrEMBL;Acc:S7WG10] | transcript_product=putative seryl-tRNA synthetase, cytoplasmic | location=TGGT1_chrXII:5452731-5454179(+) | protein_length=482 | sequence_SO=chromosome | SO=protein_coding_gene | is_pseudo=false	MTIDVNLLRAEKGGDPALVRDSEVRRGRSGEVVDQAVAVDKKWRENLFQLEQLKKELNAVNKEIGQRKKKDAKDPCQDLLAKSAELKQRLPTIEAAATEAEEKRESLLHKIGNIVHKSVPVSNDEVNNQVVRTWGTFDRNLKIDGTPGRMHHHQILARLGGVDFKKGVEAAGHRGYFLKGAGMLLNLALAQYGLAFLLRKGYTPVQPPFFMRKEVMARAAELKDFEETLYRIPHNQTGSSADSKEGAEKNGEKKNEKDADRDDLFLIATSEQPLCSLHMNETLEEKELPIRYAGYSSCFRKEAGSHGKDCWGIFRIHQFEKVEQFCITTPEESWKMHEDMIGMAEEFYQTLELPYRVVSIVSGALNDAAAKKYDLEAWFPGYGDFRELVSCSNCTDYQA…	0	84.995	40	21	56	21	482	54.1	7.02	138.91	21	0.997	1.001	0.991	0.998	0.994	0.999	0.989	1.002	0.973	0.987	0	0	-0.01	0	-0.01	0	-0.02	0	-0.04	-0.02	0.880036	0.986611	0.587396	0.582037	0.767133	0.979876	0.426878	0.443807	0.547737	0.421822	0.996674	0.998909	0.975418
FALSE	High	Master Protein	TGGT1_291680-t26_1-p1	transcript=TGGT1_291680-t26_1 | gene=TGGT1_291680 | organism=Toxoplasma_gondii_GT1 | gene_product=Protein transport protein SEC23 [Source:UniProtKB/TrEMBL;Acc:S7VXH0] | transcript_product=Sec23/Sec24 trunk domain-containing protein | location=TGGT1_chrIX:4131104-4145209(-) | protein_length=791 | sequence_SO=chromosome | SO=protein_coding_gene | is_pseudo=false	MDVHEHEAATGCRFSWNVWPATRAEAQKIELPLGCMFTPLRDCTSLQLVEYEPVRCRVSGCILNPFCAIDFRSKQWTCPFSLQRNAFPNHYAMHISEQNLPAELLYPTIEYILPQPMPAANAPGVSAGESLPPPLFFLVVDTCVIEEELDQLRDSLMQALALMPSDAMVGIITYGAMAMLHELGGGSENVDVMKAHVFRGNKELTSTQIQQQLGLARSANAYVPAGGPGAPAGSPLLRPAAARFIQPVGECEYKLTSILEELRRDSWPVPSDSRPMRCTGLALSVALAVLEAAWYQLPARVLLFVGGACTSGPGQVVDLSLCESIRHHLDLQKDNNNARFVKKALKYYTQLANQAVRSGHAVDIFACSLDQVGLYEMKVMTEKTGGCVVMGDSFSINVF…	0	84.925	26	16	37	16	791	87.5	6.14	90.37	16	0.972	1.018	1.04	1.017	0.989	1.036	1.058	1.046	1.03	1.056	-0.04	0.03	0.06	0.03	-0.02	0.05	0.08	0.07	0.04	0.08	0.65545	0.694262	0.317248	0.753696	0.231518	0.132261	0.226116	0.236325	0.340047	0.305276	0.996674	0.993534	0.971021
FALSE	High	Master Protein	TGGT1_226410-t26_1-p1	transcript=TGGT1_226410-t26_1 | gene=TGGT1_226410 | organism=Toxoplasma_gondii_GT1 | gene_product=EF1_GNE domain-containing protein [Source:UniProtKB/TrEMBL;Acc:S7UX25] | transcript_product=EF-1 guanine nucleotide exchange domain-containing protein | location=TGGT1_chrX:1563878-1565889(-) | protein_length=328 | sequence_SO=chromosome | SO=protein_coding_gene | is_pseudo=false	MPACFCATSSPPGGRSTASVREGLCIPSSTALSVSPRGRSPLFPDGFTCTLLLVDRCPFVVLNLPLTPSLRDKSKHSHLPFTLLDKMVVPDFGNLKSDIGVGKLNEYLASRSFITGYSATQDDAIIFSKLLGAPNATKFVDASRWYRHVSHFSPVQKAAWPKGELSAEKPKKEEDDDDIDLFGEDDADKEAVKKLAESKKKEAAGKKKKEVINKSSLVIEVKPADAETSLDEISKLCKEIKIEGVTWGEAVKKVPVAFGLYKLQLCCTILDDIVNTNEIVDQIEALGMTQEQLEKLAKRQEGDDEEEDEDEETYGLVQSAEIVSFNKL	0	84.704	44	13	40	13	328	36	5.16	88.59	13	1.006	1.003	0.991	1.003	1.009	1.006	0.994	0.993	1	1.004	0.01	0	-0.01	0	0.01	0.01	-0.01	-0.01	0	0.01	0.887159	0.698178	0.837333	0.940576	0.131826	0.896804	0.251952	0.885593	0.972053	0.590858	0.996674	0.994325	0.984106
FALSE	High	Master Protein	TGGT1_249270-t26_1-p1	transcript=TGGT1_249270-t26_1 | gene=TGGT1_249270 | organism=Toxoplasma_gondii_GT1 | gene_product=putative protein disulfide isomerase-related protein (provisional) | transcript_product=putative protein disulfide isomerase-related protein (provisional) | location=TGGT1_chrXII:4348987-4354246(+) | protein_length=547 | sequence_SO=chromosome | SO=protein_coding_gene | is_pseudo=false	MAFTGARMRRGAPLSSLLCLAPGCTYTGKNSACRWTVDVCWALLVDFRKQVDDAAFALPRGNDALSARSFLPSLACLSCLVHTVDAETKTHVFLGCSPCLFSALEFKPPCGSRFLKVFKMALAQTQHLALLLAVLSVLTGAQAGLYAPNGPVKVLSGQQFKEQVVGSNDLFIVEFYADWCGHCQRFAPEFEKAAKALRGIVTLVAVSDQSAMGEYGVQGFPTVKAFVGRGGKPPKTFDYNQGRDAASLIEFAVMHAGKLARARLAGKIDAGTDAKPSEKAGSPEKETSDVIELTDGNFNQLVMKDDKSVWFVEFYAPWCGHCKALAPTWEEVATALKGKVKVGKVDATVEKVLASTYGIRGFPTLKLFPAGEKSVGLVKDYEGARTTEALLKYAMEFFS…	0	84.406	29	16	44	16	547	59.8	7.84	130.11	16	1.001	1.001	0.99	0.992	0.992	0.992	0.982	0.976	0.971	1.008	0	0	-0.02	-0.01	-0.01	-0.01	-0.03	-0.04	-0.04	0.01	0.981855	0.92497	0.233886	0.801071	0.898246	0.845916	0.641332	0.536104	0.304457	0.702058	0.999123	0.998909	0.971021
FALSE	High	Master Protein	TGGT1_214270-t26_1-p1	transcript=TGGT1_214270-t26_1 | gene=TGGT1_214270 | organism=Toxoplasma_gondii_GT1 | gene_product=Tr-type G domain-containing protein [Source:UniProtKB/TrEMBL;Acc:S7UR99] | transcript_product=putative translation initiation factor IF-2 | location=TGGT1_chrX:6085732-6096115(-) | protein_length=1146 | sequence_SO=chromosome | SO=protein_coding_gene | is_pseudo=false	MAPKKKGGRGGRRGGLSSDEEFEAKKPTPVPAADSTDSESSSEDSSEDERPRRGASRFALAVSSSESDSDSESESASGSESESGSESGSGSESGSEREDKSKAHDGKAAPKQAGRKVESSSSADEKEAESSDEESKNAKGGGKRKSERESDNSDEELKTKAQPSRPQGKAKASPKKAQGKGKKGKQVDDDDLDALLEEVGASVPGKAESPAVAEKGKKGKKDKKEADDLDDLLAELESPAKKGASPVAAAAASPVTVEKPAVSDEEAEGRGAAPGGLTKNQLKKQKKKQAAQKKVAQKKDDSDDETKPAPPAKKGPLSAAARAAQERLRLLKEEEERQKKEEEERKRQEEEQRKREEEEEKRRQEERALREQRRAERKQRLKEEGKLLSSKEKKERERQ…	0	84.313	23	21	35	21	1146	126.2	6.35	81.83	21	0.995	1.014	0.975	0.982	0.978	0.996	0.958	0.976	0.986	1.021	-0.01	0.02	-0.04	-0.03	-0.03	-0.01	-0.06	-0.04	-0.02	0.03	0.338602	0.125554	0.280058	0.248478	0.124575	0.521657	0.267167	0.326463	0.730981	0.150091	0.996674	0.989773	0.971021
FALSE	High	Master Protein	TGGT1_247510-t26_1-p1	transcript=TGGT1_247510-t26_1 | gene=TGGT1_247510 | organism=Toxoplasma_gondii_GT1 | gene_product=FBPase domain-containing protein [Source:UniProtKB/TrEMBL;Acc:A0A125YGG2] | transcript_product=fructose-bisphospatase II | location=TGGT1_chrXII:3317257-3321142(+) | protein_length=381 | sequence_SO=chromosome | SO=protein_coding_gene | is_pseudo=false	MRQCFIDEDFRLSLRFLATTSTVFFRRHCHTMAASGHPIPELGEFIIANKEKLRNTGQESEMNRLLTAIKLAAKVVNREINKAGLADILGAAGNQNVQGEEQQKLDVFANHKFIQALVNREVVCGICTEEDDDFIEVNRDAHFVMLMDPLDGSSNIDVNVSVGTIFSIYQRVSPLGSPPELRDFLQPGNAQIAAGYVLYGSSTMLVMTTGDGVNGFTLDPSLGTFFLSHRGMRFPEKARIYSVNEGNYKAFPDGVKKFLEECHDDKTGPFSLRYIGSLVSDFHRNLLQGGIYMYPPTKKDKKGKLRLLYEANPMAFLAEQAGGKATDGFDRIMDIQPSELHQRVPLMIGTARLVDRVDALMVEHSPECRLHANCLVGKNSS	0	84.296	34	11	42	11	381	42.4	6.61	122.65	11	0.996	0.962	0.977	1.004	1	0.966	0.981	1.011	0.99	0.989	-0.01	-0.06	-0.03	0.01	0	-0.05	-0.03	0.02	-0.01	-0.02	0.758459	0.192248	0.17881	0.868204	0.980512	0.121829	0.356155	0.078339	0.72631	0.696925	0.996674	0.989773	0.971021
FALSE	High	Master Protein	TGGT1_277720-t26_1-p1	transcript=TGGT1_277720-t26_1 | gene=TGGT1_277720 | organism=Toxoplasma_gondii_GT1 | gene_product=GDA1/CD39 (Nucleoside phosphatase) family protein [Source:UniProtKB/TrEMBL;Acc:S7V0B7] | transcript_product=GDA1/CD39 (nucleoside phosphatase) family protein | location=TGGT1_chrXII:6466417-6468990(+) | protein_length=857 | sequence_SO=chromosome | SO=protein_coding_gene | is_pseudo=false	MAEREAEDRLSSRRSLPFRVFSFSLLLLLFSKATWEEAAAVVLSGNGGRARDLDSDALGGSMRPEKVHRFRRSYETGGDLVSALELSFLDRAARSEQGEERASAPASPVSTLRTPLSGPVAALPFSHRQTQSLGHSNSLTPASHPHAHPAVSSYPDSSFPSSPPTFLSPSSSSPPSSFSSSSTTGASVSPLSSSSFVEGSYAEENDAALLSSLMEQAPVRPPEPRDSGGGRRVLEELMLSEVSCRQLTQAMIVVDGGSSKTLPSLFTAVTESCPQEGRRVLEGTLKFVGEGTKVAGVRDLLEDWLDAHAGKDWESRELDAQTLMRSFPSMQEQANKLVARLIQDIVALLNSRLSETEKEEVKALGVPVFFHTTAGVRGFPDWYRDGMFVALRRAINASP…	0	84.032	22	17	36	17	857	92.4	6.34	89.85	17	0.999	1.003	1.035	0.991	0.99	0.994	1.026	1.024	1.012	0.98	0	0	0.05	-0.01	-0.01	-0.01	0.04	0.03	0.02	-0.03	0.895569	0.43809	0.251768	0.75046	0.777847	0.806219	0.189242	0.682005	0.148284	0.0521284	0.996674	0.990049	0.971021
FALSE	High	Master Protein	TGGT1_286750-t26_1-p1	transcript=TGGT1_286750-t26_1 | gene=TGGT1_286750 | organism=Toxoplasma_gondii_GT1 | gene_product=MA3 domain-containing protein [Source:UniProtKB/TrEMBL;Acc:A0A125YUI3] | transcript_product=MA3 domain-containing protein | location=TGGT1_chrV:1543494-1550842(+) | protein_length=515 | sequence_SO=chromosome | SO=protein_coding_gene | is_pseudo=false	MASNKALGKKMSLLEEELRGPVKVMDTYDPIFDSESEDEDCLYTVIDVAADEYRQALNKTSCFSGATPPPQKSHLTLDEFTKLAKEILNSYFVNRETFDLSKALEELNCNQYLDSFLVLAIQSSLHRSTDEQRCISASLTLLVDKHIVSKQQMVRAFEKLIQSASDINVDSQLNPDRVYLFLDCAVLDGCVDESYVRRLPEKFLAALSRETLEGNRHLVDALRNLKSFKEAVRNFLPDFFNSGSVEEMKIFLDEQRQPLLQHEFVKMVVESAFSKENEHREMVSNALDRLYGKVLKPDDIQLAFARLVGDVDDYSLDNPDVYYLLAKFLARAVADEILPPSFLLDRYRLNYGGDAGVQVLKKVQKWLAEQNGKGISVRLRKVWTGTDPDNAEACEFKAR…	0	84.024	38	21	43	21	515	58.9	5.03	93.51	21	0.997	0.984	0.994	0.993	0.99	0.977	0.987	1.003	1.001	0.997	0	-0.02	-0.01	-0.01	-0.02	-0.03	-0.02	0	0	0	0.944102	0.668112	0.496763	0.678703	0.737827	0.368869	0.612993	0.689667	0.967746	0.952786	0.99837	0.991158	0.973444
FALSE	High	Master Protein	TGGT1_232600-t26_1-p1	transcript=TGGT1_232600-t26_1 | gene=TGGT1_232600 | organism=Toxoplasma_gondii_GT1 | gene_product=PNPLA domain-containing protein [Source:UniProtKB/TrEMBL;Acc:S7V2V6] | transcript_product=phospholipase, patatin family protein | location=TGGT1_chrVIII:2182196-2184854(+) | protein_length=665 | sequence_SO=chromosome | SO=protein_coding_gene | is_pseudo=false	MMKGNSVSLRSLSLCLLFSLLLFSFCMDTRSSATDGADKAESAVSAAPESAEEPSGEDASESSLGEDEEDSEEEDENEDEDFSSLFGSLGGGGFGRGLDNLQGMSGLFDNLGTDSDGEHKLGNLASLLPNLGMIGKGGGDGKEELAELLSKASAQQNSGTNQVSPDFVNQIFSMLSKNNTALNDIMSEFMQDPYMDIKETERPKIDPEVFANPPAQTDNAAGNAKDGETPESSPAEAYASDAATADGPEEIILSKIKKFVKKPGDRDADNAAADPFAETNDAGVCHILVLSGGGARSAFQAGGIVGLAEQYKAQGRELKWDVVTGVGFGGVQAAFGLPFKPGHNGELDYGESLWRFWQGLKKEDILKCENGMKDLMDIRATMQWIQKSQKYASNVAKLL…	0	83.87	25	16	36	16	665	70.7	4.58	92.65	16	0.957	0.972	0.973	1.008	0.965	0.98	0.981	1.011	0.996	1.009	-0.06	-0.04	-0.04	0.01	-0.05	-0.03	-0.03	0.02	-0.01	0.01	0.0567713	0.259106	0.646451	0.728229	0.352559	0.181095	0.597324	0.821258	0.800345	0.798868	0.996674	0.989773	0.975418
FALSE	High	Master Protein	TGGT1_318510-t26_1-p1	transcript=TGGT1_318510-t26_1 | gene=TGGT1_318510 | organism=Toxoplasma_gondii_GT1 | gene_product=Vesicle-fusing ATPase [Source:UniProtKB/TrEMBL;Acc:A0A125YPA5] | transcript_product=putative N-ethylmaleimide-sensitive fusion protein | location=TGGT1_chrIV:1205264-1217814(-) | protein_length=751 | sequence_SO=chromosome | SO=protein_coding_gene | is_pseudo=false	MAFVLTTVKLPSKDVAFTNCAYVNPRVYATLRQTAASSGDVSGNAILCEVKNIVVSVMPDGLLQENEIGLNTCQRESARIQLRDEVALRPFQLPADREHLYQIGVMQVEVSTYLKPESRIVVHDDKLEEEFRSLFCRQIFTQHQSVAMKLDERQALKMTVKEMLPFEGTSRQSSRLLTRGQLTEKTQVLFVGADDGRVCVQSRRMLQRNILTPDFNFEELGIGGLDKEFNEIFRRAFASRIFPPAIVQEMGIKHVRGMLLYGPPGTGKTLIARQIGKSLRAREPVIVNGPEILNKYVGQSEENIRNLFKAAEDEYRKLGDNASLHIIIFDEIDAICKQRGSNPSSAGVNDSIVNQLLSKIDGVEALNNILLIGMTNRLDMIDEALLRPGRLEVHIEIGL…	0	83.852	29	18	31	18	751	83.4	6.51	68.47	18	0.992	1.026	1.022	0.964	0.956	0.989	0.985	1.028	0.977	0.994	-0.01	0.04	0.03	-0.05	-0.06	-0.02	-0.02	0.04	-0.03	-0.01	0.866709	0.642645	0.540905	0.657298	0.304617	0.686955	0.752175	0.562972	0.672247	0.916856	0.996674	0.990049	0.973444
FALSE	High	Master Protein	TGGT1_209150-t26_1-p1	transcript=TGGT1_209150-t26_1 | gene=TGGT1_209150 | organism=Toxoplasma_gondii_GT1 | gene_product=Pyr_redox_2 domain-containing protein [Source:UniProtKB/TrEMBL;Acc:S7VS32] | transcript_product=non-proton pumping type-II NADH dehydrogenase I | location=TGGT1_chrIb:1092807-1095489(+) | protein_length=618 | sequence_SO=chromosome | SO=protein_coding_gene | is_pseudo=false	MAGQWLRLLAGASVPMLSLPARCDSPASPSSPSSPKERVSALLAQPPRPFSAFSPVSTWMSTKWTSFRLRTGLLSPAAVAASAVASASPAAREAPARRQKVVVVGSGWAAVSFLADLDMTRYEPVVISPRDYFTFTPLLPSVCVGTLPASACMTGVRELLVRGGVPCGSFYEGRVAEICPTEKKVRCQSTHGKAQDAREWEESYDYLVVAAGADVNTFGVPGVKENAFFVKELEDARRLRSALFDVIETASVPGVSEEEKKKLLHFVVVGAGPTGVEVAAEIDDFFQAEGATHFPQLRPLVRITVVEMLPTVLAAYNNDVQAFAKRLLEENPRVDLCLQSQVVGVGPDSVKVRTKRADGQVEEKEMPCGLLVWASGIKSPKVCLDLARKTAELREAQQQ…	0	83.809	35	19	41	19	618	67	8.32	107.14	19	1.006	1.029	1.035	0.933	0.939	0.961	0.966	0.971	0.961	0.939	0.01	0.04	0.05	-0.1	-0.09	-0.06	-0.05	-0.04	-0.06	-0.09	0.78194	0.298111	0.0787679	0.405208	0.313821	0.469268	0.591548	0.639061	0.565845	0.450131	0.996674	0.989773	0.971021
FALSE	High	Master Protein	TGGT1_248740-t26_1-p1	transcript=TGGT1_248740-t26_1 | gene=TGGT1_248740 | organism=Toxoplasma_gondii_GT1 | gene_product=hypothetical protein | transcript_product=hypothetical protein | location=TGGT1_chrXII:4066708-4074096(-) | protein_length=1283 | sequence_SO=chromosome | SO=protein_coding_gene | is_pseudo=false	MENTEREDAPREATPATPAVPETAQNAIASASATAGEPSARSESKPLVLEVRGFLEVVDVKGPPNLNIRSVSVAGVPRRQLSNSAAREATAVKSATPQRVGSKAEVKKEDGKETRQLISKARPAPKQIEAAAPDAQASAPAAKPKLLVKKAAPTPKAAEEKQEKKQDTQIEEKKEGEKDAKKVEAVRKVPLVNKAPAKATAAKQEEKKAEEDVKEAAKPDPVKKVLVVKKAPPKAMAAKKEEKTEEKEAKKEEAKKEEAKKEDEKKEEEKKEEAKKEDEKKEDEKKDEAKKEEAKKEEKTEEKEAKKEEEKKEEAKKEDEKKDEAKKGEVKQEEAKKEEVKQEEAKKEEAKKEEAKKEEVKQGEEKKEEEKKKDDKELKKAESLKKVVLVKKAAPKVMV…	0	83.793	19	25	48	25	1283	140	8.44	106.11	25	1.025	1.018	1.002	0.996	1.021	1.014	0.998	1.018	0.989	0.994	0.04	0.03	0	-0.01	0.03	0.02	0	0.03	-0.02	-0.01	0.243197	0.01356	0.885872	0.940267	0.649644	0.802278	0.96593	0.741231	0.850753	0.891721	0.996674	0.989773	0.991016
FALSE	High	Master Protein	TGGT1_410370-t26_1-p1	transcript=TGGT1_410370-t26_1 | gene=TGGT1_410370 | organism=Toxoplasma_gondii_GT1 | gene_product=Putative transmembrane protein [Source:UniProtKB/TrEMBL;Acc:S7VU98] | transcript_product=putative transmembrane protein | location=AAQM03000265:733-2584(+) | protein_length=435 | sequence_SO=contig | SO=protein_coding_gene | is_pseudo=false	MWRIWRCRLSFLFATGCLLGALTAGLGSQMSDSVGRNVQAPAGVADASQEAGDVVEERTESTEEQAFALGPPRRHSSESLFPRNASVTARRRRNRRIALIATAVGVAVILAALYVLRRRRAQPPQEPEPPTRPRTPRPRAPSEQQQPSESERPAGVPMKPGSLTLPFTCLGDTKVTFFGPSGRQHGFTPLYDPSPSKRVATVDAGTNRLFIGGGGMNGEFANTIIEEARRNRIPLTATELSAESQEIQERLLHDAERRPGTLVEIDSGRFSRVFARSFAYVAIIPSAVWDESETGKNVGATFLHILKPEVTPHGNEMNDVMLYTVAPFGNASDSAYNMAYKATMLGIVGAVSEYNKTPWGEVKPVEAIRLPLLGAGHFRGHRSLDSIGRANAAAVEAAI…	0	83.706	41	13	34	4	435	47.7	9.19	111.63	13	0.974	0.998	1.023	1.033	1.007	1.031	1.057	0.977	0.991	1.034	-0.04	0	0.03	0.05	0.01	0.04	0.08	-0.03	-0.01	0.05	0.143749	0.967498	0.357559	0.764368	0.944734	0.605791	0.573853	0.566865	0.796843	0.297867	0.996674	0.998909	0.971021
FALSE	High	Master Protein	TGGT1_295125-t26_1-p1	transcript=TGGT1_295125-t26_1 | gene=TGGT1_295125 | organism=Toxoplasma_gondii_GT1 | gene_product=Protein kinase domain-containing protein [Source:UniProtKB/TrEMBL;Acc:S7UI50] | transcript_product=rhoptry protein ROP4 | location=TGGT1_chrIa:1394541-1396277(-) | protein_length=365 | sequence_SO=chromosome | SO=protein_coding_gene | is_pseudo=false	MGHPTSFGQPSCLVWLAAAFLVLGLCLVQQGAGIQRPHQWKSSEAALSVSPAGDIVDKYSRDSTEGENTVSEGEAEGSRGGSWLEQEGVELRSPSQDSQTGTSTASPTGFRRYLRFLAPFDLVTIPGKPLVQKAKSRNEVGWVKNLLFLLPPTHVDMETFVDEIGRFPQEDRPLADAARLYLTVQAVRLVAHLQDEGVVHGKIMPDSFCLKREGGLYLRDFGSLVRAGAKVVVPAEYDEYTPPEGRAAARSRFGSGATTMTYAFDAWTLGSVIFLIWCSRAPDTKSGYEYSVEFFFSRCRRVPENVKLLVYKLINPSVEARLLALQAIETPEYREMEEQLSAASRLYSGDGTLTGGDDDMPPLET	0	83.489	45	12	55	7	365	40.1	5.3	159.43	12	0.982	0.947	0.941	1.055	1.036	0.998	0.992	1.024	1.022	1.027	-0.03	-0.08	-0.09	0.08	0.05	0	-0.01	0.03	0.03	0.04	0.777629	0.254575	0.290031	0.367682	0.244727	0.909229	0.356836	0.435253	0.0421595	0.545779	0.996674	0.989773	0.971021
FALSE	High	Master Protein	TGGT1_221210-t26_1-p1	transcript=TGGT1_221210-t26_1 | gene=TGGT1_221210 | organism=Toxoplasma_gondii_GT1 | gene_product=Peptidyl-prolyl cis-trans isomerase [Source:UniProtKB/TrEMBL;Acc:A0A125YG57] | transcript_product=cyclophilin | location=TGGT1_chrII:118956-120827(+) | protein_length=179 | sequence_SO=chromosome | SO=protein_coding_gene | is_pseudo=false	MKLVLFFLALAVSGAVAENAGVRKAYMDIDIDGEHAGRIILELREDIAPKTVKNFIGLFDKYKGSVFHRIIPDFMIQGGDFENHNGTGGHSIYGRRFDDENFDLKHERGVISMANAGPNTNGSQFFITTVKTEWLDGRHVVFGKITTESWPTVQAIEALGGSGGRPSKVAKITDIGLLE	0	83.363	59	11	49	10	179	19.6	6.54	123.79	11	1.057	1.036	0.997	0.982	1.039	1.017	0.979	0.95	0.996	1.036	0.08	0.05	0	-0.03	0.05	0.03	-0.03	-0.07	-0.01	0.05	0.29442	0.188339	0.805188	0.68308	0.0889726	0.58058	0.525039	0.386817	0.209654	0.104519	0.996674	0.989773	0.984106
FALSE	High	Master Protein	TGGT1_206470-t26_1-p1	transcript=TGGT1_206470-t26_1 | gene=TGGT1_206470 | organism=Toxoplasma_gondii_GT1 | gene_product=Dihydrolipoyl dehydrogenase [Source:UniProtKB/TrEMBL;Acc:A0A125YH62] | transcript_product=pyruvate dehydrogenase complex subunit PDH-E3II | location=TGGT1_chrVIIa:922416-929013(+) | protein_length=519 | sequence_SO=chromosome | SO=protein_coding_gene | is_pseudo=false	MKAAVFRNLAVAWRPAGSSPLLSQKNQGLSFSLLPSAVQRRGFASAGGKYDVVVVGGGPGGYVAAIKAAQLGLKTACVEKRGTLGGTCLNVGCIPSKAVLNISNKYVDARDHFERLGIKIDGLSIDIDKMQKQKQKVVSTLTQGIEHLFRRNGVDYYVGEGKLTDSNSVEVTPNGKSEKQRLDAGHIILATGSEASPLPGNVVPIDEKVIISSTGALALDKVPKRMAVIGGGVIGLELGSVWRNLGAEVTVVEFLDRLLPPVDGEVAKAFQKEMEKTGIKFQLGTKVVGADVRESSATLHVEPAKGGNPFDMEADVVLVAVGRRPYTKNLGLEELGIETDRVGRVVVDDRFCVPNYPNIRAIGDLIRGPMLAHKAEEEGIACVEMIAGVGEGHVNYETI…	0	83.33	38	16	28	16	519	55.1	7.03	80.94	16	1.032	1.032	0.995	1.003	1.035	1.035	0.999	1.036	1.018	1.044	0.04	0.05	-0.01	0	0.05	0.05	0	0.05	0.03	0.06	0.117731	0.162683	0.764864	0.850522	0.337892	0.366752	0.528599	0.36358	0.757036	0.180951	0.996674	0.989773	0.983537
FALSE	High	Master Protein	TGGT1_312110-t26_1-p1	transcript=TGGT1_312110-t26_1 | gene=TGGT1_312110 | organism=Toxoplasma_gondii_GT1 | gene_product=Thioredoxin domain-containing protein [Source:UniProtKB/TrEMBL;Acc:S7UTI6] | transcript_product=apicoplast-associated thioredoxin family protein Atrx1 | location=TGGT1_chrXI:2396639-2404968(-) | protein_length=790 | sequence_SO=chromosome | SO=protein_coding_gene | is_pseudo=false	MRHGPCFTCTHKFSCPSFLRNGVVSALALLFPKTAAVVESLSSPVSVSMAPDSCRPDPVGAPNGRGSLKEVSSSFCTTSSLFSRLSLLFLLFSLFASPRQLSLTSAISLEPSPGSPAAAQVSSGVAPKPVEKESGNGGQVKVHLKRDEAGRPLPVSAASLFAAEKPHEEEEREVLRVGVDAGDSRREKRAVEPTRMLASIDPQHPSVSAQVVSPPPSSSLTAPPTARPRDEGNNTCVRNNETCQRRERYAEKSIQRHRHDSTSSRESVAFASFGSSKNSFATAYAPFDDEDEEGALAHLKNKVKTAVSCPAAKILLGISGVVALGTLGIKYTRNVLRRRRREGLQRPPTPFTDLLGHVLLKRERGKHAAETRELATGDVLGKPGSVTALYFSGRGVEEM…	0	82.984	20	13	28	13	790	86.9	7.81	71.62	13	0.963	0.992	0.964	1.025	0.987	1.017	0.989	1.003	1.031	1.038	-0.05	-0.01	-0.05	0.04	-0.02	0.02	-0.02	0	0.04	0.05	0.173619	0.328141	0.260317	0.164496	0.595914	0.0695568	0.698511	0.944206	0.18431	0.176417	0.996674	0.989773	0.971021
FALSE	High	Master Protein	TGGT1_270250-t26_1-p1	transcript=TGGT1_270250-t26_1 | gene=TGGT1_270250 | organism=Toxoplasma_gondii_GT1 | gene_product=Dense granule protein GRA1 [Source:UniProtKB/TrEMBL;Acc:A0A125YRV6] | transcript_product=dense granule protein GRA1 | location=TGGT1_chrVIII:5308049-5308756(-) | protein_length=190 | sequence_SO=chromosome | SO=protein_coding_gene | is_pseudo=false	MVRVSAIVGAAASVFVCLSAGAYAAEGGDNQSSAVSDRASLFGLLSGGTGQGLGIGESVDLEMMGNTYRVERPTGNPDLLKIAIKASDGSYSEVGNVNVEEVIDTMKSMQRDEDIFLRALNKGETVEEAIEDVAQAEGLNSEQTLQLEDAVSAVASVVQDEMKVIDDVQQLEKDKQQLKDDIGFLTGERE	0	82.713	36	8	70	8	190	20.1	4.28	161.71	8	1.121	1.093	1	1.07	1.199	1.17	1.07	1.018	1.075	1.029	0.16	0.13	0	0.1	0.26	0.23	0.1	0.03	0.1	0.04	0.12213	0.328456	0.994752	0.424654	0.108044	0.372339	0.0269301	0.919459	0.410828	0.604074	0.996674	0.989773	0.999286
[truncated: 5,025 more rows]
[truncated: 123 more columns]
