# Supplementary material for: Analysis of CDPK1 targets identifies a trafficking adaptor complex that regulates microneme exocytosis in Toxoplasma
Source: eLife. 2023 Nov 7;12:RP85654. doi: 10.7554/eLife.85654 (PMC10629828; doi:10.7554/eLife.85654)
Supplement: Supplementary file 4. [file elife-85654-supp4.xlsx]

## Sheet: 4_DMSO_proteome_RAW
Checked	Protein FDR Confidence: Combined	Master	Accession	Description	Sequence	Exp. q-value: Combined	Sum PEP Score	Coverage [%]	# Peptides	# PSMs	# Unique Peptides	# AAs	MW [kDa]	calc. pI	Score Sequest HT: Sequest HT	# Peptides (by Search Engine): Sequest HT	Abundance Ratio: (IAA, 9) / (IAA, 0)	Abundance Ratio: (IAA, 30) / (IAA, 0)	Abundance Ratio: (IAA, 300) / (IAA, 0)	Abundance Ratio: (IAA, 0) / (PBS, 0)	Abundance Ratio: (IAA, 9) / (PBS, 0)	Abundance Ratio: (IAA, 30) / (PBS, 0)	Abundance Ratio: (IAA, 300) / (PBS, 0)	Abundance Ratio: (PBS, 9) / (PBS, 0)	Abundance Ratio: (PBS, 30) / (PBS, 0)	Abundance Ratio: (PBS, 300) / (PBS, 0)	Abundance Ratio (log2): (IAA, 9) / (IAA, 0)	Abundance Ratio (log2): (IAA, 30) / (IAA, 0)	Abundance Ratio (log2): (IAA, 300) / (IAA, 0)	Abundance Ratio (log2): (IAA, 0) / (PBS, 0)	Abundance Ratio (log2): (IAA, 9) / (PBS, 0)	Abundance Ratio (log2): (IAA, 30) / (PBS, 0)	Abundance Ratio (log2): (IAA, 300) / (PBS, 0)	Abundance Ratio (log2): (PBS, 9) / (PBS, 0)	Abundance Ratio (log2): (PBS, 30) / (PBS, 0)	Abundance Ratio (log2): (PBS, 300) / (PBS, 0)	Abundance Ratio P-Value: (IAA, 9) / (IAA, 0)	Abundance Ratio P-Value: (IAA, 30) / (IAA, 0)	Abundance Ratio P-Value: (IAA, 300) / (IAA, 0)	Abundance Ratio P-Value: (IAA, 0) / (PBS, 0)	Abundance Ratio P-Value: (IAA, 9) / (PBS, 0)	Abundance Ratio P-Value: (IAA, 30) / (PBS, 0)	Abundance Ratio P-Value: (IAA, 300) / (PBS, 0)	Abundance Ratio P-Value: (PBS, 9) / (PBS, 0)	Abundance Ratio P-Value: (PBS, 30) / (PBS, 0)	Abundance Ratio P-Value: (PBS, 300) / (PBS, 0)	Abundance Ratio Adj. P-Value: (IAA, 9) / (IAA, 0)	Abundance Ratio Adj. P-Value: (IAA, 30) / (IAA, 0)	Abundance Ratio Adj. P-Value: (IAA, 300) / (IAA, 0)
FALSE	High	Master Protein	TGGT1_306060-t26_1-p1	transcript=TGGT1_306060-t26_1 | gene=TGGT1_306060 | organism=Toxoplasma_gondii_GT1 | gene_product=Rhoptry neck protein RON8 [Source:UniProtKB/TrEMBL;Acc:A0A125YNG1] | transcript_product=rhoptry neck protein RON8 | location=TGGT1_chrIX:5560917-5575203(-) | protein_length=2980 | sequence_SO=chromosome | SO=protein_coding_gene | is_pseudo=false	MVATTLHSLPSRYLYTLLMSFLFVCGALALHESPDGLPEAPDRPQNAESGDGPPTLVLTLDPEYAGKSEEFAFTAEYFPPTESSKNEDGAQQSFVETPNRRLPGAFDPMSSSDVRSEVQLRVTTQQMERGLLAEIVVLQEGQMVSGFRASLQTKEQAALLHRLADLTNDPNIHFRVEWRGRGDGTGGLYIRTAVHLLATAYKPSVHFKLNLHQTGARGARETIKLLSSVPIDDLNAPGVDIGTLKQLIVDHAEPENILTGPGSFSIKRMYKESDPKNANTQEATLVPWLLRLLDLASPVTIVGDLTRNREFSTVLPQGPANWNDLLLLYTGMGDAANRGQNAPDFAQREPGYRPGSIFLSPDGFRGAAHLGDHQPDRLKQFWRQGGETGLNPGDIEHYY…	0	401.496	34	86	213	86	2980	328.8	8.4	581.41	86	1.031	1.021	1.048	0.96	0.99	0.98	1.006	1.006	1	1	0.04	0.03	0.07	-0.06	-0.02	-0.03	0.01	0.01	0	0	0.538775	0.659369	0.381736	0.380794	0.360554	0.241017	0.388102	0.0437159	0.987604	0.658146	0.889498	0.902448	0.922119
FALSE	High	Master Protein	TGGT1_253750-t26_1-p1	transcript=TGGT1_253750-t26_1 | gene=TGGT1_253750 | organism=Toxoplasma_gondii_GT1 | gene_product=PLU-1 domain-containing protein [Source:UniProtKB/TrEMBL;Acc:S7ULT6] | transcript_product=PLU-1 family protein | location=TGGT1_chrIII:1126566-1154665(-) | protein_length=8088 | sequence_SO=chromosome | SO=protein_coding_gene | is_pseudo=false	MSGRGAAASAAGKPGGDGGKPSGEDLAATVPEAAPSARPYMRVLGPASSRGGSNKSVRVDALTYQTWTNPYLPAGASAQELREEAEEALAAEADFDRQLLALDARLGTAREAKGTEQEAEGAEAECVRYGSEGEDGPGSAANTEGIDGGERMSHPETLQGPSKAEDAEETPKASEEGQVEAVARGHTAAHASVEEDGDDERAEAGGSSSRDRSPEGGWMPRSEDEAQNEDSQPLKTDDQGQSTPASRLHKQRPSREEGGDSGALASFHDAAVSTEEKSDGDTEEFRRRVKAESPVSAGLSPAPSSDQETSQGPDESREGSMGFLSWMKVPSSRGAPRQSVSPSGQRAVDSAASLPAPLSPIAVPVAQLVTPMPFKVFDSAPFLMRRAASPAGGKRNAGF…	0	344.801	15	96	130	96	8088	855.8	5.87	310.71	96	0.968	0.952	0.968	1.023	0.99	0.974	0.99	0.981	0.98	0.975	-0.05	-0.07	-0.05	0.03	-0.01	-0.04	-0.01	-0.03	-0.03	-0.04	0.684294	0.582416	0.733822	0.805528	0.501323	0.168414	0.130228	0.149408	0.269526	0.540535	0.889498	0.902448	0.923577
FALSE	High	Master Protein	TGGT1_311470-t26_1-p1	transcript=TGGT1_311470-t26_1 | gene=TGGT1_311470 | organism=Toxoplasma_gondii_GT1 | gene_product=Rhoptry neck protein RON5 [Source:UniProtKB/TrEMBL;Acc:S7W8Q7] | transcript_product=rhoptry neck protein RON5 | location=TGGT1_chrXI:2047692-2067010(-) | protein_length=1699 | sequence_SO=chromosome | SO=protein_coding_gene | is_pseudo=false	MAEFTWRPLLMSLPKMIAFFHILLFSGALAAAAGSPAADLVASVQTVSNERKDLYARDTQPTARTGIDIGVSFTQQASGNARTFEIRQHGSGPPRPAPRRAAAVADDIFGSEDFSPPPMNVAGAPLRDMGVHFLECQATDGKIECTGQGAGARPPFFRGGVDPTEIHEIVQSRTVGPADYDEERPEQTPDYLSPTDVVTLQRFVSSANASNSPLLEDPVQVCLSRRKPTYTCHLLHEFAATSVIVEESGNLVCEDKAPLTVAEKRKINDAVKAGRTPQATGGQSSRPPNPTVSPSKAGAAPQNAASRQPVSFVEQENNEASMPTANTEQASATTEDTKIASAATDSGDYGEAAAGESAQEGDRPPPYNPDADEAGVPRAVQEAYEEARPLQEATIDKFK…	0	342.505	43	56	170	56	1699	186.9	8.46	531.73	56	1.005	1.011	1.004	0.994	0.999	1.005	0.998	1.006	1.014	1.002	0.01	0.02	0.01	-0.01	0	0.01	0	0.01	0.02	0	0.830313	0.763792	0.934571	0.811047	0.614963	0.652829	0.924506	0.442051	0.36074	0.944922	0.925148	0.91214	0.975951
FALSE	High	Master Protein	TGGT1_295710-t26_1-p1	transcript=TGGT1_295710-t26_1 | gene=TGGT1_295710 | organism=Toxoplasma_gondii_GT1 | gene_product=HECT-domain (Ubiquitin-transferase) domain-containing protein [Source:UniProtKB/TrEMBL;Acc:S7UJ61] | transcript_product=HECT-domain (ubiquitin-transferase) domain-containing protein | location=TGGT1_chrIa:1556788-1587317(-) | protein_length=8007 | sequence_SO=chromosome | SO=protein_coding_gene | is_…	MGKIPLSLSDNFQLAVSSLPETQRQLIEVLSSCPDEELLHHLQPFRGWMWEKQGDVTAWAPALNRFDDLMVAYARHKGLLAASEEKNASPTPHGDSPKAFVPSDELVLAVLETSCIVLENCSSKCLYSSVDVVTSLVDAFYLPIVCSAVQVLAVCYGFVKRNRRTGLPRECPELTARLPLLCESPVAYDAFVLTRQPDRSRIQLPGLLYDSGDSSPTETPVGSGDPAARGPGQRRDRERDREAAVGRGSSRRLQRGEEPRLPGESRAETDEFSVSPRRVDPLTFYLAERFPLDFEGFAEFQIIVTSAGAGTPTGSPLVTPAEVSPHLSGLAGREGESHETVPKKPEPSREAAAASAKKDEYSAPRVKTVRIPCVELMLPEASPEDGGAEASALGRRASK…	0	340.816	14	90	115	90	8007	840.8	5.21	267.86	90	0.937	0.953	0.977	1.045	0.98	0.997	1.021	1.008	0.987	1.002	-0.09	-0.07	-0.03	0.06	-0.03	0	0.03	0.01	-0.02	0	0.50574	0.589245	0.827618	0.666003	0.3048	0.837313	0.219652	0.766792	0.544146	0.92943	0.889498	0.902448	0.940399
FALSE	High	Master Protein	TGGT1_244560-t26_1-p1	transcript=TGGT1_244560-t26_1 | gene=TGGT1_244560 | organism=Toxoplasma_gondii_GT1 | gene_product=HATPase_c domain-containing protein [Source:UniProtKB/TrEMBL;Acc:S7VTT7] | transcript_product=putative heat shock protein 90 | location=TGGT1_chrVI:3273039-3276701(+) | protein_length=853 | sequence_SO=chromosome | SO=protein_coding_gene | is_pseudo=false	MSPAGRRTPKKLAFAALLLGVSVACTSSFFSASVSPSALWVAATETDAAEPLTAEEAPRSLPIDESEKAAAPLTAEEQEAVQKSQESHQYQTEVSRLMDIIINSLYTQREVFLRELISNAVDALEKVRFTALSHPEVLEPKKNLDIRIEFDADAKTLSIIDSGIGMTKQDLINNLGTVAKSGTSNFLEAMAQGNDVNLIGQFGVGFYSAFLVADKVTVVSKNVEDDQHIWESSADAKFHVAKDPRGNTLGRGTCVTLHLKEDATEFLNEWKLKDLTTRFSQFMSYPIYVRTSRTVTEEVPIEDEEAETKDEDKDKDEDKEKDEDKDKDDVEVTEGDKDEKKDKPKTKKVEKKKDEWEQVNTQKAIWLRPKEEIEEKEYNEFYKSVSKDWSDPLAHIHFS…	0	339.755	56	55	242	54	853	97.5	5.03	673.59	55	1.055	1.082	1.078	0.924	0.975	0.999	0.996	0.966	0.986	1.007	0.08	0.11	0.11	-0.11	-0.04	0	-0.01	-0.05	-0.02	0.01	0.518505	0.496322	0.543443	0.502233	0.465458	0.75664	0.649221	0.410771	0.45572	0.811508	0.889498	0.902448	0.922119
FALSE	High	Master Protein	P35579	Myosin-9 OS=Homo sapiens (Human) OX=9606 GN=MYH9 PE=1 SV=4	MAQQAADKYLYVDKNFINNPLAQADWAAKKLVWVPSDKSGFEPASLKEEVGEEAIVELVENGKKVKVNKDDIQKMNPPKFSKVEDMAELTCLNEASVLHNLKERYYSGLIYTYSGLFCVVINPYKNLPIYSEEIVEMYKGKKRHEMPPHIYAITDTAYRSMMQDREDQSILCTGESGAGKTENTKKVIQYLAYVASSHKSKKDQGELERQLLQANPILEAFGNAKTVKNDNSSRFGKFIRINFDVNGYIVGANIETYLLEKSRAIRQAKEERTFHIFYYLLSGAGEHLKTDLLLEPYNKYRFLSNGHVTIPGQQDKDMFQETMEAMRIMGIPEEEQMGLLRVISGVLQLGNIVFKKERNTDQASMPDNTAAQKVSHLLGINVTDFTRGILTPRIKVGRD…	0	336.493	39	77	174	62	1960	226.4	5.6	445.52	77	0.91	0.923	0.932	1.089	0.99	1.005	1.015	1.035	1.02	1.042	-0.14	-0.12	-0.1	0.12	-0.01	0.01	0.02	0.05	0.03	0.06	0.606169	0.661866	0.678247	0.631896	0.173809	0.571634	0.138803	0.380803	0.374724	0.514965	0.889498	0.902448	0.922119
FALSE	High	Master Protein	TGGT1_231970-t26_1-p1	transcript=TGGT1_231970-t26_1 | gene=TGGT1_231970 | organism=Toxoplasma_gondii_GT1 | gene_product=MPN domain-containing protein [Source:UniProtKB/TrEMBL;Acc:S7WJ21] | transcript_product=pre-mRNA processing splicing factor PRP8 | location=TGGT1_chrVIII:1677402-1691932(+) | protein_length=2538 | sequence_SO=chromosome | SO=protein_coding_gene | is_pseudo=false	MLPNGSGGGFRPPPPGGSGVHPGPPPGHPCSPAGHLPPGLPLPPPPGFLGFPGSLGPPSSSPPPPHPAGLFVPPQQGPPAPGASSVPGSSQRMPPGGMFMPPPGFAGFQQPGGARPMHLPPHAQARGGSGAPLGPKGSPGGAAGAPGLNGATPNPPASGKSPFYGKDVRRMETSSPYAGAPQAKIESGFGAPQPSVFSRYPPPLPGPGQVSAGPPKDLRAKVKTAEELLAEKARKWQQLNTKRYGEKSKLGTGQDTTKEEMPPEHLRKLIKDHGDMTSKKFRHDKRVYLGALKYVPHAVYKLLENMPMPWEQVRNVAVLYHITGAITFVNEIPWVVEPIYLAQWGTMWIMMRREKRDRRHFKRMRFPPFDDEEPPLDYGDNVLDVEPLEAIQMQLDEEE…	0	328.193	31	69	164	49	2538	291.6	9	451.11	69	0.995	1.006	0.986	1.009	1.004	1.015	0.995	0.981	1.011	1.001	-0.01	0.01	-0.02	0.01	0.01	0.02	-0.01	-0.03	0.02	0	0.897085	0.91267	0.801241	0.782884	0.689099	0.540832	0.82493	0.115851	0.806567	0.945876	0.955919	0.963585	0.934713
FALSE	High	Master Protein	TGGT1_223920-t26_1-p1	transcript=TGGT1_223920-t26_1 | gene=TGGT1_223920 | organism=Toxoplasma_gondii_GT1 | gene_product=Rhoptry neck protein RON3 [Source:UniProtKB/TrEMBL;Acc:S7UWM8] | transcript_product=rhoptry neck protein RON3 | location=TGGT1_chrX:3357300-3367973(+) | protein_length=1958 | sequence_SO=chromosome | SO=protein_coding_gene | is_pseudo=false	MTTSPRVAKWALRVLALVFLHHVTVCTVCEAKALHVIRPHRNFAGLDVQQSSVADLQDEGKGISFAQTYRERDIWFGMLYFEYVITASTTMTLAFKSMAKYIYTAPFLTKLFASNRWLKYSTLDFQQKQQIIRKIARRASSKSLFTRALPDDRVADLFADMYLRRVTSRLSRTPGFRKPQYLRMKEDLTQLIKAANAPTEAMEVVLGNNTQDMFTWIDSVRQNPFATVKNVVVHAFENGLKGVSGMVEWELNQGCFAIAQQTRHILPFGSLFPGGILGKIMQKLMRSYIMFFHPVLANFKGLLALFLGVLCKVRLPQLINAVFGAIFRAKRRAGRYIHKFFFKTISLRKDITGKILVDDLVRGSGAVMITLLFQLHGVDIDAISRRGGAVESGVLAGQG…	0	319.037	36	66	191	66	1958	222.9	9.16	516.25	66	1.019	1.021	1.024	0.966	0.985	0.986	0.989	0.991	0.992	0.957	0.03	0.03	0.03	-0.05	-0.02	-0.02	-0.02	-0.01	-0.01	-0.06	0.514736	0.661076	0.476369	0.31738	0.0421475	0.557716	0.183944	0.428532	0.617301	0.445725	0.889498	0.902448	0.922119
FALSE	High	Master Protein	TGGT1_312630-t26_1-p1	transcript=TGGT1_312630-t26_1 | gene=TGGT1_312630 | organism=Toxoplasma_gondii_GT1 | gene_product=Putative anonymous antigen-1 [Source:UniProtKB/TrEMBL;Acc:S7W1P0] | transcript_product=putative anonymous antigen-1 | location=TGGT1_chrXI:2804165-2821550(-) | protein_length=2639 | sequence_SO=chromosome | SO=protein_coding_gene | is_pseudo=false	MAIGKVKRNPDAGVATAVQSVIQHQTFKRMLLFGLRSLADFCSPSNQLYQENALDALDRGVLSAIQTAVTTFSDDDDLMLCASRVLWAMSVAIKEEMDPAHIARVHSEGSPVIVAVVNSSPTDPQTIEDSMNFVDNLKRAGAPVDGASLAGGMLSIFTKTALDMKTAKRVTAALAIAAETAEGSTALYNAGGTSVLLTYCLDQGDLSDAGVEMVEGAFDTVRYMAGYQCTDATTLPQCIALMDKYRGRKSASAKGSSALAAMIGPEQLQKCLNTLKTAEAGSAEYDEALVTLGSMSYISSFTDEIVRAGGVPLLIELINSGLPQMEGNPEKIASMISGAAKMLARIASNPVNVDAIVQAGGVATLCTAVSYCTESMEALGALCMALVPLASRESLAHEI…	0	313.785	26	55	184	55	2639	286	5	544.74	55	0.943	0.943	0.923	1.066	1.005	1.005	0.984	1.007	1.012	0.995	-0.08	-0.08	-0.11	0.09	0.01	0.01	-0.02	0.01	0.02	-0.01	0.251064	0.19134	0.175391	0.358409	0.798502	0.85515	0.541677	0.162402	0.178026	0.902683	0.889498	0.902448	0.922119
FALSE	High	Master Protein	TGGT1_288380-t26_1-p1	transcript=TGGT1_288380-t26_1 | gene=TGGT1_288380 | organism=Toxoplasma_gondii_GT1 | gene_product=HATPase_c domain-containing protein [Source:UniProtKB/TrEMBL;Acc:A0A125YVB6] | transcript_product=heat shock protein HSP90 | location=TGGT1_chrIX:2294323-2298742(+) | protein_length=708 | sequence_SO=chromosome | SO=protein_coding_gene | is_pseudo=false	MADTETFAFNADIQQLMSLIINTFYSNKEIFLRELISNASDALDKIRYEAITDPEKLKGAERLFIRIVPNKQNNTLTIEDDGIGMTKAELVNNLGTIARSGTKAFMEALQAGGDISMIGQFGVGFYSAYLVADKVTVVSRHNDDEMYVWESSAGGSFTVSKAEGQFENIVRGTRIILHMKEDQTEYLEDRRLKDLVKKHSEFISFPIELAVEKSVDKEITESEDEEKPAEDAEEKKEEGEEEKKEEGAEKKKKTKKVKEVVVEYEQLNKQKPLWMRKPEDVTWEEYCAFYKSLTNDWEDPLAVKHFSVEGQLEFKALLFLPKRAPFDLFETRKKRNNVRLYVRRVFIMDDCEDLIPEWLNFVRGVVDSEDLPLNISRESLQQNKILKVIKKNLVKKCLE…	0	301.981	62	44	269	41	708	81.9	5.03	692.19	44	1.074	1.091	1.085	0.915	0.983	0.999	0.993	0.982	0.987	0.994	0.1	0.13	0.12	-0.13	-0.02	0	-0.01	-0.03	-0.02	-0.01	0.555248	0.534775	0.56112	0.453239	0.298985	0.972903	0.810118	0.0206746	0.424789	0.00190612	0.889498	0.902448	0.922119
FALSE	High	Master Protein	TGGT1_219540-t26_1-p1	transcript=TGGT1_219540-t26_1 | gene=TGGT1_219540 | organism=Toxoplasma_gondii_GT1 | gene_product=Alanine--tRNA ligase [Source:UniProtKB/TrEMBL;Acc:S7WHV1] | transcript_product=cytosolic tRNA-Ala synthetase | location=TGGT1_chrXII:800723-814444(-) | protein_length=1280 | sequence_SO=chromosome | SO=protein_coding_gene | is_pseudo=false	MLDVPILCALLVLLLSSLPAGAGALCVSLHRVSPSCLHSWEGGGCGFSSVSPPGRFASDCSERRRLPQPSLTTENVSASLNSGSALSSPPRRLSDFVRMQPRLLQERLFTDLSFLSRPRQTFSSSRLGVFSSPALSPLRSSSSATRVLLNFSRPARPRLCSRSPRHPSPSFCSSSTFPQSPSRSSLSSTWTSLLLSDVRLASGAASLSSPWESFSLITSAARRPDSRAFARIPLVPLSIHSGKMAMTEEERRAKIEEISAKGKAKGWSGEAVRGAYLEFFEAQGHLIYPSSPVIPRGDNTLLFINAGMNQFKPIFLGQIDRSSPLSKLRRVADTQKCIRAGGKHNDLEDVGKDVYHHTFFEMLGNWSFGDYFKREAIAWAWQLLTEVYKIPKDRLYASY…	0	283.042	43	51	224	51	1280	139.3	6.83	561.51	51	1.055	1.072	1.073	0.921	0.972	0.987	0.988	0.995	0.994	1.001	0.08	0.1	0.1	-0.12	-0.04	-0.02	-0.02	-0.01	-0.01	0	0.597514	0.544264	0.552293	0.479563	0.090465	0.13221	0.291411	0.415523	0.036714	0.934623	0.889498	0.902448	0.922119
FALSE	High	Master Protein	TGGT1_290950-t26_1-p1	transcript=TGGT1_290950-t26_1 | gene=TGGT1_290950 | organism=Toxoplasma_gondii_GT1 | gene_product=Clathrin heavy chain [Source:UniProtKB/TrEMBL;Acc:A0A125YSB0] | transcript_product=putative clathrin heavy chain | location=TGGT1_chrIX:3770246-3782423(-) | protein_length=1731 | sequence_SO=chromosome | SO=protein_coding_gene | is_pseudo=false	MAQQFPIQLHSVVNLADQGVSASSFRFGNVAMHGDKNLVVKDTETNELFIFSLSVREVHEGRVSPSSPGFSFTKKPTQAEAALMHPSEKVVALRAKTEGSAGHMIQVLNLETKVRLGTAQMNEPVVYWRWVAPTLLALVTDRAVYHWTVGENGETTAEPEKVCSREGRLADAVQIISYAVDKDLKWCILTGISTQDGGKTIDGSMQLYSMELKKQQQLEGHAACFNNIVIDEAVGPQPVICFTEKKRGSPDFKLHIRDIYSSRDGGQTPLRLAVDLRMPEDAPTDFPLSIHISQKFGVVYIVTKGGYLILLDALTGTELFRHRILQDAVFLATDSPQTGGILTVNKRGLVCLCNINLQALIPYINQALVYVPNRQQIATSLAKRYGLPGAEETLMQEFN…	0	282.507	32	51	181	51	1731	194.4	6.06	486.59	51	1	1.01	0.993	0.996	0.997	1.007	0.99	1.005	1.008	0.998	0	0.01	-0.01	-0.01	0	0.01	-0.01	0.01	0.01	0	0.973566	0.240114	0.824248	0.0847512	0.813591	0.311882	0.735629	0.571466	0.133114	0.949101	0.985572	0.902448	0.940034
FALSE	High	Master Protein	TGGT1_306660-t26_1-p1	transcript=TGGT1_306660-t26_1 | gene=TGGT1_306660 | organism=Toxoplasma_gondii_GT1 | gene_product=MATH domain-containing protein [Source:UniProtKB/TrEMBL;Acc:S7UIG4] | transcript_product=RNA pseudouridine synthase superfamily protein | location=TGGT1_chrIX:6025601-6045208(-) | protein_length=6535 | sequence_SO=chromosome | SO=protein_coding_gene | is_pseudo=false	MGNGVSAPPGGAGLDGPASALQGSPFVSSAVLSSASRRRSSRLRAACEAKAAGSSVDQTFCSAVDPPKVPSASSCALKSLPLPLPLLPALSDSALPPPPSSTRSEPPYLSPWLSSSPDSLSPCSSCPAHPPSRRSSRPSSAFGRGSPECSHSGTTLIPEAALHALREKNLDAISGLPPASDMAYGVLCPGAVSCAEDNGSGAFLLSSAALPKGREDAHLAAGDSSLPMGERATGGADCLVSCFPPAFSREAISAYVSRSSRAYLLEAVRQEADHRCLSDDEMGPLPSGGGGGSGSSLVADSPAISATEGTKNSGVRLSDHFFLLPAASGGAPAVNPPSTPSQNVVSLSPACLSCPSAHPTSRGATGTGEAGQIVSRLADCVEDSLLSEALKGTLQAGET…	0	275.165	14	75	106	75	6535	675.8	6.76	267.53	75	0.948	0.946	0.97	1.056	1.001	0.999	1.024	1.015	0.998	1.021	-0.08	-0.08	-0.04	0.08	0	0	0.03	0.02	0	0.03	0.54124	0.593241	0.803893	0.48864	0.908245	0.963065	0.691505	0.567823	0.784394	0.716577	0.889498	0.902448	0.934884
FALSE	High	Master Protein	TGGT1_228170-t26_1-p1	transcript=TGGT1_228170-t26_1 | gene=TGGT1_228170 | organism=Toxoplasma_gondii_GT1 | gene_product=Metallophos domain-containing protein [Source:UniProtKB/TrEMBL;Acc:S7UX86] | transcript_product=inner membrane complex protein IMC2A | location=TGGT1_chrX:431147-436956(-) | protein_length=1596 | sequence_SO=chromosome | SO=protein_coding_gene | is_pseudo=false	MERRTRPDVSPRWQARRIHFVWLTALAVPIFLLFPSLSLLESTSSAGCSGIQCFASFPGVAAGSTHSREGADPSPQETLMQPRRLSGIIKTLVLWDPVQRLMPSLNLDSVVFVAGKHKADRSAAFHTTMDDVMTLLLRWFNEKDKPNWLLQGFVTEAALFREHVRYQDQMIHEQTQNQSEQQPTDPQAGMDKVLNIEVYTYLAGAKRRVRDWICDGNTFMRTGEEGSHAFKQPFLTERDVGFLRGLPYNVLRVARGVYSKRLPASVKRLQEELFHRGIRTLNDLLLKTNLMDLFVLFDIMDESFTQIDVLREFSNRWKKYRAEEVVPPLLPPGKWEGERSIEELMRDDHYPSMKFPRCTMLKCVMQDTWSKNAVETITVEKKDTNSLKLLLIGNTGIGE…	0	271.139	38	56	138	56	1596	182.2	5.94	397.77	56	1.056	1.062	1.066	0.974	1.028	1.034	1.038	0.983	0.989	0.977	0.08	0.09	0.09	-0.04	0.04	0.05	0.05	-0.02	-0.02	-0.03	0.332467	0.439652	0.330321	0.799405	0.684691	0.487613	0.560797	0.12523	0.452142	0.328859	0.889498	0.902448	0.922119
FALSE	High	Master Protein	TGGT1_201680-t26_1-p1	transcript=TGGT1_201680-t26_1 | gene=TGGT1_201680 | organism=Toxoplasma_gondii_GT1 | gene_product=Eukaryotic translation initiation factor 3 subunit A [Source:UniProtKB/TrEMBL;Acc:S7WB14] | transcript_product=putative eukaryotic initiation factor-3 subunit 10 | location=TGGT1_chrVIIa:3754116-3762345(+) | protein_length=1031 | sequence_SO=chromosome | SO=protein_coding_gene | is_pseudo=false	MQSFQKPENALKRADELLSVGQQDAALKILHGAIGHRRFRSQGWDSVQETIMIRHVQLCVDENKLRLARDGLHQYRIISQHANIQSLGKVIAELRSRAEQKLTQAKESAAGASASPKSADAPVLPGQGLGDLDSVADSPEDLLLSTLQIEVRSAEARGIHQALRSVWDVYKMVLDLLRTTPKLERVYHETARKAFLFCKENQRPQEFKRLCDVLRSHFALILKNRHKEDYESLMRPDLHLETRMQQLVVASELELWRECYATAEDLYSLGLHDYFLKALRTGQDLFHNSREKLMRWLAIYYEKLSRVTWVAENYLFHALAWIKLLLHVKGFKKNASQEDLQAMASVAVLAVLSIPISGAEKKPGDDAVTMGEGMNYGSLEQQKKLTMLLGHSTLPSREG…	0	262.152	42	44	158	43	1031	118.8	8.73	422.72	44	1.04	1.054	1.054	0.951	0.989	1.002	1.002	0.988	0.991	0.992	0.06	0.08	0.08	-0.07	-0.02	0	0	-0.02	-0.01	-0.01	0.62313	0.573401	0.481358	0.541592	0.0423415	0.85076	0.823973	0.316296	0.25385	0.54795	0.889498	0.902448	0.922119
FALSE	High	Master Protein	TGGT1_223390-t26_1-p1	transcript=TGGT1_223390-t26_1 | gene=TGGT1_223390 | organism=Toxoplasma_gondii_GT1 | gene_product=Putative activating signal cointegrator 1 complex subunit 3 family 1 ASCC3L1 [Source:UniProtKB/TrEMBL;Acc:S7W4M7] | transcript_product=putative activating signal cointegrator 1 complex subunit 3 family 1 ASCC3L1 | location=TGGT1_chrX:3771178-3788152(+) | protein_length=2207 | sequence_SO=chromosome |…	MAEEFERFKRFEYRQNSNLVLQRDTSTGVAPAVHLGEPTGEPESLAGRKLYPMGDKVERGLKKEDRPVKNDSKRAKLKRNKLDLKRGATVLDADVTEIFFYKPTTQQTRLVYEQLLVTLQQQLGDQPDEVLKGAADEVLAALKADGCRESEKKKNVEQVLGPVNSDVFTRLHQLAKNITDYSLGGEEEDGAQAGGLDGSTGVAVVFDEEEEEDANELMEAEVLPGEEEEEDEEEEEDADRTYLAAKAVDEEELADRDAYELDISKIDPHWLQRELNGVFKDPNKAVATEKEILSILPTPDIQKCENQLVVILKYENFELAKRILKNRWKIFFAVRLGQAQSPEEKNAIFEEMRSSPEGQEVLELLDALSSRRNKEKEIAINVRKEAASLAAKAQARAAS…	0	259.885	28	58	119	58	2207	248.3	6.32	313.39	58	1.093	1.093	1.108	0.915	1	1	1.014	1.002	1.005	1.03	0.13	0.13	0.15	-0.13	0	0	0.02	0	0.01	0.04	0.395247	0.408387	0.377306	0.458138	0.990643	0.988622	0.375169	0.883402	0.751587	0.0421115	0.889498	0.902448	0.922119
FALSE	High	Master Protein	TGGT1_216670-t26_1-p1	transcript=TGGT1_216670-t26_1 | gene=TGGT1_216670 | organism=Toxoplasma_gondii_GT1 | gene_product=FUSE-binding protein 2 / KH-type splicing regulatory protein [Source:UniProtKB/TrEMBL;Acc:S7VUJ0] | transcript_product=FUSE-binding protein 2 / KH-type splicing regulatory protein | location=TGGT1_chrXI:5891708-5895741(-) | protein_length=941 | sequence_SO=chromosome | SO=protein_coding_gene | is_pse…	MARKKRGSAATPEEGETPPAGQVAQKTPETGSAPQATEKPKEVSTQDLLAATALVARPQVDTSNLSASQKKNLKKKIRKQEQRQQEAAVLAVVRPEAKATGMASHYAEQEAPLRRRLEALKRAAGQQTRGSGAPSAKKLSQDVEAVLREIDGTLEREVAALQKPLSKRVTVQQLQQQIRDVEAQVQKQQRELQRQAHQGEGESAEIRACLDESLRYVVHLREQLILTQQQNELRVFRDRLGALKAEGEGLLKALHASGSPGGERGRAGHAGNGSASPSGAKEAQWRRRLGDLSRGGPERRRGPKPAEEEETAQPQPLVVQHVSLGPDAMGLLFPGGQNPVLVRKLERACGLVLDKQSGGAGRAGTVAVVGLQAANVDRGVALLNSLDEGMQPEKREKHR…	0	258.881	49	41	160	41	941	100	8.95	438.2	41	1.053	1.055	1.042	0.961	1.012	1.013	1.001	1.011	0.992	1.007	0.08	0.08	0.06	-0.06	0.02	0.02	0	0.02	-0.01	0.01	0.483437	0.546141	0.646415	0.689031	0.728454	0.527785	0.964274	0.547663	0.0685388	0.779569	0.889498	0.902448	0.922119
FALSE	High	Master Protein	TGGT1_219850-t26_1-p1	transcript=TGGT1_219850-t26_1 | gene=TGGT1_219850 | organism=Toxoplasma_gondii_GT1 | gene_product=AA_TRNA_LIGASE_II domain-containing protein [Source:UniProtKB/TrEMBL;Acc:S7V2A6] | transcript_product=prolyl-tRNA synthetase (ProRS) | location=TGGT1_chrXII:529404-538395(-) | protein_length=830 | sequence_SO=chromosome | SO=protein_coding_gene | is_pseudo=false	MRPGVFSRGFCRPGTLFSPFSLLFSSLWWTLWTRPSTTLAFRASVPRFSRGTACRATDAFLVPELRVESSLLRGCASLRPFASTSLGRQGLGNFPGIQSQASKTLRFPGSSFCQVSACKMATNSDVSVLSAEEQRREAKALQKLEELGIGYQLHRHAPVATVDAMVKASFRDKGVIAANLFLKEKQRFFLLTVTHDLPIPLKGIAKLLSAPRMRLADEELLGPMLDVSKGSVTPLAAMCDEKKEVTLVFDSAMKKNPDLVVLVHPLHNKATVALKASDLVKFVEACGHSVMWLDVDEAVKLAAAPAGGANKPNAPAGKAPGAKEAVTDSSMLGVTAKKDENFSEWYTQAIVRSEMIEYYDISGCYIMRPWAFHIWEKVQRFFDDEIKKMGVENSYFPMF…	0	252.505	47	34	127	34	830	93.4	8.07	414.68	34	1.06	1.099	1.077	0.913	0.968	1.004	0.984	1.001	1.003	1.014	0.08	0.14	0.11	-0.13	-0.05	0.01	-0.02	0	0	0.02	0.581676	0.379952	0.545022	0.462414	0.10317	0.857023	0.18959	0.971914	0.825978	0.658783	0.889498	0.902448	0.922119
FALSE	High	Master Protein	TGGT1_292020-t26_1-p1	transcript=TGGT1_292020-t26_1 | gene=TGGT1_292020 | organism=Toxoplasma_gondii_GT1 | gene_product=GCC2 and GCC3 domain-containing protein [Source:UniProtKB/TrEMBL;Acc:S7UNY5] | transcript_product=GCC2 and GCC3 domain-containing protein | location=TGGT1_chrIX:4285927-4313392(+) | protein_length=7440 | sequence_SO=chromosome | SO=protein_coding_gene | is_pseudo=false	MSSLASDANNSSSAADIVHDFCTKICDPVSVSSFAEVGGSPRSSDASSRPLGKALRKSRLVGFFLVPVFVVFFVLSSDATSSTRGVGVLSARADREEKSSVSSSSRASSSPGASALLVQTTYAENPYRDTKAAGYTGRSSRRSARARRRRAADGGEGKGFLGDMLNKSMLETRSRSTAADPYQQFTSCGSGMFVSTEVGEDGGVEKTAKVDESMNCWNVCAFVEDLVYDQCSSTPSPTECITRALKSHSLVPDGYKGNCRYSSPQDVSPTFWDAEPDSEFCLDKGMNAWLKSDSWDDFVSKKPPGCIYPKQDPSIPASTPTAYVNDATSGLGEALASLVPVEYYVVVRDAEEAMNNPIEYGAYVASSIVPREYWDKVSSDAKDGWHVARAFSVPDKPAE…	0	248.178	11	69	94	69	7440	799.5	4.87	232.58	69	0.993	1.017	1.02	1.009	1.002	1.026	1.029	1.027	1.032	0.986	-0.01	0.02	0.03	0.01	0	0.04	0.04	0.04	0.05	-0.02	0.628277	0.415952	0.0500996	0.544617	0.263697	0.0621157	0.184456	0.533664	0.349187	0.124378	0.889498	0.902448	0.922119
FALSE	High	Master Protein	TGGT1_221320-t26_1-p1	transcript=TGGT1_221320-t26_1 | gene=TGGT1_221320 | organism=Toxoplasma_gondii_GT1 | gene_product=Acetyl-CoA carboxylase ACC1 [Source:UniProtKB/TrEMBL;Acc:S7VU47] | transcript_product=acetyl-CoA carboxylase ACC1 | location=TGGT1_chrII:218988-235059(-) | protein_length=2614 | sequence_SO=chromosome | SO=protein_coding_gene | is_pseudo=false	MPTRTHARVRSVCTMGVVSRAAAASWPLASRARDSGALWGGLGNDGEAGNRFPVTFSLSGETNGKPQTHHCSRPIDHRETRRGNGGVSGFFVFLFLFFFSPLSATAGPTQSGNLLPYTGGPWENSRRPEDGHRAFSLASSQPSFFGPPAASSGPSHVGNPHGSDLVPPSSLSPSSSVVSSFAVSSPVSAHGLRKRRPMLPFSRSRRSMTFLSGPPISASPSSVSSSARFPSRSCSSLSLHREARDSPRCHGVSCSVFESPELRHATFLSHPVPHSPLSSPATPASFSSRSAPGNQSAIQASTTESRVGEREGEATPTRVGDGEGDPLADYVRKHGGKRVIRRVLIANNGMAATKSIFSMRQWAYMELGDDKLLEFVVMATPEDMRANPEFIRRADKIVE…	0	246.07	28	65	131	65	2614	287.6	7.53	285.76	65	0.94	0.957	0.953	1.026	0.964	0.982	0.977	0.986	0.979	0.982	-0.09	-0.06	-0.07	0.04	-0.05	-0.03	-0.03	-0.02	-0.03	-0.03	0.457552	0.499544	0.548693	0.755575	0.151141	0.516727	0.170824	0.587038	0.267779	0.104324	0.889498	0.902448	0.922119
FALSE	High	Master Protein	TGGT1_294350-t26_1-p1	transcript=TGGT1_294350-t26_1 | gene=TGGT1_294350 | organism=Toxoplasma_gondii_GT1 | gene_product=DEAD/DEAH box helicase domain-containing protein [Source:UniProtKB/TrEMBL;Acc:A0A125YTI5] | transcript_product=DEAD/DEAH box helicase domain-containing protein | location=TGGT1_chrIa:802644-825713(-) | protein_length=2434 | sequence_SO=chromosome | SO=protein_coding_gene | is_pseudo=false	MENSQQLLELESLAVDRGETGRRPPGKLRSATRSPTAVARGCPLEDGLSGLRNLSGPRGPSMALWLLVGDMSPGPSCRPLLRLVLCTASSLAFPGSLPYFSSLRDLTPRRSLASPVSSPAAAASLSSPQCLAFVALRGPRVSAAPAACVFARTSPQRTMRDSDGPSRFGRRVSDQLMSLDSSASLAATPKPTKEQLLADEHEGRVASKVDVGAVTDAAGEKDKEDFREGGAEGKGAGGGRGDGAVGDEEFYAEGVAAVSMVAEDELEAPLRMLSWWAALLPQTRGEVMTELGGSYLFFVHGDSLILHLLRKNYVDFDVEQGIQPLLYMHLIEKQLLSLISAGAILHLVFFRVFEDVVVGGDSRDAVPSMFLLIREQLLLYLSVMKVDFTVVDDWFSDDW…	0	244.312	25	59	114	59	2434	273.6	6	284.52	59	0.912	0.934	0.927	1.096	1	1.024	1.016	1.018	1.026	1.033	-0.13	-0.1	-0.11	0.13	0	0.03	0.02	0.03	0.04	0.05	0.403905	0.573829	0.51973	0.463332	0.989174	0.0979644	0.0567879	0.204922	0.373986	0.0170955	0.889498	0.902448	0.922119
FALSE	High	Master Protein	TGGT1_254940-t26_1-p1	transcript=TGGT1_254940-t26_1 | gene=TGGT1_254940 | organism=Toxoplasma_gondii_GT1 | gene_product=MI domain-containing protein [Source:UniProtKB/TrEMBL;Acc:S7W271] | transcript_product=MIF4G domain-containing protein | location=TGGT1_chrIII:2027943-2043635(+) | protein_length=3756 | sequence_SO=chromosome | SO=protein_coding_gene | is_pseudo=false	MFSHDGSNVSRPREELRHSGREEDRRRPSLSYAPVHTAPVRGRGGPRGPTRPHVGGPSQALAGHSENPGCPPLLSAAFAAPQHGNVRPSISRGGQAPLERRPSGEETGPGAPHSVAHTNGPFPRASGPPGPAGLAPSGATNGSDRESAQSEEVRTGAPLGASVPAGPFGFHPGPVPSSLCGPPPPSPPGSVGCLRPHLGGDGARGPNGPRGERDGPPLHTGRPSPAPHGGPFVPSGDHERDRVLGVPAGGMGPSNGPSRSVGGAGPGRAFEEHLGGRGGRGGAPLGVTSPEGLGREDAHFPGDRDARPENGPVPSHPRKLRGPPTNSVGGRGHANVDFPGGAPGASQHSGQGLQGNVDQPRGPPHPGDMQLMGPPMHPPFHHGREGPAGLGNDMGPGMR…	0	243.343	21	66	120	66	3756	384.6	6.87	281.9	66	0.984	0.97	0.991	1.015	0.999	0.985	1.007	0.973	0.983	0.975	-0.02	-0.04	-0.01	0.02	0	-0.02	0.01	-0.04	-0.02	-0.04	0.749129	0.432032	0.878965	0.781249	0.894148	0.567949	0.171634	0.358218	0.322282	0.244731	0.897669	0.902448	0.957407
FALSE	High	Master Protein	TGGT1_273760-t26_1-p1	transcript=TGGT1_273760-t26_1 | gene=TGGT1_273760 | organism=Toxoplasma_gondii_GT1 | gene_product=Heat shock protein HSP70 [Source:UniProtKB/TrEMBL;Acc:A0A125YP12] | transcript_product=heat shock protein HSP70 | location=TGGT1_chrVIII:3285695-3287698(-) | protein_length=667 | sequence_SO=chromosome | SO=protein_coding_gene | is_pseudo=false	MADSPAVGIDLGTTYSCVGVWKNDAVEIIANDQGNRTTPSYVAFTDTERLVGDAAKNQVARNPENTIFDAKRLIGRKFDDPSVQSDMKHWPFKVIAGPGDKPLIEVTYQGEKKTFHPEEVSAMVLGKMKEIAEAYLGKEVKEAVITVPAYFNDSQRQATKDAGTIAGLSVLRIINEPTAAAIAYGLDKKGCGEMNVLIFDMGGGTFDVSLLTIEDGIFEVKATAGDTHLGGEDFDNRLVDFCVQDFKRKNRGKDISTNSRALRRLRTQCERTKRTLSSSTQATIEIDSLFEGIDYSVSISRARFEELCMDYFRNSLLPVEKVLKDSGIDKRSVSEVVLVGGSTRIPKIQQLITDFFNGKEPCRSINPDEAVAYGAAVQAAILKGVTSSQVQDLLLLDVA…	0	240.83	58	37	246	30	667	72.2	5.2	669.13	37	1.071	1.051	1.04	0.957	1.025	1.006	0.995	1.04	1.015	0.999	0.1	0.07	0.06	-0.06	0.04	0.01	-0.01	0.06	0.02	0	0.55219	0.596734	0.611235	0.572219	0.512666	0.724359	0.10943	0.118586	0.490529	0.464994	0.889498	0.902448	0.922119
FALSE	High	Master Protein	TGGT1_278870-t26_1-p1	transcript=TGGT1_278870-t26_1 | gene=TGGT1_278870 | organism=Toxoplasma_gondii_GT1 | gene_product=Myosin F [Source:UniProtKB/TrEMBL;Acc:S7UZI5] | transcript_product=myosin F | location=TGGT1_chrXII:5709485-5725053(+) | protein_length=1953 | sequence_SO=chromosome | SO=protein_coding_gene | is_pseudo=false	MTASSADGASAPGGGDPGEEEVRCAVGTKIYVPDAADVWRTAEVVKIQEDGSLTARVDADNELVQLKKNDIWYLCNTDVWNTTGLSAPTDLTMLTHLHEAAVLDSLNLRFDIDEIYTFTGPILIAVNPFKQITGLYDMKQLVRYIASSELPMPGVPSSSSGSSSNAPVALPISRQPHVFASSSAAYQGMCNEKQSQTILISGESGAGKTESTKFVMKFLACAGSEDLERRSQVEAQVLESNPLLEAFGNARTLRNDNSSRFGKFIELQFQTSKAKRMSGNRGRLCGARIQTYLLEKVRVCDQQEGERNYHIFYQLCAAAEAAAQTGGIYYFPSPKFRKAADAKAQEMDMSLFEPRDKFKYLTKSSCHQLQGVDDCEEFESTLFAMQTVGISPEEQMSIL…	0	240.637	33	56	115	55	1953	216.3	8.1	305.14	56	0.944	0.966	0.945	1.05	0.991	1.015	0.992	0.98	0.998	0.987	-0.08	-0.05	-0.08	0.07	-0.01	0.02	-0.01	-0.03	0	-0.02	0.55354	0.72316	0.509914	0.518656	0.687134	0.625233	0.449255	0.162125	0.257239	0.25546	0.889498	0.905555	0.922119
FALSE	High	Master Protein	TGGT1_254570-t26_1-p1	transcript=TGGT1_254570-t26_1 | gene=TGGT1_254570 | organism=Toxoplasma_gondii_GT1 | gene_product=hypothetical protein | transcript_product=hypothetical protein | location=TGGT1_chrIII:1812321-1825184(-) | protein_length=1997 | sequence_SO=chromosome | SO=protein_coding_gene | is_pseudo=false	MDAETPTSPPASGESTTVGSAEPPAPVGVSEHPSAGDKMEASLEAASVDSVSPHSVSSDPILSADSSSSCPDGDAAVEREALLAQNAQLRRLLQQQASELERMRAASRDPRVCAEPGDKKASKDKEEPVAAAAAEALKKEDELTALRQQLRGVQDQAIELQTRNDRLVVEQQQLVESLTREKVERLSAERHSLAAAASAASAEGRQRLQQQRLEIAENAQNQLREQLTLARQEQQQQLEEAAEAARVAAKTKAALDARLQEAQEENELLRRKAEDLENLLRQRQRESALEHEKEKQELLAAHEAVALKEELLALKTQHVEKQEKCLQVLQESNAQLQLDNQRLATLVEEKDKELSELKETLARVDGSATSSQSGLTKLAEAAASPGTELPVPPRLSREE…	0	240.237	34	63	105	63	1997	224	4.91	274.04	63	0.965	0.948	0.966	1.054	1.017	0.999	1.018	1.005	1.01	0.988	-0.05	-0.08	-0.05	0.08	0.02	0	0.03	0.01	0.01	-0.02	0.663372	0.293555	0.707398	0.480105	0.366108	0.979301	0.545096	0.434937	0.429249	0.244882	0.889498	0.902448	0.922119
FALSE	High	Master Protein	TGGT1_311720-t26_1-p1	transcript=TGGT1_311720-t26_1 | gene=TGGT1_311720 | organism=Toxoplasma_gondii_GT1 | gene_product=Chaperonin protein BiP [Source:UniProtKB/TrEMBL;Acc:A0A125YJG4] | transcript_product=chaperonin protein BiP | location=TGGT1_chrXI:2188121-2191497(-) | protein_length=668 | sequence_SO=chromosome | SO=protein_coding_gene | is_pseudo=false	MTAAKKLSLFSLAALFCLLSVATLRPVAASDAEEGKVKDVVIGIDLGTTYSCVGVYRHGRVDIIPNDQGNRITPSYVAFTDDDRKIGEAAKNEATINPTNTLFDVKRLIGRRFNEKEVQKDKDLLPYEIINKDGKPYIRVMVKGEPKVLAPEEVSAMVLTKMKETAEQFLGKEVKNAVVTVPAYFNDAQRQATKDAGAIAGLNVIRIINEPTAAAIAYGLDKKNEKTILVYDLGGGTFDVSVLVIDNGVFEVLATSGDTHLGGEDFDQRVMDHFIKLVKKKYDKDLRTDKRGLQKLRREVERAKRALSSQHQAKVEVENLMEGVDFSETLTRAKFEELNSDLFQKTLKPVKQVLEDADLQKSQVDEIVLVGGSTRIPKIQQLIKDFFNGKEPNRGINPD…	0	239.171	52	37	237	34	668	73.2	5.38	733.91	37	1.07	1.067	1.052	0.95	1.017	1.014	1	1.045	1.025	1.04	0.1	0.09	0.07	-0.07	0.02	0.02	0	0.06	0.04	0.06	0.596882	0.547848	0.585726	0.581892	0.637256	0.38327	0.905247	0.115133	0.00260635	0.267546	0.889498	0.902448	0.922119
FALSE	High	Master Protein	TGGT1_286420A-t26_1-p1	transcript=TGGT1_286420A-t26_1 | gene=TGGT1_286420A | organism=Toxoplasma_gondii_GT1 | gene_product=Elongation factor 1-alpha [Source:UniProtKB/TrEMBL;Acc:S7W358] | transcript_product=putative elongation factor 1-alpha (EF-1-ALPHA) | location=TGGT1_chrV:1692242-1694172(-) | protein_length=448 | sequence_SO=chromosome | SO=protein_coding_gene | is_pseudo=false	MGKEKTHINLVVIGHVDSGKSTTTGHLIYKLGGIDKRTIEKFEKESSEMGKGSFKYAWVLDKLKAERERGITIDIALWQFETPKYHYTVIDAPGHRDFIKNMITGTSQADVALLVVPAEAGGFEGAFSKEGQTREHALLAFTLGVKQMIVGINKMDSCNYSEDRFNEIQKEVAMYLKKVGYNPEKVPFVAISGFVGDNMVEKSTNMSWYKGKTLVEALDTMEAPKRPSDKPLRLPLQDVYKIGGIGTVPVGRVETGILKAGMVLTFAPVGLTTECKSVEMHHEVMEQAVPGDNVGFNVKNVSVKELKRGYVASDSKNDPAKGCATFLAQVIVLNHPGEIKNGYSPVIDCHTAHIACKFAEIKTKMDKRSGKTLEEAPKCIKSGDAAMVNMEPSKPMVVE…	0	238.483	66	24	298	4	448	49.5	8.78	770.36	24	1.114	1.112	1.11	0.902	1.005	1.003	1	1.057	0.993	0.992	0.16	0.15	0.15	-0.15	0.01	0	0	0.08	-0.01	-0.01	0.618402	0.543452	0.558579	0.594193	0.842344	0.9075	0.982699	0.179953	0.783282	0.0291123	0.889498	0.902448	0.922119
FALSE	High	Master Protein	TGGT1_205470-t26_1-p1	transcript=TGGT1_205470-t26_1 | gene=TGGT1_205470 | organism=Toxoplasma_gondii_GT1 | gene_product=Tr-type G domain-containing protein [Source:UniProtKB/TrEMBL;Acc:A0A125YJ59] | transcript_product=putative translation elongation factor 2 family protein | location=TGGT1_chrVIIa:1297616-1301283(+) | protein_length=832 | sequence_SO=chromosome | SO=protein_coding_gene | is_pseudo=false	MVNFSVEQMREIMGNPKNIRNMSVIAHVDHGKSTLTDSLVSKAGIISAKAAGDARFTDTRADEQERCITIKSTGISMYFEHDMEDGKGAQPYLINLIDSPGHVDFSSEVTAALRVTDGALVVVDTIEGVCVQTETVLRQALAERIRPVLHVNKVDRALLELQMDGEEIYQTFSRTIENVNVIISTYNDELMGDVQVYPEKGTVSFGSGLHGWAFTVERFSKIYAKKFDVPKEKMMERLWGNNFYNAKEKKWTKTQSENTRRAFCQFIMDPICTLFTSIMNDEKEKYTKMLGSLGIELKGDDRDLTGKALLKRVMQLWLPAGDTLLEMVVRHLPSPFAAQKYRVENLYEGPMDDEAAQGIRNCDPNAPLMMYVSKMVPTSDKGRFYAFGRVFSGTVATGQ…	0	236.249	42	33	232	31	832	93	6.33	685.5	33	1	0.999	1.001	0.985	0.984	0.984	0.986	1.002	0.999	0.996	0	0	0	-0.02	-0.02	-0.02	-0.02	0	0	-0.01	0.992221	0.970108	0.969852	0.441757	0.311002	0.247714	0.372897	0.839166	0.878955	0.755092	0.995966	0.988653	0.990433
FALSE	High	Master Protein	TGGT1_291180-t26_1-p1	transcript=TGGT1_291180-t26_1 | gene=TGGT1_291180 | organism=Toxoplasma_gondii_GT1 | gene_product=hypothetical protein | transcript_product=hypothetical protein | location=TGGT1_chrIX:4004987-4034538(-) | protein_length=5394 | sequence_SO=chromosome | SO=protein_coding_gene | is_pseudo=false	MLEALVERLLSRYLALYVTGISRDKLSVAVWSGDVELEDLQLKPEISDLFGLPFRVVSGRLKRIRLSIPWARLGSAPVCLEVEGVHVLLEPKPIPEQTDEELIAQLRDAKKQQIDVVEQQLLDARSQLLKATDAAASAPAADRGVFFKFANKIVNSIQIDVRDIHIAFADPSRGFKIGVLLADCSVHNTDALWRRSVSEGSSAGGAPMVLYKACELNGLAVYCSLACGAGGETAVAGSELNARSHEVSFRSLPRSKSSSQSSSASSLPETSPGGVHATPADRDDGDLPTARDRLHTETKEVRDSRAPSPCDTGGLDTGGGRSAEAAGAFAEEREETLQAKTSGSSEFAEAFFLAPIPEQNYVLKPLHMRLLISHSTTLRELCARLEVKKESQGIEIGRT…	0	235.465	15	67	97	67	5394	578.5	6.39	216.92	67	1.01	0.994	1.018	0.99	1	0.984	1.008	1.007	0.985	0.978	0.01	-0.01	0.03	-0.01	0	-0.02	0.01	0.01	-0.02	-0.03	0.512189	0.863987	0.675267	0.597151	0.92413	0.434255	0.740372	0.596915	0.154921	0.017618	0.889498	0.948658	0.922119
FALSE	High	Master Protein	TGGT1_269180-t26_1-p1	transcript=TGGT1_269180-t26_1 | gene=TGGT1_269180 | organism=Toxoplasma_gondii_GT1 | gene_product=MIF4G domain-containing protein [Source:UniProtKB/TrEMBL;Acc:S7WKZ1] | transcript_product=MIF4G domain-containing protein | location=TGGT1_chrVIII:6008955-6021323(-) | protein_length=2668 | sequence_SO=chromosome | SO=protein_coding_gene | is_pseudo=false	MSAVADGASSGTIHQSLQNSRVELFAEQSSSVGAGSGNHPLFECSDFLSSCDSALPAAPQYPPFSVGGTRESPFVSGGPPTFGHPLSVSASFAAPCSQRGTPAGGSFLSPAQSWLKTYFPSENAVNSRSSLEPVILPGLPSASSPSGCVPAFPTFFPVPVGPTPLSGVAAPCRSLAKPQPASRLQLGEEPEGREAARTGRGGLFPSLGAPVTMPPPPASVATPTAAESANGGAAAPVAPSPSGNAGPMRSQLRADAVEFRPAATTAAVVPGSFKGASGGVQAAPPAAPAGGVQHSGAAGATPASPSSMGLSGVNNGATPASPSSATTYNSTHQFNRNAQEFVPGRPFVVYPSSPSPPGAPPPPMAGALARSAPAQAAGLGPATAPGATQNVGVPPVPGV…	0	233.27	27	53	104	53	2668	272.9	9.25	258.89	53	0.988	1.003	1	0.999	0.987	1.002	0.999	0.991	0.992	1.01	-0.02	0	0	0	-0.02	0	0	-0.01	-0.01	0.01	0.424053	0.888649	0.99722	0.967854	0.334985	0.33992	0.60208	0.585067	0.575078	0.33731	0.889498	0.955013	0.998321
FALSE	High	Master Protein	TGGT1_298610-t26_1-p1	transcript=TGGT1_298610-t26_1 | gene=TGGT1_298610 | organism=Toxoplasma_gondii_GT1 | gene_product=GYF domain-containing protein [Source:UniProtKB/TrEMBL;Acc:S7ULJ6] | transcript_product=GYF domain-containing protein | location=TGGT1_chrXI:6511021-6521705(+) | protein_length=2331 | sequence_SO=chromosome | SO=protein_coding_gene | is_pseudo=false	MYQPRPFTGVNRARAAAAASANQSGSSGSSTRGVRTPTASYAQQQTPAVVSSGESSTAASNLCLGSGGVLADTADFPFLVNPSRSPAAHSSAPADVASPSSQKGRRGAESGTAAEPSTPSNPWQKAGAVAQQPPRQTAPTTSSIPVSSLTGFFPGASSRAGVADSHAALQRNLQRMQLPPAPSSRNAGSTSSGRAGGAWGTASDGSGPSGEVAAGGSLEGPSSGGASGRSRGGTGGASPSPTGSRPSLGSSSSRTFAGDLFGAALRSGSRGGESKGTSEGAAASGGSLVEGPGVRAGNSGSGSAAGVEREEGVGGPSAGKENPCYGKLPLLTLWRSARSTNDAAAARVLATVAPGQVTEEQQLLFRLVVREAPAAGAGPAGAPGLGAPHHGAGQSGSGG…	0	230.094	26	50	100	50	2331	237.8	9.17	285.8	50	0.93	0.93	0.923	1.077	1.001	1.001	0.993	0.998	1.005	0.981	-0.1	-0.1	-0.12	0.11	0	0	-0.01	0	0.01	-0.03	0.393861	0.312902	0.292538	0.348626	0.856337	0.863404	0.41005	0.920873	0.686958	0.382506	0.889498	0.902448	0.922119
FALSE	High	Master Protein	TGGT1_294550-t26_1-p1	transcript=TGGT1_294550-t26_1 | gene=TGGT1_294550 | organism=Toxoplasma_gondii_GT1 | gene_product=Dynein heavy chain [Source:UniProtKB/TrEMBL;Acc:S7VWW7] | transcript_product=dynein heavy chain | location=TGGT1_chrIa:919161-949027(+) | protein_length=4974 | sequence_SO=chromosome | SO=protein_coding_gene | is_pseudo=false	MERQKIALSNFLLEICPALLNCSRQSLQSLLAKEGDRTLQTFLIEQQQVLVVGREPVAKKKNGTTSGAPGTDAANTERPEELPADENDEEEQFRLFVELGFAAHALTRAYSVAFLKRPGFSLEEQTSPEVAEDGEAASSPADAPARRKTIGQQLAVLCCGFGDDTESSLDVTQLYMQRGLAPMLNVALTQKETEGPGPGGAQAGNGSASGPAEEGAAEAAQNKAATSSLHQTVNKKMAELLLAVQQAQQNVDIPLIQLPVDPVIEETVKAAQAAGRKATVEDLGDYLHNTGYLIALQNHVNRWIKDIQKVCRMQRDASTGSAAEEVNFWEGMERAILRVEEQLKTPEAELTLQVLKQTRKVFATMTFEQDAGLKQASDMVASVNILIRDFPVNDLLGAT…	0	226.057	16	75	108	75	4974	558.3	5.73	236.84	75	0.874	0.889	0.88	1.121	0.979	0.996	0.986	0.993	1.008	0.973	-0.19	-0.17	-0.18	0.16	-0.03	-0.01	-0.02	-0.01	0.01	-0.04	0.510735	0.550411	0.509054	0.489543	0.60461	0.912634	0.631599	0.675611	0.850674	0.36396	0.889498	0.902448	0.922119
FALSE	High	Master Protein	TGGT1_228120-t26_1-p1	transcript=TGGT1_228120-t26_1 | gene=TGGT1_228120 | organism=Toxoplasma_gondii_GT1 | gene_product=hypothetical protein | transcript_product=hypothetical protein | location=TGGT1_chrX:469350-486422(+) | protein_length=3946 | sequence_SO=chromosome | SO=protein_coding_gene | is_pseudo=false	MEEDGGAPSSPCGVPATGGVEKAVAYQSEDMLGGEANIGCNTAHGVPDVQISPPSAGISPSPPSSGTPPLLGQAAGLDVVEANRSGDEADAAFSATRRPDSPASFMEGEDPDTPRSPTQQTTSPQPPLSPQPSLSPPLVSEVVDALYPESPRPGSGALTRGMCLSAGGPVSSGPPLSSTPPSPASSRSSSSPGGARVSSPVSAAPLVPTFPVPFAPERRAEPGRCRIREGQASSSRVDRYGDSVPAEKAGRGSPSFLERNAFDRETNSGPTGIGGHSPFFSPLQGAGVSSSAGGSGGSNRPQHPLVHASTPSWVKYGEEHYPEEAVPIEYQWVEDDGTCCCYVTDFLLYNKKGERLLQVETLDQDELADVALYGKLVHVALVHPPEALEARKHPTACQV…	0	223.894	20	62	83	62	3946	418	5.05	199.02	62	0.938	0.951	0.982	1.048	0.983	0.997	1.029	1.009	1.01	1.018	-0.09	-0.07	-0.03	0.07	-0.03	0	0.04	0.01	0.01	0.03	0.59202	0.549751	0.861298	0.655729	0.279961	0.898729	0.0650151	0.0811168	0.687194	0.297586	0.889498	0.902448	0.951531
FALSE	High	Master Protein	TGGT1_275650-t26_1-p1	transcript=TGGT1_275650-t26_1 | gene=TGGT1_275650 | organism=Toxoplasma_gondii_GT1 | gene_product=hypothetical protein | transcript_product=hypothetical protein | location=TGGT1_chrIII:288290-290923(+) | protein_length=877 | sequence_SO=chromosome | SO=protein_coding_gene | is_pseudo=false	MNPARDSICEPTSVKMVSEAPGVPSSPSTEVRTAALKAWRAWRKDNKGPLEEVLQNPAGYSLYKAMKSSAGGPVPNTFQQWLQQNEHAKRWLAWRQGCPGQLREVLADPEGWRLFSTMKREKGQPVPDTYEEWRDLPEHKIVVSRRTWSAWRRAHPGPLAATLADPEGWALYRQIKVSDGKDVPERYEDWVSHPTVRKQAAMEAWTQWRHEHPGQLAKVLADPQGWTLYKAMVECGDKRIEATYEEWMAKRDASPTSWAVWRKSHRGPLNEVLKDPAGWAAFTAYNTKKGVSLPATYEEWVQLPEQQKGAASFKWSSWRKTHKGPLAEVLADPEGWALYVNMLEKGSHARIHSSYAEWLEAYRAAKSPGSSAAQWRQWRKAHEGPLEQVLADPEGWKLY…	0	223.44	51	37	134	37	877	101.1	9.19	387.47	37	1.06	1.06	1.065	0.936	0.993	0.992	0.997	1	1.002	0.982	0.08	0.08	0.09	-0.1	-0.01	-0.01	0	0	0	-0.03	0.528091	0.552518	0.398554	0.374376	0.773158	0.796763	0.341887	0.990474	0.732649	0.698207	0.889498	0.902448	0.922119
FALSE	High	Master Protein	TGGT1_273090-t26_1-p1	transcript=TGGT1_273090-t26_1 | gene=TGGT1_273090 | organism=Toxoplasma_gondii_GT1 | gene_product=Cell division protein CDC48CY [Source:UniProtKB/TrEMBL;Acc:A0A125YX44] | transcript_product=cell division protein CDC48CY | location=TGGT1_chrVIII:3661986-3671254(-) | protein_length=811 | sequence_SO=chromosome | SO=protein_coding_gene | is_pseudo=false	MAGGIRRPQSVPAEKKEESQKKRSPNRLIVEEAINDDNSVVALNPAKMEELQIFRGDTVLLKGKMRHDTVCVVLADQDLDEGKIRLNKVVRKNLRVKLGDMVHVSACPDCPYGKRIHVLPLDDTIEGITGNLFDIYLKPYFMEAYRPVRKGDLFLVRGGFRPVEFKESLKIVVGVDPGEFCIVAPDTVIHCEGDPVKREEEERLDEVGYDDIGGCRKQMAQIREMIELPLRHPTLFKTLGVKPPRGVLLYGPPGSGKTLIAKAVANETGAFFFLINGPEVMSKMAGEAESNLRRAFEEAEKNAPAIIFIDEIDSIAPKREKTNGEVERRVVSQLLTLMDGLKGRGQVVVIGATNRQNSIDPALRRFGRFDREIDIGVPDDNGRLEILRIHTRNMKLAND…	0	223.381	47	32	154	27	811	89.3	5.11	404.87	32	0.959	0.988	0.965	1.039	0.996	1.027	1.003	1.005	1.004	0.967	-0.06	-0.02	-0.05	0.05	-0.01	0.04	0	0.01	0.01	-0.05	0.13223	0.460689	0.126592	0.19168	0.391006	0.443652	0.664803	0.522732	0.22024	0.518184	0.889498	0.902448	0.922119
FALSE	High	Master Protein	TGGT1_318440-t26_1-p1	transcript=TGGT1_318440-t26_1 | gene=TGGT1_318440 | organism=Toxoplasma_gondii_GT1 | gene_product=Helicase associated domain (Ha2) protein [Source:UniProtKB/TrEMBL;Acc:S7UJM8] | transcript_product=helicase associated domain (ha2) protein | location=TGGT1_chrIV:1264045-1277404(-) | protein_length=2234 | sequence_SO=chromosome | SO=protein_coding_gene | is_pseudo=false	MAPPHARRGRGDGPSRGRGDRRRDRDGFSADAPLCAPADRAEANVSADLTSPGVPSSAPVGRRSSAAPQGLSGHASRGRDSPLLPRCSASAAGTRKGSAPDDGDNDREDALPVSSGVPSGVSTVPTGGGRSERAFPMARAFATGLTNRTPAGRGRGGGRAPGGSRRRLPETTQVPGQAVRHGSEAQSSQLSTPSSLLSHVSVEPSLCGGQMPREAQTGPPAATPHAPVRPAGPLGAGRSSSEGLASSESSAPLTASASSYFSVPPASETPAKGAMAPVEELPIMRYKEAILDHIREHSVTCIQGETGCGKSTRVPRFLLEEDLRQSRERREGPETPEGVMPRRLNAIVTQPRRLACIALARRVAQELEEPLGRSVGYRISGDAVTSKETKVCFVTTGYF…	0	220.677	26	44	90	44	2234	236.8	8.97	260.36	44	0.937	0.933	0.908	1.085	1.017	1.012	0.986	1.019	1.003	1.002	-0.09	-0.1	-0.14	0.12	0.02	0.02	-0.02	0.03	0	0	0.509446	0.484995	0.326497	0.423409	0.121654	0.108844	0.382473	0.443289	0.852015	0.839443	0.889498	0.902448	0.922119
FALSE	High	Master Protein	TGGT1_313270-t26_1-p1	transcript=TGGT1_313270-t26_1 | gene=TGGT1_313270 | organism=Toxoplasma_gondii_GT1 | gene_product=hypothetical protein | transcript_product=hypothetical protein | location=TGGT1_chrXI:3183953-3196338(+) | protein_length=2799 | sequence_SO=chromosome | SO=protein_coding_gene | is_pseudo=false	MSGTGGAGSGPLGSAGGARGGSKSSAPRPVKIAAVSLVDLKEQASKTPTPSRGWGVIPQPATSVESSGMSSSLFPPVSALKQQFHGSASSSSQANAVGGRTSSSFARAVRGLRNLKEETGDEISRGDGEKEAQPQERDGECEKEERGQNEGDVKGQANAGAELGDRTKPTAAETQQPGGSLPNDTNVTFEKGGEEREKDSSQKHEGEKTKEEPRQDASGTVPARSREDESIAATGAISLSKLITASRKVGISVSVRGRAVNTAAGTVKSSGSAWKSGVSAAASSGASSSAPFSSRAASSSGPASSLYAARAGGAAPATGSVDDEAFPDLMKSAEQVKLEAQKEKDRQKRTKEALRRVEKDENGSVSQPQTRRLGLQELFDLTSEGGALSSLGDKTGLGD…	0	218.439	25	51	87	51	2799	281	9.51	212.85	51	0.971	0.972	0.99	1.038	1.008	1.01	1.028	0.994	1.016	1.002	-0.04	-0.04	-0.01	0.05	0.01	0.01	0.04	-0.01	0.02	0	0.542322	0.510372	0.364555	0.4689	0.0366438	0.314978	0.500255	0.465948	0.64942	0.909534	0.889498	0.902448	0.922119
FALSE	High	Master Protein	TGGT1_235470-t26_1-p1	transcript=TGGT1_235470-t26_1 | gene=TGGT1_235470 | organism=Toxoplasma_gondii_GT1 | gene_product=Myosin motor domain-containing protein [Source:UniProtKB/TrEMBL;Acc:S7W634] | transcript_product=myosin A | location=TGGT1_chrX:4773284-4778894(+) | protein_length=831 | sequence_SO=chromosome | SO=protein_coding_gene | is_pseudo=false	MASKTTSEELKTATALKKRSSDVHAVDHSGNVYKGFQIWTDLAPSVKEEPDLMFAKCIVQAGTDKGNLTCVQIDPPGFDEPFEVPQANAWNVNSLIDPMTYGDIGMLPHTNIPCVLDFLKVRFMKNQIYTTADPLVVAINPFRDLGNTTLDWIVRYRDTFDLSKLAPHVFYTARRALDNLHAVNKSQTIIVSGESGAGKTEATKQIMRYFAAAKTGSMDLRIQNAIMAANPVLEAFGNAKTIRNNNSSRFGRFMQLDVGREGGIKFGSVVAFLLEKSRVLTQDEQERSYHIFYQMCKGADAAMKERFHILPLSEYKYINPLCLDAPGIDDVAEFHEVCESFRSMNLTEDEVASVWSIVSGVLLLGNVEVTATKDGGIDDAAAIEGKNLEVFKKACGLLF…	0	215.434	48	39	187	39	831	93.3	8.16	497.76	39	1.059	1.051	1.051	0.936	0.991	0.984	0.984	0.998	1	0.993	0.08	0.07	0.07	-0.09	-0.01	-0.02	-0.02	0	0	-0.01	0.611055	0.674956	0.691529	0.542353	0.405135	0.46362	0.578	0.674997	0.991668	0.832757	0.889498	0.902448	0.922119
FALSE	High	Master Protein	TGGT1_247550-t26_1-p1	transcript=TGGT1_247550-t26_1 | gene=TGGT1_247550 | organism=Toxoplasma_gondii_GT1 | gene_product=Heat shock protein HSP60 [Source:UniProtKB/TrEMBL;Acc:A0A125YNH1] | transcript_product=heat shock protein HSP60 | location=TGGT1_chrXII:3342084-3346052(-) | protein_length=575 | sequence_SO=chromosome | SO=protein_coding_gene | is_pseudo=false	MLARASARVAKCNPGNVFQVRHASSKEIRFGCDARNQMLAGCNRLADAVGVTLGPKGRNVVIEQPYGSPKITKDGVTVAKSIELGNRMMNLGAQLVKQVASTTNDIAGDGTTTATLLARAIFREGCKAVDAGMNPMDLLRGINLAVEKVLAHLNSVTKNVTTSEEIFNVATISANGDKVIGKLIADAMEKVGRDGTITVSEGKTLTHELELVEGLKFDRGYISPYFITNSKEQKVELEKPFVLLYDKRISSVKSILPVLEFIVQNQGSLLIIAEDVDSEALATMVVNKLRLGLKICAVKAPGFGDHRKAMLHDIAVMTGGQVVTEETGGSLEDAHQMPQMLGRAKSVTVTKDTTLVIEGGGEKATIDERCDQIRVSMEQTHSDYEKEKLQERLARMTGG…	0	213.562	64	26	120	25	575	60.9	5.97	394.79	26	1.018	1.002	1.013	1.003	1.021	1.006	1.016	1.037	1.033	1.042	0.03	0	0.02	0	0.03	0.01	0.02	0.05	0.05	0.06	0.444157	0.817732	0.238737	0.484421	0.450923	0.462648	0.0682023	0.0472345	0.0831624	0.227447	0.889498	0.929166	0.922119
FALSE	High	Master Protein	TGGT1_313410-t26_1-p1	transcript=TGGT1_313410-t26_1 | gene=TGGT1_313410 | organism=Toxoplasma_gondii_GT1 | gene_product=Proteasome 26S regulatory subunit [Source:UniProtKB/TrEMBL;Acc:S7W860] | transcript_product=proteasome 26S regulatory subunit | location=TGGT1_chrXI:3312986-3323185(+) | protein_length=1091 | sequence_SO=chromosome | SO=protein_coding_gene | is_pseudo=false	MANDENKKLVAIQASAKDPAQTGKEGKEKNGDKKKKVEDELTEEDKKIKEDMELLVERLQDPEPGVVALALQTLSVQLKAATSSMTSVPKPLKFLRPHIPVLIAHYHRLAPDDKIKPDFAMVLAVLCTTCGDGQRRSLHFCLEGGCRDIASWGFEFLRNLAGEVAAAFADIHGEEKKAGAVEEDLLASSDAAAGSPESPAPGETKAGEAKKPAEEEAKTKKPSLALQISMVVPLPTLAQLNAVVDLIVPYYMTHNAECDAIDLLSEVERVESVAAHVDSNNFQRVTLYLLAMANYAASLEEYTRVLGVAYTILLDQKQWFDAMRVALKMPNSDAEKTEKIQAVVEQCRAAGDPLMVKQLALLLGRQGVDFDFEDEQTQRLNSGEELSNFFLLLAKEMDV…	0	213.208	42	42	107	42	1091	117.6	5.1	275.39	42	1.027	1.029	1.039	0.981	1.008	1.01	1.019	1.021	0.998	1.012	0.04	0.04	0.05	-0.03	0.01	0.01	0.03	0.03	0	0.02	0.753391	0.670504	0.552064	0.690974	0.836811	0.622422	0.280156	0.0244439	0.860626	0.649871	0.898123	0.902448	0.922119
FALSE	High	Master Protein	TGGT1_249390-t26_1-p1	transcript=TGGT1_249390-t26_1 | gene=TGGT1_249390 | organism=Toxoplasma_gondii_GT1 | gene_product=ELFV_dehydrog domain-containing protein [Source:UniProtKB/TrEMBL;Acc:S7W941] | transcript_product=glutamate/leucine/phenylalanine/valine dehydrogenase family protein | location=TGGT1_chrXII:4441593-4452115(+) | protein_length=1206 | sequence_SO=chromosome | SO=protein_coding_gene | is_pseudo=false	MVHVSASLPFSFFPRLFLSQPRGTRSIWICRATQEACLPASHSRAVSGASLPFFRPAFAHIVPPLSLSLSARSSDSLSRVRPGLASGSLLCAKMETTLNGGGRAPSAVFHPSTSAPAICFPKRHASFSCYDGASGTSPSTTSGGSAGDLGAPVSRSLLGGRPVGKLGDSTLFGTVDLTATSEFRPMSQKYAAQYEEVKQILAQRGDLSKRVISANADAYYNHLGLNEYYFQTATAQTVASNLACVIAAKILNEFSHTDYFPQIQQERDGEVFLLARASLRNRKASQNFQVEREIEKKFLGLSGKTTPYRMQCYRSSGSFFDDPADENERLRTYFLQQPEYCAETTKDGVDPSETDLSKLLDVYFFANKRNTATAEIYRRLNEEVVRDSSGQNLFINVVP…	0	205.638	36	36	125	36	1206	135.4	7.37	363.52	36	0.963	0.96	0.964	1.047	1.009	1.006	1.01	1.022	1.001	1.012	-0.05	-0.06	-0.05	0.07	0.01	0.01	0.01	0.03	0	0.02	0.169123	0.307575	0.229158	0.252354	0.521054	0.198661	0.330591	0.0208498	0.855603	0.220437	0.889498	0.902448	0.922119
FALSE	High	Master Protein	P21333	Filamin-A OS=Homo sapiens (Human) OX=9606 GN=FLNA PE=1 SV=4	MSSSHSRAGQSAAGAAPGGGVDTRDAEMPATEKDLAEDAPWKKIQQNTFTRWCNEHLKCVSKRIANLQTDLSDGLRLIALLEVLSQKKMHRKHNQRPTFRQMQLENVSVALEFLDRESIKLVSIDSKAIVDGNLKLILGLIWTLILHYSISMPMWDEEEDEEAKKQTPKQRLLGWIQNKLPQLPITNFSRDWQSGRALGALVDSCAPGLCPDWDSWDASKPVTNAREAMQQADDWLGIPQVITPEEIVDPNVDEHSVMTYLSQFPKAKLKPGAPLRPKLNPKKARAYGPGIEPTGNMVKKRAEFTVETRSAGQGEVLVYVEDPAGHQEEAKVTANNDKNRTFSVWYVPEVTGTHKVTVLFAGQHIAKSPFEVYVDKSQGDASKVTAQGPGLEPSGNIAN…	0	204.52	22	46	83	41	2647	280.6	6.06	237.22	46	0.974	0.972	0.979	1.039	1.012	1.01	1.017	1.04	1.028	1.05	-0.04	-0.04	-0.03	0.05	0.02	0.01	0.02	0.06	0.04	0.07	0.757579	0.649293	0.796204	0.59987	0.524012	0.382947	0.369032	0.295867	0.52374	0.497609	0.898988	0.902448	0.933895
FALSE	High	Master Protein	TGGT1_251780-t26_1-p1	transcript=TGGT1_251780-t26_1 | gene=TGGT1_251780 | organism=Toxoplasma_gondii_GT1 | gene_product=Heat shock protein [Source:UniProtKB/TrEMBL;Acc:S7V012] | transcript_product=heat shock protein | location=TGGT1_chrXII:5504595-5509577(-) | protein_length=728 | sequence_SO=chromosome | SO=protein_coding_gene | is_pseudo=false	MASMAAGASLAYRASYCSGAKARSISSFTSLGRACVETQMTPAAAASLRPSRFLFSSLAQNAKSSSPFSAGKLRSGMNTTYERTGVLSSFSRYLSTSAPRMNGKARGDVVGIDLGTTNSCVAVMEGSQPKVIENSEGMRTTPSIVAFTSDGQRLVGIVAKRQAVTNPENTVFATKRLIGRRYDEDAIKKEKEILPYKIVRASNGDAWVEAQGKSYSPSQISAFILTKMKETAEAYIGRPVKQAVITVPAYFNDSQRQATKDAGKIAGLEVLRIINEPTAAALAFGMDKDDGKTIAVYDLGGGTFDISILEILGGVFEVKATNGNTSLGGEDFDQKILQHLIDEFKKAQGIDLTKDKLALQRLREAAETAKIELSSKVQTEVNLPFITADQTGPKHLQVK…	0	202.85	51	33	124	32	728	78.2	7.17	356.8	33	1.075	1.063	1.065	0.93	0.999	0.988	0.99	1.008	1.007	0.994	0.1	0.09	0.09	-0.11	0	-0.02	-0.01	0.01	0.01	-0.01	0.588944	0.626466	0.633748	0.528584	0.971248	0.524068	0.678254	0.621676	0.656089	0.326012	0.889498	0.902448	0.922119
FALSE	High	Master Protein	TGGT1_268370-t26_1-p1	transcript=TGGT1_268370-t26_1 | gene=TGGT1_268370 | organism=Toxoplasma_gondii_GT1 | gene_product=Non-specific serine/threonine protein kinase [Source:UniProtKB/TrEMBL;Acc:S7WDQ9] | transcript_product=non-specific serine/threonine protein kinase | location=TGGT1_chrVIII:6481671-6517585(-) | protein_length=8429 | sequence_SO=chromosome | SO=protein_coding_gene | is_pseudo=false	MKDGAAGDPPPSGPSGPSGHPSLPERPSTFASAAPGQEQPSQVLSYFPSAGPGSGSASHHLGSTPSLPAVAAAPFPLPCETGLHHPSFSTPPGFAEAAPREYVSETGHVSSSAPISSTASLASSGHSAVSGPPEPLPGSLSAPAYPGTPVPAVMTPASLPGTGPAGPAEGNLMSGSRLPEAPAFPGVPQANLVAAGLPSGGLPPPAAFPTAREIASGVSSAAGLDPGSGPVAGPGCVAMAKSSPAASEPHLSASEAQPHKPPVRDEAGRSGEDTTRRKNMFPSSLTTLRVLTEFLRAAPAMCDDPNVPEIRGSELKDGSPFLLSDLSASASLSSSQFLSARVRAVRKCIGLLAENRGSEASCAAAVVLPAALLLLRRVTPVMKEGEVYVFRQSLLTLLR…	0	201.744	8	54	73	54	8429	903.6	6.39	168.88	54	0.873	0.883	0.871	1.15	1.004	1.015	1.001	0.983	1.005	0.994	-0.2	-0.18	-0.2	0.2	0.01	0.02	0	-0.03	0.01	-0.01	0.580678	0.52046	0.52033	0.391585	0.970771	0.735297	0.98512	0.787475	0.936486	0.848178	0.889498	0.902448	0.922119
FALSE	High	Master Protein	TGGT1_226960-t26_1-p1	transcript=TGGT1_226960-t26_1 | gene=TGGT1_226960 | organism=Toxoplasma_gondii_GT1 | gene_product=Pyrophosphate--fructose 6-phosphate 1-phosphotransferase [Source:UniProtKB/TrEMBL;Acc:A0A125YKV5] | transcript_product=phosphofructokinase PFKII | location=TGGT1_chrX:1093641-1104060(-) | protein_length=1225 | sequence_SO=chromosome | SO=protein_coding_gene | is_pseudo=false	MTFLSFFKCAKGTTSAHPEADAVETFFESQASSQSHLFSPQLADEATPNEVARRHFKPVLPPVFSSPTGVVTVPCNDTDLVNKQDEVNNAPHVLSAQDQDILASLFPNTINTNFCLLAPASGDRQASSEPLRVGVVLSGGQAAGGHNVICGIFDYVKRVNPASTVFGFLGGPHGVFSHEYVELTEAIIDKYRNMGGFDMIRSGRHKIETDEQKQKSLEICEKLQLNGLVVIGGDDSNTNAAILAEYFKSKGSSTSVCGCPKTIDGDLKNRFVEISFGFDTACKTYCQQIGNLMRNAMTGGNTYHFVRLMGRSASLITLECALQTHPNYTFIGEEVMAKKQSLRQLVEALVDLVEARYAKGKQYGVVLLPEGLIEFIPEVGVLINEINHIVAAGDFEVSK…	0	200.62	35	36	135	35	1225	131.3	6.24	359.63	36	1.01	1.006	1	0.989	0.999	0.995	0.989	1.005	0.998	0.979	0.01	0.01	0	-0.02	0	-0.01	-0.02	0.01	0	-0.03	0.871381	0.890878	0.995693	0.752643	0.953174	0.604928	0.71451	0.321602	0.731671	0.522597	0.944059	0.955873	0.997999
FALSE	High	Master Protein	TGGT1_226830-t26_1-p1	transcript=TGGT1_226830-t26_1 | gene=TGGT1_226830 | organism=Toxoplasma_gondii_GT1 | gene_product=DnaK family protein [Source:UniProtKB/TrEMBL;Acc:S7UXF0] | transcript_product=DnaK family protein | location=TGGT1_chrX:1215623-1218481(-) | protein_length=952 | sequence_SO=chromosome | SO=protein_coding_gene | is_pseudo=false	MALPAFEGVSPCVGGDRRVSPSGSSVRFSSHSSRLGCFFFAFCFLSVSLFSPLGAKAQVVGLDLGSEFVKVALVAAGRPIEILLNPASKRKTNNAVSFADEEKRELGDEGAAQAAKKPDRVFLHPNLLLGVNATDFGLVDVTADPDSAFLPLALKEKLLPSGYPHDYYPYRLFMDRRRHSVAVLAKDGVYLPAELLTASMLAFVKKLATQAAGVDNEKTLGCVISVPCRYTQRQRQALRDAVEIAGMHAVAFHHHSVTAAVQHALDLPTNTTATKLFYDVGSSTIDVGVVRFAPVQLPSKKEVLQVQLLACESMSGAGGHHVDLAIAEKMRGAFERRYGAGKSLLGVPRALKKLVKQAVMAKHVLSANKQTQFRVEGLHNDVDFNEPFERMHLEALLEE…	0	199.562	41	35	108	35	952	104.9	5.95	337.29	35	1.019	1.021	1.024	0.994	1.013	1.015	1.017	1.002	1.008	1.015	0.03	0.03	0.03	-0.01	0.02	0.02	0.02	0	0.01	0.02	0.382039	0.573561	0.00900239	0.647452	0.13379	0.532662	0.336789	0.8854	0.191492	0.482515	0.889498	0.902448	0.922119
FALSE	High	Master Protein	TGGT1_273560-t26_1-p1	transcript=TGGT1_273560-t26_1 | gene=TGGT1_273560 | organism=Toxoplasma_gondii_GT1 | gene_product=Kinesin motor domain-containing protein [Source:UniProtKB/TrEMBL;Acc:S7V3F2] | transcript_product=putative kinesin heavy chain | location=TGGT1_chrVIII:3381230-3400326(-) | protein_length=1641 | sequence_SO=chromosome | SO=protein_coding_gene | is_pseudo=false	MDGKGNRDPGALLDATGMDDLAGLDDNKEESIRVCTRMRPLFPKEVEARHVKAWRVERSSLELIVEPPSQLEMEESRQTAAGKAVLGTMKKAAEKSQGQKDIIQRHYVFDRCFDDNTHNSEVFDYVAKDIVLDCFKGINGCVFAYGQTGSGKTHSIMGVADDPGILPRSLAEFFDCVTDPSLLKEEEEELKRQQGDEGDRNGKDDHHDDAETENTEYLMRVSYVEIYLERVNDLLQESAKGGAVENLEVKEDPKRGFVVVGLHEETVATMEEAMSLIAAAEQRRHFARTNFNETSSRSHVVFSITLESTRTFEDGSNISRRGELKIVDLAGNEKAGRASEGVENAKLVMEEGKAINKSLFLLSEVISKLSKQAQQQAEGKLKKGEKEVYIPWRDSKLTR…	0	198.479	31	46	105	46	1641	181.3	6.4	235.76	46	1.036	1.016	1.048	0.965	1	0.98	1.011	0.994	0.983	0.998	0.05	0.02	0.07	-0.05	0	-0.03	0.02	-0.01	-0.03	0	0.527778	0.786419	0.403268	0.506914	0.937149	0.262734	0.111966	0.704023	0.23692	0.757014	0.889498	0.918214	0.922119
FALSE	High	Master Protein	TGGT1_286580-t26_1-p1	transcript=TGGT1_286580-t26_1 | gene=TGGT1_286580 | organism=Toxoplasma_gondii_GT1 | gene_product=Hydrolase_4 domain-containing protein [Source:UniProtKB/TrEMBL;Acc:S7UP07] | transcript_product=hypothetical protein | location=TGGT1_chrV:1631039-1633906(-) | protein_length=955 | sequence_SO=chromosome | SO=protein_coding_gene | is_pseudo=false	MAPPRDVTPVSPRSPAETDTAVCSSVICGSETKLEEWPYPRLPPFSIDYIELRYPKVAIFHNVRDQPIVRYTWTTTTGPARGAVVLLHDQGTHTMFEWLKHLPPLSIEERQQMEEDTEATEVEKKEFMRLRKASHYEDSWVQKFNDAGLDVHAIDLQGHGLSKVVEGKNYELPSSFDEFAEDACWLLEEVCRNSTLPIFIMGQGLGATIAARAVEMLARQGKLGKPHVPPAKPADAVGASEQSTTTGTSQSSEAGREVPGMHYATDPQYCLHRGKGKKEVPVEHITVQARPIPIAGLVLLSPLLTLKEITPEEMRKGKGKHTEGIMTRIARCFGSTRDSSHPLGGLMGFRMHQQNPLMPEYNVWYKNDTMTIKGLTPQTMYTQIAHGIDSAMDDARWLL…	0	196.005	41	35	125	35	955	107.2	5.63	363.62	35	0.975	0.99	0.988	1.011	0.986	1.001	0.999	1.001	0.999	0.983	-0.04	-0.02	-0.02	0.02	-0.02	0	0	0	0	-0.02	0.515692	0.55969	0.535389	0.38922	0.589998	0.917414	0.871622	0.936874	0.960437	0.384911	0.889498	0.902448	0.922119
FALSE	High	Master Protein	TGGT1_209030-t26_1-p1	transcript=TGGT1_209030-t26_1 | gene=TGGT1_209030 | organism=Toxoplasma_gondii_GT1 | gene_product=Actin ACT1 [Source:UniProtKB/TrEMBL;Acc:A0A125YH17] | transcript_product=actin ACT1 | location=TGGT1_chrIb:1014618-1016180(+) | protein_length=376 | sequence_SO=chromosome | SO=protein_coding_gene | is_pseudo=false	MADEEVQALVVDNGSGNVKAGVAGDDAPRAVFPSIVGKPKNPGIMVGMEEKDCYVGDEAQSKRGILTLKYPIEHGIVTNWDDMEKIWHHTFYNELRVAPEEHPVLLTEAPLNPKANRERMTQIMFETFNVPAMYVAIQAVLSLYSSGRTTGIVLDSGDGVSHTVPIYEGYALPHAIMRLDLAGRDLTEYMMKILHERGYGFTTSAEKEIVRDIKEKLCYIALDFDEEMKAAEDSSDIEKSYELPDGNIITVGNERFRCPEALFQPSFLGKEAAGVHRTTFDSIMKCDVDIRKDLYGNVVLSGGTTMYEGIGERLTKELTSLAPSTMKIKVVAPPERKYSVWIGGSILSSLSTFQQMWITKEEYDESGPSIVHRKCF	0	195.919	49	16	236	13	376	41.9	5.16	704.75	16	0.982	0.996	0.989	1.008	0.99	1.004	0.997	1.014	1.014	1.019	-0.03	-0.01	-0.02	0.01	-0.02	0.01	0	0.02	0.02	0.03	0.669107	0.887645	0.510936	0.834055	0.148773	0.707399	0.889286	0.565781	0.710005	0.646044	0.889498	0.954848	0.922119
FALSE	High	Master Protein	TGGT1_310670-t26_1-p1	transcript=TGGT1_310670-t26_1 | gene=TGGT1_310670 | organism=Toxoplasma_gondii_GT1 | gene_product=Alpha-1,4 glucan phosphorylase [Source:UniProtKB/TrEMBL;Acc:S7UT34] | transcript_product=putative glycogen phosphorylase 1 | location=TGGT1_chrXI:1474522-1478513(+) | protein_length=912 | sequence_SO=chromosome | SO=protein_coding_gene | is_pseudo=false	MANAADENVFANDSSYHWEMRRKASFSKLTGAVPRAIPGMYNEEDPHADEKKEKLWKLMETYISSDIHSIQRSIVNHVEYTCARTRFNCDPESCYRASAFSVRDRLIETLNDTNAYFHEKDCKRAYYLSLEFLLGRAFQNALVNLDIENNYKKALAELGFNLEQLYEFEHDPALGNGGLGRLAACFLDSMATVNLPCWGYGIRYTYGIFEQKIVNGRQVEHPDYWLTMSNPWEIERPDCTYAVRFYGSVKEYRDVQTGRMRSKWVEGEIVQAMAYDNPIPGFDTYNTINLRLWKAAPGKEFDFHLFNVGRYLESVRERQRAESISAVLYPNDNTLEGKELRLKQQYFFVCATVQDVLRRFKKVSNRDWNDLPSKVQMQLNDTHPTIAIPELMRILLDVE…	0	195.177	47	37	128	37	912	105.4	6.58	349.19	37	1.012	1.035	1.033	0.98	0.991	1.014	1.013	1.013	0.999	1.009	0.02	0.05	0.05	-0.03	-0.01	0.02	0.02	0.02	0	0.01	0.164676	0.341627	0.39787	0.151913	0.134302	0.53136	0.624093	0.151427	0.856073	0.413332	0.889498	0.902448	0.922119
FALSE	High	Master Protein	P02751	Fibronectin OS=Homo sapiens (Human) OX=9606 GN=FN1 PE=1 SV=5	MLRGPGPGLLLLAVQCLGTAVPSTGASKSKRQAQQMVQPQSPVAVSQSKPGCYDNGKHYQINQQWERTYLGNALVCTCYGGSRGFNCESKPEAEETCFDKYTGNTYRVGDTYERPKDSMIWDCTCIGAGRGRISCTIANRCHEGGQSYKIGDTWRRPHETGGYMLECVCLGNGKGEWTCKPIAEKCFDHAAGTSYVVGETWEKPYQGWMMVDCTCLGEGSGRITCTSRNRCNDQDTRTSYRIGDTWSKKDNRGNLLQCICTGNGRGEWKCERHTSVQTTSSGSGPFTDVRAAVYQPQPHPQPPPYGHCVTDSGVVYSVGMQWLKTQGNKQMLCTCLGNGVSCQETAVTQTYGGNSNGEPCVLPFTYNGRTFYSCTTEGRQDGHLWCSTTSNYEQDQKYS…	0	194.314	20	37	87	37	2477	272.2	5.5	242.73	37	0.969	0.988	1.027	1.032	1	1.02	1.06	1.098	1.083	1.042	-0.05	-0.02	0.04	0.05	0	0.03	0.08	0.13	0.11	0.06	0.816725	0.929312	0.690993	0.813175	0.979038	0.167882	0.48179	0.0955133	0.174473	0.173897	0.920569	0.969208	0.922119
FALSE	High	Master Protein	TGGT1_205440-t26_1-p1	transcript=TGGT1_205440-t26_1 | gene=TGGT1_205440 | organism=Toxoplasma_gondii_GT1 | gene_product=T-complex protein 1 subunit gamma [Source:UniProtKB/TrEMBL;Acc:A0A125YIY0] | transcript_product=CCT chaperonin gamma subunit | location=TGGT1_chrVIIa:1309659-1315491(+) | protein_length=556 | sequence_SO=chromosome | SO=protein_coding_gene | is_pseudo=false	MIRPQGPVLVLKQNTKREQGRKAQLANIQASKAIADIVRTTLGPSSMLKMLLDPLGGIVLTNDGNAILREVDVLHPAAKTMIELSRTQDEEVGDGSTSVVVLAGEVLAGAVDLLEKQQLHPSVISHGYVLALEDTLKYMNEIAIDVDVSDDAKLRQVVDACLNTKFSSRWEGRISQMAIDAVRKVEIKLPNGKKEIDIKRYAKVEKIPGGDLEESRVLDGVMVNKDVTHAKMRRYIANPKVLLLDCPLEYKKGESQTYVEITKEDEWAKLLEQEEKEVRAMCDDIIASGCNLVITEKGVSDLAQHFLVKAGISCIRRVRKTDNNRIARVTGATIVNRTEEITKEDVGTKCGLFEVKKIGDEYFTFLTQCKEKGACTVLLRGGSKDVLNEVERNLQDAMN…	0	193.994	58	32	98	32	556	60.7	5.94	255.12	32	0.978	0.976	0.977	1.011	0.989	0.987	0.987	1	1.004	0.979	-0.03	-0.03	-0.03	0.02	-0.02	-0.02	-0.02	0	0.01	-0.03	0.195884	0.397995	0.108001	0.0706888	0.300486	0.602266	0.138093	0.831541	0.675844	0.303283	0.889498	0.902448	0.922119
FALSE	High	Master Protein	TGGT1_311230-t26_1-p1	transcript=TGGT1_311230-t26_1 | gene=TGGT1_311230 | organism=Toxoplasma_gondii_GT1 | gene_product=hypothetical protein | transcript_product=hypothetical protein | location=TGGT1_chrXI:1844321-1862670(+) | protein_length=4603 | sequence_SO=chromosome | SO=protein_coding_gene | is_pseudo=false	MSAFRQAADFLSVCFMALERVCIPRSRHSSPASFVLPFLVLSVAGLCSPAISAWTWLLLTVAGLILLSIHSLGLLLTSDRDASSCDSSPFESACVTRCASTSDVLSFDSLASRSSSRAAFASDACGRLASLCHVRAFSTPHLESQVSAGTDPPEKPSASAQTAPPSPRLCRQRSGVSPPPLAIRSCSDSPSVAPSSPPLAFFSYEELNPNRTPGTEEDRSEAARVEGAEESFLACVPEPSEPSPISDTETSCAPVCARSVARDDTPNRSGCASAFPLGLFSTVEPSPSVTGPSAAGKTSQAASEECAAVCLPRATPAVSVECEDAESEGTETLESSPQPVSLLFTDRFSHAAPADIPPPLEAPAGGSATSHASKGVASLDARTLEGSVSFIGCLPSGTR…	0	193.341	11	39	93	39	4603	494.5	4.88	250.36	39	0.967	0.947	0.968	1.032	0.999	0.978	1	1.008	0.977	0.959	-0.05	-0.08	-0.05	0.05	0	-0.03	0	0.01	-0.03	-0.06	0.555174	0.549749	0.754937	0.729547	0.971584	0.196399	0.967416	0.579252	0.280625	0.405648	0.889498	0.902448	0.926621
FALSE	High	Master Protein	TGGT1_231640-t26_1-p1	transcript=TGGT1_231640-t26_1 | gene=TGGT1_231640 | organism=Toxoplasma_gondii_GT1 | gene_product=Alveolin domain containing intermediate filament IMC1 [Source:UniProtKB/TrEMBL;Acc:A0A125YFV6] | transcript_product=alveolin domain containing intermediate filament IMC1 | location=TGGT1_chrVIII:1511977-1514752(+) | protein_length=609 | sequence_SO=chromosome | SO=protein_coding_gene | is_pseudo=false	MFKDCADPCSDCCQPAEQQRGQATLPSHVVLPQTSDSPAIHVTAEASQRLSSPRALQQLHGTQESVRSVTLEERADRSRTVPIGEETERQWVAITAYQPIDTVTKTVEVPVVRTVETYVPKVVVEEKIVEVPKYIPEYVEKVVEVPEVQYVDKIVEVPEYQYEYKYVPKIETKENIIQRPKYETKYIEKVVEVAQVKEVVRYQDVEEVEEIIRYVPKDSVVPEEWKRIQEEQDKREAELKEKEAKEEEELKGLLEEERKLHEERVREQIKVQQQIIQQQLSARAEQERLLKERREAEMVHFPAVEGAPPLPTIPKVEQVFKPKVIKQVEIQKHVPISVDVPVPYMVPKPVVVSVQVPVLKFRDHFVPVPVRRRVVPRIRWTNEVYEVECIKEKPFLQVQ…	0	192.997	46	29	125	29	609	69.6	5.19	400.08	29	1.095	1.093	1.082	0.916	1.003	1.001	0.991	1.025	0.999	0.986	0.13	0.13	0.11	-0.13	0	0	-0.01	0.04	0	-0.02	0.612556	0.535831	0.528383	0.520238	0.949134	0.868533	0.438887	0.387065	0.747854	0.372315	0.889498	0.902448	0.922119
FALSE	High	Master Protein	TGGT1_231480-t26_1-p1	transcript=TGGT1_231480-t26_1 | gene=TGGT1_231480 | organism=Toxoplasma_gondii_GT1 | gene_product=TOG domain-containing protein [Source:UniProtKB/TrEMBL;Acc:S7WJ42] | transcript_product=putative GCN1 | location=TGGT1_chrVIII:1452018-1468462(-) | protein_length=3416 | sequence_SO=chromosome | SO=protein_coding_gene | is_pseudo=false	MSAGCGSEEAHNGAGPPADTPLAAEDSVSLSDALQSSSLAARGGSYLDELANSLDVVLSILQSRSAEGDSEVGLPVIRDPSIINLLTSAVLMNVATTPDITKAASSQLQQVLSVVRTALVTEAHVAAGSPVTDSGNALPVLTSFCQAAQQAFKRVRTAPAAVAEAAVARFLGVLCEVVHNLSEADAKVICEHPPCSAVFGNSLVLLSRTLAPAAKQASTVASGMKTETDILTVLERQLWQPVEGGLGVPLLRGSAVRLLERLCHLSPSIRELLLQHVTKGLSSPLSEGDFGPYISVYILGRYLRQILLSSGTFRCRGNKGGDSPGSHTALDDEKKKLLAAKKATALEMRNALLKVYIQAVVEARQPVGGVLCASFRPLLSLVQEGDWSLVLPPLKRGLK…	0	192.818	17	56	104	56	3416	362.4	7.03	233.73	56	0.951	0.971	0.953	1.054	1.003	1.023	1.004	1.016	1.022	1.002	-0.07	-0.04	-0.07	0.08	0	0.03	0.01	0.02	0.03	0	0.407585	0.561598	0.537513	0.477966	0.861165	0.326026	0.624723	0.551969	0.131668	0.913734	0.889498	0.902448	0.922119
FALSE	High	Master Protein	TGGT1_311400-t26_1-p1	transcript=TGGT1_311400-t26_1 | gene=TGGT1_311400 | organism=Toxoplasma_gondii_GT1 | gene_product=WD domain, G-beta repeat-containing protein [Source:UniProtKB/TrEMBL;Acc:S7UT11] | transcript_product=WD domain, G-beta repeat-containing protein | location=TGGT1_chrXI:2010353-2023624(-) | protein_length=1585 | sequence_SO=chromosome | SO=protein_coding_gene | is_pseudo=false	MALKEVCRSACIAWGPPTRGPAHTKCAASQEEKSTSSGSSLQSHQLYLALGTMGLDPHLELATVDFASSSTALPVVASVSASSPFQCIAWGSSGQNKLAGVAGEHGNGVGVGERALGLLAGGMADGDVTLWDAEAILRSGSPSGSELSSFGSANGTGEASGSAKGLLASVPVHRNQRVHCIHFNPSRPSLLAAGGSSGSVSILDVENVYDVAVYEPGGEGQGSNSGASGDECTSLAWNRVVPHVLATAFSSGTTSVWDLKQRKTAVSFCDPTHRQSRPSSVVWLPNQATQLLLAYDDDRHPVLQLWDLRNSSYPLRETASDGVYGHTRGIVNAALNPMDSRMLLTSGRDNRIVCWWLEEDAFHTQGGQSHPSSGFSVYMQQQTQEPYVQLQWAPSSTPG…	0	192.236	26	36	104	36	1585	165.5	6.6	298.48	36	0.933	0.944	0.947	1.073	1.002	1.014	1.017	1.011	1.007	1.008	-0.1	-0.08	-0.08	0.1	0	0.02	0.02	0.02	0.01	0.01	0.523766	0.582003	0.628048	0.520989	0.384372	0.0577121	0.217271	0.0197618	0.799343	0.755212	0.889498	0.902448	0.922119
FALSE	High	Master Protein	TGGT1_318230-t26_1-p1	transcript=TGGT1_318230-t26_1 | gene=TGGT1_318230 | organism=Toxoplasma_gondii_GT1 | gene_product=Phosphoglycerate kinase [Source:UniProtKB/TrEMBL;Acc:S7VZ21] | transcript_product=phosphoglycerate kinase PGKI | location=TGGT1_chrIV:1413955-1416908(+) | protein_length=417 | sequence_SO=chromosome | SO=protein_coding_gene | is_pseudo=false	MLANKLGIQDVGAQLTGKSVLIRVDFNVPMKDGVVQDATRIKATLPTLEYALSKNPRCLVLLSHAGRPDGRVQMKYTLKPVAAALQEFLPKKVTFVEDCVGPKAEEAVQAAKNGEILVMENVRFHIEEEGKGVDEQGNKIKASPEAIAKFKADLTKLGDIYINDAFGTAHRAHASMVGIEVPVRAAGLLMKKELDYFSKALECPEKPFLAILGGAKVRDKIQLIENMLDRVQMMIVAGGMAFTFKKVLDNMPIGDSLFDEEGAKIVPDIMAKAKAKGVEMLFSCDFLCADKFDNNANTQICEDKTGIPDGWMGVDIGPKTVEKATEMILRAKTLVWNGPPGVFEMSNFAKGSIAFCGAVAKATEKGCITIVGGGDTAALVEREGYASKVSHVSTGGGAS…	0	191.639	80	30	125	28	417	44.6	6.99	357.35	30	1.248	1.237	1.244	0.806	1.005	0.997	1.002	1.003	1.016	1.035	0.32	0.31	0.31	-0.31	0.01	0	0	0	0.02	0.05	0.543853	0.555347	0.543012	0.530772	0.804237	0.857137	0.894831	0.673913	0.0362076	0.161986	0.889498	0.902448	0.922119
FALSE	High	Master Protein	TGGT1_226250-t26_1-p1	transcript=TGGT1_226250-t26_1 | gene=TGGT1_226250 | organism=Toxoplasma_gondii_GT1 | gene_product=DEAD (Asp-Glu-Ala-Asp) box polypeptide DDX3X [Source:UniProtKB/TrEMBL;Acc:A0A125YSI6] | transcript_product=DEAD (Asp-Glu-Ala-Asp) box polypeptide DDX3X | location=TGGT1_chrX:1667417-1670378(+) | protein_length=734 | sequence_SO=chromosome | SO=protein_coding_gene | is_pseudo=false	MDSQQQLSPAVDSAVGSRVGQAAGLQQPKRYVPPHLRNRPPAQDNFSGAGGYPEYPSSSNALSSQAHGQTYSPTDRTFNSSSSNGLAAGSPGQNQQTGRRYVPPGSGDRFSCLGAGGARYTPPNTTYNTPAGGQGEIPGNAAGNAQGGVYNARAAAMQQGGYGSSRTMRASVTGTGWDVRDGRRYVPEKEKDVFSSDKLQSTGIKFDSYDKVPVELKGRGAERIMAIESFQTPGMQIHPLLLQNVSRVNYTKPTPIQKNSIPTILSGRDLMACAQTGSGKTAAFLYPIIARMLQDGPPPLPQAAAGGGSGYRKPPAYPICLVLSPTRELAMQIYEEARKFQFGTGVRTVAVYGGSDVKRQLIDLDGGCDICVATPGRLVDLLERRKVRLGLVQFFVLDE…	0	189.424	53	29	110	28	734	78.5	9.09	310.02	29	0.916	0.925	0.916	1.094	1.001	1.011	1.002	1.008	1.025	0.988	-0.13	-0.11	-0.13	0.13	0	0.02	0	0.01	0.04	-0.02	0.216251	0.386965	0.336789	0.375979	0.967641	0.29285	0.850179	0.247237	0.16148	0.226147	0.889498	0.902448	0.922119
FALSE	High	Master Protein	TGGT1_273870-t26_1-p1	transcript=TGGT1_273870-t26_1 | gene=TGGT1_273870 | organism=Toxoplasma_gondii_GT1 | gene_product=SWI2/SNF2 ISWI-like (AT hook) [Source:UniProtKB/TrEMBL;Acc:S7V4B2] | transcript_product=SWI2/SNF2 ISWI-like (AT hook) | location=TGGT1_chrVIII:3198884-3213308(+) | protein_length=1556 | sequence_SO=chromosome | SO=protein_coding_gene | is_pseudo=false	MNTATESSSPPEGEKEKGAASVDMSVAANKPGSVESELSSDRRINVDDLSPGNKPTGDGQETPEAEEEEEDEEEEKEDEEEEGLREGEDETHTFTQAERHSGEYGLANAELEAKLRELLRQADTFSSRIHGGGNAAAPPKKGPGSRGRERRMLSEAEEDDILLRRLEEDSGEGAEGDASRQGDLFVRITEQPSCIEGKMKHYQIEGLNWLYQLHCLDINGILADEMGLGKTLQTISILAFLQFEKNIPGPHLVICPRSTLDNWFNEVKKWCPRFRPARLHGTKEERQELYESVLDPGLFDICITTYEMVIKDYHRLASRFQWNYLIMDEAHRIKNEKSVLSEVVRRFRPRRRLLITGTPLQNNLRELWALLNFIMPQLFDVTLDFAALFDFSRLNTEQQ…	0	188.853	32	43	78	43	1556	175.1	5.27	215.93	43	0.926	0.931	0.953	1.059	0.981	0.986	1.009	0.979	1	0.998	-0.11	-0.1	-0.07	0.08	-0.03	-0.02	0.01	-0.03	0	0	0.501865	0.419955	0.566967	0.508449	0.481814	0.14341	0.0509245	0.342471	0.871274	0.928148	0.889498	0.902448	0.922119
FALSE	High	Master Protein	TGGT1_230940-t26_1-p1	transcript=TGGT1_230940-t26_1 | gene=TGGT1_230940 | organism=Toxoplasma_gondii_GT1 | gene_product=hypothetical protein | transcript_product=hypothetical protein | location=TGGT1_chrVIII:1112065-1119747(+) | protein_length=1523 | sequence_SO=chromosome | SO=protein_coding_gene | is_pseudo=false	MAPVMTASAASDRMPGLQRGKQRVRQNAFAGSASSSSSRHAKAQPTQALRGAEGQGLSPHQQRLQQNALLSGRHHLALGSDENSITDLSPRSQKWVEDVHPLLEFFNYSKRDVYALVQRAEYDQDRVQQAVAEIVEEKKGHEQGSWEVVLTKQQKHQLHRAAQAETLPLSGREGRTRRPDRERDNRHANADRQRGNEHPSAGRRADRQTAAGPVQRRRRDSRGEAGGFRRAGGQNATGKAATGRRRGRQGEAVPGVERDWEVEALESQWGAGPDGLVLPKTPVRSGEVEGTSSGSPVAQQTAAPPAQKETVNTPEAPQATAAPAAATASPARSWAARLVQKKETVPTPESKASLLGAVKSPRESSEARKREPSPIAAPAVKSPRAATPVRDRSPHPTSE…	0	188.294	30	37	88	37	1523	155.1	9.44	266.43	37	0.925	0.938	0.942	1.098	1.016	1.03	1.035	1.027	1.015	1.023	-0.11	-0.09	-0.09	0.14	0.02	0.04	0.05	0.04	0.02	0.03	0.362778	0.630779	0.621014	0.429304	0.643156	0.406568	0.225272	0.112221	0.0317186	0.159648	0.889498	0.902448	0.922119
FALSE	High	Master Protein	TGGT1_227948-t26_1-p1	transcript=TGGT1_227948-t26_1 | gene=TGGT1_227948 | organism=Toxoplasma_gondii_GT1 | gene_product=M16C_associated domain-containing protein [Source:UniProtKB/TrEMBL;Acc:S7W5W7] | transcript_product=peptidase M16 inactive domain-containing protein | location=TGGT1_chrX:626225-636243(+) | protein_length=1306 | sequence_SO=chromosome | SO=protein_coding_gene | is_pseudo=false	MRFSVVSAPMATPSTATGSPPVSSPCSSSVQRRGLSLGKRATIPSFLASGRRPAGLSSVLSSPIRAAAAISVAAAFASQVPSLTALLSSISCSSPAPNPLAFTCLPPPACPLPAQKGPLSTPAAPSTPREAPRSPLSASAWASPAFSASSQSPCYSAFAVPSTANAWEGRLFSVMPAAALSSGSRGASAAQAEGAGSLTTLAAPAHPAFVVTSQDTVPELHLAVTEYVHRKTGAHVVSLTVPSTEKEKVFCIAFRTPVVDSTGVPHILEHSVLSGSAKYPVKEPFAELLKGSLYSYLNASTYPDRTLYPVASANDEDFYNLANVYFDAVFQPRAVRDPDVLLQEGWRLEVTSEDEKEAADAVRLRGEDEAPRPRERRRKLAYQGVVLNEMKGVYSSPEA…	0	188.222	34	43	114	43	1306	142.6	6.81	295.96	43	0.984	0.986	1.022	1.016	0.999	1.002	1.039	1.012	1	0.996	-0.02	-0.02	0.03	0.02	0	0	0.05	0.02	0	-0.01	0.718554	0.807532	0.684306	0.514925	0.979939	0.957484	0.365199	0.45026	0.990414	0.674255	0.894043	0.925286	0.922119
FALSE	High	Master Protein	TGGT1_238050-t26_1-p1	transcript=TGGT1_238050-t26_1 | gene=TGGT1_238050 | organism=Toxoplasma_gondii_GT1 | gene_product=Nuclease and tudor domain-containing protein [Source:UniProtKB/TrEMBL;Acc:S7URW3] | transcript_product=nuclease and tudor domain-containing protein | location=TGGT1_chrVI:31087-39926(+) | protein_length=1024 | sequence_SO=chromosome | SO=protein_coding_gene | is_pseudo=false	MASGIATVKEVVSGDTFVLVGAPKGGPPPEKRLSLASVQAPRVAMKSLSHEVQDEPFGWTAREFMRSRLIGQQVEFKVEYAMNNKEFGTIKLRGENVACALLKQGLAKLKPNRNPPCAPDIEGKNQERREAERDARRREAERDARRERSRARREEGEKQSETRGGRKAGRRGEDGEERKEGKREKEERRGRECEKHREELPERRRELEQCQDLAEQRQLGVWATDPAAGSGTIREMKWAMNDVEFVKAFVAEHKGKKLPGIVEYVRDGGCMRVALLLPQKENESLKVVYLPVLLSGIQCDGFKREQQEGSAEYKVVPEPFAVEARFFVEIRLLNRDVEVRIEGCDEYGNVNGTVYHPKGNISILLLQNGLAKIQSGSLGLTECGAQLSQAMREAQQKQL…	0	188.016	37	36	107	36	1024	114.2	8.31	289.32	36	1.026	1.032	1.04	0.966	0.991	0.997	1.004	1	0.993	1.01	0.04	0.05	0.06	-0.05	-0.01	0	0.01	0	-0.01	0.01	0.603281	0.573949	0.609878	0.330569	0.656993	0.892666	0.927603	0.989335	0.802254	0.695616	0.889498	0.902448	0.922119
FALSE	High	Master Protein	TGGT1_236970-t26_1-p1	transcript=TGGT1_236970-t26_1 | gene=TGGT1_236970 | organism=Toxoplasma_gondii_GT1 | gene_product=SWI2/SNF2-containing PHD finger protein [Source:UniProtKB/TrEMBL;Acc:S7VZH4] | transcript_product=SWI2/SNF2-containing PHD finger protein | location=TGGT1_chrX:5508193-5518721(+) | protein_length=2556 | sequence_SO=chromosome | SO=protein_coding_gene | is_pseudo=false	MGSQGVRSGSASRSGSGENSRSSSCARDASSSPPRSTFNSPRLRAQAERQAAAQAEAVASSSSMPRNGCQSSVAAGVSSGRSTKFSGSFFSQASSSGAGRSKRGGMWCYICRDSMQRGEENTVECTACPKRFHMECLQQEGVIQPGERVAADDWMCPQCLEEHEEDEIQNDERCFICKRKEPEDEEEDRLLMCDGCPNSYHMRSCLKLTIEPDEEKWFCPECNPSGFKQDEIRRLGRGRAGAGTTEGRGEIVNSSTCYVCQRPGKLLGCDFCVNSFHPTCLVDVDWDAIGEEWECPVCKGHDPLANQMHKRWSRAEIDAKRKERIKCLERIRVKTTRYRNRFLLVNQKDLGPFVNQKVLNNLAKSFRAQMNANASGKRRGPQAQCGRLQVERSIQDLLE…	0	186.622	22	48	84	48	2556	277.7	7.68	211.9	48	0.986	0.993	1.002	1.033	1.018	1.025	1.035	1.032	1.024	1.029	-0.02	-0.01	0	0.05	0.03	0.04	0.05	0.05	0.03	0.04	0.655318	0.733125	0.971373	0.412826	0.0297732	0.199576	0.365802	0.267958	0.562407	0.292593	0.889498	0.906062	0.990747
FALSE	High	Master Protein	TGGT1_288360-t26_1-p1	transcript=TGGT1_288360-t26_1 | gene=TGGT1_288360 | organism=Toxoplasma_gondii_GT1 | gene_product=Tryptophanyl-tRNA synthetase (TrpRS2) [Source:UniProtKB/TrEMBL;Acc:A0A125YPX8] | transcript_product=tryptophanyl-tRNA synthetase (TrpRS2) | location=TGGT1_chrIX:2284649-2289081(+) | protein_length=689 | sequence_SO=chromosome | SO=protein_coding_gene | is_pseudo=false	MFFLSTSVIPGAAVFSVRFARNPTPCLLPRNSLPVHLRHTALTPRFLEHSNLAFGFFRRSISTGCSRTLRIKSTPVGVLFSAKMASRTPFQDAALSIVKGAACIALSLKTARTTQNVKFSKDNRCSITLGPIEVEPTAAEEALLKTLTKQKIEENCPFRVFTIPRDLATRMYQESYLDEFGIPANVKEVRLVVLPEWNINANMYPVLKSTGQIADIQFESVKFNEEKKQLCLSLHVVPGPDEQSPALAEEEKLGPEEIPSRAQVLPPSGVEGDDFGEGDDDQTITPWDVQAAEGGIDYNKLLKKFGCSSITPELISRIEALTGKRAHHLLRRGIFFSHRDLNLLLDSLEKRQARLASGKREDGPGSEGLSGPGFYLYTGRGPSSEALHIGHLVPFMFTK…	0	185.896	47	26	152	26	689	77	7.3	445.49	26	1.01	1.013	1.007	0.974	0.984	0.987	0.98	1.01	1	0.973	0.01	0.02	0.01	-0.04	-0.02	-0.02	-0.03	0.01	0	-0.04	0.871708	0.816887	0.921919	0.499125	0.600827	0.586428	0.611213	0.772051	0.991567	0.680408	0.94421	0.928483	0.970857
FALSE	High	Master Protein	TGGT1_292080-t26_1-p1	transcript=TGGT1_292080-t26_1 | gene=TGGT1_292080 | organism=Toxoplasma_gondii_GT1 | gene_product=Leucyl-tRNA synthetase [Source:UniProtKB/TrEMBL;Acc:S7UPR1] | transcript_product=leucyl-tRNA synthetase | location=TGGT1_chrIX:4343158-4354677(+) | protein_length=1261 | sequence_SO=chromosome | SO=protein_coding_gene | is_pseudo=false	MAACKSAGEAVRDRFHLPSIPSPSGERLRRALLALSQPLSQFVSSAASPSLPSPTPKRFSSLASLRAPLPLPAVLSRSPPSASSSAAPLPVLFRGLSSKMAAAPAAPQSRGRRDKLLSIEEAIQARWARENPYEVDAPLDAANAEKKKYFCSFPYPYMNGKLHLGHGFTLCRAEFQARFQRMQGKNILWPLGLHCTGMPILACADKLKREIALRKAEQDCGENGEKREHVESAENNSAEQQNGEEDAKKKKSKVAAKTGNAKTQWEIMLGMGIPEAEIAAFADAQHWLRYFPPLAKRDVTRMGFGIDWRRSFVTTDVNPFYDAFIRWQFNTLMKRGKLKFGMRATILSRREKQACADHDRASGEGVGPQEYTVVKLFLQGEKMREAPVPQHQPLVQLLE…	0	184.907	35	36	106	36	1261	141.2	6.96	296.23	36	1.053	1.059	1.062	0.941	0.991	0.997	0.999	0.995	0.991	0.996	0.07	0.08	0.09	-0.09	-0.01	0	0	-0.01	-0.01	-0.01	0.478359	0.346864	0.320751	0.34256	0.564435	0.266156	0.868988	0.619605	0.0953479	0.0612557	0.889498	0.902448	0.922119
FALSE	High	Master Protein	TGGT1_297745-t26_1-p1	transcript=TGGT1_297745-t26_1 | gene=TGGT1_297745 | organism=Toxoplasma_gondii_GT1 | gene_product=hypothetical protein | transcript_product=hypothetical protein | location=TGGT1_chrII:1939393-1956115(-) | protein_length=3869 | sequence_SO=chromosome | SO=protein_coding_gene | is_pseudo=false	MRAFAASRRRTVQLDSVGRHEAPLAMPGFDAVSSSAFSSAVTCALSPGFPSTSLHPSSLRPQSLFCGPSSGASAVRSALLSKFSLSRLLLFLLLALLLLAVHPEKPAPGRLPGVAAAAAPSEQPQLKIGPAQVLLPSPAQAAGRLASASVSVRTLLIVENGSSLAAAPCFFWSVQHPDLIRVLHPDCAPSQPASACLLPSTSLSASGAGVCLPRVLVEASHHTPHKRGRSWIFASPGRPASSPGRQVSPSALRVQAVVAPIARIAFRTRDRRLAVGQLGDVGVLAFDEEGNIFTSLQGLVFIWKFEGERGVLQAEDITSDAEAASATRQWVERSSQSASGVHTPDSAAGPFWRSDMLLVRGLKTGKATISVRLAGDEHRHVGEARVSFVVHEPVLLLPA…	0	184.064	15	49	87	49	3869	413.4	6.65	189.42	49	0.902	0.91	0.914	1.123	1.013	1.022	1.026	1.021	1.01	1.005	-0.15	-0.14	-0.13	0.17	0.02	0.03	0.04	0.03	0.01	0.01	0.610056	0.625196	0.683184	0.541374	0.558012	0.234908	0.585294	0.062236	0.674846	0.773473	0.889498	0.902448	0.922119
FALSE	High	Master Protein	TGGT1_215260-t26_1-p1	transcript=TGGT1_215260-t26_1 | gene=TGGT1_215260 | organism=Toxoplasma_gondii_GT1 | gene_product=Carbamoylphosphate synthetase [Source:UniProtKB/TrEMBL;Acc:S7UPU1] | transcript_product=carbamoylphosphate synthetase | location=TGGT1_chrX:6736108-6760149(-) | protein_length=1699 | sequence_SO=chromosome | SO=protein_coding_gene | is_pseudo=false	MGVHHALDDAGEMPHSGGRRAVAPIYPLDLAGRLRPAMLVLADGTEFLGYSFGYPGSVGGEVVFNTGMVGYPESLTDPSYEGQILVLTYPLIGNYGVPSSEKDEHGLPKYFEGDRIYVRALVVADYDNAAVTAHFRAENSLSAWMNTHKVPAIAGVDTRALTKHLREVGCMLGKIVVLSEEEERRSGLSLSALAALPSATAAEQRGENDATVTPDKAEARLRVERRQAALTMWEEAIRNKAKNLPWEDPNKDNLVALVSRKEVRVYKSTVVDPNLRDVLILCVDCGMKYNIYRQLLHSKFEHCNIILKVVPWDFDFGNDEFDGLFISNGPGDPERCEKTVANIRRVMERKIPIFGICLGNQLLALAAGARTYKMKYGNRGMNQPVIDLRTSRCYITPQN…	0	183.631	28	45	91	45	1699	187	6.47	241.19	45	1.001	1.02	1	0.986	0.987	1.006	0.986	0.981	0.998	1.017	0	0.03	0	-0.02	-0.02	0.01	-0.02	-0.03	0	0.02	0.898245	0.253016	0.977957	0.684153	0.60785	0.891523	0.639068	0.703357	0.968925	0.709527	0.95609	0.902448	0.99322
FALSE	High	Master Protein	TGGT1_294800B-t26_1-p1	transcript=TGGT1_294800B-t26_1 | gene=TGGT1_294800B | organism=Toxoplasma_gondii_GT1 | gene_product=Putative elongation factor 1-alpha (EF-1-ALPHA) [Source:UniProtKB/TrEMBL;Acc:S7UIU6] | transcript_product=putative elongation factor 1-alpha (EF-1-ALPHA) | location=TGGT1_chrIa:1133102-1134034(-) | protein_length=310 | sequence_SO=chromosome | SO=protein_coding_gene | is_pseudo=false	LAFTLGVKQMIVGINKMDSCNYSEDRFNEIQKEVAMYLKKVGYNPEKVPFVAISGFVGDNMVEKSTNMSWYKGKTLVEALDTMEAPKRPSDKPLRLPLQDVYKIGGIGTVPVGRVETGILKAGMVLTFAPVGLTTECKSVEMHHEVMEQAVPGDNVGFNVKNVSVKELKRGYVASDSKNDPAKGCATFLAQVIVLNHPGEIKNGYSPVIDCHTAHIACKFAEIKTKMDKRSGKTLEEAPKCIKSGDAAMVNMEPSKPMVVEAFTDYPPLGRFAVRDMKQTVAVGVIKSVEKKEPGAGSKVTKSAVKAAKK	0	183.308	74	21	230	3	310	33.7	9.04	589.72	21	1.342	1.361	1.361	0.737	0.99	1.004	1.004	1.01	0.99	1.019	0.42	0.44	0.45	-0.44	-0.02	0.01	0.01	0.01	-0.01	0.03	0.538232	0.534422	0.528568	0.518727	0.443365	0.884644	0.832386	0.400443	0.52272	0.682593	0.889498	0.902448	0.922119
FALSE	High	Master Protein	TGGT1_216730-t26_1-p1	transcript=TGGT1_216730-t26_1 | gene=TGGT1_216730 | organism=Toxoplasma_gondii_GT1 | gene_product=MCM domain-containing protein [Source:UniProtKB/TrEMBL;Acc:S7VUI4] | transcript_product=MCM2/3/5 family protein | location=TGGT1_chrXI:5853958-5863220(-) | protein_length=1028 | sequence_SO=chromosome | SO=protein_coding_gene | is_pseudo=false	MASYVTDDFDRPEPGAPGADTTEGGEEDMTMTMSGHPGMMGETLEFQTNSMRRGGATNKQGGLRTRVISTMSEGGLESAEGALVNYEEEVKLQRQLGEESNIERGRRMKDLSNAFKRDLESVPAVRQQLDLLQNRAAAIVSGLESSAQSKEQSGDDDGALAGSAETCNQRLQLSISLLVQMADAVSFYDHPLIRNPCFALPALETAVQEVWRERGALGPAPRVGILGWLGHDHVTPRGLNSGKVNRLVCVEGVVNRCTAVQPKLSRAVYVNEMQGGQALPGPEDSEESQERQVYVRAFYDVANLDKDIRDTQPPPERDPTGLRVNRQELGYSYFKNVQRFFVQEAPETAPTGQLPRYVEVLVEEDLCDRVKCGDRVRVWGVYRPRMGATNGTSSGLVRP…	0	182.45	44	38	85	38	1028	113.2	5.21	215.1	38	1.016	1.026	1.021	1.008	1.024	1.034	1.029	1.001	0.973	0.974	0.02	0.04	0.03	0.01	0.03	0.05	0.04	0	-0.04	-0.04	0.768851	0.474562	0.574543	0.61718	0.580884	0.228145	0.312577	0.971481	0.356665	0.421741	0.900959	0.902448	0.922119
FALSE	High	Master Protein	TGGT1_321500-t26_1-p1	transcript=TGGT1_321500-t26_1 | gene=TGGT1_321500 | organism=Toxoplasma_gondii_GT1 | gene_product=RNA recognition motif-containing protein [Source:UniProtKB/TrEMBL;Acc:A0A125YP61] | transcript_product=RNA recognition motif-containing protein | location=TGGT1_chrIb:1771014-1773404(+) | protein_length=475 | sequence_SO=chromosome | SO=protein_coding_gene | is_pseudo=false	MEGAIPQAGEMENGATVGAPVSGVPRPAGHMAPRVEIKLFVGRVPQSMEDAALRPIFEEFGEVKEAVIIRDKATGKHKNSAFIKMDSIAAADAAIRGLNSTRILEQSMGPITVKYATGEAEKLGFATSSCEPGQDQAKLFIGSIPRTMTEEEVRQFFSTYGTVEEVFVMKDNVQNTGKGCCFVKFAFKEEALHAVRTLSGKHTFEGCTRPVEVRFAESKAARQQQMMNQQAMGGPQGMRGPGRMGNMGGMGASNMGGMGGPAMGMGSSTQMGTPNNSNPRAAGQWKEYFTQDGRAYYHNEYTNVTTWDRPQEFYQLPPAPPHMGGAGGMAAGSGQSSNAEGPPGANIFVFHVPNEWTYYDLMQNFGGFGNVVSARVATDRTTGRNRGFAFVSYDNVESA…	0	180.786	48	18	104	18	475	50.9	8.35	340.74	18	0.91	0.912	0.908	1.074	0.978	0.979	0.975	0.982	0.986	0.964	-0.14	-0.13	-0.14	0.1	-0.03	-0.03	-0.04	-0.03	-0.02	-0.05	0.333525	0.271911	0.216317	0.446863	0.168525	0.45396	0.517094	0.150147	0.374096	0.548424	0.889498	0.902448	0.922119
FALSE	High	Master Protein	TGGT1_269885A-t26_1-p1	transcript=TGGT1_269885A-t26_1 | gene=TGGT1_269885A | organism=Toxoplasma_gondii_GT1 | gene_product=Rhoptry metalloprotease toxolysin TLN1 [Source:UniProtKB/TrEMBL;Acc:S7V3X7] | transcript_product=rhoptry metalloprotease toxolysin TLN1 | location=TGGT1_chrVIII:5561686-5568242(+) | protein_length=1291 | sequence_SO=chromosome | SO=protein_coding_gene | is_pseudo=false	MKQGTTRPRVGLTGAVLLLVVWTVAILIDCSSGSRVLFDRRPILARLRRATSFVDSTSGQNASPRPTKTDKIRKPRNDSRNYRYIELPNELRALLVSDPECDEAAASMRVGVGSMSDPPKIPGLAHFTEHMLFQGSKRFPGTHDFFDFVHNHGGYTNAFTSKFSTVFSFSIGPGFLEPGLDRLADLFSAPLLKSENLLKEVNAVHSEYIIDLTDDGRRKHHLIRQTAKGGPFSNFTVGNLESLMERTKQQGIDPVKAMREFHNKWYSSNLMTLAVVGRESLDVLESHVRKHFGNVPNGRVTPPVFEECSEAFIPLDPNELGTETLVVPEADLHDATFVFYLPPQAKNWRSKPLQFISEMLEHEGPTSLSSKLKREGLITSLVTDYWSPELCTVLQVNVR…	0	179.155	33	32	90	26	1291	142.2	6.92	266.39	32	0.924	0.923	0.94	1.07	0.989	0.987	1.005	1.016	1.005	0.999	-0.11	-0.12	-0.09	0.1	-0.02	-0.02	0.01	0.02	0.01	0	0.343015	0.446082	0.612657	0.531512	0.750297	0.30443	0.771367	0.154205	0.338128	0.967908	0.889498	0.902448	0.922119
FALSE	High	Master Protein	TGGT1_300260-t26_1-p1	transcript=TGGT1_300260-t26_1 | gene=TGGT1_300260 | organism=Toxoplasma_gondii_GT1 | gene_product=AA_TRNA_LIGASE_II domain-containing protein [Source:UniProtKB/TrEMBL;Acc:A0A125YPX4] | transcript_product=threonyl-tRNA synthetase family protein | location=TGGT1_chrXII:83727-88302(+) | protein_length=844 | sequence_SO=chromosome | SO=protein_coding_gene | is_pseudo=false	MSFSLLVSCLRSPPFRPRFLWGSPRACRRVPEARSPSRLLFSAQRRLPFSPRGPRFSTMASGRRAEKGTVAALATEEKIGDPHFQVSENSPFLQKRLQVFEDLYEKQTRRLKEKPRREISIELPDGSKKSGTAFETSPYDVALQISKGLAEASLVAKVLYEQPSAESEAITAADDEEEEEAECPCGEHAEESPAEKWILYDMKRPLEGSCRLQLLKFDSDEAKHVFWHSSAHILGQAIEATFGAQLTVGPALTNGFYYDAYMGDAKVTEESYGRLEAAAAAVIKEDQAFRRLVCSKAEALELFADNPFKVQLIASKIPEHGLTTVYCCGSLVDLCRGPHIPSTGKVKAFQVTKHSASYWLGRQHLDSLQRVYGVSFPDKKLLKDYLKLLEEAKKRDHRV…	0	179.115	41	32	102	32	844	95.8	7.49	277.36	32	1.011	1.02	1.008	0.972	0.983	0.991	0.98	0.99	0.996	0.987	0.02	0.03	0.01	-0.04	-0.03	-0.01	-0.03	-0.01	-0.01	-0.02	0.5045	0.406903	0.717792	0.108354	0.461092	0.730739	0.503567	0.517661	0.629734	0.769034	0.889498	0.902448	0.922119
FALSE	High	Master Protein	TGGT1_290670-t26_1-p1	transcript=TGGT1_290670-t26_1 | gene=TGGT1_290670 | organism=Toxoplasma_gondii_GT1 | gene_product=CYTOSOL_AP domain-containing protein [Source:UniProtKB/TrEMBL;Acc:S7UP88] | transcript_product=leucyl aminopeptidase LAP | location=TGGT1_chrIX:3637150-3642271(+) | protein_length=781 | sequence_SO=chromosome | SO=protein_coding_gene | is_pseudo=false	MVPPTPGASCLLSRTRQRNVLPLACSLCLYTVTVCSALRRDPTFLLNQLKIGPQFAHFSPFVETGRTSSHSGVSPSTFSGSLRSRQHAFTMRPSSFPAFLVKLPAKHKNQCRQSAAALAGSTACWQSSLHAPACAFPFSRRNGGHPERRDAPSLSSPRSSPASFLSVLRPVTSPLPCVWKAGTPHARPLALPLPPVRTASLATFSSGSSPRLSSNHSEMSRVPAPLTVVKTDPTAIPFVGCQPAKKVRMEAVDISEAEKYSGDLIVFSVLAPGCFHDAPNASQPQKGPIALPELAQKFDDAVGQGMLKDAVEAADFKAKMGSQVFVRLPSKSAPAVKHLAALGFGSIAEVTPSAVTKAAAAFASMLLRGSGEKAKTVAVVLPTCQKVCPSAEGQRKTRE…	0	176.935	41	28	125	28	781	83.1	8.88	316.16	28	1.024	1.04	1.052	0.95	0.973	0.989	1	1.006	1.001	1.009	0.03	0.06	0.07	-0.07	-0.04	-0.02	0	0.01	0	0.01	0.79155	0.730828	0.571986	0.593598	0.00571453	0.656446	0.952375	0.6804	0.973269	0.567803	0.907794	0.906062	0.922119
FALSE	High	Master Protein	TGGT1_266960-t26_1-p1	transcript=TGGT1_266960-t26_1 | gene=TGGT1_266960 | organism=Toxoplasma_gondii_GT1 | gene_product=Tubulin beta chain [Source:UniProtKB/TrEMBL;Acc:A0A125YWG4] | transcript_product=beta-tubulin | location=TGGT1_chrIX:705551-707606(-) | protein_length=449 | sequence_SO=chromosome | SO=protein_coding_gene | is_pseudo=false	MREIVHVQGGQCGNQIGAKFWEVISDEHGIDPTGTYCGDSDLQLERINVFYNEATGGRFVPRAILMDLEPGTMDSVRAGPFGQLFRPDNFVFGQTGAGNNWAKGHYTEGAELIDSVLDVVRKEAEGCDCLQGFQITHSLGGGTGSGMGTLLISKVREEYPDRIMETFSVFPSPKVSDTVVEPYNATLSVHQLVENADEVQVIDNEALYDICFRTLKLTTPTYGDLNHLVSAAMSGVTCCLRFPGQLNSDLRKLAVNLIPFPRLHFFLIGFAPLTSRGSQQYRALSVPELTQQMFDAKNMMCASDPRHGRYLTASAMFRGRMSTKEVDEQMLNVQNKNSSYFVEWIPNNMKSSVCDIPPKGLKMSVTFVGNSTAIQEMFKRVSDQFTAMFRRKAFLHWYT…	0	176.389	61	21	183	7	449	50	4.81	488.8	21	0.986	0.986	0.98	1.019	1.005	1.004	0.998	1.019	0.998	0.989	-0.02	-0.02	-0.03	0.03	0.01	0.01	0	0.03	0	-0.02	0.340253	0.248817	0.0989816	0.396032	0.86518	0.669179	0.868873	0.0066557	0.760047	0.838271	0.889498	0.902448	0.922119
FALSE	High	Master Protein	TGGT1_256760-t26_1-p1	transcript=TGGT1_256760-t26_1 | gene=TGGT1_256760 | organism=Toxoplasma_gondii_GT1 | gene_product=Pyruvate kinase [Source:UniProtKB/TrEMBL;Acc:A0A125YPV3] | transcript_product=pyruvate kinase PyK1 | location=TGGT1_chrVIIb:4413512-4417055(-) | protein_length=531 | sequence_SO=chromosome | SO=protein_coding_gene | is_pseudo=false	MASKQPQTLSAGAVESGRVARLVSASSVMTQQLGKSTNIRMSQILEPRSEEDWTAHRTRIVCTMGPACWNVDTLVKMIDAGMNVCRLNFSHGDHETHARTVQNIQEAMKQRPEARLAILLDTKGPEIRTGFLKDHKPITLQQGATLKIVTDYNLIGDETTIACSYGALPQSVKPGNTILIADGSLSVKVVEVGSDYVITQAQNTATIGERKNMNLPNVKVQLPVIGEKDKHDILNFGIPMGCNFIAASFVQSADDVRYIRGLLGPRGRHIRIIPKIENVEGLVNFDEILAEADGIMIARGDLGMEIPPEKVFLAQKMMIAKCNVVGKPVITATQMLESMIKNPRPTRAEAADVANAVLDGTDCVMLSGETANGEFPVITVETMARICYEAETCVDYPAL…	0	174.582	48	20	112	20	531	57.5	6.4	335.01	20	0.964	0.961	0.969	1.031	0.994	0.99	0.999	1.004	1.021	1.017	-0.05	-0.06	-0.05	0.04	-0.01	-0.01	0	0.01	0.03	0.02	0.185754	0.269322	0.0755678	0.339848	0.536699	0.00389923	0.940001	0.753937	0.385791	0.354836	0.889498	0.902448	0.922119
FALSE	High	Master Protein	TGGT1_226910-t26_1-p1	transcript=TGGT1_226910-t26_1 | gene=TGGT1_226910 | organism=Toxoplasma_gondii_GT1 | gene_product=Amylo-alpha-1,6-glucosidase [Source:UniProtKB/TrEMBL;Acc:S7UWU6] | transcript_product=Amylo-alpha-1,6-glucosidase | location=TGGT1_chrX:1136138-1153007(-) | protein_length=1882 | sequence_SO=chromosome | SO=protein_coding_gene | is_pseudo=false	MSVKALNPRRLPPPGQAATEFFGETVEKFISYFDSAGELEAPNKNAGNFRVSKGVTVDLVVLNGSQRRPVVACVVETPLGEEDKLPKRTADFGHLVFTFKAALAGPYRIQLEYGPVVASQSGAAANNEDRVIGEKDAEASASRSPASVIIVEPSLSINGVALKQESISLQTVLSRCLGPFSGWKRMFTQTAELGYNVIHFTPLQALGESGSCYSIADQLHISDFFLEDKSLTGERGLEGDSSGAGQAAPGAVMALRRAASSDIVGLEELQAIIRMMETDLGLLSTIDLVLNHTASNSPWLQDHPDSGYSPANSPWLRGAYELDWKLQEFSRRIVRGEFAEKYGATKEINDEGQLQNVMRAFDEELLKPFRMSEWFLLHVDDTVKTWKDACAENAEKDPL…	0	174.192	29	45	96	45	1882	207.9	6.58	256.04	45	0.954	0.962	0.971	1.062	1.013	1.022	1.031	1.024	1.004	1.027	-0.07	-0.06	-0.04	0.09	0.02	0.03	0.04	0.03	0.01	0.04	0.513398	0.571586	0.70485	0.483058	0.344747	0.238166	0.0435554	0.15209	0.51656	0.455506	0.889498	0.902448	0.922119
FALSE	High	Master Protein	TGGT1_256990-t26_1-p1	transcript=TGGT1_256990-t26_1 | gene=TGGT1_256990 | organism=Toxoplasma_gondii_GT1 | gene_product=AA_TRNA_LIGASE_II domain-containing protein [Source:UniProtKB/TrEMBL;Acc:S7UYX0] | transcript_product=glycyl-tRNA synthetase | location=TGGT1_chrVIIb:4226828-4230134(+) | protein_length=771 | sequence_SO=chromosome | SO=protein_coding_gene | is_pseudo=false	MQVAPFRRVVRLSLFGLQRRFLSSRKNAIVATRLRALAVSEHFVRQFSTFCGEKKMTTLNGVTPADEAATEQLAEQLRELRVRVTQNAEKVRLLKQANAPAEEIAAGVDTLVHLRAQVTELEKQLESTRPLYYQLRSQCENLLKRRFFVVPSYEIYGGVGGLYDFGPPGCALKSAVEQLWRQHFVLAEDMLEVSGPCLTPHIVLKTSGHVDRFTDLMVKDTVTQDCLRADKYLEEKIDERLNAKEGISPEEASRLALLRRQADALSAAEMKVALEELQVKSPAGNPLSDPFPFNLMFGLKIGPKDEAGAGEEPATGRGQKASAASRSAEGRGYLRPETAQGIFVNFRRLLEFNGGRMPFAAAQLGLGFRNEIAPRNGLLRVREFQMGEIEHFVHPDQKD…	0	173.911	40	31	90	31	771	86.3	7.33	245.29	31	0.99	0.988	0.987	1.019	1.009	1.007	1.006	1.005	1.008	0.996	-0.01	-0.02	-0.02	0.03	0.01	0.01	0.01	0.01	0.01	-0.01	0.635114	0.73082	0.722844	0.15632	0.525043	0.813835	0.843008	0.817186	0.42218	0.903325	0.889498	0.906062	0.922119
FALSE	High	Master Protein	TGGT1_237220-t26_1-p1	transcript=TGGT1_237220-t26_1 | gene=TGGT1_237220 | organism=Toxoplasma_gondii_GT1 | gene_product=DNA replication licensing factor MCM7 [Source:UniProtKB/TrEMBL;Acc:S7UQY5] | transcript_product=putative DNA replication licensing factor Mcm7 | location=TGGT1_chrX:5679145-5687290(+) | protein_length=865 | sequence_SO=chromosome | SO=protein_coding_gene | is_pseudo=false	MATQGDAGTLCFTTLQQQQQHWAFLRADEAALQQKATHEVEQYDRHVSLLKNFFLHFVDEFASQGKGENVNATHGDFKYRNLLQAVHDERRDDLPVYLDDVREFFTTQQPEDAPLGEEDLGSAKKAASLTVYEAILTNTSRYIELLYQAADAVLKQEPDLFETGEEVEVEQDQVHFLKATDSQALNNELKLRLRKKDPWRKIRERDMAARRVPAFLRCGFRVCLYPPAREGCRLFRSVDATSMGKFSFFTCEVLRVQQVKPKLLVAAYECEECHEKVFQPVEANAFMPLLTCPLCKNSRNRECTLHLHPKLSFFLPFQEVKVQEPTCQIPEADVPRTLNCHLVGHAVTNILQPGMTVTLGGVLKPVRKMGFAALRSGLVQEKVFEVSFIQLKKQQTHLD…	0	173.809	40	30	90	30	865	96.8	6.93	277.06	30	1.14	1.161	1.136	0.905	1.032	1.05	1.028	0.992	1.008	0.997	0.19	0.22	0.18	-0.14	0.05	0.07	0.04	-0.01	0.01	0	0.465789	0.398188	0.425426	0.510795	0.276817	0.0563943	0.067078	0.543194	0.756956	0.565548	0.889498	0.902448	0.922119
FALSE	High	Master Protein	TGGT1_221620-t26_1-p1	transcript=TGGT1_221620-t26_1 | gene=TGGT1_221620 | organism=Toxoplasma_gondii_GT1 | gene_product=Tubulin beta chain [Source:UniProtKB/TrEMBL;Acc:A0A125YYZ4] | transcript_product=putative beta-tubulin | location=TGGT1_chrII:472166-474503(-) | protein_length=449 | sequence_SO=chromosome | SO=protein_coding_gene | is_pseudo=false	MREIVHIQAGQCGNQIGAKFWEVISDEHGVDPTGTYTGDSDLQLERINVFYNEATGGRFVPRAILMDLEPGTMDSVRAGPFGQLFRPDNFVFGQTGAGNNWAKGHYTEGAELIDSVLDVVRKEAEGCDCLQGFQITHSLGGGTGSGMGTLLISKVREEYPDRIMETFSVFPSPKVSDTVVEPYNATLSVHQLVENADEVQVIDNEALYDICFRTLKLTTPTYGDLNHLVSAAMSGVTCSLRFPGQLNSDLRKLAVNLIPFPRLHFFLIGFAPLTSRGSQQYRALTVPELTQQMFDAKNMMCASDPRHGRYLTACALFRGRMSTKEVDEQMLNVQNKNSSYFVEWIPNNMKSAVCDIPPKGLKMSVTFVGNSTAIQEMFKRVSEQFTAMFRRKAFLHWYT…	0	173.481	61	21	167	5	449	50	4.81	443.31	21	0.985	0.982	0.947	0.995	0.98	0.977	0.943	1.037	0.979	0.937	-0.02	-0.03	-0.08	-0.01	-0.03	-0.03	-0.08	0.05	-0.03	-0.09	0.490778	0.718917	0.0193355	0.785682	0.0305303	0.521256	0.130222	0.0308594	0.183011	0.268997	0.889498	0.905455	0.922119
FALSE	High	Master Protein	TGGT1_263180-t26_1-p1	transcript=TGGT1_263180-t26_1 | gene=TGGT1_263180 | organism=Toxoplasma_gondii_GT1 | gene_product=Myosin motor domain-containing protein [Source:UniProtKB/TrEMBL;Acc:A0A125YIS7] | transcript_product=myosin D | location=TGGT1_chrVIIb:714013-721737(-) | protein_length=822 | sequence_SO=chromosome | SO=protein_coding_gene | is_pseudo=false	MAAKPEQDCKTAAALIRAGSLIEGVESAGKDFLVWTTQGPAVKKDPDLLFSLCRVLPGSTQQTLKLQQVEPTADSQELTVQAKEVWQANPGIDPLTYGDIGGLPHTNEPCVLDFLARRYQSKVIYTTAEPLIVAVNPFQDLKNAGPDTIALYRDAPDVDKLPPHVFYASRRAMTNMHQLKKPQTIIVSGESGAGKTETTKMLMKYLATSAGGNLDLKIQTAIMAANPVLEAFGNAKTVRNNNSSRFGRFMLLDVAREGGIQHGKVVAFLLEKSRIVCQDKDERSYHIFYQFLKGAPGHMRQRYMLQPLEAYTFINPHCLDAPGIVDTEDFEQTVKSLESMNMTETETCTIWSIVSGVLLMGNAKPTGKTEAGVENAACFVGESEAALRNACSLLFLDYP…	0	173.259	48	40	103	40	822	91	8.34	292.29	40	1.093	1.084	1.105	0.904	0.988	0.98	0.999	1.004	0.994	1.004	0.13	0.12	0.14	-0.15	-0.02	-0.03	0	0.01	-0.01	0.01	0.532617	0.513322	0.446123	0.46015	0.41557	0.150318	0.82969	0.865972	0.817954	0.863275	0.889498	0.902448	0.922119
FALSE	High	Master Protein	TGGT1_265250-t26_1-p1	transcript=TGGT1_265250-t26_1 | gene=TGGT1_265250 | organism=Toxoplasma_gondii_GT1 | gene_product=RRM domain-containing protein [Source:UniProtKB/TrEMBL;Acc:S7UGW5] | transcript_product=RNA recognition motif-containing protein | location=TGGT1_chrIX:1478253-1487922(+) | protein_length=1564 | sequence_SO=chromosome | SO=protein_coding_gene | is_pseudo=false	MTQGSTEPALPVAEGGKCEETVLSSPADAAPKSTPSDSPSCSVVPPGAAAPPSDTPDRQAPSEKQEARTSTLSAKHEEGAARAQPEATPGPGKSQEEETGDGSASPASAGKKEEKSGETTTSTVRVHRWADESDDLDSPSFDPMSSAEVEPPEFDLGMSGYQPPSVRSTGNGIVSHADAGGYRRGVPGQSSFSGGYGGLVDSRFGGLVNPPHGHPHGPPASVGLGDGGFMQGGVTGPFTEVYVAELDAHVTEEDVSSIFAPGLTVRNVRIVREQANRGNKGGPNATCGAYVTFHSPEDAQRALAFHGKLYRPPRGAGLSSSQGLRGSSRQAGSGGSGVSARVLRISAISSPPLLSGEGGSPYLLSRATRSGSLGHLHSAGSPHLLPRGGRGFGGVYGQA…	0	173.175	34	41	71	41	1564	160.1	8.51	182.76	41	1.04	1.027	1.013	0.967	1.005	0.993	0.98	0.986	0.982	0.996	0.06	0.04	0.02	-0.05	0.01	-0.01	-0.03	-0.02	-0.03	-0.01	0.642216	0.765579	0.829292	0.648446	0.598171	0.701192	0.204082	0.441984	0.200676	0.863479	0.889498	0.912153	0.941162
FALSE	High	Master Protein	TGGT1_226660-t26_1-p1	transcript=TGGT1_226660-t26_1 | gene=TGGT1_226660 | organism=Toxoplasma_gondii_GT1 | gene_product=hypothetical protein | transcript_product=hypothetical protein | location=TGGT1_chrX:1361506-1380909(+) | protein_length=3736 | sequence_SO=chromosome | SO=protein_coding_gene | is_pseudo=false	MLQPHPRSTKAQNAAPGLAGSLSSGSLGLAGAAGLSSTSVPFLPPPSRHNGVSHAAAASQALAPSAASSTASLSSQAHSALRGVAAPAAAAGLPGSGAFLPAYASPLYAGQHAGPVAAAKGSRHLLHAHAVGAAGVGGPLTGSAPLQGAVGPSSASPVVHPVLELLQLQNAQVAESRRAVGRPALDPVPVVLGFHHLVHSPEEAAVEVGLVDVVEFPRSPVVLRHVLFLGLGERIHPNVDFEGQSDPAPADCELKVFARVLPPLSEYTATQQKSHANYRPLHANERLAAEAEARVGEGARPVQWRVFELESPETGSPEGEEDLAVDQLVVCGRYRALSVVFFGHVHSTSSKASFFADLSSRPGRAPASPSFVDLAPVSCESVASSCALFSSFSSSPTPT…	0	173.088	15	42	69	42	3736	389.6	5.53	181.93	42	0.974	0.965	0.975	1.018	0.991	0.982	0.992	0.988	0.984	0.999	-0.04	-0.05	-0.04	0.03	-0.01	-0.03	-0.01	-0.02	-0.02	0	0.4536	0.565905	0.628525	0.769518	0.767882	0.100667	0.517016	0.196367	0.349356	0.972612	0.889498	0.902448	0.922119
FALSE	High	Master Protein	TGGT1_316400B-t26_1-p1	transcript=TGGT1_316400B-t26_1 | gene=TGGT1_316400B | organism=Toxoplasma_gondii_GT1 | gene_product=Tubulin alpha chain [Source:UniProtKB/TrEMBL;Acc:S7UL74] | transcript_product=alpha tubulin TUBA1 | location=TGGT1_chrXI:5219470-5220918(+) | protein_length=432 | sequence_SO=chromosome | SO=protein_coding_gene | is_pseudo=false	ELFCLEHGIQPDGQMPSDKTIGGGDDAFNTFFSETGAGKHVPRCVFLDLEPTVVDEVRTGTYRHLFHPEQLISGKEDAANNFARGHYTIGKEIVDLSLDRIRKLADNCTGLQGFLMFNAVGGGTGSGLGCLLLERLSVDYGKKSKLNFCSWPSPQVSTAVVEPYNSVLSTHSLLEHTDVAVMLDNEAIYDICRRNLDIERPTYTNLNRLIAQVISSLTASLRFDGALNVDVTEFQTNLVPYPRIHFMLSSYAPIISAEKAYHEQLSVAEITNSAFEPASMMAKCDPRHGKYMACCLMYRGDVVPKDVNAAVATIKTKRTIQFVDWCPTGFKCGINYQPPTVVPGGDLAKVMRAVCMISNSTAIAEVFSRMDHKFDLMYAKRAFVHWYVGEGMEEGEFSE…	0	172.519	53	17	150	12	432	47.8	5.05	444.15	17	1.028	1.038	1.029	0.967	0.993	1.003	0.994	0.993	0.992	1.011	0.04	0.05	0.04	-0.05	-0.01	0	-0.01	-0.01	-0.01	0.02	0.523418	0.451678	0.721778	0.535204	0.578409	0.737007	0.843291	0.783394	0.562335	0.495847	0.889498	0.902448	0.922119
FALSE	High	Master Protein	TGGT1_261950-t26_1-p1	transcript=TGGT1_261950-t26_1 | gene=TGGT1_261950 | organism=Toxoplasma_gondii_GT1 | gene_product=ATP synthase subunit beta [Source:UniProtKB/TrEMBL;Acc:A0A125YYY4] | transcript_product=ATP synthase beta subunit ATP-B | location=TGGT1_chrVIIb:1457013-1460114(-) | protein_length=560 | sequence_SO=chromosome | SO=protein_coding_gene | is_pseudo=false	MASPALQTCWRNLARLSGAQVRPSHFGAFSLGSRMSPFSSLLGARASPIATGRAGLRFLSSAAPNPGKKPASAAPPAGTNHGRITQVIGAVVDVHFDEQLPPILNSLEVQGHTNRLVLEVAQHLGENTVRTIAMDATEGLVRGQKVVDTGAPIQVPVGVETLGRIMNVIGEPVDECGPVPAKKTYSIHRAAPLFADQSTEPGLLQTGIKVVDLLAPYAKGGKIGLFGGAGVGKTVLIMELINNVANKHGGFSVFAGVGERTREGNDLYHEMMTTGVIKRKKLEDGKFDFTGSKAALVYGQMNEPPGARARVALTALSVAEYFRDEQGQDVLLFIDNIYRFTQAGSEVSALLGRIPSAVGYQPTLATDLGQLQERITTTKKGSITSVQAVYVPADDLTDP…	0	171.701	46	19	93	16	560	59.9	6.87	249.15	19	1.094	1.107	1.105	0.905	0.989	1.001	1	1.002	1.002	1.009	0.13	0.15	0.14	-0.14	-0.02	0	0	0	0	0.01	0.449253	0.413355	0.451689	0.419835	0.0785586	0.419842	0.998063	0.185881	0.932304	0.14166	0.889498	0.902448	0.922119
FALSE	High	Master Protein	TGGT1_224260-t26_1-p1	transcript=TGGT1_224260-t26_1 | gene=TGGT1_224260 | organism=Toxoplasma_gondii_GT1 | gene_product=PHD-finger domain-containing protein [Source:UniProtKB/TrEMBL;Acc:S7WBT2] | transcript_product=PHD-finger domain-containing protein | location=TGGT1_chrX:3059832-3081619(-) | protein_length=5658 | sequence_SO=chromosome | SO=protein_coding_gene | is_pseudo=false	MAGGSMQRAARQSRGRSGGRAGGGGGEGASGSLGDRGCSDTEEERFWIEKDVEFFSAINPRLLALLHHHKQSSEAFLSAVLPYLRSRSRKDAADAAGPSPRSEASQAFALRVPVRDFLRQDWTGGEIGGSVLSGSSAEERRDRRREEMIERDSDPPKRVASSPPCRSRSVEENLTERAVFSRDGRSICSKDPQGAREEASPSCDSLSSPVRRSSSASCLGISQPVSSEAGSEAGSSSVFASGATAVAAGFARTVPTSSRKGAASEGGENSPRSEGGNSVSSRVCSSQGSAPAPVVGCQAHPAPSRLSQVWPHHTGKILLERPSYSGETGRVIRHMWPATLLADVEPSALCPPPLLRSKKAAADPKKKDDSRAYVRTGIEKKNLEESSRLSCGTEETESR…	0	171.214	11	51	64	51	5658	602.2	6.54	155.65	51	0.946	0.957	0.96	1.039	0.983	0.994	0.998	0.981	0.975	0.98	-0.08	-0.06	-0.06	0.06	-0.02	-0.01	0	-0.03	-0.04	-0.03	0.35637	0.43704	0.621805	0.384369	0.285772	0.660174	0.957726	0.110667	0.661228	0.37854	0.889498	0.902448	0.922119
FALSE	High	Master Protein	TGGT1_289330-t26_1-p1	transcript=TGGT1_289330-t26_1 | gene=TGGT1_289330 | organism=Toxoplasma_gondii_GT1 | gene_product=USP domain-containing protein [Source:UniProtKB/TrEMBL;Acc:S7UQR8] | transcript_product=ubiquitin carboxyl-terminal hydrolase family 2 protein | location=TGGT1_chrIX:3004463-3016618(+) | protein_length=2291 | sequence_SO=chromosome | SO=protein_coding_gene | is_pseudo=false	MSRRERKGANELNKSDPNCVPPSLLDSQLALLAANSFDVPLTLKKSTASLSASRSSSPRSVVSANCSSPRTSDFPDRDPLASSVDLPRASPASPASPASVSPRSLGSRSPVSSSFAGNLREREGVCLRGALHLSPSCGAALGSLSPPPLLRTSRSACLSPSVSTDPPRASPLGVSFLSSTMEEDDAALFKVEKGSSRLAAKAPEAGATAGELGVCTPVPGVTPEPSGGVSPPAPKAFGLASSTPRRLNDGSLLEAPLSNELEMVIPRFRARFLEGLEEGDAPVDSLTLYSDWKELPALRFRLMVHPLTRSHSRLAQLSPPSPLLPEARALSPQQQEFLQSRTAAAFVEIGPKPDWPADWSFQAGVRFHIYVVNLSEPERSIWKEETFQFSCEEVDRGWH…	0	171.186	21	43	79	43	2291	247.6	6.01	207.42	43	1.011	1.01	1.011	1.002	1.013	1.013	1.013	1.001	1.004	1.011	0.02	0.01	0.02	0	0.02	0.02	0.02	0	0.01	0.02	0.184934	0.144414	0.787636	0.852763	0.50666	0.344864	0.802733	0.96143	0.883437	0.452904	0.889498	0.902448	0.932285
FALSE	High	Master Protein	P04264	Keratin, type II cytoskeletal 1 OS=Homo sapiens (Human) OX=9606 GN=KRT1 PE=1 SV=6	MSRQFSSRSGYRSGGGFSSGSAGIINYQRRTTSSSTRRSGGGGGRFSSCGGGGGSFGAGGGFGSRSLVNLGGSKSISISVARGGGRGSGFGGGYGGGGFGGGGFGGGGFGGGGIGGGGFGGFGSGGGGFGGGGFGGGGYGGGYGPVCPPGGIQEVTINQSLLQPLNVEIDPEIQKVKSREREQIKSLNNQFASFIDKVRFLEQQNQVLQTKWELLQQVDTSTRTHNLEPYFESFINNLRRRVDQLKSDQSRLDSELKNMQDMVEDYRNKYEDEINKRTNAENEFVTIKKDVDGAYMTKVDLQAKLDNLQQEIDFLTALYQAELSQMQTQISETNVILSMDNNRSLDLDSIIAEVKAQYEDIAQKSKAEAESLYQSKYEELQITAGRHGDSVRNSKIEIS…	0	166.759	43	31	97	25	644	66	8.12	282.57	31	1.369	1.01	1.019	0.356	0.488	0.36	0.363	0.48	0.407	0.316	0.45	0.01	0.03	-1.49	-1.04	-1.48	-1.46	-1.06	-1.3	-1.66	0.224259	0.971202	0.909886	0.0833304	0.214445	0.0478438	0.00139314	0.116718	0.118273	0.0952121	0.889498	0.989013	0.966502
FALSE	High	Master Protein	TGGT1_294620-t26_1-p1	transcript=TGGT1_294620-t26_1 | gene=TGGT1_294620 | organism=Toxoplasma_gondii_GT1 | gene_product=Eukaryotic translation initiation factor 3 subunit C [Source:UniProtKB/TrEMBL;Acc:A0A125YXE7] | transcript_product=putative eukaryotic initiation factor-3, subunit 8 | location=TGGT1_chrIa:989669-996523(-) | protein_length=971 | sequence_SO=chromosome | SO=protein_coding_gene | is_pseudo=false	MQSKFWAAASDESEDSGFSSSESEAEQEQQVPAGEARRPVVASRWAAADTSSSDDEGGRVVKSLKDRRWTAMRETIRQMRNHMKIADFSELYKDYESLVRCLQKSQQIVEQEGLPSFFVRIIVELEQFLEERHRDKEAFKKLSKAKATAFNTLRAKVRKTNEQWQEKVDACKADPSQFASSDSDDDDDFDSDDSSDLSDISDSSESEESDEEKPKRKAMNEDGSEDSEDSEWSDSDASSLSSGEETDKHKAAMAKWGLRSEGDKSRKQKEKKKTKRISKTKDEGALSPRGEAGAEFSIKDMESLFDTNDLDASVIRKRVQLVVEKRGRRGVDRLEQTRILKRLAELAARVGPQSELEVLAHLISAEFDTTSGVFACLSSAIWLDVFHQLEAVLGHLEEG…	0	166.571	28	26	104	26	971	109.1	6.32	293.6	26	1.035	1.039	1.042	0.965	0.999	1.002	1.005	0.993	0.996	1	0.05	0.05	0.06	-0.05	0	0	0.01	-0.01	-0.01	0	0.388498	0.432112	0.344741	0.486629	0.925729	0.603233	0.674508	0.211867	0.723901	0.988942	0.889498	0.902448	0.922119
FALSE	High	Master Protein	TGGT1_204130-t26_1-p1	transcript=TGGT1_204130-t26_1 | gene=TGGT1_204130 | organism=Toxoplasma_gondii_GT1 | gene_product=MACPF domain-containing protein [Source:UniProtKB/TrEMBL;Acc:S7UUF6] | transcript_product=perforin-like protein PLP1 | location=TGGT1_chrVIIa:1864038-1872889(-) | protein_length=1161 | sequence_SO=chromosome | SO=protein_coding_gene | is_pseudo=false	MFVVDLSLSGNMRSLTHGKSIHRSSIVVVTHCSHRLSLSLLNRPALFPSHSDRYTVPWRCRPSSWRLWITFVCLSTLHMFGLSSAVKRDGEVPTANLRASLSPDSSKEDAMLLSAIGGIGPTESRLQHIPFRTTRYLPIRSHVLQSTVERIESPEALNEVPTKVERNEFTEKGDKTEQVLTAQADHKSLLEGRSESTSTAPDDDFDFLFEDDTPKKPKSRVNKGTSSDETSPGDRSSGEGSSDSDSLLSVVHRTKGNATQANKNQTRITHPKSKAQHQKKVTKKQGIPGSDSLGTSSADFDFDIDSSSNTQADDSQRQSLGDSSALDLFGSDTGDTGDIFGFSNSSSDGGNAAANDGGLFSSSGMGPTGASDETSANPLGSILGGVLNPFAQQQSITPM…	0	166.458	34	28	77	28	1161	125.4	6.43	208.16	28	1.05	1.062	1.055	0.983	1.033	1.044	1.037	1.018	1.016	1.037	0.07	0.09	0.08	-0.02	0.05	0.06	0.05	0.03	0.02	0.05	0.681441	0.548476	0.457048	0.903588	0.359532	0.471396	0.667563	0.133834	0.660033	0.47003	0.889498	0.902448	0.922119
FALSE	High	Master Protein	TGGT1_206510-t26_1-p1	transcript=TGGT1_206510-t26_1 | gene=TGGT1_206510 | organism=Toxoplasma_gondii_GT1 | gene_product=Toxolysin TLN4 [Source:UniProtKB/TrEMBL;Acc:S7UUS1] | transcript_product=toxolysin TLN4 | location=TGGT1_chrVIIa:879451-893239(+) | protein_length=2435 | sequence_SO=chromosome | SO=protein_coding_gene | is_pseudo=false	MRRPCLFRSTFLLLLALLPLFSLLSESISPSSRSLPSHQTRALHADLDAARKPASFLSRSEPALSLSSSRETEEDPGRAANASARLPELEAALQEELQAAAVREIASGFSASSTRTLSSSVSSPSHAESVAEAETRPDSSSDPVNDGDSTSGGETPDPLPTLAEVRAALASTVAQSRTFPRRLAAKNGEQVEDGDEELAERKRVRKPPRDTSAYSVFSVPALKLEGVAIADQEEAVGSFAVSVGCGFFHDPPAIPGVAHQLEHLIFLGAEGEEAATSWDEFVSQRGGTHNAHTTAELTTFFVAAPTDTLPELLDRFLLHLFHPLLAAEQFASEVMAVQFEHEKNQPDVARVLLELAMAVTPSLASPASSATQDEVPTSFYRPEVARKFGTGDFDTLCKT…	0	166.201	17	36	63	36	2435	256.7	5.43	170.12	36	1.055	1.063	1.044	1.005	1.061	1.069	1.049	1.005	1.018	0.991	0.08	0.09	0.06	0.01	0.09	0.1	0.07	0.01	0.03	-0.01	0.407123	0.392583	0.61231	0.966638	0.52042	0.465052	0.455177	0.728653	0.518885	0.0865341	0.889498	0.902448	0.922119
FALSE	High	Master Protein	TGGT1_290290-t26_1-p1	transcript=TGGT1_290290-t26_1 | gene=TGGT1_290290 | organism=Toxoplasma_gondii_GT1 | gene_product=UBA_e1_C domain-containing protein [Source:UniProtKB/TrEMBL;Acc:S7UQ93] | transcript_product=ubiquitin-activating enzyme E1 family protein | location=TGGT1_chrIX:3489378-3499339(+) | protein_length=1092 | sequence_SO=chromosome | SO=protein_coding_gene | is_pseudo=false	MATPQESSGAAAHIDTDLYSRQIGAFGLETMGKLITLRVLISGMRGVGAECAKNLILAGPNTVVLHDPAPCEMRDLGSNFCLTEEHVKKGVSRAEASKNYLAELNQYVTVDVLPDEKLTQEVVSRFDVVIVTEAGNEELKKINAFCRSASKPVGFIAANVFGLAASVFVDLGERFVCLDSDGEEPREVIVAGITHERAATVHTHTDKLLPFQDGDFVVFREVQGMEINDLQPMQIRVTGKHSFQIGDTTAFSPYVSGGIARQVKMPQTIRFKSYEASCRAPVAAGEAMLIVPDLGKFGQSEQLHLAFQAVLNFRDRNGGNAHALPPHPLDAARAGSQQAAVAACVAEAQRLNGEAKQLAERGEQGVVFVDQVDEKLVANVAAYAQCQISPMAAFVGGVL…	0	166.136	38	34	83	34	1092	119.7	5.8	230.97	34	1.057	1.051	1.054	0.955	1.009	1.003	1.006	1.033	1.02	1.041	0.08	0.07	0.08	-0.07	0.01	0	0.01	0.05	0.03	0.06	0.513885	0.54415	0.526016	0.481003	0.643836	0.851284	0.728807	0.190852	0.0146266	0.306232	0.889498	0.902448	0.922119
FALSE	High	Master Protein	TGGT1_308890-t26_1-p1	transcript=TGGT1_308890-t26_1 | gene=TGGT1_308890 | organism=Toxoplasma_gondii_GT1 | gene_product=Transcription elongation factor SPT6 [Source:UniProtKB/TrEMBL;Acc:S7W102] | transcript_product=transcription elongation factor SPT6 | location=TGGT1_chrXI:296965-314183(+) | protein_length=3132 | sequence_SO=chromosome | SO=protein_coding_gene | is_pseudo=false	MDSPASSSREAEAGGRLRRPPSDEDMPLKVEKKTKKSKKEKKRERASSEKKRKLKARKSSSSRKKKHRFVKDSAREASDEELRRRSTDSSDEESGSDEDAAIAAEMRGFIVSEESGEEEGESDDSEKENEDEGPQQLDDEDLDLIEENTGLTVRKQPLRPPFDEGESEFEEAEEAEGSGARDSEDADGFAALQSEEQRRYRRLKKVESSAPKSADRPESERGGVSRTREEASGSLFFDDDKGENEFGAATFPALEAPASALDADAASDGGEAVAQGGAGSSLPAKKLVGRRMSRTSASPLGQEDRAEASEEDEAWLEEEDALQDSAAQQRMGETWGLVYDCFGDVDAVVRILCNVKPVKHTASGGEEDEFQGAGDVADEPRRRREGRGREDDEELRGRL…	0	165.655	19	48	68	48	3132	349.6	5.74	172.45	48	0.957	0.925	0.961	1.055	1.01	0.976	1.015	1.042	1.007	1.003	-0.06	-0.11	-0.06	0.08	0.01	-0.03	0.02	0.06	0.01	0	0.28454	0.336483	0.512342	0.44402	0.744601	0.0104436	0.180133	0.0115375	0.686329	0.844184	0.889498	0.902448	0.922119
FALSE	High	Master Protein	TGGT1_236650-t26_1-p1	transcript=TGGT1_236650-t26_1 | gene=TGGT1_236650 | organism=Toxoplasma_gondii_GT1 | gene_product=DEAD (Asp-Glu-Ala-Asp) box polypeptide 17 [Source:UniProtKB/TrEMBL;Acc:A0A125YWJ5] | transcript_product=DEAD (Asp-Glu-Ala-Asp) box polypeptide 17 | location=TGGT1_chrX:5362273-5365892(-) | protein_length=550 | sequence_SO=chromosome | SO=protein_coding_gene | is_pseudo=false	MYSGYGSSSGGGYSGGSNSSYGYGGGYGGSSYGGDSYGGGGYGGSSYGGGMYGGGRPGGGMGMGGYGADALGSKLQRVDWKTIDLVPFEKNFYVEHPAVANMSAEEAERIRRANEITIVHGHNVPKPVPTFEYTSFPSYILDVINQTGFQKPTAIQVQGWPIALSGRDMIGIAETGSGKTLAFLLPAIVHINAQPYLNKGDGPIVLILAPTRELVEQIRAQCRTFAASSKIHHAVAYGGVPKRPQIMELERGAEICVACPGRLIDFLESRVTNLRRVTYLVMDEADRMLDMGFEPQIRKIVSQIRPDRQTLMWSATWPKEVQNLARDLCKEEPVHINVGSLDLQACQNIKQEVMVVQEYEKRGQLMSLLRRIMDGSKILIFAETKRGADNLTRDMRVEG…	0	164.937	52	24	84	22	550	59.9	8.94	254.56	24	1.011	1.025	1.005	0.994	1.005	1.019	0.999	1.019	1.009	0.995	0.02	0.04	0.01	-0.01	0.01	0.03	0	0.03	0.01	-0.01	0.853342	0.790017	0.951939	0.933898	0.697605	0.383593	0.900328	0.558864	0.175767	0.827932	0.934894	0.918997	0.981898
FALSE	High	Master Protein	TGGT1_258240-t26_1-p1	transcript=TGGT1_258240-t26_1 | gene=TGGT1_258240 | organism=Toxoplasma_gondii_GT1 | gene_product=Chromodomain helicase DNA binding protein CHD1/SWI2/SNF2 [Source:UniProtKB/TrEMBL;Acc:S7W7H2] | transcript_product=chromodomain helicase DNA binding protein CHD1/SWI2/SNF2 | location=TGGT1_chrVIIb:3435272-3453383(-) | protein_length=2495 | sequence_SO=chromosome | SO=protein_coding_gene | is_pseudo=f…	MEEVPQPGGTPPNPAGSCPRPLESQGTGFGLMSAQAPLPSQGVSTAPQDSPASGGPVRPGGHPSAHLPPHSLQFLHLKQFHNAQHAQNMQNAQNVHHQMLEANRSRGAPLSSHIGGVTGAKPQTATPPQQQQLLLQQRHQLLVQQRVQQDHLRFQQLQQHLLVAGQHAARGQAQAAPSWPAAQPPHGAAAQPAGAGTPGSFGASMVSATGSGPGAPQFPRPLRPAGPPAMTSSEALQTGAPASSSLASVEPEAASRVPGPDDVPGSGTVEEAQRTLPTASAVDSAGGAAPSATPQTAVLPTQTGPAEGRCGVVGFQMGGGNAGEVQVASAMQRQRQLLQHQQLLQFQQQTFAQQNQTAGTSQRAPNGPNGVGPGLGFFGGEAPAAAQPGIQGGAPASVS…	0	162.073	19	38	58	38	2495	271.7	6.55	146.9	38	1.054	1.034	1.072	0.957	1.009	0.99	1.026	1.018	0.997	0.993	0.08	0.05	0.1	-0.06	0.01	-0.01	0.04	0.03	0	-0.01	0.0464557	0.354204	0.174303	0.0237626	0.158973	0.692117	0.384043	0.813354	0.935376	0.796011	0.889498	0.902448	0.922119
FALSE	High	Master Protein	TGGT1_308810B-t26_1-p1	transcript=TGGT1_308810B-t26_1 | gene=TGGT1_308810B | organism=Toxoplasma_gondii_GT1 | gene_product=Rhoptry neck protein RON9 [Source:UniProtKB/TrEMBL;Acc:S7US41] | transcript_product=rhoptry neck protein RON9 | location=TGGT1_chrXI:240636-248425(+) | protein_length=1086 | sequence_SO=chromosome | SO=protein_coding_gene | is_pseudo=false	ASSEKLSCPRACLIASKSGGKTGTDGHEKTNEVRPDQKGGEGASTTQHEEGQETEQGSEEANSSSSSAPAQSHETPVAEHAPCPHAEEHNATNGSNSAEAASEDSNPHEAVKHTDAHGQTQASDKAQGHDQEEASQSSETPAEENAEEPKQAEEQANASQSSETPAEENAQEPKQAEDQANASQSSETPAEENAEEPKQAEEQANASQSSETPAEENAQEPKQAEDQANASQSSETPAEENAEEPKQAEEQANASQSSETPAEENAQEPKQAEEQANASQSSETPAEENAQEPKQTEEQANASQSSETPAEENAQEPKQAEEQANASQSSETPAEENAEEPKQAEDQANASQSSETPAEENAEEPKQAEEQANASQSSATPAEENAQEPKQAEEQANAS…	0	161.512	49	24	51	18	1086	115.1	4.44	174.07	24	1.059	1.068	1.047	0.934	0.989	0.998	0.978	1.004	0.983	0.964	0.08	0.09	0.07	-0.1	-0.02	0	-0.03	0.01	-0.02	-0.05	0.438745	0.519863	0.470721	0.37201	0.131927	0.941404	0.0944466	0.943101	0.206471	0.505796	0.889498	0.902448	0.922119
FALSE	High	Master Protein	TGGT1_240980-t26_1-p1	transcript=TGGT1_240980-t26_1 | gene=TGGT1_240980 | organism=Toxoplasma_gondii_GT1 | gene_product=hypothetical protein | transcript_product=hypothetical protein | location=TGGT1_chrVI:1573378-1582470(+) | protein_length=1420 | sequence_SO=chromosome | SO=protein_coding_gene | is_pseudo=false	MSGGGSEPLESEAEGFSEAPHAGEETEKSKTAERQSGEKSAASSSLLSLGSRPLEEEGRRKEASPPSTEKKTGGSWFNFLFAKWRGTHKHRNAIQLAQAFGAANQPGKPGPVIGIVVCKGPRNELQGLAVATPRVVERYLLDGRLQQRVAVPEPLTCFVGGKIGGVGRVLLCGTQAGRVFVLKAETFEQLLELDSRAAYATAGVSLDLPCLPPRGGLTFCRDPLGRGGDGGSTRKGNAFWIESSKRERKHEEQSPAGRLDTAASLLVGRAFDGDSSSAAPGRARRVEHRRASAGSSERSESTENDDGESERQREQSEEPIEFPACLAISALAIKATFAEFVHYVIAGNVRGHVFVWQVPSTKLVHLLTFPVDRADAAFLRSQESLSSTSSLSHGAEETL…	0	161.006	31	33	57	33	1420	152.1	5.14	150.07	33	0.929	0.935	0.963	1.067	0.991	0.998	1.027	1.017	1.01	0.991	-0.11	-0.1	-0.05	0.09	-0.01	0	0.04	0.02	0.01	-0.01	0.555238	0.661442	0.820186	0.604671	0.198651	0.938366	0.624203	0.485786	0.583723	0.150012	0.889498	0.902448	0.940034
FALSE	High	Master Protein	TGGT1_275690-t26_1-p1	transcript=TGGT1_275690-t26_1 | gene=TGGT1_275690 | organism=Toxoplasma_gondii_GT1 | gene_product=Putative ClpB [Source:UniProtKB/TrEMBL;Acc:S7UMM6] | transcript_product=putative ClpB | location=TGGT1_chrIII:255659-267189(+) | protein_length=1022 | sequence_SO=chromosome | SO=protein_coding_gene | is_pseudo=false	MQRSCLQISGCSALYLPMAWPRGLSGPPRGRSRRLTPRGRLLFLWGALLVALVQQTVGHTIELSTQATSVFGFIPSGIPAGHRSSIKARFCSSVGRASPLRTVTCSKPQTASWYNNLLYRFNLPHVVEEPSRSTELRMAEDGLVLNSEDYTEKAWEAMGALGELADKLESGYVEAEMLLKALLDDGPDGLATQIFSKAGADVPKMQEELNRHLKTQPRMTMGFSDQKVLGRGLQNVLTAAQRYKREFKDQYLSVEHLVLALAAEDTKFTRPFLTRGNVSFNKLRSAVEDIRGKKKVTSKNPELAYQALERYSRDLTAAARAGKLDPVIGRDDEIRRTIQILSRRTKNNPVLLGDPGVGKTAIVEGLAQRIISGDVPDSLKGRRVISLDMAALIAGAKYR…	0	160.79	33	31	85	31	1022	114.5	7.9	227.1	31	0.93	0.935	0.941	1.041	0.969	0.974	0.98	0.981	0.974	0.964	-0.1	-0.1	-0.09	0.06	-0.05	-0.04	-0.03	-0.03	-0.04	-0.05	0.384247	0.443245	0.507267	0.624333	0.206872	0.101626	0.0579212	0.181935	0.0490892	0.278367	0.889498	0.902448	0.922119
FALSE	High	Master Protein	TGGT1_219860-t26_1-p1	transcript=TGGT1_219860-t26_1 | gene=TGGT1_219860 | organism=Toxoplasma_gondii_GT1 | gene_product=DNA helicase [Source:UniProtKB/TrEMBL;Acc:S7V1T5] | transcript_product=putative replication licensing factor | location=TGGT1_chrXII:515884-525132(-) | protein_length=972 | sequence_SO=chromosome | SO=protein_coding_gene | is_pseudo=false	MDSLASPSRPASRVSGRVSGANAPGNEERRESGRTSFFPSASLGQTQGASLAEGEHAVGSSLEQGDGRDPARMQDENFANIFVHFLQTFQHEEEEEDEADGGRLAPSAIADLPEEIAEAYYMRAMARLIRESHGNRTLVVRLEHVESWQPQGAPVQDAGMRLAEHIRRNYIRIRSRLQESFQLLMEKLAAQMNAPQFSYFLQVVGAQKYVHEIGNIRCNMLGSLLSIRGQVTRTTDVRPELLKAAFKCLECGTIEPDVEQQFKYTQPRQCRGVNCNNTTNWELLFERCRYGDWQKIRLQEPSNASASSSAVPRSLDIIARHDLVDSVYAGDVVVVSGALVALPDLAPLMRPGQLGRRDRPRRNEASLGVTPLTGLKGLGVREMNFRISLLAVDVQTEGE…	0	160.655	41	34	73	33	972	108.1	5.08	182.36	34	0.936	0.931	0.933	1.109	1.038	1.032	1.035	1.015	1.014	0.985	-0.1	-0.1	-0.1	0.15	0.05	0.05	0.05	0.02	0.02	-0.02	0.14471	0.11994	0.230907	0.246411	0.395885	0.465742	0.276362	0.369316	0.447083	0.784275	0.889498	0.902448	0.922119
FALSE	High	Master Protein	TGGT1_317720-t26_1-p1	transcript=TGGT1_317720-t26_1 | gene=TGGT1_317720 | organism=Toxoplasma_gondii_GT1 | gene_product=Putative eukaryotic translation initiation factor 3 subunit 7 [Source:UniProtKB/TrEMBL;Acc:S7UGQ9] | transcript_product=putative eukaryotic translation initiation factor 3 subunit 7 | location=TGGT1_chrIV:2518527-2525070(+) | protein_length=609 | sequence_SO=chromosome | SO=protein_coding_gene | is_p…	MEQASEERPHFEHIANPGSLFGCHPQSAGWGPSTCDKEVRTECLAALAHLPFEPNVRPSLFSHQLFRACDFTFHVQQRQRDGRDPRGITVAFADEEQQFQTVDNRPLLRRGGGGGWLHKRRAPVKQSTAAFNEKNKEEEELRLGKKGKSEQKKQQQQQQARFARIHARHRAFSEWSVQPTNEWAVEAEIPLSQLYKHAVESGKIKVKDLAWRGELRTYNKQADQIRTKLPVALQNLSSNFDYYWVTTQDDDLIKEQMLNSSEPIDVAATDQVLACLMAAPQSKYSWHLHLTKVEGKLLIDKANGSIVDLLTVNETASEPPMQDAENRLNRPAALGFEAVKINQNLRQQLLVKGEEPVKFSPPPFVEAGDNPASIAYRYRMFTIPGRTGGTGGGKSRQPI…	0	160.498	43	23	100	23	609	68.7	6.93	250.98	23	1.001	1.016	1.028	0.994	0.995	1.01	1.022	0.99	1.012	1.02	0	0.02	0.04	-0.01	-0.01	0.01	0.03	-0.01	0.02	0.03	0.882276	0.49567	0.42612	0.820414	0.807342	0.264975	0.0399884	0.307897	0.418467	0.116004	0.949909	0.902448	0.922119
FALSE	High	Master Protein	TGGT1_278660-t26_1-p1	transcript=TGGT1_278660-t26_1 | gene=TGGT1_278660 | organism=Toxoplasma_gondii_GT1 | gene_product=Cation_ATPase_N domain-containing protein [Source:UniProtKB/TrEMBL;Acc:S7UZZ0] | transcript_product=putative P-type ATPase4 | location=TGGT1_chrXII:5863040-5875230(+) | protein_length=1338 | sequence_SO=chromosome | SO=protein_coding_gene | is_pseudo=false	MAARASADKLSTAGEDPAAPVAQVAPDTSSSADGGPSNGASEPGKVGSQPVAAGAEEKVAGHDGESPRRDSHHLRRFSSKRESTVGGSGTGHSQLGKSISSVSQMHRDEHARLLPASSSMSLAPGMGYENVETEVIDRLSKSHVSLKELVETARQSDPEAFRMAVTLTEQSHPTSGKNRFASLPIEELAKEFGLKDMSTGLTEEQVLENRRRYGPNVLEKDKSEPVWKIFIQQFLSPVVLLLLVAAIASLALQEWVEGAAIFIIVTLNASLATYMEKSASNALAKLASMAAPGCVVVREGKAQTVGAVDVVPGDIVLLSTGNSVAADMRCIESVELKTNEALLTGESEDISKTLRAKDYDTPFATNLCFASTIVTNGSGRGLVFATGMETQVGRIAQQL…	0	160.295	32	34	63	33	1338	144.6	6.18	183.91	34	1.028	1.04	1.037	0.975	1.003	1.014	1.011	1.011	1.018	0.992	0.04	0.06	0.05	-0.04	0	0.02	0.02	0.02	0.03	-0.01	0.612049	0.149537	0.140131	0.486056	0.891331	0.530109	0.608607	0.681431	0.639206	0.0899568	0.889498	0.902448	0.922119
FALSE	High	Master Protein	TGGT1_230420-t26_1-p1	transcript=TGGT1_230420-t26_1 | gene=TGGT1_230420 | organism=Toxoplasma_gondii_GT1 | gene_product=Cation_ATPase_N domain-containing protein [Source:UniProtKB/TrEMBL;Acc:A0A125YSA2] | transcript_product=sarco/endoplasmic reticulum Ca2+-ATPase | location=TGGT1_chrVIII:760295-772731(+) | protein_length=1093 | sequence_SO=chromosome | SO=protein_coding_gene | is_pseudo=false	MDLSNEKAVGALSKHRASPNSESGTVSSSPDLLSSLQDVNIHTKAHVLDAEEVVRQLKADAKRGLSEADACERLELFGKNELEQEPGKSLLQLILEQFQDLLVRILLSAAVVSFILALFEGGAEEGVTAFIEPLVILIILILNAAVGVWQESNAEKALEALKELQPAQGRVLRGGVWRLLPSANLVPGDIIDVRCGDKVPADCRVLALKSTTLRVEQSQLTGESVTVNKDAEVLAASYEDCEVQSKSNLLFSSTTVASGHAVAVVVATGMRTEIGKIQSAVQEAGADDEDQTPLQQKLDEFGEILSKVIFVICIVVWVINIKHFSDPVHGGFLRGCIYYFKIAVALAVAAIPEGLPAVITTCLALGTRKMAKKNAIVRKLASVETLGCTTVICSDKTGT…	0	159.995	33	31	91	31	1093	118.8	5.43	263.61	31	0.982	0.97	0.965	1.039	1.02	1.008	1.002	1.016	1.022	1.007	-0.03	-0.04	-0.05	0.06	0.03	0.01	0	0.02	0.03	0.01	0.119455	0.347738	0.140151	0.385805	0.550629	0.502493	0.929252	0.385021	0.0736141	0.660376	0.889498	0.902448	0.922119
FALSE	High	Master Protein	TGGT1_217680-t26_1-p1	transcript=TGGT1_217680-t26_1 | gene=TGGT1_217680 | organism=Toxoplasma_gondii_GT1 | gene_product=hypothetical protein | transcript_product=hypothetical protein | location=TGGT1_chrXII:1930956-1942802(-) | protein_length=2213 | sequence_SO=chromosome | SO=protein_coding_gene | is_pseudo=false	MGGKSPPVPEAAGVGRWTDGASFLVCVKSGLFSLRTVLPLVTIFFCLPSETPFCSPALSSFSAGSFSRPDGVYGEPPLALPATLAAVASATSPEHSTTDESETSGGTIEKRGKGAPAPGHSEGRTRGASSSSVPSTQAKQKGNATQQGPPHETPEQDSSLSVAGRGMEISQTSKHSASRTLSRDARLPLPSQLSFHGWLSSALDNSGEQLWGSWNGGSSEMKKGARTARPSAPGKAKPAFPRLISAVSSGLQETSPETHQDSLQQEASSDTSQLLTSLKSGLPQSAAPTGSERDGSFGSVTEPEVDAAEGWELESQAEAVEKVEASLQKRVSKLTGDIDWLQKQLDGVVGDMQMYRSALVDLRPQRSVEAFEQIAAGGRNFPHRTFLEQLENAVNVMDS…	0	159.984	21	38	81	38	2213	242.9	5.39	195.09	38	0.983	0.983	1.023	1.032	1.014	1.014	1.055	0.997	1.016	0.987	-0.02	-0.02	0.03	0.04	0.02	0.02	0.08	0	0.02	-0.02	0.358907	0.228785	0.398889	0.299662	0.217953	0.634664	0.343799	0.900093	0.0837036	0.17082	0.889498	0.902448	0.922119
FALSE	High	Master Protein	TGGT1_211680-t26_1-p1	transcript=TGGT1_211680-t26_1 | gene=TGGT1_211680 | organism=Toxoplasma_gondii_GT1 | gene_product=Protein disulfide-isomerase [Source:UniProtKB/TrEMBL;Acc:A0A125YQI9] | transcript_product=protein disulfide isomerase | location=TGGT1_chrIV:1556190-1558014(+) | protein_length=471 | sequence_SO=chromosome | SO=protein_coding_gene | is_pseudo=false	MRAGFSFALLAVGLLATAVVYSAAEEEAVTVLTASNFDDTLKNNEIVLVKFYAPWCGHCKRMAPEYEKAAKTLKEKGSKIVLAKVDATSETDIADKQGVREYPTLTLFRKEKPEKYTGGRTAEAIVEWIEKMTGPAVTEVEGSAEDKVTKEAPIAFVAELASKDSDMAKLFEEVANESRQLGRFLAKYGASDEKIYSLRYEEGTEAFTGKTKDELKKFVDTESFPLLGPINAENFRKYIDRDLDLVWLCGTEKDFDEAKTAVREAAKKLRDTRSFVWLDTDQFKGHAENALGITEFPGLVFQSKKGRFVLPEATTSLKDAAKISQFFDDVEAGKIDRSLKSEPVPEKQDEAVKVVVGKNFEEMVIQKDKDVMLEIYAPWCGYCKSFEPIYKEFAEKYKD…	0	159.764	56	27	195	25	471	52.8	5.22	503.26	27	1.143	1.143	1.13	0.875	0.999	1	0.989	1.04	1.007	1.019	0.19	0.19	0.18	-0.19	0	0	-0.02	0.06	0.01	0.03	0.579498	0.588562	0.602112	0.576652	0.60803	0.964873	0.0455019	0.0381499	0.477884	0.522393	0.889498	0.902448	0.922119
FALSE	High	Master Protein	TGGT1_257990-t26_1-p1	transcript=TGGT1_257990-t26_1 | gene=TGGT1_257990 | organism=Toxoplasma_gondii_GT1 | gene_product=Putative heat shock protein 101 [Source:UniProtKB/TrEMBL;Acc:S7UZ38] | transcript_product=putative heat shock protein 101 | location=TGGT1_chrVIIb:3637480-3646383(+) | protein_length=927 | sequence_SO=chromosome | SO=protein_coding_gene | is_pseudo=false	MDADSWTTLVKKAFLAGQEVCRERKNPQLDPLHLLEAMLQDKQSFATQVLSQCPGDFEQLKEDVHLAVLKFPQQHPPPDFPSPNHSLMAVLRHAKDIQKKMNDSLMSADSLFSALIQEKGIRSHLTAAGFMMKQIEEKAKSVRGSKKIASSDDDANFEALKKYGTDFTDLAEKGKLDPVIGREDEIRRVIRILCRRTKNNPVLIGEPGVGKSAVVEGLARRIVEHDVPSNLRCRLVSLDVGSLIAGAKFRGEFEERLTAVLQEVKDAAGKIILFIDEIHVILGAGKTEGALDAANLLKPMLARGELRCIGATTLDEYRKYVEKDAAFERRFQQVHVREPSVQATISILRGLKDRYASHHGVRILDSALVEAAQLADRYITSRFLPDKAIDLMDEACAIA…	0	159.169	43	34	79	33	927	104.2	6.51	242.58	34	0.9	0.89	0.918	1.089	0.981	0.97	1	0.994	1.001	0.967	-0.15	-0.17	-0.12	0.12	-0.03	-0.04	0	-0.01	0	-0.05	0.44249	0.34419	0.487599	0.516077	0.0898924	0.375607	0.99503	0.633035	0.881575	0.386989	0.889498	0.902448	0.922119
FALSE	High	Master Protein	TGGT1_305340-t26_1-p1	transcript=TGGT1_305340-t26_1 | gene=TGGT1_305340 | organism=Toxoplasma_gondii_GT1 | gene_product=Corepressor complex CRC230 [Source:UniProtKB/TrEMBL;Acc:S7VWG3] | transcript_product=corepressor complex CRC230 | location=TGGT1_chrIX:5155746-5169422(+) | protein_length=1916 | sequence_SO=chromosome | SO=protein_coding_gene | is_pseudo=false	MEEVGEGLRGASLSAGAEAFLPKPMATNGARAPEEDAGGSNCVSEKAASFTAENVSFPQSLSRLDSCRCVTNADGHHFLLCQEEENIDILRQSSSSFYPSNPEGVFVLHSPLPPRLTETACTSASDKSSAGPRRVVAVSIPLAVSKSEREARELLKTHLPDWEVALHAFLKKNSIEGSEVLNENPRATMSSDLDRRADGAVDPAATEAPTHAIPSSDAPAPSPPTPLTDETRAAGNDACSSGALTGAAEQATSGFPSQPPALIPKEEPRDDDRPAAVAGNGPQAESGAAATGPASPIGGDSPASGPPAAAPAAALAAPEKTPGGRDGAQVSAHSSLASPGSAAPNGAPAKAPSQAFAETGPQAAAQAAAGAPSRAPAPAAAPQRRPTLFNLLDALAHDS…	0	158.972	25	37	73	37	1916	207.2	5.95	226.14	37	0.911	0.914	0.916	1.108	1.009	1.012	1.015	1.018	1.008	0.978	-0.13	-0.13	-0.13	0.15	0.01	0.02	0.02	0.03	0.01	-0.03	0.415802	0.403159	0.502359	0.423452	0.493905	0.546294	0.316268	0.723143	0.45363	0.336991	0.889498	0.902448	0.922119
FALSE	High	Master Protein	TGGT1_243800-t26_1-p1	transcript=TGGT1_243800-t26_1 | gene=TGGT1_243800 | organism=Toxoplasma_gondii_GT1 | gene_product=AMP-binding domain-containing protein [Source:UniProtKB/TrEMBL;Acc:S7VU20] | transcript_product=putative long-chain fatty acid CoA ligase | location=TGGT1_chrVI:2778396-2788707(-) | protein_length=758 | sequence_SO=chromosome | SO=protein_coding_gene | is_pseudo=false	MGNTQSGPQIVYNVPIEDPVPAGKKRTSIYRSVFSPDAIVDNFADRPCQSAWDLFQRGVAISGEKRCLGTRVKNADGTLGPYQWKTYREVEQLALEVGSGILSLPDAAPKLHFEEETFQQDMRFLAFYSKNREEWAICEQACNAYGITIVPLYDTLGPESTAFILAQTRLRSVVASEECARRLLDSIEAAKSSLAGEPEEAVNASRVTPETSEDAAEQTTEGAGKEEATETAGREEGKKAVAELQAGESKAEKEEIFVKYLFLMDDPGAPAKDLLDQATKLGIQVFTWRHLLEKGKENLIPLTDDVVAKLSTVSTVCYTSGTTSRPKGVLMSHGNFVATIAGAVRGPLTVPSMALHPEDTYLSYLPLAHVYERSLQNILFSLGGSVGFYGGNTLKLLDD…	0	157.922	37	22	66	22	758	83.5	5.52	228.93	22	1.094	1.09	1.095	0.92	1.006	1.002	1.007	1.01	1.027	1.014	0.13	0.12	0.13	-0.12	0.01	0	0.01	0.01	0.04	0.02	0.59462	0.568688	0.484613	0.548001	0.839531	0.84773	0.662075	0.0756247	0.11321	0.132996	0.889498	0.902448	0.922119
FALSE	High	Master Protein	TGGT1_202370-t26_1-p1	transcript=TGGT1_202370-t26_1 | gene=TGGT1_202370 | organism=Toxoplasma_gondii_GT1 | gene_product=Putative T-complex protein 1, epsilon subunit (TCP-1-epsilon) [Source:UniProtKB/TrEMBL;Acc:A0A125YJE9] | transcript_product=putative T-complex protein 1, epsilon subunit (TCP-1-epsilon) | location=TGGT1_chrVIIa:3284056-3290078(+) | protein_length=536 | sequence_SO=chromosome | SO=protein_coding_gene …	MNIATDEFGNPFIILREQEEKKRLKGIEAHKSNILAACAVADTLRSSLGPKGMDKIIVGPDGQVTVTNDGATILNKMQVEHQCARLLVELSQSQDAEIGDGTTGVVILAGNLLSQAYRLIEKGLHPLRIADGFEKASQLAVERIREVVMKKDVYDADKELLVHAAMTALGSKVVSSHQRHLAEICVQAVLTVADRERNDVNFDLIKVDGKAGGLLEQTMLVNGVVLHKDLSHSQMPSVTKNAKIAILTCPFEPPKPKTKHKLDIKTVEDYKKLQAAEQKYFTDMIQKVKEAGANFVICQWGFDDEANHLLLHENIPAVRWVGGVELELIALATQGRIVPRWEELTEAKLGHAGVVREISSGTMGDKMIVIEECKNSKAVTVVVYGGNQMVVAEAERSMH…	0	157.852	49	24	96	24	536	58.6	5.96	259.36	24	1.064	1.077	1.081	0.917	0.976	0.988	0.991	0.98	0.99	0.99	0.09	0.11	0.11	-0.12	-0.04	-0.02	-0.01	-0.03	-0.01	-0.01	0.550083	0.455534	0.472812	0.483246	0.231444	0.614373	0.563884	0.328763	0.687693	0.459281	0.889498	0.902448	0.922119
FALSE	High	Master Protein	TGGT1_253290-t26_1-p1	transcript=TGGT1_253290-t26_1 | gene=TGGT1_253290 | organism=Toxoplasma_gondii_GT1 | gene_product=Valyl-tRNA synthetase [Source:UniProtKB/TrEMBL;Acc:S7W1N6] | transcript_product=valyl-tRNA synthetase | location=TGGT1_chrIII:807307-819700(+) | protein_length=1106 | sequence_SO=chromosome | SO=protein_coding_gene | is_pseudo=false	MPTRHDRTVGETRSPFSSPGESIFLHDTAQPSPSCASRGFPCRSASALSILRDEMVTKKNLDGLMAASYHPGDVEKDWYAWWEQENFFSPTSLSLHQRQVYSGSLPVPVSSELAATTKKENQFVMVIPPPNVTGSLHIGHTLTVAIEDSLARWNRMNGKIVLWVPGADHAGIATQSVVERALLKEGAPSRHELGREAFLRKVWDWKRRYGDTICDQLRRVGSSVSWPHFSFTLDEKLSRAVVEAFVRMYDAGLIYREERLVSWSPYLKTAISDVEVDVEEIDKPKKVTIPGFEYPVEVGYLWHFSYEVEGGGRLEVATTRIETMLGDVAVAVNPTDERYSNLVGKRLIHPFFPEREMRVVADDHVVSTFGTGAVKITPAHDKNDYAIAKRHNLPCISIF…	0	157.654	33	34	100	34	1106	124.8	6.64	253.98	34	0.967	0.967	0.964	1.054	1.02	1.02	1.016	1.027	1.013	1.009	-0.05	-0.05	-0.05	0.08	0.03	0.03	0.02	0.04	0.02	0.01	0.225667	0.24917	0.332943	0.16193	0.0478541	0.00313784	0.285048	0.400253	0.422353	0.245171	0.889498	0.902448	0.922119
FALSE	High	Master Protein	TGGT1_229480-t26_1-p1	transcript=TGGT1_229480-t26_1 | gene=TGGT1_229480 | organism=Toxoplasma_gondii_GT1 | gene_product=Putative calcium binding protein [Source:UniProtKB/TrEMBL;Acc:S7V2K1] | transcript_product=putative calcium binding protein precursor | location=TGGT1_chrVIII:289042-291582(-) | protein_length=335 | sequence_SO=chromosome | SO=protein_coding_gene | is_pseudo=false	MAAFADRPTCRVSLGAVFLARELHRLRKSLPLCVFSLFLFSFAFSALSGAPSQFAEAAMPKLSGEKLAELMQMDVKDIKERMLALFDLIDTNQDNTIDTEEAKEWSAKLKNAMHQHQVRMEFQAIDKDNDGKVSLSELEATYVDSLDQKQLEQHKKEVEQRFKTVDKDNDGLLDLSEIRILMDPGKDEGLMKIEIEEILNAQDKNGDRKITVTEFIETEGTGSLNDVEKTELEKEFKSYDLNADGAIDVEELQQIIKDPHSHEIRMLLEEFTKDLKDGKVGREQWEKEFESFAVSMLTDNGEVLRFPEDYSGIEFPFKTAVPQVDVDDEDKHDEL	0	155.165	66	19	98	18	335	38.3	4.69	266.66	19	1.096	1.058	1.05	1.012	1.109	1.071	1.062	1.016	1.065	1.129	0.13	0.08	0.07	0.02	0.15	0.1	0.09	0.02	0.09	0.17	0.10237	0.282147	0.249426	0.735725	0.0705018	0.00452085	0.0685493	0.766574	0.0733502	0.124527	0.889498	0.902448	0.922119
FALSE	High	Master Protein	TGGT1_272910-t26_1-p1	transcript=TGGT1_272910-t26_1 | gene=TGGT1_272910 | organism=Toxoplasma_gondii_GT1 | gene_product=T-complex protein 1 subunit delta [Source:UniProtKB/TrEMBL;Acc:S7V3B1] | transcript_product=T-complex protein 1 delta subunit | location=TGGT1_chrVIII:3700329-3707666(+) | protein_length=542 | sequence_SO=chromosome | SO=protein_coding_gene | is_pseudo=false	MAAADVATKSGGSKPSAGKHDGMWAHDEKQKDIRRQNIIAAKAVADAVRTSLGPRGMDKMIQGPRGDVLITNDGATILNEMAVVHPVAKMMVELSKAQDVEAGDGTTSVVVLCGALLEASQQLLDRGVHPQLIASSFLEASKQSEKILREMAVPVDLKDREKLIQIAATSLQSKVVSHNAKLLAPIAVDAVMKVLPEGKDVDNVDLNDIRVVKKLGGTVDESELVKGIVMVEQKVSKRAGGPSRIQNAKIGLIQFCLSAPKTDMENNIVIKDYTAMDRMLREERILIAKMVKQIAATGCNVLLIQKSILRDAVNDLSLDYLAKAKIMVVQNIEREDVEFISRTLGCQPVASLDHFTTDKLGHADLAQDEMVAGGGHIVRITGVNAKNTVTVLLRASNNL…	0	154.529	48	24	87	24	542	58.6	7.23	223.93	24	1.031	1.019	1.035	0.961	0.991	0.979	0.995	1.005	0.99	0.989	0.04	0.03	0.05	-0.06	-0.01	-0.03	-0.01	0.01	-0.01	-0.02	0.586851	0.752176	0.434263	0.452295	0.344436	0.3181	0.556141	0.663037	0.329521	0.335108	0.889498	0.91014	0.922119
FALSE	High	Master Protein	TGGT1_224460-t26_1-p1	transcript=TGGT1_224460-t26_1 | gene=TGGT1_224460 | organism=Toxoplasma_gondii_GT1 | gene_product=Putative aminopeptidase n [Source:UniProtKB/TrEMBL;Acc:S7UWT6] | transcript_product=putative aminopeptidase n | location=TGGT1_chrX:2956872-2964821(+) | protein_length=970 | sequence_SO=chromosome | SO=protein_coding_gene | is_pseudo=false	MVTLSATTMNATVSPCRISGGVSSRLCGWGVLSFLLASVITVQVSRAGEEKEEPKAVVRLDYKPPNFYLEDIVLDFNLDDEDTTVEALLTLYRRAGTEPMNLVLDGDESVILKSISLATTSSPSLRGQGRVTFTELDGQMPTDSQFQFRIVDGNLMVSKFLLPREAEVRFYIRTLVSINPKANLALFGLYKAGDIFVTLNEPSGFRRITYGVDRPDVLATYTVTVTAPRHLPILLSNGDKVLSGYAGENRHFAKFVDPFPKPSYLFALVAGDFASVSGEFVTMSGRSVTVTIYAQHHQRNQLQWALRSLLRAMRWDEETFGREYQYSEFRVLCVEVFNPGAMENTSLNIFTCSLLLADPKLTTDADHRLIVDVVSHEYFHNWTGNRVTVQDWFQLTLKE…	0	152.266	42	36	83	34	970	108.7	5.92	195.39	36	1.016	1.039	1.044	1.007	1.024	1.046	1.051	0.968	0.975	0.949	0.02	0.06	0.06	0.01	0.03	0.07	0.07	-0.05	-0.04	-0.08	0.735673	0.663372	0.570614	0.958045	0.794518	0.467315	0.51827	0.102176	0.21193	0.249258	0.894792	0.902448	0.922119
FALSE	High	Master Protein	TGGT1_216620-t26_1-p1	transcript=TGGT1_216620-t26_1 | gene=TGGT1_216620 | organism=Toxoplasma_gondii_GT1 | gene_product=EF hand domain-containing protein [Source:UniProtKB/TrEMBL;Acc:S7VUJ8] | transcript_product=EF hand domain-containing protein | location=TGGT1_chrXI:5927325-5957645(+) | protein_length=3700 | sequence_SO=chromosome | SO=protein_coding_gene | is_pseudo=false	MDTRLKPVRAREKRRSFFYDQLPPPSSGPSFQTGEDASSTPASRASTPSAAAAAAAAAEAAVHASEASSSSPRGRGSSCLSTSSALDGSSTLGSTKLLSFSPGSSGSAANSAYSGAAGVSLHPSRGSVGYDLGSRGAIASSASAAQAAAAAVASLQQEGGTGRERDSFRPSLRRVQSHSRLSIGAGEAALSGDRQWVGESGRRLARAALAATAAASLGSLRRGKESTLPGKRGGSAGSLLPVKEEDEEDERGRRCSEVESDNMKGSDDGHDPEDGAQFENQGQLGTDFMRNVPMVVGIPVYGVGTGVTLGSFLGLLLVGLFMTYLFTTWYAANILSVDLPLPASGLDATLHLRNCAVQFHPLPEEEKAAGRGSFVRMSAWLGFQEVPRHARSREQTLDD…	0	150.663	14	41	59	41	3700	411.7	6.32	146.5	41	0.97	0.979	0.979	1.036	1.005	1.014	1.014	0.981	1.02	0.976	-0.04	-0.03	-0.03	0.05	0.01	0.02	0.02	-0.03	0.03	-0.03	0.230404	0.0619299	0.579202	0.233921	0.253985	0.531203	0.793656	0.490624	0.741357	0.491207	0.889498	0.902448	0.922119
FALSE	High	Master Protein	TGGT1_270510-t26_1-p1	transcript=TGGT1_270510-t26_1 | gene=TGGT1_270510 | organism=Toxoplasma_gondii_GT1 | gene_product=AA_TRNA_LIGASE_II domain-containing protein [Source:UniProtKB/TrEMBL;Acc:S7WKJ0] | transcript_product=asparaginyl-tRNA synthetase (NOB+tRNA synthase) | location=TGGT1_chrVIII:5218409-5221722(+) | protein_length=676 | sequence_SO=chromosome | SO=protein_coding_gene | is_pseudo=false	MPRRCWQLFVCCSVREFPVSVASRLLLPLLFVLASARNSALLYSSALTLRSSAAPLAFSSAGCRFRGSLHRPRFPVRLPPPDQAYLSRNSASGTSPRSIRQFPVPSGLALPTSVPLCARTLPPLSRHFASAGTMAQPQGESKSFTPGHLEDQVPTSCKQAIPVFGCGSTRVRLAALLDGGEASVEKFVNRETPVTVCGWSRSVRKQGGGSLCFVVLSDGSTSSNLQVVVEAGIGGEFPQLLKCGAGCSFRFTGDIVKSPAKGQAVELAVRDPSKGHRFEILGMTDAAKYPLAKKEHTREYLREIAHLRPRSYLIGAVMRVRSNLAMATHRFFQDRGFLYIHTPIVTASDCEGAGEMFQVSTLLPPPPPETRENEKKTDGAAPKDAAAAAAEPLIPLTKD…	0	150.572	37	24	145	24	676	74.9	8.03	346.03	24	1.003	1.013	0.996	0.983	0.986	0.996	0.979	1.005	0.991	0.973	0	0.02	-0.01	-0.02	-0.02	-0.01	-0.03	0.01	-0.01	-0.04	0.889156	0.651515	0.867107	0.194797	0.639426	0.896256	0.547205	0.740483	0.707435	0.664607	0.952492	0.902448	0.953451
FALSE	High	Master Protein	TGGT1_263090-t26_1-p1	transcript=TGGT1_263090-t26_1 | gene=TGGT1_263090 | organism=Toxoplasma_gondii_GT1 | gene_product=14_3_3 domain-containing protein [Source:UniProtKB/TrEMBL;Acc:A0A125YLJ3] | transcript_product=14-3-3 protein | location=TGGT1_chrVIIb:786880-789511(+) | protein_length=323 | sequence_SO=chromosome | SO=protein_coding_gene | is_pseudo=false	MVSTDIAFSSAKKSTRRPLLVFHRPARDFFVFLRFPSFFSGHFPSFPLLLSCVPVSTMAEEIKNLRDEYVYKAKLAEQAERYDEMAEAMKNLVENCLDEQQPKDELSVEERNLLSVAYKNAVGARRASWRIISSVEQKELSKQHMQNKALAAEYRQKVEEELNKICHDILQLLTDKLIPKTSDSESKVFYYKMKGDYYRYISEFSGEEGKKQAADQAQESYQKATETAEAELPSTHPIRLGLALNYSVFFYEILNLPQQACEMAKRAFDDAITEFDNVSEDSYKDSTLIMQLLRDNLTLWTSDLQADQQQQEGGEKPAEQADQ	0	149.037	60	21	150	18	323	37.2	5.14	412.66	21	1.177	1.051	0.97	1.067	1.257	1.122	1.035	0.874	1.201	1.365	0.24	0.07	-0.04	0.09	0.33	0.17	0.05	-0.19	0.26	0.45	0.622335	0.673725	0.769853	0.836454	0.0178375	0.603371	0.870449	0.465001	0.299659	0.0638775	0.889498	0.902448	0.928904
FALSE	High	Master Protein	TGGT1_208370-t26_1-p1	transcript=TGGT1_208370-t26_1 | gene=TGGT1_208370 | organism=Toxoplasma_gondii_GT1 | gene_product=Putative myosin heavy chain [Source:UniProtKB/TrEMBL;Acc:S7UJT6] | transcript_product=putative myosin heavy chain | location=TGGT1_chrIb:652389-657163(+) | protein_length=1124 | sequence_SO=chromosome | SO=protein_coding_gene | is_pseudo=false	MRNRRRGLLIFGIVTAMLWLFIDVTTTESAGVQPLTAEAASPGGIPESRPLRYPFPATASKLNRNATYRVRGKTCAYTYRSNDGSFNFTPVPEGGLLNVASLENVEVLNDPLAQAIEDANVVGELVERAKNRRSDVGGDVDEFVLRAETLATELKQALVTRDLARVEQTEEAFRKDFDALREVHSSIQNVQGEMQTALDRGKELLVHLEGIAKNLRDNALLNKVLRMYSTQLQNEMAASVRERASTEAFIAQSNETMKRLQKEYREGMENLEKHKQILQQVDDVGKQLLGIGSVRKVMHAALKTAQEIKTQSAAAEQDADRGLVRVEALSYACNRSETEIRNEMSKLLKVETELLKAVEEMEHRLKGGPRSKTSEAARLALEEMRNRIQRSAHSVEDLG…	0	148.672	32	36	70	36	1124	124.7	6.29	195.19	36	1.098	1.071	1.091	0.918	1.008	0.984	1.002	0.996	1.001	1.011	0.13	0.1	0.13	-0.12	0.01	-0.02	0	-0.01	0	0.02	0.526996	0.620317	0.415383	0.613238	0.772257	0.580632	0.976457	0.889593	0.919338	0.64666	0.889498	0.902448	0.922119
FALSE	High	Master Protein	TGGT1_273460-t26_1-p1	transcript=TGGT1_273460-t26_1 | gene=TGGT1_273460 | organism=Toxoplasma_gondii_GT1 | gene_product=Eukaryotic translation initiation factor 3 subunit L [Source:UniProtKB/TrEMBL;Acc:A0A125YVE2] | transcript_product=eukaryotic translation initiation factor 3 subunit 6 interacting protein | location=TGGT1_chrVIII:3489847-3495730(-) | protein_length=639 | sequence_SO=chromosome | SO=protein_coding_gen…	MSGEGQVADAGSLPVEKREEGAQVGHEEDDSLSPDSRFPVSPSNQASQNVEGEGLDDAALDRMMGEKVRFENDVEEFLRSLYDEVYDRNVDAIRRLYEVEFPALTERYYAERRWPSVDEVGTFYRQFDRYHCLIITLYKELYYRHLFLKCQQEITWEDRRLAWENYALLINFLAEVECRPDDQKDGKSLRLPLQWLWDILDEFVYQFQEACRWRQRIARRLPEDEEERALFLKEMDKDCDVWKASPVLEFLHALVQRSEVQDLLRQPKDDATKNKLFESEIRFQLGYFAMILLLRLHVLMGDYFMGVKSVESIELASRGFYWKVPAAHVTLFYHLGFAYTMMRRYTDAIRVMSQLLVFVSRQRSYLSAHFYQQMAMNKAVDKMYILVMLCASLCNVKLD…	0	148.248	44	27	88	27	639	75	5.71	260.45	27	0.957	0.957	0.965	1.068	1.022	1.021	1.031	0.998	1.033	0.99	-0.06	-0.06	-0.05	0.09	0.03	0.03	0.04	0	0.05	-0.01	0.296484	0.507366	0.560395	0.360424	0.468822	0.112528	0.0192539	0.864435	0.175038	0.857222	0.889498	0.902448	0.922119
FALSE	High	Master Protein	TGGT1_217460-t26_1-p1	transcript=TGGT1_217460-t26_1 | gene=TGGT1_217460 | organism=Toxoplasma_gondii_GT1 | gene_product=Glutaminyl-tRNA synthetase (GlnRS) [Source:UniProtKB/TrEMBL;Acc:S7V1H6] | transcript_product=glutaminyl-tRNA synthetase (GlnRS) | location=TGGT1_chrXII:1787579-1795013(-) | protein_length=860 | sequence_SO=chromosome | SO=protein_coding_gene | is_pseudo=false	MALSPGAVLRITRLASLPPLSTVTDVVLAYIEQNLKSAGDFTFSVQPDTSSTPAAPFRIAVETKKGEQPSPIAAGEALSDYAAARCIARLAASTGDPFASLLKASGAPGGVEAAVDVCEQWAAFYGVSGKAPEASDNPGLSACIDFFARRFSTSSSFLFGTPQPSLADMTLFALLKAHPAAQTALSSALRTSETAAKHFSSWSACVAKAIPGAGALSGAGAKGTDRAKGKSGEMVGQGAGVASEAVDGPDATTSVNFLKQIVEEDLRTGKHKTVVTRFPPEPNGFLHLGHAKSVCLNFGLAKAFGGRCHLRFDDTNPMKEETRYIESIQRDVRWLGGDWGNHLYYASDYFQQLYDWAELLIKKGLAFVDDDSLEEIRRKRGSISQPGENSPFRERSIEE…	0	148.037	37	27	88	26	860	95.4	7.39	237.54	27	0.928	0.936	0.938	1.075	0.997	1.006	1.008	1.006	1.002	0.992	-0.11	-0.1	-0.09	0.1	0	0.01	0.01	0.01	0	-0.01	0.5263	0.58382	0.611902	0.547027	0.494336	0.236236	0.50614	0.600811	0.910456	0.732276	0.889498	0.902448	0.922119
FALSE	High	Master Protein	TGGT1_310150-t26_1-p1	transcript=TGGT1_310150-t26_1 | gene=TGGT1_310150 | organism=Toxoplasma_gondii_GT1 | gene_product=AMP-binding domain-containing protein [Source:UniProtKB/TrEMBL;Acc:S7W186] | transcript_product=AMP-binding enzyme domain-containing protein | location=TGGT1_chrXI:1055873-1060273(-) | protein_length=866 | sequence_SO=chromosome | SO=protein_coding_gene | is_pseudo=false	MPVSGARASCGDSYSVLATQLARVRRTFFLSAGDVVTRKKHAFDAVSLVFGWKLSASSGVVNECSRLNLVDIRPATSEKESLFQRCSETRRRKPLGILDTMIYATPVGSPGPGESATWQSTGFAAYSASPMPLGESSYRTLLDPDLQVDSFAGSRILDPLTDDDWWESAYGIFLVGVSAHAGPEKPCIGERRSAAIADGFDYTTYAQVDETVRALGSGLADLMRKDGIKLETFPDEERNDGKFANVGILLQSRKEWLFTDLAVSAYPPLTSVTLHYTFPAEHVKSIAEQSKLSCIVTDVDKLKLLAELKPSLGELKTIVVMSARSPLDPPEELDLSGEKKDFAALGVELLSFDEVIDIGRKHPTRPVVKQDPERVFTIVYTSGTTGNPKGVMLTNRNWV…	0	147.185	37	30	84	29	866	95.9	7.24	180.29	30	0.985	1.002	0.984	1.002	0.986	1.003	0.986	1.009	1.003	1.016	-0.02	0	-0.02	0	-0.02	0	-0.02	0.01	0	0.02	0.643228	0.917862	0.619987	0.949308	0.172755	0.748574	0.105432	0.720199	0.898133	0.0459187	0.889498	0.965156	0.922119
FALSE	High	Master Protein	TGGT1_250770-t26_1-p1	transcript=TGGT1_250770-t26_1 | gene=TGGT1_250770 | organism=Toxoplasma_gondii_GT1 | gene_product=Putative eukaryotic initiation factor-4A [Source:UniProtKB/TrEMBL;Acc:A0A125YLG0] | transcript_product=putative eukaryotic initiation factor-4A | location=TGGT1_chrXII:5123731-5125767(-) | protein_length=412 | sequence_SO=chromosome | SO=protein_coding_gene | is_pseudo=false	MENNEDKQQQGQQAGGAAVAAPTPANDEVIETNYDEVVDSFDALKLNESLLRGIYSYGFEKPSAIQQRGIKPILDRHDTIGQAQSGTGKTATFAIAALQLIDYNINNCQVLILAPTRELAQQIQKVVLALGDYLQVRCHACVGGTVVRDDIAKLKAGVHMVVGTPGRVHDMMEKRHLRVDDMKLFIMDEADEMLSRGFKSQIYDVFKKLPPDVQVALFSATMPQDILELTTKFMRDPKRILVKNDELTLEGIRQFYVAVEKEDWKLETLCDLYETLTITQAIIYCNTRRKVDFLTSKMSERDFTVSSMHGDMDQKSREMIMREFRSGSTRVLITTDLLARGIDVQQVSLVINYDLPATKENYIHRIGRSGRFGRKGVAINFVTSSDVEQLKEIEKHYNT…	0	146.76	61	21	138	19	412	46.6	5.67	388.8	21	0.917	0.933	0.931	1.083	0.992	1.01	1.008	1.035	1.024	1.001	-0.13	-0.1	-0.1	0.11	-0.01	0.01	0.01	0.05	0.03	0	0.374439	0.448273	0.414494	0.416007	0.221772	0.115814	0.42858	0.0829393	0.178117	0.962007	0.889498	0.902448	0.922119
FALSE	High	Master Protein	TGGT1_263870-t26_1-p1	transcript=TGGT1_263870-t26_1 | gene=TGGT1_263870 | organism=Toxoplasma_gondii_GT1 | gene_product=GST C-terminal domain-containing protein [Source:UniProtKB/TrEMBL;Acc:S7WDQ1] | transcript_product=glutamate-tRNA ligase | location=TGGT1_chrVIIb:247108-256643(-) | protein_length=828 | sequence_SO=chromosome | SO=protein_coding_gene | is_pseudo=false	MHSRGTPGQKRRGRRHRGVANAENRLFVAVSRHNFSLNSLLTFELGVSVWPEQELLKNPLLVASPTSTLRPARKRRVESLTRCRDTATLLSFVFSVQKTESGSEEVFTDIAAAKLLCTLSSKTRLLYPAAAPAPSFADASETACIDTMLSLATSLQVSSLSPKQLGSLSSHLQLRTFLCGFHLSLADLAVYTQLRRHANNEQQGGAPPQGWKDKFVHVSRWYAFIHGQPQISNVVAVALRKAGANAKGAEASKNEGKKREGRANSSGASSPPSADKRAAAAQASYEGKLEGAVQGKVVTRFPPEPSGYLHIGHAKAALLNSYFAQKYNGKMLFRFDDTNPAKENDEFESSIAEDLRLLNVEWAAISHTSDYFEQMQSLCERLIKEGKFYVDDTPTELMR…	0	146.177	35	26	87	26	828	92.5	8.85	232.28	26	1.054	1.042	1.036	0.947	0.998	0.987	0.981	1.005	0.983	0.982	0.08	0.06	0.05	-0.08	0	-0.02	-0.03	0.01	-0.02	-0.03	0.643296	0.67453	0.745582	0.556839	0.926349	0.365087	0.512206	0.704701	0.186847	0.426594	0.889498	0.902448	0.926505
FALSE	High	Master Protein	TGGT1_289690-t26_1-p1	transcript=TGGT1_289690-t26_1 | gene=TGGT1_289690 | organism=Toxoplasma_gondii_GT1 | gene_product=Glyceraldehyde-3-phosphate dehydrogenase [Source:UniProtKB/TrEMBL;Acc:S7UQ54] | transcript_product=glyceraldehyde-3-phosphate dehydrogenase GAPDH1 | location=TGGT1_chrIX:3189155-3191218(-) | protein_length=489 | sequence_SO=chromosome | SO=protein_coding_gene | is_pseudo=false	MALLTTVRDSCFYFPQKTASRHVFLACVTALLQRSDPTFFCEQSTSMQPEADSAWQPDAGTVSLLTRVKDLRVAIAPVLWKSAEAHEHRHHPSACCGPVERNLLQYTARPAPPPFPDLAPSLLWPRARLRTKKIAGRSYTTPDCRHFAKMVCKLGINGFGRIGRLVFRAAMERGDVEVLAINDPFMSLDYMVYLLRYDSVHGHYPGEVSHKDGKLIVGGKAVTVFNEKEPTAIPWGQAGVHYICESTGIFLTKEKAQAHLTNGAKKVIMSAPPKDDTPMFVMGVNNDQYKSSDVIVSNASCTTNCLAPLAKIVHDKFGIVEGLMTTVHAMTANQLTVDGPSKGGKDWRAGRSAGVNIIPASTGAAKAVGKIIPSLNGKLTGMAFRVPVPDVSVVDLTCK…	0	146.048	45	19	144	18	489	53.3	8.31	397.97	19	1.127	1.128	1.136	0.88	0.992	0.993	0.999	0.986	0.981	0.998	0.17	0.17	0.18	-0.18	-0.01	-0.01	0	-0.02	-0.03	0	0.443983	0.466198	0.488245	0.403773	0.425532	0.68964	0.987589	0.481121	0.472162	0.909402	0.889498	0.902448	0.922119
FALSE	High	Master Protein	TGGT1_219310-t26_1-p1	transcript=TGGT1_219310-t26_1 | gene=TGGT1_219310 | organism=Toxoplasma_gondii_GT1 | gene_product=DnaK family protein [Source:UniProtKB/TrEMBL;Acc:S7V1R0] | transcript_product=DnaK family protein | location=TGGT1_chrXII:915528-922343(+) | protein_length=818 | sequence_SO=chromosome | SO=protein_coding_gene | is_pseudo=false	MAVIGIDLGSLNSVMATVQRGTVSVVTTELSDRVTPSLVGFTEDRRLMGDHALAQMKSNAKNTCRYFKNILGEVFDASNSHLKKEMELSLNNMAAVSPNNVMGYRVQYRGKEVEFSAERVAAAFLTKLRQVAESSLQKPVSEVVIACPPWCRDANRSALLDAAQIAGLKCLRIISDMAATCLDYGMYRRQHFAADRPHIVAFVGVGHSSTSACIAAFWADRLRILAEVSDCELGGRDMDYEIMKHFASAFEKKTKMNPLSSLKARLKLEDQANKAKKILSANSETSFHVECLMEDEDCSGLLTREVFEELCSKTLVPRMETLLQSLLTKSGLKKEDLFSVEIVGGGTRIPWVQKCISNAFGLELSRTLAADETVARGCALQAAMASASFKVKEYGFGER…	0	145.755	39	28	86	28	818	90.1	5.35	241.62	28	0.974	0.995	0.986	1.009	0.983	1.004	0.995	1.008	0.996	0.991	-0.04	-0.01	-0.02	0.01	-0.02	0.01	-0.01	0.01	-0.01	-0.01	0.178201	0.770111	0.356532	0.701085	0.33505	0.561214	0.673533	0.465522	0.755325	0.0554169	0.889498	0.91393	0.922119
FALSE	High	Master Protein	TGGT1_280600-t26_1-p1	transcript=TGGT1_280600-t26_1 | gene=TGGT1_280600 | organism=Toxoplasma_gondii_GT1 | gene_product=AA_TRNA_LIGASE_II domain-containing protein [Source:UniProtKB/TrEMBL;Acc:S7W2N3] | transcript_product=putative histidyl-tRNA synthetase (HisRS) | location=TGGT1_chrVIIa:251998-256202(-) | protein_length=1252 | sequence_SO=chromosome | SO=protein_coding_gene | is_pseudo=false	MLPSKIRSSRGLSRCLYSPHHVHPVSQKGILWFPCISPARRSGQGLGASVFGSFVPRSAGIRFCSARYLDWWQSPTASSASLHGRTFPPCPRESRRRCFPGYPNSLWLLLCQPFVRGVCTLPSTKTFAAGGLSTGKMASSVPPPPLGSRPLTLDELSAYTFGNFACVVDPAVVPKLSREFGRRFPQGGNTECFSSLNLPALPEGAPVLHSTAVRATAVLRIVSLLNNAGGVRTGILTSLCSLLNEASPPVTKLPRHPLPLASSVPLAPFSTYPSALQYMLNGAVEHLAKADPSAPQAISIDEAAAFCGGCSEVAGRLFVASRLLSVLVTLQDCNAALLTEALLVPTDFFSHQQRRLPPIKGIEKSATNIGNLLHDSKLPASSRKSVAEVNATCPSLALL…	0	145.449	25	29	73	29	1252	134.8	7.55	187.21	29	0.943	0.946	0.945	1.063	1.003	1.006	1.005	1.001	1.02	0.982	-0.08	-0.08	-0.08	0.09	0	0.01	0.01	0	0.03	-0.03	0.583148	0.599666	0.569808	0.490461	0.877842	0.767685	0.694016	0.978222	0.0834327	0.522533	0.889498	0.902448	0.922119
FALSE	High	Master Protein	TGGT1_310750-t26_1-p1	transcript=TGGT1_310750-t26_1 | gene=TGGT1_310750 | organism=Toxoplasma_gondii_GT1 | gene_product=GOLD domain-containing protein [Source:UniProtKB/TrEMBL;Acc:S7W275] | transcript_product=emp24/gp25L/p24 family protein | location=TGGT1_chrXI:1533084-1537096(+) | protein_length=601 | sequence_SO=chromosome | SO=protein_coding_gene | is_pseudo=false	MKALLVLSALLAACLQGRLASAADQTDGVPPDSQQYYQNYQQNQYYAPEEENGVPPPPPVNTYGSADVGSNAGGTPPAAAPYYPPPQQQGYVPQDQQGYAPPAQQGYNAPPQVPPSHQVPPQYQQQYAPQYQQQRHPGYAQQYAGGVPPQQAQGGYQQNRPVPGPQGGSGYGAPAPVGQQAPPPPQYKAPPPQGTPQQGYPQGGARAPPPASARTGQPAPAAAAPGYQTQRQGQQPQRPAPAGQVPQAGQPAPARQQQRPTPPAQQPRQSPPPPQQTPQQTQQRTPSQQTQQQRAAAPQQARQAPAASQQQRPVQTGGANQGAGTPRAGVQTPQAGVGAGVQTPQAQGGATQQRQQAQRAAPQRAEMKPAAPDEDSEEEEGDLEERIRREDEGQLFDDD…	0	144.621	49	18	57	18	601	64.9	5.85	190.62	18	0.946	0.973	0.977	1.082	1.023	1.053	1.057	1.041	1.058	1.031	-0.08	-0.04	-0.03	0.11	0.03	0.07	0.08	0.06	0.08	0.04	0.598045	0.834679	0.891387	0.585901	0.553107	0.0151964	0.313398	0.604192	0.392078	0.166218	0.889498	0.933725	0.960195
FALSE	High	Master Protein	TGGT1_224350A-t26_1-p1	transcript=TGGT1_224350A-t26_1 | gene=TGGT1_224350A | organism=Toxoplasma_gondii_GT1 | gene_product=Putative aminopeptidase N [Source:UniProtKB/TrEMBL;Acc:S7WBR7] | transcript_product=putative aminopeptidase N | location=TGGT1_chrX:2967893-2975546(-) | protein_length=1219 | sequence_SO=chromosome | SO=protein_coding_gene | is_pseudo=false	MVWRRTKAKGWRPSAGVERKKSTADRDTRGRHLVRSGASSLGGCAACELWRGKTDREAEDRRIEPYALQKSDKSCVQTLLRAGASVKKEKTRPNHGEGDTSPTASGSACVRAQRGVQAASSRLAHQESAGSLPLISFFSSGAANATASTSLWQRETPETALETPPFLLSAASRGCPRFGCMDTSQVCQRGLDLRPSCTSKKVDFRRFAPAFCGQNATAELFSSEGKCEKLNRVPPRPPQAAADASAHRLASVHVPFSRVSSPCLQQLFPFDASASSPSRFASLLAATASTELPSASPALGEATVPKRRSPFAPSLSRHSSVFLLSPKVTLLALLFCLLAFCAFSRGLSLSPAETSPLAPPATRMRPSTSQLCLRSALPPSLRGKDWCSHAQQRRLDPLA…	0	143.484	27	32	95	30	1219	134.3	7.72	231.1	32	1.041	1.056	1.066	0.938	0.977	0.991	1	0.99	0.995	0.976	0.06	0.08	0.09	-0.09	-0.03	-0.01	0	-0.02	-0.01	-0.03	0.678438	0.660094	0.60881	0.571605	0.188486	0.626947	0.999039	0.440824	0.0228932	0.44486	0.889498	0.902448	0.922119
FALSE	High	Master Protein	TGGT1_321680-t26_1-p1	transcript=TGGT1_321680-t26_1 | gene=TGGT1_321680 | organism=Toxoplasma_gondii_GT1 | gene_product=HABP4_PAI-RBP1 domain-containing protein [Source:UniProtKB/TrEMBL;Acc:A0A125YT80] | transcript_product=hypothetical protein | location=TGGT1_chrIb:1645852-1649258(-) | protein_length=372 | sequence_SO=chromosome | SO=protein_coding_gene | is_pseudo=false	MAPQRKYYTVGVSNKFSAFADNDSEGGDSSGEEDVILSSPPVPTAETQSTGKQLSGTNAGSAAGKKANEGVSAHHDSERRPRASAGGRYGREDQSAANAYRQGEFGGRGRGGQRGRFPRRNFVQGEENEENVEQTFGVRRGNFRGGRGRGGFYSRGRGGVQGDRHTAAAMGGRDPKKGGGGAHNWGDDERVAAAGEQEVEKTEEEKEKRQDSEEAEEEKKGGEEDVEEEKKDEEVLDLEAYKKMLEGKRQNLPNFIKKSNKKITTDQELEAQGYTLHVKEGREEEEEETASEEEDEHAEPKKKTMNVFEYIHNGGGRVNLFPSRRRGRGGAGPTGSREFRGGRGRGRGGSFVKSRDAPDIQDERAFPTLGGR	0	142.95	54	23	72	23	372	40.7	6.16	232.52	23	0.945	0.949	0.951	1.066	1.008	1.011	1.014	1.037	1.02	1.022	-0.08	-0.08	-0.07	0.09	0.01	0.02	0.02	0.05	0.03	0.03	0.0947569	0.467297	0.449927	0.135707	0.785048	0.792732	0.715811	0.325986	0.591098	0.570727	0.889498	0.902448	0.922119
FALSE	High	Master Protein	TGGT1_277270-t26_1-p1	transcript=TGGT1_277270-t26_1 | gene=TGGT1_277270 | organism=Toxoplasma_gondii_GT1 | gene_product=NTPase II [Source:UniProtKB/TrEMBL;Acc:S7UGK0] | transcript_product=NTPase II | location=AAQM03000418:1-4939(+) | protein_length=862 | sequence_SO=contig | SO=protein_coding_gene | is_pseudo=false	LLFQYVPQMHEGAKKLMQLLEEDTVAILDSQLNEKQKVQVKALGIPVMLCSTAGVRDFHEWYRDALFVLLRHLINNPSPAHGYKFFTNPFWTRPITGAEEGLFAFITLNHLSRRLGEDPARCMIDEYGVKQCRNDLAGVVEVGGASAQIVFPLQEGTVLPSSVRAVNLQRERLLPERYPSADVVSVSFMQLGMASSAGLFLKELCSNDEFLQGGICSNPCLFKGFQQSCSAGEVEVRPDGSASVNEDVRKNRLKPLATYCSVNNPEISFKVTNEMQCRENSIDPTKPLAERMKIENCSIIKGTGNFDKCVSQVESILVAPKLPLPANIEAASSGFESVDQVFRFASSTAPMIVTGGGMLAAINTLKDHRLLRSDFSGDVEELAEAAREFCSSEVIIRTD…	0	142.819	50	24	122	9	862	95.7	6.74	326.27	24	1.37	1.475	1.405	0.742	1.016	1.094	1.042	0.991	0.983	0.974	0.45	0.56	0.49	-0.43	0.02	0.13	0.06	-0.01	-0.02	-0.04	0.51545	0.46927	0.553674	0.632048	0.919697	0.549271	0.589128	0.316666	0.688409	0.411086	0.889498	0.902448	0.922119
FALSE	High	Master Protein	TGGT1_214090-t26_1-p1	transcript=TGGT1_214090-t26_1 | gene=TGGT1_214090 | organism=Toxoplasma_gondii_GT1 | gene_product=Signal peptidase [Source:UniProtKB/TrEMBL;Acc:S7W5I3] | transcript_product=signal peptidase | location=TGGT1_chrX:5908335-5920860(+) | protein_length=1859 | sequence_SO=chromosome | SO=protein_coding_gene | is_pseudo=false	MAPTKQRVGALDVRALVASVRPSIVGLRVTNVYDFSAGGSRGGTSSSYILKFAGKESKVFLFIHAGFRLYTTEWKKDKGALPSPFCVRLRKGLRGKKLEDIHQHGADRVVILTFGKSENALHLVVELYVSGNIILTDHTNLIQAVLRRHTLSAPAGAAPAEGGREARQETEQRIAVNEYYRLDPPEMSLLRDAIRPIDFSADVVKRQLTAIQEAACGKDTKSKTQVTWAQALGRLAPFVSPALAVHALLATTGDESAKKRVLTQDGLDEAVESLRRAVMECLRMLRAVSSAEDFLGAGPLPAELESQASATPPVEGYIVATRRSASSAEEKSLSFSLLYDYEEFSPVVLRQFADLQVLPSPQDIQREREERAAVAVQRLQVDRNTNSQKEADEKEEEEE…	0	142.658	24	37	62	37	1859	203.4	5.82	163.02	37	0.922	0.93	0.965	1.066	0.982	0.992	1.029	0.989	1.005	0.977	-0.12	-0.1	-0.05	0.09	-0.03	-0.01	0.04	-0.02	0.01	-0.03	0.390501	0.494604	0.635333	0.481912	0.103957	0.577037	0.128788	0.670612	0.765475	0.287074	0.889498	0.902448	0.922119
FALSE	High	Master Protein	P12111	Collagen alpha-3(VI) chain OS=Homo sapiens (Human) OX=9606 GN=COL6A3 PE=1 SV=5	MRKHRHLPLVAVFCLFLSGFPTTHAQQQQADVKNGAAADIIFLVDSSWTIGEEHFQLVREFLYDVVKSLAVGENDFHFALVQFNGNPHTEFLLNTYRTKQEVLSHISNMSYIGGTNQTGKGLEYIMQSHLTKAAGSRAGDGVPQVIVVLTDGHSKDGLALPSAELKSADVNVFAIGVEDADEGALKEIASEPLNMHMFNLENFTSLHDIVGNLVSCVHSSVSPERAGDTETLKDITAQDSADIIFLIDGSNNTGSVNFAVILDFLVNLLEKLPIGTQQIRVGVVQFSDEPRTMFSLDTYSTKAQVLGAVKALGFAGGELANIGLALDFVVENHFTRAGGSRVEEGVPQVLVLISAGPSSDEIRYGVVALKQASVFSFGLGAQAASRAELQHIATDDNLV…	0	141.398	15	43	59	43	3177	343.5	6.68	138.39	43	0.865	0.895	0.933	1.115	0.964	0.998	1.04	1.019	1.047	1.031	-0.21	-0.16	-0.1	0.16	-0.05	0	0.06	0.03	0.07	0.04	0.49014	0.615505	0.732705	0.675698	0.616969	0.956463	0.495504	0.533881	0.16097	0.215842	0.889498	0.902448	0.923577
FALSE	High	Master Protein	TGGT1_314410-t26_1-p1	transcript=TGGT1_314410-t26_1 | gene=TGGT1_314410 | organism=Toxoplasma_gondii_GT1 | gene_product=AAA domain-containing protein [Source:UniProtKB/TrEMBL;Acc:S7W963] | transcript_product=putative aquarius | location=TGGT1_chrXI:4032614-4045800(+) | protein_length=2247 | sequence_SO=chromosome | SO=protein_coding_gene | is_pseudo=false	MCAYGRRPPPPPPDGGRPATVGPAGPQILRVGASPPASSAPPPPPSACSHRPLVLRRVAPRPPSAPSPPVTANAASLLASSSCGEQAGSPLEKSERRERGARGEKDERGALRDLPSSRRQGVSHTFSKLGQSRWKRPPLVHPDAVGFFREQLAEQERLLKAAEATASELEKKAAHASDAADAAEGGAGKKGRHSVEKQLRLANKRVEAAKKRFEDARETLEAIAQVESAPNEDAEESEKSEGRGVRRQQEGFDPSLVTQIYDDLVDAHFPQQGLLTLEFSLFFENYLWPFFPVHGAETPADADSAEPTVSKAHLLLIVCMLLEKHRKNLPLWESFLNHPLLRDSDGRRTEAREETGGKKETGGEDVEMDGGASQERRNGERDAVAAELSADNMVRLPDE…	0	141.313	19	35	63	35	2247	250.5	6.21	172.08	35	0.999	0.97	0.973	1.036	1.035	1.005	1.009	1	1.007	0.966	0	-0.04	-0.04	0.05	0.05	0.01	0.01	0	0.01	-0.05	0.99381	0.572305	0.735562	0.785021	0.347885	0.947387	0.866238	0.999015	0.901721	0.727064	0.996176	0.902448	0.924385
FALSE	High	Master Protein	TGGT1_291140-t26_1-p1	transcript=TGGT1_291140-t26_1 | gene=TGGT1_291140 | organism=Toxoplasma_gondii_GT1 | gene_product=CCR4-Not complex component, Not1 protein [Source:UniProtKB/TrEMBL;Acc:S7UQ42] | transcript_product=CCR4-Not complex component, Not1 protein | location=TGGT1_chrIX:3957969-3969206(+) | protein_length=2562 | sequence_SO=chromosome | SO=protein_coding_gene | is_pseudo=false	MGDPGGGDSVFPSLKATGSSATGPSTGTSSHSGAGGSTSGNAVSASATSFAGSSTGTGASLGSGSATNNNSGLGTEHNAQNGEEGTSGKAPMTGSPTAGGVSCSAASAGEADGVSLRGPPAQAASASGNENGAKNGPPGGGAAGAPVSQAQQLLAVAGKPAQDFEAEVNSCFQKMYSGIYSVDMVVALLQRLSQAPPGSRDSSLFVSMIRTLFFECRHFPKYPPHELALTAELFGQLIHRHVLINSGNSLMIALRCVLEAIRKGPTSKMFVFGIAALEQFLDRIFLFPQFLVALASLSELQQQHPHYTHYAQSVLLLIPEKYHSLVVLDPRIAASLPPMPDLPPVVGVAAAARQAAGTGIGEVTQTSEPPSGSSISTMLPPPHGLQHPVTASIQQQLAA…	0	141.289	17	39	69	39	2562	265.7	7.33	155.22	39	1.024	1.025	1.053	0.95	0.973	0.974	1	0.968	0.98	0.95	0.03	0.04	0.07	-0.07	-0.04	-0.04	0	-0.05	-0.03	-0.07	0.467949	0.685823	0.475691	0.341453	0.200996	0.350119	0.989509	0.159996	0.302303	0.0901916	0.889498	0.902448	0.922119
FALSE	High	Master Protein	TGGT1_308090-t26_1-p1	transcript=TGGT1_308090-t26_1 | gene=TGGT1_308090 | organism=Toxoplasma_gondii_GT1 | gene_product=Protein kinase domain-containing protein [Source:UniProtKB/TrEMBL;Acc:A0A125YX85] | transcript_product=rhoptry protein ROP5 | location=AAQM03000031:206-1855(-) | protein_length=549 | sequence_SO=contig | SO=protein_coding_gene | is_pseudo=false	MATKLARLATWLVLVGCLLWRAGAVQLSPPNSRTNDLASGTPHVARGDTEAQSGTGDDSDFPQAVAEEVADMSGGRVPRVPASSTTTSASEGIFRRLVRRLRRGRGTADGAGVADETHQEPRPPLRKRLAQHFRRLRGFFGRLTPRWLSGLGRRAQRWWRGRQRPLLDPSFHGLEAGDSFMRDLLKREEELIGYCREEALKEPAAMVEAVTATVWPQNAETTVDSLLSQGERKLKLVEPLRVGDRSVVFLVRDVERLEDFALKVFTMGAENSRSELERLHEATFAAARLLGESPEEARDRRRLLLPSDAVAVQSQPPFAQLSPGQSDYAVANYLLLMPAASVDLELLFRTLDFLYVLRSTEDFLALHILTAQLIRLAANLQSKGLVHGHFTPDNLFIMP…	0	140.791	40	17	164	9	549	60.7	9.25	450.87	17	1.033	1.023	1.006	0.958	0.99	0.98	0.964	0.979	0.994	0.929	0.05	0.03	0.01	-0.06	-0.01	-0.03	-0.05	-0.03	-0.01	-0.11	0.642669	0.652369	0.919996	0.27612	0.804372	0.459538	0.448059	0.56939	0.872402	0.486362	0.889498	0.902448	0.970413
FALSE	High	Master Protein	TGGT1_240650-t26_1-p1	transcript=TGGT1_240650-t26_1 | gene=TGGT1_240650 | organism=Toxoplasma_gondii_GT1 | gene_product=WD_REPEATS_REGION domain-containing protein [Source:UniProtKB/TrEMBL;Acc:A0A125YGM0] | transcript_product=putative coatomer protein complex, subunit alpha | location=TGGT1_chrVI:1326973-1343296(-) | protein_length=1300 | sequence_SO=chromosome | SO=protein_coding_gene | is_pseudo=false	MSKMFVKCETKSSRVKGLAFHPSLQWILAALHNGTIQLWDYRIGSLIDKFEEHEGPVRGIDFHSSQPLFVSGGDDYKVKLWSLTTRKCIFTFLGHLDYLRTVFFHHIYPWVLSASDDQTVRIWNWQSRACIAVLTGHNHYVMSALFHPFEDLVVSASLDQTIRVWDTSGLREKTGGAGGAHALGTGSFSAPGTSRPHAEMFTANDAVCKFVLEGHERGVNWAAFHPSLPLIASAADDRLIKLWRYNDSKAWEVDTLRGHFNNVSCLVFHPQRELLISNSEDRTIRVWDVSKRIGVHTFRRENDRFWIIAAHRSSSALAVGHDSGMVVFKLHTERPPSALHSRFHFYYVRDRVLCFRDLLLSLQLFQKSGEGGRNAAGAHAVAEVSICEVRRPANAMTAG…	0	140.514	29	36	80	36	1300	142.9	7.25	200.4	36	0.975	0.967	0.983	1.024	0.998	0.99	1.007	0.997	0.975	1.003	-0.04	-0.05	-0.03	0.03	0	-0.01	0.01	0	-0.04	0	0.639023	0.58039	0.777394	0.683208	0.759719	0.0508646	0.301653	0.375032	0.220355	0.876297	0.889498	0.902448	0.930059
FALSE	High	Master Protein	TGGT1_205010-t26_1-p1	transcript=TGGT1_205010-t26_1 | gene=TGGT1_205010 | organism=Toxoplasma_gondii_GT1 | gene_product=SF3b1 domain-containing protein [Source:UniProtKB/TrEMBL;Acc:S7UUF2] | transcript_product=putative U2 small nuclear ribonucleoprotein family protein | location=TGGT1_chrVIIa:1582142-1590578(-) | protein_length=1386 | sequence_SO=chromosome | SO=protein_coding_gene | is_pseudo=false	MENNGSSGKNQPSSTAAATDSAGVAFDSHIYGETPAAHYVTEIDAETPLVAQDGGSGSAVSRASRSGQRSTEDGARIAERERMLMAQQGDGVEATGVDKSIAAREDFYRRQRFQRALSPERADPFSDGDLGAASRGESARTYADVMLEQHLDREKQAAVRQIRKLQEDAELQRQLQMQKQLGGGDGSEKKRRRWDWGTAGAEDEGLTEAERQELARAKAQGGGKSEEGAAAAAAALVSRWDTPLQAGGQTPGAWGETPLVAGSDSREGAGARTGLGAAPGKKKSRWDATPTIGGTGQETPTPGQWGATPAVDQAGTPILAGAGSVTPMAPGAGSGNVTPMIAPGSQTPSMGRKRSRWDATPVLGGSDADMAAAAAAGLTPGASTPMTGGAGMTPGKDGS…	0	140.004	25	31	55	30	1386	150.7	5.95	156.32	31	1.064	1.096	1.044	0.934	0.994	1.024	0.975	1	0.988	0.989	0.09	0.13	0.06	-0.1	-0.01	0.03	-0.04	0	-0.02	-0.02	0.0111289	0.166408	0.0108548	0.0925141	0.693177	0.351088	0.255881	0.993034	0.856599	0.0729683	0.889498	0.902448	0.922119
FALSE	High	Master Protein	TGGT1_232250-t26_1-p1	transcript=TGGT1_232250-t26_1 | gene=TGGT1_232250 | organism=Toxoplasma_gondii_GT1 | gene_product=Catalase [Source:UniProtKB/TrEMBL;Acc:S7V3B9] | transcript_product=catalase | location=TGGT1_chrVIII:1969434-1975537(-) | protein_length=502 | sequence_SO=chromosome | SO=protein_coding_gene | is_pseudo=false	MTQVPPVTFQQYGPVITTSAGNPVDDNQNSVTAGPYGPAILSNFHLIDKLAHFDRERIPERVVHAKGGGAFGYFEVTHDITRFCKAKLFEKIGKRTPVFARFSTVAGESGSADTRRDPRGFALKFYTEEGNWDMVGNNTPIFFVRDAIKFPDFIHTQKRHPQTHLHDPNMVWDFFSLVPESVHQVTFLYTDRGTPDGFRHMNGYGSHTFKFINKDNEAFYVKWHFKTNQGIKNLNRQRAKELESEDPDYAVRDLFNAIAKREFPSWTFCIQVMPLKDAETYKWNVFDVTKVWPHGDYPLIPVGKLVLDRNPENYFQDVEQAAFAPAHMVPGIEPSEDRMLQGRMFSYIDTHRHRLGANYHQIPVNRPWNARGGDYSVRDGPMCVDGNKGSQLNYEPNSV…	0	139.651	47	20	85	20	502	57.2	7.2	255.67	20	0.887	0.901	0.894	1.109	0.984	1	0.991	1.02	1.007	0.981	-0.17	-0.15	-0.16	0.15	-0.02	0	-0.01	0.03	0.01	-0.03	0.297368	0.388756	0.254565	0.405913	0.509533	0.993473	0.819288	0.331289	0.221241	0.626519	0.889498	0.902448	0.922119
FALSE	High	Master Protein	TGGT1_268950-t26_1-p1	transcript=TGGT1_268950-t26_1 | gene=TGGT1_268950 | organism=Toxoplasma_gondii_GT1 | gene_product=HTH La-type RNA-binding domain-containing protein [Source:UniProtKB/TrEMBL;Acc:S7V5D6] | transcript_product=hypothetical protein | location=TGGT1_chrVIII:6183799-6188591(-) | protein_length=543 | sequence_SO=chromosome | SO=protein_coding_gene | is_pseudo=false	MATPEANAAAAAAPVEQNAVGSADQGKDSQPEMTPEKHEGKNVCNEEKELSRKRKRGGHEDSFFPKKREEMTPEQLKQRIKRQVEYYLSDESLAYDAFFQSKMREAAQQGKGESLDLRFVLSSPRIKSLNLTKAEILAAIADSVAVKVKEEADGTTLLYRETPLPELQERPQRTACARREDGSGGASRLPQGVGRDPHAAGVFLKLCDIPESVQQWQQVKDAIKETLPGEVFVKFVSKIEEVSVSADKKTRRCWVYLGSFEDDRETLQKMQPIKIPLGDGEAEAYILTDQEVRLCVQDLPPRIRTAREKDLQTLRRQLAALPLSLGGIPFKSVEHLRMCMAEFLQKTPVDQALKPNSAAEKAVKGLLDYHPKAYIKKGGRDREVVGIKVGLHDKRDSQS…	0	138.588	54	28	78	28	543	60.2	6.7	182.88	28	1.06	1.06	1.039	0.947	1.005	1.004	0.984	1.027	1.017	1.009	0.08	0.08	0.05	-0.08	0.01	0.01	-0.02	0.04	0.02	0.01	0.495976	0.441406	0.679667	0.551043	0.572044	0.841352	0.203106	0.0503123	0.351607	0.848778	0.889498	0.902448	0.922119
FALSE	High	Master Protein	TGGT1_279420-t26_1-p1	transcript=TGGT1_279420-t26_1 | gene=TGGT1_279420 | organism=Toxoplasma_gondii_GT1 | gene_product=hypothetical protein | transcript_product=hypothetical protein | location=TGGT1_chrIX:26421-30410(+) | protein_length=1329 | sequence_SO=chromosome | SO=protein_coding_gene | is_pseudo=false	MSMSSLQLASADARMGKEDRATTVPGPGISRLSLRQCVCSLLLSVCTLGIPIKSAILGVASFSGSDVSRFYVPHIGGVGARSVSLTEDEYLPEQINFPPAAEEARDGVFSQWRGVRRGVAVQRHEHFDGSAINSHEEDADVSLEQLMNDLGVGEDDVEERVSSWQGTSHSRSGADVTMNAFGFSELKSTKSSTAPSDSVKAAATRLNPSDSKYREQRVMDLLEQLETLTRQTPVAGEDDQFVDFSFEPDSVTTSDINESPSSVEGRRDVSQAYGDIRPKSATTLFRDTEAGISMTDVSGDDDSSARHGDKGDSSNEQAIEPPSANEAAESDSSHDSTDVADGPAEAGTEDPSGGSPHSPESEPGNAVAEESLTSMERNEKDTAAQPISTEPVAEQPDVE…	0	138.574	27	30	75	30	1329	144.9	5.2	228.7	30	1.026	1.029	1.026	0.964	0.989	0.992	0.989	1.007	0.99	0.997	0.04	0.04	0.04	-0.05	-0.02	-0.01	-0.02	0.01	-0.01	0	0.733194	0.60636	0.622823	0.603891	0.299146	0.594881	0.551226	0.669638	0.2247	0.872705	0.894792	0.902448	0.922119
FALSE	High	Master Protein	TGGT1_229990-t26_1-p1	transcript=TGGT1_229990-t26_1 | gene=TGGT1_229990 | organism=Toxoplasma_gondii_GT1 | gene_product=Putative T-complex protein 1 subunit alpha [Source:UniProtKB/TrEMBL;Acc:A0A125YJ01] | transcript_product=putative T-complex protein 1 subunit alpha | location=TGGT1_chrVIII:493249-499968(-) | protein_length=548 | sequence_SO=chromosome | SO=protein_coding_gene | is_pseudo=false	MALAIFGDRQSGQDVRTANAAAVQSIANILRSSLGPQGLDKMLVDDIGDMTITNDGATILKQLEVQHPAAKVLVELSDLQDKEVGDGTTSVVLLAAEFLRVGNQLVKEGVHPTAVIAGFKLAMKESVKFIQEHLTSRVDANNREVLMNVATTTISSKLIGTETAHFADLVVRAILSVKMITERGDVKYPVSSINIIKTHGKSMRESSLVEGYALKAGRAAQGMPQCVKNAKVALLDFNLRQHRMQLGVQIQVDNPEELEKIRQKEKDITAAKIQKILASGANVILTTQGIDDMAMKYFVEAGAIAVRRVDRKDLRRIAKITEGTVVLTMATLDGDEKFDASCLGTCEEVYEERIGDWDHLMFKGCKGGKAATVILRGANEYMLDEVDRSVHDALCAVSR…	0	138.537	50	23	62	23	548	59.2	6.25	187.29	23	0.947	0.973	0.957	1.046	0.991	1.018	1.001	1	0.992	0.983	-0.08	-0.04	-0.06	0.07	-0.01	0.03	0	0	-0.01	-0.02	0.474405	0.664465	0.510219	0.47756	0.458762	0.188234	0.757903	0.851284	0.683727	0.680994	0.889498	0.902448	0.922119
FALSE	High	Master Protein	TGGT1_229010-t26_1-p1	transcript=TGGT1_229010-t26_1 | gene=TGGT1_229010 | organism=Toxoplasma_gondii_GT1 | gene_product=Rhoptry neck protein RON4 [Source:UniProtKB/TrEMBL;Acc:S7WIC1] | transcript_product=rhoptry neck protein RON4 | location=TGGT1_chrVIII:18238-24970(+) | protein_length=984 | sequence_SO=chromosome | SO=protein_coding_gene | is_pseudo=false	MAIKNTLTGSGLLVLLTLACGTTVQSSPPTPAPRMYPNMNERPLSAESRLTPGIYRSELHIDLKSPQKTASQSSLAPTGDNNSKVESIIAGSDTTPRSAEGTSESPPVPQLGTPPRPAPRRSKGEGESQPPTAAPRTSRSVDTGSGSDASTEQQAGEQKVVTPIPASKGIYPNLDELRRSQESNVDAGSGTSTNEGGGTSEGPQVPQPGTPPRTGRRRAKARNRKRHPTPASRESSSEDENQPPTTASRPSNGEGESQPPTAAPRTSRSVDTGSGSDASTEQQAGEQKVVTPIPASKGIYPNLDELRQTQEGEESASQPADVTWFSMSVPMGVVDRRVSRALKEQFFQFLQHLSADYPKQVQTVYEFLGWVADKLPENEEEVQMFIDALNTTEAMVGKA…	0	138.487	41	26	59	26	984	107.3	6.46	176.36	26	1.159	1.154	1.139	0.875	1.014	1.01	0.997	1.019	1.006	0.994	0.21	0.21	0.19	-0.19	0.02	0.01	0	0.03	0.01	-0.01	0.483748	0.501404	0.545382	0.531817	0.293479	0.221849	0.453453	0.433766	0.385574	0.801259	0.889498	0.902448	0.922119
FALSE	High	Master Protein	TGGT1_221870-t26_1-p1	transcript=TGGT1_221870-t26_1 | gene=TGGT1_221870 | organism=Toxoplasma_gondii_GT1 | gene_product=hypothetical protein | transcript_product=hypothetical protein | location=TGGT1_chrII:627827-634682(+) | protein_length=1373 | sequence_SO=chromosome | SO=protein_coding_gene | is_pseudo=false	MDTRDGESSPWRREKTRPPAPAASLSCAAFLSLLTGRKNSAVSPSSSSLLASTSSPGVQTHCRAAAFSRRMRWLLVCLVLAHLCSENTQSLRDLSPGASPGKASLSPSLLAAAAGKLDISPPKPQGNPVQMGAPTHPLFGAGKQGKDLPPAVADSPPPPAPPVLPPVSPEASDAAADVQRRVPGSVGESPGGEEQGEAQRDTGHHSGDDTNETAKMEETVSPDPVHNKERRDSGSPETAGEGENVPVSGKSAIEGEHKEEAPSQGLSPESDRASDTHAAGDRNLAPAPPASEKEATDDAVTRHAEKRGVDTPPQTQEGDASQAEESRAEDNKVPAPSGQSERVSDSRRRVQRVAGNGASPSSSNGEAAEGNGSPPAAAVPADARIGRSEQVRPAGAPPH…	0	137.525	26	28	47	28	1373	144	5.91	119.8	28	0.943	0.927	0.942	1.095	1.032	1.015	1.031	1.024	1.034	1.01	-0.08	-0.11	-0.09	0.13	0.05	0.02	0.04	0.03	0.05	0.01	0.497656	0.374618	0.417015	0.300699	0.230346	0.172144	0.00820511	0.540545	0.195324	0.271453	0.889498	0.902448	0.922119
FALSE	High	Master Protein	TGGT1_205320-t26_1-p1	transcript=TGGT1_205320-t26_1 | gene=TGGT1_205320 | organism=Toxoplasma_gondii_GT1 | gene_product=hypothetical protein | transcript_product=hypothetical protein | location=TGGT1_chrVIIa:1385667-1389087(+) | protein_length=739 | sequence_SO=chromosome | SO=protein_coding_gene | is_pseudo=false	MAATVLATETQPRSTSEVSTEGEALPGARMAAVVSEESSQKVLREDDAGPSDSAPAVAWDKSEELKIEDNSEATSPQEGKGSEHEGGADAPASEAEAKGVKGGKIGAGRDEAGSSTERRKETHRDKETESATDAGTTVAPSDTQSNAHVPEKRNDLGADKREESSAGATVVTPEVGEPSGTKVDISRETCQKPVGSQVASDSLDTKSREAGDEERGSSQEQQRRKVSPLKDAETQEAPADSQRTTNPHSPSLDLRGEVEITESGETAEADQDTDIRAATEATDKSRATSSGEKTTAATGEKKLRRKKKEKKTVFESIPEPSKAHTGCRAPPLARKDSQTVFVSEPVSQSVAHFRACEKAPEKQHLQTVFESQRAEKSTAHARAGEKLADRKDGQTVFES…	0	137.078	50	25	69	25	739	80	5.48	186.51	25	1.045	1.026	1.069	0.96	1.003	0.985	1.026	1.005	0.98	0.987	0.06	0.04	0.1	-0.06	0	-0.02	0.04	0.01	-0.03	-0.02	0.550539	0.688185	0.528157	0.627876	0.835954	0.470608	0.249545	0.865724	0.213123	0.0859157	0.889498	0.902684	0.922119
FALSE	High	Master Protein	TGGT1_201780-t26_1-p1	transcript=TGGT1_201780-t26_1 | gene=TGGT1_201780 | organism=Toxoplasma_gondii_GT1 | gene_product=VWFA domain-containing protein [Source:UniProtKB/TrEMBL;Acc:A0A125YK19] | transcript_product=microneme protein MIC2 | location=TGGT1_chrVIIa:3693727-3696991(-) | protein_length=769 | sequence_SO=chromosome | SO=protein_coding_gene | is_pseudo=false	MRLQREAVFGLMFACGMWMWPSEVAGGGWSIVDALRKRYDTSRGGDANGVDTSGVEDVIQSDSAIGAAEGCTNQLDICFLIDSSGSIGIQNFRLVKQFLHTFLMVLPIGPEEVNNAVVTYSTDVHLQWDLQSPNAVDKQLAAHAVLEMPYKKGSTNTSDGLKACKQILFTGSRPGREHVPKLVIGMTDGESDSDFRTVRAAKEIRELGGIVTVLAVGHYVKHSECRSMCGCSGTSDDDSPCPLYLRADWGQLATAIKPMLKEVCKTLPQDAICSDWSAWSPCSVSCGDGSQIRTRTEVSAPQPGTPTCPDCPAPMGRTCVEQGGLEEIRECSAGVCAVDAGCGVWGEWSAWSASCGNATRKRERTRYNDPPPQGAGRRCENQDPPVLQEQTEEATLAPC…	0	137.052	28	17	109	17	769	82.6	4.83	353.26	17	1.117	1.112	1.114	0.943	1.053	1.049	1.051	1	1.012	0.996	0.16	0.15	0.16	-0.08	0.07	0.07	0.07	0	0.02	-0.01	0.510812	0.558935	0.578499	0.814686	0.64268	0.61207	0.549213	0.989312	0.0303294	0.692071	0.889498	0.902448	0.922119
FALSE	High	Master Protein	Q9NZM1	Myoferlin OS=Homo sapiens (Human) OX=9606 GN=MYOF PE=1 SV=1	MLRVIVESASNIPKTKFGKPDPIVSVIFKDEKKKTKKVDNELNPVWNEILEFDLRGIPLDFSSSLGIIVKDFETIGQNKLIGTATVALKDLTGDQSRSLPYKLISLLNEKGQDTGATIDLVIGYDPPSAPHPNDLSGPSVPGMGGDGEEDEGDEDRLDNAVRGPGPKGPVGTVSEAQLARRLTKVKNSRRMLSNKPQDFQIRVRVIEGRQLSGNNIRPVVKVHVCGQTHRTRIKRGNNPFFDELFFYNVNMTPSELMDEIISIRVYNSHSLRADCLMGEFKIDVGFVYDEPGHAVMRKWLLLNDPEDTSSGSKGYMKVSMFVLGTGDEPPPERRDRDNDSDDVESNLLLPAGIALRWVTFLLKIYRAEDIPQMDDAFSQTVKEIFGGNADKKNLVDPFV…	0	136.588	23	42	69	42	2061	234.6	6.18	136.68	42	0.91	0.914	0.929	1.08	0.984	0.987	1.004	0.972	1.006	1.007	-0.14	-0.13	-0.11	0.11	-0.02	-0.02	0.01	-0.04	0.01	0.01	0.617463	0.596798	0.650251	0.566676	0.758099	0.720437	0.907679	0.550086	0.936599	0.935723	0.889498	0.902448	0.922119
FALSE	High	Master Protein	TGGT1_230960-t26_1-p1	transcript=TGGT1_230960-t26_1 | gene=TGGT1_230960 | organism=Toxoplasma_gondii_GT1 | gene_product=CPSF_A domain-containing protein [Source:UniProtKB/TrEMBL;Acc:A0A125YIG2] | transcript_product=putative splicing factor 3b, subunit 3 | location=TGGT1_chrVIII:1132596-1143754(-) | protein_length=1233 | sequence_SO=chromosome | SO=protein_coding_gene | is_pseudo=false	MPVLYHLTLQKPTAIVHALQGNFSAPRAQEVVVSRGRVLELLRPDDQGKLQAISSTEVFGIIRSIAAFRLTGANRDYLAIGSDSGRLAIVQFSAEKNEFERVHCETYGKTGIRRVVPGEYLAVDPKGRTLMVAAVERQKFVYIVNRDNKAQLTISSPLEAHKSHAICHDLCGVDMGFDNPLFASLEQNVESSDRKPATPGVTVPKGLCLWEMDLGLNHVIKKATLPVPASAHCLIPVPGGGGADGPSGLLVCCGNFLLYKKPDHEEICCAIPRRLETGSDRGLAVVAFAVHRMKDFFFILIQTEYGDIYKVEISHEEGVVREVVCRYFDTVPVANALCVLKSGYLFVASEFGNHLFYQFTGIGSDASDPRCSSTHPLGREAIIAFKPRPLRNLALVDEL…	0	136.096	27	27	64	27	1233	135.7	6.6	184.31	27	1.021	1.044	1.046	0.962	0.983	1.004	1.006	0.989	0.991	1.008	0.03	0.06	0.06	-0.06	-0.03	0.01	0.01	-0.02	-0.01	0.01	0.422405	0.187867	0.458939	0.374724	0.310492	0.788574	0.733075	0.239058	0.486614	0.75359	0.889498	0.902448	0.922119
FALSE	High	Master Protein	TGGT1_313370-t26_1-p1	transcript=TGGT1_313370-t26_1 | gene=TGGT1_313370 | organism=Toxoplasma_gondii_GT1 | gene_product=hypothetical protein | transcript_product=hypothetical protein | location=TGGT1_chrXI:3281764-3287206(+) | protein_length=1687 | sequence_SO=chromosome | SO=protein_coding_gene | is_pseudo=false	MSANPCPLPAPSVLFGRHSRFSSALRFDRSSVNGASSLVADGSRSRGAGTQQHVSMHVSLQRKNLRDADIREFVQWLAASLQQQLRQFPPVGRSAPLLPGGVGAGAGPSVSASAPAVSGAKPASGAAKSEPAESEGEWPGAGEAPTGEALSPFLFTCCLDVSENLITAEGLSHLLGFFQAHPGSFRLAKLKLYKNRLGDAGARVLAAFIQPSLLPTTSSSSSLRRSGARAGKPSPSPPPALEELHLSHCDITAKGCLSLLDAVAAVVDDKGRYLYPRYDQVRRCLVPLWLRLEYNHINDPLGLLKQWSANLKDKRPLPSTGAGASASAGGAPLSFACFAEKLPLSSSGGRAASALGTSADGSAYFHCTPARCCRATSTFAPIFHVYMVTHQSSGVAPTP…	0	135.957	26	31	49	31	1687	174.5	7.69	132.85	31	0.919	0.911	0.945	1.087	0.999	0.99	1.027	1.005	0.97	0.937	-0.12	-0.13	-0.08	0.12	0	-0.01	0.04	0.01	-0.04	-0.09	0.405893	0.327231	0.553042	0.424084	0.752536	0.582844	0.0481097	0.809967	0.26627	0.492871	0.889498	0.902448	0.922119
FALSE	High	Master Protein	TGGT1_219700-t26_1-p1	transcript=TGGT1_219700-t26_1 | gene=TGGT1_219700 | organism=Toxoplasma_gondii_GT1 | gene_product=MCM domain-containing protein [Source:UniProtKB/TrEMBL;Acc:S7V296] | transcript_product=putative DNA replication licensing factor MCM4 | location=TGGT1_chrXII:651605-660187(+) | protein_length=1014 | sequence_SO=chromosome | SO=protein_coding_gene | is_pseudo=false	MASPLRSRVSGPPDEHEVNAEDMEMQDEVTPLRGYAAQTEGGDEGRVSNFPGAESQGGRENMEAEHDTQGAEDNFQRSSPLSRRRRPVTQREAFPHGFSQHLSENAPQMSAATHRGLESSASEYGGTPLAVRRVRFARADLGDMGREFLLQDSDMQRLPELPKEVVDSNMERKFNEFFETFRVEDTEGILELSEEEKAISALANDAAYADAGCRSFYAIKLLQYMERRGAALMAGHSSQTGLSFDVSLQHLFLFDRQLYDAAVNAPQDAIAAFDAILRRKFADLRELHGCFSDEGAGHLGAEEVLLQQAPRLRLFSKPPALMDSARSLDPSVDLDRLVCLKGIVVRTSEVLPEMTMAAFRCQGQKRVDVNEYTACLQEVYECVVNGEALEPKKCQACGG…	0	135.488	31	26	66	25	1014	111.9	5.82	179.89	26	1.012	1.004	1.01	1.036	1.048	1.039	1.046	1.005	0.98	0.984	0.02	0.01	0.01	0.05	0.07	0.06	0.07	0.01	-0.03	-0.02	0.194113	0.806048	0.426239	0.0662629	0.00230115	0.131476	0.0612574	0.655326	0.0359661	0.247288	0.889498	0.924623	0.922119
FALSE	High	Master Protein	TGGT1_291890-t26_1-p1	transcript=TGGT1_291890-t26_1 | gene=TGGT1_291890 | organism=Toxoplasma_gondii_GT1 | gene_product=TgMIC1 domain-containing protein [Source:UniProtKB/TrEMBL;Acc:S7VXI3] | transcript_product=microneme protein MIC1 | location=TGGT1_chrIX:4200849-4203191(-) | protein_length=456 | sequence_SO=chromosome | SO=protein_coding_gene | is_pseudo=false	MGQALFLTVLLPVLFGVGPEAYGEASHSHSPASGRYIQQMLDQRCQEIAAELCQSGLRKMCVPSSRIVARNAVGITHQNTLQWRCFDTASLLESNQENNGVNCVDDCGHTIPCPGGVHRQNSNHATRHEILSKLVEEGVQRFCSPYQASANKYCNDKFPGTIARRSKGFGNNVEVAWRCYEKASLLYSVYAECASNCGTTWYCPGGRRGTSTELDKRHYTEEEGIRQAIGSVDSPCSEVEVCLPKDENPPLCLDESGQISRTGGGPPSQPPEMQQPADRSDERGGGKEQSPGGEAQPDHPTKGGNIDLPEKSTSPEKTPKTEIHGDSTKATLEEGQQLTLTFISTKLDVAVGSCHSLVANFLDGFLKFQTGSNSAFDVVEVEEPAGPAVLTIGLGHKGR…	0	134.881	46	18	147	18	456	48.6	5.34	444.13	18	1.129	1.157	1.145	0.884	0.998	1.023	1.012	0.986	0.983	0.974	0.18	0.21	0.2	-0.18	0	0.03	0.02	-0.02	-0.02	-0.04	0.461492	0.446603	0.51913	0.592323	0.97741	0.683575	0.687581	0.140223	0.538501	0.43492	0.889498	0.902448	0.922119
FALSE	High	Master Protein	TGGT1_229180-t26_1-p1	transcript=TGGT1_229180-t26_1 | gene=TGGT1_229180 | organism=Toxoplasma_gondii_GT1 | gene_product=Importin N-terminal domain-containing protein [Source:UniProtKB/TrEMBL;Acc:S7V226] | transcript_product=HEAT repeat-containing protein | location=TGGT1_chrVIII:71618-81573(-) | protein_length=1238 | sequence_SO=chromosome | SO=protein_coding_gene | is_pseudo=false	MDLEAFVSLLRAVISPDPALRKEAERQIKEGKEKQPAALVSLVLQTVQTHSDDEVRLQAAVLFRSFFRGVIDSEGHVWRQLGDAERTQVKQILLHCLDTEKNKLVRNNICDTISDLASDLIPVDQWNDLGQVLLAMIQSGVPVKQQTGLKILSEIAPVLTEQLAAAAPLVCRIISACMASGQDVNTRVEAFALLVAVVEDMNKRVYKKFLPDAKTRAAPECPSVQLLVIDTLEATLRAGAEDDYALAERMMVSVIQLCEAEQGGGVSLLRPHLSQFCDYLLAISLIGQGQREAAEAAAAAGAAAAAAAQAAAASLGSTGALGADQGACVAATACATKTNDEETPEGLQNCRKYAIEALLCCVEQKSQVMLRVPNFLNRLLEALLMCMLDIRDSSYAKWL…	0	134.562	34	34	65	34	1238	136	4.79	154.35	34	0.915	0.91	0.928	1.089	0.996	0.991	1.01	0.979	1.007	0.998	-0.13	-0.14	-0.11	0.12	-0.01	-0.01	0.02	-0.03	0.01	0	0.357769	0.312657	0.394287	0.392445	0.562543	0.521583	0.379008	0.258004	0.185649	0.87994	0.889498	0.902448	0.922119
FALSE	High	Master Protein	TGGT1_287480-t26_1-p1	transcript=TGGT1_287480-t26_1 | gene=TGGT1_287480 | organism=Toxoplasma_gondii_GT1 | gene_product=hypothetical protein | transcript_product=hypothetical protein | location=TGGT1_chrV:410863-428566(+) | protein_length=4703 | sequence_SO=chromosome | SO=protein_coding_gene | is_pseudo=false	MTAPPVSVAPGAPSPPAPYFPASLVPATAASHLQAAVRLIQEAQALHQLPALSAQDNVGKEKEKVHSQSNEMLPVRPNHAGASARLVKVLLLLGDFGSAAHALKYSLSLGLSASGGRSASKIRWLLRALGSTVIEGRNEHDRERQQYITERKADGRGQAEAEVNKADVNRERRMMMGPADLTGGEKNEEEHMENIFHMQFLRQDRIRIHRQLEELQREDASVLSHARMSSSSMPISLSLPPSPSVSSHEEDPRGVFTLLTFLYNIILAVDEALEVDSGTAAPFSNPPATPALCRMVTVSRASSPLPVPKLVERQLSEATRQLAEIFSPFYSGLSRAATSSVSPGGGCSSPCPAAVPPPRPPAKALASRQGGENEGFTHSGLPQVLEEKGKRGACVPESP…	0	134.413	10	40	51	40	4703	502.4	6.48	105.72	40	0.962	0.996	0.961	1.024	0.984	1.02	0.984	0.992	0.99	0.981	-0.06	-0.01	-0.06	0.03	-0.02	0.03	-0.02	-0.01	-0.01	-0.03	0.612549	0.962859	0.674851	0.631327	0.581401	0.644818	0.722331	0.80783	0.304674	0.595581	0.889498	0.985882	0.922119
FALSE	High	Master Protein	TGGT1_205250-t26_1-p1	transcript=TGGT1_205250-t26_1 | gene=TGGT1_205250 | organism=Toxoplasma_gondii_GT1 | gene_product=Protein kinase domain-containing protein [Source:UniProtKB/TrEMBL;Acc:A0A125YQA8] | transcript_product=rhoptry protein ROP18 | location=TGGT1_chrVIIa:1426782-1428446(-) | protein_length=554 | sequence_SO=chromosome | SO=protein_coding_gene | is_pseudo=false	MFSVQRPPLTRTVVRMGLATLLPKTACLAGLNVALVFLLFQVQDGTGITLGPSKLDSKPTSLDSQQHVADKRWLATVGHYKHLAGATESTRDVSLLEERAQHRVNAQETNQRRTIFQRLLNLLRRRERDGEVSGSAADSSSRPRLSVRQRLAQLWRRAKSLFKRGIRRYFPQGRNRQRSLRAQRRRSELVFEKADSGCVIGKRILAHMQEQIGQPQALENSERLDRILTVAAWPPDVPKRFVSVTTGETRTLVRGAPLGSGGFATVYEATDVETNEELAVKVFMSEKEPTDETMLDLQRESSCYRNFSLAKTAKDAQESCRFMVPSDVVMLEGQPASTEVVIGLTTRWVPNYFLLMMRAEADMSKVISWVFGDASVNKSEFGLVVRMYLSSQAIKLVAN…	0	133.89	42	22	106	22	554	62.3	9.25	265.74	22	1.041	1.04	1.036	0.955	0.994	0.993	0.989	0.992	0.996	0.972	0.06	0.06	0.05	-0.07	-0.01	-0.01	-0.02	-0.01	-0.01	-0.04	0.39041	0.448464	0.66657	0.483496	0.77304	0.622002	0.622496	0.561412	0.739171	0.570403	0.889498	0.902448	0.922119
FALSE	High	Master Protein	TGGT1_226730-t26_1-p1	transcript=TGGT1_226730-t26_1 | gene=TGGT1_226730 | organism=Toxoplasma_gondii_GT1 | gene_product=Aconitate hydratase ACN/IRP [Source:UniProtKB/TrEMBL;Acc:S7UWQ3] | transcript_product=aconitate hydratase ACN/IRP | location=TGGT1_chrX:1308814-1316049(-) | protein_length=1055 | sequence_SO=chromosome | SO=protein_coding_gene | is_pseudo=false	MRILVPLVFLAAQIPPASLERVSVSGFFPRALLFRRVPLPRPICTARCLEVAQARRPRNPFLLPVSSFLLPGSMKALSNIVLPRKGISVAARSTASATAASQPLPRNSRALSKACALPASQAFEGSRRSAGAKEAHVPERHTRLHSALTQSRKMSTSRGNPFAYVAKTLAGTEKTYYDIGALQDDRLKTLPFSIRVLLESAVRNCDGFSIKPEDVQTILDWQKASQAQKEIPFMPARVLLQDFTGVPAVVDLAAMRDAMARLGGPPSSINPLVDVDLVIDHSVQVDFSRSPEAFEKNLAKEMERNSERFSFLKWGSTAFSNMLIVPPGSGIVHQVNLEYLARVVMDKKVGDRAVLYPDSLVGTDSHTTMINGLGVVAWGVGGIEAEAVMLGQQISMVLP…	0	133.841	33	33	98	33	1055	114.8	8.37	237.4	33	1.057	1.048	1.047	0.952	1.006	0.997	0.997	0.997	0.988	0.968	0.08	0.07	0.07	-0.07	0.01	0	0	0	-0.02	-0.05	0.496451	0.586634	0.622967	0.416509	0.783544	0.926539	0.929708	0.945251	0.70552	0.660168	0.889498	0.902448	0.922119
FALSE	High	Master Protein	TGGT1_202530-t26_1-p1	transcript=TGGT1_202530-t26_1 | gene=TGGT1_202530 | organism=Toxoplasma_gondii_GT1 | gene_product=AA_TRNA_LIGASE_II domain-containing protein [Source:UniProtKB/TrEMBL;Acc:S7WAH7] | transcript_product=aspartate-tRNA ligase | location=TGGT1_chrVIIa:3153086-3158845(-) | protein_length=773 | sequence_SO=chromosome | SO=protein_coding_gene | is_pseudo=false	MERDGLCSLCMRFPPFRFAPILFIFSLFLIDTEEVFLPQQRPASRFFLSTSAPFSPLRSSGVSELSSSPPSAPLVPWPSSLSASFLSSGAACRRSPFRSSAFAAAEPGDRCFGRNKENWRMRVLPSSSLCFTSVSPSSARAPVTSRCFSSLPTKALKPSVSFIRVSRFRSSSALLKPRSLPLSSARCSSLAGHSAEVDRRMPSAVSVSSSPTTPSLLRAFSCLSSLPPAMPEETPKREEAAPSVAEVAEAPVSKKAQKKAEKEAAKEAAKAAKREALEAEQRAAQAVMNKQVEDLEKDAFGYLPVIDSRMRTNREWIPVDQLRNHVGKTVWVRGRIQESRGKGSVGFLMLRERQETVQGVLDAKRGNTKDMIKWTMSLPLESVVDLQGTVVEPEVEIQS…	0	133.667	39	28	77	28	773	86.7	8.22	219.08	28	0.893	0.903	0.889	1.111	0.992	1.004	0.988	0.993	0.994	0.968	-0.16	-0.15	-0.17	0.15	-0.01	0.01	-0.02	-0.01	-0.01	-0.05	0.502579	0.556771	0.514862	0.571682	0.750432	0.789905	0.431557	0.178805	0.849669	0.517314	0.889498	0.902448	0.922119
FALSE	High	Master Protein	TGGT1_250820-t26_1-p1	transcript=TGGT1_250820-t26_1 | gene=TGGT1_250820 | organism=Toxoplasma_gondii_GT1 | gene_product=hypothetical protein | transcript_product=hypothetical protein | location=TGGT1_chrXII:5170586-5175102(+) | protein_length=1156 | sequence_SO=chromosome | SO=protein_coding_gene | is_pseudo=false	MPKAYARAERGSTSQKARDQKVLRPPALDVSRVSGKISDRSERSASALMTPQSRNSPSVSAPSTPARSSKGHSDAGKARRGLQESARSRSPSRKVTTGKGKKLEHASMDGQQGELSRAADQATHSQLVTLDFERGVAEAPRRALKGQTAGVQVNHHGSSLQKALDNLTPRKAALAVELERAQLEVASLKRLVTEVSSGKTPLAVPAELFYQLSLACLSGNTRVAAKPHLSHREDVGKSSPKAAGHGRQAGKGREGGNEGEKRDAALSADQEEAVSGLRSGPSSVDWGEVEQRIRVDVEGEAPMVWKDVYRLRQGAKPEHISSSCSGVGAGETKKGALGDHSQISVDIPSGDEAAAWHPKGNKTEQRMLYSPREGGFSLFLPDTVNAAMGHPYRRSHSCT…	0	133.299	29	31	65	31	1156	120.8	9.25	185.37	31	1.089	1.077	1.081	0.935	1.018	1.007	1.011	1.033	1.016	1.039	0.12	0.11	0.11	-0.1	0.03	0.01	0.02	0.05	0.02	0.05	0.435287	0.400401	0.388526	0.583311	0.503919	0.869973	0.801474	0.337752	0.521101	0.559703	0.889498	0.902448	0.922119
FALSE	High	Master Protein	TGGT1_218960-t26_1-p1	transcript=TGGT1_218960-t26_1 | gene=TGGT1_218960 | organism=Toxoplasma_gondii_GT1 | gene_product=AP2 domain transcription factor AP2XII-1 [Source:UniProtKB/TrEMBL;Acc:A0A125YNZ7] | transcript_product=AP2 domain transcription factor AP2XII-1 | location=TGGT1_chrXII:1115397-1126277(-) | protein_length=2283 | sequence_SO=chromosome | SO=protein_coding_gene | is_pseudo=false	MDSGRDVKDGTAGSRPKDGGDGVGETRASGRESEERSLQLEANECPGAVMSRREDEAEPQSSPSSSPPREEGPQNVDDADSANGSGEAGLQRPPQKRRLEQGLEAEAGVGSSRVEEVEAVCRKRPAFSGVADAFLERPVTLKNSSEEDAARLSGDDAAGASLLCVRSAGALTGDFPSSSSRLPAMLSGARGENAEESVRDAHTPAQDSRDSALASFAPTLAPGQESEYTRAKLWSIEKAFDAFLADQKANGRRQGSRSMREPSHAHPGLSAERETSSGASAATSDLSREDVEELFRQHGVSPRELVRMLSGRRDGPGTSPEELRAAVAWARQLFPAAPRSPSELRMYLQRAVLDRQKRLRERWGAEANPCGDASVYGDEKLREHLSDLSAFMPHLDAGR…	0	133.181	19	39	57	39	2283	247.7	5.91	118.71	39	0.991	0.899	0.916	1.157	1.147	1.04	1.059	1.005	1.044	1.042	-0.01	-0.15	-0.13	0.21	0.2	0.06	0.08	0.01	0.06	0.06	0.976215	0.602593	0.610908	0.370737	0.513846	0.592193	0.302488	0.758128	0.46999	0.6012	0.98745	0.902448	0.922119
FALSE	High	Master Protein	TGGT1_264860-t26_1-p1	transcript=TGGT1_264860-t26_1 | gene=TGGT1_264860 | organism=Toxoplasma_gondii_GT1 | gene_product=RING-type domain-containing protein [Source:UniProtKB/TrEMBL;Acc:S7VP61] | transcript_product=zinc finger, C3HC4 type (RING finger) domain-containing protein | location=TGGT1_chrIX:1768340-1781509(-) | protein_length=3868 | sequence_SO=chromosome | SO=protein_coding_gene | is_pseudo=false	MAPNEKIPATSASRGKQLTGKQLKRQLRGEAASSSRAAQLVSSLSPSVDPGAPGGATQLAAIFAHFAQASTASSAPGEDQGLSASLAASSSRSPSSVAPATSSSGCAKAPGGAQRSRYPETASEAPSSVAAGRGALRQADAGEQQQIDDIHRALVKLTKRDSVTRLKGLQELEFLLHASRGSASPSSDGFSPSSDGLNPPSPVSSASSPVSSASSPVSSASSPAFSVSASSSSSSSSHPASASSPDLSSLSPATASSAASAAGQTLSDEAFLVIAEAILPQFVYVYGRLAVWDSERRIRAGVNRCLSLIASRARKLLGPHLRAMLPLWWISSHDDAAEVALAAQEALDFAFPPFAASSSAAAPGAASSSPTLFFRGFVGHRARLAAAFDHCREALFSEY…	0	133.12	11	34	42	34	3868	413.9	6.3	104.2	34	0.877	0.869	0.875	1.132	0.992	0.983	0.991	1.006	0.966	0.988	-0.19	-0.2	-0.19	0.18	-0.01	-0.02	-0.01	0.01	-0.05	-0.02	0.446622	0.402787	0.425714	0.421485	0.685108	0.239488	0.477155	0.423523	0.285192	0.735694	0.889498	0.902448	0.922119
FALSE	High	Master Protein	TGGT1_300100-t26_1-p1	transcript=TGGT1_300100-t26_1 | gene=TGGT1_300100 | organism=Toxoplasma_gondii_GT1 | gene_product=Rhoptry neck protein RON2 [Source:UniProtKB/TrEMBL;Acc:S7UGV9] | transcript_product=rhoptry neck protein RON2 | location=TGGT1_chrXII:175560-186129(-) | protein_length=1479 | sequence_SO=chromosome | SO=protein_coding_gene | is_pseudo=false	MTKRAGLPLGRAFLVLILLSAADSLFFSSFPRSALQLFSSVLFTDAAEPDSDATPGLRPQPSPRTFRPTGYQRIEVKTVDEELPEDLKVYTASTRGSSSRTFEVRNAGGRQEGFTLSVLTAGGPLPHGSWSWSGTPPEVQTTGGSQISFGWVPDTETPSLPERNLLQLKRMLRDEGLIEAVQLRAAEKGCPVAVLHNLRQLPVNFREVLHEEYESRSNPAKMYEVANSYVQQRGSDAARWSVSQSVELSLLEMHATSTTDPRGSSAVPSFLETGPQVRVAMTDAVPSGIRVYATPPAPRPVPVQSNQTEKERSPTSKRLVGMQLGLYLICKLAALFGHPTLFLNPYYTEQQLLEAVAQALGIAPPHRGDFENEGNEAQATANQHNGSADQLLAAIEIFR…	0	132.973	22	32	97	32	1479	166.3	9.58	247.78	32	1.019	1.021	1.021	0.981	1	1.002	1.001	1.005	1.012	0.984	0.03	0.03	0.03	-0.03	0	0	0	0.01	0.02	-0.02	0.573668	0.65176	0.630023	0.567616	0.176837	0.898325	0.882698	0.629618	0.319337	0.749916	0.889498	0.902448	0.922119
FALSE	High	Master Protein	Q15149	Plectin OS=Homo sapiens (Human) OX=9606 GN=PLEC PE=1 SV=3	MVAGMLMPRDQLRAIYEVLFREGVMVAKKDRRPRSLHPHVPGVTNLQVMRAMASLRARGLVRETFAWCHFYWYLTNEGIAHLRQYLHLPPEIVPASLQRVRRPVAMVMPARRTPHVQAVQGPLGSPPKRGPLPTEEQRVYRRKELEEVSPETPVVPATTQRTLARPGPEPAPATDERDRVQKKTFTKWVNKHLIKAQRHISDLYEDLRDGHNLISLLEVLSGDSLPREKGRMRFHKLQNVQIALDYLRHRQVKLVNIRNDDIADGNPKLTLGLIWTIILHFQISDIQVSGQSEDMTAKEKLLLWSQRMVEGYQGLRCDNFTSSWRDGRLFNAIIHRHKPLLIDMNKVYRQTNLENLDQAFSVAERDLGVTRLLDPEDVDVPQPDEKSIITYVSSLYDAM…	0	132.821	10	46	55	45	4684	531.5	5.96	118.69	46	0.951	1.005	0.984	1.093	1.04	1.099	1.075	1.089	1.082	1.074	-0.07	0.01	-0.02	0.13	0.06	0.14	0.1	0.12	0.11	0.1	0.75597	0.958733	0.935011	0.568831	0.198878	0.224858	0.388504	0.0388879	0.208633	0.281154	0.898988	0.98458	0.975951
FALSE	High	Master Protein	TGGT1_289300-t26_1-p1	transcript=TGGT1_289300-t26_1 | gene=TGGT1_289300 | organism=Toxoplasma_gondii_GT1 | gene_product=tRNA-binding domain-containing protein [Source:UniProtKB/TrEMBL;Acc:S7VYI1] | transcript_product=methionyl-tRNA synthetase | location=TGGT1_chrIX:2966904-2971258(+) | protein_length=976 | sequence_SO=chromosome | SO=protein_coding_gene | is_pseudo=false	MSTMTGSSPKSAASSTPLRLVAGSAVPRGDVAACIAVGHALNIPVVLVSKDADKAEQAEPSSSAPAPPPQAPVASSASEEDKKDLCVLLTREGSVVSAYAICLYLLSLARKRLAETKTAAPEKRLESREKLSEAYEGDAWQAEDALAWAAFKLRGALRGVRKDLLLQQLNLLEERIAGSSDCAFPALSALLSTSAPSPFVAPAMFVFCMLRYAHPTSAFSDWPALSAFLGSLGASPAAAATLKAVPLPARSCGFPEMSQALLASAGACAVAQRQREKFYITTAINYTNGPPHMGHVYEIVTSDALARFHRIAGRDVFFLTGTDEHGQKIANTAERLGKTPQEICDFYAAGFQAMNAKLCVSNDQYIRTTQAAHKAVCQWLWKRVQERGDIYLDTYVGWY…	0	132.572	35	28	66	28	976	106	6.67	198.74	28	0.969	0.97	0.958	1.012	0.981	0.981	0.97	0.996	1.02	0.977	-0.04	-0.04	-0.06	0.02	-0.03	-0.03	-0.04	-0.01	0.03	-0.03	0.659921	0.670789	0.443412	0.883956	0.353645	0.310771	0.475159	0.849916	0.453638	0.393084	0.889498	0.902448	0.922119
FALSE	High	Master Protein	TGGT1_209210-t26_1-p1	transcript=TGGT1_209210-t26_1 | gene=TGGT1_209210 | organism=Toxoplasma_gondii_GT1 | gene_product=hypothetical protein | transcript_product=hypothetical protein | location=TGGT1_chrIb:1139917-1148599(+) | protein_length=1492 | sequence_SO=chromosome | SO=protein_coding_gene | is_pseudo=false	MDLTGEESGSPAELPRERKGGEFAHPDEGPCYDTDEEHNDSSRGAAHSEKGESPETPLAQAAAEEEREERREEEREEEREDGREEEREEEMEERGDARSVQGEEDGVSCSASNADLLRDEGEGGEETMELLEKDTREARKRGREETAREDADIYASCPEALLEEMPDGSKIRSALQRPVLGVLVGDTYFIKVTNEDAAFIIGRGGSTKKKIAGVSGCRVELEDNGLRLDVTGTEEQRERALLYIRLIMQQRLGPVRWNSERNDMCTEGVARLFPLQDEEADAKKAPRKDLTVLEIPSEAVAYVTGSNGQVLRRIEDEWRTLMFFTQQERGAGKGAAAQTAAKRSGRRAEVDEKDAPDAKDAPDAKDAETGAGEHGKDAAPVGGKMEELLIFGSERSRVG…	0	132.527	26	33	59	33	1492	166.8	5.54	124.44	33	1.029	1.018	1.004	0.983	1.012	1.001	0.988	1.012	1.005	0.979	0.04	0.03	0.01	-0.02	0.02	0	-0.02	0.02	0.01	-0.03	0.0102382	0.315589	0.624395	0.4871	0.601561	0.949676	0.421723	0.525973	0.738299	0.49181	0.889498	0.902448	0.922119
FALSE	High	Master Protein	TGGT1_243960-t26_1-p1	transcript=TGGT1_243960-t26_1 | gene=TGGT1_243960 | organism=Toxoplasma_gondii_GT1 | gene_product=NTF2 domain-containing protein [Source:UniProtKB/TrEMBL;Acc:A0A125YLE0] | transcript_product=nuclear transport factor 2 (ntf2) domain-containing protein | location=TGGT1_chrVI:2828443-2833407(-) | protein_length=797 | sequence_SO=chromosome | SO=protein_coding_gene | is_pseudo=false	MSVYSVHPSGAPASSGGGFHHSAQNTAFSGHHGYGGNSGLHPSSSARGAGYGQPHHLQQQQMQLHLQQPPLPPPPHHQQYQGFTNAGNYSQQHNQSAQQLPQQGHPHSYAQPNAMSGASTLGSSSTFMFPSQGGAGGAPAGSSGPSAPLMMDGQGSGPLGAQVTSVAQQGPEAEHAVHAAAKPRMLTPMEVAHSFVYQYYYMLHDTPLDLHRFYDFDSQMIRTTDRDGTVPHSAPHHTDVRATGQREIYRAFERGRFERTTCRVRFIDAQENKDGGMLILVAGRLKHADEGPEREFAQTVFLAKQKAPRNGWYVTNEIFCYLDAAVEEVENGAREAVVPSSPSPRSRATAQDAPFQQGESSPTTVEAPATTSLVPEQSSPRGSVGGDSVRAPNAPATPI…	0	132.407	33	23	68	23	797	84.1	9.04	161.39	23	0.996	1.008	1.002	1.011	1.007	1.019	1.013	1.021	1.009	0.991	-0.01	0.01	0	0.02	0.01	0.03	0.02	0.03	0.01	-0.01	0.509288	0.782838	0.686878	0.728282	0.840152	0.0646916	0.722524	0.152555	0.692659	0.0706317	0.889498	0.917578	0.922119
FALSE	High	Master Protein	TGGT1_216860-t26_1-p1	transcript=TGGT1_216860-t26_1 | gene=TGGT1_216860 | organism=Toxoplasma_gondii_GT1 | gene_product=DEAD (Asp-Glu-Ala-Asp) box polypeptide DDX39 [Source:UniProtKB/TrEMBL;Acc:A0A125YNR1] | transcript_product=DEAD (Asp-Glu-Ala-Asp) box polypeptide DDX39 | location=TGGT1_chrXI:5764687-5768776(+) | protein_length=434 | sequence_SO=chromosome | SO=protein_coding_gene | is_pseudo=false	MTTLEQNPADELVDYEEDEQNDAKEKGVEDVVVGRGNYVSIHASGFRDFFLKPELLRAIGDAGFEHPSEVQHETIPHAITGVDVLCQAKSGMGKTAVFVLSILQQLNLDTSGEEGNTQGVVCLGIAHTRELAFQIKNEFDRFSKYLKNVKCEVVYGGISIQKNIDMLKDAKTTPHILIGTPGRVLALIKGKHLNAEKVAHFVLDECDKCLEKLDMRKDVQNIFMATPKKKQVMFFSATMNKEIRDVCKRFMQSPVEVFIDDESKLTLHGLLQYYVKLQESEKNRKLNDLLDTLEFNQVIIFVKSVSRAQALDRLLTECNFPSIAIHAGLDQEERINRYQQFKNFEKRIMVATDLFGRGIDIERVNIVINYDMPDSSDSYLHRVGRAGRFGTKGLAITFV…	0	132.329	51	19	77	19	434	49.1	5.85	242.16	19	1.015	1.037	1.009	0.971	0.986	1.007	0.98	1.004	1.014	1.009	0.02	0.05	0.01	-0.04	-0.02	0.01	-0.03	0.01	0.02	0.01	0.217444	0.0434084	0.670204	0.363828	0.488219	0.793168	0.10542	0.762817	0.234279	0.584457	0.889498	0.902448	0.922119
FALSE	High	Master Protein	TGGT1_294898-t26_1-p1	transcript=TGGT1_294898-t26_1 | gene=TGGT1_294898 | organism=Toxoplasma_gondii_GT1 | gene_product=Tetratricopeptide repeat-containing protein [Source:UniProtKB/TrEMBL;Acc:S7VXI5] | transcript_product=tetratricopeptide repeat-containing protein | location=TGGT1_chrIa:1236755-1244990(-) | protein_length=827 | sequence_SO=chromosome | SO=protein_coding_gene | is_pseudo=false	MAPQHPAAAVSTADPAEKDATLEAAATGASACPRSAPTEQPSSAMHSRENTLGAQLFCCSGVDLGAQNSVLASADLAAPLAVDVEGNALSNRSTPSTEAFDGKLRLVGEEAEARATSNLRNTISHLPLWVAVKDEASLEKLKTRFPFSSFPAVSFDSRRREPVFTVAFDGESTQVGLTVVLAHFLKTVVSFAGTSRGRAVETRALAVALPSSFSTEEMSLVREACDLACLSRLVVPEVAESGDATDSDKNAAGEADGEKVDPTAGPLLLTRADALLNCWGCKHLPQVYAELPAGVCTPESGDEEGEVKFVALVDVGFAETSVQVAELRPRAEKDVNERQKIQDQIVMNRLSVVVDDALGTVDAINALATHVVGAVKTKYGEDVAPHSKRALRLFAGCQR…	0	132.228	38	29	73	29	827	88.6	5.29	170.15	29	1.044	1.023	1.04	0.967	1.01	0.989	1.006	1	0.991	0.983	0.06	0.03	0.06	-0.05	0.01	-0.02	0.01	0	-0.01	-0.03	0.570684	0.602048	0.363995	0.450698	0.760485	0.144005	0.289155	0.989023	0.0486921	0.64898	0.889498	0.902448	0.922119
FALSE	High	Master Protein	TGGT1_313140-t26_1-p1	transcript=TGGT1_313140-t26_1 | gene=TGGT1_313140 | organism=Toxoplasma_gondii_GT1 | gene_product=Iso_dh domain-containing protein [Source:UniProtKB/TrEMBL;Acc:S7W894] | transcript_product=isocitrate dehydrogenase | location=TGGT1_chrXI:3095680-3101525(-) | protein_length=621 | sequence_SO=chromosome | SO=protein_coding_gene | is_pseudo=false	MRAENSGFSQKSVRFWTPLESVQPRTACSFSLCLLWKVCLLSCGVLRTHLRTRSASISRVGGAFQTFPTNRPCVFSKKMASALRRITARAASPAFPFTSVQSSTFARALSTKSACVRPQLLSSALCNTVSSTSSSASSGLAVSPVQKSGNPDASPRFFASAASVATGGAFNLEGKIHVANPVVEMDGDEMTRILWAWIKEKLLFPYVEIPLEYYDLSVTNRDQTEDKVTLEAAEAIKKCHVGIKCATITPDEGRVKEFNLKKMWKSPNGTIRNILDGTVFRAPILISNVPRLVPGWKKPIVIGRHAYGDQYKAESLVCDGPGDFTISFTPAGGSRVEKKVFSFSGPGVMLGMYNTEDSIRGFALSSFKFALQQNMPLYLSTKNTILKQYDGMFKDIFQS…	0	131.974	36	20	73	19	621	68.3	8.59	229.45	20	0.968	0.943	0.936	1.048	1.014	0.988	0.981	1.023	1.013	1.007	-0.05	-0.09	-0.1	0.07	0.02	-0.02	-0.03	0.03	0.02	0.01	0.151662	0.0835353	0.270504	0.1353	0.0959598	0.120247	0.511047	0.497149	0.0617832	0.0638931	0.889498	0.902448	0.922119
FALSE	High	Master Protein	TGGT1_233460-t26_1-p1	transcript=TGGT1_233460-t26_1 | gene=TGGT1_233460 | organism=Toxoplasma_gondii_GT1 | gene_product=SAG-related sequence SRS29B [Source:UniProtKB/TrEMBL;Acc:A0A125YG48] | transcript_product=SAG-related sequence SRS29B | location=TGGT1_chrVIII:2660455-2661465(+) | protein_length=336 | sequence_SO=chromosome | SO=protein_coding_gene | is_pseudo=false	MSVSLHHFIISSGFLTSMFPKAVRRAVTAGVFAAPTLMSFLRCGVMASDPPLVANQVVTCPDKKSTAAVILTPTENHFTLKCPKTALTEPPTLAYSPNRQICPAGTTSSCTSKAVTLSSLIPEAEDSWWTGDSASLDTAGIKLTVPIEKFPVTTQTFVVGCIKGDDAQSCMVTVTVQARASSVVNNVARCSYGADSTLGPVKLSAEGPTTMTLVCGKDGVKVPQDNNQYCSGTTLTGCNEKSFKDILPKLTENPWQGNASSDKGATLTIKKEAFPAESKSVIIGCTGGSPEKHHCTVKLEFAGAAGSAKSAAGTASHVSIFAMVIGLIGSIAACVA	0	131.913	63	20	194	20	336	34.8	8.02	593.98	20	1.072	1.072	1.08	0.935	1.002	1.002	1.01	1.013	1.009	1.015	0.1	0.1	0.11	-0.1	0	0	0.01	0.02	0.01	0.02	0.569053	0.573067	0.558219	0.556018	0.768294	0.808843	0.572484	0.203538	0.118615	0.315848	0.889498	0.902448	0.922119
FALSE	High	Master Protein	TGGT1_304760-t26_1-p1	transcript=TGGT1_304760-t26_1 | gene=TGGT1_304760 | organism=Toxoplasma_gondii_GT1 | gene_product=RNA recognition motif-containing protein [Source:UniProtKB/TrEMBL;Acc:S7W2V6] | transcript_product=RNA recognition motif-containing protein | location=TGGT1_chrVIIa:667907-675253(+) | protein_length=1335 | sequence_SO=chromosome | SO=protein_coding_gene | is_pseudo=false	MATTSLEEEEYMEGERDEGWGEAGEQREGRLVVAQSRSVSRERELHAASFPVEYDGEDDSPYLQPSERVASKRDEGDPEESDVDHEREERDACYGWESEKEGRPEAPDEGSAASRDEDAEARDDGEGGRQEGGEEDVGENEGEEAAEDLEETRRDDEDSLTICGEKGNDSDPIDERKVFVGNTPLAVREPSVERIFGEFGKLSEIKIFKHFLHLTYDDATAATRAVEELNDKEVWGAQIVVEPLRPGAASQRPPGAGAARVVVSRGERDTGAPGVERGRGRGRSGAVAGRGKSAGSVAGARRGGRGRGGQAAGPGGKRLPFRVVCHNLDPRVHWQDLKDFGREAGEVNFTNVLHNQEGVRIGIIEYCSQEDMETALHELDGKRLFDARVEVRREEANAS…	0	131.82	27	29	54	29	1335	147	6.16	146.56	29	0.951	0.964	0.95	1.047	0.996	1.009	0.995	1.003	0.991	0.997	-0.07	-0.05	-0.07	0.07	-0.01	0.01	-0.01	0	-0.01	0	0.637294	0.698477	0.552403	0.61249	0.790886	0.338229	0.610821	0.431184	0.510044	0.44778	0.889498	0.903402	0.922119
FALSE	High	Master Protein	TGGT1_214840-t26_1-p1	transcript=TGGT1_214840-t26_1 | gene=TGGT1_214840 | organism=Toxoplasma_gondii_GT1 | gene_product=AP2 domain transcription factor AP2X-7 [Source:UniProtKB/TrEMBL;Acc:S7UQH1] | transcript_product=AP2 domain transcription factor AP2X-7 | location=TGGT1_chrX:6426532-6432141(+) | protein_length=1869 | sequence_SO=chromosome | SO=protein_coding_gene | is_pseudo=false	MEAMAEPTPPAPGGEILRDAVRMETPLPEKSVGADLSSESVANTEEERGTSLPDPAAQLQDADLSSGDLAADRSTEIALSTQLQLEQLDALQRHVQKQLLAGVSSLATESEKLQTGEVGAPFAGVSGDSGDSEEGREALASKTGEAPDAAEKGPAAAHFKAKGWGNDAGLAALSGGTTVEEEGENSSSSLGFSASSPGGQGSGEDTSALLPATSAVKQGTQDDLRLLVLQESMIKGTPGVALPTLEGAGGRVTPSASDQTFSSIQFAEEAQSPQKPTTLPALLTAGKRTRRGQAATGSDAAEGEAKALASPSALRFCGENPQSSLSTPQDVDAHGQSTEATPASSVHASGERKAKREEPEPMKTRRLARAAAQAAALAAASSGGQDGAASVKDGKTDLS…	0	131.698	16	25	48	25	1869	183.9	5.15	137.22	25	0.952	0.945	0.954	1.029	0.979	0.973	0.982	1.015	0.969	0.988	-0.07	-0.08	-0.07	0.04	-0.03	-0.04	-0.03	0.02	-0.05	-0.02	0.512595	0.524226	0.59479	0.749707	0.447923	0.190901	0.176772	0.4865	0.309959	0.457518	0.889498	0.902448	0.922119
FALSE	High	Master Protein	TGGT1_204160-t26_1-p1	transcript=TGGT1_204160-t26_1 | gene=TGGT1_204160 | organism=Toxoplasma_gondii_GT1 | gene_product=GYF domain-containing protein [Source:UniProtKB/TrEMBL;Acc:S7W354] | transcript_product=GYF domain-containing protein | location=TGGT1_chrVIIa:1837535-1846323(-) | protein_length=1797 | sequence_SO=chromosome | SO=protein_coding_gene | is_pseudo=false	AAGGASGDPAQAGQEVKSGCTFFVQEKRGLRLFQVLTAPGAEKKGKKKLVELLHHADMQQATWSPCGRRLALVSQDQALVVFEHPTWTVSDVSKLWRGPAALASYCEKKAKSEGAAEGAGDEDEKTRDDASRPVLRDVQQFSLPLPERALAATSLAQPKYLQWSPLGTYLVAFYNVEKKRNGEEDSASQDHNVFVWDVAAREVVASFFVRRLVGSQWPLLKWRDDELFCCIASRNCIQVFSGHDLKKMLLRFPVPRVFNIEVAPCFSPELEQELLIGAFCPAAAPAGPALSNAQNANPQTAQFYVFHIPSVATAAATLASSCDVDWTLNPQARLQELLQTQRANLEKTEAAVKAALAQPAGVGAAEKKKGDSDSEEDASEGDLATSRSGVKPLAFYTVD…	0	130.299	23	36	57	36	1797	187.4	7.25	118.73	36	0.952	0.949	0.962	1.051	1.001	0.998	1.011	1.011	1.021	0.967	-0.07	-0.08	-0.06	0.07	0	0	0.02	0.02	0.03	-0.05	0.725414	0.677774	0.737039	0.597286	0.98509	0.941664	0.695239	0.736244	0.634886	0.0471056	0.894792	0.902448	0.925021
FALSE	High	Master Protein	TGGT1_233220-t26_1-p1	transcript=TGGT1_233220-t26_1 | gene=TGGT1_233220 | organism=Toxoplasma_gondii_GT1 | gene_product=hypothetical protein | transcript_product=hypothetical protein | location=TGGT1_chrVIII:2508163-2514202(-) | protein_length=1476 | sequence_SO=chromosome | SO=protein_coding_gene | is_pseudo=false	MEQSAGVRRFFSNLSFIGTTVALLLLASAGLPISASAEAANENAAAGVWTQPSVSRESGPVLDVMRTALLRSANSSSATSLDKTQSDQMADTDVGVTLDSLRDLTDSQERVAAADTAAILSSELDQFPAAHVVALSPRYRLLSSFTTNASVASSSGESGRLFSTTRKEGTTPRALRPKAEKSATVNQGEGQPTEFAIDATDDGHKLAPRRGTGIEAKAGGAQESEERADASWELGAPPSSLNVESVLATPPAAAGVSHMHSMPGKGYPGVASLSGRAIEEQDVSRFSAENEAVDKPRHLRDDDVYAAFSETGEHHRSAEPSDASSGLSRPSGTPNPPNIILSGDASSTSGNSHSPAEASTGRRRHAGGAFPTSDDEIREWLITGAPFVPQVPAASINGP…	0	129.899	23	27	55	27	1476	159.9	6.54	164.88	27	1.034	1.001	1.046	0.966	0.999	0.967	1.011	0.982	0.967	0.989	0.05	0	0.07	-0.05	0	-0.05	0.02	-0.03	-0.05	-0.02	0.309322	0.988209	0.39469	0.697152	0.988831	0.452194	0.807356	0.678749	0.428407	0.774162	0.889498	0.995248	0.922119
FALSE	High	Master Protein	TGGT1_311360-t26_1-p1	transcript=TGGT1_311360-t26_1 | gene=TGGT1_311360 | organism=Toxoplasma_gondii_GT1 | gene_product=Protein kinase G AGC kinase family member PKG [Source:UniProtKB/TrEMBL;Acc:S7UT18] | transcript_product=protein kinase G AGC kinase family member PKG | location=TGGT1_chrXI:1956120-1971174(-) | protein_length=994 | sequence_SO=chromosome | SO=protein_coding_gene | is_pseudo=false	MGACISKNSSARVSRSSALSASKQTVAASAPPGAAGDETSATGAAEEASRNSLARVDGTRASAAELERAPDGVCPDREEPGTANAEQGGVTEKKDTRETLAGMNSPKTLEAEAQEDDLKREAPNQDVPSEAPEGPKEKPGGDRKPAQKAILKQDDSHTEEEKLNAHLAYREKTPADFALIQDSLKANLVCSSLNEGEIDALAVAMQFFTFKKGDVVTKQGEPGSYFFIIHSGTFDVLVNDKRVNAMDKGKAFGEIALIHNTERSATVVASSTEGALWGVQRHTFRETLKQLSSRNFAENRQFLASVKFFEMLTEAQKNVITNALVVENFKPGQPIVKEGDAGDVLYILKSGKAKVSIGGREIRMLRKGDYFGERALLYKEPRSATITAEEFTVCVSIGR…	0	129.605	29	27	64	27	994	111.2	6.16	154.16	27	1.107	1.156	1.157	0.896	0.992	1.035	1.037	0.99	1.023	1.004	0.15	0.21	0.21	-0.16	-0.01	0.05	0.05	-0.01	0.03	0.01	0.363563	0.311119	0.403356	0.456419	0.833168	0.315786	0.196075	0.645583	0.101821	0.512972	0.889498	0.902448	0.922119
FALSE	High	Master Protein	TGGT1_311030-t26_1-p1	transcript=TGGT1_311030-t26_1 | gene=TGGT1_311030 | organism=Toxoplasma_gondii_GT1 | gene_product=U3snoRNP10 domain-containing protein [Source:UniProtKB/TrEMBL;Acc:S7W237] | transcript_product=hypothetical protein | location=TGGT1_chrXI:1692933-1708438(-) | protein_length=3738 | sequence_SO=chromosome | SO=protein_coding_gene | is_pseudo=false	MVSELQRQLALHRQTRGVGSSSTASCSSARRQHAAPSLLFDPRKAASIDIETLRDVALTSLQSLSRREPLVEVLEPFFALSASRQGKNSPQSRDFMTEDQSRVLDRRVSICCDLLGPFFLLQDAQYLLEYLLRQYAIHQHNQDALLALALPYHNSPVFVRLVRLMTLPPNSPWIFLERMRASGAPLQRRDLVKVVLSSPFLLQFLVDTVARVSAPLSAARLKEASLSPLPSHLQDGRAGNDEILLMPTSRLPAQNTPLLSFFTLLVSESIVAAPSLAAVRTLTPCLLPFLLSTLHPTSAVRTPELHAAGLAILAQIAMRAPLDPAILVAAMQQLSQTLVLSAADDGLPQLSASKENEIFSLLVLIADKQSLALQGTLPCAVTRRLTKWTRLAAATEELL…	0	128.603	11	36	51	36	3738	402.6	6.87	109.79	36	0.973	0.961	0.973	1.029	1.001	0.989	1.001	1.009	0.996	0.978	-0.04	-0.06	-0.04	0.04	0	-0.02	0	0.01	-0.01	-0.03	0.738415	0.0369175	0.580958	0.507871	0.981242	0.747409	0.8479	0.700194	0.921206	0.531132	0.894792	0.902448	0.922119
FALSE	High	Master Protein	TGGT1_288650-t26_1-p1	transcript=TGGT1_288650-t26_1 | gene=TGGT1_288650 | organism=Toxoplasma_gondii_GT1 | gene_product=Dense granule protein GRA12 [Source:UniProtKB/TrEMBL;Acc:S7VY87] | transcript_product=dense granule protein GRA12 | location=TGGT1_chrIX:2467879-2469672(-) | protein_length=436 | sequence_SO=chromosome | SO=protein_coding_gene | is_pseudo=false	MRAIMASTQQFLRPVGSRPLAGISVVVVVALAIALGTAADVGRHVGGFSGPFPMTLRSGQWRLDHGACFVGKAKNLVVDPLPRVSPQGPQPLDVTTTGSALCWWLDSMYAAHMSLKAAWEKRHQEAKNRTSWLNLWRRFANWWASFPEFQIDVSVLYLDLWNDDFYGHPLPWFSAEFSYTPPSGRYAYNLFDKLQSHFASAPGTAVQEVFLLLAPAPTFNQPVEKRSSIVARAATVAAGNELFKEALGHQRVDEVLSMVPADPFRLMLSTSAFSFQAKIGDFWERGLDCMLGSRLNLRWDQVGTSVCRYMTAKASETGSGLAASFLNTVEVRVTGMDFFNHAAPVFKTEFIEGIITKRATYIPVSMYLSTDPTLTHEYEAAKTVKRAVQAGRVGAALAR…	0	128.176	44	16	104	16	436	47.9	9.2	272	16	0.962	0.952	0.949	1.042	1.003	0.992	0.99	0.99	0.992	0.964	-0.06	-0.07	-0.07	0.06	0	-0.01	-0.02	-0.01	-0.01	-0.05	0.219858	0.288684	0.102897	0.0593393	0.89985	0.826704	0.551041	0.193726	0.366592	0.627523	0.889498	0.902448	0.922119
FALSE	High	Master Protein	Q09666	Neuroblast differentiation-associated protein AHNAK OS=Homo sapiens (Human) OX=9606 GN=AHNAK PE=1 SV=2	MEKEETTRELLLPNWQGSGSHGLTIAQRDDGVFVQEVTQNSPAARTGVVKEGDQIVGATIYFDNLQSGEVTQLLNTMGHHTVGLKLHRKGDRSPEPGQTWTREVFSSCSSEVVLSGDDEEYQRIYTTKIKPRLKSEDGVEGDLGETQSRTITVTRRVTAYTVDVTGREGAKDIDISSPEFKIKIPRHELTEISNVDVETQSGKTVIRLPSGSGAASPTGSAVDIRAGAISASGPELQGAGHSKLQVTMPGIKVGGSGVNVNAKGLDLGGRGGVQVPAVDISSSLGGRAVEVQGPSLESGDHGKIKFPTMKVPKFGVSTGREGQTPKAGLRVSAPEVSVGHKGGKPGLTIQAPQLEVSVPSANIEGLEGKLKGPQITGPSLEGDLGLKGAKPQGHIGVDA…	0	127.865	17	38	58	37	5890	628.7	6.15	119.24	38	1.045	1.028	1.082	0.962	1.005	0.989	1.041	1.03	1.039	1.063	0.06	0.04	0.11	-0.06	0.01	-0.02	0.06	0.04	0.06	0.09	0.52629	0.814862	0.605762	0.704699	0.903308	0.570585	0.437912	0.204336	0.27435	0.465897	0.889498	0.927573	0.922119
FALSE	High	Master Protein	TGGT1_205710-t26_1-p1	transcript=TGGT1_205710-t26_1 | gene=TGGT1_205710 | organism=Toxoplasma_gondii_GT1 | gene_product=Lysine--tRNA ligase [Source:UniProtKB/TrEMBL;Acc:A0A125YM18] | transcript_product=lysine-tRNA ligase | location=TGGT1_chrVIIa:1115364-1120007(+) | protein_length=658 | sequence_SO=chromosome | SO=protein_coding_gene | is_pseudo=false	MRSPCSGGKSLFEALSLVFCWRPRVWPRVLQSGASQSRHQFLNSYRLPGTSPHFRPVSTMAPPAGDVATEAPEKRQANVNGDEPKISASERRRLRKAEQAAAKKDSKQQQQEGNSSPAVNNKAQKPEEELDPTQYFEKRCHLVQDLQRKGVPAYPHKFQVTLTIPEFIKMYGGLGDGEHLENEEVQIAGRISRVSASGQKLRFYDIRGDGEKIQVMSNFSYHDEKAGDFSEVHNRFRRGDVIGIRGFPGKSKRGELSIFPREVTLLSPCLHMLPERNSLKDFEVRFRHRYLDLMVNDETRKTFLIRSRIVNYLRRFLEDRGFVEVETPMMNVIAGGAAARPFKTHHNDLDMDLYMRIAPELFLKMLIVGGMDRVFEIGKNFRNEGIDMTHNPEFTACEF…	0	127.75	34	21	85	21	658	74.3	6.71	245	21	1.055	1.054	1.061	0.945	0.997	0.997	1.002	0.998	1.006	0.996	0.08	0.08	0.08	-0.08	0	0	0	0	0.01	-0.01	0.636278	0.659761	0.660087	0.585624	0.824441	0.860175	0.940539	0.882904	0.305117	0.87062	0.889498	0.902448	0.922119
FALSE	High	Master Protein	TGGT1_310010-t26_1-p1	transcript=TGGT1_310010-t26_1 | gene=TGGT1_310010 | organism=Toxoplasma_gondii_GT1 | gene_product=Sushi domain-containing protein [Source:UniProtKB/TrEMBL;Acc:S7UT16] | transcript_product=rhoptry neck protein RON1 | location=TGGT1_chrXI:969238-974493(+) | protein_length=1158 | sequence_SO=chromosome | SO=protein_coding_gene | is_pseudo=false	MARSSRAAPSGAFAHGVAKASFTWISGMKTPFGCVFFFCLIALWGFSAALRTSDIGVDALSVSSRAAANGSEGGVAQSEQERASDEQRNDSEAHDSVASSESSDAERKDDPPDNKSTSETPEAKLAGRDASNPPASSKSPTPSPAPTPAVSTSTTPAKSSADTSKDPKNKLSSARKEKRIGKKFKRHDEFLADAVIDKLDSMRSVQVSGALLRRIWKEHQRVGDDMRDLLREYILALERELYTQQAEVFGVEQLKMDDVIRHEHSSEARKREVELEMQALAEQHNFMKKLFGHIQANVEAKNTSALVNRIEELDKPIDIIDAIDKRSGSDVLHCLKVIGKSIRYMQESVKKFSRELKTLERLDAERPSGEAERIRETLGFVMDPLSGPLSSMDYESLSW…	0	127.72	37	32	82	32	1158	127.5	4.98	210.57	32	0.993	0.985	1.003	1.009	1.002	0.994	1.012	1.019	1.026	1.019	-0.01	-0.02	0	0.01	0	-0.01	0.02	0.03	0.04	0.03	0.740279	0.350594	0.802973	0.133514	0.947471	0.684888	0.480096	0.386088	0.253532	0.0318493	0.895477	0.902448	0.93478
FALSE	High	Master Protein	TGGT1_203780-t26_1-p1	transcript=TGGT1_203780-t26_1 | gene=TGGT1_203780 | organism=Toxoplasma_gondii_GT1 | gene_product=hypothetical protein | transcript_product=hypothetical protein | location=TGGT1_chrVIIa:2142786-2147213(+) | protein_length=1475 | sequence_SO=chromosome | SO=protein_coding_gene | is_pseudo=false	MAFPSPFFSGAVPSAAGGPERRPNTQRPIHRADPYAASLLGRLASKLASSVSSFFSSAPARKSPSVGVSTSSSHAVRLAPVRGSAPSPSLWGASELSADGEATGREVTVVRQPTSSRQSLAEVLNPSLWPRDNSFHSSLALPRQGEPACLHPGSDPAAQSHDVLTLSTSGAVHYLQSSSPPDMSDRAGTQWRRLDAVPASTSVSPNGDMQMGWQSQVADQTTFVPRAAPLYGDGVRGLQVHFPAAGDPLSNLEASASRLTQQQWLLQQGATGPQPVMEGTVIPTPAHTGYPPQSIERPVTVSSRAFSGYAIPGEPLAQPALRPTFNGHHTRVAPAASHSLFPTEERVASSLLAAGPIRRRGSEARATPASGPPVPVLRLHPRRDSRSAAGSLLRQEEHL…	0	127.67	23	23	40	23	1475	145.1	7.24	116.34	23	0.915	0.955	0.97	1.092	0.998	1.042	1.059	1.027	1.047	1.02	-0.13	-0.07	-0.04	0.13	0	0.06	0.08	0.04	0.07	0.03	0.207485	0.643933	0.756777	0.51997	0.98253	0.278398	0.183018	0.503611	0.0371495	0.733311	0.889498	0.902448	0.926621
FALSE	High	Master Protein	TGGT1_299810-t26_1-p1	transcript=TGGT1_299810-t26_1 | gene=TGGT1_299810 | organism=Toxoplasma_gondii_GT1 | gene_product=tRNA-synt_1e domain-containing protein [Source:UniProtKB/TrEMBL;Acc:S7UGP2] | transcript_product=cysteine-tRNA synthetase (CysRS) | location=TGGT1_chrXII:289809-302095(-) | protein_length=898 | sequence_SO=chromosome | SO=protein_coding_gene | is_pseudo=false	MRSPVLPQKSSVLRFLFLGCSLFLLFFSPCPRNRVSAFSLSDAVANCDRHEACSLRSPVAARFVCSRPLRSRPLTWTTRTRFPSSFLFLSPQTSFVRWDSAPKSAFVCMQGSPLLLRFPPRNASNRALRPAKPFALFHRTSCAFFSTHTCCSSAFLSLRNYCSTARNFHVSDSRRFSSSSASAPSGKPRNFRDTNGSSLSPRVQPSFAEKPSLKMATEERNGTACCGPAVGEHWEMPTKEGKLLTGLMVNNSMAGGKVEFVPQKGNRVCWYGCGPTVYDASHMGHARTYVTFDVIRRIMSDYLNYDVTMCMNITDIDDKIIKRSTEQGVDFLTLARHWEKEFFNDMTALNVRLPTVVTRVSEYIPEVVALIERIVKNGYGYESQGSVYFDTQTFRKNEK…	0	127.663	31	23	68	23	898	101.5	8.43	198.83	23	1.039	1.033	1.033	0.96	0.997	0.992	0.992	1.007	0.99	0.988	0.06	0.05	0.05	-0.06	0	-0.01	-0.01	0.01	-0.02	-0.02	0.614319	0.617437	0.712061	0.651665	0.864318	0.74194	0.0569792	0.813172	0.782305	0.0329966	0.889498	0.902448	0.922119
FALSE	High	Master Protein	TGGT1_243710-t26_1-p1	transcript=TGGT1_243710-t26_1 | gene=TGGT1_243710 | organism=Toxoplasma_gondii_GT1 | gene_product=T-complex protein beta subunit [Source:UniProtKB/TrEMBL;Acc:S7UFS3] | transcript_product=t-complex protein beta subunit | location=TGGT1_chrVI:2717493-2725570(+) | protein_length=568 | sequence_SO=chromosome | SO=protein_coding_gene | is_pseudo=false	MISEGGVPDVLQRGAQQDRGETARLQYFVGAIAVGELVKSTLGPKGLDKILTPMQGVEGGRNGRTIITNDGATILKSVWLDNPAAKILADVALQQDTVCGDGTTGVVVLASELLKQAEELVNQNIHPQIITAGYRKALAVARKRLQEISFGCEDDGLREYLMKVARTTLSSKLLTHEKEHFAKIAVDAILRLKEHASSLELVHIIKKPGGGLRDSFLDEGFILEKRIGTCQPKVQEDCRVMVANTPMDTDKIKIYGARVSVDSFEAVQALELAEKEKMKQKVDKIAAYGCNVFINRQLIYNYPEQIFQDHKVIAIEHADFDGMERLAAALGAEIISTFDAPDPSKLGYCKKMEEIMIGEDKVIRFSGCKRGEACTIVLRGGSEHGLEEAERSLHDALAI…	0	127.568	42	19	83	19	568	61.4	5.92	240.63	19	1.017	1.014	1.031	0.978	0.994	0.991	1.008	1.002	1.007	1.014	0.02	0.02	0.04	-0.03	-0.01	-0.01	0.01	0	0.01	0.02	0.725459	0.605868	0.169662	0.593864	0.441267	0.574327	0.782107	0.938906	0.109278	0.746386	0.894792	0.902448	0.922119
FALSE	High	Master Protein	TGGT1_305860-t26_1-p1	transcript=TGGT1_305860-t26_1 | gene=TGGT1_305860 | organism=Toxoplasma_gondii_GT1 | gene_product=Calcium-dependent protein kinase CDPK3 [Source:UniProtKB/TrEMBL;Acc:A0A125YQG3] | transcript_product=calcium-dependent protein kinase CDPK3 | location=TGGT1_chrIX:5409701-5417293(+) | protein_length=537 | sequence_SO=chromosome | SO=protein_coding_gene | is_pseudo=false	MGCVHSKNPHSKHAGAAGEKPDASLEKGGQSKGSAPSSGTGDSGKGTGSPDTKRDSMPMTPGMYITQQKAHLSDRYQRVKKLGSGAYGEVLLCKDKLTGAERAIKIIKKSSVTTTSNSGALLDEVAVLKQLDHPNIMKLYEFFEDKRNYYLVMEVYRGGELFDEIILRQKFSEVDAAVIMKQVLSGTTYLHKHNIVHRDLKPENLLLESKSRDALIKIVDFGLSAHFEVGGKMKERLGTAYYIAPEVLRKKYDEKCDVWSCGVILYILLCGYPPFGGQTDQEILKRVEKGKFSFDPPDWTQVSDEAKQLVKLMLTYEPSKRISAEEALNHPWIVKFCSQKHTDVGKHALTGALGNMKKFQSSQKLAQAAMLFMGSKLTTLEETKELTQIFRQLDNNGDG…	0	127.188	42	21	52	18	537	60.4	6.4	173.37	21	1.015	1.008	0.998	0.994	1.008	1.001	0.991	0.99	1.001	1.023	0.02	0.01	0	-0.01	0.01	0	-0.01	-0.01	0	0.03	0.0617645	0.317323	0.895497	0.441622	0.268614	0.483028	0.496043	0.820058	0.964872	0.589268	0.889498	0.902448	0.96237
FALSE	High	Master Protein	TGGT1_203980-t26_1-p1	transcript=TGGT1_203980-t26_1 | gene=TGGT1_203980 | organism=Toxoplasma_gondii_GT1 | gene_product=hypothetical protein | transcript_product=hypothetical protein | location=TGGT1_chrVIIa:1963789-1975923(+) | protein_length=1920 | sequence_SO=chromosome | SO=protein_coding_gene | is_pseudo=false	MQLQQAVRSGAGAPPSCQPGGCPDTSVSQPTLYNGESLASSVFPGPSPSADKAADLCIGTMQQTHFAGQASQMQAQPVHMLPQQVYMTPGASSPDLSSLPVFAQASSAPAPGAASTSPTGASPPGLVARAPPRRSRAERGRVAGPRNARPQEDIYKRTYSSVSRSSRRKGADASGDGGACLGFDGASETDMADASSMSGDSFPHSSGGGESETRPYGASLPATLDSGASASQRSNFDFHSGGSAAQNAGDEGASPHTRSGAGPAGQDGEAEQQEPSPSETGTGAGGAQGSGPSWKRRPTRRREGLRLRPLDDQEERVLPPDGKLYAYLLQRDKLAYNLWRKEVQRMSEETGGAGPGEGPQAPGATGAFAGAAVGGGRQRKRKEAASTVEPPRRLLRTLR…	0	126.762	19	27	47	27	1920	201.3	5.44	122.87	27	1.004	1.034	0.991	1.004	1.008	1.038	0.994	1.006	0.977	1.006	0.01	0.05	-0.01	0.01	0.01	0.05	-0.01	0.01	-0.03	0.01	0.91478	0.192679	0.725787	0.249508	0.839359	0.151619	0.811554	0.557399	0.268135	0.62933	0.963279	0.902448	0.922577
FALSE	High	Master Protein	TGGT1_243920-t26_1-p1	transcript=TGGT1_243920-t26_1 | gene=TGGT1_243920 | organism=Toxoplasma_gondii_GT1 | gene_product=MCM domain-containing protein [Source:UniProtKB/TrEMBL;Acc:A0A125YSK7] | transcript_product=putative DNA replication licensing factor MCM5 | location=TGGT1_chrVI:2796800-2806044(+) | protein_length=794 | sequence_SO=chromosome | SO=protein_coding_gene | is_pseudo=false	MEETPVYFNTSRLEEGGFSSSSPSALMLPSSLPSVQQMKFNFRQYLNHGGAELKRRLLAHAEKNERCLLHVDLNDLKVYQHHVSEADLKCVDTPYCKKKHHAAPPDFARQLVTGLRQRPLVYLPTCERVCEEVIEKSAILPPRQLAASLALGGTAGRHGRRGPVQVQINLMDTSATHTPIRHLLSRQQEQFVVTTGIIISSRPPASRLQTVTIQCRYCNHKMIISLPEWREQLQLPRFCLYSQQRAAVASTAGPASVLGGDAGDLADLGCRNKPDPYFMVTNECSFVDVQSLKLQELPEDVPTGDMPRHLLLNCTRLLTDQAFPGDRLIIHGVLTTNVATPAVRHTGSKETDQPHSSYLHVLGLQKVSFMSLARTRLSFTQTEQRDVFYKLAQSQNILD…	0	126.616	40	30	66	30	794	88.2	8.41	167.27	30	0.964	0.973	0.974	1.076	1.037	1.047	1.048	1.011	1.013	0.979	-0.05	-0.04	-0.04	0.11	0.05	0.07	0.07	0.02	0.02	-0.03	0.0371436	0.229575	0.180254	0.0953211	0.152088	0.00884611	0.0456802	0.604828	0.0460038	0.485564	0.889498	0.902448	0.922119
FALSE	High	Master Protein	TGGT1_235020-t26_1-p1	transcript=TGGT1_235020-t26_1 | gene=TGGT1_235020 | organism=Toxoplasma_gondii_GT1 | gene_product=WD_REPEATS_REGION domain-containing protein [Source:UniProtKB/TrEMBL;Acc:S7UVW7] | transcript_product=putative COPI protein | location=TGGT1_chrX:4501792-4518157(-) | protein_length=1256 | sequence_SO=chromosome | SO=protein_coding_gene | is_pseudo=false	MPLRVSLKKHFFARSERVKSVDFHPTEPFLLSALYDGRLQIHDYTTHALVKEIDASPLPLRTAKFIVKRQWMICGGDDCALRVFNIHTLEKVKEIPSAHGDYIRHISVHAAKPLVLSSSDDMTVKLWHYEKNWQKVASYEQHTHYVMQTQWHPRDPNLFASCSLDRTIKVWGIQVRSSSPSASDSSAAVVSAPHFTLTGHERGVNCIEYSKSGERPYLVSGSDDCTVRVWDYQTKQCIQVLSGHSRNVCSVLLTSLAGHVLPLLFSAGEDAQLFVWHALTYKKELSLDLNVERIWSLSLLDPSSAASASTSGSAGVASAAGATGSGAGGLGGLVLAIGSDSGTLVLKMGKEQPVASLHSGKAVVARGFEILQVNLRLLEEQQYQDGERLPVAYKELGQC…	0	125.502	26	28	56	28	1256	137	6.16	147.28	28	0.942	0.94	0.951	1.054	0.993	0.991	1.003	1.01	0.996	0.961	-0.09	-0.09	-0.07	0.08	-0.01	-0.01	0	0.01	-0.01	-0.06	0.557934	0.589128	0.641688	0.647989	0.693105	0.180777	0.73516	0.0822243	0.89723	0.469675	0.889498	0.902448	0.922119
FALSE	High	Master Protein	TGGT1_315270-t26_1-p1	transcript=TGGT1_315270-t26_1 | gene=TGGT1_315270 | organism=Toxoplasma_gondii_GT1 | gene_product=hypothetical protein | transcript_product=hypothetical protein | location=TGGT1_chrXI:4558433-4565813(-) | protein_length=780 | sequence_SO=chromosome | SO=protein_coding_gene | is_pseudo=false	MAPKKKGISVNLRDLQREMGVGVTLLPSAPKPVDEAALAAAEKERERERKLGPGGGRWADRMDDSDDDEWRRDGEGATFGPGGPGARSMEGMRREGGRMRQEVELPDEPWRRSAPLPSRDQEGGERIGRGRGVEEDADLGVLRSTAKANTPPAGGSGDLGRGGRGETAAIRQQEEDLDFAEVRKATPQREGSFPGHRAPREDDEDLDFAAVRDRTRGGMGSGAESVAPSSDSRPEHLRSLRSRLKKVERENVSPENGASPSPPSSRPLESQSALESKPGRYVPPSKRSPAVGKDEKGSAARGTSGASAPVQNDRLAAFLEPDSPRKEPATAPRPAAGGASVTGAAPGACTPSSSSPGEREVSAAFSSPGEKDDLQASSPETAKAGGGARFVPKWKQRME…	0	125.302	33	21	63	21	780	84.5	5.24	195.6	21	0.925	0.94	0.952	1.1	1.018	1.034	1.047	1.036	1.045	1.051	-0.11	-0.09	-0.07	0.14	0.03	0.05	0.07	0.05	0.06	0.07	0.57185	0.682112	0.712157	0.492875	0.141909	0.359258	0.11502	0.169725	0.00593569	0.211064	0.889498	0.902448	0.922119
FALSE	High	Master Protein	P60709	Actin, cytoplasmic 1 OS=Homo sapiens (Human) OX=9606 GN=ACTB PE=1 SV=1	MDDDIAALVVDNGSGMCKAGFAGDDAPRAVFPSIVGRPRHQGVMVGMGQKDSYVGDEAQSKRGILTLKYPIEHGIVTNWDDMEKIWHHTFYNELRVAPEEHPVLLTEAPLNPKANREKMTQIMFETFNTPAMYVAIQAVLSLYASGRTTGIVMDSGDGVTHTVPIYEGYALPHAILRLDLAGRDLTDYLMKILTERGYSFTTTAEREIVRDIKEKLCYVALDFEQEMATAASSSSLEKSYELPDGQVITIGNERFRCPEALFQPSFLGMESCGIHETTFNSIMKCDVDIRKDLYANTVLSGGTTMYPGIADRMQKEITALAPSTMKIKIIAPPERKYSVWIGGSILASLSTFQQMWISKQEYDESGPSIVHRKCF	0	125.081	38	12	140	3	375	41.7	5.48	427.98	12	1.052	1.097	1.013	0.953	1.002	1.045	0.965	1.055	1.056	0.991	0.07	0.13	0.02	-0.07	0	0.06	-0.05	0.08	0.08	-0.01	0.688565	0.613835	0.929696	0.66943	0.884745	0.530096	0.430131	0.400688	0.381511	0.884737	0.889498	0.902448	0.974293
FALSE	High	Master Protein	TGGT1_213392-t26_1-p1	transcript=TGGT1_213392-t26_1 | gene=TGGT1_213392 | organism=Toxoplasma_gondii_GT1 | gene_product=Surface antigen repeat-containing protein [Source:UniProtKB/TrEMBL;Acc:S7UP73] | transcript_product=surface antigen repeat-containing protein | location=TGGT1_chrV:850154-864700(+) | protein_length=2317 | sequence_SO=chromosome | SO=protein_coding_gene | is_pseudo=false	MSSGLWQIFKRKGKDGGEAETKATKAHMGEENKMYYNEKLKRWVVRGEEHLVEQEQLPPPPPTAAALQKPGNSDAGAALPSAGPRSFARGRTARSLYTATPGLSVRPAATSTAASLPKPAFVLPPFAASRLAVCPPSLSQEAQASSLPPGTSEEDRANAPPGSRDNVGERLGFDAAAKACGDAGSTDKTGQDSSLGESVLKGENLSEQQTPDPSLPVFSSSPVSASAGLSQAAAAGGARSRNHSGLDFEGGGSSDGVHLGGSTVSREPRSPCLSERKRTQPSCCEGQSDGQGIHVEGSGSSPCVAPETSIASPFGLPGDPASVSLSPPLPQSLSTPGPAQAPAAALMPSSPRLNADAFPADGDLSFPTAFVASQPADGAGQASSREETFSLHASGRPRG…	0	124.748	18	38	47	38	2317	253.3	4.93	114.32	38	0.917	0.95	0.932	1.074	0.985	1.02	1	1.024	0.986	0.989	-0.13	-0.07	-0.1	0.1	-0.02	0.03	0	0.03	-0.02	-0.02	0.481309	0.628801	0.521378	0.540329	0.0402814	0.104339	0.974804	0.25494	0.525602	0.646886	0.889498	0.902448	0.922119
FALSE	High	Master Protein	TGGT1_210840-t26_1-p1	transcript=TGGT1_210840-t26_1 | gene=TGGT1_210840 | organism=Toxoplasma_gondii_GT1 | gene_product=Arginyl-tRNA synthetase family protein [Source:UniProtKB/TrEMBL;Acc:S7UKP6] | transcript_product=arginyl-tRNA synthetase family protein | location=TGGT1_chrIV:1942834-1951568(-) | protein_length=595 | sequence_SO=chromosome | SO=protein_coding_gene | is_pseudo=false	MQALNVQVKEAFRRALAAAFPSVDHAPIITVSKFGDFQCNSAMALFKQKSKEELGVQSPKEAGEKIAAQLKDESLFSNVQASPQGFVTVDISGAWLCKDLKEILKQKGHLQVPHAEKKLRVMVDFSSPNVAKEMHVGHLRSTIIGESICRILAFHGHEVQRINHIGDWGTQFGMLIEYLHSQFPDYKANMPDISDLNAFYKKAKAAFDADEDFKTRSREMVVKLQGGDEAALESWRLICDVSRKEFEKVYKRLDVSLEERGESYYNAVLPKVVQELTDKGMVTVSDGAKCVFTKVSEVPLMAVKSDGGFGYDSTDLAAVRDRLVERRGDWLIYVTDLGQEEHFTKIFAAAEQAGWHLPPKTRLDHMGFGVVQGQDGKRFKTRSGEVVKLVDLLDEAKAR…	0	123.841	37	23	76	22	595	67	6.51	186.83	23	0.992	0.996	1.022	1.01	1.002	1.006	1.033	1.016	1.008	1.001	-0.01	-0.01	0.03	0.01	0	0.01	0.05	0.02	0.01	0	0.73131	0.700425	0.370653	0.291495	0.899072	0.239058	0.346417	0.147695	0.224557	0.941742	0.894792	0.903402	0.922119
FALSE	High	Master Protein	TGGT1_204050-t26_1-p1	transcript=TGGT1_204050-t26_1 | gene=TGGT1_204050 | organism=Toxoplasma_gondii_GT1 | gene_product=Peptidase_S8 domain-containing protein [Source:UniProtKB/TrEMBL;Acc:S7UVC6] | transcript_product=subtilisin SUB1 | location=TGGT1_chrVIIa:1932241-1938144(+) | protein_length=795 | sequence_SO=chromosome | SO=protein_coding_gene | is_pseudo=false	MGSSHAIVACAALIVLLSTNARGLRVRKDKDVLLATSFLSHHGEYQNPTSTYNLIKEIRKVEAEIEDEVETLNRDRRLHRGHNKYADDDIRQGLKDEQDMGASENIPVAELEPQDLDREAKYPVRMLIVDKRSDDDDDEETKTSFVETALHSDLAQRVVKELNGHVDVLRESGVVLVDLPAQTTDKQLQELIETARAQGTIVEPDHLVQSVNTSSKGSNDPLLDRLWGMDALNVKGAWDIITTGEPNMGSRRPLVCVLDTGIDYNHPDLRDNMEVNQAERDGTPGVDDDNNGEVDDIYGANMLSKENDPADDHSHGTHVAGTIGAHGNNGIGVAGVAWAPRLLPCKFLAYTGRGYSSDAVRCIDYCVKRGADIVNHSWGGSWPSEALREAVVRTANNGL…	0	123.703	36	21	58	21	795	85	5.39	145.16	21	1.267	1.21	1.242	0.921	1.168	1.115	1.144	0.999	0.984	1.093	0.34	0.28	0.31	-0.12	0.22	0.16	0.19	0	-0.02	0.13	0.449233	0.541372	0.494642	0.82481	0.329456	0.373311	0.330859	0.778275	0.108976	0.464304	0.889498	0.902448	0.922119
FALSE	High	Master Protein	TGGT1_244200-t26_1-p1	transcript=TGGT1_244200-t26_1 | gene=TGGT1_244200 | organism=Toxoplasma_gondii_GT1 | gene_product=Transket_pyr domain-containing protein [Source:UniProtKB/TrEMBL;Acc:S7UEM2] | transcript_product=putative 2-oxoglutarate dehydrogenase e1 component, mitochondrial precursor | location=TGGT1_chrVI:3022117-3029688(-) | protein_length=1116 | sequence_SO=chromosome | SO=protein_coding_gene | is_pseudo=fa…	MRSLRSFSTSRWTRGASLSHPTARRSPSASLSLSSSLLSPVVVSARESLLGSSRRSACGASRLLACDFASSRPTSAAALTGAPLASESFLTGTSAAYVEQMYNAWQRDPSSVHASWNAYFTNVVQDLPAGASFCLPPSAGVSSGLLGSTTAVGGAARGAPFISSAPGSLPAGASFVTPESLPVSPQQSVHDTSRLIQMVRGYQMRGHEIAAVNPLSLPQETPFVSGSRGPTPAGTLDFEAYGFTKADLDKVYDCRVDGMCGFLSPEFPPRPLRQIIQRLEEAYCGSVGVEYMHIGDRNVCNFIRQWIETPAKYGFTTDMKKKILARTARSQMFENFCGQKFSTSKRFGLDGCETMIVAMKAITKKAAREGVNSVVIGMPHRGRLNVLVNVLHKPMQQLL…	0	123.662	27	25	70	25	1116	124.2	7.11	204.65	25	0.961	0.993	0.991	1.009	0.97	1.002	1	0.994	1.011	0.986	-0.06	-0.01	-0.01	0.01	-0.04	0	0	-0.01	0.02	-0.02	0.210912	0.273675	0.689463	0.274728	0.190742	0.279265	0.996044	0.0117891	0.0425216	0.725297	0.889498	0.902448	0.922119
FALSE	High	Master Protein	TGGT1_231600-t26_1-p1	transcript=TGGT1_231600-t26_1 | gene=TGGT1_231600 | organism=Toxoplasma_gondii_GT1 | gene_product=HEAT repeat-containing protein [Source:UniProtKB/TrEMBL;Acc:A0A125YHR1] | transcript_product=HEAT repeat-containing protein | location=TGGT1_chrVIII:1475035-1486295(-) | protein_length=1169 | sequence_SO=chromosome | SO=protein_coding_gene | is_pseudo=false	MSAAGTPHPAMADLQLQLEQLLLASLDPAQVKPASEQLRTLLQQEQVEQRRLAYLLLAKQIVDGRQEEVRQLSAVLLRRKISKAMAVFDENQQKEFITSLVARFSQEPSASVRRAVVHLLASILRLATLQEAKRRELFSALSHMAMQNPSPGTDPQQLQQQVAAVSTFVAVAEACPDELVDYFDEFLTVFRHAFTCAAAGNELGTSALKGLRSLAEFAEEPDQQKKVCALVPNVMQIIAAAVQANEEDVATTGIQLIDDLLSNDNMAMKDGELLTVLDFLLKTVASRSDVDAGLRQQALSCIQWAAKQKPRVLCKSPTVVPAILDVLVAMGAEPDVQGGGPEDFEEDELTPHRIAAQCVDALAISLPSKYVFQPMLDRLTPFTQSTDILKKRAALVLLG…	0	122.746	23	22	53	22	1169	128	5.01	144.88	22	0.936	0.955	0.947	1.066	0.998	1.018	1.009	1.029	1	1.005	-0.1	-0.07	-0.08	0.09	0	0.03	0.01	0.04	0	0.01	0.571465	0.714468	0.672483	0.672448	0.952624	0.485921	0.672246	0.134338	0.993556	0.203408	0.889498	0.903474	0.922119
FALSE	High	Master Protein	TGGT1_249180-t26_1-p1	transcript=TGGT1_249180-t26_1 | gene=TGGT1_249180 | organism=Toxoplasma_gondii_GT1 | gene_product=Bifunctional dihydrofolate reductase-thymidylate synthase [Source:UniProtKB/TrEMBL;Acc:A0A125YXY2] | transcript_product=bifunctional dihydrofolate reductase-thymidylate synthase | location=TGGT1_chrXII:4294324-4300363(-) | protein_length=610 | sequence_SO=chromosome | SO=protein_coding_gene | is_pseu…	MQKPVCLVVAMTPKRGIGINNGLPWPHLTTDFKHFSRVTKTTPEEASRLNGWLPRKFAKTGDSGLPSPSVGKRFNAVVMGRKTWESMPRKFRPLVDRLNIVVSSSLKEEDIAAEKPQAEGQQRVRVCASLPAALSLLEEEYKDSVDQIFVVGGAGLYEAALSLGVASHLYITRVAREFPCDVFFPAFPGDDILSNKSTAAQAAAPAESVFVPFCPELGREKDNEATYRPIFISKTFSDNGVPYDFVVLEKRRKTDDAATAEPSNAMSSLTSTRETTPVHGLQAPSSAAAIAPVLAWMDEEDRKKREQKELIRAVPHVHFRGHEEFQYLDLIADIINNGRTMDDRTGVGVISKFGCTMRYSLDQAFPLLTTKRVFWKGVLEELLWFIRGDTNANHLSEKG…	0	122.583	40	22	54	22	610	68.7	7.24	153.71	22	1.015	1.013	1.035	0.976	0.991	0.989	1.01	1.014	1.016	1.02	0.02	0.02	0.05	-0.04	-0.01	-0.02	0.02	0.02	0.02	0.03	0.532254	0.683355	0.216229	0.522972	0.507488	0.135307	0.589961	0.222107	0.5569	0.355829	0.889498	0.902448	0.922119
FALSE	High	Master Protein	TGGT1_291960-t26_1-p1	transcript=TGGT1_291960-t26_1 | gene=TGGT1_291960 | organism=Toxoplasma_gondii_GT1 | gene_product=Kinase-like domain-containing protein [Source:UniProtKB/TrEMBL;Acc:S7UNX9] | transcript_product=rhoptry kinase family protein ROP40 (incomplete catalytic triad) | location=TGGT1_chrIX:4241532-4244563(+) | protein_length=525 | sequence_SO=chromosome | SO=protein_coding_gene | is_pseudo=false	MTPSTCCFGVLFQSFRGNSASASEESCLGGGHPDGTTATVFRPKTLQALGLATDSDSEPEGKGGYQRLTESTRRKKKATGRIASLFGRGRGKGDEEASGDEGASGGKEQPLGPPSGIPRRRRFWQKERVEPEDAVVRAFRRFLKYRVLDVETIEGTPSQLDRSSWTPSPPFFQPGEGSSKAVEYFVKQQTPALTDEMHKLMEVVDPVMPPGRPLQMSSPSSKRTTHFERGPMLMTDFFALTVDHQPFNMRIFPLPGGFEGEQKVEQYKKVMLNEQKVLSIFGVADGKKVSNAYHCYLPVEEVFFGKGQQVISLGPSLKMPSVVFLYPSASATLGQVAEAIKLAAQQQGTALVAQAAQLHITLQLIKLVAITTSKGILLRRLSLENFLLRGDGVVFLSGF…	0	122.552	39	17	79	17	525	57.9	7.43	230.39	17	1.081	1.084	1.087	0.917	0.991	0.994	0.997	0.988	0.992	1.001	0.11	0.12	0.12	-0.12	-0.01	-0.01	0	-0.02	-0.01	0	0.573907	0.560428	0.590355	0.551791	0.255886	0.408029	0.814514	0.305684	0.00112203	0.972281	0.889498	0.902448	0.922119
FALSE	High	Master Protein	TGGT1_235930-t26_1-p1	transcript=TGGT1_235930-t26_1 | gene=TGGT1_235930 | organism=Toxoplasma_gondii_GT1 | gene_product=Domain K-type RNA binding proteins family protein [Source:UniProtKB/TrEMBL;Acc:A0A125YQ53] | transcript_product=domain K- type RNA binding proteins family protein | location=TGGT1_chrX:5075263-5081044(+) | protein_length=570 | sequence_SO=chromosome | SO=protein_coding_gene | is_pseudo=false	MAQEEAEDVKMDRRSSRGPSGSRDGSRSRERSPRQDRSPPRDGELREDSGNGDDRRASSVGRRSRSRSYRSPRRSESRGSSRNGRRHSRSGSRSRDAPTRHPDGYWTDGKEAFILNIADEDASFILGSGGRTKRKLSHVCGADLNILERDGRTVLEIRGTPDTIDKAKLYIGFVMQQRVGPVALPPDAEKRDDLTIIHVPHECVGYVTGRKGAGLRSVEEEWNTLMFFTDLRSKEAGETEKLAIFGELRARRGSELKVMSAVEQKMPGYFIKDDEEHFSNNPEFDTDRIPIKLEDYSYALGQRGSTRKKLARASGAILEYVGRHAYIAGTLAERTRARQYLQWLCAQRTSYVHVETDGRDDCDVVSLPVDAVAYVTGSKGSNLRRAEEETGTFIFLDGS…	0	122.113	42	23	102	23	570	64.2	9.94	295.21	23	1.017	1.015	1.033	0.976	0.992	0.99	1.008	0.975	0.988	0.975	0.02	0.02	0.05	-0.03	-0.01	-0.01	0.01	-0.04	-0.02	-0.04	0.760932	0.777912	0.467527	0.646737	0.243611	0.0622531	0.573102	0.0359404	0.0137275	0.149835	0.89915	0.915919	0.922119
FALSE	High	Master Protein	TGGT1_293180-t26_1-p1	transcript=TGGT1_293180-t26_1 | gene=TGGT1_293180 | organism=Toxoplasma_gondii_GT1 | gene_product=ELFV_dehydrog domain-containing protein [Source:UniProtKB/TrEMBL;Acc:S7VXB8] | transcript_product=NADP-specific glutamate dehydrogenase | location=TGGT1_chrIa:124576-129868(-) | protein_length=578 | sequence_SO=chromosome | SO=protein_coding_gene | is_pseudo=false	MTIPTYADGSRCHGPQRGTVLSRRRSSEIRREQKQHTVLHTFVPSGDTAYFKSCGCIFNTPRLGHPHNWLVTCLVFRFLCYLVVAFSAKMITDKNLSVVTPPELVTDDPGDMPDCKISPRCQSEASEVADPEEVDAFVKQIETANRFQPEFLQAFHEVFDSVRPVLCSNPKYLRAFKVIVEPERCITFRVPWVDDQGKQHVSRGYRVQYSSAAGPYKGGLRFHPSVTLSVMKFLGFEQIFKNSLTGLSIGGAKGGSDFDPKGRSDNEVMRFCQAFMTELSRYIGPNRDVPAGDIGVGAREIGYLFGQYKLLKAGQFEGALTGKDKNWGGSAMRPEATGYGCVYFVLELLKAQNKEGIKGMRCAISGSGNVALYAGEKLATLGAKVMTFSDSSGYIVNEK…	0	122.031	40	20	74	20	578	63.8	8.18	190.29	20	1.064	1.063	1.045	0.939	0.998	0.998	0.98	0.993	0.993	1.007	0.09	0.09	0.06	-0.09	0	0	-0.03	-0.01	-0.01	0.01	0.556058	0.539188	0.683798	0.578426	0.851866	0.893903	0.0269141	0.675781	0.530614	0.143226	0.889498	0.902448	0.922119
FALSE	High	Master Protein	TGGT1_287500-t26_1-p1	transcript=TGGT1_287500-t26_1 | gene=TGGT1_287500 | organism=Toxoplasma_gondii_GT1 | gene_product=Putative T complex chaperonin [Source:UniProtKB/TrEMBL;Acc:S7UPG8] | transcript_product=putative T complex chaperonin | location=TGGT1_chrV:438209-443517(-) | protein_length=556 | sequence_SO=chromosome | SO=protein_coding_gene | is_pseudo=false	MFANRYGLSGLLKEGHRSFTGIDEVTAKNIDACKALTDLTRTSLGPNSLSKLVVTSLGKRIVTAHTSLIVKELEVQHPAAKMLAMAAEMQQQEFGGAVNLLLVFAGQLLAQAEYLLKQGLHPNDVARGYEMAVAKLPAFLEESVCYTLKSLNDEQALAEVLESTVATKPLCTEGRLHKLVAQAAAMVMPPNNPKDFDVENIRVAKLTGGRLSQSVVLKGMVVTRPPSGSVESKQNCKVMVLGCGLECSTTEAKGTVLVHNAEELKNFTKGEERQMEEIIKGIKDAGVEVIIVHGGAISDVAQHFCNKYDILTLKIQSKFETRRLCRALGATAVVRLGVPTPEELGSCLSITVSEISSKKVTNILTKDSRVCTVVLRGSTPSVLDEAERAIDDAANLVKA…	0	120.734	38	20	75	19	556	59.3	7.5	197.62	20	1.004	1.03	1.05	0.964	0.967	0.993	1.012	0.985	0.975	0.993	0.01	0.04	0.07	-0.05	-0.05	-0.01	0.02	-0.02	-0.04	-0.01	0.033746	0.363296	0.209225	0.0605606	0.0635674	0.719991	0.53971	0.57208	0.0866089	0.0641013	0.889498	0.902448	0.922119
FALSE	High	Master Protein	P08670	Vimentin OS=Homo sapiens (Human) OX=9606 GN=VIM PE=1 SV=4	MSTRSVSSSSYRRMFGGPGTASRPSSSRSYVTTSTRTYSLGSALRPSTSRSLYASSPGGVYATRSSAVRLRSSVPGVRLLQDSVDFSLADAINTEFKNTRTNEKVELQELNDRFANYIDKVRFLEQQNKILLAELEQLKGQGKSRLGDLYEEEMRELRRQVDQLTNDKARVEVERDNLAEDIMRLREKLQEEMLQREEAENTLQSFRQDVDNASLARLDLERKVESLQEEIAFLKKLHEEEIQELQAQIQEQHVQIDVDVSKPDLTAALRDVRQQYESVAAKNLQEAEEWYKSKFADLSEAANRNNDALRQAKQESTEYRRQVQSLTCEVDALKGTNESLERQMREMEENFAVEAANYQDTIGRLQDEIQNMKEEMARHLREYQDLLNVKMALDIEIAT…	0	120.6	55	26	74	25	466	53.6	5.12	171.29	26	0.927	0.918	0.876	1.156	1.072	1.062	1.013	1.064	1.063	1.11	-0.11	-0.12	-0.19	0.21	0.1	0.09	0.02	0.09	0.09	0.15	0.731932	0.67072	0.495148	0.503395	0.196439	0.0391638	0.575105	0.318147	0.302247	0.249258	0.894792	0.902448	0.922119
FALSE	High	Master Protein	TGGT1_321620-t26_1-p1	transcript=TGGT1_321620-t26_1 | gene=TGGT1_321620 | organism=Toxoplasma_gondii_GT1 | gene_product=Dynamin-related protein DRPB [Source:UniProtKB/TrEMBL;Acc:A0A125YT61] | transcript_product=dynamin-related protein DRPB | location=TGGT1_chrIb:1696372-1706596(+) | protein_length=860 | sequence_SO=chromosome | SO=protein_coding_gene | is_pseudo=false	MDGKREDVSARPPAVSAPGDGEKSMTNGVKVESQMYQQLRKLINVVDELRDVGLQQFIQLPRICVVGTQSAGKSSVLEAIVGLDFLPRGDGVVTRRPLELRLVHLSEAEHDLNEAYAVFENDKERKIRDFEQVRQEIDRLTDQVAGKNKGIIDSPIVLTIYATQCPDLSLIDLPGITRVPLKGSDQCEDIEMLTRQMALRYASDPRTIILAVIPANVDMSTSDALQMSRRVDPRGVRTIGVITKIDLMDRGTDAAKMLMGEEIPLRLGYTGVRNRSQADIREGKSVRECLEEEKTFFATHPTYRLLPPHLVGVHSLVDKLTKVLFRHIKNFLPEIKREISSKTRVVLDRLQELGEGVPMEPSERAQLLWTAITDYVEIFKNTIRGKYDKRLQMYFEHQK…	0	120.421	31	25	80	25	860	95.9	6.3	198.99	25	0.97	0.986	0.981	1.021	0.99	1.007	1.002	0.993	1.004	0.957	-0.04	-0.02	-0.03	0.03	-0.01	0.01	0	-0.01	0.01	-0.06	0.0771225	0.0055714	0.411705	0.15233	0.0916806	0.39403	0.947539	0.574343	0.799625	0.4668	0.889498	0.902448	0.922119
FALSE	High	Master Protein	TGGT1_273520-t26_1-p1	transcript=TGGT1_273520-t26_1 | gene=TGGT1_273520 | organism=Toxoplasma_gondii_GT1 | gene_product=Eukaryotic translation initiation factor 3 subunit E [Source:UniProtKB/TrEMBL;Acc:A0A125YQR1] | transcript_product=PCI domain-containing protein | location=TGGT1_chrVIII:3416534-3423842(+) | protein_length=601 | sequence_SO=chromosome | SO=protein_coding_gene | is_pseudo=false	MVSDSNMANGAAPSQGGLGLIKLMSPYWDSHMSIPVMDWMLSNEMITPEEREQMGQSLLGQAATTPAGRAAVEAEIREIEAKLVNFNNAIEAYKKEQQKRIGGYPDRKTLVDLSEWWMTNSGQSPAPPALELGVDALVPRLAKLYYDIGDYKQSLQQLQYMLTTLYELLAEGTNTQTRMACYWGVCACIILLHHQQQSENKSAASEETEKKEAAQDEELLQTLDHGEDEEGDAARAALAEAAKKAAVETHTAAQCILKLGDILDQVAAASSKKDHQGNPPLPAGLTMSREQQLLNRSWLLHWSVWPLFRYYFLMVHTKQFIPRNQAWSLMLEWVLHEGNLSCVTVVCPHLLRYYAVYAILNRKRKDHFQAVITAIGQGKNRYSDPFTSLLEALFLDFNF…	0	120.28	36	20	63	20	601	67.3	6.73	176.21	20	1.009	1.024	1.001	0.997	1.006	1.021	0.998	0.991	0.988	0.981	0.01	0.03	0	0	0.01	0.03	0	-0.01	-0.02	-0.03	0.78474	0.0345804	0.971322	0.932785	0.141841	0.576662	0.674101	0.0667049	0.369504	0.623047	0.905112	0.902448	0.990747
FALSE	High	Master Protein	TGGT1_280490-t26_1-p1	transcript=TGGT1_280490-t26_1 | gene=TGGT1_280490 | organism=Toxoplasma_gondii_GT1 | gene_product=U-box domain-containing protein [Source:UniProtKB/TrEMBL;Acc:S7UUM0] | transcript_product=U-box domain-containing protein | location=TGGT1_chrVIIa:332194-348045(-) | protein_length=1089 | sequence_SO=chromosome | SO=protein_coding_gene | is_pseudo=false	MQDSPQSSAAACGAAATIGPAKEDHFLQLVLRLTVDATTASTPHCQLYYLKRYAEELTREGKPLKLARADLETILIKRIQDAAKEGTPNVFRFLADCFHRANDEVYSKGLPAALRPGVVQELQRQLVDYSVLLLSCPELFELGDPPPYAMLGEQLTQFVEMGCPLSFFARMVDTLVQQGTETGEDFLGRWFTPTIKSLSERLNLHSMTEYKSAPLNALKFLSSQKAVARLMADPAILLPEFPRRFPVTKPGLFYQENSLLGRLLAQTLLDGPTLKNGRQESLSMKYFAGNQALTTQYLQATVQTLRHDEQNHQEVFLQIVKNLCRGGSDCRHRVVQWYGQILGSNELRAKMSHMLRMTQQQAAESLDPMHSMLLKVQGQTSYGFTLNAFWSLLGLAEPI…	0	120.27	23	23	53	23	1089	121.9	6.2	138.48	23	0.983	1.015	1.022	0.991	0.974	1.006	1.013	1.009	1.011	1.04	-0.02	0.02	0.03	-0.01	-0.04	0.01	0.02	0.01	0.02	0.06	0.570021	0.748146	0.780724	0.413129	0.523954	0.873156	0.8514	0.191449	0.298766	0.328084	0.889498	0.909311	0.930759
FALSE	High	Master Protein	TGGT1_232340-t26_1-p1	transcript=TGGT1_232340-t26_1 | gene=TGGT1_232340 | organism=Toxoplasma_gondii_GT1 | gene_product=PPM-type phosphatase domain-containing protein [Source:UniProtKB/TrEMBL;Acc:S7WBN1] | transcript_product=protein phosphatase 2C domain-containing protein | location=TGGT1_chrVIII:2014510-2019343(-) | protein_length=547 | sequence_SO=chromosome | SO=protein_coding_gene | is_pseudo=false	MGAYLAKPKTQKVSEEGGEEGRTITCFGAASMQGWRQTMEDAHIATPSLRTASPAAAKTLEELAQSGSRECKEALPAFAQDMSLYAVFDGHASNAVSCWVSDHYTKVFLDRLEQIEADAKKGVSPAGLAESLSRQLPDESIFSLRNAVLCEALQQSFLDVDEQMKREDNRQELKKYFEQGQLEQRDNETYIQRYLNDGGDVRLVEMDGQKYLQFVPRTSEDEEDGEGASREKAEGDGQDETEKEATAKEEASGAVNGEEKRTAEAETVNKLTRLNSTKIEEEDSEKKPESEEEKDTEKEKEEETEKEEEDKAGERPLFAHPSTPEGSGATAVVVLVVGGEDPVIITANAGDSRGVICRGGKAFPLSHDHKPTNPDEKKRIVAAGGYVTNGRVDGNLNLS…	0	120.238	49	27	72	27	547	60	4.65	184.55	27	0.936	0.942	0.955	1.066	0.998	1.005	1.018	0.988	0.993	0.995	-0.09	-0.09	-0.07	0.09	0	0.01	0.03	-0.02	-0.01	-0.01	0.353182	0.404618	0.330445	0.346048	0.54728	0.5234	0.383499	0.113146	0.523102	0.557872	0.889498	0.902448	0.922119
FALSE	High	Master Protein	TGGT1_309120-t26_1-p1	transcript=TGGT1_309120-t26_1 | gene=TGGT1_309120 | organism=Toxoplasma_gondii_GT1 | gene_product=Ribos_L4_asso_C domain-containing protein [Source:UniProtKB/TrEMBL;Acc:A0A125YTR1] | transcript_product=ribosomal protein RPL4 | location=TGGT1_chrXI:476484-477734(-) | protein_length=416 | sequence_SO=chromosome | SO=protein_coding_gene | is_pseudo=false	MATARPLVSVYKPEDGTASGTSLMPSVFLSPLRPDLVRFVHTNMAKNRRQPYGVAPNAGYQTSAESWGTGRAVSRIPRVPGGGTHRAGQAAFGNMCRGGGMFAPNKTWRRWHRKVNVTQKRHAVASAVAATGLPALVMARGHRIDEVPELPLVVSEKLEKVSKTREAVKILETLGCTAELERVRASAKKLRAGKGKMRGRRTHMRRGPLVVYAEDNGVTRAFRNIPGVELCKVDSLNLLQLAPGGALGRFCLYTASAFKRLQLLFGRHTGTGTAQLKKGYHLPRALMSNADLSRIVNSEEIQRVVRPARVAPQKKRGQKKNLLKNHAVLCRVNPAARNLKILARLAQTEGTKQRALVLRKKQANREEHKKHRQSARRFAAEIRQAFSDKMAAELEAAAR…	0	120.193	46	18	92	18	416	45.7	11.18	238.76	18	1.01	0.987	1.006	1.006	1.017	0.994	1.012	1.003	0.991	0.987	0.02	-0.02	0.01	0.01	0.02	-0.01	0.02	0	-0.01	-0.02	0.584329	0.512592	0.531525	0.334995	0.511527	0.765578	0.442086	0.859799	0.0372042	0.571694	0.889498	0.902448	0.922119
FALSE	High	Master Protein	TGGT1_214970-t26_1-p1	transcript=TGGT1_214970-t26_1 | gene=TGGT1_214970 | organism=Toxoplasma_gondii_GT1 | gene_product=DNA helicase [Source:UniProtKB/TrEMBL;Acc:S7W5U3] | transcript_product=putative DNA replication licensing factor | location=TGGT1_chrX:6526260-6536268(+) | protein_length=1049 | sequence_SO=chromosome | SO=protein_coding_gene | is_pseudo=false	MSTNRASGLDRSPLRRTEEDSEADVNADGERGVVLSEVEEEDDQGRLRGGVLDENVDYFQGSRELDLEERRAEEEAEKIIDEENTEDLVFGMRDDEREREAFLAAGMDADAFDASLIDDEDLDDLDPHLEEKARRAAERHLDARENEARRKRRGDKAAKGDIWAQLLEEDDEGASEMDRVLRRVEERRRRFFSGTGMGGRGSEQINLHDLNEAKKLLTESNPALVPFGEQHQQAMDTLFKYFLYKFNLHAFRRVQHGGVGEEEEGEKRDDEKALYYLDRIQDMIREDRATILVDTRHLIFFSDQLVKWIEAYPLPALQVMNDVITVEAEASCPSLYSTRICSVILTDWPYKEELRQLRCTHLNSLISVSGVVTRRSSVLPKMRLLYLKCSNCLNSITDV…	0	120.146	28	27	54	27	1049	117.2	5.62	156.22	27	0.945	0.961	0.958	1.107	1.046	1.064	1.061	1.001	1.024	0.97	-0.08	-0.06	-0.06	0.15	0.06	0.09	0.09	0	0.03	-0.04	0.373848	0.5333	0.563264	0.275426	0.126498	0.0267981	0.0530834	0.973866	0.11537	0.373663	0.889498	0.902448	0.922119
FALSE	High	Master Protein	TGGT1_314100-t26_1-p1	transcript=TGGT1_314100-t26_1 | gene=TGGT1_314100 | organism=Toxoplasma_gondii_GT1 | gene_product=TPR_REGION domain-containing protein [Source:UniProtKB/TrEMBL;Acc:S7W2F0] | transcript_product=tetratricopeptide repeat-containing protein | location=TGGT1_chrXI:3881643-3887836(+) | protein_length=580 | sequence_SO=chromosome | SO=protein_coding_gene | is_pseudo=false	MEANTSENSKLSESPVANAEESRVEDAAMSDSLSSVQTDDEKAKDEDEETVDGTPEERMTLALSCKDAGNDVFKSGDVSAAKAKYTEGLKQLKDLDFPDAKRLRVALNSNVAMCCIKTQEWSAAIAAANAVLQEEPENVKALYRRGVARSAFGFYAEAKADLLQVARLDPKNADARKELEKVKERIAKHNAEKKKAFSGLFDRAAGMYADREEQMRQKRLQEEEEEKRRQEMWEKEMEERREKGEEEISFADWKEERRKVEEEKKDKQRREQTSSPSSSPSTTASSGRTSKKTGGVESLELDEEDEKIINETKKMGYCYFRRDLTEEEKKLNAQHRPTRIEPAANAASSGASAGSSPVASNAENSAGGAAKQSGVSSWNSAGTTYEEKDVSEWAKKRFE…	0	119.927	43	25	70	25	580	64.2	5.38	179.76	25	1.059	1.046	1.052	0.949	1.005	0.993	0.999	1.001	0.985	0.99	0.08	0.07	0.07	-0.07	0.01	-0.01	0	0	-0.02	-0.01	0.519374	0.667525	0.619751	0.586454	0.639959	0.64252	0.863749	0.988683	0.407734	0.223536	0.889498	0.902448	0.922119
FALSE	High	Master Protein	TGGT1_222860-t26_1-p1	transcript=TGGT1_222860-t26_1 | gene=TGGT1_222860 | organism=Toxoplasma_gondii_GT1 | gene_product=Eukaryotic translation initiation factor 3 subunit B [Source:UniProtKB/TrEMBL;Acc:A0A125YS98] | transcript_product=putative eukaryotic translation initiation factor | location=TGGT1_chrII:1241196-1252687(-) | protein_length=756 | sequence_SO=chromosome | SO=protein_coding_gene | is_pseudo=false	MVRIDKDDLPAEEQDLLEFLSEDSDEGEDDDSEQGEEKLKEKLSQMEPLLQMDYSFPSTIVLVGVPKVGKDKHEKLRLVLDKKMGEELLKKGAESVNEGLTISMPVNEETGMTKGFCFVTFSNQFNAQHAAHHLNGWALDAKHTFRAALLDDFDEIVGRGANYRPPIKLLGFTRENFRWWLLDARGREQFVIRYAGETEIYWHDPIERDCSVLVYNGHRERADGKRVWTDFRVQWSPQGSFLATFHRPGIALWAGDQFEKKVRFEHKDVKQIDFSPNETYVITWDGSPAQLRNEKAVRIWKVMTGELLRQFPTPAYSPRGGEYPHFLFSHDDRYVARMGEKELCVYQMECDDEPEAEGEKSDEKGRKDRCAVRLLRDPRDGKLSSLKYPLEKFEWSPTE…	0	119.887	36	24	71	24	756	88.3	5.5	200.38	24	1.045	1.056	1.058	0.928	0.97	0.98	0.982	0.959	0.975	0.95	0.06	0.08	0.08	-0.11	-0.04	-0.03	-0.03	-0.06	-0.04	-0.07	0.69483	0.65245	0.673978	0.544659	0.0302246	0.104263	0.432558	0.216521	0.101896	0.347372	0.889498	0.902448	0.922119
FALSE	High	Master Protein	TGGT1_249900-t26_1-p1	transcript=TGGT1_249900-t26_1 | gene=TGGT1_249900 | organism=Toxoplasma_gondii_GT1 | gene_product=Putative adenine nucleotide translocator [Source:UniProtKB/TrEMBL;Acc:A0A125YLS5] | transcript_product=putative adenine nucleotide translocator | location=TGGT1_chrXII:4873424-4874380(+) | protein_length=318 | sequence_SO=chromosome | SO=protein_coding_gene | is_pseudo=false	MAAPTVSAGGKEKKGNADSQLMNTAKDFLAGGISAGVSKTIVAPIERVKMLIQTQDSIPEIKEGKIPRYTGIVDCFRRVSAEQGVASLWRGNMANVIRYFPTQAFNFAFKDTFKRMFPRYDQKKEFWKFFCTNVASGGLAGASSLVIVYPLDFARTRLASDVGKGNEREFTGLVDCLGKIFRRTGFFSLYQGFGVSVQGIIVYRGAYFGLFDTAKAMLFGPNNDANLFYKWAVAQTVTAAAGVASYPFDTVRRRMMMMAGRKKGEQEIQYTGTADCWKKVYQQEGFKGFFKGAWANVLRGAGGALVLVFYDELKKMLM	0	119.869	47	16	92	16	318	35.2	9.74	256.62	16	1.029	1.032	1.03	0.97	0.998	1.001	1	1.017	1.019	1.009	0.04	0.05	0.04	-0.04	0	0	0	0.02	0.03	0.01	0.577444	0.585971	0.620778	0.384819	0.934954	0.965492	0.992757	0.170383	0.335101	0.816998	0.889498	0.902448	0.922119
FALSE	High	Master Protein	TGGT1_313380-t26_1-p1	transcript=TGGT1_313380-t26_1 | gene=TGGT1_313380 | organism=Toxoplasma_gondii_GT1 | gene_product=hypothetical protein | transcript_product=hypothetical protein | location=TGGT1_chrXI:3292372-3294103(+) | protein_length=274 | sequence_SO=chromosome | SO=protein_coding_gene | is_pseudo=false	MGQKLTVEERRNIKREVYMIYPGLEQQLEMAFTCHDLQHEGKLPYTTLEPIIRHLLMQYGLIEYVTRFSDSEGCLDANQIRAELNEFGVNTGGLCCGSSLTLEDFKSLAVIWLRKILDCHADDQAVWMAKLKAEQEEQAEAYTRAMREFQDTFTQQHALYQQGLQEQQKQINDWNKLLEDAQKTQQTIYEQEVRRMEEARLKEATAAEEAMKEQIDLISQYKEKLEKIAAADTSGKCFVYPAAATPYGACASAGAQEPTRRRRVKKEHPSRACC	0	119.832	50	13	82	13	274	31.5	5.58	240.58	13	1.151	1.137	1.14	0.878	1.011	0.999	1.001	0.993	0.988	1	0.2	0.19	0.19	-0.19	0.02	0	0	-0.01	-0.02	0	0.529156	0.530888	0.549031	0.52906	0.530256	0.294652	0.935469	0.838475	0.411606	0.892104	0.889498	0.902448	0.922119
FALSE	High	Master Protein	TGGT1_206670-t26_1-p1	transcript=TGGT1_206670-t26_1 | gene=TGGT1_206670 | organism=Toxoplasma_gondii_GT1 | gene_product=hypothetical protein | transcript_product=hypothetical protein | location=TGGT1_chrVIIa:705099-714174(-) | protein_length=2072 | sequence_SO=chromosome | SO=protein_coding_gene | is_pseudo=false	MEEEEAPPEGRETPCGGAGELKFESAVVHASVLESEGGEDREEEEREVEYGTGLHEGRLSPGQDQGEVLDEGGDADFADPEDEEKLDFSNEEPRDEGELSLDAQPLSGGEEELEGAQEDAGLDGGDGDPESTSGDAEPPPHSQEEASSTLPDTGEGRDGGFLRGSKRRARSSASSPRSVVSAERVSAALAEIANLCEPDSDEEGEISEDEVPFCRVTPQNPSFRSRTLEFLNLPPNLTHIALQEALSRVGEVEEVVSSRFASGQPDAGQGSDSSRRRASWLVRFRRADDAAAVRKSFDGKVFGKCMVQVLFARDTSRNAQNRRDNNLLSPDGASGKRQLGKGAAGANAGNVQNLRGRQSPPAPGASGPGTGAQGPGVGGAVAGCMGPGSGAGGGPPPVG…	0	119.766	18	32	54	32	2072	218.3	5.41	126.23	32	0.905	0.903	0.917	1.106	1.001	0.999	1.014	1	0.987	0.973	-0.14	-0.15	-0.13	0.15	0	0	0.02	0	-0.02	-0.04	0.580747	0.550097	0.625259	0.508774	0.971091	0.947668	0.681205	0.995346	0.700515	0.300255	0.889498	0.902448	0.922119
FALSE	High	Master Protein	TGGT1_269190-t26_1-p1	transcript=TGGT1_269190-t26_1 | gene=TGGT1_269190 | organism=Toxoplasma_gondii_GT1 | gene_product=Gp_dh_N domain-containing protein [Source:UniProtKB/TrEMBL;Acc:S7WDK9] | transcript_product=glyceraldehyde-3-phosphate dehydrogenase GAPDH2 | location=TGGT1_chrVIII:6001367-6005276(-) | protein_length=995 | sequence_SO=chromosome | SO=protein_coding_gene | is_pseudo=false	MSLYPRSSVRLRTRGLFFSSSLPLSHCLFLALFLFLSLDNFLPTSRSLNSFSVPAAALRLDGRDGPRQQTPETFSSSAFAEPSPESTPGACPLSSNDGELSLQQAEALLREEQTLATEYAQRAAGDVQQFTAAAQEAAARGDMSAAKELAAAAAASAAEAEDLAAYAQAVGETDPAVLRERAKEEAERFEQEERRQRGGDAASSGTCSESSDAAFAPEFSDLRDLFFGACDATVSPDDLPSVPEALEKLAGLESDVQARGDQLDEKEKVVAEYLVAAQEAAVRHEEASRAFEDAKRNKKENLAAAAEKAALEAAAEYADLTTAAQLVTEEAEQESAKALADAVAAGDLRFAINQKIVNEAGPEARGKVPRALLAPKHVRISDPAAGRVLKIFFHNNFAP…	0	119.64	28	23	70	22	995	105.1	5.05	192.41	23	1.01	1.013	1.017	0.996	1.005	1.009	1.012	1.029	1.022	0.995	0.01	0.02	0.02	-0.01	0.01	0.01	0.02	0.04	0.03	-0.01	0.633359	0.630902	0.200311	0.743627	0.444708	0.536681	0.248145	0.0298712	0.243317	0.885931	0.889498	0.902448	0.922119
FALSE	High	Master Protein	TGGT1_311240-t26_1-p1	transcript=TGGT1_311240-t26_1 | gene=TGGT1_311240 | organism=Toxoplasma_gondii_GT1 | gene_product=Putative DnaJ family chaperone [Source:UniProtKB/TrEMBL;Acc:S7UT35] | transcript_product=putative DnaJ family chaperone | location=TGGT1_chrXI:1865804-1870827(-) | protein_length=426 | sequence_SO=chromosome | SO=protein_coding_gene | is_pseudo=false	MYFGSFPFGDDMRGPGPRRGGSKEKNNTKFYEILEVDRTASVADIKKSYRKLAIKHHPDKGGDPEKFKEISRAYEVLSDPEKRRIYDDHGEEGLENGGAGADPTDIFDLFFGGGRRASRQPSKKKGEDIVSAMKVTLEQMYSGATKRMAINKDVLCKQCNGVGGPADALTTCHDCDGHGVKVVTRQIGPMIQQTQSVCPACKGAGKSMDPSKRCKSCTGKGVVKERKILEIYIEKGAKNHHKVIFRGDADERPNEIPGDVIFILEQQEHAVFKRRGNDLFMTKKISLLESLCGFKFVLTHLDGRQLLIQSPPGTVTKPDAVQIIKGEGMPQQKNPFLKGDLFIVFEVEFPEHVSDADAKSLSQILPKPTEAVMVSEDDPHVEVHVAEPVDPDELRNRQQ…	0	119.389	36	14	71	14	426	47.4	6.84	192.13	14	1.065	1.055	1.061	0.966	1.029	1.019	1.025	1.016	1.016	1.003	0.09	0.08	0.09	-0.05	0.04	0.03	0.04	0.02	0.02	0	0.416007	0.42438	0.391945	0.556137	0.159872	0.0389163	0.0223797	0.0728431	0.564421	0.708868	0.889498	0.902448	0.922119
FALSE	High	Master Protein	TGGT1_209950-t26_1-p1	transcript=TGGT1_209950-t26_1 | gene=TGGT1_209950 | organism=Toxoplasma_gondii_GT1 | gene_product=Thioredoxin domain-containing protein [Source:UniProtKB/TrEMBL;Acc:A0A125YJX1] | transcript_product=putative thioredoxin | location=TGGT1_chrIb:1585569-1589285(-) | protein_length=424 | sequence_SO=chromosome | SO=protein_coding_gene | is_pseudo=false	MAPLRVCAFLPLVCFAFLSLAAGAKIRIDPMTHDVALVTQQNWDGKVQKFRAHQVFAVLFYKDGCSECQSLLDGEFNTLAKKMKGMVGVLAVDCGESAKLCTDQNVSSYPTILIFPPLPLPPYKFEGTPTYASLSKAVGPLIPSSVIIPTDMKDFEKAMATHVQVPKVLVFSDKPKASVLLKALSTAFKDKLHLVMINAEKLPEVVKKYRVTKFPHIVVTRKDKKDEAYKGEFNFQVLFDWLNVFSETFVLGGGFSDHTPKAEPSPETQPWKFQVIPELTKRSNVDLCFKKSLKALCVIYLKQGRELTAEETDMLEALKYQYDSGKGPDFRFMFMDVDTETGFRDLFAMESYPSVVVFNPHLKTRFTKLDADEHLSKESIASLLDKISSGNARFKVVPS…	0	118.782	52	20	93	20	424	47.7	8.34	223.89	20	1.044	1.051	1.046	0.958	0.999	1.006	1.002	1.003	1.014	1.013	0.06	0.07	0.07	-0.06	0	0.01	0	0	0.02	0.02	0.464506	0.529781	0.435636	0.454565	0.38872	0.776064	0.179213	0.700497	0.184517	0.111002	0.889498	0.902448	0.922119
FALSE	High	Master Protein	TGGT1_266640-t26_1-p1	transcript=TGGT1_266640-t26_1 | gene=TGGT1_266640 | organism=Toxoplasma_gondii_GT1 | gene_product=Acetyl-coenzyme A synthetase [Source:UniProtKB/TrEMBL;Acc:S7UHB7] | transcript_product=putative Acetyl-coenzyme A synthetase 2 | location=TGGT1_chrIX:887254-895827(+) | protein_length=714 | sequence_SO=chromosome | SO=protein_coding_gene | is_pseudo=false	MEKDRNTMEGGAEHVERGRCGGSAMEKDDECQYTPSTSPPVEVAEEATDDVEKISSSLPVNERYKVPRQNQTRCQIHDKETYEHMYWRSLHDADSFWREQATEILRWTAPFTKVFHGRMEDGNVSWFLNGKLNVCDNCVDRWAEKFPNRVALICEGDDPDQSRTITYRKLLRKVCQFANMLKRLGVRKGDVVSIYLPMGPEIVYAMLACARIGAVHNVIFAGFAASSLAERIHDAESHILITADQSSRGGKTIFLKDIADEAMAICPQVRHLVVFRCKGEPLKNWVEGRDIWGNELMSQMQPYCPLEVMDSEDPLFILYTSGSTGKPKGLCHSTAGYLLYAALTHKCVFDYHPGDIYACVADCGWITGHSYVVYGPLCNGATTLLFQSIPTYPDPGRYW…	0	117.656	38	22	76	22	714	79.9	6.89	236.26	22	0.917	0.941	0.948	1.058	0.969	0.995	1.002	1.01	1	0.983	-0.13	-0.09	-0.08	0.08	-0.05	-0.01	0	0.01	0	-0.02	0.345273	0.374419	0.404818	0.429837	0.154598	0.442573	0.722043	0.457042	0.979799	0.588414	0.889498	0.902448	0.922119
FALSE	High	Master Protein	Q07065	Cytoskeleton-associated protein 4 OS=Homo sapiens (Human) OX=9606 GN=CKAP4 PE=1 SV=2	MPSAKQRGSKGGHGAASPSEKGAHPSGGADDVAKKPPPAPQQPPPPPAPHPQQHPQQHPQNQAHGKGGHRGGGGGGGKSSSSSSASAAAAAAAASSSASCSRRLGRALNFLFYLALVAAAAFSGWCVHHVLEEVQQVRRSHQDFSRQREELGQGLQGVEQKVQSLQATFGTFESILRSSQHKQDLTEKAVKQGESEVSRISEVLQKLQNEILKDLSDGIHVVKDARERDFTSLENTVEERLTELTKSINDNIAIFTEVQKRSQKEINDMKAKVASLEESEGNKQDLKALKEAVKEIQTSAKSREWDMEALRSTLQTMESDIYTEVRELVSLKQEQQAFKEAADTERLALQALTEKLLRSEESVSRLPEEIRRLEEELRQLKSDSHGPKEDGGFRHSEAF…	0	117.329	44	27	67	27	602	66	5.92	178.11	27	0.94	0.932	0.955	1.1	1.034	1.025	1.05	1.074	1.07	1.103	-0.09	-0.1	-0.07	0.14	0.05	0.04	0.07	0.1	0.1	0.14	0.587572	0.537666	0.653481	0.471294	0.103962	0.186744	0.127175	0.119479	0.148604	0.049282	0.889498	0.902448	0.922119
FALSE	High	Master Protein	TGGT1_221670-t26_1-p1	transcript=TGGT1_221670-t26_1 | gene=TGGT1_221670 | organism=Toxoplasma_gondii_GT1 | gene_product=Transcriptional elongation factor FACT140 [Source:UniProtKB/TrEMBL;Acc:S7ULL0] | transcript_product=transcriptional elongation factor FACT140 | location=TGGT1_chrII:521099-534404(-) | protein_length=1198 | sequence_SO=chromosome | SO=protein_coding_gene | is_pseudo=false	MASSEEGAPPIEAKMEMKREPDAEPPSVPAASLAAPEEKVVPNGASPTVPVKTQEAKEEGRGGARTVAIDGGDVKEKLDRLFSYWDSCYGVEGDSWHGVDAFVILVGKASEEEEGKAEQMQMWLTGFQFPETLFVFTRTGEWWVLTSPKKLEHLRQVESCREGIFLLSRADGLPEAMEKIHQAIGRAAAAAGKNADEASIGCLQQSASLSQGGGFGQQVSDSLLRKFTESNRSKFVDDGIVATMAVHTRVEIENIRSASVVCVAMVKTQIVNRIETVLDNEQQESHAAIADLAEKLLKDGKQIEKLREKRNIDPSEVDLLYSNVQSGDVFDLRASAQPTNANLSQSEGSIIVSLGVKYKELCAAVARTLLLNGTKEQKEVYSFTFELLNYVISLLKPGA…	0	117.172	25	24	47	24	1198	134.5	5.21	136	24	0.977	0.961	1.017	1.029	1.006	0.99	1.046	1.006	1.014	1.02	-0.03	-0.06	0.02	0.04	0.01	-0.02	0.07	0.01	0.02	0.03	0.300672	0.371007	0.184933	0.615323	0.876733	0.632131	0.509845	0.879037	0.694933	0.71259	0.889498	0.902448	0.922119
FALSE	High	Master Protein	TGGT1_232710-t26_1-p1	transcript=TGGT1_232710-t26_1 | gene=TGGT1_232710 | organism=Toxoplasma_gondii_GT1 | gene_product=40S ribosomal protein S3a [Source:UniProtKB/TrEMBL;Acc:A0A125YZM8] | transcript_product=ribosomal protein RPS3A | location=TGGT1_chrVIII:2231374-2232762(+) | protein_length=259 | sequence_SO=chromosome | SO=protein_coding_gene | is_pseudo=false	MAIGKNKRMSKGKKGGKKKIGDPFLKKEWYDLKAPTLFNVRNFGKTLVTKSQGTKLAVDGLRGRVYEVNLADLNNDEDQGFRKIKLCCEDIQGRNCLTDFHGMDMTRDKICSLVRKCHSLIEAFVDVTTLDGYTLRMFCIAFTKRRPEQVKSTCYAQTSQIRAIRKKMMTIMSAEASKCQLRDLVKKFIPESIGKDIENACKGIFPLQNVFIRKVKMLKKPKFDLTKLMELHGEAEDVGRKVQAESGEAQNTLTAETKA	0	116.895	50	14	98	14	259	29.4	9.57	299.95	14	1.041	1.045	1.043	0.962	1.001	1.005	1.003	1.011	1	1.01	0.06	0.06	0.06	-0.06	0	0.01	0	0.02	0	0.01	0.644624	0.615341	0.596511	0.607726	0.961209	0.665429	0.367545	0.517903	0.97081	0.242723	0.889498	0.902448	0.922119
FALSE	High	Master Protein	P35580	Myosin-10 OS=Homo sapiens (Human) OX=9606 GN=MYH10 PE=1 SV=3	MAQRTGLEDPERYLFVDRAVIYNPATQADWTAKKLVWIPSERHGFEAASIKEERGDEVMVELAENGKKAMVNKDDIQKMNPPKFSKVEDMAELTCLNEASVLHNLKDRYYSGLIYTYSGLFCVVINPYKNLPIYSENIIEMYRGKKRHEMPPHIYAISESAYRCMLQDREDQSILCTGESGAGKTENTKKVIQYLAHVASSHKGRKDHNIPGELERQLLQANPILESFGNAKTVKNDNSSRFGKFIRINFDVTGYIVGANIETYLLEKSRAVRQAKDERTFHIFYQLLSGAGEHLKSDLLLEGFNNYRFLSNGYIPIPGQQDKDNFQETMEAMHIMGFSHEEILSMLKVVSSVLQFGNISFKKERNTDQASMPENTVAQKLCHLLGMNVMEFTRAILTP…	0	116.248	18	38	58	24	1976	228.9	5.54	138.61	38	0.937	1.004	0.962	1.096	1.026	1.1	1.055	1.088	1.035	1.104	-0.09	0.01	-0.06	0.13	0.04	0.14	0.08	0.12	0.05	0.14	0.510587	0.973703	0.792256	0.599471	0.73152	0.16536	0.146255	0.0705203	0.527373	0.27463	0.889498	0.989906	0.93338
FALSE	High	Master Protein	TGGT1_290640-t26_1-p1	transcript=TGGT1_290640-t26_1 | gene=TGGT1_290640 | organism=Toxoplasma_gondii_GT1 | gene_product=DNA mismatch repair protein [Source:UniProtKB/TrEMBL;Acc:S7UQA4] | transcript_product=putative DNA mismatch repair protein MSH6-1 | location=TGGT1_chrIX:3604395-3616262(-) | protein_length=1561 | sequence_SO=chromosome | SO=protein_coding_gene | is_pseudo=false	MSPQLTKAAPASARSGGARRSGGSIYETAGKKQASILSFFSRQPPASASAPASGKAPERRDASSEKATEETSQAASAGAAAAKNAKEEMSTRKVRRFSEGVFCKRQDDEDAPRGAVGSPEKNKDAVQKTEMRNNTTEPAEDEKKRQRASVGDSTAARSSSGNEEDPGSEDVRKLKRLRRRLALSDDEEKMETPPSIRRRRQAEQTKKVEKEAARRAKPEEEEEEEEDEEEEEESEPSAFSDESYEDESEEESEDDSEDEEEEEEEEEEEEEEEEEEEEEEEVRGKKRPAPKKEKRVEEGSQTTWTTAASSASSSSRAKLKDLVYSASSEKPGTTSSLTPPPVTSPPSSSPPAAPEPTSSSSSLSSSLSSSSVSSSSVSSSSVSSSSVSSSSRLPCSTGR…	0	116.096	22	31	47	31	1561	171.9	5.26	134.16	31	0.964	0.962	0.939	1.047	1.009	1.007	0.983	1.008	0.97	1.006	-0.05	-0.06	-0.09	0.07	0.01	0.01	-0.02	0.01	-0.04	0.01	0.65994	0.445113	0.35808	0.67842	0.739039	0.907281	0.759615	0.724031	0.198401	0.659966	0.889498	0.902448	0.922119
FALSE	High	Master Protein	TGGT1_232440-t26_1-p1	transcript=TGGT1_232440-t26_1 | gene=TGGT1_232440 | organism=Toxoplasma_gondii_GT1 | gene_product=Brf1p family coiled coil protein [Source:UniProtKB/TrEMBL;Acc:A0A125YMJ3] | transcript_product=Brf1p family coiled coil protein | location=TGGT1_chrVIII:2091405-2096025(+) | protein_length=468 | sequence_SO=chromosome | SO=protein_coding_gene | is_pseudo=false	MANATEKASPAGKKDHKEKLAPVPKPNDKEFKDRIEAETRAIDELKAKINDLQQRITSVVGGRDEYNRKKQEMRSRLDELQAQMDKYEAERKRLTEAIDSRQKEGWEMKQNVQDMKRKLGFSSTEEIDKRIAALEHSMMTSTLTLKEEKKLLDQIKQLKHNKPLVGKFAGLEAGASSFEETSVYPLRAMLDEARTKLLELRALKREEQEKYFALVKQRQEATAPGRELIEERDRLSKQMSEHMIKRREIQDEYKKENWKYQAFLAQQRQERNEKMREERARRQIEQERANLERQLEMVDEEPVDGELILLTQTIAYVQKIMDEHNQTQDGSPGTEQKKTPEAPKGDGMALLPKSQREEEYFFAPKGGKKKTEGGKKAKPKNIKHDIGTLLYFEQCGVAA…	0	116.086	39	20	82	20	468	54	6.62	215.91	20	1.069	1.051	1.067	0.95	1.016	0.999	1.014	1.011	0.98	0.998	0.1	0.07	0.09	-0.07	0.02	0	0.02	0.02	-0.03	0	0.550496	0.617784	0.509234	0.586567	0.398487	0.859104	0.0331862	0.522195	0.0312914	0.0471004	0.889498	0.902448	0.922119
FALSE	High	Master Protein	TGGT1_320570-t26_1-p1	transcript=TGGT1_320570-t26_1 | gene=TGGT1_320570 | organism=Toxoplasma_gondii_GT1 | gene_product=Tr-type G domain-containing protein [Source:UniProtKB/TrEMBL;Acc:S7UJX2] | transcript_product=putative elongation factor Tu | location=TGGT1_chrIV:197431-203338(+) | protein_length=586 | sequence_SO=chromosome | SO=protein_coding_gene | is_pseudo=false	MSGFVFNPNASVFVPGGVSSAPPPPPPASEDPARALSCPAAQAPAASLGTAPKAMTTASVPTVKEVTEQMEHLQVQQKESCWSDEADDRVEDTGFPANEEKAAETAPAASAAAAQQPAGSPEGVMSKAQVREAAAAAANKKNPPDSRPHLNIVFIGHVDAGKSTTCGNILYLTGGVDERTIEKYEKEAKEKNRESWFLAFVMDTNEEERQKGKTVEVGRAFFSTPNRRFTLLDAPGHKAFVPNMIEGAAQADIGVLIISARKGEFETGFEKGGQTREHALLAKTLGVNQLVIAVNKMDEPTCGWSQARFEEIEKKLTPFLKSCGFNPAKDIFFIPISGLHGQNLKDHVSRPGTKAYDARASWYGTDRPSLFELFDSVPLPDRKADDPLRVPILDGYKDG…	0	116.031	40	24	72	24	586	63.5	6.05	182.34	24	1.067	1.05	1.057	0.959	1.023	1.007	1.014	1.021	1.007	1.031	0.09	0.07	0.08	-0.06	0.03	0.01	0.02	0.03	0.01	0.04	0.462676	0.539954	0.531306	0.727226	0.619847	0.874568	0.733263	0.591647	0.828889	0.578301	0.889498	0.902448	0.922119
FALSE	High	Master Protein	TGGT1_269290-t26_1-p1	transcript=TGGT1_269290-t26_1 | gene=TGGT1_269290 | organism=Toxoplasma_gondii_GT1 | gene_product=hypothetical protein | transcript_product=hypothetical protein | location=TGGT1_chrVIII:5927256-5944753(-) | protein_length=4668 | sequence_SO=chromosome | SO=protein_coding_gene | is_pseudo=false	MASSGGGLFGNSSQPTSSNLFGGGSATTGSLSAKPAMTNAHAAPGSSLLTATPAAPANAASGTTQALSGQQGISASSSSGSSSTCGVSGFSPPKSAWGGRQFERLYTEVISPMVQKGDTWPSARQLRERLAELQSAALAAASSDAPISGAEVRTQASAPPRGSAQKRSTGSTRRDGTLSQEEDYVASLEEEQATVRAQLDALLTFQRSALQRILLFQDAFVKILTVPERQVSVSSAQLEQFARESYPGWERLCKDIDQLSQLHNLDQYMCFSLAFDAVQILQETNPSSGALSLFSLSSATQARDGAQKFGNGDVIWDPQLILAALHREQHFHLLCLFHLAIALYAEDSLGVYGDVDNVCNPVAVSVFTRLARRGFVENLLDRIGTLVSTLVCPPLLPSA…	0	115.759	10	37	42	37	4668	503	6.64	87.42	37	0.927	0.926	0.932	1.107	1.026	1.025	1.031	1.024	1.062	1.006	-0.11	-0.11	-0.1	0.15	0.04	0.04	0.04	0.03	0.09	0.01	0.536042	0.68089	0.617798	0.499677	0.364399	0.635753	0.0358923	0.318115	0.057768	0.248214	0.889498	0.902448	0.922119
FALSE	High	Master Protein	TGGT1_203310-t26_1-p1	transcript=TGGT1_203310-t26_1 | gene=TGGT1_203310 | organism=Toxoplasma_gondii_GT1 | gene_product=Dense granule protein GRA7 [Source:UniProtKB/TrEMBL;Acc:A0A125YVB8] | transcript_product=dense granule protein GRA7 | location=TGGT1_chrVIIa:2502941-2503651(+) | protein_length=236 | sequence_SO=chromosome | SO=protein_coding_gene | is_pseudo=false	MARHAIFSALCVLGLVAAALPQFATAATASDDELMSRIRNSDFFDGQAPVDSLRPTNAGVDSKGTDDHLTTSMDKASVESQLPRREPLETEPDEQEEVHFRKRGVRSDAEVTDDNIYEEHTDRKVVPRKSEGKRSFKDLLKKLALPAVGMGASYFAADRLVPELTEEQQRGDEPLTTGQNVGTVLGFAALAAAAAFLGMGLTRTYRHFSPRKNRSRQPALEQEVPESGEDGEDARQ	0	115.664	55	12	79	12	236	25.8	5.22	247.87	12	1.175	1.108	1.133	0.921	1.082	1.02	1.044	1.05	0.992	1.015	0.23	0.15	0.18	-0.12	0.11	0.03	0.06	0.07	-0.01	0.02	0.454052	0.480582	0.360322	0.69936	0.174818	0.810737	0.694338	0.450156	0.382399	0.63801	0.889498	0.902448	0.922119
FALSE	High	Master Protein	TGGT1_321650-t26_1-p1	transcript=TGGT1_321650-t26_1 | gene=TGGT1_321650 | organism=Toxoplasma_gondii_GT1 | gene_product=Protein kinase domain-containing protein [Source:UniProtKB/TrEMBL;Acc:S7VRX1] | transcript_product=hypothetical protein | location=TGGT1_chrIb:1657484-1670398(+) | protein_length=1375 | sequence_SO=chromosome | SO=protein_coding_gene | is_pseudo=false	MLPRMQSERSVARQSLGATRSRCLLRFATKKWASRGLGSSNRPGRPPPSSAAGHRASCPFFPRSSFSASFALRFLCPVLCSLLLATLFFVSPREVDALKFRGNGGRHLNAELDGNWAKRFQETQRAAPPDSFFVSDSEISGRTSLLSLASSEQGTSTVDSRFVGLSGQKPRHIWGSQEETGERREDRQEESEGRRGNEDAYHPHTFSHSSSSMPFYGALFDSSSAFPPFSAAVSSPPFSMTVSPADRVIQALPIAFAEHKSGGEKASREETGGKKDDQALSFLGDTKSASELNPPRLVCPDKPPTLPPREEQVRKAYALPLCELPWDDLGPMLGSGTFGRVYPLRRPACTEVTKGFVGRKFAVKIFWLKRKGMMNLFDTISQGGTPSAEQTDPGTIAAI…	0	115.247	21	27	59	27	1375	153.4	8.66	133.64	27	0.913	0.928	0.949	1.09	0.996	1.012	1.034	1.021	1.006	1.007	-0.13	-0.11	-0.08	0.12	-0.01	0.02	0.05	0.03	0.01	0.01	0.403678	0.422586	0.57045	0.435319	0.437354	0.506437	0.0844804	0.0437381	0.77628	0.798094	0.889498	0.902448	0.922119
FALSE	High	Master Protein	TGGT1_263060-t26_1-p1	transcript=TGGT1_263060-t26_1 | gene=TGGT1_263060 | organism=Toxoplasma_gondii_GT1 | gene_product=RPN2_C domain-containing protein [Source:UniProtKB/TrEMBL;Acc:S7UY70] | transcript_product=Proteasome/cyclosome repeat-containing protein | location=TGGT1_chrVIIb:808221-820240(-) | protein_length=988 | sequence_SO=chromosome | SO=protein_coding_gene | is_pseudo=false	AASAALNDAVEGVVRRLLEVCTEHGEGASYALGIAFDARRLDLVESILNSPRAIALPPTQPNSKCQLMLYCLDHVQTLISSKYFRSQIISLLTAEFEKCLPVYASGDAESTQKLSAEEQAEVRGLLFSGLCRCLVEQDASGRVAEILHQLLQESSGAEGLLMASQIAFDILQMENQSFQQALLDHPLLRAPEAPAGDPENSGESGERSTANGDAPAPDAEKKEENKEEKKEETKAEKKDPEEETEAEKKKKLLRSILSGEAQTAFSNQFLQRENHTDLMLLDLYKRSIDTRSSLLHHGVVLSHMLMQAGTSCDVFLRCNLDWMARANNWARFSATASLGVIHKGHVRDSMKLLRTYLPASASSAASSSPYSEGGAFYALGLISANQPSTSVRDYLLEQL…	0	115.075	26	22	52	22	988	107.1	5.25	129.18	22	1.03	1.038	1.047	0.969	0.998	1.006	1.014	1.015	0.998	1.009	0.04	0.05	0.07	-0.05	0	0.01	0.02	0.02	0	0.01	0.702325	0.556061	0.59974	0.679159	0.122892	0.740757	0.236451	0.394536	0.926838	0.400172	0.889498	0.902448	0.922119
FALSE	High	Master Protein	P15144	Aminopeptidase N OS=Homo sapiens (Human) OX=9606 GN=ANPEP PE=1 SV=4	MAKGFYISKSLGILGILLGVAAVCTIIALSVVYSQEKNKNANSSPVASTTPSASATTNPASATTLDQSKAWNRYRLPNTLKPDSYRVTLRPYLTPNDRGLYVFKGSSTVRFTCKEATDVIIIHSKKLNYTLSQGHRVVLRGVGGSQPPDIDKTELVEPTEYLVVHLKGSLVKDSQYEMDSEFEGELADDLAGFYRSEYMEGNVRKVVATTQMQAADARKSFPCFDEPAMKAEFNITLIHPKDLTALSNMLPKGPSTPLPEDPNWNVTEFHTTPKMSTYLLAFIVSEFDYVEKQASNGVLIRIWARPSAIAAGHGDYALNVTGPILNFFAGHYDTPYPLPKSDQIGLPDFNAGAMENWGLVTYRENSLLFDPLSSSSSNKERVVTVIAHELAHQWFGNLV…	0	114.878	27	24	68	24	967	109.5	5.48	173.79	24	0.822	0.841	0.843	1.202	0.987	1.01	1.013	1.042	1.049	1.024	-0.28	-0.25	-0.25	0.27	-0.02	0.01	0.02	0.06	0.07	0.03	0.516206	0.601392	0.604926	0.606589	0.846331	0.679086	0.627035	0.378377	0.0256999	0.36518	0.889498	0.902448	0.922119
FALSE	High	Master Protein	TGGT1_224850-t26_1-p1	transcript=TGGT1_224850-t26_1 | gene=TGGT1_224850 | organism=Toxoplasma_gondii_GT1 | gene_product=Polyadenylate-binding protein [Source:UniProtKB/TrEMBL;Acc:S7UWI4] | transcript_product=putative polyadenylate binding protein | location=TGGT1_chrX:2687512-2689821(+) | protein_length=769 | sequence_SO=chromosome | SO=protein_coding_gene | is_pseudo=false	MATASPVVAPSSPASAPSQPSPMPASNAGADVPASGTGGHQAAADHTAGNANVSGGVSGTTPAPAGQRPNGGMNAGAANFVSPSLYVGDLHQDVTEAMLFEVFNSVGPVTSIRVCRDTVTRRSLGYAYVNYQGIQDAERSLDTLNYTVIKGQPCRIMWCHRDPSLRKSGNGNIFVKNLDKNIDNKALYDTFSLFGNILSCKVAVDDNGHSKGYGFVHYENEESARSAIDKVNGMLIGGKTVYVGPFIRRAERDNLAEAKYTNVYIKNMPSAWEDESRLRETFSKFGSITSLVVRKDPKGRLFAFCNFADHDSAKAAVEALNGKRVTDAGAIKEGEDSGAEEEKEEEGQKREGDQILFVGPHQSKAHRSAMLRAKFEQMNQDRNDRFQGVNLYIKNMDDS…	0	114.824	30	23	87	23	769	82.6	8.84	205.93	23	1.102	1.102	1.113	0.905	0.997	0.997	1.007	0.985	1.006	0.994	0.14	0.14	0.15	-0.14	0	0	0.01	-0.02	0.01	-0.01	0.490964	0.503561	0.442372	0.501485	0.733585	0.417943	0.629506	0.331532	0.58705	0.428797	0.889498	0.902448	0.922119
FALSE	High	Master Protein	TGGT1_214490-t26_1-p1	transcript=TGGT1_214490-t26_1 | gene=TGGT1_214490 | organism=Toxoplasma_gondii_GT1 | gene_product=Peptidase M16 inactive domain-containing protein [Source:UniProtKB/TrEMBL;Acc:S7W5N7] | transcript_product=peptidase M16 inactive domain-containing protein | location=TGGT1_chrX:6200575-6209880(-) | protein_length=1353 | sequence_SO=chromosome | SO=protein_coding_gene | is_pseudo=false	MALSPQESPASSEVVDLSAVVSPAAVSGAGEDAALRPATPSVCTPCCVCRGSAKAEGEGGNSAEALGFQLVQHFSLKTICIREWKCMQTGVRVLLCRIASPLCNLYATLPTEAHTDEGLPHTLEHLVFLGSRRFPYKGVLDFLANRCLSQGTNAWTATDHTTYTLTTAGSEGLLNLLPVYLDHLMIPTLHDNAFKTEVHHLTQNAGSAGVVYSEMEARERQASSVLYRKLVELVYPGDSGYRYETGGLMEQIRRTSNARVREYHKNFYKWSNLSLIVTGLVEATSLLDTVRRSIKQIEEAKTLPAPPALSACPELDAQIAKAVGPPEHGERPLAFSGERPWTDDRNVRLPASPSSPQSSSPAFHRVYFPADDAESGRVALAWRGPAWKDALGREVVDIL…	0	114.224	23	31	71	31	1353	148.8	5.33	168.32	31	1.01	0.969	1.009	1.02	1.029	0.988	1.028	1.026	1.001	0.986	0.01	-0.04	0.01	0.03	0.04	-0.02	0.04	0.04	0	-0.02	0.692893	0.483667	0.875124	0.700605	0.385676	0.411313	0.0988212	0.180833	0.961314	0.740227	0.889498	0.902448	0.955348
FALSE	High	Master Protein	TGGT1_297500-t26_1-p1	transcript=TGGT1_297500-t26_1 | gene=TGGT1_297500 | organism=Toxoplasma_gondii_GT1 | gene_product=T-complex protein 1 subunit eta [Source:UniProtKB/TrEMBL;Acc:S7UKY6] | transcript_product=T-complex protein 1 eta subunit | location=TGGT1_chrII:1806900-1814443(-) | protein_length=546 | sequence_SO=chromosome | SO=protein_coding_gene | is_pseudo=false	MSHLLNAPIILLKDGVDTSQGRGQIISNINACQVIADIVRSTLGPRGMDKLIHSENGVTISNDGATVVSLLNVVHPAAALLVDIAKAQDDEVGDGTTSVVLLAGEFLESAKTFIEGGMAPQILINGYRTACQLAIEKIRELKVDLSSTPPHEKRVLLERCAQTTLNSKLVSGHKDFFAKMVVDAVSMLDDSLDKEMIGVKKVTGGSYTDSFVVQGVAFAKTFSYAGFEQQPKRFENAKILLLNLELELKAEKENAEVRLKTPDEYQAIIDAEWDIIYEKLDKISATGAQVVLSRLPIGDLATQYFADRDIFCAGRVDEGDMKRTARATGAKIQTTVNSITPDVLGTCGVFEERQIGGERFNLFMHCPQTQSATIVLRGGAPQFLDEADRSLNDAVMIVR…	0	114.129	50	21	48	21	546	59.4	5.96	135.03	21	0.995	0.991	1.009	0.979	0.975	0.97	0.988	1.012	0.981	1.009	-0.01	-0.01	0.01	-0.03	-0.04	-0.04	-0.02	0.02	-0.03	0.01	0.84246	0.586885	0.841358	0.45777	0.0115698	0.127754	0.603543	0.738375	0.596473	0.827684	0.93028	0.902448	0.944814
FALSE	High	Master Protein	TGGT1_271810-t26_1-p1	transcript=TGGT1_271810-t26_1 | gene=TGGT1_271810 | organism=Toxoplasma_gondii_GT1 | gene_product=Putative lanp [Source:UniProtKB/TrEMBL;Acc:S7V3U0] | transcript_product=putative lanp | location=TGGT1_chrVIII:4346960-4348612(-) | protein_length=283 | sequence_SO=chromosome | SO=protein_coding_gene | is_pseudo=false	MESAIRERVEHWFAKRGNGEVEEANGAASSASDEEMMKAAGEEMVELILDGRQFKSVSHEASDLLQKLQVLGKFTCNQTGLHSVEGFPVMPSVKTLELTDNHISGGLEALVKSFPNLKRLQLGGNYFRTFEVLEPLKDLCNLEHLGLDMSPISNQSEYRQKVFEMFPRLVVLDSTDKDGKEVEAADSDEEDEEEYDDDEEADTTLKDFYEKDLEDDDEEDEDDFNPDGEEEEDEDFDEEEEEDRLEGEEACEGAEGELEGKKRKNDAGEDENEAVKHARLGDL	0	114.032	86	17	52	17	283	32	4.23	142.68	17	1.1	1.082	1.074	0.95	1.045	1.029	1.021	1.042	1.009	1.022	0.14	0.11	0.1	-0.07	0.06	0.04	0.03	0.06	0.01	0.03	0.382686	0.22027	0.247502	0.409523	0.349939	0.210749	0.253891	0.000893618	0.720393	0.344014	0.889498	0.902448	0.922119
FALSE	High	Master Protein	TGGT1_236040-t26_1-p1	transcript=TGGT1_236040-t26_1 | gene=TGGT1_236040 | organism=Toxoplasma_gondii_GT1 | gene_product=Fructose-bisphosphate aldolase [Source:UniProtKB/TrEMBL;Acc:A0A125YGE5] | transcript_product=fructose-1,6-bisphosphate aldolase | location=TGGT1_chrX:5139351-5141389(+) | protein_length=433 | sequence_SO=chromosome | SO=protein_coding_gene | is_pseudo=false	MLCIVERIAMPTRGVNPSAANGKLPPRTRSATGCRVYIHPMVKFISLLFAVFYARFFLLFCVRIQSTFPTMSGYGLPISQEVAKELAENARKIAAPGKGILAADESTGTIKKRFDSIGVENTEANRAFYRDLLFSTKGLGQYISGAILFEETLYQKSPSGVPMVDLLKAEGIIPGIKVDKGLETLPLTDDEKATMGLDGLSERCKKYYEAGARFAKWRAVLSIDPAKGKPTNLSITEVAHGLARYAAICQANRLVPIVEPEILTDGSHDITVCAEVTERVLAAVFKALNDHHVLLEGALLKPNMVTHGSDCPKPASHEEIAFYTVRSLKRTVPPALPGVMFLSGGQSEEDASLNLNEMNKMGPHPFQLSFSYGRALQASCLKAWKGVPENKAKAQQVLM…	0	113.924	40	20	120	20	433	46.9	8.82	312.38	20	1.154	1.151	1.149	0.855	0.987	0.984	0.983	0.991	0.995	0.994	0.21	0.2	0.2	-0.23	-0.02	-0.02	-0.02	-0.01	-0.01	-0.01	0.525054	0.551507	0.562845	0.471655	0.44973	0.594964	0.633177	0.666756	0.819434	0.597092	0.889498	0.902448	0.922119
FALSE	High	Master Protein	TGGT1_273370-t26_1-p1	transcript=TGGT1_273370-t26_1 | gene=TGGT1_273370 | organism=Toxoplasma_gondii_GT1 | gene_product=Coatomer subunit gamma [Source:UniProtKB/TrEMBL;Acc:S7V3E5] | transcript_product=putative coatomer gamma 2-subunit protein | location=TGGT1_chrVIII:3554530-3558659(-) | protein_length=1044 | sequence_SO=chromosome | SO=protein_coding_gene | is_pseudo=false	MLSASSLRSKLQNLNVDLSKFSGSSSEKPQFTPYDCDKAKVLQEARAFSESPLNPKKCSQIITKILYLLSSNADPLTSAETSTVFFGVTRLFQSSDERLRRLIYMLLKELSVQTAEGFIVTSSLTKDMTSNSDRHRGNAVRVLSRIVDAAMVSQIERYLKTAIVDKNPFVASSGLVAGINLFHTAPEVVRRWVSEAHSCIFQHENAPVVQAHALVLLHAIKSSDRLALHKSLCELLQRFQRNPLAECLLIRYVKDLLLQDLSAGDASSPAYAYAAPPSLGAGGASDPSHQRLLLDYLESCLRHKHEMAMFEAARALCELAGAAADRGDAGTVFQSYDLSGALTVLQILLTSPKPVVRFAAVHVINKQAQKPRLASVLARCNAELEPLLSDPNRSIATAA…	0	113.828	29	28	59	28	1044	112.2	5.35	146.74	28	0.949	0.939	0.938	1.067	1.013	1.002	1.001	1.024	1.035	1.015	-0.08	-0.09	-0.09	0.09	0.02	0	0	0.03	0.05	0.02	0.415953	0.404529	0.101457	0.352733	0.0129634	0.810102	0.970236	0.0859874	0.0371762	0.548481	0.889498	0.902448	0.922119
FALSE	High	Master Protein	TGGT1_208030-t26_1-p1	transcript=TGGT1_208030-t26_1 | gene=TGGT1_208030 | organism=Toxoplasma_gondii_GT1 | gene_product=Microneme protein MIC4 [Source:UniProtKB/TrEMBL;Acc:A0A125YP10] | transcript_product=microneme protein MIC4 | location=TGGT1_chrIb:547335-549077(+) | protein_length=580 | sequence_SO=chromosome | SO=protein_coding_gene | is_pseudo=false	MRASLPVHLVVCTQLSAVWFGVAKAHGGHRLEPHVPGFLQGFTDITPAGDDVSANVTSSEPAKLDLSCVHSDNKGSRAPTIGEPVPDVSLEQCAAQCKAVDGCTHFTYNDDSKMCHVKEGKPDLYDLTGGKTASRSCDRSCFEQHVSYEGAPDVMTAMVTSQSADCQAACAADPSCEIFTYNEHDQKCTFKGRGFSAFKERGVLGVTSGPKQFCDEGGKLTQEEMEDQISGCIQLSDVGSMTADLEEPMEADSVGACMERCRCDGRCTHFTFNDNTRMCYLKGDKMQLYSSPGDRTGPKSCDSSCFSNGVSYVDDPATDVETVFEISHPIYCQVICAANPLCTVFQWYASEAKCVVKRKGFYKHRKTGVTGVTVGPREFCDFGGSIRDREEADAVGSDD…	0	113.553	41	19	107	19	580	63	5.22	283.67	19	1.161	1.164	1.143	0.888	1.031	1.034	1.015	1.003	1	0.992	0.22	0.22	0.19	-0.17	0.04	0.05	0.02	0	0	-0.01	0.501064	0.498341	0.602314	0.651134	0.612561	0.584822	0.330274	0.873321	0.990142	0.765728	0.889498	0.902448	0.922119
FALSE	High	Master Protein	TGGT1_223540-t26_1-p1	transcript=TGGT1_223540-t26_1 | gene=TGGT1_223540 | organism=Toxoplasma_gondii_GT1 | gene_product=Importin N-terminal domain-containing protein [Source:UniProtKB/TrEMBL;Acc:S7UWB9] | transcript_product=importin-beta N-terminal domain-containing protein | location=TGGT1_chrX:3650759-3662029(-) | protein_length=1095 | sequence_SO=chromosome | SO=protein_coding_gene | is_pseudo=false	MAVAPPDPQQLCQVLEGTYSQNEEVRRTSEQYLQTISPSPGLLAALLKIVQHDQIDVGVRTSAAVMLKNEVKKHWDCPGAGLDENEEDASSARKKEEFYSGEEKTFIKDNIYQALIQVCPVSQPVSQQLLECIRLIALHDYPSSWPLLLPAVRSDIAARQDSSRLMCALSVLRRLCGIYEFKRTDKEALDSIIEQTWPLLLPAAAQLLNEGGLSNSDAMQMLKLICKVYWSSTQVCLASSGLVVSTMDDWMELMEQILVRPVPAEMLSGLEPGERCELPVFKVKKWALQIIQRAFSRFGDQKLLSRSRSKDNDVAHAFGRNFAMQWAPRFTEKILLLLRQRQERPEQVQFWLTPRMVNLMLQFLLLATEAAKIYSTLLKPSGEFLVSQVCVPLLQFNEE…	0	113.538	26	27	50	27	1095	122.1	4.77	139.99	27	0.884	0.88	0.882	1.13	0.999	0.995	0.996	0.991	1.014	0.996	-0.18	-0.18	-0.18	0.18	0	-0.01	-0.01	-0.01	0.02	-0.01	0.439528	0.528538	0.5891	0.527552	0.98441	0.550297	0.933705	0.652309	0.335558	0.832472	0.889498	0.902448	0.922119
FALSE	High	Master Protein	P02545	Prelamin-A/C OS=Homo sapiens (Human) OX=9606 GN=LMNA PE=1 SV=1	METPSQRRATRSGAQASSTPLSPTRITRLQEKEDLQELNDRLAVYIDRVRSLETENAGLRLRITESEEVVSREVSGIKAAYEAELGDARKTLDSVAKERARLQLELSKVREEFKELKARNTKKEGDLIAAQARLKDLEALLNSKEAALSTALSEKRTLEGELHDLRGQVAKLEAALGEAKKQLQDEMLRRVDAENRLQTMKEELDFQKNIYSEELRETKRRHETRLVEIDNGKQREFESRLADALQELRAQHEDQVEQYKKELEKTYSAKLDNARQSAERNSNLVGAAHEELQQSRIRIDSLSAQLSQLQKQLAAKEAKLRDLEDSLARERDTSRRLLAEKEREMAEMRARMQQQLDEYQELLDIKLALDMEIHAYRKLLEGEEERLRLSPSPTSQRSR…	0	113.39	41	26	65	25	664	74.1	7.02	157.59	26	0.874	0.906	0.931	1.236	1.079	1.12	1.151	1.112	1.07	1.056	-0.2	-0.14	-0.1	0.31	0.11	0.16	0.2	0.15	0.1	0.08	0.620272	0.662146	0.733777	0.423656	0.259037	0.00658557	0.0274641	0.28524	0.194891	0.134063	0.889498	0.902448	0.923577
FALSE	High	Master Protein	TGGT1_252220-t26_1-p1	transcript=TGGT1_252220-t26_1 | gene=TGGT1_252220 | organism=Toxoplasma_gondii_GT1 | gene_product=TPR_REGION domain-containing protein [Source:UniProtKB/TrEMBL;Acc:S7VVZ4] | transcript_product=tetratricopeptide repeat domain containing protein | location=TGGT1_chrIII:391134-397188(+) | protein_length=565 | sequence_SO=chromosome | SO=protein_coding_gene | is_pseudo=false	MSATEAAQALKAKGNAAFQEGKYEDAVGFFTEAIKCTPDDAVLYSNRSGAYASLNKLEEALNDAEMCVKLRPTWGKGYSRKGLAEFRMMKYKEAEATYHKGLQVDPTNEQLKEGLNQVQQQTDQFFSMQAMLAAAQAVNKHPKLAKYQQEDPEYTHRLTEILKQIQKNPQSLKLIMAQPDVRVKEGVIAAMGGDLEEEEELPQSRTAAGPTRGSAENASATKAAAGVKTAEQPAKELTKEEQEAEELKQKGNELYKQKKFEAALEAYDEAIEKNPNEILYLNNKAAVYMELGDYDKCLAECQKALDRRYECKADFSKVAKVYCRMAACKTRSGDYSGAIAMYEKALCEDNNRMTRNALNEVKKLKEKKEKEDYINPALAEQHREKGNEYFKQGDYPAAK…	0	113.279	45	25	66	25	565	63.4	6.51	167.2	25	1.029	1.023	1.003	1.009	1.039	1.033	1.012	1.027	1.013	1.045	0.04	0.03	0	0.01	0.05	0.05	0.02	0.04	0.02	0.06	0.653086	0.0500612	0.898141	0.645384	0.448864	0.303094	0.137742	0.0817343	0.44137	0.179867	0.889498	0.902448	0.963195
FALSE	High	Master Protein	TGGT1_227360-t26_1-p1	transcript=TGGT1_227360-t26_1 | gene=TGGT1_227360 | organism=Toxoplasma_gondii_GT1 | gene_product=Ribosomal protein RPL3 [Source:UniProtKB/TrEMBL;Acc:A0A125YQV1] | transcript_product=ribosomal protein RPL3 | location=TGGT1_chrX:901297-903989(-) | protein_length=389 | sequence_SO=chromosome | SO=protein_coding_gene | is_pseudo=false	MSHRKFERPRHGSLGFLPRKRCKRHRGKVKAFPKDDPSKPPHLTAFMGYKAGMTHVVRELDKPGSKLHKKEIVEAVTVVDTPPMVCVGVVGYIETPRGLRALVTVWAGHLSDECKRRFYKNWYKSKRKAFTKYAKRYGDNNKMEAELTRMKNYCSVIRAICHTQPSKTPIGSKKAHVMEIQVNGGSIAEKVDFCTKMFETAVPVKAVFTEGEMIDVIGVTKGHGVKGVVSRWGVTRLPRKTHRGLRKIACIGAWHPARVQFQVPRHGQKGYFHRTEMNKKVYRVGNGADPRNATTESDLTEKRITPMGGFPHYGTVNNDFLLLKGCIVGCKKRPITFRKTLVPRTTRRALEPVNLKFIDTSAKWGHGRFQTSEEKAKFYGPLKSRAAAM	0	113.238	42	18	80	17	389	44	10.3	214.59	18	1.006	1.023	0.997	0.995	1.001	1.018	0.992	0.996	0.987	1.002	0.01	0.03	0	-0.01	0	0.03	-0.01	-0.01	-0.02	0	0.194661	0.470887	0.954347	0.861446	0.964084	0.027596	0.737763	0.451924	0.381863	0.727588	0.889498	0.902448	0.982943
FALSE	High	Master Protein	P13645	Keratin, type I cytoskeletal 10 OS=Homo sapiens (Human) OX=9606 GN=KRT10 PE=1 SV=6	MSVRYSSSKHYSSSRSGGGGGGGGCGGGGGVSSLRISSSKGSLGGGFSSGGFSGGSFSRGSSGGGCFGGSSGGYGGLGGFGGGSFRGSYGSSSFGGSYGGIFGGGSFGGGSFGGGSFGGGGFGGGGFGGGFGGGFGGDGGLLSGNEKVTMQNLNDRLASYLDKVRALEESNYELEGKIKEWYEKHGNSHQGEPRDYSKYYKTIDDLKNQILNLTTDNANILLQIDNARLAADDFRLKYENEVALRQSVEADINGLRRVLDELTLTKADLEMQIESLTEELAYLKKNHEEEMKDLRNVSTGDVNVEMNAAPGVDLTQLLNNMRSQYEQLAEQNRKDAEAWFNEKSKELTTEIDNNIEQISSYKSEITELRRNVQALEIELQSQLALKQSLEASLAETEGR…	0	113.126	36	21	65	18	584	58.8	5.21	169.4	21	1.359	1.082	1.024	0.615	0.835	0.665	0.629	0.736	0.683	0.545	0.44	0.11	0.03	-0.7	-0.26	-0.59	-0.67	-0.44	-0.55	-0.88	0.302529	0.687241	0.883273	0.059154	0.355203	0.281614	0.224845	0.155368	0.425454	0.246337	0.889498	0.902684	0.95797
FALSE	High	Master Protein	TGGT1_221470-t26_1-p1	transcript=TGGT1_221470-t26_1 | gene=TGGT1_221470 | organism=Toxoplasma_gondii_GT1 | gene_product=hypothetical protein | transcript_product=hypothetical protein | location=TGGT1_chrII:360683-367434(+) | protein_length=552 | sequence_SO=chromosome | SO=protein_coding_gene | is_pseudo=false	MFNPNATMDWIRGGPAAGVVFQVHQSKFVIPAEVMNRSDVQGSGLALVAKNEGFKDIPPKLPRAEDGSILLSRPLESFELLVDHLLELEPLKNIPLKDFASKYIALKSEVAYWQLPLDDLPFNDRIYFETAWTDENCLFPLTDEDAAALDRQTAAEAPSGRRVALSSLTTQPAEISKAFLDVEKNPEEAKDWSFFAVEAEEARTSGSSEASPDRLVFAVGPKKFFCKVPFVSDLCVHYGRLPEREADFSSFAILVSPAETTVVWNRGCFIHIRVREEASGPLSAQINVIQETPSWLCVHPYLDYVLSGVKGPVPHVFCFNMPEASAVRFFPWGCLVVNKQVTLESRKKADFQNSSAIVARAPTRDEGGANEHFKRLFTFLQPDAPKRGHEDLPEYKPAK…	0	112.984	47	21	50	21	552	61.6	6.18	134.28	21	0.942	0.95	0.964	1.035	0.975	0.983	0.997	1.005	1.006	0.935	-0.09	-0.07	-0.05	0.05	-0.04	-0.02	0	0.01	0.01	-0.1	0.354997	0.458257	0.561268	0.565829	0.117803	0.10901	0.493416	0.765388	0.516162	0.461751	0.889498	0.902448	0.922119
FALSE	High	Master Protein	TGGT1_253430-t26_1-p1	transcript=TGGT1_253430-t26_1 | gene=TGGT1_253430 | organism=Toxoplasma_gondii_GT1 | gene_product=Glutamine amidotransferase type-2 domain-containing protein [Source:UniProtKB/TrEMBL;Acc:A0A125YQ67] | transcript_product=putative asparagine synthetase | location=TGGT1_chrIII:924367-930594(+) | protein_length=588 | sequence_SO=chromosome | SO=protein_coding_gene | is_pseudo=false	MCGILAILMSSLSRDQLRQLALERSRLSVFYRGGLDQECMGKSLWLRHRGPDSNGVHVQEYSTTLCNALAHERLAIVDPATGKQPLCDASGTFVCVANGEIYNHVELTKTLLPPEEVAKWKTASDCQPLPSLFKFHGPSICDKLDGIFSFVISNGATGEFIAARDPLGVCSLYVGYASDGSIWFASELKALTRDCEQVTVFPPGHFYLSTMNEGKGGFQRYYNPSWWGVDKPLPTYRCDLGQLREALEAAVRKRLMCDVPFGLMLSGGVDSSIIAAIAAKEFQKMSATEKGSHIWTNQIHAFSIGLKDGPDRKFAKMVADMLGTVHHEFTFELEEGLDALDDVIYMIETYDITTVRASVPMYLLCRMIKSLGVKVVLTGEGADEVFGGYLYFHSAPNRE…	0	112.419	40	21	68	21	588	65.8	6.73	198.06	21	0.892	0.905	0.89	1.115	0.995	1.009	0.993	1.025	1.013	0.989	-0.17	-0.14	-0.17	0.16	-0.01	0.01	-0.01	0.04	0.02	-0.02	0.445363	0.537378	0.41871	0.463275	0.0899092	0.675818	0.491518	0.263387	0.485796	0.79746	0.889498	0.902448	0.922119
FALSE	High	Master Protein	P08133	Annexin A6 OS=Homo sapiens (Human) OX=9606 GN=ANXA6 PE=1 SV=3	MAKPAQGAKYRGSIHDFPGFDPNQDAEALYTAMKGFGSDKEAILDIITSRSNRQRQEVCQSYKSLYGKDLIADLKYELTGKFERLIVGLMRPPAYCDAKEIKDAISGIGTDEKCLIEILASRTNEQMHQLVAAYKDAYERDLEADIIGDTSGHFQKMLVVLLQGTREEDDVVSEDLVQQDVQDLYEAGELKWGTDEAQFIYILGNRSKQHLRLVFDEYLKTTGKPIEASIRGELSGDFEKLMLAVVKCIRSTPEYFAERLFKAMKGLGTRDNTLIRIMVSRSELDMLDIREIFRTKYEKSLYSMIKNDTSGEYKKTLLKLSGGDDDAAGQFFPEAAQVAYQMWELSAVARVELKGTVRPANDFNPDADAKALRKAMKGLGTDEDTIIDIITHRSNVQRQ…	0	112.272	42	28	64	28	673	75.8	5.6	121.7	28	0.854	0.877	0.87	1.188	1.014	1.042	1.034	1.057	1.048	1.094	-0.23	-0.19	-0.2	0.25	0.02	0.06	0.05	0.08	0.07	0.13	0.461794	0.550371	0.504818	0.474611	0.589658	0.0846396	0.314256	0.346935	0.60659	0.252824	0.889498	0.902448	0.922119
FALSE	High	Master Protein	TGGT1_251690-t26_1-p1	transcript=TGGT1_251690-t26_1 | gene=TGGT1_251690 | organism=Toxoplasma_gondii_GT1 | gene_product=AA_TRNA_LIGASE_II domain-containing protein [Source:UniProtKB/TrEMBL;Acc:S7WG10] | transcript_product=putative seryl-tRNA synthetase, cytoplasmic | location=TGGT1_chrXII:5452731-5454179(+) | protein_length=482 | sequence_SO=chromosome | SO=protein_coding_gene | is_pseudo=false	MTIDVNLLRAEKGGDPALVRDSEVRRGRSGEVVDQAVAVDKKWRENLFQLEQLKKELNAVNKEIGQRKKKDAKDPCQDLLAKSAELKQRLPTIEAAATEAEEKRESLLHKIGNIVHKSVPVSNDEVNNQVVRTWGTFDRNLKIDGTPGRMHHHQILARLGGVDFKKGVEAAGHRGYFLKGAGMLLNLALAQYGLAFLLRKGYTPVQPPFFMRKEVMARAAELKDFEETLYRIPHNQTGSSADSKEGAEKNGEKKNEKDADRDDLFLIATSEQPLCSLHMNETLEEKELPIRYAGYSSCFRKEAGSHGKDCWGIFRIHQFEKVEQFCITTPEESWKMHEDMIGMAEEFYQTLELPYRVVSIVSGALNDAAAKKYDLEAWFPGYGDFRELVSCSNCTDYQA…	0	111.764	49	25	81	25	482	54.1	7.02	190.96	25	0.981	0.977	0.967	1.021	1.002	0.998	0.988	1.002	0.986	0.969	-0.03	-0.03	-0.05	0.03	0	0	-0.02	0	-0.02	-0.05	0.497238	0.412052	0.395371	0.32	0.791659	0.792757	0.499163	0.870591	0.346251	0.511469	0.889498	0.902448	0.922119
FALSE	High	Master Protein	TGGT1_217890-t26_1-p1	transcript=TGGT1_217890-t26_1 | gene=TGGT1_217890 | organism=Toxoplasma_gondii_GT1 | gene_product=Peroxiredoxin [Source:UniProtKB/TrEMBL;Acc:A0A125YNG7] | transcript_product=putative alkyl hydroperoxide reductase/ Thiol specific antioxidant/ Mal allergen | location=TGGT1_chrXII:2143499-2144089(-) | protein_length=196 | sequence_SO=chromosome | SO=protein_coding_gene | is_pseudo=false	MPAPMVSQPAPAFEAEAVMADGSFGKISLSQFKGKKYVVLFFYPFDFTFVCPSEILAFHRLHGEFEKRGCQLLGVSVDSKFVHNAWRNVELKDGGIGKISFPLLADVSHKMAEDYGVLHPEGMAFRGLFLIDKEGVLQHCVINNLPLGRSADEALRMLDALQHVEQYGEVCPANWKKGDKAMKPTAEGVKEYLGSK	0	111.528	58	11	73	11	196	21.7	6.87	265.37	11	1.119	1.134	1.124	0.896	1.003	1.017	1.008	1.029	1.009	1.01	0.16	0.18	0.17	-0.16	0	0.02	0.01	0.04	0.01	0.01	0.510144	0.444347	0.405429	0.534079	0.668101	0.495117	0.863934	0.343725	0.465017	0.715125	0.889498	0.902448	0.922119
FALSE	High	Master Protein	TGGT1_212300-t26_1-p1	transcript=TGGT1_212300-t26_1 | gene=TGGT1_212300 | organism=Toxoplasma_gondii_GT1 | gene_product=hypothetical protein | transcript_product=hypothetical protein | location=TGGT1_chrX:3837742-3842895(+) | protein_length=683 | sequence_SO=chromosome | SO=protein_coding_gene | is_pseudo=false	MSAQGQQGVRSTVAAGKNRFWQPAPITVLLVLSSSFLFAFAANTPQNSSTTGQSTPSDDHGVSTEHFHDAVTVDAAEHAGEDEMTACSPEAARVIEARVATLKAETEAAVAEVRRTEAMQRELFGRLNAKVRAMNDRLDELSDAQKSLAKRLETTGQLLIADREEQAKRFTTDVETYIIESGLKKAVFQQREIAAKLQTLAESNQKSKQALDALLQHVDDEKEQTKQWISTVVRDLEKYVEARTQTTLESLQRDAQEHANFMQQQLNDMKLDHLLLLQAVSSAETQLNERGIAGVDISQLDESASFERMMTTFEKVLKEQLKGKFVLPIFVVTQCPDSMERVAFMNTYLVPSKRNFRAVFQALGHTPQASAVVIRIESVMVEAWMEVNGKVTGMQYLTP…	0	111.492	38	21	51	21	683	75.6	6.51	135.92	21	1.076	1.086	1.092	0.992	1.068	1.077	1.083	1.016	1.018	1.017	0.11	0.12	0.13	-0.01	0.09	0.11	0.12	0.02	0.03	0.02	0.285589	0.241571	0.31325	0.954336	0.540664	0.509957	0.422281	0.665806	0.57722	0.685721	0.889498	0.902448	0.922119
FALSE	High	Master Protein	TGGT1_295110-t26_1-p1	transcript=TGGT1_295110-t26_1 | gene=TGGT1_295110 | organism=Toxoplasma_gondii_GT1 | gene_product=Protein kinase domain-containing protein [Source:UniProtKB/TrEMBL;Acc:A0A125YJ16] | transcript_product=rhoptry protein ROP7 | location=AAQM03000462:293-2020(-) | protein_length=575 | sequence_SO=contig | SO=protein_coding_gene | is_pseudo=false	MGHPTSFGQPSCLVWLAAAFLVLGLCLVQQGAGIQRPHQWKSSEAALSVSPAGDIVDKYSHDSTEGENTVSEGEAEGSRGGSWLEQEGVELRPPLLDSQTGTSTASPTGFRRFLRHLRFWRRGSTRGSDDAAEVSRRTRVPLHTRLLQHLRRVGRFFRHGIPAAAGRFFRRVWPERPQPVFTEGDPPDLETNSLYYRDKVPGEVIIREVLGKVAGFGPTSGHGVFAAYENAFSEMLWAEGGAVTVISELGRPGRQLVRGNLINIVDGGLLFQATDQATGEPMTVLVGSTWNKPSGKDLDKLRHQALAIGLFQKVKNPYLANRYLRFLAPFDLVTIPGKPLVQKAKSHNEVGWVINLLLLLPAIEIDMGRFVEELYELPTEDRPLADAARLYLTVQAVRL…	0	111.466	37	16	64	9	575	63.4	7.01	197.25	16	1.007	0.996	0.998	1.01	1.017	1.006	1.008	1.018	0.989	1.026	0.01	-0.01	0	0.01	0.02	0.01	0.01	0.03	-0.02	0.04	0.835913	0.876676	0.313304	0.681345	0.287045	0.35534	0.716913	0.509827	0.340408	0.0735812	0.926897	0.951618	0.922119
FALSE	High	Master Protein	TGGT1_304990-t26_1-p1	transcript=TGGT1_304990-t26_1 | gene=TGGT1_304990 | organism=Toxoplasma_gondii_GT1 | gene_product=GBP domain-containing protein [Source:UniProtKB/TrEMBL;Acc:S7UIA3] | transcript_product=guanylate-binding protein, N-terminal domain-containing protein | location=TGGT1_chrIX:4925765-4936769(+) | protein_length=1281 | sequence_SO=chromosome | SO=protein_coding_gene | is_pseudo=false	MEGLLARVTSTRRTASPAGPAGGSRIARLSPFSLCPSRLCLVFGVALLPLLITFSLPASFHFFDSDSSFPFPFVCSLLSPTPATSSASPEGASTVSQSPSFFLLPASASPLASAAGLAGGAVALGARQAESAEVAKASKADKGARRKKKMPPRLLQVVRPNERHTGLEIDEEALAYIEAIPAPISVVTAVGSIHTGKSFLLSQLLAFSYPHDISYDPLPDPSSTNSTLSSSSPSSRRFTAFPVGYTVHPGTQGLSVWSEPLRVDRQTGRVVVEEEKGKQRKSSVGKSEVEQVTNVLLLDTEGFGGPNVTRSYDQLLYAVASLVSSEILFTTMKMIDAQSLQLLEDLTRDANLFNLRAHAQSVNATSTLPQHSEKREPSLAAGSSKHQQSEASSGQEKRA…	0	111.357	21	26	45	26	1281	142.7	6.77	111.71	26	1.014	1.019	1.023	0.957	0.97	0.976	0.979	0.972	0.974	1.009	0.02	0.03	0.03	-0.06	-0.04	-0.04	-0.03	-0.04	-0.04	0.01	0.750762	0.538583	0.507022	0.356743	0.108247	0.14835	0.118373	0.192536	0.10036	0.174711	0.897774	0.902448	0.922119
FALSE	High	Master Protein	TGGT1_240600-t26_1-p1	transcript=TGGT1_240600-t26_1 | gene=TGGT1_240600 | organism=Toxoplasma_gondii_GT1 | gene_product=Putative chaperonin cpn60 [Source:UniProtKB/TrEMBL;Acc:S7W6R0] | transcript_product=putative chaperonin cpn60 | location=TGGT1_chrVI:1306402-1309981(+) | protein_length=667 | sequence_SO=chromosome | SO=protein_coding_gene | is_pseudo=false	MLLEPEVGMMVALASFVPYPLILVGFGISSFASCFQLPAPNAFLGHSLLRSPSSEGSHPVSPATVRGKHVPLVINDNYRAPSTRQGSPSTLMARKAKRLILADECRNQLLEGIEAVAGAVRVTLGPRGRNVLLEKEYGPPMIVNDGVTIARNIELKSRAHNAGAKLVQEVASTSDEWAGDGTSSTTILTAEIARQGVDHVNKGHNPIPLQRGIQRAAKVMMEEVKRLAKPVDGMNDLLNIATVATSGNVAMGQVIAKSFDKLGRHAAIVLEDNPALEDTLEFTEGYTFERGYSSPYFLVGEDRDIIEWQSPSILVCDYKIETAQSILPILEHFVRTKAPLVLIAEDFGPEVLQTCIINRMRQLLKVVTIRAPSFGERRKEYLRDIAVATNAQLISRDLG…	0	111.313	36	21	76	21	667	72.2	5.68	222.03	21	1.039	1.013	1.026	0.969	1.007	0.981	0.994	1.012	1.002	0.987	0.06	0.02	0.04	-0.05	0.01	-0.03	-0.01	0.02	0	-0.02	0.713031	0.901968	0.745047	0.692031	0.780224	0.541934	0.128956	0.239331	0.879438	0.673868	0.892039	0.96164	0.926505
FALSE	High	Master Protein	TGGT1_225690-t26_1-p1	transcript=TGGT1_225690-t26_1 | gene=TGGT1_225690 | organism=Toxoplasma_gondii_GT1 | gene_product=hypothetical protein | transcript_product=hypothetical protein | location=TGGT1_chrX:2025685-2031135(+) | protein_length=1816 | sequence_SO=chromosome | SO=protein_coding_gene | is_pseudo=false	MALPRLPSKESNALTRHDSSNTAYFQDYWSENSSDSGLSQGQDNACTPLCGNGGRVRGFQASVVVPPPAPSPGHQTGQFTTLSHPSQYETVTAAHEGGGVPQHQQESSLHHSSVCHIPPGSQCSPLQRSAVDLTSASAGGHSPSGYSRPQQLPIRDHLSSQANSLFVSAANGHLVTQSQGQAKVENPTNHIQPTLAHNGDAGNPASRGTGAERPETKKGKRSQGKKAGEGASRGKGTPQNTASRTKGNEQQPQGASGKQDASKQKRTTLKRNPAGKPELAGVSAKSLPVGDASMGAEAARGVAISADYLKRNQQEDSGVAPSPSEAAVTTQSGGEGSRISAGISPAQNLPGSSAAGASKGVVALAHDITPGWGMLPAEAQHYSATTSQQQREWKSLKES…	0	111.274	19	26	41	26	1816	194	6.13	121.44	26	1.005	0.968	1.008	0.987	0.993	0.956	0.995	0.968	0.995	0.974	0.01	-0.05	0.01	-0.02	-0.01	-0.06	-0.01	-0.05	-0.01	-0.04	0.832011	0.188233	0.399211	0.0633509	0.775622	0.153893	0.488604	0.14553	0.716099	0.356469	0.925148	0.902448	0.922119
FALSE	High	Master Protein	TGGT1_248740-t26_1-p1	transcript=TGGT1_248740-t26_1 | gene=TGGT1_248740 | organism=Toxoplasma_gondii_GT1 | gene_product=hypothetical protein | transcript_product=hypothetical protein | location=TGGT1_chrXII:4066708-4074096(-) | protein_length=1283 | sequence_SO=chromosome | SO=protein_coding_gene | is_pseudo=false	MENTEREDAPREATPATPAVPETAQNAIASASATAGEPSARSESKPLVLEVRGFLEVVDVKGPPNLNIRSVSVAGVPRRQLSNSAAREATAVKSATPQRVGSKAEVKKEDGKETRQLISKARPAPKQIEAAAPDAQASAPAAKPKLLVKKAAPTPKAAEEKQEKKQDTQIEEKKEGEKDAKKVEAVRKVPLVNKAPAKATAAKQEEKKAEEDVKEAAKPDPVKKVLVVKKAPPKAMAAKKEEKTEEKEAKKEEAKKEEAKKEDEKKEEEKKEEAKKEDEKKEDEKKDEAKKEEAKKEEKTEEKEAKKEEEKKEEAKKEDEKKDEAKKGEVKQEEAKKEEVKQEEAKKEEAKKEEAKKEEVKQGEEKKEEEKKKDDKELKKAESLKKVVLVKKAAPKVMV…	0	110.836	23	29	58	29	1283	140	8.44	130.55	29	1.091	1.088	1.092	0.92	1.004	1.001	1.005	0.996	1.007	1.003	0.13	0.12	0.13	-0.12	0.01	0	0.01	-0.01	0.01	0	0.460272	0.5107	0.485213	0.524337	0.813133	0.691041	0.563836	0.555594	0.843911	0.924461	0.889498	0.902448	0.922119
FALSE	High	Master Protein	TGGT1_319560-t26_1-p1	transcript=TGGT1_319560-t26_1 | gene=TGGT1_319560 | organism=Toxoplasma_gondii_GT1 | gene_product=EGF-like domain-containing protein [Source:UniProtKB/TrEMBL;Acc:S7VSV0] | transcript_product=microneme protein MIC3 | location=TGGT1_chrIV:856315-857588(+) | protein_length=383 | sequence_SO=chromosome | SO=protein_coding_gene | is_pseudo=false	MRGGTSALLHALTFSGAVWMCTPAEALPIQKSVQLGSFDKVVPSREVVSESLAPSFAVTETHSSVQSPSKQETQLCAISSEGKPCRNRQLHTDNGYFIGASCPKSACCSKTMCGPGGCGEFCSSNWIFCSSSLIYHPDKSYGGDCSCEKQGHRCDKNAECVENLDAGGGVHCKCKDGFVGTGLTCSEDPCSKRGNAKCGPNGTCIVVDSVSYTCTCGDGETLVNLPEGGQGCKRTGCHAFRENCSPGRCIDDASHENGYTCECPTGYSREVTSKAEESCVEGVEVTLAEKCEKEFGISASSCKCDNGYSGSASATSHHGKGESGSEGSLSEKMNIVFKCPSGYHPRYHAHTVTCEKIKHFALDGAGNHDTTTYVARRRYPASL	0	110.647	42	12	135	12	383	40.5	6.64	465.88	12	1.077	1.096	1.062	0.953	1.027	1.045	1.013	1.062	1.042	1.068	0.11	0.13	0.09	-0.07	0.04	0.06	0.02	0.09	0.06	0.09	0.630091	0.521528	0.682085	0.692126	0.441523	0.110714	0.639416	0.0351628	0.359089	0.175672	0.889498	0.902448	0.922119
FALSE	High	Master Protein	P35527	Keratin, type I cytoskeletal 9 OS=Homo sapiens (Human) OX=9606 GN=KRT9 PE=1 SV=3	MSCRQFSSSYLSRSGGGGGGGLGSGGSIRSSYSRFSSSGGGGGGGRFSSSSGYGGGSSRVCGRGGGGSFGYSYGGGSGGGFSASSLGGGFGGGSRGFGGASGGGYSSSGGFGGGFGGGSGGGFGGGYGSGFGGFGGFGGGAGGGDGGILTANEKSTMQELNSRLASYLDKVQALEEANNDLENKIQDWYDKKGPAAIQKNYSPYYNTIDDLKDQIVDLTVGNNKTLLDIDNTRMTLDDFRIKFEMEQNLRQGVDADINGLRQVLDNLTMEKSDLEMQYETLQEELMALKKNHKEEMSQLTGQNSGDVNVEINVAPGKDLTKTLNDMRQEYEQLIAKNRKDIENQYETQITQIEHEVSSSGQEVQSSAKEVTQLRHGVQELEIELQSQLSKKAALEKSLE…	0	110.15	38	21	67	20	623	62	5.24	165.06	21	1.322	1.001	1.003	0.29	0.384	0.291	0.291	0.404	0.329	0.267	0.4	0	0	-1.78	-1.38	-1.78	-1.78	-1.31	-1.6	-1.91	0.0629453	0.997929	0.981368	0.14379	0.166599	0.0259191	0.0866595	0.212705	0.0884363	0.0590256	0.889498	0.999504	0.994753
FALSE	High	Master Protein	TGGT1_289540-t26_1-p1	transcript=TGGT1_289540-t26_1 | gene=TGGT1_289540 | organism=Toxoplasma_gondii_GT1 | gene_product=hypothetical protein | transcript_product=hypothetical protein | location=TGGT1_chrIX:3100902-3103715(+) | protein_length=937 | sequence_SO=chromosome | SO=protein_coding_gene | is_pseudo=false	MSHKTMAKSGGRSTGAVRSHDAGSPSAPVASKSRPWRLGCMVVSLAAFAVAISTPSLSPAPASLASFSGLQPAEAAGLVASMKRAANQGWRTGARWLCTVFGLQYEHVKSVFRRSGRHLELETLSEEVDRYLQLVEAAGHNEGNLPDAYQERGVHLVLAAQELFSRVLGKRVELPARYKAAARRFEAMKKKKKDSGSRKGPAPESATEAPAPAEPTGSDVSSSGAEARPQAESPAKEASKPEAEAVPTAASSLVAVPMRDRAFEESANERLRALKARHEADVSAIVDEANTRLKQYQEEHKMTYDKKISHLRAQQHAELDQALRELQEETLRFEDGKKQYEVVSALLTEAKAGIAVLSEGLQFIGANFYSIDQQIDKVAEEQKELEQADGDKAMIQKAF…	0	109.919	30	24	41	24	937	100.5	7.23	117.72	24	1.141	1.13	1.126	0.923	1.053	1.043	1.04	0.994	1.005	1.019	0.19	0.18	0.17	-0.11	0.07	0.06	0.06	-0.01	0.01	0.03	0.463016	0.522249	0.397209	0.743039	0.591041	0.583795	0.765714	0.830801	0.555644	0.345392	0.889498	0.902448	0.922119
FALSE	High	Master Protein	TGGT1_232600-t26_1-p1	transcript=TGGT1_232600-t26_1 | gene=TGGT1_232600 | organism=Toxoplasma_gondii_GT1 | gene_product=PNPLA domain-containing protein [Source:UniProtKB/TrEMBL;Acc:S7V2V6] | transcript_product=phospholipase, patatin family protein | location=TGGT1_chrVIII:2182196-2184854(+) | protein_length=665 | sequence_SO=chromosome | SO=protein_coding_gene | is_pseudo=false	MMKGNSVSLRSLSLCLLFSLLLFSFCMDTRSSATDGADKAESAVSAAPESAEEPSGEDASESSLGEDEEDSEEEDENEDEDFSSLFGSLGGGGFGRGLDNLQGMSGLFDNLGTDSDGEHKLGNLASLLPNLGMIGKGGGDGKEELAELLSKASAQQNSGTNQVSPDFVNQIFSMLSKNNTALNDIMSEFMQDPYMDIKETERPKIDPEVFANPPAQTDNAAGNAKDGETPESSPAEAYASDAATADGPEEIILSKIKKFVKKPGDRDADNAAADPFAETNDAGVCHILVLSGGGARSAFQAGGIVGLAEQYKAQGRELKWDVVTGVGFGGVQAAFGLPFKPGHNGELDYGESLWRFWQGLKKEDILKCENGMKDLMDIRATMQWIQKSQKYASNVAKLL…	0	109.385	33	16	58	16	665	70.7	4.58	167.3	16	1.005	1.014	0.99	1.03	1.036	1.045	1.02	1.024	1.026	1.076	0.01	0.02	-0.01	0.04	0.05	0.06	0.03	0.03	0.04	0.11	0.726423	0.821904	0.632341	0.0763672	0.265115	0.512855	0.35108	0.243812	0.628788	0.343491	0.894792	0.931085	0.922119
FALSE	High	Master Protein	TGGT1_269950-t26_1-p1	transcript=TGGT1_269950-t26_1 | gene=TGGT1_269950 | organism=Toxoplasma_gondii_GT1 | gene_product=Thioredoxin domain-containing protein [Source:UniProtKB/TrEMBL;Acc:S7V464] | transcript_product=hypothetical protein | location=TGGT1_chrVIII:5501073-5504592(-) | protein_length=944 | sequence_SO=chromosome | SO=protein_coding_gene | is_pseudo=false	MIGLFSSHFLRRHKMAGRASVVVSLLFSASLWSLLSRVDGAPANLSPAAHPAVPAVISEHPFGTSPVHMATSASGFREFVAQHLTAGDVVIVLFFSRHCPHCIRFKVTYRRLADRLGQRVKTEKNGAFFAAVDAGAAQVTDQEDSIWDILREFRVSFIPDVRLLVPLHRVRSAADEDGAELKNESPGTAKELGPDYGSLAAWTLQVSHHEMSEDGIDTLLRTYIETTGLDKLEENDEQFSEKRRSRQEILESNLKLLEAVCPTTEFPPAPVGSPVPALCRGGERWSPDAERVSGETPGNRLHDALAVFLHVMRRWIVASDSSLHLSLEKELALARFLELALYALPGKAIKGAIFRLLLHLRTLGSGLQPLPQSLLSREEFHAALEKASRMGEAGADENA…	0	109.257	30	25	68	25	944	104.6	5.73	177.57	25	1.034	1.031	1.058	0.99	1.024	1.021	1.047	0.962	0.981	0.933	0.05	0.04	0.08	-0.01	0.03	0.03	0.07	-0.06	-0.03	-0.1	0.587797	0.506858	0.365048	0.927263	0.679695	0.77487	0.53265	0.110525	0.442639	0.490817	0.889498	0.902448	0.922119
FALSE	High	Master Protein	TGGT1_315320-t26_1-p1	transcript=TGGT1_315320-t26_1 | gene=TGGT1_315320 | organism=Toxoplasma_gondii_GT1 | gene_product=SAG-related sequence SRS52A [Source:UniProtKB/TrEMBL;Acc:S7UMK1] | transcript_product=SAG-related sequence SRS52A | location=TGGT1_chrXI:4594837-4596241(+) | protein_length=329 | sequence_SO=chromosome | SO=protein_coding_gene | is_pseudo=false	MARISVVPIRLIMTGSLFFVVVVLMSTTALRAEGTNGAPSTKICNADAAAKGGISVEVDPATKKVSFSCGTDMGNVLPLPGDNNTITKCYSRANLQGETPLAEFFGEGSKANVQTASTTSGTSAEVSLTVGKLPEMTDTIYFACSTTPASGANRAPTGDPSQNSDGNRGKTKCVVTVTVPADPNANTCTVAKQSMTLMITKDSKTVSFLCDMDIATLLPQDFSHEILDESCQEKVKLADVLPSATFQETSSAHVFSVKELPKTEATYCYKCSPPVDSGDTADGKKNACTVKIRVSASSGENLSVSVTAGSVCALVFGLFVSSVFSTVPL	0	108.87	56	13	85	13	329	34.2	5.52	267.66	13	1.088	1.095	1.053	0.951	1.035	1.042	1.001	1.107	1.089	1.126	0.12	0.13	0.07	-0.07	0.05	0.06	0	0.15	0.12	0.17	0.651957	0.52787	0.76682	0.686298	0.587124	0.0868832	0.985524	0.0668807	0.00233575	0.294232	0.889498	0.902448	0.927959
FALSE	High	Master Protein	TGGT1_286080-t26_1-p1	transcript=TGGT1_286080-t26_1 | gene=TGGT1_286080 | organism=Toxoplasma_gondii_GT1 | gene_product=Tr-type G domain-containing protein [Source:UniProtKB/TrEMBL;Acc:S7UP08] | transcript_product=elongation factor 2 family protein | location=TGGT1_chrV:1864243-1874860(+) | protein_length=1008 | sequence_SO=chromosome | SO=protein_coding_gene | is_pseudo=false	MDGANLYDEFGNYIGPELGEDEESEGEEEEVDRPLPVVEEETDRSVAVRGLVSIGEEESTAAAVVPHELKKYYPDHAEVYPEADTVVQEEDTQPITQPIIAPVSTADFDLLEKQLPVTSFSFDYLASLMFQPESIRSVCLLGHLHSGKTTFLDMLVEETHHPPHNSRRSAPARMAKRYTDSRKDEQQRALSIKASPMSLVLQSSRYKNFLFNIFDTPGHVNFNDECCAAMRLCDGAIIVIDALEGVMSNTDRLLRHAVEEQLDIVVVINKLDRLILELRLPPADAYHKIRHTLEEVNSILEQVCEVRGREPIVISPLNNNVLFAMGQFGLIFSTRSFAKLHIDNYHPDRKAHGPRLPGEPASVEAERTPFPSVEVFEQALWGDLWIHPETRKVVDKPPF…	0	108.323	27	26	59	26	1008	113.3	5.2	137.88	26	0.897	0.903	0.89	1.099	0.986	0.993	0.978	0.994	0.984	0.999	-0.16	-0.15	-0.17	0.14	-0.02	-0.01	-0.03	-0.01	-0.02	0	0.390661	0.453663	0.33587	0.514846	0.635789	0.640266	0.604735	0.257814	0.275563	0.872747	0.889498	0.902448	0.922119
FALSE	High	Master Protein	TGGT1_249990-t26_1-p1	transcript=TGGT1_249990-t26_1 | gene=TGGT1_249990 | organism=Toxoplasma_gondii_GT1 | gene_product=hypothetical protein | transcript_product=hypothetical protein | location=TGGT1_chrXII:4909167-4913985(-) | protein_length=838 | sequence_SO=chromosome | SO=protein_coding_gene | is_pseudo=false	MAPAGLSAGCSPAGAFLTRKLNAFSARKLLFKTTFFVLFHLTLSVCLVSIRLPEQSWPSLLRCTAAAPGASTSVGPAETGSGGGDNSTSAVSNKSATKDAHNAKAGESAASSSLPGGESEDFKDRESLRLWNVDEAEAAEIKNRLASMRIHAGSLTDKFMENVARLTAQIDILRLEVNKAKGEIQRLNESFDDQTEETLRVIDNRSAEFIRGLSLVEDQLDEQLQPPSGVVYRHLQDLRNRLTEIRVAAEKNFHTEASSVMQQIDTCSAKVDDLTRLYFEMRRRMDVEVSDIDTRLISARHELEDLVQERLNQLGASEQRITAEAMKRLREFLQNLHLEENMLQDIVQNIQREFLEPSAFPGAGAHREKGATYIDLSSYFSSSKIEKVCSVMSHLVKQL…	0	108.183	33	23	44	23	838	92.7	8.25	129.65	23	0.986	1.014	1.021	1.022	1.007	1.036	1.043	1.014	1.007	0.993	-0.02	0.02	0.03	0.03	0.01	0.05	0.06	0.02	0.01	-0.01	0.661257	0.155296	0.148218	0.562222	0.908662	0.362857	0.406011	0.33847	0.741076	0.804204	0.889498	0.902448	0.922119
FALSE	High	Master Protein	TGGT1_270690-t26_1-p1	transcript=TGGT1_270690-t26_1 | gene=TGGT1_270690 | organism=Toxoplasma_gondii_GT1 | gene_product=Arginyl-tRNA synthetase [Source:UniProtKB/TrEMBL;Acc:A0A125YS10] | transcript_product=arginyl-tRNA synthetase | location=TGGT1_chrVIII:5067864-5080628(-) | protein_length=1174 | sequence_SO=chromosome | SO=protein_coding_gene | is_pseudo=false	MSNALPRPAHASSDAMGLGPSPSRASQHSSFSSTLPSSSREREAGWNEADDEGPEAEHQPRLLETLQDVPKPFLDKARGIVEQLRGREGEKATLDANSAYLLCFQLLKLAGLEAEIPRLVVFGQQSMGKTTLLDYIMGGPIGYSSTDTGTRQPVVILLRPSESADSVQCWLGGEEIEVKELQARMKEIMSSQGERISSQELEVELAVPNGVHAVFVDLPGVKDDSKAGATQTRSVVRTYVQNNPNDLYILVKKASDDPANWPWSLREFILSAPPKGLGLTPRQTVVVGTRAKEFLVNEKNDIRTQSQLLERVLKRAVKDSSGAPLPLFLLELFSLSIEEKDALDFAAKRAAMNRQMDEGGRTVRQLLETAFEPGPNPQLSRKLTEFFSPSRFKKELNHK…	0	108.015	29	32	46	32	1174	130.2	6.58	120.74	32	0.92	0.896	0.938	1.081	0.994	0.968	1.013	1.019	1.02	0.966	-0.12	-0.16	-0.09	0.11	-0.01	-0.05	0.02	0.03	0.03	-0.05	0.606739	0.436205	0.598791	0.494369	0.911048	0.253427	0.474384	0.527928	0.783435	0.285769	0.889498	0.902448	0.922119
FALSE	High	Master Protein	P07355	Annexin A2 OS=Homo sapiens (Human) OX=9606 GN=ANXA2 PE=1 SV=2	MSTVHEILCKLSLEGDHSTPPSAYGSVKAYTNFDAERDALNIETAIKTKGVDEVTIVNILTNRSNAQRQDIAFAYQRRTKKELASALKSALSGHLETVILGLLKTPAQYDASELKASMKGLGTDEDSLIEIICSRTNQELQEINRVYKEMYKTDLEKDIISDTSGDFRKLMVALAKGRRAEDGSVIDYELIDQDARDLYDAGVKRKGTDVPKWISIMTERSVPHLQKVFDRYKSYSPYDMLESIRKEVKGDLENAFLNLVQCIQNKPLYFADRLYDSMKGKGTRDKVLIRIMVSRSEVDMLKIRSEFKRKYGKSLYYYIQQDTKGDYQKALLYLCGGDD	0	107.974	50	19	67	19	339	38.6	7.75	170.53	19	0.984	0.964	0.98	1.03	1.014	0.992	1.009	1.036	1.024	1.026	-0.02	-0.05	-0.03	0.04	0.02	-0.01	0.01	0.05	0.03	0.04	0.7495	0.534555	0.793028	0.799266	0.837182	0.900489	0.812005	0.142674	0.0495519	0.254197	0.897669	0.902448	0.933446
FALSE	High	Master Protein	TGGT1_310900-t26_1-p1	transcript=TGGT1_310900-t26_1 | gene=TGGT1_310900 | organism=Toxoplasma_gondii_GT1 | gene_product=AP2 domain transcription factor AP2XI-2 [Source:UniProtKB/TrEMBL;Acc:S7UT79] | transcript_product=AP2 domain transcription factor AP2XI-2 | location=TGGT1_chrXI:1609168-1617013(-) | protein_length=2243 | sequence_SO=chromosome | SO=protein_coding_gene | is_pseudo=false	MASGTPESEANSKAAARPGGFALSLRSRRVSSSSTDPVSALSLLRETPPRGVPGNASTPGKSQELAGLCGSRSPFQSKGSREEKDKKNRLLSRRLATSSGSSTIRRTSSSTSASSTSDANALVPTAVGSEAVSRTSGDSVSSMLPFLTSLSSISGAEDDDGTERKKSEAASVAAGEAPDVLVPPEEPRAKASSPQSSLEGGDGLETKEEEREKRPADGARGSLSLHEERRKKAQGSGLEKPQSESLSRSNTMASNVPSKACMGGSDEDKRSLSRMGSGFSSFSVQEGNPVALRDGSGKIGASRQEEKSKTAEAGPLDPGSQLLDVATVSSTFATLSNEEGGAQETANRLASSGDSRQDPDSNVAVPTSPDTASAFVKQSLSLGGPGKAMGEGAGVYWPP…	0	107.923	16	30	37	30	2243	232.6	6.24	81.85	30	0.962	0.941	0.951	1.071	1.03	1.007	1.019	1.024	1.022	1.019	-0.06	-0.09	-0.07	0.1	0.04	0.01	0.03	0.03	0.03	0.03	0.594918	0.578374	0.676748	0.333772	0.271865	0.880835	0.776257	0.285892	0.651448	0.723916	0.889498	0.902448	0.922119
FALSE	High	Master Protein	TGGT1_278830-t26_1-p1	transcript=TGGT1_278830-t26_1 | gene=TGGT1_278830 | organism=Toxoplasma_gondii_GT1 | gene_product=Glucose-6-phosphate 1-dehydrogenase [Source:UniProtKB/TrEMBL;Acc:S7UZN8] | transcript_product=glucose-6-phosphate 1-dehydrogenase | location=TGGT1_chrXII:5748919-5762087(+) | protein_length=878 | sequence_SO=chromosome | SO=protein_coding_gene | is_pseudo=false	MYLPSKIGQKGDEVDKMKSANEEASPSGSSSGRSTKSSGVFPTFSVAAIPPRAAVSSLATRGIFDLSERPKEISCRNDDAFVAHGAYLLFNAIKRKLTESSYAKVVIGLSGGSTPLPIYSALRHLALASADHEPGRAATHLATAVPEFSEELQRDAKGSDSALDWTRVFFFLVDERYVHPTHADSNQRSIRKHLLGQPNGVACDQPGAECGGDVLPVPEKNLIFPDTSLPLEDCIVKYRSALLELLAATQQIDLVTLGLGPDGHIASIFPPLSEEDLKEQMNPNPIVLHTTTSRFAGFDRITVSLQLLCGAHQKVFFLKGDEKIRLWRDMQDDARSKSVAEFPALAVLQSGNVKVVAVPPLDVHEEHLQQQLRADRTFLSVVVLGASGDLAHKKTYPAL…	0	107.759	35	25	53	22	878	98.2	7.25	142.57	25	1.062	1.054	1.059	0.926	0.983	0.976	0.98	0.985	0.969	0.973	0.09	0.08	0.08	-0.11	-0.03	-0.04	-0.03	-0.02	-0.05	-0.04	0.43888	0.623133	0.554625	0.452181	0.494568	0.279709	0.0365983	0.0246843	0.00574895	0.591335	0.889498	0.902448	0.922119
FALSE	High	Master Protein	TGGT1_292920-t26_1-p1	transcript=TGGT1_292920-t26_1 | gene=TGGT1_292920 | organism=Toxoplasma_gondii_GT1 | gene_product=Putative heat shock protein 75 [Source:UniProtKB/TrEMBL;Acc:A0A125YFW1] | transcript_product=putative heat shock protein 75 | location=TGGT1_chrIa:3979-11415(+) | protein_length=861 | sequence_SO=chromosome | SO=protein_coding_gene | is_pseudo=false	MSLPSVGHPLSRLATTRLPGKSAVSLGPVIKEGSGKSSRRIVSSSCIQKNGEAETMPNPSRLGDSGNVRTPVMPPTASPIFSFHQAEASLPYSSAFPPVSTIHPACFIRWKRTNAGLFDNFGRGLATATFSGENGSESGGKSDATSATTNDGVADSEGEVHTFKAETKKLLHIVTHSLYTDKEVFVRELISNAADALEKLRFLQATAQVTDADGSEAMALEIHLSTDAAAKTFTLQDTGVGMTKAELLEHLGTIAKSGSLEFLMKHQGEKNADIIGQFGVGFYSAFVVSDRVDVYTRAHEEGAKAYLWSSDGAGEFNVKELSEEEASEAGLKRGTKIVCHLKKDCLEFSNIHHVKECATKFSSFVNFPIYVKEEDGKNTKITSQQALWLQTSATEDEHR…	0	107.499	29	23	50	23	861	95.1	6.13	137.96	23	1.027	1.026	1.037	0.957	0.983	0.982	0.992	0.991	0.983	1	0.04	0.04	0.05	-0.06	-0.02	-0.03	-0.01	-0.01	-0.02	0	0.77292	0.737983	0.597959	0.62059	0.239297	0.199001	0.701623	0.604912	0.465394	0.990958	0.902748	0.906531	0.922119
FALSE	High	Master Protein	TGGT1_248810-t26_1-p1	transcript=TGGT1_248810-t26_1 | gene=TGGT1_248810 | organism=Toxoplasma_gondii_GT1 | gene_product=Nuclear factor NF7 [Source:UniProtKB/TrEMBL;Acc:S7V0H2] | transcript_product=nuclear factor NF7 | location=TGGT1_chrXII:4119880-4123828(+) | protein_length=497 | sequence_SO=chromosome | SO=protein_coding_gene | is_pseudo=false	MTVATLFPKEEGVGFSLTTQSHGECKVRVDLPSSISQADWERIFSSRMFQDWLSVYATADRLRLLRVALESSQHCKSSGEEKLTSVAMLVEAADKEGEVFSGPVYLRPQRRAVLVLLRNTETRTDMCLFVKKPNLSVGLADTLELPEGEFEAETGRFVGPAAEEVERQLEATIYEKNLVNLTQVTFGGGGLALGGDLSFASLSHDGKANNASQEKGPHVAVGLSGGERVELYLYRANVSPETMAGIEARVGRLRRRGKQTPEVTTHKPGQSGVQLSLVQLGDAWGLVADAPAVSALFLVHELRYHRLMPKYRNPLAESSEEAKTSRPVQKAAATFKSVQDLEPTSKGLNLRVKVVSPKVVDRDRTFPSGRTSREGHMVVGDESAVITLKLVDQQMELPD…	0	107.459	37	15	47	15	497	54.2	7.02	160.39	15	0.998	1.014	1.007	0.988	0.986	1.001	0.995	0.978	0.996	0.962	0	0.02	0.01	-0.02	-0.02	0	-0.01	-0.03	-0.01	-0.06	0.966839	0.521612	0.853619	0.646682	0.399263	0.836218	0.734792	0.148312	0.692862	0.115801	0.983686	0.902448	0.948887
FALSE	High	Master Protein	TGGT1_258580-t26_1-p1	transcript=TGGT1_258580-t26_1 | gene=TGGT1_258580 | organism=Toxoplasma_gondii_GT1 | gene_product=Protein kinase domain-containing protein [Source:UniProtKB/TrEMBL;Acc:S7W7J7] | transcript_product=rhoptry protein ROP17 | location=TGGT1_chrVIIb:3287362-3289188(-) | protein_length=608 | sequence_SO=chromosome | SO=protein_coding_gene | is_pseudo=false	MELVLCFVIITISGVIRESSALLLRSPTSNDVFGELVASAERAQPLATRLTKRISRLNFNDREDDFWEDHGDASWNNSYTLVNGRTTLGSENRRRPASHSLIERPYYRDGRLSPVLGVQERRGRSVHSYHEEPVSFFDQRAFDEYTFRRRSQLHRQRARAGLRSRIKQNVRRLWTSARGAVRGWGRRVRRKIGDLFVGHLMPQLRRLRFWDQGLPPVVPPLIGNEPGQASVALVAERMEARLREKTLTEKNPTEAQQAVGTYLINSAENTWFISIPGGRYILLKKRGFLGGGGFGLVYHVEHPTTGQPFALKIFVQRVLSNKEGDRVSDLIEDEFGVMKYFPPEWTPARMYSELRFMVPLLKLRVLGKPEFQDARNHLRIFSVCALFPKAQGDLEEAAA…	0	107.434	29	14	68	14	608	69	9.57	168.5	14	1.041	1.065	1.058	0.957	0.996	1.019	1.012	1.015	1.008	1.029	0.06	0.09	0.08	-0.06	-0.01	0.03	0.02	0.02	0.01	0.04	0.604204	0.294885	0.48586	0.500541	0.824871	0.373426	0.427044	0.265626	0.287256	0.233749	0.889498	0.902448	0.922119
FALSE	High	Master Protein	TGGT1_232080-t26_1-p1	transcript=TGGT1_232080-t26_1 | gene=TGGT1_232080 | organism=Toxoplasma_gondii_GT1 | gene_product=Chorein_N domain-containing protein [Source:UniProtKB/TrEMBL;Acc:S7WJ08] | transcript_product=hypothetical protein | location=TGGT1_chrVIII:1804634-1839298(-) | protein_length=10329 | sequence_SO=chromosome | SO=protein_coding_gene | is_pseudo=false	MLTNILDQLIKTYGHEFLGDWDPINNFRIDSLAEPEVHLTNIPFPQQLFDLAEIPFAVDYSNIAKVRAKFSWQTFFGSPSSNPFTIEAEDLEIRLRLLYPSEWDAEHWLAKVLKAKRKRIDLWQKFASLFSTSVPDKKSLTQTIEPRIVNALKIHVKNIHVHLVDDNIHQTPFGFEFKIDEFLIDSPHRGDPRLSEVESTGSENCLLMGLWMRFVGFHLWFREFPRPQLRWRSGPSAFVKKAQDLRRRLRKNRGDTEARRELNLLLNREAEEAGEADGSQVSSGEQETGAAGSGGEGSGGEAFAQSLSSKKSGLQGSSQSLDFADCKTDRRDEEEREAPQTDGASGTSAPDSDGRPGGEWRTAFRKSNTTLRRRAYNVAFSTDGESEGCRAWELETTPH…	0	107.206	5	36	41	36	10329	1099.9	8.46	86.48	36	0.889	0.867	0.917	1.133	1.008	0.982	1.039	0.989	1.018	0.997	-0.17	-0.21	-0.13	0.18	0.01	-0.03	0.05	-0.02	0.03	0	0.58222	0.448053	0.753766	0.576026	0.455524	0.720352	0.609547	0.806604	0.0349424	0.965504	0.889498	0.902448	0.926621
FALSE	High	Master Protein	TGGT1_204400-t26_1-p1	transcript=TGGT1_204400-t26_1 | gene=TGGT1_204400 | organism=Toxoplasma_gondii_GT1 | gene_product=ATP synthase subunit alpha [Source:UniProtKB/TrEMBL;Acc:S7UU80] | transcript_product=putative ATPase synthase subunit alpha | location=TGGT1_chrVIIa:1716199-1723634(+) | protein_length=577 | sequence_SO=chromosome | SO=protein_coding_gene | is_pseudo=false	MTIHSCLARRAVSVAASGARAFASGLGARAVAVGALQSARLLHTSSLRAAGAKISPSEMSRLLEERIAGWKTQTSTEEVGRVVSVGDGIARLFGLEGVQAGELVEFQNGMTGMALNLETDNVGVVIFGDDRSVLEGDSVKRTGRIVDVPIGPGLLGRVVDALGNPIDGKGPIPAKERRRVELKAPGIIPRKSVHEPMMTGLKCVDALVPVGRGQRELIIGDRQTGKTAVAVDAIINQKEINDSTDDESKKLYCIYVAVGQKRSTVAQIVKALEQRDAMKYTTVVAATASEAAPLQFLAPYSGCAMGEWFRDSGRHCVIIYDDLSKQATAYRQMSLLLRRPPGREAYPGDVFYLHSRLLERAAKMGDKSGGGSLTALPVIETQAGDVSAYIPTNVISITD…	0	106.976	33	21	73	17	577	62.1	8.37	204.22	21	0.985	0.992	0.966	1.007	0.992	0.999	0.973	1.009	1.014	0.994	-0.02	-0.01	-0.05	0.01	-0.01	0	-0.04	0.01	0.02	-0.01	0.495799	0.0839966	0.501631	0.0714182	0.699868	0.219333	0.568258	0.430106	0.0433537	0.68639	0.889498	0.902448	0.922119
FALSE	High	Master Protein	TGGT1_232350-t26_1-p1	transcript=TGGT1_232350-t26_1 | gene=TGGT1_232350 | organism=Toxoplasma_gondii_GT1 | gene_product=Lactate dehydrogenase LDH1 [Source:UniProtKB/TrEMBL;Acc:A0A125YWC8] | transcript_product=lactate dehydrogenase LDH1 | location=TGGT1_chrVIII:2023599-2025126(+) | protein_length=329 | sequence_SO=chromosome | SO=protein_coding_gene | is_pseudo=false	MAPALVQRRKKVAMIGSGMIGGTMGYLCALRELADVVLYDVVKGMPEGKALDLSHVTSVVDTNVSVRAEYSYEAALTGADCVIVTAGLTKVPGKPDSEWSRNDLLPFNSKIIREIGQNIKKYCPKTFIIVVTNPLDCMVKVMCEASGVPTNMICGMACMLDSGRFRRYVADALSVSPRDVQATVIGTHGDCMVPLVRYITVNGYPIQKFIKDGVVTEKQLEEIAEHTKVSGGEIVRFLGQGSAYYAPAASAVAMATSFLNDEKRVIPCSVYCNGEYGLKDMFIGLPAVIGGAGIERVIELELNEEEKKQFQKSVDDVMALNKAVAALQA	0	106.695	60	17	143	17	329	35.5	6.38	370.91	17	1.007	1.007	1.009	0.995	1.002	1.001	1.004	1.007	0.992	0.996	0.01	0.01	0.01	-0.01	0	0	0.01	0.01	-0.01	-0.01	0.755201	0.86587	0.701011	0.759172	0.740365	0.957934	0.550078	0.442723	0.651412	0.631583	0.898755	0.948845	0.922119
FALSE	High	Master Protein	TGGT1_249530-t26_1-p1	transcript=TGGT1_249530-t26_1 | gene=TGGT1_249530 | organism=Toxoplasma_gondii_GT1 | gene_product=Importin N-terminal domain-containing protein [Source:UniProtKB/TrEMBL;Acc:S7V0R9] | transcript_product=putative exportin 1 | location=TGGT1_chrXII:4524784-4539887(+) | protein_length=1125 | sequence_SO=chromosome | SO=protein_coding_gene | is_pseudo=false	MSLSDPRALLDASIPFDDAKVALLDQVVAAMFGTTDNHSRDVAHKVLGEFKNMPEAWSYVAVILNKSQDANTKFVALQILENTIQTRWNVLPDAERNGIKVFVTDLVIRLASDEKACQTEKHFVNKVNENLIQIVKQEWPDRWPSFITEICQSSKASQSICENNMRLLNMLSEEVFDFGRSEMVSKKVEKLMTQLTAQFQEVFDVCMFVLKSFVVNAAAMKESLVQQTLKCLAHFLKWIPLGFVFETDLIETLLQHFWEPVQFRADCLRCVTEIASLQLSKEETQVFRERLAVLWLELVGKVLALPPQTLRFEDAGQVPPQMRLFWETIYCQLSLCLTAFLKNHRENIAEPLDKERNGQACVQMLQQVAAMTGLQHDETFQICLDFWFSFAEKLLNEVH…	0	106.424	26	29	66	29	1125	129	5.74	144.93	29	1.04	1.07	1.036	0.948	0.986	1.014	0.983	0.999	0.976	0.968	0.06	0.1	0.05	-0.08	-0.02	0.02	-0.02	0	-0.04	-0.05	0.579989	0.450453	0.648314	0.400757	0.450018	0.588901	0.53601	0.885016	0.145865	0.471977	0.889498	0.902448	0.922119
FALSE	High	Master Protein	TGGT1_293440-t26_1-p1	transcript=TGGT1_293440-t26_1 | gene=TGGT1_293440 | organism=Toxoplasma_gondii_GT1 | gene_product=hypothetical protein | transcript_product=hypothetical protein | location=TGGT1_chrIa:306622-308238(-) | protein_length=538 | sequence_SO=chromosome | SO=protein_coding_gene | is_pseudo=false	MAANPSTVEEAAITDKSPLVAKEETKQKPESSPAHESDPLIKQKEEVAPMVKQSEESQPMVKQNEESQPMVKQSDESQPMVKQSEESEPAVSQNGGPEPMTQKNEESEPVVKQNEEPEPAVGQNGESEQLGKDIEKAESMVKEKEESEPMVKENEEPQPTAAADKPAVNAQLLVDRGIAEERARQAMKDARSRIKKLSLMVSTVMIQFIFLGVVVFFCFAPMFSCLSMTFIGLGLISGTFGLLCVCCKSRIGTIFYLLLGIVCLLFLLVCWAFYAYMLYKATLTAIAAGQDKVNAWVEDTTGGLIPQGNGGIFDIGKHLDNLPLPGDIESLKDQLGKFTKSEENSGSLIGAKSKENGGSLIGGMATAALLKECKKGIEEEGSDYMDDVQSVFFALASYG…	0	106.162	38	17	47	17	538	58.7	5.21	127.64	17	1.098	1.1	1.109	0.925	1.015	1.017	1.026	1.001	1.009	0.998	0.13	0.14	0.15	-0.11	0.02	0.02	0.04	0	0.01	0	0.418501	0.368802	0.309951	0.518847	0.397498	0.567906	0.537034	0.406213	0.750839	0.823788	0.889498	0.902448	0.922119
FALSE	High	Master Protein	TGGT1_313430-t26_1-p1	transcript=TGGT1_313430-t26_1 | gene=TGGT1_313430 | organism=Toxoplasma_gondii_GT1 | gene_product=hypothetical protein | transcript_product=hypothetical protein | location=TGGT1_chrXI:3334289-3356350(+) | protein_length=5639 | sequence_SO=chromosome | SO=protein_coding_gene | is_pseudo=false	MSLFGGGGGSSGTAPGSKSLFGATTSGTSSGLLGASSSSSSSLFGGGGSSLFGNSSSSIFGAGSTAKPAQTPGLFGSGATSSSFSASPSSLFGSAGATEKPAASGGLFGSTGANSSSSLFSGGGAASAATSGGGLFGSAASGSASSSSSSSSSSLFGGGGGAANPAASGGLFAGTGASSSSSSSSSLFGSGSSAEKPTASGGLFASPGANASSSLFSGGSTATGTSGGGLFGNAASANSSSSSSSSSSSSSSSSSSLLFGSGGATETPATSGGLFGSKGANSSSSLFSGAGTASTGTSKGGLFGNATSASSSSTSSASASSSSSSSSSSSLFGSAGATEKPAASGGLFGSTGANSSSSLFSGGGAASAATSGGGLFGSAASGSASSSSSSSSSSLFGGG…	0	105.908	7	29	37	29	5639	593	6.8	84.43	29	0.991	0.926	0.995	1.001	0.993	0.928	0.996	0.975	1.004	0.959	-0.01	-0.11	-0.01	0	-0.01	-0.11	-0.01	-0.04	0.01	-0.06	0.825604	0.0626395	0.921658	0.969147	0.0555874	0.299018	0.821827	0.274047	0.523413	0.32182	0.925148	0.902448	0.970857
FALSE	High	Master Protein	P14625	Endoplasmin OS=Homo sapiens (Human) OX=9606 GN=HSP90B1 PE=1 SV=1	MRALWVLGLCCVLLTFGSVRADDEVDVDGTVEEDLGKSREGSRTDDEVVQREEEAIQLDGLNASQIRELREKSEKFAFQAEVNRMMKLIINSLYKNKEIFLRELISNASDALDKIRLISLTDENALSGNEELTVKIKCDKEKNLLHVTDTGVGMTREELVKNLGTIAKSGTSEFLNKMTEAQEDGQSTSELIGQFGVGFYSAFLVADKVIVTSKHNNDTQHIWESDSNEFSVIADPRGNTLGRGTTITLVLKEEASDYLELDTIKNLVKKYSQFINFPIYVWSSKTETVEEPMEEEEAAKEEKEESDDEAAVEEEEEEKKPKTKKVEKTVWDWELMNDIKPIWQRPSKEVEEDEYKAFYKSFSKESDDPMAYIHFTAEGEVTFKSILFVPTSAPRGLFD…	0	105.608	32	26	59	23	803	92.4	4.84	135.15	26	1.035	1.042	1.038	0.974	1.008	1.015	1.011	1.007	1.006	0.995	0.05	0.06	0.05	-0.04	0.01	0.02	0.02	0.01	0.01	-0.01	0.112644	0.0585124	0.401357	0.087054	0.55581	0.00622986	0.72228	0.648448	0.681513	0.889484	0.889498	0.902448	0.922119
FALSE	High	Master Protein	TGGT1_297720-t26_1-p1	transcript=TGGT1_297720-t26_1 | gene=TGGT1_297720 | organism=Toxoplasma_gondii_GT1 | gene_product=CBM20 domain-containing protein [Source:UniProtKB/TrEMBL;Acc:S7VZF6] | transcript_product=trehalose-phosphatase | location=TGGT1_chrII:1916468-1928938(+) | protein_length=1222 | sequence_SO=chromosome | SO=protein_coding_gene | is_pseudo=false	MLYTRVFFRAVVRTDFGERVAVVGSSPSLGNWQAEHGHELTTNEDVFPSWFSKEPVYLPLKKPISYKYVVLDERGDIVRWEECEGNRELVPTGLEMTVEDDDGLFREQMTNRGDHGVEGDDDVSVAALDKEEVDARNRMLAIQEEEPEFDENDSVIVCALDLPLRVVRVSPSREASPLPSSLPASSTDSSGQTEKRAVSFPEDAGASARRSSSTVAATREEETTRTASSFPKVEETAERGRDSSLALWPGAARDAAGDFGEALQPRATRSRRGTFEVRPSKSALLPSLFHLRKKTRLPVRFVGWPGIHVENEEEQAEIAELLRAYDCSPIFPDKDEFDCHLTFCHQVLWPLFHNVVVLDSNTQVPFDSDLWAKYQAVNKLWADAVLRQAHETDMVWVHD…	0	105.559	23	26	46	26	1222	136.6	6.25	97.14	26	1.015	1.01	1.01	1.024	1.039	1.034	1.035	1.045	1.019	1.036	0.02	0.01	0.01	0.03	0.06	0.05	0.05	0.06	0.03	0.05	0.490932	0.834507	0.707364	0.134645	0.15048	0.473034	0.277177	0.300086	0.473392	0.017454	0.889498	0.933725	0.922119
FALSE	High	Master Protein	TGGT1_256980-t26_1-p1	transcript=TGGT1_256980-t26_1 | gene=TGGT1_256980 | organism=Toxoplasma_gondii_GT1 | gene_product=PlsC domain-containing protein [Source:UniProtKB/TrEMBL;Acc:S7UZ60] | transcript_product=glycerol-3-phosphate-acyltransferase | location=TGGT1_chrVIIb:4232332-4243743(-) | protein_length=1002 | sequence_SO=chromosome | SO=protein_coding_gene | is_pseudo=false	MYFLVRWLCIGIVRSFFKEVAVLHPERIPLYGPAIFVGNHNNQFMDASMLVANIPRQVHFLVALKSMKRRVIGFLSRLAGCIPVDRQDDRAFKGPGLVRISHHFTEDGHVCPRPPHHHHHARPHAADPGHSNGSESREKRDGGGGRPPETATEERQTPHADTGALHTPSGAVQAGSIPLSGEAEAARRSAFEETAGGTSEARMETKNEEDPREPQTREEGPSAESAAIPEAQTPELRAHTRGESPAKLLAGEMLQAFSRVPSHPSLRTEMPLFSKSASAPLGMQNPPVLSILGNSTRFLSDVRPGYKLRLDGKDFLVLRVLSDTHVVVRQPPEAPRRLDSSPLPTAAAPGGRTPETAGAVCELDRKTAERRGDAVARQANAQLAKEKESEREAKMGRRR…	0	105.473	28	24	47	24	1002	110.2	8.78	114.94	24	1.018	1.007	1.005	1.01	1.029	1.017	1.016	1.011	0.995	1.013	0.03	0.01	0.01	0.01	0.04	0.02	0.02	0.02	-0.01	0.02	0.634479	0.697285	0.706007	0.663656	0.21771	0.168431	0.27778	0.542027	0.616556	0.567837	0.889498	0.903402	0.922119
FALSE	High	Master Protein	TGGT1_239752-t26_1-p1	transcript=TGGT1_239752-t26_1 | gene=TGGT1_239752 | organism=Toxoplasma_gondii_GT1 | gene_product=hypothetical protein | transcript_product=hypothetical protein | location=TGGT1_chrVI:884973-888129(+) | protein_length=905 | sequence_SO=chromosome | SO=protein_coding_gene | is_pseudo=false	MGSCQADCQFPTWHPRMKSMRFRNAAPPKVCLLVFLLASTVFVAFGSCETSNGDSVEVQKCATLNRVAEPLPFLQKKTLFLIANEPVLESHVVSNLLHQLLYTLQVPNSHVQLLDEVLLSEHGKTSHATVLPWLLNVYRELPAGIEFVWLGTAYSRIVGPSLEKLMALLVSEAQEMNPRSREWYPLGLCAGYGLKDPVLSRTHHFYQDDAFVYPFLDAGLLMDRKFLRFLDQTVKEEGTKLPPRIEIDPIHELFKFLYQTRGFLMQHSNMFCPSSPISRDFDRAEVLYPPKHKRPTNGATPRAQGNDDASDAGGEYKGGAAKGMLGSRRSPALSTAEKKHIQGCVSFGVGCRHSPILSHQFFDRMMEFEHDIMERKEALAEQYPIGADVSDDHPEFREK…	0	105.162	29	22	57	22	905	102.1	6.37	140.06	22	0.993	1.021	1.02	0.998	0.991	1.018	1.017	0.994	0.999	1.024	-0.01	0.03	0.03	0	-0.01	0.03	0.02	-0.01	0	0.03	0.543498	0.520423	0.0500457	0.804675	0.0154289	0.651923	0.323018	0.378119	0.940173	0.684683	0.889498	0.902448	0.922119
FALSE	High	Master Protein	P11021	Endoplasmic reticulum chaperone BiP OS=Homo sapiens (Human) OX=9606 GN=HSPA5 PE=1 SV=2	MKLSLVAAMLLLLSAARAEEEDKKEDVGTVVGIDLGTTYSCVGVFKNGRVEIIANDQGNRITPSYVAFTPEGERLIGDAAKNQLTSNPENTVFDAKRLIGRTWNDPSVQQDIKFLPFKVVEKKTKPYIQVDIGGGQTKTFAPEEISAMVLTKMKETAEAYLGKKVTHAVVTVPAYFNDAQRQATKDAGTIAGLNVMRIINEPTAAAIAYGLDKREGEKNILVFDLGGGTFDVSLLTIDNGVFEVVATNGDTHLGGEDFDQRVMEHFIKLYKKKTGKDVRKDNRAVQKLRREVEKAKRALSSQHQARIEIESFYEGEDFSETLTRAKFEELNMDLFRSTMKPVQKVLEDSDLKKSDIDEIVLVGGSTRIPKIQQLVKEFFNGKEPSRGINPDEAVAYGAA…	0	104.935	42	24	64	20	654	72.3	5.16	185.06	24	0.878	0.884	0.899	1.16	1.018	1.025	1.043	1.047	1.06	1.043	-0.19	-0.18	-0.15	0.21	0.03	0.04	0.06	0.07	0.08	0.06	0.543463	0.607844	0.658736	0.558705	0.646122	0.106438	0.0178441	0.146172	0.233476	0.0426723	0.889498	0.902448	0.922119
FALSE	High	Master Protein	TGGT1_231440-t26_1-p1	transcript=TGGT1_231440-t26_1 | gene=TGGT1_231440 | organism=Toxoplasma_gondii_GT1 | gene_product=LsmAD domain-containing protein [Source:UniProtKB/TrEMBL;Acc:S7WJ46] | transcript_product=LsmAD domain-containing protein | location=TGGT1_chrVIII:1418874-1426956(-) | protein_length=1524 | sequence_SO=chromosome | SO=protein_coding_gene | is_pseudo=false	MGKTDAQSPSSGPAGRPESGRKSVTPAEVNELRLNYCMAVLAGREVRVNLENGGRVQGLFHAYEKKDRKDGQEGSLVLSCARDLPSKTRVSGEIKRQMHLPDRCFVSFHATDVPLAPSGPAGPASGSSSGLQGAAVHAGSGFQTDTQISAHSGKRFNDRSTRGGAGQPRELQKWVGDGSRGEDTFGALEPAGGAGARRVNGGTASDWDQFAVNEQRFGVRSSYKEELYTTKLDLDAIPLQVQQQADRIATELEKQQQGTRDGAVDDSRGVEDEEALFSAVTGTGGYSQHRRAPPDGPGPGVPSSSRSSSSCGADSGVGGGARGSSRNTASSGSFPHVMASGAHANKSGAAGGGLSATGERGGDRGAASSAAVSASGSANRSGGVGAQGKGVAGAHASGS…	0	104.783	19	24	49	24	1524	148	9.44	137.16	24	0.907	0.889	0.915	1.1	0.998	0.978	1.007	1.013	1.01	1.013	-0.14	-0.17	-0.13	0.14	0	-0.03	0.01	0.02	0.01	0.02	0.305499	0.383189	0.481459	0.355752	0.834329	0.485758	0.813977	0.457239	0.454594	0.812783	0.889498	0.902448	0.922119
FALSE	High	Master Protein	TGGT1_312110-t26_1-p1	transcript=TGGT1_312110-t26_1 | gene=TGGT1_312110 | organism=Toxoplasma_gondii_GT1 | gene_product=Thioredoxin domain-containing protein [Source:UniProtKB/TrEMBL;Acc:S7UTI6] | transcript_product=apicoplast-associated thioredoxin family protein Atrx1 | location=TGGT1_chrXI:2396639-2404968(-) | protein_length=790 | sequence_SO=chromosome | SO=protein_coding_gene | is_pseudo=false	MRHGPCFTCTHKFSCPSFLRNGVVSALALLFPKTAAVVESLSSPVSVSMAPDSCRPDPVGAPNGRGSLKEVSSSFCTTSSLFSRLSLLFLLFSLFASPRQLSLTSAISLEPSPGSPAAAQVSSGVAPKPVEKESGNGGQVKVHLKRDEAGRPLPVSAASLFAAEKPHEEEEREVLRVGVDAGDSRREKRAVEPTRMLASIDPQHPSVSAQVVSPPPSSSLTAPPTARPRDEGNNTCVRNNETCQRRERYAEKSIQRHRHDSTSSRESVAFASFGSSKNSFATAYAPFDDEDEEGALAHLKNKVKTAVSCPAAKILLGISGVVALGTLGIKYTRNVLRRRRREGLQRPPTPFTDLLGHVLLKRERGKHAAETRELATGDVLGKPGSVTALYFSGRGVEEM…	0	104.505	28	18	38	18	790	86.9	7.81	101.4	18	1.018	1.012	1.021	0.981	0.998	0.993	1.002	1.039	1.022	1.021	0.03	0.02	0.03	-0.03	0	-0.01	0	0.06	0.03	0.03	0.847325	0.826235	0.724605	0.681487	0.971972	0.515101	0.891093	0.0685386	0.315666	0.0243696	0.933609	0.931625	0.922324
FALSE	High	Master Protein	TGGT1_247760-t26_1-p1	transcript=TGGT1_247760-t26_1 | gene=TGGT1_247760 | organism=Toxoplasma_gondii_GT1 | gene_product=AMP-binding domain-containing protein [Source:UniProtKB/TrEMBL;Acc:S7WH93] | transcript_product=AMP-binding enzyme domain-containing protein | location=TGGT1_chrXII:3496035-3507081(-) | protein_length=793 | sequence_SO=chromosome | SO=protein_coding_gene | is_pseudo=false	MSGVQEDQKRQPGVVGRLSPRRAWSGIYAVPVEGVPKKEGESAVYRCVESEQSGVPVKTLPAVLEDFPEIRSPFDTLYCAAQAFSNDPFLGVREKLPLPVFPATSQEETDTGTGSSATTAKTPEARPACADGEVPATGQKGVSSSKTSPGGERLATGGTTPATSPSKDCTSGLQSTPSAPSFGESCRKSCLGFGEYKWLSYQETLKQVQSLAWALSNEVDIPVCLFGDDAEVQENYRFAGIWARSSAAWRITDYACNAAKIVSVPLYDTLGHEALLYIIGLTKLQVLFVEGAKLHPALNLVTEEKVPLKAVICFDSVTPEEVEEFAAHSVKLYAFDDLIHKGMGEKHERPELSLDDVCTVIFTSGTTGVPKGVVHTNGGFVATIAGYVGCNNRMNLRRG…	0	103.701	33	22	48	22	793	86.9	6.7	143.93	22	0.969	0.965	0.969	1.029	0.998	0.993	0.997	0.992	1.009	1.009	-0.04	-0.05	-0.05	0.04	0	-0.01	0	-0.01	0.01	0.01	0.194613	0.105285	0.392171	0.450388	0.894805	0.779166	0.435542	0.731242	0.224994	0.0810053	0.889498	0.902448	0.922119
FALSE	High	Master Protein	TGGT1_225125-t26_1-p1	transcript=TGGT1_225125-t26_1 | gene=TGGT1_225125 | organism=Toxoplasma_gondii_GT1 | gene_product=Pre-rRNA processing protein [Source:UniProtKB/TrEMBL;Acc:S7W597] | transcript_product=pre-rRNA processing protein | location=TGGT1_chrX:2378306-2392984(+) | protein_length=2871 | sequence_SO=chromosome | SO=protein_coding_gene | is_pseudo=false	MAQTQRGRPGFLSVNAAFSDAADFPRAAPRRSSAKSGGASQAASRRAPAQYAPFASSFPSSPAAFSPAAVAGEVRRREKLAQRARGAARPEPDSEVCAPQSGEHLERLARPVEAETVSPGSLLLGIVAEVHTSELIVHLPFGMMGCVPRSQTQEESTPSFASARVCGEGLGDASEVPGARDGKPHAQTFLPLSRSHYVGQVVQTVVLGGGKEGREEEGDWRRHSQNSRVLLLSLRPSLFNAGLSANSLAPGMVVPATVAAVEEHGYMLSFGVDSLSGFLPFAELATGSAAAPERNVDTDAALPLHSVLSVRVAKVSKAAKVIICALPGEQETAETLETPEAPRGESRKKQKTTAADSREAASSGGQSPGNSKRTPEVPASLKTSLDWSSIKPGLLVQAK…	0	103.499	13	32	51	32	2871	310.5	8.07	116.95	32	0.925	0.962	0.927	1.089	1.007	1.047	1.01	1.042	0.998	0.993	-0.11	-0.06	-0.11	0.12	0.01	0.07	0.01	0.06	0	-0.01	0.449151	0.714545	0.456687	0.454219	0.508529	0.100677	0.434011	0.262996	0.563963	0.927834	0.889498	0.903474	0.922119
FALSE	High	Master Protein	TGGT1_225860-t26_1-p1	transcript=TGGT1_225860-t26_1 | gene=TGGT1_225860 | organism=Toxoplasma_gondii_GT1 | gene_product=hypothetical protein | transcript_product=hypothetical protein | location=TGGT1_chrX:1897405-1902365(-) | protein_length=1057 | sequence_SO=chromosome | SO=protein_coding_gene | is_pseudo=false	MDAEMRLGVGRADCRHSSRRPNLSSGNISFQNLVLLSVCCVSVGIAGGPLCRQVAGLSLPSSSVSRAFIPKLDPSLLSPTRHSVESSEMPDSARDFSALSRGESLSHSAFESTGEGDPSSRTTFRSSSAVSAEAAFPAATEGVLTRLGSGRGGRRRSRDRAGAAASTLLPTFGFSFTEKRGEDGSAAGSEAKGNSESAQTDQKSQHESADVKESSSATAENKSSDDFPESSSDYHPLRGLFHRMLSPVIPFLSPPPIRSATRMTILSPVNFLHSLWTPRISIITSVRNEDEKDEESSASESSEKQAGASGETSTTTTTTTTVSTSSVDESETSGASESAASGVEHEQKTGGSATEARDQPRAPEGAAEVQETAQAAEENGTAEEATRGAEAASPETTRG…	0	103.425	30	23	32	23	1057	111.4	4.75	90.59	23	0.836	0.851	0.824	1.181	0.987	1.005	0.973	0.997	0.986	1.049	-0.26	-0.23	-0.28	0.24	-0.02	0.01	-0.04	0	-0.02	0.07	0.493817	0.535157	0.441851	0.525993	0.204397	0.0610127	0.38692	0.85334	0.313344	0.566095	0.889498	0.902448	0.922119
FALSE	High	Master Protein	TGGT1_209600-t26_1-p1	transcript=TGGT1_209600-t26_1 | gene=TGGT1_209600 | organism=Toxoplasma_gondii_GT1 | gene_product=hypothetical protein | transcript_product=hypothetical protein | location=TGGT1_chrIb:1372263-1374087(-) | protein_length=451 | sequence_SO=chromosome | SO=protein_coding_gene | is_pseudo=false	MLSVDGVHFARRNCVVVVVTCPDTSVDFISGVPVSATGFASSVQPPQQVFSEFRDVSSDLRFAVATTMAKNTLETGDSLRLLSFDELFKSSEVKTIQKFQGFKRQNTLKGDTRAKNELLSVLRQQRVLVDDNAIHFIAEARSESKADARNSVFKLAQKYKVLPDTENVKKIKQLFGKVMEDDSGDEDWEPSFRRLPDCLKTKRALKFMEDDVSHDILLGEIGTIEDESSNLGGDVVTLETVKEEPEEVMGRVIDTQAGELGLSLGGAEGTSHAKEAQESSDDEDEDDAHFDGEDLKVLNDMQKEFIGNNLTAWLKDIRKAYETGVKLVKVNALGYKFIRIVTLKEMVLSIRQPHTHSKVKVERQAVITEIVAVKLGRDSKEFRALDQLVDEGKEAADTN…	0	103.398	44	19	67	19	451	50.2	5.3	189.03	19	0.881	0.879	0.878	1.126	0.991	0.99	0.988	1.009	1.002	0.998	-0.18	-0.19	-0.19	0.17	-0.01	-0.01	-0.02	0.01	0	0	0.468556	0.456192	0.394874	0.479461	0.282947	0.0608635	0.62309	0.492412	0.880454	0.888223	0.889498	0.902448	0.922119
FALSE	High	Master Protein	TGGT1_222100-t26_1-p1	transcript=TGGT1_222100-t26_1 | gene=TGGT1_222100 | organism=Toxoplasma_gondii_GT1 | gene_product=hypothetical protein | transcript_product=hypothetical protein | location=TGGT1_chrII:851582-855004(-) | protein_length=1140 | sequence_SO=chromosome | SO=protein_coding_gene | is_pseudo=false	MVSCLHTKMMGPAPTAVRFCFGGLRQGFIFVLFTTFHWVVDLPASPVEGLSPIQKSFLVQFGRTEPSLDQSREGVVAAFKFESLRQVFQASRGEEFDNDTVRRTVLLGRQTFDSIMQQTLSQHSDNPTEARLHSGSGNHSPLPSFTIDSISTMTLGGIESLQFFCSVDRVEGSEDSAIRCIPQPQALPGSLRVGFIFQLLPSTDKVFTSQSSATSPPFCRIVHDSTRSEFPSFLDAAIGICAAFGYENQLIVQDGNPALDLLPDLYPEGLPSKGFESVPARYVKPYHSLSFVGLKPVDAVPSENHKHHSQADFLPNEELDTLSWRGVAVSSSVYEKALGRLKAAVRNAVISEATEVRDCTLHVGQPAQYEAVLKKVAGSACLPGKNFLQCLDAIRMGPY…	0	103.384	30	27	42	27	1140	128.1	6.32	122.04	27	0.909	0.912	0.932	1.118	1.017	1.02	1.042	0.989	1.028	0.998	-0.14	-0.13	-0.1	0.16	0.02	0.03	0.06	-0.02	0.04	0	0.693198	0.646687	0.691329	0.553754	0.793606	0.436187	0.0201682	0.372194	0.0776716	0.426075	0.889498	0.902448	0.922119
FALSE	High	Master Protein	TGGT1_318430-t26_1-p1	transcript=TGGT1_318430-t26_1 | gene=TGGT1_318430 | organism=Toxoplasma_gondii_GT1 | gene_product=Malate dehydrogenase MDH [Source:UniProtKB/TrEMBL;Acc:S7UKG5] | transcript_product=malate dehydrogenase MDH | location=TGGT1_chrIV:1282502-1286316(-) | protein_length=511 | sequence_SO=chromosome | SO=protein_coding_gene | is_pseudo=false	MQDPSGHGNRPRAALVQLQESWVCCAAPNSVFSADIRTVAQMFSPPCASRRPRVGFSQATLCAGRLPVSRFCSLLSFSDLPPRQDTRLFPSSFLNGVASEKTLAFLPYPLPRESVSGGSVQAPGAPVSGVRHDKFAFRLSPGSRPGSVSRFRFHRPSSSATAARHLQGESRPFASCPVTPEATPFPQPVPSSFFKMSRRKIGLIGGGNIGATLALLSAVKELGDVVMFDVVQDLPQGKCLDLYQLTPISGVDVRFEGSNDYSVLKDADVIIVTAGVPRKPGMSRDDLLAINAKIMGQVGEAIKQYCPNAFVICITNPLDVMVYILREKCGLPPHKVCGMAGVLDSARLRTFLSERLNVSVDDIHALVMGGHGDTMVPLPRFTTVGGIPLPELVKMGMIS…	0	103.345	40	14	54	14	511	54.7	8.68	173.21	14	1.002	1.012	1.013	0.998	1	1.011	1.011	1.021	1.011	1.048	0	0.02	0.02	0	0	0.02	0.02	0.03	0.02	0.07	0.970119	0.384163	0.46915	0.843565	0.996392	0.107817	0.650294	0.490858	0.619897	0.479238	0.984142	0.902448	0.922119
FALSE	High	Master Protein	TGGT1_242070-t26_1-p1	transcript=TGGT1_242070-t26_1 | gene=TGGT1_242070 | organism=Toxoplasma_gondii_GT1 | gene_product=cAMP-dependent protein kinase regulatory subunit [Source:UniProtKB/TrEMBL;Acc:A0A125YLM5] | transcript_product=cAMP-dependent protein kinase regulatory subunit | location=TGGT1_chrVI:1804976-1810461(-) | protein_length=385 | sequence_SO=chromosome | SO=protein_coding_gene | is_pseudo=false	MGNVCECQKAEIVNEVSLAAPVVTKGSKGKGATGSSSSGQKASGSKAASSNSSTVVPQLTEDDLDTEDEKDDDVVEEMPQPSEAYMSRAKNRQSVSAEAYGEWNKRKKFVAPVYPKTAEQKERITKVIESSFLFSSLDIEDLETVINAFQEVSVKKGTVIIRQGDDGDRLYLIETGEVDVMKKFPGEKENKFLCKMHPGDAFGELALMYNAPRAATVIAADDMLLWALDRDSFTNIVRDAAAKKREIFEESLKEVRILEDMDPYERSKLSDALRTATYEDGDVIIKEGETGDTFYILLEGAAEAIKNDKVVMEYKKGGFFGELALLKDQPRAATVVAKSHVQVAYMDRKSFKRLLGPVEQILMRNQDNYRKAMKQLGLDTKYLDK	0	103.292	47	17	80	17	385	42.8	5.21	223.01	17	1.183	1.152	1.171	0.842	0.996	0.97	0.986	0.978	0.996	0.994	0.24	0.2	0.23	-0.25	-0.01	-0.04	-0.02	-0.03	-0.01	-0.01	0.533747	0.564771	0.540575	0.507625	0.763427	0.0523349	0.135277	0.264799	0.869294	0.835858	0.889498	0.902448	0.922119
FALSE	High	Master Protein	TGGT1_265840-t26_1-p1	transcript=TGGT1_265840-t26_1 | gene=TGGT1_265840 | organism=Toxoplasma_gondii_GT1 | gene_product=hypothetical protein | transcript_product=hypothetical protein | location=TGGT1_chrIX:1241089-1248136(+) | protein_length=1332 | sequence_SO=chromosome | SO=protein_coding_gene | is_pseudo=false	MRPAVPQSPVPLSFPPPASLASPLCPFSVRCPGEILRVSSVQMAHPSEPPPHVRGEWTSVQQRRRHLLFSSLSPPSPGTHASPPFPLPSAHAAPFASNGVSPLHDSTEPLLSGERRSSQTQRGGPERTDGGERGERGRRGSPETLNAALKAAGEMVKYAASQWERAASQSESLVAALKVSLEKETVSRRRVEELEAQLTAQEQRMQLEEQRRELEREEEKEKNLLSAEVTSLREQLRSASNLAAEQQLKVETELSVLRGELRRREEEICEHMLQLEKVHVINQGLQQQVAELLSFREAGSACTASRSSSPQSPLPENCAALPAAERQKRVETLGAAAESYASEMQTKLASLRSLLDSGAGKKDLAPESTDAERRRGQATESQALHDELERMKKQLEAAE…	0	102.835	26	32	46	32	1332	148.4	5.6	104.53	32	0.902	0.904	0.888	1.125	1.015	1.017	1	1.022	0.997	0.993	-0.15	-0.15	-0.17	0.17	0.02	0.02	0	0.03	0	-0.01	0.454133	0.458355	0.41281	0.450057	0.421257	0.397086	0.976333	0.694903	0.753265	0.386347	0.889498	0.902448	0.922119
FALSE	High	Master Protein	TGGT1_206590-t26_1-p1	transcript=TGGT1_206590-t26_1 | gene=TGGT1_206590 | organism=Toxoplasma_gondii_GT1 | gene_product=Calcium-dependent protein kinase CDPK2A [Source:UniProtKB/TrEMBL;Acc:S7W2U0] | transcript_product=calcium-dependent protein kinase CDPK2A | location=TGGT1_chrVIIa:775466-782202(-) | protein_length=786 | sequence_SO=chromosome | SO=protein_coding_gene | is_pseudo=false	MRDPFVNFCSDPLSFSQKLQRLYSAGASLCIFNPNLRNFPSDHVVPLAPRYMPEQSEVMGGRISRQRGGAQSQAPDPRHPNSSSTSGVARLGQSASPADRKVSSRHPHVAGQPHMSSRLQAPTPSQRGTSPASSEAGDQRSSSSGRTSAGRSRGAGLFSSTSTQKSKPSQSAKSTSATATLSPQPYTPTPESHRGGTGASPVTGRSPVSGTGKRCVPSPGAGAAAARDEAHSRHVIRHPSDSRQVAEAPISRDKEGGIDRSKFILENTGALTDFYEIDTATLGQGTYGSVSKARKKDTGQMRAVKTISKSQVKNLERFRQEIAIMKELDHPNVIKLFETFEDHRNIYLVMELCTGGELFDRIISEGRLTEKQAAVLMKQMFSAVHYLHSNNIMHRDLKP…	0	102.671	34	26	62	26	786	86.3	8.76	165.33	26	0.988	0.999	0.99	0.997	0.985	0.996	0.987	0.971	0.998	0.975	-0.02	0	-0.01	0	-0.02	-0.01	-0.02	-0.04	0	-0.04	0.0997831	0.985521	0.723181	0.930219	0.675578	0.446565	0.33602	0.150052	0.940316	0.426193	0.889498	0.994259	0.922119
FALSE	High	Master Protein	TGGT1_289650-t26_1-p1	transcript=TGGT1_289650-t26_1 | gene=TGGT1_289650 | organism=Toxoplasma_gondii_GT1 | gene_product=PEP-carboxykinase I [Source:UniProtKB/TrEMBL;Acc:A0A125YIU7] | transcript_product=PEP-carboxykinase I | location=TGGT1_chrIX:3173228-3176423(+) | protein_length=677 | sequence_SO=chromosome | SO=protein_coding_gene | is_pseudo=false	MNYTMHLSRNVLREVYRFLPGRGFLPAQGSTASRVRHSLADKEFPCCSRSETCGLHIAEVRHTFFRQLRGSSGVNRKSSDAQRQFVVQFSRSVRKMNRTQSSGSLKDSISFLEMLKKQIDANLQHHKPGDCPLTKKDILDLGQLQKEIDFQENVQAVGITCAQLFHNTAPSVLYEQALKKEAGSLIASSGALCVSSGLKTGRSPADKRIVEEPSSRDDVWWGKVNIPFCEKSYLVNRERAVDYLNLQDQLYIVDAFAGWDPEYRIKIRVITTRAYHALFMQNMLVMPTAEELENFRPDFTIYNAGCFPANRFTNGVTSQTSVAMNLGAGEMVILGTQYAGEMKKGILTLMMYLMPKRGQLPLHSSCNVGPKGDVTLFFGLSGTGKTTLSADPSRQLIGD…	0	102.638	30	18	67	18	677	75.3	8.15	161.91	18	1.083	1.106	1.105	0.915	0.991	1.012	1.012	1.031	1.012	1.002	0.11	0.15	0.14	-0.13	-0.01	0.02	0.02	0.04	0.02	0	0.533068	0.321965	0.437801	0.496279	0.0619407	0.761721	0.256275	0.368246	0.114817	0.839495	0.889498	0.902448	0.922119
FALSE	High	Master Protein	TGGT1_255190-t26_1-p1	transcript=TGGT1_255190-t26_1 | gene=TGGT1_255190 | organism=Toxoplasma_gondii_GT1 | gene_product=Myosin motor domain-containing protein [Source:UniProtKB/TrEMBL;Acc:S7WI35] | transcript_product=myosin C | location=TGGT1_chrVIIb:4925758-4933694(+) | protein_length=1171 | sequence_SO=chromosome | SO=protein_coding_gene | is_pseudo=false	MERKQTQMILGRRLAKDSPEVKHFQRKSSVVPFGRDGRAATNFTCWTADCPAVKADPTLVFAKCIVVGGSMDTQLELEQVDPPARGTFTVAPTDVFNANELIEPETVDDIGYLPHTNVACVLDVLKSRFLRSIIYTTAEPLLVAINPFKDLGNTTDAWISTYRNASKPEMLPPHVFKTARAALEDLEGYKKNQSIIVSGESGAGKTEATKQIMRFFASASSEVRTTIQDTIMAGNPILEAFGNAKTIRNNNSSRFGRFMMLDVSSHRGIQHGSISNFLLEKVRVVSQEANERSYHIFYQLLKGATSEMRAKYHLRSLKEYAYLNGKNGGCYDVPGIDDKADFEEVLQSLDAMQITGSKRHSVFSILSGLLLIGNVSIEGKDAQGVPDAAYISPQSEEIL…	0	102.026	25	27	49	27	1171	132.6	7.91	124.14	27	0.986	1.018	1.017	1.013	1	1.032	1.03	1.003	1.013	1.011	-0.02	0.03	0.02	0.02	0	0.05	0.04	0.01	0.02	0.02	0.0258882	0.578061	0.484157	0.591281	0.983357	0.115656	0.0396672	0.508368	0.100571	0.711561	0.889498	0.902448	0.922119
FALSE	High	Master Protein	TGGT1_360830-t26_1-p1	transcript=TGGT1_360830-t26_1 | gene=TGGT1_360830 | organism=Toxoplasma_gondii_GT1 | gene_product=Nucleoside-triphosphatase [Source:UniProtKB/TrEMBL;Acc:S7UZG2] | transcript_product=nucleoside-triphosphatase | location=AAQM03000066:41-1153(+) | protein_length=370 | sequence_SO=contig | SO=protein_coding_gene | is_pseudo=false	MIDEYGVKHCRNDLAGVVEVGGASAQIVFPLQEGTVLPSSVRAVNLQRERLLPERYPSADVVSVSFMQLGMASSAGLFLKELCSNDEFLQGGICSNPCLFKGFQQSCSAGEVEVRPDGSASVNEDVRKNRLKPLATYCSVHNPEISFKVTNEMQCRENSIDPTKPLAERMKIENCSIIEGTGNFDKCVSQVESILVAPKLPLPANIEAASSGFESVDQVFRFASSTAPMFITGREMLASIDTLKDHRLLRSDFSGDVEELAEAAREFCSSEVIIRTDGPVIQLPNARGEQKLNSLNFDLCKTMALTVSLLRHMAAGENQPSFIKWEKSIAGPDGKPLADLGWQVGVILHHVLFTEEWGRNAYEAGYSHNL	0	101.796	54	15	83	4	370	40.5	5.22	227.78	15	1.063	0.987	1.003	1.045	1.111	1.032	1.048	1.043	1.059	0.959	0.09	-0.02	0	0.06	0.15	0.05	0.07	0.06	0.08	-0.06	0.432904	0.281853	0.969408	0.728172	0.271869	0.789089	0.471524	0.0481399	0.206358	0.634191	0.889498	0.902448	0.99018
FALSE	High	Master Protein	TGGT1_314780-t26_1-p1	transcript=TGGT1_314780-t26_1 | gene=TGGT1_314780 | organism=Toxoplasma_gondii_GT1 | gene_product=Myosin G [Source:UniProtKB/TrEMBL;Acc:A0A125YZG6] | transcript_product=myosin G | location=TGGT1_chrXI:4226752-4246422(-) | protein_length=2059 | sequence_SO=chromosome | SO=protein_coding_gene | is_pseudo=false	MTDRCWIPHPTEVWGIAVPAGAPGTCTYKLVEVTDDGTDPRKLEVTLAKSALTQVAPVTDPRSLEGVQNVCVLGDVSEASVLHTVRLRYQRDEIYTNVGHIVLALNPFKYLQLYGPDFVRTYFEDTHVFDLPPHLFQVSAAAVKGLSERGKPQSTLITGESGAGKTESTKLILQFLADVSELSSSSSSSFKVSSGARLVERAERNRSISQKDRGSCGTGGDNALQSGVGSGSQGREATSLQQRILEISPVLESFGNASTSRNPNSSRFGKWIEVYFGDKLKVLGASITSYLLELPRVTRHIAGERNYHVFYQLVHGLNTSDLVGVAETYRLGTDSLAFSYLTPQEQTVNTKSTKADTEVSSPAPDIDDLTGFSELKRALLVLGFSPSTQNSIFSIVAAI…	0	101.717	17	32	46	32	2059	227.2	6.37	101.86	32	0.952	0.965	0.974	1.01	0.962	0.975	0.984	0.987	0.975	0.957	-0.07	-0.05	-0.04	0.01	-0.06	-0.04	-0.02	-0.02	-0.04	-0.06	0.590173	0.680576	0.868815	0.929404	0.376097	0.5293	0.720979	0.751851	0.681841	0.532844	0.889498	0.902448	0.953822
FALSE	High	Master Protein	TGGT1_321640-t26_1-p1	transcript=TGGT1_321640-t26_1 | gene=TGGT1_321640 | organism=Toxoplasma_gondii_GT1 | gene_product=Cell division protein CDC48AP [Source:UniProtKB/TrEMBL;Acc:S7UJ74] | transcript_product=cell division protein CDC48AP | location=TGGT1_chrIb:1672063-1681153(-) | protein_length=1044 | sequence_SO=chromosome | SO=protein_coding_gene | is_pseudo=false	MGTAWCPLEGAGWDSSASSFRRGLGLRRLLSLSVFLLLPFPFIFLSPAHAVVRLPPSPAPPVSPSFTSSRFSGRRLRSPSEMGAERPTSRVPPAAILSSFENREREQRAKSTLKAAAEAASSARTTGSSCPTSCSSLASSLSSPIFTDPPLTDVRSIAPHCPSTSSSPSSSLSSSLSSSPSSSPSSSLSSSPSSSLSSSLSSSPSSSPAASLSSSSLSSLVSSLRGGRSFFSSSPPSPTAPVAGNLFVVKGSHARDPSVVFLSPRDMAALQVQRGDVVLLSGRRKRETVAIAMPDRSLEARHVVLHAHALKNIKLHAQDAIKVTPQRLLPHARRVFVLPFSDTLGDVRDGGAGRSEGRDRDAPGEKPSVEAVATKFFRHTSRPVKLGDQFVLEFPVHAK…	0	101.478	24	24	50	24	1044	112.8	7.5	127.08	24	1.036	1.02	1.062	0.961	0.995	0.98	1.02	1.002	0.994	0.997	0.05	0.03	0.09	-0.06	-0.01	-0.03	0.03	0	-0.01	0	0.536293	0.804986	0.586563	0.669092	0.899367	0.228448	0.265379	0.976927	0.843163	0.952047	0.889498	0.923824	0.922119
FALSE	High	Master Protein	TGGT1_207640-t26_1-p1	transcript=TGGT1_207640-t26_1 | gene=TGGT1_207640 | organism=Toxoplasma_gondii_GT1 | gene_product=Isoleucyl-tRNA synthetase family protein [Source:UniProtKB/TrEMBL;Acc:S7UJP0] | transcript_product=isoleucyl-tRNA synthetase family protein | location=TGGT1_chrIb:186451-201730(-) | protein_length=1242 | sequence_SO=chromosome | SO=protein_coding_gene | is_pseudo=false	MVLLLPRTSFRNPATAAICLIPEFRFRSSQAHQLKFFRIPGDQRTSLPSSQGLVSSSQWVLPRYSALSSASLAVISASKSAAPRLLKYRPSARFSSRLSVVSRGLSFLRTPNGSASSPLPSSVNSGPTVENFRTKSDATMASPCATTFEPLPERPDFPKEEERILAEWKDRNTFKRSVELSKGKPIFTFYDGPPFATGLPHYGHILAGTIKDVVTRYAHQTGHYVDRRFGWDCHGLPVEFEIDKSLGITSRHEIVEMGIDKYNDKCRSIVMRYASEWRSVIERMGRWIDFDNDYKTLDTRFMESVWWVFKQLFDKGLVYRANKIMPFSTACSTPLSNFEANQNYKDVKDPSIVIAFSCVEENGGVPLEFLAWTTTPWTLPSNLALCVNPELTYIQIRNK…	0	101.109	21	28	71	28	1242	141.3	7.5	187.08	28	1.034	1.037	1.048	0.952	0.985	0.988	0.998	0.992	0.995	0.991	0.05	0.05	0.07	-0.07	-0.02	-0.02	0	-0.01	-0.01	-0.01	0.515335	0.490815	0.473651	0.458916	0.291124	0.344701	0.207256	0.524443	0.782913	0.359802	0.889498	0.902448	0.922119
FALSE	High	Master Protein	TGGT1_205130-t26_1-p1	transcript=TGGT1_205130-t26_1 | gene=TGGT1_205130 | organism=Toxoplasma_gondii_GT1 | gene_product=VOC domain-containing protein [Source:UniProtKB/TrEMBL;Acc:S7UUX9] | transcript_product=hypothetical protein | location=TGGT1_chrVIIa:1506588-1532655(+) | protein_length=4815 | sequence_SO=chromosome | SO=protein_coding_gene | is_pseudo=false	MESCEPGDLGEPPGLSDDSREESTTSQLTSGSTSHDRQTRVADFSQQEQPASPSPSDRSQRGDTRNPFSSAMETEPTSSCDIHAHADQDDPRDATVPGPQVHQSGSNAGAMSIHSQPVSPFTDAQERRLQLHARYQRHQARVVAASRAVEGELLTLCGESKKKAPHLKEATERALLHIQDFRDKAEASIETLSRAACSATSFSEEAAAAEAAEAVFRSFPVKEVLLAASHAVRTHSSKISMLALSLLQRLLTSHQRQLLLLPCAPEDSLLLPQPTARREDSEQDPDDGSASAHAEPPCADAADSRDSSLCFSFEGDLPSEVQQHRDRTEAELAATAASDVLLLLAVLEELLMLHQGDDENFVQLKVLQTALLLLAPDSAVAADASVAHRLLQLFFSLYR…	0	101.107	7	30	44	30	4815	517.3	6.33	89.87	30	0.887	0.899	0.902	1.138	1.009	1.023	1.027	1.017	1.025	1.029	-0.17	-0.15	-0.15	0.19	0.01	0.03	0.04	0.02	0.04	0.04	0.513385	0.558961	0.568412	0.495019	0.11072	0.0467587	0.0177917	0.32471	0.212504	0.46156	0.889498	0.902448	0.922119
FALSE	High	Master Protein	TGGT1_258390-t26_1-p1	transcript=TGGT1_258390-t26_1 | gene=TGGT1_258390 | organism=Toxoplasma_gondii_GT1 | gene_product=J domain-containing protein [Source:UniProtKB/TrEMBL;Acc:S7W7H7] | transcript_product=putative DnaJ protein | location=TGGT1_chrVIIb:3406355-3407941(-) | protein_length=397 | sequence_SO=chromosome | SO=protein_coding_gene | is_pseudo=false	MGLLHLLKGLFPLCIAFGMLLETWRVPETANWSLFSLDMYPLMVLAAKQNLYSVLGVKRNASADEIKKAYRKLSMKYHPDKNKEPNAEAKFKEISFAYEILNNAEKRQVYDEYGEEGLERLQSGGQQASHPFGDIFSDFFGGGFGGRTRETPKAPPSTVRLNVSLEQLYKGETLDISFTRPVMCMHADECFTKKPDCKGPGLRVITQQMGPGFIVQNQIQDDTCVDQGKAWRPRCKECPNGITEPEVTQLSATVEAGMRDGDEIVFDGVGEHKLGHEPGDLVLVIQELPHKRYSRIGDDLEMSIRISLLEALVGFERSFIHLDNTPVRVKKDDVTFDGQTMTLYNKGMPKKGNTSQFGNLRIKFMVSYPAALDEKQKAAARQALEGTRYSQREVTAF	0	101.089	53	17	44	17	397	44.6	6.93	131.49	17	0.968	0.98	0.987	1.03	0.997	1.01	1.017	1.014	1.002	0.995	-0.05	-0.03	-0.02	0.04	0	0.01	0.02	0.02	0	-0.01	0.216013	0.151869	0.383705	0.587785	0.936932	0.865003	0.788269	0.139778	0.972642	0.918609	0.889498	0.902448	0.922119
FALSE	High	Master Protein	TGGT1_263070-t26_1-p1	transcript=TGGT1_263070-t26_1 | gene=TGGT1_263070 | organism=Toxoplasma_gondii_GT1 | gene_product=Protein kinase domain-containing protein [Source:UniProtKB/TrEMBL;Acc:S7WDT1] | transcript_product=CMGC kinase, CK2 family | location=TGGT1_chrVIIb:801033-806072(+) | protein_length=539 | sequence_SO=chromosome | SO=protein_coding_gene | is_pseudo=false	MSLPFPVRSTKIGSFRLAVFYRGCSVRPVSGLRRPAIVPCSWRQVPISISGFPSPTAHTSSPQLHSLTPPQRCFDTVPSLALQGQRIRASLRMAPPRPTADAGAPPATVAPAARGLSGGPSYAASQEPESSQNVARYYADVNLHKPREYWDYENFVIRWGVPDGYEVVRKLGRGKYSEVFEGLRVGPPSATALALAGASPSGSGNSASVTSLPSLNSVGSSNSFVSTSSCSQPVRAASASSAGTTAGEAARLGFEGEKCVVKILKPVKKKKIRREVKILQNLCGGPNIIRLLDVVKDPASRTPALVFEHINNQDFKTLYPTLTDYDIRYYIFQILKALDYCHSQGIMHRDVKPHNVMIDHSKRELRLIDWGLAEFYHPGREYNVRVASRYYKGPELLVD…	0	101.03	43	19	53	19	539	59.8	9.07	157.58	19	1.003	1.015	0.998	1.012	1.015	1.027	1.011	1.047	1.019	1.014	0	0.02	0	0.02	0.02	0.04	0.02	0.07	0.03	0.02	0.0224277	0.665355	0.96643	0.664764	0.596498	0.113702	0.495349	0.116942	0.366254	0.0295812	0.889498	0.902448	0.988336
FALSE	High	Master Protein	TGGT1_286750-t26_1-p1	transcript=TGGT1_286750-t26_1 | gene=TGGT1_286750 | organism=Toxoplasma_gondii_GT1 | gene_product=MA3 domain-containing protein [Source:UniProtKB/TrEMBL;Acc:A0A125YUI3] | transcript_product=MA3 domain-containing protein | location=TGGT1_chrV:1543494-1550842(+) | protein_length=515 | sequence_SO=chromosome | SO=protein_coding_gene | is_pseudo=false	MASNKALGKKMSLLEEELRGPVKVMDTYDPIFDSESEDEDCLYTVIDVAADEYRQALNKTSCFSGATPPPQKSHLTLDEFTKLAKEILNSYFVNRETFDLSKALEELNCNQYLDSFLVLAIQSSLHRSTDEQRCISASLTLLVDKHIVSKQQMVRAFEKLIQSASDINVDSQLNPDRVYLFLDCAVLDGCVDESYVRRLPEKFLAALSRETLEGNRHLVDALRNLKSFKEAVRNFLPDFFNSGSVEEMKIFLDEQRQPLLQHEFVKMVVESAFSKENEHREMVSNALDRLYGKVLKPDDIQLAFARLVGDVDDYSLDNPDVYYLLAKFLARAVADEILPPSFLLDRYRLNYGGDAGVQVLKKVQKWLAEQNGKGISVRLRKVWTGTDPDNAEACEFKAR…	0	100.824	46	23	59	23	515	58.9	5.03	121.68	23	0.971	0.958	0.977	1.018	0.988	0.975	0.995	0.985	0.978	1.044	-0.04	-0.06	-0.03	0.03	-0.02	-0.04	-0.01	-0.02	-0.03	0.06	0.452601	0.176588	0.469576	0.468355	0.42797	0.540837	0.473798	0.0287451	0.288343	0.187905	0.889498	0.902448	0.922119
FALSE	High	Master Protein	TGGT1_235160-t26_1-p1	transcript=TGGT1_235160-t26_1 | gene=TGGT1_235160 | organism=Toxoplasma_gondii_GT1 | gene_product=hypothetical protein | transcript_product=hypothetical protein | location=TGGT1_chrX:4553113-4566152(-) | protein_length=1545 | sequence_SO=chromosome | SO=protein_coding_gene | is_pseudo=false	MSQDSSLNSMAGGAMFTGAVSAFPSHASSPRPVQTVADFERIATAALSVDANERSQAEALLLQFQQHSVESLDFCLAVLEQSRDPATLSVAVIVLRNGAIAQWGRRQLAYEASVKANSGSGDTLRNDELRAPLLEFESKVVFLIQGMLRLLQAHAVLQDTNSVQATDYRVCDRQMTYALAVLLKKALASGTRETRDALLQMLLNLLEEMRTLLIPAGTVPASQRPHLQEGASILEAVETGKPSPHVSNFVLCLSVLMSVSREVGSSDLSLLQLTTQQHIDCKKQFEREILLPLVDLDLSLLNLLLKKCSSLDAQAFAPPEARKQRDSLLASVVGILELLMDWNFGQVLLRFVTTSDVSFAPTAEWLPVFFPSSASPSPGFRLESLVFPPGPEQERPNLF…	0	100.451	16	21	37	21	1545	168	6.28	116.75	21	0.884	0.88	0.874	1.113	0.984	0.979	0.973	0.999	1.007	0.969	-0.18	-0.18	-0.19	0.15	-0.02	-0.03	-0.04	0	0.01	-0.04	0.599012	0.603764	0.514187	0.654667	0.291783	0.0227515	0.597577	0.207871	0.609983	0.674023	0.889498	0.902448	0.922119
FALSE	High	Master Protein	TGGT1_236570-t26_1-p1	transcript=TGGT1_236570-t26_1 | gene=TGGT1_236570 | organism=Toxoplasma_gondii_GT1 | gene_product=Lysine decarboxylase family protein [Source:UniProtKB/TrEMBL;Acc:S7W5X6] | transcript_product=lysine decarboxylase family protein | location=TGGT1_chrX:5322842-5325476(+) | protein_length=397 | sequence_SO=chromosome | SO=protein_coding_gene | is_pseudo=false	MKAKMSHEALTETARKRRKEDTMANGKEGSNSGNSPSSVPAEAISDKGIVRQAIKSYNNQDWLHSRSAREVRILCEYLEVEDRLRMQKVLGTFLLFGSARSRSPEQWQKLMSEAQERLKDPSTAAQAEEDVQRLKKIEWMCPYWQKIKNLSGMLMQWIQTEEARQAVARLLREIPAPVGGSGHQYSAGDVAAVTDLSEPCPVAICTGGGPGMMEAGNSGAASVAGGRSMGMGISLPFEAGLNPFVDEGLAFEFHYFFTRKFWMVYSALGVIVAPGGVGTLDELMEVLTLKQSGKMKRDIPIVLFGKQFWKDIICFDKLVEYGVVSEKDRDQLFYTDDENEAFEYLKQFLLNDKLVLGDQYVHKSLRHAAPGSRGSTSQSASPAGVIQGRGADYTESI	0	100.073	48	18	49	18	397	43.9	6.57	154.76	18	1.163	1.165	1.163	0.864	1.005	1.006	1.005	0.989	0.989	1.003	0.22	0.22	0.22	-0.21	0.01	0.01	0.01	-0.02	-0.02	0	0.52006	0.486656	0.499285	0.507918	0.742422	0.342833	0.131522	0.0799465	0.261758	0.798583	0.889498	0.902448	0.922119
FALSE	High	Master Protein	TGGT1_312230-t26_1-p1	transcript=TGGT1_312230-t26_1 | gene=TGGT1_312230 | organism=Toxoplasma_gondii_GT1 | gene_product=DNA topoisomerase 2 [Source:UniProtKB/TrEMBL;Acc:S7W1T2] | transcript_product=putative DNA topoisomerase 2 | location=TGGT1_chrXI:2472947-2490813(-) | protein_length=1658 | sequence_SO=chromosome | SO=protein_coding_gene | is_pseudo=false	MSSSEDEEFQNSSPSLSPARSRPEKGKKSGGGKPKTIEQRYQKKSQLEHILLRPDTYIGSTEVHTQALWVMEEGQETMVYKTINYVPGLYKIVDEILVNAADVKAREGEEQKGKPLKPGARRMSAIKIDINKASGRISIWNDGEGIPVAIHQEHKVYVPEMIFGQLLTSDNYDDSECRVTGGRNGYGAKLTNIFSREFTVECADGERKKKFKMTWTKNMEQKSESEISSYNGTDYVKISFIPDFAKFGMTGFDDDSLSLLRKRAYDLAGTSGVKVFLNGTRIDINSFSQYVDLYLGGRKSEKPSKEKEEFDESDDDWDEGPKRKKAAKKNGKKGELEDEEDVANGVEKKVIKIHDKQWRWEVVISSTDGGQFQQVSFVNSICTTKGGTHVSHVIEPLLA…	0	100.02	20	29	44	29	1658	185.8	7.44	87.65	29	0.943	0.934	0.948	1.075	1.014	1.004	1.019	1.027	0.978	1.028	-0.09	-0.1	-0.08	0.1	0.02	0.01	0.03	0.04	-0.03	0.04	0.143504	0.298433	0.390104	0.322009	0.842001	0.582443	0.0807087	0.437166	0.509855	0.455664	0.889498	0.902448	0.922119
FALSE	High	Master Protein	TGGT1_319920-t26_1-p1	transcript=TGGT1_319920-t26_1 | gene=TGGT1_319920 | organism=Toxoplasma_gondii_GT1 | gene_product=Dihydrolipoamide acetyltransferase component of pyruvate dehydrogenase complex [Source:UniProtKB/TrEMBL;Acc:S7UK76] | transcript_product=2-oxo acid dehydrogenases acyltransferase (catalytic domain) domain-containing protein | location=TGGT1_chrIV:604302-610675(-) | protein_length=669 | sequence_SO=ch…	MLATRRVFSASPRLVCARAGIAQAFVPRPLAPLTRLGAGCLPQRQLELNNAPLVLPGKRCLLTVSRPALAVKTFKLADIGEGIAQVELLKWHKGVGDHVEEMDELCEVQSDKAAVEITSRFTGTIVKLHQKEGMMVRIGAPLMDIDVEAGEDHAEEEEPETKERPAPVSEPAAASPSVGAEASSTTFSASPATRRFAKEKGVDLARVKGSGRNGLITKEDVLKFLESSQVAAPAAQSPPPAPAQGLQNAVCSEARNSTQSGVQTEDRSSTMSCLTSPGSLGAAGVSADQATVSSDAGTSPDEPLVSSLSGCTQGGTCEEKTPVSFAGSGKQAKKQKGLLSGTSVTSDVSGASAAESKSNVASPGPGVRTPEVTSGAPAGATDASVFPFSHGADVSSIPG…	0	100.009	25	12	47	12	669	70.2	6.8	130.95	12	0.957	0.966	0.951	1.05	1.006	1.014	0.999	1.04	1.013	1.031	-0.06	-0.05	-0.07	0.07	0.01	0.02	0	0.06	0.02	0.04	0.425212	0.563804	0.556984	0.531401	0.824606	0.433725	0.882247	0.251738	0.344413	0.379574	0.889498	0.902448	0.922119
FALSE	High	Master Protein	TGGT1_320050-t26_1-p1	transcript=TGGT1_320050-t26_1 | gene=TGGT1_320050 | organism=Toxoplasma_gondii_GT1 | gene_product=Ribosomal_L18_c domain-containing protein [Source:UniProtKB/TrEMBL;Acc:A0A125YYH7] | transcript_product=ribosomal protein RPL5 | location=TGGT1_chrIV:494655-497683(+) | protein_length=310 | sequence_SO=chromosome | SO=protein_coding_gene | is_pseudo=false	MAFVKALKNKAYFKRYQVKYRRRRQGKTDYAARRALVLQDRNKYNAHKHRLVVRLTNKRIICQVVYSTIEGDRVLATAESTELPRYGVKIGLTNYAAAYCTGLLLARRVLKQLGMSETFEGVEATGEEYHIEENFGERRPFKVLLDVGIVRTTVGNRVFGAMKGAADGGLHVPHGIKKFPGYSKPEGEGEGSYDPEAHRARILGLHVADYMRQLKEEDPEKYSAQFSQYIKNKIEADDIEAMYKNAHAQIRKNPDAVKKERAANVQNVRQGNVIKTAKGQYVRHVKLTKAQRRERVQQKIAMIAEQMAEA	0	99.868	45	15	96	15	310	35.3	9.88	211.42	15	1.174	1.156	1.151	0.875	1.027	1.011	1.007	1.008	0.98	0.962	0.23	0.21	0.2	-0.19	0.04	0.02	0.01	0.01	-0.03	-0.06	0.565426	0.539674	0.520115	0.530623	0.689576	0.632138	0.205854	0.045578	0.115284	0.281482	0.889498	0.902448	0.922119
FALSE	High	Master Protein	TGGT1_234230-t26_1-p1	transcript=TGGT1_234230-t26_1 | gene=TGGT1_234230 | organism=Toxoplasma_gondii_GT1 | gene_product=hypothetical protein | transcript_product=hypothetical protein | location=TGGT1_chrX:4104920-4121364(-) | protein_length=4625 | sequence_SO=chromosome | SO=protein_coding_gene | is_pseudo=false	MPEPTQCTSSSLPHSASSDVSDLSASSPSPPSRVCSVVSDAWPRETFVSSSAPTATDAPSEASSSTLPSSLVSSFSSSIDFQSPSPRWGPSVPRMLTRRSGKTCTVSRASDPPSCCPPSVPMCLDEIRAPLPKAWRGRGKKSRARSRFSPDSLQEYPESWEGVDEGEETESEKEARASGREDAKNVGRSEGVPEGARCVDWERGSREDGHNSQREGCGVEVEKKEDEEDVSLSSRCRQPLRDYPCESEHRSGSGQRRNHLEREDCAEVSEDIGRDAYQGEPSRTEGEERETSYEGRTCCPHQDGETGHPSSDTPLSSSLSSPPSSFQAPRAVHELSMLEASSLLLSETPTLRTPHTSSSSSHLSRASSSGGSSASLSERREEGGSLHTAIAGSPTSSTC…	0	99.774	8	27	32	27	4625	490.3	5.66	74.07	27	0.976	0.99	0.999	1.03	1.006	1.019	1.029	1.004	1.022	0.971	-0.03	-0.02	0	0.04	0.01	0.03	0.04	0.01	0.03	-0.04	0.314543	0.055185	0.593397	0.374061	0.559725	0.493966	0.36185	0.927967	0.677778	0.202533	0.889498	0.902448	0.922119
FALSE	High	Master Protein	TGGT1_279100-t26_1-p1	transcript=TGGT1_279100-t26_1 | gene=TGGT1_279100 | organism=Toxoplasma_gondii_GT1 | gene_product=hypothetical protein | transcript_product=hypothetical protein | location=AAQM03000427:32-1883(+) | protein_length=435 | sequence_SO=contig | SO=protein_coding_gene | is_pseudo=false	MWRIWRCRLSFLFVTGCLLGALTAGLGSQMSDSVGRNVQAPAGVADASQEAGDVVEERTERTEEQVFAPGPPRRHSSESLFPRNASVTARRRRNRRIALIATAVGVAVILAALYVLRRRRAQPPQEPEPPTRLRTPRPRAPSEQQQPSESEPPAEVPMTPDPLTLRFTCLGDRNVIFFGPSGRQDGFTPLYDPSPSKRVATVDAGTYGLFIGGVGMNGEFADTIIEEARRNRIPLTATELSAESQEIQERLLHDAERQPGTLVEIDSGRFSRVFARSFAYVAIVPNTVWDESETGKNVGATFLHILKPEVTPHGNEMNDVMLYTVAPFGNASDSAYNMAYKATMLGIVGAVSEYNKTPWGEVKPVEAIRLPLLGAGHFRGHRSLDSIGRANAAAVEAAI…	0	99.629	49	16	49	4	435	48	7.5	154.11	16	0.828	0.855	0.82	1.257	1.041	1.074	1.03	1.078	1.101	1.006	-0.27	-0.23	-0.29	0.33	0.06	0.1	0.04	0.11	0.14	0.01	0.538084	0.582921	0.46186	0.319692	0.722016	0.528326	0.663364	0.174813	0.376427	0.0821536	0.889498	0.902448	0.922119
FALSE	High	Master Protein	TGGT1_231410-t26_1-p1	transcript=TGGT1_231410-t26_1 | gene=TGGT1_231410 | organism=Toxoplasma_gondii_GT1 | gene_product=hypothetical protein | transcript_product=hypothetical protein | location=TGGT1_chrVIII:1401693-1406022(+) | protein_length=571 | sequence_SO=chromosome | SO=protein_coding_gene | is_pseudo=false	MNFSSSARWLAVRQSQTLGHTTRATVAAGRRVLAHSPAATEFTSFQSSHIGGDVCKLPLAVALGAAPSALGYGSAKHNQQRQYATLGSGWSFSKVQYTKYRITKPWTTDTTFDDIILSQPSKEDFAKFTKEAPLFLRFLKLVTDVEGRQEAFIQFAKRCENGLTVEKDVYVTKKELVDCLWKNGYTDTEINAFEIAFPADYKFHYPELAVLFDLTEEDCYKYCIRQRAATPEELVELKYTKPKNLVSSYGLCFLGVWFGLSNTVLSNAWFYSKTFPFGAVFYMLGSYFYRDIREKLWKEEKSLIHTAQENKNMGEESVYKQMKKYATDTKCLDYLSTFRTEVEDQIANYKVALVSQMRRQLTERLVEKLNGIQQAEKLIQGSLQDVMIREIVSSFKDLY…	0	99.551	46	24	61	24	571	64.6	8.19	141.89	24	1.114	1.102	1.137	0.888	0.988	0.978	1.01	1	1.011	1.017	0.16	0.14	0.19	-0.17	-0.02	-0.03	0.01	0	0.02	0.02	0.465037	0.580364	0.393006	0.444043	0.187232	0.55346	0.467578	0.99599	0.182361	0.410295	0.889498	0.902448	0.922119
FALSE	High	Master Protein	TGGT1_310080-t26_1-p1	transcript=TGGT1_310080-t26_1 | gene=TGGT1_310080 | organism=Toxoplasma_gondii_GT1 | gene_product=AMP-binding domain-containing protein [Source:UniProtKB/TrEMBL;Acc:S7USA9] | transcript_product=AMP-binding enzyme domain-containing protein | location=TGGT1_chrXI:1008086-1011664(-) | protein_length=789 | sequence_SO=chromosome | SO=protein_coding_gene | is_pseudo=false	MALQYAYPVDSPRPGESAIWRCAKYEEAMAPEAPRAPERGSFLTSFDLEASDCSAQNAFPEGACPPISGWWHSAYGVFRVGKSRAGGGARCMGARPLPTDKEFFYWTFDEADEKARLLGSGLTELLREGVVSVETFADETRNGGKFANVGILLHSRREWILTDLAISAYPPLTSVTLHYTFPPDHMKAILLEAGVSTLVTDVEQLKVVNELKADLPLLRGLVVVNLAEETARLAAEKPEEKEKLLKLVEELRAKDVQVFDFQDILEKGRRAYIPPIMEQDPERIFTIVYTSGTTGNPKGVMMSNRNFVREIQGCLHINDYTLMLDDDFLHFALLPLSHVFERMVEYVAYGFGAAVAYFSRKKELLADDWRFARPSCLIMVPRVAALVLDSIETQMQQLP…	0	99.42	31	22	70	21	789	87.8	5.6	154.82	22	0.888	0.915	0.916	1.06	0.942	0.971	0.971	0.961	0.983	0.954	-0.17	-0.13	-0.13	0.08	-0.09	-0.04	-0.04	-0.06	-0.03	-0.07	0.279543	0.308132	0.384808	0.548201	0.129296	0.39917	0.152524	0.234493	0.150573	0.344485	0.889498	0.902448	0.922119
FALSE	High	Master Protein	TGGT1_219710-t26_1-p1	transcript=TGGT1_219710-t26_1 | gene=TGGT1_219710 | organism=Toxoplasma_gondii_GT1 | gene_product=hypothetical protein | transcript_product=hypothetical protein | location=TGGT1_chrXII:634817-646431(-) | protein_length=1893 | sequence_SO=chromosome | SO=protein_coding_gene | is_pseudo=false	MGNEVASHQGASVSPSHAVRGLERSEKGDQRQDGAGLDFHPFLLPRRTMPCSTRSSLCSAELPAAAAVLNGQYPFLLFASADHLIPLEAAVANSLSSSACASTASSSSKDNTRKKEQRKKGGERGEAGEHGGEGEENPLLSLLSFDGSGSFPRTEAALDVSTYNVALLREALRAGPQGRTGREKGDSLLAWPSPFPAFLPPGRAIDTNQLFVAYAVKGGVRVMPIVGSADGGVEETYKAPLYVPPTLSAGPPQAKPSAVSVALYQGTKPQFLLVSDSNNLVSIFKLAPPVSAGSRGSSGGASSFLLLQLPKPEEPLAQVSSAGAASQSVSSASQSMSPIYVAWVPPAAGGLQEEAAQPGREQSCGLGSTDVYFVTVQRHQVILWSLPVLRSYCISKNIK…	0	99.324	15	25	42	25	1893	199.7	6.55	92.89	25	0.978	0.925	0.974	1.028	1.005	0.951	1	0.987	0.972	0.972	-0.03	-0.11	-0.04	0.04	0.01	-0.07	0	-0.02	-0.04	-0.04	0.769828	0.398476	0.768607	0.713644	0.135257	4.43404e-05	0.980796	0.0252983	0.0606012	0.417672	0.901037	0.902448	0.928687
FALSE	High	Master Protein	TGGT1_277720-t26_1-p1	transcript=TGGT1_277720-t26_1 | gene=TGGT1_277720 | organism=Toxoplasma_gondii_GT1 | gene_product=GDA1/CD39 (Nucleoside phosphatase) family protein [Source:UniProtKB/TrEMBL;Acc:S7V0B7] | transcript_product=GDA1/CD39 (nucleoside phosphatase) family protein | location=TGGT1_chrXII:6466417-6468990(+) | protein_length=857 | sequence_SO=chromosome | SO=protein_coding_gene | is_pseudo=false	MAEREAEDRLSSRRSLPFRVFSFSLLLLLFSKATWEEAAAVVLSGNGGRARDLDSDALGGSMRPEKVHRFRRSYETGGDLVSALELSFLDRAARSEQGEERASAPASPVSTLRTPLSGPVAALPFSHRQTQSLGHSNSLTPASHPHAHPAVSSYPDSSFPSSPPTFLSPSSSSPPSSFSSSSTTGASVSPLSSSSFVEGSYAEENDAALLSSLMEQAPVRPPEPRDSGGGRRVLEELMLSEVSCRQLTQAMIVVDGGSSKTLPSLFTAVTESCPQEGRRVLEGTLKFVGEGTKVAGVRDLLEDWLDAHAGKDWESRELDAQTLMRSFPSMQEQANKLVARLIQDIVALLNSRLSETEKEEVKALGVPVFFHTTAGVRGFPDWYRDGMFVALRRAINASP…	0	99.213	29	23	48	23	857	92.4	6.34	130.69	23	1.094	1.073	1.069	0.931	1.018	0.999	0.995	1.002	1	1.016	0.13	0.1	0.1	-0.1	0.03	0	-0.01	0	0	0.02	0.473911	0.585101	0.582135	0.49444	0.377276	0.966159	0.795631	0.906716	0.989343	0.555919	0.889498	0.902448	0.922119
FALSE	High	Master Protein	TGGT1_206470-t26_1-p1	transcript=TGGT1_206470-t26_1 | gene=TGGT1_206470 | organism=Toxoplasma_gondii_GT1 | gene_product=Dihydrolipoyl dehydrogenase [Source:UniProtKB/TrEMBL;Acc:A0A125YH62] | transcript_product=pyruvate dehydrogenase complex subunit PDH-E3II | location=TGGT1_chrVIIa:922416-929013(+) | protein_length=519 | sequence_SO=chromosome | SO=protein_coding_gene | is_pseudo=false	MKAAVFRNLAVAWRPAGSSPLLSQKNQGLSFSLLPSAVQRRGFASAGGKYDVVVVGGGPGGYVAAIKAAQLGLKTACVEKRGTLGGTCLNVGCIPSKAVLNISNKYVDARDHFERLGIKIDGLSIDIDKMQKQKQKVVSTLTQGIEHLFRRNGVDYYVGEGKLTDSNSVEVTPNGKSEKQRLDAGHIILATGSEASPLPGNVVPIDEKVIISSTGALALDKVPKRMAVIGGGVIGLELGSVWRNLGAEVTVVEFLDRLLPPVDGEVAKAFQKEMEKTGIKFQLGTKVVGADVRESSATLHVEPAKGGNPFDMEADVVLVAVGRRPYTKNLGLEELGIETDRVGRVVVDDRFCVPNYPNIRAIGDLIRGPMLAHKAEEEGIACVEMIAGVGEGHVNYETI…	0	98.717	40	17	50	17	519	55.1	7.03	127.06	17	1.105	1.105	1.11	0.885	0.978	0.978	0.983	0.997	0.981	1.004	0.14	0.14	0.15	-0.18	-0.03	-0.03	-0.03	0	-0.03	0.01	0.493472	0.551974	0.473088	0.463847	0.294135	0.226005	0.402661	0.664221	0.416618	0.737196	0.889498	0.902448	0.922119
FALSE	High	Master Protein	TGGT1_287180-t26_1-p1	transcript=TGGT1_287180-t26_1 | gene=TGGT1_287180 | organism=Toxoplasma_gondii_GT1 | gene_product=hypothetical protein | transcript_product=hypothetical protein | location=TGGT1_chrV:1391105-1404550(+) | protein_length=2072 | sequence_SO=chromosome | SO=protein_coding_gene | is_pseudo=false	MDSARHFLEFFWALGNSQPETRVEAAVGIVEFLVERQKAGAIRSGLSLPASEATEPGCSQPDAREAEEKPESQKRKKKRGFKGRQGDLGQPIKNLISFQGSSACDDLQYAANRLLAGLTSPRACVRQGYSLALLLLLLHFKKEVPREKVLTALEQHTSIAKAFPADVKTLLLGRLFGYAVLQKTGYFTSNACLTQCNTTFSSLWEIVDKKVYLQEAAFRLMRRIVVDLSSFSPSIALQFVHARLGVMASVRVTTAPSLPEGEASQREAKPQLGKTITGRLPCSLAAFLLDLRWEASRLAWRKKENFKHLETLFSVDLLHEEERPRLMAFLADTAAFHPRLHSLWDSCLTLLLHSKIDLEPKDTFLRWCRNVDKTLFPPSTTSQVVKDQAPQREGEKARV…	0	98.69	15	26	41	26	2072	226.6	6.61	93.93	26	1.007	1.029	1.017	0.951	0.957	0.978	0.967	0.964	0.962	0.99	0.01	0.04	0.02	-0.07	-0.06	-0.03	-0.05	-0.05	-0.06	-0.01	0.911585	0.64734	0.779782	0.515488	0.0714771	0.205679	0.118888	0.357688	0.176338	0.32728	0.962239	0.902448	0.930759
FALSE	High	Master Protein	TGGT1_224060-t26_1-p1	transcript=TGGT1_224060-t26_1 | gene=TGGT1_224060 | organism=Toxoplasma_gondii_GT1 | gene_product=Putative thioredoxin [Source:UniProtKB/TrEMBL;Acc:A0A125YVC0] | transcript_product=putative thioredoxin | location=TGGT1_chrX:3262854-3264722(-) | protein_length=622 | sequence_SO=chromosome | SO=protein_coding_gene | is_pseudo=false	MAPRTSLALLALYALVSTSSHLLPDSFPPSFSSLSLSGVSAAPREAGVVNVEEASSSGAARSDKSTKSYSAQQRQQTRENQLKVLESGAMTLSGLGTYKEFIASHPFVLVMYYAPWCYWSKATLPEFHAAAKILAHHEPPVILALVDSVEEEEIANHEDIREFPTLKFFIDGRSQAYEGRRHRTHLVHWVDTRLDRDKSLTSKQHLDEVMSNRDHGHLVIVGAFSESGYDAKAYVSVARRFGEDVFFGHVQDPALVNHLREHIRRLLGGEKVAADIERRLVSPPFIAVFSKHAHEPDVHMYTGNPSDVSALTTFVSRFRFPLVSIFDADRLPENFFTDGRPKAVLIVDSKRNPAAVAAVESEVSTDPIVRAFLEGARKHRHSVLAAVCGVTSAFEKHML…	0	98.435	40	23	54	23	622	68.9	6.7	149.87	23	1.066	1.04	1.068	0.975	1.04	1.014	1.041	1.01	1.004	1.028	0.09	0.06	0.1	-0.04	0.06	0.02	0.06	0.01	0.01	0.04	0.653361	0.668778	0.447851	0.841093	0.108465	0.722793	0.522411	0.760183	0.806276	0.354076	0.889498	0.902448	0.922119
FALSE	High	Master Protein	TGGT1_216880-t26_1-p1	transcript=TGGT1_216880-t26_1 | gene=TGGT1_216880 | organism=Toxoplasma_gondii_GT1 | gene_product=WD_REPEATS_REGION domain-containing protein [Source:UniProtKB/TrEMBL;Acc:A0A125YYR8] | transcript_product=guanine nucleotide-binding protein | location=TGGT1_chrXI:5736268-5739860(-) | protein_length=321 | sequence_SO=chromosome | SO=protein_coding_gene | is_pseudo=false	MSGESPLEFKGVLEGHTDCVTAISTPSLKSNTIVSSSRDHKVIVWTLNDNPDDSGSVGYARRALTGHSQCVQDVVINSDGQFALSGSWDKTLRLWDLNAGVTVRSFQGHTSDVNSVAFSPDNRQIVSGSRDRTIKLWNTLAECKYTIVDDQHNDWVSCVRFSPSANKPLIVSCGWDKLVKVWNLSNCKLRTNLVGHTSVLYTVTISPDGSLCASGGKDGVAMLWDVNEGKHLYSLDSNSTINALCFSPCNYWLCAATDKSVKIWDLENKNVLSEITPEKTNRSGAPWCTSLNWSHDGRTLFVGTFTGAINVYEVSSEQVTA	0	98.211	65	15	83	14	321	35.1	6.34	241.25	15	0.951	0.996	0.992	1.024	0.974	1.02	1.016	0.995	1.021	1.001	-0.07	-0.01	-0.01	0.03	-0.04	0.03	0.02	-0.01	0.03	0	0.676103	0.96634	0.87846	0.665764	0.685089	0.694653	0.0304192	0.948026	0.572946	0.965011	0.889498	0.988047	0.957063
FALSE	High	Master Protein	TGGT1_291980-t26_1-p1	transcript=TGGT1_291980-t26_1 | gene=TGGT1_291980 | organism=Toxoplasma_gondii_GT1 | gene_product=HECT domain-containing protein [Source:UniProtKB/TrEMBL;Acc:S7W439] | transcript_product=HECT-domain (ubiquitin-transferase) domain-containing protein | location=TGGT1_chrIX:4247476-4268188(-) | protein_length=4151 | sequence_SO=chromosome | SO=protein_coding_gene | is_pseudo=false	MQRFIVMGRGSSRAASDDHRWTAMLQALQQPSPTQHTACLADLQEWLSYATEGSIGHFPLEAFVSALFDLLDGKPAASPFPRALAVSRRLSAASSVHSQSGAHAASPRGRPGRERSREAGAENEGATPGEASEKPRRRRGRAQRQSQDPGESATGEKPQATELSDTSASQASHAKEEGEKQNGGARERDEGRGDVEGGEGDRSEERGEKSGARGEKSGARGEKSEERGQKSEERGERGEARGDRSEEQREINEEQGETEEAGRSSVGSGESSSRVRGDGEETEEGEGERQQPQGTRTGSLAFELGSLAVRFGLDAGRPEGLLGGEDDFGFGGMGEEDELLLLQQQAALLGEDDADGQVQKMLLVANCLFLLLDLLPVQASAAIVRQPRYLRILNSKLTS…	0	98.176	8	29	34	29	4151	444.5	6.29	77.72	29	0.819	0.819	0.81	1.156	0.947	0.947	0.936	0.965	0.966	0.956	-0.29	-0.29	-0.3	0.21	-0.08	-0.08	-0.1	-0.05	-0.05	-0.06	0.381676	0.385448	0.372213	0.542909	0.321082	0.297079	0.240643	0.457532	0.34602	0.265235	0.889498	0.902448	0.922119
FALSE	High	Master Protein	P35908	Keratin, type II cytoskeletal 2 epidermal OS=Homo sapiens (Human) OX=9606 GN=KRT2 PE=1 SV=2	MSCQISCKSRGRGGGGGGFRGFSSGSAVVSGGSRRSTSSFSCLSRHGGGGGGFGGGGFGSRSLVGLGGTKSISISVAGGGGGFGAAGGFGGRGGGFGGGSSFGGGSGFSGGGFGGGGFGGGRFGGFGGPGGVGGLGGPGGFGPGGYPGGIHEVSVNQSLLQPLNVKVDPEIQNVKAQEREQIKTLNNKFASFIDKVRFLEQQNQVLQTKWELLQQMNVGTRPINLEPIFQGYIDSLKRYLDGLTAERTSQNSELNNMQDLVEDYKKKYEDEINKRTAAENDFVTLKKDVDNAYMIKVELQSKVDLLNQEIEFLKVLYDAEISQIHQSVTDTNVILSMDNSRNLDLDSIIAEVKAQYEEIAQRSKEEAEALYHSKYEELQVTVGRHGDSLKEIKIEISEL…	0	98.037	33	22	55	15	639	65.4	8	138.96	22	1.445	1.265	1.203	0.586	0.846	0.741	0.705	0.666	0.658	0.592	0.53	0.34	0.27	-0.77	-0.24	-0.43	-0.5	-0.59	-0.6	-0.76	0.150503	0.336885	0.378391	0.0295524	0.232676	0.316351	0.257863	0.130687	0.290832	0.293071	0.889498	0.902448	0.922119
FALSE	High	Master Protein	TGGT1_219800-t26_1-p1	transcript=TGGT1_219800-t26_1 | gene=TGGT1_219800 | organism=Toxoplasma_gondii_GT1 | gene_product=Vacuolar proton pump subunit B [Source:UniProtKB/TrEMBL;Acc:A0A125YPJ0] | transcript_product=putative vacuolar ATP synthase subunit b | location=TGGT1_chrXII:574692-577426(+) | protein_length=505 | sequence_SO=chromosome | SO=protein_coding_gene | is_pseudo=false	MAAQAAKADAALAHAAAASRDYRVAPRLDYRTVAGVEGPLVILDDVKFPMYNEIVNIHLGDGSVREGQVLEVRGKRAVVQVFEGTSGIDTRQCHAEFTGDVLKMPISEEMLGRAFNGSGKPIDRGPRVLAEEFLDINGCPINPQCRVYPKEMIQTGISAIDVMNSVVRGQKIPLFSAAGLPHNEIGAQICRQASLVAGKDVKDHSNENFAVVFGAMGVNMETARFFRQDFEENGSMERVALFLNLANDPTIERIITPRLALTTAEYLAYEREMHVFVILTDMTAYADALREVSAAREEVPGRRGYPGYMYTDLSTIYERAGRVEGRNGSITQFPILTMPNDDITHPVPDLTGYITEGQVFVDRGLHNRQIYPPINVLPSLSRLMKSGIGRGMTREDHPQ…	0	97.894	46	17	50	16	505	56.6	5.4	161.06	17	0.905	0.904	0.891	1.088	0.985	0.984	0.97	0.974	0.971	0.92	-0.14	-0.15	-0.17	0.12	-0.02	-0.02	-0.04	-0.04	-0.04	-0.12	0.4945	0.487524	0.437965	0.534814	0.159728	0.0936716	0.0103699	0.4326	0.119182	0.433798	0.889498	0.902448	0.922119
FALSE	High	Master Protein	TGGT1_243730-t26_1-p1	transcript=TGGT1_243730-t26_1 | gene=TGGT1_243730 | organism=Toxoplasma_gondii_GT1 | gene_product=Rhoptry protein ROP9 [Source:UniProtKB/TrEMBL;Acc:S7UG40] | transcript_product=rhoptry protein ROP9 | location=TGGT1_chrVI:2733555-2736099(+) | protein_length=353 | sequence_SO=chromosome | SO=protein_coding_gene | is_pseudo=false	MTHPNPLQTRFSRSASLVSRMPLVRLFFTIAAPLLFSPSPFPFLPLKTHCLAIQLGKPQGSPPASQKEAIRDTGVSHQKGEPSDSSSEPKPQGTVAETPGAASAAAAEVGRPSRSSAGPGKKKRGPSLFTEETMGPSKRHPCLKTLAAAVERFQAQHLTGRDAAKAFVDAIQECGIQVVASDYDRTAISVHSGGSARRDDLSVLGALTPDFKLLGEELTRRNIPIYFVTFSDKGENRGDRIAAGPLVEATLKASNANFEAQGVFGYYPPFYSEPEDYAPLGLSAPMPTDKSFHIQQVSKASGVSEDKILLLDDDRANCVNFCRSGGAAIHVSGHEGFDFGAVRVVVKPSLIMQ	0	97.782	56	18	70	18	353	37.7	8.31	172.33	18	1.145	1.173	1.156	0.862	0.987	1.011	0.997	1.001	0.994	0.976	0.19	0.23	0.21	-0.21	-0.02	0.02	0	0	-0.01	-0.03	0.543509	0.498587	0.544862	0.518154	0.103337	0.106177	0.798922	0.890767	0.69793	0.651118	0.889498	0.902448	0.922119
FALSE	High	Master Protein	TGGT1_290160-t26_1-p1	transcript=TGGT1_290160-t26_1 | gene=TGGT1_290160 | organism=Toxoplasma_gondii_GT1 | gene_product=Sortilin [Source:UniProtKB/TrEMBL;Acc:S7UPZ2] | transcript_product=putative sortilin | location=TGGT1_chrIX:3410442-3420211(-) | protein_length=1033 | sequence_SO=chromosome | SO=protein_coding_gene | is_pseudo=false	MYTSRTPHGGLRRWPLSRSSVSAVASRVLSRSVAFHRRLASFLLSRKKTPLCALSSRPSGLQASSGVQTVTMAHSFARGRPPAAGRTLAVFLAFLAVLSPSLLPEFFSEDAQKRESSVLVANAASYANKKVSVSEVSFDSHIEDIQWCGTDHRTILLKTRRGRLYRSQDGGKSWTEITDLLKSSEAATGTVAVDSIIVSPVDKRVVLIVGSKRNHFISEDSAATFRRLKYKNTIHNFHFHPTRPKYAILSTWTDACYSGSGTASRAQSQQDCNHQLFYTRDLGRSFKLVADYVVQFSWGDKKLGNTDHIFFTQHRGRSGDQPRYGGWSKNVDLMYTPDFGATITRLVYRGNKFLLSNGYFFVAKVKDAAKQTVSLLVSTDGGKSFQMAKLPVEIEERSY…	0	97.679	28	24	56	24	1033	113.5	6.67	137.26	24	0.998	1.044	1.021	1.004	1.002	1.049	1.026	0.998	1.019	0.991	0	0.06	0.03	0.01	0	0.07	0.04	0	0.03	-0.01	0.762908	0.0598714	0.371661	0.806834	0.926153	0.229291	0.528547	0.827997	0.409128	0.899547	0.89926	0.902448	0.922119
FALSE	High	Master Protein	TGGT1_206610-t26_1-p1	transcript=TGGT1_206610-t26_1 | gene=TGGT1_206610 | organism=Toxoplasma_gondii_GT1 | gene_product=Dihydrolipoamide acetyltransferase component of pyruvate dehydrogenase complex [Source:UniProtKB/TrEMBL;Acc:S7UTU2] | transcript_product=pyruvate dehydrogenase complex subunit PDH-E2 | location=TGGT1_chrVIIa:755999-763930(-) | protein_length=929 | sequence_SO=chromosome | SO=protein_coding_gene | is_…	MALPSPGILVHVSLFLAAVSSAFGLQLVPSSSPAPSASSTSFSGSSAPAFVAPAVSSGSGVHSTRPRFFASPSASSASSVSSTNAGQRPLSAGSSLQTRERRCGSRLTSSLLCAAEGTVRRQETAVGSSLRGAVQEISMPALSSTMKEGKVVTWSKQVGDRVEPGDVLMVVESDKADMDVEAFDSGFMAMHLVREGDAAPVGTTVALLAEKEEDISLIQAKGLSLISASSSPAADSTPAVTDLLMPSLSPSLKTARMTVWRKKEGEKVNKGDVLFVVESDKADMDVEAPHDGVLAHIAVREGVTVDVGSTVGYLAPSAEVASAFKNALSDSAAPAAANPSTMPEGAQEIFMPALSSTMTSGKVSKWNKAVGDAVHVGDTLMVVESDKADMDVESFDEGY…	0	97.592	27	19	53	19	929	96.8	6.38	124.63	19	1.038	0.999	1.047	0.965	1.002	0.964	1.01	0.981	0.983	0.996	0.05	0	0.07	-0.05	0	-0.05	0.01	-0.03	-0.03	-0.01	0.0875882	0.925004	0.252723	0.537505	0.976963	0.496616	0.708452	0.42288	0.45644	0.804989	0.889498	0.967633	0.922119
FALSE	High	Master Protein	TGGT1_291930-t26_1-p1	transcript=TGGT1_291930-t26_1 | gene=TGGT1_291930 | organism=Toxoplasma_gondii_GT1 | gene_product=RNA recognition motif-containing protein [Source:UniProtKB/TrEMBL;Acc:S7W432] | transcript_product=RNA recognition motif-containing protein | location=TGGT1_chrIX:4212023-4217780(+) | protein_length=705 | sequence_SO=chromosome | SO=protein_coding_gene | is_pseudo=false	MKRKAAPVAVARPASDSDDSDSSEEEQQMKVQKGKKGAAGAPASAKGAPKKPVPSKADSSSSSEDDSSDEEVAKRVAKKGGVVTSASAVQSAKQAVAASKKGAKAKPAADSSDSSGDSTEDETPQSKPVAKGKAQTANAALRKQESSSDDSSDEESPNGVRQAAPKAAAKAAVRKAASSSDESSDEDEAPQPPQPKGKKAAQPSKAAAPKAASKKAAETSSEEDSSDDEPAKKVTPPASKKPAAKAASSDDDSSSDEEMPAPQARPQKPAAGKAAAQKKADSSESEEDSDSDDEPSAKSKVSAAARLPAKKPVAKKEESDSSDEDDSSDDEKPAPAAQKKAVAAAQPKKKAAKAPAASSDESDEDDSDEEEEAPKKSKNEKDVMMEEESDEDSDDEEKS…	0	97.524	28	19	60	19	705	73.1	5.43	173.17	19	1.085	1.058	1.078	0.934	1.014	0.988	1.007	1.01	1.01	0.991	0.12	0.08	0.11	-0.1	0.02	-0.02	0.01	0.01	0.01	-0.01	0.589824	0.659311	0.577339	0.533459	0.751834	0.626663	0.791334	0.785811	0.382318	0.865559	0.889498	0.902448	0.922119
FALSE	High	Master Protein	TGGT1_232130-t26_1-p1	transcript=TGGT1_232130-t26_1 | gene=TGGT1_232130 | organism=Toxoplasma_gondii_GT1 | gene_product=hypothetical protein | transcript_product=hypothetical protein | location=TGGT1_chrVIII:1876792-1879382(+) | protein_length=456 | sequence_SO=chromosome | SO=protein_coding_gene | is_pseudo=false	MDPRGQPVGPARPGVPPQMMRPQGGPPPGAFPGGPRGPAGAPFGAPMGPGGPMGPPRGPGAQMGPPRGPGPQMGPPRGPGPQMGPPRGQQGPPPPGVRGLMPGMTPQGPPGARPGMPPPGAMPMGPDGKLRMQPQTAPGAPPAGMPGTGMPPQQVPRGPMGHVGGGTGGMPAPDARQPVPSKTDSHGLQQKDLAQRSRNLRTLEDDERSDHQFGEEILNKGLQTFARLVALNDVGDLGAWNGYTWKSRRPPSVFFINITHDPEGRLWAVTENNEVGKLTVKGFKAIGHIGQEDVVDITFDPKDGTLWAINRVGELLHWNGYTWDKKYHAGFHKLRAATFDRKGNLWVVNTAGEIAMWDEEEQQWDLKKVPGATRLHTLAFDENNKLWVLGSHGELMLLA…	0	97.501	50	17	56	17	456	48.8	9.91	175.31	17	0.917	0.932	0.931	1.076	0.987	1.003	1.002	1.014	1.035	0.994	-0.12	-0.1	-0.1	0.11	-0.02	0	0	0.02	0.05	-0.01	0.380386	0.496341	0.481747	0.449416	0.193943	0.721656	0.803477	0.490678	0.114539	0.704555	0.889498	0.902448	0.922119
FALSE	High	Master Protein	TGGT1_295040-t26_1-p1	transcript=TGGT1_295040-t26_1 | gene=TGGT1_295040 | organism=Toxoplasma_gondii_GT1 | gene_product=HEAT repeat-containing protein [Source:UniProtKB/TrEMBL;Acc:A0A125YVL7] | transcript_product=HEAT repeat-containing protein | location=TGGT1_chrIa:1332125-1343550(-) | protein_length=971 | sequence_SO=chromosome | SO=protein_coding_gene | is_pseudo=false	MATAGQTDEGDRASLQLMQQLLVSTLDPRQQVREQAEQQLVGARDGDFSLFLISLARVLDAQLSADPLQVQEQLLAKQIAAVTFKNCISAKDVVLDSAAADKWRAVAEAAKQAMRLQLLAAIKTEHIQVANAVCQVLSKIGRIELPGDGFPELLPFLLTLVTEATMTPEANAQADGVSVHRKVFGRNALTCLSYLCEEHADIVEETGEDPADVLSEAHCNNILTAVVQGMKDEDVQLKVAALKALYHALIFSKKNFENQTEREYIIQVVLENTKVAHQAVQVSAFECLVKVAEEYYSMLEPYMSGVGPLSWEALKSGDASVCIAAMELWNTIADVEIDIQQQEEEAAALGADGAESAVPRNCHIVKQALPFLLPILLNTLTQQDSEETDAADSWTAAMA…	0	97.491	28	24	52	24	971	104.5	4.75	128.01	24	1.126	1.145	1.15	0.914	1.029	1.046	1.051	1.021	1.036	1.036	0.17	0.19	0.2	-0.13	0.04	0.06	0.07	0.03	0.05	0.05	0.460499	0.407265	0.480107	0.578311	0.228052	0.206002	0.194196	0.285213	0.168143	0.0782673	0.889498	0.902448	0.922119
FALSE	High	Master Protein	TGGT1_283850-t26_1-p1	transcript=TGGT1_283850-t26_1 | gene=TGGT1_283850 | organism=Toxoplasma_gondii_GT1 | gene_product=Peptidylprolyl isomerase [Source:UniProtKB/TrEMBL;Acc:S7UMS7] | transcript_product=peptidyl-prolyl cis-trans isomerase | location=TGGT1_chrV:2748825-2756049(-) | protein_length=503 | sequence_SO=chromosome | SO=protein_coding_gene | is_pseudo=false	MGGTCEEASSHAHSHSCCGGGSDKVDVDPASIVDAGEEISSGDKGVFKKILKEGDGPQPQPGEEVVVHYTGTLLDGTKFDSSRDRDSPFKFIIGEGQVIRGWDLGVMKMKRGERAMLTIQPDYGYGASGSPPVIPPNSVLKFDVELLDSHPKPKDKWEMNVGEKLEGANAEKERGNEAFKKGGYAEAAAAYREGLDFFSFSENWTDEEREQQKRLELPLRLNLATCCNRLGEFSEAIEQTTKALEMDPESSKGWYRRGVARMAVGQLDEARHDFVQAAKLDPKNVEIRRELEKCKKKIEEVRAKEKSAFGNIFKKVDLYTEKQGVRNVSKCPKVYMDIKVGDNAPKRVVFALYNDTVPKTAENFRALCTGEKGEGKKGKPLCFKNSLFHRVIPGFMMQG…	0	97.459	42	20	66	19	503	55.5	5.59	172.55	20	1.141	1.126	1.128	0.882	1.007	0.993	0.995	1.006	0.976	0.984	0.19	0.17	0.17	-0.18	0.01	-0.01	-0.01	0.01	-0.03	-0.02	0.563687	0.607673	0.556962	0.566163	0.513812	0.684967	0.715239	0.00475724	0.0709424	0.355175	0.889498	0.902448	0.922119
FALSE	High	Master Protein	TGGT1_288210-t26_1-p1	transcript=TGGT1_288210-t26_1 | gene=TGGT1_288210 | organism=Toxoplasma_gondii_GT1 | gene_product=PUL domain-containing protein [Source:UniProtKB/TrEMBL;Acc:S7UQ70] | transcript_product=PUL domain-containing protein | location=TGGT1_chrIX:2194601-2205036(+) | protein_length=818 | sequence_SO=chromosome | SO=protein_coding_gene | is_pseudo=false	MASSPFLLAFEGAVHSKAVRCVCVVSKNALSSSSSSASASSLKPSFELVSGSLDSSVVVWSLEETPASRAPTGLVFSPRLCLQHHRDFVYCVAPCTADANIRSFFSGGKDKRALRIALDDGRVLMEYTGHEGPVCSLAEVAASSCLVTGSWDGSARLWNIASGECLRKLTQHKHAVSVLTLREPQLLVTGSQDKALNFWSISGHLEKTIPDAHDDIIRALDYLSLPSSSSASSSSSSPSSAVLSASNDQLVKAWSLDGSLLAQFEGHSAFVFDVTASRLRANVFFTASDDCTCKVWEVQDEESRRLSGRATQTLLHAATVWRVAELPTGDIVTCCEDGKLRVWTQDEARALPVAARMQQESEAKEAQAAAAAKSASSIDIASLPDVSQMASIRGQDGEM…	0	97.185	29	23	47	23	818	88.8	6.39	120.6	23	0.954	0.952	0.946	1.06	1.012	1.009	1.003	0.994	0.995	0.995	-0.07	-0.07	-0.08	0.08	0.02	0.01	0	-0.01	-0.01	-0.01	0.590843	0.650744	0.412181	0.496785	0.244769	0.74864	0.887814	0.752098	0.849862	0.654831	0.889498	0.902448	0.922119
FALSE	High	Master Protein	TGGT1_411430-t26_1-p1	transcript=TGGT1_411430-t26_1 | gene=TGGT1_411430 | organism=Toxoplasma_gondii_GT1 | gene_product=Protein kinase domain-containing protein [Source:UniProtKB/TrEMBL;Acc:S7UG16] | transcript_product=rhoptry protein ROP5 | location=AAQM03000489:189-1624(+) | protein_length=461 | sequence_SO=contig | SO=protein_coding_gene | is_pseudo=false	MSGGRVPRVPASSTTTSASEGIFRRLVRRLRRGRGTADGAGVADETHQEPRPPLRKRLAQHFRRLRGFFGRLTPRWLSGLGRRAQRWWRGRQRPLLDPSFHGLEAGDSFMRDLLKREKELIGYCREEALKEPAAMVEAVTATVWPQNAETTVDSLLSQGERKLKLVQPLRVGDRSVVFLVRDVERLEYFALKVFTMGAENSRSELERLHEATFAAARLLGESPEEARDRRRLLLPSDVVAVQSQPPFAQLSPGQSDYAVANYLLLMPAASGGEGILARHILTAQLIRLAANLQSKGLVHGRFTPDNLFLMPYGPVMLGDVSALWKVGTRGPASSVPVTYAPREFLNANTATFTHALNAWQLGLSIYRVWCLFLPFGLVTPGIKGSWKRPSLLVPGTDSL…	0	97.091	34	13	104	5	461	51.5	10.56	287.39	13	1.02	0.994	0.96	0.963	0.982	0.957	0.924	1.003	0.973	0.951	0.03	-0.01	-0.06	-0.05	-0.03	-0.06	-0.11	0	-0.04	-0.07	0.607736	0.844274	0.101663	0.396242	0.793365	0.0217815	0.257	0.945071	0.651571	0.366617	0.889498	0.940087	0.922119
FALSE	High	Master Protein	TGGT1_263520-t26_1-p1	transcript=TGGT1_263520-t26_1 | gene=TGGT1_263520 | organism=Toxoplasma_gondii_GT1 | gene_product=Microtubule associated protein SPM1 [Source:UniProtKB/TrEMBL;Acc:S7UXQ8] | transcript_product=microtubule associated protein SPM1 | location=TGGT1_chrVIIb:473105-475119(+) | protein_length=351 | sequence_SO=chromosome | SO=protein_coding_gene | is_pseudo=false	MSGGNSNTPKKLPSEEGSDYGYPQKPQKYLPKSEQAEPDYSACCKGNDAYKGASHGTVQFSHPEEAQKYAGAAAGAETIQRGRERVAADRQPPAAGDVPARRLHLSDVDEAHRGQSPSRHPGYCVEELCTCGMHKCIPSRAPVPFTGSTQYRQEFVPKPLPPPTQVSQVTLPPSLPFEAESSYRTEFVAKPLPPPAKFSEVKLPPTLPFHGESAYRTDYVPKPLPEVAKPVEVKLPPTLPFNAQSCYRSEYVAKPLPPPVQTVEVKLPPSLPFEGSTHYRDEFQVKPLPPATKVTEVKLPPSLPFDATSMYRSDYVAKSNPICPVSKLPQYPAATYPQNHVFWDPDTKQWY	0	97.031	59	15	46	15	351	38.7	7.9	124.4	15	1.097	1.076	1.05	0.952	1.044	1.024	0.999	1.037	0.986	1.021	0.13	0.11	0.07	-0.07	0.06	0.03	0	0.05	-0.02	0.03	0.395079	0.273701	0.528247	0.547366	0.130167	0.49102	0.905295	0.509934	0.253547	0.193089	0.889498	0.902448	0.922119
FALSE	High	Master Protein	TGGT1_220900-t26_1-p1	transcript=TGGT1_220900-t26_1 | gene=TGGT1_220900 | organism=Toxoplasma_gondii_GT1 | gene_product=hypothetical protein | transcript_product=hypothetical protein | location=TGGT1_chrII:27409-29529(+) | protein_length=706 | sequence_SO=chromosome | SO=protein_coding_gene | is_pseudo=false	MALNITAPPSPLASDTVTSPAAGKPREDSLPASPVAAVSRGSSFPASPSSAAGRTETAPKAEDSPKAGSRRPSFLSLKKKRTEQGNEADNAEEPRQSRRNSFANKAKALLGKATKGDSKSVNDDEVDSTSAAAEASEKAEELATSPKAESRTDKWRRRLSLSRDRSVERGLTANEEGTAGVKGLGSEPASPQNDTPESRLGRLKRRLSLSKDGDRSRRQSHVAEAENGKANEGEQSEKQDEAANSQETPADVSAVKEETENEPAPTMQVSEANSQTASPTNEKSESRRDKWRRRLSLSRDCSVERSEKGENMPKSPAADEESSTKRFLRRLSISSREEKRNSDSEREGEPKEGRLSRLRRRLSISKKEKESEEQAEEGASSEVEKEGRGRRLLRRLSVS…	0	96.803	30	15	39	15	706	78.1	6.62	108.42	15	1.058	1.055	1.082	0.95	1.005	1.002	1.028	0.965	1.022	1.021	0.08	0.08	0.11	-0.07	0.01	0	0.04	-0.05	0.03	0.03	0.458085	0.40265	0.183983	0.631048	0.88499	0.969369	0.704139	0.449405	0.322732	0.61257	0.889498	0.902448	0.922119
FALSE	High	Master Protein	TGGT1_247450-t26_1-p1	transcript=TGGT1_247450-t26_1 | gene=TGGT1_247450 | organism=Toxoplasma_gondii_GT1 | gene_product=hypothetical protein | transcript_product=hypothetical protein | location=TGGT1_chrXII:3275746-3284022(+) | protein_length=2303 | sequence_SO=chromosome | SO=protein_coding_gene | is_pseudo=false	MDDFSPGRRSPRGTSREAADRRRGSPRWPSRDREERRSPRRSSSSRGRGEEIFPSRGGVRREGASPEPKSGRDLPRANSVQRDDELASRRRASGRRDSREVVGRDRRTSTQRDARGPLSPPYGSQRRFERRSPSPYRGGEREARSRGENDRKRGRSRESSEGGRQVRRESRRIEEGEEGGFSHFGYRGDEGRRDEPRGERGGRGGEDWRREDPGRRVLSERDEEFASRDNGAGRDREARETDERESSLSRPLPRDKRSRDDSSERREDRQGSRRGTVASLEDRSRRRVSRSPGQGKEKQERGSLPSFYSVREREEREGREEREEKGERGSEKADELPRGERRGGSVAEASRRAEGEKDRFSGGREETSRRRESPTGRRRLSSDSLRLPETGRDRSSDSI…	0	96.785	14	28	53	28	2303	245.7	10.01	108.54	28	0.955	0.967	0.966	1.022	0.976	0.989	0.988	0.999	1.003	0.992	-0.07	-0.05	-0.05	0.03	-0.04	-0.02	-0.02	0	0	-0.01	0.543694	0.621718	0.533639	0.533936	0.552276	0.728839	0.533092	0.975797	0.947578	0.444328	0.889498	0.902448	0.922119
FALSE	High	Master Protein	TGGT1_229360-t26_1-p1	transcript=TGGT1_229360-t26_1 | gene=TGGT1_229360 | organism=Toxoplasma_gondii_GT1 | gene_product=Transaldolase [Source:UniProtKB/TrEMBL;Acc:S7V2K7] | transcript_product=transaldolase | location=TGGT1_chrVIII:196233-200460(-) | protein_length=550 | sequence_SO=chromosome | SO=protein_coding_gene | is_pseudo=false	MYLCMHASVPIYMSSGMCLSRRVNLCRNTLKALENIARWLSCLRSTYSRRRDSVFLSFSATLSRSTKAASTERTCGSSAHTNTGTDLPALPRVRRSTFRLREFFPSFLEFTDCRLQSFLVSRRVPRHSVRHSIQKLAFLRAVLHAPAPKQHRSAHAPFFPVAVKDTLPLFSRGIYLSVKMPQSKKRVSAAHEGAASPEAKHQKTNETNGGAAQNALEALRLLSVVVADTGDFVALKKYVPHDATTNPSLLLKAASMPQYAHLMDEAVEVAKKVHGKSARAFFQVEPDDELVEEVIDQLFVRFGVEILKIVPGVVSTEVSAALSFDVQASVEKARKLIRMYKEHGIEKDRVLIKLATTWEGCEAAKILEKEGIHCNMTLLFSFAQAVAAAEAKATLISPF…	0	96.438	33	17	59	17	550	61.4	9.25	178.07	17	1.105	1.106	1.111	0.912	1.008	1.009	1.013	0.985	1.016	1.033	0.14	0.15	0.15	-0.13	0.01	0.01	0.02	-0.02	0.02	0.05	0.496842	0.496839	0.511462	0.492165	0.547979	0.542654	0.617289	0.0195458	0.664372	0.103527	0.889498	0.902448	0.922119
FALSE	High	Master Protein	TGGT1_243250-t26_1-p1	transcript=TGGT1_243250-t26_1 | gene=TGGT1_243250 | organism=Toxoplasma_gondii_GT1 | gene_product=Myosin motor domain-containing protein [Source:UniProtKB/TrEMBL;Acc:A0A125YQD3] | transcript_product=myosin H | location=TGGT1_chrVI:2380998-2399536(-) | protein_length=1513 | sequence_SO=chromosome | SO=protein_coding_gene | is_pseudo=false	MPPKKAAEGGGAKKVERKYSAVELGDYLVGSPVFIREPSKEEKYVKAIVKSISGTQLTVDVDGSTKTVEVADCLNANVGIDPVTVVDLAKLPHANEACALEVMRERYVRDQIYTYAGRLLVAMNPFKLIPGLYEPATLTKYQNADTSRGFPTDVPPHTYAVAQTAMDMLKTTKENQSCVVSGESGAGKTETARQLMQYFATSKAGTGGARIQEIILGANPLLEAIGNAKTLRNNNSSRFGRFVSLDVAPTGGIHGGIISNYMLELSRIEFQGQGERSYHIFYQMIKGLQPDEKQKCALKDAPDYEFLNKSGCYEVETVNDLKEFADVRQQLKLLFSPEEEIDYFKCLSAVILAGNIKYKNTQAMGTDKAGKVVNEDDFQTIATLLGADGSALNEAVTIN…	0	96.428	21	28	43	28	1513	169.6	9.51	86.18	28	0.98	0.946	0.944	1.05	1.028	0.993	0.991	1.023	1.039	1.034	-0.03	-0.08	-0.08	0.07	0.04	-0.01	-0.01	0.03	0.06	0.05	0.838012	0.370343	0.433037	0.509901	0.508263	0.707507	0.199536	0.164666	0.222787	0.00772691	0.928613	0.902448	0.922119
FALSE	High	Master Protein	TGGT1_250710-t26_1-p1	transcript=TGGT1_250710-t26_1 | gene=TGGT1_250710 | organism=Toxoplasma_gondii_GT1 | gene_product=Microneme protein MIC10 [Source:UniProtKB/TrEMBL;Acc:A0A125YLT8] | transcript_product=microneme protein MIC10 | location=TGGT1_chrXII:5071359-5071955(+) | protein_length=198 | sequence_SO=chromosome | SO=protein_coding_gene | is_pseudo=false	MALSSLNNIRPFSGLLGCGLLFGALVVVVACVFSVPVEAGVLRKVAGAGSLQASIGEHDFFNDYDQDEEYRKRQQELQNQSPEEVEEAKRKYHEELRRKAEEDAETKRKQEAVIQELKEVAKKRGLREAAEREEKRIDEQQANYEQRQQELRDMDSAMEERLMQQRKKDQEERELARKNSDKVMEELKEKLARRRKSM	0	96.365	49	14	64	14	198	23.1	5.87	204.77	14	1.401	1.365	1.346	0.739	1.036	1.009	0.995	0.989	0.95	0.977	0.49	0.45	0.43	-0.44	0.05	0.01	-0.01	-0.02	-0.07	-0.03	0.541493	0.532885	0.555134	0.627743	0.712424	0.949417	0.968136	0.539606	0.257657	0.724788	0.889498	0.902448	0.922119
FALSE	High	Master Protein	TGGT1_251850-t26_1-p1	transcript=TGGT1_251850-t26_1 | gene=TGGT1_251850 | organism=Toxoplasma_gondii_GT1 | gene_product=Serine/threonine-protein phosphatase [Source:UniProtKB/TrEMBL;Acc:S7V0E9] | transcript_product=serine/threonine protein phosphatase | location=TGGT1_chrXII:5533146-5545757(+) | protein_length=1034 | sequence_SO=chromosome | SO=protein_coding_gene | is_pseudo=false	MGFSIGDVVAVYGHKAHIRYVGPLPPNPFGKKQKVSQTGFGVEFSDRKLGDNDGSVDGKQYFKCKLGMGLFVTENRARPYDEKDCSATQLQAAWRSYRARQAFQDAAAFNFWNELDAFEEKDALVKNRDVGTPTLNTIKKQIHEQSMVDTLEETNERDQASYLAVPGTDANRGSAPPRSRRRSSTRRSFGRSSVDASSISAENIPDDYAGPRVKWPITREFCLDLVDHYRDNPDVPLPRKYALELIMAIADHYRETMKGAVVEVEIPKKGGSRLVLVGDTHGQLNDVLWIFYKFGPPSATNVYLFNGDIADRGRYAVEIFMMLFAFKLQCPSSVVINRGNHESADMNEVYGFAQEVRQKYGGFMYQKFQEVFHLLPLCVVMEKRVFVVHGGLCRKDNVT…	0	96.351	26	24	39	24	1034	117.3	6.19	123.26	24	0.969	0.969	0.986	1.019	0.987	0.987	1.005	0.991	1.023	0.979	-0.05	-0.05	-0.02	0.03	-0.02	-0.02	0.01	-0.01	0.03	-0.03	0.143859	0.555203	0.751878	0.749292	0.788086	0.308941	0.741319	0.67011	0.12724	0.118837	0.889498	0.902448	0.926621
FALSE	High	Master Protein	TGGT1_309752-t26_1-p1	transcript=TGGT1_309752-t26_1 | gene=TGGT1_309752 | organism=Toxoplasma_gondii_GT1 | gene_product=Succinate--CoA ligase [ADP-forming] subunit beta, mitochondrial [Source:UniProtKB/TrEMBL;Acc:A0A125YHZ3] | transcript_product=putative succinate-Coenzyme A ligase, beta subunit | location=TGGT1_chrXI:749202-752425(+) | protein_length=498 | sequence_SO=chromosome | SO=protein_coding_gene | is_pseudo=f…	MALSAAGVGRQVLSAAARLSCSTSSAPLRATISSVTAASATSSSLLPSLLCATHRATGATSPSHQREQRRFLNLHEYQSMRIMKEFHITTPKFAVASTAKEAEQEAATFLSESPSGDGEPVDFVVKAQVLAGGRGLGFFRENGYQGGVQVCESPREVGIVAEKMLGKTLVTKQTGKEGKLCNKVLVTERFFIRKEKYVAILMDRGAGGPILIGSARGGTSIEDIAHNYPESIHKMPIDINQGISEPRLREFAELLGFSGDRLEAACQCIRGLYELFRSKDCTQIEVNPLVETHDGRVLVCDAKLNFDDNAGFRQKDIFSQRDYSQEDPREVAADAADLNYIGLEGSIGCMVNGAGLAMATMDIIHLHGGSPANFLDVGGGADQHQIIEALKIIQQDKRA…	0	95.888	43	20	60	19	498	53.4	6.48	156.27	20	1.03	1.034	1.005	0.968	0.997	1.001	0.973	0.975	0.994	0.997	0.04	0.05	0.01	-0.05	0	0	-0.04	-0.04	-0.01	0	0.537941	0.575234	0.958818	0.536566	0.521002	0.905366	0.66241	0.0388012	0.668401	0.83165	0.889498	0.902448	0.984537
FALSE	High	Master Protein	Q71U36	Tubulin alpha-1A chain OS=Homo sapiens (Human) OX=9606 GN=TUBA1A PE=1 SV=1	MRECISIHVGQAGVQIGNACWELYCLEHGIQPDGQMPSDKTIGGGDDSFNTFFSETGAGKHVPRAVFVDLEPTVIDEVRTGTYRQLFHPEQLITGKEDAANNYARGHYTIGKEIIDLVLDRIRKLADQCTGLQGFLVFHSFGGGTGSGFTSLLMERLSVDYGKKSKLEFSIYPAPQVSTAVVEPYNSILTTHTTLEHSDCAFMVDNEAIYDICRRNLDIERPTYTNLNRLIGQIVSSITASLRFDGALNVDLTEFQTNLVPYPRIHFPLATYAPVISAEKAYHEQLSVAEITNACFEPANQMVKCDPRHGKYMACCLLYRGDVVPKDVNAAIATIKTKRTIQFVDWCPTGFKVGINYQPPTVVPGGDLAKVQRAVCMLSNTTAIAEAWARLDHKFDLMY…	0	95.881	35	13	91	8	451	50.1	5.06	272.95	13	1.001	0.979	1.007	0.987	0.988	0.966	0.994	1.019	0.992	0.996	0	-0.03	0.01	-0.02	-0.02	-0.05	-0.01	0.03	-0.01	-0.01	0.963912	0.141924	0.720547	0.535678	0.119827	0.177623	0.861045	0.425521	0.609249	0.604843	0.983686	0.902448	0.922119
FALSE	High	Master Protein	TGGT1_245490-t26_1-p1	transcript=TGGT1_245490-t26_1 | gene=TGGT1_245490 | organism=Toxoplasma_gondii_GT1 | gene_product=Microneme protein MIC8 [Source:UniProtKB/TrEMBL;Acc:A0A125YJZ7] | transcript_product=microneme protein MIC8 | location=TGGT1_chrXII:2242495-2244549(+) | protein_length=684 | sequence_SO=chromosome | SO=protein_coding_gene | is_pseudo=false	MKANRIWCFFAWRMVVRASFLKEMDSIFVSAIRQNVQHTHSALLAKLKEPPDPDDENSWLCRISKKYDACGSREYSDKGLKGTYCPEDFCCSKTACFYGSCGSWCHDNWALCSSSIIYHDEYSYGKCNCKRFQENCDVNAICVHANREDGGAYCQCKEGYWGDGKSCKIDFCQLQPCGAGTCTRTDEGYKCDCPETHKLIVVEDKETCKAKPDFCAEEPCGPPSMVENCVNTDDSYECVCKQGYEVRNGRCEEIDLCADKPCGPDEGVHECVTERQPKLRYRCTCKAGFDLTTLPDGVSQKCLKNFCYEEPCGTRDLVESCKSKAYGYSCLCAAGAMVQVINGKEKCIKADLCRNDPCGPETAVIQCYSHGTSYRCLCKAGYTEVFVNGKSSCQKGDPC…	0	95.79	34	19	59	19	684	74.5	5.43	166.83	19	1.099	1.122	1.097	0.922	1.014	1.034	1.012	1.025	1.026	1.026	0.14	0.17	0.13	-0.12	0.02	0.05	0.02	0.04	0.04	0.04	0.354713	0.30137	0.51103	0.473365	0.540767	0.279256	0.684444	0.432322	0.313658	0.385517	0.889498	0.902448	0.922119
FALSE	High	Master Protein	TGGT1_214080-t26_1-p1	transcript=TGGT1_214080-t26_1 | gene=TGGT1_214080 | organism=Toxoplasma_gondii_GT1 | gene_product=Toxofilin [Source:UniProtKB/TrEMBL;Acc:A0A125YQJ5] | transcript_product=toxofilin | location=TGGT1_chrX:5904318-5905055(+) | protein_length=245 | sequence_SO=chromosome | SO=protein_coding_gene | is_pseudo=false	MAQYKSRPLAAFLLLITVGSLLTASESVQLSEGMKRLSMRGRSPSPKRGRFESGDEGTSTMSPSVAARQQELGLLRPEERLIAGQAKAAALQTVHQLGAVALTPEQAKAALLDEILRATQNLDLRKYENLNTEQQKAYEQVQRDLSQLSPETKALLIENQRKEKTLLEKARKLFQRRHYHVTKQAALAGQILNEQRDASGALQSGAVKTAIQRANEQYNVAEEDKNFNEEQHASQLKKVGAMPSS	0	95.602	62	15	78	14	245	27.1	9.57	232.15	15	1.05	1.038	1.035	0.97	1.019	1.006	1.004	1.007	1.019	1.038	0.07	0.05	0.05	-0.04	0.03	0.01	0.01	0.01	0.03	0.05	0.488284	0.573636	0.567734	0.603475	0.156278	0.362746	0.0274506	0.0912619	0.344451	0.120315	0.889498	0.902448	0.922119
FALSE	High	Master Protein	TGGT1_267080-t26_1-p1	transcript=TGGT1_267080-t26_1 | gene=TGGT1_267080 | organism=Toxoplasma_gondii_GT1 | gene_product=AAA domain-containing protein [Source:UniProtKB/TrEMBL;Acc:A0A125YSZ9] | transcript_product=putative 26S protease regulatory subunit 4 | location=TGGT1_chrIX:625144-630490(+) | protein_length=441 | sequence_SO=chromosome | SO=protein_coding_gene | is_pseudo=false	MGNAQPRGGGFPGGSEEDKKKERKRLEAAPPTHIGKRKKKGKGPVGHSRLPTVTPITKCRLRLLRLERIKDYLLLEEEYILNQEQRKPAEEKNEEDVNRVDELRGSPLSVGNLEEIIDEQHAIVSSSIGPEYYVNILSFVDKDLLEPGCSVLLHNKTSSIVGILNDEVDPLISVMKVEKAPLETYADIGGLEKQIQEVKEAVEFPLTHPEFFDDIGISPPKGVILYGPPGTGKTLLAKAVANETSATFLRVVGSELIQKYLGDGPKLVREMFKLAHEHAPSIVFIDEIDAVGTKRYDATSGGEKEIQRTMLELLNQLDGFESKGDVKVIMATNRIESLDPALIRPGRIDRKIQLPNPDAKTKRKIFQIHTAKMTMADDVDLEEFVMAKDELSGADIKAT…	0	95.426	56	21	61	20	441	49.1	6.42	136.78	21	1.074	1.086	1.053	0.952	1.023	1.034	1.002	1.019	0.99	1.021	0.1	0.12	0.07	-0.07	0.03	0.05	0	0.03	-0.01	0.03	0.27137	0.135698	0.182237	0.335619	0.107714	0.199791	0.89709	0.402157	0.481208	0.693087	0.889498	0.902448	0.922119
FALSE	High	Master Protein	TGGT1_254690-t26_1-p1	transcript=TGGT1_254690-t26_1 | gene=TGGT1_254690 | organism=Toxoplasma_gondii_GT1 | gene_product=Hydrolase_4 domain-containing protein [Source:UniProtKB/TrEMBL;Acc:A0A125YUU0] | transcript_product=phospholipase/carboxylesterase | location=TGGT1_chrIII:1864196-1866935(+) | protein_length=497 | sequence_SO=chromosome | SO=protein_coding_gene | is_pseudo=false	MESGEIGSGEAANPAASIFLAIAGFAARATWVGGLILLCMVVLLWYFQEKLLFYPGVPQGFETPDKNPKGLRSPAERGLPFEELWLRTVDGVKLHCWLIKQKLPQVAAHAPTLIFFHGNAGNVGFRLPNVELLYKHVGVNVLIVSYRGYGFSEGSPTEAGVYRDGEAALDMLIERQNELHIDANKIFLFGRSLGGAVAIDLAVQRPHQVRGVIVENTFTSLLDMVWVVFPLLRPFQRTVRILQRLYMDNGEKIQRLRLPILFISGQKDELVPTRHMKKLFELCPSPLKEKEDVPLGGHNDTWEWAIGGKSYYDRIAAFIQHALQFEDQQSRQQIDESGLTRRRPSSSPSDTLTIPSISKSGAQVLEEEERSVHDLPLSVTPADAAAMCSSGASESVLPK…	0	95.425	55	22	44	22	497	54.2	6.1	113.93	22	0.965	0.974	0.986	1.008	0.973	0.981	0.994	0.976	1.002	0.984	-0.05	-0.04	-0.02	0.01	-0.04	-0.03	-0.01	-0.04	0	-0.02	0.678986	0.79398	0.841788	0.935292	0.29512	0.0419256	0.839898	0.364249	0.742744	0.0270481	0.889498	0.919757	0.944814
FALSE	High	Master Protein	TGGT1_214210-t26_1-p1	transcript=TGGT1_214210-t26_1 | gene=TGGT1_214210 | organism=Toxoplasma_gondii_GT1 | gene_product=PUA domain-containing protein [Source:UniProtKB/TrEMBL;Acc:A0A125YRK0] | transcript_product=rRNA pseudouridine synthase | location=TGGT1_chrX:6002905-6008379(-) | protein_length=505 | sequence_SO=chromosome | SO=protein_coding_gene | is_pseudo=false	MKEATSDPGLVASAGTEGGKKKKKTDNYAIEPNSSSPPIDTSKWPLLLKHYDRLNVRTGHYTPLPHGCSPLCRPLQQYINYGAMNLDKPANPSSHEVVAWLKKILRVEKTGHSGTLDPKVTGCLLVCINRATRLVKSQQSAGKEYVCIIRFHAKPESKAKVARALETLTGALFQRPPVVAAVKRQLRIRTIYASRLLDYDEQRHMAVFWAKCEAGTYIRTLCVHLGLVLGCGAHMQELRRVRSGNLGERDHLVTMHDVLDAMHVYDSTRDETYLRRTIFPLELLLTGFPRIVVKDSCVNAICYGAKLMIPGVLRFESGIEVHQEVVLMTTKGEAIALGVAQMTSSVIATVDHGVVSTVKRVLMDRDTYDMRWGYGPRASEKKKMILAGLLDKKGKPNEK…	0	95.262	37	19	50	17	505	56.7	9	147.3	19	1.007	1.034	1.018	0.966	0.973	0.999	0.983	0.995	0.999	0.989	0.01	0.05	0.03	-0.05	-0.04	0	-0.02	-0.01	0	-0.02	0.825832	0.0546929	0.0083092	0.0838308	0.421465	0.692945	0.175832	0.615796	0.978355	0.233557	0.925148	0.902448	0.922119
FALSE	High	Master Protein	TGGT1_213870-t26_1-p1	transcript=TGGT1_213870-t26_1 | gene=TGGT1_213870 | organism=Toxoplasma_gondii_GT1 | gene_product=Ubiquitinyl hydrolase 1 [Source:UniProtKB/TrEMBL;Acc:S7UPJ5] | transcript_product=UBA/TS-N domain-containing protein | location=TGGT1_chrV:1257750-1267360(-) | protein_length=1071 | sequence_SO=chromosome | SO=protein_coding_gene | is_pseudo=false	MANSRPQGEATLPFSPYFGAFAETTPQDATEDLLVELRTLLGHARVATCMDTVVKTQCTYSLDSPLSPCGLFVNLSTFLAASIDALPLDCLLAKETSGPAPAPAPDAKQICPRQRLYLHVYSKVDDEQAAKIHRQLHEAKGRGTPSDEKSQSLPPEDGTDISAEVGGEVQPHKLAINVEGGFQIEENSGDACPEALSNTFVYSLALLPPLLTLPRTSYRSTYLSSAVDCQDSAKMQEAWERSVLKQVKFVKINDALPEVLRAACQALIEHRGLGGAAASTGIGAWEEELKPSRYAENLEQVPNPPLVGPTDWRCADCGATANLWLNLSDGYIGCGRKLYGVGGGCADGREGAAIRHFEETGSKYPLIVKLGTITPYSADVYCYAPDEDCSVLDPKLPDH…	0	95.103	24	20	40	20	1071	117	5.1	100.01	20	0.948	0.949	0.97	1.058	1.002	1.004	1.026	1.004	1.01	0.993	-0.08	-0.08	-0.04	0.08	0	0.01	0.04	0.01	0.01	-0.01	0.532753	0.186839	0.73387	0.378355	0.927947	0.89724	0.554197	0.811891	0.813062	0.684717	0.889498	0.902448	0.923577
FALSE	High	Master Protein	TGGT1_262620-t26_1-p1	transcript=TGGT1_262620-t26_1 | gene=TGGT1_262620 | organism=Toxoplasma_gondii_GT1 | gene_product=RNA recognition motif-containing protein [Source:UniProtKB/TrEMBL;Acc:A0A125YHM1] | transcript_product=RNA recognition motif-containing protein | location=TGGT1_chrVIIb:1093901-1096823(+) | protein_length=293 | sequence_SO=chromosome | SO=protein_coding_gene | is_pseudo=false	MPADEQQQQLPREGTASTEPTCRVYVGNLSWKVRWQHLKDHMKQAGEVLRADVFEDFQGRSKGCGIVEYTNVEDAQKAIKELTDTELFDRLIFVREDREDGQKFSGGRGGGYGSRGGYGARGGGPMWAGGYYGGGMYRGRGGGGYYGGYGGRFNGPPPYNMYGDMGYYGGPRAFRGRGGMRGGMRGGFGAYGGGFRGGRGGYAGGAGGHGDGSGRQVFISNLPWRTSWQDLKDLFRECGDVVRADVMTMPDGRSKGVGTVLFSTPEGAQRAVEMFNEYMLDGRPISVRIDRVA	0	95.038	56	14	101	14	293	31.7	9.07	257.28	14	1.04	1.022	1.014	0.986	1.025	1.007	1	0.994	0.999	0.979	0.06	0.03	0.02	-0.02	0.04	0.01	0	-0.01	0	-0.03	0.456012	0.697317	0.852623	0.636237	0.281353	0.77523	0.995703	0.682779	0.968461	0.776643	0.889498	0.903402	0.948887
FALSE	High	Master Protein	TGGT1_268835-t26_1-p1	transcript=TGGT1_268835-t26_1 | gene=TGGT1_268835 | organism=Toxoplasma_gondii_GT1 | gene_product=hypothetical protein | transcript_product=hypothetical protein | location=TGGT1_chrVIII:6256688-6265329(+) | protein_length=669 | sequence_SO=chromosome | SO=protein_coding_gene | is_pseudo=false	MDEERDRHPGESLDFYKALPVVVKILFFAEISVSNIALARRAGIAKVPACLQWPRRALHESPYAEKLKCFMSRDARPSPEVPPRHPVSAGRRTASRKAGGQTEHADREESSSSFPTSALDDFAISFLLLFCSKMQALRRGAAIPSRLLPRRDSWMSLAPFVAPNNAAAWRKLRDGAQEVQTVIERQSTPGKPQQIDWAKWESQIAHKDILNCLKTFYTNQVQILDRALGALETAKTPAPCEGAEKGWALFDAALSACAKSVEKSEELLSNGARALWVSCSNPPVWKVNTNEWLDSDQYWQAFVEKHHFYSQYQPGVVDPEAPQEVEAFKQAWHSRMGKFNDRSDTPMLYAYMNELPSWEYYDLHRSAFLEHMTYFLVRTGGDFRFFPEMPPWQWLAHME…	0	95.009	35	18	48	18	669	76	6.83	131.18	18	0.965	0.995	1.009	1.004	0.969	0.999	1.013	1.008	1.002	1.012	-0.05	-0.01	0.01	0.01	-0.05	0	0.02	0.01	0	0.02	0.0015517	0.230067	0.145286	0.654057	0.121538	0.873681	0.194131	0.367526	0.849108	0.36211	0.889498	0.902448	0.922119
FALSE	High	Master Protein	TGGT1_247470-t26_1-p1	transcript=TGGT1_247470-t26_1 | gene=TGGT1_247470 | organism=Toxoplasma_gondii_GT1 | gene_product=Nop domain-containing protein [Source:UniProtKB/TrEMBL;Acc:A0A125YGZ6] | transcript_product=putative nucleolar protein | location=TGGT1_chrXII:3291010-3295334(+) | protein_length=536 | sequence_SO=chromosome | SO=protein_coding_gene | is_pseudo=false	MAVNEIFLLFESAPGLLLARVKGWDQIAQDTDAVQEACLDFARFKQVVEAVAFHPFSDAEEAMEVQLAITNGTSCPALLNFLNFNLPSSLKKKKGADAEAGGRAKSQAAVGVCDPALGKSLADAGFQIVFNSNVQELHRGCRQHMKKLAKQLGELPIEKFQVGLGHSYSRSKMQEDPRKQDKPIMQSIALLDSLDKNINAFAMKLKEWYGWHFPELVKICGDAEVYCKVLKVVQMKEQFDEHTQGEELLEACGGSEEIRDEVVAATKHSMGQEIGEADFVNIIRFADQVLRLCEQRRTLQEYLSTKMDFVSPNLKAVVGEVLAARLISHAGALVNLAKYPASTIQILGAEKALFRALKSKNGRTPKYGLLFHSSFIGRVQKQQHRGRMSRYLASKCALA…	0	94.784	40	16	41	16	536	59.9	8.15	130.31	16	1.017	0.999	1.052	0.988	1.005	0.987	1.04	0.981	0.989	1.03	0.02	0	0.07	-0.02	0.01	-0.02	0.06	-0.03	-0.02	0.04	0.670046	0.986426	0.389595	0.690379	0.610847	0.639763	0.2137	0.483539	0.155024	0.167799	0.889498	0.994368	0.922119
FALSE	High	Master Protein	TGGT1_298020-t26_1-p1	transcript=TGGT1_298020-t26_1 | gene=TGGT1_298020 | organism=Toxoplasma_gondii_GT1 | gene_product=DEAD-family helicase [Source:UniProtKB/TrEMBL;Acc:S7VTJ1] | transcript_product=DEAD-family helicase | location=TGGT1_chrII:2173899-2186012(+) | protein_length=1158 | sequence_SO=chromosome | SO=protein_coding_gene | is_pseudo=false	MSPELGREHGNGDTAEVSPVSVSGSEGAAEPDNARKESQRSAPEAGSQEEDDREEGEVRSSGSSDVDNGDRAAEARGGEQENEATRGRKRVLPAAGKEPPSVRRAVAVSALPAPRFSSRLPPCRPTAPSSSKKFPDGHGDIDGGAHSGASHRKQDEASVVAAVSSPPPACGVTSALPKRTFSSSTLDLQPSAGLARSPVSALSAAKQEASICPRSSRYSREEETRVGGRHVRDGDRRTREDDRRRTDDDSRDGRDDRRTREDDRRRTDDDSRDGRDDRRTREDDRRRTDDDSRDGRDDRRTREDDRRRTDDDSRNGRDDRRTREDDRRHRDEARTEGREDRRGRENDRRGREEDRVRSDGKDEDREGSGGRERDSRSGRDAVGTKRGDSARQTKEDGED…	0	94.756	27	24	37	24	1158	130.9	8.13	95.68	24	1.067	1.033	1.028	0.958	1.022	0.99	0.985	1.019	1.024	0.981	0.09	0.05	0.04	-0.06	0.03	-0.01	-0.02	0.03	0.03	-0.03	0.271078	0.402539	0.544676	0.302825	0.205461	0.863261	0.831783	0.237874	0.567025	0.317563	0.889498	0.902448	0.922119
FALSE	High	Master Protein	TGGT1_289830-t26_1-p1	transcript=TGGT1_289830-t26_1 | gene=TGGT1_289830 | organism=Toxoplasma_gondii_GT1 | gene_product=Eukaryotic translation initiation factor 3 subunit I [Source:UniProtKB/TrEMBL;Acc:A0A125YIM0] | transcript_product=putative eukaryotic initiation factor-3, delta subunit | location=TGGT1_chrIX:3281722-3286956(+) | protein_length=335 | sequence_SO=chromosome | SO=protein_coding_gene | is_pseudo=false	MRPLFLMGHARPLTWVTFNRDGDLLFTCGKDARLAVWFSENGERIGTYDCGKGVVWNCDCTLDSKRLICASADQKVMIFDVCTGAIIHEIPEGGPCKFVEWNRKPGEQNKFVVVHDAFGSQSTKAIKVWELDGPNGKPRRLWSQDDYASRCVQVRWGPYDQTIISCHENGDIMIWNAETGEYINEFRGHKQFITCLSFSDDRLLMLSSCSDGSAKLWDTIDFKCLKTYQTDRPLNACGISPRFNKAGEERKCHVMLGGGQAAEDVTTTASGEGKFEALIYHMVYQEELGSCKGHFGPLNTLCWMPDGNGYASGGEDGYVRIYHFDEPYFTDKFEP	0	94.7	56	14	50	14	335	37.7	5.69	136.36	14	1.028	1.054	1.076	0.952	0.979	1.003	1.025	0.998	0.993	0.994	0.04	0.08	0.11	-0.07	-0.03	0	0.04	0	-0.01	-0.01	0.339818	0.00882028	0.150242	0.157398	0.593901	0.831745	0.565146	0.967661	0.834205	0.876162	0.889498	0.902448	0.922119
FALSE	High	Master Protein	TGGT1_223710-t26_1-p1	transcript=TGGT1_223710-t26_1 | gene=TGGT1_223710 | organism=Toxoplasma_gondii_GT1 | gene_product=Tetratricopeptide repeat-containing protein [Source:UniProtKB/TrEMBL;Acc:S7UW94] | transcript_product=tetratricopeptide repeat-containing protein | location=TGGT1_chrX:3542707-3551157(-) | protein_length=964 | sequence_SO=chromosome | SO=protein_coding_gene | is_pseudo=false	MSKARPGSSGTNALPSKEQSLFKNLVYLYEHKHFKKAIKQADLILKKCPDHGETLSMKGLVLSNMKPENKQEAYELAKRGLRCDLKNYVCWHVLGLIYRADKDYFEAAKCFTQAVRLSPGNFQILRDLSNLQIHERNLEGFRETRRQILATRSQFIREWTAFALANHLCGSLDVAHDLLSEVEKQFEDARDMDSFDKSEIILYSASILEQAGRFEDCMKYLKEREEKITDKMSMLEMQGRLALHCGHREEARKVYSALFKRNQDNDIYALCLLACSEDPQLSRLCKLPISDSANGGLNEQGVCVELLPGCLASTGEGRAGWLPSAETRKALRRLAHLDKNVIPFTGWKRKRNSTPSPLFVVTRIPTDAEQDRLISFFDCLKSEYGKVCSLPSFLVLSFL…	0	94.587	22	24	39	24	964	109.2	8.59	112.85	24	1.006	1.039	1.012	0.973	0.979	1.011	0.985	1.009	1.002	1.012	0.01	0.06	0.02	-0.04	-0.03	0.02	-0.02	0.01	0	0.02	0.879085	0.455586	0.86579	0.444791	0.266756	0.480832	0.713573	0.250237	0.962753	0.63802	0.948136	0.902448	0.952708
FALSE	High	Master Protein	TGGT1_306330-t26_1-p1	transcript=TGGT1_306330-t26_1 | gene=TGGT1_306330 | organism=Toxoplasma_gondii_GT1 | gene_product=Hydrolase_4 domain-containing protein [Source:UniProtKB/TrEMBL;Acc:S7UI80] | transcript_product=phospholipase | location=TGGT1_chrIX:5748642-5751422(+) | protein_length=582 | sequence_SO=chromosome | SO=protein_coding_gene | is_pseudo=false	MAPQETAPRTPATPSPAKVAKQREKEIAAAKEWYKNAGPVTQTEMRNPEGLVLHGHHWVVPNARAKVVLCHGYGMHARFDYLRHDPQNLKSPPVYEGSWVHKLNKAQCSVHCLDQQSFGLSEGHKGKKSHILDIEHLPRDTLQFLYEQVLPSQDPSLPIFICGVSLGGCITARVVELVGGGSASTKHNAVQASSNGALEKKPLPLRGAICMAPLFRMERLKKKNKHLLPLARALAALAPSLEVGKPAKNEMYPFFQDLIEVDPLCYTGKSRARLSNELLRVVDTVRDQAPFFSFPDPAVKTKDSPLPYPFYVPETPSLLIVHSKNDTFVDPEGSVCVAATLGAKMDGSQETLEKYQAEYDNVVKSGKVVNHPDANLWLLDNMWHCLSKELPEGDLLMDR…	0	94.196	36	19	40	19	582	63.2	5.59	99.48	19	1.093	1.075	1.084	0.955	1.043	1.027	1.035	1.027	1.025	1.046	0.13	0.1	0.12	-0.07	0.06	0.04	0.05	0.04	0.04	0.06	0.464346	0.381979	0.318006	0.658607	0.0199406	0.521389	0.49595	0.676494	0.574794	0.565475	0.889498	0.902448	0.922119
FALSE	High	Master Protein	TGGT1_232150-t26_1-p1	transcript=TGGT1_232150-t26_1 | gene=TGGT1_232150 | organism=Toxoplasma_gondii_GT1 | gene_product=hypothetical protein | transcript_product=hypothetical protein | location=TGGT1_chrVIII:1884936-1895884(+) | protein_length=976 | sequence_SO=chromosome | SO=protein_coding_gene | is_pseudo=false	MALFRGCSNVIDESLDEFLVKHDPDYAGGRGGGAAVAPDRVASSGSDETTAFLGSGVESGLQDWRDTGGCKRSLSLTGKPRTEDDGTVRIDTQKLGRALSVAVTGLGEQVKHGGELLWRSAVTAAGQVIVQHGLQTRGGSGTGLSSPSAAALISSSLSSSSLASAVSSATCFQLQLSAGQKAWSLDSAPFSLGAWLASPSVAADVWGDGNFHVILQEQRQSEDAAGQLTAEPRAKEGEGRVNPERFTYRWRRVFPNGVLVDVPDVTGNTYFISADDIGCKVQVTCSCPRSAFVGEMHASLGPFQVDSRSRSCVLNSLARGGSRFPCCAVLEEDLAGRDGRLAASSLEADRMARREEGREFFVYVNHEEVVVTQRGGPATSSESESFLASGGVSSLLDRR…	0	93.974	26	24	44	24	976	107.5	5.77	108.05	24	0.957	0.944	0.95	1.1	1.053	1.038	1.045	0.982	0.975	1	-0.06	-0.08	-0.07	0.14	0.07	0.05	0.06	-0.03	-0.04	0	0.7177	0.463758	0.571868	0.125662	0.609237	0.45302	0.509968	0.506256	0.43035	0.995277	0.894043	0.902448	0.922119
FALSE	High	Master Protein	TGGT1_292220-t26_1-p1	transcript=TGGT1_292220-t26_1 | gene=TGGT1_292220 | organism=Toxoplasma_gondii_GT1 | gene_product=PCI domain-containing protein [Source:UniProtKB/TrEMBL;Acc:A0A125YZM3] | transcript_product=PCI domain-containing protein | location=TGGT1_chrIX:4423653-4430460(+) | protein_length=561 | sequence_SO=chromosome | SO=protein_coding_gene | is_pseudo=false	MAQDATAAPPAGAAGAAGAAEKKSAASSPLLTLCIAVEQLRQGVEQQDDRQVTRMFRQFKTLRTTCTPHTLLLVASRLLWNSDPGNAKANAEPEQGAGSSAPATTADAARSTRDEATLAFWKAMQRALHAAGAEDGTQAMDVDIPPPPAESFPLAAKDFASCLPEVEALLALLLLLRLIDSRRFAQAVEFGDLLVDRVLGSTPVGAPAPSGASETPLWRRRRLDLVGAKCIFYWYRARELDRALTPHVRAKLLNAYTVASVQHDTMTQATVLNLLLRNYIASNQYELALKLISKACFPENLRSNAQQARHLYYLGCIQAVRLEYSAAFAKLQLALRKAPQQPRVAAGFRLAVLKKAIVVELLMGDIPERAIFSRKETRAALLPYKHIVLAVRSGDLHAF…	0	93.65	43	22	49	22	561	61.6	7.49	142.47	22	1.021	1.049	1.049	0.977	0.998	1.025	1.024	1.01	1.003	1.025	0.03	0.07	0.07	-0.03	0	0.04	0.03	0.01	0	0.04	0.66309	0.402982	0.410026	0.699266	0.853446	0.259196	0.262894	0.763438	0.945196	0.596469	0.889498	0.902448	0.922119
FALSE	High	Master Protein	TGGT1_284190-t26_1-p1	transcript=TGGT1_284190-t26_1 | gene=TGGT1_284190 | organism=Toxoplasma_gondii_GT1 | gene_product=Pyruvate carboxylase [Source:UniProtKB/TrEMBL;Acc:S7UMR6] | transcript_product=pyruvate carboxylase | location=TGGT1_chrV:2598993-2613633(-) | protein_length=1391 | sequence_SO=chromosome | SO=protein_coding_gene | is_pseudo=false	MAPLTQPFALGYSLWRRSEFHKVASASDMSFPGVCVGSFSLRTRWHKSLHGAGTSARAKNAGFVSRLVDTKSRAVGFPGFRSSQNACFDSTWSSTRRPNSAHYHLLPGLLSGDLAFHFQGTREALSSSPRHPRTETFPQVANSVRCSFKPRSVPPLALPQFWRHFASTPTALSSPGVCIPGAPEGETQLEGSGAENGAEKSTWQRPVRPIRKLLVANRGEIAVRVHRACKELGITSVGIYSQEDSQALHRQVFDESYLVGRGLSAVAAYLHYPDIIDVALRHNVDAIHPGYGFLSENAEFAAAVENAGLMLVGPPPEVIRLMGDKVEARSIAERANVQAVPGTNEPVTDFEEAAAFCRQIGFPVMLKAAYGGGGRGMRRVFREEELKEAFERATSEAQA…	0	93.136	24	26	39	25	1391	152	6.99	116.33	26	1.012	1.037	1.014	0.984	0.996	1.02	0.998	1.012	1.005	0.991	0.02	0.05	0.02	-0.02	-0.01	0.03	0	0.02	0.01	-0.01	0.228915	0.618673	0.73876	0.24155	0.275754	0.745658	0.938577	0.372275	0.885724	0.904983	0.889498	0.902448	0.925372
FALSE	High	Master Protein	TGGT1_363030-t26_1-p1	transcript=TGGT1_363030-t26_1 | gene=TGGT1_363030 | organism=Toxoplasma_gondii_GT1 | gene_product=Protein kinase domain-containing protein [Source:UniProtKB/TrEMBL;Acc:A0A125YM50] | transcript_product=rhoptry protein ROP8 | location=AAQM03000199:1511-3196(+) | protein_length=561 | sequence_SO=contig | SO=protein_coding_gene | is_pseudo=false	MENCASVRSSSCLIWLAAAFFVSALGHVQQGAGVVRPRHWQNSEAAVSVRPPGGASPRHFHSPIEPVAFIDGEHVEDKHGGSWLEQEAAEEVTPLLNSHTETPTQSPSAFRRLLRRLRFWRRGRTGGSDGGGEPPQTPRPSLPTRLFQHLRRAAAAIPAAASRFFRRFRRVQEPVFPPDEFPEDVDTNPMYFRGTDPGDVVIEELFNRIPETSVWNENERVLSNANHLVSTALWRNEQSFRVESELGERPRTLVRGPVLRDDGSYICLEATDQETGEPLEVHVPYFTERPPSNAIKQLSEQVLRLRLLRGIKNQRQAKAYLRFIFPIDLVKDPKKRKMIRVRLDERDMWVLSRFFLYPRMQSNLHILGDVLLSHSSTHKSLVHHARLQLTLQLIRLAAS…	0	93.123	39	17	79	14	561	64	7.93	197.11	17	0.916	0.922	0.923	1.06	0.971	0.978	0.978	0.975	0.981	0.933	-0.13	-0.12	-0.12	0.08	-0.04	-0.03	-0.03	-0.04	-0.03	-0.1	0.457189	0.479431	0.427155	0.616965	0.170521	0.243723	0.480354	0.179933	0.307546	0.50691	0.889498	0.902448	0.922119
FALSE	High	Master Protein	TGGT1_270320-t26_1-p1	transcript=TGGT1_270320-t26_1 | gene=TGGT1_270320 | organism=Toxoplasma_gondii_GT1 | gene_product=PPM-type phosphatase domain-containing protein [Source:UniProtKB/TrEMBL;Acc:A0A125YP66] | transcript_product=protein phosphatase 2C domain-containing protein | location=TGGT1_chrVIII:5274953-5280379(+) | protein_length=538 | sequence_SO=chromosome | SO=protein_coding_gene | is_pseudo=false	MAGPRSPLRFVLLLSLLARKVFVDPPSVLPALAGESAAELSTSIDDDDFDSSSGVAVPSLTTEQEVHRTQEALDPEVVDLGKPSPYAEEESGILAASASRLNFSPMMALKSFFHMGGETGAPGHRSRIDVVKNAAMDHVHRLLQMLRESSEDEEERLLFADRREKKVITVNEWYTTTVAATMLGRRPTDEDAILVSAPATSRPNVRIKAVFDGHAGEATSQYCAKHAAKHLGKLSEFTFAEVKKACLSLDAEIIRKLGPKHVAGSTGIIVAIERLSAPVVENVVGREIVPRAHEETFVPLEKLIQEEEEAEHPELVGRYPRVPDVQQKTIPAGSFLVTAINIGDSRATLIHSDGGLTRLSKDHKPNQPTEASRIEKAGGSVETFDVPRVDGVLALSRAF…	0	93.028	44	21	50	21	538	58.7	5.08	125.99	21	1.035	1.011	1.004	0.991	1.026	1.002	0.995	0.998	0.977	0.983	0.05	0.02	0.01	-0.01	0.04	0	-0.01	0	-0.03	-0.03	0.580759	0.780883	0.965548	0.0338101	0.668213	0.958746	0.952948	0.879441	0.0693794	0.200282	0.889498	0.917043	0.988336
FALSE	High	Master Protein	TGGT1_258090-t26_1-p1	transcript=TGGT1_258090-t26_1 | gene=TGGT1_258090 | organism=Toxoplasma_gondii_GT1 | gene_product=hypothetical protein | transcript_product=hypothetical protein | location=TGGT1_chrVIIb:3544361-3553453(-) | protein_length=954 | sequence_SO=chromosome | SO=protein_coding_gene | is_pseudo=false	MATKQMLPGEGADRSSRPGTRSVARSRGTSPSSAPRLGISQELTALGSQLQALDRRQQLLFDPSVFPEDSRLAVSFPPFTRKVEDAAEAPHGAVKLRNPHRDGLDRVLGDLSKPVDLGVSLPAELQRDSFAQNDPPGRLPPALKHTSLRKLDEDAVSKFHVGVRQSARPVSYADALERTRREEDRQEKGAVRFAAATAAVAAAASAVGADADEIDCVVTVEEQAPPVCVSQGETNGGKSSGPGPGELRAEQAAAGSTVKMPADVYSAPGGAWRAAARAPSPEALAEPKVYSHSQWVDERRGEGGAPPGQFPFPRGLTEMQERMEEEWIDRERRLRADHKREMERAVAHASEKLSREYSRRLVFELQEQEKALLAQMHERHRQALAEIRCISESKTDAEE…	0	92.961	28	24	40	24	954	106	7.49	112.11	24	0.941	0.938	0.929	1.098	1.033	1.03	1.02	1.018	1.033	0.986	-0.09	-0.09	-0.11	0.13	0.05	0.04	0.03	0.03	0.05	-0.02	0.634239	0.603736	0.480213	0.215748	0.689879	0.694009	0.685088	0.816715	0.678833	0.658297	0.889498	0.902448	0.922119
FALSE	High	Master Protein	TGGT1_215590-t26_1-p1	transcript=TGGT1_215590-t26_1 | gene=TGGT1_215590 | organism=Toxoplasma_gondii_GT1 | gene_product=Succinate dehydrogenase [ubiquinone] flavoprotein subunit, mitochondrial [Source:UniProtKB/TrEMBL;Acc:A0A125YLN0] | transcript_product=flavoprotein subunit of succinate dehydrogenase | location=TGGT1_chrX:6924001-6933881(-) | protein_length=669 | sequence_SO=chromosome | SO=protein_coding_gene | is_p…	MHASASLTQALRPYARRPLSSALSRSSLSPALAAGVARGLNAAQPQATGPSFVQQKRFFTNVKKPAYRVIDHEYDAIVVGAGGAGLRAAFGLASAGIKTACLSKLFPTRSHTVAAQGGINAALGNMTEDDWRWHAYDTVKGSDWLGDQDAIQHMCREAPKVVRELESYGLPFSRTEDGRIYQRAFGGQSLRFGKGGQAYRCAAAADRTGHAMLHSLYGQSLAHDCKFFVEYFALDLMMSGENDERKCHGVVAMCMEDGSIHRFAAKHTVLATGGYGRAYQSCTSAHTCTGDGGGMVSRAGLPLEDLEFVQFHPTGIFPAGCLITEGCRGEGGILRNGQGEAFMARYAPTAKDLASRDVVSRSMTIEIREGRGCGPNRDHIHLDLTHLPPATLHERLPGI…	0	92.922	27	17	73	17	669	72.7	8.19	209.08	17	1.086	1.082	1.096	0.923	1.003	0.999	1.012	1	1.004	1.003	0.12	0.11	0.13	-0.12	0	0	0.02	0	0.01	0	0.538956	0.644218	0.568669	0.567015	0.653681	0.979202	0.57983	0.985212	0.0710348	0.919182	0.889498	0.902448	0.922119
FALSE	High	Master Protein	TGGT1_318710-t26_1-p1	transcript=TGGT1_318710-t26_1 | gene=TGGT1_318710 | organism=Toxoplasma_gondii_GT1 | gene_product=ATP-binding cassette sub-family F member 1 [Source:UniProtKB/TrEMBL;Acc:A0A125YVQ3] | transcript_product=ATP-binding cassette sub-family F member 1 | location=TGGT1_chrIV:1070737-1079983(+) | protein_length=811 | sequence_SO=chromosome | SO=protein_coding_gene | is_pseudo=false	MGQDSESIIDALRTVTCGKVDDGTLEYMAGMLEEEGVARLSVDTACDLIGDFLHDAGVSKNDKETRAVCEKLLSLLRKDAAPRDNAAGGPSEQTQGGNSTDDLDGSGVKRADGEGSLSKPRDFATPMKLGDMAGHSGRSFDDPFLGLHQNSAKVNYNAPVLYGTDPEGAAAAAAAAQQQQRLQQQRERHLRQLKEWEKNKPPLPPPKRKHGDKQLKKMGEGILVDSFSIAVAGRELLIDAQLKLVKGRRYGLVGRNGIGKSTLLSALVRQEIHGVDPDIAIGMVEQEHLWGSETVLDAVLAVDEDRLRLLEEEQVLLKQEDQSEKVGRRLGVIYERLQEIDAANAEKTAATILRGLGFTESMQHMKVTALSGGWRMRVLLARCLFSDPDVLLLDEPTNH…	0	92.861	28	20	43	20	811	89.1	5.91	121.15	20	0.956	0.923	0.934	1.077	1.03	0.994	1.006	1.03	1.017	1.026	-0.07	-0.12	-0.1	0.11	0.04	-0.01	0.01	0.04	0.02	0.04	0.690597	0.405945	0.616859	0.583822	0.24645	0.907115	0.222728	0.40197	0.397683	0.345918	0.889498	0.902448	0.922119
FALSE	High	Master Protein	TGGT1_280540-t26_1-p1	transcript=TGGT1_280540-t26_1 | gene=TGGT1_280540 | organism=Toxoplasma_gondii_GT1 | gene_product=HEAT repeat-containing protein [Source:UniProtKB/TrEMBL;Acc:S7W9G6] | transcript_product=HEAT repeat-containing protein | location=TGGT1_chrVIIa:291701-308826(-) | protein_length=3381 | sequence_SO=chromosome | SO=protein_coding_gene | is_pseudo=false	MSAAPASSASGEAPNAASGIAEMEKKKKEYENTLLRLTLCNDDRLPAVLDKLLPIAFREMASCPAQLLPKVIEIVNHCLHRLRGTSSMRLPLSGLVDTWLEAQRRQTPGPNATVMKNVLLLFLSLAVARASVEEKLKAAEALLVGLPLFFPHTYAAAFVLFCECICNAETLSSLKEKAKALAANKEVKGVTFECLSKILAGAASSSSSKTPPATQAFVHASVEFLLLPPSLPQTLASLPSSSPPASATVSAACARVSGVSSDAAEAWMQRLRGKSREEMLSLQTHLVRFMIEVTRFAPLHVVEQQRQEAQRQEAQQREEAEATLGEWAKSGVSPGQLGAQPPACAVPAIMLAPLLVASCLPFDVLASPAETAIARLGVSVDRGDSVLLFFLFNLISSQP…	0	92.752	9	30	38	30	3381	365	6.02	87.72	30	0.869	0.86	0.874	1.156	1.004	0.994	1.011	0.961	0.991	0.972	-0.2	-0.22	-0.19	0.21	0.01	-0.01	0.02	-0.06	-0.01	-0.04	0.519885	0.587979	0.610396	0.510766	0.0377988	0.925264	0.830514	0.256781	0.760793	0.69902	0.889498	0.902448	0.922119
FALSE	High	Master Protein	TGGT1_285870-t26_1-p1	transcript=TGGT1_285870-t26_1 | gene=TGGT1_285870 | organism=Toxoplasma_gondii_GT1 | gene_product=SAG domain-containing protein [Source:UniProtKB/TrEMBL;Acc:S7UNS7] | transcript_product=SAG-related sequence SRS20A | location=TGGT1_chrV:2015649-2017548(-) | protein_length=328 | sequence_SO=chromosome | SO=protein_coding_gene | is_pseudo=false	MVSCKRLAASRRQCLFFNACLFCLFICTVQIRAIAGADPEKCDQDGSLLNLRVTGNSSVEFKCGGAVPNLHPNPGKTPPIVCENSSCTNEVPLNIPNATLVKDSSGKATFTVSDASVGATTVYLKCSSLANTAARVGAGQPGQEAEKEKTCIVQTSVWGPPIKGSKEYPTPDACKNGTLSLEVNPSKKSVTFACGDNETLSPELFDMVFSTKECTTSSTLAEHLSGASLVQHARTNAADDKKPAYTFSVTSLPTEEKTLCYQCTKKNAQMKGEAQNTCKVLIKVAKQETDTGSTTVAPPNESRAEHGQWNTALMISLITIPVVLMKML	0	92.329	54	17	59	17	328	34.9	7.77	187.38	17	0.943	0.918	0.904	1.124	1.06	1.033	1.017	1.077	1.053	1.077	-0.08	-0.12	-0.15	0.17	0.08	0.05	0.02	0.11	0.07	0.11	0.340319	0.29669	0.0290622	0.199496	0.0346558	0.09612	0.709698	0.256886	0.00236317	0.195371	0.889498	0.902448	0.922119
FALSE	High	Master Protein	TGGT1_269690-t26_1-p1	transcript=TGGT1_269690-t26_1 | gene=TGGT1_269690 | organism=Toxoplasma_gondii_GT1 | gene_product=hypothetical protein | transcript_product=hypothetical protein | location=TGGT1_chrVIII:5679281-5681878(+) | protein_length=865 | sequence_SO=chromosome | SO=protein_coding_gene | is_pseudo=false	MRPLRVTVALFWAMVAVVGFWASPDSRLTVRGPQFADAATRGVVKSLKRAMNQGWRNGAHSICAILGCDYEHVKAHLTHKPTFFHSFKAVCAQLDEFEEEVTHAKMREEDLTPSQREYRWLLLSKGAALINDALGTQFEVPASYVPHNAKNRHYIPGQRGEGDDKEKLKTRMRGLQVVVPLPTLEEIQKDGMDRLAAVREKHMAQIKELEDARHRKFLLLQEEHDRQTDQLVSELRLKHTEEMDTIRRELAEERRLFEQSVKVWDAVSRLLTDAHVGIETLTDRVHTMSQHVFKLNVFYEKLHSFQQTAKENPTGAAPYSALSYAFQSEAAVDQAMHQIVAIYQEASAGVARVQEILNQADGVMATAPTRDDAAWFQQRQRGYKDRLESFVNLLSDLSV…	0	92.314	29	24	53	24	865	94.2	7.2	126.23	24	0.999	0.998	0.992	1.056	1.055	1.054	1.047	1.022	1.003	1.025	0	0	-0.01	0.08	0.08	0.08	0.07	0.03	0	0.04	0.966592	0.96785	0.723941	0.116461	0.341134	0.456898	0.350864	0.0293789	0.811281	0.125	0.983686	0.988442	0.922324
FALSE	High	Master Protein	TGGT1_309730-t26_1-p1	transcript=TGGT1_309730-t26_1 | gene=TGGT1_309730 | organism=Toxoplasma_gondii_GT1 | gene_product=Thioredoxin reductase [Source:UniProtKB/TrEMBL;Acc:S7W164] | transcript_product=thioredoxin reductase | location=TGGT1_chrXI:735920-743442(-) | protein_length=662 | sequence_SO=chromosome | SO=protein_coding_gene | is_pseudo=false	MSCLSVSAARAYAAAAASRPVSASFLPAFSRLSQCSFLSENCVLRCTSSVYPASHSTHRTNALQSTLSAVVPPERLPCTPLAHAAAVVAVWNSGSLLVSTPLFSVCRTETSSCAPPAQRQQERAFASERKLSVISTNASEMAPTNTNNGAPSCADGEFDYDLAVIGGGSGGLACAKMAAAQGAKTVVFDFVQPSTQGSTWGLGGTCVNVGCVPKYLFHHTGLAGANAHWDGPHMGWKGKFEEQVDWGVCVEKVQNYIKSLNFGYRTGLRKAGVTYINAYAKFVSPHELAYTFRGEDKICKARNIVVAVGGRPHIPEEVEGAKELAITSDDIFSLKQAPNKTLCVGASYISLECAGFLRELGFDVTVAVRSILLRGFDRQCAEQVGLCLEEAGVRILRET…	0	92.3	21	12	43	12	662	70.6	6.67	137.3	12	0.995	0.99	0.983	1.03	1.024	1.02	1.013	1.066	1.039	1.053	-0.01	-0.01	-0.02	0.04	0.03	0.03	0.02	0.09	0.06	0.07	0.565932	0.865858	0.784273	0.574279	0.576028	0.269066	0.450193	0.124924	0.406197	0.51586	0.889498	0.948845	0.931294
FALSE	High	Master Protein	TGGT1_270865-t26_1-p1	transcript=TGGT1_270865-t26_1 | gene=TGGT1_270865 | organism=Toxoplasma_gondii_GT1 | gene_product=Putative adenylate cyclase [Source:UniProtKB/TrEMBL;Acc:S7WDA0] | transcript_product=putative adenylate cyclase | location=TGGT1_chrVIII:4921378-4938757(-) | protein_length=2040 | sequence_SO=chromosome | SO=protein_coding_gene | is_pseudo=false	MRESRLGNILHNVVSGAGGLVHAGWHGVQHAINANSGSDEEGFIRKAGPARLNLTPERPPPIEEAPETLANHGDAVSQDWRWLALRCEQRLNAVLQQRTTKSAKLTDTLGPSFDIRQFACFMPRTVLEAIADRRIRHSDDFDIQIEQFTAAVVFCDASGFTALTEALDTKPNGAERLGNIINQFFDKIIKIVHYWGGDVIKFSGDAMTIVWPVDDESPQPDADGSEKDGKAAREEETGDDFYRIDSQVACQLAVQCCLTLHQTLHGYVTGCDDKVLTLHIGVGFGQVHILQVGGIMDRWEYVVAGAPLEEISVAEPLAGSGETVVSPSVASALAGAADLEEVPNSPPGRIFYKVKGLHAAGPEKAKSIAVGISRSSTRALWGSEKPREQIEEVETLPVQ…	0	92.3	15	28	39	28	2040	222.6	6.34	91.4	28	1.034	1.047	1.067	0.926	0.958	0.969	0.989	0.978	0.966	0.922	0.05	0.07	0.09	-0.11	-0.06	-0.04	-0.02	-0.03	-0.05	-0.12	0.680908	0.661276	0.187539	0.442292	0.0360353	0.263177	0.838442	0.54121	0.0853484	0.291081	0.889498	0.902448	0.922119
FALSE	High	Master Protein	TGGT1_318140-t26_1-p1	transcript=TGGT1_318140-t26_1 | gene=TGGT1_318140 | organism=Toxoplasma_gondii_GT1 | gene_product=SART-1 family protein [Source:UniProtKB/TrEMBL;Acc:S7UKH3] | transcript_product=SART-1 family protein | location=TGGT1_chrIV:1468174-1476334(+) | protein_length=861 | sequence_SO=chromosome | SO=protein_coding_gene | is_pseudo=false	MSESKEISLSVEETNKLRLKLGLKPLRFDDKEAAESKQSRDGERDSDDASSSAGSHAHLTQTELDQRRRQAARQLVERTEERRRKAIHSALTAGPTLGEEADDDLDDPAAWVARMRKNEKEKHVLASQARVDAAHYDDSDDESAPAASAREFQTEDASMHRGKRRRERRGSISSSEGEAGEGGDVKVVHDLKEFEEGETVVLTLKDTQILTADGALNDDIDTLENVALVEKNKQRKKLRDKERKAVYDPTEDWEEGEDGQPKKKEILEHYDEWEREERAAQGKGRLPEDDRGFLLPNLQGRDLDEPVEVQIELLRERQRLVEREKQKLLGLSSLSAYHRDGVALTGPTLGRQKYDASGLCSVVISGEREATKRGDGGDAGEAVAFRKLKKKKIQKKKQG…	0	92.166	32	19	36	19	861	97.6	5.59	109.26	19	1.009	1.057	1	0.958	0.966	1.012	0.958	0.999	1.015	0.991	0.01	0.08	0	-0.06	-0.05	0.02	-0.06	0	0.02	-0.01	0.824239	0.347183	0.989648	0.479171	0.713146	0.339167	0.318763	0.989064	0.0849401	0.909315	0.924912	0.902448	0.996768
FALSE	High	Master Protein	TGGT1_259550-t26_1-p1	transcript=TGGT1_259550-t26_1 | gene=TGGT1_259550 | organism=Toxoplasma_gondii_GT1 | gene_product=Pterin-binding domain-containing protein [Source:UniProtKB/TrEMBL;Acc:A0A125YWG2] | transcript_product=dihydropteroate synthase | location=TGGT1_chrVIIb:2750606-2755609(-) | protein_length=748 | sequence_SO=chromosome | SO=protein_coding_gene | is_pseudo=false	MGCWPPSFACLRLSWWNLPLFHKRSAFFFWPPPGLRLRSLPGGAIAHCASSRSFSFGLLQSKFSHFFTRFHQGTMTANSHFLQKMREEDPGKEYATAYIALGSNLQGDARLGIIEEAISELGRCLGPILGTSCLYETVPAFDVCPKGVVHDVFHPFYLNAVVKLRTPITDPWYVLEILKNLEAKTGRPLPTPEDMEAALNDCTSSGEATNEDVPGQGNKGASRKGDWKEALKKDKYVRGAPRLLDLDLLFFDKNGRSVVIHPDVRPVDKQWPLTLPHPRIITRNFVLFPLCDLDPEYIHPVEGMSVKELLRINLERRRIHLLNAAEEARQTQELAAKTNSETSGDHIACSHRCAPPASLHFVHNYRIDGSLAIPRRCFAATTEELWTLGGDAGIVDTLL…	0	91.355	29	18	51	18	748	82.7	6.58	143.61	18	0.953	0.94	0.939	1.06	1.01	0.996	0.996	1.019	1.033	1.012	-0.07	-0.09	-0.09	0.08	0.01	-0.01	-0.01	0.03	0.05	0.02	0.397628	0.362576	0.48529	0.514824	0.767115	0.895457	0.155322	0.544957	0.213355	0.676656	0.889498	0.902448	0.922119
FALSE	High	Master Protein	TGGT1_247195-t26_1-p1	transcript=TGGT1_247195-t26_1 | gene=TGGT1_247195 | organism=Toxoplasma_gondii_GT1 | gene_product=Microneme protein MIC15 [Source:UniProtKB/TrEMBL;Acc:S7V0Y7] | transcript_product=microneme protein MIC15 | location=TGGT1_chrXII:3076266-3106706(-) | protein_length=2924 | sequence_SO=chromosome | SO=protein_coding_gene | is_pseudo=false	MGVLRVRSFPLQQRTMVFRATREPFRLPLVAAFIALFLLKGVTCQLQLGTSTLQKNMWTTVKFDEPMIDPVVFVSPPEAPTNSFALVLIGGVTTSGFRARVYFPSCEYSPSGGTLYAVRWLAVEATSAGYYDSSNRQTIDWTAHAVTLASSGTIPAGYVWSQSFSAWEDRPGTPGVLIGVQNHREMISAMYWSSEYLNPLVINSNSGGTLTFSFLRQISHRIGFTLKVGIFQYDARRGAVINGVNLVAQRYDLKVNEVLPVADVVAGGTTPATFAVQWVTPTEAPLALVVKPKLLPDGSYSESLVAVEDCRNGATYEPHAFDVTHAFTGNPASTAHRINGGPNCFRPSASVPTWLTEPCKLACESLWTANSDDYWNCDDVNACFETDFRSAETLMALPQ…	0	91.338	10	28	45	28	2924	320	5.19	104.81	28	0.916	0.905	0.906	1.101	1.008	0.996	0.997	0.989	0.967	0.979	-0.13	-0.14	-0.14	0.14	0.01	-0.01	0	-0.02	-0.05	-0.03	0.5639	0.553619	0.452539	0.467588	0.765788	0.928508	0.338131	0.48615	0.263087	0.571346	0.889498	0.902448	0.922119
FALSE	High	Master Protein	TGGT1_205510-t26_1-p1	transcript=TGGT1_205510-t26_1 | gene=TGGT1_205510 | organism=Toxoplasma_gondii_GT1 | gene_product=Nop domain-containing protein [Source:UniProtKB/TrEMBL;Acc:S7UUJ5] | transcript_product=putative nucleolar protein 5 | location=TGGT1_chrVIIa:1272709-1276843(-) | protein_length=490 | sequence_SO=chromosome | SO=protein_coding_gene | is_pseudo=false	MLVLVETPAGYGLFRVKNKKLLEVEDANDLTSFFASAEVAQKSVHLEAFAKFKDTKHALDEVLALRESKVGKSLKKFLKKHLLQTDASAQLAVSDKALGAAIRNKFGIDVVFTPTTHEIIRGIKEQLSNLLDGLSAKDRQQMAMSLAHSLNRFKLKFSPEKLDTMIIQAVALIDDLDRELNNFAMRLKEWYGWHFPELSKIVTDNLIYAKTVQLVGFRSNTRNVELSPLLPDEIAAEVKMSAETSMGTDITEEDLMHINTLANRVEELVEYRANLAEYLKVRMKAVAPNLTYMVGEVIGARLMAHSGSLLNLSKQPASTIQILGAEKALFRALKTKSHTPKYGLLFHAALVGQAPPKLKGKISRVLAAKLSLCVRVDALTEAAEAAATAAGGKAAEEVA…	0	91.23	58	21	41	21	490	54.3	9.04	118.62	21	0.957	0.998	0.993	1.015	0.972	1.013	1.008	1.005	1.008	0.998	-0.06	0	-0.01	0.02	-0.04	0.02	0.01	0.01	0.01	0	0.560316	0.976475	0.939486	0.827054	0.000920299	0.203186	0.740471	0.288874	0.487629	0.127966	0.889498	0.989994	0.977074
FALSE	High	Master Protein	TGGT1_214270-t26_1-p1	transcript=TGGT1_214270-t26_1 | gene=TGGT1_214270 | organism=Toxoplasma_gondii_GT1 | gene_product=Tr-type G domain-containing protein [Source:UniProtKB/TrEMBL;Acc:S7UR99] | transcript_product=putative translation initiation factor IF-2 | location=TGGT1_chrX:6085732-6096115(-) | protein_length=1146 | sequence_SO=chromosome | SO=protein_coding_gene | is_pseudo=false	MAPKKKGGRGGRRGGLSSDEEFEAKKPTPVPAADSTDSESSSEDSSEDERPRRGASRFALAVSSSESDSDSESESASGSESESGSESGSGSESGSEREDKSKAHDGKAAPKQAGRKVESSSSADEKEAESSDEESKNAKGGGKRKSERESDNSDEELKTKAQPSRPQGKAKASPKKAQGKGKKGKQVDDDDLDALLEEVGASVPGKAESPAVAEKGKKGKKDKKEADDLDDLLAELESPAKKGASPVAAAAASPVTVEKPAVSDEEAEGRGAAPGGLTKNQLKKQKKKQAAQKKVAQKKDDSDDETKPAPPAKKGPLSAAARAAQERLRLLKEEEERQKKEEEERKRQEEEQRKREEEEEKRRQEERALREQRRAERKQRLKEEGKLLSSKEKKERERQ…	0	90.917	20	18	38	18	1146	126.2	6.35	99.78	18	0.972	0.997	0.975	1.022	0.993	1.019	0.996	0.999	0.99	1.025	-0.04	0	-0.04	0.03	-0.01	0.03	-0.01	0	-0.01	0.04	0.622462	0.961617	0.756648	0.676288	0.285464	0.335231	0.894685	0.614572	0.189498	0.629605	0.889498	0.985772	0.926621
FALSE	High	Master Protein	TGGT1_266990-t26_1-p1	transcript=TGGT1_266990-t26_1 | gene=TGGT1_266990 | organism=Toxoplasma_gondii_GT1 | gene_product=Coatomer subunit beta [Source:UniProtKB/TrEMBL;Acc:S7UHC3] | transcript_product=beta-COP | location=TGGT1_chrIX:687782-698362(+) | protein_length=1103 | sequence_SO=chromosome | SO=protein_coding_gene | is_pseudo=false	MELERNCMLYIYSSRGDAPSTAELQKKIESPNEATKAEGMQDLIIGMTQGEAYTRLLMTVIRYAMPSKDKRVKKLTQLYLEIVGKCRPDGSLKEEMILVCNALRNDLMSPNEYVRGSTLRLLSKIRQFKVLEPLVEAILQNLTHRHSYVRRNAVMCVYSIVKNFGLDAIPAAIDQIEQMLLSEGDLTTKRNAFLVLVHCASKRAIQFILQQRSEDGTGGLGFLLSSGDLFQLALLELLRKVCRQKQQQKAGLLRLIVSILPNTLPSVAYEGACSLLALSRAPVSLKAAAGAFASLLCGNSDNNVKLIVLDRLQECVQRASRRTMEEFVIDLLRGLQTPSLEVRRKILDLVLQIVGKNSVEQLLNVLKRELLRTAEPEQLTVPRTMEYRRLLIKAVHSCC…	0	90.525	21	21	43	21	1103	121.9	6.61	115.83	21	0.905	0.908	0.937	1.074	0.971	0.975	1.006	0.993	0.973	0.973	-0.14	-0.14	-0.09	0.1	-0.04	-0.04	0.01	-0.01	-0.04	-0.04	0.55536	0.497625	0.647771	0.609825	0.356145	0.138526	0.369315	0.891474	0.515942	0.521433	0.889498	0.902448	0.922119
FALSE	High	Master Protein	TGGT1_221660-t26_1-p1	transcript=TGGT1_221660-t26_1 | gene=TGGT1_221660 | organism=Toxoplasma_gondii_GT1 | gene_product=DEAD/DEAH box helicase domain-containing protein [Source:UniProtKB/TrEMBL;Acc:S7ULG8] | transcript_product=DEAD/DEAH box helicase domain-containing protein | location=TGGT1_chrII:500317-513716(+) | protein_length=1850 | sequence_SO=chromosome | SO=protein_coding_gene | is_pseudo=false	MSSSSSSRRRRHSDFSSDDGHHHRAFSRSYYDPSRRSRRDSEERDRNSSSLHYSRHSSSRPPSERDAGRHSSRREREEERGSRSSRSGRQERRNDEGSERRTEGKSGKRRDERSQGRSERRSVAPDERHGGYDRGNDTDKSERGSRGRRQSESDSRSPSREKRRRQRRKDREAERERYSSSRGRDERDRRRHDRLSGSDSGSDGERETKRRRRSAEKSEAREEKVQRGLEKCKSLENKPREKTDKGAEEERKTRLERFKQLAKETSPNGEKDLKTSSPAKERSASPSISSKKIERPEQEAAEAATQGPTSQTSKEGSKISRLERFKALQQLKPTSGSPPSLLAPQASTSDSRATVFSAEKEKHGASEKPAGTTSFQAPSSKVSLAPSGDKRDTPQPRLR…	0	90.483	15	26	41	26	1850	201.9	8.18	95.45	26	0.993	1.012	1.048	0.971	0.964	0.983	1.018	1.03	0.982	0.99	-0.01	0.02	0.07	-0.04	-0.05	-0.03	0.03	0.04	-0.03	-0.01	0.483479	0.592317	0.270927	0.663849	0.638549	0.69988	0.648794	0.535196	0.619301	0.843301	0.889498	0.902448	0.922119
FALSE	High	Master Protein	TGGT1_313390-t26_1-p1	transcript=TGGT1_313390-t26_1 | gene=TGGT1_313390 | organism=Toxoplasma_gondii_GT1 | gene_product=Ribosomal protein RPL6 [Source:UniProtKB/TrEMBL;Acc:S7UT72] | transcript_product=ribosomal protein RPL6 | location=TGGT1_chrXI:3299999-3300967(+) | protein_length=322 | sequence_SO=chromosome | SO=protein_coding_gene | is_pseudo=false	MKVFVFQLYADACDCMRGCWGFCGLSGRREGRAVWFSRGECREIVKQLWVFFRLLRTVGQKCAFVWIVERLPTSSFFRRPSVLSPRSVACLSLRCISFPHSTRGCEHRVVTGSDLLFVAVSFRFAFPVKMAPTAAALAKKRLRTRKPKRQLYKSPAGAAKRMAKLRSSITPGTVLILLSGGHRGKRVVFLKQLAPSGLLLVTGPFKVNGVPLRRVNQRYVIATTTKVDISGVDVSSIKDEQFGASKKEKFAERKLRKKQDEGMFVQQSDSKAKQALPAQFKQLQDSVDKALLASLSKDKLLTQYLKTRFTLRGNMRPHEMKF	0	90.366	30	12	59	12	322	36.3	10.78	163.76	12	1.295	1.301	1.281	0.788	1.021	1.026	1.01	1.009	1.002	1.02	0.37	0.38	0.36	-0.34	0.03	0.04	0.01	0.01	0	0.03	0.540391	0.531796	0.554071	0.567611	0.0418144	0.089461	0.0625684	0.8277	0.909816	0.508353	0.889498	0.902448	0.922119
FALSE	High	Master Protein	TGGT1_225050-t26_1-p1	transcript=TGGT1_225050-t26_1 | gene=TGGT1_225050 | organism=Toxoplasma_gondii_GT1 | gene_product=Adenosylhomocysteinase [Source:UniProtKB/TrEMBL;Acc:S7UW44] | transcript_product=putative adenosylhomocysteinase | location=TGGT1_chrX:2464799-2467238(-) | protein_length=588 | sequence_SO=chromosome | SO=protein_coding_gene | is_pseudo=false	MRALFLSQESDDFLSPLCFLPGSPSSSFPHILQKRQPFLSLFLFAKTSQSRGRSLSVAASRKNFCGVSRQLRSSCPSSFLRVLSRSSFFAASASFLDNEPRDISASPECRKMAEQSKVKDLTLSAFGRKEIELAEGEMPGLMALRKEFGPRQPLKGAKISGSLHMTVQTAVLIETLKALGAELRWCSCNIFSTQDHAAAAIVKNNSAAVFAWKGETLEEYWWCTVMALTWGEGAGPDLLVDDGGDATLLIHEGVKAEKEFARSGALPDPAATDNLEMKVVYKILAEGLQKDPQKWSRMAANLKGVSEETTTGVHRLLQMAKKKELLFPAINVNDCVTKSKFDNVYGCRHSLPDGIMRATDVMLGGKRVVICGFGDVGKGCAAAMKGAGARVVVTEVDPI…	0	90.172	27	16	79	16	588	64.1	7.71	219.82	16	0.996	0.973	0.988	1.021	1.017	0.993	1.009	1.026	1.028	0.993	-0.01	-0.04	-0.02	0.03	0.02	-0.01	0.01	0.04	0.04	-0.01	0.472969	0.45941	0.69634	0.476338	0.606783	0.402051	0.863387	0.6003	0.395713	0.776565	0.889498	0.902448	0.922119
FALSE	High	Master Protein	TGGT1_294610-t26_1-p1	transcript=TGGT1_294610-t26_1 | gene=TGGT1_294610 | organism=Toxoplasma_gondii_GT1 | gene_product=SET domain-containing protein [Source:UniProtKB/TrEMBL;Acc:A0A125YKT4] | transcript_product=putative histone lysine methyltransferase, SET | location=TGGT1_chrIa:979977-985190(-) | protein_length=1737 | sequence_SO=chromosome | SO=protein_coding_gene | is_pseudo=false	MLSTFSKLFSGSKEESGKTSSGSEHAQQSEGNTAAVQPLDPASPEWLSYYAQVAPPEIGRWVNPKDGSGAIPYERLIENLNTLNIPAFAMKAFSAETAEDRGAPSSLASLGSRHASNASAIPVRQASLKQPRGTSRNVAQRSASEAPSSRVSHDRGQSAFQCAQSNSLGGLEHGHPAGARCRSVSVASGTSPSHQQGQTARLQSNAPSEPPLYIPVTSTTRSYVGPVREVKGLISGVGKTDLSRPGPHSQVPQDYVEVVNSRQTQYHGVPPTFRMQTSGDEDESKTYEAAGLHAPVVAGPPGRTLSQVYGTRMASNGTVHKLPAIFLQPVIDSAESTDKATAASVPDTPAKGVTYKLGQYVWSEEDIKLGTAGKPDPPLDPLVRSICSGAIFPQVVGPE…	0	90.11	18	24	34	24	1737	189.7	5.29	79.37	24	0.887	0.868	0.893	1.067	0.946	0.926	0.953	0.999	1.004	0.968	-0.17	-0.2	-0.16	0.09	-0.08	-0.11	-0.07	0	0.01	-0.05	0.496477	0.482375	0.464362	0.611865	0.28228	0.314682	0.112106	0.969122	0.878876	0.494017	0.889498	0.902448	0.922119
FALSE	High	Master Protein	TGGT1_258970-t26_1-p1	transcript=TGGT1_258970-t26_1 | gene=TGGT1_258970 | organism=Toxoplasma_gondii_GT1 | gene_product=hypothetical protein | transcript_product=hypothetical protein | location=TGGT1_chrVIIb:3019435-3037803(-) | protein_length=3039 | sequence_SO=chromosome | SO=protein_coding_gene | is_pseudo=false	MDSTTLHHPVPSSVGVDSQAVFPVSSSAYSQPASLPQGAASRPNPIAHAAASSPAASQYAAFSDAAACASELVRQVALADETDGSLENKLRGVGAWAGGCTYTQATDLRSYEENRHAFSLGQVYPEVVPLPPVLQRLLRRPKAVISETFPQQTWEETGAATGGFASAGSSAGSSAVSSAVSSAVSPASPFSPSFALAPRGILPRLQLLWVAEGATLHLWPLPGDSGSASSLFSEAACDGDDLGLVTSAPQKRLHARRLMDQQRLLHSTLSFELPASISCLEHVLLPRSLLPPAFAASFLFFSASRIWKTRVTAERRISGTSEREGTRSEADFCSDPSAPPDLVEATHFHALVAVSASSVSILALGSPPTGDAGENAFWPTPLPSSVPSSLQLYEVASLR…	0	90.08	10	26	30	26	3039	326.8	6.84	72.86	26	0.911	0.924	0.899	1.081	0.985	0.999	0.972	0.965	0.985	0.955	-0.13	-0.11	-0.15	0.11	-0.02	0	-0.04	-0.05	-0.02	-0.07	0.67029	0.460674	0.309224	0.462317	0.89707	0.302877	0.275993	0.0597063	0.200884	0.326542	0.889498	0.902448	0.922119
FALSE	High	Master Protein	TGGT1_219320-t26_1-p1	transcript=TGGT1_219320-t26_1 | gene=TGGT1_219320 | organism=Toxoplasma_gondii_GT1 | gene_product=Acid phosphatase GAP50 [Source:UniProtKB/TrEMBL;Acc:S7V1S3] | transcript_product=acid phosphatase GAP50 | location=TGGT1_chrXII:907511-910397(-) | protein_length=431 | sequence_SO=chromosome | SO=protein_coding_gene | is_pseudo=false	MAGAPVAAAPAASSRVAGDSGRSRALSSFFSVFSLCVFSVFLATPTAVVAQLKFVGLGNWGSGSYGQKTVADTLKKVAANEHISFIASPGSNFLGGVSSLNDTRWQSEFEIVYSDANGALKMPFFTVLGVDDWSRNYTSEALRTELTYAVTSEQIKDGKLAPADATEAAAAENHGYPKWTLPNWWYHYLMHFPANTGGAFINSGHKDMSVGMIFIDTWVLSSSFPFSNVTSRAWADLEKTLELAPKILDYIIVVADRAVYSSGASKGDSMLQYYLQPLLKKANVDAYISGYDFSLEVISDDNISHVSCGAGSKAAGSPIVKHSGSLYYAGETGFCLFELTAEGLVTRLVSGTTGETLYTHKQPLKNRPERKSIDAFNFVSQLPEVRYYPVPEMGKMPGR…	0	90.049	36	14	81	14	431	46.6	6.95	266.8	14	1.2	1.211	1.205	0.826	0.991	1.001	0.996	0.996	1.007	1.023	0.26	0.28	0.27	-0.28	-0.01	0	-0.01	-0.01	0.01	0.03	0.523615	0.504479	0.51787	0.497262	0.421263	0.918094	0.724131	0.728186	0.750455	0.430347	0.889498	0.902448	0.922119
FALSE	High	Master Protein	P38646	Stress-70 protein, mitochondrial OS=Homo sapiens (Human) OX=9606 GN=HSPA9 PE=1 SV=2	MISASRAAAARLVGAAASRGPTAARHQDSWNGLSHEAFRLVSRRDYASEAIKGAVVGIDLGTTNSCVAVMEGKQAKVLENAEGARTTPSVVAFTADGERLVGMPAKRQAVTNPNNTFYATKRLIGRRYDDPEVQKDIKNVPFKIVRASNGDAWVEAHGKLYSPSQIGAFVLMKMKETAENYLGHTAKNAVITVPAYFNDSQRQATKDAGQISGLNVLRVINEPTAAALAYGLDKSEDKVIAVYDLGGGTFDISILEIQKGVFEVKSTNGDTFLGGEDFDQALLRHIVKEFKRETGVDLTKDNMALQRVREAAEKAKCELSSSVQTDINLPYLTMDSSGPKHLNMKLTRAQFEGIVTDLIRRTIAPCQKAMQDAEVSKSDIGEVILVGGMTRMPKVQQTV…	0	90.046	36	23	52	22	679	73.6	6.16	115.78	23	1.043	1.008	0.992	0.999	1.042	1.007	0.991	1.064	1.042	1.016	0.06	0.01	-0.01	0	0.06	0.01	-0.01	0.09	0.06	0.02	0.246916	0.856332	0.916507	0.989129	0.446632	0.766736	0.484865	0.360022	0.0418881	0.2681	0.889498	0.943533	0.96946
FALSE	High	Master Protein	TGGT1_232660-t26_1-p1	transcript=TGGT1_232660-t26_1 | gene=TGGT1_232660 | organism=Toxoplasma_gondii_GT1 | gene_product=TPR_REGION domain-containing protein [Source:UniProtKB/TrEMBL;Acc:S7WBV4] | transcript_product=Hsp70 interacting protein HIP | location=TGGT1_chrVIII:2206171-2208838(-) | protein_length=425 | sequence_SO=chromosome | SO=protein_coding_gene | is_pseudo=false	MAALSPQKVAELKAFIGMCERDPSILHRPELSFFKEYLQSLKAAIPAERQAGAGSPDRPTTSPVPEASSDDSSLESEVEEFDEESLKDSEVIPPETSPLPPLAPEGEKELTDDELDKLGKLKEEASAACEAGNSERALEKYTEALLIGNPTALLYTRRADVLLKLKRPVACIRDCDEALKLNPDSARAYKIRGKANRLLGKWREAHSDLDMGQKIDYDEGLWDMQKLVDEKFKKIEEHERKIVRKCEEAEKKRREKEARKRRAAAQRAYEEQKQRDAAGSGGFPGGFPEGFPGFGGGAGFPGGAGGFGYSGGMPGTFPSSSCGGSGMTGTPGGCCGGMGGGCGGGMPSNSVPGGAGNLFGALNDPELKKLFENPKMMAAFQDIMSNPSSISKYASDPEV…	0	89.618	40	15	63	15	425	45.2	5.31	154.34	15	1.126	1.132	1.101	0.923	1.038	1.044	1.015	1.028	1.018	1.028	0.17	0.18	0.14	-0.12	0.05	0.06	0.02	0.04	0.03	0.04	0.535568	0.473008	0.62991	0.607497	0.291497	0.00387634	0.717765	0.488437	0.248984	0.216113	0.889498	0.902448	0.922119
FALSE	High	Master Protein	TGGT1_251810-t26_1-p1	transcript=TGGT1_251810-t26_1 | gene=TGGT1_251810 | organism=Toxoplasma_gondii_GT1 | gene_product=Eukaryotic translation initiation factor 5A [Source:UniProtKB/TrEMBL;Acc:A0A125YIS3] | transcript_product=putative translation initiation factor eIF-5A | location=TGGT1_chrXII:5518720-5519205(-) | protein_length=161 | sequence_SO=chromosome | SO=protein_coding_gene | is_pseudo=false	MSDAEDVTFETADAGASHTYPMQAGAIKKNGFVMLKGNPCKVVDYSTSKTGKHGHAKAHIVGLDIFTGKKYEDVCPTSHNMEVPNVKRSEFQLIDLSDDGFCTLLLENGETKDDLMLPKDSEGNLDEVATQVKNLFTDGKSVLVTVLQACGKEKIIASKEL	0	89.46	53	10	81	10	161	17.5	5.39	225.6	10	1.097	1.079	1.096	0.923	1.013	0.996	1.012	1.02	1.018	1.064	0.13	0.11	0.13	-0.12	0.02	-0.01	0.02	0.03	0.03	0.09	0.495765	0.498264	0.49559	0.465993	0.633206	0.508446	0.642161	0.207418	0.0455207	0.27931	0.889498	0.902448	0.922119
FALSE	High	Master Protein	TGGT1_235170-t26_1-p1	transcript=TGGT1_235170-t26_1 | gene=TGGT1_235170 | organism=Toxoplasma_gondii_GT1 | gene_product=Replication factor C subunit 1 [Source:UniProtKB/TrEMBL;Acc:S7W4E1] | transcript_product=ATPase, AAA family protein | location=TGGT1_chrX:4569043-4580176(+) | protein_length=1260 | sequence_SO=chromosome | SO=protein_coding_gene | is_pseudo=false	MDRKRGDIRAFFKPKVPPPSASAAKETRRSVSTPEDPVLSQGAVRPGGSKQEEKIVNPGDWTGRKEPVAQQPAKPVQATDPGYERADDVANQPVQLSSHGDSPDRIPKTSSMSQGRGKGGRLRRIASSDDEDSSPRHSSCLRAGAPPPGSSLGKKVSPAVEVKRRPQNERGERREDAKSRSKSKDVKQKAVEVVDVDDFFSSSVDKAVEKVLTRPPQKPTQSLQTEEMDVDEEDEEQEEKAKERGEEEAKRSSCPGRLDRVASSPKGKRPANTTSQWTKLVRSMEPEQVRQKRKKMEARQSPEVLSNSEEEMHARPRRPRQKDDEEEEYVESSEEDEESEDDDADESEEEDTNGSLKAKGRSKSHKEVQNPPSTAIARSPTAPSPSSARSWQAQQQKPE…	0	89.427	25	28	42	28	1260	138.1	8.18	86.11	28	0.96	1.008	1.007	1	0.96	1.008	1.007	0.989	0.986	1.013	-0.06	0.01	0.01	0	-0.06	0.01	0.01	-0.02	-0.02	0.02	0.637407	0.875592	0.904135	0.998817	0.210127	0.517885	0.0915191	0.648146	0.642059	0.181451	0.889498	0.951146	0.964294
FALSE	High	Master Protein	TGGT1_240810-t26_1-p1	transcript=TGGT1_240810-t26_1 | gene=TGGT1_240810 | organism=Toxoplasma_gondii_GT1 | gene_product=hypothetical protein | transcript_product=hypothetical protein | location=TGGT1_chrVI:1428984-1430684(+) | protein_length=566 | sequence_SO=chromosome | SO=protein_coding_gene | is_pseudo=false	MASSDSNAKLASQRLHSCAGGEESSGQCLEKQGAGARLRGWLAQLLPRADLPGARQKTPFNLNRYVLLLLYSIVVFTTGAVFYGWTALSAMIFKNDGFAYLCPKDASGVYVPDLRATQGKLYICDEQDAAVQKLYTMTFAVACLMSAGAGTLLDWLGPLWTELLGQLLNLVGWLFLAFSTVDRPLYYPALVFIGLGADASMLPTLCIRHLFPGSTGLIITILGSAASASFGIPLVLNTIVENHGVSVRDVSIGYCFFGPVLGVLVALLFMPRRGFALDDAGTIFREPDSGEGEGEAGPYALENGAQGGESQNAQETRRRKLLDPIVSSSFWTQFFSIRYFLIVLYFVVVSWATSYYQQAARRMFSEDVVSVIEVLLPLSFIPCILLGKVADVVGIIRVL…	0	89.415	30	14	43	14	566	61.2	5.3	141.73	14	1.137	1.135	1.112	0.898	1.021	1.019	0.998	0.988	0.978	1.01	0.18	0.18	0.15	-0.16	0.03	0.03	0	-0.02	-0.03	0.01	0.427221	0.422102	0.371184	0.399206	0.546682	0.529041	0.870236	0.458139	0.288731	0.152553	0.889498	0.902448	0.922119
FALSE	High	Master Protein	TGGT1_321450-t26_1-p1	transcript=TGGT1_321450-t26_1 | gene=TGGT1_321450 | organism=Toxoplasma_gondii_GT1 | gene_product=SANT domain-containing protein [Source:UniProtKB/TrEMBL;Acc:S7VRY8] | transcript_product=Myb family DNA-binding domain-containing protein | location=TGGT1_chrIb:1792947-1808537(+) | protein_length=4220 | sequence_SO=chromosome | SO=protein_coding_gene | is_pseudo=false	MAEPSSEDASASPESHLPSSSELHVGLEQNDVSHLPADPPAESEARPSADVPSAAVGGAPPLSTSSSFESSASSLPGAFLSRSVSSDLYDASFTVEEEDDDLLRKMHFALQDDEDSASTENAATCVSSSMGLLMDPSLGGPSSLSGASSSVSTEFFTASFASSSSSVAVSGLAPSAPSSSPPLSSQRQSPRDGNAFPLDGSEEGASPSDSGTQAGSSPAAPAPNSSGGTTPLGGGLRAGRSIGSAFAEDSSVSTAAPGGGPRLDRLGFAGSGDPLFPSLPAASSPPTQKDAERTENIVGMGLAALHKALAKKAQEAAAKAREEGSETGVSALPTRNEDFKIASLSACFLKTEDNQPNIDEAHSASVNSATDTKTKVPADAAEEPETSAKGDARREREET…	0	89.369	8	27	33	27	4220	436.3	5.21	74.18	27	1.01	0.993	1.039	0.996	1.006	0.989	1.035	0.974	0.986	1.002	0.01	-0.01	0.06	-0.01	0.01	-0.02	0.05	-0.04	-0.02	0	0.500847	0.452054	0.0849903	0.949328	0.92278	0.859972	0.61766	0.605315	0.861473	0.976395	0.889498	0.902448	0.922119
FALSE	High	Master Protein	TGGT1_318310-t26_1-p1	transcript=TGGT1_318310-t26_1 | gene=TGGT1_318310 | organism=Toxoplasma_gondii_GT1 | gene_product=Transketolase [Source:UniProtKB/TrEMBL;Acc:S7VTA7] | transcript_product=transketolase | location=TGGT1_chrIV:1364235-1371398(-) | protein_length=699 | sequence_SO=chromosome | SO=protein_coding_gene | is_pseudo=false	MPQKRRGSNAHLGEANNQPEKKKVSPGKTELGATDVLCVNTIRCLGADLPTIANSGHPGAPMGMAAMAHALWGYVLRHSGKHPQWFNRDRFVLSNGHACALLYSMLHLTGYDMSLEDLRQFRQLHSKTPGHPEAHYAAGIETTTGPLGQGISNAVGLALASEYMSAKFNKDGFPLFDNHVFVFCGDGCLEEGVSSEACSLAGHLGLHRLTVLYDDNNITIDGELHLAFSEKVQQRFKAYDWHVDVVEDGNTDVAGLVQAMENAKKRTDKPTLICVRTTIGFLSSKAGTAKVHGSPLSEEELRAVKEQCGLSPDEKLQIPEEVKQFYAQVQERGERSVEAWNALFERYKKEYPSEGEEIERMFSHKLRPEVLETLKTLGEKAKEKADSTRAHSGRMLLGI…	0	89.11	33	21	57	21	699	76.9	6.89	165.84	21	0.992	0.989	0.986	1.005	0.997	0.993	0.99	1.005	0.999	0.996	-0.01	-0.02	-0.02	0.01	0	-0.01	-0.01	0.01	0	-0.01	0.829382	0.806767	0.807202	0.930344	0.849249	0.417075	0.317006	0.48308	0.852739	0.817332	0.925148	0.925026	0.935649
FALSE	High	Master Protein	TGGT1_233120-t26_1-p1	transcript=TGGT1_233120-t26_1 | gene=TGGT1_233120 | organism=Toxoplasma_gondii_GT1 | gene_product=AP2 domain transcription factor AP2VIII-2 [Source:UniProtKB/TrEMBL;Acc:S7V332] | transcript_product=AP2 domain transcription factor AP2VIII-2 | location=TGGT1_chrVIII:2426324-2433835(-) | protein_length=2503 | sequence_SO=chromosome | SO=protein_coding_gene | is_pseudo=false	MEPSSPAAAPCASMKPERDSSPPRAVVKADPDCSVPAGSSPATFGAASPRRASLPTEPAAPAASSTSESSETVATPAGPAAEGAGPCGAPETAGAGHAQAGEGSTLLVARSTCLSILNALSLCCPEWKKKDNFRSFYFHFAQISQAADRAFLDVYLTIVFDKVIRSLPPQPCPPPMPLVVKALRELPQSDVDEITAELDALRLSSAAAAAQAAVTSGAGLGFEASSLSLTTLAEERPSQAPTAFSPKQKEEAGRLASPRRAAAPGDSQATLSTPRGRGGSRGGLGRGGSGGRSQRGASHAGAADETVSGLELDDPPEGAASANGPAGSGGATPQALRRLVGGISFNRSGNAWVASWVTRADFKHRYKYFKTADFGYEQARLLAIRFRQHKLLSGDAVVE…	0	89.104	12	25	36	25	2503	256.5	8.16	79.94	25	0.956	0.965	0.951	1.032	0.987	0.996	0.981	0.991	0.981	0.984	-0.06	-0.05	-0.07	0.04	-0.02	-0.01	-0.03	-0.01	-0.03	-0.02	0.77358	0.781562	0.765387	0.793796	0.707963	0.624989	0.700036	0.00185179	0.334248	0.676169	0.902748	0.917043	0.927729
FALSE	High	Master Protein	TGGT1_239820-t26_1-p1	transcript=TGGT1_239820-t26_1 | gene=TGGT1_239820 | organism=Toxoplasma_gondii_GT1 | gene_product=D-3-phosphoglycerate dehydrogenase [Source:UniProtKB/TrEMBL;Acc:A0A125YMY8] | transcript_product=D-3-phosphoglycerate dehydrogenase | location=TGGT1_chrVI:931789-940557(-) | protein_length=604 | sequence_SO=chromosome | SO=protein_coding_gene | is_pseudo=false	MAEATAQKRQKKHGRFRVLVCDPIDQAGMDILSSFADVDTKLKLSEEELCRVVGNYDGLMVRSGTTVTEKIIKHGQKLKIIGRAGVGVDNVCVDAATAQGIFVVNSPNGNTMAAAELTLGLMMALARKIPQADASVSRGEWTRSKFMGRQLNQKTIGIIGLGQVGTHVARVCTALGMEVLAYDPFINEEKAKAVGCRNVALETLLASSDFITLHVPLLDKTRHLINADKLKLIKKDACIINASRGGVIDEKAVAEALMANELAGAALDVFEEEKEFSKDNPLIQAKANGRNIILTPHIGASTLEAQHNVAVDVALQFREALLGGLPQSAVNLQCVRSQQLVSLVHLAEILGRLCSKLVDEPVETLHLKIRGSVDSANADVLLLSAAQGVLRTRCDHIVN…	0	89.07	34	19	61	19	604	65.2	6.99	177.32	19	1.053	1.059	1.039	0.955	1.006	1.011	0.993	1.022	1.001	1.026	0.07	0.08	0.06	-0.07	0.01	0.02	-0.01	0.03	0	0.04	0.418055	0.455761	0.597617	0.460096	0.0701973	0.437322	0.660502	0.0988957	0.968003	0.0987307	0.889498	0.902448	0.922119
FALSE	High	Master Protein	TGGT1_205040-t26_1-p1	transcript=TGGT1_205040-t26_1 | gene=TGGT1_205040 | organism=Toxoplasma_gondii_GT1 | gene_product=PGAP1 family protein [Source:UniProtKB/TrEMBL;Acc:S7W9R1] | transcript_product=PGAP1 family protein | location=TGGT1_chrVIIa:1568087-1575644(-) | protein_length=2110 | sequence_SO=chromosome | SO=protein_coding_gene | is_pseudo=false	MGALETYSSRPHSGDRSNLNGSNSQRRRSRGGLPLGTKPGRRSESPENKGNDKDNGSEGSWLAAATQAVTEVDSRNTQETCETRMLHPARAFPPKHRRVEAIETTLGAAKGESAALECEKQGLSAPVRRAVLWLRRHAKNAAFYLAIFAFSFILLSGLSPYYHGNHTRNLVRASGRFPRVPLEKNSHYALLFVKLTADDPAPDFSRPFNLPRRNRPQKMVESSKNDERTQEDEDEADVEYYPMLVVPGHRGDWRQVLPLGKTLHDIALKRNNPPASVGNEIDPDEAMEHHIFGTGYGENQQGDGLESRTTNNQNGRKVKVVYHLYVVDFHREPSAFHPTILDKQADFVIQCLEKLQSLYVPARDRGASSNLGPPLTLVGHSLGGTVVLRVLSKRRRLRS…	0	88.753	14	23	31	23	2110	228.2	7.56	85.87	23	0.922	0.923	0.915	1.09	1.004	1.006	0.997	1.023	1.003	1.021	-0.12	-0.12	-0.13	0.12	0.01	0.01	0	0.03	0	0.03	0.559088	0.497085	0.425081	0.546194	0.164423	0.823264	0.945531	0.606758	0.918198	0.28977	0.889498	0.902448	0.922119
FALSE	High	Master Protein	TGGT1_223840-t26_1-p1	transcript=TGGT1_223840-t26_1 | gene=TGGT1_223840 | organism=Toxoplasma_gondii_GT1 | gene_product=Putative ATP-citrate lyase [Source:UniProtKB/TrEMBL;Acc:S7UW82] | transcript_product=putative ATP-citrate lyase | location=TGGT1_chrX:3444517-3448806(-) | protein_length=1281 | sequence_SO=chromosome | SO=protein_coding_gene | is_pseudo=false	MALSIREADAKRLLWTPVSHPTPATGATPETGQRSACNGVSGAKAAPLDEPCSVLRGVCVAVNSATDLTELPNDHPWLLTSRLTVKPDVLLKRRGKSGLVKLDLSWPEAQKELRALMGTQFTTQGLTGTLDHFIVEPFFPHDEATNEFYVAIRTLREGDEVLFSPRGGVDVGNVDEHARRVLIPIACDEARASQAAGAKTNGMADASASEGDATKDARKACTQPLALEATRKYGIECRLTQEELEALVAPLVTDVATDAKKAMPAFLAQLYRQFCEMHFAFLEINPFCFDVATQTFVILDCAAKLDHTAEFLCDKKWGHVSFPSPFGRRFTEEERYIRELDSKTGASLKLTVLNPKGRIWTLIAGGGASVVYADTVCDLGFGDELCNYGEYSGAPSEVT…	0	88.735	21	21	39	21	1281	139.7	6.57	106.86	21	1.047	1.066	1.014	1.037	1.086	1.106	1.052	1.006	0.986	0.99	0.07	0.09	0.02	0.05	0.12	0.15	0.07	0.01	-0.02	-0.01	0.515991	0.418905	0.873804	0.785102	0.376713	0.314452	0.38624	0.531028	0.862727	0.535012	0.889498	0.902448	0.955263
FALSE	High	Master Protein	TGGT1_211690-t26_1-p1	transcript=TGGT1_211690-t26_1 | gene=TGGT1_211690 | organism=Toxoplasma_gondii_GT1 | gene_product=DRBM domain-containing protein [Source:UniProtKB/TrEMBL;Acc:S7UKM4] | transcript_product=AAA family protein | location=TGGT1_chrIV:1531700-1551811(-) | protein_length=1538 | sequence_SO=chromosome | SO=protein_coding_gene | is_pseudo=false	MSPPTNCLAVQLPLSSPSSASSSFFVAAPLRRGAIQRSASASQRPRFVSVLYRNAKLRASSFDARVKPLRLPLSLRSVLNLSSPDLARPASLFALSSAASCASQSRRLPHSPLSAGRWLSGPGFLASPLSVGKRLCSRLLGAAPSELFRGNMSGRGFAHGGSLDGGGSREPRSAALASADAQRAPASARRGRNFVAGRRGSQGFLKEGTAAFASLRNGPAASASPQASQQLTHSAGTPSLPRAQAATPHPAASSPLCASPPAASPSPAAEESVSLEKLFGGMGHPQFNKHIVDDENILHFYGIRQAVLRPVVHEDCSRGASAAHASSPPANSRRGKEPSQNQFFKATLSWTISGKRKIQTEGVGRSKKDAKKDAVKTLLSQLGPVTLHEYEQVTRCLFS…	0	88.696	19	25	38	25	1538	167.1	8.87	87.95	25	0.893	0.906	0.939	1.139	1.018	1.032	1.069	1.029	1.032	0.996	-0.16	-0.14	-0.09	0.19	0.03	0.05	0.1	0.04	0.05	-0.01	0.419652	0.423912	0.440469	0.315054	0.488385	0.148801	0.166061	0.484868	0.13874	0.860136	0.889498	0.902448	0.922119
[truncated: 5,124 more rows]
[truncated: 171 more columns]
