# Supplementary material for: Analysis of CDPK1 targets identifies a trafficking adaptor complex that regulates microneme exocytosis in Toxoplasma
Source: eLife. 2023 Nov 7;12:RP85654. doi: 10.7554/eLife.85654 (PMC10629828; doi:10.7554/eLife.85654)
Supplement: Supplementary file 5. [file elife-85654-supp5.xlsx]

## Sheet: 5_IPs_CDPK1
Visible	Star	Protein Name	Accession Number	Molecular Weight	Protein Group Score	Identified Peptide Count	Exclusivity	Abundances_MUT	Abundances_TIR1	Abundances_WT	pvalue_adj_WTvsTIR1	pvalue_adj_MUTvsTIR1	pvalue_adj_WTvsMUT
TRUE	Empty	TGGT1_306060-t26_1-p1 | transcript=TGGT1_306060-t26_1 | gene=TGGT1_306060 | organism=Toxoplasma_gondii_GT1 | gene_product=rhoptry neck protein RON8 | transcript_product=rhoptry neck protein RON8 | location=TGGT1_chrIX:5560917-5575203(-) | protein_length=2980 | sequence_SO=chromosome | SO=protein_coding | is_pseudo=false	TGGT1_306060-t26_1-p1	329 kDa	0.999933	68	1	44001830	51940440	42351310	0.17	0.027	0.73
TRUE	Empty	TGGT1_223920-t26_1-p1 | transcript=TGGT1_223920-t26_1 | gene=TGGT1_223920 | organism=Toxoplasma_gondii_GT1 | gene_product=rhoptry neck protein RON3 | transcript_product=rhoptry neck protein RON3 | location=TGGT1_chrX:3357300-3367973(+) | protein_length=1958 | sequence_SO=chromosome | SO=protein_coding | is_pseudo=false	TGGT1_223920-t26_1-p1	223 kDa	1	57	1	93839850	99330300	78283820	0.011	0.62	0.21
TRUE	Empty	TGGT1_292020-t26_1-p1 | transcript=TGGT1_292020-t26_1 | gene=TGGT1_292020 | organism=Toxoplasma_gondii_GT1 | gene_product=GCC2 and GCC3 domain-containing protein | transcript_product=GCC2 and GCC3 domain-containing protein | location=TGGT1_chrIX:4285927-4313392(+) | protein_length=7440 | sequence_SO=chromosome | SO=protein_coding | is_pseudo=false	TGGT1_292020-t26_1-p1	800 kDa	0.999942	55	1	9223854	8850195	7713862	0.19	0.83	0.42
TRUE	Empty	TGGT1_223390-t26_1-p1 | transcript=TGGT1_223390-t26_1 | gene=TGGT1_223390 | organism=Toxoplasma_gondii_GT1 | gene_product=putative activating signal cointegrator 1 complex subunit 3 family 1 ASCC3L1 | transcript_product=putative activating signal cointegrator 1 complex subunit 3 family 1 ASCC3L1 | location=TGGT1_chrX:3771178-3788152(+) | protein_length=2207 | sequence_SO=chromosome | SO=protein_c…	TGGT1_223390-t26_1-p1	248 kDa	0.99998	54	1	21584610	19847930	25747110	0.083	0.57	0.21
TRUE	Empty	TGGT1_221320-t26_1-p1 | transcript=TGGT1_221320-t26_1 | gene=TGGT1_221320 | organism=Toxoplasma_gondii_GT1 | gene_product=acetyl-CoA carboxylase ACC1 | transcript_product=acetyl-CoA carboxylase ACC1 | location=TGGT1_chrII:218988-235059(-) | protein_length=2614 | sequence_SO=chromosome | SO=protein_coding | is_pseudo=false	TGGT1_221320-t26_1-p1	288 kDa	0.999962	52	1	22522680	25281010	23967640	0.67	0.55	0.77
TRUE	Empty	TGGT1_297745-t26_1-p1 | transcript=TGGT1_297745-t26_1 | gene=TGGT1_297745 | organism=Toxoplasma_gondii_GT1 | gene_product=hypothetical protein | transcript_product=hypothetical protein | location=TGGT1_chrII:1939393-1956115(-) | protein_length=3869 | sequence_SO=chromosome | SO=protein_coding | is_pseudo=false	TGGT1_297745-t26_1-p1	414 kDa	0.9999	52	1	44471400	40218370	47320340	0.21	0.5	0.72
TRUE	Empty	TGGT1_278870-t26_1-p1 | transcript=TGGT1_278870-t26_1 | gene=TGGT1_278870 | organism=Toxoplasma_gondii_GT1 | gene_product=myosin F | transcript_product=myosin F | location=TGGT1_chrXII:5709485-5725053(+) | protein_length=1953 | sequence_SO=chromosome | SO=protein_coding | is_pseudo=false	TGGT1_278870-t26_1-p1	216 kDa	0.999972	51	1	46570440	50158890	48118070	0.81	0.014	0.85
TRUE	Empty	TGGT1_311470-t26_1-p1 | transcript=TGGT1_311470-t26_1 | gene=TGGT1_311470 | organism=Toxoplasma_gondii_GT1 | gene_product=rhoptry neck protein RON5 | transcript_product=rhoptry neck protein RON5 | location=TGGT1_chrXI:2047692-2067010(-) | protein_length=1699 | sequence_SO=chromosome | SO=protein_coding | is_pseudo=false	TGGT1_311470-t26_1-p1	187 kDa	0.999988	46	1	70833670	83167630	60937540	0.018	0.26	0.28
TRUE	Empty	TGGT1_318440-t26_1-p1 | transcript=TGGT1_318440-t26_1 | gene=TGGT1_318440 | organism=Toxoplasma_gondii_GT1 | gene_product=helicase associated domain (ha2) protein | transcript_product=helicase associated domain (ha2) protein | location=TGGT1_chrIV:1264045-1277404(-) | protein_length=2234 | sequence_SO=chromosome | SO=protein_coding | is_pseudo=false	TGGT1_318440-t26_1-p1	237 kDa	0.999988	45	1	16334870	18889450	15835320	0.45	0.38	0.9
TRUE	Empty	TGGT1_244560-t26_1-p1 | transcript=TGGT1_244560-t26_1 | gene=TGGT1_244560 | organism=Toxoplasma_gondii_GT1 | gene_product=putative heat shock protein 90 | transcript_product=putative heat shock protein 90 | location=TGGT1_chrVI:3273039-3276701(+) | protein_length=853 | sequence_SO=chromosome | SO=protein_coding | is_pseudo=false	TGGT1_244560-t26_1-p1	98 kDa	0.99989	44	0.98	230912400	250603900	251281700	0.97	0.8	0.8
TRUE	Empty	TGGT1_308890-t26_1-p1 | transcript=TGGT1_308890-t26_1 | gene=TGGT1_308890 | organism=Toxoplasma_gondii_GT1 | gene_product=transcription elongation factor SPT6 | transcript_product=transcription elongation factor SPT6 | location=TGGT1_chrXI:296965-314183(+) | protein_length=3132 | sequence_SO=chromosome | SO=protein_coding | is_pseudo=false	TGGT1_308890-t26_1-p1	350 kDa	0.999917	43	1	46973310	39332220	53039200	0.1	0.5	0.6
TRUE	Empty	TGGT1_254570-t26_1-p1 | transcript=TGGT1_254570-t26_1 | gene=TGGT1_254570 | organism=Toxoplasma_gondii_GT1 | gene_product=hypothetical protein | transcript_product=hypothetical protein | location=TGGT1_chrIII:1812321-1825184(-) | protein_length=1997 | sequence_SO=chromosome | SO=protein_coding | is_pseudo=false	TGGT1_254570-t26_1-p1	224 kDa	0.999944	43	1	10733140	10184290	13415430	0.42	0.91	0.59
TRUE	Empty	TGGT1_290950-t26_1-p1 | transcript=TGGT1_290950-t26_1 | gene=TGGT1_290950 | organism=Toxoplasma_gondii_GT1 | gene_product=putative clathrin heavy chain | transcript_product=putative clathrin heavy chain | location=TGGT1_chrIX:3770246-3782423(-) | protein_length=1731 | sequence_SO=chromosome | SO=protein_coding | is_pseudo=false	TGGT1_290950-t26_1-p1	194 kDa	0.99975	43	1	24359220	29252290	22718320	0.012	0.16	0.51
TRUE	Empty	TGGT1_235470-t26_1-p1 | transcript=TGGT1_235470-t26_1 | gene=TGGT1_235470 | organism=Toxoplasma_gondii_GT1 | gene_product=myosin A | transcript_product=myosin A | location=TGGT1_chrX:4773284-4778894(+) | protein_length=831 | sequence_SO=chromosome | SO=protein_coding | is_pseudo=false	TGGT1_235470-t26_1-p1	93 kDa	0.999976	37	0.97	143363900	148315100	115125800	0.17	0.63	0.24
TRUE	Empty	TGGT1_226660-t26_1-p1 | transcript=TGGT1_226660-t26_1 | gene=TGGT1_226660 | organism=Toxoplasma_gondii_GT1 | gene_product=hypothetical protein | transcript_product=hypothetical protein | location=TGGT1_chrX:1361506-1380909(+) | protein_length=3736 | sequence_SO=chromosome | SO=protein_coding | is_pseudo=false	TGGT1_226660-t26_1-p1	390 kDa	0.99994	40	1	11762300	11603720	12485210	0.79	0.93	0.85
TRUE	Empty	TGGT1_269290-t26_1-p1 | transcript=TGGT1_269290-t26_1 | gene=TGGT1_269290 | organism=Toxoplasma_gondii_GT1 | gene_product=hypothetical protein | transcript_product=hypothetical protein | location=TGGT1_chrVIII:5927256-5944753(-) | protein_length=4668 | sequence_SO=chromosome | SO=protein_coding | is_pseudo=false	TGGT1_269290-t26_1-p1	503 kDa	0.999846	40	1	12036190	8954191	9897073	0.23	0.19	0.36
TRUE	Empty	TGGT1_228170-t26_1-p1 | transcript=TGGT1_228170-t26_1 | gene=TGGT1_228170 | organism=Toxoplasma_gondii_GT1 | gene_product=inner membrane complex protein IMC2A | transcript_product=inner membrane complex protein IMC2A | location=TGGT1_chrX:431147-436956(-) | protein_length=1596 | sequence_SO=chromosome | SO=protein_coding | is_pseudo=false	TGGT1_228170-t26_1-p1	182 kDa	0.999632	40	1	25272990	27517600	22553070	0.062	0.27	0.041
TRUE	Empty	TGGT1_313430-t26_1-p1 | transcript=TGGT1_313430-t26_1 | gene=TGGT1_313430 | organism=Toxoplasma_gondii_GT1 | gene_product=hypothetical protein | transcript_product=hypothetical protein | location=TGGT1_chrXI:3334289-3356350(+) | protein_length=5639 | sequence_SO=chromosome | SO=protein_coding | is_pseudo=false	TGGT1_313430-t26_1-p1	593 kDa	0.999727	39	1	9358304	8362499	10452360	0.06	0.49	0.46
TRUE	Empty	TGGT1_231970-t26_1-p1 | transcript=TGGT1_231970-t26_1 | gene=TGGT1_231970 | organism=Toxoplasma_gondii_GT1 | gene_product=pre-mRNA processing splicing factor PRP8 | transcript_product=pre-mRNA processing splicing factor PRP8 | location=TGGT1_chrVIII:1677402-1691932(+) | protein_length=2538 | sequence_SO=chromosome | SO=protein_coding | is_pseudo=false	TGGT1_231970-t26_1-p1	292 kDa	0.999853	38	1	16300990	20247940	19098100	0.63	0.43	0.57
TRUE	Empty	TGGT1_280560-t26_1-p1 | transcript=TGGT1_280560-t26_1 | gene=TGGT1_280560 | organism=Toxoplasma_gondii_GT1 | gene_product=selenide, water dikinase | transcript_product=selenide, water dikinase | location=TGGT1_chrVIIa:275729-285116(-) | protein_length=1298 | sequence_SO=chromosome | SO=protein_coding | is_pseudo=false	TGGT1_280560-t26_1-p1	138 kDa	0.999748	37	1	118934500	120839400	132866900	0.78	0.93	0.7
TRUE	Empty	TGGT1_311720-t26_1-p1 | transcript=TGGT1_311720-t26_1 | gene=TGGT1_311720 | organism=Toxoplasma_gondii_GT1 | gene_product=chaperonin protein BiP | transcript_product=chaperonin protein BiP | location=TGGT1_chrXI:2188121-2191497(-) | protein_length=668 | sequence_SO=chromosome | SO=protein_coding | is_pseudo=false	TGGT1_311720-t26_1-p1	73 kDa	0.999997	35	0.94	326955200	329704300	346463600	0.59	0.98	0.86
TRUE	Empty	TGGT1_264660-t26_1-p1 | transcript=TGGT1_264660-t26_1 | gene=TGGT1_264660 | organism=Toxoplasma_gondii_GT1 | gene_product=SAG-related sequence SRS44 | transcript_product=SAG-related sequence SRS44 | location=TGGT1_chrIX:1955976-1963333(+) | protein_length=2359 | sequence_SO=chromosome | SO=protein_coding | is_pseudo=false	TGGT1_264660-t26_1-p1	252 kDa	0.999986	36	1	61261830	21855870	38964630	0.29	0.04	0.4
TRUE	Empty	TGGT1_286580-t26_1-p1 | transcript=TGGT1_286580-t26_1 | gene=TGGT1_286580 | organism=Toxoplasma_gondii_GT1 | gene_product=hypothetical protein | transcript_product=hypothetical protein | location=TGGT1_chrV:1631039-1633906(-) | protein_length=955 | sequence_SO=chromosome | SO=protein_coding | is_pseudo=false	TGGT1_286580-t26_1-p1	107 kDa	0.999999	34	1	29343390	32866340	23270700	0.14	0.37	0.28
TRUE	Empty	TGGT1_216620-t26_1-p1 | transcript=TGGT1_216620-t26_1 | gene=TGGT1_216620 | organism=Toxoplasma_gondii_GT1 | gene_product=EF hand domain-containing protein | transcript_product=EF hand domain-containing protein | location=TGGT1_chrXI:5927325-5957645(+) | protein_length=3700 | sequence_SO=chromosome | SO=protein_coding | is_pseudo=false	TGGT1_216620-t26_1-p1	412 kDa	0.999955	35	1	4155212	4998044	3371421	0.039	0.35	0.33
TRUE	Empty	TGGT1_311230-t26_1-p1 | transcript=TGGT1_311230-t26_1 | gene=TGGT1_311230 | organism=Toxoplasma_gondii_GT1 | gene_product=hypothetical protein | transcript_product=hypothetical protein | location=TGGT1_chrXI:1844321-1862670(+) | protein_length=4603 | sequence_SO=chromosome | SO=protein_coding | is_pseudo=false	TGGT1_311230-t26_1-p1	495 kDa	0.999928	35	1	12909080	14386140	10290110	0.074	0.47	0.24
TRUE	Empty	TGGT1_216670-t26_1-p1 | transcript=TGGT1_216670-t26_1 | gene=TGGT1_216670 | organism=Toxoplasma_gondii_GT1 | gene_product=FUSE-binding protein 2 / KH-type splicing regulatory protein | transcript_product=FUSE-binding protein 2 / KH-type splicing regulatory protein | location=TGGT1_chrXI:5891708-5895741(-) | protein_length=941 | sequence_SO=chromosome | SO=protein_coding | is_pseudo=false	TGGT1_216670-t26_1-p1	100 kDa	0.999815	35	1	28058950	31189510	27878360	0.78	0.76	0.99
TRUE	Empty	TGGT1_226730-t26_1-p1 | transcript=TGGT1_226730-t26_1 | gene=TGGT1_226730 | organism=Toxoplasma_gondii_GT1 | gene_product=aconitate hydratase ACN/IRP | transcript_product=aconitate hydratase ACN/IRP | location=TGGT1_chrX:1308814-1316049(-) | protein_length=1055 | sequence_SO=chromosome | SO=protein_coding | is_pseudo=false	TGGT1_226730-t26_1-p1	115 kDa	0.999947	33	1	25264500	32730360	25202570	0.14	0.13	0.99
TRUE	Empty	TGGT1_258970-t26_1-p1 | transcript=TGGT1_258970-t26_1 | gene=TGGT1_258970 | organism=Toxoplasma_gondii_GT1 | gene_product=hypothetical protein | transcript_product=hypothetical protein | location=TGGT1_chrVIIb:3019435-3037803(-) | protein_length=3039 | sequence_SO=chromosome | SO=protein_coding | is_pseudo=false	TGGT1_258970-t26_1-p1	327 kDa	0.999837	34	1	30293500	20197820	29244320	0.14	0.00023	0.84
TRUE	Empty	TGGT1_269885A-t26_1-p1 | transcript=TGGT1_269885A-t26_1 | gene=TGGT1_269885A | organism=Toxoplasma_gondii_GT1 | gene_product=rhoptry metalloprotease toxolysin TLN1 | transcript_product=rhoptry metalloprotease toxolysin TLN1 | location=TGGT1_chrVIII:5561686-5568242(+) | protein_length=1291 | sequence_SO=chromosome | SO=protein_coding | is_pseudo=false	TGGT1_269885A-t26_1-p1	142 kDa	0.999953	33	0.79	19935750	21995160	18048280	0.049	0.44	0.4
TRUE	Empty	TGGT1_305340-t26_1-p1 | transcript=TGGT1_305340-t26_1 | gene=TGGT1_305340 | organism=Toxoplasma_gondii_GT1 | gene_product=corepressor complex CRC230 | transcript_product=corepressor complex CRC230 | location=TGGT1_chrIX:5155746-5169422(+) | protein_length=1916 | sequence_SO=chromosome | SO=protein_coding | is_pseudo=false	TGGT1_305340-t26_1-p1	207 kDa	0.999666	33	1	10774100	9077890	10781860	0.48	0.6	1
TRUE	Empty	TGGT1_228120-t26_1-p1 | transcript=TGGT1_228120-t26_1 | gene=TGGT1_228120 | organism=Toxoplasma_gondii_GT1 | gene_product=hypothetical protein | transcript_product=hypothetical protein | location=TGGT1_chrX:469350-486422(+) | protein_length=3946 | sequence_SO=chromosome | SO=protein_coding | is_pseudo=false	TGGT1_228120-t26_1-p1	418 kDa	0.999997	31	1	3960206	3498058	3958245	0.65	0.83	1
TRUE	Empty	TGGT1_211680-t26_1-p1 | transcript=TGGT1_211680-t26_1 | gene=TGGT1_211680 | organism=Toxoplasma_gondii_GT1 | gene_product=protein disulfide isomerase | transcript_product=protein disulfide isomerase | location=TGGT1_chrIV:1556190-1558014(+) | protein_length=471 | sequence_SO=chromosome | SO=protein_coding | is_pseudo=false	TGGT1_211680-t26_1-p1	53 kDa	0.99999	30	0.97	363130200	392469800	431467200	0.44	0.85	0.68
TRUE	Empty	TGGT1_217680-t26_1-p1 | transcript=TGGT1_217680-t26_1 | gene=TGGT1_217680 | organism=Toxoplasma_gondii_GT1 | gene_product=hypothetical protein | transcript_product=hypothetical protein | location=TGGT1_chrXII:1930956-1942802(-) | protein_length=2213 | sequence_SO=chromosome | SO=protein_coding | is_pseudo=false	TGGT1_217680-t26_1-p1	243 kDa	0.999978	31	1	6701660	7350757	5744000	0.15	0.59	0.26
TRUE	Empty	TGGT1_273090-t26_1-p1 | transcript=TGGT1_273090-t26_1 | gene=TGGT1_273090 | organism=Toxoplasma_gondii_GT1 | gene_product=cell division protein CDC48CY | transcript_product=cell division protein CDC48CY | location=TGGT1_chrVIII:3661986-3671254(-) | protein_length=811 | sequence_SO=chromosome | SO=protein_coding | is_pseudo=false	TGGT1_273090-t26_1-p1	89 kDa	0.999753	29	0.97	41509440	41934640	39191180	0.35	0.93	0.56
TRUE	Empty	TGGT1_273560-t26_1-p1 | transcript=TGGT1_273560-t26_1 | gene=TGGT1_273560 | organism=Toxoplasma_gondii_GT1 | gene_product=putative kinesin heavy chain | transcript_product=putative kinesin heavy chain | location=TGGT1_chrVIII:3381230-3400326(-) | protein_length=1641 | sequence_SO=chromosome | SO=protein_coding | is_pseudo=false	TGGT1_273560-t26_1-p1	181 kDa	0.999917	30	1	6939202	8574973	6599455	0.11	0.17	0.75
TRUE	Empty	TGGT1_226830-t26_1-p1 | transcript=TGGT1_226830-t26_1 | gene=TGGT1_226830 | organism=Toxoplasma_gondii_GT1 | gene_product=DnaK family protein | transcript_product=DnaK family protein | location=TGGT1_chrX:1215623-1218481(-) | protein_length=952 | sequence_SO=chromosome | SO=protein_coding | is_pseudo=false	TGGT1_226830-t26_1-p1	105 kDa	0.999909	30	1	47420360	49198920	51015000	0.69	0.9	0.81
TRUE	Empty	TGGT1_215910-t26_1-p1 | transcript=TGGT1_215910-t26_1 | gene=TGGT1_215910 | organism=Toxoplasma_gondii_GT1 | gene_product=hypothetical protein | transcript_product=hypothetical protein | location=TGGT1_chrXI:6452010-6464550(+) | protein_length=3029 | sequence_SO=chromosome | SO=protein_coding | is_pseudo=false	TGGT1_215910-t26_1-p1	328 kDa	0.999745	30	1	5859112	4697517	5789079	0.015	0.2	0.93
TRUE	Empty	TGGT1_214600-t26_1-p1 | transcript=TGGT1_214600-t26_1 | gene=TGGT1_214600 | organism=Toxoplasma_gondii_GT1 | gene_product=hypothetical protein | transcript_product=hypothetical protein | location=TGGT1_chrX:6286080-6303782(-) | protein_length=4050 | sequence_SO=chromosome | SO=protein_coding | is_pseudo=false	TGGT1_214600-t26_1-p1	433 kDa	0.999702	30	1	9826422	7140291	8422385	0.44	0.024	0.45
TRUE	Empty	TGGT1_286420A-t26_1-p1 | transcript=TGGT1_286420A-t26_1 | gene=TGGT1_286420A | organism=Toxoplasma_gondii_GT1 | gene_product=putative elongation factor 1-alpha (EF-1-ALPHA) | transcript_product=putative elongation factor 1-alpha (EF-1-ALPHA) | location=TGGT1_chrV:1692242-1694172(-) | protein_length=448 | sequence_SO=chromosome | SO=protein_coding | is_pseudo=false	TGGT1_286420A-t26_1-p1	50 kDa	0.999971	23	1	101047400	100848100	118957700	0.32	0.99	0.18
TRUE	Empty	TGGT1_218960-t26_1-p1 | transcript=TGGT1_218960-t26_1 | gene=TGGT1_218960 | organism=Toxoplasma_gondii_GT1 | gene_product=AP2 domain transcription factor AP2XII-1 | transcript_product=AP2 domain transcription factor AP2XII-1 | location=TGGT1_chrXII:1115397-1126277(-) | protein_length=2283 | sequence_SO=chromosome | SO=protein_coding | is_pseudo=false	TGGT1_218960-t26_1-p1	248 kDa	0.998546	29	1	8009167	6955549	6795031	0.96	0.63	0.78
TRUE	Empty	TGGT1_269180-t26_1-p1 | transcript=TGGT1_269180-t26_1 | gene=TGGT1_269180 | organism=Toxoplasma_gondii_GT1 | gene_product=MIF4G domain-containing protein | transcript_product=MIF4G domain-containing protein | location=TGGT1_chrVIII:6008955-6021323(-) | protein_length=2668 | sequence_SO=chromosome | SO=protein_coding | is_pseudo=false	TGGT1_269180-t26_1-p1	273 kDa	0.999999	27	1	4919384	5358521	6270673	0.45	0.49	0.34
TRUE	Empty	TGGT1_279420-t26_1-p1 | transcript=TGGT1_279420-t26_1 | gene=TGGT1_279420 | organism=Toxoplasma_gondii_GT1 | gene_product=hypothetical protein | transcript_product=hypothetical protein | location=TGGT1_chrIX:26421-30410(+) | protein_length=1329 | sequence_SO=chromosome | SO=protein_coding | is_pseudo=false	TGGT1_279420-t26_1-p1	145 kDa	0.999989	26	1	18454640	20786370	14229860	0.016	0.27	0.097
TRUE	Empty	TGGT1_230960-t26_1-p1 | transcript=TGGT1_230960-t26_1 | gene=TGGT1_230960 | organism=Toxoplasma_gondii_GT1 | gene_product=putative splicing factor 3b, subunit 3 | transcript_product=putative splicing factor 3b, subunit 3 | location=TGGT1_chrVIII:1132596-1143754(-) | protein_length=1233 | sequence_SO=chromosome | SO=protein_coding | is_pseudo=false	TGGT1_230960-t26_1-p1	136 kDa	0.999988	27	1	26435550	26075700	25586310	0.93	0.82	0.88
TRUE	Empty	TGGT1_253370-t26_1-p1 | transcript=TGGT1_253370-t26_1 | gene=TGGT1_253370 | organism=Toxoplasma_gondii_GT1 | gene_product=hypothetical protein | transcript_product=hypothetical protein | location=TGGT1_chrIII:861500-883749(+) | protein_length=1981 | sequence_SO=chromosome | SO=protein_coding | is_pseudo=false	TGGT1_253370-t26_1-p1	216 kDa	0.999945	27	1	3587638	4021687	3427458	0.48	0.41	0.8
TRUE	Empty	TGGT1_224460-t26_1-p1 | transcript=TGGT1_224460-t26_1 | gene=TGGT1_224460 | organism=Toxoplasma_gondii_GT1 | gene_product=putative aminopeptidase n | transcript_product=putative aminopeptidase n | location=TGGT1_chrX:2956872-2964821(+) | protein_length=970 | sequence_SO=chromosome | SO=protein_coding | is_pseudo=false	TGGT1_224460-t26_1-p1	109 kDa	0.999936	27	0.93	14371570	16049980	11508880	0.045	0.44	0.21
TRUE	Empty	TGGT1_208370-t26_1-p1 | transcript=TGGT1_208370-t26_1 | gene=TGGT1_208370 | organism=Toxoplasma_gondii_GT1 | gene_product=putative myosin heavy chain | transcript_product=putative myosin heavy chain | location=TGGT1_chrIb:652389-657163(+) | protein_length=1124 | sequence_SO=chromosome | SO=protein_coding | is_pseudo=false	TGGT1_208370-t26_1-p1	125 kDa	0.999922	27	1	8777403	8509144	9087653	0.9	0.81	0.95
TRUE	Empty	TGGT1_275650-t26_1-p1 | transcript=TGGT1_275650-t26_1 | gene=TGGT1_275650 | organism=Toxoplasma_gondii_GT1 | gene_product=hypothetical protein | transcript_product=hypothetical protein | location=TGGT1_chrIII:288290-290923(+) | protein_length=877 | sequence_SO=chromosome | SO=protein_coding | is_pseudo=false	TGGT1_275650-t26_1-p1	101 kDa	0.99987	27	1	19158650	20407990	20632660	0.67	0.31	0.26
TRUE	Empty	TGGT1_300100-t26_1-p1 | transcript=TGGT1_300100-t26_1 | gene=TGGT1_300100 | organism=Toxoplasma_gondii_GT1 | gene_product=rhoptry neck protein RON2 | transcript_product=rhoptry neck protein RON2 | location=TGGT1_chrXII:175560-186129(-) | protein_length=1479 | sequence_SO=chromosome | SO=protein_coding | is_pseudo=false	TGGT1_300100-t26_1-p1	166 kDa	0.999828	27	1	38667580	44486440	31417860	0.083	0.28	0.22
TRUE	Empty	TGGT1_275690-t26_1-p1 | transcript=TGGT1_275690-t26_1 | gene=TGGT1_275690 | organism=Toxoplasma_gondii_GT1 | gene_product=putative ClpB | transcript_product=putative ClpB | location=TGGT1_chrIII:255659-267189(+) | protein_length=1022 | sequence_SO=chromosome | SO=protein_coding | is_pseudo=false	TGGT1_275690-t26_1-p1	115 kDa	0.999765	26	1	26235650	24640110	25022110	0.73	0.73	0.79
TRUE	Empty	TGGT1_304990-t26_1-p1 | transcript=TGGT1_304990-t26_1 | gene=TGGT1_304990 | organism=Toxoplasma_gondii_GT1 | gene_product=guanylate-binding protein, N-terminal domain-containing protein | transcript_product=guanylate-binding protein, N-terminal domain-containing protein | location=TGGT1_chrIX:4925765-4936769(+) | protein_length=1281 | sequence_SO=chromosome | SO=protein_coding | is_pseudo=false	TGGT1_304990-t26_1-p1	143 kDa	0.999725	27	1	15199770	10963990	15349100	0.35	0.26	0.98
TRUE	Empty	TGGT1_310900-t26_1-p1 | transcript=TGGT1_310900-t26_1 | gene=TGGT1_310900 | organism=Toxoplasma_gondii_GT1 | gene_product=AP2 domain transcription factor AP2XI-2 | transcript_product=AP2 domain transcription factor AP2XI-2 | location=TGGT1_chrXI:1609168-1617013(-) | protein_length=2243 | sequence_SO=chromosome | SO=protein_coding | is_pseudo=false	TGGT1_310900-t26_1-p1	233 kDa	0.999645	27	1	7484243	6816238	8346548	0.52	0.86	0.85
TRUE	Empty	TGGT1_250820-t26_1-p1 | transcript=TGGT1_250820-t26_1 | gene=TGGT1_250820 | organism=Toxoplasma_gondii_GT1 | gene_product=hypothetical protein | transcript_product=hypothetical protein | location=TGGT1_chrXII:5170586-5175102(+) | protein_length=1156 | sequence_SO=chromosome | SO=protein_coding | is_pseudo=false	TGGT1_250820-t26_1-p1	121 kDa	0.999548	26	1	9640285	10614380	8486080	0.064	0.36	0.25
TRUE	Empty	TGGT1_291180-t26_1-p1 | transcript=TGGT1_291180-t26_1 | gene=TGGT1_291180 | organism=Toxoplasma_gondii_GT1 | gene_product=hypothetical protein | transcript_product=hypothetical protein | location=TGGT1_chrIX:4004987-4034538(-) | protein_length=5394 | sequence_SO=chromosome | SO=protein_coding | is_pseudo=false	TGGT1_291180-t26_1-p1	579 kDa	0.997051	27	1	3348762	2748830	3043425	0.72	0.48	0.77
TRUE	Empty	TGGT1_247550-t26_1-p1 | transcript=TGGT1_247550-t26_1 | gene=TGGT1_247550 | organism=Toxoplasma_gondii_GT1 | gene_product=heat shock protein HSP60 | transcript_product=heat shock protein HSP60 | location=TGGT1_chrXII:3342084-3346052(-) | protein_length=575 | sequence_SO=chromosome | SO=protein_coding | is_pseudo=false	TGGT1_247550-t26_1-p1	61 kDa	1	25	1	27198390	29623850	23085860	0.23	0.37	0.41
TRUE	Empty	TGGT1_227948-t26_1-p1 | transcript=TGGT1_227948-t26_1 | gene=TGGT1_227948 | organism=Toxoplasma_gondii_GT1 | gene_product=peptidase M16 inactive domain-containing protein | transcript_product=peptidase M16 inactive domain-containing protein | location=TGGT1_chrX:626225-636243(+) | protein_length=1306 | sequence_SO=chromosome | SO=protein_coding | is_pseudo=false	TGGT1_227948-t26_1-p1	143 kDa	0.999997	26	1	10399560	11855480	9501043	0.1	0.36	0.43
TRUE	Empty	TGGT1_310080-t26_1-p1 | transcript=TGGT1_310080-t26_1 | gene=TGGT1_310080 | organism=Toxoplasma_gondii_GT1 | gene_product=AMP-binding enzyme domain-containing protein | transcript_product=AMP-binding enzyme domain-containing protein | location=TGGT1_chrXI:1008086-1011664(-) | protein_length=789 | sequence_SO=chromosome | SO=protein_coding | is_pseudo=false	TGGT1_310080-t26_1-p1	88 kDa	0.999994	25	0.92	14165960	14167610	16821800	0.45	1	0.46
TRUE	Empty	TGGT1_311030-t26_1-p1 | transcript=TGGT1_311030-t26_1 | gene=TGGT1_311030 | organism=Toxoplasma_gondii_GT1 | gene_product=hypothetical protein | transcript_product=hypothetical protein | location=TGGT1_chrXI:1692933-1708438(-) | protein_length=3738 | sequence_SO=chromosome | SO=protein_coding | is_pseudo=false	TGGT1_311030-t26_1-p1	403 kDa	0.998805	26	1	2419056	2418385	2712443	0.49	1	0.78
TRUE	Empty	TGGT1_310150-t26_1-p1 | transcript=TGGT1_310150-t26_1 | gene=TGGT1_310150 | organism=Toxoplasma_gondii_GT1 | gene_product=AMP-binding enzyme domain-containing protein | transcript_product=AMP-binding enzyme domain-containing protein | location=TGGT1_chrXI:1055873-1060273(-) | protein_length=866 | sequence_SO=chromosome | SO=protein_coding | is_pseudo=false	TGGT1_310150-t26_1-p1	96 kDa	0.999999	25	0.92	21218590	19748150	19402510	0.65	0.64	0.56
TRUE	Empty	TGGT1_236970-t26_1-p1 | transcript=TGGT1_236970-t26_1 | gene=TGGT1_236970 | organism=Toxoplasma_gondii_GT1 | gene_product=SWI2/SNF2-containing PHD finger protein | transcript_product=SWI2/SNF2-containing PHD finger protein | location=TGGT1_chrX:5508193-5518721(+) | protein_length=2556 | sequence_SO=chromosome | SO=protein_coding | is_pseudo=false	TGGT1_236970-t26_1-p1	278 kDa	0.999975	25	1	4919006	5345716	5120062	0.86	0.86	0.94
TRUE	Empty	TGGT1_255190-t26_1-p1 | transcript=TGGT1_255190-t26_1 | gene=TGGT1_255190 | organism=Toxoplasma_gondii_GT1 | gene_product=myosin C | transcript_product=myosin C | location=TGGT1_chrVIIb:4925758-4933694(+) | protein_length=1171 | sequence_SO=chromosome | SO=protein_coding | is_pseudo=false	TGGT1_255190-t26_1-p1	133 kDa	0.999946	25	1	23590800	25188800	20830510	0.087	0.47	0.3
TRUE	Empty	TGGT1_221670-t26_1-p1 | transcript=TGGT1_221670-t26_1 | gene=TGGT1_221670 | organism=Toxoplasma_gondii_GT1 | gene_product=transcriptional elongation factor FACT140 | transcript_product=transcriptional elongation factor FACT140 | location=TGGT1_chrII:521099-534404(-) | protein_length=1198 | sequence_SO=chromosome | SO=protein_coding | is_pseudo=false	TGGT1_221670-t26_1-p1	135 kDa	0.999909	25	1	15303230	15439300	17715950	0.48	0.97	0.39
TRUE	Empty	TGGT1_229010-t26_1-p1 | transcript=TGGT1_229010-t26_1 | gene=TGGT1_229010 | organism=Toxoplasma_gondii_GT1 | gene_product=rhoptry neck protein RON4 | transcript_product=rhoptry neck protein RON4 | location=TGGT1_chrVIII:18238-24970(+) | protein_length=984 | sequence_SO=chromosome | SO=protein_coding | is_pseudo=false	TGGT1_229010-t26_1-p1	107 kDa	0.999882	25	1	39538670	45260440	34793700	0.18	0.26	0.39
TRUE	Empty	TGGT1_278660-t26_1-p1 | transcript=TGGT1_278660-t26_1 | gene=TGGT1_278660 | organism=Toxoplasma_gondii_GT1 | gene_product=putative P-type ATPase4 | transcript_product=putative P-type ATPase4 | location=TGGT1_chrXII:5863040-5875230(+) | protein_length=1338 | sequence_SO=chromosome | SO=protein_coding | is_pseudo=false	TGGT1_278660-t26_1-p1	145 kDa	0.999837	24	1	49853180	50854830	58836220	0.15	0.86	0.16
TRUE	Empty	TGGT1_286230-t26_1-p1 | transcript=TGGT1_286230-t26_1 | gene=TGGT1_286230 | organism=Toxoplasma_gondii_GT1 | gene_product=hypothetical protein | transcript_product=hypothetical protein | location=TGGT1_chrV:1753645-1764533(-) | protein_length=2622 | sequence_SO=chromosome | SO=protein_coding | is_pseudo=false	TGGT1_286230-t26_1-p1	279 kDa	0.999648	25	1	7089343	6290140	7118920	0.27	0.47	0.98
TRUE	Empty	TGGT1_259640-t26_1-p1 | transcript=TGGT1_259640-t26_1 | gene=TGGT1_259640 | organism=Toxoplasma_gondii_GT1 | gene_product=nucleoporin autopeptidase | transcript_product=nucleoporin autopeptidase | location=TGGT1_chrVIIb:2709338-2721341(-) | protein_length=2894 | sequence_SO=chromosome | SO=protein_coding | is_pseudo=false	TGGT1_259640-t26_1-p1	302 kDa	0.999519	25	1	7633971	6718841	9033883	0.14	0.6	0.41
TRUE	Empty	TGGT1_206670-t26_1-p1 | transcript=TGGT1_206670-t26_1 | gene=TGGT1_206670 | organism=Toxoplasma_gondii_GT1 | gene_product=hypothetical protein | transcript_product=hypothetical protein | location=TGGT1_chrVIIa:705099-714174(-) | protein_length=2072 | sequence_SO=chromosome | SO=protein_coding | is_pseudo=false	TGGT1_206670-t26_1-p1	218 kDa	0.998591	25	1	4292676	5132219	7945273	0.43	0.85	0.47
TRUE	Empty	TGGT1_244200-t26_1-p1 | transcript=TGGT1_244200-t26_1 | gene=TGGT1_244200 | organism=Toxoplasma_gondii_GT1 | gene_product=putative 2-oxoglutarate dehydrogenase e1 component, mitochondrial precursor | transcript_product=putative 2-oxoglutarate dehydrogenase e1 component, mitochondrial precursor | location=TGGT1_chrVI:3022117-3029688(-) | protein_length=1116 | sequence_SO=chromosome | SO=protein_co…	TGGT1_244200-t26_1-p1	124 kDa	0.999977	24	1	12603620	13251310	9680707	0.13	0.61	0.22
TRUE	Empty	TGGT1_230940-t26_1-p1 | transcript=TGGT1_230940-t26_1 | gene=TGGT1_230940 | organism=Toxoplasma_gondii_GT1 | gene_product=hypothetical protein | transcript_product=hypothetical protein | location=TGGT1_chrVIII:1112065-1119747(+) | protein_length=1523 | sequence_SO=chromosome | SO=protein_coding | is_pseudo=false	TGGT1_230940-t26_1-p1	155 kDa	0.999931	24	1	19865980	20692730	23707540	0.074	0.21	0.052
TRUE	Empty	TGGT1_238040A-t26_1-p1 | transcript=TGGT1_238040A-t26_1 | gene=TGGT1_238040A | organism=Toxoplasma_gondii_GT1 | gene_product=protein disulfide-isomerase domain-containing protein | transcript_product=protein disulfide-isomerase domain-containing protein | location=TGGT1_chrVI:19741-27980(-) | protein_length=1139 | sequence_SO=chromosome | SO=protein_coding | is_pseudo=false	TGGT1_238040A-t26_1-p1	126 kDa	0.999822	24	0.83	12984900	12990690	14391460	0.038	1	0.51
TRUE	Empty	TGGT1_222300-t26_1-p1 | transcript=TGGT1_222300-t26_1 | gene=TGGT1_222300 | organism=Toxoplasma_gondii_GT1 | gene_product=hypothetical protein | transcript_product=hypothetical protein | location=TGGT1_chrII:997106-1002828(-) | protein_length=1468 | sequence_SO=chromosome | SO=protein_coding | is_pseudo=false	TGGT1_222300-t26_1-p1	159 kDa	0.999558	24	1	6064133	5783609	5866901	0.9	0.71	0.76
TRUE	Empty	TGGT1_308090-t26_1-p1 | transcript=TGGT1_308090-t26_1 | gene=TGGT1_308090 | organism=Toxoplasma_gondii_GT1 | gene_product=rhoptry protein ROP5 | transcript_product=rhoptry protein ROP5 | location=AAQM03000031:206-1855(-) | protein_length=549 | sequence_SO=contig | SO=protein_coding | is_pseudo=false	TGGT1_308090-t26_1-p1	61 kDa	0.999263	23	0.48	287958900	195576200	250378300	0.26	0.11	0.52
TRUE	Empty	TGGT1_243920-t26_1-p1 | transcript=TGGT1_243920-t26_1 | gene=TGGT1_243920 | organism=Toxoplasma_gondii_GT1 | gene_product=putative DNA replication licensing factor MCM5 | transcript_product=putative DNA replication licensing factor MCM5 | location=TGGT1_chrVI:2796800-2806044(+) | protein_length=794 | sequence_SO=chromosome | SO=protein_coding | is_pseudo=false	TGGT1_243920-t26_1-p1	88 kDa	0.999223	24	1	19702740	27943540	22487250	0.36	0.17	0.52
TRUE	Empty	TGGT1_314410-t26_1-p1 | transcript=TGGT1_314410-t26_1 | gene=TGGT1_314410 | organism=Toxoplasma_gondii_GT1 | gene_product=putative aquarius | transcript_product=putative aquarius | location=TGGT1_chrXI:4032614-4045800(+) | protein_length=2247 | sequence_SO=chromosome | SO=protein_coding | is_pseudo=false	TGGT1_314410-t26_1-p1	251 kDa	0.99903	24	1	2540703	2244928	2293846	0.88	0.046	0.49
TRUE	Empty	TGGT1_261950-t26_1-p1 | transcript=TGGT1_261950-t26_1 | gene=TGGT1_261950 | organism=Toxoplasma_gondii_GT1 | gene_product=ATP synthase beta subunit ATP-B | transcript_product=ATP synthase beta subunit ATP-B | location=TGGT1_chrVIIb:1457013-1460114(-) | protein_length=560 | sequence_SO=chromosome | SO=protein_coding | is_pseudo=false	TGGT1_261950-t26_1-p1	60 kDa	1	22	1	78137150	79132260	67320590	0.29	0.66	0.32
TRUE	Empty	TGGT1_205010-t26_1-p1 | transcript=TGGT1_205010-t26_1 | gene=TGGT1_205010 | organism=Toxoplasma_gondii_GT1 | gene_product=putative U2 small nuclear ribonucleoprotein family protein | transcript_product=putative U2 small nuclear ribonucleoprotein family protein | location=TGGT1_chrVIIa:1582142-1590578(-) | protein_length=1386 | sequence_SO=chromosome | SO=protein_coding | is_pseudo=false	TGGT1_205010-t26_1-p1	151 kDa	0.999997	23	1	15533620	14570920	15097080	0.82	0.44	0.86
TRUE	Empty	TGGT1_288360-t26_1-p1 | transcript=TGGT1_288360-t26_1 | gene=TGGT1_288360 | organism=Toxoplasma_gondii_GT1 | gene_product=tryptophanyl-tRNA synthetase (TrpRS2) | transcript_product=tryptophanyl-tRNA synthetase (TrpRS2) | location=TGGT1_chrIX:2284649-2289081(+) | protein_length=689 | sequence_SO=chromosome | SO=protein_coding | is_pseudo=false	TGGT1_288360-t26_1-p1	77 kDa	0.999988	23	1	7883957	8716094	7508804	0.69	0.78	0.59
TRUE	Empty	TGGT1_230420-t26_1-p1 | transcript=TGGT1_230420-t26_1 | gene=TGGT1_230420 | organism=Toxoplasma_gondii_GT1 | gene_product=sarco/endoplasmic reticulum Ca2+-ATPase | transcript_product=sarco/endoplasmic reticulum Ca2+-ATPase | location=TGGT1_chrVIII:760295-772731(+) | protein_length=1093 | sequence_SO=chromosome | SO=protein_coding | is_pseudo=false	TGGT1_230420-t26_1-p1	119 kDa	0.99992	23	1	31303860	28236160	32809150	0.29	0.69	0.84
TRUE	Empty	TGGT1_247450-t26_1-p1 | transcript=TGGT1_247450-t26_1 | gene=TGGT1_247450 | organism=Toxoplasma_gondii_GT1 | gene_product=hypothetical protein | transcript_product=hypothetical protein | location=TGGT1_chrXII:3275746-3284022(+) | protein_length=2303 | sequence_SO=chromosome | SO=protein_coding | is_pseudo=false	TGGT1_247450-t26_1-p1	246 kDa	0.999831	23	1	10263770	11130790	12890040	0.67	0.69	0.53
TRUE	Empty	TGGT1_235930-t26_1-p1 | transcript=TGGT1_235930-t26_1 | gene=TGGT1_235930 | organism=Toxoplasma_gondii_GT1 | gene_product=domain K- type RNA binding proteins family protein | transcript_product=domain K- type RNA binding proteins family protein | location=TGGT1_chrX:5075263-5081044(+) | protein_length=570 | sequence_SO=chromosome | SO=protein_coding | is_pseudo=false	TGGT1_235930-t26_1-p1	64 kDa	0.99974	22	1	246053400	253255400	301517100	0.72	0.92	0.62
TRUE	Empty	TGGT1_263180-t26_1-p1 | transcript=TGGT1_263180-t26_1 | gene=TGGT1_263180 | organism=Toxoplasma_gondii_GT1 | gene_product=myosin D | transcript_product=myosin D | location=TGGT1_chrVIIb:714013-721737(-) | protein_length=822 | sequence_SO=chromosome | SO=protein_coding | is_pseudo=false	TGGT1_263180-t26_1-p1	91 kDa	0.999719	22	0.95	19081600	23839670	16346390	0.049	0.07	0.22
TRUE	Empty	TGGT1_232080-t26_1-p1 | transcript=TGGT1_232080-t26_1 | gene=TGGT1_232080 | organism=Toxoplasma_gondii_GT1 | gene_product=hypothetical protein | transcript_product=hypothetical protein | location=TGGT1_chrVIII:1804634-1839298(-) | protein_length=10329 | sequence_SO=chromosome | SO=protein_coding | is_pseudo=false	TGGT1_232080-t26_1-p1	1101 kDa	0.999545	23	1	1510083	1590202	1671966	0.88	0.74	0.75
TRUE	Empty	TGGT1_209210-t26_1-p1 | transcript=TGGT1_209210-t26_1 | gene=TGGT1_209210 | organism=Toxoplasma_gondii_GT1 | gene_product=hypothetical protein | transcript_product=hypothetical protein | location=TGGT1_chrIb:1139917-1148599(+) | protein_length=1492 | sequence_SO=chromosome | SO=protein_coding | is_pseudo=false	TGGT1_209210-t26_1-p1	167 kDa	0.999108	23	1	4950801	5625890	5712070	0.79	0.66	0.62
TRUE	Empty	TGGT1_231640-t26_1-p1 | transcript=TGGT1_231640-t26_1 | gene=TGGT1_231640 | organism=Toxoplasma_gondii_GT1 | gene_product=alveolin domain containing intermediate filament IMC1 | transcript_product=alveolin domain containing intermediate filament IMC1 | location=TGGT1_chrVIII:1511977-1514752(+) | protein_length=609 | sequence_SO=chromosome | SO=protein_coding | is_pseudo=false	TGGT1_231640-t26_1-p1	70 kDa	1	22	1	56470110	64663670	49043270	0.12	0.16	0.34
TRUE	Empty	TGGT1_206510-t26_1-p1 | transcript=TGGT1_206510-t26_1 | gene=TGGT1_206510 | organism=Toxoplasma_gondii_GT1 | gene_product=toxolysin TLN4 | transcript_product=toxolysin TLN4 | location=TGGT1_chrVIIa:879451-893239(+) | protein_length=2435 | sequence_SO=chromosome | SO=protein_coding | is_pseudo=false	TGGT1_206510-t26_1-p1	257 kDa	0.999994	22	1	6548252	8021549	5270107	0.021	0.34	0.33
TRUE	Empty	TGGT1_231410-t26_1-p1 | transcript=TGGT1_231410-t26_1 | gene=TGGT1_231410 | organism=Toxoplasma_gondii_GT1 | gene_product=hypothetical protein | transcript_product=hypothetical protein | location=TGGT1_chrVIII:1401693-1406022(+) | protein_length=571 | sequence_SO=chromosome | SO=protein_coding | is_pseudo=false	TGGT1_231410-t26_1-p1	65 kDa	0.999988	22	1	19323980	19819050	17057480	0.34	0.82	0.5
TRUE	Empty	TGGT1_251780-t26_1-p1 | transcript=TGGT1_251780-t26_1 | gene=TGGT1_251780 | organism=Toxoplasma_gondii_GT1 | gene_product=heat shock protein | transcript_product=heat shock protein | location=TGGT1_chrXII:5504595-5509577(-) | protein_length=728 | sequence_SO=chromosome | SO=protein_coding | is_pseudo=false	TGGT1_251780-t26_1-p1	78 kDa	0.999986	22	1	50324490	56224620	46621140	0.34	0.46	0.72
TRUE	Empty	TGGT1_292920-t26_1-p1 | transcript=TGGT1_292920-t26_1 | gene=TGGT1_292920 | organism=Toxoplasma_gondii_GT1 | gene_product=putative heat shock protein 75 | transcript_product=putative heat shock protein 75 | location=TGGT1_chrIa:3979-11415(+) | protein_length=861 | sequence_SO=chromosome | SO=protein_coding | is_pseudo=false	TGGT1_292920-t26_1-p1	95 kDa	0.999985	21	1	13373480	13892330	11838050	0.19	0.37	0.3
TRUE	Empty	TGGT1_316400B-t26_1-p1 | transcript=TGGT1_316400B-t26_1 | gene=TGGT1_316400B | organism=Toxoplasma_gondii_GT1 | gene_product=alpha tubulin TUBA1 | transcript_product=alpha tubulin TUBA1 | location=TGGT1_chrXI:5219470-5220918(+) | protein_length=432 | sequence_SO=chromosome | SO=protein_coding | is_pseudo=false	TGGT1_316400B-t26_1-p1	48 kDa	0.999978	16	1	258593000	284096800	251987300	0.071	0.62	0.88
TRUE	Empty	TGGT1_314970-t26_1-p1 | transcript=TGGT1_314970-t26_1 | gene=TGGT1_314970 | organism=Toxoplasma_gondii_GT1 | gene_product=root hair defective 3 gtp-binding protein (rhd3) protein | transcript_product=root hair defective 3 gtp-binding protein (rhd3) protein | location=TGGT1_chrXI:4386163-4399801(-) | protein_length=893 | sequence_SO=chromosome | SO=protein_coding | is_pseudo=false	TGGT1_314970-t26_1-p1	98 kDa	0.999924	22	1	24730410	23541380	23054730	0.53	0.73	0.63
TRUE	Empty	TGGT1_233120-t26_1-p1 | transcript=TGGT1_233120-t26_1 | gene=TGGT1_233120 | organism=Toxoplasma_gondii_GT1 | gene_product=AP2 domain transcription factor AP2VIII-2 | transcript_product=AP2 domain transcription factor AP2VIII-2 | location=TGGT1_chrVIII:2426324-2433835(-) | protein_length=2503 | sequence_SO=chromosome | SO=protein_coding | is_pseudo=false	TGGT1_233120-t26_1-p1	257 kDa	0.999833	22	1	4176545	3401262	3975139	0.46	0.6	0.9
TRUE	Empty	TGGT1_209030-t26_1-p1 | transcript=TGGT1_209030-t26_1 | gene=TGGT1_209030 | organism=Toxoplasma_gondii_GT1 | gene_product=actin ACT1 | transcript_product=actin ACT1 | location=TGGT1_chrIb:1014618-1016180(+) | protein_length=376 | sequence_SO=chromosome | SO=protein_coding | is_pseudo=false	TGGT1_209030-t26_1-p1	42 kDa	0.999821	20	0.95	464486500	391608100	525284000	0.41	0.51	0.64
TRUE	Empty	TGGT1_239752-t26_1-p1 | transcript=TGGT1_239752-t26_1 | gene=TGGT1_239752 | organism=Toxoplasma_gondii_GT1 | gene_product=hypothetical protein | transcript_product=hypothetical protein | location=TGGT1_chrVI:884973-888129(+) | protein_length=905 | sequence_SO=chromosome | SO=protein_coding | is_pseudo=false	TGGT1_239752-t26_1-p1	102 kDa	0.999611	22	1	15245850	16467770	17642270	0.56	0.81	0.67
TRUE	Empty	TGGT1_221660-t26_1-p1 | transcript=TGGT1_221660-t26_1 | gene=TGGT1_221660 | organism=Toxoplasma_gondii_GT1 | gene_product=DEAD/DEAH box helicase domain-containing protein | transcript_product=DEAD/DEAH box helicase domain-containing protein | location=TGGT1_chrII:500317-513716(+) | protein_length=1850 | sequence_SO=chromosome | SO=protein_coding | is_pseudo=false	TGGT1_221660-t26_1-p1	202 kDa	0.999561	22	1	4101153	4304073	5182867	0.47	0.77	0.31
TRUE	Empty	TGGT1_261080-t26_1-p1 | transcript=TGGT1_261080-t26_1 | gene=TGGT1_261080 | organism=Toxoplasma_gondii_GT1 | gene_product=kringle domain-containing protein | transcript_product=kringle domain-containing protein | location=TGGT1_chrVIIb:1823412-1845795(+) | protein_length=3051 | sequence_SO=chromosome | SO=protein_coding | is_pseudo=false	TGGT1_261080-t26_1-p1	338 kDa	0.999394	22	1	3120503	3008227	3169661	0.81	0.77	0.95
TRUE	Empty	TGGT1_290670-t26_1-p1 | transcript=TGGT1_290670-t26_1 | gene=TGGT1_290670 | organism=Toxoplasma_gondii_GT1 | gene_product=leucyl aminopeptidase LAP | transcript_product=leucyl aminopeptidase LAP | location=TGGT1_chrIX:3637150-3642271(+) | protein_length=781 | sequence_SO=chromosome | SO=protein_coding | is_pseudo=false	TGGT1_290670-t26_1-p1	83 kDa	0.998435	22	1	6071335	6526152	5388788	0.079	0.26	0.13
TRUE	Empty	TGGT1_363030-t26_1-p1 | transcript=TGGT1_363030-t26_1 | gene=TGGT1_363030 | organism=Toxoplasma_gondii_GT1 | gene_product=rhoptry protein ROP8 | transcript_product=rhoptry protein ROP8 | location=AAQM03000199:1511-3196(+) | protein_length=561 | sequence_SO=contig | SO=protein_coding | is_pseudo=false	TGGT1_363030-t26_1-p1	64 kDa	1	20	0.85	180759900	212824700	153458600	0.11	0.26	0.4
TRUE	Empty	TGGT1_310010-t26_1-p1 | transcript=TGGT1_310010-t26_1 | gene=TGGT1_310010 | organism=Toxoplasma_gondii_GT1 | gene_product=rhoptry neck protein RON1 | transcript_product=rhoptry neck protein RON1 | location=TGGT1_chrXI:969238-974493(+) | protein_length=1158 | sequence_SO=chromosome | SO=protein_coding | is_pseudo=false	TGGT1_310010-t26_1-p1	128 kDa	0.999994	21	1	14257780	16096900	12915800	0.057	0.048	0.2
TRUE	Empty	TGGT1_249390-t26_1-p1 | transcript=TGGT1_249390-t26_1 | gene=TGGT1_249390 | organism=Toxoplasma_gondii_GT1 | gene_product=glutamate/leucine/phenylalanine/valine dehydrogenase family protein | transcript_product=glutamate/leucine/phenylalanine/valine dehydrogenase family protein | location=TGGT1_chrXII:4441593-4452115(+) | protein_length=1206 | sequence_SO=chromosome | SO=protein_coding | is_pseud…	TGGT1_249390-t26_1-p1	135 kDa	0.999933	21	1	8251891	7040026	7488443	0.69	0.31	0.49
TRUE	Empty	TGGT1_268835-t26_1-p1 | transcript=TGGT1_268835-t26_1 | gene=TGGT1_268835 | organism=Toxoplasma_gondii_GT1 | gene_product=hypothetical protein | transcript_product=hypothetical protein | location=TGGT1_chrVIII:6256688-6265329(+) | protein_length=669 | sequence_SO=chromosome | SO=protein_coding | is_pseudo=false	TGGT1_268835-t26_1-p1	76 kDa	0.999932	21	1	15671460	16518800	12841170	0.074	0.35	0.14
TRUE	Empty	TGGT1_226250-t26_1-p1 | transcript=TGGT1_226250-t26_1 | gene=TGGT1_226250 | organism=Toxoplasma_gondii_GT1 | gene_product=DEAD (Asp-Glu-Ala-Asp) box polypeptide DDX3X | transcript_product=DEAD (Asp-Glu-Ala-Asp) box polypeptide DDX3X | location=TGGT1_chrX:1667417-1670378(+) | protein_length=734 | sequence_SO=chromosome | SO=protein_coding | is_pseudo=false	TGGT1_226250-t26_1-p1	79 kDa	0.99987	20	1	8802534	8030000	9646171	0.49	0.57	0.7
TRUE	Empty	TGGT1_230340-t26_1-p1 | transcript=TGGT1_230340-t26_1 | gene=TGGT1_230340 | organism=Toxoplasma_gondii_GT1 | gene_product=hypothetical protein | transcript_product=hypothetical protein | location=TGGT1_chrVIII:711206-715922(+) | protein_length=949 | sequence_SO=chromosome | SO=protein_coding | is_pseudo=false	TGGT1_230340-t26_1-p1	102 kDa	0.999861	21	1	8398763	9312569	8632834	0.75	0.36	0.91
TRUE	Empty	TGGT1_313370-t26_1-p1 | transcript=TGGT1_313370-t26_1 | gene=TGGT1_313370 | organism=Toxoplasma_gondii_GT1 | gene_product=hypothetical protein | transcript_product=hypothetical protein | location=TGGT1_chrXI:3281764-3287206(+) | protein_length=1687 | sequence_SO=chromosome | SO=protein_coding | is_pseudo=false	TGGT1_313370-t26_1-p1	175 kDa	0.999855	21	1	3126295	5128209	6484967	0.49	0.3	0.11
TRUE	Empty	TGGT1_252430-t26_1-p1 | transcript=TGGT1_252430-t26_1 | gene=TGGT1_252430 | organism=Toxoplasma_gondii_GT1 | gene_product=hypothetical protein | transcript_product=hypothetical protein | location=TGGT1_chrIII:551384-554261(+) | protein_length=767 | sequence_SO=chromosome | SO=protein_coding | is_pseudo=false	TGGT1_252430-t26_1-p1	84 kDa	0.999756	20	1	19928290	22416080	22757540	0.85	0.51	0.49
TRUE	Empty	TGGT1_273760-t26_1-p1 | transcript=TGGT1_273760-t26_1 | gene=TGGT1_273760 | organism=Toxoplasma_gondii_GT1 | gene_product=heat shock protein HSP70 | transcript_product=heat shock protein HSP70 | location=TGGT1_chrVIII:3285695-3287698(-) | protein_length=667 | sequence_SO=chromosome | SO=protein_coding | is_pseudo=false	TGGT1_273760-t26_1-p1	72 kDa	0.999505	21	0.9	19681030	20641950	20851560	0.97	0.81	0.8
TRUE	Empty	TGGT1_225125-t26_1-p1 | transcript=TGGT1_225125-t26_1 | gene=TGGT1_225125 | organism=Toxoplasma_gondii_GT1 | gene_product=pre-rRNA processing protein | transcript_product=pre-rRNA processing protein | location=TGGT1_chrX:2378306-2392984(+) | protein_length=2871 | sequence_SO=chromosome | SO=protein_coding | is_pseudo=false	TGGT1_225125-t26_1-p1	311 kDa	0.998542	20	1	3252666	3330055	2973922	0.83	0.96	0.89
TRUE	Empty	TGGT1_224260-t26_1-p1 | transcript=TGGT1_224260-t26_1 | gene=TGGT1_224260 | organism=Toxoplasma_gondii_GT1 | gene_product=PHD-finger domain-containing protein | transcript_product=PHD-finger domain-containing protein | location=TGGT1_chrX:3059832-3081619(-) | protein_length=5658 | sequence_SO=chromosome | SO=protein_coding | is_pseudo=false	TGGT1_224260-t26_1-p1	603 kDa	0.99833	21	1	1075793	1020580	1023600	0.99	0.9	0.91
TRUE	Empty	TGGT1_236210-t26_1-p1 | transcript=TGGT1_236210-t26_1 | gene=TGGT1_236210 | organism=Toxoplasma_gondii_GT1 | gene_product=putative peptidase M16 family potein | transcript_product=putative peptidase M16 family potein | location=TGGT1_chrX:5216353-5222014(+) | protein_length=509 | sequence_SO=chromosome | SO=protein_coding | is_pseudo=false	TGGT1_236210-t26_1-p1	57 kDa	0.999999	19	1	26178340	29839630	22938790	0.12	0.15	0.37
TRUE	Empty	TGGT1_243200-t26_1-p1 | transcript=TGGT1_243200-t26_1 | gene=TGGT1_243200 | organism=Toxoplasma_gondii_GT1 | gene_product=hypothetical protein | transcript_product=hypothetical protein | location=TGGT1_chrVI:2355009-2359636(-) | protein_length=1258 | sequence_SO=chromosome | SO=protein_coding | is_pseudo=false	TGGT1_243200-t26_1-p1	133 kDa	0.999997	20	1	3875625	5137197	4400792	0.027	0.36	0.65
TRUE	Empty	TGGT1_318510-t26_1-p1 | transcript=TGGT1_318510-t26_1 | gene=TGGT1_318510 | organism=Toxoplasma_gondii_GT1 | gene_product=putative N-ethylmaleimide-sensitive fusion protein | transcript_product=putative N-ethylmaleimide-sensitive fusion protein | location=TGGT1_chrIV:1205264-1217814(-) | protein_length=751 | sequence_SO=chromosome | SO=protein_coding | is_pseudo=false	TGGT1_318510-t26_1-p1	83 kDa	0.999995	20	1	5386978	5048687	5336814	0.61	0.52	0.86
TRUE	Empty	TGGT1_249990-t26_1-p1 | transcript=TGGT1_249990-t26_1 | gene=TGGT1_249990 | organism=Toxoplasma_gondii_GT1 | gene_product=hypothetical protein | transcript_product=hypothetical protein | location=TGGT1_chrXII:4909167-4913985(-) | protein_length=838 | sequence_SO=chromosome | SO=protein_coding | is_pseudo=false	TGGT1_249990-t26_1-p1	93 kDa	0.999992	20	1	14726500	14780080	12437780	0.18	0.97	0.11
TRUE	Empty	TGGT1_207620-t26_1-p1 | transcript=TGGT1_207620-t26_1 | gene=TGGT1_207620 | organism=Toxoplasma_gondii_GT1 | gene_product=pyridine nucleotide-disulfide oxidoreductase domain-containing protein | transcript_product=pyridine nucleotide-disulfide oxidoreductase domain-containing protein | location=TGGT1_chrIb:171089-178693(-) | protein_length=664 | sequence_SO=chromosome | SO=protein_coding | is_pse…	TGGT1_207620-t26_1-p1	71 kDa	0.999986	19	1	34789610	42170620	29638200	0.047	0.064	0.21
TRUE	Empty	TGGT1_291960-t26_1-p1 | transcript=TGGT1_291960-t26_1 | gene=TGGT1_291960 | organism=Toxoplasma_gondii_GT1 | gene_product=rhoptry kinase family protein ROP40 (incomplete catalytic triad) | transcript_product=rhoptry kinase family protein ROP40 (incomplete catalytic triad) | location=TGGT1_chrIX:4241532-4244563(+) | protein_length=525 | sequence_SO=chromosome | SO=protein_coding | is_pseudo=false	TGGT1_291960-t26_1-p1	58 kDa	0.999983	20	1	88573300	100755200	80549810	0.074	0.18	0.39
TRUE	Empty	TGGT1_269950-t26_1-p1 | transcript=TGGT1_269950-t26_1 | gene=TGGT1_269950 | organism=Toxoplasma_gondii_GT1 | gene_product=hypothetical protein | transcript_product=hypothetical protein | location=TGGT1_chrVIII:5501073-5504592(-) | protein_length=944 | sequence_SO=chromosome | SO=protein_coding | is_pseudo=false	TGGT1_269950-t26_1-p1	105 kDa	0.999969	20	1	8110206	9896975	7242048	0.15	0.047	0.49
TRUE	Empty	TGGT1_232050-t26_1-p1 | transcript=TGGT1_232050-t26_1 | gene=TGGT1_232050 | organism=Toxoplasma_gondii_GT1 | gene_product=DnaJ domain-containing protein | transcript_product=DnaJ domain-containing protein | location=TGGT1_chrVIII:1780837-1792241(-) | protein_length=869 | sequence_SO=chromosome | SO=protein_coding | is_pseudo=false	TGGT1_232050-t26_1-p1	96 kDa	0.999954	20	1	30533230	28895980	30623710	0.45	0.73	0.99
TRUE	Empty	TGGT1_240600-t26_1-p1 | transcript=TGGT1_240600-t26_1 | gene=TGGT1_240600 | organism=Toxoplasma_gondii_GT1 | gene_product=putative chaperonin cpn60 | transcript_product=putative chaperonin cpn60 | location=TGGT1_chrVI:1306402-1309981(+) | protein_length=667 | sequence_SO=chromosome | SO=protein_coding | is_pseudo=false	TGGT1_240600-t26_1-p1	72 kDa	0.99988	20	1	52434700	51713450	55342430	0.089	0.95	0.8
TRUE	Empty	TGGT1_270320-t26_1-p1 | transcript=TGGT1_270320-t26_1 | gene=TGGT1_270320 | organism=Toxoplasma_gondii_GT1 | gene_product=protein phosphatase 2C domain-containing protein | transcript_product=protein phosphatase 2C domain-containing protein | location=TGGT1_chrVIII:5274953-5280379(+) | protein_length=538 | sequence_SO=chromosome | SO=protein_coding | is_pseudo=false	TGGT1_270320-t26_1-p1	59 kDa	0.999793	19	1	11241570	11321150	9582571	0.17	0.97	0.41
TRUE	Empty	TGGT1_230350-t26_1-p1 | transcript=TGGT1_230350-t26_1 | gene=TGGT1_230350 | organism=Toxoplasma_gondii_GT1 | gene_product=hypothetical protein | transcript_product=hypothetical protein | location=TGGT1_chrVIII:718292-730284(-) | protein_length=1254 | sequence_SO=chromosome | SO=protein_coding | is_pseudo=false	TGGT1_230350-t26_1-p1	139 kDa	0.999588	20	1	13425740	15302220	11159230	0.27	0.2	0.49
TRUE	Empty	TGGT1_259260-t26_1-p1 | transcript=TGGT1_259260-t26_1 | gene=TGGT1_259260 | organism=Toxoplasma_gondii_GT1 | gene_product=membrane protein FtsH1 | transcript_product=membrane protein FtsH1 | location=TGGT1_chrVIIb:2788863-2795704(-) | protein_length=1250 | sequence_SO=chromosome | SO=protein_coding | is_pseudo=false	TGGT1_259260-t26_1-p1	137 kDa	0.999582	20	0.95	13055450	14116060	15191330	0.15	0.71	0.5
TRUE	Empty	TGGT1_313410-t26_1-p1 | transcript=TGGT1_313410-t26_1 | gene=TGGT1_313410 | organism=Toxoplasma_gondii_GT1 | gene_product=proteasome 26S regulatory subunit | transcript_product=proteasome 26S regulatory subunit | location=TGGT1_chrXI:3312986-3323185(+) | protein_length=1091 | sequence_SO=chromosome | SO=protein_coding | is_pseudo=false	TGGT1_313410-t26_1-p1	118 kDa	0.999359	20	1	2196193	2267864	2029263	0.39	0.8	0.15
TRUE	Empty	TGGT1_222100-t26_1-p1 | transcript=TGGT1_222100-t26_1 | gene=TGGT1_222100 | organism=Toxoplasma_gondii_GT1 | gene_product=hypothetical protein | transcript_product=hypothetical protein | location=TGGT1_chrII:851582-855004(-) | protein_length=1140 | sequence_SO=chromosome | SO=protein_coding | is_pseudo=false	TGGT1_222100-t26_1-p1	128 kDa	0.999214	20	1	3048221	3808068	2221622	0.026	0.31	0.17
TRUE	Empty	TGGT1_262920-t26_1-p1 | transcript=TGGT1_262920-t26_1 | gene=TGGT1_262920 | organism=Toxoplasma_gondii_GT1 | gene_product=trypsin domain-containing protein | transcript_product=trypsin domain-containing protein | location=TGGT1_chrVIIb:896939-905694(+) | protein_length=972 | sequence_SO=chromosome | SO=protein_coding | is_pseudo=false	TGGT1_262920-t26_1-p1	105 kDa	0.999081	20	1	13291890	13917600	11960960	0.29	0.72	0.4
TRUE	Empty	TGGT1_313270-t26_1-p1 | transcript=TGGT1_313270-t26_1 | gene=TGGT1_313270 | organism=Toxoplasma_gondii_GT1 | gene_product=hypothetical protein | transcript_product=hypothetical protein | location=TGGT1_chrXI:3183953-3196338(+) | protein_length=2799 | sequence_SO=chromosome | SO=protein_coding | is_pseudo=false	TGGT1_313270-t26_1-p1	281 kDa	0.998833	20	1	2035428	853411	1867337	0.41	0.19	0.93
TRUE	Empty	TGGT1_321640-t26_1-p1 | transcript=TGGT1_321640-t26_1 | gene=TGGT1_321640 | organism=Toxoplasma_gondii_GT1 | gene_product=cell division protein CDC48AP | transcript_product=cell division protein CDC48AP | location=TGGT1_chrIb:1672063-1681153(-) | protein_length=1044 | sequence_SO=chromosome | SO=protein_coding | is_pseudo=false	TGGT1_321640-t26_1-p1	113 kDa	0.998797	20	0.9	9686395	9945711	9016264	0.27	0.89	0.73
TRUE	Empty	TGGT1_247195-t26_1-p1 | transcript=TGGT1_247195-t26_1 | gene=TGGT1_247195 | organism=Toxoplasma_gondii_GT1 | gene_product=microneme protein MIC15 | transcript_product=microneme protein MIC15 | location=TGGT1_chrXII:3076266-3106706(-) | protein_length=2924 | sequence_SO=chromosome | SO=protein_coding | is_pseudo=false	TGGT1_247195-t26_1-p1	320 kDa	0.99721	20	1	4876792	5136120	3689366	0.34	0.89	0.48
TRUE	Empty	TGGT1_253750-t26_1-p1 | transcript=TGGT1_253750-t26_1 | gene=TGGT1_253750 | organism=Toxoplasma_gondii_GT1 | gene_product=PLU-1 family protein | transcript_product=PLU-1 family protein | location=TGGT1_chrIII:1126566-1154665(-) | protein_length=8088 | sequence_SO=chromosome | SO=protein_coding | is_pseudo=false	TGGT1_253750-t26_1-p1	856 kDa	0.996413	20	1	1031438	1398374	1239952	0.15	0.64	0.77
TRUE	Empty	TGGT1_410370-t26_1-p1 | transcript=TGGT1_410370-t26_1 | gene=TGGT1_410370 | organism=Toxoplasma_gondii_GT1 | gene_product=putative transmembrane protein | transcript_product=putative transmembrane protein | location=AAQM03000265:733-2584(+) | protein_length=435 | sequence_SO=contig | SO=protein_coding | is_pseudo=false	TGGT1_410370-t26_1-p1	48 kDa	0.994962	19	0.21	7570360	8915931	8342755	0.12	0.25	0.44
TRUE	Empty	TGGT1_212300-t26_1-p1 | transcript=TGGT1_212300-t26_1 | gene=TGGT1_212300 | organism=Toxoplasma_gondii_GT1 | gene_product=hypothetical protein | transcript_product=hypothetical protein | location=TGGT1_chrX:3837742-3842895(+) | protein_length=683 | sequence_SO=chromosome | SO=protein_coding | is_pseudo=false	TGGT1_212300-t26_1-p1	76 kDa	1	19	1	7586228	7438841	7114006	0.7	0.87	0.36
TRUE	Empty	TGGT1_277270-t26_1-p1 | transcript=TGGT1_277270-t26_1 | gene=TGGT1_277270 | organism=Toxoplasma_gondii_GT1 | gene_product=NTPase II | transcript_product=NTPase II | location=AAQM03000418:1-4939(+) | protein_length=862 | sequence_SO=contig | SO=protein_coding | is_pseudo=false	TGGT1_277270-t26_1-p1	96 kDa	0.999997	19	0.32	19804480	23516530	15469200	0.061	0.54	0.42
TRUE	Empty	TGGT1_265840-t26_1-p1 | transcript=TGGT1_265840-t26_1 | gene=TGGT1_265840 | organism=Toxoplasma_gondii_GT1 | gene_product=hypothetical protein | transcript_product=hypothetical protein | location=TGGT1_chrIX:1241089-1248136(+) | protein_length=1332 | sequence_SO=chromosome | SO=protein_coding | is_pseudo=false	TGGT1_265840-t26_1-p1	148 kDa	0.999973	19	1	9398153	6102706	10824930	0.078	0.19	0.61
TRUE	Empty	TGGT1_232600-t26_1-p1 | transcript=TGGT1_232600-t26_1 | gene=TGGT1_232600 | organism=Toxoplasma_gondii_GT1 | gene_product=phospholipase, patatin family protein | transcript_product=phospholipase, patatin family protein | location=TGGT1_chrVIII:2182196-2184854(+) | protein_length=665 | sequence_SO=chromosome | SO=protein_coding | is_pseudo=false	TGGT1_232600-t26_1-p1	71 kDa	0.999957	19	1	15924380	17335410	17729030	0.66	0.77	0.71
TRUE	Empty	TGGT1_313140-t26_1-p1 | transcript=TGGT1_313140-t26_1 | gene=TGGT1_313140 | organism=Toxoplasma_gondii_GT1 | gene_product=isocitrate dehydrogenase | transcript_product=isocitrate dehydrogenase | location=TGGT1_chrXI:3095680-3101525(-) | protein_length=621 | sequence_SO=chromosome | SO=protein_coding | is_pseudo=false	TGGT1_313140-t26_1-p1	68 kDa	0.999931	17	0.94	31319600	35490940	29046150	0.36	0.29	0.71
TRUE	Empty	TGGT1_254880-t26_1-p1 | transcript=TGGT1_254880-t26_1 | gene=TGGT1_254880 | organism=Toxoplasma_gondii_GT1 | gene_product=Alpha-galactosidase | transcript_product=Alpha-galactosidase | location=TGGT1_chrIII:1983229-1990947(+) | protein_length=747 | sequence_SO=chromosome | SO=protein_coding | is_pseudo=false	TGGT1_254880-t26_1-p1	82 kDa	0.999929	19	1	8937562	9580119	9199560	0.84	0.35	0.88
TRUE	Empty	TGGT1_214970-t26_1-p1 | transcript=TGGT1_214970-t26_1 | gene=TGGT1_214970 | organism=Toxoplasma_gondii_GT1 | gene_product=putative DNA replication licensing factor | transcript_product=putative DNA replication licensing factor | location=TGGT1_chrX:6526260-6536268(+) | protein_length=1049 | sequence_SO=chromosome | SO=protein_coding | is_pseudo=false	TGGT1_214970-t26_1-p1	117 kDa	0.999876	19	1	3763766	5016935	4280500	0.66	0.47	0.55
TRUE	Empty	TGGT1_290160-t26_1-p1 | transcript=TGGT1_290160-t26_1 | gene=TGGT1_290160 | organism=Toxoplasma_gondii_GT1 | gene_product=putative sortilin | transcript_product=putative sortilin | location=TGGT1_chrIX:3410442-3420211(-) | protein_length=1033 | sequence_SO=chromosome | SO=protein_coding | is_pseudo=false	TGGT1_290160-t26_1-p1	114 kDa	0.999855	19	1	19753140	20612010	20524340	0.81	0.84	0.85
TRUE	Empty	TGGT1_224060-t26_1-p1 | transcript=TGGT1_224060-t26_1 | gene=TGGT1_224060 | organism=Toxoplasma_gondii_GT1 | gene_product=putative thioredoxin | transcript_product=putative thioredoxin | location=TGGT1_chrX:3262854-3264722(-) | protein_length=622 | sequence_SO=chromosome | SO=protein_coding | is_pseudo=false	TGGT1_224060-t26_1-p1	69 kDa	0.999853	19	1	24600310	23146750	24237440	0.39	0.81	0.95
TRUE	Empty	TGGT1_288380-t26_1-p1 | transcript=TGGT1_288380-t26_1 | gene=TGGT1_288380 | organism=Toxoplasma_gondii_GT1 | gene_product=heat shock protein HSP90 | transcript_product=heat shock protein HSP90 | location=TGGT1_chrIX:2294323-2298742(+) | protein_length=708 | sequence_SO=chromosome | SO=protein_coding | is_pseudo=false	TGGT1_288380-t26_1-p1	82 kDa	0.999845	19	1	15219180	14760650	14665340	0.99	0.93	0.86
TRUE	Empty	TGGT1_224850-t26_1-p1 | transcript=TGGT1_224850-t26_1 | gene=TGGT1_224850 | organism=Toxoplasma_gondii_GT1 | gene_product=putative polyadenylate binding protein | transcript_product=putative polyadenylate binding protein | location=TGGT1_chrX:2687512-2689821(+) | protein_length=769 | sequence_SO=chromosome | SO=protein_coding | is_pseudo=false	TGGT1_224850-t26_1-p1	83 kDa	0.999833	17	1	31486340	31430220	28583990	0.021	0.97	0.19
TRUE	Empty	TGGT1_269190-t26_1-p1 | transcript=TGGT1_269190-t26_1 | gene=TGGT1_269190 | organism=Toxoplasma_gondii_GT1 | gene_product=glyceraldehyde-3-phosphate dehydrogenase GAPDH2 | transcript_product=glyceraldehyde-3-phosphate dehydrogenase GAPDH2 | location=TGGT1_chrVIII:6001367-6005276(-) | protein_length=995 | sequence_SO=chromosome | SO=protein_coding | is_pseudo=false	TGGT1_269190-t26_1-p1	105 kDa	0.999793	18	1	31790570	34091510	33723320	0.92	0.71	0.78
TRUE	Empty	TGGT1_204050-t26_1-p1 | transcript=TGGT1_204050-t26_1 | gene=TGGT1_204050 | organism=Toxoplasma_gondii_GT1 | gene_product=subtilisin SUB1 | transcript_product=subtilisin SUB1 | location=TGGT1_chrVIIa:1932241-1938144(+) | protein_length=795 | sequence_SO=chromosome | SO=protein_coding | is_pseudo=false	TGGT1_204050-t26_1-p1	85 kDa	0.999766	19	1	13224140	8903273	7878791	0.39	0.095	0.042
TRUE	Empty	TGGT1_268370-t26_1-p1 | transcript=TGGT1_268370-t26_1 | gene=TGGT1_268370 | organism=Toxoplasma_gondii_GT1 | gene_product=non-specific serine/threonine protein kinase | transcript_product=non-specific serine/threonine protein kinase | location=TGGT1_chrVIII:6481671-6517585(-) | protein_length=8429 | sequence_SO=chromosome | SO=protein_coding | is_pseudo=false	TGGT1_268370-t26_1-p1	904 kDa	0.999707	19	1	720580	592466	674317	0.38	0.32	0.76
TRUE	Empty	TGGT1_221870-t26_1-p1 | transcript=TGGT1_221870-t26_1 | gene=TGGT1_221870 | organism=Toxoplasma_gondii_GT1 | gene_product=hypothetical protein | transcript_product=hypothetical protein | location=TGGT1_chrII:627827-634682(+) | protein_length=1373 | sequence_SO=chromosome | SO=protein_coding | is_pseudo=false	TGGT1_221870-t26_1-p1	144 kDa	0.999599	18	1	13645550	11273660	14383530	0.033	0.47	0.83
TRUE	Empty	TGGT1_241170-t26_1-p1 | transcript=TGGT1_241170-t26_1 | gene=TGGT1_241170 | organism=Toxoplasma_gondii_GT1 | gene_product=hypothetical protein | transcript_product=hypothetical protein | location=TGGT1_chrVI:1639455-1643673(+) | protein_length=1275 | sequence_SO=chromosome | SO=protein_coding | is_pseudo=false	TGGT1_241170-t26_1-p1	140 kDa	0.99934	19	1	6566244	6719756	7873723	0.7	0.94	0.57
TRUE	Empty	TGGT1_204400-t26_1-p1 | transcript=TGGT1_204400-t26_1 | gene=TGGT1_204400 | organism=Toxoplasma_gondii_GT1 | gene_product=putative ATPase synthase subunit alpha | transcript_product=putative ATPase synthase subunit alpha | location=TGGT1_chrVIIa:1716199-1723634(+) | protein_length=577 | sequence_SO=chromosome | SO=protein_coding | is_pseudo=false	TGGT1_204400-t26_1-p1	62 kDa	0.999111	19	1	87321290	95380540	81427550	0.41	0.46	0.74
TRUE	Empty	TGGT1_226960-t26_1-p1 | transcript=TGGT1_226960-t26_1 | gene=TGGT1_226960 | organism=Toxoplasma_gondii_GT1 | gene_product=phosphofructokinase PFKII | transcript_product=phosphofructokinase PFKII | location=TGGT1_chrX:1093641-1104060(-) | protein_length=1225 | sequence_SO=chromosome | SO=protein_coding | is_pseudo=false	TGGT1_226960-t26_1-p1	131 kDa	0.998454	19	1	6463996	6015914	5178043	0.28	0.63	0.12
TRUE	Empty	TGGT1_243250-t26_1-p1 | transcript=TGGT1_243250-t26_1 | gene=TGGT1_243250 | organism=Toxoplasma_gondii_GT1 | gene_product=myosin H | transcript_product=myosin H | location=TGGT1_chrVI:2380998-2399536(-) | protein_length=1513 | sequence_SO=chromosome | SO=protein_coding | is_pseudo=false	TGGT1_243250-t26_1-p1	170 kDa	0.998427	19	1	3880679	4603623	3777568	0.32	0.4	0.9
TRUE	Empty	TGGT1_204340-t26_1-p1 | transcript=TGGT1_204340-t26_1 | gene=TGGT1_204340 | organism=Toxoplasma_gondii_GT1 | gene_product=hypothetical protein | transcript_product=hypothetical protein | location=TGGT1_chrVIIa:1770608-1775101(-) | protein_length=877 | sequence_SO=chromosome | SO=protein_coding | is_pseudo=false	TGGT1_204340-t26_1-p1	97 kDa	0.998128	19	1	4161380	3469493	3666912	0.79	0.47	0.52
TRUE	Empty	TGGT1_237280-t26_1-p1 | transcript=TGGT1_237280-t26_1 | gene=TGGT1_237280 | organism=Toxoplasma_gondii_GT1 | gene_product=TLD protein | transcript_product=TLD protein | location=TGGT1_chrX:5711509-5719913(+) | protein_length=2190 | sequence_SO=chromosome | SO=protein_coding | is_pseudo=false	TGGT1_237280-t26_1-p1	233 kDa	0.998089	19	1	22389250	12110410	14070780	0.9	0.52	0.57
TRUE	Empty	TGGT1_258210-t26_1-p1 | transcript=TGGT1_258210-t26_1 | gene=TGGT1_258210 | organism=Toxoplasma_gondii_GT1 | gene_product=DNA-directed RNA polymerase II RPB2 | transcript_product=DNA-directed RNA polymerase II RPB2 | location=TGGT1_chrVIIb:3470288-3483592(+) | protein_length=1259 | sequence_SO=chromosome | SO=protein_coding | is_pseudo=false	TGGT1_258210-t26_1-p1	141 kDa	0.997877	19	1	13347490	11646130	17613390	0.097	0.37	0.059
TRUE	Empty	TGGT1_275490-t26_1-p1 | transcript=TGGT1_275490-t26_1 | gene=TGGT1_275490 | organism=Toxoplasma_gondii_GT1 | gene_product=hypothetical protein | transcript_product=hypothetical protein | location=TGGT1_chrX:7191250-7202951(-) | protein_length=1999 | sequence_SO=chromosome | SO=protein_coding | is_pseudo=false	TGGT1_275490-t26_1-p1	216 kDa	0.996595	19	1	3180237	2849284	3430459	0.47	0.74	0.83
TRUE	Empty	TGGT1_298610-t26_1-p1 | transcript=TGGT1_298610-t26_1 | gene=TGGT1_298610 | organism=Toxoplasma_gondii_GT1 | gene_product=GYF domain-containing protein | transcript_product=GYF domain-containing protein | location=TGGT1_chrXI:6511021-6521705(+) | protein_length=2331 | sequence_SO=chromosome | SO=protein_coding | is_pseudo=false	TGGT1_298610-t26_1-p1	238 kDa	0.995176	19	1	2049309	1707396	1675579	0.93	0.34	0.24
TRUE	Empty	TGGT1_221620-t26_1-p1 | transcript=TGGT1_221620-t26_1 | gene=TGGT1_221620 | organism=Toxoplasma_gondii_GT1 | gene_product=putative beta-tubulin | transcript_product=putative beta-tubulin | location=TGGT1_chrII:472166-474503(-) | protein_length=449 | sequence_SO=chromosome | SO=protein_coding | is_pseudo=false	TGGT1_221620-t26_1-p1	50 kDa	0.994139	18	0.28	15577720	18287470	12533350	0.042	0.3	0.16
TRUE	Empty	TGGT1_280380-t26_1-p1 | transcript=TGGT1_280380-t26_1 | gene=TGGT1_280380 | organism=Toxoplasma_gondii_GT1 | gene_product=poly(ADP-ribose) glycohydrolase | transcript_product=poly(ADP-ribose) glycohydrolase | location=TGGT1_chrVIIa:467123-469417(+) | protein_length=553 | sequence_SO=chromosome | SO=protein_coding | is_pseudo=false	TGGT1_280380-t26_1-p1	62 kDa	1	18	1	14419820	12788820	10744820	0.21	0.39	0.076
TRUE	Empty	TGGT1_231630-t26_1-p1 | transcript=TGGT1_231630-t26_1 | gene=TGGT1_231630 | organism=Toxoplasma_gondii_GT1 | gene_product=alveolin domain containing intermediate filament IMC4 | transcript_product=alveolin domain containing intermediate filament IMC4 | location=TGGT1_chrVIII:1508307-1510463(-) | protein_length=452 | sequence_SO=chromosome | SO=protein_coding | is_pseudo=false	TGGT1_231630-t26_1-p1	50 kDa	0.999997	10	1	56123480	57741990	44145260	0.018	0.84	0.2
TRUE	Empty	TGGT1_226890-t26_1-p1 | transcript=TGGT1_226890-t26_1 | gene=TGGT1_226890 | organism=Toxoplasma_gondii_GT1 | gene_product=hypothetical protein | transcript_product=hypothetical protein | location=TGGT1_chrX:1166477-1173027(+) | protein_length=2068 | sequence_SO=chromosome | SO=protein_coding | is_pseudo=false	TGGT1_226890-t26_1-p1	224 kDa	0.999996	18	1	5447868	4824238	6320497	0.2	0.052	0.41
TRUE	Empty	TGGT1_208030-t26_1-p1 | transcript=TGGT1_208030-t26_1 | gene=TGGT1_208030 | organism=Toxoplasma_gondii_GT1 | gene_product=microneme protein MIC4 | transcript_product=microneme protein MIC4 | location=TGGT1_chrIb:547335-549077(+) | protein_length=580 | sequence_SO=chromosome | SO=protein_coding | is_pseudo=false	TGGT1_208030-t26_1-p1	63 kDa	0.999993	17	1	84487620	107798300	72490640	0.011	0.26	0.45
TRUE	Empty	TGGT1_263730-t26_1-p1 | transcript=TGGT1_263730-t26_1 | gene=TGGT1_263730 | organism=Toxoplasma_gondii_GT1 | gene_product=FAD-dependent glycerol-3-phosphate dehydrogenase | transcript_product=FAD-dependent glycerol-3-phosphate dehydrogenase | location=TGGT1_chrVIIb:330001-337948(-) | protein_length=653 | sequence_SO=chromosome | SO=protein_coding | is_pseudo=false	TGGT1_263730-t26_1-p1	72 kDa	0.999984	18	1	10211230	11577150	9327017	0.36	0.21	0.68
TRUE	Empty	TGGT1_310750-t26_1-p1 | transcript=TGGT1_310750-t26_1 | gene=TGGT1_310750 | organism=Toxoplasma_gondii_GT1 | gene_product=emp24/gp25L/p24 family protein | transcript_product=emp24/gp25L/p24 family protein | location=TGGT1_chrXI:1533084-1537096(+) | protein_length=601 | sequence_SO=chromosome | SO=protein_coding | is_pseudo=false	TGGT1_310750-t26_1-p1	65 kDa	0.999973	15	1	29649010	27971070	30718840	0.16	0.83	0.9
TRUE	Empty	TGGT1_304760-t26_1-p1 | transcript=TGGT1_304760-t26_1 | gene=TGGT1_304760 | organism=Toxoplasma_gondii_GT1 | gene_product=RNA recognition motif-containing protein | transcript_product=RNA recognition motif-containing protein | location=TGGT1_chrVIIa:667907-675253(+) | protein_length=1335 | sequence_SO=chromosome | SO=protein_coding | is_pseudo=false	TGGT1_304760-t26_1-p1	147 kDa	0.999973	18	1	3293251	3994710	3326854	0.051	0.64	0.98
TRUE	Empty	TGGT1_313910-t26_1-p1 | transcript=TGGT1_313910-t26_1 | gene=TGGT1_313910 | organism=Toxoplasma_gondii_GT1 | gene_product=RNA recognition motif 2 protein | transcript_product=RNA recognition motif 2 protein | location=TGGT1_chrXI:3766770-3770119(+) | protein_length=903 | sequence_SO=chromosome | SO=protein_coding | is_pseudo=false	TGGT1_313910-t26_1-p1	100 kDa	0.999972	17	1	19290530	16883310	18793840	0.8	0.53	0.95
TRUE	Empty	TGGT1_289540-t26_1-p1 | transcript=TGGT1_289540-t26_1 | gene=TGGT1_289540 | organism=Toxoplasma_gondii_GT1 | gene_product=hypothetical protein | transcript_product=hypothetical protein | location=TGGT1_chrIX:3100902-3103715(+) | protein_length=937 | sequence_SO=chromosome | SO=protein_coding | is_pseudo=false	TGGT1_289540-t26_1-p1	101 kDa	0.999965	18	1	4319308	3943245	2639520	0.033	0.63	0.076
TRUE	Empty	TGGT1_202680-t26_1-p1 | transcript=TGGT1_202680-t26_1 | gene=TGGT1_202680 | organism=Toxoplasma_gondii_GT1 | gene_product=putative peptidase M16, alpha subunit | transcript_product=putative peptidase M16, alpha subunit | location=TGGT1_chrVIIa:3006392-3012675(-) | protein_length=563 | sequence_SO=chromosome | SO=protein_coding | is_pseudo=false	TGGT1_202680-t26_1-p1	62 kDa	0.999961	17	1	38462770	43129240	40735850	0.68	0.4	0.71
TRUE	Empty	TGGT1_224210-t26_1-p1 | transcript=TGGT1_224210-t26_1 | gene=TGGT1_224210 | organism=Toxoplasma_gondii_GT1 | gene_product=hypothetical protein | transcript_product=hypothetical protein | location=TGGT1_chrX:3128859-3139913(-) | protein_length=1175 | sequence_SO=chromosome | SO=protein_coding | is_pseudo=false	TGGT1_224210-t26_1-p1	130 kDa	0.999951	18	1	6708477	5966369	8017842	0.48	0.63	0.69
TRUE	Empty	TGGT1_209950-t26_1-p1 | transcript=TGGT1_209950-t26_1 | gene=TGGT1_209950 | organism=Toxoplasma_gondii_GT1 | gene_product=putative thioredoxin | transcript_product=putative thioredoxin | location=TGGT1_chrIb:1585569-1589285(-) | protein_length=424 | sequence_SO=chromosome | SO=protein_coding | is_pseudo=false	TGGT1_209950-t26_1-p1	48 kDa	0.999913	18	1	92977030	104352600	109864500	0.7	0.75	0.65
TRUE	Empty	TGGT1_243960-t26_1-p1 | transcript=TGGT1_243960-t26_1 | gene=TGGT1_243960 | organism=Toxoplasma_gondii_GT1 | gene_product=nuclear transport factor 2 (ntf2) domain-containing protein | transcript_product=nuclear transport factor 2 (ntf2) domain-containing protein | location=TGGT1_chrVI:2828443-2833407(-) | protein_length=797 | sequence_SO=chromosome | SO=protein_coding | is_pseudo=false	TGGT1_243960-t26_1-p1	84 kDa	0.999896	17	1	8251411	8536009	8087459	0.82	0.91	0.94
TRUE	Empty	TGGT1_270770-t26_1-p1 | transcript=TGGT1_270770-t26_1 | gene=TGGT1_270770 | organism=Toxoplasma_gondii_GT1 | gene_product=PWI domain-containing protein | transcript_product=PWI domain-containing protein | location=TGGT1_chrVIII:4997193-5006045(-) | protein_length=782 | sequence_SO=chromosome | SO=protein_coding | is_pseudo=false	TGGT1_270770-t26_1-p1	87 kDa	0.999763	18	1	52368540	51243030	60415310	0.5	0.92	0.51
TRUE	Empty	TGGT1_233460-t26_1-p1 | transcript=TGGT1_233460-t26_1 | gene=TGGT1_233460 | organism=Toxoplasma_gondii_GT1 | gene_product=SAG-related sequence SRS29B | transcript_product=SAG-related sequence SRS29B | location=TGGT1_chrVIII:2660455-2661465(+) | protein_length=336 | sequence_SO=chromosome | SO=protein_coding | is_pseudo=false	TGGT1_233460-t26_1-p1	35 kDa	0.99976	18	1	243020000	279210900	208840500	0.18	0.21	0.45
TRUE	Empty	TGGT1_260600-t26_1-p1 | transcript=TGGT1_260600-t26_1 | gene=TGGT1_260600 | organism=Toxoplasma_gondii_GT1 | gene_product=Pumilio-family RNA binding repeat-containing protein | transcript_product=Pumilio-family RNA binding repeat-containing protein | location=TGGT1_chrVIIb:2104300-2113824(+) | protein_length=1676 | sequence_SO=chromosome | SO=protein_coding | is_pseudo=false	TGGT1_260600-t26_1-p1	173 kDa	0.999648	18	1	3131623	2973484	2991193	0.98	0.74	0.84
TRUE	Empty	TGGT1_293630-t26_1-p1 | transcript=TGGT1_293630-t26_1 | gene=TGGT1_293630 | organism=Toxoplasma_gondii_GT1 | gene_product=hypothetical protein | transcript_product=hypothetical protein | location=TGGT1_chrIa:450631-460815(-) | protein_length=811 | sequence_SO=chromosome | SO=protein_coding | is_pseudo=false	TGGT1_293630-t26_1-p1	90 kDa	0.999574	17	1	48615980	43856270	53771560	0.44	0.56	0.59
TRUE	Empty	TGGT1_219700-t26_1-p1 | transcript=TGGT1_219700-t26_1 | gene=TGGT1_219700 | organism=Toxoplasma_gondii_GT1 | gene_product=putative DNA replication licensing factor MCM4 | transcript_product=putative DNA replication licensing factor MCM4 | location=TGGT1_chrXII:651605-660187(+) | protein_length=1014 | sequence_SO=chromosome | SO=protein_coding | is_pseudo=false	TGGT1_219700-t26_1-p1	112 kDa	0.998989	18	1	3056710	4134243	2857643	0.21	0.24	0.8
TRUE	Empty	TGGT1_258090-t26_1-p1 | transcript=TGGT1_258090-t26_1 | gene=TGGT1_258090 | organism=Toxoplasma_gondii_GT1 | gene_product=hypothetical protein | transcript_product=hypothetical protein | location=TGGT1_chrVIIb:3544361-3553453(-) | protein_length=954 | sequence_SO=chromosome | SO=protein_coding | is_pseudo=false	TGGT1_258090-t26_1-p1	106 kDa	0.998925	18	1	3313693	4294250	3242614	0.022	0.02	0.71
TRUE	Empty	TGGT1_234230-t26_1-p1 | transcript=TGGT1_234230-t26_1 | gene=TGGT1_234230 | organism=Toxoplasma_gondii_GT1 | gene_product=hypothetical protein | transcript_product=hypothetical protein | location=TGGT1_chrX:4104920-4121364(-) | protein_length=4625 | sequence_SO=chromosome | SO=protein_coding | is_pseudo=false	TGGT1_234230-t26_1-p1	491 kDa	0.998518	18	1	1636388	1539649	2367196	0.028	0.85	0.31
TRUE	Empty	TGGT1_215590-t26_1-p1 | transcript=TGGT1_215590-t26_1 | gene=TGGT1_215590 | organism=Toxoplasma_gondii_GT1 | gene_product=flavoprotein subunit of succinate dehydrogenase | transcript_product=flavoprotein subunit of succinate dehydrogenase | location=TGGT1_chrX:6924001-6933881(-) | protein_length=669 | sequence_SO=chromosome | SO=protein_coding | is_pseudo=false	TGGT1_215590-t26_1-p1	73 kDa	0.998278	18	1	8371199	9662135	7491667	0.18	0.14	0.5
TRUE	Empty	TGGT1_266960-t26_1-p1 | transcript=TGGT1_266960-t26_1 | gene=TGGT1_266960 | organism=Toxoplasma_gondii_GT1 | gene_product=beta-tubulin | transcript_product=beta-tubulin | location=TGGT1_chrIX:705551-707606(-) | protein_length=449 | sequence_SO=chromosome | SO=protein_coding | is_pseudo=false	TGGT1_266960-t26_1-p1	50 kDa	0.997654	17	0.24	24361200	27765610	19489630	0.056	0.43	0.3
TRUE	Empty	TGGT1_244880-t26_1-p1 | transcript=TGGT1_244880-t26_1 | gene=TGGT1_244880 | organism=Toxoplasma_gondii_GT1 | gene_product=DNA-directed RNA polymerase I RPA1 | transcript_product=DNA-directed RNA polymerase I RPA1 | location=TGGT1_chrVI:3471329-3494157(+) | protein_length=2768 | sequence_SO=chromosome | SO=protein_coding | is_pseudo=false	TGGT1_244880-t26_1-p1	302 kDa	0.996184	18	1	1481556	1528724	1422485	0.75	0.91	0.91
TRUE	Empty	TGGT1_233220-t26_1-p1 | transcript=TGGT1_233220-t26_1 | gene=TGGT1_233220 | organism=Toxoplasma_gondii_GT1 | gene_product=hypothetical protein | transcript_product=hypothetical protein | location=TGGT1_chrVIII:2508163-2514202(-) | protein_length=1476 | sequence_SO=chromosome | SO=protein_coding | is_pseudo=false	TGGT1_233220-t26_1-p1	160 kDa	0.995637	18	1	2563946	2646183	2706502	0.97	0.89	0.92
TRUE	Empty	TGGT1_301440-t26_1-p1 | transcript=TGGT1_301440-t26_1 | gene=TGGT1_301440 | organism=Toxoplasma_gondii_GT1 | gene_product=calcium-dependent protein kinase CDPK1 | transcript_product=calcium-dependent protein kinase CDPK1 | location=TGGT1_chrIV:2366836-2372193(+) | protein_length=582 | sequence_SO=chromosome | SO=protein_coding | is_pseudo=false	TGGT1_301440-t26_1-p1	65 kDa	0.999989	17	0.88	118966100	6114282	95927400	0.0083	0.0047	0.41
TRUE	Empty	TGGT1_211690-t26_1-p1 | transcript=TGGT1_211690-t26_1 | gene=TGGT1_211690 | organism=Toxoplasma_gondii_GT1 | gene_product=AAA family protein | transcript_product=AAA family protein | location=TGGT1_chrIV:1531700-1551811(-) | protein_length=1538 | sequence_SO=chromosome | SO=protein_coding | is_pseudo=false	TGGT1_211690-t26_1-p1	167 kDa	0.999938	17	1	13918180	12600410	15579450	0.21	0.57	0.56
TRUE	Empty	TGGT1_204310-t26_1-p1 | transcript=TGGT1_204310-t26_1 | gene=TGGT1_204310 | organism=Toxoplasma_gondii_GT1 | gene_product=hypothetical protein | transcript_product=hypothetical protein | location=TGGT1_chrVIIa:1788678-1809780(+) | protein_length=2209 | sequence_SO=chromosome | SO=protein_coding | is_pseudo=false	TGGT1_204310-t26_1-p1	242 kDa	0.999924	17	1	4791199	4885677	5185650	0.67	0.85	0.63
TRUE	Empty	TGGT1_280610-t26_1-p1 | transcript=TGGT1_280610-t26_1 | gene=TGGT1_280610 | organism=Toxoplasma_gondii_GT1 | gene_product=signal recognition particle receptor alpha subunit | transcript_product=signal recognition particle receptor alpha subunit | location=TGGT1_chrVIIa:237626-244988(+) | protein_length=556 | sequence_SO=chromosome | SO=protein_coding | is_pseudo=false	TGGT1_280610-t26_1-p1	61 kDa	0.999893	17	1	10981260	11252960	11649420	0.64	0.88	0.7
TRUE	Empty	TGGT1_248810-t26_1-p1 | transcript=TGGT1_248810-t26_1 | gene=TGGT1_248810 | organism=Toxoplasma_gondii_GT1 | gene_product=nuclear factor NF7 | transcript_product=nuclear factor NF7 | location=TGGT1_chrXII:4119880-4123828(+) | protein_length=497 | sequence_SO=chromosome | SO=protein_coding | is_pseudo=false	TGGT1_248810-t26_1-p1	54 kDa	0.999869	17	1	17367130	16470260	16494950	1	0.62	0.86
TRUE	Empty	TGGT1_294710-t26_1-p1 | transcript=TGGT1_294710-t26_1 | gene=TGGT1_294710 | organism=Toxoplasma_gondii_GT1 | gene_product=RNA recognition motif-containing protein | transcript_product=RNA recognition motif-containing protein | location=TGGT1_chrIa:1067961-1074404(-) | protein_length=1151 | sequence_SO=chromosome | SO=protein_coding | is_pseudo=false	TGGT1_294710-t26_1-p1	122 kDa	0.999869	17	1	9866076	10690180	9973092	0.83	0.62	0.97
TRUE	Empty	TGGT1_258870A-t26_1-p1 | transcript=TGGT1_258870A-t26_1 | gene=TGGT1_258870A | organism=Toxoplasma_gondii_GT1 | gene_product=hypothetical protein | transcript_product=hypothetical protein | location=TGGT1_chrVIIb:3082018-3084228(-) | protein_length=557 | sequence_SO=chromosome | SO=protein_coding | is_pseudo=false	TGGT1_258870A-t26_1-p1	61 kDa	0.999804	16	0.5	8958557	8323596	8450878	0.32	0.11	0.14
TRUE	Empty	TGGT1_312110-t26_1-p1 | transcript=TGGT1_312110-t26_1 | gene=TGGT1_312110 | organism=Toxoplasma_gondii_GT1 | gene_product=apicoplast-associated thioredoxin family protein Atrx1 | transcript_product=apicoplast-associated thioredoxin family protein Atrx1 | location=TGGT1_chrXI:2396639-2404968(-) | protein_length=790 | sequence_SO=chromosome | SO=protein_coding | is_pseudo=false	TGGT1_312110-t26_1-p1	87 kDa	0.999773	17	1	26577360	26817430	26338060	0.36	0.94	0.94
TRUE	Empty	TGGT1_411430-t26_1-p1 | transcript=TGGT1_411430-t26_1 | gene=TGGT1_411430 | organism=Toxoplasma_gondii_GT1 | gene_product=rhoptry protein ROP5 | transcript_product=rhoptry protein ROP5 | location=AAQM03000489:189-1624(+) | protein_length=461 | sequence_SO=contig | SO=protein_coding | is_pseudo=false	TGGT1_411430-t26_1-p1	52 kDa	0.99976	16	0.25	5632027	6962471	5037435	0.08	0.12	0.32
TRUE	Empty	TGGT1_314780-t26_1-p1 | transcript=TGGT1_314780-t26_1 | gene=TGGT1_314780 | organism=Toxoplasma_gondii_GT1 | gene_product=myosin G | transcript_product=myosin G | location=TGGT1_chrXI:4226752-4246422(-) | protein_length=2059 | sequence_SO=chromosome | SO=protein_coding | is_pseudo=false	TGGT1_314780-t26_1-p1	227 kDa	0.999672	17	1	1144238	1286307	1354184	0.8	0.37	0.44
TRUE	Empty	TGGT1_289380-t26_1-p1 | transcript=TGGT1_289380-t26_1 | gene=TGGT1_289380 | organism=Toxoplasma_gondii_GT1 | gene_product=hypothetical protein | transcript_product=hypothetical protein | location=TGGT1_chrIX:3052104-3057458(+) | protein_length=921 | sequence_SO=chromosome | SO=protein_coding | is_pseudo=false	TGGT1_289380-t26_1-p1	100 kDa	0.999578	17	0.94	2324988	3272195	2661363	0.54	0.18	0.71
TRUE	Empty	TGGT1_265110-t26_1-p1 | transcript=TGGT1_265110-t26_1 | gene=TGGT1_265110 | organism=Toxoplasma_gondii_GT1 | gene_product=putative ribosome biogenesis protein | transcript_product=putative ribosome biogenesis protein | location=TGGT1_chrIX:1578932-1586530(+) | protein_length=1060 | sequence_SO=chromosome | SO=protein_coding | is_pseudo=false	TGGT1_265110-t26_1-p1	118 kDa	0.999556	17	1	4099024	4616829	4992395	0.81	0.62	0.52
TRUE	Empty	TGGT1_205040-t26_1-p1 | transcript=TGGT1_205040-t26_1 | gene=TGGT1_205040 | organism=Toxoplasma_gondii_GT1 | gene_product=PGAP1 family protein | transcript_product=PGAP1 family protein | location=TGGT1_chrVIIa:1568087-1575644(-) | protein_length=2110 | sequence_SO=chromosome | SO=protein_coding | is_pseudo=false	TGGT1_205040-t26_1-p1	228 kDa	0.999538	17	1	6185851	5561416	6220573	0.23	0.54	0.97
TRUE	Empty	TGGT1_293730-t26_1-p1 | transcript=TGGT1_293730-t26_1 | gene=TGGT1_293730 | organism=Toxoplasma_gondii_GT1 | gene_product=DHHC zinc finger domain-containing protein | transcript_product=DHHC zinc finger domain-containing protein | location=TGGT1_chrIa:515727-523991(+) | protein_length=971 | sequence_SO=chromosome | SO=protein_coding | is_pseudo=false	TGGT1_293730-t26_1-p1	107 kDa	0.999481	17	1	5710665	5356391	5021609	0.56	0.66	0.42
TRUE	Empty	TGGT1_258826-t26_1-p1 | transcript=TGGT1_258826-t26_1 | gene=TGGT1_258826 | organism=Toxoplasma_gondii_GT1 | gene_product=hypothetical protein | transcript_product=hypothetical protein | location=TGGT1_chrVIIb:3128141-3131185(+) | protein_length=1014 | sequence_SO=chromosome | SO=protein_coding | is_pseudo=false	TGGT1_258826-t26_1-p1	112 kDa	0.999438	17	1	18676630	17745330	19414450	0.22	0.65	0.75
TRUE	Empty	TGGT1_254300-t26_1-p1 | transcript=TGGT1_254300-t26_1 | gene=TGGT1_254300 | organism=Toxoplasma_gondii_GT1 | gene_product=hypothetical protein | transcript_product=hypothetical protein | location=TGGT1_chrIII:1566444-1577118(+) | protein_length=1776 | sequence_SO=chromosome | SO=protein_coding | is_pseudo=false	TGGT1_254300-t26_1-p1	196 kDa	0.999164	17	0.94	1577112	1437550	4339257	0.33	0.64	0.37
TRUE	Empty	TGGT1_277720-t26_1-p1 | transcript=TGGT1_277720-t26_1 | gene=TGGT1_277720 | organism=Toxoplasma_gondii_GT1 | gene_product=GDA1/CD39 (nucleoside phosphatase) family protein | transcript_product=GDA1/CD39 (nucleoside phosphatase) family protein | location=TGGT1_chrXII:6466417-6468990(+) | protein_length=857 | sequence_SO=chromosome | SO=protein_coding | is_pseudo=false	TGGT1_277720-t26_1-p1	93 kDa	0.998858	17	1	6552301	7893753	5465200	0.079	0.38	0.33
TRUE	Empty	TGGT1_254690-t26_1-p1 | transcript=TGGT1_254690-t26_1 | gene=TGGT1_254690 | organism=Toxoplasma_gondii_GT1 | gene_product=phospholipase/carboxylesterase | transcript_product=phospholipase/carboxylesterase | location=TGGT1_chrIII:1864196-1866935(+) | protein_length=497 | sequence_SO=chromosome | SO=protein_coding | is_pseudo=false	TGGT1_254690-t26_1-p1	54 kDa	0.998667	17	1	18525290	17360950	18872450	0.36	0.73	0.92
TRUE	Empty	TGGT1_225200-t26_1-p1 | transcript=TGGT1_225200-t26_1 | gene=TGGT1_225200 | organism=Toxoplasma_gondii_GT1 | gene_product=hypothetical protein | transcript_product=hypothetical protein | location=TGGT1_chrX:2317721-2342258(+) | protein_length=1445 | sequence_SO=chromosome | SO=protein_coding | is_pseudo=false	TGGT1_225200-t26_1-p1	158 kDa	0.998259	17	1	2416874	2746284	2695955	0.94	0.48	0.62
TRUE	Empty	TGGT1_270840-t26_1-p1 | transcript=TGGT1_270840-t26_1 | gene=TGGT1_270840 | organism=Toxoplasma_gondii_GT1 | gene_product=poly(ADP-ribose) polymerase catalytic domain-containing protein | transcript_product=poly(ADP-ribose) polymerase catalytic domain-containing protein | location=TGGT1_chrVIII:4946767-4963422(+) | protein_length=1012 | sequence_SO=chromosome | SO=protein_coding | is_pseudo=false	TGGT1_270840-t26_1-p1	113 kDa	0.998161	17	1	7190689	6195401	9963242	0.033	0.22	0.078
TRUE	Empty	TGGT1_244470-t26_1-p1 | transcript=TGGT1_244470-t26_1 | gene=TGGT1_244470 | organism=Toxoplasma_gondii_GT1 | gene_product=hypothetical protein | transcript_product=hypothetical protein | location=TGGT1_chrVI:3203997-3215302(-) | protein_length=2595 | sequence_SO=chromosome | SO=protein_coding | is_pseudo=false	TGGT1_244470-t26_1-p1	290 kDa	0.997753	17	1	3239376	2531364	2953869	0.69	0.61	0.87
TRUE	Empty	TGGT1_273870-t26_1-p1 | transcript=TGGT1_273870-t26_1 | gene=TGGT1_273870 | organism=Toxoplasma_gondii_GT1 | gene_product=SWI2/SNF2 ISWI-like (AT hook) | transcript_product=SWI2/SNF2 ISWI-like (AT hook) | location=TGGT1_chrVIII:3198884-3213308(+) | protein_length=1556 | sequence_SO=chromosome | SO=protein_coding | is_pseudo=false	TGGT1_273870-t26_1-p1	175 kDa	0.996804	17	1	3992509	4619466	4266883	0.11	0.065	0.2
TRUE	Empty	TGGT1_297800-t26_1-p1 | transcript=TGGT1_297800-t26_1 | gene=TGGT1_297800 | organism=Toxoplasma_gondii_GT1 | gene_product=RecF/RecN/SMC N terminal domain-containing protein | transcript_product=RecF/RecN/SMC N terminal domain-containing protein | location=TGGT1_chrII:1983196-2001446(-) | protein_length=1225 | sequence_SO=chromosome | SO=protein_coding | is_pseudo=false	TGGT1_297800-t26_1-p1	139 kDa	0.994445	17	1	2437924	2306901	3139486	0.0043	0.8	0.32
TRUE	Empty	TGGT1_288650-t26_1-p1 | transcript=TGGT1_288650-t26_1 | gene=TGGT1_288650 | organism=Toxoplasma_gondii_GT1 | gene_product=dense granule protein GRA12 | transcript_product=dense granule protein GRA12 | location=TGGT1_chrIX:2467879-2469672(-) | protein_length=436 | sequence_SO=chromosome | SO=protein_coding | is_pseudo=false	TGGT1_288650-t26_1-p1	48 kDa	1	15	1	301788700	287244700	262544400	0.061	0.77	0.46
TRUE	Empty	TGGT1_308810B-t26_1-p1 | transcript=TGGT1_308810B-t26_1 | gene=TGGT1_308810B | organism=Toxoplasma_gondii_GT1 | gene_product=rhoptry neck protein RON9 | transcript_product=rhoptry neck protein RON9 | location=TGGT1_chrXI:240636-248425(+) | protein_length=1086 | sequence_SO=chromosome | SO=protein_coding | is_pseudo=false	TGGT1_308810B-t26_1-p1	115 kDa	0.999996	16	1	4586908	5793645	3741874	0.1	0.36	0.26
TRUE	Empty	TGGT1_311240-t26_1-p1 | transcript=TGGT1_311240-t26_1 | gene=TGGT1_311240 | organism=Toxoplasma_gondii_GT1 | gene_product=putative DnaJ family chaperone | transcript_product=putative DnaJ family chaperone | location=TGGT1_chrXI:1865804-1870827(-) | protein_length=426 | sequence_SO=chromosome | SO=protein_coding | is_pseudo=false	TGGT1_311240-t26_1-p1	47 kDa	0.999996	16	0.94	24923490	20379100	32624590	0.23	0.24	0.38
TRUE	Empty	TGGT1_309120-t26_1-p1 | transcript=TGGT1_309120-t26_1 | gene=TGGT1_309120 | organism=Toxoplasma_gondii_GT1 | gene_product=ribosomal protein RPL4 | transcript_product=ribosomal protein RPL4 | location=TGGT1_chrXI:476484-477734(-) | protein_length=416 | sequence_SO=chromosome | SO=protein_coding | is_pseudo=false	TGGT1_309120-t26_1-p1	46 kDa	0.999996	15	1	25279760	29649560	28357020	0.82	0.33	0.63
TRUE	Empty	TGGT1_229480-t26_1-p1 | transcript=TGGT1_229480-t26_1 | gene=TGGT1_229480 | organism=Toxoplasma_gondii_GT1 | gene_product=putative calcium binding protein precursor | transcript_product=putative calcium binding protein precursor | location=TGGT1_chrVIII:289042-291582(-) | protein_length=335 | sequence_SO=chromosome | SO=protein_coding | is_pseudo=false	TGGT1_229480-t26_1-p1	38 kDa	0.999993	15	1	52540970	59357510	67771790	0.4	0.66	0.43
TRUE	Empty	TGGT1_205510-t26_1-p1 | transcript=TGGT1_205510-t26_1 | gene=TGGT1_205510 | organism=Toxoplasma_gondii_GT1 | gene_product=putative nucleolar protein 5 | transcript_product=putative nucleolar protein 5 | location=TGGT1_chrVIIa:1272709-1276843(-) | protein_length=490 | sequence_SO=chromosome | SO=protein_coding | is_pseudo=false	TGGT1_205510-t26_1-p1	54 kDa	0.999991	16	1	7747849	7814221	8127517	0.89	0.98	0.91
TRUE	Empty	TGGT1_294610-t26_1-p1 | transcript=TGGT1_294610-t26_1 | gene=TGGT1_294610 | organism=Toxoplasma_gondii_GT1 | gene_product=putative histone lysine methyltransferase, SET | transcript_product=putative histone lysine methyltransferase, SET | location=TGGT1_chrIa:979977-985190(-) | protein_length=1737 | sequence_SO=chromosome | SO=protein_coding | is_pseudo=false	TGGT1_294610-t26_1-p1	190 kDa	0.999907	16	1	1580366	2201826	1577725	0.022	0.019	0.94
TRUE	Empty	TGGT1_222220-t26_1-p1 | transcript=TGGT1_222220-t26_1 | gene=TGGT1_222220 | organism=Toxoplasma_gondii_GT1 | gene_product=alveolin domain containing intermediate filament IMC7 | transcript_product=alveolin domain containing intermediate filament IMC7 | location=TGGT1_chrII:949239-952716(+) | protein_length=429 | sequence_SO=chromosome | SO=protein_coding | is_pseudo=false	TGGT1_222220-t26_1-p1	47 kDa	0.999906	15	1	24411080	23433330	20866470	0.74	0.74	0.64
TRUE	Empty	TGGT1_207720-t26_1-p1 | transcript=TGGT1_207720-t26_1 | gene=TGGT1_207720 | organism=Toxoplasma_gondii_GT1 | gene_product=hypothetical protein | transcript_product=hypothetical protein | location=TGGT1_chrIb:247992-259807(+) | protein_length=1628 | sequence_SO=chromosome | SO=protein_coding | is_pseudo=false	TGGT1_207720-t26_1-p1	177 kDa	0.999904	16	0.94	2787447	2550413	2560677	0.99	0.61	0.78
TRUE	Empty	TGGT1_269885B-t26_1-p1 | transcript=TGGT1_269885B-t26_1 | gene=TGGT1_269885B | organism=Toxoplasma_gondii_GT1 | gene_product=rhoptry metalloprotease toxolysin TLN1 | transcript_product=rhoptry metalloprotease toxolysin TLN1 | location=TGGT1_chrVIII:5568343-5570523(+) | protein_length=558 | sequence_SO=chromosome | SO=protein_coding | is_pseudo=false	TGGT1_269885B-t26_1-p1	62 kDa	0.999873	16	0.56	7107455	7712423	6079153	0.15	0.39	0.19
TRUE	Empty	TGGT1_315770-t26_1-p1 | transcript=TGGT1_315770-t26_1 | gene=TGGT1_315770 | organism=Toxoplasma_gondii_GT1 | gene_product=cytochrome p450 superfamily protein | transcript_product=cytochrome p450 superfamily protein | location=TGGT1_chrXI:4913385-4919784(-) | protein_length=553 | sequence_SO=chromosome | SO=protein_coding | is_pseudo=false	TGGT1_315770-t26_1-p1	63 kDa	0.999852	15	1	21263880	24338450	16758850	0.03	0.27	0.16
TRUE	Empty	TGGT1_205740-t26_1-p1 | transcript=TGGT1_205740-t26_1 | gene=TGGT1_205740 | organism=Toxoplasma_gondii_GT1 | gene_product=hypothetical protein | transcript_product=hypothetical protein | location=TGGT1_chrVIIa:1092345-1104968(-) | protein_length=1306 | sequence_SO=chromosome | SO=protein_coding | is_pseudo=false	TGGT1_205740-t26_1-p1	141 kDa	0.999827	16	1	12403080	11510300	12866000	0.33	0.48	0.79
TRUE	Empty	TGGT1_240650-t26_1-p1 | transcript=TGGT1_240650-t26_1 | gene=TGGT1_240650 | organism=Toxoplasma_gondii_GT1 | gene_product=putative coatomer protein complex, subunit alpha | transcript_product=putative coatomer protein complex, subunit alpha | location=TGGT1_chrVI:1326973-1343296(-) | protein_length=1300 | sequence_SO=chromosome | SO=protein_coding | is_pseudo=false	TGGT1_240650-t26_1-p1	143 kDa	0.999822	16	1	2057682	1603182	1485824	0.75	0.018	0.26
TRUE	Empty	TGGT1_243460-t26_1-p1 | transcript=TGGT1_243460-t26_1 | gene=TGGT1_243460 | organism=Toxoplasma_gondii_GT1 | gene_product=hypothetical protein | transcript_product=hypothetical protein | location=TGGT1_chrVI:2564580-2571836(-) | protein_length=2011 | sequence_SO=chromosome | SO=protein_coding | is_pseudo=false	TGGT1_243460-t26_1-p1	210 kDa	0.999764	16	1	9118277	5893423	8478909	0.035	0.044	0.41
TRUE	Empty	TGGT1_311210-t26_1-p1 | transcript=TGGT1_311210-t26_1 | gene=TGGT1_311210 | organism=Toxoplasma_gondii_GT1 | gene_product=hypothetical protein | transcript_product=hypothetical protein | location=TGGT1_chrXI:1821719-1832040(+) | protein_length=1817 | sequence_SO=chromosome | SO=protein_coding | is_pseudo=false	TGGT1_311210-t26_1-p1	192 kDa	0.999618	16	1	5443144	6114940	5657897	0.34	0.62	0.86
TRUE	Empty	TGGT1_309600-t26_1-p1 | transcript=TGGT1_309600-t26_1 | gene=TGGT1_309600 | organism=Toxoplasma_gondii_GT1 | gene_product=hypothetical protein | transcript_product=hypothetical protein | location=TGGT1_chrXI:713110-720853(+) | protein_length=960 | sequence_SO=chromosome | SO=protein_coding | is_pseudo=false	TGGT1_309600-t26_1-p1	107 kDa	0.999548	16	1	9392355	10032820	8111942	0.14	0.66	0.28
TRUE	Empty	TGGT1_214750-t26_1-p1 | transcript=TGGT1_214750-t26_1 | gene=TGGT1_214750 | organism=Toxoplasma_gondii_GT1 | gene_product=hypothetical protein | transcript_product=hypothetical protein | location=TGGT1_chrX:6356533-6365733(-) | protein_length=1108 | sequence_SO=chromosome | SO=protein_coding | is_pseudo=false	TGGT1_214750-t26_1-p1	120 kDa	0.999236	16	1	6095862	6975058	7025054	0.94	0.54	0.48
TRUE	Empty	TGGT1_292950-t26_1-p1 | transcript=TGGT1_292950-t26_1 | gene=TGGT1_292950 | organism=Toxoplasma_gondii_GT1 | gene_product=hypothetical protein | transcript_product=hypothetical protein | location=TGGT1_chrIa:22336-28275(-) | protein_length=1979 | sequence_SO=chromosome | SO=protein_coding | is_pseudo=false	TGGT1_292950-t26_1-p1	211 kDa	0.998947	16	1	2252043	2455336	2055517	0.042	0.55	0.54
TRUE	Empty	TGGT1_243730-t26_1-p1 | transcript=TGGT1_243730-t26_1 | gene=TGGT1_243730 | organism=Toxoplasma_gondii_GT1 | gene_product=rhoptry protein ROP9 | transcript_product=rhoptry protein ROP9 | location=TGGT1_chrVI:2733555-2736099(+) | protein_length=353 | sequence_SO=chromosome | SO=protein_coding | is_pseudo=false	TGGT1_243730-t26_1-p1	38 kDa	0.998281	16	1	56956050	73470450	50156240	0.049	0.43	0.66
TRUE	Empty	TGGT1_321620-t26_1-p1 | transcript=TGGT1_321620-t26_1 | gene=TGGT1_321620 | organism=Toxoplasma_gondii_GT1 | gene_product=dynamin-related protein DRPB | transcript_product=dynamin-related protein DRPB | location=TGGT1_chrIb:1696372-1706596(+) | protein_length=860 | sequence_SO=chromosome | SO=protein_coding | is_pseudo=false	TGGT1_321620-t26_1-p1	96 kDa	0.998213	16	1	4515898	3837895	3594996	0.67	0.56	0.38
TRUE	Empty	TGGT1_301270-t26_1-p1 | transcript=TGGT1_301270-t26_1 | gene=TGGT1_301270 | organism=Toxoplasma_gondii_GT1 | gene_product=Tyrosine kinase-like (TKL) protein | transcript_product=Tyrosine kinase-like (TKL) protein | location=TGGT1_chrIV:2241797-2257616(+) | protein_length=3569 | sequence_SO=chromosome | SO=protein_coding | is_pseudo=false	TGGT1_301270-t26_1-p1	386 kDa	0.9981	16	1	1983394	2322998	1717764	0.34	0.57	0.67
TRUE	Empty	TGGT1_216210-t26_1-p1 | transcript=TGGT1_216210-t26_1 | gene=TGGT1_216210 | organism=Toxoplasma_gondii_GT1 | gene_product=hypothetical protein | transcript_product=hypothetical protein | location=TGGT1_chrXI:6240177-6264090(+) | protein_length=5565 | sequence_SO=chromosome | SO=protein_coding | is_pseudo=false	TGGT1_216210-t26_1-p1	604 kDa	0.995613	16	1	1124523	1162960	935936	0.38	0.82	0.5
TRUE	Empty	TGGT1_315140-t26_1-p1 | transcript=TGGT1_315140-t26_1 | gene=TGGT1_315140 | organism=Toxoplasma_gondii_GT1 | gene_product=WD domain, G-beta repeat-containing protein | transcript_product=WD domain, G-beta repeat-containing protein | location=TGGT1_chrXI:4459459-4466175(-) | protein_length=1462 | sequence_SO=chromosome | SO=protein_coding | is_pseudo=false	TGGT1_315140-t26_1-p1	155 kDa	0.991755	16	1	772458	777362	1187234	0.43	0.99	0.48
TRUE	Empty	TGGT1_289580-t26_1-p1 | transcript=TGGT1_289580-t26_1 | gene=TGGT1_289580 | organism=Toxoplasma_gondii_GT1 | gene_product=strictosidine synthase subfamily protein | transcript_product=strictosidine synthase subfamily protein | location=TGGT1_chrIX:3140429-3145862(-) | protein_length=456 | sequence_SO=chromosome | SO=protein_coding | is_pseudo=false	TGGT1_289580-t26_1-p1	49 kDa	0.999983	15	1	29065800	26391960	28720180	0.23	0.62	0.95
TRUE	Empty	TGGT1_233520-t26_1-p1 | transcript=TGGT1_233520-t26_1 | gene=TGGT1_233520 | organism=Toxoplasma_gondii_GT1 | gene_product=ATP-dependent RNA helicase | transcript_product=ATP-dependent RNA helicase | location=TGGT1_chrVIII:2686087-2689735(+) | protein_length=801 | sequence_SO=chromosome | SO=protein_coding | is_pseudo=false	TGGT1_233520-t26_1-p1	89 kDa	0.999981	15	0.93	2247180	2377166	2261948	0.82	0.9	0.99
TRUE	Empty	TGGT1_201780-t26_1-p1 | transcript=TGGT1_201780-t26_1 | gene=TGGT1_201780 | organism=Toxoplasma_gondii_GT1 | gene_product=microneme protein MIC2 | transcript_product=microneme protein MIC2 | location=TGGT1_chrVIIa:3693727-3696991(-) | protein_length=769 | sequence_SO=chromosome | SO=protein_coding | is_pseudo=false	TGGT1_201780-t26_1-p1	83 kDa	0.999951	14	1	35307530	40537930	29059320	0.012	0.52	0.39
TRUE	Empty	TGGT1_267330-t26_1-p1 | transcript=TGGT1_267330-t26_1 | gene=TGGT1_267330 | organism=Toxoplasma_gondii_GT1 | gene_product=fumarate hydratase | transcript_product=fumarate hydratase | location=TGGT1_chrIX:545528-551285(+) | protein_length=775 | sequence_SO=chromosome | SO=protein_coding | is_pseudo=false	TGGT1_267330-t26_1-p1	84 kDa	0.999951	15	1	10353730	11321950	8410390	0.39	0.59	0.51
TRUE	Empty	TGGT1_236650-t26_1-p1 | transcript=TGGT1_236650-t26_1 | gene=TGGT1_236650 | organism=Toxoplasma_gondii_GT1 | gene_product=DEAD (Asp-Glu-Ala-Asp) box polypeptide 17 | transcript_product=DEAD (Asp-Glu-Ala-Asp) box polypeptide 17 | location=TGGT1_chrX:5362273-5365892(-) | protein_length=550 | sequence_SO=chromosome | SO=protein_coding | is_pseudo=false	TGGT1_236650-t26_1-p1	60 kDa	0.999947	15	1	43031000	40885010	49952680	0.44	0.84	0.42
TRUE	Empty	TGGT1_204130-t26_1-p1 | transcript=TGGT1_204130-t26_1 | gene=TGGT1_204130 | organism=Toxoplasma_gondii_GT1 | gene_product=perforin-like protein PLP1 | transcript_product=perforin-like protein PLP1 | location=TGGT1_chrVIIa:1864038-1872889(-) | protein_length=1161 | sequence_SO=chromosome | SO=protein_coding | is_pseudo=false	TGGT1_204130-t26_1-p1	125 kDa	0.99994	15	1	7150223	8502233	5684897	0.037	0.45	0.36
TRUE	Empty	TGGT1_319560-t26_1-p1 | transcript=TGGT1_319560-t26_1 | gene=TGGT1_319560 | organism=Toxoplasma_gondii_GT1 | gene_product=microneme protein MIC3 | transcript_product=microneme protein MIC3 | location=TGGT1_chrIV:856315-857588(+) | protein_length=383 | sequence_SO=chromosome | SO=protein_coding | is_pseudo=false	TGGT1_319560-t26_1-p1	41 kDa	0.999923	15	1	95213750	111245800	80373030	0.11	0.41	0.21
TRUE	Empty	TGGT1_284190-t26_1-p1 | transcript=TGGT1_284190-t26_1 | gene=TGGT1_284190 | organism=Toxoplasma_gondii_GT1 | gene_product=pyruvate carboxylase | transcript_product=pyruvate carboxylase | location=TGGT1_chrV:2598993-2613633(-) | protein_length=1391 | sequence_SO=chromosome | SO=protein_coding | is_pseudo=false	TGGT1_284190-t26_1-p1	152 kDa	0.999914	14	1	2740585	4661316	5960031	0.82	0.0055	0.5
TRUE	Empty	TGGT1_251630-t26_1-p1 | transcript=TGGT1_251630-t26_1 | gene=TGGT1_251630 | organism=Toxoplasma_gondii_GT1 | gene_product=slc30a2 protein | transcript_product=slc30a2 protein | location=TGGT1_chrXII:5421720-5427109(+) | protein_length=896 | sequence_SO=chromosome | SO=protein_coding | is_pseudo=false	TGGT1_251630-t26_1-p1	97 kDa	0.999879	15	1	6494315	6666521	6716141	0.89	0.8	0.74
TRUE	Empty	TGGT1_201140-t26_1-p1 | transcript=TGGT1_201140-t26_1 | gene=TGGT1_201140 | organism=Toxoplasma_gondii_GT1 | gene_product=hypothetical protein | transcript_product=hypothetical protein | location=TGGT1_chrVIIa:3909741-3917284(+) | protein_length=1051 | sequence_SO=chromosome | SO=protein_coding | is_pseudo=false	TGGT1_201140-t26_1-p1	114 kDa	0.999871	15	1	10770250	10975980	12204140	0.13	0.93	0.57
TRUE	Empty	TGGT1_244380-t26_1-p1 | transcript=TGGT1_244380-t26_1 | gene=TGGT1_244380 | organism=Toxoplasma_gondii_GT1 | gene_product=cactin | transcript_product=cactin | location=TGGT1_chrVI:3137734-3142670(-) | protein_length=688 | sequence_SO=chromosome | SO=protein_coding | is_pseudo=false	TGGT1_244380-t26_1-p1	80 kDa	0.999818	15	1	19701030	16997010	25683240	0.072	0.026	0.16
TRUE	Empty	TGGT1_250770-t26_1-p1 | transcript=TGGT1_250770-t26_1 | gene=TGGT1_250770 | organism=Toxoplasma_gondii_GT1 | gene_product=putative eukaryotic initiation factor-4A | transcript_product=putative eukaryotic initiation factor-4A | location=TGGT1_chrXII:5123731-5125767(-) | protein_length=412 | sequence_SO=chromosome | SO=protein_coding | is_pseudo=false	TGGT1_250770-t26_1-p1	47 kDa	0.999763	15	1	13055480	11764500	10493030	0.75	0.77	0.075
TRUE	Empty	TGGT1_269690-t26_1-p1 | transcript=TGGT1_269690-t26_1 | gene=TGGT1_269690 | organism=Toxoplasma_gondii_GT1 | gene_product=hypothetical protein | transcript_product=hypothetical protein | location=TGGT1_chrVIII:5679281-5681878(+) | protein_length=865 | sequence_SO=chromosome | SO=protein_coding | is_pseudo=false	TGGT1_269690-t26_1-p1	94 kDa	0.999712	15	1	11497720	18368120	12284150	0.17	0.094	0.79
TRUE	Empty	TGGT1_306400-t26_1-p1 | transcript=TGGT1_306400-t26_1 | gene=TGGT1_306400 | organism=Toxoplasma_gondii_GT1 | gene_product=hypothetical protein | transcript_product=hypothetical protein | location=TGGT1_chrIX:5832391-5837378(+) | protein_length=1403 | sequence_SO=chromosome | SO=protein_coding | is_pseudo=false	TGGT1_306400-t26_1-p1	152 kDa	0.999631	15	1	3237189	3015360	3257898	0.52	0.62	0.97
TRUE	Empty	TGGT1_360830-t26_1-p1 | transcript=TGGT1_360830-t26_1 | gene=TGGT1_360830 | organism=Toxoplasma_gondii_GT1 | gene_product=nucleoside-triphosphatase | transcript_product=nucleoside-triphosphatase | location=AAQM03000066:41-1153(+) | protein_length=370 | sequence_SO=contig | SO=protein_coding | is_pseudo=false	TGGT1_360830-t26_1-p1	41 kDa	0.999572	15	0.33	6964115	7739925	5442577	0.00023	0.68	0.39
TRUE	Empty	TGGT1_256980-t26_1-p1 | transcript=TGGT1_256980-t26_1 | gene=TGGT1_256980 | organism=Toxoplasma_gondii_GT1 | gene_product=glycerol-3-phosphate-acyltransferase | transcript_product=glycerol-3-phosphate-acyltransferase | location=TGGT1_chrVIIb:4232332-4243743(-) | protein_length=1002 | sequence_SO=chromosome | SO=protein_coding | is_pseudo=false	TGGT1_256980-t26_1-p1	110 kDa	0.999568	15	1	3223053	3247756	3037483	0.23	0.97	0.76
TRUE	Empty	TGGT1_289880-t26_1-p1 | transcript=TGGT1_289880-t26_1 | gene=TGGT1_289880 | organism=Toxoplasma_gondii_GT1 | gene_product=hypothetical protein | transcript_product=hypothetical protein | location=TGGT1_chrIX:3301494-3313288(-) | protein_length=1326 | sequence_SO=chromosome | SO=protein_coding | is_pseudo=false	TGGT1_289880-t26_1-p1	148 kDa	0.999553	15	1	2575186	2825558	2292023	0.059	0.41	0.25
TRUE	Empty	TGGT1_249900-t26_1-p1 | transcript=TGGT1_249900-t26_1 | gene=TGGT1_249900 | organism=Toxoplasma_gondii_GT1 | gene_product=putative adenine nucleotide translocator | transcript_product=putative adenine nucleotide translocator | location=TGGT1_chrXII:4873424-4874380(+) | protein_length=318 | sequence_SO=chromosome | SO=protein_coding | is_pseudo=false	TGGT1_249900-t26_1-p1	35 kDa	0.999546	14	1	57308720	57211650	48163950	0.08	0.97	0.1
TRUE	Empty	TGGT1_263520-t26_1-p1 | transcript=TGGT1_263520-t26_1 | gene=TGGT1_263520 | organism=Toxoplasma_gondii_GT1 | gene_product=microtubule associated protein SPM1 | transcript_product=microtubule associated protein SPM1 | location=TGGT1_chrVIIb:473105-475119(+) | protein_length=351 | sequence_SO=chromosome | SO=protein_coding | is_pseudo=false	TGGT1_263520-t26_1-p1	39 kDa	0.999327	15	1	9608899	11060280	7449548	0.12	0.46	0.0048
TRUE	Empty	TGGT1_313080-t26_1-p1 | transcript=TGGT1_313080-t26_1 | gene=TGGT1_313080 | organism=Toxoplasma_gondii_GT1 | gene_product=hypothetical protein | transcript_product=hypothetical protein | location=TGGT1_chrXI:3049384-3050751(-) | protein_length=455 | sequence_SO=chromosome | SO=protein_coding | is_pseudo=false	TGGT1_313080-t26_1-p1	50 kDa	0.999214	14	1	34196590	31684500	34026210	0.47	0.53	0.95
TRUE	Empty	TGGT1_321650-t26_1-p1 | transcript=TGGT1_321650-t26_1 | gene=TGGT1_321650 | organism=Toxoplasma_gondii_GT1 | gene_product=hypothetical protein | transcript_product=hypothetical protein | location=TGGT1_chrIb:1657484-1670398(+) | protein_length=1375 | sequence_SO=chromosome | SO=protein_coding | is_pseudo=false	TGGT1_321650-t26_1-p1	154 kDa	0.999183	15	1	6080548	7020458	5119669	0.093	0.31	0.34
TRUE	Empty	TGGT1_279100-t26_1-p1 | transcript=TGGT1_279100-t26_1 | gene=TGGT1_279100 | organism=Toxoplasma_gondii_GT1 | gene_product=hypothetical protein | transcript_product=hypothetical protein | location=AAQM03000427:32-1883(+) | protein_length=435 | sequence_SO=contig | SO=protein_coding | is_pseudo=false	TGGT1_279100-t26_1-p1	48 kDa	0.99861	14	0.14	2148344	2307839	1941432	0.083	0.44	0.28
TRUE	Empty	TGGT1_295110-t26_1-p1 | transcript=TGGT1_295110-t26_1 | gene=TGGT1_295110 | organism=Toxoplasma_gondii_GT1 | gene_product=rhoptry protein ROP7 | transcript_product=rhoptry protein ROP7 | location=AAQM03000462:293-2020(-) | protein_length=575 | sequence_SO=contig | SO=protein_coding | is_pseudo=false	TGGT1_295110-t26_1-p1	63 kDa	0.998503	15	0.6	28381840	33650450	24394150	0.37	0.33	0.6
TRUE	Empty	TGGT1_209150-t26_1-p1 | transcript=TGGT1_209150-t26_1 | gene=TGGT1_209150 | organism=Toxoplasma_gondii_GT1 | gene_product=non-proton pumping type-II NADH dehydrogenase I | transcript_product=non-proton pumping type-II NADH dehydrogenase I | location=TGGT1_chrIb:1092807-1095489(+) | protein_length=618 | sequence_SO=chromosome | SO=protein_coding | is_pseudo=false	TGGT1_209150-t26_1-p1	67 kDa	0.998499	15	1	10469140	12606470	9684226	0.35	0.041	0.76
TRUE	Empty	TGGT1_206610-t26_1-p1 | transcript=TGGT1_206610-t26_1 | gene=TGGT1_206610 | organism=Toxoplasma_gondii_GT1 | gene_product=pyruvate dehydrogenase complex subunit PDH-E2 | transcript_product=pyruvate dehydrogenase complex subunit PDH-E2 | location=TGGT1_chrVIIa:755999-763930(-) | protein_length=929 | sequence_SO=chromosome | SO=protein_coding | is_pseudo=false	TGGT1_206610-t26_1-p1	97 kDa	0.998472	15	1	5569054	5851372	5448304	0.68	0.81	0.93
TRUE	Empty	TGGT1_229310-t26_1-p1 | transcript=TGGT1_229310-t26_1 | gene=TGGT1_229310 | organism=Toxoplasma_gondii_GT1 | gene_product=mediator complex subunit MED14 | transcript_product=mediator complex subunit MED14 | location=TGGT1_chrVIII:143392-161704(+) | protein_length=4345 | sequence_SO=chromosome | SO=protein_coding | is_pseudo=false	TGGT1_229310-t26_1-p1	464 kDa	0.998361	15	1	2678483	2979403	1972663	0.4	0.29	0.51
TRUE	Empty	TGGT1_246720-t26_1-p1 | transcript=TGGT1_246720-t26_1 | gene=TGGT1_246720 | organism=Toxoplasma_gondii_GT1 | gene_product=hypothetical protein | transcript_product=hypothetical protein | location=TGGT1_chrXII:2874731-2876239(+) | protein_length=502 | sequence_SO=chromosome | SO=protein_coding | is_pseudo=false	TGGT1_246720-t26_1-p1	56 kDa	0.998348	15	1	12499640	9643291	31588420	0.29	0.86	0.47
TRUE	Empty	TGGT1_248290-t26_1-p1 | transcript=TGGT1_248290-t26_1 | gene=TGGT1_248290 | organism=Toxoplasma_gondii_GT1 | gene_product=WD domain, G-beta repeat-containing protein | transcript_product=WD domain, G-beta repeat-containing protein | location=TGGT1_chrXII:3712991-3725587(+) | protein_length=3345 | sequence_SO=chromosome | SO=protein_coding | is_pseudo=false	TGGT1_248290-t26_1-p1	359 kDa	0.995661	15	1	1581680	1072404	1579903	0.29	0.4	1
TRUE	Empty	TGGT1_291890-t26_1-p1 | transcript=TGGT1_291890-t26_1 | gene=TGGT1_291890 | organism=Toxoplasma_gondii_GT1 | gene_product=microneme protein MIC1 | transcript_product=microneme protein MIC1 | location=TGGT1_chrIX:4200849-4203191(-) | protein_length=456 | sequence_SO=chromosome | SO=protein_coding | is_pseudo=false	TGGT1_291890-t26_1-p1	49 kDa	0.999995	14	1	89732650	103885000	73230210	0.00046	0.4	0.28
TRUE	Empty	TGGT1_204480-t26_1-p1 | transcript=TGGT1_204480-t26_1 | gene=TGGT1_204480 | organism=Toxoplasma_gondii_GT1 | gene_product=thioredoxin domain-containing protein | transcript_product=thioredoxin domain-containing protein | location=TGGT1_chrVIIa:1656821-1664723(-) | protein_length=659 | sequence_SO=chromosome | SO=protein_coding | is_pseudo=false	TGGT1_204480-t26_1-p1	72 kDa	0.999993	14	1	15230680	16059850	15972920	0.96	0.79	0.81
TRUE	Empty	TGGT1_258580-t26_1-p1 | transcript=TGGT1_258580-t26_1 | gene=TGGT1_258580 | organism=Toxoplasma_gondii_GT1 | gene_product=rhoptry protein ROP17 | transcript_product=rhoptry protein ROP17 | location=TGGT1_chrVIIb:3287362-3289188(-) | protein_length=608 | sequence_SO=chromosome | SO=protein_coding | is_pseudo=false	TGGT1_258580-t26_1-p1	69 kDa	0.999986	14	1	36063180	41108820	30204360	0.14	0.38	0.38
TRUE	Empty	TGGT1_213040-t26_1-p1 | transcript=TGGT1_213040-t26_1 | gene=TGGT1_213040 | organism=Toxoplasma_gondii_GT1 | gene_product=hypothetical protein | transcript_product=hypothetical protein | location=TGGT1_chrV:678396-686336(+) | protein_length=1824 | sequence_SO=chromosome | SO=protein_coding | is_pseudo=false	TGGT1_213040-t26_1-p1	197 kDa	0.999986	14	1	2628692	2632586	2717436	0.8	1	0.9
TRUE	Empty	TGGT1_294220-t26_1-p1 | transcript=TGGT1_294220-t26_1 | gene=TGGT1_294220 | organism=Toxoplasma_gondii_GT1 | gene_product=hypothetical protein | transcript_product=hypothetical protein | location=TGGT1_chrIa:704114-705925(-) | protein_length=603 | sequence_SO=chromosome | SO=protein_coding | is_pseudo=false	TGGT1_294220-t26_1-p1	62 kDa	0.99997	14	1	5406876	5332351	6343808	0.35	0.95	0.43
TRUE	Empty	TGGT1_263070-t26_1-p1 | transcript=TGGT1_263070-t26_1 | gene=TGGT1_263070 | organism=Toxoplasma_gondii_GT1 | gene_product=CMGC kinase, CK2 family | transcript_product=CMGC kinase, CK2 family | location=TGGT1_chrVIIb:801033-806072(+) | protein_length=539 | sequence_SO=chromosome | SO=protein_coding | is_pseudo=false	TGGT1_263070-t26_1-p1	60 kDa	0.999962	14	1	8036633	7748580	8623910	0.56	0.77	0.62
TRUE	Empty	TGGT1_308860-t26_1-p1 | transcript=TGGT1_308860-t26_1 | gene=TGGT1_308860 | organism=Toxoplasma_gondii_GT1 | gene_product=hypothetical protein | transcript_product=hypothetical protein | location=TGGT1_chrXI:267813-271388(-) | protein_length=654 | sequence_SO=chromosome | SO=protein_coding | is_pseudo=false	TGGT1_308860-t26_1-p1	70 kDa	0.999958	14	1	14528440	16589070	13864820	0.19	0.67	0.87
TRUE	Empty	TGGT1_288830-t26_1-p1 | transcript=TGGT1_288830-t26_1 | gene=TGGT1_288830 | organism=Toxoplasma_gondii_GT1 | gene_product=NADH dehydrogenase (NDH2-II) | transcript_product=NADH dehydrogenase (NDH2-II) | location=TGGT1_chrIX:2563874-2571485(+) | protein_length=657 | sequence_SO=chromosome | SO=protein_coding | is_pseudo=false	TGGT1_288830-t26_1-p1	72 kDa	0.999957	14	1	8148005	8814837	7098050	0.24	0.28	0.44
TRUE	Empty	TGGT1_232130-t26_1-p1 | transcript=TGGT1_232130-t26_1 | gene=TGGT1_232130 | organism=Toxoplasma_gondii_GT1 | gene_product=hypothetical protein | transcript_product=hypothetical protein | location=TGGT1_chrVIII:1876792-1879382(+) | protein_length=456 | sequence_SO=chromosome | SO=protein_coding | is_pseudo=false	TGGT1_232130-t26_1-p1	49 kDa	0.99993	14	1	19885580	22593540	15973520	0.033	0.4	0.19
TRUE	Empty	TGGT1_253440-t26_1-p1 | transcript=TGGT1_253440-t26_1 | gene=TGGT1_253440 | organism=Toxoplasma_gondii_GT1 | gene_product=putative cell-cycle-associated protein kinase SRPK | transcript_product=putative cell-cycle-associated protein kinase SRPK | location=TGGT1_chrIII:942676-953857(+) | protein_length=1763 | sequence_SO=chromosome | SO=protein_coding | is_pseudo=false	TGGT1_253440-t26_1-p1	187 kDa	0.999922	14	1	3751590	2500635	2974830	0.76	0.58	0.75
TRUE	Empty	TGGT1_247000-t26_1-p1 | transcript=TGGT1_247000-t26_1 | gene=TGGT1_247000 | organism=Toxoplasma_gondii_GT1 | gene_product=tetratricopeptide repeat-containing protein | transcript_product=tetratricopeptide repeat-containing protein | location=TGGT1_chrXII:3025928-3029976(+) | protein_length=887 | sequence_SO=chromosome | SO=protein_coding | is_pseudo=false	TGGT1_247000-t26_1-p1	97 kDa	0.999921	14	1	3076444	3247392	3126133	0.45	0.84	0.95
TRUE	Empty	TGGT1_208790-t26_1-p1 | transcript=TGGT1_208790-t26_1 | gene=TGGT1_208790 | organism=Toxoplasma_gondii_GT1 | gene_product=putative MC family transporter | transcript_product=putative MC family transporter | location=TGGT1_chrIb:876872-880126(-) | protein_length=310 | sequence_SO=chromosome | SO=protein_coding | is_pseudo=false	TGGT1_208790-t26_1-p1	34 kDa	0.999907	13	1	11754130	12496380	9918340	0.34	0.64	0.38
TRUE	Empty	TGGT1_232180-t26_1-p1 | transcript=TGGT1_232180-t26_1 | gene=TGGT1_232180 | organism=Toxoplasma_gondii_GT1 | gene_product=UBA/TS-N domain-containing protein | transcript_product=UBA/TS-N domain-containing protein | location=TGGT1_chrVIII:1913899-1924568(-) | protein_length=1865 | sequence_SO=chromosome | SO=protein_coding | is_pseudo=false	TGGT1_232180-t26_1-p1	207 kDa	0.999896	14	1	7967392	7134680	7789166	0.28	0.51	0.89
TRUE	Empty	TGGT1_246982-t26_1-p1 | transcript=TGGT1_246982-t26_1 | gene=TGGT1_246982 | organism=Toxoplasma_gondii_GT1 | gene_product=hypothetical protein | transcript_product=hypothetical protein | location=TGGT1_chrXII:3000244-3004134(-) | protein_length=1042 | sequence_SO=chromosome | SO=protein_coding | is_pseudo=false	TGGT1_246982-t26_1-p1	114 kDa	0.999861	14	1	2835926	2712651	2951292	0.59	0.82	0.84
TRUE	Empty	TGGT1_234380-t26_1-p1 | transcript=TGGT1_234380-t26_1 | gene=TGGT1_234380 | organism=Toxoplasma_gondii_GT1 | gene_product=hypothetical protein | transcript_product=hypothetical protein | location=TGGT1_chrX:4225477-4226948(+) | protein_length=347 | sequence_SO=chromosome | SO=protein_coding | is_pseudo=false	TGGT1_234380-t26_1-p1	39 kDa	0.999828	13	1	34493390	37814440	28734150	0.047	0.65	0.41
TRUE	Empty	TGGT1_312420-t26_1-p1 | transcript=TGGT1_312420-t26_1 | gene=TGGT1_312420 | organism=Toxoplasma_gondii_GT1 | gene_product=hypothetical protein | transcript_product=hypothetical protein | location=TGGT1_chrXI:2633576-2638766(-) | protein_length=1086 | sequence_SO=chromosome | SO=protein_coding | is_pseudo=false	TGGT1_312420-t26_1-p1	118 kDa	0.999812	14	1	1433699	1650517	1390092	0.28	0.58	0.91
TRUE	Empty	TGGT1_286080-t26_1-p1 | transcript=TGGT1_286080-t26_1 | gene=TGGT1_286080 | organism=Toxoplasma_gondii_GT1 | gene_product=elongation factor 2 family protein | transcript_product=elongation factor 2 family protein | location=TGGT1_chrV:1864243-1874860(+) | protein_length=1008 | sequence_SO=chromosome | SO=protein_coding | is_pseudo=false	TGGT1_286080-t26_1-p1	113 kDa	0.999803	14	1	2674002	3127816	3171677	0.92	0.31	0.092
TRUE	Empty	TGGT1_320100-t26_1-p1 | transcript=TGGT1_320100-t26_1 | gene=TGGT1_320100 | organism=Toxoplasma_gondii_GT1 | gene_product=RNA recognition motif-containing protein | transcript_product=RNA recognition motif-containing protein | location=TGGT1_chrIV:443805-449909(+) | protein_length=1216 | sequence_SO=chromosome | SO=protein_coding | is_pseudo=false	TGGT1_320100-t26_1-p1	129 kDa	0.99977	14	1	2335360	2162742	2288314	0.81	0.44	0.93
TRUE	Empty	TGGT1_258770-t26_1-p1 | transcript=TGGT1_258770-t26_1 | gene=TGGT1_258770 | organism=Toxoplasma_gondii_GT1 | gene_product=putative polypeptide n-acetylgalactosaminyltransferase 12 | transcript_product=putative polypeptide n-acetylgalactosaminyltransferase 12 | location=TGGT1_chrVIIb:3160046-3167254(+) | protein_length=692 | sequence_SO=chromosome | SO=protein_coding | is_pseudo=false	TGGT1_258770-t26_1-p1	79 kDa	0.99974	14	1	6969332	7196550	7151369	0.96	0.9	0.92
TRUE	Empty	TGGT1_294200-t26_1-p1 | transcript=TGGT1_294200-t26_1 | gene=TGGT1_294200 | organism=Toxoplasma_gondii_GT1 | gene_product=glucose-6-phosphate 1-dehydrogenase | transcript_product=glucose-6-phosphate 1-dehydrogenase | location=TGGT1_chrIa:683542-690397(+) | protein_length=560 | sequence_SO=chromosome | SO=protein_coding | is_pseudo=false	TGGT1_294200-t26_1-p1	63 kDa	0.999736	14	1	11767380	12307620	10268970	0.45	0.78	0.52
TRUE	Empty	TGGT1_280370-t26_1-p1 | transcript=TGGT1_280370-t26_1 | gene=TGGT1_280370 | organism=Toxoplasma_gondii_GT1 | gene_product=hypothetical protein | transcript_product=hypothetical protein | location=TGGT1_chrVIIa:472199-474884(+) | protein_length=761 | sequence_SO=chromosome | SO=protein_coding | is_pseudo=false	TGGT1_280370-t26_1-p1	82 kDa	0.999718	14	1	8310099	6269000	10886290	0.18	0.58	0.65
TRUE	Empty	TGGT1_225850-t26_1-p1 | transcript=TGGT1_225850-t26_1 | gene=TGGT1_225850 | organism=Toxoplasma_gondii_GT1 | gene_product=peptidase, M28 family protein | transcript_product=peptidase, M28 family protein | location=TGGT1_chrX:1906784-1917654(+) | protein_length=1555 | sequence_SO=chromosome | SO=protein_coding | is_pseudo=false	TGGT1_225850-t26_1-p1	168 kDa	0.999676	14	1	3458767	3429887	3418063	0.99	0.97	0.97
TRUE	Empty	TGGT1_249270-t26_1-p1 | transcript=TGGT1_249270-t26_1 | gene=TGGT1_249270 | organism=Toxoplasma_gondii_GT1 | gene_product=putative protein disulfide isomerase-related protein (provisional) | transcript_product=putative protein disulfide isomerase-related protein (provisional) | location=TGGT1_chrXII:4348987-4354246(+) | protein_length=547 | sequence_SO=chromosome | SO=protein_coding | is_pseudo=f…	TGGT1_249270-t26_1-p1	60 kDa	0.999652	14	0.93	46938200	48385610	50139070	0.52	0.92	0.82
TRUE	Empty	TGGT1_255260-t26_1-p1 | transcript=TGGT1_255260-t26_1 | gene=TGGT1_255260 | organism=Toxoplasma_gondii_GT1 | gene_product=apical membrane antigen AMA1 | transcript_product=apical membrane antigen AMA1 | location=TGGT1_chrVIIb:4856406-4860874(+) | protein_length=569 | sequence_SO=chromosome | SO=protein_coding | is_pseudo=false	TGGT1_255260-t26_1-p1	63 kDa	0.999611	14	1	67940990	80574130	54240480	0.051	0.24	0.15
TRUE	Empty	TGGT1_305240-t26_1-p1 | transcript=TGGT1_305240-t26_1 | gene=TGGT1_305240 | organism=Toxoplasma_gondii_GT1 | gene_product=XPA binding protein 2 family protein | transcript_product=XPA binding protein 2 family protein | location=TGGT1_chrIX:5084920-5092537(+) | protein_length=966 | sequence_SO=chromosome | SO=protein_coding | is_pseudo=false	TGGT1_305240-t26_1-p1	112 kDa	0.999513	14	1	1636115	1829211	1941500	0.77	0.3	0.4
TRUE	Empty	TGGT1_214080-t26_1-p1 | transcript=TGGT1_214080-t26_1 | gene=TGGT1_214080 | organism=Toxoplasma_gondii_GT1 | gene_product=toxofilin | transcript_product=toxofilin | location=TGGT1_chrX:5904318-5905055(+) | protein_length=245 | sequence_SO=chromosome | SO=protein_coding | is_pseudo=false	TGGT1_214080-t26_1-p1	27 kDa	0.999444	14	1	126019900	131023600	111101800	0.28	0.74	0.13
TRUE	Empty	TGGT1_210360-t26_1-p1 | transcript=TGGT1_210360-t26_1 | gene=TGGT1_210360 | organism=Toxoplasma_gondii_GT1 | gene_product=DEAD (Asp-Glu-Ala-Asp) box polypeptide 41 family protein | transcript_product=DEAD (Asp-Glu-Ala-Asp) box polypeptide 41 family protein | location=TGGT1_chrIX:4638505-4645559(-) | protein_length=657 | sequence_SO=chromosome | SO=protein_coding | is_pseudo=false	TGGT1_210360-t26_1-p1	73 kDa	0.999423	14	1	13543730	12496530	14480130	0.03	0.75	0.79
TRUE	Empty	TGGT1_237010-t26_1-p1 | transcript=TGGT1_237010-t26_1 | gene=TGGT1_237010 | organism=Toxoplasma_gondii_GT1 | gene_product=hypothetical protein | transcript_product=hypothetical protein | location=TGGT1_chrX:5557116-5563014(-) | protein_length=645 | sequence_SO=chromosome | SO=protein_coding | is_pseudo=false	TGGT1_237010-t26_1-p1	72 kDa	0.99934	14	1	6501578	7042902	5983038	0.35	0.19	0.61
TRUE	Empty	TGGT1_257470-t26_1-p1 | transcript=TGGT1_257470-t26_1 | gene=TGGT1_257470 | organism=Toxoplasma_gondii_GT1 | gene_product=myosin J | transcript_product=myosin J | location=TGGT1_chrVIIb:3962778-3973847(+) | protein_length=2532 | sequence_SO=chromosome | SO=protein_coding | is_pseudo=false	TGGT1_257470-t26_1-p1	274 kDa	0.999197	14	1	731234	966458	635090	0.028	0.07	0.044
TRUE	Empty	TGGT1_253900-t26_1-p1 | transcript=TGGT1_253900-t26_1 | gene=TGGT1_253900 | organism=Toxoplasma_gondii_GT1 | gene_product=parasite porphobilinogen synthase PBGS | transcript_product=parasite porphobilinogen synthase PBGS | location=TGGT1_chrIII:1265521-1273167(-) | protein_length=658 | sequence_SO=chromosome | SO=protein_coding | is_pseudo=false	TGGT1_253900-t26_1-p1	71 kDa	0.999043	14	1	12951400	12124740	12771380	0.77	0.65	0.95
TRUE	Empty	TGGT1_247470-t26_1-p1 | transcript=TGGT1_247470-t26_1 | gene=TGGT1_247470 | organism=Toxoplasma_gondii_GT1 | gene_product=putative nucleolar protein | transcript_product=putative nucleolar protein | location=TGGT1_chrXII:3291010-3295334(+) | protein_length=536 | sequence_SO=chromosome | SO=protein_coding | is_pseudo=false	TGGT1_247470-t26_1-p1	60 kDa	0.999027	14	1	8966036	8772952	9580477	0.79	0.94	0.82
TRUE	Empty	TGGT1_262380-t26_1-p1 | transcript=TGGT1_262380-t26_1 | gene=TGGT1_262380 | organism=Toxoplasma_gondii_GT1 | gene_product=putative elongation factor Tu | transcript_product=putative elongation factor Tu | location=TGGT1_chrVIIb:1291090-1294751(-) | protein_length=552 | sequence_SO=chromosome | SO=protein_coding | is_pseudo=false	TGGT1_262380-t26_1-p1	60 kDa	0.998969	14	1	10769160	11995930	9147065	0.1	0.2	0.28
TRUE	Empty	TGGT1_239740-t26_1-p1 | transcript=TGGT1_239740-t26_1 | gene=TGGT1_239740 | organism=Toxoplasma_gondii_GT1 | gene_product=dense granule protein GRA14 | transcript_product=dense granule protein GRA14 | location=TGGT1_chrVI:875718-876944(-) | protein_length=408 | sequence_SO=chromosome | SO=protein_coding | is_pseudo=false	TGGT1_239740-t26_1-p1	45 kDa	0.998946	14	1	9598039	9605081	8495701	0.33	0.98	0.32
TRUE	Empty	TGGT1_260630-t26_1-p1 | transcript=TGGT1_260630-t26_1 | gene=TGGT1_260630 | organism=Toxoplasma_gondii_GT1 | gene_product=DnaJ family Sec63 protein | transcript_product=DnaJ family Sec63 protein | location=TGGT1_chrVIIb:2081390-2087953(-) | protein_length=675 | sequence_SO=chromosome | SO=protein_coding | is_pseudo=false	TGGT1_260630-t26_1-p1	77 kDa	0.998909	14	1	21471640	21216350	23205250	0.42	0.96	0.74
TRUE	Empty	TGGT1_225690-t26_1-p1 | transcript=TGGT1_225690-t26_1 | gene=TGGT1_225690 | organism=Toxoplasma_gondii_GT1 | gene_product=hypothetical protein | transcript_product=hypothetical protein | location=TGGT1_chrX:2025685-2031135(+) | protein_length=1816 | sequence_SO=chromosome | SO=protein_coding | is_pseudo=false	TGGT1_225690-t26_1-p1	194 kDa	0.998748	14	1	2609764	2810101	2341635	0.28	0.43	0.52
TRUE	Empty	TGGT1_213610-t26_1-p1 | transcript=TGGT1_213610-t26_1 | gene=TGGT1_213610 | organism=Toxoplasma_gondii_GT1 | gene_product=hypothetical protein | transcript_product=hypothetical protein | location=TGGT1_chrV:1039260-1044139(-) | protein_length=1015 | sequence_SO=chromosome | SO=protein_coding | is_pseudo=false	TGGT1_213610-t26_1-p1	111 kDa	0.998667	14	1	2278854	2062428	5359515	0.41	0.38	0.45
TRUE	Empty	TGGT1_203240-t26_1-p1 | transcript=TGGT1_203240-t26_1 | gene=TGGT1_203240 | organism=Toxoplasma_gondii_GT1 | gene_product=hypothetical protein | transcript_product=hypothetical protein | location=TGGT1_chrVIIa:2547760-2555324(-) | protein_length=739 | sequence_SO=chromosome | SO=protein_coding | is_pseudo=false	TGGT1_203240-t26_1-p1	80 kDa	0.998548	14	1	5963009	5548187	5346978	0.7	0.74	0.64
TRUE	Empty	TGGT1_256770-t26_1-p1 | transcript=TGGT1_256770-t26_1 | gene=TGGT1_256770 | organism=Toxoplasma_gondii_GT1 | gene_product=putative eukaryotic translation initiation factor 4A, isoform 3 | transcript_product=putative eukaryotic translation initiation factor 4A, isoform 3 | location=TGGT1_chrVIIb:4408455-4411451(+) | protein_length=395 | sequence_SO=chromosome | SO=protein_coding | is_pseudo=false	TGGT1_256770-t26_1-p1	45 kDa	0.998456	14	1	12122240	13281880	12740770	0.26	0.54	0.73
TRUE	Empty	TGGT1_214240-t26_1-p1 | transcript=TGGT1_214240-t26_1 | gene=TGGT1_214240 | organism=Toxoplasma_gondii_GT1 | gene_product=bromodomain-containing protein | transcript_product=bromodomain-containing protein | location=TGGT1_chrX:6040602-6063049(+) | protein_length=2973 | sequence_SO=chromosome | SO=protein_coding | is_pseudo=false	TGGT1_214240-t26_1-p1	321 kDa	0.998133	14	1	2453100	2081681	2592298	0.25	0.39	0.8
TRUE	Empty	TGGT1_286920-t26_1-p1 | transcript=TGGT1_286920-t26_1 | gene=TGGT1_286920 | organism=Toxoplasma_gondii_GT1 | gene_product=SWIRM domain-containing protein | transcript_product=SWIRM domain-containing protein | location=TGGT1_chrV:1491994-1499488(+) | protein_length=780 | sequence_SO=chromosome | SO=protein_coding | is_pseudo=false	TGGT1_286920-t26_1-p1	84 kDa	0.998078	14	1	24654500	22168750	24252820	0.71	0.7	0.96
TRUE	Empty	TGGT1_261460-t26_1-p1 | transcript=TGGT1_261460-t26_1 | gene=TGGT1_261460 | organism=Toxoplasma_gondii_GT1 | gene_product=transcriptional elongation factor FACT80 | transcript_product=transcriptional elongation factor FACT80 | location=TGGT1_chrVIIb:1701910-1709548(-) | protein_length=539 | sequence_SO=chromosome | SO=protein_coding | is_pseudo=false	TGGT1_261460-t26_1-p1	61 kDa	0.997362	14	1	6634830	6711365	6604921	0.95	0.96	0.98
TRUE	Empty	TGGT1_289000-t26_1-p1 | transcript=TGGT1_289000-t26_1 | gene=TGGT1_289000 | organism=Toxoplasma_gondii_GT1 | gene_product=hypothetical protein | transcript_product=hypothetical protein | location=TGGT1_chrIX:2710269-2716208(-) | protein_length=1153 | sequence_SO=chromosome | SO=protein_coding | is_pseudo=false	TGGT1_289000-t26_1-p1	126 kDa	0.997347	14	1	9825645	9936128	12848170	0.051	0.95	0.23
TRUE	Empty	TGGT1_310630-t26_1-p1 | transcript=TGGT1_310630-t26_1 | gene=TGGT1_310630 | organism=Toxoplasma_gondii_GT1 | gene_product=hypothetical protein | transcript_product=hypothetical protein | location=TGGT1_chrXI:1453295-1458177(+) | protein_length=515 | sequence_SO=chromosome | SO=protein_coding | is_pseudo=false	TGGT1_310630-t26_1-p1	57 kDa	0.996694	14	1	4220068	3894205	3578228	0.71	0.71	0.61
TRUE	Empty	TGGT1_267650-t26_1-p1 | transcript=TGGT1_267650-t26_1 | gene=TGGT1_267650 | organism=Toxoplasma_gondii_GT1 | gene_product=hypothetical protein | transcript_product=hypothetical protein | location=TGGT1_chrIX:327815-341252(-) | protein_length=3030 | sequence_SO=chromosome | SO=protein_coding | is_pseudo=false	TGGT1_267650-t26_1-p1	324 kDa	0.996442	14	1	1188268	1131923	1106307	0.89	0.75	0.74
TRUE	Empty	TGGT1_275802-t26_1-p1 | transcript=TGGT1_275802-t26_1 | gene=TGGT1_275802 | organism=Toxoplasma_gondii_GT1 | gene_product=SRP72 RNA-binding domain-containing protein | transcript_product=SRP72 RNA-binding domain-containing protein | location=TGGT1_chrIII:207327-214479(-) | protein_length=731 | sequence_SO=chromosome | SO=protein_coding | is_pseudo=false	TGGT1_275802-t26_1-p1	80 kDa	0.994832	14	1	1716112	1961358	2098313	0.85	0.7	0.14
TRUE	Empty	TGGT1_224350A-t26_1-p1 | transcript=TGGT1_224350A-t26_1 | gene=TGGT1_224350A | organism=Toxoplasma_gondii_GT1 | gene_product=putative aminopeptidase N | transcript_product=putative aminopeptidase N | location=TGGT1_chrX:2967893-2975546(-) | protein_length=1219 | sequence_SO=chromosome | SO=protein_coding | is_pseudo=false	TGGT1_224350A-t26_1-p1	134 kDa	0.99438	14	0.86	2485220	2676093	2662298	0.98	0.46	0.79
TRUE	Empty	TGGT1_219800-t26_1-p1 | transcript=TGGT1_219800-t26_1 | gene=TGGT1_219800 | organism=Toxoplasma_gondii_GT1 | gene_product=putative vacuolar ATP synthase subunit b | transcript_product=putative vacuolar ATP synthase subunit b | location=TGGT1_chrXII:574692-577426(+) | protein_length=505 | sequence_SO=chromosome | SO=protein_coding | is_pseudo=false	TGGT1_219800-t26_1-p1	57 kDa	1	13	1	8735984	8530565	8144508	0.66	0.81	0.62
TRUE	Empty	TGGT1_216000-t26_1-p1 | transcript=TGGT1_216000-t26_1 | gene=TGGT1_216000 | organism=Toxoplasma_gondii_GT1 | gene_product=alveolin domain containing intermediate filament IMC3 | transcript_product=alveolin domain containing intermediate filament IMC3 | location=TGGT1_chrXI:6395592-6397208(+) | protein_length=538 | sequence_SO=chromosome | SO=protein_coding | is_pseudo=false	TGGT1_216000-t26_1-p1	58 kDa	0.999999	10	1	7031644	7988528	4784098	0.26	0.42	0.34
TRUE	Empty	TGGT1_239490-t26_1-p1 | transcript=TGGT1_239490-t26_1 | gene=TGGT1_239490 | organism=Toxoplasma_gondii_GT1 | gene_product=dehydrogenase E1 component family protein | transcript_product=dehydrogenase E1 component family protein | location=TGGT1_chrVI:705091-710904(-) | protein_length=571 | sequence_SO=chromosome | SO=protein_coding | is_pseudo=false	TGGT1_239490-t26_1-p1	64 kDa	0.999998	13	1	14705590	16149990	12148560	0.27	0.59	0.33
TRUE	Empty	TGGT1_309752-t26_1-p1 | transcript=TGGT1_309752-t26_1 | gene=TGGT1_309752 | organism=Toxoplasma_gondii_GT1 | gene_product=putative succinate-Coenzyme A ligase, beta subunit | transcript_product=putative succinate-Coenzyme A ligase, beta subunit | location=TGGT1_chrXI:749202-752425(+) | protein_length=498 | sequence_SO=chromosome | SO=protein_coding | is_pseudo=false	TGGT1_309752-t26_1-p1	53 kDa	0.999996	13	1	25904030	27895290	22536110	0.32	0.13	0.48
TRUE	Empty	TGGT1_203310-t26_1-p1 | transcript=TGGT1_203310-t26_1 | gene=TGGT1_203310 | organism=Toxoplasma_gondii_GT1 | gene_product=dense granule protein GRA7 | transcript_product=dense granule protein GRA7 | location=TGGT1_chrVIIa:2502941-2503651(+) | protein_length=236 | sequence_SO=chromosome | SO=protein_coding | is_pseudo=false	TGGT1_203310-t26_1-p1	26 kDa	0.99999	12	1	42851040	47229820	39051100	0.18	0.14	0.42
TRUE	Empty	TGGT1_220270-t26_1-p1 | transcript=TGGT1_220270-t26_1 | gene=TGGT1_220270 | organism=Toxoplasma_gondii_GT1 | gene_product=alveolin domain containing intermediate filament IMC6 | transcript_product=alveolin domain containing intermediate filament IMC6 | location=TGGT1_chrV:152699-154033(-) | protein_length=444 | sequence_SO=chromosome | SO=protein_coding | is_pseudo=false	TGGT1_220270-t26_1-p1	49 kDa	0.99999	13	1	17145020	17998000	14528430	0.17	0.58	0.3
TRUE	Empty	TGGT1_230210-t26_1-p1 | transcript=TGGT1_230210-t26_1 | gene=TGGT1_230210 | organism=Toxoplasma_gondii_GT1 | gene_product=alveolin domain containing intermediate filament IMC10 | transcript_product=alveolin domain containing intermediate filament IMC10 | location=TGGT1_chrVIII:682439-685345(+) | protein_length=560 | sequence_SO=chromosome | SO=protein_coding | is_pseudo=false	TGGT1_230210-t26_1-p1	61 kDa	0.999973	13	1	9251990	11125270	8840017	0.34	0.12	0.82
TRUE	Empty	TGGT1_293570-t26_1-p1 | transcript=TGGT1_293570-t26_1 | gene=TGGT1_293570 | organism=Toxoplasma_gondii_GT1 | gene_product=putative translocation protein sec62 | transcript_product=putative translocation protein sec62 | location=TGGT1_chrIa:408074-414572(-) | protein_length=390 | sequence_SO=chromosome | SO=protein_coding | is_pseudo=false	TGGT1_293570-t26_1-p1	45 kDa	0.999862	12	1	40773260	37310840	42916060	0.48	0.16	0.78
TRUE	Empty	TGGT1_263090-t26_1-p1 | transcript=TGGT1_263090-t26_1 | gene=TGGT1_263090 | organism=Toxoplasma_gondii_GT1 | gene_product=14-3-3 protein | transcript_product=14-3-3 protein | location=TGGT1_chrVIIb:786880-789511(+) | protein_length=323 | sequence_SO=chromosome | SO=protein_coding | is_pseudo=false	TGGT1_263090-t26_1-p1	37 kDa	0.999862	13	1	7673417	7817645	6816298	0.57	0.84	0.61
TRUE	Empty	TGGT1_211290-t26_1-p1 | transcript=TGGT1_211290-t26_1 | gene=TGGT1_211290 | organism=Toxoplasma_gondii_GT1 | gene_product=rhoptry protein ROP15 | transcript_product=rhoptry protein ROP15 | location=TGGT1_chrIV:1780392-1782862(-) | protein_length=333 | sequence_SO=chromosome | SO=protein_coding | is_pseudo=false	TGGT1_211290-t26_1-p1	37 kDa	0.999838	13	1	35201350	34282940	42049990	0.067	0.87	0.32
TRUE	Empty	TGGT1_285870-t26_1-p1 | transcript=TGGT1_285870-t26_1 | gene=TGGT1_285870 | organism=Toxoplasma_gondii_GT1 | gene_product=SAG-related sequence SRS20A | transcript_product=SAG-related sequence SRS20A | location=TGGT1_chrV:2015649-2017548(-) | protein_length=328 | sequence_SO=chromosome | SO=protein_coding | is_pseudo=false	TGGT1_285870-t26_1-p1	35 kDa	0.999828	13	1	17868480	17321350	14505240	0.33	0.85	0.29
TRUE	Empty	TGGT1_214840-t26_1-p1 | transcript=TGGT1_214840-t26_1 | gene=TGGT1_214840 | organism=Toxoplasma_gondii_GT1 | gene_product=AP2 domain transcription factor AP2X-7 | transcript_product=AP2 domain transcription factor AP2X-7 | location=TGGT1_chrX:6426532-6432141(+) | protein_length=1869 | sequence_SO=chromosome | SO=protein_coding | is_pseudo=false	TGGT1_214840-t26_1-p1	184 kDa	0.999821	13	1	2184452	1466563	2126122	0.051	0.013	0.79
TRUE	Empty	TGGT1_239100-t26_1-p1 | transcript=TGGT1_239100-t26_1 | gene=TGGT1_239100 | organism=Toxoplasma_gondii_GT1 | gene_product=ribosomal protein RPS7 | transcript_product=ribosomal protein RPS7 | location=TGGT1_chrVI:457170-458270(+) | protein_length=196 | sequence_SO=chromosome | SO=protein_coding | is_pseudo=false	TGGT1_239100-t26_1-p1	23 kDa	0.999817	12	1	73515960	115211200	121613500	0.86	0.19	0.073
TRUE	Empty	TGGT1_218610-t26_1-p1 | transcript=TGGT1_218610-t26_1 | gene=TGGT1_218610 | organism=Toxoplasma_gondii_GT1 | gene_product=ATPase (DUF699) protein | transcript_product=ATPase (DUF699) protein | location=TGGT1_chrXII:1305454-1315334(-) | protein_length=1247 | sequence_SO=chromosome | SO=protein_coding | is_pseudo=false	TGGT1_218610-t26_1-p1	136 kDa	0.999801	13	1	2929227	3223555	2728405	0.69	0.38	0.86
TRUE	Empty	TGGT1_278990-t26_1-p1 | transcript=TGGT1_278990-t26_1 | gene=TGGT1_278990 | organism=Toxoplasma_gondii_GT1 | gene_product=putative phosphate carrier | transcript_product=putative phosphate carrier | location=TGGT1_chrXII:5622211-5625652(-) | protein_length=479 | sequence_SO=chromosome | SO=protein_coding | is_pseudo=false	TGGT1_278990-t26_1-p1	53 kDa	0.999789	11	1	53459210	54641380	44791390	0.32	0.75	0.38
TRUE	Empty	TGGT1_227810-t26_1-p1 | transcript=TGGT1_227810-t26_1 | gene=TGGT1_227810 | organism=Toxoplasma_gondii_GT1 | gene_product=rhoptry kinase family protein ROP11 (incomplete catalytic triad) | transcript_product=rhoptry kinase family protein ROP11 (incomplete catalytic triad) | location=TGGT1_chrX:715479-717059(+) | protein_length=526 | sequence_SO=chromosome | SO=protein_coding | is_pseudo=false	TGGT1_227810-t26_1-p1	58 kDa	0.999735	13	1	29218580	31084790	29123780	0.6	0.27	0.98
TRUE	Empty	TGGT1_242070-t26_1-p1 | transcript=TGGT1_242070-t26_1 | gene=TGGT1_242070 | organism=Toxoplasma_gondii_GT1 | gene_product=cAMP-dependent protein kinase regulatory subunit | transcript_product=cAMP-dependent protein kinase regulatory subunit | location=TGGT1_chrVI:1804976-1810461(-) | protein_length=385 | sequence_SO=chromosome | SO=protein_coding | is_pseudo=false	TGGT1_242070-t26_1-p1	43 kDa	0.999733	13	1	21466460	24511070	19398850	0.12	0.022	0.37
TRUE	Empty	TGGT1_320430-t26_1-p1 | transcript=TGGT1_320430-t26_1 | gene=TGGT1_320430 | organism=Toxoplasma_gondii_GT1 | gene_product=putative cell-cycle-control protein (translation regulation) | transcript_product=putative cell-cycle-control protein (translation regulation) | location=TGGT1_chrIV:310989-320081(+) | protein_length=1129 | sequence_SO=chromosome | SO=protein_coding | is_pseudo=false	TGGT1_320430-t26_1-p1	131 kDa	0.999663	12	1	1647356	1962025	2113892	0.83	0.33	0.52
TRUE	Empty	TGGT1_219320-t26_1-p1 | transcript=TGGT1_219320-t26_1 | gene=TGGT1_219320 | organism=Toxoplasma_gondii_GT1 | gene_product=acid phosphatase GAP50 | transcript_product=acid phosphatase GAP50 | location=TGGT1_chrXII:907511-910397(-) | protein_length=431 | sequence_SO=chromosome | SO=protein_coding | is_pseudo=false	TGGT1_219320-t26_1-p1	47 kDa	0.999615	11	1	34293630	36406280	30421090	0.2	0.36	0.35
TRUE	Empty	TGGT1_243930-t26_1-p1 | transcript=TGGT1_243930-t26_1 | gene=TGGT1_243930 | organism=Toxoplasma_gondii_GT1 | gene_product=hypothetical protein | transcript_product=hypothetical protein | location=TGGT1_chrVI:2808395-2813397(-) | protein_length=943 | sequence_SO=chromosome | SO=protein_coding | is_pseudo=false	TGGT1_243930-t26_1-p1	101 kDa	0.999601	13	1	5752570	5913140	3936610	0.0086	0.69	0.025
TRUE	Empty	TGGT1_282070-t26_1-p1 | transcript=TGGT1_282070-t26_1 | gene=TGGT1_282070 | organism=Toxoplasma_gondii_GT1 | gene_product=hypothetical protein | transcript_product=hypothetical protein | location=TGGT1_chrVIIa:4270196-4276302(+) | protein_length=1172 | sequence_SO=chromosome | SO=protein_coding | is_pseudo=false	TGGT1_282070-t26_1-p1	125 kDa	0.999586	13	1	2721108	3139638	3271843	0.76	0.38	0.39
TRUE	Empty	TGGT1_267620-t26_1-p1 | transcript=TGGT1_267620-t26_1 | gene=TGGT1_267620 | organism=Toxoplasma_gondii_GT1 | gene_product=multi-pass transmembrane protein | transcript_product=multi-pass transmembrane protein | location=TGGT1_chrIX:346132-354477(+) | protein_length=508 | sequence_SO=chromosome | SO=protein_coding | is_pseudo=false	TGGT1_267620-t26_1-p1	58 kDa	0.999584	13	1	4166318	4469987	3840078	0.078	0.65	0.6
TRUE	Empty	TGGT1_318460-t26_1-p1 | transcript=TGGT1_318460-t26_1 | gene=TGGT1_318460 | organism=Toxoplasma_gondii_GT1 | gene_product=P-type ATPase of unknown pump specificity (type V) protein | transcript_product=P-type ATPase of unknown pump specificity (type V) protein | location=TGGT1_chrIV:1253650-1260940(-) | protein_length=1484 | sequence_SO=chromosome | SO=protein_coding | is_pseudo=false	TGGT1_318460-t26_1-p1	163 kDa	0.999566	13	1	4990082	4898961	4085647	0.19	0.9	0.27
TRUE	Empty	TGGT1_235340-t26_1-p1 | transcript=TGGT1_235340-t26_1 | gene=TGGT1_235340 | organism=Toxoplasma_gondii_GT1 | gene_product=hypothetical protein | transcript_product=hypothetical protein | location=TGGT1_chrX:4675810-4681430(+) | protein_length=720 | sequence_SO=chromosome | SO=protein_coding | is_pseudo=false	TGGT1_235340-t26_1-p1	77 kDa	0.999557	13	1	5553734	6173184	4299464	0.28	0.37	0.38
TRUE	Empty	TGGT1_229640-t26_1-p1 | transcript=TGGT1_229640-t26_1 | gene=TGGT1_229640 | organism=Toxoplasma_gondii_GT1 | gene_product=hypothetical protein | transcript_product=hypothetical protein | location=TGGT1_chrVIII:347644-355417(+) | protein_length=1289 | sequence_SO=chromosome | SO=protein_coding | is_pseudo=false	TGGT1_229640-t26_1-p1	137 kDa	0.999527	13	1	1233946	1334696	1173216	0.52	0.61	0.83
TRUE	Empty	TGGT1_235020-t26_1-p1 | transcript=TGGT1_235020-t26_1 | gene=TGGT1_235020 | organism=Toxoplasma_gondii_GT1 | gene_product=putative COPI protein | transcript_product=putative COPI protein | location=TGGT1_chrX:4501792-4518157(-) | protein_length=1256 | sequence_SO=chromosome | SO=protein_coding | is_pseudo=false	TGGT1_235020-t26_1-p1	137 kDa	0.99952	13	1	1123301	1114473	1006693	0.58	0.97	0.66
TRUE	Empty	TGGT1_262620-t26_1-p1 | transcript=TGGT1_262620-t26_1 | gene=TGGT1_262620 | organism=Toxoplasma_gondii_GT1 | gene_product=RNA recognition motif-containing protein | transcript_product=RNA recognition motif-containing protein | location=TGGT1_chrVIIb:1093901-1096823(+) | protein_length=293 | sequence_SO=chromosome | SO=protein_coding | is_pseudo=false	TGGT1_262620-t26_1-p1	32 kDa	0.999464	13	1	34766930	38235400	31399210	0.38	0.69	0.71
TRUE	Empty	TGGT1_223040-t26_1-p1 | transcript=TGGT1_223040-t26_1 | gene=TGGT1_223040 | organism=Toxoplasma_gondii_GT1 | gene_product=hypothetical protein | transcript_product=hypothetical protein | location=TGGT1_chrII:1361784-1363339(-) | protein_length=239 | sequence_SO=chromosome | SO=protein_coding | is_pseudo=false	TGGT1_223040-t26_1-p1	27 kDa	0.999419	13	1	4355472	4550520	4002868	0.65	0.5	0.76
TRUE	Empty	TGGT1_289150-t26_1-p1 | transcript=TGGT1_289150-t26_1 | gene=TGGT1_289150 | organism=Toxoplasma_gondii_GT1 | gene_product=hypothetical protein | transcript_product=hypothetical protein | location=TGGT1_chrIX:2834909-2839731(-) | protein_length=1002 | sequence_SO=chromosome | SO=protein_coding | is_pseudo=false	TGGT1_289150-t26_1-p1	111 kDa	0.999409	13	1	3255174	3077224	3322382	0.57	0.83	0.94
TRUE	Empty	TGGT1_320490-t26_1-p1 | transcript=TGGT1_320490-t26_1 | gene=TGGT1_320490 | organism=Toxoplasma_gondii_GT1 | gene_product=N-acyl-phosphatidylethanolamine-hydrolyzing phospholipase D family protein | transcript_product=N-acyl-phosphatidylethanolamine-hydrolyzing phospholipase D family protein | location=TGGT1_chrIV:252635-256451(-) | protein_length=1134 | sequence_SO=chromosome | SO=protein_coding…	TGGT1_320490-t26_1-p1	126 kDa	0.999347	13	1	24630720	24747640	28574360	0.0039	0.97	0.29
TRUE	Empty	TGGT1_311480-t26_1-p1 | transcript=TGGT1_311480-t26_1 | gene=TGGT1_311480 | organism=Toxoplasma_gondii_GT1 | gene_product=hypothetical protein | transcript_product=hypothetical protein | location=TGGT1_chrXI:2071805-2077652(-) | protein_length=386 | sequence_SO=chromosome | SO=protein_coding | is_pseudo=false	TGGT1_311480-t26_1-p1	42 kDa	0.999332	12	1	5572400	5181854	4255266	0.062	0.6	0.14
TRUE	Empty	TGGT1_258390-t26_1-p1 | transcript=TGGT1_258390-t26_1 | gene=TGGT1_258390 | organism=Toxoplasma_gondii_GT1 | gene_product=putative DnaJ protein | transcript_product=putative DnaJ protein | location=TGGT1_chrVIIb:3406355-3407941(-) | protein_length=397 | sequence_SO=chromosome | SO=protein_coding | is_pseudo=false	TGGT1_258390-t26_1-p1	45 kDa	0.999271	13	1	34764940	27705560	39271470	0.046	0.09	0.19
TRUE	Empty	TGGT1_208560-t26_1-p1 | transcript=TGGT1_208560-t26_1 | gene=TGGT1_208560 | organism=Toxoplasma_gondii_GT1 | gene_product=carrier superfamily protein | transcript_product=carrier superfamily protein | location=TGGT1_chrIb:794791-800321(-) | protein_length=670 | sequence_SO=chromosome | SO=protein_coding | is_pseudo=false	TGGT1_208560-t26_1-p1	72 kDa	0.99924	13	1	10440050	9968516	9317907	0.78	0.79	0.54
TRUE	Empty	TGGT1_205470-t26_1-p1 | transcript=TGGT1_205470-t26_1 | gene=TGGT1_205470 | organism=Toxoplasma_gondii_GT1 | gene_product=putative translation elongation factor 2 family protein | transcript_product=putative translation elongation factor 2 family protein | location=TGGT1_chrVIIa:1297616-1301283(+) | protein_length=832 | sequence_SO=chromosome | SO=protein_coding | is_pseudo=false	TGGT1_205470-t26_1-p1	93 kDa	0.999221	12	1	1940976	2454759	2043233	0.42	0.33	0.32
TRUE	Empty	TGGT1_305980-t26_1-p1 | transcript=TGGT1_305980-t26_1 | gene=TGGT1_305980 | organism=Toxoplasma_gondii_GT1 | gene_product=pyruvate dehydrogenase complex subunit PDH-E3I | transcript_product=pyruvate dehydrogenase complex subunit PDH-E3I | location=TGGT1_chrIX:5486775-5490424(+) | protein_length=638 | sequence_SO=chromosome | SO=protein_coding | is_pseudo=false	TGGT1_305980-t26_1-p1	67 kDa	0.999171	13	1	13918270	15231650	13816110	0.1	0.63	0.97
TRUE	Empty	TGGT1_208530-t26_1-p1 | transcript=TGGT1_208530-t26_1 | gene=TGGT1_208530 | organism=Toxoplasma_gondii_GT1 | gene_product=nicotinate phosphoribosyltransferase | transcript_product=nicotinate phosphoribosyltransferase | location=TGGT1_chrIb:766715-777045(+) | protein_length=589 | sequence_SO=chromosome | SO=protein_coding | is_pseudo=false	TGGT1_208530-t26_1-p1	66 kDa	0.999105	13	1	1425906	1554205	1488989	0.82	0.76	0.87
TRUE	Empty	TGGT1_274060-t26_1-p1 | transcript=TGGT1_274060-t26_1 | gene=TGGT1_274060 | organism=Toxoplasma_gondii_GT1 | gene_product=2-oxoglutarate/malate translocase OMT | transcript_product=2-oxoglutarate/malate translocase OMT | location=TGGT1_chrVIII:3043521-3046134(+) | protein_length=323 | sequence_SO=chromosome | SO=protein_coding | is_pseudo=false	TGGT1_274060-t26_1-p1	35 kDa	0.99906	13	1	13647040	15449310	12470290	0.12	0.065	0.37
TRUE	Empty	TGGT1_246170-t26_1-p1 | transcript=TGGT1_246170-t26_1 | gene=TGGT1_246170 | organism=Toxoplasma_gondii_GT1 | gene_product=ARID/BRIGHT DNA binding domain-containing protein | transcript_product=ARID/BRIGHT DNA binding domain-containing protein | location=TGGT1_chrXII:2631425-2644738(+) | protein_length=2721 | sequence_SO=chromosome | SO=protein_coding | is_pseudo=false	TGGT1_246170-t26_1-p1	287 kDa	0.998733	13	1	2789051	1981540	2584652	0.2	0.092	0.58
TRUE	Empty	TGGT1_266435-t26_1-p1 | transcript=TGGT1_266435-t26_1 | gene=TGGT1_266435 | organism=Toxoplasma_gondii_GT1 | gene_product=hypothetical protein | transcript_product=hypothetical protein | location=TGGT1_chrIX:954253-978136(+) | protein_length=3668 | sequence_SO=chromosome | SO=protein_coding | is_pseudo=false	TGGT1_266435-t26_1-p1	413 kDa	0.998671	13	1	1296478	1298544	1024926	0.47	1	0.32
TRUE	Empty	TGGT1_260320-t26_1-p1 | transcript=TGGT1_260320-t26_1 | gene=TGGT1_260320 | organism=Toxoplasma_gondii_GT1 | gene_product=Noc2p family protein | transcript_product=Noc2p family protein | location=TGGT1_chrVIIb:2326057-2331884(+) | protein_length=1036 | sequence_SO=chromosome | SO=protein_coding | is_pseudo=false	TGGT1_260320-t26_1-p1	115 kDa	0.998588	13	1	1864784	2194906	1814371	0.54	0.58	0.94
TRUE	Empty	TGGT1_222350-t26_1-p1 | transcript=TGGT1_222350-t26_1 | gene=TGGT1_222350 | organism=Toxoplasma_gondii_GT1 | gene_product=hypothetical protein | transcript_product=hypothetical protein | location=TGGT1_chrII:1038452-1045656(-) | protein_length=410 | sequence_SO=chromosome | SO=protein_coding | is_pseudo=false	TGGT1_222350-t26_1-p1	48 kDa	0.99847	13	1	2877981	3282414	2841062	0.18	0.45	0.93
TRUE	Empty	TGGT1_205250-t26_1-p1 | transcript=TGGT1_205250-t26_1 | gene=TGGT1_205250 | organism=Toxoplasma_gondii_GT1 | gene_product=rhoptry protein ROP18 | transcript_product=rhoptry protein ROP18 | location=TGGT1_chrVIIa:1426782-1428446(-) | protein_length=554 | sequence_SO=chromosome | SO=protein_coding | is_pseudo=false	TGGT1_205250-t26_1-p1	62 kDa	0.99845	13	1	92124270	102801000	83127270	0.38	0.34	0.63
TRUE	Empty	TGGT1_215775-t26_1-p1 | transcript=TGGT1_215775-t26_1 | gene=TGGT1_215775 | organism=Toxoplasma_gondii_GT1 | gene_product=rhoptry protein ROP8 | transcript_product=rhoptry protein ROP8 | location=TGGT1_chrX:7045451-7047178(+) | protein_length=575 | sequence_SO=chromosome | SO=protein_coding | is_pseudo=false	TGGT1_215775-t26_1-p1	65 kDa	0.996932	12	0.75	8128766	6264150	7409959	0.59	0.5	0.71
TRUE	Empty	TGGT1_228100-t26_1-p1 | transcript=TGGT1_228100-t26_1 | gene=TGGT1_228100 | organism=Toxoplasma_gondii_GT1 | gene_product=hypothetical protein | transcript_product=hypothetical protein | location=TGGT1_chrX:493043-502437(-) | protein_length=1314 | sequence_SO=chromosome | SO=protein_coding | is_pseudo=false	TGGT1_228100-t26_1-p1	139 kDa	0.996332	13	1	3199430	2984481	2106802	0.28	0.33	0.22
TRUE	Empty	TGGT1_261000-t26_1-p1 | transcript=TGGT1_261000-t26_1 | gene=TGGT1_261000 | organism=Toxoplasma_gondii_GT1 | gene_product=MutS domain V domain-containing protein | transcript_product=MutS domain V domain-containing protein | location=TGGT1_chrVIIb:1954089-1962135(+) | protein_length=936 | sequence_SO=chromosome | SO=protein_coding | is_pseudo=false	TGGT1_261000-t26_1-p1	102 kDa	0.996233	13	1	3456816	2929336	2941739	0.93	0.1	0.15
TRUE	Empty	TGGT1_294550-t26_1-p1 | transcript=TGGT1_294550-t26_1 | gene=TGGT1_294550 | organism=Toxoplasma_gondii_GT1 | gene_product=dynein heavy chain | transcript_product=dynein heavy chain | location=TGGT1_chrIa:919161-949027(+) | protein_length=4974 | sequence_SO=chromosome | SO=protein_coding | is_pseudo=false	TGGT1_294550-t26_1-p1	559 kDa	0.993672	13	0.92	962704	1295198	1400617	0.89	0.36	0.57
TRUE	Empty	TGGT1_206470-t26_1-p1 | transcript=TGGT1_206470-t26_1 | gene=TGGT1_206470 | organism=Toxoplasma_gondii_GT1 | gene_product=pyruvate dehydrogenase complex subunit PDH-E3II | transcript_product=pyruvate dehydrogenase complex subunit PDH-E3II | location=TGGT1_chrVIIa:922416-929013(+) | protein_length=519 | sequence_SO=chromosome | SO=protein_coding | is_pseudo=false	TGGT1_206470-t26_1-p1	55 kDa	1	12	1	11808260	13956680	10380050	0.16	0.067	0.41
TRUE	Empty	TGGT1_297470-t26_1-p1 | transcript=TGGT1_297470-t26_1 | gene=TGGT1_297470 | organism=Toxoplasma_gondii_GT1 | gene_product=putative myosin light chain 2 | transcript_product=putative myosin light chain 2 | location=TGGT1_chrII:1781267-1787079(+) | protein_length=367 | sequence_SO=chromosome | SO=protein_coding | is_pseudo=false	TGGT1_297470-t26_1-p1	41 kDa	1	12	1	5619420	6820819	4718561	0.08	0.15	0.28
TRUE	Empty	TGGT1_242020-t26_1-p1 | transcript=TGGT1_242020-t26_1 | gene=TGGT1_242020 | organism=Toxoplasma_gondii_GT1 | gene_product=mannosyl-oligosaccharide glucosidase | transcript_product=mannosyl-oligosaccharide glucosidase | location=TGGT1_chrVI:1767616-1773291(+) | protein_length=1374 | sequence_SO=chromosome | SO=protein_coding | is_pseudo=false	TGGT1_242020-t26_1-p1	151 kDa	0.999997	12	1	3554444	3566790	3780581	0.51	0.98	0.61
TRUE	Empty	TGGT1_283510-t26_1-p1 | transcript=TGGT1_283510-t26_1 | gene=TGGT1_283510 | organism=Toxoplasma_gondii_GT1 | gene_product=hypothetical protein | transcript_product=hypothetical protein | location=TGGT1_chrV:2942804-2948041(+) | protein_length=314 | sequence_SO=chromosome | SO=protein_coding | is_pseudo=false	TGGT1_283510-t26_1-p1	35 kDa	0.999985	10	1	10038150	11437710	8663676	0.17	0.3	0.25
TRUE	Empty	TGGT1_311430-t26_1-p1 | transcript=TGGT1_311430-t26_1 | gene=TGGT1_311430 | organism=Toxoplasma_gondii_GT1 | gene_product=fibrillarin | transcript_product=fibrillarin | location=TGGT1_chrXI:2031325-2032910(-) | protein_length=303 | sequence_SO=chromosome | SO=protein_coding | is_pseudo=false	TGGT1_311430-t26_1-p1	32 kDa	0.999985	11	1	15690530	15223640	14997590	0.97	0.93	0.9
TRUE	Empty	TGGT1_267430-t26_1-p1 | transcript=TGGT1_267430-t26_1 | gene=TGGT1_267430 | organism=Toxoplasma_gondii_GT1 | gene_product=DnaJ domain-containing protein | transcript_product=DnaJ domain-containing protein | location=TGGT1_chrIX:490499-496197(+) | protein_length=425 | sequence_SO=chromosome | SO=protein_coding | is_pseudo=false	TGGT1_267430-t26_1-p1	49 kDa	0.999982	11	1	7819928	7376078	8404870	0.14	0.72	0.68
TRUE	Empty	TGGT1_262050-t26_1-p1 | transcript=TGGT1_262050-t26_1 | gene=TGGT1_262050 | organism=Toxoplasma_gondii_GT1 | gene_product=rhoptry kinase family protein ROP39 | transcript_product=rhoptry kinase family protein ROP39 | location=TGGT1_chrVIIb:1382528-1384294(+) | protein_length=588 | sequence_SO=chromosome | SO=protein_coding | is_pseudo=false	TGGT1_262050-t26_1-p1	65 kDa	0.99996	12	1	62278790	62124920	64597540	0.71	0.98	0.78
TRUE	Empty	TGGT1_278830-t26_1-p1 | transcript=TGGT1_278830-t26_1 | gene=TGGT1_278830 | organism=Toxoplasma_gondii_GT1 | gene_product=glucose-6-phosphate 1-dehydrogenase | transcript_product=glucose-6-phosphate 1-dehydrogenase | location=TGGT1_chrXII:5748919-5762087(+) | protein_length=878 | sequence_SO=chromosome | SO=protein_coding | is_pseudo=false	TGGT1_278830-t26_1-p1	98 kDa	0.999959	12	1	1739417	2718301	1647019	0.032	0.18	0.84
TRUE	Empty	TGGT1_235380-t26_1-p1 | transcript=TGGT1_235380-t26_1 | gene=TGGT1_235380 | organism=Toxoplasma_gondii_GT1 | gene_product=hypothetical protein | transcript_product=hypothetical protein | location=TGGT1_chrX:4705213-4712437(-) | protein_length=583 | sequence_SO=chromosome | SO=protein_coding | is_pseudo=false	TGGT1_235380-t26_1-p1	65 kDa	0.999957	12	1	5649982	6224584	5327137	0.024	0.56	0.72
TRUE	Empty	TGGT1_258870B-t26_1-p1 | transcript=TGGT1_258870B-t26_1 | gene=TGGT1_258870B | organism=Toxoplasma_gondii_GT1 | gene_product=hypothetical protein | transcript_product=hypothetical protein | location=TGGT1_chrVIIb:3077592-3081353(-) | protein_length=472 | sequence_SO=chromosome | SO=protein_coding | is_pseudo=false	TGGT1_258870B-t26_1-p1	52 kDa	0.999931	12	0.33	2179941	1878847	1697627	0.17	0.44	0.23
TRUE	Empty	TGGT1_208830-t26_1-p1 | transcript=TGGT1_208830-t26_1 | gene=TGGT1_208830 | organism=Toxoplasma_gondii_GT1 | gene_product=hypothetical protein | transcript_product=hypothetical protein | location=TGGT1_chrIb:904648-906165(-) | protein_length=505 | sequence_SO=chromosome | SO=protein_coding | is_pseudo=false	TGGT1_208830-t26_1-p1	55 kDa	0.999872	12	1	9694748	8148032	9746703	0.49	0.32	0.98
TRUE	Empty	TGGT1_270690-t26_1-p1 | transcript=TGGT1_270690-t26_1 | gene=TGGT1_270690 | organism=Toxoplasma_gondii_GT1 | gene_product=arginyl-tRNA synthetase | transcript_product=arginyl-tRNA synthetase | location=TGGT1_chrVIII:5067864-5080628(-) | protein_length=1174 | sequence_SO=chromosome | SO=protein_coding | is_pseudo=false	TGGT1_270690-t26_1-p1	130 kDa	0.99987	12	1	8847066	7815602	3681920	0.36	0.26	0.31
TRUE	Empty	TGGT1_258950-t26_1-p1 | transcript=TGGT1_258950-t26_1 | gene=TGGT1_258950 | organism=Toxoplasma_gondii_GT1 | gene_product=lectin family protein | transcript_product=lectin family protein | location=TGGT1_chrVIIb:3040792-3044811(+) | protein_length=646 | sequence_SO=chromosome | SO=protein_coding | is_pseudo=false	TGGT1_258950-t26_1-p1	70 kDa	0.999859	12	1	13332240	11425010	12604490	0.17	0.38	0.73
TRUE	Empty	TGGT1_313010-t26_1-p1 | transcript=TGGT1_313010-t26_1 | gene=TGGT1_313010 | organism=Toxoplasma_gondii_GT1 | gene_product=DEAD (Asp-Glu-Ala-Asp) box polypeptide DDX6 | transcript_product=DEAD (Asp-Glu-Ala-Asp) box polypeptide DDX6 | location=TGGT1_chrXI:2995385-2998767(-) | protein_length=475 | sequence_SO=chromosome | SO=protein_coding | is_pseudo=false	TGGT1_313010-t26_1-p1	53 kDa	0.999831	12	1	5127522	4469285	4376425	0.95	0.6	0.67
TRUE	Empty	TGGT1_312530-t26_1-p1 | transcript=TGGT1_312530-t26_1 | gene=TGGT1_312530 | organism=Toxoplasma_gondii_GT1 | gene_product=splicing factor, CC1 family protein | transcript_product=splicing factor, CC1 family protein | location=TGGT1_chrXI:2728437-2730600(+) | protein_length=633 | sequence_SO=chromosome | SO=protein_coding | is_pseudo=false	TGGT1_312530-t26_1-p1	69 kDa	0.999768	12	1	12142110	13468350	13686760	0.93	0.43	0.43
TRUE	Empty	TGGT1_276890-t26_1-p1 | transcript=TGGT1_276890-t26_1 | gene=TGGT1_276890 | organism=Toxoplasma_gondii_GT1 | gene_product=hypothetical protein | transcript_product=hypothetical protein | location=TGGT1_chrXII:6781886-6789601(-) | protein_length=1174 | sequence_SO=chromosome | SO=protein_coding | is_pseudo=false	TGGT1_276890-t26_1-p1	129 kDa	0.99976	12	1	3530226	3057952	3568753	0.4	0.59	0.97
TRUE	Empty	TGGT1_203510-t26_1-p1 | transcript=TGGT1_203510-t26_1 | gene=TGGT1_203510 | organism=Toxoplasma_gondii_GT1 | gene_product=zinc finger, C3HC4 type (RING finger) domain-containing protein | transcript_product=zinc finger, C3HC4 type (RING finger) domain-containing protein | location=TGGT1_chrVIIa:2357035-2361836(+) | protein_length=801 | sequence_SO=chromosome | SO=protein_coding | is_pseudo=false	TGGT1_203510-t26_1-p1	87 kDa	0.999714	12	1	1693869	1685787	2209500	0.15	0.98	0.18
TRUE	Empty	TGGT1_234280-t26_1-p1 | transcript=TGGT1_234280-t26_1 | gene=TGGT1_234280 | organism=Toxoplasma_gondii_GT1 | gene_product=AMP deaminase | transcript_product=AMP deaminase | location=TGGT1_chrX:4167559-4179258(-) | protein_length=1159 | sequence_SO=chromosome | SO=protein_coding | is_pseudo=false	TGGT1_234280-t26_1-p1	129 kDa	0.999704	12	1	2085705	2071314	2053439	0.96	0.96	0.91
TRUE	Empty	TGGT1_291140-t26_1-p1 | transcript=TGGT1_291140-t26_1 | gene=TGGT1_291140 | organism=Toxoplasma_gondii_GT1 | gene_product=CCR4-Not complex component, Not1 protein | transcript_product=CCR4-Not complex component, Not1 protein | location=TGGT1_chrIX:3957969-3969206(+) | protein_length=2562 | sequence_SO=chromosome | SO=protein_coding | is_pseudo=false	TGGT1_291140-t26_1-p1	266 kDa	0.99969	12	1	850381	1028182	680328	0.29	0.6	0.62
TRUE	Empty	TGGT1_313380-t26_1-p1 | transcript=TGGT1_313380-t26_1 | gene=TGGT1_313380 | organism=Toxoplasma_gondii_GT1 | gene_product=hypothetical protein | transcript_product=hypothetical protein | location=TGGT1_chrXI:3292372-3294103(+) | protein_length=274 | sequence_SO=chromosome | SO=protein_coding | is_pseudo=false	TGGT1_313380-t26_1-p1	32 kDa	0.999624	12	1	17935940	16898900	16827330	0.99	0.046	0.83
TRUE	Empty	TGGT1_210980-t26_1-p1 | transcript=TGGT1_210980-t26_1 | gene=TGGT1_210980 | organism=Toxoplasma_gondii_GT1 | gene_product=putative alternative splicing type 3 and | transcript_product=putative alternative splicing type 3 and | location=TGGT1_chrIV:1920085-1926796(-) | protein_length=554 | sequence_SO=chromosome | SO=protein_coding | is_pseudo=false	TGGT1_210980-t26_1-p1	65 kDa	0.999619	12	1	19416880	17798130	21804320	0.29	0.64	0.64
TRUE	Empty	TGGT1_247050-t26_1-p1 | transcript=TGGT1_247050-t26_1 | gene=TGGT1_247050 | organism=Toxoplasma_gondii_GT1 | gene_product=hypothetical protein | transcript_product=hypothetical protein | location=TGGT1_chrXII:3061422-3074479(+) | protein_length=2660 | sequence_SO=chromosome | SO=protein_coding | is_pseudo=false	TGGT1_247050-t26_1-p1	287 kDa	0.999562	12	1	1084396	975766	671128	0.44	0.63	0.37
TRUE	Empty	TGGT1_312150-t26_1-p1 | transcript=TGGT1_312150-t26_1 | gene=TGGT1_312150 | organism=Toxoplasma_gondii_GT1 | gene_product=hypothetical protein | transcript_product=hypothetical protein | location=TGGT1_chrXI:2422714-2426663(+) | protein_length=567 | sequence_SO=chromosome | SO=protein_coding | is_pseudo=false	TGGT1_312150-t26_1-p1	61 kDa	0.999541	12	1	9922860	11857280	9134159	0.073	0.2	0.51
TRUE	Empty	TGGT1_258070-t26_1-p1 | transcript=TGGT1_258070-t26_1 | gene=TGGT1_258070 | organism=Toxoplasma_gondii_GT1 | gene_product=hypothetical protein | transcript_product=hypothetical protein | location=TGGT1_chrVIIb:3570890-3578893(-) | protein_length=678 | sequence_SO=chromosome | SO=protein_coding | is_pseudo=false	TGGT1_258070-t26_1-p1	76 kDa	0.999453	12	1	4299086	4420070	4281732	0.95	0.94	0.99
TRUE	Empty	TGGT1_222360-t26_1-p1 | transcript=TGGT1_222360-t26_1 | gene=TGGT1_222360 | organism=Toxoplasma_gondii_GT1 | gene_product=hypothetical protein | transcript_product=hypothetical protein | location=TGGT1_chrII:1048345-1058294(+) | protein_length=774 | sequence_SO=chromosome | SO=protein_coding | is_pseudo=false	TGGT1_222360-t26_1-p1	83 kDa	0.999451	12	1	5890344	5063653	5828852	0.24	0.019	0.91
TRUE	Empty	TGGT1_313690-t26_1-p1 | transcript=TGGT1_313690-t26_1 | gene=TGGT1_313690 | organism=Toxoplasma_gondii_GT1 | gene_product=Sel1 repeat-containing protein | transcript_product=Sel1 repeat-containing protein | location=TGGT1_chrXI:3574530-3585874(-) | protein_length=1012 | sequence_SO=chromosome | SO=protein_coding | is_pseudo=false	TGGT1_313690-t26_1-p1	112 kDa	0.999442	12	1	2906238	2445409	2945397	0.086	0.011	0.85
TRUE	Empty	TGGT1_305860-t26_1-p1 | transcript=TGGT1_305860-t26_1 | gene=TGGT1_305860 | organism=Toxoplasma_gondii_GT1 | gene_product=calcium-dependent protein kinase CDPK3 | transcript_product=calcium-dependent protein kinase CDPK3 | location=TGGT1_chrIX:5409701-5417293(+) | protein_length=537 | sequence_SO=chromosome | SO=protein_coding | is_pseudo=false	TGGT1_305860-t26_1-p1	60 kDa	0.999274	12	0.83	4362421	4531146	4785043	0.82	0.66	0.72
TRUE	Empty	TGGT1_245470-t26_1-p1 | transcript=TGGT1_245470-t26_1 | gene=TGGT1_245470 | organism=Toxoplasma_gondii_GT1 | gene_product=mitotic checkpoint protein, BUB3 family protein | transcript_product=mitotic checkpoint protein, BUB3 family protein | location=TGGT1_chrXII:2225657-2230112(+) | protein_length=332 | sequence_SO=chromosome | SO=protein_coding | is_pseudo=false	TGGT1_245470-t26_1-p1	37 kDa	0.999269	12	1	6003549	5556185	6339255	0.58	0.26	0.81
TRUE	Empty	TGGT1_314740-t26_1-p1 | transcript=TGGT1_314740-t26_1 | gene=TGGT1_314740 | organism=Toxoplasma_gondii_GT1 | gene_product=PSP protein | transcript_product=PSP protein | location=TGGT1_chrXI:4206581-4212262(+) | protein_length=758 | sequence_SO=chromosome | SO=protein_coding | is_pseudo=false	TGGT1_314740-t26_1-p1	82 kDa	0.999244	12	1	7542185	7121187	7791954	0.6	0.56	0.84
TRUE	Empty	TGGT1_317720-t26_1-p1 | transcript=TGGT1_317720-t26_1 | gene=TGGT1_317720 | organism=Toxoplasma_gondii_GT1 | gene_product=putative eukaryotic translation initiation factor 3 subunit 7 | transcript_product=putative eukaryotic translation initiation factor 3 subunit 7 | location=TGGT1_chrIV:2518527-2525070(+) | protein_length=609 | sequence_SO=chromosome | SO=protein_coding | is_pseudo=false	TGGT1_317720-t26_1-p1	69 kDa	0.99904	12	1	2939124	2868362	3265673	0.6	0.89	0.69
TRUE	Empty	TGGT1_270220-t26_1-p1 | transcript=TGGT1_270220-t26_1 | gene=TGGT1_270220 | organism=Toxoplasma_gondii_GT1 | gene_product=hypothetical protein | transcript_product=hypothetical protein | location=TGGT1_chrVIII:5324535-5328853(+) | protein_length=1296 | sequence_SO=chromosome | SO=protein_coding | is_pseudo=false	TGGT1_270220-t26_1-p1	143 kDa	0.998896	12	1	2497548	2986592	3385732	0.54	0.4	0.14
TRUE	Empty	TGGT1_209190-t26_1-p1 | transcript=TGGT1_209190-t26_1 | gene=TGGT1_209190 | organism=Toxoplasma_gondii_GT1 | gene_product=ABC transporter transmembrane region domain-containing protein | transcript_product=ABC transporter transmembrane region domain-containing protein | location=TGGT1_chrIb:1120264-1125110(-) | protein_length=798 | sequence_SO=chromosome | SO=protein_coding | is_pseudo=false	TGGT1_209190-t26_1-p1	86 kDa	0.998811	12	1	1790552	1558398	1289398	0.66	0.54	0.47
TRUE	Empty	TGGT1_205540-t26_1-p1 | transcript=TGGT1_205540-t26_1 | gene=TGGT1_205540 | organism=Toxoplasma_gondii_GT1 | gene_product=DEAD/DEAH box helicase domain-containing protein | transcript_product=DEAD/DEAH box helicase domain-containing protein | location=TGGT1_chrVIIa:1258363-1265405(+) | protein_length=1064 | sequence_SO=chromosome | SO=protein_coding | is_pseudo=false	TGGT1_205540-t26_1-p1	116 kDa	0.998806	12	1	5048254	4734939	5713475	0.33	0.78	0.66
TRUE	Empty	TGGT1_216860-t26_1-p1 | transcript=TGGT1_216860-t26_1 | gene=TGGT1_216860 | organism=Toxoplasma_gondii_GT1 | gene_product=DEAD (Asp-Glu-Ala-Asp) box polypeptide DDX39 | transcript_product=DEAD (Asp-Glu-Ala-Asp) box polypeptide DDX39 | location=TGGT1_chrXI:5764687-5768776(+) | protein_length=434 | sequence_SO=chromosome | SO=protein_coding | is_pseudo=false	TGGT1_216860-t26_1-p1	49 kDa	0.998746	12	1	4948149	4717820	3354023	0.55	0.93	0.081
TRUE	Empty	TGGT1_275480-t26_1-p1 | transcript=TGGT1_275480-t26_1 | gene=TGGT1_275480 | organism=Toxoplasma_gondii_GT1 | gene_product=Myb family DNA-binding domain-containing protein | transcript_product=Myb family DNA-binding domain-containing protein | location=TGGT1_chrX:7176962-7188868(-) | protein_length=888 | sequence_SO=chromosome | SO=protein_coding | is_pseudo=false	TGGT1_275480-t26_1-p1	99 kDa	0.998448	12	1	2799685	3030791	2983714	0.84	0.63	0.71
TRUE	Empty	TGGT1_312230-t26_1-p1 | transcript=TGGT1_312230-t26_1 | gene=TGGT1_312230 | organism=Toxoplasma_gondii_GT1 | gene_product=putative DNA topoisomerase 2 | transcript_product=putative DNA topoisomerase 2 | location=TGGT1_chrXI:2472947-2490813(-) | protein_length=1658 | sequence_SO=chromosome | SO=protein_coding | is_pseudo=false	TGGT1_312230-t26_1-p1	186 kDa	0.998029	12	1	1368202	1240744	1279114	0.65	0.33	0.45
TRUE	Empty	TGGT1_315080-t26_1-p1 | transcript=TGGT1_315080-t26_1 | gene=TGGT1_315080 | organism=Toxoplasma_gondii_GT1 | gene_product=hypothetical protein | transcript_product=hypothetical protein | location=TGGT1_chrXI:4404182-4413427(+) | protein_length=1517 | sequence_SO=chromosome | SO=protein_coding | is_pseudo=false	TGGT1_315080-t26_1-p1	166 kDa	0.997813	12	1	1826598	1612620	1834489	0.66	0.51	0.99
TRUE	Empty	TGGT1_310440-t26_1-p1 | transcript=TGGT1_310440-t26_1 | gene=TGGT1_310440 | organism=Toxoplasma_gondii_GT1 | gene_product=membrane occupation and recognition nexus protein MORN1 | transcript_product=membrane occupation and recognition nexus protein MORN1 | location=TGGT1_chrXI:1306262-1307353(+) | protein_length=363 | sequence_SO=chromosome | SO=protein_coding | is_pseudo=false	TGGT1_310440-t26_1-p1	41 kDa	0.997697	12	1	4556449	4953421	4359740	0.14	0.66	0.82
TRUE	Empty	TGGT1_205220-t26_1-p1 | transcript=TGGT1_205220-t26_1 | gene=TGGT1_205220 | organism=Toxoplasma_gondii_GT1 | gene_product=putative U5 snRNP-associated subunit | transcript_product=putative U5 snRNP-associated subunit | location=TGGT1_chrVIIa:1443394-1451209(+) | protein_length=1113 | sequence_SO=chromosome | SO=protein_coding | is_pseudo=false	TGGT1_205220-t26_1-p1	123 kDa	0.997622	12	1	843862	763220	784892	0.9	0.69	0.71
TRUE	Empty	TGGT1_290720-t26_1-p1 | transcript=TGGT1_290720-t26_1 | gene=TGGT1_290720 | organism=Toxoplasma_gondii_GT1 | gene_product=putative vacuolar proton translocating ATPase subunit | transcript_product=putative vacuolar proton translocating ATPase subunit | location=TGGT1_chrIX:3665604-3675342(+) | protein_length=1066 | sequence_SO=chromosome | SO=protein_coding | is_pseudo=false	TGGT1_290720-t26_1-p1	118 kDa	0.997498	12	1	10391700	7534000	9762812	0.42	0.19	0.85
TRUE	Empty	TGGT1_238950-t26_1-p1 | transcript=TGGT1_238950-t26_1 | gene=TGGT1_238950 | organism=Toxoplasma_gondii_GT1 | gene_product=putative fatty acyl-CoA desaturase | transcript_product=putative fatty acyl-CoA desaturase | location=TGGT1_chrVI:327886-337165(-) | protein_length=1042 | sequence_SO=chromosome | SO=protein_coding | is_pseudo=false	TGGT1_238950-t26_1-p1	117 kDa	0.997434	12	1	10416830	10814080	13150440	0.037	0.34	0.011
TRUE	Empty	TGGT1_214770-t26_1-p1 | transcript=TGGT1_214770-t26_1 | gene=TGGT1_214770 | organism=Toxoplasma_gondii_GT1 | gene_product=putative small GTP binding protein rab1a | transcript_product=putative small GTP binding protein rab1a | location=TGGT1_chrX:6376684-6380380(+) | protein_length=202 | sequence_SO=chromosome | SO=protein_coding | is_pseudo=false	TGGT1_214770-t26_1-p1	23 kDa	0.997163	12	0.83	17605130	17082510	16541990	0.65	0.81	0.59
TRUE	Empty	TGGT1_298630-t26_1-p1 | transcript=TGGT1_298630-t26_1 | gene=TGGT1_298630 | organism=Toxoplasma_gondii_GT1 | gene_product=vacuolar transporter chaperone VTC2 | transcript_product=vacuolar transporter chaperone VTC2 | location=TGGT1_chrXI:6528718-6536506(+) | protein_length=1308 | sequence_SO=chromosome | SO=protein_coding | is_pseudo=false	TGGT1_298630-t26_1-p1	142 kDa	0.997133	12	1	1618231	1555789	1298278	0.069	0.82	0.3
TRUE	Empty	TGGT1_305270-t26_1-p1 | transcript=TGGT1_305270-t26_1 | gene=TGGT1_305270 | organism=Toxoplasma_gondii_GT1 | gene_product=hypothetical protein | transcript_product=hypothetical protein | location=TGGT1_chrIX:5105581-5110076(+) | protein_length=738 | sequence_SO=chromosome | SO=protein_coding | is_pseudo=false	TGGT1_305270-t26_1-p1	82 kDa	0.996948	12	1	1638351	1311879	1541530	0.47	0.06	0.76
TRUE	Empty	TGGT1_213392-t26_1-p1 | transcript=TGGT1_213392-t26_1 | gene=TGGT1_213392 | organism=Toxoplasma_gondii_GT1 | gene_product=surface antigen repeat-containing protein | transcript_product=surface antigen repeat-containing protein | location=TGGT1_chrV:850154-864700(+) | protein_length=2317 | sequence_SO=chromosome | SO=protein_coding | is_pseudo=false	TGGT1_213392-t26_1-p1	253 kDa	0.996749	12	1	1359429	1722966	850246	0.3	0.74	0.39
TRUE	Empty	TGGT1_411470-t26_1-p1 | transcript=TGGT1_411470-t26_1 | gene=TGGT1_411470 | organism=Toxoplasma_gondii_GT1 | gene_product=putative transmembrane protein | transcript_product=putative transmembrane protein | location=AAQM03000493:218-1321(-) | protein_length=367 | sequence_SO=contig | SO=protein_coding | is_pseudo=false	TGGT1_411470-t26_1-p1	40 kDa	0.994799	12	0.08	3282414	3294705	2985726	0.18	0.94	0.061
TRUE	Empty	TGGT1_287480-t26_1-p1 | transcript=TGGT1_287480-t26_1 | gene=TGGT1_287480 | organism=Toxoplasma_gondii_GT1 | gene_product=hypothetical protein | transcript_product=hypothetical protein | location=TGGT1_chrV:410863-428566(+) | protein_length=4703 | sequence_SO=chromosome | SO=protein_coding | is_pseudo=false	TGGT1_287480-t26_1-p1	503 kDa	0.992982	12	1	3009165	1822977	2880215	0.07	0.0093	0.78
TRUE	Empty	TGGT1_240280-t26_1-p1 | transcript=TGGT1_240280-t26_1 | gene=TGGT1_240280 | organism=Toxoplasma_gondii_GT1 | gene_product=S1/P1nuclease | transcript_product=S1/P1nuclease | location=TGGT1_chrVI:1125848-1133275(-) | protein_length=439 | sequence_SO=chromosome | SO=protein_coding | is_pseudo=false	TGGT1_240280-t26_1-p1	49 kDa	0.999999	10	1	15123150	14824760	14844030	0.99	0.92	0.92
TRUE	Empty	TGGT1_232710-t26_1-p1 | transcript=TGGT1_232710-t26_1 | gene=TGGT1_232710 | organism=Toxoplasma_gondii_GT1 | gene_product=ribosomal protein RPS3A | transcript_product=ribosomal protein RPS3A | location=TGGT1_chrVIII:2231374-2232762(+) | protein_length=259 | sequence_SO=chromosome | SO=protein_coding | is_pseudo=false	TGGT1_232710-t26_1-p1	29 kDa	0.999997	11	1	40159600	44358170	57648750	0.7	0.87	0.67
TRUE	Empty	TGGT1_240060-t26_1-p1 | transcript=TGGT1_240060-t26_1 | gene=TGGT1_240060 | organism=Toxoplasma_gondii_GT1 | gene_product=hypothetical protein | transcript_product=hypothetical protein | location=TGGT1_chrVI:1027949-1030621(+) | protein_length=844 | sequence_SO=chromosome | SO=protein_coding | is_pseudo=false	TGGT1_240060-t26_1-p1	89 kDa	0.999997	11	1	17752950	14511210	16361540	0.55	0.21	0.62
TRUE	Empty	TGGT1_320210-t26_1-p1 | transcript=TGGT1_320210-t26_1 | gene=TGGT1_320210 | organism=Toxoplasma_gondii_GT1 | gene_product=WD domain, G-beta repeat domain containing protein | transcript_product=WD domain, G-beta repeat domain containing protein | location=TGGT1_chrIV:376406-380420(+) | protein_length=515 | sequence_SO=chromosome | SO=protein_coding | is_pseudo=false	TGGT1_320210-t26_1-p1	56 kDa	0.999996	11	1	8484832	9443675	10066650	0.16	0.21	0.083
TRUE	Empty	TGGT1_256840-t26_1-p1 | transcript=TGGT1_256840-t26_1 | gene=TGGT1_256840 | organism=Toxoplasma_gondii_GT1 | gene_product=hypothetical protein | transcript_product=hypothetical protein | location=TGGT1_chrVIIb:4337279-4343791(-) | protein_length=764 | sequence_SO=chromosome | SO=protein_coding | is_pseudo=false	TGGT1_256840-t26_1-p1	83 kDa	0.999991	11	1	7244529	7661723	7046196	0.46	0.7	0.83
TRUE	Empty	TGGT1_263300-t26_1-p1 | transcript=TGGT1_263300-t26_1 | gene=TGGT1_263300 | organism=Toxoplasma_gondii_GT1 | gene_product=eukaryotic porin protein | transcript_product=eukaryotic porin protein | location=TGGT1_chrVIIb:618828-622551(-) | protein_length=290 | sequence_SO=chromosome | SO=protein_coding | is_pseudo=false	TGGT1_263300-t26_1-p1	31 kDa	0.999991	11	1	57959990	60014530	48835860	0.043	0.77	0.25
TRUE	Empty	TGGT1_273520-t26_1-p1 | transcript=TGGT1_273520-t26_1 | gene=TGGT1_273520 | organism=Toxoplasma_gondii_GT1 | gene_product=PCI domain-containing protein | transcript_product=PCI domain-containing protein | location=TGGT1_chrVIII:3416534-3423842(+) | protein_length=601 | sequence_SO=chromosome | SO=protein_coding | is_pseudo=false	TGGT1_273520-t26_1-p1	67 kDa	0.999983	11	1	3002406	3128956	3314548	0.78	0.78	0.61
TRUE	Empty	TGGT1_213010-t26_1-p1 | transcript=TGGT1_213010-t26_1 | gene=TGGT1_213010 | organism=Toxoplasma_gondii_GT1 | gene_product=hypothetical protein | transcript_product=hypothetical protein | location=TGGT1_chrV:649058-659140(-) | protein_length=1036 | sequence_SO=chromosome | SO=protein_coding | is_pseudo=false	TGGT1_213010-t26_1-p1	115 kDa	0.999976	11	1	2628906	2826641	2127761	0.34	0.027	0.45
TRUE	Empty	TGGT1_251540-t26_1-p1 | transcript=TGGT1_251540-t26_1 | gene=TGGT1_251540 | organism=Toxoplasma_gondii_GT1 | gene_product=dense granule protein GRA9 | transcript_product=dense granule protein GRA9 | location=TGGT1_chrXII:5372511-5374084(+) | protein_length=318 | sequence_SO=chromosome | SO=protein_coding | is_pseudo=false	TGGT1_251540-t26_1-p1	35 kDa	0.999968	11	1	14369670	11556190	12533050	0.72	0.21	0.6
TRUE	Empty	TGGT1_261750-t26_1-p1 | transcript=TGGT1_261750-t26_1 | gene=TGGT1_261750 | organism=Toxoplasma_gondii_GT1 | gene_product=rhoptry neck protein RON10 | transcript_product=rhoptry neck protein RON10 | location=TGGT1_chrVIIb:1521076-1525837(-) | protein_length=835 | sequence_SO=chromosome | SO=protein_coding | is_pseudo=false	TGGT1_261750-t26_1-p1	91 kDa	0.999967	11	1	3840095	4214762	3325608	0.24	0.42	0.33
TRUE	Empty	TGGT1_218520-t26_1-p1 | transcript=TGGT1_218520-t26_1 | gene=TGGT1_218520 | organism=Toxoplasma_gondii_GT1 | gene_product=microneme protein MIC6 | transcript_product=microneme protein MIC6 | location=TGGT1_chrXII:1418869-1419918(-) | protein_length=349 | sequence_SO=chromosome | SO=protein_coding | is_pseudo=false	TGGT1_218520-t26_1-p1	37 kDa	0.999957	11	1	15449120	19060500	13175730	0.0087	0.15	0.21
TRUE	Empty	TGGT1_306210-t26_1-p1 | transcript=TGGT1_306210-t26_1 | gene=TGGT1_306210 | organism=Toxoplasma_gondii_GT1 | gene_product=RNA polymerase II accessory factor CDC73 | transcript_product=RNA polymerase II accessory factor CDC73 | location=TGGT1_chrIX:5609297-5613642(+) | protein_length=720 | sequence_SO=chromosome | SO=protein_coding | is_pseudo=false	TGGT1_306210-t26_1-p1	78 kDa	0.999957	11	1	5564134	4845813	6097395	0.33	0.78	0.85
TRUE	Empty	TGGT1_222020-t26_1-p1 | transcript=TGGT1_222020-t26_1 | gene=TGGT1_222020 | organism=Toxoplasma_gondii_GT1 | gene_product=phosphoglycerate kinase PGKII | transcript_product=phosphoglycerate kinase PGKII | location=TGGT1_chrII:744480-749627(+) | protein_length=593 | sequence_SO=chromosome | SO=protein_coding | is_pseudo=false	TGGT1_222020-t26_1-p1	63 kDa	0.999957	11	1	10686240	11908580	10453980	0.27	0.68	0.94
TRUE	Empty	TGGT1_299070-t26_1-p1 | transcript=TGGT1_299070-t26_1 | gene=TGGT1_299070 | organism=Toxoplasma_gondii_GT1 | gene_product=pyruvate kinase PyKII | transcript_product=pyruvate kinase PyKII | location=TGGT1_chrIII:2188027-2191756(+) | protein_length=988 | sequence_SO=chromosome | SO=protein_coding | is_pseudo=false	TGGT1_299070-t26_1-p1	107 kDa	0.999953	11	1	2784416	3334779	2431922	0.048	0.3	0.45
TRUE	Empty	TGGT1_245490-t26_1-p1 | transcript=TGGT1_245490-t26_1 | gene=TGGT1_245490 | organism=Toxoplasma_gondii_GT1 | gene_product=microneme protein MIC8 | transcript_product=microneme protein MIC8 | location=TGGT1_chrXII:2242495-2244549(+) | protein_length=684 | sequence_SO=chromosome | SO=protein_coding | is_pseudo=false	TGGT1_245490-t26_1-p1	75 kDa	0.999951	11	1	5993643	6966256	5608959	0.19	0.35	0.37
TRUE	Empty	TGGT1_246220-t26_1-p1 | transcript=TGGT1_246220-t26_1 | gene=TGGT1_246220 | organism=Toxoplasma_gondii_GT1 | gene_product=hypothetical protein | transcript_product=hypothetical protein | location=TGGT1_chrXII:2685072-2688871(-) | protein_length=811 | sequence_SO=chromosome | SO=protein_coding | is_pseudo=false	TGGT1_246220-t26_1-p1	87 kDa	0.999951	11	1	3466394	3546352	3758232	0.56	0.91	0.71
TRUE	Empty	TGGT1_321500-t26_1-p1 | transcript=TGGT1_321500-t26_1 | gene=TGGT1_321500 | organism=Toxoplasma_gondii_GT1 | gene_product=RNA recognition motif-containing protein | transcript_product=RNA recognition motif-containing protein | location=TGGT1_chrIb:1771014-1773404(+) | protein_length=475 | sequence_SO=chromosome | SO=protein_coding | is_pseudo=false	TGGT1_321500-t26_1-p1	51 kDa	0.999949	10	1	17051140	12828620	16385020	0.58	0.11	0.92
TRUE	Empty	TGGT1_254390-t26_1-p1 | transcript=TGGT1_254390-t26_1 | gene=TGGT1_254390 | organism=Toxoplasma_gondii_GT1 | gene_product=CRAL/TRIO domain-containing protein | transcript_product=CRAL/TRIO domain-containing protein | location=TGGT1_chrIII:1681234-1686817(-) | protein_length=683 | sequence_SO=chromosome | SO=protein_coding | is_pseudo=false	TGGT1_254390-t26_1-p1	76 kDa	0.999943	11	1	1582441	1583741	1056939	0.21	1	0.12
TRUE	Empty	TGGT1_293590-t26_1-p1 | transcript=TGGT1_293590-t26_1 | gene=TGGT1_293590 | organism=Toxoplasma_gondii_GT1 | gene_product=putative 3-oxoacyl-acyl-carrier protein synthase I/II | transcript_product=putative 3-oxoacyl-acyl-carrier protein synthase I/II | location=TGGT1_chrIa:424590-433347(+) | protein_length=551 | sequence_SO=chromosome | SO=protein_coding | is_pseudo=false	TGGT1_293590-t26_1-p1	58 kDa	0.999937	11	1	12666200	14153590	13467430	0.57	0.46	0.71
TRUE	Empty	TGGT1_315690-t26_1-p1 | transcript=TGGT1_315690-t26_1 | gene=TGGT1_315690 | organism=Toxoplasma_gondii_GT1 | gene_product=DnaJ domain-containing protein | transcript_product=DnaJ domain-containing protein | location=TGGT1_chrXI:4848691-4851649(+) | protein_length=294 | sequence_SO=chromosome | SO=protein_coding | is_pseudo=false	TGGT1_315690-t26_1-p1	34 kDa	0.999921	11	1	16872340	26399610	30232130	0.61	0.31	0.26
TRUE	Empty	TGGT1_319850-t26_1-p1 | transcript=TGGT1_319850-t26_1 | gene=TGGT1_319850 | organism=Toxoplasma_gondii_GT1 | gene_product=splicing factor U2AF family SnRNP auxilary factor large subunit, RRM domain-containing protein | transcript_product=splicing factor U2AF family SnRNP auxilary factor large subunit, RRM domain-containing protein | location=TGGT1_chrIV:689661-691811(+) | protein_length=495 | seq…	TGGT1_319850-t26_1-p1	52 kDa	0.999915	9	1	14982810	15852060	16427210	0.9	0.81	0.72
TRUE	Empty	TGGT1_234420-t26_1-p1 | transcript=TGGT1_234420-t26_1 | gene=TGGT1_234420 | organism=Toxoplasma_gondii_GT1 | gene_product=ATPase, AAA family protein | transcript_product=ATPase, AAA family protein | location=TGGT1_chrX:4262179-4269625(-) | protein_length=588 | sequence_SO=chromosome | SO=protein_coding | is_pseudo=false	TGGT1_234420-t26_1-p1	67 kDa	0.999873	11	1	31920750	29339810	37444340	0.4	0.71	0.32
TRUE	Empty	TGGT1_219250-t26_1-p1 | transcript=TGGT1_219250-t26_1 | gene=TGGT1_219250 | organism=Toxoplasma_gondii_GT1 | gene_product=acetyltransferase, GNAT family protein | transcript_product=acetyltransferase, GNAT family protein | location=TGGT1_chrXII:974892-980292(-) | protein_length=823 | sequence_SO=chromosome | SO=protein_coding | is_pseudo=false	TGGT1_219250-t26_1-p1	89 kDa	0.999803	11	1	4115768	3517265	3131609	0.21	0.27	0.08
TRUE	Empty	TGGT1_321440-t26_1-p1 | transcript=TGGT1_321440-t26_1 | gene=TGGT1_321440 | organism=Toxoplasma_gondii_GT1 | gene_product=SWI2/SNF2 ISWI-like SANT | transcript_product=SWI2/SNF2 ISWI-like SANT | location=TGGT1_chrIb:1813361-1823041(+) | protein_length=1249 | sequence_SO=chromosome | SO=protein_coding | is_pseudo=false	TGGT1_321440-t26_1-p1	140 kDa	0.999788	11	1	2074469	1915259	1974681	0.77	0.84	0.9
TRUE	Empty	TGGT1_203780-t26_1-p1 | transcript=TGGT1_203780-t26_1 | gene=TGGT1_203780 | organism=Toxoplasma_gondii_GT1 | gene_product=hypothetical protein | transcript_product=hypothetical protein | location=TGGT1_chrVIIa:2142786-2147213(+) | protein_length=1475 | sequence_SO=chromosome | SO=protein_coding | is_pseudo=false	TGGT1_203780-t26_1-p1	145 kDa	0.999765	11	1	3229698	3144772	3921304	0.092	0.9	0.44
TRUE	Empty	TGGT1_245670-t26_1-p1 | transcript=TGGT1_245670-t26_1 | gene=TGGT1_245670 | organism=Toxoplasma_gondii_GT1 | gene_product=pyruvate dehydrogenase complex subunit PDH-E1Alpha | transcript_product=pyruvate dehydrogenase complex subunit PDH-E1Alpha | location=TGGT1_chrXII:2396583-2400897(+) | protein_length=635 | sequence_SO=chromosome | SO=protein_coding | is_pseudo=false	TGGT1_245670-t26_1-p1	67 kDa	0.999714	11	1	11863430	12930570	13688310	0.66	0.48	0.44
TRUE	Empty	TGGT1_230410-t26_1-p1 | transcript=TGGT1_230410-t26_1 | gene=TGGT1_230410 | organism=Toxoplasma_gondii_GT1 | gene_product=peroxiredoxin PRX3 | transcript_product=peroxiredoxin PRX3 | location=TGGT1_chrVIII:753559-755687(-) | protein_length=283 | sequence_SO=chromosome | SO=protein_coding | is_pseudo=false	TGGT1_230410-t26_1-p1	30 kDa	0.999704	11	1	35089910	42872360	32771060	0.22	0.25	0.75
TRUE	Empty	TGGT1_262730-t26_1-p1 | transcript=TGGT1_262730-t26_1 | gene=TGGT1_262730 | organism=Toxoplasma_gondii_GT1 | gene_product=rhoptry protein ROP16 | transcript_product=rhoptry protein ROP16 | location=TGGT1_chrVIIb:1028456-1030579(-) | protein_length=707 | sequence_SO=chromosome | SO=protein_coding | is_pseudo=false	TGGT1_262730-t26_1-p1	76 kDa	0.999703	11	1	3315400	4429908	2895031	0.034	0.16	0.41
TRUE	Empty	TGGT1_264440-t26_1-p1 | transcript=TGGT1_264440-t26_1 | gene=TGGT1_264440 | organism=Toxoplasma_gondii_GT1 | gene_product=signal recognition particle receptor beta subunit protein | transcript_product=signal recognition particle receptor beta subunit protein | location=TGGT1_chrIX:2059841-2063738(-) | protein_length=347 | sequence_SO=chromosome | SO=protein_coding | is_pseudo=false	TGGT1_264440-t26_1-p1	37 kDa	0.99969	11	1	16530520	17246880	18325740	0.57	0.79	0.59
TRUE	Empty	TGGT1_306220-t26_1-p1 | transcript=TGGT1_306220-t26_1 | gene=TGGT1_306220 | organism=Toxoplasma_gondii_GT1 | gene_product=hypothetical protein | transcript_product=hypothetical protein | location=TGGT1_chrIX:5617255-5624378(+) | protein_length=675 | sequence_SO=chromosome | SO=protein_coding | is_pseudo=false	TGGT1_306220-t26_1-p1	77 kDa	0.99965	11	1	5984753	5775005	8228694	0.049	0.78	0.076
TRUE	Empty	TGGT1_202460-t26_1-p1 | transcript=TGGT1_202460-t26_1 | gene=TGGT1_202460 | organism=Toxoplasma_gondii_GT1 | gene_product=diacylglycerol kinase accessory domain (presumed) domain-containing protein | transcript_product=diacylglycerol kinase accessory domain (presumed) domain-containing protein | location=TGGT1_chrVIIa:3208196-3216030(-) | protein_length=679 | sequence_SO=chromosome | SO=protein_c…	TGGT1_202460-t26_1-p1	73 kDa	0.999637	10	1	28069180	28504110	34797750	0.56	0.96	0.53
TRUE	Empty	TGGT1_202200-t26_1-p1 | transcript=TGGT1_202200-t26_1 | gene=TGGT1_202200 | organism=Toxoplasma_gondii_GT1 | gene_product=hypothetical protein | transcript_product=hypothetical protein | location=TGGT1_chrVIIa:3420532-3424661(-) | protein_length=793 | sequence_SO=chromosome | SO=protein_coding | is_pseudo=false	TGGT1_202200-t26_1-p1	87 kDa	0.999608	11	1	8632455	9385593	6408910	0.0032	0.47	0.092
TRUE	Empty	TGGT1_232830-t26_1-p1 | transcript=TGGT1_232830-t26_1 | gene=TGGT1_232830 | organism=Toxoplasma_gondii_GT1 | gene_product=putative vacuolar proton translocating ATPase subunit A | transcript_product=putative vacuolar proton translocating ATPase subunit A | location=TGGT1_chrVIII:2275918-2280585(-) | protein_length=909 | sequence_SO=chromosome | SO=protein_coding | is_pseudo=false	TGGT1_232830-t26_1-p1	101 kDa	0.999606	11	1	9655114	10279710	7766603	0.22	0.71	0.4
TRUE	Empty	TGGT1_285180-t26_1-p1 | transcript=TGGT1_285180-t26_1 | gene=TGGT1_285180 | organism=Toxoplasma_gondii_GT1 | gene_product=hypothetical protein | transcript_product=hypothetical protein | location=TGGT1_chrV:2405955-2411632(+) | protein_length=632 | sequence_SO=chromosome | SO=protein_coding | is_pseudo=false	TGGT1_285180-t26_1-p1	70 kDa	0.999601	11	1	4412510	4290183	4091039	0.69	0.91	0.74
TRUE	Empty	TGGT1_221950-t26_1-p1 | transcript=TGGT1_221950-t26_1 | gene=TGGT1_221950 | organism=Toxoplasma_gondii_GT1 | gene_product=putative splicesome-associated protein | transcript_product=putative splicesome-associated protein | location=TGGT1_chrII:703092-709611(-) | protein_length=559 | sequence_SO=chromosome | SO=protein_coding | is_pseudo=false	TGGT1_221950-t26_1-p1	65 kDa	0.999593	11	1	7049052	6868269	7348134	0.83	0.92	0.91
TRUE	Empty	TGGT1_232280-t26_1-p1 | transcript=TGGT1_232280-t26_1 | gene=TGGT1_232280 | organism=Toxoplasma_gondii_GT1 | gene_product=hypothetical protein | transcript_product=hypothetical protein | location=TGGT1_chrVIII:1988375-1990326(+) | protein_length=275 | sequence_SO=chromosome | SO=protein_coding | is_pseudo=false	TGGT1_232280-t26_1-p1	30 kDa	0.999578	11	1	5658580	6320358	4413286	0.14	0.32	0.22
TRUE	Empty	TGGT1_260540-t26_1-p1 | transcript=TGGT1_260540-t26_1 | gene=TGGT1_260540 | organism=Toxoplasma_gondii_GT1 | gene_product=alveolin domain containing intermediate filament IMC14 | transcript_product=alveolin domain containing intermediate filament IMC14 | location=TGGT1_chrVIIb:2144399-2148137(+) | protein_length=733 | sequence_SO=chromosome | SO=protein_coding | is_pseudo=false	TGGT1_260540-t26_1-p1	83 kDa	0.999548	11	1	4143436	4643590	4425727	0.66	0.64	0.79
TRUE	Empty	TGGT1_271740-t26_1-p1 | transcript=TGGT1_271740-t26_1 | gene=TGGT1_271740 | organism=Toxoplasma_gondii_GT1 | gene_product=hypothetical protein | transcript_product=hypothetical protein | location=TGGT1_chrVIII:4419752-4431388(+) | protein_length=1992 | sequence_SO=chromosome | SO=protein_coding | is_pseudo=false	TGGT1_271740-t26_1-p1	216 kDa	0.999547	11	1	3455442	2293481	4155440	0.31	0.4	0.7
TRUE	Empty	TGGT1_217540-t26_1-p1 | transcript=TGGT1_217540-t26_1 | gene=TGGT1_217540 | organism=Toxoplasma_gondii_GT1 | gene_product=RNA recognition motif-containing protein | transcript_product=RNA recognition motif-containing protein | location=TGGT1_chrXII:1835563-1837479(-) | protein_length=351 | sequence_SO=chromosome | SO=protein_coding | is_pseudo=false	TGGT1_217540-t26_1-p1	38 kDa	0.999534	10	1	8536000	10011970	10073720	0.98	0.46	0.52
TRUE	Empty	TGGT1_304970-t26_1-p1 | transcript=TGGT1_304970-t26_1 | gene=TGGT1_304970 | organism=Toxoplasma_gondii_GT1 | gene_product=putative cell-cycle-associated protein kinase CDK | transcript_product=putative cell-cycle-associated protein kinase CDK | location=TGGT1_chrIX:4910810-4921648(+) | protein_length=1373 | sequence_SO=chromosome | SO=protein_coding | is_pseudo=false	TGGT1_304970-t26_1-p1	152 kDa	0.999518	11	1	8220927	6778638	9752248	0.031	0.36	0.43
TRUE	Empty	TGGT1_227850-t26_1-p1 | transcript=TGGT1_227850-t26_1 | gene=TGGT1_227850 | organism=Toxoplasma_gondii_GT1 | gene_product=peptidyl-prolyl cis-trans isomerase, cyclophilin-type domain-containing protein | transcript_product=peptidyl-prolyl cis-trans isomerase, cyclophilin-type domain-containing protein | location=TGGT1_chrX:681324-685057(-) | protein_length=592 | sequence_SO=chromosome | SO=protei…	TGGT1_227850-t26_1-p1	66 kDa	0.999516	11	1	5939206	4936135	7774726	0.47	0.61	0.59
TRUE	Empty	TGGT1_222400-t26_1-p1 | transcript=TGGT1_222400-t26_1 | gene=TGGT1_222400 | organism=Toxoplasma_gondii_GT1 | gene_product=hypothetical protein | transcript_product=hypothetical protein | location=TGGT1_chrII:1096079-1099979(+) | protein_length=628 | sequence_SO=chromosome | SO=protein_coding | is_pseudo=false	TGGT1_222400-t26_1-p1	68 kDa	0.999501	11	1	10725340	9672983	16441970	0.48	0.41	0.57
TRUE	Empty	TGGT1_293470-t26_1-p1 | transcript=TGGT1_293470-t26_1 | gene=TGGT1_293470 | organism=Toxoplasma_gondii_GT1 | gene_product=hypothetical protein | transcript_product=hypothetical protein | location=TGGT1_chrIa:333691-336002(-) | protein_length=400 | sequence_SO=chromosome | SO=protein_coding | is_pseudo=false	TGGT1_293470-t26_1-p1	43 kDa	0.999483	11	1	2967372	2972701	2539934	0.45	0.98	0.41
TRUE	Empty	TGGT1_227360-t26_1-p1 | transcript=TGGT1_227360-t26_1 | gene=TGGT1_227360 | organism=Toxoplasma_gondii_GT1 | gene_product=ribosomal protein RPL3 | transcript_product=ribosomal protein RPL3 | location=TGGT1_chrX:901297-903989(-) | protein_length=389 | sequence_SO=chromosome | SO=protein_coding | is_pseudo=false	TGGT1_227360-t26_1-p1	44 kDa	0.999466	11	1	14151690	15769290	15293450	0.88	0.51	0.75
TRUE	Empty	TGGT1_215220-t26_1-p1 | transcript=TGGT1_215220-t26_1 | gene=TGGT1_215220 | organism=Toxoplasma_gondii_GT1 | gene_product=hypothetical protein | transcript_product=hypothetical protein | location=TGGT1_chrX:6716950-6719044(+) | protein_length=502 | sequence_SO=chromosome | SO=protein_coding | is_pseudo=false	TGGT1_215220-t26_1-p1	55 kDa	0.999413	11	1	7811502	7558442	5732848	0.018	0.87	0.21
TRUE	Empty	TGGT1_262430-t26_1-p1 | transcript=TGGT1_262430-t26_1 | gene=TGGT1_262430 | organism=Toxoplasma_gondii_GT1 | gene_product=4-hydroxy-3-methylbut-2-en-1-yl diphosphate synthase | transcript_product=4-hydroxy-3-methylbut-2-en-1-yl diphosphate synthase | location=TGGT1_chrVIIb:1225919-1234294(+) | protein_length=1283 | sequence_SO=chromosome | SO=protein_coding | is_pseudo=false	TGGT1_262430-t26_1-p1	141 kDa	0.999392	11	1	702807	687354	886297	0.5	0.94	0.6
TRUE	Empty	TGGT1_318525-t26_1-p1 | transcript=TGGT1_318525-t26_1 | gene=TGGT1_318525 | organism=Toxoplasma_gondii_GT1 | gene_product=hypothetical protein | transcript_product=hypothetical protein | location=TGGT1_chrIV:1192489-1200329(-) | protein_length=1182 | sequence_SO=chromosome | SO=protein_coding | is_pseudo=false	TGGT1_318525-t26_1-p1	128 kDa	0.999361	11	1	5592049	4279650	5509458	0.14	0.21	0.94
TRUE	Empty	TGGT1_289330-t26_1-p1 | transcript=TGGT1_289330-t26_1 | gene=TGGT1_289330 | organism=Toxoplasma_gondii_GT1 | gene_product=ubiquitin carboxyl-terminal hydrolase family 2 protein | transcript_product=ubiquitin carboxyl-terminal hydrolase family 2 protein | location=TGGT1_chrIX:3004463-3016618(+) | protein_length=2291 | sequence_SO=chromosome | SO=protein_coding | is_pseudo=false	TGGT1_289330-t26_1-p1	248 kDa	0.999294	11	1	1311313	1002578	1304741	0.25	0.23	0.97
TRUE	Empty	TGGT1_248740-t26_1-p1 | transcript=TGGT1_248740-t26_1 | gene=TGGT1_248740 | organism=Toxoplasma_gondii_GT1 | gene_product=hypothetical protein | transcript_product=hypothetical protein | location=TGGT1_chrXII:4066708-4074096(-) | protein_length=1283 | sequence_SO=chromosome | SO=protein_coding | is_pseudo=false	TGGT1_248740-t26_1-p1	140 kDa	0.999237	11	1	5392422	6036412	4652404	0.0064	0.57	0.47
TRUE	Empty	TGGT1_286160B-t26_1-p1 | transcript=TGGT1_286160B-t26_1 | gene=TGGT1_286160B | organism=Toxoplasma_gondii_GT1 | gene_product=non-specific serine/threonine protein kinase | transcript_product=non-specific serine/threonine protein kinase | location=TGGT1_chrV:1801786-1809593(+) | protein_length=1844 | sequence_SO=chromosome | SO=protein_coding | is_pseudo=false	TGGT1_286160B-t26_1-p1	208 kDa	0.999207	11	1	2665030	2426734	2875807	0.36	0.61	0.75
TRUE	Empty	TGGT1_229290-t26_1-p1 | transcript=TGGT1_229290-t26_1 | gene=TGGT1_229290 | organism=Toxoplasma_gondii_GT1 | gene_product=kelch repeat-containing protein | transcript_product=kelch repeat-containing protein | location=TGGT1_chrVIII:132539-141658(-) | protein_length=933 | sequence_SO=chromosome | SO=protein_coding | is_pseudo=false	TGGT1_229290-t26_1-p1	104 kDa	0.999141	11	1	2026435	1675303	3612001	0.02	0.22	0.01
TRUE	Empty	TGGT1_285230-t26_1-p1 | transcript=TGGT1_285230-t26_1 | gene=TGGT1_285230 | organism=Toxoplasma_gondii_GT1 | gene_product=PRP38 family protein | transcript_product=PRP38 family protein | location=TGGT1_chrV:2356663-2366520(-) | protein_length=614 | sequence_SO=chromosome | SO=protein_coding | is_pseudo=false	TGGT1_285230-t26_1-p1	69 kDa	0.999077	11	1	4296283	3906470	4907063	0.64	0.8	0.75
TRUE	Empty	TGGT1_277910-t26_1-p1 | transcript=TGGT1_277910-t26_1 | gene=TGGT1_277910 | organism=Toxoplasma_gondii_GT1 | gene_product=thrombospondin type 1 domain-containing protein | transcript_product=thrombospondin type 1 domain-containing protein | location=TGGT1_chrXII:6346830-6352604(+) | protein_length=1218 | sequence_SO=chromosome | SO=protein_coding | is_pseudo=false	TGGT1_277910-t26_1-p1	133 kDa	0.999052	11	1	2821292	3082039	2530886	0.3	0.36	0.54
TRUE	Empty	TGGT1_235540-t26_1-p1 | transcript=TGGT1_235540-t26_1 | gene=TGGT1_235540 | organism=Toxoplasma_gondii_GT1 | gene_product=putative eukaryotic initiation factor-2 beta | transcript_product=putative eukaryotic initiation factor-2 beta | location=TGGT1_chrX:4824505-4828067(-) | protein_length=231 | sequence_SO=chromosome | SO=protein_coding | is_pseudo=false	TGGT1_235540-t26_1-p1	26 kDa	0.999051	11	1	38034090	45475580	49654550	0.74	0.53	0.29
TRUE	Empty	TGGT1_252380-t26_1-p1 | transcript=TGGT1_252380-t26_1 | gene=TGGT1_252380 | organism=Toxoplasma_gondii_GT1 | gene_product=hypothetical protein | transcript_product=hypothetical protein | location=TGGT1_chrIII:510850-519703(-) | protein_length=1214 | sequence_SO=chromosome | SO=protein_coding | is_pseudo=false	TGGT1_252380-t26_1-p1	135 kDa	0.998979	11	1	3368827	3004332	4687110	0.079	0.23	0.16
TRUE	Empty	TGGT1_253520-t26_1-p1 | transcript=TGGT1_253520-t26_1 | gene=TGGT1_253520 | organism=Toxoplasma_gondii_GT1 | gene_product=U3 small nucleolar RNA-associated protein 6 protein | transcript_product=U3 small nucleolar RNA-associated protein 6 protein | location=TGGT1_chrIII:990022-993852(-) | protein_length=1276 | sequence_SO=chromosome | SO=protein_coding | is_pseudo=false	TGGT1_253520-t26_1-p1	141 kDa	0.998727	11	1	2822978	2232510	3369689	0.098	0.098	0.38
TRUE	Empty	TGGT1_206590-t26_1-p1 | transcript=TGGT1_206590-t26_1 | gene=TGGT1_206590 | organism=Toxoplasma_gondii_GT1 | gene_product=calcium-dependent protein kinase CDPK2A | transcript_product=calcium-dependent protein kinase CDPK2A | location=TGGT1_chrVIIa:775466-782202(-) | protein_length=786 | sequence_SO=chromosome | SO=protein_coding | is_pseudo=false	TGGT1_206590-t26_1-p1	86 kDa	0.998597	11	1	5408538	5209979	5478922	0.64	0.84	0.95
TRUE	Empty	TGGT1_244650-t26_1-p1 | transcript=TGGT1_244650-t26_1 | gene=TGGT1_244650 | organism=Toxoplasma_gondii_GT1 | gene_product=putative eukaryotic initiation factor-5 | transcript_product=putative eukaryotic initiation factor-5 | location=TGGT1_chrVI:3337752-3341085(+) | protein_length=414 | sequence_SO=chromosome | SO=protein_coding | is_pseudo=false	TGGT1_244650-t26_1-p1	47 kDa	0.998567	11	1	16834050	16098010	23105740	0.44	0.89	0.35
TRUE	Empty	TGGT1_240090-t26_1-p1 | transcript=TGGT1_240090-t26_1 | gene=TGGT1_240090 | organism=Toxoplasma_gondii_GT1 | gene_product=putative rhoptry kinase family protein ROP34 | transcript_product=putative rhoptry kinase family protein ROP34 | location=TGGT1_chrVI:1050567-1052967(+) | protein_length=553 | sequence_SO=chromosome | SO=protein_coding | is_pseudo=false	TGGT1_240090-t26_1-p1	62 kDa	0.998479	11	1	5356803	6332013	6337362	1	0.11	0.42
TRUE	Empty	TGGT1_213670-t26_1-p1 | transcript=TGGT1_213670-t26_1 | gene=TGGT1_213670 | organism=Toxoplasma_gondii_GT1 | gene_product=hypothetical protein | transcript_product=hypothetical protein | location=TGGT1_chrV:1089922-1097102(-) | protein_length=790 | sequence_SO=chromosome | SO=protein_coding | is_pseudo=false	TGGT1_213670-t26_1-p1	85 kDa	0.998466	11	1	2801690	2647624	2137678	0.16	0.46	0.067
TRUE	Empty	TGGT1_219630-t26_1-p1 | transcript=TGGT1_219630-t26_1 | gene=TGGT1_219630 | organism=Toxoplasma_gondii_GT1 | gene_product=flavodoxin domain-containing protein | transcript_product=flavodoxin domain-containing protein | location=TGGT1_chrXII:741441-752773(+) | protein_length=949 | sequence_SO=chromosome | SO=protein_coding | is_pseudo=false	TGGT1_219630-t26_1-p1	104 kDa	0.998264	11	1	1494480	1890325	1364395	0.2	0.14	0.63
TRUE	Empty	TGGT1_280700-t26_1-p1 | transcript=TGGT1_280700-t26_1 | gene=TGGT1_280700 | organism=Toxoplasma_gondii_GT1 | gene_product=arginine decarboxylase | transcript_product=arginine decarboxylase | location=TGGT1_chrVIIa:143677-151297(-) | protein_length=1225 | sequence_SO=chromosome | SO=protein_coding | is_pseudo=false	TGGT1_280700-t26_1-p1	136 kDa	0.998252	11	1	795408	787714	666021	0.26	0.96	0.37
TRUE	Empty	TGGT1_284050-t26_1-p1 | transcript=TGGT1_284050-t26_1 | gene=TGGT1_284050 | organism=Toxoplasma_gondii_GT1 | gene_product=DEAD/DEAH box helicase domain-containing protein | transcript_product=DEAD/DEAH box helicase domain-containing protein | location=TGGT1_chrV:2643913-2665787(+) | protein_length=2545 | sequence_SO=chromosome | SO=protein_coding | is_pseudo=false	TGGT1_284050-t26_1-p1	281 kDa	0.998171	11	0.91	28626170	23854330	31853880	0.57	0.46	0.8
TRUE	Empty	TGGT1_209500-t26_1-p1 | transcript=TGGT1_209500-t26_1 | gene=TGGT1_209500 | organism=Toxoplasma_gondii_GT1 | gene_product=hypothetical protein | transcript_product=hypothetical protein | location=TGGT1_chrIb:1286279-1296397(+) | protein_length=2936 | sequence_SO=chromosome | SO=protein_coding | is_pseudo=false	TGGT1_209500-t26_1-p1	313 kDa	0.99813	11	1	658454	655180	764312	0.48	0.99	0.84
TRUE	Empty	TGGT1_277790-t26_1-p1 | transcript=TGGT1_277790-t26_1 | gene=TGGT1_277790 | organism=Toxoplasma_gondii_GT1 | gene_product=hypothetical protein | transcript_product=hypothetical protein | location=TGGT1_chrXII:6421384-6429987(-) | protein_length=1442 | sequence_SO=chromosome | SO=protein_coding | is_pseudo=false	TGGT1_277790-t26_1-p1	159 kDa	0.998029	11	1	2303945	2422092	2296204	0.83	0.44	0.99
TRUE	Empty	TGGT1_293170-t26_1-p1 | transcript=TGGT1_293170-t26_1 | gene=TGGT1_293170 | organism=Toxoplasma_gondii_GT1 | gene_product=hypothetical protein | transcript_product=hypothetical protein | location=TGGT1_chrIa:111048-121227(-) | protein_length=3263 | sequence_SO=chromosome | SO=protein_coding | is_pseudo=false	TGGT1_293170-t26_1-p1	360 kDa	0.998025	11	1	2255109	1937790	2585847	0.15	0.33	0.41
TRUE	Empty	TGGT1_259990-t26_1-p1 | transcript=TGGT1_259990-t26_1 | gene=TGGT1_259990 | organism=Toxoplasma_gondii_GT1 | gene_product=SAC3/GANP family protein | transcript_product=SAC3/GANP family protein | location=TGGT1_chrVIIb:2520717-2529427(+) | protein_length=975 | sequence_SO=chromosome | SO=protein_coding | is_pseudo=false	TGGT1_259990-t26_1-p1	105 kDa	0.99792	11	1	3987694	4286887	4596007	0.79	0.21	0.61
TRUE	Empty	TGGT1_248830-t26_1-p1 | transcript=TGGT1_248830-t26_1 | gene=TGGT1_248830 | organism=Toxoplasma_gondii_GT1 | gene_product=phosphoinositide phospholipase PIPLC | transcript_product=phosphoinositide phospholipase PIPLC | location=TGGT1_chrXII:4131545-4144034(-) | protein_length=1097 | sequence_SO=chromosome | SO=protein_coding | is_pseudo=false	TGGT1_248830-t26_1-p1	122 kDa	0.997842	11	1	2057486	2367477	2441398	0.88	0.039	0.42
TRUE	Empty	TGGT1_313390-t26_1-p1 | transcript=TGGT1_313390-t26_1 | gene=TGGT1_313390 | organism=Toxoplasma_gondii_GT1 | gene_product=ribosomal protein RPL6 | transcript_product=ribosomal protein RPL6 | location=TGGT1_chrXI:3299999-3300967(+) | protein_length=322 | sequence_SO=chromosome | SO=protein_coding | is_pseudo=false	TGGT1_313390-t26_1-p1	36 kDa	0.997771	10	1	23775470	24343560	30033160	0.53	0.67	0.48
TRUE	Empty	TGGT1_202630-t26_1-p1 | transcript=TGGT1_202630-t26_1 | gene=TGGT1_202630 | organism=Toxoplasma_gondii_GT1 | gene_product=ATP-dependent metallopeptidase HflB subfamily protein | transcript_product=ATP-dependent metallopeptidase HflB subfamily protein | location=TGGT1_chrVIIa:3049109-3060691(-) | protein_length=1188 | sequence_SO=chromosome | SO=protein_coding | is_pseudo=false	TGGT1_202630-t26_1-p1	128 kDa	0.997751	11	1	1925608	1832578	1530803	0.42	0.7	0.25
TRUE	Empty	TGGT1_256970-t26_1-p1 | transcript=TGGT1_256970-t26_1 | gene=TGGT1_256970 | organism=Toxoplasma_gondii_GT1 | gene_product=putative vacuolar ATP synthase subunit A | transcript_product=putative vacuolar ATP synthase subunit A | location=TGGT1_chrVIIb:4248002-4257516(-) | protein_length=616 | sequence_SO=chromosome | SO=protein_coding | is_pseudo=false	TGGT1_256970-t26_1-p1	68 kDa	0.997339	11	1	5684797	5480571	4683421	0.33	0.72	0.25
TRUE	Empty	TGGT1_266320-t26_1-p1 | transcript=TGGT1_266320-t26_1 | gene=TGGT1_266320 | organism=Toxoplasma_gondii_GT1 | gene_product=hypothetical protein | transcript_product=hypothetical protein | location=TGGT1_chrIX:1042492-1046643(-) | protein_length=1097 | sequence_SO=chromosome | SO=protein_coding | is_pseudo=false	TGGT1_266320-t26_1-p1	119 kDa	0.997225	11	1	2211410	2401421	2392710	0.96	0.66	0.68
TRUE	Empty	TGGT1_221210-t26_1-p1 | transcript=TGGT1_221210-t26_1 | gene=TGGT1_221210 | organism=Toxoplasma_gondii_GT1 | gene_product=cyclophilin | transcript_product=cyclophilin | location=TGGT1_chrII:118956-120827(+) | protein_length=179 | sequence_SO=chromosome | SO=protein_coding | is_pseudo=false	TGGT1_221210-t26_1-p1	20 kDa	0.996775	11	1	89776990	103698800	108562300	0.0031	0.67	0.59
TRUE	Empty	TGGT1_262670-t26_1-p1 | transcript=TGGT1_262670-t26_1 | gene=TGGT1_262670 | organism=Toxoplasma_gondii_GT1 | gene_product=ribosomal protein RPL18A | transcript_product=ribosomal protein RPL18A | location=TGGT1_chrVIIb:1067095-1069205(+) | protein_length=183 | sequence_SO=chromosome | SO=protein_coding | is_pseudo=false	TGGT1_262670-t26_1-p1	21 kDa	0.996733	10	1	31222440	29653080	36113430	0.51	0.3	0.62
TRUE	Empty	TGGT1_244910-t26_1-p1 | transcript=TGGT1_244910-t26_1 | gene=TGGT1_244910 | organism=Toxoplasma_gondii_GT1 | gene_product=MIZ/SP-RING zinc finger domain-containing protein | transcript_product=MIZ/SP-RING zinc finger domain-containing protein | location=TGGT1_chrVI:3506319-3513206(-) | protein_length=1304 | sequence_SO=chromosome | SO=protein_coding | is_pseudo=false	TGGT1_244910-t26_1-p1	145 kDa	0.99659	11	1	1106368	1027671	1193131	0.53	0.56	0.77
TRUE	Empty	TGGT1_320480-t26_1-p1 | transcript=TGGT1_320480-t26_1 | gene=TGGT1_320480 | organism=Toxoplasma_gondii_GT1 | gene_product=Rab11b | transcript_product=Rab11b | location=TGGT1_chrIV:260360-262094(+) | protein_length=226 | sequence_SO=chromosome | SO=protein_coding | is_pseudo=false	TGGT1_320480-t26_1-p1	25 kDa	0.996317	11	1	4380391	4220977	4548712	0.52	0.81	0.84
TRUE	Empty	TGGT1_290620-t26_1-p1 | transcript=TGGT1_290620-t26_1 | gene=TGGT1_290620 | organism=Toxoplasma_gondii_GT1 | gene_product=hypothetical protein | transcript_product=hypothetical protein | location=TGGT1_chrIX:3578363-3588908(-) | protein_length=2663 | sequence_SO=chromosome | SO=protein_coding | is_pseudo=false	TGGT1_290620-t26_1-p1	297 kDa	0.996228	11	1	2719065	2445403	3467852	0.077	0.72	0.46
TRUE	Empty	TGGT1_264130-t26_1-p1 | transcript=TGGT1_264130-t26_1 | gene=TGGT1_264130 | organism=Toxoplasma_gondii_GT1 | gene_product=hypothetical protein | transcript_product=hypothetical protein | location=TGGT1_chrVIIb:133422-137648(-) | protein_length=673 | sequence_SO=chromosome | SO=protein_coding | is_pseudo=false	TGGT1_264130-t26_1-p1	75 kDa	0.995886	11	1	4700561	3785898	6450186	0.035	0.17	0.076
TRUE	Empty	TGGT1_306190-t26_1-p1 | transcript=TGGT1_306190-t26_1 | gene=TGGT1_306190 | organism=Toxoplasma_gondii_GT1 | gene_product=hypothetical protein | transcript_product=hypothetical protein | location=TGGT1_chrIX:5600255-5603264(+) | protein_length=469 | sequence_SO=chromosome | SO=protein_coding | is_pseudo=false	TGGT1_306190-t26_1-p1	49 kDa	0.995701	11	1	6773013	7104459	7216172	0.94	0.76	0.81
TRUE	Empty	TGGT1_266080-t26_1-p1 | transcript=TGGT1_266080-t26_1 | gene=TGGT1_266080 | organism=Toxoplasma_gondii_GT1 | gene_product=hypothetical protein | transcript_product=hypothetical protein | location=TGGT1_chrIX:1138397-1140583(+) | protein_length=728 | sequence_SO=chromosome | SO=protein_coding | is_pseudo=false	TGGT1_266080-t26_1-p1	81 kDa	0.995346	11	1	6099678	6031828	6192219	0.75	0.88	0.78
TRUE	Empty	TGGT1_289680-t26_1-p1 | transcript=TGGT1_289680-t26_1 | gene=TGGT1_289680 | organism=Toxoplasma_gondii_GT1 | gene_product=Ras-related protein Rab11 | transcript_product=Ras-related protein Rab11 | location=TGGT1_chrIX:3181746-3185073(-) | protein_length=219 | sequence_SO=chromosome | SO=protein_coding | is_pseudo=false	TGGT1_289680-t26_1-p1	25 kDa	0.993374	11	1	17415210	16836490	16912940	0.94	0.69	0.71
TRUE	Empty	TGGT1_312630-t26_1-p1 | transcript=TGGT1_312630-t26_1 | gene=TGGT1_312630 | organism=Toxoplasma_gondii_GT1 | gene_product=putative anonymous antigen-1 | transcript_product=putative anonymous antigen-1 | location=TGGT1_chrXI:2804165-2821550(-) | protein_length=2639 | sequence_SO=chromosome | SO=protein_coding | is_pseudo=false	TGGT1_312630-t26_1-p1	286 kDa	0.992235	11	1	1305374	1314363	2171892	0.23	0.98	0.12
TRUE	Empty	TGGT1_215430-t26_1-p1 | transcript=TGGT1_215430-t26_1 | gene=TGGT1_215430 | organism=Toxoplasma_gondii_GT1 | gene_product=hypothetical protein | transcript_product=hypothetical protein | location=TGGT1_chrX:6843523-6847906(-) | protein_length=244 | sequence_SO=chromosome | SO=protein_coding | is_pseudo=false	TGGT1_215430-t26_1-p1	28 kDa	0.999963	9	1	15182190	15887880	14725720	0.75	0.72	0.9
TRUE	Empty	TGGT1_217740-t26_1-p1 | transcript=TGGT1_217740-t26_1 | gene=TGGT1_217740 | organism=Toxoplasma_gondii_GT1 | gene_product=3-ketoacyl-(acyl-carrier-protein) reductase | transcript_product=3-ketoacyl-(acyl-carrier-protein) reductase | location=TGGT1_chrXII:2024723-2028460(+) | protein_length=376 | sequence_SO=chromosome | SO=protein_coding | is_pseudo=false	TGGT1_217740-t26_1-p1	39 kDa	0.999961	9	1	17838210	18910830	19478420	0.77	0.42	0.46
TRUE	Empty	TGGT1_226380-t26_1-p1 | transcript=TGGT1_226380-t26_1 | gene=TGGT1_226380 | organism=Toxoplasma_gondii_GT1 | gene_product=hypothetical protein | transcript_product=hypothetical protein | location=TGGT1_chrX:1583226-1584362(+) | protein_length=378 | sequence_SO=chromosome | SO=protein_coding | is_pseudo=false	TGGT1_226380-t26_1-p1	43 kDa	0.999955	10	1	8571133	9171764	8779668	0.46	0.43	0.68
TRUE	Empty	TGGT1_315320-t26_1-p1 | transcript=TGGT1_315320-t26_1 | gene=TGGT1_315320 | organism=Toxoplasma_gondii_GT1 | gene_product=SAG-related sequence SRS52A | transcript_product=SAG-related sequence SRS52A | location=TGGT1_chrXI:4594837-4596241(+) | protein_length=329 | sequence_SO=chromosome | SO=protein_coding | is_pseudo=false	TGGT1_315320-t26_1-p1	34 kDa	0.999948	9	1	39084610	43254960	31803770	0.046	0.38	0.21
TRUE	Empty	TGGT1_282055-t26_1-p1 | transcript=TGGT1_282055-t26_1 | gene=TGGT1_282055 | organism=Toxoplasma_gondii_GT1 | gene_product=protein phosphatase PP2C-hn | transcript_product=protein phosphatase PP2C-hn | location=TGGT1_chrVIIa:4262456-4267234(-) | protein_length=478 | sequence_SO=chromosome | SO=protein_coding | is_pseudo=false	TGGT1_282055-t26_1-p1	52 kDa	0.999932	10	1	8406752	9158361	6505263	0.032	0.37	0.036
TRUE	Empty	TGGT1_215470-t26_1-p1 | transcript=TGGT1_215470-t26_1 | gene=TGGT1_215470 | organism=Toxoplasma_gondii_GT1 | gene_product=ribosomal protein RPL10A | transcript_product=ribosomal protein RPL10A | location=TGGT1_chrX:6865357-6867300(+) | protein_length=217 | sequence_SO=chromosome | SO=protein_coding | is_pseudo=false	TGGT1_215470-t26_1-p1	25 kDa	0.999931	10	1	20697620	22021980	21774510	0.89	0.75	0.78
TRUE	Empty	TGGT1_316900-t26_1-p1 | transcript=TGGT1_316900-t26_1 | gene=TGGT1_316900 | organism=Toxoplasma_gondii_GT1 | gene_product=Sas10 C-terminal domain-containing protein | transcript_product=Sas10 C-terminal domain-containing protein | location=TGGT1_chrXI:5539468-5546574(-) | protein_length=800 | sequence_SO=chromosome | SO=protein_coding | is_pseudo=false	TGGT1_316900-t26_1-p1	91 kDa	0.99993	10	1	3135749	2992687	3172638	0.89	0.8	0.98
TRUE	Empty	TGGT1_320220-t26_1-p1 | transcript=TGGT1_320220-t26_1 | gene=TGGT1_320220 | organism=Toxoplasma_gondii_GT1 | gene_product=putative ubiquinol cytochrome c oxidoreductase | transcript_product=putative ubiquinol cytochrome c oxidoreductase | location=TGGT1_chrIV:370998-374481(-) | protein_length=487 | sequence_SO=chromosome | SO=protein_coding | is_pseudo=false	TGGT1_320220-t26_1-p1	55 kDa	0.999927	10	1	11529040	14466030	10810340	0.18	0.086	0.72
TRUE	Empty	TGGT1_319920-t26_1-p1 | transcript=TGGT1_319920-t26_1 | gene=TGGT1_319920 | organism=Toxoplasma_gondii_GT1 | gene_product=2-oxo acid dehydrogenases acyltransferase (catalytic domain) domain-containing protein | transcript_product=2-oxo acid dehydrogenases acyltransferase (catalytic domain) domain-containing protein | location=TGGT1_chrIV:604302-610675(-) | protein_length=669 | sequence_SO=chromos…	TGGT1_319920-t26_1-p1	70 kDa	0.999918	10	1	10516370	11171710	8900790	0.26	0.62	0.24
TRUE	Empty	TGGT1_310320-t26_1-p1 | transcript=TGGT1_310320-t26_1 | gene=TGGT1_310320 | organism=Toxoplasma_gondii_GT1 | gene_product=calreticulin family protein | transcript_product=calreticulin family protein | location=TGGT1_chrXI:1219648-1225281(+) | protein_length=578 | sequence_SO=chromosome | SO=protein_coding | is_pseudo=false	TGGT1_310320-t26_1-p1	64 kDa	0.999916	10	1	4506082	4634555	4747224	0.88	0.41	0.73
TRUE	Empty	TGGT1_230850-t26_1-p1 | transcript=TGGT1_230850-t26_1 | gene=TGGT1_230850 | organism=Toxoplasma_gondii_GT1 | gene_product=hypothetical protein | transcript_product=hypothetical protein | location=TGGT1_chrVIII:1056415-1058913(+) | protein_length=476 | sequence_SO=chromosome | SO=protein_coding | is_pseudo=false	TGGT1_230850-t26_1-p1	51 kDa	0.999912	10	1	4548182	4813878	4336338	0.72	0.69	0.86
TRUE	Empty	TGGT1_288500-t26_1-p1 | transcript=TGGT1_288500-t26_1 | gene=TGGT1_288500 | organism=Toxoplasma_gondii_GT1 | gene_product=FAD Malate-dehydrogenase (MDH-FAD) | transcript_product=FAD Malate-dehydrogenase (MDH-FAD) | location=TGGT1_chrIX:2391742-2395938(-) | protein_length=550 | sequence_SO=chromosome | SO=protein_coding | is_pseudo=false	TGGT1_288500-t26_1-p1	60 kDa	0.999911	10	1	12572320	14965570	11544750	0.2	0.23	0.67
TRUE	Empty	TGGT1_271888-t26_1-p1 | transcript=TGGT1_271888-t26_1 | gene=TGGT1_271888 | organism=Toxoplasma_gondii_GT1 | gene_product=putative 3-ketoacyl-CoA reductase | transcript_product=putative 3-ketoacyl-CoA reductase | location=TGGT1_chrVIII:4294988-4299861(-) | protein_length=342 | sequence_SO=chromosome | SO=protein_coding | is_pseudo=false	TGGT1_271888-t26_1-p1	37 kDa	0.999908	10	1	22547250	21783210	24542040	0.18	0.8	0.55
TRUE	Empty	TGGT1_231170-t26_1-p1 | transcript=TGGT1_231170-t26_1 | gene=TGGT1_231170 | organism=Toxoplasma_gondii_GT1 | gene_product=RecF/RecN/SMC N terminal domain-containing protein | transcript_product=RecF/RecN/SMC N terminal domain-containing protein | location=TGGT1_chrVIII:1275296-1290715(-) | protein_length=1524 | sequence_SO=chromosome | SO=protein_coding | is_pseudo=false	TGGT1_231170-t26_1-p1	170 kDa	0.9999	10	1	902867	1021459	1055213	0.9	0.65	0.67
TRUE	Empty	TGGT1_240710-t26_1-p1 | transcript=TGGT1_240710-t26_1 | gene=TGGT1_240710 | organism=Toxoplasma_gondii_GT1 | gene_product=RNA recognition motif-containing protein | transcript_product=RNA recognition motif-containing protein | location=TGGT1_chrVI:1373239-1386793(+) | protein_length=929 | sequence_SO=chromosome | SO=protein_coding | is_pseudo=false	TGGT1_240710-t26_1-p1	102 kDa	0.999893	10	1	5988749	4039530	4584390	0.41	0.47	0.6
TRUE	Empty	TGGT1_245730-t26_1-p1 | transcript=TGGT1_245730-t26_1 | gene=TGGT1_245730 | organism=Toxoplasma_gondii_GT1 | gene_product=phosphatidylinositol-4-phosphate 5-Kinase | transcript_product=phosphatidylinositol-4-phosphate 5-Kinase | location=TGGT1_chrXII:2437394-2453879(+) | protein_length=2139 | sequence_SO=chromosome | SO=protein_coding | is_pseudo=false	TGGT1_245730-t26_1-p1	232 kDa	0.999885	10	1	922667	880949	882055	0.99	0.78	0.76
TRUE	Empty	TGGT1_233010-t26_1-p1 | transcript=TGGT1_233010-t26_1 | gene=TGGT1_233010 | organism=Toxoplasma_gondii_GT1 | gene_product=putative cell-cycle-assocaited protein kinase ERK7 | transcript_product=putative cell-cycle-assocaited protein kinase ERK7 | location=TGGT1_chrVIII:2333548-2340143(+) | protein_length=692 | sequence_SO=chromosome | SO=protein_coding | is_pseudo=false	TGGT1_233010-t26_1-p1	74 kDa	0.999868	9	1	11399250	11105300	13802250	0.44	0.87	0.54
TRUE	Empty	TGGT1_220100-t26_1-p1 | transcript=TGGT1_220100-t26_1 | gene=TGGT1_220100 | organism=Toxoplasma_gondii_GT1 | gene_product=phosphoribosylpyrophosphate synthetase | transcript_product=phosphoribosylpyrophosphate synthetase | location=TGGT1_chrV:29152-31918(+) | protein_length=557 | sequence_SO=chromosome | SO=protein_coding | is_pseudo=false	TGGT1_220100-t26_1-p1	61 kDa	0.999859	10	1	4617605	5134767	3383625	0.12	0.46	0.14
TRUE	Empty	TGGT1_233500-t26_1-p1 | transcript=TGGT1_233500-t26_1 | gene=TGGT1_233500 | organism=Toxoplasma_gondii_GT1 | gene_product=triose-phosphate isomerase TPI-II | transcript_product=triose-phosphate isomerase TPI-II | location=TGGT1_chrVIII:2678566-2683488(-) | protein_length=375 | sequence_SO=chromosome | SO=protein_coding | is_pseudo=false	TGGT1_233500-t26_1-p1	40 kDa	0.999858	10	1	17493880	19840910	18412000	0.11	0.51	0.77
TRUE	Empty	TGGT1_248880-t26_1-p1 | transcript=TGGT1_248880-t26_1 | gene=TGGT1_248880 | organism=Toxoplasma_gondii_GT1 | gene_product=GTPase RAB7 | transcript_product=GTPase RAB7 | location=TGGT1_chrXII:4169929-4175109(-) | protein_length=432 | sequence_SO=chromosome | SO=protein_coding | is_pseudo=false	TGGT1_248880-t26_1-p1	48 kDa	0.999815	9	1	26581920	24389200	24293950	0.98	0.73	0.69
TRUE	Empty	TGGT1_319350-t26_1-p1 | transcript=TGGT1_319350-t26_1 | gene=TGGT1_319350 | organism=Toxoplasma_gondii_GT1 | gene_product=SAG-related sequence SRS17B | transcript_product=SAG-related sequence SRS17B | location=TGGT1_chrIV:957373-958987(+) | protein_length=379 | sequence_SO=chromosome | SO=protein_coding | is_pseudo=false	TGGT1_319350-t26_1-p1	39 kDa	0.999813	10	1	20279280	23322540	20879370	0.52	0.13	0.87
TRUE	Empty	TGGT1_292120-t26_1-p1 | transcript=TGGT1_292120-t26_1 | gene=TGGT1_292120 | organism=Toxoplasma_gondii_GT1 | gene_product=membrane occupation and recognition nexus protein MORN2 | transcript_product=membrane occupation and recognition nexus protein MORN2 | location=TGGT1_chrIX:4369445-4370842(+) | protein_length=465 | sequence_SO=chromosome | SO=protein_coding | is_pseudo=false	TGGT1_292120-t26_1-p1	49 kDa	0.999812	10	1	1468729	1816033	1265957	0.38	0.33	0.65
TRUE	Empty	TGGT1_246580-t26_1-p1 | transcript=TGGT1_246580-t26_1 | gene=TGGT1_246580 | organism=Toxoplasma_gondii_GT1 | gene_product=hypothetical protein | transcript_product=hypothetical protein | location=TGGT1_chrXII:2793978-2797673(+) | protein_length=383 | sequence_SO=chromosome | SO=protein_coding | is_pseudo=false	TGGT1_246580-t26_1-p1	43 kDa	0.99981	10	1	11559140	11637830	12716410	0.24	0.97	0.67
TRUE	Empty	TGGT1_239820-t26_1-p1 | transcript=TGGT1_239820-t26_1 | gene=TGGT1_239820 | organism=Toxoplasma_gondii_GT1 | gene_product=D-3-phosphoglycerate dehydrogenase | transcript_product=D-3-phosphoglycerate dehydrogenase | location=TGGT1_chrVI:931789-940557(-) | protein_length=604 | sequence_SO=chromosome | SO=protein_coding | is_pseudo=false	TGGT1_239820-t26_1-p1	65 kDa	0.999807	10	1	4180059	3188314	3221786	0.97	0.31	0.47
TRUE	Empty	TGGT1_250710-t26_1-p1 | transcript=TGGT1_250710-t26_1 | gene=TGGT1_250710 | organism=Toxoplasma_gondii_GT1 | gene_product=microneme protein MIC10 | transcript_product=microneme protein MIC10 | location=TGGT1_chrXII:5071359-5071955(+) | protein_length=198 | sequence_SO=chromosome | SO=protein_coding | is_pseudo=false	TGGT1_250710-t26_1-p1	23 kDa	0.999791	10	1	12233190	13032810	10264470	0.13	0.73	0.45
TRUE	Empty	TGGT1_254470-t26_1-p1 | transcript=TGGT1_254470-t26_1 | gene=TGGT1_254470 | organism=Toxoplasma_gondii_GT1 | gene_product=hypothetical protein | transcript_product=hypothetical protein | location=TGGT1_chrIII:1739403-1743582(+) | protein_length=732 | sequence_SO=chromosome | SO=protein_coding | is_pseudo=false	TGGT1_254470-t26_1-p1	80 kDa	0.999786	9	1	1303575	1251652	1084413	0.6	0.85	0.34
TRUE	Empty	TGGT1_273960-t26_1-p1 | transcript=TGGT1_273960-t26_1 | gene=TGGT1_273960 | organism=Toxoplasma_gondii_GT1 | gene_product=chaperonin GroS protein | transcript_product=chaperonin GroS protein | location=TGGT1_chrVIII:3141275-3146091(+) | protein_length=374 | sequence_SO=chromosome | SO=protein_coding | is_pseudo=false	TGGT1_273960-t26_1-p1	40 kDa	0.999717	10	1	14639710	15241690	14590820	0.58	0.86	0.99
TRUE	Empty	TGGT1_228000-t26_1-p1 | transcript=TGGT1_228000-t26_1 | gene=TGGT1_228000 | organism=Toxoplasma_gondii_GT1 | gene_product=putative splicing factor 3A subunit 2 | transcript_product=putative splicing factor 3A subunit 2 | location=TGGT1_chrX:588325-591099(+) | protein_length=242 | sequence_SO=chromosome | SO=protein_coding | is_pseudo=false	TGGT1_228000-t26_1-p1	28 kDa	0.999669	10	1	3995868	4270984	4266518	1	0.81	0.85
TRUE	Empty	TGGT1_305750-t26_1-p1 | transcript=TGGT1_305750-t26_1 | gene=TGGT1_305750 | organism=Toxoplasma_gondii_GT1 | gene_product=putative nucleolar gtp-binding protein 2 | transcript_product=putative nucleolar gtp-binding protein 2 | location=TGGT1_chrIX:5323820-5332283(+) | protein_length=641 | sequence_SO=chromosome | SO=protein_coding | is_pseudo=false	TGGT1_305750-t26_1-p1	71 kDa	0.999663	10	1	4744093	3805518	4327197	0.74	0.35	0.83
TRUE	Empty	TGGT1_246540-t26_1-p1 | transcript=TGGT1_246540-t26_1 | gene=TGGT1_246540 | organism=Toxoplasma_gondii_GT1 | gene_product=cytochrome c1, heme protein | transcript_product=cytochrome c1, heme protein | location=TGGT1_chrXII:2770945-2774311(+) | protein_length=398 | sequence_SO=chromosome | SO=protein_coding | is_pseudo=false	TGGT1_246540-t26_1-p1	46 kDa	0.999632	10	1	7237294	7682606	6368303	0.5	0.66	0.59
TRUE	Empty	TGGT1_297960A-t26_1-p1 | transcript=TGGT1_297960A-t26_1 | gene=TGGT1_297960A | organism=Toxoplasma_gondii_GT1 | gene_product=rhoptry neck protein RON6 | transcript_product=rhoptry neck protein RON6 | location=TGGT1_chrII:2113619-2118718(-) | protein_length=1510 | sequence_SO=chromosome | SO=protein_coding | is_pseudo=false	TGGT1_297960A-t26_1-p1	158 kDa	0.999572	10	0.9	1317154	1423173	1159669	0.35	0.66	0.63
TRUE	Empty	TGGT1_314400-t26_1-p1 | transcript=TGGT1_314400-t26_1 | gene=TGGT1_314400 | organism=Toxoplasma_gondii_GT1 | gene_product=putative pyruvate dehydrogenase E1 component, beta subunit | transcript_product=putative pyruvate dehydrogenase E1 component, beta subunit | location=TGGT1_chrXI:4024213-4027840(+) | protein_length=423 | sequence_SO=chromosome | SO=protein_coding | is_pseudo=false	TGGT1_314400-t26_1-p1	46 kDa	0.999541	10	1	12947880	14588900	10864930	0.044	0.39	0.25
TRUE	Empty	TGGT1_308870-t26_1-p1 | transcript=TGGT1_308870-t26_1 | gene=TGGT1_308870 | organism=Toxoplasma_gondii_GT1 | gene_product=hypothetical protein | transcript_product=hypothetical protein | location=TGGT1_chrXI:276950-282861(+) | protein_length=693 | sequence_SO=chromosome | SO=protein_coding | is_pseudo=false	TGGT1_308870-t26_1-p1	75 kDa	0.999506	10	1	14698230	18128500	18658020	0.82	0.26	0.13
TRUE	Empty	TGGT1_272910-t26_1-p1 | transcript=TGGT1_272910-t26_1 | gene=TGGT1_272910 | organism=Toxoplasma_gondii_GT1 | gene_product=T-complex protein 1 delta subunit | transcript_product=T-complex protein 1 delta subunit | location=TGGT1_chrVIII:3700329-3707666(+) | protein_length=542 | sequence_SO=chromosome | SO=protein_coding | is_pseudo=false	TGGT1_272910-t26_1-p1	59 kDa	0.99949	10	1	1560014	1119241	1849716	0.42	0.41	0.77
TRUE	Empty	TGGT1_225860-t26_1-p1 | transcript=TGGT1_225860-t26_1 | gene=TGGT1_225860 | organism=Toxoplasma_gondii_GT1 | gene_product=hypothetical protein | transcript_product=hypothetical protein | location=TGGT1_chrX:1897405-1902365(-) | protein_length=1057 | sequence_SO=chromosome | SO=protein_coding | is_pseudo=false	TGGT1_225860-t26_1-p1	111 kDa	0.99945	10	1	754160	896484	686951	0.41	0.48	0.77
TRUE	Empty	TGGT1_314810-t26_1-p1 | transcript=TGGT1_314810-t26_1 | gene=TGGT1_314810 | organism=Toxoplasma_gondii_GT1 | gene_product=ribosomal protein RPL7 | transcript_product=ribosomal protein RPL7 | location=TGGT1_chrXI:4256933-4260657(+) | protein_length=258 | sequence_SO=chromosome | SO=protein_coding | is_pseudo=false	TGGT1_314810-t26_1-p1	30 kDa	0.999301	9	1	14313960	16396000	15439350	0.78	0.35	0.76
TRUE	Empty	TGGT1_319300-t26_1-p1 | transcript=TGGT1_319300-t26_1 | gene=TGGT1_319300 | organism=Toxoplasma_gondii_GT1 | gene_product=hypothetical protein | transcript_product=hypothetical protein | location=TGGT1_chrIV:1016812-1023315(-) | protein_length=1011 | sequence_SO=chromosome | SO=protein_coding | is_pseudo=false	TGGT1_319300-t26_1-p1	114 kDa	0.999288	10	1	11529600	10006060	11902050	0.02	0.073	0.57
TRUE	Empty	TGGT1_315210-t26_1-p1 | transcript=TGGT1_315210-t26_1 | gene=TGGT1_315210 | organism=Toxoplasma_gondii_GT1 | gene_product=putative rhoptry protein | transcript_product=putative rhoptry protein | location=TGGT1_chrXI:4519390-4526736(-) | protein_length=1010 | sequence_SO=chromosome | SO=protein_coding | is_pseudo=false	TGGT1_315210-t26_1-p1	116 kDa	0.999281	10	0.8	4398686	4839284	3941626	0.38	0.4	0.57
TRUE	Empty	TGGT1_233100-t26_1-p1 | transcript=TGGT1_233100-t26_1 | gene=TGGT1_233100 | organism=Toxoplasma_gondii_GT1 | gene_product=SPFH domain / Band 7 family protein | transcript_product=SPFH domain / Band 7 family protein | location=TGGT1_chrVIII:2412652-2416916(-) | protein_length=290 | sequence_SO=chromosome | SO=protein_coding | is_pseudo=false	TGGT1_233100-t26_1-p1	32 kDa	0.999274	10	1	18750590	20459900	18841890	0.37	0.34	0.96
TRUE	Empty	TGGT1_247220-t26_1-p1 | transcript=TGGT1_247220-t26_1 | gene=TGGT1_247220 | organism=Toxoplasma_gondii_GT1 | gene_product=nudix -type motif 9 isoform a family protein | transcript_product=nudix -type motif 9 isoform a family protein | location=TGGT1_chrXII:3108760-3111719(-) | protein_length=546 | sequence_SO=chromosome | SO=protein_coding | is_pseudo=false	TGGT1_247220-t26_1-p1	61 kDa	0.999254	10	1	2186915	2956400	2038667	0.091	0.27	0.72
TRUE	Empty	TGGT1_219200-t26_1-p1 | transcript=TGGT1_219200-t26_1 | gene=TGGT1_219200 | organism=Toxoplasma_gondii_GT1 | gene_product=DEAD/DEAH box RNA helicase family protein | transcript_product=DEAD/DEAH box RNA helicase family protein | location=TGGT1_chrXII:1014829-1023619(+) | protein_length=962 | sequence_SO=chromosome | SO=protein_coding | is_pseudo=false	TGGT1_219200-t26_1-p1	107 kDa	0.99921	10	1	3199943	2610962	3259373	0.66	0.64	0.97
TRUE	Empty	TGGT1_272695-t26_1-p1 | transcript=TGGT1_272695-t26_1 | gene=TGGT1_272695 | organism=Toxoplasma_gondii_GT1 | gene_product=hypothetical protein | transcript_product=hypothetical protein | location=TGGT1_chrVIII:3784797-3790451(-) | protein_length=614 | sequence_SO=chromosome | SO=protein_coding | is_pseudo=false	TGGT1_272695-t26_1-p1	66 kDa	0.99914	10	1	1400809	1380617	1276638	0.35	0.92	0.58
TRUE	Empty	TGGT1_226690-t26_1-p1 | transcript=TGGT1_226690-t26_1 | gene=TGGT1_226690 | organism=Toxoplasma_gondii_GT1 | gene_product=hypothetical protein | transcript_product=hypothetical protein | location=TGGT1_chrX:1341095-1348983(+) | protein_length=1017 | sequence_SO=chromosome | SO=protein_coding | is_pseudo=false	TGGT1_226690-t26_1-p1	114 kDa	0.99913	10	1	1950864	2056016	1824051	0.1	0.73	0.67
TRUE	Empty	TGGT1_266970-t26_1-p1 | transcript=TGGT1_266970-t26_1 | gene=TGGT1_266970 | organism=Toxoplasma_gondii_GT1 | gene_product=hypothetical protein | transcript_product=hypothetical protein | location=TGGT1_chrIX:700995-702987(+) | protein_length=306 | sequence_SO=chromosome | SO=protein_coding | is_pseudo=false	TGGT1_266970-t26_1-p1	35 kDa	0.99911	10	1	29184340	35983210	38535690	0.79	0.32	0.35
TRUE	Empty	TGGT1_269460-t26_1-p1 | transcript=TGGT1_269460-t26_1 | gene=TGGT1_269460 | organism=Toxoplasma_gondii_GT1 | gene_product=Ser/Thr phosphatase family protein | transcript_product=Ser/Thr phosphatase family protein | location=TGGT1_chrVIII:5776112-5787896(+) | protein_length=2066 | sequence_SO=chromosome | SO=protein_coding | is_pseudo=false	TGGT1_269460-t26_1-p1	219 kDa	0.999093	10	1	1072599	1112952	886010	0.46	0.95	0.76
TRUE	Empty	TGGT1_289570-t26_1-p1 | transcript=TGGT1_289570-t26_1 | gene=TGGT1_289570 | organism=Toxoplasma_gondii_GT1 | gene_product=phosphatidylinositol transfer protein | transcript_product=phosphatidylinositol transfer protein | location=TGGT1_chrIX:3118897-3137754(+) | protein_length=1912 | sequence_SO=chromosome | SO=protein_coding | is_pseudo=false	TGGT1_289570-t26_1-p1	210 kDa	0.99899	10	1	1261997	1283754	1190557	0.84	0.96	0.88
TRUE	Empty	TGGT1_267080-t26_1-p1 | transcript=TGGT1_267080-t26_1 | gene=TGGT1_267080 | organism=Toxoplasma_gondii_GT1 | gene_product=putative 26S protease regulatory subunit 4 | transcript_product=putative 26S protease regulatory subunit 4 | location=TGGT1_chrIX:625144-630490(+) | protein_length=441 | sequence_SO=chromosome | SO=protein_coding | is_pseudo=false	TGGT1_267080-t26_1-p1	49 kDa	0.998976	10	0.9	1749536	1559833	1700335	0.53	0.51	0.82
TRUE	Empty	TGGT1_216060-t26_1-p1 | transcript=TGGT1_216060-t26_1 | gene=TGGT1_216060 | organism=Toxoplasma_gondii_GT1 | gene_product=hypothetical protein | transcript_product=hypothetical protein | location=TGGT1_chrXI:6344229-6346967(-) | protein_length=784 | sequence_SO=chromosome | SO=protein_coding | is_pseudo=false	TGGT1_216060-t26_1-p1	84 kDa	0.998968	10	1	2178773	1986502	2326050	0.56	0.53	0.81
TRUE	Empty	TGGT1_210730-t26_1-p1 | transcript=TGGT1_210730-t26_1 | gene=TGGT1_210730 | organism=Toxoplasma_gondii_GT1 | gene_product=putative ATP-dependent hsl protease ATP-binding subunit hslU | transcript_product=putative ATP-dependent hsl protease ATP-binding subunit hslU | location=TGGT1_chrIV:2033378-2047586(-) | protein_length=672 | sequence_SO=chromosome | SO=protein_coding | is_pseudo=false	TGGT1_210730-t26_1-p1	73 kDa	0.998958	10	1	3491217	3001763	3627310	0.32	0.64	0.91
TRUE	Empty	TGGT1_243410-t26_1-p1 | transcript=TGGT1_243410-t26_1 | gene=TGGT1_243410 | organism=Toxoplasma_gondii_GT1 | gene_product=tetratricopeptide repeat-containing protein | transcript_product=tetratricopeptide repeat-containing protein | location=TGGT1_chrVI:2533610-2536495(+) | protein_length=551 | sequence_SO=chromosome | SO=protein_coding | is_pseudo=false	TGGT1_243410-t26_1-p1	60 kDa	0.998906	10	1	2910373	2211682	3028196	0.18	0.079	0.8
TRUE	Empty	TGGT1_252340-t26_1-p1 | transcript=TGGT1_252340-t26_1 | gene=TGGT1_252340 | organism=Toxoplasma_gondii_GT1 | gene_product=hypothetical protein | transcript_product=hypothetical protein | location=TGGT1_chrIII:479884-486400(+) | protein_length=1243 | sequence_SO=chromosome | SO=protein_coding | is_pseudo=false	TGGT1_252340-t26_1-p1	139 kDa	0.998853	10	1	2067774	2022965	2245296	0.4	0.93	0.74
TRUE	Empty	TGGT1_213000-t26_1-p1 | transcript=TGGT1_213000-t26_1 | gene=TGGT1_213000 | organism=Toxoplasma_gondii_GT1 | gene_product=putative replication factor C, subunit 5 | transcript_product=putative replication factor C, subunit 5 | location=TGGT1_chrV:639318-648336(+) | protein_length=372 | sequence_SO=chromosome | SO=protein_coding | is_pseudo=false	TGGT1_213000-t26_1-p1	41 kDa	0.998822	10	1	2463199	1874269	3101729	0.19	0.093	0.49
TRUE	Empty	TGGT1_260310-t26_1-p1 | transcript=TGGT1_260310-t26_1 | gene=TGGT1_260310 | organism=Toxoplasma_gondii_GT1 | gene_product=ATP-binding cassette transporter ABC.B1 | transcript_product=ATP-binding cassette transporter ABC.B1 | location=TGGT1_chrVIIb:2334844-2358106(-) | protein_length=1345 | sequence_SO=chromosome | SO=protein_coding | is_pseudo=false	TGGT1_260310-t26_1-p1	144 kDa	0.998733	10	1	610877	578617	298634	0.11	0.83	0.1
TRUE	Empty	TGGT1_295125-t26_1-p1 | transcript=TGGT1_295125-t26_1 | gene=TGGT1_295125 | organism=Toxoplasma_gondii_GT1 | gene_product=rhoptry protein ROP4 | transcript_product=rhoptry protein ROP4 | location=TGGT1_chrIa:1394541-1396277(-) | protein_length=365 | sequence_SO=chromosome | SO=protein_coding | is_pseudo=false	TGGT1_295125-t26_1-p1	40 kDa	0.998706	10	0.4	5389172	5900616	4482125	0.33	0.72	0.53
TRUE	Empty	TGGT1_306660-t26_1-p1 | transcript=TGGT1_306660-t26_1 | gene=TGGT1_306660 | organism=Toxoplasma_gondii_GT1 | gene_product=RNA pseudouridine synthase superfamily protein | transcript_product=RNA pseudouridine synthase superfamily protein | location=TGGT1_chrIX:6025601-6045208(-) | protein_length=6535 | sequence_SO=chromosome | SO=protein_coding | is_pseudo=false	TGGT1_306660-t26_1-p1	676 kDa	0.998682	10	1	85214.9	108776	145915	0.79	0.71	0.68
TRUE	Empty	TGGT1_320050-t26_1-p1 | transcript=TGGT1_320050-t26_1 | gene=TGGT1_320050 | organism=Toxoplasma_gondii_GT1 | gene_product=ribosomal protein RPL5 | transcript_product=ribosomal protein RPL5 | location=TGGT1_chrIV:494655-497683(+) | protein_length=310 | sequence_SO=chromosome | SO=protein_coding | is_pseudo=false	TGGT1_320050-t26_1-p1	35 kDa	0.998674	10	1	12367670	12932910	13028900	0.97	0.89	0.85
TRUE	Empty	TGGT1_267710-t26_1-p1 | transcript=TGGT1_267710-t26_1 | gene=TGGT1_267710 | organism=Toxoplasma_gondii_GT1 | gene_product=CPSF A subunit region protein | transcript_product=CPSF A subunit region protein | location=TGGT1_chrIX:261380-276054(+) | protein_length=2072 | sequence_SO=chromosome | SO=protein_coding | is_pseudo=false	TGGT1_267710-t26_1-p1	223 kDa	0.998581	10	1	1215318	1044138	1190097	0.64	0.084	0.94
TRUE	Empty	TGGT1_235140-t26_1-p1 | transcript=TGGT1_235140-t26_1 | gene=TGGT1_235140 | organism=Toxoplasma_gondii_GT1 | gene_product=hypothetical protein | transcript_product=hypothetical protein | location=TGGT1_chrX:4531284-4533475(+) | protein_length=342 | sequence_SO=chromosome | SO=protein_coding | is_pseudo=false	TGGT1_235140-t26_1-p1	37 kDa	0.998445	10	1	5384252	5283693	5415229	0.93	0.81	0.98
TRUE	Empty	TGGT1_284780-t26_1-p1 | transcript=TGGT1_284780-t26_1 | gene=TGGT1_284780 | organism=Toxoplasma_gondii_GT1 | gene_product=hypothetical protein | transcript_product=hypothetical protein | location=TGGT1_chrV:2466672-2473545(+) | protein_length=1600 | sequence_SO=chromosome | SO=protein_coding | is_pseudo=false	TGGT1_284780-t26_1-p1	175 kDa	0.998386	10	1	1202361	1231418	798540	0.17	0.89	0.12
TRUE	Empty	TGGT1_291930-t26_1-p1 | transcript=TGGT1_291930-t26_1 | gene=TGGT1_291930 | organism=Toxoplasma_gondii_GT1 | gene_product=RNA recognition motif-containing protein | transcript_product=RNA recognition motif-containing protein | location=TGGT1_chrIX:4212023-4217780(+) | protein_length=705 | sequence_SO=chromosome | SO=protein_coding | is_pseudo=false	TGGT1_291930-t26_1-p1	73 kDa	0.998293	10	1	3835772	3665890	3661738	0.99	0.9	0.89
TRUE	Empty	TGGT1_201680-t26_1-p1 | transcript=TGGT1_201680-t26_1 | gene=TGGT1_201680 | organism=Toxoplasma_gondii_GT1 | gene_product=putative eukaryotic initiation factor-3 subunit 10 | transcript_product=putative eukaryotic initiation factor-3 subunit 10 | location=TGGT1_chrVIIa:3754116-3762345(+) | protein_length=1031 | sequence_SO=chromosome | SO=protein_coding | is_pseudo=false	TGGT1_201680-t26_1-p1	119 kDa	0.998237	10	1	1873014	1886630	1554290	0.21	0.97	0.38
TRUE	Empty	TGGT1_242330-t26_1-p1 | transcript=TGGT1_242330-t26_1 | gene=TGGT1_242330 | organism=Toxoplasma_gondii_GT1 | gene_product=ribosomal protein RPS5 | transcript_product=ribosomal protein RPS5 | location=TGGT1_chrVI:1882939-1884008(-) | protein_length=192 | sequence_SO=chromosome | SO=protein_coding | is_pseudo=false	TGGT1_242330-t26_1-p1	22 kDa	0.997968	8	1	13486670	14970050	14583740	0.86	0.61	0.65
TRUE	Empty	TGGT1_255340-t26_1-p1 | transcript=TGGT1_255340-t26_1 | gene=TGGT1_255340 | organism=Toxoplasma_gondii_GT1 | gene_product=tetratricopeptide repeat-containing protein | transcript_product=tetratricopeptide repeat-containing protein | location=TGGT1_chrVIIb:4796393-4804342(+) | protein_length=1696 | sequence_SO=chromosome | SO=protein_coding | is_pseudo=false	TGGT1_255340-t26_1-p1	185 kDa	0.997899	10	1	2809885	3020084	3055690	0.96	0.76	0.73
TRUE	Empty	TGGT1_312050-t26_1-p1 | transcript=TGGT1_312050-t26_1 | gene=TGGT1_312050 | organism=Toxoplasma_gondii_GT1 | gene_product=putative small GTPase Rab2 | transcript_product=putative small GTPase Rab2 | location=TGGT1_chrXI:2359586-2364079(+) | protein_length=214 | sequence_SO=chromosome | SO=protein_coding | is_pseudo=false	TGGT1_312050-t26_1-p1	24 kDa	0.997855	10	1	3942778	3858929	3689172	0.45	0.92	0.74
TRUE	Empty	TGGT1_261570-t26_1-p1 | transcript=TGGT1_261570-t26_1 | gene=TGGT1_261570 | organism=Toxoplasma_gondii_GT1 | gene_product=ribosomal protein RPL7A | transcript_product=ribosomal protein RPL7A | location=TGGT1_chrVIIb:1628077-1630958(+) | protein_length=276 | sequence_SO=chromosome | SO=protein_coding | is_pseudo=false	TGGT1_261570-t26_1-p1	31 kDa	0.997743	10	1	14948040	17834610	15885480	0.13	0.41	0.74
TRUE	Empty	TGGT1_258130-t26_1-p1 | transcript=TGGT1_258130-t26_1 | gene=TGGT1_258130 | organism=Toxoplasma_gondii_GT1 | gene_product=Rab1 protein | transcript_product=Rab1 protein | location=TGGT1_chrVIIb:3520118-3526101(+) | protein_length=216 | sequence_SO=chromosome | SO=protein_coding | is_pseudo=false	TGGT1_258130-t26_1-p1	24 kDa	0.997646	10	0.9	8081326	7380825	7507213	0.88	0.69	0.71
TRUE	Empty	TGGT1_271820-t26_1-p1 | transcript=TGGT1_271820-t26_1 | gene=TGGT1_271820 | organism=Toxoplasma_gondii_GT1 | gene_product=lipoyltransferase and lipoate-protein ligase subfamily protein | transcript_product=lipoyltransferase and lipoate-protein ligase subfamily protein | location=TGGT1_chrVIII:4339237-4344432(+) | protein_length=476 | sequence_SO=chromosome | SO=protein_coding | is_pseudo=false	TGGT1_271820-t26_1-p1	53 kDa	0.997553	10	1	3503647	3897653	3040617	0.016	0.27	0.2
TRUE	Empty	TGGT1_410360-t26_1-p1 | transcript=TGGT1_410360-t26_1 | gene=TGGT1_410360 | organism=Toxoplasma_gondii_GT1 | gene_product=putative transmembrane protein | transcript_product=putative transmembrane protein | location=TGGT1_chrII:71310-72374(+) | protein_length=354 | sequence_SO=chromosome | SO=protein_coding | is_pseudo=false	TGGT1_410360-t26_1-p1	38 kDa	0.997343	10	0.3	4510428	4177797	3881476	0.53	0.44	0.27
TRUE	Empty	TGGT1_287180-t26_1-p1 | transcript=TGGT1_287180-t26_1 | gene=TGGT1_287180 | organism=Toxoplasma_gondii_GT1 | gene_product=hypothetical protein | transcript_product=hypothetical protein | location=TGGT1_chrV:1391105-1404550(+) | protein_length=2072 | sequence_SO=chromosome | SO=protein_coding | is_pseudo=false	TGGT1_287180-t26_1-p1	227 kDa	0.997287	10	1	1355603	1067041	1117235	0.7	0.047	0.21
TRUE	Empty	TGGT1_269980-t26_1-p1 | transcript=TGGT1_269980-t26_1 | gene=TGGT1_269980 | organism=Toxoplasma_gondii_GT1 | gene_product=putative preprotein translocase Sec61 | transcript_product=putative preprotein translocase Sec61 | location=TGGT1_chrVIII:5481592-5486135(-) | protein_length=473 | sequence_SO=chromosome | SO=protein_coding | is_pseudo=false	TGGT1_269980-t26_1-p1	52 kDa	0.997159	10	1	103286600	96400090	109853900	0.22	0.73	0.76
TRUE	Empty	TGGT1_237220-t26_1-p1 | transcript=TGGT1_237220-t26_1 | gene=TGGT1_237220 | organism=Toxoplasma_gondii_GT1 | gene_product=putative DNA replication licensing factor Mcm7 | transcript_product=putative DNA replication licensing factor Mcm7 | location=TGGT1_chrX:5679145-5687290(+) | protein_length=865 | sequence_SO=chromosome | SO=protein_coding | is_pseudo=false	TGGT1_237220-t26_1-p1	97 kDa	0.997102	10	1	623638	674864	587616	0.67	0.83	0.89
TRUE	Empty	TGGT1_225260-t26_1-p1 | transcript=TGGT1_225260-t26_1 | gene=TGGT1_225260 | organism=Toxoplasma_gondii_GT1 | gene_product=DNA-directed RNA polymerase II RPB1 | transcript_product=DNA-directed RNA polymerase II RPB1 | location=TGGT1_chrX:2272062-2277823(+) | protein_length=1073 | sequence_SO=chromosome | SO=protein_coding | is_pseudo=false	TGGT1_225260-t26_1-p1	121 kDa	0.997055	10	1	816061	1281232	445074	0.21	0.32	0.33
TRUE	Empty	TGGT1_209280-t26_1-p1 | transcript=TGGT1_209280-t26_1 | gene=TGGT1_209280 | organism=Toxoplasma_gondii_GT1 | gene_product=hypothetical protein | transcript_product=hypothetical protein | location=TGGT1_chrIb:1194711-1203766(+) | protein_length=1602 | sequence_SO=chromosome | SO=protein_coding | is_pseudo=false	TGGT1_209280-t26_1-p1	179 kDa	0.996964	10	1	2237824	1932566	1728521	0.88	0.48	0.73
TRUE	Empty	TGGT1_297530-t26_1-p1 | transcript=TGGT1_297530-t26_1 | gene=TGGT1_297530 | organism=Toxoplasma_gondii_GT1 | gene_product=DNA-directed RNA polymerase I RPA2 | transcript_product=DNA-directed RNA polymerase I RPA2 | location=TGGT1_chrII:1838888-1855349(+) | protein_length=1278 | sequence_SO=chromosome | SO=protein_coding | is_pseudo=false	TGGT1_297530-t26_1-p1	141 kDa	0.996701	10	1	3668467	4429860	3048285	0.34	0.54	0.66
TRUE	Empty	TGGT1_301180-t26_1-p1 | transcript=TGGT1_301180-t26_1 | gene=TGGT1_301180 | organism=Toxoplasma_gondii_GT1 | gene_product=SAG-related sequence SRS19F | transcript_product=SAG-related sequence SRS19F | location=TGGT1_chrIV:2185215-2186390(-) | protein_length=391 | sequence_SO=chromosome | SO=protein_coding | is_pseudo=false	TGGT1_301180-t26_1-p1	41 kDa	0.996561	10	0.9	4780910	3775678	5478995	0.17	0.13	0.57
TRUE	Empty	TGGT1_231070-t26_1-p1 | transcript=TGGT1_231070-t26_1 | gene=TGGT1_231070 | organism=Toxoplasma_gondii_GT1 | gene_product=protein kinase | transcript_product=protein kinase | location=TGGT1_chrVIII:1218431-1222387(+) | protein_length=1318 | sequence_SO=chromosome | SO=protein_coding | is_pseudo=false	TGGT1_231070-t26_1-p1	141 kDa	0.996501	10	1	2053421	2374297	1982245	0.084	0.4	0.81
TRUE	Empty	TGGT1_201150-t26_1-p1 | transcript=TGGT1_201150-t26_1 | gene=TGGT1_201150 | organism=Toxoplasma_gondii_GT1 | gene_product=heavy metal translocating P-type ATPase subfamily protein | transcript_product=heavy metal translocating P-type ATPase subfamily protein | location=TGGT1_chrVIIa:3895489-3905933(+) | protein_length=1965 | sequence_SO=chromosome | SO=protein_coding | is_pseudo=false	TGGT1_201150-t26_1-p1	207 kDa	0.995904	10	1	720340	772632	618512	0.13	0.32	0.17
TRUE	Empty	TGGT1_258240-t26_1-p1 | transcript=TGGT1_258240-t26_1 | gene=TGGT1_258240 | organism=Toxoplasma_gondii_GT1 | gene_product=chromodomain helicase DNA binding protein CHD1/SWI2/SNF2 | transcript_product=chromodomain helicase DNA binding protein CHD1/SWI2/SNF2 | location=TGGT1_chrVIIb:3435272-3453383(-) | protein_length=2495 | sequence_SO=chromosome | SO=protein_coding | is_pseudo=false	TGGT1_258240-t26_1-p1	272 kDa	0.995714	10	1	5327944	2460134	2552172	0.98	0.49	0.57
TRUE	Empty	TGGT1_266760-t26_1-p1 | transcript=TGGT1_266760-t26_1 | gene=TGGT1_266760 | organism=Toxoplasma_gondii_GT1 | gene_product=isocitrate dehydrogenase | transcript_product=isocitrate dehydrogenase | location=TGGT1_chrIX:812189-815264(-) | protein_length=594 | sequence_SO=chromosome | SO=protein_coding | is_pseudo=false	TGGT1_266760-t26_1-p1	66 kDa	0.994035	10	0.9	4287273	3918790	4100185	0.87	0.028	0.87
TRUE	Empty	TGGT1_229630-t26_1-p1 | transcript=TGGT1_229630-t26_1 | gene=TGGT1_229630 | organism=Toxoplasma_gondii_GT1 | gene_product=eIF2 kinase IF2K-A (incomplete catalytic triad) | transcript_product=eIF2 kinase IF2K-A (incomplete catalytic triad) | location=TGGT1_chrVIII:323939-342025(+) | protein_length=4638 | sequence_SO=chromosome | SO=protein_coding | is_pseudo=false	TGGT1_229630-t26_1-p1	493 kDa	0.992926	10	1	3316711	3295986	3061779	0.71	0.95	0.68
TRUE	Empty	TGGT1_290640-t26_1-p1 | transcript=TGGT1_290640-t26_1 | gene=TGGT1_290640 | organism=Toxoplasma_gondii_GT1 | gene_product=putative DNA mismatch repair protein MSH6-1 | transcript_product=putative DNA mismatch repair protein MSH6-1 | location=TGGT1_chrIX:3604395-3616262(-) | protein_length=1561 | sequence_SO=chromosome | SO=protein_coding | is_pseudo=false	TGGT1_290640-t26_1-p1	172 kDa	0.990761	10	1	649619	748198	949304	0.41	0.69	0.28
TRUE	Empty	TGGT1_312190-t26_1-p1 | transcript=TGGT1_312190-t26_1 | gene=TGGT1_312190 | organism=Toxoplasma_gondii_GT1 | gene_product=hypothetical protein | transcript_product=hypothetical protein | location=TGGT1_chrXI:2440335-2454944(+) | protein_length=2274 | sequence_SO=chromosome | SO=protein_coding | is_pseudo=false	TGGT1_312190-t26_1-p1	249 kDa	0.989177	10	1	381748	401851	450216	0.45	0.89	0.68
TRUE	Empty	TGGT1_294630-t26_1-p1 | transcript=TGGT1_294630-t26_1 | gene=TGGT1_294630 | organism=Toxoplasma_gondii_GT1 | gene_product=hypothetical protein | transcript_product=hypothetical protein | location=TGGT1_chrIa:1000668-1009643(+) | protein_length=880 | sequence_SO=chromosome | SO=protein_coding | is_pseudo=false	TGGT1_294630-t26_1-p1	96 kDa	0.986363	10	1	3242589	3523964	11579360	0.29	0.88	0.28
TRUE	Empty	TGGT1_312270-t26_1-p1 | transcript=TGGT1_312270-t26_1 | gene=TGGT1_312270 | organism=Toxoplasma_gondii_GT1 | gene_product=rhoptry protein ROP13 | transcript_product=rhoptry protein ROP13 | location=TGGT1_chrXI:2519556-2520758(-) | protein_length=400 | sequence_SO=chromosome | SO=protein_coding | is_pseudo=false	TGGT1_312270-t26_1-p1	45 kDa	1	8	1	14029470	15664510	12131190	0.1	0.43	0.35
TRUE	Empty	TGGT1_218240-t26_1-p1 | transcript=TGGT1_218240-t26_1 | gene=TGGT1_218240 | organism=Toxoplasma_gondii_GT1 | gene_product=hypothetical protein | transcript_product=hypothetical protein | location=TGGT1_chrXII:1592419-1596488(-) | protein_length=1249 | sequence_SO=chromosome | SO=protein_coding | is_pseudo=false	TGGT1_218240-t26_1-p1	133 kDa	0.999996	9	1	4741812	4999032	4006693	0.37	0.81	0.32
TRUE	Empty	TGGT1_293440-t26_1-p1 | transcript=TGGT1_293440-t26_1 | gene=TGGT1_293440 | organism=Toxoplasma_gondii_GT1 | gene_product=hypothetical protein | transcript_product=hypothetical protein | location=TGGT1_chrIa:306622-308238(-) | protein_length=538 | sequence_SO=chromosome | SO=protein_coding | is_pseudo=false	TGGT1_293440-t26_1-p1	59 kDa	0.999996	9	1	6919292	7328089	5845426	0.37	0.67	0.42
TRUE	Empty	TGGT1_251930-t26_1-p1 | transcript=TGGT1_251930-t26_1 | gene=TGGT1_251930 | organism=Toxoplasma_gondii_GT1 | gene_product=enoyl-acyl carrier reductase ENR | transcript_product=enoyl-acyl carrier reductase ENR | location=TGGT1_chrXII:5592481-5595811(+) | protein_length=417 | sequence_SO=chromosome | SO=protein_coding | is_pseudo=false	TGGT1_251930-t26_1-p1	44 kDa	0.999975	9	1	11464010	11738420	10937100	0.56	0.9	0.8
TRUE	Empty	TGGT1_315490-t26_1-p1 | transcript=TGGT1_315490-t26_1 | gene=TGGT1_315490 | organism=Toxoplasma_gondii_GT1 | gene_product=rhoptry protein ROP10 | transcript_product=rhoptry protein ROP10 | location=TGGT1_chrXI:4696632-4698392(-) | protein_length=586 | sequence_SO=chromosome | SO=protein_coding | is_pseudo=false	TGGT1_315490-t26_1-p1	61 kDa	0.999958	9	1	4739615	5598666	3946581	0.41	0.56	0.59
TRUE	Empty	TGGT1_270240-t26_1-p1 | transcript=TGGT1_270240-t26_1 | gene=TGGT1_270240 | organism=Toxoplasma_gondii_GT1 | gene_product=MAG1 protein | transcript_product=MAG1 protein | location=TGGT1_chrVIII:5310162-5311630(+) | protein_length=452 | sequence_SO=chromosome | SO=protein_coding | is_pseudo=false	TGGT1_270240-t26_1-p1	49 kDa	0.999952	9	1	20878570	16718300	18014150	0.41	0.11	0.23
TRUE	Empty	TGGT1_297650-t26_1-p1 | transcript=TGGT1_297650-t26_1 | gene=TGGT1_297650 | organism=Toxoplasma_gondii_GT1 | gene_product=Ser/Thr phosphatase family protein | transcript_product=Ser/Thr phosphatase family protein | location=TGGT1_chrII:1870431-1877352(-) | protein_length=651 | sequence_SO=chromosome | SO=protein_coding | is_pseudo=false	TGGT1_297650-t26_1-p1	73 kDa	0.999944	9	1	2980329	3441207	2327629	0.089	0.46	0.22
TRUE	Empty	TGGT1_263580-t26_1-p1 | transcript=TGGT1_263580-t26_1 | gene=TGGT1_263580 | organism=Toxoplasma_gondii_GT1 | gene_product=bromodomain-containing protein | transcript_product=bromodomain-containing protein | location=TGGT1_chrVIIb:436676-440888(+) | protein_length=714 | sequence_SO=chromosome | SO=protein_coding | is_pseudo=false	TGGT1_263580-t26_1-p1	76 kDa	0.999895	9	1	628800	701972	614040	0.74	0.81	0.97
TRUE	Empty	TGGT1_308920-t26_1-p1 | transcript=TGGT1_308920-t26_1 | gene=TGGT1_308920 | organism=Toxoplasma_gondii_GT1 | gene_product=splicing factor U2AF protein | transcript_product=splicing factor U2AF protein | location=TGGT1_chrXI:318912-325751(-) | protein_length=770 | sequence_SO=chromosome | SO=protein_coding | is_pseudo=false	TGGT1_308920-t26_1-p1	83 kDa	0.999892	9	1	28783030	28017090	37091140	0.48	0.92	0.48
TRUE	Empty	TGGT1_225160-t26_1-p1 | transcript=TGGT1_225160-t26_1 | gene=TGGT1_225160 | organism=Toxoplasma_gondii_GT1 | gene_product=hypothetical protein | transcript_product=hypothetical protein | location=TGGT1_chrX:2354594-2355799(+) | protein_length=401 | sequence_SO=chromosome | SO=protein_coding | is_pseudo=false	TGGT1_225160-t26_1-p1	45 kDa	0.999891	9	1	2857251	3067819	3129946	0.8	0.53	0.43
TRUE	Empty	TGGT1_305520-t26_1-p1 | transcript=TGGT1_305520-t26_1 | gene=TGGT1_305520 | organism=Toxoplasma_gondii_GT1 | gene_product=ribosomal protein RPS2 | transcript_product=ribosomal protein RPS2 | location=TGGT1_chrIX:5229307-5231745(+) | protein_length=269 | sequence_SO=chromosome | SO=protein_coding | is_pseudo=false	TGGT1_305520-t26_1-p1	29 kDa	0.999875	9	1	7175176	9267301	8689645	0.46	0.019	0.11
TRUE	Empty	TGGT1_290600-t26_1-p1 | transcript=TGGT1_290600-t26_1 | gene=TGGT1_290600 | organism=Toxoplasma_gondii_GT1 | gene_product=succinyl-CoA-synthetase alpha SCSA | transcript_product=succinyl-CoA-synthetase alpha SCSA | location=TGGT1_chrIX:3568986-3572521(+) | protein_length=333 | sequence_SO=chromosome | SO=protein_coding | is_pseudo=false	TGGT1_290600-t26_1-p1	35 kDa	0.999869	9	1	20225430	23989810	17952050	0.15	0.12	0.49
TRUE	Empty	TGGT1_220600-t26_1-p1 | transcript=TGGT1_220600-t26_1 | gene=TGGT1_220600 | organism=Toxoplasma_gondii_GT1 | gene_product=hypothetical protein | transcript_product=hypothetical protein | location=TGGT1_chrV:381369-385088(+) | protein_length=755 | sequence_SO=chromosome | SO=protein_coding | is_pseudo=false	TGGT1_220600-t26_1-p1	82 kDa	0.999858	9	1	2097611	2328662	1910871	0.27	0.33	0.5
TRUE	Empty	TGGT1_262910-t26_1-p1 | transcript=TGGT1_262910-t26_1 | gene=TGGT1_262910 | organism=Toxoplasma_gondii_GT1 | gene_product=putative NADH-cytochrome b5 reductase 1 | transcript_product=putative NADH-cytochrome b5 reductase 1 | location=TGGT1_chrVIIb:908592-911184(-) | protein_length=339 | sequence_SO=chromosome | SO=protein_coding | is_pseudo=false	TGGT1_262910-t26_1-p1	38 kDa	0.999856	9	1	7786566	7409040	7930430	0.0023	0.82	0.93
TRUE	Empty	TGGT1_262070-t26_1-p1 | transcript=TGGT1_262070-t26_1 | gene=TGGT1_262070 | organism=Toxoplasma_gondii_GT1 | gene_product=putative ribosomal rna assembly protein mis3 | transcript_product=putative ribosomal rna assembly protein mis3 | location=TGGT1_chrVIIb:1365066-1371076(-) | protein_length=394 | sequence_SO=chromosome | SO=protein_coding | is_pseudo=false	TGGT1_262070-t26_1-p1	45 kDa	0.999843	9	1	1419732	1592835	1150007	0.66	0.79	0.74
TRUE	Empty	TGGT1_308000-t26_1-p1 | transcript=TGGT1_308000-t26_1 | gene=TGGT1_308000 | organism=Toxoplasma_gondii_GT1 | gene_product=Gpi16 subunit, GPI transamidase component protein | transcript_product=Gpi16 subunit, GPI transamidase component protein | location=TGGT1_chrXII:440678-448410(+) | protein_length=769 | sequence_SO=chromosome | SO=protein_coding | is_pseudo=false	TGGT1_308000-t26_1-p1	84 kDa	0.999823	9	1	3633045	3537936	3061349	0.52	0.9	0.59
TRUE	Empty	TGGT1_259710-t26_1-p1 | transcript=TGGT1_259710-t26_1 | gene=TGGT1_259710 | organism=Toxoplasma_gondii_GT1 | gene_product=protein kinase | transcript_product=protein kinase | location=TGGT1_chrVIIb:2674298-2677675(+) | protein_length=251 | sequence_SO=chromosome | SO=protein_coding | is_pseudo=false	TGGT1_259710-t26_1-p1	29 kDa	0.999807	9	1	1429474	2026317	1207174	0.22	0.0097	0.62
TRUE	Empty	TGGT1_270510-t26_1-p1 | transcript=TGGT1_270510-t26_1 | gene=TGGT1_270510 | organism=Toxoplasma_gondii_GT1 | gene_product=asparaginyl-tRNA synthetase (NOB+tRNA synthase) | transcript_product=asparaginyl-tRNA synthetase (NOB+tRNA synthase) | location=TGGT1_chrVIII:5218409-5221722(+) | protein_length=676 | sequence_SO=chromosome | SO=protein_coding | is_pseudo=false	TGGT1_270510-t26_1-p1	75 kDa	0.999754	9	1	6747243	6573594	7981032	0.59	0.92	0.55
TRUE	Empty	TGGT1_275990-t26_1-p1 | transcript=TGGT1_275990-t26_1 | gene=TGGT1_275990 | organism=Toxoplasma_gondii_GT1 | gene_product=hypothetical protein | transcript_product=hypothetical protein | location=TGGT1_chrIII:142724-149395(+) | protein_length=1172 | sequence_SO=chromosome | SO=protein_coding | is_pseudo=false	TGGT1_275990-t26_1-p1	126 kDa	0.999748	9	1	1625977	2069171	1516510	0.14	0.012	0.65
TRUE	Empty	TGGT1_309140-t26_1-p1 | transcript=TGGT1_309140-t26_1 | gene=TGGT1_309140 | organism=Toxoplasma_gondii_GT1 | gene_product=transducin beta-like protein TBL1 | transcript_product=transducin beta-like protein TBL1 | location=TGGT1_chrXI:481159-487842(+) | protein_length=794 | sequence_SO=chromosome | SO=protein_coding | is_pseudo=false	TGGT1_309140-t26_1-p1	85 kDa	0.999673	9	1	827277	717613	736915	0.53	0.52	0.59
TRUE	Empty	TGGT1_321560-t26_1-p1 | transcript=TGGT1_321560-t26_1 | gene=TGGT1_321560 | organism=Toxoplasma_gondii_GT1 | gene_product=zinc knuckle domain-containing protein | transcript_product=zinc knuckle domain-containing protein | location=TGGT1_chrIb:1734731-1743752(+) | protein_length=770 | sequence_SO=chromosome | SO=protein_coding | is_pseudo=false	TGGT1_321560-t26_1-p1	85 kDa	0.99954	9	1	4456124	4735433	5223170	0.74	0.7	0.57
TRUE	Empty	TGGT1_216730-t26_1-p1 | transcript=TGGT1_216730-t26_1 | gene=TGGT1_216730 | organism=Toxoplasma_gondii_GT1 | gene_product=MCM2/3/5 family protein | transcript_product=MCM2/3/5 family protein | location=TGGT1_chrXI:5853958-5863220(-) | protein_length=1028 | sequence_SO=chromosome | SO=protein_coding | is_pseudo=false	TGGT1_216730-t26_1-p1	113 kDa	0.999485	9	1	573170	1086147	704231	0.32	0.24	0.72
TRUE	Empty	TGGT1_290920-t26_1-p1 | transcript=TGGT1_290920-t26_1 | gene=TGGT1_290920 | organism=Toxoplasma_gondii_GT1 | gene_product=oxidoreductase, 2OG-Fe(II) oxygenase family protein | transcript_product=oxidoreductase, 2OG-Fe(II) oxygenase family protein | location=TGGT1_chrIX:3746594-3750759(+) | protein_length=967 | sequence_SO=chromosome | SO=protein_coding | is_pseudo=false	TGGT1_290920-t26_1-p1	101 kDa	0.999459	9	1	2906503	2600736	4012790	0.12	0.42	0.19
TRUE	Empty	TGGT1_224900-t26_1-p1 | transcript=TGGT1_224900-t26_1 | gene=TGGT1_224900 | organism=Toxoplasma_gondii_GT1 | gene_product=putative adenylate kinase | transcript_product=putative adenylate kinase | location=TGGT1_chrX:2611933-2614564(+) | protein_length=257 | sequence_SO=chromosome | SO=protein_coding | is_pseudo=false	TGGT1_224900-t26_1-p1	29 kDa	0.999448	9	1	5985850	7007774	5255447	0.14	0.31	0.39
TRUE	Empty	TGGT1_253650-t26_1-p1 | transcript=TGGT1_253650-t26_1 | gene=TGGT1_253650 | organism=Toxoplasma_gondii_GT1 | gene_product=DnaJ C terminal region domain-containing protein | transcript_product=DnaJ C terminal region domain-containing protein | location=TGGT1_chrIII:1063337-1067055(-) | protein_length=712 | sequence_SO=chromosome | SO=protein_coding | is_pseudo=false	TGGT1_253650-t26_1-p1	76 kDa	0.999379	9	1	2951697	2969967	3000732	0.93	0.98	0.95
TRUE	Empty	TGGT1_221470-t26_1-p1 | transcript=TGGT1_221470-t26_1 | gene=TGGT1_221470 | organism=Toxoplasma_gondii_GT1 | gene_product=hypothetical protein | transcript_product=hypothetical protein | location=TGGT1_chrII:360683-367434(+) | protein_length=552 | sequence_SO=chromosome | SO=protein_coding | is_pseudo=false	TGGT1_221470-t26_1-p1	62 kDa	0.999353	9	1	925952	748426	774142	0.92	0.44	0.61
TRUE	Empty	TGGT1_218410-t26_1-p1 | transcript=TGGT1_218410-t26_1 | gene=TGGT1_218410 | organism=Toxoplasma_gondii_GT1 | gene_product=ribosomal protein RPP0 | transcript_product=ribosomal protein RPP0 | location=TGGT1_chrXII:1471598-1473146(+) | protein_length=314 | sequence_SO=chromosome | SO=protein_coding | is_pseudo=false	TGGT1_218410-t26_1-p1	34 kDa	0.999261	9	1	22851230	26671320	25234330	0.5	0.33	0.54
TRUE	Empty	TGGT1_234610-t26_1-p1 | transcript=TGGT1_234610-t26_1 | gene=TGGT1_234610 | organism=Toxoplasma_gondii_GT1 | gene_product=WD-40 repeat protein | transcript_product=WD-40 repeat protein | location=TGGT1_chrX:4387954-4395568(+) | protein_length=702 | sequence_SO=chromosome | SO=protein_coding | is_pseudo=false	TGGT1_234610-t26_1-p1	76 kDa	0.999246	9	1	10123660	9794689	10045890	0.93	0.84	0.98
TRUE	Empty	TGGT1_300310-t26_1-p1 | transcript=TGGT1_300310-t26_1 | gene=TGGT1_300310 | organism=Toxoplasma_gondii_GT1 | gene_product=26S proteasome regulatory subunit, S6a family AAA ATpase | transcript_product=26S proteasome regulatory subunit, S6a family AAA ATpase | location=TGGT1_chrXII:55218-62332(-) | protein_length=427 | sequence_SO=chromosome | SO=protein_coding | is_pseudo=false	TGGT1_300310-t26_1-p1	48 kDa	0.999207	9	1	1689516	1858098	1763830	0.83	0.56	0.87
TRUE	Empty	TGGT1_228630-t26_1-p1 | transcript=TGGT1_228630-t26_1 | gene=TGGT1_228630 | organism=Toxoplasma_gondii_GT1 | gene_product=hypothetical protein | transcript_product=hypothetical protein | location=TGGT1_chrX:179956-182506(+) | protein_length=328 | sequence_SO=chromosome | SO=protein_coding | is_pseudo=false	TGGT1_228630-t26_1-p1	35 kDa	0.999081	9	1	9740691	10322830	11987980	0.34	0.65	0.14
TRUE	Empty	TGGT1_305940-t26_1-p1 | transcript=TGGT1_305940-t26_1 | gene=TGGT1_305940 | organism=Toxoplasma_gondii_GT1 | gene_product=peptidyl-prolyl cis-trans isomerase, cyclophilin-type domain-containing protein | transcript_product=peptidyl-prolyl cis-trans isomerase, cyclophilin-type domain-containing protein | location=TGGT1_chrIX:5461956-5468636(+) | protein_length=612 | sequence_SO=chromosome | SO=pro…	TGGT1_305940-t26_1-p1	69 kDa	0.998923	9	1	7451978	7083678	9242284	0.19	0.61	0.28
TRUE	Empty	TGGT1_217510-t26_1-p1 | transcript=TGGT1_217510-t26_1 | gene=TGGT1_217510 | organism=Toxoplasma_gondii_GT1 | gene_product=hypothetical protein | transcript_product=hypothetical protein | location=TGGT1_chrXII:1824650-1826480(+) | protein_length=380 | sequence_SO=chromosome | SO=protein_coding | is_pseudo=false	TGGT1_217510-t26_1-p1	42 kDa	0.998897	9	1	2987235	3541799	2160307	0.028	0.36	0.11
TRUE	Empty	TGGT1_320020-t26_1-p1 | transcript=TGGT1_320020-t26_1 | gene=TGGT1_320020 | organism=Toxoplasma_gondii_GT1 | gene_product=transporter, major facilitator family protein | transcript_product=transporter, major facilitator family protein | location=TGGT1_chrIV:518139-519905(-) | protein_length=588 | sequence_SO=chromosome | SO=protein_coding | is_pseudo=false	TGGT1_320020-t26_1-p1	63 kDa	0.998853	8	1	9878150	11673640	9092534	0.23	0.15	0.66
TRUE	Empty	TGGT1_293430-t26_1-p1 | transcript=TGGT1_293430-t26_1 | gene=TGGT1_293430 | organism=Toxoplasma_gondii_GT1 | gene_product=hypothetical protein | transcript_product=hypothetical protein | location=TGGT1_chrIa:302881-304116(-) | protein_length=411 | sequence_SO=chromosome | SO=protein_coding | is_pseudo=false	TGGT1_293430-t26_1-p1	45 kDa	0.998848	9	1	4828128	6200777	4233071	0.067	0.15	0.45
TRUE	Empty	TGGT1_249610-t26_1-p1 | transcript=TGGT1_249610-t26_1 | gene=TGGT1_249610 | organism=Toxoplasma_gondii_GT1 | gene_product=hypothetical protein | transcript_product=hypothetical protein | location=TGGT1_chrXII:4618068-4627870(-) | protein_length=1208 | sequence_SO=chromosome | SO=protein_coding | is_pseudo=false	TGGT1_249610-t26_1-p1	137 kDa	0.998801	9	1	654918	706527	511315	0.071	0.88	0.62
TRUE	Empty	TGGT1_252440-t26_1-p1 | transcript=TGGT1_252440-t26_1 | gene=TGGT1_252440 | organism=Toxoplasma_gondii_GT1 | gene_product=peptidase c13 family protein | transcript_product=peptidase c13 family protein | location=TGGT1_chrIII:556677-558320(-) | protein_length=547 | sequence_SO=chromosome | SO=protein_coding | is_pseudo=false	TGGT1_252440-t26_1-p1	60 kDa	0.998779	9	1	3734236	3999511	3674413	0.65	0.14	0.93
TRUE	Empty	TGGT1_230980-t26_1-p1 | transcript=TGGT1_230980-t26_1 | gene=TGGT1_230980 | organism=Toxoplasma_gondii_GT1 | gene_product=myosin I | transcript_product=myosin I | location=TGGT1_chrVIII:1151501-1167169(-) | protein_length=1821 | sequence_SO=chromosome | SO=protein_coding | is_pseudo=false	TGGT1_230980-t26_1-p1	201 kDa	0.998778	9	1	646726	433088	595621	0.47	0.33	0.74
TRUE	Empty	TGGT1_213900-t26_1-p1 | transcript=TGGT1_213900-t26_1 | gene=TGGT1_213900 | organism=Toxoplasma_gondii_GT1 | gene_product=regulator of chromosome condensation RCC1 | transcript_product=regulator of chromosome condensation RCC1 | location=TGGT1_chrV:1284029-1290918(-) | protein_length=1155 | sequence_SO=chromosome | SO=protein_coding | is_pseudo=false	TGGT1_213900-t26_1-p1	123 kDa	0.998696	9	1	3411892	2529297	3398805	0.11	0.16	0.98
TRUE	Empty	TGGT1_324600-t26_1-p1 | transcript=TGGT1_324600-t26_1 | gene=TGGT1_324600 | organism=Toxoplasma_gondii_GT1 | gene_product=heat shock protein | transcript_product=heat shock protein | location=TGGT1_chrVIII:2284363-2285174(-) | protein_length=185 | sequence_SO=chromosome | SO=protein_coding | is_pseudo=false	TGGT1_324600-t26_1-p1	20 kDa	0.998642	9	1	41299050	37967580	30723020	0.024	0.64	0.19
TRUE	Empty	TGGT1_256090-t26_1-p1 | transcript=TGGT1_256090-t26_1 | gene=TGGT1_256090 | organism=Toxoplasma_gondii_GT1 | gene_product=glycerophosphodiester phosphodiesterase family protein | transcript_product=glycerophosphodiester phosphodiesterase family protein | location=TGGT1_chrVIIb:4433438-4434541(+) | protein_length=367 | sequence_SO=chromosome | SO=protein_coding | is_pseudo=false	TGGT1_256090-t26_1-p1	42 kDa	0.998574	9	1	3518423	3175398	2668315	0.14	0.28	0.062
TRUE	Empty	TGGT1_305160-t26_1-p1 | transcript=TGGT1_305160-t26_1 | gene=TGGT1_305160 | organism=Toxoplasma_gondii_GT1 | gene_product=histone H2Ba | transcript_product=histone H2Ba | location=TGGT1_chrIX:5039074-5039424(+) | protein_length=116 | sequence_SO=chromosome | SO=protein_coding | is_pseudo=false	TGGT1_305160-t26_1-p1	13 kDa	0.998232	6	1	334074800	430056800	477339400	0.62	0.54	0.43
TRUE	Empty	TGGT1_229950-t26_1-p1 | transcript=TGGT1_229950-t26_1 | gene=TGGT1_229950 | organism=Toxoplasma_gondii_GT1 | gene_product=putative 26S proteasome regulatory subunit 6b | transcript_product=putative 26S proteasome regulatory subunit 6b | location=TGGT1_chrVIII:482161-488358(+) | protein_length=409 | sequence_SO=chromosome | SO=protein_coding | is_pseudo=false	TGGT1_229950-t26_1-p1	46 kDa	0.997918	9	0.89	608466	619082	669500	0.63	0.94	0.58
TRUE	Empty	TGGT1_258060-t26_1-p1 | transcript=TGGT1_258060-t26_1 | gene=TGGT1_258060 | organism=Toxoplasma_gondii_GT1 | gene_product=putative myosin heavy chain | transcript_product=putative myosin heavy chain | location=TGGT1_chrVIIb:3580390-3584438(+) | protein_length=208 | sequence_SO=chromosome | SO=protein_coding | is_pseudo=false	TGGT1_258060-t26_1-p1	23 kDa	0.997848	9	1	9097367	10068470	8617890	0.58	0.31	0.83
TRUE	Empty	TGGT1_203370-t26_1-p1 | transcript=TGGT1_203370-t26_1 | gene=TGGT1_203370 | organism=Toxoplasma_gondii_GT1 | gene_product=hypothetical protein | transcript_product=hypothetical protein | location=TGGT1_chrVIIa:2439891-2442215(-) | protein_length=774 | sequence_SO=chromosome | SO=protein_coding | is_pseudo=false	TGGT1_203370-t26_1-p1	81 kDa	0.997626	9	1	939906	947110	1014042	0.88	0.99	0.89
TRUE	Empty	TGGT1_239400-t26_1-p1 | transcript=TGGT1_239400-t26_1 | gene=TGGT1_239400 | organism=Toxoplasma_gondii_GT1 | gene_product=hypothetical protein | transcript_product=hypothetical protein | location=TGGT1_chrVI:611132-617706(+) | protein_length=1265 | sequence_SO=chromosome | SO=protein_coding | is_pseudo=false	TGGT1_239400-t26_1-p1	134 kDa	0.997623	9	1	1029583	1160954	737899	0.031	0.54	0.15
TRUE	Empty	TGGT1_320080-t26_1-p1 | transcript=TGGT1_320080-t26_1 | gene=TGGT1_320080 | organism=Toxoplasma_gondii_GT1 | gene_product=hypothetical protein | transcript_product=hypothetical protein | location=TGGT1_chrIV:470763-478288(+) | protein_length=1673 | sequence_SO=chromosome | SO=protein_coding | is_pseudo=false	TGGT1_320080-t26_1-p1	171 kDa	0.997603	9	1	638492	580998	695143	0.22	0.23	0.44
TRUE	Empty	TGGT1_252360-t26_1-p1 | transcript=TGGT1_252360-t26_1 | gene=TGGT1_252360 | organism=Toxoplasma_gondii_GT1 | gene_product=rhoptry kinase family protein ROP24 (incomplete catalytic triad) | transcript_product=rhoptry kinase family protein ROP24 (incomplete catalytic triad) | location=TGGT1_chrIII:494762-496369(+) | protein_length=535 | sequence_SO=chromosome | SO=protein_coding | is_pseudo=false	TGGT1_252360-t26_1-p1	61 kDa	0.997577	9	1	17895060	17751060	21034760	0.34	0.85	0.37
TRUE	Empty	TGGT1_208590-t26_1-p1 | transcript=TGGT1_208590-t26_1 | gene=TGGT1_208590 | organism=Toxoplasma_gondii_GT1 | gene_product=putative vacuolar ATP synthase subunit 54kD | transcript_product=putative vacuolar ATP synthase subunit 54kD | location=TGGT1_chrIb:821268-829149(+) | protein_length=475 | sequence_SO=chromosome | SO=protein_coding | is_pseudo=false	TGGT1_208590-t26_1-p1	53 kDa	0.997343	9	1	2127691	2636282	1796822	0.34	0.43	0.7
TRUE	Empty	TGGT1_211260-t26_1-p1 | transcript=TGGT1_211260-t26_1 | gene=TGGT1_211260 | organism=Toxoplasma_gondii_GT1 | gene_product=rhoptry kinase family protein ROP26 (incomplete catalytic triad) | transcript_product=rhoptry kinase family protein ROP26 (incomplete catalytic triad) | location=TGGT1_chrIV:1816280-1817587(-) | protein_length=435 | sequence_SO=chromosome | SO=protein_coding | is_pseudo=false	TGGT1_211260-t26_1-p1	48 kDa	0.997276	9	1	8326996	9746896	6796554	0.035	0.47	0.36
TRUE	Empty	TGGT1_268200-t26_1-p1 | transcript=TGGT1_268200-t26_1 | gene=TGGT1_268200 | organism=Toxoplasma_gondii_GT1 | gene_product=RNA recognition motif-containing protein | transcript_product=RNA recognition motif-containing protein | location=TGGT1_chrVIII:6648500-6651532(+) | protein_length=648 | sequence_SO=chromosome | SO=protein_coding | is_pseudo=false	TGGT1_268200-t26_1-p1	66 kDa	0.99718	9	0.89	2346141	2218970	2113713	0.82	0.83	0.73
TRUE	Empty	TGGT1_229180-t26_1-p1 | transcript=TGGT1_229180-t26_1 | gene=TGGT1_229180 | organism=Toxoplasma_gondii_GT1 | gene_product=HEAT repeat-containing protein | transcript_product=HEAT repeat-containing protein | location=TGGT1_chrVIII:71618-81573(-) | protein_length=1238 | sequence_SO=chromosome | SO=protein_coding | is_pseudo=false	TGGT1_229180-t26_1-p1	136 kDa	0.996991	9	1	1810352	1684008	1960535	0.13	0.72	0.7
TRUE	Empty	TGGT1_202390-t26_1-p1 | transcript=TGGT1_202390-t26_1 | gene=TGGT1_202390 | organism=Toxoplasma_gondii_GT1 | gene_product=S15 sporozoite-expressed protein | transcript_product=S15 sporozoite-expressed protein | location=TGGT1_chrVIIa:3261261-3263894(-) | protein_length=587 | sequence_SO=chromosome | SO=protein_coding | is_pseudo=false	TGGT1_202390-t26_1-p1	62 kDa	0.996822	9	1	4987639	4649069	5651421	0.3	0.79	0.69
TRUE	Empty	TGGT1_214200-t26_1-p1 | transcript=TGGT1_214200-t26_1 | gene=TGGT1_214200 | organism=Toxoplasma_gondii_GT1 | gene_product=WD domain, G-beta repeat-containing protein | transcript_product=WD domain, G-beta repeat-containing protein | location=TGGT1_chrX:5990148-5999891(-) | protein_length=1396 | sequence_SO=chromosome | SO=protein_coding | is_pseudo=false	TGGT1_214200-t26_1-p1	151 kDa	0.996558	9	1	2422150	2500794	3414822	0.67	0.96	0.52
TRUE	Empty	TGGT1_228770-t26_1-p1 | transcript=TGGT1_228770-t26_1 | gene=TGGT1_228770 | organism=Toxoplasma_gondii_GT1 | gene_product=hypothetical protein | transcript_product=hypothetical protein | location=TGGT1_chrX:57101-62681(-) | protein_length=542 | sequence_SO=chromosome | SO=protein_coding | is_pseudo=false	TGGT1_228770-t26_1-p1	59 kDa	0.996451	9	1	1532147	1652682	1224821	0.13	0.32	0.19
TRUE	Empty	TGGT1_213790-t26_1-p1 | transcript=TGGT1_213790-t26_1 | gene=TGGT1_213790 | organism=Toxoplasma_gondii_GT1 | gene_product=hypothetical protein | transcript_product=hypothetical protein | location=TGGT1_chrV:1195757-1209601(+) | protein_length=1774 | sequence_SO=chromosome | SO=protein_coding | is_pseudo=false	TGGT1_213790-t26_1-p1	192 kDa	0.996385	9	1	1122853	1014620	1122798	0.48	0.38	1
TRUE	Empty	TGGT1_312990-t26_1-p1 | transcript=TGGT1_312990-t26_1 | gene=TGGT1_312990 | organism=Toxoplasma_gondii_GT1 | gene_product=DEAD/DEAH box ATP-dependent RNA helicase | transcript_product=DEAD/DEAH box ATP-dependent RNA helicase | location=TGGT1_chrXI:2984273-2989253(-) | protein_length=569 | sequence_SO=chromosome | SO=protein_coding | is_pseudo=false	TGGT1_312990-t26_1-p1	64 kDa	0.99626	9	1	5392327	5428278	6041823	0.59	0.95	0.57
TRUE	Empty	TGGT1_276210-t26_1-p1 | transcript=TGGT1_276210-t26_1 | gene=TGGT1_276210 | organism=Toxoplasma_gondii_GT1 | gene_product=phosphoglycerate mutase family protein | transcript_product=phosphoglycerate mutase family protein | location=TGGT1_chrIII:31225-34235(+) | protein_length=825 | sequence_SO=chromosome | SO=protein_coding | is_pseudo=false	TGGT1_276210-t26_1-p1	92 kDa	0.996167	9	1	2308908	2319786	2609632	0.59	0.99	0.72
TRUE	Empty	TGGT1_223760-t26_1-p1 | transcript=TGGT1_223760-t26_1 | gene=TGGT1_223760 | organism=Toxoplasma_gondii_GT1 | gene_product=hypothetical protein | transcript_product=hypothetical protein | location=TGGT1_chrX:3506110-3512843(-) | protein_length=1588 | sequence_SO=chromosome | SO=protein_coding | is_pseudo=false	TGGT1_223760-t26_1-p1	169 kDa	0.996143	9	1	519045	445417	511679	0.67	0.8	0.98
TRUE	Empty	TGGT1_281440-t26_1-p1 | transcript=TGGT1_281440-t26_1 | gene=TGGT1_281440 | organism=Toxoplasma_gondii_GT1 | gene_product=hypothetical protein | transcript_product=hypothetical protein | location=TGGT1_chrVIIa:4012076-4027711(+) | protein_length=3668 | sequence_SO=chromosome | SO=protein_coding | is_pseudo=false	TGGT1_281440-t26_1-p1	390 kDa	0.996038	9	1	453817	735943	447340	0.15	0.16	0.8
TRUE	Empty	TGGT1_260170-t26_1-p1 | transcript=TGGT1_260170-t26_1 | gene=TGGT1_260170 | organism=Toxoplasma_gondii_GT1 | gene_product=putative elongation factor EF-G | transcript_product=putative elongation factor EF-G | location=TGGT1_chrVIIb:2455204-2462803(-) | protein_length=883 | sequence_SO=chromosome | SO=protein_coding | is_pseudo=false	TGGT1_260170-t26_1-p1	97 kDa	0.995972	9	1	1000393	1315001	888427	0.32	0.39	0.79
TRUE	Empty	TGGT1_411760-t26_1-p1 | transcript=TGGT1_411760-t26_1 | gene=TGGT1_411760 | organism=Toxoplasma_gondii_GT1 | gene_product=actin | transcript_product=actin | location=AAQM03000536:57-991(+) | protein_length=287 | sequence_SO=contig | SO=protein_coding | is_pseudo=false	TGGT1_411760-t26_1-p1	32 kDa	0.995808	8	0.88	98039090	96951840	119268700	0.45	0.97	0.19
TRUE	Empty	TGGT1_256030-t26_1-p1 | transcript=TGGT1_256030-t26_1 | gene=TGGT1_256030 | organism=Toxoplasma_gondii_GT1 | gene_product=hypothetical protein | transcript_product=hypothetical protein | location=TGGT1_chrVIIb:4469365-4470923(-) | protein_length=256 | sequence_SO=chromosome | SO=protein_coding | is_pseudo=false	TGGT1_256030-t26_1-p1	29 kDa	0.995497	9	1	3121181	3828005	2831915	0.092	0.2	0.56
TRUE	Empty	TGGT1_267690-t26_1-p1 | transcript=TGGT1_267690-t26_1 | gene=TGGT1_267690 | organism=Toxoplasma_gondii_GT1 | gene_product=hypothetical protein | transcript_product=hypothetical protein | location=TGGT1_chrIX:281375-289839(+) | protein_length=1863 | sequence_SO=chromosome | SO=protein_coding | is_pseudo=false	TGGT1_267690-t26_1-p1	204 kDa	0.994717	9	1	1087340	1084187	1177761	0.1	0.99	0.66
TRUE	Empty	TGGT1_245460-t26_1-p1 | transcript=TGGT1_245460-t26_1 | gene=TGGT1_245460 | organism=Toxoplasma_gondii_GT1 | gene_product=ribosomal protein RPS8 | transcript_product=ribosomal protein RPS8 | location=TGGT1_chrXII:2220293-2224095(-) | protein_length=205 | sequence_SO=chromosome | SO=protein_coding | is_pseudo=false	TGGT1_245460-t26_1-p1	23 kDa	0.994589	9	1	6169241	7836560	7780755	0.97	0.26	0.026
TRUE	Empty	TGGT1_263050-t26_1-p1 | transcript=TGGT1_263050-t26_1 | gene=TGGT1_263050 | organism=Toxoplasma_gondii_GT1 | gene_product=ribosomal protein RPL13 | transcript_product=ribosomal protein RPL13 | location=TGGT1_chrVIIb:826699-830544(-) | protein_length=355 | sequence_SO=chromosome | SO=protein_coding | is_pseudo=false	TGGT1_263050-t26_1-p1	40 kDa	0.994474	9	1	15250670	16145380	16706230	0.67	0.57	0.47
TRUE	Empty	TGGT1_294620-t26_1-p1 | transcript=TGGT1_294620-t26_1 | gene=TGGT1_294620 | organism=Toxoplasma_gondii_GT1 | gene_product=putative eukaryotic initiation factor-3, subunit 8 | transcript_product=putative eukaryotic initiation factor-3, subunit 8 | location=TGGT1_chrIa:989669-996523(-) | protein_length=971 | sequence_SO=chromosome | SO=protein_coding | is_pseudo=false	TGGT1_294620-t26_1-p1	109 kDa	0.994439	9	1	1045446	985080	762528	0.62	0.86	0.51
TRUE	Empty	TGGT1_269770-t26_1-p1 | transcript=TGGT1_269770-t26_1 | gene=TGGT1_269770 | organism=Toxoplasma_gondii_GT1 | gene_product=WD domain, G-beta repeat-containing protein | transcript_product=WD domain, G-beta repeat-containing protein | location=TGGT1_chrVIII:5602444-5612212(+) | protein_length=1127 | sequence_SO=chromosome | SO=protein_coding | is_pseudo=false	TGGT1_269770-t26_1-p1	121 kDa	0.99401	9	1	714711	841444	1044147	0.45	0.27	0.25
TRUE	Empty	TGGT1_286440-t26_1-p1 | transcript=TGGT1_286440-t26_1 | gene=TGGT1_286440 | organism=Toxoplasma_gondii_GT1 | gene_product=malic enzyme | transcript_product=malic enzyme | location=TGGT1_chrV:1681686-1685375(-) | protein_length=370 | sequence_SO=chromosome | SO=protein_coding | is_pseudo=false	TGGT1_286440-t26_1-p1	42 kDa	0.993325	9	1	1179327	1187281	1168878	0.9	0.96	0.96
TRUE	Empty	TGGT1_290200-t26_1-p1 | transcript=TGGT1_290200-t26_1 | gene=TGGT1_290200 | organism=Toxoplasma_gondii_GT1 | gene_product=NAD/NADP octopine/nopaline dehydrogenase, alpha-helical domain-containing protein | transcript_product=NAD/NADP octopine/nopaline dehydrogenase, alpha-helical domain-containing protein | location=TGGT1_chrIX:3448166-3452814(-) | protein_length=435 | sequence_SO=chromosome | SO…	TGGT1_290200-t26_1-p1	48 kDa	0.993176	8	1	1272286	1423791	1834346	0.48	0.78	0.5
TRUE	Empty	TGGT1_212250-t26_1-p1 | transcript=TGGT1_212250-t26_1 | gene=TGGT1_212250 | organism=Toxoplasma_gondii_GT1 | gene_product=XPG N-terminal domain-containing protein | transcript_product=XPG N-terminal domain-containing protein | location=TGGT1_chrX:3863526-3867619(+) | protein_length=767 | sequence_SO=chromosome | SO=protein_coding | is_pseudo=false	TGGT1_212250-t26_1-p1	87 kDa	0.991373	9	1	1141200	1279512	1108527	0.52	0.74	0.94
TRUE	Empty	TGGT1_253140-t26_1-p1 | transcript=TGGT1_253140-t26_1 | gene=TGGT1_253140 | organism=Toxoplasma_gondii_GT1 | gene_product=hypothetical protein | transcript_product=hypothetical protein | location=TGGT1_chrIII:753985-759307(-) | protein_length=1519 | sequence_SO=chromosome | SO=protein_coding | is_pseudo=false	TGGT1_253140-t26_1-p1	165 kDa	0.99043	9	1	698215	492928	811910	0.22	0.068	0.63
TRUE	Empty	TGGT1_235970-t26_1-p1 | transcript=TGGT1_235970-t26_1 | gene=TGGT1_235970 | organism=Toxoplasma_gondii_GT1 | gene_product=putative eukaryotic initiation factor-2 gamma | transcript_product=putative eukaryotic initiation factor-2 gamma | location=TGGT1_chrX:5097473-5103737(+) | protein_length=465 | sequence_SO=chromosome | SO=protein_coding | is_pseudo=false	TGGT1_235970-t26_1-p1	51 kDa	0.989266	9	1	1615093	1367558	1712265	0.68	0.69	0.89
TRUE	Empty	TGGT1_243440-t26_1-p1 | transcript=TGGT1_243440-t26_1 | gene=TGGT1_243440 | organism=Toxoplasma_gondii_GT1 | gene_product=histone lysine acetyltransferase GCN5-B | transcript_product=histone lysine acetyltransferase GCN5-B | location=TGGT1_chrVI:2548787-2555747(-) | protein_length=1032 | sequence_SO=chromosome | SO=protein_coding | is_pseudo=false	TGGT1_243440-t26_1-p1	111 kDa	0.98863	9	1	1974989	1637578	2078890	0.29	0.52	0.86
TRUE	Empty	TGGT1_253430-t26_1-p1 | transcript=TGGT1_253430-t26_1 | gene=TGGT1_253430 | organism=Toxoplasma_gondii_GT1 | gene_product=putative asparagine synthetase | transcript_product=putative asparagine synthetase | location=TGGT1_chrIII:924367-930594(+) | protein_length=588 | sequence_SO=chromosome | SO=protein_coding | is_pseudo=false	TGGT1_253430-t26_1-p1	66 kDa	0.986922	9	1	1196989	1271012	1053694	0.47	0.76	0.59
TRUE	Empty	TGGT1_207370-t26_1-p1 | transcript=TGGT1_207370-t26_1 | gene=TGGT1_207370 | organism=Toxoplasma_gondii_GT1 | gene_product=hypothetical protein | transcript_product=hypothetical protein | location=TGGT1_chrIb:26497-30898(-) | protein_length=1373 | sequence_SO=chromosome | SO=protein_coding | is_pseudo=false	TGGT1_207370-t26_1-p1	143 kDa	0.986652	9	1	1119735	1178129	1498449	0.41	0.77	0.37
TRUE	Empty	TGGT1_229030-t26_1-p1 | transcript=TGGT1_229030-t26_1 | gene=TGGT1_229030 | organism=Toxoplasma_gondii_GT1 | gene_product=hypothetical protein | transcript_product=hypothetical protein | location=TGGT1_chrVIII:38781-41770(+) | protein_length=228 | sequence_SO=chromosome | SO=protein_coding | is_pseudo=false	TGGT1_229030-t26_1-p1	25 kDa	1	8	1	8790249	8228404	9490231	0.21	0.65	0.62
TRUE	Empty	TGGT1_297070-t26_1-p1 | transcript=TGGT1_297070-t26_1 | gene=TGGT1_297070 | organism=Toxoplasma_gondii_GT1 | gene_product=hypothetical protein | transcript_product=hypothetical protein | location=TGGT1_chrII:1492810-1494671(-) | protein_length=519 | sequence_SO=chromosome | SO=protein_coding | is_pseudo=false	TGGT1_297070-t26_1-p1	58 kDa	0.999999	8	1	26647080	29888490	22219830	0.1	0.42	0.33
TRUE	Empty	TGGT1_231910-t26_1-p1 | transcript=TGGT1_231910-t26_1 | gene=TGGT1_231910 | organism=Toxoplasma_gondii_GT1 | gene_product=ATP synthase F1 gamma subunit | transcript_product=ATP synthase F1 gamma subunit | location=TGGT1_chrVIII:1625860-1630528(+) | protein_length=314 | sequence_SO=chromosome | SO=protein_coding | is_pseudo=false	TGGT1_231910-t26_1-p1	35 kDa	0.999997	7	1	4930621	5634315	4321765	0.37	0.17	0.61
TRUE	Empty	TGGT1_290700-t26_1-p1 | transcript=TGGT1_290700-t26_1 | gene=TGGT1_290700 | organism=Toxoplasma_gondii_GT1 | gene_product=hypothetical protein | transcript_product=hypothetical protein | location=TGGT1_chrIX:3657972-3658910(+) | protein_length=312 | sequence_SO=chromosome | SO=protein_coding | is_pseudo=false	TGGT1_290700-t26_1-p1	34 kDa	0.999996	8	1	5635986	5742789	5385209	0.53	0.8	0.69
TRUE	Empty	TGGT1_247440-t26_1-p1 | transcript=TGGT1_247440-t26_1 | gene=TGGT1_247440 | organism=Toxoplasma_gondii_GT1 | gene_product=hypothetical protein | transcript_product=hypothetical protein | location=TGGT1_chrXII:3270269-3271405(-) | protein_length=378 | sequence_SO=chromosome | SO=protein_coding | is_pseudo=false	TGGT1_247440-t26_1-p1	40 kDa	0.999994	8	1	5180079	5333375	5884914	0.15	0.29	0.11
TRUE	Empty	TGGT1_214790-t26_1-p1 | transcript=TGGT1_214790-t26_1 | gene=TGGT1_214790 | organism=Toxoplasma_gondii_GT1 | gene_product=glycoprotein | transcript_product=glycoprotein | location=TGGT1_chrX:6386376-6388397(+) | protein_length=283 | sequence_SO=chromosome | SO=protein_coding | is_pseudo=false	TGGT1_214790-t26_1-p1	31 kDa	0.999987	6	1	13502910	16018220	11343950	0.18	0.21	0.39
TRUE	Empty	TGGT1_318160-t26_1-p1 | transcript=TGGT1_318160-t26_1 | gene=TGGT1_318160 | organism=Toxoplasma_gondii_GT1 | gene_product=MSP (Major sperm protein) domain-containing protein | transcript_product=MSP (Major sperm protein) domain-containing protein | location=TGGT1_chrIV:1459846-1460565(+) | protein_length=239 | sequence_SO=chromosome | SO=protein_coding | is_pseudo=false	TGGT1_318160-t26_1-p1	26 kDa	0.999985	8	1	18421640	16254250	17279080	0.63	0.59	0.8
TRUE	Empty	TGGT1_259010-t26_1-p1 | transcript=TGGT1_259010-t26_1 | gene=TGGT1_259010 | organism=Toxoplasma_gondii_GT1 | gene_product=putative vacuolar ATP synthase subunit d | transcript_product=putative vacuolar ATP synthase subunit d | location=TGGT1_chrVIIb:2988734-2994961(-) | protein_length=396 | sequence_SO=chromosome | SO=protein_coding | is_pseudo=false	TGGT1_259010-t26_1-p1	45 kDa	0.999983	7	1	3189588	3436902	3719137	0.77	0.49	0.59
TRUE	Empty	TGGT1_299060-t26_1-p1 | transcript=TGGT1_299060-t26_1 | gene=TGGT1_299060 | organism=Toxoplasma_gondii_GT1 | gene_product=sodium/hydrogen exchanger NHE2 | transcript_product=sodium/hydrogen exchanger NHE2 | location=TGGT1_chrIII:2197238-2203867(+) | protein_length=823 | sequence_SO=chromosome | SO=protein_coding | is_pseudo=false	TGGT1_299060-t26_1-p1	91 kDa	0.999974	8	1	2236033	2481577	1908410	0.36	0.58	0.54
TRUE	Empty	TGGT1_267590-t26_1-p1 | transcript=TGGT1_267590-t26_1 | gene=TGGT1_267590 | organism=Toxoplasma_gondii_GT1 | gene_product=hypothetical protein | transcript_product=hypothetical protein | location=TGGT1_chrIX:368691-379457(+) | protein_length=930 | sequence_SO=chromosome | SO=protein_coding | is_pseudo=false	TGGT1_267590-t26_1-p1	102 kDa	0.999958	8	1	3317669	3466850	3571991	0.44	0.27	0.031
TRUE	Empty	TGGT1_297810-t26_1-p1 | transcript=TGGT1_297810-t26_1 | gene=TGGT1_297810 | organism=Toxoplasma_gondii_GT1 | gene_product=hypothetical protein | transcript_product=hypothetical protein | location=TGGT1_chrII:2012516-2015258(-) | protein_length=266 | sequence_SO=chromosome | SO=protein_coding | is_pseudo=false	TGGT1_297810-t26_1-p1	30 kDa	0.999953	8	1	2379090	3227681	2314495	0.54	0.23	0.96
TRUE	Empty	TGGT1_232780-t26_1-p1 | transcript=TGGT1_232780-t26_1 | gene=TGGT1_232780 | organism=Toxoplasma_gondii_GT1 | gene_product=hypothetical protein | transcript_product=hypothetical protein | location=TGGT1_chrVIII:2255308-2260311(-) | protein_length=713 | sequence_SO=chromosome | SO=protein_coding | is_pseudo=false	TGGT1_232780-t26_1-p1	78 kDa	0.999913	8	1	2062668	1741337	2549825	0.64	0.48	0.8
TRUE	Empty	TGGT1_309590-t26_1-p1 | transcript=TGGT1_309590-t26_1 | gene=TGGT1_309590 | organism=Toxoplasma_gondii_GT1 | gene_product=rhoptry protein ROP1 | transcript_product=rhoptry protein ROP1 | location=TGGT1_chrXI:707942-709312(+) | protein_length=456 | sequence_SO=chromosome | SO=protein_coding | is_pseudo=false	TGGT1_309590-t26_1-p1	50 kDa	0.999913	8	1	149649600	181456200	144181300	0.54	0.33	0.91
TRUE	Empty	TGGT1_295360-t26_1-p1 | transcript=TGGT1_295360-t26_1 | gene=TGGT1_295360 | organism=Toxoplasma_gondii_GT1 | gene_product=hypothetical protein | transcript_product=hypothetical protein | location=TGGT1_chrIa:1791407-1792949(+) | protein_length=268 | sequence_SO=chromosome | SO=protein_coding | is_pseudo=false	TGGT1_295360-t26_1-p1	30 kDa	0.999908	8	1	9378989	10861640	7903397	0.1	0.17	0.29
TRUE	Empty	TGGT1_246940-t26_1-p1 | transcript=TGGT1_246940-t26_1 | gene=TGGT1_246940 | organism=Toxoplasma_gondii_GT1 | gene_product=hypothetical protein | transcript_product=hypothetical protein | location=TGGT1_chrXII:2958189-2959370(+) | protein_length=393 | sequence_SO=chromosome | SO=protein_coding | is_pseudo=false	TGGT1_246940-t26_1-p1	45 kDa	0.999901	8	1	1427849	1310203	997040	0.35	0.66	0.19
TRUE	Empty	TGGT1_212130-t26_1-p1 | transcript=TGGT1_212130-t26_1 | gene=TGGT1_212130 | organism=Toxoplasma_gondii_GT1 | gene_product=phospholipase, patatin family protein | transcript_product=phospholipase, patatin family protein | location=TGGT1_chrX:3947536-3959836(+) | protein_length=994 | sequence_SO=chromosome | SO=protein_coding | is_pseudo=false	TGGT1_212130-t26_1-p1	110 kDa	0.999867	8	1	490432	504995	487087	0.85	0.89	0.94
TRUE	Empty	TGGT1_231350-t26_1-p1 | transcript=TGGT1_231350-t26_1 | gene=TGGT1_231350 | organism=Toxoplasma_gondii_GT1 | gene_product=glucosamine-fructose-6-phosphate aminotransferase | transcript_product=glucosamine-fructose-6-phosphate aminotransferase | location=TGGT1_chrVIII:1349907-1353023(-) | protein_length=898 | sequence_SO=chromosome | SO=protein_coding | is_pseudo=false	TGGT1_231350-t26_1-p1	97 kDa	0.999866	8	1	1422285	1688144	1337693	0.044	0.3	0.66
TRUE	Empty	TGGT1_309265-t26_1-p1 | transcript=TGGT1_309265-t26_1 | gene=TGGT1_309265 | organism=Toxoplasma_gondii_GT1 | gene_product=oxidoreductase, short chain dehydrogenase/reductase family protein | transcript_product=oxidoreductase, short chain dehydrogenase/reductase family protein | location=TGGT1_chrXI:562095-565518(+) | protein_length=928 | sequence_SO=chromosome | SO=protein_coding | is_pseudo=false	TGGT1_309265-t26_1-p1	99 kDa	0.999846	8	1	8773617	7975890	9132073	0.095	0.7	0.87
TRUE	Empty	TGGT1_214210-t26_1-p1 | transcript=TGGT1_214210-t26_1 | gene=TGGT1_214210 | organism=Toxoplasma_gondii_GT1 | gene_product=rRNA pseudouridine synthase | transcript_product=rRNA pseudouridine synthase | location=TGGT1_chrX:6002905-6008379(-) | protein_length=505 | sequence_SO=chromosome | SO=protein_coding | is_pseudo=false	TGGT1_214210-t26_1-p1	57 kDa	0.999842	8	1	5818506	6024349	5124730	0.21	0.92	0.72
TRUE	Empty	TGGT1_288750-t26_1-p1 | transcript=TGGT1_288750-t26_1 | gene=TGGT1_288750 | organism=Toxoplasma_gondii_GT1 | gene_product=ubiquinol-cytochrome c reductase | transcript_product=ubiquinol-cytochrome c reductase | location=TGGT1_chrIX:2534185-2536581(+) | protein_length=234 | sequence_SO=chromosome | SO=protein_coding | is_pseudo=false	TGGT1_288750-t26_1-p1	27 kDa	0.999835	7	1	7716149	9410130	7203222	0.44	0.34	0.79
TRUE	Empty	TGGT1_220240-t26_1-p1 | transcript=TGGT1_220240-t26_1 | gene=TGGT1_220240 | organism=Toxoplasma_gondii_GT1 | gene_product=hypothetical protein | transcript_product=hypothetical protein | location=TGGT1_chrV:140178-141758(-) | protein_length=526 | sequence_SO=chromosome | SO=protein_coding | is_pseudo=false	TGGT1_220240-t26_1-p1	54 kDa	0.999835	8	1	7070251	6202500	6543157	0.72	0.17	0.64
TRUE	Empty	TGGT1_319340-t26_1-p1 | transcript=TGGT1_319340-t26_1 | gene=TGGT1_319340 | organism=Toxoplasma_gondii_GT1 | gene_product=hypothetical protein | transcript_product=hypothetical protein | location=TGGT1_chrIV:962742-964670(+) | protein_length=481 | sequence_SO=chromosome | SO=protein_coding | is_pseudo=false	TGGT1_319340-t26_1-p1	52 kDa	0.999812	8	1	6844766	7682715	5877372	0.052	0.29	0.1
TRUE	Empty	TGGT1_227560-t26_1-p1 | transcript=TGGT1_227560-t26_1 | gene=TGGT1_227560 | organism=Toxoplasma_gondii_GT1 | gene_product=putative IWS1 transcription factor | transcript_product=putative IWS1 transcription factor | location=TGGT1_chrX:825559-830619(+) | protein_length=476 | sequence_SO=chromosome | SO=protein_coding | is_pseudo=false	TGGT1_227560-t26_1-p1	54 kDa	0.999799	8	1	24156010	17224360	25550260	0.086	0.18	0.79
TRUE	Empty	TGGT1_255350-t26_1-p1 | transcript=TGGT1_255350-t26_1 | gene=TGGT1_255350 | organism=Toxoplasma_gondii_GT1 | gene_product=putative ATPase | transcript_product=putative ATPase | location=TGGT1_chrVIIb:4787376-4795237(-) | protein_length=731 | sequence_SO=chromosome | SO=protein_coding | is_pseudo=false	TGGT1_255350-t26_1-p1	81 kDa	0.999777	8	1	4241287	3001533	4306456	0.55	0.16	0.98
TRUE	Empty	TGGT1_262980-t26_1-p1 | transcript=TGGT1_262980-t26_1 | gene=TGGT1_262980 | organism=Toxoplasma_gondii_GT1 | gene_product=hypothetical protein | transcript_product=hypothetical protein | location=TGGT1_chrVIIb:859839-862624(+) | protein_length=277 | sequence_SO=chromosome | SO=protein_coding | is_pseudo=false	TGGT1_262980-t26_1-p1	31 kDa	0.99976	8	1	1574501	1727960	1539659	0.55	0.51	0.91
TRUE	Empty	TGGT1_272660-t26_1-p1 | transcript=TGGT1_272660-t26_1 | gene=TGGT1_272660 | organism=Toxoplasma_gondii_GT1 | gene_product=hypothetical protein | transcript_product=hypothetical protein | location=TGGT1_chrVIII:3808733-3810272(+) | protein_length=258 | sequence_SO=chromosome | SO=protein_coding | is_pseudo=false	TGGT1_272660-t26_1-p1	28 kDa	0.999757	8	1	16447280	18570170	19481240	0.48	0.64	0.54
TRUE	Empty	TGGT1_270865-t26_1-p1 | transcript=TGGT1_270865-t26_1 | gene=TGGT1_270865 | organism=Toxoplasma_gondii_GT1 | gene_product=putative adenylate cyclase | transcript_product=putative adenylate cyclase | location=TGGT1_chrVIII:4921378-4938757(-) | protein_length=2040 | sequence_SO=chromosome | SO=protein_coding | is_pseudo=false	TGGT1_270865-t26_1-p1	223 kDa	0.999723	8	1	537664	900858	356919	0.011	0.51	0.59
TRUE	Empty	TGGT1_227800-t26_1-p1 | transcript=TGGT1_227800-t26_1 | gene=TGGT1_227800 | organism=Toxoplasma_gondii_GT1 | gene_product=EF hand domain-containing protein | transcript_product=EF hand domain-containing protein | location=TGGT1_chrX:720180-729168(-) | protein_length=1280 | sequence_SO=chromosome | SO=protein_coding | is_pseudo=false	TGGT1_227800-t26_1-p1	136 kDa	0.999715	8	1	1409166	1417250	1057540	0.064	0.94	0.022
TRUE	Empty	TGGT1_310860-t26_1-p1 | transcript=TGGT1_310860-t26_1 | gene=TGGT1_310860 | organism=Toxoplasma_gondii_GT1 | gene_product=U5 snRNP-specific protein | transcript_product=U5 snRNP-specific protein | location=TGGT1_chrXI:1594627-1600244(-) | protein_length=367 | sequence_SO=chromosome | SO=protein_coding | is_pseudo=false	TGGT1_310860-t26_1-p1	39 kDa	0.999671	8	1	2255262	2388720	1758301	0.36	0.9	0.65
TRUE	Empty	TGGT1_286630-t26_1-p1 | transcript=TGGT1_286630-t26_1 | gene=TGGT1_286630 | organism=Toxoplasma_gondii_GT1 | gene_product=redoxin domain-containing protein | transcript_product=redoxin domain-containing protein | location=TGGT1_chrV:1606591-1607469(+) | protein_length=292 | sequence_SO=chromosome | SO=protein_coding | is_pseudo=false	TGGT1_286630-t26_1-p1	31 kDa	0.99967	8	1	4677465	5094257	4890271	0.79	0.78	0.88
TRUE	Empty	TGGT1_312260-t26_1-p1 | transcript=TGGT1_312260-t26_1 | gene=TGGT1_312260 | organism=Toxoplasma_gondii_GT1 | gene_product=hypothetical protein | transcript_product=hypothetical protein | location=TGGT1_chrXI:2512317-2516826(-) | protein_length=904 | sequence_SO=chromosome | SO=protein_coding | is_pseudo=false	TGGT1_312260-t26_1-p1	97 kDa	0.999653	8	1	4240128	3545480	4191576	0.048	0.7	0.98
TRUE	Empty	TGGT1_201710-t26_1-p1 | transcript=TGGT1_201710-t26_1 | gene=TGGT1_201710 | organism=Toxoplasma_gondii_GT1 | gene_product=WD domain, G-beta repeat-containing protein | transcript_product=WD domain, G-beta repeat-containing protein | location=TGGT1_chrVIIa:3734491-3738475(+) | protein_length=559 | sequence_SO=chromosome | SO=protein_coding | is_pseudo=false	TGGT1_201710-t26_1-p1	60 kDa	0.999645	8	1	4913339	5585103	6193864	0.56	0.28	0.27
TRUE	Empty	TGGT1_261450-t26_1-p1 | transcript=TGGT1_261450-t26_1 | gene=TGGT1_261450 | organism=Toxoplasma_gondii_GT1 | gene_product=hypothetical protein | transcript_product=hypothetical protein | location=TGGT1_chrVIIb:1712431-1719358(-) | protein_length=1112 | sequence_SO=chromosome | SO=protein_coding | is_pseudo=false	TGGT1_261450-t26_1-p1	119 kDa	0.999617	8	1	3504517	3244241	3552478	0.63	0.17	0.94
TRUE	Empty	TGGT1_267810-t26_1-p1 | transcript=TGGT1_267810-t26_1 | gene=TGGT1_267810 | organism=Toxoplasma_gondii_GT1 | gene_product=Rab 5 | transcript_product=Rab 5 | location=TGGT1_chrIX:174026-177378(+) | protein_length=241 | sequence_SO=chromosome | SO=protein_coding | is_pseudo=false	TGGT1_267810-t26_1-p1	27 kDa	0.999602	8	0.75	5531448	5589901	5477449	0.63	0.94	0.95
TRUE	Empty	TGGT1_223410-t26_1-p1 | transcript=TGGT1_223410-t26_1 | gene=TGGT1_223410 | organism=Toxoplasma_gondii_GT1 | gene_product=putative eukaryotic initiation factor-4E | transcript_product=putative eukaryotic initiation factor-4E | location=TGGT1_chrX:3763701-3766447(+) | protein_length=225 | sequence_SO=chromosome | SO=protein_coding | is_pseudo=false	TGGT1_223410-t26_1-p1	26 kDa	0.999574	8	1	4838455	4745609	5010110	0.3	0.72	0.42
TRUE	Empty	TGGT1_216580-t26_1-p1 | transcript=TGGT1_216580-t26_1 | gene=TGGT1_216580 | organism=Toxoplasma_gondii_GT1 | gene_product=hypothetical protein | transcript_product=hypothetical protein | location=TGGT1_chrXI:5993384-5998282(-) | protein_length=1327 | sequence_SO=chromosome | SO=protein_coding | is_pseudo=false	TGGT1_216580-t26_1-p1	130 kDa	0.999539	8	1	742953	738392	763992	0.91	0.99	0.97
TRUE	Empty	TGGT1_299780-t26_1-p1 | transcript=TGGT1_299780-t26_1 | gene=TGGT1_299780 | organism=Toxoplasma_gondii_GT1 | gene_product=hypothetical protein | transcript_product=hypothetical protein | location=TGGT1_chrXII:309236-312184(-) | protein_length=545 | sequence_SO=chromosome | SO=protein_coding | is_pseudo=false	TGGT1_299780-t26_1-p1	59 kDa	0.999536	8	1	3540065	3600242	3279093	0.6	0.86	0.62
TRUE	Empty	TGGT1_310430A-t26_1-p1 | transcript=TGGT1_310430A-t26_1 | gene=TGGT1_310430A | organism=Toxoplasma_gondii_GT1 | gene_product=Hsp90 domain-containing protein | transcript_product=Hsp90 domain-containing protein | location=TGGT1_chrXI:1295870-1298343(+) | protein_length=686 | sequence_SO=chromosome | SO=protein_coding | is_pseudo=false	TGGT1_310430A-t26_1-p1	74 kDa	0.999482	8	1	1726571	1742929	1933954	0.56	0.97	0.71
TRUE	Empty	TGGT1_210370-t26_1-p1 | transcript=TGGT1_210370-t26_1 | gene=TGGT1_210370 | organism=Toxoplasma_gondii_GT1 | gene_product=hypothetical protein | transcript_product=hypothetical protein | location=TGGT1_chrIX:4634440-4635879(-) | protein_length=479 | sequence_SO=chromosome | SO=protein_coding | is_pseudo=false	TGGT1_210370-t26_1-p1	52 kDa	0.999457	8	1	3222005	2987858	2958800	0.98	0.52	0.82
TRUE	Empty	TGGT1_240860-t26_1-p1 | transcript=TGGT1_240860-t26_1 | gene=TGGT1_240860 | organism=Toxoplasma_gondii_GT1 | gene_product=acyltransferase domain-containing protein | transcript_product=acyltransferase domain-containing protein | location=TGGT1_chrVI:1452612-1456058(-) | protein_length=281 | sequence_SO=chromosome | SO=protein_coding | is_pseudo=false	TGGT1_240860-t26_1-p1	32 kDa	0.999424	8	1	7569720	6946421	6625497	0.56	0.58	0.44
TRUE	Empty	TGGT1_215230-t26_1-p1 | transcript=TGGT1_215230-t26_1 | gene=TGGT1_215230 | organism=Toxoplasma_gondii_GT1 | gene_product=RNA recognition motif-containing protein | transcript_product=RNA recognition motif-containing protein | location=TGGT1_chrX:6720798-6728105(-) | protein_length=728 | sequence_SO=chromosome | SO=protein_coding | is_pseudo=false	TGGT1_215230-t26_1-p1	81 kDa	0.999418	8	1	1101443	988618	1227707	0.015	0.46	0.47
TRUE	Empty	TGGT1_270380-t26_1-p1 | transcript=TGGT1_270380-t26_1 | gene=TGGT1_270380 | organism=Toxoplasma_gondii_GT1 | gene_product=ribosomal protein RPS13 | transcript_product=ribosomal protein RPS13 | location=TGGT1_chrVIII:5238468-5240728(-) | protein_length=151 | sequence_SO=chromosome | SO=protein_coding | is_pseudo=false	TGGT1_270380-t26_1-p1	17 kDa	0.999368	8	1	21553630	23078360	32485620	0.41	0.81	0.43
TRUE	Empty	TGGT1_232000-t26_1-p1 | transcript=TGGT1_232000-t26_1 | gene=TGGT1_232000 | organism=Toxoplasma_gondii_GT1 | gene_product=hypothetical protein | transcript_product=hypothetical protein | location=TGGT1_chrVIII:1738722-1741055(+) | protein_length=637 | sequence_SO=chromosome | SO=protein_coding | is_pseudo=false	TGGT1_232000-t26_1-p1	69 kDa	0.999363	8	1	403333	400194	206157	0.053	0.96	0.017
TRUE	Empty	TGGT1_255420-t26_1-p1 | transcript=TGGT1_255420-t26_1 | gene=TGGT1_255420 | organism=Toxoplasma_gondii_GT1 | gene_product=hypothetical protein | transcript_product=hypothetical protein | location=TGGT1_chrVIIb:4744619-4746351(-) | protein_length=278 | sequence_SO=chromosome | SO=protein_coding | is_pseudo=false	TGGT1_255420-t26_1-p1	30 kDa	0.99935	7	1	4339600	4022800	3395970	0.25	0.5	0.07
TRUE	Empty	TGGT1_212980-t26_1-p1 | transcript=TGGT1_212980-t26_1 | gene=TGGT1_212980 | organism=Toxoplasma_gondii_GT1 | gene_product=hypothetical protein | transcript_product=hypothetical protein | location=TGGT1_chrV:617528-620094(-) | protein_length=715 | sequence_SO=chromosome | SO=protein_coding | is_pseudo=false	TGGT1_212980-t26_1-p1	76 kDa	0.999271	8	1	1674647	2050218	1885183	0.63	0.008	0.51
TRUE	Empty	TGGT1_220930-t26_1-p1 | transcript=TGGT1_220930-t26_1 | gene=TGGT1_220930 | organism=Toxoplasma_gondii_GT1 | gene_product=hypothetical protein | transcript_product=hypothetical protein | location=TGGT1_chrII:53649-58945(-) | protein_length=687 | sequence_SO=chromosome | SO=protein_coding | is_pseudo=false	TGGT1_220930-t26_1-p1	74 kDa	0.999266	8	1	5185941	5388800	4913835	0.38	0.58	0.59
TRUE	Empty	TGGT1_304740-t26_1-p1 | transcript=TGGT1_304740-t26_1 | gene=TGGT1_304740 | organism=Toxoplasma_gondii_GT1 | gene_product=rhoptry kinase family protein ROP35 | transcript_product=rhoptry kinase family protein ROP35 | location=TGGT1_chrVIIa:653060-656106(-) | protein_length=640 | sequence_SO=chromosome | SO=protein_coding | is_pseudo=false	TGGT1_304740-t26_1-p1	71 kDa	0.999242	8	1	18012310	17077310	18070990	0.83	0.78	0.99
TRUE	Empty	TGGT1_238510-t26_1-p1 | transcript=TGGT1_238510-t26_1 | gene=TGGT1_238510 | organism=Toxoplasma_gondii_GT1 | gene_product=hypothetical protein | transcript_product=hypothetical protein | location=TGGT1_chrVI:255604-259176(+) | protein_length=1082 | sequence_SO=chromosome | SO=protein_coding | is_pseudo=false	TGGT1_238510-t26_1-p1	116 kDa	0.999242	8	1	1181126	1285970	1463288	0.37	0.82	0.6
TRUE	Empty	TGGT1_219310-t26_1-p1 | transcript=TGGT1_219310-t26_1 | gene=TGGT1_219310 | organism=Toxoplasma_gondii_GT1 | gene_product=DnaK family protein | transcript_product=DnaK family protein | location=TGGT1_chrXII:915528-922343(+) | protein_length=818 | sequence_SO=chromosome | SO=protein_coding | is_pseudo=false	TGGT1_219310-t26_1-p1	90 kDa	0.999178	8	1	1365261	1178858	875917	0.27	0.64	0.17
TRUE	Empty	TGGT1_310000-t26_1-p1 | transcript=TGGT1_310000-t26_1 | gene=TGGT1_310000 | organism=Toxoplasma_gondii_GT1 | gene_product=putative membrane protein | transcript_product=putative membrane protein | location=TGGT1_chrXI:960190-965833(+) | protein_length=719 | sequence_SO=chromosome | SO=protein_coding | is_pseudo=false	TGGT1_310000-t26_1-p1	79 kDa	0.999153	8	1	2586234	2611810	2742181	0.14	0.88	0.43
TRUE	Empty	TGGT1_316660-t26_1-p1 | transcript=TGGT1_316660-t26_1 | gene=TGGT1_316660 | organism=Toxoplasma_gondii_GT1 | gene_product=cullin family protein | transcript_product=cullin family protein | location=TGGT1_chrXI:5414764-5426408(+) | protein_length=808 | sequence_SO=chromosome | SO=protein_coding | is_pseudo=false	TGGT1_316660-t26_1-p1	92 kDa	0.999145	8	1	945566	774118	1202581	0.023	0.12	0.021
TRUE	Empty	TGGT1_210790-t26_1-p1 | transcript=TGGT1_210790-t26_1 | gene=TGGT1_210790 | organism=Toxoplasma_gondii_GT1 | gene_product=putative dihydroorotate dehydrogenase reveal | transcript_product=putative dihydroorotate dehydrogenase reveal | location=TGGT1_chrIV:1980005-1990187(-) | protein_length=592 | sequence_SO=chromosome | SO=protein_coding | is_pseudo=false	TGGT1_210790-t26_1-p1	65 kDa	0.999142	8	1	3182396	3354333	2266269	0.22	0.68	0.28
TRUE	Empty	TGGT1_237470-t26_1-p1 | transcript=TGGT1_237470-t26_1 | gene=TGGT1_237470 | organism=Toxoplasma_gondii_GT1 | gene_product=glycine cleavage T-protein (aminomethyl transferase) domain-containing protein | transcript_product=glycine cleavage T-protein (aminomethyl transferase) domain-containing protein | location=TGGT1_chrX:5784913-5792329(+) | protein_length=867 | sequence_SO=chromosome | SO=protei…	TGGT1_237470-t26_1-p1	93 kDa	0.999048	8	1	1209390	1233365	1574503	0.15	0.91	0.31
TRUE	Empty	TGGT1_222170-t26_1-p1 | transcript=TGGT1_222170-t26_1 | gene=TGGT1_222170 | organism=Toxoplasma_gondii_GT1 | gene_product=dense-granule antigen DG32 | transcript_product=dense-granule antigen DG32 | location=TGGT1_chrII:911318-912642(+) | protein_length=300 | sequence_SO=chromosome | SO=protein_coding | is_pseudo=false	TGGT1_222170-t26_1-p1	34 kDa	0.999033	8	1	6884275	5945737	8065769	0.0057	0.1	0.073
TRUE	Empty	TGGT1_269200-t26_1-p1 | transcript=TGGT1_269200-t26_1 | gene=TGGT1_269200 | organism=Toxoplasma_gondii_GT1 | gene_product=putative crooked neck family 1 protein isoform 2 | transcript_product=putative crooked neck family 1 protein isoform 2 | location=TGGT1_chrVIII:5988095-5997726(-) | protein_length=686 | sequence_SO=chromosome | SO=protein_coding | is_pseudo=false	TGGT1_269200-t26_1-p1	82 kDa	0.99902	8	1	1339951	1561834	1255047	0.26	0.31	0.75
TRUE	Empty	TGGT1_291330-t26_1-p1 | transcript=TGGT1_291330-t26_1 | gene=TGGT1_291330 | organism=Toxoplasma_gondii_GT1 | gene_product=RNA recognition motif-containing protein | transcript_product=RNA recognition motif-containing protein | location=TGGT1_chrIX:4055101-4057671(+) | protein_length=228 | sequence_SO=chromosome | SO=protein_coding | is_pseudo=false	TGGT1_291330-t26_1-p1	26 kDa	0.999008	8	1	6201513	7441528	6559759	0.65	0.32	0.84
TRUE	Empty	TGGT1_231130-t26_1-p1 | transcript=TGGT1_231130-t26_1 | gene=TGGT1_231130 | organism=Toxoplasma_gondii_GT1 | gene_product=hypothetical protein | transcript_product=hypothetical protein | location=TGGT1_chrVIII:1250007-1256661(+) | protein_length=711 | sequence_SO=chromosome | SO=protein_coding | is_pseudo=false	TGGT1_231130-t26_1-p1	77 kDa	0.998978	8	1	7825786	7655560	7564386	0.87	0.87	0.78
TRUE	Empty	TGGT1_205240-t26_1-p1 | transcript=TGGT1_205240-t26_1 | gene=TGGT1_205240 | organism=Toxoplasma_gondii_GT1 | gene_product=cleft lip and palate transmembrane protein 1 (clptm1) protein | transcript_product=cleft lip and palate transmembrane protein 1 (clptm1) protein | location=TGGT1_chrVIIa:1429206-1438379(-) | protein_length=794 | sequence_SO=chromosome | SO=protein_coding | is_pseudo=false	TGGT1_205240-t26_1-p1	88 kDa	0.998857	8	1	10018310	8505408	8983497	0.68	0.29	0.57
TRUE	Empty	TGGT1_276140-t26_1-p1 | transcript=TGGT1_276140-t26_1 | gene=TGGT1_276140 | organism=Toxoplasma_gondii_GT1 | gene_product=ADP ribosylation factor ARF1 | transcript_product=ADP ribosylation factor ARF1 | location=TGGT1_chrIII:108590-111506(-) | protein_length=551 | sequence_SO=chromosome | SO=protein_coding | is_pseudo=false	TGGT1_276140-t26_1-p1	62 kDa	0.998781	8	1	27874530	26035420	21188790	0.27	0.79	0.33
TRUE	Empty	TGGT1_235170-t26_1-p1 | transcript=TGGT1_235170-t26_1 | gene=TGGT1_235170 | organism=Toxoplasma_gondii_GT1 | gene_product=ATPase, AAA family protein | transcript_product=ATPase, AAA family protein | location=TGGT1_chrX:4569043-4580176(+) | protein_length=1260 | sequence_SO=chromosome | SO=protein_coding | is_pseudo=false	TGGT1_235170-t26_1-p1	138 kDa	0.998627	8	1	1235733	885243	1380481	0.16	0.31	0.74
TRUE	Empty	TGGT1_235490-t26_1-p1 | transcript=TGGT1_235490-t26_1 | gene=TGGT1_235490 | organism=Toxoplasma_gondii_GT1 | gene_product=hypothetical protein | transcript_product=hypothetical protein | location=TGGT1_chrX:4794558-4804621(+) | protein_length=923 | sequence_SO=chromosome | SO=protein_coding | is_pseudo=false	TGGT1_235490-t26_1-p1	102 kDa	0.998616	8	1	381399	320119	280151	0.58	0.6	0.31
TRUE	Empty	TGGT1_201800-t26_1-p1 | transcript=TGGT1_201800-t26_1 | gene=TGGT1_201800 | organism=Toxoplasma_gondii_GT1 | gene_product=hypothetical protein | transcript_product=hypothetical protein | location=TGGT1_chrVIIa:3679021-3681115(+) | protein_length=267 | sequence_SO=chromosome | SO=protein_coding | is_pseudo=false	TGGT1_201800-t26_1-p1	29 kDa	0.99861	8	1	7907051	9168301	6824640	0.28	0.26	0.53
TRUE	Empty	TGGT1_240510-t26_1-p1 | transcript=TGGT1_240510-t26_1 | gene=TGGT1_240510 | organism=Toxoplasma_gondii_GT1 | gene_product=hypothetical protein | transcript_product=hypothetical protein | location=TGGT1_chrVI:1270405-1274121(-) | protein_length=1238 | sequence_SO=chromosome | SO=protein_coding | is_pseudo=false	TGGT1_240510-t26_1-p1	135 kDa	0.998588	8	1	18088380	2123471	15843250	0.023	0.0051	0.71
TRUE	Empty	TGGT1_310700-t26_1-p1 | transcript=TGGT1_310700-t26_1 | gene=TGGT1_310700 | organism=Toxoplasma_gondii_GT1 | gene_product=serine/threonine phosophatase PP1 | transcript_product=serine/threonine phosophatase PP1 | location=TGGT1_chrXI:1487440-1488915(-) | protein_length=306 | sequence_SO=chromosome | SO=protein_coding | is_pseudo=false	TGGT1_310700-t26_1-p1	35 kDa	0.998582	8	1	438532	477730	458971	0.9	0.85	0.9
TRUE	Empty	TGGT1_271050-t26_1-p1 | transcript=TGGT1_271050-t26_1 | gene=TGGT1_271050 | organism=Toxoplasma_gondii_GT1 | gene_product=SAG-related sequence SRS34A | transcript_product=SAG-related sequence SRS34A | location=TGGT1_chrVIII:4754604-4755164(+) | protein_length=186 | sequence_SO=chromosome | SO=protein_coding | is_pseudo=false	TGGT1_271050-t26_1-p1	19 kDa	0.99855	8	1	281864800	192566300	235515100	0.58	0.37	0.36
TRUE	Empty	TGGT1_230180-t26_1-p1 | transcript=TGGT1_230180-t26_1 | gene=TGGT1_230180 | organism=Toxoplasma_gondii_GT1 | gene_product=hypothetical protein | transcript_product=hypothetical protein | location=TGGT1_chrVIII:662231-666509(-) | protein_length=542 | sequence_SO=chromosome | SO=protein_coding | is_pseudo=false	TGGT1_230180-t26_1-p1	57 kDa	0.998525	8	1	4513370	4039397	3819625	0.83	0.31	0.55
TRUE	Empty	TGGT1_248890-t26_1-p1 | transcript=TGGT1_248890-t26_1 | gene=TGGT1_248890 | organism=Toxoplasma_gondii_GT1 | gene_product=actin-like protein ALP3b | transcript_product=actin-like protein ALP3b | location=TGGT1_chrXII:4176089-4179040(+) | protein_length=567 | sequence_SO=chromosome | SO=protein_coding | is_pseudo=false	TGGT1_248890-t26_1-p1	61 kDa	0.998489	8	1	1394807	1027453	1093991	0.69	0.25	0.37
TRUE	Empty	TGGT1_252290-t26_1-p1 | transcript=TGGT1_252290-t26_1 | gene=TGGT1_252290 | organism=Toxoplasma_gondii_GT1 | gene_product=putative importin alpha | transcript_product=putative importin alpha | location=TGGT1_chrIII:450884-460151(+) | protein_length=545 | sequence_SO=chromosome | SO=protein_coding | is_pseudo=false	TGGT1_252290-t26_1-p1	59 kDa	0.99845	8	1	6526991	6021564	6527184	0.64	0.59	1
TRUE	Empty	TGGT1_285980A-t26_1-p1 | transcript=TGGT1_285980A-t26_1 | gene=TGGT1_285980A | organism=Toxoplasma_gondii_GT1 | gene_product=glucosephosphate-mutase GPM1 | transcript_product=glucosephosphate-mutase GPM1 | location=TGGT1_chrV:1947082-1953082(-) | protein_length=361 | sequence_SO=chromosome | SO=protein_coding | is_pseudo=false	TGGT1_285980A-t26_1-p1	39 kDa	0.998394	7	1	557392	532569	524960	0.82	0.58	0.48
TRUE	Empty	TGGT1_273460-t26_1-p1 | transcript=TGGT1_273460-t26_1 | gene=TGGT1_273460 | organism=Toxoplasma_gondii_GT1 | gene_product=eukaryotic translation initiation factor 3 subunit 6 interacting protein | transcript_product=eukaryotic translation initiation factor 3 subunit 6 interacting protein | location=TGGT1_chrVIII:3489847-3495730(-) | protein_length=639 | sequence_SO=chromosome | SO=protein_coding …	TGGT1_273460-t26_1-p1	75 kDa	0.998326	8	1	1412921	1454622	1150338	0.39	0.92	0.27
TRUE	Empty	TGGT1_216510-t26_1-p1 | transcript=TGGT1_216510-t26_1 | gene=TGGT1_216510 | organism=Toxoplasma_gondii_GT1 | gene_product=putative thioredoxin | transcript_product=putative thioredoxin | location=TGGT1_chrXI:6017453-6023903(+) | protein_length=714 | sequence_SO=chromosome | SO=protein_coding | is_pseudo=false	TGGT1_216510-t26_1-p1	79 kDa	0.9983	8	1	3136558	3998062	4136958	0.94	0.32	0.58
TRUE	Empty	TGGT1_286590-t26_1-p1 | transcript=TGGT1_286590-t26_1 | gene=TGGT1_286590 | organism=Toxoplasma_gondii_GT1 | gene_product=microtubule associated protein SPM2 | transcript_product=microtubule associated protein SPM2 | location=TGGT1_chrV:1625039-1626577(+) | protein_length=357 | sequence_SO=chromosome | SO=protein_coding | is_pseudo=false	TGGT1_286590-t26_1-p1	40 kDa	0.998268	8	1	7452599	7289114	6485708	0.064	0.73	0.12
TRUE	Empty	TGGT1_294560-t26_1-p1 | transcript=TGGT1_294560-t26_1 | gene=TGGT1_294560 | organism=Toxoplasma_gondii_GT1 | gene_product=rhoptry kinase family protein ROP37 (incomplete catalytic triad) | transcript_product=rhoptry kinase family protein ROP37 (incomplete catalytic triad) | location=TGGT1_chrIa:950597-952927(-) | protein_length=776 | sequence_SO=chromosome | SO=protein_coding | is_pseudo=false	TGGT1_294560-t26_1-p1	84 kDa	0.998176	8	1	1178255	1418738	1058625	0.38	0.19	0.72
TRUE	Empty	TGGT1_246130-t26_1-p1 | transcript=TGGT1_246130-t26_1 | gene=TGGT1_246130 | organism=Toxoplasma_gondii_GT1 | gene_product=serpin (serine proteinase inhibitor) superfamily protein | transcript_product=serpin (serine proteinase inhibitor) superfamily protein | location=TGGT1_chrXII:2610457-2612239(+) | protein_length=432 | sequence_SO=chromosome | SO=protein_coding | is_pseudo=false	TGGT1_246130-t26_1-p1	47 kDa	0.998148	8	1	1996714	2663158	2267702	0.81	0.27	0.85
TRUE	Empty	TGGT1_201400-t26_1-p1 | transcript=TGGT1_201400-t26_1 | gene=TGGT1_201400 | organism=Toxoplasma_gondii_GT1 | gene_product=Sin3-associated polypeptide SAP18 | transcript_product=Sin3-associated polypeptide SAP18 | location=TGGT1_chrVIIa:3801972-3807611(-) | protein_length=868 | sequence_SO=chromosome | SO=protein_coding | is_pseudo=false	TGGT1_201400-t26_1-p1	97 kDa	0.998137	8	1	4343791	3412630	7165391	0.33	0.74	0.3
TRUE	Empty	TGGT1_238100-t26_1-p1 | transcript=TGGT1_238100-t26_1 | gene=TGGT1_238100 | organism=Toxoplasma_gondii_GT1 | gene_product=transmembrane protein | transcript_product=transmembrane protein | location=TGGT1_chrVI:63589-66092(-) | protein_length=240 | sequence_SO=chromosome | SO=protein_coding | is_pseudo=false	TGGT1_238100-t26_1-p1	27 kDa	0.998036	8	1	9404945	10175640	9406421	0.69	0.8	1
TRUE	Empty	TGGT1_253700-t26_1-p1 | transcript=TGGT1_253700-t26_1 | gene=TGGT1_253700 | organism=Toxoplasma_gondii_GT1 | gene_product=transporter, major facilitator family protein | transcript_product=transporter, major facilitator family protein | location=TGGT1_chrIII:1085722-1092339(-) | protein_length=1302 | sequence_SO=chromosome | SO=protein_coding | is_pseudo=false	TGGT1_253700-t26_1-p1	138 kDa	0.997774	8	1	376601	446998	273509	0.078	0.52	0.23
TRUE	Empty	TGGT1_266990-t26_1-p1 | transcript=TGGT1_266990-t26_1 | gene=TGGT1_266990 | organism=Toxoplasma_gondii_GT1 | gene_product=beta-COP | transcript_product=beta-COP | location=TGGT1_chrIX:687782-698362(+) | protein_length=1103 | sequence_SO=chromosome | SO=protein_coding | is_pseudo=false	TGGT1_266990-t26_1-p1	122 kDa	0.997694	8	1	825166	739856	747134	0.97	0.61	0.66
TRUE	Empty	TGGT1_239260-t26_1-p1 | transcript=TGGT1_239260-t26_1 | gene=TGGT1_239260 | organism=Toxoplasma_gondii_GT1 | gene_product=histone H4 | transcript_product=histone H4 | location=TGGT1_chrVI:491746-492057(-) | protein_length=103 | sequence_SO=chromosome | SO=protein_coding | is_pseudo=false	TGGT1_239260-t26_1-p1	11 kDa	0.997634	8	1	11390560	11899480	11115710	0.85	0.91	0.96
TRUE	Empty	TGGT1_232250-t26_1-p1 | transcript=TGGT1_232250-t26_1 | gene=TGGT1_232250 | organism=Toxoplasma_gondii_GT1 | gene_product=catalase | transcript_product=catalase | location=TGGT1_chrVIII:1969434-1975537(-) | protein_length=502 | sequence_SO=chromosome | SO=protein_coding | is_pseudo=false	TGGT1_232250-t26_1-p1	57 kDa	0.997607	8	1	3463149	4153406	3102036	0.36	0.75	0.86
TRUE	Empty	TGGT1_273130-t26_1-p1 | transcript=TGGT1_273130-t26_1 | gene=TGGT1_273130 | organism=Toxoplasma_gondii_GT1 | gene_product=SAG-related sequence SRS30A | transcript_product=SAG-related sequence SRS30A | location=TGGT1_chrVIII:3638958-3640118(-) | protein_length=362 | sequence_SO=chromosome | SO=protein_coding | is_pseudo=false	TGGT1_273130-t26_1-p1	38 kDa	0.997603	8	0.88	4121638	4692836	2966245	0.22	0.056	0.33
TRUE	Empty	TGGT1_240870-t26_1-p1 | transcript=TGGT1_240870-t26_1 | gene=TGGT1_240870 | organism=Toxoplasma_gondii_GT1 | gene_product=putative beta adaptin protein | transcript_product=putative beta adaptin protein | location=TGGT1_chrVI:1457492-1470206(+) | protein_length=924 | sequence_SO=chromosome | SO=protein_coding | is_pseudo=false	TGGT1_240870-t26_1-p1	102 kDa	0.997439	8	1	603109	674101	642689	0.41	0.69	0.81
TRUE	Empty	TGGT1_233000-t26_1-p1 | transcript=TGGT1_233000-t26_1 | gene=TGGT1_233000 | organism=Toxoplasma_gondii_GT1 | gene_product=KOW motif domain-containing protein | transcript_product=KOW motif domain-containing protein | location=TGGT1_chrVIII:2313902-2327775(-) | protein_length=1179 | sequence_SO=chromosome | SO=protein_coding | is_pseudo=false	TGGT1_233000-t26_1-p1	127 kDa	0.997421	8	1	1171031	1128557	1346173	0.51	0.83	0.65
TRUE	Empty	TGGT1_311360-t26_1-p1 | transcript=TGGT1_311360-t26_1 | gene=TGGT1_311360 | organism=Toxoplasma_gondii_GT1 | gene_product=protein kinase G AGC kinase family member PKG | transcript_product=protein kinase G AGC kinase family member PKG | location=TGGT1_chrXI:1956120-1971174(-) | protein_length=994 | sequence_SO=chromosome | SO=protein_coding | is_pseudo=false	TGGT1_311360-t26_1-p1	111 kDa	0.997418	8	1	726498	855266	698622	0.17	0.41	0.83
TRUE	Empty	TGGT1_278440-t26_1-p1 | transcript=TGGT1_278440-t26_1 | gene=TGGT1_278440 | organism=Toxoplasma_gondii_GT1 | gene_product=putative SWI2/SNF2 Brahma | transcript_product=putative SWI2/SNF2 Brahma | location=TGGT1_chrXII:6010021-6025169(+) | protein_length=2667 | sequence_SO=chromosome | SO=protein_coding | is_pseudo=false	TGGT1_278440-t26_1-p1	285 kDa	0.997352	8	1	972858	950860	1038207	0.8	0.93	0.84
TRUE	Empty	TGGT1_212960B-t26_1-p1 | transcript=TGGT1_212960B-t26_1 | gene=TGGT1_212960B | organism=Toxoplasma_gondii_GT1 | gene_product=hypothetical protein | transcript_product=hypothetical protein | location=TGGT1_chrV:599015-602482(+) | protein_length=370 | sequence_SO=chromosome | SO=protein_coding | is_pseudo=false	TGGT1_212960B-t26_1-p1	43 kDa	0.997295	8	1	2645056	2490054	2783609	0.72	0.37	0.87
TRUE	Empty	TGGT1_225150-t26_1-p1 | transcript=TGGT1_225150-t26_1 | gene=TGGT1_225150 | organism=Toxoplasma_gondii_GT1 | gene_product=hypothetical protein | transcript_product=hypothetical protein | location=TGGT1_chrX:2357556-2361015(+) | protein_length=691 | sequence_SO=chromosome | SO=protein_coding | is_pseudo=false	TGGT1_225150-t26_1-p1	77 kDa	0.997206	8	1	3590448	3407639	2986985	0.46	0.47	0.31
TRUE	Empty	TGGT1_243800-t26_1-p1 | transcript=TGGT1_243800-t26_1 | gene=TGGT1_243800 | organism=Toxoplasma_gondii_GT1 | gene_product=putative long-chain fatty acid CoA ligase | transcript_product=putative long-chain fatty acid CoA ligase | location=TGGT1_chrVI:2778396-2788707(-) | protein_length=758 | sequence_SO=chromosome | SO=protein_coding | is_pseudo=false	TGGT1_243800-t26_1-p1	84 kDa	0.997159	8	1	2965425	2593152	2445575	0.66	0.25	0.16
TRUE	Empty	TGGT1_248120-t26_1-p1 | transcript=TGGT1_248120-t26_1 | gene=TGGT1_248120 | organism=Toxoplasma_gondii_GT1 | gene_product=hypothetical protein | transcript_product=hypothetical protein | location=TGGT1_chrXII:3601439-3608088(-) | protein_length=962 | sequence_SO=chromosome | SO=protein_coding | is_pseudo=false	TGGT1_248120-t26_1-p1	101 kDa	0.997138	8	1	1580180	1690210	1394810	0.55	0.7	0.73
TRUE	Empty	TGGT1_205580-t26_1-p1 | transcript=TGGT1_205580-t26_1 | gene=TGGT1_205580 | organism=Toxoplasma_gondii_GT1 | gene_product=nuclear factor NF4 | transcript_product=nuclear factor NF4 | location=TGGT1_chrVIIa:1205711-1209756(+) | protein_length=497 | sequence_SO=chromosome | SO=protein_coding | is_pseudo=false	TGGT1_205580-t26_1-p1	51 kDa	0.997108	8	1	5206159	6141976	6211680	0.84	0.48	0.45
TRUE	Empty	TGGT1_304460-t26_1-p1 | transcript=TGGT1_304460-t26_1 | gene=TGGT1_304460 | organism=Toxoplasma_gondii_GT1 | gene_product=zinc finger, C3HC4 type (RING finger) domain-containing protein | transcript_product=zinc finger, C3HC4 type (RING finger) domain-containing protein | location=TGGT1_chrVIIa:480986-484840(-) | protein_length=710 | sequence_SO=chromosome | SO=protein_coding | is_pseudo=false	TGGT1_304460-t26_1-p1	77 kDa	0.99703	8	1	909211	1021347	934294	0.61	0.57	0.92
TRUE	Empty	TGGT1_268890-t26_1-p1 | transcript=TGGT1_268890-t26_1 | gene=TGGT1_268890 | organism=Toxoplasma_gondii_GT1 | gene_product=citrate synthase I | transcript_product=citrate synthase I | location=TGGT1_chrVIII:6220882-6228739(+) | protein_length=560 | sequence_SO=chromosome | SO=protein_coding | is_pseudo=false	TGGT1_268890-t26_1-p1	60 kDa	0.996998	8	1	10083930	13187200	8910803	0.11	0.13	0.54
TRUE	Empty	TGGT1_202490-t26_1-p1 | transcript=TGGT1_202490-t26_1 | gene=TGGT1_202490 | organism=Toxoplasma_gondii_GT1 | gene_product=AP2 domain transcription factor AP2VIIa-7 | transcript_product=AP2 domain transcription factor AP2VIIa-7 | location=TGGT1_chrVIIa:3177832-3190947(-) | protein_length=3116 | sequence_SO=chromosome | SO=protein_coding | is_pseudo=false	TGGT1_202490-t26_1-p1	331 kDa	0.996933	8	1	637342	920706	690704	0.26	0.65	0.92
TRUE	Empty	TGGT1_263320-t26_1-p1 | transcript=TGGT1_263320-t26_1 | gene=TGGT1_263320 | organism=Toxoplasma_gondii_GT1 | gene_product=hypothetical protein | transcript_product=hypothetical protein | location=TGGT1_chrVIIb:613192-614403(-) | protein_length=403 | sequence_SO=chromosome | SO=protein_coding | is_pseudo=false	TGGT1_263320-t26_1-p1	42 kDa	0.996714	8	1	6578381	6502049	6986256	0.71	0.96	0.79
TRUE	Empty	TGGT1_251500-t26_1-p1 | transcript=TGGT1_251500-t26_1 | gene=TGGT1_251500 | organism=Toxoplasma_gondii_GT1 | gene_product=putative eukaryotic initiation factor-3, subunit 3 | transcript_product=putative eukaryotic initiation factor-3, subunit 3 | location=TGGT1_chrXII:5353371-5356184(+) | protein_length=600 | sequence_SO=chromosome | SO=protein_coding | is_pseudo=false	TGGT1_251500-t26_1-p1	66 kDa	0.996653	8	1	1272149	1226665	1496300	0.63	0.71	0.7
TRUE	Empty	TGGT1_288860-t26_1-p1 | transcript=TGGT1_288860-t26_1 | gene=TGGT1_288860 | organism=Toxoplasma_gondii_GT1 | gene_product=RuvB family 2 protein | transcript_product=RuvB family 2 protein | location=TGGT1_chrIX:2586575-2593961(-) | protein_length=508 | sequence_SO=chromosome | SO=protein_coding | is_pseudo=false	TGGT1_288860-t26_1-p1	55 kDa	0.996621	8	0.88	690738	661451	561657	0.71	0.87	0.66
TRUE	Empty	TGGT1_217220-t26_1-p1 | transcript=TGGT1_217220-t26_1 | gene=TGGT1_217220 | organism=Toxoplasma_gondii_GT1 | gene_product=zinc finger, C3HC4 type (RING finger) domain-containing protein | transcript_product=zinc finger, C3HC4 type (RING finger) domain-containing protein | location=TGGT1_chrXI:5563422-5578268(-) | protein_length=1027 | sequence_SO=chromosome | SO=protein_coding | is_pseudo=false	TGGT1_217220-t26_1-p1	115 kDa	0.996495	8	1	1613796	971844	1586651	0.29	0.45	0.98
TRUE	Empty	TGGT1_227060-t26_1-p1 | transcript=TGGT1_227060-t26_1 | gene=TGGT1_227060 | organism=Toxoplasma_gondii_GT1 | gene_product=hypothetical protein | transcript_product=hypothetical protein | location=TGGT1_chrX:1013160-1025615(+) | protein_length=1273 | sequence_SO=chromosome | SO=protein_coding | is_pseudo=false	TGGT1_227060-t26_1-p1	139 kDa	0.99643	8	1	1055429	937830	1152559	0.069	0.74	0.81
TRUE	Empty	TGGT1_263040-t26_1-p1 | transcript=TGGT1_263040-t26_1 | gene=TGGT1_263040 | organism=Toxoplasma_gondii_GT1 | gene_product=ribosomal protein RPS16 | transcript_product=ribosomal protein RPS16 | location=TGGT1_chrVIIb:830975-832663(+) | protein_length=211 | sequence_SO=chromosome | SO=protein_coding | is_pseudo=false	TGGT1_263040-t26_1-p1	24 kDa	0.996322	8	1	23437470	24713370	26508700	0.5	0.65	0.31
TRUE	Empty	TGGT1_305290-t26_1-p1 | transcript=TGGT1_305290-t26_1 | gene=TGGT1_305290 | organism=Toxoplasma_gondii_GT1 | gene_product=putative vacuolar atp synthase subunit e | transcript_product=putative vacuolar atp synthase subunit e | location=TGGT1_chrIX:5114879-5118006(-) | protein_length=345 | sequence_SO=chromosome | SO=protein_coding | is_pseudo=false	TGGT1_305290-t26_1-p1	39 kDa	0.996213	8	1	4514748	4058660	3519892	0.17	0.1	0.079
TRUE	Empty	TGGT1_314860-t26_1-p1 | transcript=TGGT1_314860-t26_1 | gene=TGGT1_314860 | organism=Toxoplasma_gondii_GT1 | gene_product=zinc knuckle domain-containing protein | transcript_product=zinc knuckle domain-containing protein | location=TGGT1_chrXI:4300601-4307788(+) | protein_length=723 | sequence_SO=chromosome | SO=protein_coding | is_pseudo=false	TGGT1_314860-t26_1-p1	76 kDa	0.996012	7	1	2025432	2104725	2608331	0.35	0.86	0.14
TRUE	Empty	TGGT1_266640-t26_1-p1 | transcript=TGGT1_266640-t26_1 | gene=TGGT1_266640 | organism=Toxoplasma_gondii_GT1 | gene_product=putative Acetyl-coenzyme A synthetase 2 | transcript_product=putative Acetyl-coenzyme A synthetase 2 | location=TGGT1_chrIX:887254-895827(+) | protein_length=714 | sequence_SO=chromosome | SO=protein_coding | is_pseudo=false	TGGT1_266640-t26_1-p1	80 kDa	0.995871	7	1	718133	786717	1473241	0.24	0.72	0.21
TRUE	Empty	TGGT1_226580-t26_1-p1 | transcript=TGGT1_226580-t26_1 | gene=TGGT1_226580 | organism=Toxoplasma_gondii_GT1 | gene_product=hypothetical protein | transcript_product=hypothetical protein | location=TGGT1_chrX:1431734-1436682(-) | protein_length=380 | sequence_SO=chromosome | SO=protein_coding | is_pseudo=false	TGGT1_226580-t26_1-p1	43 kDa	0.995494	8	1	3123526	3386535	2913139	0.11	0.59	0.64
TRUE	Empty	TGGT1_273370-t26_1-p1 | transcript=TGGT1_273370-t26_1 | gene=TGGT1_273370 | organism=Toxoplasma_gondii_GT1 | gene_product=putative coatomer gamma 2-subunit protein | transcript_product=putative coatomer gamma 2-subunit protein | location=TGGT1_chrVIII:3554530-3558659(-) | protein_length=1044 | sequence_SO=chromosome | SO=protein_coding | is_pseudo=false	TGGT1_273370-t26_1-p1	112 kDa	0.995362	8	1	545185	463410	414843	0.65	0.53	0.18
TRUE	Empty	TGGT1_309570-t26_1-p1 | transcript=TGGT1_309570-t26_1 | gene=TGGT1_309570 | organism=Toxoplasma_gondii_GT1 | gene_product=DEAD/DEAH box helicase domain-containing protein | transcript_product=DEAD/DEAH box helicase domain-containing protein | location=TGGT1_chrXI:692622-695126(-) | protein_length=834 | sequence_SO=chromosome | SO=protein_coding | is_pseudo=false	TGGT1_309570-t26_1-p1	91 kDa	0.995033	8	1	1846417	2017969	2942391	0.23	0.81	0.24
TRUE	Empty	TGGT1_219850-t26_1-p1 | transcript=TGGT1_219850-t26_1 | gene=TGGT1_219850 | organism=Toxoplasma_gondii_GT1 | gene_product=prolyl-tRNA synthetase (ProRS) | transcript_product=prolyl-tRNA synthetase (ProRS) | location=TGGT1_chrXII:529404-538395(-) | protein_length=830 | sequence_SO=chromosome | SO=protein_coding | is_pseudo=false	TGGT1_219850-t26_1-p1	93 kDa	0.994864	8	1	490921	468542	403169	0.66	0.79	0.53
TRUE	Empty	TGGT1_212220-t26_1-p1 | transcript=TGGT1_212220-t26_1 | gene=TGGT1_212220 | organism=Toxoplasma_gondii_GT1 | gene_product=hypothetical protein | transcript_product=hypothetical protein | location=TGGT1_chrX:3876902-3879847(+) | protein_length=981 | sequence_SO=chromosome | SO=protein_coding | is_pseudo=false	TGGT1_212220-t26_1-p1	108 kDa	0.994787	8	1	1545258	1641392	1349854	0.29	0.67	0.44
TRUE	Empty	TGGT1_266630-t26_1-p1 | transcript=TGGT1_266630-t26_1 | gene=TGGT1_266630 | organism=Toxoplasma_gondii_GT1 | gene_product=hypothetical protein | transcript_product=hypothetical protein | location=TGGT1_chrIX:900290-905135(+) | protein_length=582 | sequence_SO=chromosome | SO=protein_coding | is_pseudo=false	TGGT1_266630-t26_1-p1	67 kDa	0.994745	8	1	2391596	3463784	3176231	0.15	0.41	0.52
TRUE	Empty	TGGT1_221180-t26_1-p1 | transcript=TGGT1_221180-t26_1 | gene=TGGT1_221180 | organism=Toxoplasma_gondii_GT1 | gene_product=hypothetical protein | transcript_product=hypothetical protein | location=TGGT1_chrII:92416-97666(-) | protein_length=791 | sequence_SO=chromosome | SO=protein_coding | is_pseudo=false	TGGT1_221180-t26_1-p1	79 kDa	0.994654	8	1	3884708	5386185	3732776	0.038	0.08	0.65
TRUE	Empty	TGGT1_232680-t26_1-p1 | transcript=TGGT1_232680-t26_1 | gene=TGGT1_232680 | organism=Toxoplasma_gondii_GT1 | gene_product=hypothetical protein | transcript_product=hypothetical protein | location=TGGT1_chrVIII:2216288-2225214(-) | protein_length=1738 | sequence_SO=chromosome | SO=protein_coding | is_pseudo=false	TGGT1_232680-t26_1-p1	180 kDa	0.994424	8	1	811944	616702	883519	0.17	0.22	0.73
TRUE	Empty	TGGT1_290910-t26_1-p1 | transcript=TGGT1_290910-t26_1 | gene=TGGT1_290910 | organism=Toxoplasma_gondii_GT1 | gene_product=hypothetical protein | transcript_product=hypothetical protein | location=TGGT1_chrIX:3738106-3743566(+) | protein_length=961 | sequence_SO=chromosome | SO=protein_coding | is_pseudo=false	TGGT1_290910-t26_1-p1	106 kDa	0.993743	8	1	2995334	2640703	3003517	0.74	0.54	0.99
TRUE	Empty	TGGT1_277500-t26_1-p1 | transcript=TGGT1_277500-t26_1 | gene=TGGT1_277500 | organism=Toxoplasma_gondii_GT1 | gene_product=putative 26S proteasome regulatory subunit 7 | transcript_product=putative 26S proteasome regulatory subunit 7 | location=TGGT1_chrXII:6576106-6581002(+) | protein_length=476 | sequence_SO=chromosome | SO=protein_coding | is_pseudo=false	TGGT1_277500-t26_1-p1	52 kDa	0.993529	8	1	857323	801812	901746	0.13	0.067	0.4
TRUE	Empty	TGGT1_232300-t26_1-p1 | transcript=TGGT1_232300-t26_1 | gene=TGGT1_232300 | organism=Toxoplasma_gondii_GT1 | gene_product=ribosomal protein RPS3 | transcript_product=ribosomal protein RPS3 | location=TGGT1_chrVIII:1993673-1994649(-) | protein_length=255 | sequence_SO=chromosome | SO=protein_coding | is_pseudo=false	TGGT1_232300-t26_1-p1	29 kDa	0.993137	8	1	12110110	14567770	14711690	0.94	0.28	0.18
TRUE	Empty	TGGT1_305850-t26_1-p1 | transcript=TGGT1_305850-t26_1 | gene=TGGT1_305850 | organism=Toxoplasma_gondii_GT1 | gene_product=RNA recognition motif-containing protein | transcript_product=RNA recognition motif-containing protein | location=TGGT1_chrIX:5399604-5403723(-) | protein_length=372 | sequence_SO=chromosome | SO=protein_coding | is_pseudo=false	TGGT1_305850-t26_1-p1	39 kDa	0.993082	8	1	3205787	3144917	3562821	0.33	0.87	0.23
TRUE	Empty	TGGT1_238190-t26_1-p1 | transcript=TGGT1_238190-t26_1 | gene=TGGT1_238190 | organism=Toxoplasma_gondii_GT1 | gene_product=DNA-directed RNA polymerase II RPB3 | transcript_product=DNA-directed RNA polymerase II RPB3 | location=TGGT1_chrVI:112159-117682(+) | protein_length=484 | sequence_SO=chromosome | SO=protein_coding | is_pseudo=false	TGGT1_238190-t26_1-p1	52 kDa	0.993017	8	1	1070080	1334295	1175090	0.76	0.63	0.87
TRUE	Empty	TGGT1_249530-t26_1-p1 | transcript=TGGT1_249530-t26_1 | gene=TGGT1_249530 | organism=Toxoplasma_gondii_GT1 | gene_product=putative exportin 1 | transcript_product=putative exportin 1 | location=TGGT1_chrXII:4524784-4539887(+) | protein_length=1125 | sequence_SO=chromosome | SO=protein_coding | is_pseudo=false	TGGT1_249530-t26_1-p1	129 kDa	0.992524	8	1	829182	550758	461095	0.49	0.19	0.01
TRUE	Empty	TGGT1_291680-t26_1-p1 | transcript=TGGT1_291680-t26_1 | gene=TGGT1_291680 | organism=Toxoplasma_gondii_GT1 | gene_product=Sec23/Sec24 trunk domain-containing protein | transcript_product=Sec23/Sec24 trunk domain-containing protein | location=TGGT1_chrIX:4131104-4145209(-) | protein_length=791 | sequence_SO=chromosome | SO=protein_coding | is_pseudo=false	TGGT1_291680-t26_1-p1	88 kDa	0.991633	8	1	1528363	1008522	2171174	0.5	0.38	0.76
TRUE	Empty	TGGT1_278890-t26_1-p1 | transcript=TGGT1_278890-t26_1 | gene=TGGT1_278890 | organism=Toxoplasma_gondii_GT1 | gene_product=hypothetical protein | transcript_product=hypothetical protein | location=TGGT1_chrXII:5691113-5698851(+) | protein_length=1101 | sequence_SO=chromosome | SO=protein_coding | is_pseudo=false	TGGT1_278890-t26_1-p1	119 kDa	0.990058	8	1	1028102	841434	873316	0.72	0.47	0.53
TRUE	Empty	TGGT1_238040B-t26_1-p1 | transcript=TGGT1_238040B-t26_1 | gene=TGGT1_238040B | organism=Toxoplasma_gondii_GT1 | gene_product=protein disulfide-isomerase domain-containing protein | transcript_product=protein disulfide-isomerase domain-containing protein | location=TGGT1_chrVI:18696-19445(-) | protein_length=203 | sequence_SO=chromosome | SO=protein_coding | is_pseudo=false	TGGT1_238040B-t26_1-p1	23 kDa	0.988026	8	0.5	659968	736366	540410	0.37	0.71	0.62
TRUE	Empty	TGGT1_261430-t26_1-p1 | transcript=TGGT1_261430-t26_1 | gene=TGGT1_261430 | organism=Toxoplasma_gondii_GT1 | gene_product=hypothetical protein | transcript_product=hypothetical protein | location=TGGT1_chrVIIb:1731479-1735470(-) | protein_length=1072 | sequence_SO=chromosome | SO=protein_coding | is_pseudo=false	TGGT1_261430-t26_1-p1	117 kDa	0.987937	8	1	1332888	1650020	1420125	0.032	0.39	0.78
TRUE	Empty	TGGT1_205360-t26_1-p1 | transcript=TGGT1_205360-t26_1 | gene=TGGT1_205360 | organism=Toxoplasma_gondii_GT1 | gene_product=hypothetical protein | transcript_product=hypothetical protein | location=TGGT1_chrVIIa:1355158-1371232(+) | protein_length=2607 | sequence_SO=chromosome | SO=protein_coding | is_pseudo=false	TGGT1_205360-t26_1-p1	293 kDa	0.985695	8	1	428756	661885	514623	0.12	0.026	0.15
TRUE	Empty	TGGT1_313990-t26_1-p1 | transcript=TGGT1_313990-t26_1 | gene=TGGT1_313990 | organism=Toxoplasma_gondii_GT1 | gene_product=CBF/Mak21 family protein | transcript_product=CBF/Mak21 family protein | location=TGGT1_chrXI:3822824-3831741(+) | protein_length=1361 | sequence_SO=chromosome | SO=protein_coding | is_pseudo=false	TGGT1_313990-t26_1-p1	149 kDa	0.984932	8	1	2496723	2993003	2796533	0.43	0.055	0.27
TRUE	Empty	TGGT1_275440-t26_1-p1 | transcript=TGGT1_275440-t26_1 | gene=TGGT1_275440 | organism=Toxoplasma_gondii_GT1 | gene_product=dense granule protein GRA6 | transcript_product=dense granule protein GRA6 | location=TGGT1_chrX:7158307-7158999(-) | protein_length=223 | sequence_SO=chromosome | SO=protein_coding | is_pseudo=false	TGGT1_275440-t26_1-p1	23 kDa	0.999999	6	1	7764191	7562526	8586364	0.64	0.74	0.7
TRUE	Empty	TGGT1_244110-t26_1-p1 | transcript=TGGT1_244110-t26_1 | gene=TGGT1_244110 | organism=Toxoplasma_gondii_GT1 | gene_product=nucleosome assembly protein (nap) protein | transcript_product=nucleosome assembly protein (nap) protein | location=TGGT1_chrVI:2942300-2948890(+) | protein_length=738 | sequence_SO=chromosome | SO=protein_coding | is_pseudo=false	TGGT1_244110-t26_1-p1	84 kDa	0.999993	7	1	1707328	1754267	1540451	0.37	0.87	0.41
TRUE	Empty	TGGT1_204060-t26_1-p1 | transcript=TGGT1_204060-t26_1 | gene=TGGT1_204060 | organism=Toxoplasma_gondii_GT1 | gene_product=SNARE domain-containing protein | transcript_product=SNARE domain-containing protein | location=TGGT1_chrVIIa:1922878-1928958(+) | protein_length=494 | sequence_SO=chromosome | SO=protein_coding | is_pseudo=false	TGGT1_204060-t26_1-p1	54 kDa	0.999991	7	1	950987	941681	882534	0.019	0.89	0.37
TRUE	Empty	TGGT1_209260-t26_1-p1 | transcript=TGGT1_209260-t26_1 | gene=TGGT1_209260 | organism=Toxoplasma_gondii_GT1 | gene_product=putative cytochrome c oxidase subunit | transcript_product=putative cytochrome c oxidase subunit | location=TGGT1_chrIb:1169758-1172481(-) | protein_length=310 | sequence_SO=chromosome | SO=protein_coding | is_pseudo=false	TGGT1_209260-t26_1-p1	35 kDa	0.999991	7	1	3220403	4735678	3185367	0.051	0.26	0.97
TRUE	Empty	TGGT1_214880-t26_1-p1 | transcript=TGGT1_214880-t26_1 | gene=TGGT1_214880 | organism=Toxoplasma_gondii_GT1 | gene_product=hypothetical protein | transcript_product=hypothetical protein | location=TGGT1_chrX:6454346-6458141(-) | protein_length=931 | sequence_SO=chromosome | SO=protein_coding | is_pseudo=false	TGGT1_214880-t26_1-p1	98 kDa	0.99999	7	1	1863257	2058320	1413498	0.019	0.62	0.24
TRUE	Empty	TGGT1_219860-t26_1-p1 | transcript=TGGT1_219860-t26_1 | gene=TGGT1_219860 | organism=Toxoplasma_gondii_GT1 | gene_product=putative replication licensing factor | transcript_product=putative replication licensing factor | location=TGGT1_chrXII:515884-525132(-) | protein_length=972 | sequence_SO=chromosome | SO=protein_coding | is_pseudo=false	TGGT1_219860-t26_1-p1	108 kDa	0.99999	7	1	1314995	1609289	1283757	0.57	0.39	0.95
TRUE	Empty	TGGT1_226320-t26_1-p1 | transcript=TGGT1_226320-t26_1 | gene=TGGT1_226320 | organism=Toxoplasma_gondii_GT1 | gene_product=hypothetical protein | transcript_product=hypothetical protein | location=TGGT1_chrX:1627498-1631184(+) | protein_length=720 | sequence_SO=chromosome | SO=protein_coding | is_pseudo=false	TGGT1_226320-t26_1-p1	74 kDa	0.999959	7	1	6938882	6852692	7843808	0.5	0.93	0.52
TRUE	Empty	TGGT1_315220-t26_1-p1 | transcript=TGGT1_315220-t26_1 | gene=TGGT1_315220 | organism=Toxoplasma_gondii_GT1 | gene_product=rhoptry protein ROP14 | transcript_product=rhoptry protein ROP14 | location=TGGT1_chrXI:4529966-4537996(+) | protein_length=1061 | sequence_SO=chromosome | SO=protein_coding | is_pseudo=false	TGGT1_315220-t26_1-p1	122 kDa	0.999955	7	0.86	3904309	4945547	4015281	0.23	0.34	0.89
TRUE	Empty	TGGT1_227000-t26_1-p1 | transcript=TGGT1_227000-t26_1 | gene=TGGT1_227000 | organism=Toxoplasma_gondii_GT1 | gene_product=hypothetical protein | transcript_product=hypothetical protein | location=TGGT1_chrX:1052036-1062406(+) | protein_length=1082 | sequence_SO=chromosome | SO=protein_coding | is_pseudo=false	TGGT1_227000-t26_1-p1	119 kDa	0.999948	7	1	2406492	2378686	2514133	0.73	0.82	0.79
TRUE	Empty	TGGT1_249670-t26_1-p1 | transcript=TGGT1_249670-t26_1 | gene=TGGT1_249670 | organism=Toxoplasma_gondii_GT1 | gene_product=cathepsin B | transcript_product=cathepsin B | location=TGGT1_chrXII:4657429-4662487(-) | protein_length=569 | sequence_SO=chromosome | SO=protein_coding | is_pseudo=false	TGGT1_249670-t26_1-p1	62 kDa	0.999935	7	1	4780128	4839852	4662749	0.71	0.91	0.86
TRUE	Empty	TGGT1_313290-t26_1-p1 | transcript=TGGT1_313290-t26_1 | gene=TGGT1_313290 | organism=Toxoplasma_gondii_GT1 | gene_product=MORN repeat-containing protein | transcript_product=MORN repeat-containing protein | location=TGGT1_chrXI:3208385-3212332(-) | protein_length=429 | sequence_SO=chromosome | SO=protein_coding | is_pseudo=false	TGGT1_313290-t26_1-p1	46 kDa	0.99993	7	1	2986470	2872957	4128831	0.25	0.85	0.16
TRUE	Empty	TGGT1_293900-t26_1-p1 | transcript=TGGT1_293900-t26_1 | gene=TGGT1_293900 | organism=Toxoplasma_gondii_GT1 | gene_product=sporozoite protein with an altered thrombospondin repeat SPATR | transcript_product=sporozoite protein with an altered thrombospondin repeat SPATR | location=TGGT1_chrIa:619649-624142(+) | protein_length=534 | sequence_SO=chromosome | SO=protein_coding | is_pseudo=false	TGGT1_293900-t26_1-p1	58 kDa	0.999886	7	1	1251615	1488810	920853	0.055	0.2	0.081
TRUE	Empty	TGGT1_228360-t26_1-p1 | transcript=TGGT1_228360-t26_1 | gene=TGGT1_228360 | organism=Toxoplasma_gondii_GT1 | gene_product=putative peptidyl-prolyl isomerase FKBP12 | transcript_product=putative peptidyl-prolyl isomerase FKBP12 | location=TGGT1_chrX:286110-288045(+) | protein_length=362 | sequence_SO=chromosome | SO=protein_coding | is_pseudo=false	TGGT1_228360-t26_1-p1	38 kDa	0.999884	6	1	3037033	2728207	3062001	0.23	0.72	0.98
TRUE	Empty	TGGT1_245610-t26_1-p1 | transcript=TGGT1_245610-t26_1 | gene=TGGT1_245610 | organism=Toxoplasma_gondii_GT1 | gene_product=hypothetical protein | transcript_product=hypothetical protein | location=TGGT1_chrXII:2358915-2369554(+) | protein_length=615 | sequence_SO=chromosome | SO=protein_coding | is_pseudo=false	TGGT1_245610-t26_1-p1	68 kDa	0.999881	7	1	2298454	2902788	2405512	0.3	0.14	0.74
TRUE	Empty	TGGT1_230520-t26_1-p1 | transcript=TGGT1_230520-t26_1 | gene=TGGT1_230520 | organism=Toxoplasma_gondii_GT1 | gene_product=putative cyclophilin 1 | transcript_product=putative cyclophilin 1 | location=TGGT1_chrVIII:844576-845289(+) | protein_length=237 | sequence_SO=chromosome | SO=protein_coding | is_pseudo=false	TGGT1_230520-t26_1-p1	26 kDa	0.999877	6	1	2807794	2890848	2285858	0.52	0.83	0.59
TRUE	Empty	TGGT1_248340-t26_1-p1 | transcript=TGGT1_248340-t26_1 | gene=TGGT1_248340 | organism=Toxoplasma_gondii_GT1 | gene_product=GTP-binding nuclear protein ran/tc4 | transcript_product=GTP-binding nuclear protein ran/tc4 | location=TGGT1_chrXII:3749189-3752256(+) | protein_length=229 | sequence_SO=chromosome | SO=protein_coding | is_pseudo=false	TGGT1_248340-t26_1-p1	26 kDa	0.999873	7	1	8754093	7226075	8078390	0.39	0.23	0.2
TRUE	Empty	TGGT1_310790-t26_1-p1 | transcript=TGGT1_310790-t26_1 | gene=TGGT1_310790 | organism=Toxoplasma_gondii_GT1 | gene_product=hypothetical protein | transcript_product=hypothetical protein | location=TGGT1_chrXI:1556574-1558606(+) | protein_length=219 | sequence_SO=chromosome | SO=protein_coding | is_pseudo=false	TGGT1_310790-t26_1-p1	25 kDa	0.999866	7	1	2227870	5568070	2418132	0.29	0.25	0.72
TRUE	Empty	TGGT1_221380-t26_1-p1 | transcript=TGGT1_221380-t26_1 | gene=TGGT1_221380 | organism=Toxoplasma_gondii_GT1 | gene_product=alba 1 | transcript_product=alba 1 | location=TGGT1_chrII:281451-282798(-) | protein_length=247 | sequence_SO=chromosome | SO=protein_coding | is_pseudo=false	TGGT1_221380-t26_1-p1	27 kDa	0.999837	7	1	17969490	17575910	17407450	0.97	0.93	0.92
TRUE	Empty	TGGT1_261010-t26_1-p1 | transcript=TGGT1_261010-t26_1 | gene=TGGT1_261010 | organism=Toxoplasma_gondii_GT1 | gene_product=putative tat-binding family protein | transcript_product=putative tat-binding family protein | location=TGGT1_chrVIIb:1947162-1952503(-) | protein_length=409 | sequence_SO=chromosome | SO=protein_coding | is_pseudo=false	TGGT1_261010-t26_1-p1	46 kDa	0.999824	7	1	1955766	1825990	2049237	0.43	0.71	0.71
TRUE	Empty	TGGT1_269340-t26_1-p1 | transcript=TGGT1_269340-t26_1 | gene=TGGT1_269340 | organism=Toxoplasma_gondii_GT1 | gene_product=hypothetical protein | transcript_product=hypothetical protein | location=TGGT1_chrVIII:5882050-5885092(-) | protein_length=577 | sequence_SO=chromosome | SO=protein_coding | is_pseudo=false	TGGT1_269340-t26_1-p1	65 kDa	0.999823	7	1	14771380	12519430	19074670	0.043	0.13	0.058
TRUE	Empty	TGGT1_230510-t26_1-p1 | transcript=TGGT1_230510-t26_1 | gene=TGGT1_230510 | organism=Toxoplasma_gondii_GT1 | gene_product=hypothetical protein | transcript_product=hypothetical protein | location=TGGT1_chrVIII:842800-843918(-) | protein_length=372 | sequence_SO=chromosome | SO=protein_coding | is_pseudo=false	TGGT1_230510-t26_1-p1	39 kDa	0.999822	7	1	1195223	1293691	1289018	0.96	0.45	0.52
TRUE	Empty	TGGT1_312090-t26_1-p1 | transcript=TGGT1_312090-t26_1 | gene=TGGT1_312090 | organism=Toxoplasma_gondii_GT1 | gene_product=ribosomal protein RPL23 | transcript_product=ribosomal protein RPL23 | location=TGGT1_chrXI:2381590-2383685(-) | protein_length=139 | sequence_SO=chromosome | SO=protein_coding | is_pseudo=false	TGGT1_312090-t26_1-p1	15 kDa	0.999818	7	1	31285990	25390750	36229510	0.46	0.63	0.78
TRUE	Empty	TGGT1_276170-t26_1-p1 | transcript=TGGT1_276170-t26_1 | gene=TGGT1_276170 | organism=Toxoplasma_gondii_GT1 | gene_product=phosphatidylinositol 3- and 4-kinase | transcript_product=phosphatidylinositol 3- and 4-kinase | location=TGGT1_chrIII:84006-93774(+) | protein_length=1228 | sequence_SO=chromosome | SO=protein_coding | is_pseudo=false	TGGT1_276170-t26_1-p1	135 kDa	0.99981	7	1	628609	426120	623479	0.068	0.19	0.97
TRUE	Empty	TGGT1_299050-t26_1-p1 | transcript=TGGT1_299050-t26_1 | gene=TGGT1_299050 | organism=Toxoplasma_gondii_GT1 | gene_product=ribosomal protein RPL17 | transcript_product=ribosomal protein RPL17 | location=TGGT1_chrIII:2205438-2207707(-) | protein_length=195 | sequence_SO=chromosome | SO=protein_coding | is_pseudo=false	TGGT1_299050-t26_1-p1	22 kDa	0.999809	7	1	51238300	47556130	62100160	0.78	0.91	0.84
TRUE	Empty	TGGT1_219682-t26_1-p1 | transcript=TGGT1_219682-t26_1 | gene=TGGT1_219682 | organism=Toxoplasma_gondii_GT1 | gene_product=putative pyruvate dehydrogenase kinase | transcript_product=putative pyruvate dehydrogenase kinase | location=TGGT1_chrXII:667060-674721(-) | protein_length=756 | sequence_SO=chromosome | SO=protein_coding | is_pseudo=false	TGGT1_219682-t26_1-p1	82 kDa	0.999788	7	1	561820	613307	393627	0.29	0.67	0.31
TRUE	Empty	TGGT1_276180-t26_1-p1 | transcript=TGGT1_276180-t26_1 | gene=TGGT1_276180 | organism=Toxoplasma_gondii_GT1 | gene_product=histone acetyltransferase TAF1/250 | transcript_product=histone acetyltransferase TAF1/250 | location=TGGT1_chrIII:62352-79233(+) | protein_length=2775 | sequence_SO=chromosome | SO=protein_coding | is_pseudo=false	TGGT1_276180-t26_1-p1	296 kDa	0.999788	7	1	682456	569686	615638	0.86	0.43	0.81
TRUE	Empty	TGGT1_226950-t26_1-p1 | transcript=TGGT1_226950-t26_1 | gene=TGGT1_226950 | organism=Toxoplasma_gondii_GT1 | gene_product=IgA-specific metalloendopeptidase | transcript_product=IgA-specific metalloendopeptidase | location=TGGT1_chrX:1106584-1115574(+) | protein_length=2042 | sequence_SO=chromosome | SO=protein_coding | is_pseudo=false	TGGT1_226950-t26_1-p1	218 kDa	0.999771	7	1	1216891	1116352	1259247	0.29	0.7	0.87
TRUE	Empty	TGGT1_283830-t26_1-p1 | transcript=TGGT1_283830-t26_1 | gene=TGGT1_283830 | organism=Toxoplasma_gondii_GT1 | gene_product=type I inorganic pyrophosphatase PPase | transcript_product=type I inorganic pyrophosphatase PPase | location=TGGT1_chrV:2771144-2774020(-) | protein_length=498 | sequence_SO=chromosome | SO=protein_coding | is_pseudo=false	TGGT1_283830-t26_1-p1	54 kDa	0.99977	7	1	1878827	1942773	1822853	0.76	0.88	0.91
TRUE	Empty	TGGT1_297880-t26_1-p1 | transcript=TGGT1_297880-t26_1 | gene=TGGT1_297880 | organism=Toxoplasma_gondii_GT1 | gene_product=dense granule protein DG32 | transcript_product=dense granule protein DG32 | location=TGGT1_chrII:2069382-2070384(-) | protein_length=219 | sequence_SO=chromosome | SO=protein_coding | is_pseudo=false	TGGT1_297880-t26_1-p1	24 kDa	0.999766	7	1	6124703	7069832	5052296	0.054	0.2	0.18
TRUE	Empty	TGGT1_258470-t26_1-p1 | transcript=TGGT1_258470-t26_1 | gene=TGGT1_258470 | organism=Toxoplasma_gondii_GT1 | gene_product=hypothetical protein | transcript_product=hypothetical protein | location=TGGT1_chrVIIb:3369823-3371292(+) | protein_length=284 | sequence_SO=chromosome | SO=protein_coding | is_pseudo=false	TGGT1_258470-t26_1-p1	32 kDa	0.999757	7	1	9112402	9366106	7707284	0.15	0.72	0.13
TRUE	Empty	TGGT1_306650-t26_1-p1 | transcript=TGGT1_306650-t26_1 | gene=TGGT1_306650 | organism=Toxoplasma_gondii_GT1 | gene_product=hypothetical protein | transcript_product=hypothetical protein | location=TGGT1_chrIX:6020484-6022587(-) | protein_length=286 | sequence_SO=chromosome | SO=protein_coding | is_pseudo=false	TGGT1_306650-t26_1-p1	31 kDa	0.999756	7	1	2749984	2841461	2327849	0.66	0.92	0.7
TRUE	Empty	TGGT1_230160-t26_1-p1 | transcript=TGGT1_230160-t26_1 | gene=TGGT1_230160 | organism=Toxoplasma_gondii_GT1 | gene_product=hypothetical protein | transcript_product=hypothetical protein | location=TGGT1_chrVIII:647435-648305(-) | protein_length=142 | sequence_SO=chromosome | SO=protein_coding | is_pseudo=false	TGGT1_230160-t26_1-p1	16 kDa	0.999737	7	1	2359000	2146493	1251111	0.18	0.76	0.026
TRUE	Empty	TGGT1_288530-t26_1-p1 | transcript=TGGT1_288530-t26_1 | gene=TGGT1_288530 | organism=Toxoplasma_gondii_GT1 | gene_product=NOL1/NOP2/sun family protein | transcript_product=NOL1/NOP2/sun family protein | location=TGGT1_chrIX:2409169-2414972(+) | protein_length=804 | sequence_SO=chromosome | SO=protein_coding | is_pseudo=false	TGGT1_288530-t26_1-p1	88 kDa	0.999718	7	1	701412	1020252	858316	0.74	0.31	0.7
TRUE	Empty	TGGT1_272350-t26_1-p1 | transcript=TGGT1_272350-t26_1 | gene=TGGT1_272350 | organism=Toxoplasma_gondii_GT1 | gene_product=mRNA export protein | transcript_product=mRNA export protein | location=TGGT1_chrVIII:4054234-4060874(-) | protein_length=375 | sequence_SO=chromosome | SO=protein_coding | is_pseudo=false	TGGT1_272350-t26_1-p1	41 kDa	0.999716	7	1	3116442	2864793	3370936	0.15	0.78	0.79
TRUE	Empty	TGGT1_225550-t26_1-p1 | transcript=TGGT1_225550-t26_1 | gene=TGGT1_225550 | organism=Toxoplasma_gondii_GT1 | gene_product=phosphatidylserine decarboxylase | transcript_product=phosphatidylserine decarboxylase | location=TGGT1_chrX:2075581-2079309(+) | protein_length=427 | sequence_SO=chromosome | SO=protein_coding | is_pseudo=false	TGGT1_225550-t26_1-p1	48 kDa	0.99971	7	1	3222338	3826438	3246935	0.28	0.19	0.96
TRUE	Empty	TGGT1_246500-t26_1-p1 | transcript=TGGT1_246500-t26_1 | gene=TGGT1_246500 | organism=Toxoplasma_gondii_GT1 | gene_product=surp module domain-containing protein | transcript_product=surp module domain-containing protein | location=TGGT1_chrXII:2735052-2739526(-) | protein_length=658 | sequence_SO=chromosome | SO=protein_coding | is_pseudo=false	TGGT1_246500-t26_1-p1	72 kDa	0.999702	7	1	4657361	4619730	4913986	0.77	0.97	0.83
TRUE	Empty	TGGT1_202572-t26_1-p1 | transcript=TGGT1_202572-t26_1 | gene=TGGT1_202572 | organism=Toxoplasma_gondii_GT1 | gene_product=ribophorin i protein | transcript_product=ribophorin i protein | location=TGGT1_chrVIIa:3106718-3115241(-) | protein_length=959 | sequence_SO=chromosome | SO=protein_coding | is_pseudo=false	TGGT1_202572-t26_1-p1	106 kDa	0.999687	7	1	1110812	1044004	1352716	0.34	0.77	0.54
TRUE	Empty	TGGT1_266030-t26_1-p1 | transcript=TGGT1_266030-t26_1 | gene=TGGT1_266030 | organism=Toxoplasma_gondii_GT1 | gene_product=putative pre-mRNA splicing factor | transcript_product=putative pre-mRNA splicing factor | location=TGGT1_chrIX:1169984-1171558(-) | protein_length=524 | sequence_SO=chromosome | SO=protein_coding | is_pseudo=false	TGGT1_266030-t26_1-p1	63 kDa	0.99967	7	1	1332190	1172974	1178118	0.99	0.2	0.8
TRUE	Empty	TGGT1_270710-t26_1-p1 | transcript=TGGT1_270710-t26_1 | gene=TGGT1_270710 | organism=Toxoplasma_gondii_GT1 | gene_product=WW domain binding protein 11 | transcript_product=WW domain binding protein 11 | location=TGGT1_chrVIII:5054929-5061212(-) | protein_length=561 | sequence_SO=chromosome | SO=protein_coding | is_pseudo=false	TGGT1_270710-t26_1-p1	61 kDa	0.99967	7	1	4465194	4323445	5390575	0.13	0.84	0.34
TRUE	Empty	TGGT1_290030-t26_1-p1 | transcript=TGGT1_290030-t26_1 | gene=TGGT1_290030 | organism=Toxoplasma_gondii_GT1 | gene_product=hypothetical protein | transcript_product=hypothetical protein | location=TGGT1_chrIX:3401903-3405184(-) | protein_length=229 | sequence_SO=chromosome | SO=protein_coding | is_pseudo=false	TGGT1_290030-t26_1-p1	27 kDa	0.999659	7	1	4434074	5045195	3785657	0.026	0.1	0.052
TRUE	Empty	TGGT1_277080-t26_1-p1 | transcript=TGGT1_277080-t26_1 | gene=TGGT1_277080 | organism=Toxoplasma_gondii_GT1 | gene_product=microneme protein MIC5 | transcript_product=microneme protein MIC5 | location=TGGT1_chrXII:6631512-6633486(-) | protein_length=181 | sequence_SO=chromosome | SO=protein_coding | is_pseudo=false	TGGT1_277080-t26_1-p1	20 kDa	0.999653	5	1	5909466	6397324	4947155	0.36	0.6	0.52
TRUE	Empty	TGGT1_222410-t26_1-p1 | transcript=TGGT1_222410-t26_1 | gene=TGGT1_222410 | organism=Toxoplasma_gondii_GT1 | gene_product=hypothetical protein | transcript_product=hypothetical protein | location=TGGT1_chrII:1104474-1114491(+) | protein_length=709 | sequence_SO=chromosome | SO=protein_coding | is_pseudo=false	TGGT1_222410-t26_1-p1	77 kDa	0.999647	7	1	6951205	7158329	7318721	0.88	0.84	0.77
TRUE	Empty	TGGT1_222000-t26_1-p1 | transcript=TGGT1_222000-t26_1 | gene=TGGT1_222000 | organism=Toxoplasma_gondii_GT1 | gene_product=brix domain-containing protein | transcript_product=brix domain-containing protein | location=TGGT1_chrII:726106-731963(-) | protein_length=508 | sequence_SO=chromosome | SO=protein_coding | is_pseudo=false	TGGT1_222000-t26_1-p1	57 kDa	0.999645	7	1	1665385	1962023	1461538	0.62	0.73	0.83
TRUE	Empty	TGGT1_288030-t26_1-p1 | transcript=TGGT1_288030-t26_1 | gene=TGGT1_288030 | organism=Toxoplasma_gondii_GT1 | gene_product=hypothetical protein | transcript_product=hypothetical protein | location=TGGT1_chrIX:2120186-2121400(+) | protein_length=404 | sequence_SO=chromosome | SO=protein_coding | is_pseudo=false	TGGT1_288030-t26_1-p1	43 kDa	0.999607	7	1	2261062	2254436	2451452	0.036	0.97	0.38
TRUE	Empty	TGGT1_236540-t26_1-p1 | transcript=TGGT1_236540-t26_1 | gene=TGGT1_236540 | organism=Toxoplasma_gondii_GT1 | gene_product=RNA recognition motif-containing protein | transcript_product=RNA recognition motif-containing protein | location=TGGT1_chrX:5301444-5305442(+) | protein_length=508 | sequence_SO=chromosome | SO=protein_coding | is_pseudo=false	TGGT1_236540-t26_1-p1	53 kDa	0.999596	7	1	6044417	6625854	6507992	0.9	0.65	0.76
TRUE	Empty	TGGT1_306030-t26_1-p1 | transcript=TGGT1_306030-t26_1 | gene=TGGT1_306030 | organism=Toxoplasma_gondii_GT1 | gene_product=glutathione s-transferase, n-terminal domain containing protein | transcript_product=glutathione s-transferase, n-terminal domain containing protein | location=TGGT1_chrIX:5538577-5544690(-) | protein_length=333 | sequence_SO=chromosome | SO=protein_coding | is_pseudo=false	TGGT1_306030-t26_1-p1	38 kDa	0.999584	7	1	6909006	5536333	6116679	0.12	0.22	0.45
TRUE	Empty	TGGT1_264450-t26_1-p1 | transcript=TGGT1_264450-t26_1 | gene=TGGT1_264450 | organism=Toxoplasma_gondii_GT1 | gene_product=putative DNA topoisomerase III beta-1 | transcript_product=putative DNA topoisomerase III beta-1 | location=TGGT1_chrIX:2040112-2057666(+) | protein_length=852 | sequence_SO=chromosome | SO=protein_coding | is_pseudo=false	TGGT1_264450-t26_1-p1	95 kDa	0.999541	7	1	338320	367252	398568	0.87	0.76	0.73
TRUE	Empty	TGGT1_318730-t26_1-p1 | transcript=TGGT1_318730-t26_1 | gene=TGGT1_318730 | organism=Toxoplasma_gondii_GT1 | gene_product=glycosyl transferase | transcript_product=glycosyl transferase | location=TGGT1_chrIV:1057283-1060758(-) | protein_length=635 | sequence_SO=chromosome | SO=protein_coding | is_pseudo=false	TGGT1_318730-t26_1-p1	71 kDa	0.999535	7	1	3223272	3035300	3202350	0.85	0.83	0.98
TRUE	Empty	TGGT1_293320-t26_1-p1 | transcript=TGGT1_293320-t26_1 | gene=TGGT1_293320 | organism=Toxoplasma_gondii_GT1 | gene_product=hypothetical protein | transcript_product=hypothetical protein | location=TGGT1_chrIa:232486-245499(+) | protein_length=1860 | sequence_SO=chromosome | SO=protein_coding | is_pseudo=false	TGGT1_293320-t26_1-p1	198 kDa	0.999515	7	1	373247	381432	463498	0.65	0.38	0.61
TRUE	Empty	TGGT1_214940-t26_1-p1 | transcript=TGGT1_214940-t26_1 | gene=TGGT1_214940 | organism=Toxoplasma_gondii_GT1 | gene_product=MIC2-associated protein M2AP | transcript_product=MIC2-associated protein M2AP | location=TGGT1_chrX:6494811-6496996(+) | protein_length=330 | sequence_SO=chromosome | SO=protein_coding | is_pseudo=false	TGGT1_214940-t26_1-p1	35 kDa	0.999458	7	1	13471830	14939990	10745320	0.15	0.51	0.23
TRUE	Empty	TGGT1_260520-t26_1-p1 | transcript=TGGT1_260520-t26_1 | gene=TGGT1_260520 | organism=Toxoplasma_gondii_GT1 | gene_product=hypothetical protein | transcript_product=hypothetical protein | location=TGGT1_chrVIIb:2164696-2167131(-) | protein_length=742 | sequence_SO=chromosome | SO=protein_coding | is_pseudo=false	TGGT1_260520-t26_1-p1	77 kDa	0.999446	7	1	1137353	1580958	1471239	0.94	0.56	0.73
TRUE	Empty	TGGT1_310130-t26_1-p1 | transcript=TGGT1_310130-t26_1 | gene=TGGT1_310130 | organism=Toxoplasma_gondii_GT1 | gene_product=Spc97 / Spc98 family protein | transcript_product=Spc97 / Spc98 family protein | location=TGGT1_chrXI:1032616-1044829(-) | protein_length=1427 | sequence_SO=chromosome | SO=protein_coding | is_pseudo=false	TGGT1_310130-t26_1-p1	156 kDa	0.99943	7	1	1168586	859625	1494657	0.065	0.25	0.19
TRUE	Empty	TGGT1_232410-t26_1-p1 | transcript=TGGT1_232410-t26_1 | gene=TGGT1_232410 | organism=Toxoplasma_gondii_GT1 | gene_product=PDI family protein | transcript_product=PDI family protein | location=TGGT1_chrVIII:2074655-2076392(-) | protein_length=220 | sequence_SO=chromosome | SO=protein_coding | is_pseudo=false	TGGT1_232410-t26_1-p1	25 kDa	0.99942	7	1	13241970	11907940	9237029	0.29	0.54	0.14
TRUE	Empty	TGGT1_290660-t26_1-p1 | transcript=TGGT1_290660-t26_1 | gene=TGGT1_290660 | organism=Toxoplasma_gondii_GT1 | gene_product=RNA recognition motif-containing protein | transcript_product=RNA recognition motif-containing protein | location=TGGT1_chrIX:3628759-3632147(-) | protein_length=446 | sequence_SO=chromosome | SO=protein_coding | is_pseudo=false	TGGT1_290660-t26_1-p1	48 kDa	0.999401	7	1	2396085	2762858	2404704	0.69	0.56	0.99
TRUE	Empty	TGGT1_221230-t26_1-p1 | transcript=TGGT1_221230-t26_1 | gene=TGGT1_221230 | organism=Toxoplasma_gondii_GT1 | gene_product=hypothetical protein | transcript_product=hypothetical protein | location=TGGT1_chrII:144610-150096(-) | protein_length=574 | sequence_SO=chromosome | SO=protein_coding | is_pseudo=false	TGGT1_221230-t26_1-p1	62 kDa	0.999389	7	1	904971	987730	1763026	0.0077	0.59	0.035
TRUE	Empty	TGGT1_216680-t26_1-p1 | transcript=TGGT1_216680-t26_1 | gene=TGGT1_216680 | organism=Toxoplasma_gondii_GT1 | gene_product=ankyrin repeat-containing protein | transcript_product=ankyrin repeat-containing protein | location=TGGT1_chrXI:5876765-5888176(+) | protein_length=397 | sequence_SO=chromosome | SO=protein_coding | is_pseudo=false	TGGT1_216680-t26_1-p1	45 kDa	0.999381	7	1	8026527	8019673	9332323	0.26	0.99	0.36
TRUE	Empty	TGGT1_223940-t26_1-p1 | transcript=TGGT1_223940-t26_1 | gene=TGGT1_223940 | organism=Toxoplasma_gondii_GT1 | gene_product=GAP45 protein | transcript_product=GAP45 protein | location=TGGT1_chrX:3344621-3345358(-) | protein_length=245 | sequence_SO=chromosome | SO=protein_coding | is_pseudo=false	TGGT1_223940-t26_1-p1	27 kDa	0.999358	6	1	10285050	13532650	12702950	0.32	0.37	0.47
TRUE	Empty	TGGT1_218600-t26_1-p1 | transcript=TGGT1_218600-t26_1 | gene=TGGT1_218600 | organism=Toxoplasma_gondii_GT1 | gene_product=RNA recognition motif-containing protein | transcript_product=RNA recognition motif-containing protein | location=TGGT1_chrXII:1316835-1323130(+) | protein_length=752 | sequence_SO=chromosome | SO=protein_coding | is_pseudo=false	TGGT1_218600-t26_1-p1	84 kDa	0.999358	7	1	98411.1	239727	227661	0.88	0.51	0.54
TRUE	Empty	TGGT1_226680-t26_1-p1 | transcript=TGGT1_226680-t26_1 | gene=TGGT1_226680 | organism=Toxoplasma_gondii_GT1 | gene_product=hypothetical protein | transcript_product=hypothetical protein | location=TGGT1_chrX:1350715-1356291(-) | protein_length=899 | sequence_SO=chromosome | SO=protein_coding | is_pseudo=false	TGGT1_226680-t26_1-p1	98 kDa	0.999348	7	1	1518434	2149929	1755707	0.24	0.38	0.7
TRUE	Empty	TGGT1_270010-t26_1-p1 | transcript=TGGT1_270010-t26_1 | gene=TGGT1_270010 | organism=Toxoplasma_gondii_GT1 | gene_product=hypothetical protein | transcript_product=hypothetical protein | location=TGGT1_chrVIII:5449261-5457417(-) | protein_length=556 | sequence_SO=chromosome | SO=protein_coding | is_pseudo=false	TGGT1_270010-t26_1-p1	59 kDa	0.99931	7	1	7959531	6598781	8678508	0.36	0.41	0.74
TRUE	Empty	TGGT1_243690-t26_1-p1 | transcript=TGGT1_243690-t26_1 | gene=TGGT1_243690 | organism=Toxoplasma_gondii_GT1 | gene_product=hypothetical protein | transcript_product=hypothetical protein | location=TGGT1_chrVI:2711088-2713151(-) | protein_length=410 | sequence_SO=chromosome | SO=protein_coding | is_pseudo=false	TGGT1_243690-t26_1-p1	45 kDa	0.999302	7	1	1506167	1643800	1086581	0.39	0.66	0.46
TRUE	Empty	TGGT1_295040-t26_1-p1 | transcript=TGGT1_295040-t26_1 | gene=TGGT1_295040 | organism=Toxoplasma_gondii_GT1 | gene_product=HEAT repeat-containing protein | transcript_product=HEAT repeat-containing protein | location=TGGT1_chrIa:1332125-1343550(-) | protein_length=971 | sequence_SO=chromosome | SO=protein_coding | is_pseudo=false	TGGT1_295040-t26_1-p1	105 kDa	0.999266	7	1	1466953	1635651	1787813	0.34	0.68	0.48
TRUE	Empty	TGGT1_220900-t26_1-p1 | transcript=TGGT1_220900-t26_1 | gene=TGGT1_220900 | organism=Toxoplasma_gondii_GT1 | gene_product=hypothetical protein | transcript_product=hypothetical protein | location=TGGT1_chrII:27409-29529(+) | protein_length=706 | sequence_SO=chromosome | SO=protein_coding | is_pseudo=false	TGGT1_220900-t26_1-p1	78 kDa	0.999257	7	1	1611600	1720863	1879980	0.71	0.59	0.57
TRUE	Empty	TGGT1_284540-t26_1-p1 | transcript=TGGT1_284540-t26_1 | gene=TGGT1_284540 | organism=Toxoplasma_gondii_GT1 | gene_product=ATP synthase F1, delta subunit protein | transcript_product=ATP synthase F1, delta subunit protein | location=TGGT1_chrV:2579034-2580826(-) | protein_length=252 | sequence_SO=chromosome | SO=protein_coding | is_pseudo=false	TGGT1_284540-t26_1-p1	28 kDa	0.999242	7	1	5254230	5532080	4619441	0.68	0.86	0.74
TRUE	Empty	TGGT1_204530-t26_1-p1 | transcript=TGGT1_204530-t26_1 | gene=TGGT1_204530 | organism=Toxoplasma_gondii_GT1 | gene_product=microneme protein MIC11 | transcript_product=microneme protein MIC11 | location=TGGT1_chrVIIa:1632334-1633282(-) | protein_length=204 | sequence_SO=chromosome | SO=protein_coding | is_pseudo=false	TGGT1_204530-t26_1-p1	22 kDa	0.999234	7	1	29785420	36047980	29249460	0.023	0.18	0.87
TRUE	Empty	TGGT1_286600-t26_1-p1 | transcript=TGGT1_286600-t26_1 | gene=TGGT1_286600 | organism=Toxoplasma_gondii_GT1 | gene_product=hypothetical protein | transcript_product=hypothetical protein | location=TGGT1_chrV:1621096-1622773(-) | protein_length=388 | sequence_SO=chromosome | SO=protein_coding | is_pseudo=false	TGGT1_286600-t26_1-p1	43 kDa	0.99923	7	1	1464790	1525838	1293967	0.4	0.75	0.39
TRUE	Empty	TGGT1_318260-t26_1-p1 | transcript=TGGT1_318260-t26_1 | gene=TGGT1_318260 | organism=Toxoplasma_gondii_GT1 | gene_product=transcription initiation factor TFIID subunit TAF5 | transcript_product=transcription initiation factor TFIID subunit TAF5 | location=TGGT1_chrIV:1391094-1399749(-) | protein_length=1094 | sequence_SO=chromosome | SO=protein_coding | is_pseudo=false	TGGT1_318260-t26_1-p1	118 kDa	0.999198	7	1	1262789	993347	1026223	0.71	0.079	0.09
TRUE	Empty	TGGT1_318410-t26_1-p1 | transcript=TGGT1_318410-t26_1 | gene=TGGT1_318410 | organism=Toxoplasma_gondii_GT1 | gene_product=putative TCP-1 chaperonin | transcript_product=putative TCP-1 chaperonin | location=TGGT1_chrIV:1295296-1300413(+) | protein_length=537 | sequence_SO=chromosome | SO=protein_coding | is_pseudo=false	TGGT1_318410-t26_1-p1	59 kDa	0.999197	7	1	708617	609908	558026	0.64	0.46	0.0041
TRUE	Empty	TGGT1_287270-t26_1-p1 | transcript=TGGT1_287270-t26_1 | gene=TGGT1_287270 | organism=Toxoplasma_gondii_GT1 | gene_product=hypothetical protein | transcript_product=hypothetical protein | location=TGGT1_chrV:1342040-1344154(+) | protein_length=704 | sequence_SO=chromosome | SO=protein_coding | is_pseudo=false	TGGT1_287270-t26_1-p1	75 kDa	0.999196	7	1	2291427	2082168	2166850	0.78	0.56	0.71
TRUE	Empty	TGGT1_225870-t26_1-p1 | transcript=TGGT1_225870-t26_1 | gene=TGGT1_225870 | organism=Toxoplasma_gondii_GT1 | gene_product=hypothetical protein | transcript_product=hypothetical protein | location=TGGT1_chrX:1888092-1892831(+) | protein_length=1579 | sequence_SO=chromosome | SO=protein_coding | is_pseudo=false	TGGT1_225870-t26_1-p1	161 kDa	0.999165	7	1	1236295	1120023	1114319	0.98	0.61	0.62
TRUE	Empty	TGGT1_246550-t26_1-p1 | transcript=TGGT1_246550-t26_1 | gene=TGGT1_246550 | organism=Toxoplasma_gondii_GT1 | gene_product=aspartyl protease ASP3 | transcript_product=aspartyl protease ASP3 | location=TGGT1_chrXII:2777006-2782288(+) | protein_length=643 | sequence_SO=chromosome | SO=protein_coding | is_pseudo=false	TGGT1_246550-t26_1-p1	69 kDa	0.999112	7	1	2566565	2903852	2192324	0.16	0.23	0.33
TRUE	Empty	TGGT1_313440-t26_1-p1 | transcript=TGGT1_313440-t26_1 | gene=TGGT1_313440 | organism=Toxoplasma_gondii_GT1 | gene_product=hypothetical protein | transcript_product=hypothetical protein | location=TGGT1_chrXI:3358899-3359828(-) | protein_length=309 | sequence_SO=chromosome | SO=protein_coding | is_pseudo=false	TGGT1_313440-t26_1-p1	35 kDa	0.9991	7	1	2694393	2414233	2161480	0.45	0.16	0.22
TRUE	Empty	TGGT1_257340-t26_1-p1 | transcript=TGGT1_257340-t26_1 | gene=TGGT1_257340 | organism=Toxoplasma_gondii_GT1 | gene_product=Ras family protein | transcript_product=Ras family protein | location=TGGT1_chrVIIb:4052097-4056284(+) | protein_length=214 | sequence_SO=chromosome | SO=protein_coding | is_pseudo=false	TGGT1_257340-t26_1-p1	24 kDa	0.999014	7	0.86	2025436	2174195	1786838	0.15	0.45	0.39
TRUE	Empty	TGGT1_219550-t26_1-p1 | transcript=TGGT1_219550-t26_1 | gene=TGGT1_219550 | organism=Toxoplasma_gondii_GT1 | gene_product=dihydrolipoyllysine-residue succinyltransferase component of oxoglutarate dehydrogenase | transcript_product=dihydrolipoyllysine-residue succinyltransferase component of oxoglutarate dehydrogenase | location=TGGT1_chrXII:790088-797741(-) | protein_length=470 | sequence_SO=chro…	TGGT1_219550-t26_1-p1	50 kDa	0.998983	7	1	8817489	11611350	9909817	0.0031	0.27	0.59
TRUE	Empty	TGGT1_290980-t26_1-p1 | transcript=TGGT1_290980-t26_1 | gene=TGGT1_290980 | organism=Toxoplasma_gondii_GT1 | gene_product=putative glycine C-acetyltransferase | transcript_product=putative glycine C-acetyltransferase | location=TGGT1_chrIX:3815266-3817238(-) | protein_length=571 | sequence_SO=chromosome | SO=protein_coding | is_pseudo=false	TGGT1_290980-t26_1-p1	64 kDa	0.998949	7	0.86	2214739	2408985	2412142	0.99	0.68	0.66
TRUE	Empty	TGGT1_207440-t26_1-p1 | transcript=TGGT1_207440-t26_1 | gene=TGGT1_207440 | organism=Toxoplasma_gondii_GT1 | gene_product=ribosomal protein RPS4 | transcript_product=ribosomal protein RPS4 | location=TGGT1_chrIb:77395-80548(-) | protein_length=312 | sequence_SO=chromosome | SO=protein_coding | is_pseudo=false	TGGT1_207440-t26_1-p1	36 kDa	0.998919	6	1	17325740	18987740	20188000	0.78	0.43	0.49
TRUE	Empty	TGGT1_290840-t26_1-p1 | transcript=TGGT1_290840-t26_1 | gene=TGGT1_290840 | organism=Toxoplasma_gondii_GT1 | gene_product=serine protease | transcript_product=serine protease | location=TGGT1_chrIX:3686216-3692475(+) | protein_length=960 | sequence_SO=chromosome | SO=protein_coding | is_pseudo=false	TGGT1_290840-t26_1-p1	103 kDa	0.998842	7	1	2388867	2757654	2432509	0.29	0.21	0.89
TRUE	Empty	TGGT1_253090-t26_1-p1 | transcript=TGGT1_253090-t26_1 | gene=TGGT1_253090 | organism=Toxoplasma_gondii_GT1 | gene_product=DEAD/DEAH box helicase domain-containing protein | transcript_product=DEAD/DEAH box helicase domain-containing protein | location=TGGT1_chrIII:713146-720750(+) | protein_length=655 | sequence_SO=chromosome | SO=protein_coding | is_pseudo=false	TGGT1_253090-t26_1-p1	72 kDa	0.9988	7	1	3485461	3218152	3428892	0.74	0.59	0.93
TRUE	Empty	TGGT1_271060-t26_1-p1 | transcript=TGGT1_271060-t26_1 | gene=TGGT1_271060 | organism=Toxoplasma_gondii_GT1 | gene_product=Sec1 family protein | transcript_product=Sec1 family protein | location=TGGT1_chrVIII:4742620-4749771(-) | protein_length=648 | sequence_SO=chromosome | SO=protein_coding | is_pseudo=false	TGGT1_271060-t26_1-p1	73 kDa	0.998797	7	1	2354316	2236640	2677792	0.68	0.89	0.76
TRUE	Empty	TGGT1_231600-t26_1-p1 | transcript=TGGT1_231600-t26_1 | gene=TGGT1_231600 | organism=Toxoplasma_gondii_GT1 | gene_product=HEAT repeat-containing protein | transcript_product=HEAT repeat-containing protein | location=TGGT1_chrVIII:1475035-1486295(-) | protein_length=1169 | sequence_SO=chromosome | SO=protein_coding | is_pseudo=false	TGGT1_231600-t26_1-p1	128 kDa	0.998742	7	1	1844018	1604044	1679740	0.8	0.27	0.58
TRUE	Empty	TGGT1_295680-t26_1-p1 | transcript=TGGT1_295680-t26_1 | gene=TGGT1_295680 | organism=Toxoplasma_gondii_GT1 | gene_product=putative periodic tryptophan protein PWP2 | transcript_product=putative periodic tryptophan protein PWP2 | location=TGGT1_chrIa:1595494-1604605(-) | protein_length=1266 | sequence_SO=chromosome | SO=protein_coding | is_pseudo=false	TGGT1_295680-t26_1-p1	137 kDa	0.998706	7	1	1163113	1408234	1546182	0.78	0.2	0.42
TRUE	Empty	TGGT1_207990-t26_1-p1 | transcript=TGGT1_207990-t26_1 | gene=TGGT1_207990 | organism=Toxoplasma_gondii_GT1 | gene_product=ribosomal RNA large subunit methyltransferase J protein | transcript_product=ribosomal RNA large subunit methyltransferase J protein | location=TGGT1_chrIb:515897-524572(-) | protein_length=981 | sequence_SO=chromosome | SO=protein_coding | is_pseudo=false	TGGT1_207990-t26_1-p1	109 kDa	0.998698	7	1	278002	379911	257521	0.34	0.048	0.83
TRUE	Empty	TGGT1_229750-t26_1-p1 | transcript=TGGT1_229750-t26_1 | gene=TGGT1_229750 | organism=Toxoplasma_gondii_GT1 | gene_product=hypothetical protein | transcript_product=hypothetical protein | location=TGGT1_chrVIII:414321-424829(-) | protein_length=1358 | sequence_SO=chromosome | SO=protein_coding | is_pseudo=false	TGGT1_229750-t26_1-p1	146 kDa	0.998667	7	1	782402	415854	963846	0.43	0.33	0.85
TRUE	Empty	TGGT1_237180-t26_1-p1 | transcript=TGGT1_237180-t26_1 | gene=TGGT1_237180 | organism=Toxoplasma_gondii_GT1 | gene_product=hypothetical protein | transcript_product=hypothetical protein | location=TGGT1_chrX:5659103-5659870(-) | protein_length=255 | sequence_SO=chromosome | SO=protein_coding | is_pseudo=false	TGGT1_237180-t26_1-p1	29 kDa	0.99864	7	1	7295070	7523047	5870722	0.00045	0.14	0.003
TRUE	Empty	TGGT1_226860-t26_1-p1 | transcript=TGGT1_226860-t26_1 | gene=TGGT1_226860 | organism=Toxoplasma_gondii_GT1 | gene_product=SAG-related sequence SRS67 | transcript_product=SAG-related sequence SRS67 | location=TGGT1_chrX:1192695-1193327(-) | protein_length=210 | sequence_SO=chromosome | SO=protein_coding | is_pseudo=false	TGGT1_226860-t26_1-p1	23 kDa	0.998637	7	1	10056860	10198410	8173191	0.14	0.9	0.25
TRUE	Empty	TGGT1_304955-t26_1-p1 | transcript=TGGT1_304955-t26_1 | gene=TGGT1_304955 | organism=Toxoplasma_gondii_GT1 | gene_product=serine/threonine specific protein phosphatase | transcript_product=serine/threonine specific protein phosphatase | location=TGGT1_chrIX:4886317-4901581(-) | protein_length=2883 | sequence_SO=chromosome | SO=protein_coding | is_pseudo=false	TGGT1_304955-t26_1-p1	304 kDa	0.998531	7	1	3646949	3400381	3766808	0.22	0.094	0.66
TRUE	Empty	TGGT1_278960-t26_1-p1 | transcript=TGGT1_278960-t26_1 | gene=TGGT1_278960 | organism=Toxoplasma_gondii_GT1 | gene_product=hypothetical protein | transcript_product=hypothetical protein | location=TGGT1_chrXII:5640758-5643155(-) | protein_length=537 | sequence_SO=chromosome | SO=protein_coding | is_pseudo=false	TGGT1_278960-t26_1-p1	58 kDa	0.998528	7	1	1426853	1156259	1499394	0.15	0.15	0.76
TRUE	Empty	TGGT1_209910-t26_1-p1 | transcript=TGGT1_209910-t26_1 | gene=TGGT1_209910 | organism=Toxoplasma_gondii_GT1 | gene_product=histone H2Bv | transcript_product=histone H2Bv | location=TGGT1_chrIb:1562803-1563174(+) | protein_length=123 | sequence_SO=chromosome | SO=protein_coding | is_pseudo=false	TGGT1_209910-t26_1-p1	14 kDa	0.998464	5	1	282499900	266373700	318661300	0.57	0.88	0.79
TRUE	Empty	TGGT1_238880-t26_1-p1 | transcript=TGGT1_238880-t26_1 | gene=TGGT1_238880 | organism=Toxoplasma_gondii_GT1 | gene_product=hypothetical protein | transcript_product=hypothetical protein | location=TGGT1_chrVI:276222-291010(+) | protein_length=3152 | sequence_SO=chromosome | SO=protein_coding | is_pseudo=false	TGGT1_238880-t26_1-p1	343 kDa	0.998432	7	1	460288	450668	551892	0.7	0.92	0.72
TRUE	Empty	TGGT1_208970-t26_1-p1 | transcript=TGGT1_208970-t26_1 | gene=TGGT1_208970 | organism=Toxoplasma_gondii_GT1 | gene_product=RNA recognition motif-containing protein | transcript_product=RNA recognition motif-containing protein | location=TGGT1_chrIb:942283-944701(-) | protein_length=283 | sequence_SO=chromosome | SO=protein_coding | is_pseudo=false	TGGT1_208970-t26_1-p1	34 kDa	0.998405	6	1	3524664	3558326	4097075	0.73	0.98	0.59
TRUE	Empty	TGGT1_217050-t26_1-p1 | transcript=TGGT1_217050-t26_1 | gene=TGGT1_217050 | organism=Toxoplasma_gondii_GT1 | gene_product=ADA2-A transcriptional co-activator SAGA component | transcript_product=ADA2-A transcriptional co-activator SAGA component | location=TGGT1_chrXI:5621435-5629631(+) | protein_length=1212 | sequence_SO=chromosome | SO=protein_coding | is_pseudo=false	TGGT1_217050-t26_1-p1	127 kDa	0.998379	7	1	974552	910750	1060903	0.61	0.83	0.84
TRUE	Empty	TGGT1_273540-t26_1-p1 | transcript=TGGT1_273540-t26_1 | gene=TGGT1_273540 | organism=Toxoplasma_gondii_GT1 | gene_product=putative phosphatidylserine synthase | transcript_product=putative phosphatidylserine synthase | location=TGGT1_chrVIII:3409334-3411178(+) | protein_length=614 | sequence_SO=chromosome | SO=protein_coding | is_pseudo=false	TGGT1_273540-t26_1-p1	68 kDa	0.998163	7	1	1404192	1130958	1315558	0.21	0.092	0.61
TRUE	Empty	TGGT1_255320-t26_1-p1 | transcript=TGGT1_255320-t26_1 | gene=TGGT1_255320 | organism=Toxoplasma_gondii_GT1 | gene_product=mRNA turnover 4 (MRT4) family protein | transcript_product=mRNA turnover 4 (MRT4) family protein | location=TGGT1_chrVIIb:4809517-4812021(-) | protein_length=228 | sequence_SO=chromosome | SO=protein_coding | is_pseudo=false	TGGT1_255320-t26_1-p1	26 kDa	0.998143	7	1	13939620	15664110	17706910	0.1	0.65	0.38
TRUE	Empty	TGGT1_275568-t26_1-p1 | transcript=TGGT1_275568-t26_1 | gene=TGGT1_275568 | organism=Toxoplasma_gondii_GT1 | gene_product=GPI transamidase subunit PIG-U protein | transcript_product=GPI transamidase subunit PIG-U protein | location=TGGT1_chrXII:6505394-6511917(-) | protein_length=548 | sequence_SO=chromosome | SO=protein_coding | is_pseudo=false	TGGT1_275568-t26_1-p1	61 kDa	0.998106	7	1	3317720	3126899	3445252	0.19	0.71	0.82
TRUE	Empty	TGGT1_273920-t26_1-p1 | transcript=TGGT1_273920-t26_1 | gene=TGGT1_273920 | organism=Toxoplasma_gondii_GT1 | gene_product=putative aldose reductase | transcript_product=putative aldose reductase | location=TGGT1_chrVIII:3169259-3173466(+) | protein_length=537 | sequence_SO=chromosome | SO=protein_coding | is_pseudo=false	TGGT1_273920-t26_1-p1	59 kDa	0.998028	7	1	4433519	3318109	4183870	0.61	0.24	0.88
TRUE	Empty	TGGT1_209600-t26_1-p1 | transcript=TGGT1_209600-t26_1 | gene=TGGT1_209600 | organism=Toxoplasma_gondii_GT1 | gene_product=hypothetical protein | transcript_product=hypothetical protein | location=TGGT1_chrIb:1372263-1374087(-) | protein_length=451 | sequence_SO=chromosome | SO=protein_coding | is_pseudo=false	TGGT1_209600-t26_1-p1	50 kDa	0.997989	7	1	4996607	5216149	3843090	0.17	0.8	0.1
TRUE	Empty	TGGT1_270960-t26_1-p1 | transcript=TGGT1_270960-t26_1 | gene=TGGT1_270960 | organism=Toxoplasma_gondii_GT1 | gene_product=hypothetical protein | transcript_product=hypothetical protein | location=TGGT1_chrVIII:4830509-4837142(+) | protein_length=1243 | sequence_SO=chromosome | SO=protein_coding | is_pseudo=false	TGGT1_270960-t26_1-p1	139 kDa	0.997967	7	1	1508221	1367367	1394433	0.94	0.59	0.79
TRUE	Empty	TGGT1_216080-t26_1-p1 | transcript=TGGT1_216080-t26_1 | gene=TGGT1_216080 | organism=Toxoplasma_gondii_GT1 | gene_product=apical complex lysine methyltransferase | transcript_product=apical complex lysine methyltransferase | location=TGGT1_chrXI:6322234-6324708(-) | protein_length=709 | sequence_SO=chromosome | SO=protein_coding | is_pseudo=false	TGGT1_216080-t26_1-p1	79 kDa	0.997869	7	1	2602376	1600726	1631250	0.99	0.44	0.6
TRUE	Empty	TGGT1_293510-t26_1-p1 | transcript=TGGT1_293510-t26_1 | gene=TGGT1_293510 | organism=Toxoplasma_gondii_GT1 | gene_product=poly(ADP-ribose) polymerase and DNA-Ligase Zn-finger region domain-containing protein | transcript_product=poly(ADP-ribose) polymerase and DNA-Ligase Zn-finger region domain-containing protein | location=TGGT1_chrIa:371571-373049(-) | protein_length=392 | sequence_SO=chromosom…	TGGT1_293510-t26_1-p1	44 kDa	0.997802	7	1	5266301	3995886	5324306	0.49	0.12	0.98
TRUE	Empty	TGGT1_213030-t26_1-p1 | transcript=TGGT1_213030-t26_1 | gene=TGGT1_213030 | organism=Toxoplasma_gondii_GT1 | gene_product=hypothetical protein | transcript_product=hypothetical protein | location=TGGT1_chrV:673145-674534(+) | protein_length=324 | sequence_SO=chromosome | SO=protein_coding | is_pseudo=false	TGGT1_213030-t26_1-p1	35 kDa	0.997715	7	1	903618	1355905	965402	0.17	0.25	0.83
TRUE	Empty	TGGT1_310460-t26_1-p1 | transcript=TGGT1_310460-t26_1 | gene=TGGT1_310460 | organism=Toxoplasma_gondii_GT1 | gene_product=Rab6 | transcript_product=Rab6 | location=TGGT1_chrXI:1331540-1336504(+) | protein_length=209 | sequence_SO=chromosome | SO=protein_coding | is_pseudo=false	TGGT1_310460-t26_1-p1	23 kDa	0.9977	7	0.86	2899020	3215023	3507442	0.5	0.47	0.33
TRUE	Empty	TGGT1_231210-t26_1-p1 | transcript=TGGT1_231210-t26_1 | gene=TGGT1_231210 | organism=Toxoplasma_gondii_GT1 | gene_product=sarcalumenin/eps15 family protein | transcript_product=sarcalumenin/eps15 family protein | location=TGGT1_chrVIII:1323693-1330562(-) | protein_length=594 | sequence_SO=chromosome | SO=protein_coding | is_pseudo=false	TGGT1_231210-t26_1-p1	67 kDa	0.997597	7	1	319687	235522	212391	0.15	0.081	0.053
TRUE	Empty	TGGT1_288630-t26_1-p1 | transcript=TGGT1_288630-t26_1 | gene=TGGT1_288630 | organism=Toxoplasma_gondii_GT1 | gene_product=putative nucleosome assembly protein (NAP) | transcript_product=putative nucleosome assembly protein (NAP) | location=TGGT1_chrIX:2455396-2456752(+) | protein_length=281 | sequence_SO=chromosome | SO=protein_coding | is_pseudo=false	TGGT1_288630-t26_1-p1	32 kDa	0.997588	7	1	2758408	3222568	3385141	0.19	0.61	0.52
TRUE	Empty	TGGT1_273120-t26_1-p1 | transcript=TGGT1_273120-t26_1 | gene=TGGT1_273120 | organism=Toxoplasma_gondii_GT1 | gene_product=SAG-related sequence SRS30C | transcript_product=SAG-related sequence SRS30C | location=TGGT1_chrVIII:3643884-3645008(-) | protein_length=374 | sequence_SO=chromosome | SO=protein_coding | is_pseudo=false	TGGT1_273120-t26_1-p1	40 kDa	0.997308	7	0.86	552090	370191	431417	0.58	0.069	0.37
TRUE	Empty	TGGT1_301120-t26_1-p1 | transcript=TGGT1_301120-t26_1 | gene=TGGT1_301120 | organism=Toxoplasma_gondii_GT1 | gene_product=acetyl-CoA acetyltransferase | transcript_product=acetyl-CoA acetyltransferase | location=TGGT1_chrIV:2160787-2165762(-) | protein_length=413 | sequence_SO=chromosome | SO=protein_coding | is_pseudo=false	TGGT1_301120-t26_1-p1	44 kDa	0.997174	7	1	2207936	2724148	1883128	0.064	0.29	0.41
TRUE	Empty	TGGT1_289690-t26_1-p1 | transcript=TGGT1_289690-t26_1 | gene=TGGT1_289690 | organism=Toxoplasma_gondii_GT1 | gene_product=glyceraldehyde-3-phosphate dehydrogenase GAPDH1 | transcript_product=glyceraldehyde-3-phosphate dehydrogenase GAPDH1 | location=TGGT1_chrIX:3189155-3191218(-) | protein_length=489 | sequence_SO=chromosome | SO=protein_coding | is_pseudo=false	TGGT1_289690-t26_1-p1	53 kDa	0.99717	7	1	1845543	2020106	1692118	0.6	0.82	0.76
TRUE	Empty	TGGT1_212260-t26_1-p1 | transcript=TGGT1_212260-t26_1 | gene=TGGT1_212260 | organism=Toxoplasma_gondii_GT1 | gene_product=Sjogren's syndrome/scleroderma autoantigen 1 (Autoantigen p27) protein | transcript_product=Sjogren's syndrome/scleroderma autoantigen 1 (Autoantigen p27) protein | location=TGGT1_chrX:3858396-3862236(-) | protein_length=351 | sequence_SO=chromosome | SO=protein_coding | is_ps…	TGGT1_212260-t26_1-p1	38 kDa	0.997167	7	1	2160770	1633003	2296252	0.42	0.076	0.87
TRUE	Empty	TGGT1_215980-t26_1-p1 | transcript=TGGT1_215980-t26_1 | gene=TGGT1_215980 | organism=Toxoplasma_gondii_GT1 | gene_product=hypothetical protein | transcript_product=hypothetical protein | location=TGGT1_chrXI:6414554-6415186(+) | protein_length=210 | sequence_SO=chromosome | SO=protein_coding | is_pseudo=false	TGGT1_215980-t26_1-p1	24 kDa	0.99716	7	1	181055000	148738800	166063400	0.41	0.061	0.54
TRUE	Empty	TGGT1_204020-t26_1-p1 | transcript=TGGT1_204020-t26_1 | gene=TGGT1_204020 | organism=Toxoplasma_gondii_GT1 | gene_product=ribosomal protein RPL8 | transcript_product=ribosomal protein RPL8 | location=TGGT1_chrVIIa:1947745-1950214(+) | protein_length=260 | sequence_SO=chromosome | SO=protein_coding | is_pseudo=false	TGGT1_204020-t26_1-p1	28 kDa	0.997147	7	1	11051700	12250200	11698350	0.87	0.45	0.83
TRUE	Empty	TGGT1_299110-t26_1-p1 | transcript=TGGT1_299110-t26_1 | gene=TGGT1_299110 | organism=Toxoplasma_gondii_GT1 | gene_product=cleft lip and palate transmembrane protein 1 (clptm1) protein | transcript_product=cleft lip and palate transmembrane protein 1 (clptm1) protein | location=TGGT1_chrIII:2152699-2160213(+) | protein_length=619 | sequence_SO=chromosome | SO=protein_coding | is_pseudo=false	TGGT1_299110-t26_1-p1	71 kDa	0.99705	7	1	14278050	12519600	14816900	0.24	0.57	0.87
TRUE	Empty	TGGT1_229210-t26_1-p1 | transcript=TGGT1_229210-t26_1 | gene=TGGT1_229210 | organism=Toxoplasma_gondii_GT1 | gene_product=putative small nuclear ribonucleoprotein polypeptide A' | transcript_product=putative small nuclear ribonucleoprotein polypeptide A' | location=TGGT1_chrVIII:92114-95816(-) | protein_length=254 | sequence_SO=chromosome | SO=protein_coding | is_pseudo=false	TGGT1_229210-t26_1-p1	29 kDa	0.996881	7	1	6045008	5927440	6108364	0.89	0.8	0.96
TRUE	Empty	TGGT1_252210-t26_1-p1 | transcript=TGGT1_252210-t26_1 | gene=TGGT1_252210 | organism=Toxoplasma_gondii_GT1 | gene_product=pentatricopeptide repeat domain-containing protein | transcript_product=pentatricopeptide repeat domain-containing protein | location=TGGT1_chrIII:378447-385902(-) | protein_length=1904 | sequence_SO=chromosome | SO=protein_coding | is_pseudo=false	TGGT1_252210-t26_1-p1	201 kDa	0.996862	7	1	1174637	623956	1273414	0.25	0.19	0.89
TRUE	Empty	TGGT1_300280-t26_1-p1 | transcript=TGGT1_300280-t26_1 | gene=TGGT1_300280 | organism=Toxoplasma_gondii_GT1 | gene_product=LSM domain-containing protein | transcript_product=LSM domain-containing protein | location=TGGT1_chrXII:70960-73566(-) | protein_length=169 | sequence_SO=chromosome | SO=protein_coding | is_pseudo=false	TGGT1_300280-t26_1-p1	18 kDa	0.996813	6	1	18987770	20040720	19548730	0.84	0.23	0.8
TRUE	Empty	TGGT1_287500-t26_1-p1 | transcript=TGGT1_287500-t26_1 | gene=TGGT1_287500 | organism=Toxoplasma_gondii_GT1 | gene_product=putative T complex chaperonin | transcript_product=putative T complex chaperonin | location=TGGT1_chrV:438209-443517(-) | protein_length=556 | sequence_SO=chromosome | SO=protein_coding | is_pseudo=false	TGGT1_287500-t26_1-p1	59 kDa	0.996616	7	1	517515	705185	703877	1	0.51	0.06
TRUE	Empty	TGGT1_224720-t26_1-p1 | transcript=TGGT1_224720-t26_1 | gene=TGGT1_224720 | organism=Toxoplasma_gondii_GT1 | gene_product=SPOC domain-containing protein | transcript_product=SPOC domain-containing protein | location=TGGT1_chrX:2763216-2767432(-) | protein_length=704 | sequence_SO=chromosome | SO=protein_coding | is_pseudo=false	TGGT1_224720-t26_1-p1	73 kDa	0.996531	7	1	7144698	7709053	8065122	0.82	0.48	0.52
TRUE	Empty	TGGT1_244000-t26_1-p1 | transcript=TGGT1_244000-t26_1 | gene=TGGT1_244000 | organism=Toxoplasma_gondii_GT1 | gene_product=DEAD/DEAH box helicase domain-containing protein | transcript_product=DEAD/DEAH box helicase domain-containing protein | location=TGGT1_chrVI:2860216-2869406(+) | protein_length=1009 | sequence_SO=chromosome | SO=protein_coding | is_pseudo=false	TGGT1_244000-t26_1-p1	112 kDa	0.996445	7	1	1093506	1122748	835048	0.68	0.94	0.72
TRUE	Empty	TGGT1_218280-t26_1-p1 | transcript=TGGT1_218280-t26_1 | gene=TGGT1_218280 | organism=Toxoplasma_gondii_GT1 | gene_product=putative eukaryotic porin | transcript_product=putative eukaryotic porin | location=TGGT1_chrXII:1568398-1573590(+) | protein_length=466 | sequence_SO=chromosome | SO=protein_coding | is_pseudo=false	TGGT1_218280-t26_1-p1	51 kDa	0.996089	7	1	8427361	8402508	7275369	0.56	0.97	0.55
TRUE	Empty	TGGT1_227900-t26_1-p1 | transcript=TGGT1_227900-t26_1 | gene=TGGT1_227900 | organism=Toxoplasma_gondii_GT1 | gene_product=AP2 domain transcription factor AP2X-1 | transcript_product=AP2 domain transcription factor AP2X-1 | location=TGGT1_chrX:654907-659009(-) | protein_length=1292 | sequence_SO=chromosome | SO=protein_coding | is_pseudo=false	TGGT1_227900-t26_1-p1	134 kDa	0.995845	7	1	468633	392211	587649	0.46	0.8	0.65
TRUE	Empty	TGGT1_271760-t26_1-p1 | transcript=TGGT1_271760-t26_1 | gene=TGGT1_271760 | organism=Toxoplasma_gondii_GT1 | gene_product=seryl-tRNA synthetase (SerRS2) | transcript_product=seryl-tRNA synthetase (SerRS2) | location=TGGT1_chrVIII:4400859-4410525(-) | protein_length=853 | sequence_SO=chromosome | SO=protein_coding | is_pseudo=false	TGGT1_271760-t26_1-p1	92 kDa	0.995736	7	1	1092237	1226617	1154182	0.35	0.42	0.7
TRUE	Empty	TGGT1_218590-t26_1-p1 | transcript=TGGT1_218590-t26_1 | gene=TGGT1_218590 | organism=Toxoplasma_gondii_GT1 | gene_product=protein phosphatase 2C domain-containing protein | transcript_product=protein phosphatase 2C domain-containing protein | location=TGGT1_chrXII:1332729-1338512(-) | protein_length=901 | sequence_SO=chromosome | SO=protein_coding | is_pseudo=false	TGGT1_218590-t26_1-p1	98 kDa	0.995708	7	1	263252	308136	186657	0.11	0.49	0.29
TRUE	Empty	TGGT1_248600-t26_1-p1 | transcript=TGGT1_248600-t26_1 | gene=TGGT1_248600 | organism=Toxoplasma_gondii_GT1 | gene_product=aspartate aminotransferase | transcript_product=aspartate aminotransferase | location=TGGT1_chrXII:3950218-3958059(-) | protein_length=597 | sequence_SO=chromosome | SO=protein_coding | is_pseudo=false	TGGT1_248600-t26_1-p1	66 kDa	0.995593	7	1	1501173	1898226	1403009	0.3	0.39	0.83
TRUE	Empty	TGGT1_233890-t26_1-p1 | transcript=TGGT1_233890-t26_1 | gene=TGGT1_233890 | organism=Toxoplasma_gondii_GT1 | gene_product=hypothetical protein | transcript_product=hypothetical protein | location=TGGT1_chrVIII:2874227-2879104(-) | protein_length=683 | sequence_SO=chromosome | SO=protein_coding | is_pseudo=false	TGGT1_233890-t26_1-p1	74 kDa	0.995386	7	1	1483181	1692234	1421682	0.53	0.013	0.87
TRUE	Empty	TGGT1_226072-t26_1-p1 | transcript=TGGT1_226072-t26_1 | gene=TGGT1_226072 | organism=Toxoplasma_gondii_GT1 | gene_product=Ser/Thr phosphatase family protein | transcript_product=Ser/Thr phosphatase family protein | location=TGGT1_chrX:1728619-1733841(-) | protein_length=807 | sequence_SO=chromosome | SO=protein_coding | is_pseudo=false	TGGT1_226072-t26_1-p1	89 kDa	0.995381	7	1	891427	988931	804942	0.43	0.67	0.74
TRUE	Empty	TGGT1_309250-t26_1-p1 | transcript=TGGT1_309250-t26_1 | gene=TGGT1_309250 | organism=Toxoplasma_gondii_GT1 | gene_product=hypothetical protein | transcript_product=hypothetical protein | location=TGGT1_chrXI:547054-561278(-) | protein_length=3801 | sequence_SO=chromosome | SO=protein_coding | is_pseudo=false	TGGT1_309250-t26_1-p1	407 kDa	0.995115	7	1	762314	784592	836879	0.87	0.84	0.79
TRUE	Empty	TGGT1_262690-t26_1-p1 | transcript=TGGT1_262690-t26_1 | gene=TGGT1_262690 | organism=Toxoplasma_gondii_GT1 | gene_product=ribosomal protein RPL27 | transcript_product=ribosomal protein RPL27 | location=TGGT1_chrVIIb:1055303-1056255(+) | protein_length=142 | sequence_SO=chromosome | SO=protein_coding | is_pseudo=false	TGGT1_262690-t26_1-p1	16 kDa	0.995064	7	1	18165100	20977950	20104900	0.75	0.19	0.53
TRUE	Empty	TGGT1_244210-t26_1-p1 | transcript=TGGT1_244210-t26_1 | gene=TGGT1_244210 | organism=Toxoplasma_gondii_GT1 | gene_product=RNA polymerase-associated protein RTF1 | transcript_product=RNA polymerase-associated protein RTF1 | location=TGGT1_chrVI:3033644-3040121(-) | protein_length=783 | sequence_SO=chromosome | SO=protein_coding | is_pseudo=false	TGGT1_244210-t26_1-p1	85 kDa	0.994836	7	1	2823201	2592266	3156880	0.23	0.85	0.81
TRUE	Empty	TGGT1_236040-t26_1-p1 | transcript=TGGT1_236040-t26_1 | gene=TGGT1_236040 | organism=Toxoplasma_gondii_GT1 | gene_product=fructose-1,6-bisphosphate aldolase | transcript_product=fructose-1,6-bisphosphate aldolase | location=TGGT1_chrX:5139351-5141389(+) | protein_length=433 | sequence_SO=chromosome | SO=protein_coding | is_pseudo=false	TGGT1_236040-t26_1-p1	47 kDa	0.994624	7	1	2315127	1885220	1906778	0.97	0.5	0.085
TRUE	Empty	TGGT1_265410-t26_1-p1 | transcript=TGGT1_265410-t26_1 | gene=TGGT1_265410 | organism=Toxoplasma_gondii_GT1 | gene_product=G-protein beta WD-40 repeat containing protein | transcript_product=G-protein beta WD-40 repeat containing protein | location=TGGT1_chrIX:1391452-1393275(+) | protein_length=607 | sequence_SO=chromosome | SO=protein_coding | is_pseudo=false	TGGT1_265410-t26_1-p1	67 kDa	0.994041	7	1	2651607	2741892	2925155	0.77	0.72	0.65
TRUE	Empty	TGGT1_212880-t26_1-p1 | transcript=TGGT1_212880-t26_1 | gene=TGGT1_212880 | organism=Toxoplasma_gondii_GT1 | gene_product=surface antigen repeat-containing protein | transcript_product=surface antigen repeat-containing protein | location=TGGT1_chrV:528602-556929(-) | protein_length=6672 | sequence_SO=chromosome | SO=protein_coding | is_pseudo=false	TGGT1_212880-t26_1-p1	763 kDa	0.994005	7	1	942880	726431	1200945	0.48	0.1	0.72
TRUE	Empty	TGGT1_216590-t26_1-p1 | transcript=TGGT1_216590-t26_1 | gene=TGGT1_216590 | organism=Toxoplasma_gondii_GT1 | gene_product=HEAT repeat-containing protein | transcript_product=HEAT repeat-containing protein | location=TGGT1_chrXI:5982217-5988765(-) | protein_length=1010 | sequence_SO=chromosome | SO=protein_coding | is_pseudo=false	TGGT1_216590-t26_1-p1	111 kDa	0.993663	7	1	824973	378411	576676	0.34	0.24	0.58
TRUE	Empty	TGGT1_222210-t26_1-p1 | transcript=TGGT1_222210-t26_1 | gene=TGGT1_222210 | organism=Toxoplasma_gondii_GT1 | gene_product=SPFH domain / Band 7 family protein | transcript_product=SPFH domain / Band 7 family protein | location=TGGT1_chrII:939785-944615(-) | protein_length=440 | sequence_SO=chromosome | SO=protein_coding | is_pseudo=false	TGGT1_222210-t26_1-p1	47 kDa	0.993623	7	1	1562630	1663881	1310659	0.17	0.54	0.15
TRUE	Empty	TGGT1_229990-t26_1-p1 | transcript=TGGT1_229990-t26_1 | gene=TGGT1_229990 | organism=Toxoplasma_gondii_GT1 | gene_product=putative T-complex protein 1 subunit alpha | transcript_product=putative T-complex protein 1 subunit alpha | location=TGGT1_chrVIII:493249-499968(-) | protein_length=548 | sequence_SO=chromosome | SO=protein_coding | is_pseudo=false	TGGT1_229990-t26_1-p1	59 kDa	0.99291	7	1	344049	321402	160450	0.19	0.85	0.038
TRUE	Empty	TGGT1_321450-t26_1-p1 | transcript=TGGT1_321450-t26_1 | gene=TGGT1_321450 | organism=Toxoplasma_gondii_GT1 | gene_product=Myb family DNA-binding domain-containing protein | transcript_product=Myb family DNA-binding domain-containing protein | location=TGGT1_chrIb:1792947-1808537(+) | protein_length=4220 | sequence_SO=chromosome | SO=protein_coding | is_pseudo=false	TGGT1_321450-t26_1-p1	437 kDa	0.992698	7	1	18194440	2274215	3158232	0.88	0.29	0.37
TRUE	Empty	TGGT1_226970-t26_1-p1 | transcript=TGGT1_226970-t26_1 | gene=TGGT1_226970 | organism=Toxoplasma_gondii_GT1 | gene_product=ribosomal protein RPS11 | transcript_product=ribosomal protein RPS11 | location=TGGT1_chrX:1087439-1090315(-) | protein_length=161 | sequence_SO=chromosome | SO=protein_coding | is_pseudo=false	TGGT1_226970-t26_1-p1	19 kDa	0.992623	7	1	15870550	18790140	21219100	0.64	0.31	0.37
TRUE	Empty	TGGT1_242660-t26_1-p1 | transcript=TGGT1_242660-t26_1 | gene=TGGT1_242660 | organism=Toxoplasma_gondii_GT1 | gene_product=putative vacuolar sorting protein 35 | transcript_product=putative vacuolar sorting protein 35 | location=TGGT1_chrVI:2073553-2082575(-) | protein_length=852 | sequence_SO=chromosome | SO=protein_coding | is_pseudo=false	TGGT1_242660-t26_1-p1	96 kDa	0.99254	7	1	718498	570681	518185	0.73	0.48	0.14
TRUE	Empty	TGGT1_207770-t26_1-p1 | transcript=TGGT1_207770-t26_1 | gene=TGGT1_207770 | organism=Toxoplasma_gondii_GT1 | gene_product=PCI domain-containing protein | transcript_product=PCI domain-containing protein | location=TGGT1_chrIb:293641-299816(-) | protein_length=511 | sequence_SO=chromosome | SO=protein_coding | is_pseudo=false	TGGT1_207770-t26_1-p1	56 kDa	0.992213	7	1	1225969	1011695	1287713	0.27	0.53	0.88
TRUE	Empty	TGGT1_255240-t26_1-p1 | transcript=TGGT1_255240-t26_1 | gene=TGGT1_255240 | organism=Toxoplasma_gondii_GT1 | gene_product=hypothetical protein | transcript_product=hypothetical protein | location=TGGT1_chrVIIb:4877042-4891479(-) | protein_length=2465 | sequence_SO=chromosome | SO=protein_coding | is_pseudo=false	TGGT1_255240-t26_1-p1	270 kDa	0.991308	7	1	1486299	1891926	1579443	0.12	0.3	0.78
TRUE	Empty	TGGT1_272030A-t26_1-p1 | transcript=TGGT1_272030A-t26_1 | gene=TGGT1_272030A | organism=Toxoplasma_gondii_GT1 | gene_product=kelch repeat-containing protein | transcript_product=kelch repeat-containing protein | location=TGGT1_chrVIII:4203652-4207381(-) | protein_length=595 | sequence_SO=chromosome | SO=protein_coding | is_pseudo=false	TGGT1_272030A-t26_1-p1	64 kDa	0.991214	7	1	630642	686886	734288	0.69	0.3	0.37
TRUE	Empty	TGGT1_280400-t26_1-p1 | transcript=TGGT1_280400-t26_1 | gene=TGGT1_280400 | organism=Toxoplasma_gondii_GT1 | gene_product=hypothetical protein | transcript_product=hypothetical protein | location=TGGT1_chrVIIa:425141-443031(+) | protein_length=1157 | sequence_SO=chromosome | SO=protein_coding | is_pseudo=false	TGGT1_280400-t26_1-p1	131 kDa	0.991182	7	1	876538	749290	844320	0.19	0.33	0.77
TRUE	Empty	TGGT1_234450-t26_1-p1 | transcript=TGGT1_234450-t26_1 | gene=TGGT1_234450 | organism=Toxoplasma_gondii_GT1 | gene_product=ribosomal protein RPS15A | transcript_product=ribosomal protein RPS15A | location=TGGT1_chrX:4292801-4294683(+) | protein_length=231 | sequence_SO=chromosome | SO=protein_coding | is_pseudo=false	TGGT1_234450-t26_1-p1	27 kDa	0.990147	7	1	57678760	93946340	104287100	0.79	0.3	0.026
TRUE	Empty	TGGT1_256760-t26_1-p1 | transcript=TGGT1_256760-t26_1 | gene=TGGT1_256760 | organism=Toxoplasma_gondii_GT1 | gene_product=pyruvate kinase PyK1 | transcript_product=pyruvate kinase PyK1 | location=TGGT1_chrVIIb:4413512-4417055(-) | protein_length=531 | sequence_SO=chromosome | SO=protein_coding | is_pseudo=false	TGGT1_256760-t26_1-p1	58 kDa	0.990135	7	1	580948	776309	688378	0.74	0.64	0.75
TRUE	Empty	TGGT1_228150-t26_1-p1 | transcript=TGGT1_228150-t26_1 | gene=TGGT1_228150 | organism=Toxoplasma_gondii_GT1 | gene_product=hypothetical protein | transcript_product=hypothetical protein | location=TGGT1_chrX:450432-458115(+) | protein_length=2115 | sequence_SO=chromosome | SO=protein_coding | is_pseudo=false	TGGT1_228150-t26_1-p1	215 kDa	0.989462	7	1	407348	443904	577811	0.49	0.91	0.67
TRUE	Empty	TGGT1_269010-t26_1-p1 | transcript=TGGT1_269010-t26_1 | gene=TGGT1_269010 | organism=Toxoplasma_gondii_GT1 | gene_product=AP2 domain transcription factor AP2VIII-7 | transcript_product=AP2 domain transcription factor AP2VIII-7 | location=TGGT1_chrVIII:6138950-6142226(+) | protein_length=870 | sequence_SO=chromosome | SO=protein_coding | is_pseudo=false	TGGT1_269010-t26_1-p1	89 kDa	0.989306	7	1	818655	763107	998659	0.016	0.81	0.51
TRUE	Empty	TGGT1_280600-t26_1-p1 | transcript=TGGT1_280600-t26_1 | gene=TGGT1_280600 | organism=Toxoplasma_gondii_GT1 | gene_product=putative histidyl-tRNA synthetase (HisRS) | transcript_product=putative histidyl-tRNA synthetase (HisRS) | location=TGGT1_chrVIIa:251998-256202(-) | protein_length=1252 | sequence_SO=chromosome | SO=protein_coding | is_pseudo=false	TGGT1_280600-t26_1-p1	135 kDa	0.988969	7	1	2823771	1775080	3214380	0.13	0.22	0.72
TRUE	Empty	TGGT1_243610-t26_1-p1 | transcript=TGGT1_243610-t26_1 | gene=TGGT1_243610 | organism=Toxoplasma_gondii_GT1 | gene_product=C-5 cytosine-specific DNA methylase superfamily protein | transcript_product=C-5 cytosine-specific DNA methylase superfamily protein | location=TGGT1_chrVI:2664010-2666755(+) | protein_length=883 | sequence_SO=chromosome | SO=protein_coding | is_pseudo=false	TGGT1_243610-t26_1-p1	97 kDa	0.988204	7	1	3928518	4660344	4530131	0.84	0.45	0.57
TRUE	Empty	TGGT1_301250-t26_1-p1 | transcript=TGGT1_301250-t26_1 | gene=TGGT1_301250 | organism=Toxoplasma_gondii_GT1 | gene_product=hypothetical protein | transcript_product=hypothetical protein | location=TGGT1_chrIV:2233880-2236785(+) | protein_length=851 | sequence_SO=chromosome | SO=protein_coding | is_pseudo=false	TGGT1_301250-t26_1-p1	96 kDa	0.982171	7	1	1663667	1343423	1553465	0.68	0.32	0.85
TRUE	Empty	TGGT1_235420-t26_1-p1 | transcript=TGGT1_235420-t26_1 | gene=TGGT1_235420 | organism=Toxoplasma_gondii_GT1 | gene_product=hypothetical protein | transcript_product=hypothetical protein | location=TGGT1_chrX:4743542-4757528(-) | protein_length=4118 | sequence_SO=chromosome | SO=protein_coding | is_pseudo=false	TGGT1_235420-t26_1-p1	424 kDa	0.981598	7	1	95165.7	56148.6	201869	0.28	0.58	0.59
TRUE	Empty	TGGT1_211700-t26_1-p1 | transcript=TGGT1_211700-t26_1 | gene=TGGT1_211700 | organism=Toxoplasma_gondii_GT1 | gene_product=hypothetical protein | transcript_product=hypothetical protein | location=TGGT1_chrIV:1515365-1526809(-) | protein_length=2520 | sequence_SO=chromosome | SO=protein_coding | is_pseudo=false	TGGT1_211700-t26_1-p1	274 kDa	0.978195	7	1	2759972	2608644	3622247	0.19	0.7	0.24
TRUE	Empty	TGGT1_265220-t26_1-p1 | transcript=TGGT1_265220-t26_1 | gene=TGGT1_265220 | organism=Toxoplasma_gondii_GT1 | gene_product=co-chaperone GrpE protein | transcript_product=co-chaperone GrpE protein | location=TGGT1_chrIX:1508483-1511488(+) | protein_length=347 | sequence_SO=chromosome | SO=protein_coding | is_pseudo=false	TGGT1_265220-t26_1-p1	38 kDa	0.97663	7	1	660673	545412	684683	0.8	0.41	0.97
TRUE	Empty	TGGT1_233450-t26_1-p1 | transcript=TGGT1_233450-t26_1 | gene=TGGT1_233450 | organism=Toxoplasma_gondii_GT1 | gene_product=SAG-related sequence SRS29A | transcript_product=SAG-related sequence SRS29A | location=TGGT1_chrVIII:2656903-2658165(+) | protein_length=420 | sequence_SO=chromosome | SO=protein_coding | is_pseudo=false	TGGT1_233450-t26_1-p1	44 kDa	0.999998	6	1	4036560	5243850	3506711	0.083	0.1	0.37
TRUE	Empty	TGGT1_230430-t26_1-p1 | transcript=TGGT1_230430-t26_1 | gene=TGGT1_230430 | organism=Toxoplasma_gondii_GT1 | gene_product=putative vesicle-associated membrane protein | transcript_product=putative vesicle-associated membrane protein | location=TGGT1_chrVIII:775206-779637(+) | protein_length=221 | sequence_SO=chromosome | SO=protein_coding | is_pseudo=false	TGGT1_230430-t26_1-p1	25 kDa	0.999997	6	1	6059308	6135519	5747002	0.27	0.93	0.71
TRUE	Empty	TGGT1_261250-t26_1-p1 | transcript=TGGT1_261250-t26_1 | gene=TGGT1_261250 | organism=Toxoplasma_gondii_GT1 | gene_product=histone H2A1 | transcript_product=histone H2A1 | location=TGGT1_chrVIIb:1779724-1780266(-) | protein_length=180 | sequence_SO=chromosome | SO=protein_coding | is_pseudo=false	TGGT1_261250-t26_1-p1	20 kDa	0.999996	5	0.4	101019500	88861530	90597980	0.96	0.53	0.79
TRUE	Empty	TGGT1_273860-t26_1-p1 | transcript=TGGT1_273860-t26_1 | gene=TGGT1_273860 | organism=Toxoplasma_gondii_GT1 | gene_product=hypothetical protein | transcript_product=hypothetical protein | location=TGGT1_chrVIII:3215892-3216923(+) | protein_length=343 | sequence_SO=chromosome | SO=protein_coding | is_pseudo=false	TGGT1_273860-t26_1-p1	38 kDa	0.999994	6	1	2069778	1844127	1886069	0.94	0.12	0.77
TRUE	Empty	TGGT1_212270-t26_1-p1 | transcript=TGGT1_212270-t26_1 | gene=TGGT1_212270 | organism=Toxoplasma_gondii_GT1 | gene_product=hypothetical protein | transcript_product=hypothetical protein | location=TGGT1_chrX:3855671-3857610(+) | protein_length=370 | sequence_SO=chromosome | SO=protein_coding | is_pseudo=false	TGGT1_212270-t26_1-p1	41 kDa	0.99999	6	1	1881394	1978188	1596014	0.08	0.77	0.38
TRUE	Empty	TGGT1_237250-t26_1-p1 | transcript=TGGT1_237250-t26_1 | gene=TGGT1_237250 | organism=Toxoplasma_gondii_GT1 | gene_product=hypothetical protein | transcript_product=hypothetical protein | location=TGGT1_chrX:5697810-5699972(+) | protein_length=259 | sequence_SO=chromosome | SO=protein_coding | is_pseudo=false	TGGT1_237250-t26_1-p1	29 kDa	0.999986	6	1	7240314	8308366	7897655	0.28	0.59	0.73
TRUE	Empty	TGGT1_220950-t26_1-p1 | transcript=TGGT1_220950-t26_1 | gene=TGGT1_220950 | organism=Toxoplasma_gondii_GT1 | gene_product=hypothetical protein | transcript_product=hypothetical protein | location=TGGT1_chrII:72817-74397(+) | protein_length=334 | sequence_SO=chromosome | SO=protein_coding | is_pseudo=false	TGGT1_220950-t26_1-p1	36 kDa	0.999978	6	0.67	33335590	32093090	28381780	0.29	0.67	0.063
TRUE	Empty	TGGT1_313180-t26_1-p1 | transcript=TGGT1_313180-t26_1 | gene=TGGT1_313180 | organism=Toxoplasma_gondii_GT1 | gene_product=putative cell-cycle-associated protein kinase PRP4 | transcript_product=putative cell-cycle-associated protein kinase PRP4 | location=TGGT1_chrXI:3115853-3121175(-) | protein_length=928 | sequence_SO=chromosome | SO=protein_coding | is_pseudo=false	TGGT1_313180-t26_1-p1	107 kDa	0.999971	6	1	1385609	1404769	1455485	0.83	0.88	0.79
TRUE	Empty	TGGT1_213910-t26_1-p1 | transcript=TGGT1_213910-t26_1 | gene=TGGT1_213910 | organism=Toxoplasma_gondii_GT1 | gene_product=hypothetical protein | transcript_product=hypothetical protein | location=TGGT1_chrV:1293579-1296140(+) | protein_length=403 | sequence_SO=chromosome | SO=protein_coding | is_pseudo=false	TGGT1_213910-t26_1-p1	44 kDa	0.999957	6	1	5140876	4209887	4796637	0.28	0.28	0.7
TRUE	Empty	TGGT1_271930-t26_1-p1 | transcript=TGGT1_271930-t26_1 | gene=TGGT1_271930 | organism=Toxoplasma_gondii_GT1 | gene_product=hypothetical protein | transcript_product=hypothetical protein | location=TGGT1_chrVIII:4274565-4276322(+) | protein_length=234 | sequence_SO=chromosome | SO=protein_coding | is_pseudo=false	TGGT1_271930-t26_1-p1	26 kDa	0.999955	5	1	1746423	2165803	1429731	0.19	0.21	0.42
TRUE	Empty	TGGT1_239010-t26_1-p1 | transcript=TGGT1_239010-t26_1 | gene=TGGT1_239010 | organism=Toxoplasma_gondii_GT1 | gene_product=hypothetical protein | transcript_product=hypothetical protein | location=TGGT1_chrVI:386043-388100(-) | protein_length=685 | sequence_SO=chromosome | SO=protein_coding | is_pseudo=false	TGGT1_239010-t26_1-p1	71 kDa	0.999934	6	1	4184504	4157946	4784108	0.42	0.92	0.39
TRUE	Empty	TGGT1_288400-t26_1-p1 | transcript=TGGT1_288400-t26_1 | gene=TGGT1_288400 | organism=Toxoplasma_gondii_GT1 | gene_product=LETM1 family protein | transcript_product=LETM1 family protein | location=TGGT1_chrIX:2306244-2318068(-) | protein_length=1101 | sequence_SO=chromosome | SO=protein_coding | is_pseudo=false	TGGT1_288400-t26_1-p1	120 kDa	0.999895	6	1	679608	748639	656408	0.81	0.59	0.95
TRUE	Empty	TGGT1_316540-t26_1-p1 | transcript=TGGT1_316540-t26_1 | gene=TGGT1_316540 | organism=Toxoplasma_gondii_GT1 | gene_product=IMC sub-compartment protein ISP3 | transcript_product=IMC sub-compartment protein ISP3 | location=TGGT1_chrXI:5335579-5336073(-) | protein_length=164 | sequence_SO=chromosome | SO=protein_coding | is_pseudo=false	TGGT1_316540-t26_1-p1	18 kDa	0.999891	5	1	7088292	7634273	6053071	0.27	0.77	0.6
TRUE	Empty	TGGT1_232520-t26_1-p1 | transcript=TGGT1_232520-t26_1 | gene=TGGT1_232520 | organism=Toxoplasma_gondii_GT1 | gene_product=brix domain-containing protein | transcript_product=brix domain-containing protein | location=TGGT1_chrVIII:2131005-2132727(-) | protein_length=401 | sequence_SO=chromosome | SO=protein_coding | is_pseudo=false	TGGT1_232520-t26_1-p1	43 kDa	0.999889	6	1	962471	1212393	1059893	0.73	0.59	0.86
TRUE	Empty	TGGT1_275860-t26_1-p1 | transcript=TGGT1_275860-t26_1 | gene=TGGT1_275860 | organism=Toxoplasma_gondii_GT1 | gene_product=hypothetical protein | transcript_product=hypothetical protein | location=TGGT1_chrIII:168447-170625(+) | protein_length=383 | sequence_SO=chromosome | SO=protein_coding | is_pseudo=false	TGGT1_275860-t26_1-p1	43 kDa	0.999882	6	1	1988243	1875578	1755003	0.72	0.75	0.5
TRUE	Empty	TGGT1_213520-t26_1-p1 | transcript=TGGT1_213520-t26_1 | gene=TGGT1_213520 | organism=Toxoplasma_gondii_GT1 | gene_product=peptidase M20D, amidohydrolase | transcript_product=peptidase M20D, amidohydrolase | location=TGGT1_chrV:983024-989231(-) | protein_length=514 | sequence_SO=chromosome | SO=protein_coding | is_pseudo=false	TGGT1_213520-t26_1-p1	55 kDa	0.999866	6	1	869875	937816	879519	0.83	0.8	0.97
TRUE	Empty	TGGT1_313400-t26_1-p1 | transcript=TGGT1_313400-t26_1 | gene=TGGT1_313400 | organism=Toxoplasma_gondii_GT1 | gene_product=DnaJ domain-containing protein | transcript_product=DnaJ domain-containing protein | location=TGGT1_chrXI:3303512-3308107(-) | protein_length=293 | sequence_SO=chromosome | SO=protein_coding | is_pseudo=false	TGGT1_313400-t26_1-p1	32 kDa	0.999863	6	0.83	1958121	1711750	2179299	0.54	0.52	0.8
TRUE	Empty	TGGT1_297430-t26_1-p1 | transcript=TGGT1_297430-t26_1 | gene=TGGT1_297430 | organism=Toxoplasma_gondii_GT1 | gene_product=hypothetical protein | transcript_product=hypothetical protein | location=TGGT1_chrII:1749482-1752364(+) | protein_length=248 | sequence_SO=chromosome | SO=protein_coding | is_pseudo=false	TGGT1_297430-t26_1-p1	25 kDa	0.999853	6	1	2721679	3064628	2672238	0.009	0.27	0.84
TRUE	Empty	TGGT1_270060-t26_1-p1 | transcript=TGGT1_270060-t26_1 | gene=TGGT1_270060 | organism=Toxoplasma_gondii_GT1 | gene_product=hypothetical protein | transcript_product=hypothetical protein | location=TGGT1_chrVIII:5438141-5440105(-) | protein_length=654 | sequence_SO=chromosome | SO=protein_coding | is_pseudo=false	TGGT1_270060-t26_1-p1	68 kDa	0.999844	6	1	759233	605677	782498	0.022	0.027	0.61
TRUE	Empty	TGGT1_286720-t26_1-p1 | transcript=TGGT1_286720-t26_1 | gene=TGGT1_286720 | organism=Toxoplasma_gondii_GT1 | gene_product=heat shock protein HSP28 | transcript_product=heat shock protein HSP28 | location=TGGT1_chrV:1565219-1566049(+) | protein_length=276 | sequence_SO=chromosome | SO=protein_coding | is_pseudo=false	TGGT1_286720-t26_1-p1	31 kDa	0.999832	6	1	3302173	3232554	2557210	0.18	0.89	0.28
TRUE	Empty	TGGT1_205350-t26_1-p1 | transcript=TGGT1_205350-t26_1 | gene=TGGT1_205350 | organism=Toxoplasma_gondii_GT1 | gene_product=putative integral membrane protein, GNS1/SUR4 family protein | transcript_product=putative integral membrane protein, GNS1/SUR4 family protein | location=TGGT1_chrVIIa:1373006-1374809(-) | protein_length=318 | sequence_SO=chromosome | SO=protein_coding | is_pseudo=false	TGGT1_205350-t26_1-p1	38 kDa	0.999822	6	1	6179267	7148763	6824932	0.6	0.26	0.38
TRUE	Empty	TGGT1_294790-t26_1-p1 | transcript=TGGT1_294790-t26_1 | gene=TGGT1_294790 | organism=Toxoplasma_gondii_GT1 | gene_product=hypothetical protein | transcript_product=hypothetical protein | location=TGGT1_chrIa:1130567-1131622(-) | protein_length=351 | sequence_SO=chromosome | SO=protein_coding | is_pseudo=false	TGGT1_294790-t26_1-p1	38 kDa	0.999821	6	1	2465247	2968079	2549551	0.54	0.59	0.93
TRUE	Empty	TGGT1_218760-t26_1-p1 | transcript=TGGT1_218760-t26_1 | gene=TGGT1_218760 | organism=Toxoplasma_gondii_GT1 | gene_product=putative SNAP protein (soluble N-ethylmaleimide-sensitive factor Attachment Protein) | transcript_product=putative SNAP protein (soluble N-ethylmaleimide-sensitive factor Attachment Protein) | location=TGGT1_chrXII:1264192-1267346(+) | protein_length=329 | sequence_SO=chromoso…	TGGT1_218760-t26_1-p1	36 kDa	0.999818	6	1	1636075	1929824	1715845	0.29	0.38	0.74
TRUE	Empty	TGGT1_231960-t26_1-p1 | transcript=TGGT1_231960-t26_1 | gene=TGGT1_231960 | organism=Toxoplasma_gondii_GT1 | gene_product=putative omega secalin | transcript_product=putative omega secalin | location=TGGT1_chrVIII:1668838-1672885(-) | protein_length=1111 | sequence_SO=chromosome | SO=protein_coding | is_pseudo=false	TGGT1_231960-t26_1-p1	120 kDa	0.999807	6	1	780108	925966	576053	0.21	0.62	0.15
TRUE	Empty	TGGT1_237150-t26_1-p1 | transcript=TGGT1_237150-t26_1 | gene=TGGT1_237150 | organism=Toxoplasma_gondii_GT1 | gene_product=putative minor histocompatibility antigen h13 | transcript_product=putative minor histocompatibility antigen h13 | location=TGGT1_chrX:5632583-5637249(-) | protein_length=417 | sequence_SO=chromosome | SO=protein_coding | is_pseudo=false	TGGT1_237150-t26_1-p1	46 kDa	0.9998	6	1	7361087	7580299	7923659	0.55	0.89	0.71
TRUE	Empty	TGGT1_310030-t26_1-p1 | transcript=TGGT1_310030-t26_1 | gene=TGGT1_310030 | organism=Toxoplasma_gondii_GT1 | gene_product=putative cyclase-associated protein | transcript_product=putative cyclase-associated protein | location=TGGT1_chrXI:977166-978111(-) | protein_length=203 | sequence_SO=chromosome | SO=protein_coding | is_pseudo=false	TGGT1_310030-t26_1-p1	22 kDa	0.999797	6	1	1541733	1841428	1359734	0.16	0.42	0.62
TRUE	Empty	TGGT1_201270-t26_1-p1 | transcript=TGGT1_201270-t26_1 | gene=TGGT1_201270 | organism=Toxoplasma_gondii_GT1 | gene_product=hypothetical protein | transcript_product=hypothetical protein | location=TGGT1_chrVIIa:3819439-3825216(-) | protein_length=964 | sequence_SO=chromosome | SO=protein_coding | is_pseudo=false	TGGT1_201270-t26_1-p1	104 kDa	0.999787	6	1	955612	1160058	1143772	0.73	0.28	0.31
TRUE	Empty	TGGT1_316340-t26_1-p1 | transcript=TGGT1_316340-t26_1 | gene=TGGT1_316340 | organism=Toxoplasma_gondii_GT1 | gene_product=hypothetical protein | transcript_product=hypothetical protein | location=TGGT1_chrXI:5191484-5192942(+) | protein_length=243 | sequence_SO=chromosome | SO=protein_coding | is_pseudo=false	TGGT1_316340-t26_1-p1	27 kDa	0.999726	5	1	1861398	2001820	1278545	0.48	0.83	0.49
TRUE	Empty	TGGT1_286790-t26_1-p1 | transcript=TGGT1_286790-t26_1 | gene=TGGT1_286790 | organism=Toxoplasma_gondii_GT1 | gene_product=nuclear factor NF2 | transcript_product=nuclear factor NF2 | location=TGGT1_chrV:1521521-1525782(+) | protein_length=313 | sequence_SO=chromosome | SO=protein_coding | is_pseudo=false	TGGT1_286790-t26_1-p1	36 kDa	0.999689	6	1	2940408	2249935	3779136	0.16	0.37	0.04
TRUE	Empty	TGGT1_312622-t26_1-p1 | transcript=TGGT1_312622-t26_1 | gene=TGGT1_312622 | organism=Toxoplasma_gondii_GT1 | gene_product=DUF803 domain-containing protein | transcript_product=DUF803 domain-containing protein | location=TGGT1_chrXI:2792522-2800888(-) | protein_length=814 | sequence_SO=chromosome | SO=protein_coding | is_pseudo=false	TGGT1_312622-t26_1-p1	87 kDa	0.999678	6	1	1374804	1744215	1285603	0.21	0.37	0.82
TRUE	Empty	TGGT1_284560-t26_1-p1 | transcript=TGGT1_284560-t26_1 | gene=TGGT1_284560 | organism=Toxoplasma_gondii_GT1 | gene_product=ribosomal protein RPL9 | transcript_product=ribosomal protein RPL9 | location=TGGT1_chrV:2561959-2564374(+) | protein_length=190 | sequence_SO=chromosome | SO=protein_coding | is_pseudo=false	TGGT1_284560-t26_1-p1	21 kDa	0.999668	6	1	10560890	11651540	15049850	0.6	0.74	0.53
[truncated: 1,636 more rows]
