# Supplementary material for: Analysis of CDPK1 targets identifies a trafficking adaptor complex that regulates microneme exocytosis in Toxoplasma
Source: eLife. 2023 Nov 7;12:RP85654. doi: 10.7554/eLife.85654 (PMC10629828; doi:10.7554/eLife.85654)
Supplement: Supplementary file 6. — Peptide and abundance assignments from Proteome Discoverer 2.4 and analysis. (A) RAW peptide and abundance assignments. (B) Analyzed peptides with enrichment significance values. (C) Analyzed flow-through peptides used for normalization. [file elife-85654-supp6.xlsx]

## Sheet: 6.1_ThioP_peptide_RAW
Checked	Confidence	Sequence	Annotated Sequence	Modifications	Modifications (all possible sites)	Modifications in Master Proteins	Modifications in Master Proteins (all Sites)	Qvality PEP	Qvality q-value	# Protein Groups	# Proteins	# PSMs	Master Protein Accessions	Master Protein Descriptions	Positions in Master Proteins	# Missed Cleavages	Theo. MH+ [Da]	Sequence Length	Abundance Ratio: (heavy, eluate, dKu80) / (light, eluate, 1M)	Abundance Ratio: (heavy, supernatant, dKu80) / (light, supernatant, 1M)	Abundance Ratio (log2): (heavy, eluate, dKu80) / (light, eluate, 1M)	Abundance Ratio (log2): (heavy, supernatant, dKu80) / (light, supernatant, 1M)	Abundance Ratio P-Value: (heavy, eluate, dKu80) / (light, eluate, 1M)	Abundance Ratio P-Value: (heavy, supernatant, dKu80) / (light, supernatant, 1M)	Abundance Ratio Adj. P-Value: (heavy, eluate, dKu80) / (light, eluate, 1M)	Abundance Ratio Adj. P-Value: (heavy, supernatant, dKu80) / (light, supernatant, 1M)	Abundance Ratio Variability [%]: (heavy, eluate, dKu80) / (light, eluate, 1M)	Abundance Ratio Variability [%]: (heavy, supernatant, dKu80) / (light, supernatant, 1M)	Abundance Ratios (by Bio. Rep.): (heavy, eluate, dKu80,1) / (light, eluate, 1M,1)	Abundance Ratios (by Bio. Rep.): (heavy, eluate, dKu80,2) / (light, eluate, 1M,2)	Abundance Ratios (by Bio. Rep.): (heavy, eluate, dKu80,3) / (light, eluate, 1M,3)	Abundance Ratios (by Bio. Rep.): (heavy, supernatant, dKu80,1) / (light, supernatant, 1M,1)	Abundance Ratios (by Bio. Rep.): (heavy, supernatant, dKu80,2) / (light, supernatant, 1M,2)	Abundance Ratios (by Bio. Rep.): (heavy, supernatant, dKu80,3) / (light, supernatant, 1M,3)	Abundance Ratios (log2) (by Bio. Rep.): (heavy, eluate, dKu80,1) / (light, eluate, 1M,1)	Abundance Ratios (log2) (by Bio. Rep.): (heavy, eluate, dKu80,2) / (light, eluate, 1M,2)	Abundance Ratios (log2) (by Bio. Rep.): (heavy, eluate, dKu80,3) / (light, eluate, 1M,3)	Abundance Ratios (log2) (by Bio. Rep.): (heavy, supernatant, dKu80,1) / (light, supernatant, 1M,1)	Abundance Ratios (log2) (by Bio. Rep.): (heavy, supernatant, dKu80,2) / (light, supernatant, 1M,2)	Abundance Ratios (log2) (by Bio. Rep.): (heavy, supernatant, dKu80,3) / (light, supernatant, 1M,3)	Abundances (Grouped): light, eluate, 1M	Abundances (Grouped): heavy, eluate, dKu80	Abundances (Grouped): light, supernatant, 1M	Abundances (Grouped): heavy, supernatant, dKu80	Abundances (Grouped) CV [%]: light, eluate, 1M	Abundances (Grouped) CV [%]: heavy, eluate, dKu80	Abundances (Grouped) CV [%]: light, supernatant, 1M	Abundances (Grouped) CV [%]: heavy, supernatant, dKu80	Abundances (by Bio. Rep.): light, eluate, 1M,1
FALSE	High	EFAEENGDASPEAK	[K].EFAEENGDASPEAK.[K]	1xLabel:13C(6)15N(2) [K14]	1xLabel:13C(6)15N(2) [K14]			3.12714e-05	0	1	1	9	TGGT1_218780-t26_1-p1	transcript=TGGT1_218780-t26_1 | gene=TGGT1_218780 | organism=Toxoplasma_gondii_GT1 | gene_product=putative phosphoserine aminotransferase | transcript_product=putative phosphoserine aminotransferase | location=TGGT1_chrXII:1247991-1254054(-) | protein_length=481 | sequence_SO=chromosome | SO=protein_coding	TGGT1_218780-t26_1-p1 [449-462]	0	1501.65	14	0.754	0.686	-0.41	-0.54	0.106368	0.0517414	0.539202	0.270558	11.44	10.51	0.856	0.754	0.576	0.686	0.789	0.573	-0.22	-0.41	-0.8	-0.54	-0.34	-0.8	149087	107925	885636	682721	10.81	28.33	23.39	15.45	174790
FALSE	High	VFLENIIKDSVTYTEHAR	[K].VFLENIIKDSVTYTEHAR.[R]					5.02765e-08	0	1	1	9	TGGT1_239260-t26_1-p1	transcript=TGGT1_239260-t26_1 | gene=TGGT1_239260 | organism=Toxoplasma_gondii_GT1 | gene_product=histone H4 | transcript_product=histone H4 | location=TGGT1_chrVI:491746-492057(-) | protein_length=103 | sequence_SO=chromosome | SO=protein_coding	TGGT1_239260-t26_1-p1 [61-78]	1	2135.11	18
FALSE	High	TEGSAGHMIQVLNLETK	[K].TEGSAGHMIQVLNLETK.[V]					6.00571e-05	0	1	1	1	TGGT1_290950-t26_1-p1	transcript=TGGT1_290950-t26_1 | gene=TGGT1_290950 | organism=Toxoplasma_gondii_GT1 | gene_product=putative clathrin heavy chain | transcript_product=putative clathrin heavy chain | location=TGGT1_chrIX:3770246-3782423(-) | protein_length=1731 | sequence_SO=chromosome | SO=protein_coding	TGGT1_290950-t26_1-p1 [97-113]	0	1827.93	17
FALSE	High	EVLHDKVEQVVVSNR	[K].EVLHDKVEQVVVSNR.[I]	1xLabel:13C(6)15N(2) [K6]; 1xLabel:13C(6)15N(4) [R15]	1xLabel:13C(6)15N(2) [K6]; 1xLabel:13C(6)15N(4) [R15]			1.1845e-05	0	1	1	14	TGGT1_288380-t26_1-p1	transcript=TGGT1_288380-t26_1 | gene=TGGT1_288380 | organism=Toxoplasma_gondii_GT1 | gene_product=heat shock protein HSP90 | transcript_product=heat shock protein HSP90 | location=TGGT1_chrIX:2294323-2298742(+) | protein_length=708 | sequence_SO=chromosome | SO=protein_coding	TGGT1_288380-t26_1-p1 [554-568]	1	1768.97	15
FALSE	High	LAAALGAEIISTFDAPDPSK	[R].LAAALGAEIISTFDAPDPSK.[L]					0.000121632	0	1	1	1	TGGT1_243710-t26_1-p1	transcript=TGGT1_243710-t26_1 | gene=TGGT1_243710 | organism=Toxoplasma_gondii_GT1 | gene_product=t-complex protein beta subunit | transcript_product=t-complex protein beta subunit | location=TGGT1_chrVI:2717493-2725570(+) | protein_length=568 | sequence_SO=chromosome | SO=protein_coding	TGGT1_243710-t26_1-p1 [326-345]	0	1987.04	20	0.871	0.372	-0.2	-1.43	0.932955	0.396914	0.973401	0.610495	2.01	19.95	0.871	1.291	0.856	1.824	0.372	0.01	-0.2	0.37	-0.22	0.87	-1.43	-6.64	3181.1	4106.29	10834	4028.51	66.05	55.36	169.54	77.64	1964.91
FALSE	High	EVLHDKVEQVVVSNR	[K].EVLHDKVEQVVVSNR.[I]					2.18382e-05	0	1	1	21	TGGT1_288380-t26_1-p1	transcript=TGGT1_288380-t26_1 | gene=TGGT1_288380 | organism=Toxoplasma_gondii_GT1 | gene_product=heat shock protein HSP90 | transcript_product=heat shock protein HSP90 | location=TGGT1_chrIX:2294323-2298742(+) | protein_length=708 | sequence_SO=chromosome | SO=protein_coding	TGGT1_288380-t26_1-p1 [554-568]	1	1750.94	15	2.218	0.764	1.15	-0.39	0.0656672	0.0140176	0.444977	0.204185	41.52	0.72	3.481	2.218	1.597	0.77	0.764	0.689	1.8	1.15	0.68	-0.38	-0.39	-0.54	531391	1.60445e+06	4.25214e+06	3.24787e+06	28.07	34.05	33.22	27.24	460902
FALSE	High	LAAAPAGGANKPNAPAGK	[K].LAAAPAGGANKPNAPAGK.[A]					4.59974e-05	0	1	1	9	TGGT1_219850-t26_1-p1	transcript=TGGT1_219850-t26_1 | gene=TGGT1_219850 | organism=Toxoplasma_gondii_GT1 | gene_product=prolyl-tRNA synthetase (ProRS) | transcript_product=prolyl-tRNA synthetase (ProRS) | location=TGGT1_chrXII:529404-538395(-) | protein_length=830 | sequence_SO=chromosome | SO=protein_coding	TGGT1_219850-t26_1-p1 [301-318]	0	1575.86	18
FALSE	High	VFLENIIKDSVTYTEHAR	[K].VFLENIIKDSVTYTEHAR.[R]	1xLabel:13C(6)15N(2) [K8]; 1xLabel:13C(6)15N(4) [R18]	1xLabel:13C(6)15N(2) [K8]; 1xLabel:13C(6)15N(4) [R18]			6.84182e-07	0	1	1	9	TGGT1_239260-t26_1-p1	transcript=TGGT1_239260-t26_1 | gene=TGGT1_239260 | organism=Toxoplasma_gondii_GT1 | gene_product=histone H4 | transcript_product=histone H4 | location=TGGT1_chrVI:491746-492057(-) | protein_length=103 | sequence_SO=chromosome | SO=protein_coding	TGGT1_239260-t26_1-p1 [61-78]	1	2153.14	18	1.518	0.68	0.6	-0.56	0.189543	0.928182	0.626424	0.951078	46.03	67.52	1.518	2.18	1.047	0.68	0.01	100	0.6	1.12	0.07	-0.56	-6.64	6.64	5158.44	11244.6	2.45404e+06	1.66835e+06	62.16	37.62	87.57	97.55	3587.13
FALSE	High	EVLEVGGKPLTIHFLR	[R].EVLEVGGKPLTIHFLR.[Q]					4.72176e-05	0	1	1	2	TGGT1_207640-t26_1-p1	transcript=TGGT1_207640-t26_1 | gene=TGGT1_207640 | organism=Toxoplasma_gondii_GT1 | gene_product=isoleucyl-tRNA synthetase family protein | transcript_product=isoleucyl-tRNA synthetase family protein | location=TGGT1_chrIb:186451-201730(-) | protein_length=1242 | sequence_SO=chromosome | SO=protein_coding	TGGT1_207640-t26_1-p1 [1226-1241]	0	1808.04	16	0.878	1.279	-0.19	0.35	0.86891	0.587088	0.952313	0.707311	73.91	147.1	0.878	2.599	0.311	1.279	3.235	0.01	-0.19	1.38	-1.69	0.35	1.69	-6.64	11779.9	7102.45	10356	9636.67	61.72	43.04	169.9	44.09	11779.9
FALSE	High	LAAAPAGGANKPNAPAGK	[K].LAAAPAGGANKPNAPAGK.[A]	2xLabel:13C(6)15N(2) [K11; K18]	2xLabel:13C(6)15N(2) [K11; K18]			8.16012e-05	0	1	1	5	TGGT1_219850-t26_1-p1	transcript=TGGT1_219850-t26_1 | gene=TGGT1_219850 | organism=Toxoplasma_gondii_GT1 | gene_product=prolyl-tRNA synthetase (ProRS) | transcript_product=prolyl-tRNA synthetase (ProRS) | location=TGGT1_chrXII:529404-538395(-) | protein_length=830 | sequence_SO=chromosome | SO=protein_coding	TGGT1_219850-t26_1-p1 [301-318]	0	1591.89	18	0.561	0.673	-0.83	-0.57	0.219997	0.000326612	0.656091	0.177261	1.97	0.4	0.561	0.584	0.064	0.673	0.677	0.661	-0.83	-0.77	-3.97	-0.57	-0.56	-0.6	101948	40864.5	2503419	1.66708e+06	53.52	100.49	32.95	32.31	196229
FALSE	High	VFIGGQFLGGADDTIR	[R].VFIGGQFLGGADDTIR.[A]					5.73442e-05	0	1	1	3	TGGT1_279400-t26_1-p1	transcript=TGGT1_279400-t26_1 | gene=TGGT1_279400 | organism=Toxoplasma_gondii_GT1 | gene_product=putative glutaredoxin | transcript_product=putative glutaredoxin | location=TGGT1_chrIX:38768-40339(+) | protein_length=146 | sequence_SO=chromosome | SO=protein_coding	TGGT1_279400-t26_1-p1 [114-129]	0	1665.86	16	1.729	43.435	0.79	5.44	0.408692	0.127279	0.743129	0.436938	88.62	141.62	1.729	4.007	0.696	93.018	43.435	1.946	0.79	2	-0.52	6.54	5.44	0.96	5217.82	8869.81	9597.07	866115	93.86	38.15	170.86	111.31	5217.82
FALSE	High	VFIGGQFLGGADDTIR	[R].VFIGGQFLGGADDTIR.[A]	1xLabel:13C(6)15N(4) [R16]	1xLabel:13C(6)15N(4) [R16]			1.04295e-05	0	1	1	2	TGGT1_279400-t26_1-p1	transcript=TGGT1_279400-t26_1 | gene=TGGT1_279400 | organism=Toxoplasma_gondii_GT1 | gene_product=putative glutaredoxin | transcript_product=putative glutaredoxin | location=TGGT1_chrIX:38768-40339(+) | protein_length=146 | sequence_SO=chromosome | SO=protein_coding	TGGT1_279400-t26_1-p1 [114-129]	0	1675.87	16
FALSE	High	TEGALDAANLLKPMLAR	[K].TEGALDAANLLKPMLAR.[G]					9.0348e-05	0	1	1	1	TGGT1_257990-t26_1-p1	transcript=TGGT1_257990-t26_1 | gene=TGGT1_257990 | organism=Toxoplasma_gondii_GT1 | gene_product=putative heat shock protein 101 | transcript_product=putative heat shock protein 101 | location=TGGT1_chrVIIb:3637480-3646383(+) | protein_length=927 | sequence_SO=chromosome | SO=protein_coding	TGGT1_257990-t26_1-p1 [287-303]	0	1783.97	17	0.999	1.781	0	0.83	0.565606	0.351671	0.815994	0.600458	101.27	59.96	0.999	1.683	0.103	1.06	1.781	100	0	0.75	-3.28	0.08	0.83	6.64	7866.22	4058.33	5594.28	13537.7	33.85	107.93	54.78	164.23	4061.89
FALSE	High	VFMSEKEPTDETMLDLQR	[K].VFMSEKEPTDETMLDLQR.[E]					2.45563e-07	0	1	1	10	TGGT1_205250-t26_1-p1	transcript=TGGT1_205250-t26_1 | gene=TGGT1_205250 | organism=Toxoplasma_gondii_GT1 | gene_product=rhoptry protein ROP18 | transcript_product=rhoptry protein ROP18 | location=TGGT1_chrVIIa:1426782-1428446(-) | protein_length=554 | sequence_SO=chromosome | SO=protein_coding	TGGT1_205250-t26_1-p1 [282-299]	1	2169.02	18	1.147	0.089	0.2	-3.5	0.849357	0.138727	0.943784	0.454299	113.86	1.03	0.266	1.147	5.836	0.229	0.089	0.01	-1.91	0.2	2.54	-2.13	-3.5	-6.64	9104.21	7641.88	1069666	94773.6	109.58	25.47	95.57	91.2	28726
FALSE	High	LAADQDILPEEIQR	[K].LAADQDILPEEIQR.[L]					5.78437e-05	0	1	1	2	TGGT1_216790-t26_1-p1	transcript=TGGT1_216790-t26_1 | gene=TGGT1_216790 | organism=Toxoplasma_gondii_GT1 | gene_product=putative ATP-binding cassette sub-family E member 1 | transcript_product=putative ATP-binding cassette sub-family E member 1 | location=TGGT1_chrXI:5800419-5807047(-) | protein_length=613 | sequence_SO=chromosome | SO=protein_coding	TGGT1_216790-t26_1-p1 [344-357]	0	1610.84	14
FALSE	High	EVGFPTTASAPHSILEAFK	[R].EVGFPTTASAPHSILEAFK.[F]	1xLabel:13C(6)15N(2) [K19]	1xLabel:13C(6)15N(2) [K19]			1.83403e-06	0	1	1	8	TGGT1_218410-t26_1-p1	transcript=TGGT1_218410-t26_1 | gene=TGGT1_218410 | organism=Toxoplasma_gondii_GT1 | gene_product=ribosomal protein RPP0 | transcript_product=ribosomal protein RPP0 | location=TGGT1_chrXII:1471598-1473146(+) | protein_length=314 | sequence_SO=chromosome | SO=protein_coding	TGGT1_218410-t26_1-p1 [229-247]	0	2010.04	19	0.757	0.682	-0.4	-0.55	0.154601	0.0191316	0.599678	0.20435	15.24	5.94	0.757	0.944	0.621	0.682	0.741	0.613	-0.4	-0.08	-0.69	-0.55	-0.43	-0.7	154336	116774	3.19496e+06	2289896	49.28	30.74	82.28	73.36	154336
FALSE	High	MDSQQQLSPAVDSAVGSR	[-].MDSQQQLSPAVDSAVGSR.[V]	1xAcetyl [N-Term]	1xAcetyl [N-Term]	TGGT1_226250-t26_1-p1 1xAcetyl [N-Term]	TGGT1_226250-t26_1-p1 1xAcetyl [N-Term]	4.98979e-05	0	1	1	2	TGGT1_226250-t26_1-p1	transcript=TGGT1_226250-t26_1 | gene=TGGT1_226250 | organism=Toxoplasma_gondii_GT1 | gene_product=DEAD (Asp-Glu-Ala-Asp) box polypeptide DDX3X | transcript_product=DEAD (Asp-Glu-Ala-Asp) box polypeptide DDX3X | location=TGGT1_chrX:1667417-1670378(+) | protein_length=734 | sequence_SO=chromosome | SO=protein_coding	TGGT1_226250-t26_1-p1 [1-18]	0	1917.9	18	0.787	0.305	-0.35	-1.72	0.553344	0.361418	0.812646	0.602441	57.6	12.42	1.554	0.787	0.293	0.305	1.74	0.03	0.64	-0.35	-1.77	-1.72	0.8	-5.08	11711.7	10547.1	10259.1	10548.7	30.54	50.93	160.71	59.18	7072.83
FALSE	High	EVGFPTTASAPHSILEAFK	[R].EVGFPTTASAPHSILEAFK.[F]					2.36763e-06	0	1	1	7	TGGT1_218410-t26_1-p1	transcript=TGGT1_218410-t26_1 | gene=TGGT1_218410 | organism=Toxoplasma_gondii_GT1 | gene_product=ribosomal protein RPP0 | transcript_product=ribosomal protein RPP0 | location=TGGT1_chrXII:1471598-1473146(+) | protein_length=314 | sequence_SO=chromosome | SO=protein_coding	TGGT1_218410-t26_1-p1 [229-247]	0	2002.03	19
FALSE	High	LPENQPNIYYAAGESAEQLMK	[K].LPENQPNIYYAAGESAEQLMK.[A]					9.85887e-07	0	1	1	6	TGGT1_244560-t26_1-p1	transcript=TGGT1_244560-t26_1 | gene=TGGT1_244560 | organism=Toxoplasma_gondii_GT1 | gene_product=putative heat shock protein 90 | transcript_product=putative heat shock protein 90 | location=TGGT1_chrVI:3273039-3276701(+) | protein_length=853 | sequence_SO=chromosome | SO=protein_coding	TGGT1_244560-t26_1-p1 [585-605]	0	2366.13	21	0.023	0.543	-5.41	-0.88	0.0206376	0.0392004	0.286492	0.244326	0.05	5.45	0.052	0.01	0.023	0.543	0.706	0.476	-4.27	-6.64	-5.41	-0.88	-0.5	-1.07	218610	4047.9	1005041	546183	21.27	99.27	106.79	94	265412
FALSE	High	EVLMNVATTTISSK	[R].EVLMNVATTTISSK.[L]					2.94877e-05	0	1	1	6	TGGT1_229990-t26_1-p1	transcript=TGGT1_229990-t26_1 | gene=TGGT1_229990 | organism=Toxoplasma_gondii_GT1 | gene_product=putative T-complex protein 1 subunit alpha | transcript_product=putative T-complex protein 1 subunit alpha | location=TGGT1_chrVIII:493249-499968(-) | protein_length=548 | sequence_SO=chromosome | SO=protein_coding	TGGT1_229990-t26_1-p1 [144-157]	0	1493.79	14	1.589	1.127	0.67	0.17	0.828766	0.0742288	0.935358	0.326795	37.34	2.15	1.989	0.18	1.589	1.127	1.111	1.282	0.99	-2.48	0.67	0.17	0.15	0.36	3976.37	2304.52	428463	482938	97.86	77.75	83.73	91.53	3976.37
FALSE	High	EVMSPSWATYASQVIR	[K].EVMSPSWATYASQVIR.[N]	1xLabel:13C(6)15N(4) [R16]	1xLabel:13C(6)15N(4) [R16]			4.84693e-05	0	1	1	2	TGGT1_234190-t26_1-p1	transcript=TGGT1_234190-t26_1 | gene=TGGT1_234190 | organism=Toxoplasma_gondii_GT1 | gene_product=putative serine hydroxymethyltransferase 2 | transcript_product=putative serine hydroxymethyltransferase 2 | location=TGGT1_chrX:4074410-4078362(-) | protein_length=595 | sequence_SO=chromosome | SO=protein_coding	TGGT1_234190-t26_1-p1 [435-450]	0	1834.9	16
FALSE	High	EVMSPSWATYASQVIR	[K].EVMSPSWATYASQVIR.[N]					7.41898e-06	0	1	1	4	TGGT1_234190-t26_1-p1	transcript=TGGT1_234190-t26_1 | gene=TGGT1_234190 | organism=Toxoplasma_gondii_GT1 | gene_product=putative serine hydroxymethyltransferase 2 | transcript_product=putative serine hydroxymethyltransferase 2 | location=TGGT1_chrX:4074410-4078362(-) | protein_length=595 | sequence_SO=chromosome | SO=protein_coding	TGGT1_234190-t26_1-p1 [435-450]	0	1824.89	16	0.398	0.769	-1.33	-0.38	0.15611	0.0157702	0.599723	0.20435	4.62	0.13	0.057	0.398	0.476	0.84	0.768	0.769	-4.12	-1.33	-1.07	-0.25	-0.38	-0.38	8094.73	1362.12	556509	427561	60.96	117.26	95.08	92.93	8094.73
FALSE	High	MDPTLLLQEPLDIVR	[-].MDPTLLLQEPLDIVR.[V]	1xAcetyl [N-Term]	1xAcetyl [N-Term]	TGGT1_298970-t26_1-p1 1xAcetyl [N-Term]	TGGT1_298970-t26_1-p1 1xAcetyl [N-Term]	6.25318e-05	0	1	1	1	TGGT1_298970-t26_1-p1	transcript=TGGT1_298970-t26_1 | gene=TGGT1_298970 | organism=Toxoplasma_gondii_GT1 | gene_product=LSM3, U6 small nuclear RNA associated isoform 2 family protein | transcript_product=LSM3, U6 small nuclear RNA associated isoform 2 family protein | location=TGGT1_chrIII:2271735-2273392(+) | protein_length=96 | sequence_SO=chromosome | SO=protein_coding	TGGT1_298970-t26_1-p1 [1-15]	0	1794.97	15
FALSE	High	KYEDVCPTSHNMEVPNVK	[K].KYEDVCPTSHNMEVPNVK.[R]					1.68269e-06	0	1	1	3	TGGT1_251810-t26_1-p1	transcript=TGGT1_251810-t26_1 | gene=TGGT1_251810 | organism=Toxoplasma_gondii_GT1 | gene_product=putative translation initiation factor eIF-5A | transcript_product=putative translation initiation factor eIF-5A | location=TGGT1_chrXII:5518720-5519205(-) | protein_length=161 | sequence_SO=chromosome | SO=protein_coding	TGGT1_251810-t26_1-p1 [70-87]	1	2089.97	18	0.548	0.042	-0.87	-4.59	0.596688	0.132554	0.831549	0.44448	43.22	0.08	0.016	4.996	0.548	0.029	0.042	0.628	-5.96	2.32	-0.87	-5.13	-4.59	-0.67	11823.8	4850.18	244551	10178.8	161.12	23.08	78.78	164.81	259771
FALSE	High	MDQAATSAAASQR	[-].MDQAATSAAASQR.[G]	1xAcetyl [N-Term]	1xAcetyl [N-Term]	TGGT1_237140-t26_1-p1 1xAcetyl [N-Term]	TGGT1_237140-t26_1-p1 1xAcetyl [N-Term]	5.01885e-05	0	1	1	1	TGGT1_237140-t26_1-p1	transcript=TGGT1_237140-t26_1 | gene=TGGT1_237140 | organism=Toxoplasma_gondii_GT1 | gene_product=putative ethylene inducible protein | transcript_product=putative ethylene inducible protein | location=TGGT1_chrX:5625979-5630291(+) | protein_length=307 | sequence_SO=chromosome | SO=protein_coding	TGGT1_237140-t26_1-p1 [1-13]	0	1349.61	13	7.556	11.626	2.92	3.54	0.759239	0.152011	0.904749	0.469084	147.59	127.26	7.556	0.034	36.006	11.626	1.647	59.458	2.92	-4.88	5.17	3.54	0.72	5.89	5612.62	42409.2	12750.7	253146	164.48	76.61	144.13	47.03	5612.62
FALSE	High	KYEDVCPTSHNMEVPNVK	[K].KYEDVCPTSHNMEVPNVK.[R]	2xLabel:13C(6)15N(2) [K1; K18]	2xLabel:13C(6)15N(2) [K1; K18]			0.000190803	0	1	1	3	TGGT1_251810-t26_1-p1	transcript=TGGT1_251810-t26_1 | gene=TGGT1_251810 | organism=Toxoplasma_gondii_GT1 | gene_product=putative translation initiation factor eIF-5A | transcript_product=putative translation initiation factor eIF-5A | location=TGGT1_chrXII:5518720-5519205(-) | protein_length=161 | sequence_SO=chromosome | SO=protein_coding	TGGT1_251810-t26_1-p1 [70-87]	1	2106	18
FALSE	High	EVLYDAFDLPYR	[R].EVLYDAFDLPYR.[G]	1xLabel:13C(6)15N(4) [R12]	1xLabel:13C(6)15N(4) [R12]			6.54794e-05	0	1	1	3	TGGT1_249780-t26_1-p1	transcript=TGGT1_249780-t26_1 | gene=TGGT1_249780 | organism=Toxoplasma_gondii_GT1 | gene_product=hypothetical protein | transcript_product=hypothetical protein | location=TGGT1_chrXII:4731604-4732590(-) | protein_length=328 | sequence_SO=chromosome | SO=protein_coding	TGGT1_249780-t26_1-p1 [194-205]	0	1510.75	12	1.898	0.795	0.92	-0.33	0.00951925	0.178893	0.238541	0.497416	7.76	4.95	1.637	1.898	1.998	0.795	0.994	0.753	0.71	0.92	1	-0.33	-0.01	-0.41	4413.07	7222.69	403725	401374	50.34	49.28	101.91	92.53	4413.07
FALSE	High	EVLYDAFDLPYR	[R].EVLYDAFDLPYR.[G]					0.000136697	0	1	1	5	TGGT1_249780-t26_1-p1	transcript=TGGT1_249780-t26_1 | gene=TGGT1_249780 | organism=Toxoplasma_gondii_GT1 | gene_product=hypothetical protein | transcript_product=hypothetical protein | location=TGGT1_chrXII:4731604-4732590(-) | protein_length=328 | sequence_SO=chromosome | SO=protein_coding	TGGT1_249780-t26_1-p1 [194-205]	0	1500.74	12
FALSE	High	MDQAATSAAASQR	[-].MDQAATSAAASQR.[G]	1xAcetyl [N-Term]; 1xLabel:13C(6)15N(4) [R13]	1xAcetyl [N-Term]; 1xLabel:13C(6)15N(4) [R13]	TGGT1_237140-t26_1-p1 1xAcetyl [N-Term]	TGGT1_237140-t26_1-p1 1xAcetyl [N-Term]	0.000125683	0	1	1	2	TGGT1_237140-t26_1-p1	transcript=TGGT1_237140-t26_1 | gene=TGGT1_237140 | organism=Toxoplasma_gondii_GT1 | gene_product=putative ethylene inducible protein | transcript_product=putative ethylene inducible protein | location=TGGT1_chrX:5625979-5630291(+) | protein_length=307 | sequence_SO=chromosome | SO=protein_coding	TGGT1_237140-t26_1-p1 [1-13]	0	1359.62	13
FALSE	High	LPENQPNIYYAAGESAEQLMK	[K].LPENQPNIYYAAGESAEQLMK.[A]	1xOxidation [M20]; 1xLabel:13C(6)15N(2) [K21]	1xOxidation [M20]; 1xLabel:13C(6)15N(2) [K21]			2.69004e-06	0	1	1	3	TGGT1_244560-t26_1-p1	transcript=TGGT1_244560-t26_1 | gene=TGGT1_244560 | organism=Toxoplasma_gondii_GT1 | gene_product=putative heat shock protein 90 | transcript_product=putative heat shock protein 90 | location=TGGT1_chrVI:3273039-3276701(+) | protein_length=853 | sequence_SO=chromosome | SO=protein_coding	TGGT1_244560-t26_1-p1 [585-605]	0	2390.14	21
FALSE	High	SAEEGSEADLER	[K].SAEEGSEADLER.[A]					6.68103e-05	0	1	1	4	TGGT1_290950-t26_1-p1	transcript=TGGT1_290950-t26_1 | gene=TGGT1_290950 | organism=Toxoplasma_gondii_GT1 | gene_product=putative clathrin heavy chain | transcript_product=putative clathrin heavy chain | location=TGGT1_chrIX:3770246-3782423(-) | protein_length=1731 | sequence_SO=chromosome | SO=protein_coding	TGGT1_290950-t26_1-p1 [1120-1131]	0	1292.56	12	0.119	0.865	-3.07	-0.21	0.127418	0.243578	0.574638	0.541859	0.55	16.09	0.088	0.119	0.703	0.865	1.008	0.739	-3.51	-3.07	-0.51	-0.21	0.01	-0.44	250892	29848.4	351934	304388	96.77	63.97	30.91	15.45	517605
FALSE	High	VFFDISIDKKPAGR	[R].VFFDISIDKKPAGR.[I]	2xLabel:13C(6)15N(2) [K9; K10]; 1xLabel:13C(6)15N(4) [R14]	2xLabel:13C(6)15N(2) [K9; K10]; 1xLabel:13C(6)15N(4) [R14]			2.1266e-05	0	1	1	3	TGGT1_205700-t26_1-p1	transcript=TGGT1_205700-t26_1 | gene=TGGT1_205700 | organism=Toxoplasma_gondii_GT1 | gene_product=cyclophilin precursor | transcript_product=cyclophilin precursor | location=TGGT1_chrVIIa:1122121-1123167(+) | protein_length=348 | sequence_SO=chromosome | SO=protein_coding	TGGT1_205700-t26_1-p1 [182-195]	1	1618.92	14	0.214	0.68	-2.22	-0.56	0.281517	0.246766	0.692512	0.544258	4.57	3.76	0.214	1.42	0.07	0.68	0.123	0.717	-2.22	0.51	-3.84	-0.56	-3.02	-0.48	13124.5	9665.6	438535	298242	108.59	78.85	88.28	112.27	59394.9
FALSE	High	MDSIAAADAAIR	[K].MDSIAAADAAIR.[G]					9.665e-05	0	1	1	9	TGGT1_321500-t26_1-p1	transcript=TGGT1_321500-t26_1 | gene=TGGT1_321500 | organism=Toxoplasma_gondii_GT1 | gene_product=RNA recognition motif-containing protein | transcript_product=RNA recognition motif-containing protein | location=TGGT1_chrIb:1771014-1773404(+) | protein_length=475 | sequence_SO=chromosome | SO=protein_coding	TGGT1_321500-t26_1-p1 [85-96]	0	1204.6	12	0.9	0.821	-0.15	-0.28	0.708809	0.124301	0.879612	0.43191	99.28	8.88	2.506	0.9	0.155	0.821	0.951	0.748	1.33	-0.15	-2.69	-0.28	-0.07	-0.42	12010.7	10806.6	1.32995e+06	1.26492e+06	6.77	105.52	74.22	64.12	13117.9
FALSE	High	MDSIAAADAAIR	[K].MDSIAAADAAIR.[G]	1xLabel:13C(6)15N(4) [R12]	1xLabel:13C(6)15N(4) [R12]			0.000108347	0	1	1	9	TGGT1_321500-t26_1-p1	transcript=TGGT1_321500-t26_1 | gene=TGGT1_321500 | organism=Toxoplasma_gondii_GT1 | gene_product=RNA recognition motif-containing protein | transcript_product=RNA recognition motif-containing protein | location=TGGT1_chrIb:1771014-1773404(+) | protein_length=475 | sequence_SO=chromosome | SO=protein_coding	TGGT1_321500-t26_1-p1 [85-96]	0	1214.61	12
FALSE	High	EVIPAHEADEEDADDTK	[R].EVIPAHEADEEDADDTK.[K]					9.91149e-05	0	1	1	7	TGGT1_227970-t26_1-p1	transcript=TGGT1_227970-t26_1 | gene=TGGT1_227970 | organism=Toxoplasma_gondii_GT1 | gene_product=histone family DNA-binding protein | transcript_product=histone family DNA-binding protein | location=TGGT1_chrX:610022-611286(+) | protein_length=235 | sequence_SO=chromosome | SO=protein_coding	TGGT1_227970-t26_1-p1 [211-227]	0	1883.81	17
FALSE	High	LPENQPNIYYAAGESAEQLMK	[K].LPENQPNIYYAAGESAEQLMK.[A]	1xLabel:13C(6)15N(2) [K21]	1xLabel:13C(6)15N(2) [K21]			1.31116e-06	0	1	1	6	TGGT1_244560-t26_1-p1	transcript=TGGT1_244560-t26_1 | gene=TGGT1_244560 | organism=Toxoplasma_gondii_GT1 | gene_product=putative heat shock protein 90 | transcript_product=putative heat shock protein 90 | location=TGGT1_chrVI:3273039-3276701(+) | protein_length=853 | sequence_SO=chromosome | SO=protein_coding	TGGT1_244560-t26_1-p1 [585-605]	0	2374.15	21
FALSE	High	SAATQGLNAFNSDAVR	[K].SAATQGLNAFNSDAVR.[K]	1xLabel:13C(6)15N(4) [R16]	1xLabel:13C(6)15N(4) [R16]			6.28932e-05	0	1	1	1	TGGT1_243930-t26_1-p1	transcript=TGGT1_243930-t26_1 | gene=TGGT1_243930 | organism=Toxoplasma_gondii_GT1 | gene_product=hypothetical protein | transcript_product=hypothetical protein | location=TGGT1_chrVI:2808395-2813397(-) | protein_length=943 | sequence_SO=chromosome | SO=protein_coding	TGGT1_243930-t26_1-p1 [245-260]	0	1631.8	16
FALSE	High	LAADQDILPEEIQR	[K].LAADQDILPEEIQR.[L]	1xLabel:13C(6)15N(4) [R14]	1xLabel:13C(6)15N(4) [R14]			0.000154122	0	1	1	1	TGGT1_216790-t26_1-p1	transcript=TGGT1_216790-t26_1 | gene=TGGT1_216790 | organism=Toxoplasma_gondii_GT1 | gene_product=putative ATP-binding cassette sub-family E member 1 | transcript_product=putative ATP-binding cassette sub-family E member 1 | location=TGGT1_chrXI:5800419-5807047(-) | protein_length=613 | sequence_SO=chromosome | SO=protein_coding	TGGT1_216790-t26_1-p1 [344-357]	0	1620.85	14	0.714	1.254	-0.49	0.33	0.686432	0.416007	0.870055	0.617198	27.05	49.65	0.458	0.714	1.757	9.201	1.254	0.834	-1.13	-0.49	0.81	3.2	0.33	-0.26	8230.26	5874.52	5441.84	8073.3	30.31	40.88	171.74	169.09	11051.3
FALSE	High	MEAVDISEAEK	[R].MEAVDISEAEK.[Y]					0.000156575	0	1	1	11	TGGT1_290670-t26_1-p1	transcript=TGGT1_290670-t26_1 | gene=TGGT1_290670 | organism=Toxoplasma_gondii_GT1 | gene_product=leucyl aminopeptidase LAP | transcript_product=leucyl aminopeptidase LAP | location=TGGT1_chrIX:3637150-3642271(+) | protein_length=781 | sequence_SO=chromosome | SO=protein_coding	TGGT1_290670-t26_1-p1 [249-259]	0	1221.57	11	1.274	3.435	0.35	1.78	0.730443	0.285413	0.891221	0.570868	123.4	21.61	1.274	16.404	0.214	3.435	3.935	0.746	0.35	4.04	-2.23	1.78	1.98	-0.42	9512.9	11299.3	150217	591153	83.08	58.21	133.79	52.9	9512.9
FALSE	High	MEDTAQSTPTTAVSAK	[-].MEDTAQSTPTTAVSAK.[K]	1xAcetyl [N-Term]; 1xLabel:13C(6)15N(2) [K16]	1xAcetyl [N-Term]; 1xLabel:13C(6)15N(2) [K16]	TGGT1_306895-t26_1-p1 1xAcetyl [N-Term]	TGGT1_306895-t26_1-p1 1xAcetyl [N-Term]	0.000179136	0	1	1	2	TGGT1_306895-t26_1-p1	transcript=TGGT1_306895-t26_1 | gene=TGGT1_306895 | organism=Toxoplasma_gondii_GT1 | gene_product=hypothetical protein | transcript_product=hypothetical protein | location=TGGT1_chrXI:186031-186540(-) | protein_length=169 | sequence_SO=chromosome | SO=protein_coding	TGGT1_306895-t26_1-p1 [1-16]	0	1687.79	16	0.498	0.847	-1.01	-0.24	0.542033	0.358977	0.806203	0.601934	29.93	18.9	2.625	0.093	0.498	1.081	0.847	0.697	1.39	-3.43	-1.01	0.11	-0.24	-0.52	4784.88	2064.94	9455.84	8010.63	36.84	126.35	165.33	162.71	4784.88
FALSE	High	EVDEQMLNVQNK	[K].EVDEQMLNVQNK.[N]	1xOxidation [M6]; 1xLabel:13C(6)15N(2) [K12]	1xOxidation [M6]; 1xLabel:13C(6)15N(2) [K12]			3.44487e-05	0	2	3	17	TGGT1_221620-t26_1-p1; TGGT1_266960-t26_1-p1	transcript=TGGT1_221620-t26_1 | gene=TGGT1_221620 | organism=Toxoplasma_gondii_GT1 | gene_product=putative beta-tubulin | transcript_product=putative beta-tubulin | location=TGGT1_chrII:472166-474503(-) | protein_length=449 | sequence_SO=chromosome | SO=protein_coding transcript=TGGT1_266960-t26_1 | gene=TGGT1_266960 | organism=Toxoplasma_gondii_GT1 | gene_product=beta-tubulin | transcript_produc…	TGGT1_221620-t26_1-p1 [325-336]; TGGT1_266960-t26_1-p1 [325-336]	0	1470.7	12
FALSE	High	EVDEQMLNVQNK	[K].EVDEQMLNVQNK.[N]	1xOxidation [M6]	1xOxidation [M6]			2.44268e-05	0	2	3	24	TGGT1_221620-t26_1-p1; TGGT1_266960-t26_1-p1	transcript=TGGT1_221620-t26_1 | gene=TGGT1_221620 | organism=Toxoplasma_gondii_GT1 | gene_product=putative beta-tubulin | transcript_product=putative beta-tubulin | location=TGGT1_chrII:472166-474503(-) | protein_length=449 | sequence_SO=chromosome | SO=protein_coding transcript=TGGT1_266960-t26_1 | gene=TGGT1_266960 | organism=Toxoplasma_gondii_GT1 | gene_product=beta-tubulin | transcript_produc…	TGGT1_221620-t26_1-p1 [325-336]; TGGT1_266960-t26_1-p1 [325-336]	0	1462.68	12	0.645	0.687	-0.63	-0.54	0.00206144	0.286538	0.205517	0.571504	0.45	22.83	0.681	0.645	0.64	0.687	0.911	0.171	-0.56	-0.63	-0.64	-0.54	-0.13	-2.55	626323	405012	1.16302e+06	797601	47.32	48.57	35.21	48.74	626323
FALSE	High	EVDEQMLNVQNK	[K].EVDEQMLNVQNK.[N]	1xLabel:13C(6)15N(2) [K12]	1xLabel:13C(6)15N(2) [K12]			1.46132e-05	0	2	3	14	TGGT1_221620-t26_1-p1; TGGT1_266960-t26_1-p1	transcript=TGGT1_221620-t26_1 | gene=TGGT1_221620 | organism=Toxoplasma_gondii_GT1 | gene_product=putative beta-tubulin | transcript_product=putative beta-tubulin | location=TGGT1_chrII:472166-474503(-) | protein_length=449 | sequence_SO=chromosome | SO=protein_coding transcript=TGGT1_266960-t26_1 | gene=TGGT1_266960 | organism=Toxoplasma_gondii_GT1 | gene_product=beta-tubulin | transcript_produc…	TGGT1_221620-t26_1-p1 [325-336]; TGGT1_266960-t26_1-p1 [325-336]	0	1454.7	12	0.809	0.617	-0.31	-0.7	0.625769	0.369084	0.845652	0.604293	7.23	7.6	0.809	4.481	0.749	0.617	0.7	0.01	-0.31	2.16	-0.42	-0.7	-0.51	-6.64	6375.47	8915.47	4.86001e+06	2427674	63.47	45.01	46.59	90.11	6375.47
FALSE	High	EVDEQMLNVQNK	[K].EVDEQMLNVQNK.[N]					2.44988e-05	0	2	3	14	TGGT1_221620-t26_1-p1; TGGT1_266960-t26_1-p1	transcript=TGGT1_221620-t26_1 | gene=TGGT1_221620 | organism=Toxoplasma_gondii_GT1 | gene_product=putative beta-tubulin | transcript_product=putative beta-tubulin | location=TGGT1_chrII:472166-474503(-) | protein_length=449 | sequence_SO=chromosome | SO=protein_coding transcript=TGGT1_266960-t26_1 | gene=TGGT1_266960 | organism=Toxoplasma_gondii_GT1 | gene_product=beta-tubulin | transcript_produc…	TGGT1_221620-t26_1-p1 [325-336]; TGGT1_266960-t26_1-p1 [325-336]	0	1446.69	12
FALSE	High	EVDEGEELLHFADVEYPTSISR	[K].EVDEGEELLHFADVEYPTSISR.[G]	1xLabel:13C(6)15N(4) [R22]	1xLabel:13C(6)15N(4) [R22]			9.37132e-05	0	2	2	3	TGGT1_258870B-t26_1-p1; TGGT1_258870A-t26_1-p1	transcript=TGGT1_258870B-t26_1 | gene=TGGT1_258870B | organism=Toxoplasma_gondii_GT1 | gene_product=hypothetical protein | transcript_product=hypothetical protein | location=TGGT1_chrVIIb:3077592-3081353(-) | protein_length=472 | sequence_SO=chromosome | SO=protein_coding transcript=TGGT1_258870A-t26_1 | gene=TGGT1_258870A | organism=Toxoplasma_gondii_GT1 | gene_product=hypothetical protein | tra…	TGGT1_258870B-t26_1-p1 [189-210]; TGGT1_258870A-t26_1-p1 [528-549]	0	2545.2	22
FALSE	High	MEEADLSSLAATER	[-].MEEADLSSLAATER.[Q]	1xAcetyl [N-Term]	1xAcetyl [N-Term]	TGGT1_218780-t26_1-p1 1xAcetyl [N-Term]	TGGT1_218780-t26_1-p1 1xAcetyl [N-Term]	8.86213e-06	0	1	1	7	TGGT1_218780-t26_1-p1	transcript=TGGT1_218780-t26_1 | gene=TGGT1_218780 | organism=Toxoplasma_gondii_GT1 | gene_product=putative phosphoserine aminotransferase | transcript_product=putative phosphoserine aminotransferase | location=TGGT1_chrXII:1247991-1254054(-) | protein_length=481 | sequence_SO=chromosome | SO=protein_coding	TGGT1_218780-t26_1-p1 [1-14]	0	1564.72	14	0.224	0.827	-2.16	-0.27	0.0727073	0.399098	0.461558	0.610711	4.28	18.31	0.224	0.353	0.066	0.976	0.827	0.01	-2.16	-1.5	-3.92	-0.04	-0.27	-6.64	42466.9	9518.99	862608	500763	114.98	59.85	74.82	87.88	42466.9
FALSE	High	MEEADLSSLAATER	[-].MEEADLSSLAATER.[Q]	1xAcetyl [N-Term]; 1xLabel:13C(6)15N(4) [R14]	1xAcetyl [N-Term]; 1xLabel:13C(6)15N(4) [R14]	TGGT1_218780-t26_1-p1 1xAcetyl [N-Term]	TGGT1_218780-t26_1-p1 1xAcetyl [N-Term]	7.77916e-06	0	1	1	5	TGGT1_218780-t26_1-p1	transcript=TGGT1_218780-t26_1 | gene=TGGT1_218780 | organism=Toxoplasma_gondii_GT1 | gene_product=putative phosphoserine aminotransferase | transcript_product=putative phosphoserine aminotransferase | location=TGGT1_chrXII:1247991-1254054(-) | protein_length=481 | sequence_SO=chromosome | SO=protein_coding	TGGT1_218780-t26_1-p1 [1-14]	0	1574.72	14
FALSE	High	VFTIVYTSGTTGNPK	[R].VFTIVYTSGTTGNPK.[G]	1xLabel:13C(6)15N(2) [K15]	1xLabel:13C(6)15N(2) [K15]			5.15167e-05	0	1	1	1	TGGT1_310150-t26_1-p1	transcript=TGGT1_310150-t26_1 | gene=TGGT1_310150 | organism=Toxoplasma_gondii_GT1 | gene_product=AMP-binding enzyme domain-containing protein | transcript_product=AMP-binding enzyme domain-containing protein | location=TGGT1_chrXI:1055873-1060273(-) | protein_length=866 | sequence_SO=chromosome | SO=protein_coding	TGGT1_310150-t26_1-p1 [375-389]	0	1592.84	15
FALSE	High	LAAGPGGVVGEIR	[K].LAAGPGGVVGEIR.[T]					9.31881e-05	0	1	1	1	TGGT1_258950-t26_1-p1	transcript=TGGT1_258950-t26_1 | gene=TGGT1_258950 | organism=Toxoplasma_gondii_GT1 | gene_product=lectin family protein | transcript_product=lectin family protein | location=TGGT1_chrVIIb:3040792-3044811(+) | protein_length=646 | sequence_SO=chromosome | SO=protein_coding	TGGT1_258950-t26_1-p1 [355-367]	0	1195.68	13
FALSE	High	IAAGPLVEATLK	[R].IAAGPLVEATLK.[A]					7.38582e-05	0	1	1	20	TGGT1_243730-t26_1-p1	transcript=TGGT1_243730-t26_1 | gene=TGGT1_243730 | organism=Toxoplasma_gondii_GT1 | gene_product=rhoptry protein ROP9 | transcript_product=rhoptry protein ROP9 | location=TGGT1_chrVI:2733555-2736099(+) | protein_length=353 | sequence_SO=chromosome | SO=protein_coding	TGGT1_243730-t26_1-p1 [241-252]	0	1182.71	12	0.78	0.81	-0.36	-0.3	0.0154014	0.00696554	0.265017	0.197599	0.46	1.61	0.776	0.78	0.846	0.774	0.81	0.824	-0.37	-0.36	-0.24	-0.37	-0.3	-0.28	328610	272813	4.16949e+06	3.3783e+06	25.73	27.19	58.04	60.38	351753
FALSE	High	IAAGPLVEATLK	[R].IAAGPLVEATLK.[A]	1xLabel:13C(6)15N(2) [K12]	1xLabel:13C(6)15N(2) [K12]			0.000131268	0	1	1	20	TGGT1_243730-t26_1-p1	transcript=TGGT1_243730-t26_1 | gene=TGGT1_243730 | organism=Toxoplasma_gondii_GT1 | gene_product=rhoptry protein ROP9 | transcript_product=rhoptry protein ROP9 | location=TGGT1_chrVI:2733555-2736099(+) | protein_length=353 | sequence_SO=chromosome | SO=protein_coding	TGGT1_243730-t26_1-p1 [241-252]	0	1190.72	12
FALSE	High	EVAAFAQFGSDLDASTR	[R].EVAAFAQFGSDLDASTR.[Q]	1xLabel:13C(6)15N(4) [R17]	1xLabel:13C(6)15N(4) [R17]			9.29266e-05	0	1	1	2	TGGT1_204400-t26_1-p1	transcript=TGGT1_204400-t26_1 | gene=TGGT1_204400 | organism=Toxoplasma_gondii_GT1 | gene_product=putative ATPase synthase subunit alpha | transcript_product=putative ATPase synthase subunit alpha | location=TGGT1_chrVIIa:1716199-1723634(+) | protein_length=577 | sequence_SO=chromosome | SO=protein_coding	TGGT1_204400-t26_1-p1 [451-467]	0	1794.85	17
FALSE	High	ETVYQQGQVLTR	[K].ETVYQQGQVLTR.[E]	1xLabel:13C(6)15N(4) [R12]	1xLabel:13C(6)15N(4) [R12]			0.000202493	0	1	1	2	TGGT1_314820-t26_1-p1	transcript=TGGT1_314820-t26_1 | gene=TGGT1_314820 | organism=Toxoplasma_gondii_GT1 | gene_product=putative atp synthase F1, epsilon subunit | transcript_product=putative atp synthase F1, epsilon subunit | location=TGGT1_chrXI:4263064-4264951(-) | protein_length=73 | sequence_SO=chromosome | SO=protein_coding	TGGT1_314820-t26_1-p1 [42-53]	0	1431.75	12
FALSE	High	ETVYQQGQVLTR	[K].ETVYQQGQVLTR.[E]					9.47716e-05	0	1	1	4	TGGT1_314820-t26_1-p1	transcript=TGGT1_314820-t26_1 | gene=TGGT1_314820 | organism=Toxoplasma_gondii_GT1 | gene_product=putative atp synthase F1, epsilon subunit | transcript_product=putative atp synthase F1, epsilon subunit | location=TGGT1_chrXI:4263064-4264951(-) | protein_length=73 | sequence_SO=chromosome | SO=protein_coding	TGGT1_314820-t26_1-p1 [42-53]	0	1421.74	12	0.372	1.279	-1.43	0.35	0.389994	0.394513	0.736191	0.609873	19.42	28.47	0.372	0.02	1.807	1.279	1.033	100	-1.43	-5.67	0.85	0.35	0.05	6.64	27720	10310.1	358310	502992	148.87	27.35	88.85	16.22	27720
FALSE	High	MEDTAQSTPTTAVSAK	[-].MEDTAQSTPTTAVSAK.[K]	1xAcetyl [N-Term]	1xAcetyl [N-Term]	TGGT1_306895-t26_1-p1 1xAcetyl [N-Term]	TGGT1_306895-t26_1-p1 1xAcetyl [N-Term]	2.5083e-05	0	1	1	3	TGGT1_306895-t26_1-p1	transcript=TGGT1_306895-t26_1 | gene=TGGT1_306895 | organism=Toxoplasma_gondii_GT1 | gene_product=hypothetical protein | transcript_product=hypothetical protein | location=TGGT1_chrXI:186031-186540(-) | protein_length=169 | sequence_SO=chromosome | SO=protein_coding	TGGT1_306895-t26_1-p1 [1-16]	0	1679.78	16
FALSE	High	IAAFIQHALQFEDQQSR	[R].IAAFIQHALQFEDQQSR.[Q]	1xLabel:13C(6)15N(4) [R17]	1xLabel:13C(6)15N(4) [R17]			6.93503e-05	0	1	1	2	TGGT1_254690-t26_1-p1	transcript=TGGT1_254690-t26_1 | gene=TGGT1_254690 | organism=Toxoplasma_gondii_GT1 | gene_product=phospholipase/carboxylesterase | transcript_product=phospholipase/carboxylesterase | location=TGGT1_chrIII:1864196-1866935(+) | protein_length=497 | sequence_SO=chromosome | SO=protein_coding	TGGT1_254690-t26_1-p1 [315-331]	0	2012.02	17
FALSE	High	LPELGILLQDRPDGTFVFK	[K].LPELGILLQDRPDGTFVFK.[R]					0.000137066	0	1	1	1	TGGT1_299810-t26_1-p1	transcript=TGGT1_299810-t26_1 | gene=TGGT1_299810 | organism=Toxoplasma_gondii_GT1 | gene_product=cysteine-tRNA synthetase (CysRS) | transcript_product=cysteine-tRNA synthetase (CysRS) | location=TGGT1_chrXII:289809-302095(-) | protein_length=898 | sequence_SO=chromosome | SO=protein_coding	TGGT1_299810-t26_1-p1 [774-792]	0	2158.19	19	0.805	1.594	-0.31	0.67	0.892894	0.594006	0.960683	0.71222	70.37	53.62	0.215	9.628	0.805	2.171	1.594	0.6	-2.22	3.27	-0.31	1.12	0.67	-0.74	4992.87	5726.19	8608.43	13723.7	76.7	66.72	167.81	157.47	4992.87
FALSE	High	VFTIVYTSGTTGNPK	[R].VFTIVYTSGTTGNPK.[G]					6.43589e-05	0	1	1	2	TGGT1_310150-t26_1-p1	transcript=TGGT1_310150-t26_1 | gene=TGGT1_310150 | organism=Toxoplasma_gondii_GT1 | gene_product=AMP-binding enzyme domain-containing protein | transcript_product=AMP-binding enzyme domain-containing protein | location=TGGT1_chrXI:1055873-1060273(-) | protein_length=866 | sequence_SO=chromosome | SO=protein_coding	TGGT1_310150-t26_1-p1 [375-389]	0	1584.83	15	0.012	0.655	-6.38	-0.61	0.0143477	0.0359598	0.264665	0.239666	0	5.3	0.035	0.012	0.01	0.71	0.655	0.522	-4.82	-6.38	-6.64	-0.49	-0.61	-0.94	718238	8633.53	248863	176695	55.66	31.69	74.71	57.99	369303
FALSE	High	MEAVDISEAEK	[R].MEAVDISEAEK.[Y]	1xLabel:13C(6)15N(2) [K11]	1xLabel:13C(6)15N(2) [K11]			0.00020902	0	1	1	8	TGGT1_290670-t26_1-p1	transcript=TGGT1_290670-t26_1 | gene=TGGT1_290670 | organism=Toxoplasma_gondii_GT1 | gene_product=leucyl aminopeptidase LAP | transcript_product=leucyl aminopeptidase LAP | location=TGGT1_chrIX:3637150-3642271(+) | protein_length=781 | sequence_SO=chromosome | SO=protein_coding	TGGT1_290670-t26_1-p1 [249-259]	0	1229.58	11
FALSE	High	EVGDIGPGYGFQWR	[R].EVGDIGPGYGFQWR.[H]					5.9884e-05	0	1	1	5	TGGT1_249180-t26_1-p1	transcript=TGGT1_249180-t26_1 | gene=TGGT1_249180 | organism=Toxoplasma_gondii_GT1 | gene_product=bifunctional dihydrofolate reductase-thymidylate synthase | transcript_product=bifunctional dihydrofolate reductase-thymidylate synthase | location=TGGT1_chrXII:4294324-4300363(-) | protein_length=610 | sequence_SO=chromosome | SO=protein_coding	TGGT1_249180-t26_1-p1 [421-434]	0	1580.75	14	0.508	0.01	-0.98	-6.64	0.282885	0.0324736	0.692975	0.234377	25.03	0	0.508	0.044	0.84	0.01	0.027	0.01	-0.98	-4.5	-0.25	-6.64	-5.23	-6.64	11756.6	4333.18	502925	2036.17	96.63	73.19	78.74	120.74	8525.29
FALSE	High	IAADVAASEFFLQDDK	[K].IAADVAASEFFLQDDK.[V]					1.82859e-06	0	1	1	6	TGGT1_268850-t26_1-p1	transcript=TGGT1_268850-t26_1 | gene=TGGT1_268850 | organism=Toxoplasma_gondii_GT1 | gene_product=enolase 2 | transcript_product=enolase 2 | location=TGGT1_chrVIII:6248823-6250901(-) | protein_length=475 | sequence_SO=chromosome | SO=protein_coding	TGGT1_268850-t26_1-p1 [280-295]	0	1739.85	16	1.206	0.894	0.27	-0.16	0.567058	0.110002	0.816662	0.404505	71.22	5.85	1.786	0.039	1.206	0.894	0.938	0.795	0.84	-4.67	0.27	-0.16	-0.09	-0.33	185109	7695.81	784401	714049	126.49	169.24	95.93	88.08	4310.03
FALSE	High	IAADVAASEFFLQDDK	[K].IAADVAASEFFLQDDK.[V]	1xLabel:13C(6)15N(2) [K16]	1xLabel:13C(6)15N(2) [K16]			9.26274e-07	0	1	1	6	TGGT1_268850-t26_1-p1	transcript=TGGT1_268850-t26_1 | gene=TGGT1_268850 | organism=Toxoplasma_gondii_GT1 | gene_product=enolase 2 | transcript_product=enolase 2 | location=TGGT1_chrVIII:6248823-6250901(-) | protein_length=475 | sequence_SO=chromosome | SO=protein_coding	TGGT1_268850-t26_1-p1 [280-295]	0	1747.86	16
FALSE	High	MEDGNVSWFLNGK	[R].MEDGNVSWFLNGK.[L]					4.35214e-05	0	1	1	4	TGGT1_266640-t26_1-p1	transcript=TGGT1_266640-t26_1 | gene=TGGT1_266640 | organism=Toxoplasma_gondii_GT1 | gene_product=putative Acetyl-coenzyme A synthetase 2 | transcript_product=putative Acetyl-coenzyme A synthetase 2 | location=TGGT1_chrIX:887254-895827(+) | protein_length=714 | sequence_SO=chromosome | SO=protein_coding	TGGT1_266640-t26_1-p1 [119-131]	0	1496.68	13	14.354	0.855	3.84	-0.23	0.0209959	0.0695	0.286527	0.315487	76.95	2.21	14.354	26.226	6.904	0.855	0.837	0.943	3.84	4.71	2.79	-0.23	-0.26	-0.09	2604.23	63597.7	690029	577807	52.95	68.36	63.47	69.83	4430.58
FALSE	High	MEDGNVSWFLNGK	[R].MEDGNVSWFLNGK.[L]	1xLabel:13C(6)15N(2) [K13]	1xLabel:13C(6)15N(2) [K13]			0.000110467	0	1	1	3	TGGT1_266640-t26_1-p1	transcript=TGGT1_266640-t26_1 | gene=TGGT1_266640 | organism=Toxoplasma_gondii_GT1 | gene_product=putative Acetyl-coenzyme A synthetase 2 | transcript_product=putative Acetyl-coenzyme A synthetase 2 | location=TGGT1_chrIX:887254-895827(+) | protein_length=714 | sequence_SO=chromosome | SO=protein_coding	TGGT1_266640-t26_1-p1 [119-131]	0	1504.7	13
FALSE	High	VFSGTVATGQK	[R].VFSGTVATGQK.[V]	1xLabel:13C(6)15N(2) [K11]	1xLabel:13C(6)15N(2) [K11]			0.000216717	0	1	1	17	TGGT1_205470-t26_1-p1	transcript=TGGT1_205470-t26_1 | gene=TGGT1_205470 | organism=Toxoplasma_gondii_GT1 | gene_product=putative translation elongation factor 2 family protein | transcript_product=putative translation elongation factor 2 family protein | location=TGGT1_chrVIIa:1297616-1301283(+) | protein_length=832 | sequence_SO=chromosome | SO=protein_coding	TGGT1_205470-t26_1-p1 [390-400]	0	1102.6	11
FALSE	High	SAEEGSEADLER	[K].SAEEGSEADLER.[A]	1xLabel:13C(6)15N(4) [R12]	1xLabel:13C(6)15N(4) [R12]			7.75289e-05	0	1	1	5	TGGT1_290950-t26_1-p1	transcript=TGGT1_290950-t26_1 | gene=TGGT1_290950 | organism=Toxoplasma_gondii_GT1 | gene_product=putative clathrin heavy chain | transcript_product=putative clathrin heavy chain | location=TGGT1_chrIX:3770246-3782423(-) | protein_length=1731 | sequence_SO=chromosome | SO=protein_coding	TGGT1_290950-t26_1-p1 [1120-1131]	0	1302.57	12
FALSE	High	IAADVAASEFFLQDDKVYDLDFK	[K].IAADVAASEFFLQDDKVYDLDFK.[T]					4.70805e-05	0	1	1	4	TGGT1_268850-t26_1-p1	transcript=TGGT1_268850-t26_1 | gene=TGGT1_268850 | organism=Toxoplasma_gondii_GT1 | gene_product=enolase 2 | transcript_product=enolase 2 | location=TGGT1_chrVIII:6248823-6250901(-) | protein_length=475 | sequence_SO=chromosome | SO=protein_coding	TGGT1_268850-t26_1-p1 [280-302]	1	2620.28	23	100	0.813	6.64	-0.3	0.0148122	0.113121	0.265017	0.411473	0	6.13	100	70.178	100	0.813	0.864	0.62	6.64	6.13	6.64	-0.3	-0.21	-0.69	5664.82	1.65376e+06	671528	546044	50.87	76.79	96.12	79.04	4651.08
FALSE	High	MEDLLELFR	[K].MEDLLELFR.[A]	1xLabel:13C(6)15N(4) [R9]	1xLabel:13C(6)15N(4) [R9]			0.00020299	0	1	1	7	TGGT1_213350-t26_1-p1	transcript=TGGT1_213350-t26_1 | gene=TGGT1_213350 | organism=Toxoplasma_gondii_GT1 | gene_product=ribosomal protein RPS15 | transcript_product=ribosomal protein RPS15 | location=TGGT1_chrV:820008-821446(-) | protein_length=150 | sequence_SO=chromosome | SO=protein_coding	TGGT1_213350-t26_1-p1 [35-43]	0	1175.6	9
FALSE	High	EVEQQQDTLASQIQR	[R].EVEQQQDTLASQIQR.[V]					0.000123981	0	1	1	2	TGGT1_254520-t26_1-p1	transcript=TGGT1_254520-t26_1 | gene=TGGT1_254520 | organism=Toxoplasma_gondii_GT1 | gene_product=mediator complex subunit MED11 | transcript_product=mediator complex subunit MED11 | location=TGGT1_chrIII:1782437-1785137(+) | protein_length=153 | sequence_SO=chromosome | SO=protein_coding	TGGT1_254520-t26_1-p1 [26-40]	0	1772.88	15	0.321	1.094	-1.64	0.13	0.232465	0.490899	0.658396	0.64637	1.98	31.11	0.279	0.321	1.143	1.902	1.094	0.864	-1.84	-1.64	0.19	0.93	0.13	-0.21	7674.66	2141.32	9447.96	12032.3	48.3	118.54	158.63	150.12	7674.66
FALSE	High	MEDLLELFR	[K].MEDLLELFR.[A]	1xOxidation [M1]	1xOxidation [M1]			0.000133778	0	1	1	8	TGGT1_213350-t26_1-p1	transcript=TGGT1_213350-t26_1 | gene=TGGT1_213350 | organism=Toxoplasma_gondii_GT1 | gene_product=ribosomal protein RPS15 | transcript_product=ribosomal protein RPS15 | location=TGGT1_chrV:820008-821446(-) | protein_length=150 | sequence_SO=chromosome | SO=protein_coding	TGGT1_213350-t26_1-p1 [35-43]	0	1181.59	9	0.854	0.89	-0.23	-0.17	0.394101	0.213625	0.736918	0.521535	18.28	9.38	0.854	0.999	0.044	0.961	0.89	0.704	-0.23	0	-4.52	-0.06	-0.17	-0.51	275759	232419	814868	725587	39.96	99.93	60.26	43.25	272076
FALSE	High	EVEQLALEVGSGILSLPDAAPK	[R].EVEQLALEVGSGILSLPDAAPK.[L]					1.60631e-05	0	1	1	2	TGGT1_243800-t26_1-p1	transcript=TGGT1_243800-t26_1 | gene=TGGT1_243800 | organism=Toxoplasma_gondii_GT1 | gene_product=putative long-chain fatty acid CoA ligase | transcript_product=putative long-chain fatty acid CoA ligase | location=TGGT1_chrVI:2778396-2788707(-) | protein_length=758 | sequence_SO=chromosome | SO=protein_coding	TGGT1_243800-t26_1-p1 [89-110]	0	2236.21	22
FALSE	High	EVEMGVVNPNYQ	[R].EVEMGVVNPNYQ.[-]					6.54794e-05	0	1	1	13	TGGT1_219270-t26_1-p1	transcript=TGGT1_219270-t26_1 | gene=TGGT1_219270 | organism=Toxoplasma_gondii_GT1 | gene_product=multi-pass transmembrane protein | transcript_product=multi-pass transmembrane protein | location=TGGT1_chrXII:948336-949904(+) | protein_length=389 | sequence_SO=chromosome | SO=protein_coding	TGGT1_219270-t26_1-p1 [378-389]	0	1378.63	12
FALSE	High	EVELEMQALAEQHNFMK	[R].EVELEMQALAEQHNFMK.[K]	1xLabel:13C(6)15N(2) [K17]	1xLabel:13C(6)15N(2) [K17]			9.71928e-05	0	1	1	1	TGGT1_310010-t26_1-p1	transcript=TGGT1_310010-t26_1 | gene=TGGT1_310010 | organism=Toxoplasma_gondii_GT1 | gene_product=rhoptry neck protein RON1 | transcript_product=rhoptry neck protein RON1 | location=TGGT1_chrXI:969238-974493(+) | protein_length=1158 | sequence_SO=chromosome | SO=protein_coding	TGGT1_310010-t26_1-p1 [272-288]	0	2054.98	17
FALSE	High	EVELEMQALAEQHNFMK	[R].EVELEMQALAEQHNFMK.[K]					5.10702e-05	0	1	1	1	TGGT1_310010-t26_1-p1	transcript=TGGT1_310010-t26_1 | gene=TGGT1_310010 | organism=Toxoplasma_gondii_GT1 | gene_product=rhoptry neck protein RON1 | transcript_product=rhoptry neck protein RON1 | location=TGGT1_chrXI:969238-974493(+) | protein_length=1158 | sequence_SO=chromosome | SO=protein_coding	TGGT1_310010-t26_1-p1 [272-288]	0	2046.96	17	0.876	0.086	-0.19	-3.54	0.486416	0.0708958	0.782871	0.317811	65.89	0.75	0.136	1.383	0.876	0.086	0.291	0.027	-2.87	0.47	-0.19	-3.54	-1.78	-5.19	12380.2	7035.21	8847.91	980.464	109.35	28.08	164.78	134.48	51545.9
FALSE	High	MEDLLELFR	[K].MEDLLELFR.[A]					0.000195131	0	1	1	8	TGGT1_213350-t26_1-p1	transcript=TGGT1_213350-t26_1 | gene=TGGT1_213350 | organism=Toxoplasma_gondii_GT1 | gene_product=ribosomal protein RPS15 | transcript_product=ribosomal protein RPS15 | location=TGGT1_chrV:820008-821446(-) | protein_length=150 | sequence_SO=chromosome | SO=protein_coding	TGGT1_213350-t26_1-p1 [35-43]	0	1165.59	9	64.188	0.958	6	-0.06	0.0280641	0.409452	0.322883	0.613696	82.72	10.48	12.651	100	64.188	1.032	0.958	0.71	3.66	6.64	6	0.04	-0.06	-0.49	3775.52	231814	2159813	2.06868e+06	80.23	30.77	99.23	80.62	10285.1
FALSE	High	TELGATDVLCVNTIR	[K].TELGATDVLCVNTIR.[C]					5.01644e-06	0	1	1	2	TGGT1_318310-t26_1-p1	transcript=TGGT1_318310-t26_1 | gene=TGGT1_318310 | organism=Toxoplasma_gondii_GT1 | gene_product=transketolase | transcript_product=transketolase | location=TGGT1_chrIV:1364235-1371398(-) | protein_length=699 | sequence_SO=chromosome | SO=protein_coding	TGGT1_318310-t26_1-p1 [29-43]	0	1604.83	15
FALSE	High	VFEDADNVAMAVR	[R].VFEDADNVAMAVR.[A]					3.13633e-05	0	1	1	3	TGGT1_260180-t26_1-p1	transcript=TGGT1_260180-t26_1 | gene=TGGT1_260180 | organism=Toxoplasma_gondii_GT1 | gene_product=hypothetical protein | transcript_product=hypothetical protein | location=TGGT1_chrVIIb:2449773-2451633(-) | protein_length=157 | sequence_SO=chromosome | SO=protein_coding	TGGT1_260180-t26_1-p1 [129-141]	0	1436.68	13	1.962	0.71	0.97	-0.49	0.941228	0.33602	0.977611	0.597553	77.75	2.01	1.962	0.134	2.991	0.729	0.71	0.015	0.97	-2.9	1.58	-0.46	-0.49	-6.04	6883.62	12925.5	392401	192650	46.27	72.81	62.42	84.52	6883.62
FALSE	High	EVPEAAITEQGFDIVSPPGTLR	[K].EVPEAAITEQGFDIVSPPGTLR.[V]					8.78352e-05	0	1	1	3	TGGT1_220270-t26_1-p1	transcript=TGGT1_220270-t26_1 | gene=TGGT1_220270 | organism=Toxoplasma_gondii_GT1 | gene_product=alveolin domain containing intermediate filament IMC6 | transcript_product=alveolin domain containing intermediate filament IMC6 | location=TGGT1_chrV:152699-154033(-) | protein_length=444 | sequence_SO=chromosome | SO=protein_coding	TGGT1_220270-t26_1-p1 [318-339]	0	2326.19	22
FALSE	High	EYLLEGSGTQGAFK	[R].EYLLEGSGTQGAFK.[S]	1xLabel:13C(6)15N(2) [K14]	1xLabel:13C(6)15N(2) [K14]			0.000180967	0	1	1	3	TGGT1_305850-t26_1-p1	transcript=TGGT1_305850-t26_1 | gene=TGGT1_305850 | organism=Toxoplasma_gondii_GT1 | gene_product=RNA recognition motif-containing protein | transcript_product=RNA recognition motif-containing protein | location=TGGT1_chrIX:5399604-5403723(-) | protein_length=372 | sequence_SO=chromosome | SO=protein_coding	TGGT1_305850-t26_1-p1 [71-84]	0	1507.75	14
FALSE	High	EYLLEGSGTQGAFK	[R].EYLLEGSGTQGAFK.[S]					0.000146945	0	1	1	5	TGGT1_305850-t26_1-p1	transcript=TGGT1_305850-t26_1 | gene=TGGT1_305850 | organism=Toxoplasma_gondii_GT1 | gene_product=RNA recognition motif-containing protein | transcript_product=RNA recognition motif-containing protein | location=TGGT1_chrIX:5399604-5403723(-) | protein_length=372 | sequence_SO=chromosome | SO=protein_coding	TGGT1_305850-t26_1-p1 [71-84]	0	1499.74	14	1.129	0.516	0.17	-0.95	0.105242	0.163985	0.53594	0.483266	6.44	13.67	1.129	1.289	1.08	0.695	0.516	0.166	0.17	0.37	0.11	-0.53	-0.95	-2.59	9876.74	12291.2	632217	213251	10.17	9.47	72.64	33.46	9388.85
FALSE	High	TEIQAFFDALER	[K].TEIQAFFDALER.[A]					0.000165407	0	1	1	1	TGGT1_311690-t26_1-p1	transcript=TGGT1_311690-t26_1 | gene=TGGT1_311690 | organism=Toxoplasma_gondii_GT1 | gene_product=UBA/TS-N domain-containing protein | transcript_product=UBA/TS-N domain-containing protein | location=TGGT1_chrXI:2169894-2173346(-) | protein_length=417 | sequence_SO=chromosome | SO=protein_coding	TGGT1_311690-t26_1-p1 [335-346]	0	1439.72	12	1.105	1.784	0.14	0.84	0.650223	0.453667	0.854849	0.628703	95.62	100.93	0.392	10.969	1.105	1.784	9.161	0.57	-1.35	3.46	0.14	0.84	3.2	-0.81	11299.9	9844.99	6912.56	30883.8	78.39	39.94	168.94	144.86	13341.6
FALSE	High	KVIMSAPPKDDTPMFVMGVNNDQYK	[K].KVIMSAPPKDDTPMFVMGVNNDQYK.[S]	3xLabel:13C(6)15N(2) [K1; K9; K25]	3xLabel:13C(6)15N(2) [K1; K9; K25]			1.03068e-05	0	1	1	14	TGGT1_289690-t26_1-p1	transcript=TGGT1_289690-t26_1 | gene=TGGT1_289690 | organism=Toxoplasma_gondii_GT1 | gene_product=glyceraldehyde-3-phosphate dehydrogenase GAPDH1 | transcript_product=glyceraldehyde-3-phosphate dehydrogenase GAPDH1 | location=TGGT1_chrIX:3189155-3191218(-) | protein_length=489 | sequence_SO=chromosome | SO=protein_coding	TGGT1_289690-t26_1-p1 [266-290]	2	2849.41	25
FALSE	High	VESIIAGSDTTPR	[K].VESIIAGSDTTPR.[S]	1xLabel:13C(6)15N(4) [R13]	1xLabel:13C(6)15N(4) [R13]			5.25732e-05	0	1	1	6	TGGT1_229010-t26_1-p1	transcript=TGGT1_229010-t26_1 | gene=TGGT1_229010 | organism=Toxoplasma_gondii_GT1 | gene_product=rhoptry neck protein RON4 | transcript_product=rhoptry neck protein RON4 | location=TGGT1_chrVIII:18238-24970(+) | protein_length=984 | sequence_SO=chromosome | SO=protein_coding	TGGT1_229010-t26_1-p1 [85-97]	0	1355.7	13	0.39	0.838	-1.36	-0.26	0.971217	0.937825	0.988399	0.957427	12.16	25.78	0.179	12.226	0.39	0.838	1.748	0.63	-2.48	3.61	-1.36	-0.26	0.81	-0.67	10884.2	7622.92	504083	881250	120.2	42.6	76.17	48.82	42547.3
FALSE	High	LPFAAVHGDPDLVAVGK	[R].LPFAAVHGDPDLVAVGK.[T]	1xLabel:13C(6)15N(2) [K17]	1xLabel:13C(6)15N(2) [K17]			0.00011673	0	1	1	4	TGGT1_288500-t26_1-p1	transcript=TGGT1_288500-t26_1 | gene=TGGT1_288500 | organism=Toxoplasma_gondii_GT1 | gene_product=FAD Malate-dehydrogenase (MDH-FAD) | transcript_product=FAD Malate-dehydrogenase (MDH-FAD) | location=TGGT1_chrIX:2391742-2395938(-) | protein_length=550 | sequence_SO=chromosome | SO=protein_coding	TGGT1_288500-t26_1-p1 [367-383]	0	1713.94	17	1.866	0.855	0.9	-0.23	0.222912	0.466778	0.657629	0.633302	67.76	6.3	3.597	1.013	1.866	0.806	0.855	100	1.85	0.02	0.9	-0.31	-0.23	6.64	11424.2	18282	489889	480143	70.66	83.94	85.93	58.78	11424.2
FALSE	High	EYGTIPHAGFGLGFER	[R].EYGTIPHAGFGLGFER.[L]	1xLabel:13C(6)15N(4) [R16]	1xLabel:13C(6)15N(4) [R16]			0.000105675	0	1	1	10	TGGT1_270510-t26_1-p1	transcript=TGGT1_270510-t26_1 | gene=TGGT1_270510 | organism=Toxoplasma_gondii_GT1 | gene_product=asparaginyl-tRNA synthetase (NOB+tRNA synthase) | transcript_product=asparaginyl-tRNA synthetase (NOB+tRNA synthase) | location=TGGT1_chrVIII:5218409-5221722(+) | protein_length=676 | sequence_SO=chromosome | SO=protein_coding	TGGT1_270510-t26_1-p1 [635-650]	0	1760.86	16
FALSE	High	EYGTIPHAGFGLGFER	[R].EYGTIPHAGFGLGFER.[L]					0.000136697	0	1	1	12	TGGT1_270510-t26_1-p1	transcript=TGGT1_270510-t26_1 | gene=TGGT1_270510 | organism=Toxoplasma_gondii_GT1 | gene_product=asparaginyl-tRNA synthetase (NOB+tRNA synthase) | transcript_product=asparaginyl-tRNA synthetase (NOB+tRNA synthase) | location=TGGT1_chrVIII:5218409-5221722(+) | protein_length=676 | sequence_SO=chromosome | SO=protein_coding	TGGT1_270510-t26_1-p1 [635-650]	0	1750.85	16	0.996	0.987	-0.01	-0.02	0.452011	0.430963	0.763573	0.62065	17.17	8.96	0.996	14.337	0.88	0.987	0.926	100	-0.01	3.84	-0.19	-0.02	-0.11	6.64	12566.6	11053.3	687950	1.12418e+06	132.88	110.52	93.09	97.69	68890.8
FALSE	High	SAESLNANVTR	[R].SAESLNANVTR.[L]	1xLabel:13C(6)15N(4) [R11]	1xLabel:13C(6)15N(4) [R11]			0.000118669	0	1	1	15	TGGT1_263050-t26_1-p1	transcript=TGGT1_263050-t26_1 | gene=TGGT1_263050 | organism=Toxoplasma_gondii_GT1 | gene_product=ribosomal protein RPL13 | transcript_product=ribosomal protein RPL13 | location=TGGT1_chrVIIb:826699-830544(-) | protein_length=355 | sequence_SO=chromosome | SO=protein_coding	TGGT1_263050-t26_1-p1 [247-257]	0	1171.59	11
FALSE	High	EYGPPMIVNDGVTIAR	[K].EYGPPMIVNDGVTIAR.[N]					1.97534e-05	0	1	1	2	TGGT1_240600-t26_1-p1	transcript=TGGT1_240600-t26_1 | gene=TGGT1_240600 | organism=Toxoplasma_gondii_GT1 | gene_product=putative chaperonin cpn60 | transcript_product=putative chaperonin cpn60 | location=TGGT1_chrVI:1306402-1309981(+) | protein_length=667 | sequence_SO=chromosome | SO=protein_coding	TGGT1_240600-t26_1-p1 [136-151]	0	1731.87	16	0.855	1.294	-0.23	0.37	0.124354	0.459092	0.567743	0.630602	10.46	70.05	0.855	0.952	0.772	1.294	13.175	0.682	-0.23	-0.07	-0.37	0.37	3.72	-0.55	10991	8488.32	10730.5	13882.1	45.22	41.54	171.13	166.24	12903.7
FALSE	High	SAESLNANVTR	[R].SAESLNANVTR.[L]					0.000126715	0	1	1	16	TGGT1_263050-t26_1-p1	transcript=TGGT1_263050-t26_1 | gene=TGGT1_263050 | organism=Toxoplasma_gondii_GT1 | gene_product=ribosomal protein RPL13 | transcript_product=ribosomal protein RPL13 | location=TGGT1_chrVIIb:826699-830544(-) | protein_length=355 | sequence_SO=chromosome | SO=protein_coding	TGGT1_263050-t26_1-p1 [247-257]	0	1161.59	11	0.808	0.744	-0.31	-0.43	0.115617	0.0232637	0.555275	0.213376	6.2	2.35	0.808	0.86	0.606	0.744	0.829	0.722	-0.31	-0.22	-0.72	-0.43	-0.27	-0.47	141956	113922	3.58127e+06	2.67081e+06	60.98	68	15.74	9.96	360686
FALSE	High	SAENSGEYMWHMPLAK	[K].SAENSGEYMWHMPLAK.[D]	1xLabel:13C(6)15N(2) [K16]	1xLabel:13C(6)15N(2) [K16]			6.70787e-06	0	1	1	7	TGGT1_290670-t26_1-p1	transcript=TGGT1_290670-t26_1 | gene=TGGT1_290670 | organism=Toxoplasma_gondii_GT1 | gene_product=leucyl aminopeptidase LAP | transcript_product=leucyl aminopeptidase LAP | location=TGGT1_chrIX:3637150-3642271(+) | protein_length=781 | sequence_SO=chromosome | SO=protein_coding	TGGT1_290670-t26_1-p1 [687-702]	0	1858.83	16
FALSE	High	KVPEVNAFIEGNEIVYK	[K].KVPEVNAFIEGNEIVYK.[S]					0.000134867	0	1	1	2	TGGT1_219550-t26_1-p1	transcript=TGGT1_219550-t26_1 | gene=TGGT1_219550 | organism=Toxoplasma_gondii_GT1 | gene_product=dihydrolipoyllysine-residue succinyltransferase component of oxoglutarate dehydrogenase | transcript_product=dihydrolipoyllysine-residue succinyltransferase component of oxoglutarate dehydrogenase | location=TGGT1_chrXII:790088-797741(-) | protein_length=470 | sequence_SO=chromosome | SO=protein_codi…	TGGT1_219550-t26_1-p1 [313-329]	1	1949.04	17
FALSE	High	LPFAAVHGDPDLVAVGK	[R].LPFAAVHGDPDLVAVGK.[T]					3.0456e-05	0	1	1	7	TGGT1_288500-t26_1-p1	transcript=TGGT1_288500-t26_1 | gene=TGGT1_288500 | organism=Toxoplasma_gondii_GT1 | gene_product=FAD Malate-dehydrogenase (MDH-FAD) | transcript_product=FAD Malate-dehydrogenase (MDH-FAD) | location=TGGT1_chrIX:2391742-2395938(-) | protein_length=550 | sequence_SO=chromosome | SO=protein_coding	TGGT1_288500-t26_1-p1 [367-383]	0	1705.93	17
FALSE	High	IPETSVWNENER	[R].IPETSVWNENER.[V]	1xLabel:13C(6)15N(4) [R12]	1xLabel:13C(6)15N(4) [R12]			2.6919e-05	0	1	1	11	TGGT1_363030-t26_1-p1	transcript=TGGT1_363030-t26_1 | gene=TGGT1_363030 | organism=Toxoplasma_gondii_GT1 | gene_product=rhoptry protein ROP8 | transcript_product=rhoptry protein ROP8 | location=AAQM03000199:1511-3196(+) | protein_length=561 | sequence_SO=contig | SO=protein_coding	TGGT1_363030-t26_1-p1 [209-220]	0	1483.71	12
FALSE	High	LPFDELNLLQSHQR	[R].LPFDELNLLQSHQR.[Y]					0.000210545	0	1	1	2	TGGT1_292080-t26_1-p1	transcript=TGGT1_292080-t26_1 | gene=TGGT1_292080 | organism=Toxoplasma_gondii_GT1 | gene_product=leucyl-tRNA synthetase | transcript_product=leucyl-tRNA synthetase | location=TGGT1_chrIX:4343158-4354677(+) | protein_length=1261 | sequence_SO=chromosome | SO=protein_coding	TGGT1_292080-t26_1-p1 [1205-1218]	0	1709.9	14	0.426	0.909	-1.23	-0.14	0.782535	0.065406	0.914272	0.306898	18.8	3.89	0.128	0.426	6.196	0.909	0.938	0.851	-2.96	-1.23	2.63	-0.14	-0.09	-0.23	11387.7	5248.65	1.1777e+06	1.10487e+06	124.63	14.57	47.47	42.79	49840.6
FALSE	High	KVIMSAPPKDDTPMFVMGVNNDQYK	[K].KVIMSAPPKDDTPMFVMGVNNDQYK.[S]					0.000175515	0	1	1	11	TGGT1_289690-t26_1-p1	transcript=TGGT1_289690-t26_1 | gene=TGGT1_289690 | organism=Toxoplasma_gondii_GT1 | gene_product=glyceraldehyde-3-phosphate dehydrogenase GAPDH1 | transcript_product=glyceraldehyde-3-phosphate dehydrogenase GAPDH1 | location=TGGT1_chrIX:3189155-3191218(-) | protein_length=489 | sequence_SO=chromosome | SO=protein_coding	TGGT1_289690-t26_1-p1 [266-290]	2	2825.37	25	0.651	0.768	-0.62	-0.38	0.265308	0.00568447	0.680218	0.197599	18	0.18	0.139	0.838	0.651	0.811	0.768	0.766	-2.85	-0.26	-0.62	-0.3	-0.38	-0.38	7980.06	4184.59	794102	616814	39.01	93.81	97.98	96.4	7980.06
FALSE	High	TELQEVVQFLR	[K].TELQEVVQFLR.[D]					0.000193681	0	1	1	1	TGGT1_259260-t26_1-p1	transcript=TGGT1_259260-t26_1 | gene=TGGT1_259260 | organism=Toxoplasma_gondii_GT1 | gene_product=membrane protein FtsH1 | transcript_product=membrane protein FtsH1 | location=TGGT1_chrVIIb:2788863-2795704(-) | protein_length=1250 | sequence_SO=chromosome | SO=protein_coding	TGGT1_259260-t26_1-p1 [361-371]	0	1361.74	11
FALSE	High	TELSAVLPLYQTDGEPA	[R].TELSAVLPLYQTDGEPA.[-]					1.72439e-05	0	2	2	11	TGGT1_363030-t26_1-p1; TGGT1_215775-t26_1-p1	transcript=TGGT1_363030-t26_1 | gene=TGGT1_363030 | organism=Toxoplasma_gondii_GT1 | gene_product=rhoptry protein ROP8 | transcript_product=rhoptry protein ROP8 | location=AAQM03000199:1511-3196(+) | protein_length=561 | sequence_SO=contig | SO=protein_coding transcript=TGGT1_215775-t26_1 | gene=TGGT1_215775 | organism=Toxoplasma_gondii_GT1 | gene_product=rhoptry protein ROP8 | transcript_product…	TGGT1_363030-t26_1-p1 [545-561]; TGGT1_215775-t26_1-p1 [559-575]	0	1803.9	17
FALSE	High	KVDTIGLVFHPPNMFINVK	[K].KVDTIGLVFHPPNMFINVK.[L]	2xLabel:13C(6)15N(2) [K1; K19]	2xLabel:13C(6)15N(2) [K1; K19]			2.66041e-05	0	1	1	2	TGGT1_216650-t26_1-p1	transcript=TGGT1_216650-t26_1 | gene=TGGT1_216650 | organism=Toxoplasma_gondii_GT1 | gene_product=S15 sporozoite-expressed protein | transcript_product=S15 sporozoite-expressed protein | location=TGGT1_chrXI:5902644-5904672(-) | protein_length=400 | sequence_SO=chromosome | SO=protein_coding	TGGT1_216650-t26_1-p1 [241-259]	1	2185.22	19
FALSE	High	MADLLFDSNLTLVK	[K].MADLLFDSNLTLVK.[S]					2.34396e-05	0	1	1	1	TGGT1_297880-t26_1-p1	transcript=TGGT1_297880-t26_1 | gene=TGGT1_297880 | organism=Toxoplasma_gondii_GT1 | gene_product=dense granule protein DG32 | transcript_product=dense granule protein DG32 | location=TGGT1_chrII:2069382-2070384(-) | protein_length=219 | sequence_SO=chromosome | SO=protein_coding	TGGT1_297880-t26_1-p1 [168-181]	0	1579.84	14	1.172	1.746	0.23	0.8	0.179018	0.120406	0.61947	0.424841	15.28	11.52	1.172	1.051	1.457	1.746	1.882	1.11	0.23	0.07	0.54	0.8	0.91	0.15	9971.45	12912.1	6104.88	10658.5	21.57	8.95	169.07	166.6	9971.45
FALSE	High	TELTYAVTSEQIK	[R].TELTYAVTSEQIK.[D]	1xLabel:13C(6)15N(2) [K13]	1xLabel:13C(6)15N(2) [K13]			3.14555e-05	0	1	1	10	TGGT1_219320-t26_1-p1	transcript=TGGT1_219320-t26_1 | gene=TGGT1_219320 | organism=Toxoplasma_gondii_GT1 | gene_product=acid phosphatase GAP50 | transcript_product=acid phosphatase GAP50 | location=TGGT1_chrXII:907511-910397(-) | protein_length=431 | sequence_SO=chromosome | SO=protein_coding	TGGT1_219320-t26_1-p1 [144-156]	0	1490.78	13
FALSE	High	MAEDYGVLHPEGMAFR	[K].MAEDYGVLHPEGMAFR.[G]					3.01003e-05	0	1	1	12	TGGT1_217890-t26_1-p1	transcript=TGGT1_217890-t26_1 | gene=TGGT1_217890 | organism=Toxoplasma_gondii_GT1 | gene_product=putative alkyl hydroperoxide reductase/ Thiol specific antioxidant/ Mal allergen | transcript_product=putative alkyl hydroperoxide reductase/ Thiol specific antioxidant/ Mal allergen | location=TGGT1_chrXII:2143499-2144089(-) | protein_length=196 | sequence_SO=chromosome | SO=protein_coding	TGGT1_217890-t26_1-p1 [111-126]	0	1822.83	16	0.46	1.061	-1.12	0.09	0.0249952	0.0734435	0.308115	0.324316	4.02	0.52	0.328	0.46	0.519	1.061	1.065	1.021	-1.61	-1.12	-0.95	0.09	0.09	0.03	9973.72	4360.21	1.80871e+06	1.92614e+06	55.36	49.83	107.37	105.34	13277.4
FALSE	High	MAEDYGVLHPEGMAFR	[K].MAEDYGVLHPEGMAFR.[G]	1xLabel:13C(6)15N(4) [R16]	1xLabel:13C(6)15N(4) [R16]			3.26783e-05	0	1	1	17	TGGT1_217890-t26_1-p1	transcript=TGGT1_217890-t26_1 | gene=TGGT1_217890 | organism=Toxoplasma_gondii_GT1 | gene_product=putative alkyl hydroperoxide reductase/ Thiol specific antioxidant/ Mal allergen | transcript_product=putative alkyl hydroperoxide reductase/ Thiol specific antioxidant/ Mal allergen | location=TGGT1_chrXII:2143499-2144089(-) | protein_length=196 | sequence_SO=chromosome | SO=protein_coding	TGGT1_217890-t26_1-p1 [111-126]	0	1832.83	16
FALSE	High	VEQSQLTGESVTVNK	[R].VEQSQLTGESVTVNK.[D]					2.09003e-06	0	1	1	4	TGGT1_230420-t26_1-p1	transcript=TGGT1_230420-t26_1 | gene=TGGT1_230420 | organism=Toxoplasma_gondii_GT1 | gene_product=sarco/endoplasmic reticulum Ca2+-ATPase | transcript_product=sarco/endoplasmic reticulum Ca2+-ATPase | location=TGGT1_chrVIII:760295-772731(+) | protein_length=1093 | sequence_SO=chromosome | SO=protein_coding	TGGT1_230420-t26_1-p1 [215-229]	0	1618.83	15	0.689	0.817	-0.54	-0.29	0.0291208	0.344428	0.325496	0.600445	6.22	22.96	0.689	0.75	0.592	0.817	1.087	0.628	-0.54	-0.42	-0.76	-0.29	0.12	-0.67	9305.87	6976.51	300139	273074	35.01	38.2	62.71	36.59	15886
FALSE	High	MAEDYGVLHPEGMAFR	[K].MAEDYGVLHPEGMAFR.[G]	1xOxidation [M]	1xOxidation [M1; M13]			7.79718e-05	0	1	1	11	TGGT1_217890-t26_1-p1	transcript=TGGT1_217890-t26_1 | gene=TGGT1_217890 | organism=Toxoplasma_gondii_GT1 | gene_product=putative alkyl hydroperoxide reductase/ Thiol specific antioxidant/ Mal allergen | transcript_product=putative alkyl hydroperoxide reductase/ Thiol specific antioxidant/ Mal allergen | location=TGGT1_chrXII:2143499-2144089(-) | protein_length=196 | sequence_SO=chromosome | SO=protein_coding	TGGT1_217890-t26_1-p1 [111-126]	0	1838.82	16	1.802	1.053	0.85	0.07	0.115516	0.331544	0.555275	0.595765	0.69	9.78	1.793	1.802	5.12	1.16	1.053	0.983	0.84	0.85	2.36	0.21	0.07	-0.02	4720.72	11875.3	1.41938e+06	1.49422e+06	52.02	21.23	72.13	65.44	7287.57
FALSE	High	TELLSSADVVDGDK	[R].TELLSSADVVDGDK.[L]					0.000214132	0	1	1	1	TGGT1_286120-t26_1-p1	transcript=TGGT1_286120-t26_1 | gene=TGGT1_286120 | organism=Toxoplasma_gondii_GT1 | gene_product=prolyl endopeptidase | transcript_product=prolyl endopeptidase | location=TGGT1_chrV:1831629-1840693(-) | protein_length=825 | sequence_SO=chromosome | SO=protein_coding	TGGT1_286120-t26_1-p1 [443-456]	0	1448.71	14
FALSE	High	EYQIIDHFFQPGNCAAPLKDDVMK	[K].EYQIIDHFFQPGNCAAPLKDDVMK.[I]					3.22972e-05	0	1	1	1	TGGT1_305520-t26_1-p1	transcript=TGGT1_305520-t26_1 | gene=TGGT1_305520 | organism=Toxoplasma_gondii_GT1 | gene_product=ribosomal protein RPS2 | transcript_product=ribosomal protein RPS2 | location=TGGT1_chrIX:5229307-5231745(+) | protein_length=269 | sequence_SO=chromosome | SO=protein_coding	TGGT1_305520-t26_1-p1 [67-90]	1	2779.32	24
FALSE	High	KVEEELSLLR	[K].KVEEELSLLR.[R]					0.000142314	0	1	1	16	TGGT1_227280-t26_1-p1	transcript=TGGT1_227280-t26_1 | gene=TGGT1_227280 | organism=Toxoplasma_gondii_GT1 | gene_product=dense granule protein GRA3 | transcript_product=dense granule protein GRA3 | location=TGGT1_chrX:956231-956899(-) | protein_length=222 | sequence_SO=chromosome | SO=protein_coding	TGGT1_227280-t26_1-p1 [114-123]	1	1215.69	10	0.81	0.937	-0.3	-0.09	0.379556	0.255865	0.733973	0.550084	11.91	8.85	0.81	0.018	0.909	0.845	1.001	0.937	-0.3	-5.78	-0.14	-0.24	0	-0.09	281635	216041	3744388	3.74692e+06	58.05	111.8	78.92	79.53	266791
FALSE	High	VEQSQLTGESVTVNK	[R].VEQSQLTGESVTVNK.[D]	1xLabel:13C(6)15N(2) [K15]	1xLabel:13C(6)15N(2) [K15]			4.28917e-05	0	1	1	3	TGGT1_230420-t26_1-p1	transcript=TGGT1_230420-t26_1 | gene=TGGT1_230420 | organism=Toxoplasma_gondii_GT1 | gene_product=sarco/endoplasmic reticulum Ca2+-ATPase | transcript_product=sarco/endoplasmic reticulum Ca2+-ATPase | location=TGGT1_chrVIII:760295-772731(+) | protein_length=1093 | sequence_SO=chromosome | SO=protein_coding	TGGT1_230420-t26_1-p1 [215-229]	0	1626.84	15
FALSE	High	KVEEELSLLR	[K].KVEEELSLLR.[R]	1xLabel:13C(6)15N(2) [K1]; 1xLabel:13C(6)15N(4) [R10]	1xLabel:13C(6)15N(2) [K1]; 1xLabel:13C(6)15N(4) [R10]			0.000137805	0	1	1	17	TGGT1_227280-t26_1-p1	transcript=TGGT1_227280-t26_1 | gene=TGGT1_227280 | organism=Toxoplasma_gondii_GT1 | gene_product=dense granule protein GRA3 | transcript_product=dense granule protein GRA3 | location=TGGT1_chrX:956231-956899(-) | protein_length=222 | sequence_SO=chromosome | SO=protein_coding	TGGT1_227280-t26_1-p1 [114-123]	1	1233.72	10
FALSE	High	EYPPLQQQVLTLLQK	[K].EYPPLQQQVLTLLQK.[A]					7.64319e-05	0	1	1	2	TGGT1_292080-t26_1-p1	transcript=TGGT1_292080-t26_1 | gene=TGGT1_292080 | organism=Toxoplasma_gondii_GT1 | gene_product=leucyl-tRNA synthetase | transcript_product=leucyl-tRNA synthetase | location=TGGT1_chrIX:4343158-4354677(+) | protein_length=1261 | sequence_SO=chromosome | SO=protein_coding	TGGT1_292080-t26_1-p1 [1129-1143]	0	1798.01	15	2.082	0.639	1.06	-0.65	0.974789	0.412378	0.989674	0.615065	15.66	59.16	2.082	2.301	0.191	1.398	0.639	0.014	1.06	1.2	-2.39	0.48	-0.65	-6.13	6027.5	5478.81	13664.1	9105.42	43.89	90.31	163.93	27.39	6072.76
FALSE	High	LPFDELNLLQSHQR	[R].LPFDELNLLQSHQR.[Y]	1xLabel:13C(6)15N(4) [R14]	1xLabel:13C(6)15N(4) [R14]			0.000123981	0	1	1	5	TGGT1_292080-t26_1-p1	transcript=TGGT1_292080-t26_1 | gene=TGGT1_292080 | organism=Toxoplasma_gondii_GT1 | gene_product=leucyl-tRNA synthetase | transcript_product=leucyl-tRNA synthetase | location=TGGT1_chrIX:4343158-4354677(+) | protein_length=1261 | sequence_SO=chromosome | SO=protein_coding	TGGT1_292080-t26_1-p1 [1205-1218]	0	1719.91	14
FALSE	High	TELTYAVTSEQIK	[R].TELTYAVTSEQIK.[D]					5.41854e-06	0	1	1	17	TGGT1_219320-t26_1-p1	transcript=TGGT1_219320-t26_1 | gene=TGGT1_219320 | organism=Toxoplasma_gondii_GT1 | gene_product=acid phosphatase GAP50 | transcript_product=acid phosphatase GAP50 | location=TGGT1_chrXII:907511-910397(-) | protein_length=431 | sequence_SO=chromosome | SO=protein_coding	TGGT1_219320-t26_1-p1 [144-156]	0	1482.77	13	0.859	0.736	-0.22	-0.44	0.120266	0.0257039	0.561932	0.218878	8.48	1.72	0.732	0.859	0.925	0.736	0.831	0.72	-0.45	-0.22	-0.11	-0.44	-0.27	-0.47	359018	262980	9.44212e+06	7.85049e+06	29.23	35.4	53.84	50.51	359018
FALSE	High	KVGIEQTHDAGTPITEPMK	[K].KVGIEQTHDAGTPITEPMK.[V]					8.73405e-05	0	1	1	3	TGGT1_316310-t26_1-p1	transcript=TGGT1_316310-t26_1 | gene=TGGT1_316310 | organism=Toxoplasma_gondii_GT1 | gene_product=superoxide dismutase | transcript_product=superoxide dismutase | location=TGGT1_chrXI:5175968-5177674(-) | protein_length=201 | sequence_SO=chromosome | SO=protein_coding	TGGT1_316310-t26_1-p1 [137-155]	1	2052.04	19	1.196	0.721	0.26	-0.47	0.337309	0.0423261	0.712607	0.252742	31.69	4.21	1.743	1.196	0.941	0.761	0.721	0.584	0.8	0.26	-0.09	-0.39	-0.47	-0.78	7794.38	9102.27	367509	265128	47.1	54.11	67.86	53.13	7794.38
FALSE	High	MAEDYGVLHPEGMAFR	[K].MAEDYGVLHPEGMAFR.[G]	1xOxidation [M]; 1xLabel:13C(6)15N(4) [R16]	1xOxidation [M1; M13]; 1xLabel:13C(6)15N(4) [R16]			8.98402e-05	0	1	1	14	TGGT1_217890-t26_1-p1	transcript=TGGT1_217890-t26_1 | gene=TGGT1_217890 | organism=Toxoplasma_gondii_GT1 | gene_product=putative alkyl hydroperoxide reductase/ Thiol specific antioxidant/ Mal allergen | transcript_product=putative alkyl hydroperoxide reductase/ Thiol specific antioxidant/ Mal allergen | location=TGGT1_chrXII:2143499-2144089(-) | protein_length=196 | sequence_SO=chromosome | SO=protein_coding	TGGT1_217890-t26_1-p1 [111-126]	0	1848.83	16
FALSE	High	IAALEDAGVHVVR	[K].IAALEDAGVHVVR.[N]	1xLabel:13C(6)15N(4) [R13]	1xLabel:13C(6)15N(4) [R13]			0.000177319	0	1	1	11	TGGT1_290600-t26_1-p1	transcript=TGGT1_290600-t26_1 | gene=TGGT1_290600 | organism=Toxoplasma_gondii_GT1 | gene_product=succinyl-CoA-synthetase alpha SCSA | transcript_product=succinyl-CoA-synthetase alpha SCSA | location=TGGT1_chrIX:3568986-3572521(+) | protein_length=333 | sequence_SO=chromosome | SO=protein_coding	TGGT1_290600-t26_1-p1 [302-314]	0	1359.76	13
FALSE	High	SAELGVAYIESLVR	[K].SAELGVAYIESLVR.[E]					0.000138176	0	1	1	1	TGGT1_246130-t26_1-p1	transcript=TGGT1_246130-t26_1 | gene=TGGT1_246130 | organism=Toxoplasma_gondii_GT1 | gene_product=serpin (serine proteinase inhibitor) superfamily protein | transcript_product=serpin (serine proteinase inhibitor) superfamily protein | location=TGGT1_chrXII:2610457-2612239(+) | protein_length=432 | sequence_SO=chromosome | SO=protein_coding	TGGT1_246130-t26_1-p1 [274-287]	0	1506.82	14	2.364	0.706	1.24	-0.5	0.205398	0.549871	0.64466	0.683466	80.02	72.67	2.364	1.088	5.965	3.329	0.706	0.011	1.24	0.12	2.58	1.74	-0.5	-6.47	5545.1	11443.4	10762.1	10757.1	78.56	22.39	170.29	29.31	5545.1
FALSE	High	EWVTGDSVLTGLK	[K].EWVTGDSVLTGLK.[I]					0.000131268	0	1	1	10	TGGT1_233480-t26_1-p1	transcript=TGGT1_233480-t26_1 | gene=TGGT1_233480 | organism=Toxoplasma_gondii_GT1 | gene_product=SAG-related sequence SRS29C | transcript_product=SAG-related sequence SRS29C | location=TGGT1_chrVIII:2667297-2668415(+) | protein_length=372 | sequence_SO=chromosome | SO=protein_coding	TGGT1_233480-t26_1-p1 [136-148]	0	1404.74	13	0.831	100	-0.27	6.64	0.262269	0.228609	0.677346	0.531065	15.8	0	0.831	0.702	1.028	100	100	0.515	-0.27	-0.51	0.04	6.64	6.64	-0.96	6845.29	5686.95	3864.19	3121958	37.02	55.96	173.05	65.56	6845.29
FALSE	High	TELLLNASGAPTGR	[R].TELLLNASGAPTGR.[V]					6.75823e-05	0	1	1	4	TGGT1_305850-t26_1-p1	transcript=TGGT1_305850-t26_1 | gene=TGGT1_305850 | organism=Toxoplasma_gondii_GT1 | gene_product=RNA recognition motif-containing protein | transcript_product=RNA recognition motif-containing protein | location=TGGT1_chrIX:5399604-5403723(-) | protein_length=372 | sequence_SO=chromosome | SO=protein_coding	TGGT1_305850-t26_1-p1 [326-339]	0	1399.75	14	0.413	0.785	-1.28	-0.35	0.524559	0.0295463	0.797835	0.229322	16.41	6.42	0.413	0.145	2.488	0.84	0.785	0.722	-1.28	-2.78	1.32	-0.25	-0.35	-0.47	7224.48	2984.2	409540	321295	16.09	114.32	77.22	70.43	7224.48
FALSE	High	SAELAAEVDCNLLDGR	[K].SAELAAEVDCNLLDGR.[T]	1xLabel:13C(6)15N(4) [R16]	1xLabel:13C(6)15N(4) [R16]			5.71786e-05	0	1	1	1	TGGT1_263300-t26_1-p1	transcript=TGGT1_263300-t26_1 | gene=TGGT1_263300 | organism=Toxoplasma_gondii_GT1 | gene_product=eukaryotic porin protein | transcript_product=eukaryotic porin protein | location=TGGT1_chrVIIb:618828-622551(-) | protein_length=290 | sequence_SO=chromosome | SO=protein_coding	TGGT1_263300-t26_1-p1 [205-220]	0	1685.8	16	0.612	0.798	-0.71	-0.33	0.361389	0.276874	0.722768	0.566141	44.16	4.4	1.218	0.125	0.612	0.835	0.23	0.798	0.28	-3	-0.71	-0.26	-2.12	-0.33	6954.24	8470.78	411467	343528	158.28	92.76	76.63	89.08	6954.24
FALSE	High	EVQGMEINDLQPMQIR	[R].EVQGMEINDLQPMQIR.[V]	1xLabel:13C(6)15N(4) [R16]	1xLabel:13C(6)15N(4) [R16]			0.000127753	0	1	1	1	TGGT1_290290-t26_1-p1	transcript=TGGT1_290290-t26_1 | gene=TGGT1_290290 | organism=Toxoplasma_gondii_GT1 | gene_product=ubiquitin-activating enzyme E1 family protein | transcript_product=ubiquitin-activating enzyme E1 family protein | location=TGGT1_chrIX:3489378-3499339(+) | protein_length=1092 | sequence_SO=chromosome | SO=protein_coding	TGGT1_290290-t26_1-p1 [221-236]	0	1910.93	16
FALSE	High	EVQGMEINDLQPMQIR	[R].EVQGMEINDLQPMQIR.[V]					1.84019e-05	0	1	1	2	TGGT1_290290-t26_1-p1	transcript=TGGT1_290290-t26_1 | gene=TGGT1_290290 | organism=Toxoplasma_gondii_GT1 | gene_product=ubiquitin-activating enzyme E1 family protein | transcript_product=ubiquitin-activating enzyme E1 family protein | location=TGGT1_chrIX:3489378-3499339(+) | protein_length=1092 | sequence_SO=chromosome | SO=protein_coding	TGGT1_290290-t26_1-p1 [221-236]	0	1900.93	16	0.08	0.416	-3.65	-1.26	0.175287	0.246523	0.618047	0.544258	0.82	3.29	0.08	0.01	0.236	0.416	0.469	0.01	-3.65	-6.64	-2.09	-1.26	-1.09	-6.64	43902.7	1634.41	479474	167112	161.47	75.97	57.75	83.38	43902.7
FALSE	High	KVYIGGIEADTTTEELESIFGK	[R].KVYIGGIEADTTTEELESIFGK.[Y]					6.47348e-06	0	1	1	3	TGGT1_211420-t26_1-p1	transcript=TGGT1_211420-t26_1 | gene=TGGT1_211420 | organism=Toxoplasma_gondii_GT1 | gene_product=RNA recognition motif-containing protein | transcript_product=RNA recognition motif-containing protein | location=TGGT1_chrIV:1661239-1664919(-) | protein_length=189 | sequence_SO=chromosome | SO=protein_coding	TGGT1_211420-t26_1-p1 [13-34]	1	2400.22	22	0.969	0.701	-0.05	-0.51	0.434064	0.0145794	0.757536	0.20435	12.25	0.54	0.969	0.314	1.054	0.706	0.701	0.607	-0.05	-1.67	0.08	-0.5	-0.51	-0.72	12364.9	7848.67	315645	221157	26.67	51.02	81.63	72.78	12364.9
FALSE	High	VFADNYNPVVSEK	[K].VFADNYNPVVSEK.[V]					6.49168e-05	0	1	1	2	TGGT1_315780-t26_1-p1	transcript=TGGT1_315780-t26_1 | gene=TGGT1_315780 | organism=Toxoplasma_gondii_GT1 | gene_product=putative myosin regulatory light chain | transcript_product=putative myosin regulatory light chain | location=TGGT1_chrXI:4923626-4926382(+) | protein_length=206 | sequence_SO=chromosome | SO=protein_coding	TGGT1_315780-t26_1-p1 [118-130]	0	1481.73	13
FALSE	High	TELGATDVLCVNTIR	[K].TELGATDVLCVNTIR.[C]	1xLabel:13C(6)15N(4) [R15]	1xLabel:13C(6)15N(4) [R15]			6.12825e-05	0	1	1	2	TGGT1_318310-t26_1-p1	transcript=TGGT1_318310-t26_1 | gene=TGGT1_318310 | organism=Toxoplasma_gondii_GT1 | gene_product=transketolase | transcript_product=transketolase | location=TGGT1_chrIV:1364235-1371398(-) | protein_length=699 | sequence_SO=chromosome | SO=protein_coding	TGGT1_318310-t26_1-p1 [29-43]	0	1614.84	15	0.016	0.56	-5.94	-0.84	0.0264689	0.516265	0.313842	0.661856	0.02	45.68	0.03	0.016	0.01	3.924	0.56	0.01	-5.08	-5.94	-6.64	1.97	-0.84	-6.64	627598	9952.97	12874.4	7210.95	48.23	60.11	167.87	73.29	337334
FALSE	High	VFAFATHGLFSGPAIER	[R].VFAFATHGLFSGPAIER.[I]	1xLabel:13C(6)15N(4) [R17]	1xLabel:13C(6)15N(4) [R17]			1.7193e-05	0	1	1	2	TGGT1_220100-t26_1-p1	transcript=TGGT1_220100-t26_1 | gene=TGGT1_220100 | organism=Toxoplasma_gondii_GT1 | gene_product=phosphoribosylpyrophosphate synthetase | transcript_product=phosphoribosylpyrophosphate synthetase | location=TGGT1_chrV:29152-31918(+) | protein_length=557 | sequence_SO=chromosome | SO=protein_coding	TGGT1_220100-t26_1-p1 [484-500]	0	1829.96	17	0.193	1.196	-2.37	0.26	0.462777	0.384352	0.771359	0.606822	4.53	1.14	3.717	0.193	0.035	1.196	1.187	100	1.89	-2.37	-4.83	0.26	0.25	6.64	3069.91	5008.82	252709	341933	163.19	97.02	85.09	55.55	3069.91
FALSE	High	SAELAAEVDCNLLDGR	[K].SAELAAEVDCNLLDGR.[T]					5.41854e-06	0	1	1	3	TGGT1_263300-t26_1-p1	transcript=TGGT1_263300-t26_1 | gene=TGGT1_263300 | organism=Toxoplasma_gondii_GT1 | gene_product=eukaryotic porin protein | transcript_product=eukaryotic porin protein | location=TGGT1_chrVIIb:618828-622551(-) | protein_length=290 | sequence_SO=chromosome | SO=protein_coding	TGGT1_263300-t26_1-p1 [205-220]	0	1675.8	16
FALSE	High	KYDAFLASQVLIPQIPR	[R].KYDAFLASQVLIPQIPR.[L]					2.5455e-05	0	1	1	7	TGGT1_215470-t26_1-p1	transcript=TGGT1_215470-t26_1 | gene=TGGT1_215470 | organism=Toxoplasma_gondii_GT1 | gene_product=ribosomal protein RPL10A | transcript_product=ribosomal protein RPL10A | location=TGGT1_chrX:6865357-6867300(+) | protein_length=217 | sequence_SO=chromosome | SO=protein_coding	TGGT1_215470-t26_1-p1 [105-121]	1	1959.11	17	5.858	0.706	2.55	-0.5	0.162059	0.0361015	0.607597	0.239666	107.9	8.51	5.858	1.595	33.5	0.706	0.792	0.624	2.55	0.67	5.07	-0.5	-0.34	-0.68	5552.98	32529.1	1.92358e+06	1502317	65.62	81.11	87.7	77.06	5552.98
FALSE	High	SAEGTSESPPVPQLGTPPRPAPR	[R].SAEGTSESPPVPQLGTPPRPAPR.[R]	2xLabel:13C(6)15N(4) [R19; R23]	2xLabel:13C(6)15N(4) [R19; R23]			7.84171e-05	0	1	1	10	TGGT1_229010-t26_1-p1	transcript=TGGT1_229010-t26_1 | gene=TGGT1_229010 | organism=Toxoplasma_gondii_GT1 | gene_product=rhoptry neck protein RON4 | transcript_product=rhoptry neck protein RON4 | location=TGGT1_chrVIII:18238-24970(+) | protein_length=984 | sequence_SO=chromosome | SO=protein_coding	TGGT1_229010-t26_1-p1 [98-120]	0	2348.21	23	0.849	0.75	-0.24	-0.41	0.592522	0.0142191	0.830301	0.20435	38.32	1.7	0.544	0.849	1.329	0.735	0.816	0.75	-0.88	-0.24	0.41	-0.44	-0.29	-0.41	8774.04	7381.55	696684	568567	3.64	47.11	74.83	72.77	8774.04
FALSE	High	VFATPQSLGLDAI	[K].VFATPQSLGLDAI.[-]					0.000168435	0	1	1	6	TGGT1_239820-t26_1-p1	transcript=TGGT1_239820-t26_1 | gene=TGGT1_239820 | organism=Toxoplasma_gondii_GT1 | gene_product=D-3-phosphoglycerate dehydrogenase | transcript_product=D-3-phosphoglycerate dehydrogenase | location=TGGT1_chrVI:931789-940557(-) | protein_length=604 | sequence_SO=chromosome | SO=protein_coding	TGGT1_239820-t26_1-p1 [592-604]	0	1331.72	13
FALSE	High	VFDPTGYAGKPSLSSR	[R].VFDPTGYAGKPSLSSR.[K]	1xLabel:13C(6)15N(2) [K10]; 1xLabel:13C(6)15N(4) [R16]	1xLabel:13C(6)15N(2) [K10]; 1xLabel:13C(6)15N(4) [R16]			0.000165837	0	1	1	3	TGGT1_286600-t26_1-p1	transcript=TGGT1_286600-t26_1 | gene=TGGT1_286600 | organism=Toxoplasma_gondii_GT1 | gene_product=hypothetical protein | transcript_product=hypothetical protein | location=TGGT1_chrV:1621096-1622773(-) | protein_length=388 | sequence_SO=chromosome | SO=protein_coding	TGGT1_286600-t26_1-p1 [21-36]	0	1699.88	16
FALSE	High	SAEGTSESPPVPQLGTPPRPAPR	[R].SAEGTSESPPVPQLGTPPRPAPR.[R]					3.0456e-05	0	1	1	11	TGGT1_229010-t26_1-p1	transcript=TGGT1_229010-t26_1 | gene=TGGT1_229010 | organism=Toxoplasma_gondii_GT1 | gene_product=rhoptry neck protein RON4 | transcript_product=rhoptry neck protein RON4 | location=TGGT1_chrVIII:18238-24970(+) | protein_length=984 | sequence_SO=chromosome | SO=protein_coding	TGGT1_229010-t26_1-p1 [98-120]	0	2328.19	23
FALSE	High	KYDAFLASQVLIPQIPR	[R].KYDAFLASQVLIPQIPR.[L]	1xLabel:13C(6)15N(2) [K1]; 1xLabel:13C(6)15N(4) [R17]	1xLabel:13C(6)15N(2) [K1]; 1xLabel:13C(6)15N(4) [R17]			3.75006e-05	0	1	1	8	TGGT1_215470-t26_1-p1	transcript=TGGT1_215470-t26_1 | gene=TGGT1_215470 | organism=Toxoplasma_gondii_GT1 | gene_product=ribosomal protein RPL10A | transcript_product=ribosomal protein RPL10A | location=TGGT1_chrX:6865357-6867300(+) | protein_length=217 | sequence_SO=chromosome | SO=protein_coding	TGGT1_215470-t26_1-p1 [105-121]	1	1977.13	17
FALSE	High	EVRPDPLDAPATFEVLDYNEGILR	[K].EVRPDPLDAPATFEVLDYNEGILR.[F]					4.80858e-08	0	1	1	2	TGGT1_223920-t26_1-p1	transcript=TGGT1_223920-t26_1 | gene=TGGT1_223920 | organism=Toxoplasma_gondii_GT1 | gene_product=rhoptry neck protein RON3 | transcript_product=rhoptry neck protein RON3 | location=TGGT1_chrX:3357300-3367973(+) | protein_length=1958 | sequence_SO=chromosome | SO=protein_coding	TGGT1_223920-t26_1-p1 [816-839]	0	2729.38	24
FALSE	High	EVRPDPLDAPATFEVLDYNEGILR	[K].EVRPDPLDAPATFEVLDYNEGILR.[F]	2xLabel:13C(6)15N(4) [R3; R24]	2xLabel:13C(6)15N(4) [R3; R24]			4.99395e-07	0	1	1	3	TGGT1_223920-t26_1-p1	transcript=TGGT1_223920-t26_1 | gene=TGGT1_223920 | organism=Toxoplasma_gondii_GT1 | gene_product=rhoptry neck protein RON3 | transcript_product=rhoptry neck protein RON3 | location=TGGT1_chrX:3357300-3367973(+) | protein_length=1958 | sequence_SO=chromosome | SO=protein_coding	TGGT1_223920-t26_1-p1 [816-839]	0	2749.39	24	1.096	0.796	0.13	-0.33	0.799253	0.0107107	0.92085	0.199491	101.22	2.69	0.313	1.096	1.845	0.796	0.818	0.752	-1.68	0.13	0.88	-0.33	-0.29	-0.41	6039.36	6622.05	393629	322122	55.58	39.52	101.69	97.93	13558.4
FALSE	High	EVSAAFSSPGEKDDLQASSPETAK	[R].EVSAAFSSPGEKDDLQASSPETAK.[A]					0.00012637	0	1	1	3	TGGT1_315270-t26_1-p1	transcript=TGGT1_315270-t26_1 | gene=TGGT1_315270 | organism=Toxoplasma_gondii_GT1 | gene_product=hypothetical protein | transcript_product=hypothetical protein | location=TGGT1_chrXI:4558433-4565813(-) | protein_length=780 | sequence_SO=chromosome | SO=protein_coding	TGGT1_315270-t26_1-p1 [360-383]	1	2451.15	24	0.212	0.048	-2.23	-4.37	0.181628	0.247983	0.621686	0.545161	4.92	0.27	0.212	0.806	0.056	0.01	0.048	1.526	-2.23	-0.31	-4.15	-6.64	-4.37	0.61	12194.4	2591.25	141715	10051.4	11.2	101.47	88.2	72.02	12194.4
FALSE	High	TELLLNASGAPTGR	[R].TELLLNASGAPTGR.[V]	1xLabel:13C(6)15N(4) [R14]	1xLabel:13C(6)15N(4) [R14]			5.34955e-05	0	1	1	3	TGGT1_305850-t26_1-p1	transcript=TGGT1_305850-t26_1 | gene=TGGT1_305850 | organism=Toxoplasma_gondii_GT1 | gene_product=RNA recognition motif-containing protein | transcript_product=RNA recognition motif-containing protein | location=TGGT1_chrIX:5399604-5403723(-) | protein_length=372 | sequence_SO=chromosome | SO=protein_coding	TGGT1_305850-t26_1-p1 [326-339]	0	1409.76	14
FALSE	High	IPETSVWNENER	[R].IPETSVWNENER.[V]					3.61011e-05	0	1	1	10	TGGT1_363030-t26_1-p1	transcript=TGGT1_363030-t26_1 | gene=TGGT1_363030 | organism=Toxoplasma_gondii_GT1 | gene_product=rhoptry protein ROP8 | transcript_product=rhoptry protein ROP8 | location=AAQM03000199:1511-3196(+) | protein_length=561 | sequence_SO=contig | SO=protein_coding	TGGT1_363030-t26_1-p1 [209-220]	0	1473.7	12	38.219	0.972	5.26	-0.04	0.00198398	0.559317	0.205517	0.689578	18.78	14.63	25.52	38.219	43.06	0.972	2.12	0.87	4.67	5.26	5.43	-0.04	1.08	-0.2	6445.9	243368	1709702	2984755	13.68	36.34	73.16	65.69	6445.9
FALSE	High	KVQAESGEAQNTLTAETK	[R].KVQAESGEAQNTLTAETK.[A]					1.85109e-05	0	1	1	9	TGGT1_232710-t26_1-p1	transcript=TGGT1_232710-t26_1 | gene=TGGT1_232710 | organism=Toxoplasma_gondii_GT1 | gene_product=ribosomal protein RPS3A | transcript_product=ribosomal protein RPS3A | location=TGGT1_chrVIII:2231374-2232762(+) | protein_length=259 | sequence_SO=chromosome | SO=protein_coding	TGGT1_232710-t26_1-p1 [241-258]	1	1904.96	18	0.527	0.588	-0.92	-0.77	0.0177441	0.0116847	0.274664	0.20194	4.93	4.58	0.433	0.59	0.527	0.588	0.654	0.536	-1.21	-0.76	-0.92	-0.77	-0.61	-0.9	161785	70128	635884	374096	40.43	39.11	47.93	38.34	161785
FALSE	High	VEVENLMEGVDFSETLTR	[K].VEVENLMEGVDFSETLTR.[A]					4.79432e-08	0	1	1	9	TGGT1_311720-t26_1-p1	transcript=TGGT1_311720-t26_1 | gene=TGGT1_311720 | organism=Toxoplasma_gondii_GT1 | gene_product=chaperonin protein BiP | transcript_product=chaperonin protein BiP | location=TGGT1_chrXI:2188121-2191497(-) | protein_length=668 | sequence_SO=chromosome | SO=protein_coding	TGGT1_311720-t26_1-p1 [315-332]	0	2067.99	18	0.745	0.78	-0.42	-0.36	0.700358	0.0443775	0.877784	0.255898	46.33	3.35	0.745	0.325	23.79	0.78	0.809	0.658	-0.42	-1.62	4.57	-0.36	-0.31	-0.6	10129.4	8546.75	1.94291e+06	1.51565e+06	69.76	111.21	106.54	96.75	11474.5
FALSE	High	KVQAESGEAQNTLTAETK	[R].KVQAESGEAQNTLTAETK.[A]	2xLabel:13C(6)15N(2) [K1; K18]	2xLabel:13C(6)15N(2) [K1; K18]			6.3622e-05	0	1	1	7	TGGT1_232710-t26_1-p1	transcript=TGGT1_232710-t26_1 | gene=TGGT1_232710 | organism=Toxoplasma_gondii_GT1 | gene_product=ribosomal protein RPS3A | transcript_product=ribosomal protein RPS3A | location=TGGT1_chrVIII:2231374-2232762(+) | protein_length=259 | sequence_SO=chromosome | SO=protein_coding	TGGT1_232710-t26_1-p1 [241-258]	1	1920.98	18
FALSE	High	EVVVEYEQLNK	[K].EVVVEYEQLNK.[Q]	1xLabel:13C(6)15N(2) [K11]	1xLabel:13C(6)15N(2) [K11]			9.24055e-05	0	1	1	13	TGGT1_288380-t26_1-p1	transcript=TGGT1_288380-t26_1 | gene=TGGT1_288380 | organism=Toxoplasma_gondii_GT1 | gene_product=heat shock protein HSP90 | transcript_product=heat shock protein HSP90 | location=TGGT1_chrIX:2294323-2298742(+) | protein_length=708 | sequence_SO=chromosome | SO=protein_coding	TGGT1_288380-t26_1-p1 [259-269]	0	1357.71	11	0.362	0.706	-1.46	-0.5	0.248951	0.0176759	0.672306	0.20435	18.26	3.96	0.702	0.362	0.02	0.706	0.744	0.629	-0.51	-1.46	-5.66	-0.5	-0.43	-0.67	208313	75481	2.44725e+06	1.82126e+06	22.28	87.99	45.23	36.27	180800
FALSE	High	EVVVEYEQLNK	[K].EVVVEYEQLNK.[Q]					0.000133057	0	1	1	18	TGGT1_288380-t26_1-p1	transcript=TGGT1_288380-t26_1 | gene=TGGT1_288380 | organism=Toxoplasma_gondii_GT1 | gene_product=heat shock protein HSP90 | transcript_product=heat shock protein HSP90 | location=TGGT1_chrIX:2294323-2298742(+) | protein_length=708 | sequence_SO=chromosome | SO=protein_coding	TGGT1_288380-t26_1-p1 [259-269]	0	1349.69	11
FALSE	High	EVVSGDTFVLVGAPK	[K].EVVSGDTFVLVGAPK.[G]	1xLabel:13C(6)15N(2) [K15]	1xLabel:13C(6)15N(2) [K15]			5.90256e-05	0	1	1	3	TGGT1_238050-t26_1-p1	transcript=TGGT1_238050-t26_1 | gene=TGGT1_238050 | organism=Toxoplasma_gondii_GT1 | gene_product=nuclease and tudor domain-containing protein | transcript_product=nuclease and tudor domain-containing protein | location=TGGT1_chrVI:31087-39926(+) | protein_length=1024 | sequence_SO=chromosome | SO=protein_coding	TGGT1_238050-t26_1-p1 [10-24]	0	1525.84	15	0.228	23.399	-2.13	4.55	0.147035	0.229124	0.589373	0.531065	6.23	20.45	0.56	0.228	0.043	26.625	23.399	0.711	-0.84	-2.13	-4.53	4.73	4.55	-0.49	13034.8	1011.65	12624.3	336126	49.79	126.52	169.31	82.58	13034.8
FALSE	High	EWVTGDSVLTGLK	[K].EWVTGDSVLTGLK.[I]	1xLabel:13C(6)15N(2) [K13]	1xLabel:13C(6)15N(2) [K13]			8.85822e-05	0	1	1	10	TGGT1_233480-t26_1-p1	transcript=TGGT1_233480-t26_1 | gene=TGGT1_233480 | organism=Toxoplasma_gondii_GT1 | gene_product=SAG-related sequence SRS29C | transcript_product=SAG-related sequence SRS29C | location=TGGT1_chrVIII:2667297-2668415(+) | protein_length=372 | sequence_SO=chromosome | SO=protein_coding	TGGT1_233480-t26_1-p1 [136-148]	0	1412.75	13
FALSE	High	EVVSGDTFVLVGAPK	[K].EVVSGDTFVLVGAPK.[G]					1.3612e-05	0	1	1	3	TGGT1_238050-t26_1-p1	transcript=TGGT1_238050-t26_1 | gene=TGGT1_238050 | organism=Toxoplasma_gondii_GT1 | gene_product=nuclease and tudor domain-containing protein | transcript_product=nuclease and tudor domain-containing protein | location=TGGT1_chrVI:31087-39926(+) | protein_length=1024 | sequence_SO=chromosome | SO=protein_coding	TGGT1_238050-t26_1-p1 [10-24]	0	1517.82	15
FALSE	High	KVSEESFVPAVIEPSFGIGR	[K].KVSEESFVPAVIEPSFGIGR.[I]					6.38054e-05	0	1	1	1	TGGT1_256990-t26_1-p1	transcript=TGGT1_256990-t26_1 | gene=TGGT1_256990 | organism=Toxoplasma_gondii_GT1 | gene_product=glycyl-tRNA synthetase | transcript_product=glycyl-tRNA synthetase | location=TGGT1_chrVIIb:4226828-4230134(+) | protein_length=771 | sequence_SO=chromosome | SO=protein_coding	TGGT1_256990-t26_1-p1 [604-623]	1	2148.13	20
FALSE	High	KVSEESFVPAVIEPSFGIGR	[K].KVSEESFVPAVIEPSFGIGR.[I]	1xLabel:13C(6)15N(2) [K1]; 1xLabel:13C(6)15N(4) [R20]	1xLabel:13C(6)15N(2) [K1]; 1xLabel:13C(6)15N(4) [R20]			0.000134503	0	1	1	1	TGGT1_256990-t26_1-p1	transcript=TGGT1_256990-t26_1 | gene=TGGT1_256990 | organism=Toxoplasma_gondii_GT1 | gene_product=glycyl-tRNA synthetase | transcript_product=glycyl-tRNA synthetase | location=TGGT1_chrVIIb:4226828-4230134(+) | protein_length=771 | sequence_SO=chromosome | SO=protein_coding	TGGT1_256990-t26_1-p1 [604-623]	1	2166.16	20
FALSE	High	EVVASPVASASGAGSPGGATSLVFPVPIAR	[K].EVVASPVASASGAGSPGGATSLVFPVPIAR.[A]					1.48535e-06	0	1	1	1	TGGT1_216670-t26_1-p1	transcript=TGGT1_216670-t26_1 | gene=TGGT1_216670 | organism=Toxoplasma_gondii_GT1 | gene_product=FUSE-binding protein 2 / KH-type splicing regulatory protein | transcript_product=FUSE-binding protein 2 / KH-type splicing regulatory protein | location=TGGT1_chrXI:5891708-5895741(-) | protein_length=941 | sequence_SO=chromosome | SO=protein_coding	TGGT1_216670-t26_1-p1 [455-484]	0	2751.47	30	0.896	0.723	-0.16	-0.47	0.861058	0.43007	0.949046	0.620423	1.62	3.68	0.896	0.884	1.191	0.689	1.195	0.723	-0.16	-0.18	0.25	-0.54	0.26	-0.47	3277.07	3902.34	3039.34	3072.7	95.25	86.32	172.51	172.32	11255.6
FALSE	High	VEVENLMEGVDFSETLTR	[K].VEVENLMEGVDFSETLTR.[A]	1xLabel:13C(6)15N(4) [R18]	1xLabel:13C(6)15N(4) [R18]			1.50429e-07	0	1	1	8	TGGT1_311720-t26_1-p1	transcript=TGGT1_311720-t26_1 | gene=TGGT1_311720 | organism=Toxoplasma_gondii_GT1 | gene_product=chaperonin protein BiP | transcript_product=chaperonin protein BiP | location=TGGT1_chrXI:2188121-2191497(-) | protein_length=668 | sequence_SO=chromosome | SO=protein_coding	TGGT1_311720-t26_1-p1 [315-332]	0	2078	18
FALSE	High	MDAYNGSAVVAMAGK	[-].MDAYNGSAVVAMAGK.[D]	1xAcetyl [N-Term]	1xAcetyl [N-Term]	TGGT1_314090-t26_1-p1 1xAcetyl [N-Term]	TGGT1_314090-t26_1-p1 1xAcetyl [N-Term]	1.46564e-05	0	1	1	4	TGGT1_314090-t26_1-p1	transcript=TGGT1_314090-t26_1 | gene=TGGT1_314090 | organism=Toxoplasma_gondii_GT1 | gene_product=proteasome beta subunit | transcript_product=proteasome beta subunit | location=TGGT1_chrXI:3875155-3879686(-) | protein_length=205 | sequence_SO=chromosome | SO=protein_coding	TGGT1_314090-t26_1-p1 [1-15]	0	1526.7	15	0.619	0.64	-0.69	-0.64	0.058141	0.0210765	0.423966	0.210438	9.41	2.65	0.517	0.775	0.619	0.64	0.748	0.613	-0.95	-0.37	-0.69	-0.64	-0.42	-0.71	13878.9	8596.38	285779	213623	22.49	38.3	78.35	70.83	9096.71
FALSE	High	MDAYNGSAVVAMAGK	[-].MDAYNGSAVVAMAGK.[D]	1xAcetyl [N-Term]; 1xLabel:13C(6)15N(2) [K15]	1xAcetyl [N-Term]; 1xLabel:13C(6)15N(2) [K15]	TGGT1_314090-t26_1-p1 1xAcetyl [N-Term]	TGGT1_314090-t26_1-p1 1xAcetyl [N-Term]	4.58637e-05	0	1	1	2	TGGT1_314090-t26_1-p1	transcript=TGGT1_314090-t26_1 | gene=TGGT1_314090 | organism=Toxoplasma_gondii_GT1 | gene_product=proteasome beta subunit | transcript_product=proteasome beta subunit | location=TGGT1_chrXI:3875155-3879686(-) | protein_length=205 | sequence_SO=chromosome | SO=protein_coding	TGGT1_314090-t26_1-p1 [1-15]	0	1534.71	15
FALSE	High	EVSTQDLLAATALVARPQVDTSNLSASQK	[K].EVSTQDLLAATALVARPQVDTSNLSASQK.[K]					7.13662e-05	0	1	1	1	TGGT1_216670-t26_1-p1	transcript=TGGT1_216670-t26_1 | gene=TGGT1_216670 | organism=Toxoplasma_gondii_GT1 | gene_product=FUSE-binding protein 2 / KH-type splicing regulatory protein | transcript_product=FUSE-binding protein 2 / KH-type splicing regulatory protein | location=TGGT1_chrXI:5891708-5895741(-) | protein_length=941 | sequence_SO=chromosome | SO=protein_coding	TGGT1_216670-t26_1-p1 [42-70]	0	3013.58	29	1.081	2.037	0.11	1.03	0.79402	0.493543	0.919529	0.647223	71.09	100.9	2.39	0.562	1.081	3.423	2.037	0.554	1.26	-0.83	0.11	1.78	1.03	-0.85	11968.1	12102	2754.58	8183.81	42.25	29.69	172.14	168.14	5062.71
FALSE	High	EVVSESLAPSFAVTETHSSVQSPSK	[R].EVVSESLAPSFAVTETHSSVQSPSK.[Q]					0.000208513	0	1	1	1	TGGT1_319560-t26_1-p1	transcript=TGGT1_319560-t26_1 | gene=TGGT1_319560 | organism=Toxoplasma_gondii_GT1 | gene_product=microneme protein MIC3 | transcript_product=microneme protein MIC3 | location=TGGT1_chrIV:856315-857588(+) | protein_length=383 | sequence_SO=chromosome | SO=protein_coding	TGGT1_319560-t26_1-p1 [46-70]	0	2603.28	25
FALSE	High	KVDTIGLVFHPPNMFINVK	[K].KVDTIGLVFHPPNMFINVK.[L]					9.39768e-05	0	1	1	3	TGGT1_216650-t26_1-p1	transcript=TGGT1_216650-t26_1 | gene=TGGT1_216650 | organism=Toxoplasma_gondii_GT1 | gene_product=S15 sporozoite-expressed protein | transcript_product=S15 sporozoite-expressed protein | location=TGGT1_chrXI:5902644-5904672(-) | protein_length=400 | sequence_SO=chromosome | SO=protein_coding	TGGT1_216650-t26_1-p1 [241-259]	1	2169.19	19	1.178	0.599	0.24	-0.74	0.489893	0.0340905	0.783601	0.237106	39.45	0.77	1.178	1.492	0.854	0.591	0.762	0.599	0.24	0.58	-0.23	-0.76	-0.39	-0.74	4582.95	6837.91	281594	166326	67.17	69.12	105.9	100.43	9433.77
FALSE	High	LAALFTQHQTQEETPQK	[R].LAALFTQHQTQEETPQK.[G]					9.13714e-05	0	1	1	8	TGGT1_321400-t26_1-p1	transcript=TGGT1_321400-t26_1 | gene=TGGT1_321400 | organism=Toxoplasma_gondii_GT1 | gene_product=microsomal signal peptidase (spc12) domain-containing protein | transcript_product=microsomal signal peptidase (spc12) domain-containing protein | location=TGGT1_chrIb:1847078-1847464(+) | protein_length=128 | sequence_SO=chromosome | SO=protein_coding	TGGT1_321400-t26_1-p1 [95-111]	0	1970	17	0.305	0.733	-1.71	-0.45	0.181665	0.518511	0.621686	0.663605	7.65	7.98	0.136	0.894	0.305	92.563	0.733	0.659	-2.88	-0.16	-1.71	6.53	-0.45	-0.6	13903.6	7334.96	382491	280342	89.82	42.27	89.5	32.61	54057
FALSE	High	SAATQGLNAFNSDAVR	[K].SAATQGLNAFNSDAVR.[K]					2.16458e-05	0	1	1	4	TGGT1_243930-t26_1-p1	transcript=TGGT1_243930-t26_1 | gene=TGGT1_243930 | organism=Toxoplasma_gondii_GT1 | gene_product=hypothetical protein | transcript_product=hypothetical protein | location=TGGT1_chrVI:2808395-2813397(-) | protein_length=943 | sequence_SO=chromosome | SO=protein_coding	TGGT1_243930-t26_1-p1 [245-260]	0	1621.79	16	4.079	1.302	2.03	0.38	0.422103	0.14775	0.751502	0.465183	26.74	21.03	4.815	4.079	0.477	1.784	1.302	1.117	2.27	2.03	-1.07	0.84	0.38	0.16	6833.79	10994.2	289662	460966	66.92	86.25	89.21	70.68	6833.79
FALSE	High	RTPLEESQEPEGSTPDSQQSR	[R].RTPLEESQEPEGSTPDSQQSR.[G]	2xLabel:13C(6)15N(4) [R1; R21]	2xLabel:13C(6)15N(4) [R1; R21]			0.000101637	0	1	1	5	TGGT1_218520-t26_1-p1	transcript=TGGT1_218520-t26_1 | gene=TGGT1_218520 | organism=Toxoplasma_gondii_GT1 | gene_product=microneme protein MIC6 | transcript_product=microneme protein MIC6 | location=TGGT1_chrXII:1418869-1419918(-) | protein_length=349 | sequence_SO=chromosome | SO=protein_coding	TGGT1_218520-t26_1-p1 [244-264]	1	2378.1	21
FALSE	High	LPAMGGIPHDTYGMTTASIETYIHGILEK	[K].LPAMGGIPHDTYGMTTASIETYIHGILEK.[K]	1xOxidation [M4]	1xOxidation [M4]			9.63796e-05	0	1	1	1	TGGT1_249390-t26_1-p1	transcript=TGGT1_249390-t26_1 | gene=TGGT1_249390 | organism=Toxoplasma_gondii_GT1 | gene_product=glutamate/leucine/phenylalanine/valine dehydrogenase family protein | transcript_product=glutamate/leucine/phenylalanine/valine dehydrogenase family protein | location=TGGT1_chrXII:4441593-4452115(+) | protein_length=1206 | sequence_SO=chromosome | SO=protein_coding	TGGT1_249390-t26_1-p1 [818-846]	0	3132.54	29	1.821	0.177	0.86	-2.5	0.745925	0.13677	0.89812	0.451004	128.93	3.35	1.821	6.89	0.237	0.305	0.177	0.011	0.86	2.78	-2.07	-1.71	-2.5	-6.47	7100.49	12590.1	12436.4	3788.45	63.05	66.03	162.61	54.22	7100.49
FALSE	High	EQQQVQQHEQNEDR	[R].EQQQVQQHEQNEDR.[S]					0.000173724	0	1	1	4	TGGT1_286450-t26_1-p1	transcript=TGGT1_286450-t26_1 | gene=TGGT1_286450 | organism=Toxoplasma_gondii_GT1 | gene_product=dense granule protein GRA5 | transcript_product=dense granule protein GRA5 | location=TGGT1_chrV:1680404-1680766(+) | protein_length=120 | sequence_SO=chromosome | SO=protein_coding	TGGT1_286450-t26_1-p1 [45-58]	0	1795.8	14	0.952	1.042	-0.07	0.06	0.4279	0.441128	0.754413	0.624486	15.33	2.99	0.28	1.06	0.952	0.039	1.063	1.042	-1.84	0.08	-0.07	-4.67	0.09	0.06	10849.9	5279.16	557287	592591	148.8	160.91	130.82	140.47	10849.9
FALSE	High	LPAMGGIPHDTYGMTTASIETYIHGILEK	[K].LPAMGGIPHDTYGMTTASIETYIHGILEK.[K]	1xLabel:13C(6)15N(2) [K29]	1xLabel:13C(6)15N(2) [K29]			7.71701e-09	0	1	1	3	TGGT1_249390-t26_1-p1	transcript=TGGT1_249390-t26_1 | gene=TGGT1_249390 | organism=Toxoplasma_gondii_GT1 | gene_product=glutamate/leucine/phenylalanine/valine dehydrogenase family protein | transcript_product=glutamate/leucine/phenylalanine/valine dehydrogenase family protein | location=TGGT1_chrXII:4441593-4452115(+) | protein_length=1206 | sequence_SO=chromosome | SO=protein_coding	TGGT1_249390-t26_1-p1 [818-846]	0	3124.56	29	2.016	10.888	1.01	3.44	0.606515	0.174211	0.835515	0.493701	125.97	131.44	2.016	10.515	0.303	39.125	1.235	10.888	1.01	3.39	-1.72	5.29	0.3	3.44	8234	2496.03	7301.57	285674	78.45	163.29	168.2	93.89	551.469
FALSE	High	LPAMGGIPHDTYGMTTASIETYIHGILEK	[K].LPAMGGIPHDTYGMTTASIETYIHGILEK.[K]					5.30375e-08	0	1	1	3	TGGT1_249390-t26_1-p1	transcript=TGGT1_249390-t26_1 | gene=TGGT1_249390 | organism=Toxoplasma_gondii_GT1 | gene_product=glutamate/leucine/phenylalanine/valine dehydrogenase family protein | transcript_product=glutamate/leucine/phenylalanine/valine dehydrogenase family protein | location=TGGT1_chrXII:4441593-4452115(+) | protein_length=1206 | sequence_SO=chromosome | SO=protein_coding	TGGT1_249390-t26_1-p1 [818-846]	0	3116.54	29
FALSE	High	RTPLEESQEPEGSTPDSQQSR	[R].RTPLEESQEPEGSTPDSQQSR.[G]					7.34373e-05	0	1	1	5	TGGT1_218520-t26_1-p1	transcript=TGGT1_218520-t26_1 | gene=TGGT1_218520 | organism=Toxoplasma_gondii_GT1 | gene_product=microneme protein MIC6 | transcript_product=microneme protein MIC6 | location=TGGT1_chrXII:1418869-1419918(-) | protein_length=349 | sequence_SO=chromosome | SO=protein_coding	TGGT1_218520-t26_1-p1 [244-264]	1	2358.08	21	0.889	0.874	-0.17	-0.19	0.810181	0.383929	0.92732	0.606822	97.75	3.67	0.889	0.148	26.485	0.903	0.874	0.031	-0.17	-2.76	4.73	-0.15	-0.19	-5	149428	113206	262373	227621	83.13	67.39	57.63	106.65	157682
FALSE	High	LADEEFAELEEEIR	[K].LADEEFAELEEEIR.[A]	1xLabel:13C(6)15N(4) [R14]	1xLabel:13C(6)15N(4) [R14]			0.000100509	0	1	1	1	TGGT1_244370-t26_1-p1	transcript=TGGT1_244370-t26_1 | gene=TGGT1_244370 | organism=Toxoplasma_gondii_GT1 | gene_product=putative TDC1 | transcript_product=putative TDC1 | location=TGGT1_chrVI:3132400-3134154(+) | protein_length=584 | sequence_SO=chromosome | SO=protein_coding	TGGT1_244370-t26_1-p1 [366-379]	0	1702.8	14	0.414	17.613	-1.27	4.14	0.608377	0.273522	0.83637	0.563884	18.09	143.76	0.414	0.12	3.431	49.59	0.535	17.613	-1.27	-3.06	1.78	5.63	-0.9	4.14	8060.05	4063.84	6840.46	73896.1	75.08	61.2	65.37	87.97	11167.5
FALSE	High	LADEELLGPMLDVSK	[R].LADEELLGPMLDVSK.[G]					2.76288e-06	0	1	1	6	TGGT1_219850-t26_1-p1	transcript=TGGT1_219850-t26_1 | gene=TGGT1_219850 | organism=Toxoplasma_gondii_GT1 | gene_product=prolyl-tRNA synthetase (ProRS) | transcript_product=prolyl-tRNA synthetase (ProRS) | location=TGGT1_chrXII:529404-538395(-) | protein_length=830 | sequence_SO=chromosome | SO=protein_coding	TGGT1_219850-t26_1-p1 [215-229]	0	1629.84	15	0.611	0.702	-0.71	-0.51	0.981141	0.0174106	0.992104	0.20435	24.63	1.86	0.34	5.143	0.611	0.608	0.72	0.702	-1.56	2.36	-0.71	-0.72	-0.47	-0.51	13092	8546.41	1.00052e+06	683310	64.12	50.5	81.68	85.12	13092
FALSE	High	LADEELLGPMLDVSK	[R].LADEELLGPMLDVSK.[G]	1xLabel:13C(6)15N(2) [K15]	1xLabel:13C(6)15N(2) [K15]			5.61482e-06	0	1	1	5	TGGT1_219850-t26_1-p1	transcript=TGGT1_219850-t26_1 | gene=TGGT1_219850 | organism=Toxoplasma_gondii_GT1 | gene_product=prolyl-tRNA synthetase (ProRS) | transcript_product=prolyl-tRNA synthetase (ProRS) | location=TGGT1_chrXII:529404-538395(-) | protein_length=830 | sequence_SO=chromosome | SO=protein_coding	TGGT1_219850-t26_1-p1 [215-229]	0	1637.85	15
FALSE	High	EQMGQSLLGQAATTPAGR	[R].EQMGQSLLGQAATTPAGR.[A]	1xLabel:13C(6)15N(4) [R18]	1xLabel:13C(6)15N(4) [R18]			0.000132698	0	1	1	2	TGGT1_273520-t26_1-p1	transcript=TGGT1_273520-t26_1 | gene=TGGT1_273520 | organism=Toxoplasma_gondii_GT1 | gene_product=PCI domain-containing protein | transcript_product=PCI domain-containing protein | location=TGGT1_chrVIII:3416534-3423842(+) | protein_length=601 | sequence_SO=chromosome | SO=protein_coding	TGGT1_273520-t26_1-p1 [52-69]	0	1825.91	18
FALSE	High	EQMGQSLLGQAATTPAGR	[R].EQMGQSLLGQAATTPAGR.[A]					6.27122e-05	0	1	1	2	TGGT1_273520-t26_1-p1	transcript=TGGT1_273520-t26_1 | gene=TGGT1_273520 | organism=Toxoplasma_gondii_GT1 | gene_product=PCI domain-containing protein | transcript_product=PCI domain-containing protein | location=TGGT1_chrVIII:3416534-3423842(+) | protein_length=601 | sequence_SO=chromosome | SO=protein_coding	TGGT1_273520-t26_1-p1 [52-69]	0	1815.9	18	0.997	0.873	0	-0.2	0.58956	0.000744091	0.828843	0.177261	34.65	0.6	0.997	1.232	0.459	0.88	0.869	0.873	0	0.3	-1.12	-0.18	-0.2	-0.2	7318.38	7297.38	486611	422679	19.19	30.52	75.74	75.7	7318.38
FALSE	High	TEALTTLAHADSAFEDSTLAER	[K].TEALTTLAHADSAFEDSTLAER.[L]	1xLabel:13C(6)15N(4) [R22]	1xLabel:13C(6)15N(4) [R22]			0.000199034	0	1	1	1	TGGT1_258070-t26_1-p1	transcript=TGGT1_258070-t26_1 | gene=TGGT1_258070 | organism=Toxoplasma_gondii_GT1 | gene_product=hypothetical protein | transcript_product=hypothetical protein | location=TGGT1_chrVIIb:3570890-3578893(-) | protein_length=678 | sequence_SO=chromosome | SO=protein_coding	TGGT1_258070-t26_1-p1 [348-369]	0	2359.13	22
FALSE	High	VGTPAASGAASWGAQGAGEGAEGPTR	[R].VGTPAASGAASWGAQGAGEGAEGPTR.[G]					0.000152503	0	1	1	2	TGGT1_243960-t26_1-p1	transcript=TGGT1_243960-t26_1 | gene=TGGT1_243960 | organism=Toxoplasma_gondii_GT1 | gene_product=nuclear transport factor 2 (ntf2) domain-containing protein | transcript_product=nuclear transport factor 2 (ntf2) domain-containing protein | location=TGGT1_chrVI:2828443-2833407(-) | protein_length=797 | sequence_SO=chromosome | SO=protein_coding	TGGT1_243960-t26_1-p1 [549-574]	0	2313.09	26
FALSE	High	EQISVDVPSLDNAILNIR	[K].EQISVDVPSLDNAILNIR.[Q]					8.1139e-05	0	1	1	2	TGGT1_301440-t26_1-p1	transcript=TGGT1_301440-t26_1 | gene=TGGT1_301440 | organism=Toxoplasma_gondii_GT1 | gene_product=calcium-dependent protein kinase CDPK1 | transcript_product=calcium-dependent protein kinase CDPK1 | location=TGGT1_chrIV:2366836-2372193(+) | protein_length=582 | sequence_SO=chromosome | SO=protein_coding	TGGT1_301440-t26_1-p1 [389-406]	0	1996.07	18	0.293	0.755	-1.77	-0.41	0.0183117	0.0254214	0.274664	0.217751	3.58	3.36	0.293	0.211	0.381	0.755	0.836	0.725	-1.77	-2.25	-1.39	-0.41	-0.26	-0.46	12124.7	4622.18	555268	464163	97.9	70.97	76.61	70.95	9895.57
FALSE	High	SIQMEGVTWGEGMK	[K].SIQMEGVTWGEGMK.[K]					2.69983e-05	0	1	1	6	TGGT1_219140-t26_1-p1	transcript=TGGT1_219140-t26_1 | gene=TGGT1_219140 | organism=Toxoplasma_gondii_GT1 | gene_product=EF-1 guanine nucleotide exchange domain-containing protein | transcript_product=EF-1 guanine nucleotide exchange domain-containing protein | location=TGGT1_chrXII:1048475-1050088(+) | protein_length=187 | sequence_SO=chromosome | SO=protein_coding	TGGT1_219140-t26_1-p1 [99-112]	0	1552.71	14
FALSE	High	EQSPGGEAQPDHPTK	[K].EQSPGGEAQPDHPTK.[G]					0.000107152	0	1	1	8	TGGT1_291890-t26_1-p1	transcript=TGGT1_291890-t26_1 | gene=TGGT1_291890 | organism=Toxoplasma_gondii_GT1 | gene_product=microneme protein MIC1 | transcript_product=microneme protein MIC1 | location=TGGT1_chrIX:4200849-4203191(-) | protein_length=456 | sequence_SO=chromosome | SO=protein_coding	TGGT1_291890-t26_1-p1 [288-302]	0	1577.72	15
FALSE	High	MGLVGLPNVGK	[K].MGLVGLPNVGK.[S]	1xLabel:13C(6)15N(2) [K11]	1xLabel:13C(6)15N(2) [K11]			0.000207502	0	1	1	4	TGGT1_214350-t26_1-p1	transcript=TGGT1_214350-t26_1 | gene=TGGT1_214350 | organism=Toxoplasma_gondii_GT1 | gene_product=putative GTP-binding protein | transcript_product=putative GTP-binding protein | location=TGGT1_chrX:6150425-6154448(+) | protein_length=396 | sequence_SO=chromosome | SO=protein_coding	TGGT1_214350-t26_1-p1 [24-34]	0	1092.63	11
FALSE	High	EQSPGGEAQPDHPTK	[K].EQSPGGEAQPDHPTK.[G]	1xLabel:13C(6)15N(2) [K15]	1xLabel:13C(6)15N(2) [K15]			0.000103927	0	1	1	5	TGGT1_291890-t26_1-p1	transcript=TGGT1_291890-t26_1 | gene=TGGT1_291890 | organism=Toxoplasma_gondii_GT1 | gene_product=microneme protein MIC1 | transcript_product=microneme protein MIC1 | location=TGGT1_chrIX:4200849-4203191(-) | protein_length=456 | sequence_SO=chromosome | SO=protein_coding	TGGT1_291890-t26_1-p1 [288-302]	0	1585.73	15	0.675	0.747	-0.57	-0.42	0.0959798	0.0109965	0.514501	0.199491	6.94	1.88	0.675	0.744	0.427	0.73	0.804	0.747	-0.57	-0.43	-1.23	-0.45	-0.31	-0.42	48597.8	36179.5	748093	577133	55.22	66.14	74.82	73.27	95412.9
FALSE	High	EQVGSSELLLGPAEIK	[K].EQVGSSELLLGPAEIK.[S]					0.000120968	0	1	1	1	TGGT1_258170-t26_1-p1	transcript=TGGT1_258170-t26_1 | gene=TGGT1_258170 | organism=Toxoplasma_gondii_GT1 | gene_product=hypothetical protein | transcript_product=hypothetical protein | location=TGGT1_chrVIIb:3499824-3505217(+) | protein_length=408 | sequence_SO=chromosome | SO=protein_coding	TGGT1_258170-t26_1-p1 [150-165]	0	1669.9	16
FALSE	High	ESATAEEEEVAEEE	[K].ESATAEEEEVAEEE.[-]					9.88831e-06	0	1	1	62	TGGT1_286450-t26_1-p1	transcript=TGGT1_286450-t26_1 | gene=TGGT1_286450 | organism=Toxoplasma_gondii_GT1 | gene_product=dense granule protein GRA5 | transcript_product=dense granule protein GRA5 | location=TGGT1_chrV:1680404-1680766(+) | protein_length=120 | sequence_SO=chromosome | SO=protein_coding	TGGT1_286450-t26_1-p1 [107-120]	0	1551.62	14
FALSE	High	MFSECCQPCAPCGEGEPGAAQPTQVPGSR	[-].MFSECCQPCAPCGEGEPGAAQPTQVPGSR.[L]	1xAcetyl [N-Term]	1xAcetyl [N-Term]	TGGT1_231630-t26_1-p1 1xAcetyl [N-Term]	TGGT1_231630-t26_1-p1 1xAcetyl [N-Term]	3.55766e-05	0	1	1	1	TGGT1_231630-t26_1-p1	transcript=TGGT1_231630-t26_1 | gene=TGGT1_231630 | organism=Toxoplasma_gondii_GT1 | gene_product=alveolin domain containing intermediate filament IMC4 | transcript_product=alveolin domain containing intermediate filament IMC4 | location=TGGT1_chrVIII:1508307-1510463(-) | protein_length=452 | sequence_SO=chromosome | SO=protein_coding	TGGT1_231630-t26_1-p1 [1-29]	0	2979.22	29
FALSE	High	VGGEEALSEVQR	[K].VGGEEALSEVQR.[T]	1xLabel:13C(6)15N(4) [R12]	1xLabel:13C(6)15N(4) [R12]			4.41601e-05	0	1	1	4	TGGT1_259550-t26_1-p1	transcript=TGGT1_259550-t26_1 | gene=TGGT1_259550 | organism=Toxoplasma_gondii_GT1 | gene_product=dihydropteroate synthase | transcript_product=dihydropteroate synthase | location=TGGT1_chrVIIb:2750606-2755609(-) | protein_length=748 | sequence_SO=chromosome | SO=protein_coding	TGGT1_259550-t26_1-p1 [414-425]	0	1283.65	12
FALSE	High	LADDAATQPLVVQHIQK	[K].LADDAATQPLVVQHIQK.[F]	1xLabel:13C(6)15N(2) [K17]	1xLabel:13C(6)15N(2) [K17]			0.000131268	0	1	1	3	TGGT1_231600-t26_1-p1	transcript=TGGT1_231600-t26_1 | gene=TGGT1_231600 | organism=Toxoplasma_gondii_GT1 | gene_product=HEAT repeat-containing protein | transcript_product=HEAT repeat-containing protein | location=TGGT1_chrVIII:1475035-1486295(-) | protein_length=1169 | sequence_SO=chromosome | SO=protein_coding	TGGT1_231600-t26_1-p1 [1088-1104]	0	1855.02	17
FALSE	High	ERPAPVSEPAAASPSVGAEASSTTFSASPATR	[K].ERPAPVSEPAAASPSVGAEASSTTFSASPATR.[R]	2xLabel:13C(6)15N(4) [R2; R32]	2xLabel:13C(6)15N(4) [R2; R32]			8.34742e-05	0	1	1	2	TGGT1_319920-t26_1-p1	transcript=TGGT1_319920-t26_1 | gene=TGGT1_319920 | organism=Toxoplasma_gondii_GT1 | gene_product=2-oxo acid dehydrogenases acyltransferase (catalytic domain) domain-containing protein | transcript_product=2-oxo acid dehydrogenases acyltransferase (catalytic domain) domain-containing protein | location=TGGT1_chrIV:604302-610675(-) | protein_length=669 | sequence_SO=chromosome | SO=protein_coding	TGGT1_319920-t26_1-p1 [163-194]	0	3106.52	32
FALSE	High	TEEITEGAEAR	[K].TEEITEGAEAR.[E]					0.00016455	0	1	1	6	TGGT1_215220-t26_1-p1	transcript=TGGT1_215220-t26_1 | gene=TGGT1_215220 | organism=Toxoplasma_gondii_GT1 | gene_product=hypothetical protein | transcript_product=hypothetical protein | location=TGGT1_chrX:6716950-6719044(+) | protein_length=502 | sequence_SO=chromosome | SO=protein_coding	TGGT1_215220-t26_1-p1 [217-227]	0	1205.56	11	0.905	0.969	-0.14	-0.04	0.738827	0.682497	0.894503	0.775774	81.15	14.24	0.905	0.3	13.517	0.969	0.87	1.084	-0.14	-1.74	3.76	-0.04	-0.2	0.12	11756.3	88025.1	513490	497730	126.9	93.89	43.26	52.78	97298.9
FALSE	High	MGAEVAGDSIGDEFK	[R].MGAEVAGDSIGDEFK.[G]					4.86223e-07	0	1	1	12	TGGT1_210690-t26_1-p1	transcript=TGGT1_210690-t26_1 | gene=TGGT1_210690 | organism=Toxoplasma_gondii_GT1 | gene_product=ribosomal protein RPS6 | transcript_product=ribosomal protein RPS6 | location=TGGT1_chrIV:2087216-2087986(+) | protein_length=256 | sequence_SO=chromosome | SO=protein_coding	TGGT1_210690-t26_1-p1 [32-46]	0	1525.68	15
FALSE	High	ERLPAIPVLPLATVGGLPASQTLIEEK	[R].ERLPAIPVLPLATVGGLPASQTLIEEK.[V]					4.09358e-05	0	1	1	1	TGGT1_260540-t26_1-p1	transcript=TGGT1_260540-t26_1 | gene=TGGT1_260540 | organism=Toxoplasma_gondii_GT1 | gene_product=alveolin domain containing intermediate filament IMC14 | transcript_product=alveolin domain containing intermediate filament IMC14 | location=TGGT1_chrVIIb:2144399-2148137(+) | protein_length=733 | sequence_SO=chromosome | SO=protein_coding	TGGT1_260540-t26_1-p1 [13-39]	1	2812.62	27	0.952	3.072	-0.07	1.62	0.700114	0.307675	0.877784	0.58373	86.31	113.42	0.952	0.34	13.208	10.364	3.072	0.722	-0.07	-1.56	3.72	3.37	1.62	-0.47	5143.75	4895.86	2175.18	7456.11	89.49	40.83	171.77	163.79	5143.75
FALSE	High	ERLEDEEAAPHTAQADATQWGADAAAADWK	[K].ERLEDEEAAPHTAQADATQWGADAAAADWK.[Q]					1.02763e-05	0	1	1	1	TGGT1_266060-t26_1-p1	transcript=TGGT1_266060-t26_1 | gene=TGGT1_266060 | organism=Toxoplasma_gondii_GT1 | gene_product=ribosomal protein RPSA | transcript_product=ribosomal protein RPSA | location=TGGT1_chrIX:1148543-1150882(-) | protein_length=287 | sequence_SO=chromosome | SO=protein_coding	TGGT1_266060-t26_1-p1 [216-245]	1	3224.45	30	0.046	0.426	-4.43	-1.23	0.0307854	0.609953	0.327956	0.724452	0.23	25.78	0.093	0.046	0.013	0.426	6.37	0.017	-3.42	-4.43	-6.32	-1.23	2.67	-5.88	222119	5754.31	18425.8	8282.53	79.19	37.18	163.25	3.31	61728.2
FALSE	High	ERELVTEGESIVAVHGMK	[K].ERELVTEGESIVAVHGMK.[E]	1xLabel:13C(6)15N(2) [K18]; 1xLabel:13C(6)15N(4) [R2]	1xLabel:13C(6)15N(2) [K18]; 1xLabel:13C(6)15N(4) [R2]			6.73885e-05	0	1	1	3	TGGT1_256760-t26_1-p1	transcript=TGGT1_256760-t26_1 | gene=TGGT1_256760 | organism=Toxoplasma_gondii_GT1 | gene_product=pyruvate kinase PyK1 | transcript_product=pyruvate kinase PyK1 | location=TGGT1_chrVIIb:4413512-4417055(-) | protein_length=531 | sequence_SO=chromosome | SO=protein_coding	TGGT1_256760-t26_1-p1 [498-515]	1	2002.04	18
FALSE	High	ERELVTEGESIVAVHGMK	[K].ERELVTEGESIVAVHGMK.[E]					8.70941e-05	0	1	1	3	TGGT1_256760-t26_1-p1	transcript=TGGT1_256760-t26_1 | gene=TGGT1_256760 | organism=Toxoplasma_gondii_GT1 | gene_product=pyruvate kinase PyK1 | transcript_product=pyruvate kinase PyK1 | location=TGGT1_chrVIIb:4413512-4417055(-) | protein_length=531 | sequence_SO=chromosome | SO=protein_coding	TGGT1_256760-t26_1-p1 [498-515]	1	1984.02	18	0.343	0.021	-1.54	-5.6	0.872957	0.044374	0.953076	0.255898	10.42	0.03	0.138	0.343	10.35	0.055	0.021	0.01	-2.86	-1.54	3.37	-4.18	-5.6	-6.64	10215.1	8400.91	295308	6081.15	98.05	75.58	100.41	44.91	10215.1
FALSE	High	ERADLIAYLVDASNK	[K].ERADLIAYLVDASNK.[-]	1xLabel:13C(6)15N(2) [K15]; 1xLabel:13C(6)15N(4) [R2]	1xLabel:13C(6)15N(2) [K15]; 1xLabel:13C(6)15N(4) [R2]			0.000175066	0	1	1	1	TGGT1_219750-t26_1-p1	transcript=TGGT1_219750-t26_1 | gene=TGGT1_219750 | organism=Toxoplasma_gondii_GT1 | gene_product=putative cytochrome c | transcript_product=putative cytochrome c | location=TGGT1_chrXII:601202-602193(-) | protein_length=115 | sequence_SO=chromosome | SO=protein_coding	TGGT1_219750-t26_1-p1 [101-115]	1	1695.9	15	1.957	0.794	0.97	-0.33	0.874842	0.746421	0.953681	0.820018	5.74	78.45	2.033	1.957	0.344	0.128	3.417	0.794	1.02	0.97	-1.54	-2.96	1.77	-0.33	4975.19	7004.42	3994.74	7323.58	62.93	44.04	171	169.69	4975.19
FALSE	High	MGAEVAGDSIGDEFK	[R].MGAEVAGDSIGDEFK.[G]	1xLabel:13C(6)15N(2) [K15]	1xLabel:13C(6)15N(2) [K15]			5.52459e-07	0	1	1	11	TGGT1_210690-t26_1-p1	transcript=TGGT1_210690-t26_1 | gene=TGGT1_210690 | organism=Toxoplasma_gondii_GT1 | gene_product=ribosomal protein RPS6 | transcript_product=ribosomal protein RPS6 | location=TGGT1_chrIV:2087216-2087986(+) | protein_length=256 | sequence_SO=chromosome | SO=protein_coding	TGGT1_210690-t26_1-p1 [32-46]	0	1533.7	15	2.977	0.786	1.57	-0.35	0.496676	0.824416	0.787015	0.876977	37.49	14.84	2.977	3.73	0.462	0.786	1.579	0.659	1.57	1.9	-1.11	-0.35	0.66	-0.6	3663.07	10905.2	1.51676e+06	2.13529e+06	68.85	42.32	83.78	52.5	3663.07
FALSE	High	VGIEQTHDAGTPITEPMK	[K].VGIEQTHDAGTPITEPMK.[V]					3.94951e-07	0	1	1	9	TGGT1_316310-t26_1-p1	transcript=TGGT1_316310-t26_1 | gene=TGGT1_316310 | organism=Toxoplasma_gondii_GT1 | gene_product=superoxide dismutase | transcript_product=superoxide dismutase | location=TGGT1_chrXI:5175968-5177674(-) | protein_length=201 | sequence_SO=chromosome | SO=protein_coding	TGGT1_316310-t26_1-p1 [138-155]	0	1923.95	18	0.372	0.687	-1.43	-0.54	0.637764	0.0503399	0.849393	0.267584	11.05	5.88	3.524	0.372	0.171	0.687	0.745	0.532	1.82	-1.43	-2.55	-0.54	-0.43	-0.91	10664	3963.73	1.23409e+06	919052	66.25	57.61	57.89	41.55	2006.01
FALSE	High	VGIEQTHDAGTPITEPMK	[K].VGIEQTHDAGTPITEPMK.[V]	1xLabel:13C(6)15N(2) [K18]	1xLabel:13C(6)15N(2) [K18]			3.00234e-06	0	1	1	6	TGGT1_316310-t26_1-p1	transcript=TGGT1_316310-t26_1 | gene=TGGT1_316310 | organism=Toxoplasma_gondii_GT1 | gene_product=superoxide dismutase | transcript_product=superoxide dismutase | location=TGGT1_chrXI:5175968-5177674(-) | protein_length=201 | sequence_SO=chromosome | SO=protein_coding	TGGT1_316310-t26_1-p1 [138-155]	0	1931.96	18
FALSE	High	MGAEVAGDSIGDEFK	[R].MGAEVAGDSIGDEFK.[G]	1xOxidation [M1]; 1xLabel:13C(6)15N(2) [K15]	1xOxidation [M1]; 1xLabel:13C(6)15N(2) [K15]			6.64849e-06	0	1	1	4	TGGT1_210690-t26_1-p1	transcript=TGGT1_210690-t26_1 | gene=TGGT1_210690 | organism=Toxoplasma_gondii_GT1 | gene_product=ribosomal protein RPS6 | transcript_product=ribosomal protein RPS6 | location=TGGT1_chrIV:2087216-2087986(+) | protein_length=256 | sequence_SO=chromosome | SO=protein_coding	TGGT1_210690-t26_1-p1 [32-46]	0	1549.69	15
FALSE	High	MGMISQQEVDDIVQR	[K].MGMISQQEVDDIVQR.[T]					6.70787e-06	0	1	1	5	TGGT1_318430-t26_1-p1	transcript=TGGT1_318430-t26_1 | gene=TGGT1_318430 | organism=Toxoplasma_gondii_GT1 | gene_product=malate dehydrogenase MDH | transcript_product=malate dehydrogenase MDH | location=TGGT1_chrIV:1282502-1286316(-) | protein_length=511 | sequence_SO=chromosome | SO=protein_coding	TGGT1_318430-t26_1-p1 [395-409]	0	1748.83	15	3.045	0.911	1.61	-0.13	0.0736762	0.567818	0.463671	0.694348	57.98	15.37	5.923	1.854	3.045	0.911	1.124	0.797	2.57	0.89	1.61	-0.13	0.17	-0.33	12209.9	34197.9	619178	695663	37.66	25.77	78.13	63.43	5773.89
FALSE	High	SIQMEGVTWGEGMK	[K].SIQMEGVTWGEGMK.[K]	1xLabel:13C(6)15N(2) [K14]	1xLabel:13C(6)15N(2) [K14]			1.34121e-05	0	1	1	2	TGGT1_219140-t26_1-p1	transcript=TGGT1_219140-t26_1 | gene=TGGT1_219140 | organism=Toxoplasma_gondii_GT1 | gene_product=EF-1 guanine nucleotide exchange domain-containing protein | transcript_product=EF-1 guanine nucleotide exchange domain-containing protein | location=TGGT1_chrXII:1048475-1050088(+) | protein_length=187 | sequence_SO=chromosome | SO=protein_coding	TGGT1_219140-t26_1-p1 [99-112]	0	1560.73	14	7.092	0.759	2.83	-0.4	0.188286	0.024209	0.626424	0.215357	59.94	4.39	9.959	0.989	7.092	0.681	0.798	0.759	3.32	-0.02	2.83	-0.55	-0.33	-0.4	1349.95	13190.6	374446	264229	135.86	36.64	85.71	87.44	1349.95
FALSE	High	VGVVLSGGQAAGGHNVICGIFDYVK	[R].VGVVLSGGQAAGGHNVICGIFDYVK.[R]					4.12447e-06	0	1	1	4	TGGT1_226960-t26_1-p1	transcript=TGGT1_226960-t26_1 | gene=TGGT1_226960 | organism=Toxoplasma_gondii_GT1 | gene_product=phosphofructokinase PFKII | transcript_product=phosphofructokinase PFKII | location=TGGT1_chrX:1093641-1104060(-) | protein_length=1225 | sequence_SO=chromosome | SO=protein_coding	TGGT1_226960-t26_1-p1 [133-157]	0	2460.27	25	0.777	0.714	-0.36	-0.49	0.742051	0.0169973	0.895674	0.20435	49.47	2.85	0.348	0.777	2.064	0.714	0.79	0.687	-1.52	-0.36	1.05	-0.49	-0.34	-0.54	10683	8059.15	427449	305356	48.48	34.71	133.84	131.35	11752.3
FALSE	High	MGSMGNYVAQPEGGMEIPTQYDYSQLQQQVSR	[R].MGSMGNYVAQPEGGMEIPTQYDYSQLQQQVSR.[E]	1xPhospho [Y/S]; 1xLabel:13C(6)15N(4) [R32]	1xPhospho [S3; Y7]; 1xLabel:13C(6)15N(4) [R32]	TGGT1_219270-t26_1-p1 1xPhospho [Y/S]	TGGT1_219270-t26_1-p1 1xPhospho [S348; Y352]	6.38054e-05	0	1	1	2	TGGT1_219270-t26_1-p1	transcript=TGGT1_219270-t26_1 | gene=TGGT1_219270 | organism=Toxoplasma_gondii_GT1 | gene_product=multi-pass transmembrane protein | transcript_product=multi-pass transmembrane protein | location=TGGT1_chrXII:948336-949904(+) | protein_length=389 | sequence_SO=chromosome | SO=protein_coding	TGGT1_219270-t26_1-p1 [346-377]	0	3682.59	32
FALSE	High	MGSMGNYVAQPEGGMEIPTQYDYSQLQQQVSR	[R].MGSMGNYVAQPEGGMEIPTQYDYSQLQQQVSR.[E]	2xPhospho [Y7; T19]; 1xOxidation [M]; 1xLabel:13C(6)15N(4) [R32]	2xPhospho [Y7; T19]; 1xOxidation [M1; M4; M15]; 1xLabel:13C(6)15N(4) [R32]	TGGT1_219270-t26_1-p1 2xPhospho [Y352; T364]	TGGT1_219270-t26_1-p1 2xPhospho [Y352; T364]	0.000162845	0	1	1	12	TGGT1_219270-t26_1-p1	transcript=TGGT1_219270-t26_1 | gene=TGGT1_219270 | organism=Toxoplasma_gondii_GT1 | gene_product=multi-pass transmembrane protein | transcript_product=multi-pass transmembrane protein | location=TGGT1_chrXII:948336-949904(+) | protein_length=389 | sequence_SO=chromosome | SO=protein_coding	TGGT1_219270-t26_1-p1 [346-377]	0	3778.55	32	100	1.658	6.64	0.73	0.00668899	0.853883	0.232219	0.899275	0	24.74	100	100	100	1.934	0.422	1.658	6.64	6.64	6.64	0.95	-1.24	0.73	6986.9	750872	4449.29	8445.67	54.65	115.71	31.72	69.63	2509.48
FALSE	High	VGYNPEKVPFVAISGFVGDNMVEK	[K].VGYNPEKVPFVAISGFVGDNMVEK.[S]	2xLabel:13C(6)15N(2) [K7; K24]	2xLabel:13C(6)15N(2) [K7; K24]			1.55953e-05	0	2	4	5	TGGT1_294800B-t26_1-p1; TGGT1_286420A-t26_1-p1	transcript=TGGT1_294800B-t26_1 | gene=TGGT1_294800B | organism=Toxoplasma_gondii_GT1 | gene_product=putative elongation factor 1-alpha (EF-1-ALPHA) | transcript_product=putative elongation factor 1-alpha (EF-1-ALPHA) | location=TGGT1_chrIa:1133102-1134034(-) | protein_length=310 | sequence_SO=chromosome | SO=protein_coding transcript=TGGT1_286420A-t26_1 | gene=TGGT1_286420A | organism=Toxoplasma_…	TGGT1_294800B-t26_1-p1 [41-64]; TGGT1_286420A-t26_1-p1 [179-202]	1	2612.34	24
FALSE	High	EQEQAVEKPSVEGVK	[R].EQEQAVEKPSVEGVK.[A]	2xLabel:13C(6)15N(2) [K8; K15]	2xLabel:13C(6)15N(2) [K8; K15]			9.08584e-05	0	1	1	7	TGGT1_299050-t26_1-p1	transcript=TGGT1_299050-t26_1 | gene=TGGT1_299050 | organism=Toxoplasma_gondii_GT1 | gene_product=ribosomal protein RPL17 | transcript_product=ribosomal protein RPL17 | location=TGGT1_chrIII:2205438-2207707(-) | protein_length=195 | sequence_SO=chromosome | SO=protein_coding	TGGT1_299050-t26_1-p1 [158-172]	0	1672.87	15
FALSE	High	EQEQAVEKPSVEGVK	[R].EQEQAVEKPSVEGVK.[A]					4.22709e-05	0	1	1	16	TGGT1_299050-t26_1-p1	transcript=TGGT1_299050-t26_1 | gene=TGGT1_299050 | organism=Toxoplasma_gondii_GT1 | gene_product=ribosomal protein RPL17 | transcript_product=ribosomal protein RPL17 | location=TGGT1_chrIII:2205438-2207707(-) | protein_length=195 | sequence_SO=chromosome | SO=protein_coding	TGGT1_299050-t26_1-p1 [158-172]	0	1656.84	15	0.579	0.684	-0.79	-0.55	0.0182846	0.0945023	0.274664	0.370857	2.59	9.41	0.579	0.691	0.549	0.684	0.876	0.591	-0.79	-0.53	-0.86	-0.55	-0.19	-0.76	425839	263540	2.65907e+06	2.27729e+06	22.54	18.94	24.77	16.56	580214
FALSE	High	EQEPEIWNAIR	[K].EQEPEIWNAIR.[F]					0.000189375	0	1	1	8	TGGT1_289650-t26_1-p1	transcript=TGGT1_289650-t26_1 | gene=TGGT1_289650 | organism=Toxoplasma_gondii_GT1 | gene_product=PEP-carboxykinase I | transcript_product=PEP-carboxykinase I | location=TGGT1_chrIX:3173228-3176423(+) | protein_length=677 | sequence_SO=chromosome | SO=protein_coding	TGGT1_289650-t26_1-p1 [426-436]	0	1384.69	11
FALSE	High	LADLPGLGHPTLYIR	[K].LADLPGLGHPTLYIR.[I]					8.44256e-05	0	1	1	4	TGGT1_306060-t26_1-p1	transcript=TGGT1_306060-t26_1 | gene=TGGT1_306060 | organism=Toxoplasma_gondii_GT1 | gene_product=rhoptry neck protein RON8 | transcript_product=rhoptry neck protein RON8 | location=TGGT1_chrIX:5560917-5575203(-) | protein_length=2980 | sequence_SO=chromosome | SO=protein_coding	TGGT1_306060-t26_1-p1 [1680-1694]	0	1635.92	15
FALSE	High	LADLPGLGHPTLYIR	[K].LADLPGLGHPTLYIR.[I]	1xLabel:13C(6)15N(4) [R15]	1xLabel:13C(6)15N(4) [R15]			0.000196102	0	1	1	2	TGGT1_306060-t26_1-p1	transcript=TGGT1_306060-t26_1 | gene=TGGT1_306060 | organism=Toxoplasma_gondii_GT1 | gene_product=rhoptry neck protein RON8 | transcript_product=rhoptry neck protein RON8 | location=TGGT1_chrIX:5560917-5575203(-) | protein_length=2980 | sequence_SO=chromosome | SO=protein_coding	TGGT1_306060-t26_1-p1 [1680-1694]	0	1645.93	15	18.267	0.82	4.19	-0.29	0.00200626	0.0384391	0.205517	0.243005	21.97	6.49	18.267	20.974	13.591	0.82	0.767	0.88	4.19	4.39	3.76	-0.29	-0.38	-0.18	6236.95	113932	418818	343422	55.33	31.82	61.23	67.73	6236.95
FALSE	High	LADTSLETVCTLPEFHR	[K].LADTSLETVCTLPEFHR.[A]					2.10786e-05	0	1	1	1	TGGT1_243800-t26_1-p1	transcript=TGGT1_243800-t26_1 | gene=TGGT1_243800 | organism=Toxoplasma_gondii_GT1 | gene_product=putative long-chain fatty acid CoA ligase | transcript_product=putative long-chain fatty acid CoA ligase | location=TGGT1_chrVI:2778396-2788707(-) | protein_length=758 | sequence_SO=chromosome | SO=protein_coding	TGGT1_243800-t26_1-p1 [670-686]	0	1931.95	17	1.708	0.702	0.77	-0.51	0.787849	0.879496	0.917106	0.918204	133.62	34	1.708	10.427	0.169	2.797	0.375	0.702	0.77	3.38	-2.57	1.48	-1.41	-0.51	2164.8	3696.97	7954.51	3852.57	98.15	71.04	170.95	170.85	2164.8
FALSE	High	RSPQEPSGDGGGNDAGNNAGNGGNEGR	[R].RSPQEPSGDGGGNDAGNNAGNGGNEGR.[G]					1.32683e-06	0	1	1	3	TGGT1_275440-t26_1-p1	transcript=TGGT1_275440-t26_1 | gene=TGGT1_275440 | organism=Toxoplasma_gondii_GT1 | gene_product=dense granule protein GRA6 | transcript_product=dense granule protein GRA6 | location=TGGT1_chrX:7158307-7158999(-) | protein_length=223 | sequence_SO=chromosome | SO=protein_coding	TGGT1_275440-t26_1-p1 [177-203]	1	2541.07	27
FALSE	High	LADVLPSATFQETSSAHVFSVK	[K].LADVLPSATFQETSSAHVFSVK.[E]					3.79566e-06	0	1	1	7	TGGT1_315320-t26_1-p1	transcript=TGGT1_315320-t26_1 | gene=TGGT1_315320 | organism=Toxoplasma_gondii_GT1 | gene_product=SAG-related sequence SRS52A | transcript_product=SAG-related sequence SRS52A | location=TGGT1_chrXI:4594837-4596241(+) | protein_length=329 | sequence_SO=chromosome | SO=protein_coding	TGGT1_315320-t26_1-p1 [237-258]	0	2334.2	22
FALSE	High	MGVDPELCDFIDR	[K].MGVDPELCDFIDR.[F]					6.47348e-06	0	1	1	2	TGGT1_214790-t26_1-p1	transcript=TGGT1_214790-t26_1 | gene=TGGT1_214790 | organism=Toxoplasma_gondii_GT1 | gene_product=glycoprotein | transcript_product=glycoprotein | location=TGGT1_chrX:6386376-6388397(+) | protein_length=283 | sequence_SO=chromosome | SO=protein_coding	TGGT1_214790-t26_1-p1 [248-260]	0	1509.67	13	0.414	0.864	-1.27	-0.21	0.647619	0.0758649	0.85405	0.330601	21.63	4.65	0.061	5.12	0.414	0.943	0.864	0.828	-4.04	2.36	-1.27	-0.08	-0.21	-0.27	9745.99	2523.7	514532	485233	26.29	157.86	125.94	122.26	10343.9
FALSE	High	LADVLPSATFQETSSAHVFSVK	[K].LADVLPSATFQETSSAHVFSVK.[E]	1xLabel:13C(6)15N(2) [K22]	1xLabel:13C(6)15N(2) [K22]			8.99434e-06	0	1	1	8	TGGT1_315320-t26_1-p1	transcript=TGGT1_315320-t26_1 | gene=TGGT1_315320 | organism=Toxoplasma_gondii_GT1 | gene_product=SAG-related sequence SRS52A | transcript_product=SAG-related sequence SRS52A | location=TGGT1_chrXI:4594837-4596241(+) | protein_length=329 | sequence_SO=chromosome | SO=protein_coding	TGGT1_315320-t26_1-p1 [237-258]	0	2342.21	22	13.507	0.669	3.76	-0.58	0.238488	0.0014952	0.66336	0.193529	63.84	0.83	19.323	13.507	0.709	0.661	0.695	0.669	4.27	3.76	-0.5	-0.6	-0.52	-0.58	4306.89	83220.1	4387218	2.90015e+06	167.55	85.25	56.24	55.35	4306.89
FALSE	High	MGVDPELCDFIDR	[K].MGVDPELCDFIDR.[F]	1xLabel:13C(6)15N(4) [R13]	1xLabel:13C(6)15N(4) [R13]			1.99292e-05	0	1	1	2	TGGT1_214790-t26_1-p1	transcript=TGGT1_214790-t26_1 | gene=TGGT1_214790 | organism=Toxoplasma_gondii_GT1 | gene_product=glycoprotein | transcript_product=glycoprotein | location=TGGT1_chrX:6386376-6388397(+) | protein_length=283 | sequence_SO=chromosome | SO=protein_coding	TGGT1_214790-t26_1-p1 [248-260]	0	1519.68	13
FALSE	High	EPVAASYVEWLQASR	[R].EPVAASYVEWLQASR.[N]	1xLabel:13C(6)15N(4) [R15]	1xLabel:13C(6)15N(4) [R15]			9.63796e-05	0	1	1	4	TGGT1_275650-t26_1-p1	transcript=TGGT1_275650-t26_1 | gene=TGGT1_275650 | organism=Toxoplasma_gondii_GT1 | gene_product=hypothetical protein | transcript_product=hypothetical protein | location=TGGT1_chrIII:288290-290923(+) | protein_length=877 | sequence_SO=chromosome | SO=protein_coding	TGGT1_275650-t26_1-p1 [853-867]	0	1715.86	15
FALSE	High	VGYNPEKVPFVAISGFVGDNMVEK	[K].VGYNPEKVPFVAISGFVGDNMVEK.[S]					1.42486e-06	0	2	4	7	TGGT1_294800B-t26_1-p1; TGGT1_286420A-t26_1-p1	transcript=TGGT1_294800B-t26_1 | gene=TGGT1_294800B | organism=Toxoplasma_gondii_GT1 | gene_product=putative elongation factor 1-alpha (EF-1-ALPHA) | transcript_product=putative elongation factor 1-alpha (EF-1-ALPHA) | location=TGGT1_chrIa:1133102-1134034(-) | protein_length=310 | sequence_SO=chromosome | SO=protein_coding transcript=TGGT1_286420A-t26_1 | gene=TGGT1_286420A | organism=Toxoplasma_…	TGGT1_294800B-t26_1-p1 [41-64]; TGGT1_286420A-t26_1-p1 [179-202]	1	2596.31	24	1.405	0.01	0.49	-6.64	0.402396	0.180992	0.741185	0.500564	63.19	0	2.308	0.806	1.405	0.01	0.809	0.01	1.21	-0.31	0.49	-6.64	-0.31	-6.64	5281.82	6019.31	1.0931e+06	10390	43.09	56.42	27.11	168.32	5281.82
FALSE	High	MGSMGNYVAQPEGGMEIPTQYDYSQLQQQVSR	[R].MGSMGNYVAQPEGGMEIPTQYDYSQLQQQVSR.[E]	1xPhospho [Y/S]	1xPhospho [S3; Y7]	TGGT1_219270-t26_1-p1 1xPhospho [Y/S]	TGGT1_219270-t26_1-p1 1xPhospho [S348; Y352]	1.30598e-05	0	1	1	2	TGGT1_219270-t26_1-p1	transcript=TGGT1_219270-t26_1 | gene=TGGT1_219270 | organism=Toxoplasma_gondii_GT1 | gene_product=multi-pass transmembrane protein | transcript_product=multi-pass transmembrane protein | location=TGGT1_chrXII:948336-949904(+) | protein_length=389 | sequence_SO=chromosome | SO=protein_coding	TGGT1_219270-t26_1-p1 [346-377]	0	3672.58	32	0.321	0.835	-1.64	-0.26	0.130199	0.224167	0.576193	0.529325	6.93	14.03	0.321	0.176	0.753	0.948	0.835	0.572	-1.64	-2.51	-0.41	-0.08	-0.26	-0.81	9169.08	2946.4	6627.86	5534.38	4.27	67.73	169.27	167.28	9169.08
FALSE	High	EQFSDGVGYAWIDHLK	[K].EQFSDGVGYAWIDHLK.[S]					7.17759e-05	0	1	1	4	TGGT1_253430-t26_1-p1	transcript=TGGT1_253430-t26_1 | gene=TGGT1_253430 | organism=Toxoplasma_gondii_GT1 | gene_product=putative asparagine synthetase | transcript_product=putative asparagine synthetase | location=TGGT1_chrIII:924367-930594(+) | protein_length=588 | sequence_SO=chromosome | SO=protein_coding	TGGT1_253430-t26_1-p1 [482-497]	0	1864.89	16	0.136	0.595	-2.88	-0.75	0.00856987	0.196739	0.238541	0.510484	0.85	18.68	0.18	0.136	0.094	0.383	0.961	0.595	-2.48	-2.88	-3.42	-1.38	-0.06	-0.75	10690.2	1922.47	667567	641339	142.14	124.09	92.72	84.21	10690.2
FALSE	High	EQFSDGVGYAWIDHLK	[K].EQFSDGVGYAWIDHLK.[S]	1xLabel:13C(6)15N(2) [K16]	1xLabel:13C(6)15N(2) [K16]			3.99908e-05	0	1	1	2	TGGT1_253430-t26_1-p1	transcript=TGGT1_253430-t26_1 | gene=TGGT1_253430 | organism=Toxoplasma_gondii_GT1 | gene_product=putative asparagine synthetase | transcript_product=putative asparagine synthetase | location=TGGT1_chrIII:924367-930594(+) | protein_length=588 | sequence_SO=chromosome | SO=protein_coding	TGGT1_253430-t26_1-p1 [482-497]	0	1872.9	16
FALSE	High	EQIMSYVDSSVTDKELQAHAIK	[R].EQIMSYVDSSVTDKELQAHAIK.[F]					0.000140798	0	1	1	3	TGGT1_214220-t26_1-p1	transcript=TGGT1_214220-t26_1 | gene=TGGT1_214220 | organism=Toxoplasma_gondii_GT1 | gene_product=hypothetical protein | transcript_product=hypothetical protein | location=TGGT1_chrX:6010193-6012510(+) | protein_length=212 | sequence_SO=chromosome | SO=protein_coding	TGGT1_214220-t26_1-p1 [156-177]	1	2492.23	22
FALSE	High	EQIMSYVDSSVTDK	[R].EQIMSYVDSSVTDK.[E]	1xLabel:13C(6)15N(2) [K14]	1xLabel:13C(6)15N(2) [K14]			0.00021259	0	1	1	1	TGGT1_214220-t26_1-p1	transcript=TGGT1_214220-t26_1 | gene=TGGT1_214220 | organism=Toxoplasma_gondii_GT1 | gene_product=hypothetical protein | transcript_product=hypothetical protein | location=TGGT1_chrX:6010193-6012510(+) | protein_length=212 | sequence_SO=chromosome | SO=protein_coding	TGGT1_214220-t26_1-p1 [156-169]	0	1609.75	14	0.801	4.586	-0.32	2.2	0.271059	0.162233	0.683692	0.482582	3.07	77.62	0.801	0.241	0.827	2.185	4.586	53.19	-0.32	-2.05	-0.27	1.13	2.2	5.73	10631	8197.81	7594.69	34832.5	5.27	51.12	51.78	152.92	10631
FALSE	High	EQLILTQQQNELR	[R].EQLILTQQQNELR.[V]	1xLabel:13C(6)15N(4) [R13]	1xLabel:13C(6)15N(4) [R13]			9.07461e-06	0	1	1	7	TGGT1_216670-t26_1-p1	transcript=TGGT1_216670-t26_1 | gene=TGGT1_216670 | organism=Toxoplasma_gondii_GT1 | gene_product=FUSE-binding protein 2 / KH-type splicing regulatory protein | transcript_product=FUSE-binding protein 2 / KH-type splicing regulatory protein | location=TGGT1_chrXI:5891708-5895741(-) | protein_length=941 | sequence_SO=chromosome | SO=protein_coding	TGGT1_216670-t26_1-p1 [222-234]	0	1622.87	13	0.163	0.883	-2.62	-0.18	0.019935	0.205497	0.28147	0.516181	1.66	10.45	0.095	0.238	0.163	0.883	0.962	0.707	-3.4	-2.07	-2.62	-0.18	-0.06	-0.5	48498.9	6248.79	633321	578747	68.43	75.96	77.42	60.92	66104
FALSE	High	EQLILTQQQNELR	[R].EQLILTQQQNELR.[V]					1.69408e-05	0	1	1	8	TGGT1_216670-t26_1-p1	transcript=TGGT1_216670-t26_1 | gene=TGGT1_216670 | organism=Toxoplasma_gondii_GT1 | gene_product=FUSE-binding protein 2 / KH-type splicing regulatory protein | transcript_product=FUSE-binding protein 2 / KH-type splicing regulatory protein | location=TGGT1_chrXI:5891708-5895741(-) | protein_length=941 | sequence_SO=chromosome | SO=protein_coding	TGGT1_216670-t26_1-p1 [222-234]	0	1612.87	13
FALSE	High	VGVVLSGGQAAGGHNVICGIFDYVK	[R].VGVVLSGGQAAGGHNVICGIFDYVK.[R]	1xLabel:13C(6)15N(2) [K25]	1xLabel:13C(6)15N(2) [K25]			2.88026e-05	0	1	1	2	TGGT1_226960-t26_1-p1	transcript=TGGT1_226960-t26_1 | gene=TGGT1_226960 | organism=Toxoplasma_gondii_GT1 | gene_product=phosphofructokinase PFKII | transcript_product=phosphofructokinase PFKII | location=TGGT1_chrX:1093641-1104060(-) | protein_length=1225 | sequence_SO=chromosome | SO=protein_coding	TGGT1_226960-t26_1-p1 [133-157]	0	2468.28	25
FALSE	High	MGMISQQEVDDIVQR	[K].MGMISQQEVDDIVQR.[T]	1xLabel:13C(6)15N(4) [R15]	1xLabel:13C(6)15N(4) [R15]			6.15534e-06	0	1	1	2	TGGT1_318430-t26_1-p1	transcript=TGGT1_318430-t26_1 | gene=TGGT1_318430 | organism=Toxoplasma_gondii_GT1 | gene_product=malate dehydrogenase MDH | transcript_product=malate dehydrogenase MDH | location=TGGT1_chrIV:1282502-1286316(-) | protein_length=511 | sequence_SO=chromosome | SO=protein_coding	TGGT1_318430-t26_1-p1 [395-409]	0	1758.84	15
FALSE	High	LPACSLGDLVLATVK	[R].LPACSLGDLVLATVK.[K]	1xLabel:13C(6)15N(2) [K15]	1xLabel:13C(6)15N(2) [K15]			1.10656e-05	0	1	1	4	TGGT1_312090-t26_1-p1	transcript=TGGT1_312090-t26_1 | gene=TGGT1_312090 | organism=Toxoplasma_gondii_GT1 | gene_product=ribosomal protein RPL23 | transcript_product=ribosomal protein RPL23 | location=TGGT1_chrXI:2381590-2383685(-) | protein_length=139 | sequence_SO=chromosome | SO=protein_coding	TGGT1_312090-t26_1-p1 [51-65]	0	1507.86	15	0.768	0.701	-0.38	-0.51	0.365652	0.0229543	0.724359	0.213198	27.01	1.91	0.768	1.005	0.085	0.701	0.801	0.683	-0.38	0.01	-3.55	-0.51	-0.32	-0.55	8516.23	6541.8	530586	372150	38.4	94.2	128.11	124.62	8516.23
FALSE	High	LPANPDVFVAGDIAAYPYVK	[R].LPANPDVFVAGDIAAYPYVK.[T]					0.000162421	0	1	1	1	TGGT1_207620-t26_1-p1	transcript=TGGT1_207620-t26_1 | gene=TGGT1_207620 | organism=Toxoplasma_gondii_GT1 | gene_product=pyridine nucleotide-disulfide oxidoreductase domain-containing protein | transcript_product=pyridine nucleotide-disulfide oxidoreductase domain-containing protein | location=TGGT1_chrIb:171089-178693(-) | protein_length=664 | sequence_SO=chromosome | SO=protein_coding	TGGT1_207620-t26_1-p1 [508-527]	0	2120.11	20
FALSE	High	EQLDAEVQNLSAHLR	[K].EQLDAEVQNLSAHLR.[T]					6.30746e-05	0	1	1	3	TGGT1_315110-t26_1-p1	transcript=TGGT1_315110-t26_1 | gene=TGGT1_315110 | organism=Toxoplasma_gondii_GT1 | gene_product=prefoldin, alpha subunit protein | transcript_product=prefoldin, alpha subunit protein | location=TGGT1_chrXI:4425976-4428186(-) | protein_length=178 | sequence_SO=chromosome | SO=protein_coding	TGGT1_315110-t26_1-p1 [32-46]	0	1722.88	15
FALSE	High	TEALTTLAHADSAFEDSTLAER	[K].TEALTTLAHADSAFEDSTLAER.[L]					1.72439e-05	0	1	1	1	TGGT1_258070-t26_1-p1	transcript=TGGT1_258070-t26_1 | gene=TGGT1_258070 | organism=Toxoplasma_gondii_GT1 | gene_product=hypothetical protein | transcript_product=hypothetical protein | location=TGGT1_chrVIIb:3570890-3578893(-) | protein_length=678 | sequence_SO=chromosome | SO=protein_coding	TGGT1_258070-t26_1-p1 [348-369]	0	2349.12	22	13.293	18.628	3.73	4.22	0.110763	0.320821	0.54789	0.591944	113.28	138.23	13.293	100	3.136	35.995	18.628	0.386	3.73	6.64	1.65	5.17	4.22	-1.37	10391.7	138138	13381.1	442829	70.78	58.05	167.46	34.39	10391.7
FALSE	High	LPACSLGDLVLATVK	[R].LPACSLGDLVLATVK.[K]					1.23922e-06	0	1	1	2	TGGT1_312090-t26_1-p1	transcript=TGGT1_312090-t26_1 | gene=TGGT1_312090 | organism=Toxoplasma_gondii_GT1 | gene_product=ribosomal protein RPL23 | transcript_product=ribosomal protein RPL23 | location=TGGT1_chrXI:2381590-2383685(-) | protein_length=139 | sequence_SO=chromosome | SO=protein_coding	TGGT1_312090-t26_1-p1 [51-65]	0	1499.85	15
FALSE	High	LADIGEGIAQVELLK	[K].LADIGEGIAQVELLK.[W]					3.13904e-06	0	1	1	4	TGGT1_319920-t26_1-p1	transcript=TGGT1_319920-t26_1 | gene=TGGT1_319920 | organism=Toxoplasma_gondii_GT1 | gene_product=2-oxo acid dehydrogenases acyltransferase (catalytic domain) domain-containing protein | transcript_product=2-oxo acid dehydrogenases acyltransferase (catalytic domain) domain-containing protein | location=TGGT1_chrIV:604302-610675(-) | protein_length=669 | sequence_SO=chromosome | SO=protein_coding	TGGT1_319920-t26_1-p1 [76-90]	0	1568.89	15
FALSE	High	EQKPVVSFIAGLTAPPGR	[K].EQKPVVSFIAGLTAPPGR.[R]					2.06477e-05	0	1	1	4	TGGT1_290600-t26_1-p1	transcript=TGGT1_290600-t26_1 | gene=TGGT1_290600 | organism=Toxoplasma_gondii_GT1 | gene_product=succinyl-CoA-synthetase alpha SCSA | transcript_product=succinyl-CoA-synthetase alpha SCSA | location=TGGT1_chrIX:3568986-3572521(+) | protein_length=333 | sequence_SO=chromosome | SO=protein_coding	TGGT1_290600-t26_1-p1 [265-282]	0	1867.04	18	1.315	0.683	0.4	-0.55	0.360235	0.185379	0.722652	0.50232	48.47	2.52	0.885	1.315	2.49	0.683	1.001	0.658	-0.18	0.4	1.32	-0.55	0	-0.6	4033.89	3570.42	474322	474786	62.95	54.16	92.1	77.96	4033.89
FALSE	High	LADIGEGIAQVELLK	[K].LADIGEGIAQVELLK.[W]	1xLabel:13C(6)15N(2) [K15]	1xLabel:13C(6)15N(2) [K15]			1.32544e-05	0	1	1	4	TGGT1_319920-t26_1-p1	transcript=TGGT1_319920-t26_1 | gene=TGGT1_319920 | organism=Toxoplasma_gondii_GT1 | gene_product=2-oxo acid dehydrogenases acyltransferase (catalytic domain) domain-containing protein | transcript_product=2-oxo acid dehydrogenases acyltransferase (catalytic domain) domain-containing protein | location=TGGT1_chrIV:604302-610675(-) | protein_length=669 | sequence_SO=chromosome | SO=protein_coding	TGGT1_319920-t26_1-p1 [76-90]	0	1576.9	15	0.111	0.813	-3.17	-0.3	0.0455035	0.00805637	0.381291	0.199491	1.07	1.86	0.111	0.252	0.046	0.813	0.828	0.776	-3.17	-1.99	-4.44	-0.3	-0.27	-0.37	83695.5	8856.64	799127	661938	43.46	37.78	78.61	75.2	83695.5
FALSE	High	MGSMGNYVAQPEGGMEIPTQYDYSQLQQQVSR	[R].MGSMGNYVAQPEGGMEIPTQYDYSQLQQQVSR.[E]					8.537e-09	0	1	1	1	TGGT1_219270-t26_1-p1	transcript=TGGT1_219270-t26_1 | gene=TGGT1_219270 | organism=Toxoplasma_gondii_GT1 | gene_product=multi-pass transmembrane protein | transcript_product=multi-pass transmembrane protein | location=TGGT1_chrXII:948336-949904(+) | protein_length=389 | sequence_SO=chromosome | SO=protein_coding	TGGT1_219270-t26_1-p1 [346-377]	0	3592.61	32	0.869	0.886	-0.2	-0.17	0.699447	0.967871	0.877529	0.978411	81.22	43.89	2.079	0.869	0.239	0.552	1.944	0.886	1.06	-0.2	-2.07	-0.86	0.96	-0.17	8937.09	10013.6	8295.02	5710.76	49.71	65.16	171.42	171.36	4817.66
FALSE	High	MGSMGNYVAQPEGGMEIPTQYDYSQLQQQVSR	[R].MGSMGNYVAQPEGGMEIPTQYDYSQLQQQVSR.[E]	1xOxidation [M]	1xOxidation [M1; M4]			4.79091e-05	0	1	1	2	TGGT1_219270-t26_1-p1	transcript=TGGT1_219270-t26_1 | gene=TGGT1_219270 | organism=Toxoplasma_gondii_GT1 | gene_product=multi-pass transmembrane protein | transcript_product=multi-pass transmembrane protein | location=TGGT1_chrXII:948336-949904(+) | protein_length=389 | sequence_SO=chromosome | SO=protein_coding	TGGT1_219270-t26_1-p1 [346-377]	0	3608.61	32	2.55	0.891	1.35	-0.17	0.508091	0.457986	0.791964	0.630037	123.79	5.62	0.421	2.55	6.233	0.848	0.891	100	-1.25	1.35	2.64	-0.24	-0.17	6.64	2623.42	6688.9	9783.5	10272.5	110.46	34.1	60.06	156.76	13523.5
FALSE	High	LADKVDEATLIELLQQTSAASAAK	[R].LADKVDEATLIELLQQTSAASAAK.[N]					2.61135e-06	0	1	1	2	TGGT1_207690-t26_1-p1	transcript=TGGT1_207690-t26_1 | gene=TGGT1_207690 | organism=Toxoplasma_gondii_GT1 | gene_product=programmed cell death 5 protein | transcript_product=programmed cell death 5 protein | location=TGGT1_chrIb:230155-232824(+) | protein_length=122 | sequence_SO=chromosome | SO=protein_coding	TGGT1_207690-t26_1-p1 [81-104]	1	2486.33	24	1.026	0.695	0.04	-0.52	0.707562	0.0124283	0.879609	0.203151	10.23	1.97	1.026	1.097	0.774	0.714	0.695	0.618	0.04	0.13	-0.37	-0.49	-0.52	-0.69	10262.5	10527.7	183242	127395	11.52	27.27	98.88	91.78	10262.5
FALSE	High	RVTCGYPESGPVNLEVDLSK	[K].RVTCGYPESGPVNLEVDLSK.[D]					4.93216e-05	0	1	1	1	TGGT1_308020-t26_1-p1	transcript=TGGT1_308020-t26_1 | gene=TGGT1_308020 | organism=Toxoplasma_gondii_GT1 | gene_product=SAG-related sequence SRS57 | transcript_product=SAG-related sequence SRS57 | location=TGGT1_chrXII:456740-457897(-) | protein_length=385 | sequence_SO=chromosome | SO=protein_coding	TGGT1_308020-t26_1-p1 [209-228]	1	2163.08	20
FALSE	High	VGGEEALSEVQR	[K].VGGEEALSEVQR.[T]					6.07544e-05	0	1	1	5	TGGT1_259550-t26_1-p1	transcript=TGGT1_259550-t26_1 | gene=TGGT1_259550 | organism=Toxoplasma_gondii_GT1 | gene_product=dihydropteroate synthase | transcript_product=dihydropteroate synthase | location=TGGT1_chrVIIb:2750606-2755609(-) | protein_length=748 | sequence_SO=chromosome | SO=protein_coding	TGGT1_259550-t26_1-p1 [414-425]	0	1273.64	12	18.973	1.43	4.25	0.52	0.345773	0.892943	0.718755	0.926562	145.82	145.73	0.312	54.545	18.973	83.869	1.43	0.024	-1.68	5.77	4.25	6.39	0.52	-5.36	3005.45	57022.6	102653	520778	111.48	79.75	150.98	115.81	13519.6
FALSE	High	LADAVQIISYAVDKDLK	[R].LADAVQIISYAVDKDLK.[W]	2xLabel:13C(6)15N(2) [K14; K17]	2xLabel:13C(6)15N(2) [K14; K17]			0.00010079	0	1	1	2	TGGT1_290950-t26_1-p1	transcript=TGGT1_290950-t26_1 | gene=TGGT1_290950 | organism=Toxoplasma_gondii_GT1 | gene_product=putative clathrin heavy chain | transcript_product=putative clathrin heavy chain | location=TGGT1_chrIX:3770246-3782423(-) | protein_length=1731 | sequence_SO=chromosome | SO=protein_coding	TGGT1_290950-t26_1-p1 [169-185]	1	1878.06	17
FALSE	High	ETNGAAHFLEHMTFK	[K].ETNGAAHFLEHMTFK.[G]					8.70941e-05	0	1	1	4	TGGT1_236210-t26_1-p1	transcript=TGGT1_236210-t26_1 | gene=TGGT1_236210 | organism=Toxoplasma_gondii_GT1 | gene_product=putative peptidase M16 family potein | transcript_product=putative peptidase M16 family potein | location=TGGT1_chrX:5216353-5222014(+) | protein_length=509 | sequence_SO=chromosome | SO=protein_coding	TGGT1_236210-t26_1-p1 [107-121]	0	1732.81	15	1.458	0.094	0.54	-3.41	0.883457	0.117662	0.957095	0.419349	101.46	1.17	2.456	1.458	0.37	0.094	0.243	0.01	1.3	0.54	-1.43	-3.41	-2.04	-6.64	9536.89	4229.88	53693.9	11471.5	66.1	78	165.34	78.55	1722.44
FALSE	High	LAALSSSGLPSHQSLADGER	[K].LAALSSSGLPSHQSLADGER.[V]	1xLabel:13C(6)15N(4) [R20]	1xLabel:13C(6)15N(4) [R20]			0.00010079	0	1	1	1	TGGT1_209140-t26_1-p1	transcript=TGGT1_209140-t26_1 | gene=TGGT1_209140 | organism=Toxoplasma_gondii_GT1 | gene_product=anti-silencing protein, ASF1 family protein | transcript_product=anti-silencing protein, ASF1 family protein | location=TGGT1_chrIb:1087305-1090870(-) | protein_length=269 | sequence_SO=chromosome | SO=protein_coding	TGGT1_209140-t26_1-p1 [60-79]	0	2006.02	20
FALSE	High	SLQANEYVLGEQVEK	[K].SLQANEYVLGEQVEK.[T]	1xLabel:13C(6)15N(2) [K15]	1xLabel:13C(6)15N(2) [K15]			2.84613e-06	0	1	1	1	TGGT1_234505-t26_1-p1	transcript=TGGT1_234505-t26_1 | gene=TGGT1_234505 | organism=Toxoplasma_gondii_GT1 | gene_product=putative phenylalanyl-tRNA synthetase alpha chain A | transcript_product=putative phenylalanyl-tRNA synthetase alpha chain A | location=TGGT1_chrX:4319172-4323950(+) | protein_length=525 | sequence_SO=chromosome | SO=protein_coding	TGGT1_234505-t26_1-p1 [54-68]	0	1714.87	15
FALSE	High	SLQEFVAVVNAQK	[K].SLQEFVAVVNAQK.[R]					0.000166268	0	1	1	1	TGGT1_298610-t26_1-p1	transcript=TGGT1_298610-t26_1 | gene=TGGT1_298610 | organism=Toxoplasma_gondii_GT1 | gene_product=GYF domain-containing protein | transcript_product=GYF domain-containing protein | location=TGGT1_chrXI:6511021-6521705(+) | protein_length=2331 | sequence_SO=chromosome | SO=protein_coding	TGGT1_298610-t26_1-p1 [2074-2086]	0	1432.78	13
FALSE	High	MENGDILLLENVR	[K].MENGDILLLENVR.[F]					4.98979e-05	0	1	1	3	TGGT1_222020-t26_1-p1	transcript=TGGT1_222020-t26_1 | gene=TGGT1_222020 | organism=Toxoplasma_gondii_GT1 | gene_product=phosphoglycerate kinase PGKII | transcript_product=phosphoglycerate kinase PGKII | location=TGGT1_chrII:744480-749627(+) | protein_length=593 | sequence_SO=chromosome | SO=protein_coding	TGGT1_222020-t26_1-p1 [298-310]	0	1515.78	13	2.259	53.239	1.18	5.73	0.272731	0.636458	0.685446	0.742375	86.13	79.3	9.227	0.947	2.259	81.715	53.239	0.02	3.21	-0.08	1.18	6.35	5.73	-5.63	2339.37	5929.43	3654.26	172285	76.61	54.45	170.85	78.4	1440.41
FALSE	High	VGDLDLVAELR	[R].VGDLDLVAELR.[F]					0.00014346	0	1	1	3	TGGT1_257990-t26_1-p1	transcript=TGGT1_257990-t26_1 | gene=TGGT1_257990 | organism=Toxoplasma_gondii_GT1 | gene_product=putative heat shock protein 101 | transcript_product=putative heat shock protein 101 | location=TGGT1_chrVIIb:3637480-3646383(+) | protein_length=927 | sequence_SO=chromosome | SO=protein_coding	TGGT1_257990-t26_1-p1 [490-500]	0	1199.66	11	4.87	0.691	2.28	-0.53	0.257173	0.335111	0.676102	0.597302	124.11	6.12	0.793	4.87	16.816	0.75	0.691	0.016	-0.33	2.28	4.07	-0.41	-0.53	-5.96	10213.1	40304.3	361523	246789	107.77	94.86	39.45	81.56	50794.9
FALSE	High	VGDLDLVAELR	[R].VGDLDLVAELR.[F]	1xLabel:13C(6)15N(4) [R11]	1xLabel:13C(6)15N(4) [R11]			0.000179136	0	1	1	2	TGGT1_257990-t26_1-p1	transcript=TGGT1_257990-t26_1 | gene=TGGT1_257990 | organism=Toxoplasma_gondii_GT1 | gene_product=putative heat shock protein 101 | transcript_product=putative heat shock protein 101 | location=TGGT1_chrVIIb:3637480-3646383(+) | protein_length=927 | sequence_SO=chromosome | SO=protein_coding	TGGT1_257990-t26_1-p1 [490-500]	0	1209.67	11
FALSE	High	TEEQAFALGPPRR	[R].TEEQAFALGPPRR.[H]	2xLabel:13C(6)15N(4) [R12; R13]	2xLabel:13C(6)15N(4) [R12; R13]			0.000191281	0	1	1	7	TGGT1_410360-t26_1-p1	transcript=TGGT1_410360-t26_1 | gene=TGGT1_410360 | organism=Toxoplasma_gondii_GT1 | gene_product=putative transmembrane protein | transcript_product=putative transmembrane protein | location=TGGT1_chrII:71310-72374(+) | protein_length=354 | sequence_SO=chromosome | SO=protein_coding	TGGT1_410360-t26_1-p1 [62-74]	1	1491.78	13
FALSE	High	ETAVVAGAAAHPGAEACNAHIQALFPALGAEAK	[K].ETAVVAGAAAHPGAEACNAHIQALFPALGAEAK.[D]	1xLabel:13C(6)15N(2) [K33]	1xLabel:13C(6)15N(2) [K33]			0.000114819	0	1	1	2	TGGT1_226960-t26_1-p1	transcript=TGGT1_226960-t26_1 | gene=TGGT1_226960 | organism=Toxoplasma_gondii_GT1 | gene_product=phosphofructokinase PFKII | transcript_product=phosphofructokinase PFKII | location=TGGT1_chrX:1093641-1104060(-) | protein_length=1225 | sequence_SO=chromosome | SO=protein_coding	TGGT1_226960-t26_1-p1 [624-656]	0	3164.6	33	0.071	0.659	-3.81	-0.6	0.440696	0.0219967	0.759946	0.211157	0.13	5.23	4.315	0.059	0.071	0.659	0.747	0.606	2.11	-4.08	-3.81	-0.6	-0.42	-0.72	161034	9512.51	614691	405296	85.4	25.02	124.34	118.86	1706.6
FALSE	High	ETAVVAGAAAHPGAEACNAHIQALFPALGAEAK	[K].ETAVVAGAAAHPGAEACNAHIQALFPALGAEAK.[D]					1.09389e-06	0	1	1	2	TGGT1_226960-t26_1-p1	transcript=TGGT1_226960-t26_1 | gene=TGGT1_226960 | organism=Toxoplasma_gondii_GT1 | gene_product=phosphofructokinase PFKII | transcript_product=phosphofructokinase PFKII | location=TGGT1_chrX:1093641-1104060(-) | protein_length=1225 | sequence_SO=chromosome | SO=protein_coding	TGGT1_226960-t26_1-p1 [624-656]	0	3156.59	33
FALSE	High	LAASTGDPFASLLK	[R].LAASTGDPFASLLK.[A]					0.000137805	0	1	1	5	TGGT1_217460-t26_1-p1	transcript=TGGT1_217460-t26_1 | gene=TGGT1_217460 | organism=Toxoplasma_gondii_GT1 | gene_product=glutaminyl-tRNA synthetase (GlnRS) | transcript_product=glutaminyl-tRNA synthetase (GlnRS) | location=TGGT1_chrXII:1787579-1795013(-) | protein_length=860 | sequence_SO=chromosome | SO=protein_coding	TGGT1_217460-t26_1-p1 [90-103]	0	1390.76	14	0.682	0.753	-0.55	-0.41	0.979722	0.00566223	0.991882	0.197599	1.84	1.13	0.682	2.136	0.664	0.753	0.742	0.794	-0.55	1.1	-0.59	-0.41	-0.43	-0.33	8495.36	9310.78	955340	718984	156.31	145.67	96.26	99.08	184483
FALSE	High	LAASTGDPFASLLK	[R].LAASTGDPFASLLK.[A]	1xLabel:13C(6)15N(2) [K14]	1xLabel:13C(6)15N(2) [K14]			0.000123306	0	1	1	3	TGGT1_217460-t26_1-p1	transcript=TGGT1_217460-t26_1 | gene=TGGT1_217460 | organism=Toxoplasma_gondii_GT1 | gene_product=glutaminyl-tRNA synthetase (GlnRS) | transcript_product=glutaminyl-tRNA synthetase (GlnRS) | location=TGGT1_chrXII:1787579-1795013(-) | protein_length=860 | sequence_SO=chromosome | SO=protein_coding	TGGT1_217460-t26_1-p1 [90-103]	0	1398.77	14
FALSE	High	SAAGTAAGSFEASSLEK	[R].SAAGTAAGSFEASSLEK.[N]					3.65262e-05	0	1	1	2	TGGT1_207770-t26_1-p1	transcript=TGGT1_207770-t26_1 | gene=TGGT1_207770 | organism=Toxoplasma_gondii_GT1 | gene_product=PCI domain-containing protein | transcript_product=PCI domain-containing protein | location=TGGT1_chrIb:293641-299816(-) | protein_length=511 | sequence_SO=chromosome | SO=protein_coding	TGGT1_207770-t26_1-p1 [383-399]	0	1583.75	17
FALSE	High	LAATYNGFLWASSHLGEIK	[R].LAATYNGFLWASSHLGEIK.[Q]					1.46564e-05	0	1	1	2	TGGT1_232280-t26_1-p1	transcript=TGGT1_232280-t26_1 | gene=TGGT1_232280 | organism=Toxoplasma_gondii_GT1 | gene_product=hypothetical protein | transcript_product=hypothetical protein | location=TGGT1_chrVIII:1988375-1990326(+) | protein_length=275 | sequence_SO=chromosome | SO=protein_coding	TGGT1_232280-t26_1-p1 [122-140]	0	2078.07	19	0.356	0.018	-1.49	-5.78	0.161562	0.0149124	0.607597	0.20435	12.92	0.02	0.112	0.722	0.356	0.018	0.047	0.01	-3.16	-0.47	-1.49	-5.78	-4.41	-6.64	4695.45	1646.59	288429	12017.8	65.53	48.87	99.1	40.17	13160.6
FALSE	High	IAAVTETIGIAVAGLAADGR	[R].IAAVTETIGIAVAGLAADGR.[Q]					0.000104217	0	1	1	2	TGGT1_216450-t26_1-p1	transcript=TGGT1_216450-t26_1 | gene=TGGT1_216450 | organism=Toxoplasma_gondii_GT1 | gene_product=peptidase, T1 family protein | transcript_product=peptidase, T1 family protein | location=TGGT1_chrXI:6058951-6061605(+) | protein_length=260 | sequence_SO=chromosome | SO=protein_coding	TGGT1_216450-t26_1-p1 [67-86]	0	1869.04	20
FALSE	High	VGDDIEVRPGIISK	[K].VGDDIEVRPGIISK.[D]					0.000216198	0	1	1	6	TGGT1_235970-t26_1-p1	transcript=TGGT1_235970-t26_1 | gene=TGGT1_235970 | organism=Toxoplasma_gondii_GT1 | gene_product=putative eukaryotic initiation factor-2 gamma | transcript_product=putative eukaryotic initiation factor-2 gamma | location=TGGT1_chrX:5097473-5103737(+) | protein_length=465 | sequence_SO=chromosome | SO=protein_coding	TGGT1_235970-t26_1-p1 [284-297]	0	1497.83	14	13.172	74.763	3.72	6.22	0.0713465	0.490328	0.458699	0.646171	60.6	50.05	13.172	7.788	100	74.763	100	0.048	3.72	2.96	6.64	6.22	6.64	-4.38	5931.17	78126.4	6684.17	499730	78.43	24.72	172.11	77.39	5931.17
FALSE	High	MENENGTVGSPTASVAALSK	[-].MENENGTVGSPTASVAALSK.[G]	1xAcetyl [N-Term]	1xAcetyl [N-Term]	TGGT1_268200-t26_1-p1 1xAcetyl [N-Term]	TGGT1_268200-t26_1-p1 1xAcetyl [N-Term]	9.85622e-05	0	1	1	1	TGGT1_268200-t26_1-p1	transcript=TGGT1_268200-t26_1 | gene=TGGT1_268200 | organism=Toxoplasma_gondii_GT1 | gene_product=RNA recognition motif-containing protein | transcript_product=RNA recognition motif-containing protein | location=TGGT1_chrVIII:6648500-6651532(+) | protein_length=648 | sequence_SO=chromosome | SO=protein_coding	TGGT1_268200-t26_1-p1 [1-20]	0	2004.95	20	27.76	1.482	4.79	0.57	0.1695	0.384856	0.615285	0.606822	43.21	62.06	27.76	35.851	1.134	0.862	1.482	27.033	4.79	5.16	0.18	-0.21	0.57	4.76	8242.73	107716	8841.65	13102.2	47.58	97.48	24.67	143.06	8696.46
FALSE	High	VFYSLPDGKDPFPVDPDVEDVFDMK	[R].VFYSLPDGKDPFPVDPDVEDVFDMK.[L]					4.84693e-05	0	1	1	1	TGGT1_209260-t26_1-p1	transcript=TGGT1_209260-t26_1 | gene=TGGT1_209260 | organism=Toxoplasma_gondii_GT1 | gene_product=putative cytochrome c oxidase subunit | transcript_product=putative cytochrome c oxidase subunit | location=TGGT1_chrIb:1169758-1172481(-) | protein_length=310 | sequence_SO=chromosome | SO=protein_coding	TGGT1_209260-t26_1-p1 [235-259]	1	2871.34	25
FALSE	High	VFVTAELPFSK	[K].VFVTAELPFSK.[R]	1xLabel:13C(6)15N(2) [K11]	1xLabel:13C(6)15N(2) [K11]			0.000184671	0	1	1	10	TGGT1_239760-t26_1-p1	transcript=TGGT1_239760-t26_1 | gene=TGGT1_239760 | organism=Toxoplasma_gondii_GT1 | gene_product=ribosomal protein RPL22 | transcript_product=ribosomal protein RPL22 | location=TGGT1_chrVI:893982-895795(-) | protein_length=133 | sequence_SO=chromosome | SO=protein_coding	TGGT1_239760-t26_1-p1 [78-88]	0	1245.7	11
FALSE	High	LAALFTQHQTQEETPQK	[R].LAALFTQHQTQEETPQK.[G]	1xLabel:13C(6)15N(2) [K17]	1xLabel:13C(6)15N(2) [K17]			6.14595e-05	0	1	1	4	TGGT1_321400-t26_1-p1	transcript=TGGT1_321400-t26_1 | gene=TGGT1_321400 | organism=Toxoplasma_gondii_GT1 | gene_product=microsomal signal peptidase (spc12) domain-containing protein | transcript_product=microsomal signal peptidase (spc12) domain-containing protein | location=TGGT1_chrIb:1847078-1847464(+) | protein_length=128 | sequence_SO=chromosome | SO=protein_coding	TGGT1_321400-t26_1-p1 [95-111]	0	1978.01	17
FALSE	High	SAATIEEFKPGDGDGAYLLESPEDHVSLVSQYAHK	[R].SAATIEEFKPGDGDGAYLLESPEDHVSLVSQYAHK.[K]	2xLabel:13C(6)15N(2) [K9; K35]	2xLabel:13C(6)15N(2) [K9; K35]			0.000129149	0	1	1	1	TGGT1_232280-t26_1-p1	transcript=TGGT1_232280-t26_1 | gene=TGGT1_232280 | organism=Toxoplasma_gondii_GT1 | gene_product=hypothetical protein | transcript_product=hypothetical protein | location=TGGT1_chrVIII:1988375-1990326(+) | protein_length=275 | sequence_SO=chromosome | SO=protein_coding	TGGT1_232280-t26_1-p1 [27-61]	0	3776.83	35
FALSE	High	LAALLDGGEASVEK	[R].LAALLDGGEASVEK.[F]					2.69004e-06	0	1	1	18	TGGT1_270510-t26_1-p1	transcript=TGGT1_270510-t26_1 | gene=TGGT1_270510 | organism=Toxoplasma_gondii_GT1 | gene_product=asparaginyl-tRNA synthetase (NOB+tRNA synthase) | transcript_product=asparaginyl-tRNA synthetase (NOB+tRNA synthase) | location=TGGT1_chrVIII:5218409-5221722(+) | protein_length=676 | sequence_SO=chromosome | SO=protein_coding	TGGT1_270510-t26_1-p1 [173-186]	0	1372.73	14	0.721	0.735	-0.47	-0.44	0.00730492	0.00400572	0.232219	0.197599	0.93	2.16	0.712	0.775	0.721	0.755	0.735	0.705	-0.49	-0.37	-0.47	-0.41	-0.44	-0.5	300571	214009	3.42252e+06	2.5829e+06	49.93	47.84	74.49	71.14	300571
FALSE	High	ETVNTPEAPQATAAPAAATASPAR	[K].ETVNTPEAPQATAAPAAATASPAR.[S]					2.31649e-05	0	1	1	2	TGGT1_230940-t26_1-p1	transcript=TGGT1_230940-t26_1 | gene=TGGT1_230940 | organism=Toxoplasma_gondii_GT1 | gene_product=hypothetical protein | transcript_product=hypothetical protein | location=TGGT1_chrVIII:1112065-1119747(+) | protein_length=1523 | sequence_SO=chromosome | SO=protein_coding	TGGT1_230940-t26_1-p1 [309-332]	0	2293.14	24	2.468	0.643	1.3	-0.64	0.169166	0.3501	0.615285	0.600448	20.49	47.32	2.81	2.468	1.04	1.139	0.134	0.643	1.49	1.3	0.06	0.19	-2.9	-0.64	4145.23	11646.6	9617.28	4689.27	69.76	17.72	164.98	167.58	4145.23
FALSE	High	LAALLDGGEASVEK	[R].LAALLDGGEASVEK.[F]	1xLabel:13C(6)15N(2) [K14]	1xLabel:13C(6)15N(2) [K14]			8.68029e-06	0	1	1	15	TGGT1_270510-t26_1-p1	transcript=TGGT1_270510-t26_1 | gene=TGGT1_270510 | organism=Toxoplasma_gondii_GT1 | gene_product=asparaginyl-tRNA synthetase (NOB+tRNA synthase) | transcript_product=asparaginyl-tRNA synthetase (NOB+tRNA synthase) | location=TGGT1_chrVIII:5218409-5221722(+) | protein_length=676 | sequence_SO=chromosome | SO=protein_coding	TGGT1_270510-t26_1-p1 [173-186]	0	1380.75	14
FALSE	High	ETVGAYSYEELER	[R].ETVGAYSYEELER.[Q]					9.91149e-05	0	1	1	3	TGGT1_223920-t26_1-p1	transcript=TGGT1_223920-t26_1 | gene=TGGT1_223920 | organism=Toxoplasma_gondii_GT1 | gene_product=rhoptry neck protein RON3 | transcript_product=rhoptry neck protein RON3 | location=TGGT1_chrX:3357300-3367973(+) | protein_length=1958 | sequence_SO=chromosome | SO=protein_coding	TGGT1_223920-t26_1-p1 [1121-1133]	0	1545.71	13	0.442	0.818	-1.18	-0.29	0.183813	0.398335	0.62173	0.610711	1.49	13.35	0.442	1	0.419	0.818	0.928	0.01	-1.18	0	-1.25	-0.29	-0.11	-6.64	12794.2	12489.1	284554	224050	51.67	41.02	79.76	86.63	28764.3
FALSE	High	SAATIEEFKPGDGDGAYLLESPEDHVSLVSQYAHK	[R].SAATIEEFKPGDGDGAYLLESPEDHVSLVSQYAHK.[K]					6.97491e-05	0	1	1	3	TGGT1_232280-t26_1-p1	transcript=TGGT1_232280-t26_1 | gene=TGGT1_232280 | organism=Toxoplasma_gondii_GT1 | gene_product=hypothetical protein | transcript_product=hypothetical protein | location=TGGT1_chrVIII:1988375-1990326(+) | protein_length=275 | sequence_SO=chromosome | SO=protein_coding	TGGT1_232280-t26_1-p1 [27-61]	0	3760.8	35	0.209	0.369	-2.26	-1.44	0.166641	0.040775	0.614903	0.247777	3.94	0.1	0.209	0.082	0.816	0.369	0.368	0.618	-2.26	-3.62	-0.29	-1.44	-1.44	-0.7	53213.6	5763.52	1.73476e+06	637640	71.55	47.06	47.65	67.94	53213.6
FALSE	High	ETAAESNTAVVIDPNAPAWSIIAVK	[K].ETAAESNTAVVIDPNAPAWSIIAVK.[A]					9.96703e-05	0	1	1	1	TGGT1_203450-t26_1-p1	transcript=TGGT1_203450-t26_1 | gene=TGGT1_203450 | organism=Toxoplasma_gondii_GT1 | gene_product=DUF3228 domain-containing protein | transcript_product=DUF3228 domain-containing protein | location=TGGT1_chrVIIa:2394615-2400109(-) | protein_length=465 | sequence_SO=chromosome | SO=protein_coding	TGGT1_203450-t26_1-p1 [385-409]	0	2567.34	25
FALSE	High	ETTQVQLMGFSR	[R].ETTQVQLMGFSR.[A]					0.0001667	0	1	1	2	TGGT1_319920-t26_1-p1	transcript=TGGT1_319920-t26_1 | gene=TGGT1_319920 | organism=Toxoplasma_gondii_GT1 | gene_product=2-oxo acid dehydrogenases acyltransferase (catalytic domain) domain-containing protein | transcript_product=2-oxo acid dehydrogenases acyltransferase (catalytic domain) domain-containing protein | location=TGGT1_chrIV:604302-610675(-) | protein_length=669 | sequence_SO=chromosome | SO=protein_coding	TGGT1_319920-t26_1-p1 [428-439]	0	1396.69	12
FALSE	High	ETTPVHGLQAPSSAAAIAPVLAWMDEEDR	[R].ETTPVHGLQAPSSAAAIAPVLAWMDEEDR.[K]					0.000170185	0	1	1	1	TGGT1_249180-t26_1-p1	transcript=TGGT1_249180-t26_1 | gene=TGGT1_249180 | organism=Toxoplasma_gondii_GT1 | gene_product=bifunctional dihydrofolate reductase-thymidylate synthase | transcript_product=bifunctional dihydrofolate reductase-thymidylate synthase | location=TGGT1_chrXII:4294324-4300363(-) | protein_length=610 | sequence_SO=chromosome | SO=protein_coding	TGGT1_249180-t26_1-p1 [274-302]	0	3062.49	29	0.208	0.415	-2.26	-1.27	0.0395522	0.688461	0.36223	0.778704	3.15	24.88	0.31	0.208	0.095	18.969	0.415	0.01	-1.69	-2.26	-3.4	4.25	-1.27	-6.64	9069.73	1007.73	6885.63	2855.15	33.25	68.04	168.86	97.79	9069.73
FALSE	High	SAALIHQSTLVR	[R].SAALIHQSTLVR.[R]					0.000137435	0	1	1	16	TGGT1_284560-t26_1-p1	transcript=TGGT1_284560-t26_1 | gene=TGGT1_284560 | organism=Toxoplasma_gondii_GT1 | gene_product=ribosomal protein RPL9 | transcript_product=ribosomal protein RPL9 | location=TGGT1_chrV:2561959-2564374(+) | protein_length=190 | sequence_SO=chromosome | SO=protein_coding	TGGT1_284560-t26_1-p1 [156-167]	0	1295.74	12	0.934	0.886	-0.1	-0.17	0.258782	0.359373	0.676876	0.601934	10.07	3.12	0.861	0.934	1.007	0.886	0.91	0.15	-0.22	-0.1	0.01	-0.17	-0.14	-2.74	253685	236917	3.72846e+06	1.88711e+06	66.37	60.58	43.84	63.77	433102
FALSE	High	MELPLDAWATAAHGSK	[-].MELPLDAWATAAHGSK.[A]	1xAcetyl [N-Term]	1xAcetyl [N-Term]	TGGT1_286590-t26_1-p1 1xAcetyl [N-Term]	TGGT1_286590-t26_1-p1 1xAcetyl [N-Term]	0.000104798	0	1	1	1	TGGT1_286590-t26_1-p1	transcript=TGGT1_286590-t26_1 | gene=TGGT1_286590 | organism=Toxoplasma_gondii_GT1 | gene_product=microtubule associated protein SPM2 | transcript_product=microtubule associated protein SPM2 | location=TGGT1_chrV:1625039-1626577(+) | protein_length=357 | sequence_SO=chromosome | SO=protein_coding	TGGT1_286590-t26_1-p1 [1-16]	0	1739.84	16	2.172	1.016	1.12	0.02	0.618086	0.633344	0.841208	0.739298	10.32	37.14	0.485	2.172	2.323	1.016	2.191	0.761	-1.04	1.12	1.22	0.02	1.13	-0.39	4678.22	10867.6	3651.72	6586.39	19.52	67.34	170.93	168.63	4547.66
FALSE	High	VFVQESVHDAFLEHLK	[R].VFVQESVHDAFLEHLK.[N]					0.000168	0	1	1	2	TGGT1_222160-t26_1-p1	transcript=TGGT1_222160-t26_1 | gene=TGGT1_222160 | organism=Toxoplasma_gondii_GT1 | gene_product=aldehyde dehydrogenase | transcript_product=aldehyde dehydrogenase | location=TGGT1_chrII:900932-907660(-) | protein_length=497 | sequence_SO=chromosome | SO=protein_coding	TGGT1_222160-t26_1-p1 [297-312]	0	1897.98	16	0.858	0.347	-0.22	-1.53	0.3437	0.641629	0.717222	0.745607	5.23	17.35	0.858	0.161	0.899	15.355	0.347	0.01	-0.22	-2.63	-0.15	3.94	-1.53	-6.64	7335.07	5126.48	22127.9	7682.03	108.52	38.02	167.32	38.73	3393.09
FALSE	High	ETSDVIELTDGNFNQLVMK	[K].ETSDVIELTDGNFNQLVMK.[D]	1xLabel:13C(6)15N(2) [K19]	1xLabel:13C(6)15N(2) [K19]			0.000175964	0	1	1	1	TGGT1_249270-t26_1-p1	transcript=TGGT1_249270-t26_1 | gene=TGGT1_249270 | organism=Toxoplasma_gondii_GT1 | gene_product=putative protein disulfide isomerase-related protein (provisional) | transcript_product=putative protein disulfide isomerase-related protein (provisional) | location=TGGT1_chrXII:4348987-4354246(+) | protein_length=547 | sequence_SO=chromosome | SO=protein_coding	TGGT1_249270-t26_1-p1 [286-304]	0	2161.06	19
FALSE	High	ETSDVIELTDGNFNQLVMK	[K].ETSDVIELTDGNFNQLVMK.[D]					9.29266e-05	0	1	1	1	TGGT1_249270-t26_1-p1	transcript=TGGT1_249270-t26_1 | gene=TGGT1_249270 | organism=Toxoplasma_gondii_GT1 | gene_product=putative protein disulfide isomerase-related protein (provisional) | transcript_product=putative protein disulfide isomerase-related protein (provisional) | location=TGGT1_chrXII:4348987-4354246(+) | protein_length=547 | sequence_SO=chromosome | SO=protein_coding	TGGT1_249270-t26_1-p1 [286-304]	0	2153.04	19	1.336	1.134	0.42	0.18	0.266382	0.483675	0.681573	0.642607	38.09	53.91	1.336	1.679	0.951	1.134	1.546	0.01	0.42	0.75	-0.07	0.18	0.63	-6.64	6923.69	6581.19	7988.76	5720.99	52.93	65.37	170.98	58.69	2116.28
FALSE	High	ETQNLASEPPPGITAQPEPNNYR	[K].ETQNLASEPPPGITAQPEPNNYR.[H]					1.22007e-05	0	1	1	3	TGGT1_304770-t26_1-p1	transcript=TGGT1_304770-t26_1 | gene=TGGT1_304770 | organism=Toxoplasma_gondii_GT1 | gene_product=ubiquitin-conjugating enzyme subfamily protein | transcript_product=ubiquitin-conjugating enzyme subfamily protein | location=TGGT1_chrVIIa:677672-680044(-) | protein_length=155 | sequence_SO=chromosome | SO=protein_coding	TGGT1_304770-t26_1-p1 [10-32]	0	2523.21	23	12.935	18.961	3.69	4.24	0.0386317	0.222674	0.360161	0.527703	27.09	136.41	3.725	15.299	12.935	36.407	18.961	0.762	1.9	3.94	3.69	5.19	4.24	-0.39	3242.57	22403.8	8860.79	212738	66.06	108.91	168.64	75.26	3242.57
FALSE	High	ETTPVHGLQAPSSAAAIAPVLAWMDEEDR	[R].ETTPVHGLQAPSSAAAIAPVLAWMDEEDR.[K]	1xLabel:13C(6)15N(4) [R29]	1xLabel:13C(6)15N(4) [R29]			0.000170624	0	1	1	1	TGGT1_249180-t26_1-p1	transcript=TGGT1_249180-t26_1 | gene=TGGT1_249180 | organism=Toxoplasma_gondii_GT1 | gene_product=bifunctional dihydrofolate reductase-thymidylate synthase | transcript_product=bifunctional dihydrofolate reductase-thymidylate synthase | location=TGGT1_chrXII:4294324-4300363(-) | protein_length=610 | sequence_SO=chromosome | SO=protein_coding	TGGT1_249180-t26_1-p1 [274-302]	0	3072.5	29
FALSE	High	VFTMGAENSR	[K].VFTMGAENSR.[S]	1xOxidation [M4]; 1xLabel:13C(6)15N(4) [R10]	1xOxidation [M4]; 1xLabel:13C(6)15N(4) [R10]			0.000214132	0	2	2	23	TGGT1_308090-t26_1-p1; TGGT1_411430-t26_1-p1	transcript=TGGT1_308090-t26_1 | gene=TGGT1_308090 | organism=Toxoplasma_gondii_GT1 | gene_product=rhoptry protein ROP5 | transcript_product=rhoptry protein ROP5 | location=AAQM03000031:206-1855(-) | protein_length=549 | sequence_SO=contig | SO=protein_coding transcript=TGGT1_411430-t26_1 | gene=TGGT1_411430 | organism=Toxoplasma_gondii_GT1 | gene_product=rhoptry protein ROP5 | transcript_product=…	TGGT1_308090-t26_1-p1 [264-273]; TGGT1_411430-t26_1-p1 [193-202]	0	1137.52	10	0.239	0.623	-2.06	-0.68	0.0544931	0.0166533	0.412856	0.20435	0.22	6.02	0.551	0.233	0.239	0.688	0.623	0.554	-0.86	-2.1	-2.06	-0.54	-0.68	-0.85	1.12834e+06	262980	3.88749e+06	2.67413e+06	40.27	89.4	57.93	47.78	1.61262e+06
FALSE	High	IAAVVSGESPVVISK	[K].IAAVVSGESPVVISK.[F]					0.000146554	0	1	1	2	TGGT1_215260-t26_1-p1	transcript=TGGT1_215260-t26_1 | gene=TGGT1_215260 | organism=Toxoplasma_gondii_GT1 | gene_product=carbamoylphosphate synthetase | transcript_product=carbamoylphosphate synthetase | location=TGGT1_chrX:6736108-6760149(-) | protein_length=1699 | sequence_SO=chromosome | SO=protein_coding	TGGT1_215260-t26_1-p1 [1307-1321]	0	1455.84	15
FALSE	High	VGEAVDIVGQVGR	[R].VGEAVDIVGQVGR.[Q]					7.03514e-05	0	1	1	6	TGGT1_313410-t26_1-p1	transcript=TGGT1_313410-t26_1 | gene=TGGT1_313410 | organism=Toxoplasma_gondii_GT1 | gene_product=proteasome 26S regulatory subunit | transcript_product=proteasome 26S regulatory subunit | location=TGGT1_chrXI:3312986-3323185(+) | protein_length=1091 | sequence_SO=chromosome | SO=protein_coding	TGGT1_313410-t26_1-p1 [1024-1036]	0	1298.71	13	0.336	0.449	-1.57	-1.15	0.593684	0.024133	0.830799	0.215174	15.39	1.18	0.028	0.336	5.8	0.615	0.432	0.449	-5.16	-1.57	2.54	-0.7	-1.21	-1.15	28449.3	9573.03	358580	220628	78.44	98.84	96.12	87.62	43455
FALSE	High	MFALQDAEQLQLQR	[-].MFALQDAEQLQLQR.[M]	1xAcetyl [N-Term]; 1xLabel:13C(6)15N(4) [R14]	1xAcetyl [N-Term]; 1xLabel:13C(6)15N(4) [R14]	TGGT1_288245-t26_1-p1 1xAcetyl [N-Term]	TGGT1_288245-t26_1-p1 1xAcetyl [N-Term]	2.97488e-05	0	1	1	1	TGGT1_288245-t26_1-p1	transcript=TGGT1_288245-t26_1 | gene=TGGT1_288245 | organism=Toxoplasma_gondii_GT1 | gene_product=hypothetical protein | transcript_product=hypothetical protein | location=TGGT1_chrIX:2221352-2221510(-) | protein_length=52 | sequence_SO=chromosome | SO=protein_coding	TGGT1_288245-t26_1-p1 [1-14]	0	1742.88	14	1.106	0.26	0.15	-1.94	0.846819	0.331403	0.942908	0.595765	127.38	9.46	1.106	3.235	0.156	1.517	0.26	0.015	0.15	1.69	-2.68	0.6	-1.94	-6.05	3400.47	2803.62	10881.3	7791.97	69.51	102.6	168.02	60.33	2534.16
FALSE	High	LADASSEDLPGVR	[R].LADASSEDLPGVR.[T]	1xLabel:13C(6)15N(4) [R13]	1xLabel:13C(6)15N(4) [R13]			0.000135962	0	1	1	2	TGGT1_232260-t26_1-p1	transcript=TGGT1_232260-t26_1 | gene=TGGT1_232260 | organism=Toxoplasma_gondii_GT1 | gene_product=hypothetical protein | transcript_product=hypothetical protein | location=TGGT1_chrVIII:1978812-1980484(-) | protein_length=306 | sequence_SO=chromosome | SO=protein_coding	TGGT1_232260-t26_1-p1 [133-145]	0	1339.67	13
FALSE	High	VGFETIHENSIKPVAPLSENSK	[R].VGFETIHENSIKPVAPLSENSK.[G]					0.000146165	0	1	1	2	TGGT1_231410-t26_1-p1	transcript=TGGT1_231410-t26_1 | gene=TGGT1_231410 | organism=Toxoplasma_gondii_GT1 | gene_product=hypothetical protein | transcript_product=hypothetical protein | location=TGGT1_chrVIII:1401693-1406022(+) | protein_length=571 | sequence_SO=chromosome | SO=protein_coding	TGGT1_231410-t26_1-p1 [520-541]	0	2396.25	22	6.368	0.701	2.67	-0.51	0.571687	0.0439094	0.819742	0.255622	144.23	5.92	0.173	6.368	13.595	0.701	0.758	0.567	-2.53	2.67	3.76	-0.51	-0.4	-0.82	6812.53	43384.3	398327	301800	45.1	83.86	92.42	77.81	10477.6
FALSE	High	ESLDAELDKYMGDDNIKK	[K].ESLDAELDKYMGDDNIKK.[R]					0.000180967	0	1	1	4	TGGT1_297430-t26_1-p1	transcript=TGGT1_297430-t26_1 | gene=TGGT1_297430 | organism=Toxoplasma_gondii_GT1 | gene_product=hypothetical protein | transcript_product=hypothetical protein | location=TGGT1_chrII:1749482-1752364(+) | protein_length=248 | sequence_SO=chromosome | SO=protein_coding	TGGT1_297430-t26_1-p1 [160-177]	2	2083.99	18	0.023	0.03	-5.42	-5.06	0.0212233	0.132952	0.287143	0.445046	0	0.06	0.1	0.023	0.023	0.03	0.016	0.582	-3.32	-5.42	-5.42	-5.06	-5.96	-0.78	291418	11942.2	400065	6421.31	62.17	30.62	84.74	168.36	127453
FALSE	High	LADAVGVTLGPK	[R].LADAVGVTLGPK.[G]					6.25318e-05	0	1	1	12	TGGT1_247550-t26_1-p1	transcript=TGGT1_247550-t26_1 | gene=TGGT1_247550 | organism=Toxoplasma_gondii_GT1 | gene_product=heat shock protein HSP60 | transcript_product=heat shock protein HSP60 | location=TGGT1_chrXII:3342084-3346052(-) | protein_length=575 | sequence_SO=chromosome | SO=protein_coding	TGGT1_247550-t26_1-p1 [45-56]	0	1140.66	12	0.779	0.809	-0.36	-0.31	0.536213	0.0260516	0.804102	0.220629	0.74	3.26	0.773	0.779	14.538	0.836	0.809	0.736	-0.37	-0.36	3.86	-0.26	-0.31	-0.44	104801	115565	1.53176e+06	1.23904e+06	80.89	27.79	72.24	65.29	149546
FALSE	High	ESGVVLVDLPAQTTDK	[R].ESGVVLVDLPAQTTDK.[Q]	1xLabel:13C(6)15N(2) [K16]	1xLabel:13C(6)15N(2) [K16]			9.18274e-06	0	1	1	7	TGGT1_204050-t26_1-p1	transcript=TGGT1_204050-t26_1 | gene=TGGT1_204050 | organism=Toxoplasma_gondii_GT1 | gene_product=subtilisin SUB1 | transcript_product=subtilisin SUB1 | location=TGGT1_chrVIIa:1932241-1938144(+) | protein_length=795 | sequence_SO=chromosome | SO=protein_coding	TGGT1_204050-t26_1-p1 [171-186]	0	1679.89	16	1.074	0.979	0.1	-0.03	0.435585	0.435879	0.758594	0.622937	23.7	6.32	0.902	1.074	5.07	0.85	1.022	0.979	-0.15	0.1	2.34	-0.23	0.03	-0.03	53113.3	75290	841586	860499	53.67	43.04	84.88	87.38	83453.1
FALSE	High	ESGVVLVDLPAQTTDK	[R].ESGVVLVDLPAQTTDK.[Q]					7.05533e-05	0	1	1	8	TGGT1_204050-t26_1-p1	transcript=TGGT1_204050-t26_1 | gene=TGGT1_204050 | organism=Toxoplasma_gondii_GT1 | gene_product=subtilisin SUB1 | transcript_product=subtilisin SUB1 | location=TGGT1_chrVIIa:1932241-1938144(+) | protein_length=795 | sequence_SO=chromosome | SO=protein_coding	TGGT1_204050-t26_1-p1 [171-186]	0	1671.88	16
FALSE	High	ESGSAASPEKPANPEPAVPAAPVEK	[R].ESGSAASPEKPANPEPAVPAAPVEK.[K]	2xLabel:13C(6)15N(2) [K10; K25]	2xLabel:13C(6)15N(2) [K10; K25]			8.24962e-07	0	1	1	20	TGGT1_310420-t26_1-p1	transcript=TGGT1_310420-t26_1 | gene=TGGT1_310420 | organism=Toxoplasma_gondii_GT1 | gene_product=hypothetical protein | transcript_product=hypothetical protein | location=TGGT1_chrXI:1293202-1295045(-) | protein_length=210 | sequence_SO=chromosome | SO=protein_coding	TGGT1_310420-t26_1-p1 [14-38]	0	2446.24	25
FALSE	High	ESGSAASPEKPANPEPAVPAAPVEK	[R].ESGSAASPEKPANPEPAVPAAPVEK.[K]	1xLabel:13C(6)15N(2) [K]	1xLabel:13C(6)15N(2) [K10; K25]			9.74653e-05	0	1	1	11	TGGT1_310420-t26_1-p1	transcript=TGGT1_310420-t26_1 | gene=TGGT1_310420 | organism=Toxoplasma_gondii_GT1 | gene_product=hypothetical protein | transcript_product=hypothetical protein | location=TGGT1_chrXI:1293202-1295045(-) | protein_length=210 | sequence_SO=chromosome | SO=protein_coding	TGGT1_310420-t26_1-p1 [14-38]	0	2438.23	25
FALSE	High	ESGSAASPEKPANPEPAVPAAPVEK	[R].ESGSAASPEKPANPEPAVPAAPVEK.[K]					1.41754e-07	0	1	1	25	TGGT1_310420-t26_1-p1	transcript=TGGT1_310420-t26_1 | gene=TGGT1_310420 | organism=Toxoplasma_gondii_GT1 | gene_product=hypothetical protein | transcript_product=hypothetical protein | location=TGGT1_chrXI:1293202-1295045(-) | protein_length=210 | sequence_SO=chromosome | SO=protein_coding	TGGT1_310420-t26_1-p1 [14-38]	0	2430.21	25	0.685	0.681	-0.55	-0.55	0.0434243	0.0184635	0.373873	0.20435	3.62	0.33	0.685	0.721	0.528	0.681	0.782	0.677	-0.55	-0.47	-0.92	-0.55	-0.36	-0.56	380626	257600	2.81035e+06	2.19637e+06	18.34	2.35	40.85	36.94	380626
FALSE	High	LADAVGVTLGPK	[R].LADAVGVTLGPK.[G]	1xLabel:13C(6)15N(2) [K12]	1xLabel:13C(6)15N(2) [K12]			0.000125683	0	1	1	11	TGGT1_247550-t26_1-p1	transcript=TGGT1_247550-t26_1 | gene=TGGT1_247550 | organism=Toxoplasma_gondii_GT1 | gene_product=heat shock protein HSP60 | transcript_product=heat shock protein HSP60 | location=TGGT1_chrXII:3342084-3346052(-) | protein_length=575 | sequence_SO=chromosome | SO=protein_coding	TGGT1_247550-t26_1-p1 [45-56]	0	1148.68	12
FALSE	High	LADAVQIISYAVDKDLK	[R].LADAVQIISYAVDKDLK.[W]					9.65684e-06	0	1	1	1	TGGT1_290950-t26_1-p1	transcript=TGGT1_290950-t26_1 | gene=TGGT1_290950 | organism=Toxoplasma_gondii_GT1 | gene_product=putative clathrin heavy chain | transcript_product=putative clathrin heavy chain | location=TGGT1_chrIX:3770246-3782423(-) | protein_length=1731 | sequence_SO=chromosome | SO=protein_coding	TGGT1_290950-t26_1-p1 [169-185]	1	1862.03	17	1.047	0.755	0.07	-0.41	0.909579	0.0158784	0.964604	0.20435	68.76	0.43	0.562	1.953	1.047	0.755	0.759	0.67	-0.83	0.97	0.07	-0.41	-0.4	-0.58	8493.56	7800.78	362472	274981	52.48	50.9	63.52	55.93	8493.56
FALSE	High	ESFNHPQFQTDVVKPLQLETIMDQEVQHLSGGELQR	[R].ESFNHPQFQTDVVKPLQLETIMDQEVQHLSGGELQR.[V]					7.39109e-07	0	1	1	1	TGGT1_216790-t26_1-p1	transcript=TGGT1_216790-t26_1 | gene=TGGT1_216790 | organism=Toxoplasma_gondii_GT1 | gene_product=putative ATP-binding cassette sub-family E member 1 | transcript_product=putative ATP-binding cassette sub-family E member 1 | location=TGGT1_chrXI:5800419-5807047(-) | protein_length=613 | sequence_SO=chromosome | SO=protein_coding	TGGT1_216790-t26_1-p1 [447-482]	0	4178.06	36	1.16	1.907	0.21	0.93	0.376199	0.34781	0.730572	0.600445	23.81	65.44	0.973	4.036	1.16	1.065	1.907	100	-0.04	2.01	0.21	0.09	0.93	6.64	4811.61	9971.97	5011.57	9607.85	62.68	36.05	44.23	165.89	10245.3
FALSE	High	VGGASEVEVGEAK	[K].VGGASEVEVGEAK.[D]					1.48308e-05	0	1	1	12	TGGT1_247550-t26_1-p1	transcript=TGGT1_247550-t26_1 | gene=TGGT1_247550 | organism=Toxoplasma_gondii_GT1 | gene_product=heat shock protein HSP60 | transcript_product=heat shock protein HSP60 | location=TGGT1_chrXII:3342084-3346052(-) | protein_length=575 | sequence_SO=chromosome | SO=protein_coding	TGGT1_247550-t26_1-p1 [405-417]	0	1231.62	13	0.801	0.812	-0.32	-0.3	0.0679247	0.0247959	0.449432	0.217298	4.84	0.39	0.801	0.841	0.66	0.815	0.812	0.723	-0.32	-0.25	-0.6	-0.3	-0.3	-0.47	159776	105388	1.78627e+06	1.45592e+06	61.72	65.96	70.93	64.15	313211
FALSE	High	VGGASEVEVGEAK	[K].VGGASEVEVGEAK.[D]	1xLabel:13C(6)15N(2) [K13]	1xLabel:13C(6)15N(2) [K13]			1.55953e-05	0	1	1	10	TGGT1_247550-t26_1-p1	transcript=TGGT1_247550-t26_1 | gene=TGGT1_247550 | organism=Toxoplasma_gondii_GT1 | gene_product=heat shock protein HSP60 | transcript_product=heat shock protein HSP60 | location=TGGT1_chrXII:3342084-3346052(-) | protein_length=575 | sequence_SO=chromosome | SO=protein_coding	TGGT1_247550-t26_1-p1 [405-417]	0	1239.63	13
FALSE	High	VGEYDGACESPSCR	[K].VGEYDGACESPSCR.[E]					0.00011108	0	1	1	3	TGGT1_257680-t26_1-p1	transcript=TGGT1_257680-t26_1 | gene=TGGT1_257680 | organism=Toxoplasma_gondii_GT1 | gene_product=myosin light chain MLC1 | transcript_product=myosin light chain MLC1 | location=TGGT1_chrVIIb:3843366-3845688(+) | protein_length=213 | sequence_SO=chromosome | SO=protein_coding	TGGT1_257680-t26_1-p1 [46-59]	0	1472.58	14	0.175	0.706	-2.51	-0.5	0.0091054	0.830547	0.238541	0.881633	0.01	7.27	0.175	0.276	0.175	1.76	0.636	0.706	-2.51	-1.85	-2.52	0.82	-0.65	-0.5	32164.3	8893.37	13600.8	8651.88	75.1	65.26	166.38	166.33	67418.8
FALSE	High	MFALQDAEQLQLQR	[-].MFALQDAEQLQLQR.[M]	1xAcetyl [N-Term]	1xAcetyl [N-Term]	TGGT1_288245-t26_1-p1 1xAcetyl [N-Term]	TGGT1_288245-t26_1-p1 1xAcetyl [N-Term]	1.55953e-05	0	1	1	1	TGGT1_288245-t26_1-p1	transcript=TGGT1_288245-t26_1 | gene=TGGT1_288245 | organism=Toxoplasma_gondii_GT1 | gene_product=hypothetical protein | transcript_product=hypothetical protein | location=TGGT1_chrIX:2221352-2221510(-) | protein_length=52 | sequence_SO=chromosome | SO=protein_coding	TGGT1_288245-t26_1-p1 [1-14]	0	1732.87	14
FALSE	High	ESNVATAVTALR	[R].ESNVATAVTALR.[R]					9.0348e-05	0	1	1	15	TGGT1_288720-t26_1-p1	transcript=TGGT1_288720-t26_1 | gene=TGGT1_288720 | organism=Toxoplasma_gondii_GT1 | gene_product=ribosomal protein RPL10 | transcript_product=ribosomal protein RPL10 | location=TGGT1_chrIX:2518172-2520490(-) | protein_length=221 | sequence_SO=chromosome | SO=protein_coding	TGGT1_288720-t26_1-p1 [142-153]	0	1231.66	12	0.821	0.72	-0.28	-0.47	0.543374	0.0217599	0.806699	0.210971	15.67	1.45	1.221	0.692	0.821	0.813	0.72	0.707	0.29	-0.53	-0.28	-0.3	-0.47	-0.5	208508	171141	2.53718e+06	1.82737e+06	24.63	51.58	70.36	65.76	237041
FALSE	High	ESNVATAVTALR	[R].ESNVATAVTALR.[R]	1xLabel:13C(6)15N(4) [R12]	1xLabel:13C(6)15N(4) [R12]			0.000197565	0	1	1	12	TGGT1_288720-t26_1-p1	transcript=TGGT1_288720-t26_1 | gene=TGGT1_288720 | organism=Toxoplasma_gondii_GT1 | gene_product=ribosomal protein RPL10 | transcript_product=ribosomal protein RPL10 | location=TGGT1_chrIX:2518172-2520490(-) | protein_length=221 | sequence_SO=chromosome | SO=protein_coding	TGGT1_288720-t26_1-p1 [142-153]	0	1241.67	12
FALSE	High	VGEAVDIVGQVGR	[R].VGEAVDIVGQVGR.[Q]	1xLabel:13C(6)15N(4) [R13]	1xLabel:13C(6)15N(4) [R13]			5.88553e-05	0	1	1	2	TGGT1_313410-t26_1-p1	transcript=TGGT1_313410-t26_1 | gene=TGGT1_313410 | organism=Toxoplasma_gondii_GT1 | gene_product=proteasome 26S regulatory subunit | transcript_product=proteasome 26S regulatory subunit | location=TGGT1_chrXI:3312986-3323185(+) | protein_length=1091 | sequence_SO=chromosome | SO=protein_coding	TGGT1_313410-t26_1-p1 [1024-1036]	0	1308.71	13
FALSE	High	VGEEDKDMVDMAYR	[K].VGEEDKDMVDMAYR.[V]					6.73885e-05	0	1	1	5	TGGT1_219540-t26_1-p1	transcript=TGGT1_219540-t26_1 | gene=TGGT1_219540 | organism=Toxoplasma_gondii_GT1 | gene_product=cytosolic tRNA-Ala synthetase | transcript_product=cytosolic tRNA-Ala synthetase | location=TGGT1_chrXII:800723-814444(-) | protein_length=1280 | sequence_SO=chromosome | SO=protein_coding	TGGT1_219540-t26_1-p1 [546-559]	1	1657.72	14	1.346	1.068	0.43	0.1	0.639409	0.465218	0.850157	0.632943	111.93	15.74	1.346	13.075	0.33	0.04	1.068	1.182	0.43	3.71	-1.6	-4.65	0.1	0.24	2950.26	4176.92	393153	420015	111	81.28	88.14	118.92	2950.26
FALSE	High	METLLQSLLTK	[R].METLLQSLLTK.[S]	1xLabel:13C(6)15N(2) [K11]	1xLabel:13C(6)15N(2) [K11]			0.000107748	0	1	1	3	TGGT1_219310-t26_1-p1	transcript=TGGT1_219310-t26_1 | gene=TGGT1_219310 | organism=Toxoplasma_gondii_GT1 | gene_product=DnaK family protein | transcript_product=DnaK family protein | location=TGGT1_chrXII:915528-922343(+) | protein_length=818 | sequence_SO=chromosome | SO=protein_coding	TGGT1_219310-t26_1-p1 [319-329]	0	1284.73	11	0.709	0.832	-0.5	-0.27	0.524943	0.00393549	0.79801	0.197599	63.65	1.32	1.919	0.709	0.103	0.832	0.821	0.853	0.94	-0.5	-3.28	-0.27	-0.28	-0.23	6367.86	2708.34	746819	621340	84.94	101.16	87.77	89.58	6367.86
FALSE	High	VGEGPFPTELTDAIGLHLR	[R].VGEGPFPTELTDAIGLHLR.[E]					4.5622e-06	0	1	1	1	TGGT1_279450-t26_1-p1	transcript=TGGT1_279450-t26_1 | gene=TGGT1_279450 | organism=Toxoplasma_gondii_GT1 | gene_product=putative adenylosuccinate synthetase | transcript_product=putative adenylosuccinate synthetase | location=TGGT1_chrIX:18516-19898(+) | protein_length=460 | sequence_SO=chromosome | SO=protein_coding	TGGT1_279450-t26_1-p1 [302-320]	0	2022.07	19
FALSE	High	IAAYGCNVFINR	[K].IAAYGCNVFINR.[Q]					0.000156987	0	1	1	1	TGGT1_243710-t26_1-p1	transcript=TGGT1_243710-t26_1 | gene=TGGT1_243710 | organism=Toxoplasma_gondii_GT1 | gene_product=t-complex protein beta subunit | transcript_product=t-complex protein beta subunit | location=TGGT1_chrVI:2717493-2725570(+) | protein_length=568 | sequence_SO=chromosome | SO=protein_coding	TGGT1_243710-t26_1-p1 [285-296]	0	1340.68	12
FALSE	High	METLLQSLLTK	[R].METLLQSLLTK.[S]	1xOxidation [M1]; 1xLabel:13C(6)15N(2) [K11]	1xOxidation [M1]; 1xLabel:13C(6)15N(2) [K11]			0.000205488	0	1	1	1	TGGT1_219310-t26_1-p1	transcript=TGGT1_219310-t26_1 | gene=TGGT1_219310 | organism=Toxoplasma_gondii_GT1 | gene_product=DnaK family protein | transcript_product=DnaK family protein | location=TGGT1_chrXII:915528-922343(+) | protein_length=818 | sequence_SO=chromosome | SO=protein_coding	TGGT1_219310-t26_1-p1 [319-329]	0	1300.73	11
FALSE	High	ESSLVEGYALK	[R].ESSLVEGYALK.[A]					0.000196102	0	1	1	7	TGGT1_229990-t26_1-p1	transcript=TGGT1_229990-t26_1 | gene=TGGT1_229990 | organism=Toxoplasma_gondii_GT1 | gene_product=putative T-complex protein 1 subunit alpha | transcript_product=putative T-complex protein 1 subunit alpha | location=TGGT1_chrVIII:493249-499968(-) | protein_length=548 | sequence_SO=chromosome | SO=protein_coding	TGGT1_229990-t26_1-p1 [205-215]	0	1195.62	11	0.415	0.647	-1.27	-0.63	0.0162947	0.291734	0.267708	0.575269	3.15	13.36	0.363	0.527	0.415	1.122	0.647	0.507	-1.46	-0.92	-1.27	0.17	-0.63	-0.98	25499.1	13448.3	583840	515801	64.07	55.81	80.19	48.31	43467.7
FALSE	High	IAAVVSGESPVVISK	[K].IAAVVSGESPVVISK.[F]	1xLabel:13C(6)15N(2) [K15]	1xLabel:13C(6)15N(2) [K15]			9.00938e-05	0	1	1	1	TGGT1_215260-t26_1-p1	transcript=TGGT1_215260-t26_1 | gene=TGGT1_215260 | organism=Toxoplasma_gondii_GT1 | gene_product=carbamoylphosphate synthetase | transcript_product=carbamoylphosphate synthetase | location=TGGT1_chrX:6736108-6760149(-) | protein_length=1699 | sequence_SO=chromosome | SO=protein_coding	TGGT1_215260-t26_1-p1 [1307-1321]	0	1463.86	15	0.4	0.728	-1.32	-0.46	0.224612	0.424473	0.657737	0.618828	13.91	69.19	1.003	0.4	0.165	1.369	0.728	0.01	0	-1.32	-2.6	0.45	-0.46	-6.64	6407.66	4024.95	11742.3	8548.97	53.29	59.32	164.9	53.32	4011.51
FALSE	High	VGEGPFPTELTDAIGLHLR	[R].VGEGPFPTELTDAIGLHLR.[E]	1xLabel:13C(6)15N(4) [R19]	1xLabel:13C(6)15N(4) [R19]			7.86406e-05	0	1	1	1	TGGT1_279450-t26_1-p1	transcript=TGGT1_279450-t26_1 | gene=TGGT1_279450 | organism=Toxoplasma_gondii_GT1 | gene_product=putative adenylosuccinate synthetase | transcript_product=putative adenylosuccinate synthetase | location=TGGT1_chrIX:18516-19898(+) | protein_length=460 | sequence_SO=chromosome | SO=protein_coding	TGGT1_279450-t26_1-p1 [302-320]	0	2032.07	19	1.563	0.704	0.64	-0.51	0.614144	0.64352	0.839838	0.746372	100.2	5.67	3.34	0.507	1.563	8.63	0.65	0.704	1.74	-0.98	0.64	3.11	-0.62	-0.51	6785.87	8361.55	12374.1	9463.42	59.49	33.85	167.32	162.51	2503.32
FALSE	High	ESSIDLVMDLPGFTK	[K].ESSIDLVMDLPGFTK.[D]					8.94122e-06	0	1	1	6	TGGT1_324600-t26_1-p1	transcript=TGGT1_324600-t26_1 | gene=TGGT1_324600 | organism=Toxoplasma_gondii_GT1 | gene_product=heat shock protein | transcript_product=heat shock protein | location=TGGT1_chrVIII:2284363-2285174(-) | protein_length=185 | sequence_SO=chromosome | SO=protein_coding	TGGT1_324600-t26_1-p1 [73-87]	0	1651.82	15
FALSE	High	TEEQAFALGPPR	[R].TEEQAFALGPPR.[R]	1xLabel:13C(6)15N(4) [R12]	1xLabel:13C(6)15N(4) [R12]			3.45498e-05	0	1	1	14	TGGT1_410360-t26_1-p1	transcript=TGGT1_410360-t26_1 | gene=TGGT1_410360 | organism=Toxoplasma_gondii_GT1 | gene_product=putative transmembrane protein | transcript_product=putative transmembrane protein | location=TGGT1_chrII:71310-72374(+) | protein_length=354 | sequence_SO=chromosome | SO=protein_coding	TGGT1_410360-t26_1-p1 [62-73]	0	1325.67	12
FALSE	High	ESQAQQQQEEIR	[K].ESQAQQQQEEIR.[A]	1xLabel:13C(6)15N(4) [R12]	1xLabel:13C(6)15N(4) [R12]			8.9335e-05	0	1	1	6	TGGT1_235970-t26_1-p1	transcript=TGGT1_235970-t26_1 | gene=TGGT1_235970 | organism=Toxoplasma_gondii_GT1 | gene_product=putative eukaryotic initiation factor-2 gamma | transcript_product=putative eukaryotic initiation factor-2 gamma | location=TGGT1_chrX:5097473-5103737(+) | protein_length=465 | sequence_SO=chromosome | SO=protein_coding	TGGT1_235970-t26_1-p1 [191-202]	0	1483.7	12
FALSE	High	ESQAQQQQEEIR	[K].ESQAQQQQEEIR.[A]					0.000136329	0	1	1	7	TGGT1_235970-t26_1-p1	transcript=TGGT1_235970-t26_1 | gene=TGGT1_235970 | organism=Toxoplasma_gondii_GT1 | gene_product=putative eukaryotic initiation factor-2 gamma | transcript_product=putative eukaryotic initiation factor-2 gamma | location=TGGT1_chrX:5097473-5103737(+) | protein_length=465 | sequence_SO=chromosome | SO=protein_coding	TGGT1_235970-t26_1-p1 [191-202]	0	1473.69	12	1.245	0.866	0.32	-0.21	0.900478	0.237042	0.961593	0.537324	118.49	6.44	1.245	2.414	0.25	0.916	0.866	0.534	0.32	1.27	-2	-0.13	-0.21	-0.91	12806.9	22317.8	480032	439831	62.92	81.06	62.92	33.91	29499
FALSE	High	TEEQAFALGPPR	[R].TEEQAFALGPPR.[R]					2.28259e-05	0	1	1	13	TGGT1_410360-t26_1-p1	transcript=TGGT1_410360-t26_1 | gene=TGGT1_410360 | organism=Toxoplasma_gondii_GT1 | gene_product=putative transmembrane protein | transcript_product=putative transmembrane protein | location=TGGT1_chrII:71310-72374(+) | protein_length=354 | sequence_SO=chromosome | SO=protein_coding	TGGT1_410360-t26_1-p1 [62-73]	0	1315.66	12	0.12	0.473	-3.06	-1.08	0.0183203	0.0837152	0.274664	0.346722	0.62	5.67	0.084	0.12	0.22	0.554	0.212	0.473	-3.57	-3.06	-2.19	-0.85	-2.24	-1.08	69726	8911.34	1.38445e+06	438526	33.61	21.14	110.95	125.43	105641
FALSE	High	ESNYDFPGNSLILEVQPHPSVR	[R].ESNYDFPGNSLILEVQPHPSVR.[F]	1xLabel:13C(6)15N(4) [R22]	1xLabel:13C(6)15N(4) [R22]			3.68482e-05	0	1	1	4	TGGT1_294200-t26_1-p1	transcript=TGGT1_294200-t26_1 | gene=TGGT1_294200 | organism=Toxoplasma_gondii_GT1 | gene_product=glucose-6-phosphate 1-dehydrogenase | transcript_product=glucose-6-phosphate 1-dehydrogenase | location=TGGT1_chrIa:683542-690397(+) | protein_length=560 | sequence_SO=chromosome | SO=protein_coding	TGGT1_294200-t26_1-p1 [413-434]	0	2508.24	22
FALSE	High	ESNYDFPGNSLILEVQPHPSVR	[R].ESNYDFPGNSLILEVQPHPSVR.[F]					9.11146e-05	0	1	1	3	TGGT1_294200-t26_1-p1	transcript=TGGT1_294200-t26_1 | gene=TGGT1_294200 | organism=Toxoplasma_gondii_GT1 | gene_product=glucose-6-phosphate 1-dehydrogenase | transcript_product=glucose-6-phosphate 1-dehydrogenase | location=TGGT1_chrIa:683542-690397(+) | protein_length=560 | sequence_SO=chromosome | SO=protein_coding	TGGT1_294200-t26_1-p1 [413-434]	0	2498.23	22	1.482	0.987	0.57	-0.02	0.795989	0.518142	0.920078	0.663242	14	1.12	1.622	0.24	1.482	0.979	0.987	1.241	0.7	-2.06	0.57	-0.03	-0.02	0.31	8589.98	5291.4	916156	903976	64.45	68.17	67.49	81.4	3261.74
FALSE	High	ESSIDLVMDLPGFTK	[K].ESSIDLVMDLPGFTK.[D]	1xLabel:13C(6)15N(2) [K15]	1xLabel:13C(6)15N(2) [K15]			0.000104507	0	1	1	4	TGGT1_324600-t26_1-p1	transcript=TGGT1_324600-t26_1 | gene=TGGT1_324600 | organism=Toxoplasma_gondii_GT1 | gene_product=heat shock protein | transcript_product=heat shock protein | location=TGGT1_chrVIII:2284363-2285174(-) | protein_length=185 | sequence_SO=chromosome | SO=protein_coding	TGGT1_324600-t26_1-p1 [73-87]	0	1659.84	15	1.018	0.726	0.03	-0.46	0.481479	0.00676152	0.781142	0.197599	35.07	1.94	1.258	0.081	1.018	0.744	0.678	0.726	0.33	-3.63	0.03	-0.43	-0.56	-0.46	10777.4	6357.85	1.19023e+06	806874	34.69	89.79	91.45	92.87	10777.4
FALSE	High	FAAEIAHNISSR	[K].FAAEIAHNISSR.[K]					2.8216e-05	0	1	1	24	TGGT1_267400-t26_1-p1	transcript=TGGT1_267400-t26_1 | gene=TGGT1_267400 | organism=Toxoplasma_gondii_GT1 | gene_product=ribosomal protein RPL32 | transcript_product=ribosomal protein RPL32 | location=TGGT1_chrIX:508439-508944(-) | protein_length=134 | sequence_SO=chromosome | SO=protein_coding	TGGT1_267400-t26_1-p1 [94-105]	0	1315.68	12	0.19	0.886	-2.39	-0.17	0.107635	0.54952	0.539659	0.683248	3.44	0.16	0.19	0.312	0.025	0.886	0.885	3.176	-2.39	-1.68	-5.35	-0.17	-0.18	1.67	448306	107024	2.50004e+06	4.59524e+06	17.37	75.82	70.69	39.42	562791
FALSE	High	FAAEIAHNISSR	[K].FAAEIAHNISSR.[K]	1xLabel:13C(6)15N(4) [R12]	1xLabel:13C(6)15N(4) [R12]			2.28933e-05	0	1	1	21	TGGT1_267400-t26_1-p1	transcript=TGGT1_267400-t26_1 | gene=TGGT1_267400 | organism=Toxoplasma_gondii_GT1 | gene_product=ribosomal protein RPL32 | transcript_product=ribosomal protein RPL32 | location=TGGT1_chrIX:508439-508944(-) | protein_length=134 | sequence_SO=chromosome | SO=protein_coding	TGGT1_267400-t26_1-p1 [94-105]	0	1325.68	12
FALSE	High	FAAFGATLPGVEQYAVLK	[K].FAAFGATLPGVEQYAVLK.[F]					9.1629e-05	0	1	1	1	TGGT1_287500-t26_1-p1	transcript=TGGT1_287500-t26_1 | gene=TGGT1_287500 | organism=Toxoplasma_gondii_GT1 | gene_product=putative T complex chaperonin | transcript_product=putative T complex chaperonin | location=TGGT1_chrV:438209-443517(-) | protein_length=556 | sequence_SO=chromosome | SO=protein_coding	TGGT1_287500-t26_1-p1 [421-438]	0	1882.01	18	0.425	0.822	-1.23	-0.28	0.156879	0.293786	0.600752	0.575711	5.75	25.74	0.073	0.425	0.516	0.822	1.039	0.61	-3.77	-1.23	-0.95	-0.28	0.06	-0.71	10182.8	2844.17	9461.87	9833.19	39.51	78.77	169.01	166.84	10182.8
FALSE	High	FGSVVAFLLEK	[K].FGSVVAFLLEK.[S]					0.00011965	0	1	1	6	TGGT1_235470-t26_1-p1	transcript=TGGT1_235470-t26_1 | gene=TGGT1_235470 | organism=Toxoplasma_gondii_GT1 | gene_product=myosin A | transcript_product=myosin A | location=TGGT1_chrX:4773284-4778894(+) | protein_length=831 | sequence_SO=chromosome | SO=protein_coding	TGGT1_235470-t26_1-p1 [266-276]	0	1209.69	11
FALSE	High	FGSVLENVIIDGTTR	[R].FGSVLENVIIDGTTR.[V]	1xLabel:13C(6)15N(4) [R15]	1xLabel:13C(6)15N(4) [R15]			1.80786e-05	0	1	1	6	TGGT1_289650-t26_1-p1	transcript=TGGT1_289650-t26_1 | gene=TGGT1_289650 | organism=Toxoplasma_gondii_GT1 | gene_product=PEP-carboxykinase I | transcript_product=PEP-carboxykinase I | location=TGGT1_chrIX:3173228-3176423(+) | protein_length=677 | sequence_SO=chromosome | SO=protein_coding	TGGT1_289650-t26_1-p1 [437-451]	0	1630.87	15
FALSE	High	FGSVLENVIIDGTTR	[R].FGSVLENVIIDGTTR.[V]					1.03373e-05	0	1	1	8	TGGT1_289650-t26_1-p1	transcript=TGGT1_289650-t26_1 | gene=TGGT1_289650 | organism=Toxoplasma_gondii_GT1 | gene_product=PEP-carboxykinase I | transcript_product=PEP-carboxykinase I | location=TGGT1_chrIX:3173228-3176423(+) | protein_length=677 | sequence_SO=chromosome | SO=protein_coding	TGGT1_289650-t26_1-p1 [437-451]	0	1620.86	15	2.74	0.939	1.45	-0.09	0.0177829	0.443894	0.274664	0.624486	23.58	21.67	2.043	3.176	2.74	0.784	0.939	100	1.03	1.67	1.45	-0.35	-0.09	6.64	108164	332982	1.53512e+06	1625523	74.42	78.39	86.98	81.01	108164
FALSE	High	FGSITSLVVR	[K].FGSITSLVVR.[K]	1xLabel:13C(6)15N(4) [R10]	1xLabel:13C(6)15N(4) [R10]			0.000195131	0	1	1	10	TGGT1_224850-t26_1-p1	transcript=TGGT1_224850-t26_1 | gene=TGGT1_224850 | organism=Toxoplasma_gondii_GT1 | gene_product=putative polyadenylate binding protein | transcript_product=putative polyadenylate binding protein | location=TGGT1_chrX:2687512-2689821(+) | protein_length=769 | sequence_SO=chromosome | SO=protein_coding	TGGT1_224850-t26_1-p1 [285-294]	0	1088.63	10
FALSE	High	KLTTVLPGAVLTAK	[R].KLTTVLPGAVLTAK.[V]	2xLabel:13C(6)15N(2) [K1; K14]	2xLabel:13C(6)15N(2) [K1; K14]			4.23943e-05	0	1	1	32	TGGT1_271050-t26_1-p1	transcript=TGGT1_271050-t26_1 | gene=TGGT1_271050 | organism=Toxoplasma_gondii_GT1 | gene_product=SAG-related sequence SRS34A | transcript_product=SAG-related sequence SRS34A | location=TGGT1_chrVIII:4754604-4755164(+) | protein_length=186 | sequence_SO=chromosome | SO=protein_coding	TGGT1_271050-t26_1-p1 [82-95]	1	1427.92	14
FALSE	High	VDPDTGAVATEACASFLK	[K].VDPDTGAVATEACASFLK.[L]	1xLabel:13C(6)15N(2) [K18]	1xLabel:13C(6)15N(2) [K18]			0.000110773	0	1	1	1	TGGT1_206480-t26_1-p1	transcript=TGGT1_206480-t26_1 | gene=TGGT1_206480 | organism=Toxoplasma_gondii_GT1 | gene_product=hypothetical protein | transcript_product=hypothetical protein | location=TGGT1_chrVIIa:919383-921082(-) | protein_length=207 | sequence_SO=chromosome | SO=protein_coding	TGGT1_206480-t26_1-p1 [183-200]	0	1802.87	18	2.125	0.93	1.09	-0.11	0.24656	0.573801	0.671866	0.697798	27.08	3.75	2.125	2.513	0.892	2.019	0.902	0.93	1.09	1.33	-0.17	1.01	-0.15	-0.11	5531.83	12294.3	11350.8	13416.8	96.64	69.12	168.82	167.04	918.731
FALSE	High	VDSLNLLQLAPGGALGR	[K].VDSLNLLQLAPGGALGR.[F]					3.99203e-06	0	1	1	11	TGGT1_309120-t26_1-p1	transcript=TGGT1_309120-t26_1 | gene=TGGT1_309120 | organism=Toxoplasma_gondii_GT1 | gene_product=ribosomal protein RPL4 | transcript_product=ribosomal protein RPL4 | location=TGGT1_chrXI:476484-477734(-) | protein_length=416 | sequence_SO=chromosome | SO=protein_coding	TGGT1_309120-t26_1-p1 [233-249]	0	1693.96	17
FALSE	High	FGPLDAQPAHASVR	[R].FGPLDAQPAHASVR.[E]					0.000131981	0	1	1	6	TGGT1_230940-t26_1-p1	transcript=TGGT1_230940-t26_1 | gene=TGGT1_230940 | organism=Toxoplasma_gondii_GT1 | gene_product=hypothetical protein | transcript_product=hypothetical protein | location=TGGT1_chrVIII:1112065-1119747(+) | protein_length=1523 | sequence_SO=chromosome | SO=protein_coding	TGGT1_230940-t26_1-p1 [711-724]	0	1465.75	14	0.268	0.663	-1.9	-0.59	0.26287	0.15911	0.678447	0.479305	4.6	16.63	1.283	0.152	0.268	0.663	0.925	0.494	0.36	-2.72	-1.9	-0.59	-0.11	-1.02	56929.2	8635.06	402410	372149	94.94	98.65	63.59	38.2	2865.57
FALSE	High	VDSLNLLQLAPGGALGR	[K].VDSLNLLQLAPGGALGR.[F]	1xLabel:13C(6)15N(4) [R17]	1xLabel:13C(6)15N(4) [R17]			8.57806e-06	0	1	1	10	TGGT1_309120-t26_1-p1	transcript=TGGT1_309120-t26_1 | gene=TGGT1_309120 | organism=Toxoplasma_gondii_GT1 | gene_product=ribosomal protein RPL4 | transcript_product=ribosomal protein RPL4 | location=TGGT1_chrXI:476484-477734(-) | protein_length=416 | sequence_SO=chromosome | SO=protein_coding	TGGT1_309120-t26_1-p1 [233-249]	0	1703.97	17	0.65	0.837	-0.62	-0.26	0.286807	0.0754608	0.694079	0.329785	15.35	6.96	0.81	0.083	0.65	0.837	0.893	0.731	-0.3	-3.59	-0.62	-0.26	-0.16	-0.45	277466	224615	1.78782e+06	1495579	59.13	86.38	111.54	103.38	277466
FALSE	High	LWGNNFYNAK	[R].LWGNNFYNAK.[E]	1xLabel:13C(6)15N(2) [K10]	1xLabel:13C(6)15N(2) [K10]			0.000216198	0	1	1	6	TGGT1_205470-t26_1-p1	transcript=TGGT1_205470-t26_1 | gene=TGGT1_205470 | organism=Toxoplasma_gondii_GT1 | gene_product=putative translation elongation factor 2 family protein | transcript_product=putative translation elongation factor 2 family protein | location=TGGT1_chrVIIa:1297616-1301283(+) | protein_length=832 | sequence_SO=chromosome | SO=protein_coding	TGGT1_205470-t26_1-p1 [238-247]	0	1234.61	10
FALSE	High	KIVKPQGVEPTEIENEVAK	[K].KIVKPQGVEPTEIENEVAK.[C]					9.37132e-05	0	1	1	5	TGGT1_239100-t26_1-p1	transcript=TGGT1_239100-t26_1 | gene=TGGT1_239100 | organism=Toxoplasma_gondii_GT1 | gene_product=ribosomal protein RPS7 | transcript_product=ribosomal protein RPS7 | location=TGGT1_chrVI:457170-458270(+) | protein_length=196 | sequence_SO=chromosome | SO=protein_coding	TGGT1_239100-t26_1-p1 [7-25]	1	2108.16	19	1.054	0.545	0.08	-0.88	0.999598	0.0230844	0.999651	0.213376	108.55	3.73	0.282	1.054	3.36	0.545	0.67	0.498	-1.83	0.08	1.75	-0.88	-0.58	-1	11128.7	9705.91	429492	287928	103.55	18.71	65.16	53.41	34399.2
FALSE	High	SAYPHHPTEDSTGGGGSPSHTR	[R].SAYPHHPTEDSTGGGGSPSHTR.[D]	1xLabel:13C(6)15N(4) [R22]	1xLabel:13C(6)15N(4) [R22]			2.1276e-06	0	1	1	8	TGGT1_247520-t26_1-p1	transcript=TGGT1_247520-t26_1 | gene=TGGT1_247520 | organism=Toxoplasma_gondii_GT1 | gene_product=hypothetical protein | transcript_product=hypothetical protein | location=TGGT1_chrXII:3323216-3323986(-) | protein_length=256 | sequence_SO=chromosome | SO=protein_coding	TGGT1_247520-t26_1-p1 [228-249]	0	2244.99	22
FALSE	High	FGIVEGLMTTVHAMTANQLTVDGPSK	[K].FGIVEGLMTTVHAMTANQLTVDGPSK.[G]	1xOxidation [M]	1xOxidation [M8; M14]			5.66499e-06	0	1	1	10	TGGT1_289690-t26_1-p1	transcript=TGGT1_289690-t26_1 | gene=TGGT1_289690 | organism=Toxoplasma_gondii_GT1 | gene_product=glyceraldehyde-3-phosphate dehydrogenase GAPDH1 | transcript_product=glyceraldehyde-3-phosphate dehydrogenase GAPDH1 | location=TGGT1_chrIX:3189155-3191218(-) | protein_length=489 | sequence_SO=chromosome | SO=protein_coding	TGGT1_289690-t26_1-p1 [317-342]	0	2733.36	26	0.607	0.877	-0.72	-0.19	0.783331	0.387979	0.914581	0.607468	38.99	1.06	0.607	0.174	4.017	0.877	0.885	0.016	-0.72	-2.53	2.01	-0.19	-0.18	-6	6154.53	3735.1	305356	237412	80.95	60.87	58.68	81.36	6154.53
FALSE	High	FGIVEGLMTTVHAMTANQLTVDGPSK	[K].FGIVEGLMTTVHAMTANQLTVDGPSK.[G]	1xLabel:13C(6)15N(2) [K26]	1xLabel:13C(6)15N(2) [K26]			2.78017e-10	0	1	1	3	TGGT1_289690-t26_1-p1	transcript=TGGT1_289690-t26_1 | gene=TGGT1_289690 | organism=Toxoplasma_gondii_GT1 | gene_product=glyceraldehyde-3-phosphate dehydrogenase GAPDH1 | transcript_product=glyceraldehyde-3-phosphate dehydrogenase GAPDH1 | location=TGGT1_chrIX:3189155-3191218(-) | protein_length=489 | sequence_SO=chromosome | SO=protein_coding	TGGT1_289690-t26_1-p1 [317-342]	0	2725.38	26
FALSE	High	FGIVEGLMTTVHAMTANQLTVDGPSK	[K].FGIVEGLMTTVHAMTANQLTVDGPSK.[G]					8.22989e-05	0	1	1	1	TGGT1_289690-t26_1-p1	transcript=TGGT1_289690-t26_1 | gene=TGGT1_289690 | organism=Toxoplasma_gondii_GT1 | gene_product=glyceraldehyde-3-phosphate dehydrogenase GAPDH1 | transcript_product=glyceraldehyde-3-phosphate dehydrogenase GAPDH1 | location=TGGT1_chrIX:3189155-3191218(-) | protein_length=489 | sequence_SO=chromosome | SO=protein_coding	TGGT1_289690-t26_1-p1 [317-342]	0	2717.36	26	0.706	1.186	-0.5	0.25	0.323104	0.0500011	0.704814	0.267584	30.53	0.42	0.998	0.164	0.706	1.186	1.183	1.382	0	-2.61	-0.5	0.25	0.24	0.47	9124.07	9103.36	1393778	1.64883e+06	119.32	40.95	89.5	89.5	9124.07
FALSE	High	FGSVVAFLLEK	[K].FGSVVAFLLEK.[S]	1xLabel:13C(6)15N(2) [K11]	1xLabel:13C(6)15N(2) [K11]			0.000161576	0	1	1	6	TGGT1_235470-t26_1-p1	transcript=TGGT1_235470-t26_1 | gene=TGGT1_235470 | organism=Toxoplasma_gondii_GT1 | gene_product=myosin A | transcript_product=myosin A | location=TGGT1_chrX:4773284-4778894(+) | protein_length=831 | sequence_SO=chromosome | SO=protein_coding	TGGT1_235470-t26_1-p1 [266-276]	0	1217.7	11	0.703	0.765	-0.51	-0.39	0.232084	0.00225522	0.658279	0.197599	12.33	0.9	0.703	0.236	0.821	0.758	0.789	0.765	-0.51	-2.08	-0.28	-0.4	-0.34	-0.39	27780.7	6559.94	1.5078e+06	1.19034e+06	67.74	95.68	52.22	51.7	43809
FALSE	High	FGLTSEDVESAVIYNHK	[K].FGLTSEDVESAVIYNHK.[E]	1xLabel:13C(6)15N(2) [K17]	1xLabel:13C(6)15N(2) [K17]			1.23922e-06	0	1	1	10	TGGT1_215430-t26_1-p1	transcript=TGGT1_215430-t26_1 | gene=TGGT1_215430 | organism=Toxoplasma_gondii_GT1 | gene_product=hypothetical protein | transcript_product=hypothetical protein | location=TGGT1_chrX:6843523-6847906(-) | protein_length=244 | sequence_SO=chromosome | SO=protein_coding	TGGT1_215430-t26_1-p1 [199-215]	0	1916.95	17	16.766	0.704	4.07	-0.51	0.0374572	0.609262	0.356088	0.724251	12.39	3.73	4.204	18.167	16.766	0.704	1.39	0.668	2.07	4.18	4.07	-0.51	0.47	-0.58	1860.91	33807.5	872413	981345	107.3	21.42	90.31	66.84	10927.8
FALSE	High	KLTTVLPGAVLTAK	[R].KLTTVLPGAVLTAK.[V]					1.80786e-05	0	1	1	38	TGGT1_271050-t26_1-p1	transcript=TGGT1_271050-t26_1 | gene=TGGT1_271050 | organism=Toxoplasma_gondii_GT1 | gene_product=SAG-related sequence SRS34A | transcript_product=SAG-related sequence SRS34A | location=TGGT1_chrVIII:4754604-4755164(+) | protein_length=186 | sequence_SO=chromosome | SO=protein_coding	TGGT1_271050-t26_1-p1 [82-95]	1	1411.89	14	0.694	0.706	-0.53	-0.5	0.0123953	0.0760591	0.251092	0.330601	0.65	1.74	0.687	0.772	0.694	0.706	0.89	0.689	-0.54	-0.37	-0.53	-0.5	-0.17	-0.54	1.82118e+06	1.32049e+06	2.91649e+07	2.59691e+07	52.72	49.54	53.16	47.23	1.82118e+06
FALSE	High	FGVSIPDEEASK	[K].FGVSIPDEEASK.[I]					0.000133778	0	1	1	9	TGGT1_264080-t26_1-p1	transcript=TGGT1_264080-t26_1 | gene=TGGT1_264080 | organism=Toxoplasma_gondii_GT1 | gene_product=acyl carrier protein ACP | transcript_product=acyl carrier protein ACP | location=TGGT1_chrVIIb:176277-177755(-) | protein_length=183 | sequence_SO=chromosome | SO=protein_coding	TGGT1_264080-t26_1-p1 [153-164]	0	1278.62	12	3.068	0.01	1.62	-6.64	0.693288	0.729524	0.873521	0.80797	138.81	0	0.196	3.068	7.451	0.01	0.01	100	-2.35	1.62	2.9	-6.64	-6.64	6.64	3311.24	10159.1	1454839	12275.2	51.72	77.49	85.69	170.98	5312.61
FALSE	High	VDIIPNDQGNR	[R].VDIIPNDQGNR.[I]					0.000208007	0	1	1	19	TGGT1_311720-t26_1-p1	transcript=TGGT1_311720-t26_1 | gene=TGGT1_311720 | organism=Toxoplasma_gondii_GT1 | gene_product=chaperonin protein BiP | transcript_product=chaperonin protein BiP | location=TGGT1_chrXI:2188121-2191497(-) | protein_length=668 | sequence_SO=chromosome | SO=protein_coding	TGGT1_311720-t26_1-p1 [61-71]	0	1240.63	11	0.872	0.807	-0.2	-0.31	0.123401	0.00227812	0.565386	0.197599	0.59	1.02	0.868	0.978	0.872	0.815	0.807	0.787	-0.2	-0.03	-0.2	-0.29	-0.31	-0.35	365664	357534	5.82709e+06	4.70084e+06	59.51	55.58	32.97	31.02	914707
FALSE	High	VDLPSSISQADWER	[R].VDLPSSISQADWER.[I]					1.11974e-05	0	1	1	2	TGGT1_248810-t26_1-p1	transcript=TGGT1_248810-t26_1 | gene=TGGT1_248810 | organism=Toxoplasma_gondii_GT1 | gene_product=nuclear factor NF7 | transcript_product=nuclear factor NF7 | location=TGGT1_chrXII:4119880-4123828(+) | protein_length=497 | sequence_SO=chromosome | SO=protein_coding	TGGT1_248810-t26_1-p1 [29-42]	0	1602.78	14	0.659	38.352	-0.6	5.26	0.832161	0.215382	0.936247	0.521793	33.11	28.09	0.32	10.126	0.659	45.62	38.352	0.756	-1.64	3.34	-0.6	5.51	5.26	-0.4	2923.48	4005.18	6859.43	263074	104.49	135.75	171.51	105.59	12504.3
FALSE	High	VDLPSSISQADWER	[R].VDLPSSISQADWER.[I]	1xLabel:13C(6)15N(4) [R14]	1xLabel:13C(6)15N(4) [R14]			1.41455e-05	0	1	1	1	TGGT1_248810-t26_1-p1	transcript=TGGT1_248810-t26_1 | gene=TGGT1_248810 | organism=Toxoplasma_gondii_GT1 | gene_product=nuclear factor NF7 | transcript_product=nuclear factor NF7 | location=TGGT1_chrXII:4119880-4123828(+) | protein_length=497 | sequence_SO=chromosome | SO=protein_coding	TGGT1_248810-t26_1-p1 [29-42]	0	1612.78	14
FALSE	High	FHIEEEGKGVDEQGNK	[R].FHIEEEGKGVDEQGNK.[I]	2xLabel:13C(6)15N(2) [K8; K16]	2xLabel:13C(6)15N(2) [K8; K16]			0.000119322	0	1	1	4	TGGT1_318230-t26_1-p1	transcript=TGGT1_318230-t26_1 | gene=TGGT1_318230 | organism=Toxoplasma_gondii_GT1 | gene_product=phosphoglycerate kinase PGKI | transcript_product=phosphoglycerate kinase PGKI | location=TGGT1_chrIV:1413955-1416908(+) | protein_length=417 | sequence_SO=chromosome | SO=protein_coding	TGGT1_318230-t26_1-p1 [124-139]	1	1831.88	16	1.039	0.902	0.06	-0.15	0.73641	0.618404	0.893164	0.730422	5.58	2.87	1.039	1.078	0.801	0.902	2.043	0.881	0.06	0.11	-0.32	-0.15	1.03	-0.18	252250	271925	459526	672300	29.43	14.79	36.76	44.73	211504
FALSE	High	FHIEEEGKGVDEQGNK	[R].FHIEEEGKGVDEQGNK.[I]					0.0001521	0	1	1	7	TGGT1_318230-t26_1-p1	transcript=TGGT1_318230-t26_1 | gene=TGGT1_318230 | organism=Toxoplasma_gondii_GT1 | gene_product=phosphoglycerate kinase PGKI | transcript_product=phosphoglycerate kinase PGKI | location=TGGT1_chrIV:1413955-1416908(+) | protein_length=417 | sequence_SO=chromosome | SO=protein_coding	TGGT1_318230-t26_1-p1 [124-139]	1	1815.85	16
FALSE	High	SDATSATTNDGVADSEGEVHTFK	[K].SDATSATTNDGVADSEGEVHTFK.[A]					0.000167566	0	1	1	5	TGGT1_292920-t26_1-p1	transcript=TGGT1_292920-t26_1 | gene=TGGT1_292920 | organism=Toxoplasma_gondii_GT1 | gene_product=putative heat shock protein 75 | transcript_product=putative heat shock protein 75 | location=TGGT1_chrIa:3979-11415(+) | protein_length=861 | sequence_SO=chromosome | SO=protein_coding	TGGT1_292920-t26_1-p1 [142-164]	0	2339.03	23
FALSE	High	VDISGVDVSSIKDEQFGASK	[K].VDISGVDVSSIKDEQFGASK.[K]					2.26449e-06	0	1	1	13	TGGT1_313390-t26_1-p1	transcript=TGGT1_313390-t26_1 | gene=TGGT1_313390 | organism=Toxoplasma_gondii_GT1 | gene_product=ribosomal protein RPL6 | transcript_product=ribosomal protein RPL6 | location=TGGT1_chrXI:3299999-3300967(+) | protein_length=322 | sequence_SO=chromosome | SO=protein_coding	TGGT1_313390-t26_1-p1 [227-246]	1	2081.04	20	0.616	0.613	-0.7	-0.71	0.325587	0.0161978	0.70645	0.20435	13.42	4.24	0.616	1.188	0.47	0.613	0.698	0.566	-0.7	0.25	-1.09	-0.71	-0.52	-0.82	140887	86850.7	1.64112e+06	1.14514e+06	84	49.31	101.19	93.24	140887
FALSE	High	SDAEVTDDNIYEEHTDRK	[R].SDAEVTDDNIYEEHTDRK.[V]	1xLabel:13C(6)15N(2) [K18]; 1xLabel:13C(6)15N(4) [R17]	1xLabel:13C(6)15N(2) [K18]; 1xLabel:13C(6)15N(4) [R17]			7.35332e-06	0	1	1	27	TGGT1_203310-t26_1-p1	transcript=TGGT1_203310-t26_1 | gene=TGGT1_203310 | organism=Toxoplasma_gondii_GT1 | gene_product=dense granule protein GRA7 | transcript_product=dense granule protein GRA7 | location=TGGT1_chrVIIa:2502941-2503651(+) | protein_length=236 | sequence_SO=chromosome | SO=protein_coding	TGGT1_203310-t26_1-p1 [107-124]	1	2154.95	18
FALSE	High	TFSDNGVPYDFVVLEK	[K].TFSDNGVPYDFVVLEK.[R]					1.70917e-05	0	1	1	1	TGGT1_249180-t26_1-p1	transcript=TGGT1_249180-t26_1 | gene=TGGT1_249180 | organism=Toxoplasma_gondii_GT1 | gene_product=bifunctional dihydrofolate reductase-thymidylate synthase | transcript_product=bifunctional dihydrofolate reductase-thymidylate synthase | location=TGGT1_chrXII:4294324-4300363(-) | protein_length=610 | sequence_SO=chromosome | SO=protein_coding	TGGT1_249180-t26_1-p1 [235-250]	0	1829.9	16
FALSE	High	KLSSYLQDIPLGFFQSR	[R].KLSSYLQDIPLGFFQSR.[A]	1xPhospho [S/Y]; 1xLabel:13C(6)15N(2) [K1]; 1xLabel:13C(6)15N(4) [R17]	1xPhospho [S3; S4; Y5]; 1xLabel:13C(6)15N(2) [K1]; 1xLabel:13C(6)15N(4) [R17]	TGGT1_258470-t26_1-p1 1xPhospho [S/Y]	TGGT1_258470-t26_1-p1 1xPhospho [S111; S112; Y113]	0.000184205	0	1	1	6	TGGT1_258470-t26_1-p1	transcript=TGGT1_258470-t26_1 | gene=TGGT1_258470 | organism=Toxoplasma_gondii_GT1 | gene_product=hypothetical protein | transcript_product=hypothetical protein | location=TGGT1_chrVIIb:3369823-3371292(+) | protein_length=284 | sequence_SO=chromosome | SO=protein_coding	TGGT1_258470-t26_1-p1 [109-125]	1	2097.05	17
FALSE	High	VDISGVDVSSIKDEQFGASK	[K].VDISGVDVSSIKDEQFGASK.[K]	1xLabel:13C(6)15N(2) [K]	1xLabel:13C(6)15N(2) [K12; K20]			5.50677e-05	0	1	1	7	TGGT1_313390-t26_1-p1	transcript=TGGT1_313390-t26_1 | gene=TGGT1_313390 | organism=Toxoplasma_gondii_GT1 | gene_product=ribosomal protein RPL6 | transcript_product=ribosomal protein RPL6 | location=TGGT1_chrXI:3299999-3300967(+) | protein_length=322 | sequence_SO=chromosome | SO=protein_coding	TGGT1_313390-t26_1-p1 [227-246]	1	2089.05	20
FALSE	High	SDAEVTDDNIYEEHTDRK	[R].SDAEVTDDNIYEEHTDRK.[V]					6.99205e-06	0	1	1	28	TGGT1_203310-t26_1-p1	transcript=TGGT1_203310-t26_1 | gene=TGGT1_203310 | organism=Toxoplasma_gondii_GT1 | gene_product=dense granule protein GRA7 | transcript_product=dense granule protein GRA7 | location=TGGT1_chrVIIa:2502941-2503651(+) | protein_length=236 | sequence_SO=chromosome | SO=protein_coding	TGGT1_203310-t26_1-p1 [107-124]	1	2136.93	18	0.857	0.9	-0.22	-0.15	0.331092	0.245606	0.70825	0.544258	9.46	8.65	0.783	0.857	1.059	0.835	0.9	1.012	-0.35	-0.22	0.08	-0.26	-0.15	0.02	1.22396e+06	958343	5.64115e+06	5.71106e+06	33.83	24.23	64.83	63.54	1.22396e+06
FALSE	High	SDAEVTDDNIYEEHTDR	[R].SDAEVTDDNIYEEHTDR.[K]	1xLabel:13C(6)15N(4) [R17]	1xLabel:13C(6)15N(4) [R17]			1.65428e-07	0	1	1	27	TGGT1_203310-t26_1-p1	transcript=TGGT1_203310-t26_1 | gene=TGGT1_203310 | organism=Toxoplasma_gondii_GT1 | gene_product=dense granule protein GRA7 | transcript_product=dense granule protein GRA7 | location=TGGT1_chrVIIa:2502941-2503651(+) | protein_length=236 | sequence_SO=chromosome | SO=protein_coding	TGGT1_203310-t26_1-p1 [107-123]	0	2018.84	17
FALSE	High	VDISGVDVSSIKDEQFGASK	[K].VDISGVDVSSIKDEQFGASK.[K]	2xLabel:13C(6)15N(2) [K12; K20]	2xLabel:13C(6)15N(2) [K12; K20]			1.52307e-05	0	1	1	10	TGGT1_313390-t26_1-p1	transcript=TGGT1_313390-t26_1 | gene=TGGT1_313390 | organism=Toxoplasma_gondii_GT1 | gene_product=ribosomal protein RPL6 | transcript_product=ribosomal protein RPL6 | location=TGGT1_chrXI:3299999-3300967(+) | protein_length=322 | sequence_SO=chromosome | SO=protein_coding	TGGT1_313390-t26_1-p1 [227-246]	1	2097.07	20
FALSE	High	FGVSIPDEEASK	[K].FGVSIPDEEASK.[I]	1xLabel:13C(6)15N(2) [K12]	1xLabel:13C(6)15N(2) [K12]			0.000212077	0	1	1	8	TGGT1_264080-t26_1-p1	transcript=TGGT1_264080-t26_1 | gene=TGGT1_264080 | organism=Toxoplasma_gondii_GT1 | gene_product=acyl carrier protein ACP | transcript_product=acyl carrier protein ACP | location=TGGT1_chrVIIb:176277-177755(-) | protein_length=183 | sequence_SO=chromosome | SO=protein_coding	TGGT1_264080-t26_1-p1 [153-164]	0	1286.64	12
FALSE	High	SDAEVTDDNIYEEHTDR	[R].SDAEVTDDNIYEEHTDR.[K]					3.75505e-07	0	1	1	28	TGGT1_203310-t26_1-p1	transcript=TGGT1_203310-t26_1 | gene=TGGT1_203310 | organism=Toxoplasma_gondii_GT1 | gene_product=dense granule protein GRA7 | transcript_product=dense granule protein GRA7 | location=TGGT1_chrVIIa:2502941-2503651(+) | protein_length=236 | sequence_SO=chromosome | SO=protein_coding	TGGT1_203310-t26_1-p1 [107-123]	0	2008.84	17	0.955	1.022	-0.07	0.03	0.682679	0.525112	0.868274	0.667047	4.64	17.53	0.922	0.955	1.067	0.901	1.676	1.022	-0.12	-0.07	0.09	-0.15	0.75	0.03	1.4386e+06	1.37377e+06	4.27245e+06	4.36545e+06	3.82	11.44	34.2	63.61	1.3793e+06
FALSE	High	FGLTSEDVESAVIYNHK	[K].FGLTSEDVESAVIYNHK.[E]					6.84182e-07	0	1	1	11	TGGT1_215430-t26_1-p1	transcript=TGGT1_215430-t26_1 | gene=TGGT1_215430 | organism=Toxoplasma_gondii_GT1 | gene_product=hypothetical protein | transcript_product=hypothetical protein | location=TGGT1_chrX:6843523-6847906(-) | protein_length=244 | sequence_SO=chromosome | SO=protein_coding	TGGT1_215430-t26_1-p1 [199-215]	0	1908.93	17
FALSE	High	SAYPHHPTEDSTGGGGSPSHTR	[R].SAYPHHPTEDSTGGGGSPSHTR.[D]					1.66923e-05	0	1	1	7	TGGT1_247520-t26_1-p1	transcript=TGGT1_247520-t26_1 | gene=TGGT1_247520 | organism=Toxoplasma_gondii_GT1 | gene_product=hypothetical protein | transcript_product=hypothetical protein | location=TGGT1_chrXII:3323216-3323986(-) | protein_length=256 | sequence_SO=chromosome | SO=protein_coding	TGGT1_247520-t26_1-p1 [228-249]	0	2234.98	22	0.876	0.886	-0.19	-0.17	0.806151	0.189067	0.924318	0.504568	57.1	10.16	0.436	4.747	0.876	0.964	0.739	0.886	-1.2	2.25	-0.19	-0.05	-0.44	-0.17	91323	54634.6	486164	397512	81.52	40.87	112.36	114.68	125354
FALSE	High	LWNVDEAEAAEIK	[R].LWNVDEAEAAEIK.[N]	1xLabel:13C(6)15N(2) [K13]	1xLabel:13C(6)15N(2) [K13]			0.000156164	0	1	1	1	TGGT1_249990-t26_1-p1	transcript=TGGT1_249990-t26_1 | gene=TGGT1_249990 | organism=Toxoplasma_gondii_GT1 | gene_product=hypothetical protein | transcript_product=hypothetical protein | location=TGGT1_chrXII:4909167-4913985(-) | protein_length=838 | sequence_SO=chromosome | SO=protein_coding	TGGT1_249990-t26_1-p1 [130-142]	0	1495.75	13
FALSE	High	KNIVPFGLDAADGDPSLSATTVR	[R].KNIVPFGLDAADGDPSLSATTVR.[S]					1.61107e-05	0	1	1	3	TGGT1_294670-t26_1-p1	transcript=TGGT1_294670-t26_1 | gene=TGGT1_294670 | organism=Toxoplasma_gondii_GT1 | gene_product=translation initiation factor 3 subunit | transcript_product=translation initiation factor 3 subunit | location=TGGT1_chrIa:1039815-1044413(-) | protein_length=277 | sequence_SO=chromosome | SO=protein_coding	TGGT1_294670-t26_1-p1 [75-97]	1	2344.21	23
FALSE	High	KNIVPFGLDAADGDPSLSATTVR	[R].KNIVPFGLDAADGDPSLSATTVR.[S]	1xLabel:13C(6)15N(2) [K1]; 1xLabel:13C(6)15N(4) [R23]	1xLabel:13C(6)15N(2) [K1]; 1xLabel:13C(6)15N(4) [R23]			4.03427e-05	0	1	1	5	TGGT1_294670-t26_1-p1	transcript=TGGT1_294670-t26_1 | gene=TGGT1_294670 | organism=Toxoplasma_gondii_GT1 | gene_product=translation initiation factor 3 subunit | transcript_product=translation initiation factor 3 subunit | location=TGGT1_chrIa:1039815-1044413(-) | protein_length=277 | sequence_SO=chromosome | SO=protein_coding	TGGT1_294670-t26_1-p1 [75-97]	1	2362.24	23	0.322	0.678	-1.63	-0.56	0.399999	0.885797	0.740307	0.922389	11.55	67.25	0.322	1.998	0.081	83.785	0.678	0.01	-1.63	1	-3.63	6.39	-0.56	-6.64	6732.91	12665.3	749814	480902	154.06	66.61	86.55	85.69	6732.91
FALSE	High	FGCSSITPELISR	[K].FGCSSITPELISR.[I]					8.73405e-05	0	1	1	1	TGGT1_288360-t26_1-p1	transcript=TGGT1_288360-t26_1 | gene=TGGT1_288360 | organism=Toxoplasma_gondii_GT1 | gene_product=tryptophanyl-tRNA synthetase (TrpRS2) | transcript_product=tryptophanyl-tRNA synthetase (TrpRS2) | location=TGGT1_chrIX:2284649-2289081(+) | protein_length=689 | sequence_SO=chromosome | SO=protein_coding	TGGT1_288360-t26_1-p1 [305-317]	0	1409.71	13
FALSE	High	LWVGTICKPEENPNTNR	[K].LWVGTICKPEENPNTNR.[L]					8.66032e-05	0	1	1	3	TGGT1_211030-t26_1-p1	transcript=TGGT1_211030-t26_1 | gene=TGGT1_211030 | organism=Toxoplasma_gondii_GT1 | gene_product=hypothetical protein | transcript_product=hypothetical protein | location=TGGT1_chrIV:1889471-1891938(-) | protein_length=191 | sequence_SO=chromosome | SO=protein_coding	TGGT1_211030-t26_1-p1 [80-96]	0	1970.98	17	0.939	0.485	-0.09	-1.04	0.921253	0.131201	0.969025	0.442234	31.66	3.46	1.625	0.939	0.711	0.485	0.13	0.533	0.7	-0.09	-0.49	-1.04	-2.95	-0.91	10015.3	10758.8	11891	3988.54	18.51	28.05	169.26	171.16	7864.41
FALSE	High	FGALLASGLIDAGGR	[R].FGALLASGLIDAGGR.[N]					1.55492e-05	0	1	1	2	TGGT1_263060-t26_1-p1	transcript=TGGT1_263060-t26_1 | gene=TGGT1_263060 | organism=Toxoplasma_gondii_GT1 | gene_product=Proteasome/cyclosome repeat-containing protein | transcript_product=Proteasome/cyclosome repeat-containing protein | location=TGGT1_chrVIIb:808221-820240(-) | protein_length=988 | sequence_SO=chromosome | SO=protein_coding	TGGT1_263060-t26_1-p1 [665-679]	0	1417.78	15	1.37	0.679	0.45	-0.56	0.816003	0.0175843	0.928482	0.20435	5.93	4.82	1.424	1.37	0.357	0.752	0.631	0.679	0.51	0.45	-1.49	-0.41	-0.66	-0.56	6634.53	7119.88	343991	243835	31.79	70.61	57.33	56.44	4998.59
FALSE	High	FFVGGIIPQATELQIR	[K].FFVGGIIPQATELQIR.[S]	1xLabel:13C(6)15N(4) [R16]	1xLabel:13C(6)15N(4) [R16]			6.73885e-05	0	1	1	1	TGGT1_265530-t26_1-p1	transcript=TGGT1_265530-t26_1 | gene=TGGT1_265530 | organism=Toxoplasma_gondii_GT1 | gene_product=RNA recognition motif-containing protein | transcript_product=RNA recognition motif-containing protein | location=TGGT1_chrIX:1315868-1318933(-) | protein_length=492 | sequence_SO=chromosome | SO=protein_coding	TGGT1_265530-t26_1-p1 [111-126]	0	1799.01	16
FALSE	High	VDVPYQVQEAPGRPTTLQLR	[K].VDVPYQVQEAPGRPTTLQLR.[D]					0.000170185	0	1	1	11	TGGT1_219310-t26_1-p1	transcript=TGGT1_219310-t26_1 | gene=TGGT1_219310 | organism=Toxoplasma_gondii_GT1 | gene_product=DnaK family protein | transcript_product=DnaK family protein | location=TGGT1_chrXII:915528-922343(+) | protein_length=818 | sequence_SO=chromosome | SO=protein_coding	TGGT1_219310-t26_1-p1 [562-581]	0	2267.21	20
FALSE	High	TFIIVVTNPLDCMVK	[K].TFIIVVTNPLDCMVK.[V]	1xOxidation [M13]; 1xLabel:13C(6)15N(2) [K15]	1xOxidation [M13]; 1xLabel:13C(6)15N(2) [K15]			1.49188e-05	0	1	1	5	TGGT1_232350-t26_1-p1	transcript=TGGT1_232350-t26_1 | gene=TGGT1_232350 | organism=Toxoplasma_gondii_GT1 | gene_product=lactate dehydrogenase LDH1 | transcript_product=lactate dehydrogenase LDH1 | location=TGGT1_chrVIII:2023599-2025126(+) | protein_length=329 | sequence_SO=chromosome | SO=protein_coding	TGGT1_232350-t26_1-p1 [126-140]	0	1716.92	15	0.779	0.902	-0.36	-0.15	0.946862	0.00594802	0.979548	0.197599	19.8	0.42	0.608	0.779	1.95	0.902	0.881	0.905	-0.72	-0.36	0.96	-0.15	-0.18	-0.14	11188.3	6798.44	687224	605392	70.75	51.68	81.94	82.85	11188.3
FALSE	High	SAVEEVEAGEAPTLIPATSVHQTAAK	[R].SAVEEVEAGEAPTLIPATSVHQTAAK.[Q]					0.000135962	0	1	1	1	TGGT1_285850-t26_1-p1	transcript=TGGT1_285850-t26_1 | gene=TGGT1_285850 | organism=Toxoplasma_gondii_GT1 | gene_product=peptidyl-prolyl cis-trans isomerase, FKBP-type domain-containing protein | transcript_product=peptidyl-prolyl cis-trans isomerase, FKBP-type domain-containing protein | location=TGGT1_chrV:2026917-2028990(-) | protein_length=428 | sequence_SO=chromosome | SO=protein_coding	TGGT1_285850-t26_1-p1 [146-171]	0	2606.33	26
FALSE	High	TFIIVVTNPLDCMVK	[K].TFIIVVTNPLDCMVK.[V]	1xOxidation [M13]	1xOxidation [M13]			9.77385e-05	0	1	1	5	TGGT1_232350-t26_1-p1	transcript=TGGT1_232350-t26_1 | gene=TGGT1_232350 | organism=Toxoplasma_gondii_GT1 | gene_product=lactate dehydrogenase LDH1 | transcript_product=lactate dehydrogenase LDH1 | location=TGGT1_chrVIII:2023599-2025126(+) | protein_length=329 | sequence_SO=chromosome | SO=protein_coding	TGGT1_232350-t26_1-p1 [126-140]	0	1708.9	15
FALSE	High	KNVFSEGAPEEASDQVMAPPVR	[R].KNVFSEGAPEEASDQVMAPPVR.[S]	1xLabel:13C(6)15N(2) [K1]; 1xLabel:13C(6)15N(4) [R22]	1xLabel:13C(6)15N(2) [K1]; 1xLabel:13C(6)15N(4) [R22]			0.000212077	0	1	1	1	TGGT1_253820-t26_1-p1	transcript=TGGT1_253820-t26_1 | gene=TGGT1_253820 | organism=Toxoplasma_gondii_GT1 | gene_product=hypothetical protein | transcript_product=hypothetical protein | location=TGGT1_chrIII:1203300-1205132(+) | protein_length=226 | sequence_SO=chromosome | SO=protein_coding	TGGT1_253820-t26_1-p1 [33-54]	1	2376.16	22
FALSE	High	VDVPYQVQEAPGRPTTLQLR	[K].VDVPYQVQEAPGRPTTLQLR.[D]	2xLabel:13C(6)15N(4) [R13; R20]	2xLabel:13C(6)15N(4) [R13; R20]			0.000180967	0	1	1	8	TGGT1_219310-t26_1-p1	transcript=TGGT1_219310-t26_1 | gene=TGGT1_219310 | organism=Toxoplasma_gondii_GT1 | gene_product=DnaK family protein | transcript_product=DnaK family protein | location=TGGT1_chrXII:915528-922343(+) | protein_length=818 | sequence_SO=chromosome | SO=protein_coding	TGGT1_219310-t26_1-p1 [562-581]	0	2287.23	20	0.753	0.82	-0.41	-0.29	0.374483	0.0871795	0.730068	0.353359	32.12	0.88	0.753	0.065	1.041	0.82	0.827	0.629	-0.41	-3.94	0.06	-0.29	-0.27	-0.67	33816.8	35187	985041	814550	37.9	82.18	103.88	89.38	59976.9
FALSE	High	TFIIVVTNPLDCMVK	[K].TFIIVVTNPLDCMVK.[V]	1xLabel:13C(6)15N(2) [K15]	1xLabel:13C(6)15N(2) [K15]			3.41472e-05	0	1	1	5	TGGT1_232350-t26_1-p1	transcript=TGGT1_232350-t26_1 | gene=TGGT1_232350 | organism=Toxoplasma_gondii_GT1 | gene_product=lactate dehydrogenase LDH1 | transcript_product=lactate dehydrogenase LDH1 | location=TGGT1_chrVIII:2023599-2025126(+) | protein_length=329 | sequence_SO=chromosome | SO=protein_coding	TGGT1_232350-t26_1-p1 [126-140]	0	1700.92	15
FALSE	High	LYASSGLTAINDDPSLGCK	[K].LYASSGLTAINDDPSLGCK.[A]					5.83256e-08	0	1	1	2	TGGT1_214940-t26_1-p1	transcript=TGGT1_214940-t26_1 | gene=TGGT1_214940 | organism=Toxoplasma_gondii_GT1 | gene_product=MIC2-associated protein M2AP | transcript_product=MIC2-associated protein M2AP | location=TGGT1_chrX:6494811-6496996(+) | protein_length=330 | sequence_SO=chromosome | SO=protein_coding	TGGT1_214940-t26_1-p1 [209-227]	0	1924.93	19	1.161	0.92	0.22	-0.12	0.796312	0.845871	0.920078	0.893625	78.68	28.19	1.161	0.545	2.274	0.713	1.349	0.92	0.22	-0.88	1.19	-0.49	0.43	-0.12	5876.45	6824.89	13072.2	9319.88	4.04	69.15	171.63	171.63	5876.45
FALSE	High	VDVTVSQSPAGPHSPLSASPQTGTAASLK	[R].VDVTVSQSPAGPHSPLSASPQTGTAASLK.[L]					3.41728e-08	0	1	1	8	TGGT1_216000-t26_1-p1	transcript=TGGT1_216000-t26_1 | gene=TGGT1_216000 | organism=Toxoplasma_gondii_GT1 | gene_product=alveolin domain containing intermediate filament IMC3 | transcript_product=alveolin domain containing intermediate filament IMC3 | location=TGGT1_chrXI:6395592-6397208(+) | protein_length=538 | sequence_SO=chromosome | SO=protein_coding	TGGT1_216000-t26_1-p1 [325-353]	0	2790.43	29
FALSE	High	FGDMISQGVIDPAK	[K].FGDMISQGVIDPAK.[V]					5.16663e-05	0	1	1	2	TGGT1_240600-t26_1-p1	transcript=TGGT1_240600-t26_1 | gene=TGGT1_240600 | organism=Toxoplasma_gondii_GT1 | gene_product=putative chaperonin cpn60 | transcript_product=putative chaperonin cpn60 | location=TGGT1_chrVI:1306402-1309981(+) | protein_length=667 | sequence_SO=chromosome | SO=protein_coding	TGGT1_240600-t26_1-p1 [612-625]	0	1477.74	14	1.497	0.718	0.58	-0.48	0.354251	0.601805	0.722063	0.718135	63.54	20.39	4.585	0.856	1.497	27.377	0.718	0.526	2.2	-0.22	0.58	4.77	-0.48	-0.93	9173.78	9941.58	500670	359435	74.47	42.8	135.99	99.93	1186.41
FALSE	High	FGDMISQGVIDPAK	[K].FGDMISQGVIDPAK.[V]	1xLabel:13C(6)15N(2) [K14]	1xLabel:13C(6)15N(2) [K14]			4.10555e-05	0	1	1	4	TGGT1_240600-t26_1-p1	transcript=TGGT1_240600-t26_1 | gene=TGGT1_240600 | organism=Toxoplasma_gondii_GT1 | gene_product=putative chaperonin cpn60 | transcript_product=putative chaperonin cpn60 | location=TGGT1_chrVI:1306402-1309981(+) | protein_length=667 | sequence_SO=chromosome | SO=protein_coding	TGGT1_240600-t26_1-p1 [612-625]	0	1485.75	14
FALSE	High	KNLKPEIPPFENYYDKL	[R].KNLKPEIPPFENYYDKL.[-]	3xLabel:13C(6)15N(2) [K1; K4; K16]	3xLabel:13C(6)15N(2) [K1; K4; K16]			0.00016327	0	1	1	2	TGGT1_205470-t26_1-p1	transcript=TGGT1_205470-t26_1 | gene=TGGT1_205470 | organism=Toxoplasma_gondii_GT1 | gene_product=putative translation elongation factor 2 family protein | transcript_product=putative translation elongation factor 2 family protein | location=TGGT1_chrVIIa:1297616-1301283(+) | protein_length=832 | sequence_SO=chromosome | SO=protein_coding	TGGT1_205470-t26_1-p1 [816-832]	2	2132.15	17	1.365	63.558	0.45	5.99	0.153198	0.192245	0.597663	0.50747	19.29	85.01	1.187	2.219	1.365	63.558	100	0.988	0.25	1.15	0.45	5.99	6.64	-0.02	4429.5	8658.82	7059.31	561423	46.18	38.34	35.62	94.99	4429.5
FALSE	High	VDTIGLVFHPPNMFINVK	[K].VDTIGLVFHPPNMFINVK.[L]	1xLabel:13C(6)15N(2) [K18]	1xLabel:13C(6)15N(2) [K18]			0.00011356	0	1	1	1	TGGT1_216650-t26_1-p1	transcript=TGGT1_216650-t26_1 | gene=TGGT1_216650 | organism=Toxoplasma_gondii_GT1 | gene_product=S15 sporozoite-expressed protein | transcript_product=S15 sporozoite-expressed protein | location=TGGT1_chrXI:5902644-5904672(-) | protein_length=400 | sequence_SO=chromosome | SO=protein_coding	TGGT1_216650-t26_1-p1 [242-259]	0	2049.11	18
FALSE	High	TFLNPQMMQASLQMQQAMQNMQR	[R].TFLNPQMMQASLQMQQAMQNMQR.[A]	1xLabel:13C(6)15N(4) [R23]	1xLabel:13C(6)15N(4) [R23]			4.46447e-08	0	1	1	1	TGGT1_223680-t26_1-p1	transcript=TGGT1_223680-t26_1 | gene=TGGT1_223680 | organism=Toxoplasma_gondii_GT1 | gene_product=ubiquitin family protein | transcript_product=ubiquitin family protein | location=TGGT1_chrX:3562244-3565671(-) | protein_length=399 | sequence_SO=chromosome | SO=protein_coding	TGGT1_223680-t26_1-p1 [223-245]	0	2765.27	23
FALSE	High	FGLFGEAADTLLK	[R].FGLFGEAADTLLK.[S]					4.68074e-05	0	1	1	6	TGGT1_290950-t26_1-p1	transcript=TGGT1_290950-t26_1 | gene=TGGT1_290950 | organism=Toxoplasma_gondii_GT1 | gene_product=putative clathrin heavy chain | transcript_product=putative clathrin heavy chain | location=TGGT1_chrIX:3770246-3782423(-) | protein_length=1731 | sequence_SO=chromosome | SO=protein_coding	TGGT1_290950-t26_1-p1 [1107-1119]	0	1381.74	13	4.362	0.65	2.12	-0.62	0.285673	0.0103586	0.694079	0.199491	124.33	1.72	4.362	0.704	13.346	0.65	0.572	0.668	2.12	-0.51	3.74	-0.62	-0.81	-0.58	4399.03	19188.2	641663	417154	52.3	64.47	82.34	87.22	4399.03
FALSE	High	FGIDVVFTPTTHEIIR	[K].FGIDVVFTPTTHEIIR.[G]					4.65792e-06	0	1	1	1	TGGT1_205510-t26_1-p1	transcript=TGGT1_205510-t26_1 | gene=TGGT1_205510 | organism=Toxoplasma_gondii_GT1 | gene_product=putative nucleolar protein 5 | transcript_product=putative nucleolar protein 5 | location=TGGT1_chrVIIa:1272709-1276843(-) | protein_length=490 | sequence_SO=chromosome | SO=protein_coding	TGGT1_205510-t26_1-p1 [106-121]	0	1844.99	16	0.217	0.189	-2.2	-2.41	0.225593	0.144466	0.657737	0.462604	5.36	0.63	0.051	1.016	0.217	0.189	0.166	0.837	-4.29	0.02	-2.2	-2.41	-2.59	-0.26	44518.6	10623	57327.4	10813.4	59.08	62.5	156.48	169.43	44518.6
FALSE	High	VDTDPEALGPLPEK	[R].VDTDPEALGPLPEK.[Q]					4.65792e-06	0	1	1	14	TGGT1_230160-t26_1-p1	transcript=TGGT1_230160-t26_1 | gene=TGGT1_230160 | organism=Toxoplasma_gondii_GT1 | gene_product=hypothetical protein | transcript_product=hypothetical protein | location=TGGT1_chrVIII:647435-648305(-) | protein_length=142 | sequence_SO=chromosome | SO=protein_coding	TGGT1_230160-t26_1-p1 [120-133]	0	1480.75	14	34.211	100	5.1	6.64	0.00617469	0.418828	0.232219	0.617555	22.01	0	16.771	39.291	34.211	100	100	0.082	4.07	5.3	5.1	6.64	6.64	-3.62	8303.04	175902	11359.6	1.33813e+06	49.03	39.17	172.43	50.94	10488.7
FALSE	High	KNDGTISTEELAQVMK	[R].KNDGTISTEELAQVMK.[T]					5.78437e-05	0	1	1	5	TGGT1_305050-t26_1-p1	transcript=TGGT1_305050-t26_1 | gene=TGGT1_305050 | organism=Toxoplasma_gondii_GT1 | gene_product=putative calmodulin | transcript_product=putative calmodulin | location=TGGT1_chrIX:4983149-4983550(+) | protein_length=133 | sequence_SO=chromosome | SO=protein_coding	TGGT1_305050-t26_1-p1 [82-97]	1	1763.88	16
FALSE	High	SLLVAAFAPTFIVGKPR	[K].SLLVAAFAPTFIVGKPR.[V]	1xLabel:13C(6)15N(2) [K15]; 1xLabel:13C(6)15N(4) [R17]	1xLabel:13C(6)15N(2) [K15]; 1xLabel:13C(6)15N(4) [R17]			8.46651e-05	0	1	1	1	TGGT1_318440-t26_1-p1	transcript=TGGT1_318440-t26_1 | gene=TGGT1_318440 | organism=Toxoplasma_gondii_GT1 | gene_product=helicase associated domain (ha2) protein | transcript_product=helicase associated domain (ha2) protein | location=TGGT1_chrIV:1264045-1277404(-) | protein_length=2234 | sequence_SO=chromosome | SO=protein_coding	TGGT1_318440-t26_1-p1 [1174-1190]	0	1805.08	17
FALSE	High	VDTHPSNIILLTCDAFGVLPPLSK	[K].VDTHPSNIILLTCDAFGVLPPLSK.[L]					1.6991e-05	0	1	1	1	TGGT1_289650-t26_1-p1	transcript=TGGT1_289650-t26_1 | gene=TGGT1_289650 | organism=Toxoplasma_gondii_GT1 | gene_product=PEP-carboxykinase I | transcript_product=PEP-carboxykinase I | location=TGGT1_chrIX:3173228-3176423(+) | protein_length=677 | sequence_SO=chromosome | SO=protein_coding	TGGT1_289650-t26_1-p1 [482-505]	0	2550.36	24
FALSE	High	FHVEALAELLESDAK	[K].FHVEALAELLESDAK.[F]					0.000178681	0	1	1	1	TGGT1_304710-t26_1-p1	transcript=TGGT1_304710-t26_1 | gene=TGGT1_304710 | organism=Toxoplasma_gondii_GT1 | gene_product=putative eukaryotic peptide chain release factor | transcript_product=putative eukaryotic peptide chain release factor | location=TGGT1_chrVIIa:615815-622350(-) | protein_length=814 | sequence_SO=chromosome | SO=protein_coding	TGGT1_304710-t26_1-p1 [514-528]	0	1671.86	15	0.861	0.416	-0.22	-1.27	0.420497	0.0843693	0.750364	0.34704	35.72	10.91	0.861	0.068	1.141	0.416	0.239	0.64	-0.22	-3.88	0.19	-1.27	-2.07	-0.64	12435.1	8026.33	12830.4	5325.35	29.75	77.92	156.6	164.44	12435.1
FALSE	High	FGFAPDSVELFAER	[R].FGFAPDSVELFAER.[V]	1xLabel:13C(6)15N(4) [R14]	1xLabel:13C(6)15N(4) [R14]			1.33725e-05	0	1	1	6	TGGT1_232300-t26_1-p1	transcript=TGGT1_232300-t26_1 | gene=TGGT1_232300 | organism=Toxoplasma_gondii_GT1 | gene_product=ribosomal protein RPS3 | transcript_product=ribosomal protein RPS3 | location=TGGT1_chrVIII:1993673-1994649(-) | protein_length=255 | sequence_SO=chromosome | SO=protein_coding	TGGT1_232300-t26_1-p1 [99-112]	0	1594.78	14
FALSE	High	FGEWAVVTGATDGIGK	[K].FGEWAVVTGATDGIGK.[A]	1xLabel:13C(6)15N(2) [K16]	1xLabel:13C(6)15N(2) [K16]			2.5083e-05	0	1	1	2	TGGT1_271888-t26_1-p1	transcript=TGGT1_271888-t26_1 | gene=TGGT1_271888 | organism=Toxoplasma_gondii_GT1 | gene_product=putative 3-ketoacyl-CoA reductase | transcript_product=putative 3-ketoacyl-CoA reductase | location=TGGT1_chrVIII:4294988-4299861(-) | protein_length=342 | sequence_SO=chromosome | SO=protein_coding	TGGT1_271888-t26_1-p1 [63-78]	0	1615.82	16
FALSE	High	LPLPANIEAASSGFESVDQVFR	[K].LPLPANIEAASSGFESVDQVFR.[F]	1xLabel:13C(6)15N(4) [R22]	1xLabel:13C(6)15N(4) [R22]			7.08015e-09	0	2	2	8	TGGT1_277270-t26_1-p1; TGGT1_360830-t26_1-p1	transcript=TGGT1_277270-t26_1 | gene=TGGT1_277270 | organism=Toxoplasma_gondii_GT1 | gene_product=NTPase II | transcript_product=NTPase II | location=AAQM03000418:1-4939(+) | protein_length=862 | sequence_SO=contig | SO=protein_coding transcript=TGGT1_360830-t26_1 | gene=TGGT1_360830 | organism=Toxoplasma_gondii_GT1 | gene_product=nucleoside-triphosphatase | transcript_product=nucleoside-triphosp…	TGGT1_277270-t26_1-p1 [322-343]; TGGT1_360830-t26_1-p1 [200-221]	0	2357.2	22
FALSE	High	KNLKPEIPPFENYYDKL	[R].KNLKPEIPPFENYYDKL.[-]					2.01686e-06	0	1	1	6	TGGT1_205470-t26_1-p1	transcript=TGGT1_205470-t26_1 | gene=TGGT1_205470 | organism=Toxoplasma_gondii_GT1 | gene_product=putative translation elongation factor 2 family protein | transcript_product=putative translation elongation factor 2 family protein | location=TGGT1_chrVIIa:1297616-1301283(+) | protein_length=832 | sequence_SO=chromosome | SO=protein_coding	TGGT1_205470-t26_1-p1 [816-832]	2	2108.11	17
FALSE	High	FGEDVFFGHVQDPALVNHLR	[R].FGEDVFFGHVQDPALVNHLR.[E]	1xLabel:13C(6)15N(4) [R20]	1xLabel:13C(6)15N(4) [R20]			3.61011e-05	0	1	1	2	TGGT1_224060-t26_1-p1	transcript=TGGT1_224060-t26_1 | gene=TGGT1_224060 | organism=Toxoplasma_gondii_GT1 | gene_product=putative thioredoxin | transcript_product=putative thioredoxin | location=TGGT1_chrX:3262854-3264722(-) | protein_length=622 | sequence_SO=chromosome | SO=protein_coding	TGGT1_224060-t26_1-p1 [241-260]	0	2307.15	20
FALSE	High	FGEDVFFGHVQDPALVNHLR	[R].FGEDVFFGHVQDPALVNHLR.[E]					7.07557e-05	0	1	1	2	TGGT1_224060-t26_1-p1	transcript=TGGT1_224060-t26_1 | gene=TGGT1_224060 | organism=Toxoplasma_gondii_GT1 | gene_product=putative thioredoxin | transcript_product=putative thioredoxin | location=TGGT1_chrX:3262854-3264722(-) | protein_length=622 | sequence_SO=chromosome | SO=protein_coding	TGGT1_224060-t26_1-p1 [241-260]	0	2297.15	20	1.398	0.759	0.48	-0.4	0.286184	0.739573	0.694079	0.815147	17.08	31.85	8.358	1.398	1.237	0.476	1.781	0.759	3.06	0.48	0.31	-1.07	0.83	-0.4	914.4	7011.96	4911.45	8746.4	122.11	75.36	171.32	170.36	914.4
FALSE	High	FGEAFEMIPR	[K].FGEAFEMIPR.[L]	1xLabel:13C(6)15N(4) [R10]	1xLabel:13C(6)15N(4) [R10]			0.000104798	0	1	1	6	TGGT1_287500-t26_1-p1	transcript=TGGT1_287500-t26_1 | gene=TGGT1_287500 | organism=Toxoplasma_gondii_GT1 | gene_product=putative T complex chaperonin | transcript_product=putative T complex chaperonin | location=TGGT1_chrV:438209-443517(-) | protein_length=556 | sequence_SO=chromosome | SO=protein_coding	TGGT1_287500-t26_1-p1 [439-448]	0	1206.59	10	0.01	0.695	-6.64	-0.53	0.065196	0.00267621	0.444416	0.197599	0	0.21	0.01	0.138	0.01	0.693	0.732	0.695	-6.64	-2.86	-6.64	-0.53	-0.45	-0.53	802794	5402.7	696579	482573	101.16	11.06	62.18	60.6	802794
FALSE	High	FGEAFEMIPR	[K].FGEAFEMIPR.[L]					0.000137435	0	1	1	6	TGGT1_287500-t26_1-p1	transcript=TGGT1_287500-t26_1 | gene=TGGT1_287500 | organism=Toxoplasma_gondii_GT1 | gene_product=putative T complex chaperonin | transcript_product=putative T complex chaperonin | location=TGGT1_chrV:438209-443517(-) | protein_length=556 | sequence_SO=chromosome | SO=protein_coding	TGGT1_287500-t26_1-p1 [439-448]	0	1196.58	10
FALSE	High	FGFAPDSVELFAER	[R].FGFAPDSVELFAER.[V]					5.7496e-06	0	1	1	7	TGGT1_232300-t26_1-p1	transcript=TGGT1_232300-t26_1 | gene=TGGT1_232300 | organism=Toxoplasma_gondii_GT1 | gene_product=ribosomal protein RPS3 | transcript_product=ribosomal protein RPS3 | location=TGGT1_chrVIII:1993673-1994649(-) | protein_length=255 | sequence_SO=chromosome | SO=protein_coding	TGGT1_232300-t26_1-p1 [99-112]	0	1584.77	14	23.677	0.924	4.57	-0.11	0.0149005	0.784322	0.265017	0.849172	49.49	14.92	23.677	15.774	63.739	0.815	0.924	1.616	4.57	3.98	5.99	-0.29	-0.11	0.69	9650.24	197147	2346951	1.91355e+06	52.24	16.12	62.6	99.08	9650.24
FALSE	High	VDIGQILMSIR	[R].VDIGQILMSIR.[T]	1xOxidation [M8]	1xOxidation [M8]			0.000140798	0	1	1	4	TGGT1_288720-t26_1-p1	transcript=TGGT1_288720-t26_1 | gene=TGGT1_288720 | organism=Toxoplasma_gondii_GT1 | gene_product=ribosomal protein RPL10 | transcript_product=ribosomal protein RPL10 | location=TGGT1_chrIX:2518172-2520490(-) | protein_length=221 | sequence_SO=chromosome | SO=protein_coding	TGGT1_288720-t26_1-p1 [129-139]	0	1260.7	11
FALSE	High	FKPAYNPYTEPSMEIFGYHAGLK	[K].FKPAYNPYTEPSMEIFGYHAGLK.[R]	2xLabel:13C(6)15N(2) [K2; K23]	2xLabel:13C(6)15N(2) [K2; K23]			0.00011356	0	1	1	1	TGGT1_234505-t26_1-p1	transcript=TGGT1_234505-t26_1 | gene=TGGT1_234505 | organism=Toxoplasma_gondii_GT1 | gene_product=putative phenylalanyl-tRNA synthetase alpha chain A | transcript_product=putative phenylalanyl-tRNA synthetase alpha chain A | location=TGGT1_chrX:4319172-4323950(+) | protein_length=525 | sequence_SO=chromosome | SO=protein_coding	TGGT1_234505-t26_1-p1 [443-465]	0	2676.31	23	0.577	0.74	-0.79	-0.43	0.0394015	0.971276	0.36223	0.980237	6.55	18.94	0.43	0.654	0.577	0.568	2.261	0.74	-1.22	-0.61	-0.79	-0.82	1.18	-0.43	12845.4	5529.4	13206.2	14011.5	33.4	27.7	165.54	161.9	12845.4
FALSE	High	KLPPDVQVALFSATMPQDILELTTK	[K].KLPPDVQVALFSATMPQDILELTTK.[F]	2xLabel:13C(6)15N(2) [K1; K25]	2xLabel:13C(6)15N(2) [K1; K25]			5.5575e-07	0	1	1	1	TGGT1_250770-t26_1-p1	transcript=TGGT1_250770-t26_1 | gene=TGGT1_250770 | organism=Toxoplasma_gondii_GT1 | gene_product=putative eukaryotic initiation factor-4A | transcript_product=putative eukaryotic initiation factor-4A | location=TGGT1_chrXII:5123731-5125767(-) | protein_length=412 | sequence_SO=chromosome | SO=protein_coding	TGGT1_250770-t26_1-p1 [208-232]	1	2771.52	25	9.572	0.37	3.26	-1.44	0.650684	0.528805	0.855027	0.668735	12.01	19.73	0.109	9.572	10.347	0.01	0.37	6.224	-3.2	3.26	3.37	-6.64	-1.44	2.64	1243.63	10778.2	4749.02	2325.12	129.18	73.67	171.74	70.17	11196.4
FALSE	High	FLGQGSAYYAPAASAVAMATSFLNDEKR	[R].FLGQGSAYYAPAASAVAMATSFLNDEKR.[V]					0.000111695	0	1	1	3	TGGT1_232350-t26_1-p1	transcript=TGGT1_232350-t26_1 | gene=TGGT1_232350 | organism=Toxoplasma_gondii_GT1 | gene_product=lactate dehydrogenase LDH1 | transcript_product=lactate dehydrogenase LDH1 | location=TGGT1_chrVIII:2023599-2025126(+) | protein_length=329 | sequence_SO=chromosome | SO=protein_coding	TGGT1_232350-t26_1-p1 [237-264]	1	2936.42	28	1.741	0.942	0.8	-0.09	0.739694	0.11319	0.894637	0.411533	6.97	0.24	0.108	1.823	1.741	0.942	0.851	0.944	-3.21	0.87	0.8	-0.09	-0.23	-0.08	7535.47	4942.48	3.79235e+06	3280954	68.19	93.87	83.88	86.97	13786.9
FALSE	High	TFSYAGFEQQPK	[K].TFSYAGFEQQPK.[R]	1xLabel:13C(6)15N(2) [K12]	1xLabel:13C(6)15N(2) [K12]			0.000208513	0	1	1	4	TGGT1_297500-t26_1-p1	transcript=TGGT1_297500-t26_1 | gene=TGGT1_297500 | organism=Toxoplasma_gondii_GT1 | gene_product=T-complex protein 1 eta subunit | transcript_product=T-complex protein 1 eta subunit | location=TGGT1_chrII:1806900-1814443(-) | protein_length=546 | sequence_SO=chromosome | SO=protein_coding	TGGT1_297500-t26_1-p1 [221-232]	0	1410.68	12
FALSE	High	FLGQGSAYYAPAASAVAMATSFLNDEK	[R].FLGQGSAYYAPAASAVAMATSFLNDEK.[R]	1xLabel:13C(6)15N(2) [K27]	1xLabel:13C(6)15N(2) [K27]			1.07307e-08	0	1	1	2	TGGT1_232350-t26_1-p1	transcript=TGGT1_232350-t26_1 | gene=TGGT1_232350 | organism=Toxoplasma_gondii_GT1 | gene_product=lactate dehydrogenase LDH1 | transcript_product=lactate dehydrogenase LDH1 | location=TGGT1_chrVIII:2023599-2025126(+) | protein_length=329 | sequence_SO=chromosome | SO=protein_coding	TGGT1_232350-t26_1-p1 [237-263]	0	2788.34	27
FALSE	High	FLGQGSAYYAPAASAVAMATSFLNDEK	[R].FLGQGSAYYAPAASAVAMATSFLNDEK.[R]					9.51532e-11	0	1	1	1	TGGT1_232350-t26_1-p1	transcript=TGGT1_232350-t26_1 | gene=TGGT1_232350 | organism=Toxoplasma_gondii_GT1 | gene_product=lactate dehydrogenase LDH1 | transcript_product=lactate dehydrogenase LDH1 | location=TGGT1_chrVIII:2023599-2025126(+) | protein_length=329 | sequence_SO=chromosome | SO=protein_coding	TGGT1_232350-t26_1-p1 [237-263]	0	2780.32	27
FALSE	High	VDATSETDIADKQGVR	[K].VDATSETDIADKQGVR.[E]	1xLabel:13C(6)15N(2) [K12]; 1xLabel:13C(6)15N(4) [R16]	1xLabel:13C(6)15N(2) [K12]; 1xLabel:13C(6)15N(4) [R16]			4.41601e-05	0	1	1	4	TGGT1_211680-t26_1-p1	transcript=TGGT1_211680-t26_1 | gene=TGGT1_211680 | organism=Toxoplasma_gondii_GT1 | gene_product=protein disulfide isomerase | transcript_product=protein disulfide isomerase | location=TGGT1_chrIV:1556190-1558014(+) | protein_length=471 | sequence_SO=chromosome | SO=protein_coding	TGGT1_211680-t26_1-p1 [85-100]	1	1722.86	16
FALSE	High	FLGPYDSLTMFATQK	[K].FLGPYDSLTMFATQK.[Y]					0.00016327	0	1	1	2	TGGT1_269950-t26_1-p1	transcript=TGGT1_269950-t26_1 | gene=TGGT1_269950 | organism=Toxoplasma_gondii_GT1 | gene_product=hypothetical protein | transcript_product=hypothetical protein | location=TGGT1_chrVIII:5501073-5504592(-) | protein_length=944 | sequence_SO=chromosome | SO=protein_coding	TGGT1_269950-t26_1-p1 [554-568]	0	1718.85	15	0.308	18.513	-1.7	4.21	0.363051	0.0342663	0.723678	0.237106	8.36	89.11	0.308	0.125	1.734	7.386	18.513	51.575	-1.7	-2.99	0.79	2.88	4.21	5.69	13006.5	1809.52	4015.25	116528	39.68	140.04	35.07	79.02	5867.71
FALSE	High	VDDTLNVSGHR	[R].VDDTLNVSGHR.[L]					0.000198054	0	1	1	11	TGGT1_266640-t26_1-p1	transcript=TGGT1_266640-t26_1 | gene=TGGT1_266640 | organism=Toxoplasma_gondii_GT1 | gene_product=putative Acetyl-coenzyme A synthetase 2 | transcript_product=putative Acetyl-coenzyme A synthetase 2 | location=TGGT1_chrIX:887254-895827(+) | protein_length=714 | sequence_SO=chromosome | SO=protein_coding	TGGT1_266640-t26_1-p1 [574-584]	0	1212.6	11	1.005	1.07	0.01	0.1	0.546309	0.335082	0.807967	0.597302	26.78	11.94	1.005	0.823	2.6	1.07	0.974	1.157	0.01	-0.28	1.38	0.1	-0.04	0.21	146065	120274	1.58829e+06	1.70006e+06	85.29	67.43	22.28	30.62	344859
FALSE	High	VDDTLNVSGHR	[R].VDDTLNVSGHR.[L]	1xLabel:13C(6)15N(4) [R11]	1xLabel:13C(6)15N(4) [R11]			0.000108648	0	1	1	10	TGGT1_266640-t26_1-p1	transcript=TGGT1_266640-t26_1 | gene=TGGT1_266640 | organism=Toxoplasma_gondii_GT1 | gene_product=putative Acetyl-coenzyme A synthetase 2 | transcript_product=putative Acetyl-coenzyme A synthetase 2 | location=TGGT1_chrIX:887254-895827(+) | protein_length=714 | sequence_SO=chromosome | SO=protein_coding	TGGT1_266640-t26_1-p1 [574-584]	0	1222.61	11
FALSE	High	VDDVLGSGLALLR	[K].VDDVLGSGLALLR.[Q]					3.19204e-05	0	1	1	5	TGGT1_306650-t26_1-p1	transcript=TGGT1_306650-t26_1 | gene=TGGT1_306650 | organism=Toxoplasma_gondii_GT1 | gene_product=hypothetical protein | transcript_product=hypothetical protein | location=TGGT1_chrIX:6020484-6022587(-) | protein_length=286 | sequence_SO=chromosome | SO=protein_coding	TGGT1_306650-t26_1-p1 [259-271]	0	1327.76	13	0.189	0.872	-2.4	-0.2	0.393967	0.184998	0.736886	0.501823	2.31	10.67	0.107	2.325	0.189	0.955	0.872	0.708	-3.23	1.22	-2.4	-0.07	-0.2	-0.5	49602	6724.56	478203	417104	81.48	42.01	89.99	75.18	49602
FALSE	High	FLGGVTIASGGVMPNVHSVLLPK	[K].FLGGVTIASGGVMPNVHSVLLPK.[K]	1xOxidation [M13]; 1xLabel:13C(6)15N(2) [K23]	1xOxidation [M13]; 1xLabel:13C(6)15N(2) [K23]			4.3952e-07	0	1	1	14	TGGT1_261250-t26_1-p1	transcript=TGGT1_261250-t26_1 | gene=TGGT1_261250 | organism=Toxoplasma_gondii_GT1 | gene_product=histone H2A1 | transcript_product=histone H2A1 | location=TGGT1_chrVIIb:1779724-1780266(-) | protein_length=180 | sequence_SO=chromosome | SO=protein_coding	TGGT1_261250-t26_1-p1 [150-172]	0	2317.28	23
FALSE	High	FLGGVTIASGGVMPNVHSVLLPK	[K].FLGGVTIASGGVMPNVHSVLLPK.[K]	1xOxidation [M13]	1xOxidation [M13]			1.99467e-07	0	1	1	18	TGGT1_261250-t26_1-p1	transcript=TGGT1_261250-t26_1 | gene=TGGT1_261250 | organism=Toxoplasma_gondii_GT1 | gene_product=histone H2A1 | transcript_product=histone H2A1 | location=TGGT1_chrVIIb:1779724-1780266(-) | protein_length=180 | sequence_SO=chromosome | SO=protein_coding	TGGT1_261250-t26_1-p1 [150-172]	0	2309.27	23	0.605	0.617	-0.72	-0.7	0.124199	0.021018	0.567443	0.210343	0.71	0.71	0.605	0.922	0.597	0.617	0.74	0.609	-0.72	-0.12	-0.74	-0.7	-0.43	-0.71	589588	356727	9378331	6.942e+06	68.77	55.55	55.83	50.11	589588
FALSE	High	FLGGVTIASGGVMPNVHSVLLPK	[K].FLGGVTIASGGVMPNVHSVLLPK.[K]	1xLabel:13C(6)15N(2) [K23]	1xLabel:13C(6)15N(2) [K23]			2.08718e-08	0	1	1	15	TGGT1_261250-t26_1-p1	transcript=TGGT1_261250-t26_1 | gene=TGGT1_261250 | organism=Toxoplasma_gondii_GT1 | gene_product=histone H2A1 | transcript_product=histone H2A1 | location=TGGT1_chrVIIb:1779724-1780266(-) | protein_length=180 | sequence_SO=chromosome | SO=protein_coding	TGGT1_261250-t26_1-p1 [150-172]	0	2301.29	23
FALSE	High	FLGGVTIASGGVMPNVHSVLLPK	[K].FLGGVTIASGGVMPNVHSVLLPK.[K]					1.02023e-08	0	1	1	13	TGGT1_261250-t26_1-p1	transcript=TGGT1_261250-t26_1 | gene=TGGT1_261250 | organism=Toxoplasma_gondii_GT1 | gene_product=histone H2A1 | transcript_product=histone H2A1 | location=TGGT1_chrVIIb:1779724-1780266(-) | protein_length=180 | sequence_SO=chromosome | SO=protein_coding	TGGT1_261250-t26_1-p1 [150-172]	0	2293.27	23	2.348	0.655	1.23	-0.61	0.334848	0.0148733	0.711667	0.20435	60.86	3.36	3.312	2.348	0.728	0.62	0.734	0.655	1.73	1.23	-0.46	-0.69	-0.45	-0.61	4546.64	9567.3	19372574	14222990	91.84	29.94	103.14	101.35	1731.42
FALSE	High	FLGGVTIANGGVMPHVHAVLLPK	[K].FLGGVTIANGGVMPHVHAVLLPK.[H]	1xOxidation [M13]	1xOxidation [M13]			1.14996e-05	0	1	1	10	TGGT1_261580-t26_1-p1	transcript=TGGT1_261580-t26_1 | gene=TGGT1_261580 | organism=Toxoplasma_gondii_GT1 | gene_product=histone H2AX | transcript_product=histone H2AX | location=TGGT1_chrVIIb:1624096-1624503(-) | protein_length=135 | sequence_SO=chromosome | SO=protein_coding	TGGT1_261580-t26_1-p1 [99-121]	0	2343.3	23	1.053	0.64	0.07	-0.64	0.449172	0.01391	0.763254	0.204185	4.62	4.93	1.086	1.053	0.052	0.692	0.574	0.64	0.12	0.07	-4.28	-0.53	-0.8	-0.64	12999.8	12002	961357	665347	113.86	50.87	82.17	82.79	11050.2
FALSE	High	FLGGVTIANGGVMPHVHAVLLPK	[K].FLGGVTIANGGVMPHVHAVLLPK.[H]	1xLabel:13C(6)15N(2) [K23]	1xLabel:13C(6)15N(2) [K23]			4.12958e-05	0	1	1	11	TGGT1_261580-t26_1-p1	transcript=TGGT1_261580-t26_1 | gene=TGGT1_261580 | organism=Toxoplasma_gondii_GT1 | gene_product=histone H2AX | transcript_product=histone H2AX | location=TGGT1_chrVIIb:1624096-1624503(-) | protein_length=135 | sequence_SO=chromosome | SO=protein_coding	TGGT1_261580-t26_1-p1 [99-121]	0	2335.32	23
FALSE	High	LPMAPQALAEWAIYEQR	[R].LPMAPQALAEWAIYEQR.[L]					0.000107748	0	1	1	1	TGGT1_304990-t26_1-p1	transcript=TGGT1_304990-t26_1 | gene=TGGT1_304990 | organism=Toxoplasma_gondii_GT1 | gene_product=guanylate-binding protein, N-terminal domain-containing protein | transcript_product=guanylate-binding protein, N-terminal domain-containing protein | location=TGGT1_chrIX:4925765-4936769(+) | protein_length=1281 | sequence_SO=chromosome | SO=protein_coding	TGGT1_304990-t26_1-p1 [774-790]	0	1987.01	17
FALSE	High	LVVASGNTVEPYMPTLFAR	[K].LVVASGNTVEPYMPTLFAR.[A]	1xOxidation [M13]	1xOxidation [M13]			4.86984e-06	0	1	1	3	TGGT1_260260-t26_1-p1	transcript=TGGT1_260260-t26_1 | gene=TGGT1_260260 | organism=Toxoplasma_gondii_GT1 | gene_product=ribosomal protein RPP1 | transcript_product=ribosomal protein RPP1 | location=TGGT1_chrVIIb:2389422-2391225(-) | protein_length=179 | sequence_SO=chromosome | SO=protein_coding	TGGT1_260260-t26_1-p1 [102-120]	0	2081.07	19	0.726	0.824	-0.46	-0.28	0.0128298	0.0459238	0.251092	0.259574	0.42	4.72	0.73	0.726	0.644	0.824	0.863	0.734	-0.45	-0.46	-0.64	-0.28	-0.21	-0.45	336863	219847	1296259	1.11822e+06	44.05	42.59	41.77	33.76	336863
FALSE	High	LPNPADVLGPMDK	[K].LPNPADVLGPMDK.[E]					2.96615e-05	0	1	1	18	TGGT1_257680-t26_1-p1	transcript=TGGT1_257680-t26_1 | gene=TGGT1_257680 | organism=Toxoplasma_gondii_GT1 | gene_product=myosin light chain MLC1 | transcript_product=myosin light chain MLC1 | location=TGGT1_chrVIIb:3843366-3845688(+) | protein_length=213 | sequence_SO=chromosome | SO=protein_coding	TGGT1_257680-t26_1-p1 [15-27]	0	1366.7	13	1.588	0.822	0.67	-0.28	0.526592	0.937695	0.798642	0.957421	87.29	6.29	2.523	1.588	0.631	0.77	1.688	0.822	1.34	0.67	-0.66	-0.38	0.76	-0.28	11029.5	12795	1.74253e+06	2941195	19.13	71.65	65.99	49.87	11774.5
FALSE	High	LVVASGNTVEPYMPTLFAR	[K].LVVASGNTVEPYMPTLFAR.[A]	1xLabel:13C(6)15N(4) [R19]	1xLabel:13C(6)15N(4) [R19]			1.2429e-06	0	1	1	6	TGGT1_260260-t26_1-p1	transcript=TGGT1_260260-t26_1 | gene=TGGT1_260260 | organism=Toxoplasma_gondii_GT1 | gene_product=ribosomal protein RPP1 | transcript_product=ribosomal protein RPP1 | location=TGGT1_chrVIIb:2389422-2391225(-) | protein_length=179 | sequence_SO=chromosome | SO=protein_coding	TGGT1_260260-t26_1-p1 [102-120]	0	2075.09	19
FALSE	High	TFVDTQEVAQNVR	[K].TFVDTQEVAQNVR.[K]	1xLabel:13C(6)15N(4) [R13]	1xLabel:13C(6)15N(4) [R13]			6.95073e-06	0	1	1	1	TGGT1_230350-t26_1-p1	transcript=TGGT1_230350-t26_1 | gene=TGGT1_230350 | organism=Toxoplasma_gondii_GT1 | gene_product=hypothetical protein | transcript_product=hypothetical protein | location=TGGT1_chrVIII:718292-730284(-) | protein_length=1254 | sequence_SO=chromosome | SO=protein_coding	TGGT1_230350-t26_1-p1 [551-563]	0	1516.76	13	0.483	0.099	-1.05	-3.33	0.409717	0.519578	0.743461	0.664101	19.94	1.12	0.483	0.205	1.594	7.627	0.099	0.023	-1.05	-2.28	0.67	2.93	-3.33	-5.44	6481.15	3133.38	13396.1	13204.9	11.84	105.01	166.77	74.42	6481.15
FALSE	High	TFVDTQEVAQNVR	[K].TFVDTQEVAQNVR.[K]					7.80225e-06	0	1	1	1	TGGT1_230350-t26_1-p1	transcript=TGGT1_230350-t26_1 | gene=TGGT1_230350 | organism=Toxoplasma_gondii_GT1 | gene_product=hypothetical protein | transcript_product=hypothetical protein | location=TGGT1_chrVIII:718292-730284(-) | protein_length=1254 | sequence_SO=chromosome | SO=protein_coding	TGGT1_230350-t26_1-p1 [551-563]	0	1506.75	13
FALSE	High	VDAAVAEATAFAEK	[K].VDAAVAEATAFAEK.[K]					0.000175066	0	1	1	1	TGGT1_219540-t26_1-p1	transcript=TGGT1_219540-t26_1 | gene=TGGT1_219540 | organism=Toxoplasma_gondii_GT1 | gene_product=cytosolic tRNA-Ala synthetase | transcript_product=cytosolic tRNA-Ala synthetase | location=TGGT1_chrXII:800723-814444(-) | protein_length=1280 | sequence_SO=chromosome | SO=protein_coding	TGGT1_219540-t26_1-p1 [1263-1276]	0	1392.7	14
FALSE	High	SDFSGDVEELAEAAR	[R].SDFSGDVEELAEAAR.[E]	1xLabel:13C(6)15N(4) [R15]	1xLabel:13C(6)15N(4) [R15]			1.55764e-06	0	2	2	17	TGGT1_277270-t26_1-p1; TGGT1_360830-t26_1-p1	transcript=TGGT1_277270-t26_1 | gene=TGGT1_277270 | organism=Toxoplasma_gondii_GT1 | gene_product=NTPase II | transcript_product=NTPase II | location=AAQM03000418:1-4939(+) | protein_length=862 | sequence_SO=contig | SO=protein_coding transcript=TGGT1_360830-t26_1 | gene=TGGT1_360830 | organism=Toxoplasma_gondii_GT1 | gene_product=nucleoside-triphosphatase | transcript_product=nucleoside-triphosp…	TGGT1_277270-t26_1-p1 [373-387]; TGGT1_360830-t26_1-p1 [251-265]	0	1605.73	15
FALSE	High	FLITATDVIHSWAVPALGIK	[R].FLITATDVIHSWAVPALGIK.[A]					2.74791e-05	0	1	1	4	TGGT1_310470-t26_1-p1	transcript=TGGT1_310470-t26_1 | gene=TGGT1_310470 | organism=Toxoplasma_gondii_GT1 | gene_product=putative cytochrome C oxidase subunit IIb | transcript_product=putative cytochrome C oxidase subunit IIb | location=TGGT1_chrXI:1338649-1339224(+) | protein_length=191 | sequence_SO=chromosome | SO=protein_coding	TGGT1_310470-t26_1-p1 [114-133]	0	2152.22	20	3.626	0.449	1.86	-1.15	0.129574	0.342653	0.576193	0.600445	26.2	29.24	1.224	3.626	4.266	0.449	1.068	0.01	0.29	1.86	2.09	-1.15	0.09	-6.64	3725.62	9406.95	462893	207897	63.86	23.66	56.39	95.13	7687.67
FALSE	High	IVTSVGPSSAIEFALK	[K].IVTSVGPSSAIEFALK.[L]					0.000100229	0	1	1	7	TGGT1_214290-t26_1-p1	transcript=TGGT1_214290-t26_1 | gene=TGGT1_214290 | organism=Toxoplasma_gondii_GT1 | gene_product=DJ-1 family protein | transcript_product=DJ-1 family protein | location=TGGT1_chrX:6106825-6108652(+) | protein_length=256 | sequence_SO=chromosome | SO=protein_coding	TGGT1_214290-t26_1-p1 [219-234]	0	1618.91	16	0.39	0.01	-1.36	-6.64	0.440741	0.159311	0.759946	0.479317	12.19	0	0.179	0.39	1.93	0.01	0.01	0.729	-2.48	-1.36	0.95	-6.64	-6.64	-0.46	9780.4	4528.33	1.87203e+06	12930.4	45.88	65.49	83.94	172.07	9780.4
FALSE	High	SILSGEAQTAFSNQFLQR	[R].SILSGEAQTAFSNQFLQR.[E]	1xLabel:13C(6)15N(4) [R18]	1xLabel:13C(6)15N(4) [R18]			0.000133778	0	1	1	2	TGGT1_263060-t26_1-p1	transcript=TGGT1_263060-t26_1 | gene=TGGT1_263060 | organism=Toxoplasma_gondii_GT1 | gene_product=Proteasome/cyclosome repeat-containing protein | transcript_product=Proteasome/cyclosome repeat-containing protein | location=TGGT1_chrVIIb:808221-820240(-) | protein_length=988 | sequence_SO=chromosome | SO=protein_coding	TGGT1_263060-t26_1-p1 [255-272]	0	2007.02	18
FALSE	High	FLGGVTIANGGVMPHVHAVLLPK	[K].FLGGVTIANGGVMPHVHAVLLPK.[H]					6.88921e-06	0	1	1	10	TGGT1_261580-t26_1-p1	transcript=TGGT1_261580-t26_1 | gene=TGGT1_261580 | organism=Toxoplasma_gondii_GT1 | gene_product=histone H2AX | transcript_product=histone H2AX | location=TGGT1_chrVIIb:1624096-1624503(-) | protein_length=135 | sequence_SO=chromosome | SO=protein_coding	TGGT1_261580-t26_1-p1 [99-121]	0	2327.31	23	0.783	0.657	-0.35	-0.61	0.462192	0.00965597	0.771246	0.199491	89.28	1.35	0.783	0.014	1.657	0.657	0.729	0.643	-0.35	-6.19	0.73	-0.61	-0.46	-0.64	11566.6	8092.35	3.43084e+06	2.50187e+06	122.88	73.77	116.05	112.49	11566.6
FALSE	High	FLIQSTAVSSDAPLAR	[R].FLIQSTAVSSDAPLAR.[D]	1xLabel:13C(6)15N(4) [R16]	1xLabel:13C(6)15N(4) [R16]			2.02286e-06	0	1	1	9	TGGT1_318160-t26_1-p1	transcript=TGGT1_318160-t26_1 | gene=TGGT1_318160 | organism=Toxoplasma_gondii_GT1 | gene_product=MSP (Major sperm protein) domain-containing protein | transcript_product=MSP (Major sperm protein) domain-containing protein | location=TGGT1_chrIV:1459846-1460565(+) | protein_length=239 | sequence_SO=chromosome | SO=protein_coding	TGGT1_318160-t26_1-p1 [86-101]	0	1685.91	16
FALSE	High	VDALTEAAEAAATAAGGK	[R].VDALTEAAEAAATAAGGK.[A]					1.49865e-06	0	1	1	5	TGGT1_205510-t26_1-p1	transcript=TGGT1_205510-t26_1 | gene=TGGT1_205510 | organism=Toxoplasma_gondii_GT1 | gene_product=putative nucleolar protein 5 | transcript_product=putative nucleolar protein 5 | location=TGGT1_chrVIIa:1272709-1276843(-) | protein_length=490 | sequence_SO=chromosome | SO=protein_coding	TGGT1_205510-t26_1-p1 [376-393]	0	1616.81	18	1.184	0.72	0.24	-0.47	0.564379	0.018934	0.815788	0.20435	60.2	4.71	0.054	1.665	1.184	0.764	0.72	0.648	-4.2	0.74	0.24	-0.39	-0.47	-0.63	7340.83	6602.44	420601	302668	48.35	79.14	76.48	68.47	11223
FALSE	High	VDALTEAAEAAATAAGGK	[R].VDALTEAAEAAATAAGGK.[A]	1xLabel:13C(6)15N(2) [K18]	1xLabel:13C(6)15N(2) [K18]			2.51248e-06	0	1	1	2	TGGT1_205510-t26_1-p1	transcript=TGGT1_205510-t26_1 | gene=TGGT1_205510 | organism=Toxoplasma_gondii_GT1 | gene_product=putative nucleolar protein 5 | transcript_product=putative nucleolar protein 5 | location=TGGT1_chrVIIa:1272709-1276843(-) | protein_length=490 | sequence_SO=chromosome | SO=protein_coding	TGGT1_205510-t26_1-p1 [376-393]	0	1624.83	18
FALSE	High	LVVASGNTVEPYMPTLFAR	[K].LVVASGNTVEPYMPTLFAR.[A]					1.04312e-06	0	1	1	11	TGGT1_260260-t26_1-p1	transcript=TGGT1_260260-t26_1 | gene=TGGT1_260260 | organism=Toxoplasma_gondii_GT1 | gene_product=ribosomal protein RPP1 | transcript_product=ribosomal protein RPP1 | location=TGGT1_chrVIIb:2389422-2391225(-) | protein_length=179 | sequence_SO=chromosome | SO=protein_coding	TGGT1_260260-t26_1-p1 [102-120]	0	2065.08	19	1.044	0.679	0.06	-0.56	0.61293	0.0235107	0.839361	0.213376	42.69	1.87	2.385	1.044	0.744	0.679	0.786	0.66	1.25	0.06	-0.43	-0.56	-0.35	-0.6	10350.4	9932.88	2.49806e+06	1785673	44.61	13.36	111.78	106.93	4164.26
FALSE	High	VDATSETDIADK	[K].VDATSETDIADK.[Q]					4.57304e-05	0	1	1	15	TGGT1_211680-t26_1-p1	transcript=TGGT1_211680-t26_1 | gene=TGGT1_211680 | organism=Toxoplasma_gondii_GT1 | gene_product=protein disulfide isomerase | transcript_product=protein disulfide isomerase | location=TGGT1_chrIV:1556190-1558014(+) | protein_length=471 | sequence_SO=chromosome | SO=protein_coding	TGGT1_211680-t26_1-p1 [85-96]	0	1264.59	12
FALSE	High	VDATSETDIADK	[K].VDATSETDIADK.[Q]	1xLabel:13C(6)15N(2) [K12]	1xLabel:13C(6)15N(2) [K12]			5.45914e-05	0	1	1	12	TGGT1_211680-t26_1-p1	transcript=TGGT1_211680-t26_1 | gene=TGGT1_211680 | organism=Toxoplasma_gondii_GT1 | gene_product=protein disulfide isomerase | transcript_product=protein disulfide isomerase | location=TGGT1_chrIV:1556190-1558014(+) | protein_length=471 | sequence_SO=chromosome | SO=protein_coding	TGGT1_211680-t26_1-p1 [85-96]	0	1272.6	12	0.756	0.736	-0.4	-0.44	0.0774553	0.0293569	0.473763	0.229322	6.48	4.7	0.814	0.756	0.584	0.824	0.736	0.693	-0.3	-0.4	-0.78	-0.28	-0.44	-0.53	259957	151691	1.41069e+06	1.09007e+06	26.43	34.04	54.13	46.59	297856
FALSE	High	LPNPADVLGPMDK	[K].LPNPADVLGPMDK.[E]	1xLabel:13C(6)15N(2) [K13]	1xLabel:13C(6)15N(2) [K13]			4.12958e-05	0	1	1	17	TGGT1_257680-t26_1-p1	transcript=TGGT1_257680-t26_1 | gene=TGGT1_257680 | organism=Toxoplasma_gondii_GT1 | gene_product=myosin light chain MLC1 | transcript_product=myosin light chain MLC1 | location=TGGT1_chrVIIb:3843366-3845688(+) | protein_length=213 | sequence_SO=chromosome | SO=protein_coding	TGGT1_257680-t26_1-p1 [15-27]	0	1374.72	13
FALSE	High	FLGTPIYLQMPSR	[K].FLGTPIYLQMPSR.[R]	1xLabel:13C(6)15N(4) [R13]	1xLabel:13C(6)15N(4) [R13]			0.000206493	0	1	1	2	TGGT1_239820-t26_1-p1	transcript=TGGT1_239820-t26_1 | gene=TGGT1_239820 | organism=Toxoplasma_gondii_GT1 | gene_product=D-3-phosphoglycerate dehydrogenase | transcript_product=D-3-phosphoglycerate dehydrogenase | location=TGGT1_chrVI:931789-940557(-) | protein_length=604 | sequence_SO=chromosome | SO=protein_coding	TGGT1_239820-t26_1-p1 [458-470]	0	1532.82	13
FALSE	High	FLIQSTAVSSDAPLAR	[R].FLIQSTAVSSDAPLAR.[D]					2.44624e-06	0	1	1	11	TGGT1_318160-t26_1-p1	transcript=TGGT1_318160-t26_1 | gene=TGGT1_318160 | organism=Toxoplasma_gondii_GT1 | gene_product=MSP (Major sperm protein) domain-containing protein | transcript_product=MSP (Major sperm protein) domain-containing protein | location=TGGT1_chrIV:1459846-1460565(+) | protein_length=239 | sequence_SO=chromosome | SO=protein_coding	TGGT1_318160-t26_1-p1 [86-101]	0	1675.9	16	0.706	0.865	-0.5	-0.21	0.337962	0.166134	0.713404	0.485286	17.71	9.1	0.875	0.045	0.706	0.865	0.936	0.692	-0.19	-4.48	-0.5	-0.21	-0.1	-0.53	141462	111279	928096	802904	50.2	84.54	105.82	92.1	141462
FALSE	High	VDVTVSQSPAGPHSPLSASPQTGTAASLK	[R].VDVTVSQSPAGPHSPLSASPQTGTAASLK.[L]	1xLabel:13C(6)15N(2) [K29]	1xLabel:13C(6)15N(2) [K29]			5.48419e-09	0	1	1	9	TGGT1_216000-t26_1-p1	transcript=TGGT1_216000-t26_1 | gene=TGGT1_216000 | organism=Toxoplasma_gondii_GT1 | gene_product=alveolin domain containing intermediate filament IMC3 | transcript_product=alveolin domain containing intermediate filament IMC3 | location=TGGT1_chrXI:6395592-6397208(+) | protein_length=538 | sequence_SO=chromosome | SO=protein_coding	TGGT1_216000-t26_1-p1 [325-353]	0	2798.44	29	0.955	0.686	-0.07	-0.54	0.63591	0.00666775	0.849393	0.197599	14.42	0.81	0.955	0.853	1.806	0.678	0.744	0.686	-0.07	-0.23	0.85	-0.56	-0.43	-0.54	10566.7	10004.4	1.37848e+06	956512	123.22	113.73	86.71	84.72	67056.5
FALSE	High	LVVASGNTVEPYMPTLFAR	[K].LVVASGNTVEPYMPTLFAR.[A]	1xOxidation [M13]; 1xLabel:13C(6)15N(4) [R19]	1xOxidation [M13]; 1xLabel:13C(6)15N(4) [R19]			3.52654e-05	0	1	1	3	TGGT1_260260-t26_1-p1	transcript=TGGT1_260260-t26_1 | gene=TGGT1_260260 | organism=Toxoplasma_gondii_GT1 | gene_product=ribosomal protein RPP1 | transcript_product=ribosomal protein RPP1 | location=TGGT1_chrVIIb:2389422-2391225(-) | protein_length=179 | sequence_SO=chromosome | SO=protein_coding	TGGT1_260260-t26_1-p1 [102-120]	0	2091.08	19
FALSE	High	VDDVLGSGLALLR	[K].VDDVLGSGLALLR.[Q]	1xLabel:13C(6)15N(4) [R13]	1xLabel:13C(6)15N(4) [R13]			0.000119322	0	1	1	3	TGGT1_306650-t26_1-p1	transcript=TGGT1_306650-t26_1 | gene=TGGT1_306650 | organism=Toxoplasma_gondii_GT1 | gene_product=hypothetical protein | transcript_product=hypothetical protein | location=TGGT1_chrIX:6020484-6022587(-) | protein_length=286 | sequence_SO=chromosome | SO=protein_coding	TGGT1_306650-t26_1-p1 [259-271]	0	1337.77	13
FALSE	High	FIDLSASENPNLDPK	[K].FIDLSASENPNLDPK.[E]					9.88819e-07	0	1	1	23	TGGT1_235470-t26_1-p1	transcript=TGGT1_235470-t26_1 | gene=TGGT1_235470 | organism=Toxoplasma_gondii_GT1 | gene_product=myosin A | transcript_product=myosin A | location=TGGT1_chrX:4773284-4778894(+) | protein_length=831 | sequence_SO=chromosome | SO=protein_coding	TGGT1_235470-t26_1-p1 [720-734]	0	1659.82	15	0.726	0.767	-0.46	-0.38	0.00222451	0.0101686	0.205517	0.199491	1.94	2.37	0.726	0.744	0.706	0.746	0.814	0.767	-0.46	-0.43	-0.5	-0.42	-0.3	-0.38	498878	362073	2.71593e+06	2.02604e+06	58.99	56.97	85.82	85.04	498878
FALSE	High	SDEMASMSTPAAELQR	[K].SDEMASMSTPAAELQR.[A]	1xLabel:13C(6)15N(4) [R16]	1xLabel:13C(6)15N(4) [R16]			7.6869e-05	0	1	1	2	TGGT1_246130-t26_1-p1	transcript=TGGT1_246130-t26_1 | gene=TGGT1_246130 | organism=Toxoplasma_gondii_GT1 | gene_product=serpin (serine proteinase inhibitor) superfamily protein | transcript_product=serpin (serine proteinase inhibitor) superfamily protein | location=TGGT1_chrXII:2610457-2612239(+) | protein_length=432 | sequence_SO=chromosome | SO=protein_coding	TGGT1_246130-t26_1-p1 [20-35]	0	1733.77	16
FALSE	High	VDFNVPMKDGVVQDATR	[R].VDFNVPMKDGVVQDATR.[I]	1xLabel:13C(6)15N(2) [K8]; 1xLabel:13C(6)15N(4) [R17]	1xLabel:13C(6)15N(2) [K8]; 1xLabel:13C(6)15N(4) [R17]			4.81884e-05	0	1	1	6	TGGT1_318230-t26_1-p1	transcript=TGGT1_318230-t26_1 | gene=TGGT1_318230 | organism=Toxoplasma_gondii_GT1 | gene_product=phosphoglycerate kinase PGKI | transcript_product=phosphoglycerate kinase PGKI | location=TGGT1_chrIV:1413955-1416908(+) | protein_length=417 | sequence_SO=chromosome | SO=protein_coding	TGGT1_318230-t26_1-p1 [24-40]	1	1908.96	17	0.856	1.028	-0.22	0.04	0.429507	0.858926	0.754821	0.903606	46.49	30.49	1.222	0.856	0.013	1.028	1.289	0.817	0.29	-0.22	-6.32	0.04	0.37	-0.29	11596.6	6575	454699	467610	157.23	50.81	67.61	45.78	5379.86
FALSE	High	KLPPDVQVALFSATMPQDILELTTK	[K].KLPPDVQVALFSATMPQDILELTTK.[F]					1.27758e-07	0	1	1	1	TGGT1_250770-t26_1-p1	transcript=TGGT1_250770-t26_1 | gene=TGGT1_250770 | organism=Toxoplasma_gondii_GT1 | gene_product=putative eukaryotic initiation factor-4A | transcript_product=putative eukaryotic initiation factor-4A | location=TGGT1_chrXII:5123731-5125767(-) | protein_length=412 | sequence_SO=chromosome | SO=protein_coding	TGGT1_250770-t26_1-p1 [208-232]	1	2755.5	25
FALSE	High	LVVTPQSGVPSSASLSMPQDFNPLQPLVAR	[R].LVVTPQSGVPSSASLSMPQDFNPLQPLVAR.[G]					1.76563e-05	0	1	1	1	TGGT1_311230-t26_1-p1	transcript=TGGT1_311230-t26_1 | gene=TGGT1_311230 | organism=Toxoplasma_gondii_GT1 | gene_product=hypothetical protein | transcript_product=hypothetical protein | location=TGGT1_chrXI:1844321-1862670(+) | protein_length=4603 | sequence_SO=chromosome | SO=protein_coding	TGGT1_311230-t26_1-p1 [3789-3818]	0	3135.65	30	0.571	0.419	-0.81	-1.26	0.571672	0.479528	0.819742	0.64019	25.21	25.28	0.571	0.274	1.993	0.419	3.038	0.012	-0.81	-1.87	0.99	-1.26	1.6	-6.41	3043.3	3415.72	8850.18	6580.7	49.79	66.93	167.33	59.36	5977.14
FALSE	High	VDGLLAEAYTVPYLQPLHFDYAK	[R].VDGLLAEAYTVPYLQPLHFDYAK.[E]					6.1106e-05	0	1	1	2	TGGT1_249990-t26_1-p1	transcript=TGGT1_249990-t26_1 | gene=TGGT1_249990 | organism=Toxoplasma_gondii_GT1 | gene_product=hypothetical protein | transcript_product=hypothetical protein | location=TGGT1_chrXII:4909167-4913985(-) | protein_length=838 | sequence_SO=chromosome | SO=protein_coding	TGGT1_249990-t26_1-p1 [507-529]	0	2623.34	23
FALSE	High	FLAPFDLVTIPGKPLVQK	[R].FLAPFDLVTIPGKPLVQK.[A]	2xLabel:13C(6)15N(2) [K13; K18]	2xLabel:13C(6)15N(2) [K13; K18]			3.34538e-05	0	2	2	10	TGGT1_295125-t26_1-p1; TGGT1_295110-t26_1-p1	transcript=TGGT1_295125-t26_1 | gene=TGGT1_295125 | organism=Toxoplasma_gondii_GT1 | gene_product=rhoptry protein ROP4 | transcript_product=rhoptry protein ROP4 | location=TGGT1_chrIa:1394541-1396277(-) | protein_length=365 | sequence_SO=chromosome | SO=protein_coding transcript=TGGT1_295110-t26_1 | gene=TGGT1_295110 | organism=Toxoplasma_gondii_GT1 | gene_product=rhoptry protein ROP7 | transcrip…	TGGT1_295125-t26_1-p1 [116-133]; TGGT1_295110-t26_1-p1 [326-343]	0	1999.2	18
FALSE	High	FLAPFDLVTIPGKPLVQK	[R].FLAPFDLVTIPGKPLVQK.[A]	1xLabel:13C(6)15N(2) [K]	1xLabel:13C(6)15N(2) [K13; K18]			8.57806e-06	0	2	2	15	TGGT1_295125-t26_1-p1; TGGT1_295110-t26_1-p1	transcript=TGGT1_295125-t26_1 | gene=TGGT1_295125 | organism=Toxoplasma_gondii_GT1 | gene_product=rhoptry protein ROP4 | transcript_product=rhoptry protein ROP4 | location=TGGT1_chrIa:1394541-1396277(-) | protein_length=365 | sequence_SO=chromosome | SO=protein_coding transcript=TGGT1_295110-t26_1 | gene=TGGT1_295110 | organism=Toxoplasma_gondii_GT1 | gene_product=rhoptry protein ROP7 | transcrip…	TGGT1_295125-t26_1-p1 [116-133]; TGGT1_295110-t26_1-p1 [326-343]	0	1991.18	18
FALSE	High	FLAPFDLVTIPGKPLVQK	[R].FLAPFDLVTIPGKPLVQK.[A]					1.49188e-05	0	2	2	9	TGGT1_295125-t26_1-p1; TGGT1_295110-t26_1-p1	transcript=TGGT1_295125-t26_1 | gene=TGGT1_295125 | organism=Toxoplasma_gondii_GT1 | gene_product=rhoptry protein ROP4 | transcript_product=rhoptry protein ROP4 | location=TGGT1_chrIa:1394541-1396277(-) | protein_length=365 | sequence_SO=chromosome | SO=protein_coding transcript=TGGT1_295110-t26_1 | gene=TGGT1_295110 | organism=Toxoplasma_gondii_GT1 | gene_product=rhoptry protein ROP7 | transcrip…	TGGT1_295125-t26_1-p1 [116-133]; TGGT1_295110-t26_1-p1 [326-343]	0	1983.17	18	0.777	0.738	-0.36	-0.44	0.845277	0.0147059	0.942757	0.20435	14.98	0.04	0.777	2.677	0.647	0.738	0.815	0.738	-0.36	1.42	-0.63	-0.44	-0.29	-0.44	152068	118131	6.21361e+06	5.06598e+06	108.15	87.68	87.66	84.61	152068
FALSE	High	VDGLLAEAYTVPYLQPLHFDYAK	[R].VDGLLAEAYTVPYLQPLHFDYAK.[E]	1xLabel:13C(6)15N(2) [K23]	1xLabel:13C(6)15N(2) [K23]			2.9229e-05	0	1	1	1	TGGT1_249990-t26_1-p1	transcript=TGGT1_249990-t26_1 | gene=TGGT1_249990 | organism=Toxoplasma_gondii_GT1 | gene_product=hypothetical protein | transcript_product=hypothetical protein | location=TGGT1_chrXII:4909167-4913985(-) | protein_length=838 | sequence_SO=chromosome | SO=protein_coding	TGGT1_249990-t26_1-p1 [507-529]	0	2631.36	23	1.015	0.795	0.02	-0.33	0.797641	0.0219448	0.920401	0.211157	45.98	0.83	1.015	0.7	1.788	0.802	0.795	0.708	0.02	-0.51	0.84	-0.32	-0.33	-0.5	8940.63	13332.9	220186	175018	32.71	38.22	94.2	87.65	13745.1
FALSE	High	VDGNDLFASLLATK	[R].VDGNDLFASLLATK.[K]					5.12186e-05	0	1	1	1	TGGT1_239490-t26_1-p1	transcript=TGGT1_239490-t26_1 | gene=TGGT1_239490 | organism=Toxoplasma_gondii_GT1 | gene_product=dehydrogenase E1 component family protein | transcript_product=dehydrogenase E1 component family protein | location=TGGT1_chrVI:705091-710904(-) | protein_length=571 | sequence_SO=chromosome | SO=protein_coding	TGGT1_239490-t26_1-p1 [420-433]	0	1463.77	14	3.608	52.439	1.85	5.71	0.364787	0.112789	0.724359	0.410585	126.32	134.47	0.534	3.608	20.186	52.439	100	2.941	-0.91	1.85	4.34	5.71	6.64	1.56	1946.14	7022.2	2722.07	502157	127.37	26.43	105.81	88.1	11039.7
FALSE	High	FLADQSEFALAR	[K].FLADQSEFALAR.[D]	1xLabel:13C(6)15N(4) [R12]	1xLabel:13C(6)15N(4) [R12]			0.000168435	0	1	1	3	TGGT1_207620-t26_1-p1	transcript=TGGT1_207620-t26_1 | gene=TGGT1_207620 | organism=Toxoplasma_gondii_GT1 | gene_product=pyridine nucleotide-disulfide oxidoreductase domain-containing protein | transcript_product=pyridine nucleotide-disulfide oxidoreductase domain-containing protein | location=TGGT1_chrIb:171089-178693(-) | protein_length=664 | sequence_SO=chromosome | SO=protein_coding	TGGT1_207620-t26_1-p1 [485-496]	0	1377.7	12	0.071	0.01	-3.82	-6.64	0.110712	0.013393	0.54789	0.204185	0.2	0	0.071	0.09	0.01	0.01	0.018	0.01	-3.82	-3.47	-6.64	-6.64	-5.8	-6.64	162702	8985.48	743971	7503.78	87.79	81.72	77.87	72.6	162702
FALSE	High	FLADQSEFALAR	[K].FLADQSEFALAR.[D]					6.19934e-05	0	1	1	6	TGGT1_207620-t26_1-p1	transcript=TGGT1_207620-t26_1 | gene=TGGT1_207620 | organism=Toxoplasma_gondii_GT1 | gene_product=pyridine nucleotide-disulfide oxidoreductase domain-containing protein | transcript_product=pyridine nucleotide-disulfide oxidoreductase domain-containing protein | location=TGGT1_chrIb:171089-178693(-) | protein_length=664 | sequence_SO=chromosome | SO=protein_coding	TGGT1_207620-t26_1-p1 [485-496]	0	1367.7	12
FALSE	High	VDIGQILMSIR	[R].VDIGQILMSIR.[T]					4.33947e-05	0	1	1	8	TGGT1_288720-t26_1-p1	transcript=TGGT1_288720-t26_1 | gene=TGGT1_288720 | organism=Toxoplasma_gondii_GT1 | gene_product=ribosomal protein RPL10 | transcript_product=ribosomal protein RPL10 | location=TGGT1_chrIX:2518172-2520490(-) | protein_length=221 | sequence_SO=chromosome | SO=protein_coding	TGGT1_288720-t26_1-p1 [129-139]	0	1244.7	11
FALSE	High	VDIGQILMSIR	[R].VDIGQILMSIR.[T]	1xLabel:13C(6)15N(4) [R11]	1xLabel:13C(6)15N(4) [R11]			8.98402e-05	0	1	1	7	TGGT1_288720-t26_1-p1	transcript=TGGT1_288720-t26_1 | gene=TGGT1_288720 | organism=Toxoplasma_gondii_GT1 | gene_product=ribosomal protein RPL10 | transcript_product=ribosomal protein RPL10 | location=TGGT1_chrIX:2518172-2520490(-) | protein_length=221 | sequence_SO=chromosome | SO=protein_coding	TGGT1_288720-t26_1-p1 [129-139]	0	1254.71	11	0.359	0.811	-1.48	-0.3	0.104042	0.0456163	0.532976	0.258959	2.81	6.52	0.359	0.306	0.777	0.865	0.811	0.731	-1.48	-1.71	-0.36	-0.21	-0.3	-0.45	8183.43	3037.34	2.70263e+06	2192649	5.66	47.68	62.37	53.65	8465.25
FALSE	High	FIDLSASENPNLDPK	[K].FIDLSASENPNLDPK.[E]	1xLabel:13C(6)15N(2) [K15]	1xLabel:13C(6)15N(2) [K15]			4.03969e-06	0	1	1	18	TGGT1_235470-t26_1-p1	transcript=TGGT1_235470-t26_1 | gene=TGGT1_235470 | organism=Toxoplasma_gondii_GT1 | gene_product=myosin A | transcript_product=myosin A | location=TGGT1_chrX:4773284-4778894(+) | protein_length=831 | sequence_SO=chromosome | SO=protein_coding	TGGT1_235470-t26_1-p1 [720-734]	0	1667.84	15
FALSE	High	LVVPEDSFPSSSSLYHR	[K].LVVPEDSFPSSSSLYHR.[I]	1xLabel:13C(6)15N(4) [R17]	1xLabel:13C(6)15N(4) [R17]			2.08313e-05	0	1	1	4	TGGT1_247220-t26_1-p1	transcript=TGGT1_247220-t26_1 | gene=TGGT1_247220 | organism=Toxoplasma_gondii_GT1 | gene_product=nudix -type motif 9 isoform a family protein | transcript_product=nudix -type motif 9 isoform a family protein | location=TGGT1_chrXII:3108760-3111719(-) | protein_length=546 | sequence_SO=chromosome | SO=protein_coding	TGGT1_247220-t26_1-p1 [103-119]	0	1929.96	17	3.811	1.18	1.93	0.24	0.11402	0.404361	0.552341	0.611976	70.28	23.53	2.005	14.349	3.811	0.993	100	1.18	1	3.84	1.93	-0.01	6.64	0.24	2095.78	17700.8	227781	293467	99.73	69.72	134.07	104.46	8829.79
FALSE	High	VDFNVPMKDGVVQDATR	[R].VDFNVPMKDGVVQDATR.[I]					7.1598e-06	0	1	1	4	TGGT1_318230-t26_1-p1	transcript=TGGT1_318230-t26_1 | gene=TGGT1_318230 | organism=Toxoplasma_gondii_GT1 | gene_product=phosphoglycerate kinase PGKI | transcript_product=phosphoglycerate kinase PGKI | location=TGGT1_chrIV:1413955-1416908(+) | protein_length=417 | sequence_SO=chromosome | SO=protein_coding	TGGT1_318230-t26_1-p1 [24-40]	1	1890.94	17
FALSE	High	FLDPIDELPEPFK	[R].FLDPIDELPEPFK.[A]					3.86131e-05	0	1	1	9	TGGT1_216650-t26_1-p1	transcript=TGGT1_216650-t26_1 | gene=TGGT1_216650 | organism=Toxoplasma_gondii_GT1 | gene_product=S15 sporozoite-expressed protein | transcript_product=S15 sporozoite-expressed protein | location=TGGT1_chrXI:5902644-5904672(-) | protein_length=400 | sequence_SO=chromosome | SO=protein_coding	TGGT1_216650-t26_1-p1 [58-70]	0	1559.8	13
FALSE	High	SDFSGDVEELAEAAR	[R].SDFSGDVEELAEAAR.[E]					8.65112e-07	0	2	2	17	TGGT1_277270-t26_1-p1; TGGT1_360830-t26_1-p1	transcript=TGGT1_277270-t26_1 | gene=TGGT1_277270 | organism=Toxoplasma_gondii_GT1 | gene_product=NTPase II | transcript_product=NTPase II | location=AAQM03000418:1-4939(+) | protein_length=862 | sequence_SO=contig | SO=protein_coding transcript=TGGT1_360830-t26_1 | gene=TGGT1_360830 | organism=Toxoplasma_gondii_GT1 | gene_product=nucleoside-triphosphatase | transcript_product=nucleoside-triphosp…	TGGT1_277270-t26_1-p1 [373-387]; TGGT1_360830-t26_1-p1 [251-265]	0	1595.72	15	0.981	1.044	-0.03	0.06	0.760388	0.987822	0.905573	0.990642	14.22	3.14	0.883	0.981	1.084	0.896	1.044	1.066	-0.18	-0.03	0.12	-0.16	0.06	0.09	749032	734913	6080646	6346824	23.43	33.01	33.36	40.28	557856
FALSE	High	FIFPEDNHGVIVLAEGR	[R].FIFPEDNHGVIVLAEGR.[L]	1xLabel:13C(6)15N(4) [R17]	1xLabel:13C(6)15N(4) [R17]			5.90509e-06	0	1	1	7	TGGT1_225050-t26_1-p1	transcript=TGGT1_225050-t26_1 | gene=TGGT1_225050 | organism=Toxoplasma_gondii_GT1 | gene_product=putative adenosylhomocysteinase | transcript_product=putative adenosylhomocysteinase | location=TGGT1_chrX:2464799-2467238(-) | protein_length=588 | sequence_SO=chromosome | SO=protein_coding	TGGT1_225050-t26_1-p1 [481-497]	0	1923	17	0.579	0.759	-0.79	-0.4	0.998951	0.0340078	0.999647	0.237106	7.96	3.35	0.486	0.579	3.559	0.759	0.789	0.649	-1.04	-0.79	1.83	-0.4	-0.34	-0.62	4942.52	4748.01	3.07434e+06	2.42472e+06	71.81	40.28	79.18	68.55	9759.56
FALSE	High	FIFPEDNHGVIVLAEGR	[R].FIFPEDNHGVIVLAEGR.[L]					5.54862e-06	0	1	1	8	TGGT1_225050-t26_1-p1	transcript=TGGT1_225050-t26_1 | gene=TGGT1_225050 | organism=Toxoplasma_gondii_GT1 | gene_product=putative adenosylhomocysteinase | transcript_product=putative adenosylhomocysteinase | location=TGGT1_chrX:2464799-2467238(-) | protein_length=588 | sequence_SO=chromosome | SO=protein_coding	TGGT1_225050-t26_1-p1 [481-497]	0	1912.99	17
FALSE	High	KLMQLLEEDTVAILDSQLNEK	[K].KLMQLLEEDTVAILDSQLNEK.[Q]	2xLabel:13C(6)15N(2) [K1; K21]	2xLabel:13C(6)15N(2) [K1; K21]			1.55764e-06	0	1	1	1	TGGT1_277270-t26_1-p1	transcript=TGGT1_277270-t26_1 | gene=TGGT1_277270 | organism=Toxoplasma_gondii_GT1 | gene_product=NTPase II | transcript_product=NTPase II | location=AAQM03000418:1-4939(+) | protein_length=862 | sequence_SO=contig | SO=protein_coding	TGGT1_277270-t26_1-p1 [15-35]	1	2446.31	21	1.167	4.679	0.22	2.23	0.379205	0.171981	0.733476	0.491513	25.17	47.97	0.969	4.552	1.167	100	4.679	3.165	-0.05	2.19	0.22	6.64	2.23	1.66	10873.4	12689.3	3807.11	27767.2	57.24	9.51	64.9	159.98	11071.5
FALSE	High	VDENVVAIALPYSDPNTAMYIIQPR	[K].VDENVVAIALPYSDPNTAMYIIQPR.[D]	1xLabel:13C(6)15N(4) [R25]	1xLabel:13C(6)15N(4) [R25]			1.86757e-05	0	1	1	1	TGGT1_246130-t26_1-p1	transcript=TGGT1_246130-t26_1 | gene=TGGT1_246130 | organism=Toxoplasma_gondii_GT1 | gene_product=serpin (serine proteinase inhibitor) superfamily protein | transcript_product=serpin (serine proteinase inhibitor) superfamily protein | location=TGGT1_chrXII:2610457-2612239(+) | protein_length=432 | sequence_SO=chromosome | SO=protein_coding	TGGT1_246130-t26_1-p1 [236-260]	0	2799.43	25	0.898	0.974	-0.15	-0.04	0.788934	0.417491	0.917465	0.617555	110.73	5.51	0.898	5.228	0.067	1.012	0.191	0.974	-0.15	2.39	-3.91	0.02	-2.39	-0.04	8300.54	10706.5	13076.7	8206.54	62.22	82.35	163.9	168.3	11919.8
FALSE	High	VDEVLSMVPADPFR	[R].VDEVLSMVPADPFR.[L]					0.00013414	0	1	1	10	TGGT1_288650-t26_1-p1	transcript=TGGT1_288650-t26_1 | gene=TGGT1_288650 | organism=Toxoplasma_gondii_GT1 | gene_product=dense granule protein GRA12 | transcript_product=dense granule protein GRA12 | location=TGGT1_chrIX:2467879-2469672(-) | protein_length=436 | sequence_SO=chromosome | SO=protein_coding	TGGT1_288650-t26_1-p1 [252-265]	0	1574.79	14	1.678	0.822	0.75	-0.28	0.625803	0.0125302	0.845652	0.203151	104.99	1.12	0.49	3.07	1.678	0.813	0.869	0.822	-1.03	1.62	0.75	-0.3	-0.2	-0.28	6042.92	10445.4	3.23718e+06	2.7038e+06	24.23	56.91	93.88	92.67	6042.92
FALSE	High	VDEVLSMVPADPFR	[R].VDEVLSMVPADPFR.[L]	1xLabel:13C(6)15N(4) [R14]	1xLabel:13C(6)15N(4) [R14]			8.56291e-05	0	1	1	7	TGGT1_288650-t26_1-p1	transcript=TGGT1_288650-t26_1 | gene=TGGT1_288650 | organism=Toxoplasma_gondii_GT1 | gene_product=dense granule protein GRA12 | transcript_product=dense granule protein GRA12 | location=TGGT1_chrIX:2467879-2469672(-) | protein_length=436 | sequence_SO=chromosome | SO=protein_coding	TGGT1_288650-t26_1-p1 [252-265]	0	1584.8	14
FALSE	High	IVVDNFFTDPVEAR	[R].IVVDNFFTDPVEAR.[R]	1xLabel:13C(6)15N(4) [R14]	1xLabel:13C(6)15N(4) [R14]			0.000114188	0	1	1	1	TGGT1_206510-t26_1-p1	transcript=TGGT1_206510-t26_1 | gene=TGGT1_206510 | organism=Toxoplasma_gondii_GT1 | gene_product=toxolysin TLN4 | transcript_product=toxolysin TLN4 | location=TGGT1_chrVIIa:879451-893239(+) | protein_length=2435 | sequence_SO=chromosome | SO=protein_coding	TGGT1_206510-t26_1-p1 [1638-1651]	0	1631.83	14	1.377	0.849	0.46	-0.24	0.197356	0.719343	0.634058	0.800461	3.3	89.48	1.377	3.792	1.346	0.138	0.849	96.33	0.46	1.92	0.43	-2.86	-0.24	6.59	3958.1	8169.63	9940.81	11843.1	31	42.01	36.02	167.96	5933.7
FALSE	High	VDEVLSMVPADPFR	[R].VDEVLSMVPADPFR.[L]	1xOxidation [M7]	1xOxidation [M7]			1.60157e-05	0	1	1	14	TGGT1_288650-t26_1-p1	transcript=TGGT1_288650-t26_1 | gene=TGGT1_288650 | organism=Toxoplasma_gondii_GT1 | gene_product=dense granule protein GRA12 | transcript_product=dense granule protein GRA12 | location=TGGT1_chrIX:2467879-2469672(-) | protein_length=436 | sequence_SO=chromosome | SO=protein_coding	TGGT1_288650-t26_1-p1 [252-265]	0	1590.78	14	1.04	0.912	0.06	-0.13	0.52489	0.104402	0.79801	0.393776	12.36	6.48	0.953	1.127	1.04	0.912	0.96	0.854	-0.07	0.17	0.06	-0.13	-0.06	-0.23	606523	578058	1.58048e+06	1517451	26.98	24.2	31.68	26.33	606523
FALSE	High	TFSSSTLDLQPSAGLAR	[R].TFSSSTLDLQPSAGLAR.[S]	1xPhospho [S/T]; 1xLabel:13C(6)15N(4) [R17]	1xPhospho [T1; S3; S4; S5; T6]; 1xLabel:13C(6)15N(4) [R17]	TGGT1_298020-t26_1-p1 1xPhospho [S/T]	TGGT1_298020-t26_1-p1 1xPhospho [T180; S182; S183; S184; T185]	4.27668e-05	0	1	1	34	TGGT1_298020-t26_1-p1	transcript=TGGT1_298020-t26_1 | gene=TGGT1_298020 | organism=Toxoplasma_gondii_GT1 | gene_product=DEAD-family helicase | transcript_product=DEAD-family helicase | location=TGGT1_chrII:2173899-2186012(+) | protein_length=1158 | sequence_SO=chromosome | SO=protein_coding	TGGT1_298020-t26_1-p1 [180-196]	0	1840.87	17	14.126	0.721	3.82	-0.47	0.00187154	0.43064	0.205517	0.62065	1.17	75.99	14.126	14.237	10.192	0.01	0.721	1.441	3.82	3.83	3.35	-6.64	-0.47	0.53	190838	2.69569e+06	72398.6	6777.04	50.23	31.75	78.88	143.24	190838
FALSE	High	SDEYFYEHIEANDGAVHLR	[R].SDEYFYEHIEANDGAVHLR.[G]	1xLabel:13C(6)15N(4) [R19]	1xLabel:13C(6)15N(4) [R19]			4.49386e-05	0	1	1	1	TGGT1_310750-t26_1-p1	transcript=TGGT1_310750-t26_1 | gene=TGGT1_310750 | organism=Toxoplasma_gondii_GT1 | gene_product=emp24/gp25L/p24 family protein | transcript_product=emp24/gp25L/p24 family protein | location=TGGT1_chrXI:1533084-1537096(+) | protein_length=601 | sequence_SO=chromosome | SO=protein_coding	TGGT1_310750-t26_1-p1 [431-449]	0	2275.03	19	3.107	1.046	1.64	0.06	0.0738387	0.68624	0.463734	0.778119	56.67	62.49	6.385	1.919	3.107	1.046	3.097	0.605	2.67	0.94	1.64	0.06	1.63	-0.72	2079.52	8765.24	11155.8	11667.5	53.1	40.8	171.27	168.76	2079.52
FALSE	High	VDFDFEEEPLGNDKEGNPVFLR	[R].VDFDFEEEPLGNDKEGNPVFLR.[D]	1xLabel:13C(6)15N(2) [K14]; 1xLabel:13C(6)15N(4) [R22]	1xLabel:13C(6)15N(2) [K14]; 1xLabel:13C(6)15N(4) [R22]			0.000214647	0	1	1	4	TGGT1_226730-t26_1-p1	transcript=TGGT1_226730-t26_1 | gene=TGGT1_226730 | organism=Toxoplasma_gondii_GT1 | gene_product=aconitate hydratase ACN/IRP | transcript_product=aconitate hydratase ACN/IRP | location=TGGT1_chrX:1308814-1316049(-) | protein_length=1055 | sequence_SO=chromosome | SO=protein_coding	TGGT1_226730-t26_1-p1 [724-745]	1	2584.23	22
FALSE	High	LVVLSEMPAEFSVDELKK	[K].LVVLSEMPAEFSVDELKK.[A]					6.39894e-05	0	1	1	2	TGGT1_243960-t26_1-p1	transcript=TGGT1_243960-t26_1 | gene=TGGT1_243960 | organism=Toxoplasma_gondii_GT1 | gene_product=nuclear transport factor 2 (ntf2) domain-containing protein | transcript_product=nuclear transport factor 2 (ntf2) domain-containing protein | location=TGGT1_chrVI:2828443-2833407(-) | protein_length=797 | sequence_SO=chromosome | SO=protein_coding	TGGT1_243960-t26_1-p1 [585-602]	1	2034.08	18	0.684	1.431	-0.55	0.52	0.158729	0.516294	0.603669	0.661856	5.57	23.38	0.305	0.684	0.739	0.01	1.657	1.431	-1.71	-0.55	-0.44	-6.64	0.73	0.52	11697.5	5353.02	227323	376694	29.23	47.02	101.87	122.02	11697.5
FALSE	High	SDEYFYEHIEANDGAVHLR	[R].SDEYFYEHIEANDGAVHLR.[G]					4.30169e-05	0	1	1	2	TGGT1_310750-t26_1-p1	transcript=TGGT1_310750-t26_1 | gene=TGGT1_310750 | organism=Toxoplasma_gondii_GT1 | gene_product=emp24/gp25L/p24 family protein | transcript_product=emp24/gp25L/p24 family protein | location=TGGT1_chrXI:1533084-1537096(+) | protein_length=601 | sequence_SO=chromosome | SO=protein_coding	TGGT1_310750-t26_1-p1 [431-449]	0	2265.02	19
FALSE	High	LVVPEDSFPSSSSLYHR	[K].LVVPEDSFPSSSSLYHR.[I]					1.35317e-05	0	1	1	2	TGGT1_247220-t26_1-p1	transcript=TGGT1_247220-t26_1 | gene=TGGT1_247220 | organism=Toxoplasma_gondii_GT1 | gene_product=nudix -type motif 9 isoform a family protein | transcript_product=nudix -type motif 9 isoform a family protein | location=TGGT1_chrXII:3108760-3111719(-) | protein_length=546 | sequence_SO=chromosome | SO=protein_coding	TGGT1_247220-t26_1-p1 [103-119]	0	1919.95	17
FALSE	High	FLDPIDELPEPFK	[R].FLDPIDELPEPFK.[A]	1xLabel:13C(6)15N(2) [K13]	1xLabel:13C(6)15N(2) [K13]			6.28932e-05	0	1	1	7	TGGT1_216650-t26_1-p1	transcript=TGGT1_216650-t26_1 | gene=TGGT1_216650 | organism=Toxoplasma_gondii_GT1 | gene_product=S15 sporozoite-expressed protein | transcript_product=S15 sporozoite-expressed protein | location=TGGT1_chrXI:5902644-5904672(-) | protein_length=400 | sequence_SO=chromosome | SO=protein_coding	TGGT1_216650-t26_1-p1 [58-70]	0	1567.81	13	0.036	0.01	-4.81	-6.64	0.00821575	0.180987	0.234572	0.500564	0.09	0	0.056	0.036	0.019	0.01	0.01	0.931	-4.15	-4.81	-5.69	-6.64	-6.64	-0.1	148524	7483.79	1.47924e+06	10380.3	86.13	35.43	86.58	38.65	132762
FALSE	High	VDEVLSMVPADPFR	[R].VDEVLSMVPADPFR.[L]	1xOxidation [M7]; 1xLabel:13C(6)15N(4) [R14]	1xOxidation [M7]; 1xLabel:13C(6)15N(4) [R14]			2.5083e-05	0	1	1	14	TGGT1_288650-t26_1-p1	transcript=TGGT1_288650-t26_1 | gene=TGGT1_288650 | organism=Toxoplasma_gondii_GT1 | gene_product=dense granule protein GRA12 | transcript_product=dense granule protein GRA12 | location=TGGT1_chrIX:2467879-2469672(-) | protein_length=436 | sequence_SO=chromosome | SO=protein_coding	TGGT1_288650-t26_1-p1 [252-265]	0	1600.79	14
FALSE	High	TFIIVVTNPLDCMVK	[K].TFIIVVTNPLDCMVK.[V]					2.31649e-05	0	1	1	5	TGGT1_232350-t26_1-p1	transcript=TGGT1_232350-t26_1 | gene=TGGT1_232350 | organism=Toxoplasma_gondii_GT1 | gene_product=lactate dehydrogenase LDH1 | transcript_product=lactate dehydrogenase LDH1 | location=TGGT1_chrVIII:2023599-2025126(+) | protein_length=329 | sequence_SO=chromosome | SO=protein_coding	TGGT1_232350-t26_1-p1 [126-140]	0	1692.91	15	2.617	0.939	1.39	-0.09	0.400074	0.861532	0.740307	0.905489	117.31	3.28	2.617	0.546	11.378	0.939	0.916	1.12	1.39	-0.87	3.51	-0.09	-0.13	0.16	5013.89	6579.4	732756	670869	74.16	66.32	101.98	102.72	5013.89
FALSE	High	LPLPANIEAASSGFESVDQVFR	[K].LPLPANIEAASSGFESVDQVFR.[F]					5.16791e-09	0	2	2	7	TGGT1_277270-t26_1-p1; TGGT1_360830-t26_1-p1	transcript=TGGT1_277270-t26_1 | gene=TGGT1_277270 | organism=Toxoplasma_gondii_GT1 | gene_product=NTPase II | transcript_product=NTPase II | location=AAQM03000418:1-4939(+) | protein_length=862 | sequence_SO=contig | SO=protein_coding transcript=TGGT1_360830-t26_1 | gene=TGGT1_360830 | organism=Toxoplasma_gondii_GT1 | gene_product=nucleoside-triphosphatase | transcript_product=nucleoside-triphosp…	TGGT1_277270-t26_1-p1 [322-343]; TGGT1_360830-t26_1-p1 [200-221]	0	2347.19	22	0.076	0.948	-3.72	-0.08	0.155572	0.31261	0.599723	0.58739	0.58	6.3	0.025	0.713	0.076	0.747	0.992	0.948	-5.35	-0.49	-3.72	-0.42	-0.01	-0.08	81588.1	11027.8	2635336	1.96937e+06	68.14	83.22	68.69	74.72	81588.1
FALSE	High	LYASSGLTAINDDPSLGCK	[K].LYASSGLTAINDDPSLGCK.[A]	1xLabel:13C(6)15N(2) [K19]	1xLabel:13C(6)15N(2) [K19]			6.02153e-07	0	1	1	2	TGGT1_214940-t26_1-p1	transcript=TGGT1_214940-t26_1 | gene=TGGT1_214940 | organism=Toxoplasma_gondii_GT1 | gene_product=MIC2-associated protein M2AP | transcript_product=MIC2-associated protein M2AP | location=TGGT1_chrX:6494811-6496996(+) | protein_length=330 | sequence_SO=chromosome | SO=protein_coding	TGGT1_214940-t26_1-p1 [209-227]	0	1932.95	19
FALSE	High	SAGVNIIPASTGAAK	[R].SAGVNIIPASTGAAK.[A]					4.53328e-05	0	1	1	23	TGGT1_289690-t26_1-p1	transcript=TGGT1_289690-t26_1 | gene=TGGT1_289690 | organism=Toxoplasma_gondii_GT1 | gene_product=glyceraldehyde-3-phosphate dehydrogenase GAPDH1 | transcript_product=glyceraldehyde-3-phosphate dehydrogenase GAPDH1 | location=TGGT1_chrIX:3189155-3191218(-) | protein_length=489 | sequence_SO=chromosome | SO=protein_coding	TGGT1_289690-t26_1-p1 [352-366]	0	1356.75	15	0.915	0.889	-0.13	-0.17	0.101148	0.00671309	0.52684	0.197599	4.19	0.13	0.915	0.836	0.946	0.913	0.888	0.889	-0.13	-0.26	-0.08	-0.13	-0.17	-0.17	775857	734247	16484178	14639471	90.27	91.55	23.66	22.42	2895302
FALSE	High	SAGGVYLPIESK	[K].SAGGVYLPIESK.[A]	1xLabel:13C(6)15N(2) [K12]	1xLabel:13C(6)15N(2) [K12]			0.000177772	0	1	1	2	TGGT1_273960-t26_1-p1	transcript=TGGT1_273960-t26_1 | gene=TGGT1_273960 | organism=Toxoplasma_gondii_GT1 | gene_product=chaperonin GroS protein | transcript_product=chaperonin GroS protein | location=TGGT1_chrVIII:3141275-3146091(+) | protein_length=374 | sequence_SO=chromosome | SO=protein_coding	TGGT1_273960-t26_1-p1 [188-199]	0	1228.67	12	2.012	0.034	1.01	-4.88	0.902027	0.143666	0.961593	0.461735	139.12	0.08	0.124	2.012	6.545	0.034	0.017	0.658	-3.01	1.01	2.71	-4.88	-5.84	-0.6	5211.74	9528.89	376350	9720.31	123.34	49.37	65.58	166.46	27310.5
FALSE	High	SINPDEAVAYGAAVQAAILK	[R].SINPDEAVAYGAAVQAAILK.[G]					2.81733e-08	0	1	1	17	TGGT1_273760-t26_1-p1	transcript=TGGT1_273760-t26_1 | gene=TGGT1_273760 | organism=Toxoplasma_gondii_GT1 | gene_product=heat shock protein HSP70 | transcript_product=heat shock protein HSP70 | location=TGGT1_chrVIII:3285695-3287698(-) | protein_length=667 | sequence_SO=chromosome | SO=protein_coding	TGGT1_273760-t26_1-p1 [364-383]	0	2001.07	20	0.732	0.809	-0.45	-0.31	0.23501	0.0331107	0.660723	0.236557	14.34	0.89	0.297	0.864	0.732	0.809	0.817	0.705	-1.75	-0.21	-0.45	-0.31	-0.29	-0.5	244563	99766.5	4.92854e+06	4.02472e+06	65.8	87.81	106.24	98.96	244563
FALSE	High	TESGSEEVFTDIAAAK	[K].TESGSEEVFTDIAAAK.[L]					9.08584e-05	0	1	1	2	TGGT1_263870-t26_1-p1	transcript=TGGT1_263870-t26_1 | gene=TGGT1_263870 | organism=Toxoplasma_gondii_GT1 | gene_product=glutamate-tRNA ligase | transcript_product=glutamate-tRNA ligase | location=TGGT1_chrVIIb:247108-256643(-) | protein_length=828 | sequence_SO=chromosome | SO=protein_coding	TGGT1_263870-t26_1-p1 [99-114]	0	1654.78	16	0.091	0.628	-3.46	-0.67	0.0445052	0.342592	0.378089	0.600445	0.11	8.37	0.082	0.322	0.091	0.628	0.718	0.01	-3.6	-1.64	-3.46	-0.67	-0.48	-6.64	48290.6	4449.3	339000	212865	61.97	21.72	72.55	84.19	48290.6
FALSE	High	FASSTAPMIVTGGGMLAAINTLK	[R].FASSTAPMIVTGGGMLAAINTLK.[D]	1xOxidation [M]; 1xLabel:13C(6)15N(2) [K23]	1xOxidation [M8; M15]; 1xLabel:13C(6)15N(2) [K23]			1.28037e-06	0	1	1	2	TGGT1_277270-t26_1-p1	transcript=TGGT1_277270-t26_1 | gene=TGGT1_277270 | organism=Toxoplasma_gondii_GT1 | gene_product=NTPase II | transcript_product=NTPase II | location=AAQM03000418:1-4939(+) | protein_length=862 | sequence_SO=contig | SO=protein_coding	TGGT1_277270-t26_1-p1 [344-366]	0	2275.19	23
FALSE	High	FASSTAPMIVTGGGMLAAINTLK	[R].FASSTAPMIVTGGGMLAAINTLK.[D]	1xOxidation [M8]	1xOxidation [M8]			0.000205488	0	1	1	1	TGGT1_277270-t26_1-p1	transcript=TGGT1_277270-t26_1 | gene=TGGT1_277270 | organism=Toxoplasma_gondii_GT1 | gene_product=NTPase II | transcript_product=NTPase II | location=AAQM03000418:1-4939(+) | protein_length=862 | sequence_SO=contig | SO=protein_coding	TGGT1_277270-t26_1-p1 [344-366]	0	2267.18	23	0.26	3.82	-1.94	1.93	0.20779	0.347857	0.647279	0.600445	7.45	126.25	0.26	0.908	0.067	0.567	3.82	26.535	-1.94	-0.14	-3.9	-0.82	1.93	4.73	8912.11	1058	9371.61	11380.1	54.69	143.09	59.96	161.21	4067.67
FALSE	High	FASSTAPMIVTGGGMLAAINTLK	[R].FASSTAPMIVTGGGMLAAINTLK.[D]	1xLabel:13C(6)15N(2) [K23]	1xLabel:13C(6)15N(2) [K23]			8.00821e-07	0	1	1	4	TGGT1_277270-t26_1-p1	transcript=TGGT1_277270-t26_1 | gene=TGGT1_277270 | organism=Toxoplasma_gondii_GT1 | gene_product=NTPase II | transcript_product=NTPase II | location=AAQM03000418:1-4939(+) | protein_length=862 | sequence_SO=contig | SO=protein_coding	TGGT1_277270-t26_1-p1 [344-366]	0	2259.2	23	3.467	0.807	1.79	-0.31	0.175944	0.280159	0.618047	0.567785	84.88	18	18.077	1.482	3.467	0.657	0.807	1.045	4.18	0.57	1.79	-0.61	-0.31	0.06	5183.67	16414.4	606174	473329	60.73	112.88	126.97	139.05	5183.67
FALSE	High	FASSTAPMIVTGGGMLAAINTLK	[R].FASSTAPMIVTGGGMLAAINTLK.[D]					1.28138e-07	0	1	1	5	TGGT1_277270-t26_1-p1	transcript=TGGT1_277270-t26_1 | gene=TGGT1_277270 | organism=Toxoplasma_gondii_GT1 | gene_product=NTPase II | transcript_product=NTPase II | location=AAQM03000418:1-4939(+) | protein_length=862 | sequence_SO=contig | SO=protein_coding	TGGT1_277270-t26_1-p1 [344-366]	0	2251.18	23
FALSE	High	KSIDAFNFVSQLPEVR	[R].KSIDAFNFVSQLPEVR.[Y]					0.000205488	0	1	1	3	TGGT1_219320-t26_1-p1	transcript=TGGT1_219320-t26_1 | gene=TGGT1_219320 | organism=Toxoplasma_gondii_GT1 | gene_product=acid phosphatase GAP50 | transcript_product=acid phosphatase GAP50 | location=TGGT1_chrXII:907511-910397(-) | protein_length=431 | sequence_SO=chromosome | SO=protein_coding	TGGT1_219320-t26_1-p1 [371-386]	1	1849.98	16	0.326	1.473	-1.62	0.56	0.558926	0.397555	0.815125	0.610639	13.44	62.6	4.246	0.048	0.326	0.851	1.473	100	2.09	-4.37	-1.62	-0.23	0.56	6.64	13047.8	4283.73	319566	544565	73.63	74.61	97.83	41.86	1376.5
FALSE	High	TESFALYIYK	[R].TESFALYIYK.[V]					0.000134867	0	1	1	14	TGGT1_209910-t26_1-p1	transcript=TGGT1_209910-t26_1 | gene=TGGT1_209910 | organism=Toxoplasma_gondii_GT1 | gene_product=histone H2Bv | transcript_product=histone H2Bv | location=TGGT1_chrIb:1562803-1563174(+) | protein_length=123 | sequence_SO=chromosome | SO=protein_coding	TGGT1_209910-t26_1-p1 [31-40]	0	1234.64	10	0.197	0.785	-2.34	-0.35	0.0926421	0.0327347	0.506478	0.235605	0.61	4.81	0.021	0.197	0.218	0.785	0.826	0.7	-5.59	-2.34	-2.2	-0.35	-0.28	-0.51	34761.7	3074.67	3103638	2.43587e+06	118.68	81.56	72.19	63.74	147902
FALSE	High	FASSTAPMFITGR	[R].FASSTAPMFITGR.[E]	1xLabel:13C(6)15N(4) [R13]	1xLabel:13C(6)15N(4) [R13]			0.000175515	0	1	1	10	TGGT1_360830-t26_1-p1	transcript=TGGT1_360830-t26_1 | gene=TGGT1_360830 | organism=Toxoplasma_gondii_GT1 | gene_product=nucleoside-triphosphatase | transcript_product=nucleoside-triphosphatase | location=AAQM03000066:41-1153(+) | protein_length=370 | sequence_SO=contig | SO=protein_coding	TGGT1_360830-t26_1-p1 [222-234]	0	1395.7	13
FALSE	High	FASSTAPMFITGR	[R].FASSTAPMFITGR.[E]					0.000112004	0	1	1	10	TGGT1_360830-t26_1-p1	transcript=TGGT1_360830-t26_1 | gene=TGGT1_360830 | organism=Toxoplasma_gondii_GT1 | gene_product=nucleoside-triphosphatase | transcript_product=nucleoside-triphosphatase | location=AAQM03000066:41-1153(+) | protein_length=370 | sequence_SO=contig | SO=protein_coding	TGGT1_360830-t26_1-p1 [222-234]	0	1385.69	13	2.167	1.076	1.12	0.11	0.198856	0.316452	0.635521	0.587845	47.33	10.82	1.475	2.167	11.828	0.976	1.076	1.155	0.56	1.12	3.56	-0.03	0.11	0.21	2543.54	12025.7	1.21433e+06	1.18555e+06	75.16	52.11	77.57	84.68	2543.54
FALSE	High	SAFVDNIFVHGYDSQSYPVAVVVPNR	[R].SAFVDNIFVHGYDSQSYPVAVVVPNR.[Q]	1xLabel:13C(6)15N(4) [R26]	1xLabel:13C(6)15N(4) [R26]			4.72176e-05	0	1	1	3	TGGT1_310080-t26_1-p1	transcript=TGGT1_310080-t26_1 | gene=TGGT1_310080 | organism=Toxoplasma_gondii_GT1 | gene_product=AMP-binding enzyme domain-containing protein | transcript_product=AMP-binding enzyme domain-containing protein | location=TGGT1_chrXI:1008086-1011664(-) | protein_length=789 | sequence_SO=chromosome | SO=protein_coding	TGGT1_310080-t26_1-p1 [661-686]	0	2890.44	26
FALSE	High	LYSGDGTLTGGDDDMPPLET	[R].LYSGDGTLTGGDDDMPPLET.[-]					3.13904e-06	0	1	1	10	TGGT1_295125-t26_1-p1	transcript=TGGT1_295125-t26_1 | gene=TGGT1_295125 | organism=Toxoplasma_gondii_GT1 | gene_product=rhoptry protein ROP4 | transcript_product=rhoptry protein ROP4 | location=TGGT1_chrIa:1394541-1396277(-) | protein_length=365 | sequence_SO=chromosome | SO=protein_coding	TGGT1_295125-t26_1-p1 [346-365]	0	2053.89	20
FALSE	High	VELQFMYEPTDAAFR	[R].VELQFMYEPTDAAFR.[G]	1xLabel:13C(6)15N(4) [R15]	1xLabel:13C(6)15N(4) [R15]			0.000135596	0	2	2	5	TGGT1_410370-t26_1-p1; TGGT1_279100-t26_1-p1	transcript=TGGT1_410370-t26_1 | gene=TGGT1_410370 | organism=Toxoplasma_gondii_GT1 | gene_product=putative transmembrane protein | transcript_product=putative transmembrane protein | location=AAQM03000265:733-2584(+) | protein_length=435 | sequence_SO=contig | SO=protein_coding transcript=TGGT1_279100-t26_1 | gene=TGGT1_279100 | organism=Toxoplasma_gondii_GT1 | gene_product=hypothetical protein |…	TGGT1_410370-t26_1-p1 [406-420]; TGGT1_279100-t26_1-p1 [406-420]	0	1826.87	15
FALSE	High	SAGVNIIPASTGAAK	[R].SAGVNIIPASTGAAK.[A]	1xLabel:13C(6)15N(2) [K15]	1xLabel:13C(6)15N(2) [K15]			2.35088e-05	0	1	1	26	TGGT1_289690-t26_1-p1	transcript=TGGT1_289690-t26_1 | gene=TGGT1_289690 | organism=Toxoplasma_gondii_GT1 | gene_product=glyceraldehyde-3-phosphate dehydrogenase GAPDH1 | transcript_product=glyceraldehyde-3-phosphate dehydrogenase GAPDH1 | location=TGGT1_chrIX:3189155-3191218(-) | protein_length=489 | sequence_SO=chromosome | SO=protein_coding	TGGT1_289690-t26_1-p1 [352-366]	0	1364.76	15
FALSE	High	SALLDAAQIAGLK	[R].SALLDAAQIAGLK.[C]					9.31881e-05	0	1	1	8	TGGT1_219310-t26_1-p1	transcript=TGGT1_219310-t26_1 | gene=TGGT1_219310 | organism=Toxoplasma_gondii_GT1 | gene_product=DnaK family protein | transcript_product=DnaK family protein | location=TGGT1_chrXII:915528-922343(+) | protein_length=818 | sequence_SO=chromosome | SO=protein_coding	TGGT1_219310-t26_1-p1 [157-169]	0	1270.74	13	0.669	0.723	-0.58	-0.47	0.12099	0.00964045	0.561932	0.199491	1.95	3.85	0.688	0.669	0.329	0.759	0.723	0.679	-0.54	-0.58	-1.6	-0.4	-0.47	-0.56	204503	67339.1	1.56065e+06	1.1289e+06	36.77	47.65	36.75	30.96	205638
FALSE	High	SALLDAAQIAGLK	[R].SALLDAAQIAGLK.[C]	1xLabel:13C(6)15N(2) [K13]	1xLabel:13C(6)15N(2) [K13]			9.1629e-05	0	1	1	6	TGGT1_219310-t26_1-p1	transcript=TGGT1_219310-t26_1 | gene=TGGT1_219310 | organism=Toxoplasma_gondii_GT1 | gene_product=DnaK family protein | transcript_product=DnaK family protein | location=TGGT1_chrXII:915528-922343(+) | protein_length=818 | sequence_SO=chromosome | SO=protein_coding	TGGT1_219310-t26_1-p1 [157-169]	0	1278.75	13
FALSE	High	TESTEEQAFALGPPR	[R].TESTEEQAFALGPPR.[R]	1xLabel:13C(6)15N(4) [R15]	1xLabel:13C(6)15N(4) [R15]			6.47303e-05	0	1	1	4	TGGT1_410370-t26_1-p1	transcript=TGGT1_410370-t26_1 | gene=TGGT1_410370 | organism=Toxoplasma_gondii_GT1 | gene_product=putative transmembrane protein | transcript_product=putative transmembrane protein | location=AAQM03000265:733-2584(+) | protein_length=435 | sequence_SO=contig | SO=protein_coding	TGGT1_410370-t26_1-p1 [59-73]	0	1642.79	15
FALSE	High	LPHSHAASSPVAPEAAASSSQAPLYR	[R].LPHSHAASSPVAPEAAASSSQAPLYR.[S]	1xLabel:13C(6)15N(4) [R26]	1xLabel:13C(6)15N(4) [R26]			0.00014346	0	1	1	2	TGGT1_235020-t26_1-p1	transcript=TGGT1_235020-t26_1 | gene=TGGT1_235020 | organism=Toxoplasma_gondii_GT1 | gene_product=putative COPI protein | transcript_product=putative COPI protein | location=TGGT1_chrX:4501792-4518157(-) | protein_length=1256 | sequence_SO=chromosome | SO=protein_coding	TGGT1_235020-t26_1-p1 [995-1020]	0	2612.31	26
FALSE	High	LPHSHAASSPVAPEAAASSSQAPLYR	[R].LPHSHAASSPVAPEAAASSSQAPLYR.[S]					5.28789e-05	0	1	1	2	TGGT1_235020-t26_1-p1	transcript=TGGT1_235020-t26_1 | gene=TGGT1_235020 | organism=Toxoplasma_gondii_GT1 | gene_product=putative COPI protein | transcript_product=putative COPI protein | location=TGGT1_chrX:4501792-4518157(-) | protein_length=1256 | sequence_SO=chromosome | SO=protein_coding	TGGT1_235020-t26_1-p1 [995-1020]	0	2602.3	26	1.362	0.383	0.45	-1.38	0.443112	0.724926	0.760953	0.804677	70.26	21	1.362	0.717	7.675	0.383	15.981	0.014	0.45	-0.48	2.94	-1.38	4	-6.18	2637.66	5016.87	13655.1	5233.47	111.64	34.84	160.11	70.24	2637.66
FALSE	High	VELEKPFVLLYDKR	[K].VELEKPFVLLYDKR.[I]					2.13919e-05	0	1	1	9	TGGT1_247550-t26_1-p1	transcript=TGGT1_247550-t26_1 | gene=TGGT1_247550 | organism=Toxoplasma_gondii_GT1 | gene_product=heat shock protein HSP60 | transcript_product=heat shock protein HSP60 | location=TGGT1_chrXII:3342084-3346052(-) | protein_length=575 | sequence_SO=chromosome | SO=protein_coding	TGGT1_247550-t26_1-p1 [235-248]	1	1748.99	14	0.253	0.897	-1.98	-0.16	0.709022	0.400767	0.879735	0.611161	0.81	1.37	0.253	4.738	0.232	0.907	0.897	0.01	-1.98	2.24	-2.11	-0.14	-0.16	-6.64	10215	4272.8	588430	523611	118.82	63.02	88.69	83.93	10215
FALSE	High	LYMAIGEHVVACIPR	[R].LYMAIGEHVVACIPR.[E]	1xOxidation [M3]	1xOxidation [M3]			0.000106559	0	1	1	2	TGGT1_313080-t26_1-p1	transcript=TGGT1_313080-t26_1 | gene=TGGT1_313080 | organism=Toxoplasma_gondii_GT1 | gene_product=hypothetical protein | transcript_product=hypothetical protein | location=TGGT1_chrXI:3049384-3050751(-) | protein_length=455 | sequence_SO=chromosome | SO=protein_coding	TGGT1_313080-t26_1-p1 [254-268]	0	1687.87	15	0.019	0.475	-5.69	-1.08	0.0185748	0.114401	0.276884	0.413513	0	14.34	0.081	0.019	0.019	0.475	0.271	0.74	-3.63	-5.74	-5.69	-1.08	-1.88	-0.43	320310	11028.4	50694.1	13727.2	60.51	34.08	137.41	155.48	152602
FALSE	High	FDEDALTATTNAELADTLGNLVHR	[R].FDEDALTATTNAELADTLGNLVHR.[A]					0.000146554	0	1	1	3	TGGT1_289300-t26_1-p1	transcript=TGGT1_289300-t26_1 | gene=TGGT1_289300 | organism=Toxoplasma_gondii_GT1 | gene_product=methionyl-tRNA synthetase | transcript_product=methionyl-tRNA synthetase | location=TGGT1_chrIX:2966904-2971258(+) | protein_length=976 | sequence_SO=chromosome | SO=protein_coding	TGGT1_289300-t26_1-p1 [608-631]	0	2587.26	24	1.162	1.202	0.22	0.26	0.4872	0.330279	0.782871	0.595765	67.36	13.79	0.634	1.162	20.859	1.202	1.313	0.935	-0.66	0.22	4.38	0.26	0.39	-0.1	8521.5	9898.41	340574	447262	77.56	39.7	106.75	91.03	8648.31
FALSE	High	LPGLLIIDTPGHSSFTNLR	[R].LPGLLIIDTPGHSSFTNLR.[A]	1xLabel:13C(6)15N(4) [R19]	1xLabel:13C(6)15N(4) [R19]			1.2456e-05	0	1	1	3	TGGT1_214270-t26_1-p1	transcript=TGGT1_214270-t26_1 | gene=TGGT1_214270 | organism=Toxoplasma_gondii_GT1 | gene_product=putative translation initiation factor IF-2 | transcript_product=putative translation initiation factor IF-2 | location=TGGT1_chrX:6085732-6096115(-) | protein_length=1146 | sequence_SO=chromosome | SO=protein_coding	TGGT1_214270-t26_1-p1 [612-630]	0	2061.14	19
FALSE	High	LYMVAEPFPDGLADAIEAGQVNAR	[R].LYMVAEPFPDGLADAIEAGQVNAR.[D]					1.45708e-08	0	1	1	9	TGGT1_205470-t26_1-p1	transcript=TGGT1_205470-t26_1 | gene=TGGT1_205470 | organism=Toxoplasma_gondii_GT1 | gene_product=putative translation elongation factor 2 family protein | transcript_product=putative translation elongation factor 2 family protein | location=TGGT1_chrVIIa:1297616-1301283(+) | protein_length=832 | sequence_SO=chromosome | SO=protein_coding	TGGT1_205470-t26_1-p1 [576-599]	0	2547.25	24	0.742	0.815	-0.43	-0.29	0.74776	0.116467	0.89935	0.417787	35.65	11.01	0.742	0.418	1.959	0.815	0.906	0.672	-0.43	-1.26	0.97	-0.29	-0.14	-0.57	7610.17	4041.4	1.25389e+06	1.02209e+06	57.56	35.76	104.37	91.42	8493.06
FALSE	High	LYSGDGTLTGGDDDMPPPET	[R].LYSGDGTLTGGDDDMPPPET.[-]					9.24055e-05	0	1	1	1	TGGT1_295110-t26_1-p1	transcript=TGGT1_295110-t26_1 | gene=TGGT1_295110 | organism=Toxoplasma_gondii_GT1 | gene_product=rhoptry protein ROP7 | transcript_product=rhoptry protein ROP7 | location=AAQM03000462:293-2020(-) | protein_length=575 | sequence_SO=contig | SO=protein_coding	TGGT1_295110-t26_1-p1 [556-575]	0	2037.86	20
FALSE	High	LYMVAEPFPDGLADAIEAGQVNAR	[R].LYMVAEPFPDGLADAIEAGQVNAR.[D]	1xLabel:13C(6)15N(4) [R24]	1xLabel:13C(6)15N(4) [R24]			8.29369e-10	0	1	1	9	TGGT1_205470-t26_1-p1	transcript=TGGT1_205470-t26_1 | gene=TGGT1_205470 | organism=Toxoplasma_gondii_GT1 | gene_product=putative translation elongation factor 2 family protein | transcript_product=putative translation elongation factor 2 family protein | location=TGGT1_chrVIIa:1297616-1301283(+) | protein_length=832 | sequence_SO=chromosome | SO=protein_coding	TGGT1_205470-t26_1-p1 [576-599]	0	2557.26	24
FALSE	High	KRADVDEFPGVAHLVSDEYEQISSEALEAAR	[R].KRADVDEFPGVAHLVSDEYEQISSEALEAAR.[V]					3.22972e-05	0	1	1	2	TGGT1_288720-t26_1-p1	transcript=TGGT1_288720-t26_1 | gene=TGGT1_288720 | organism=Toxoplasma_gondii_GT1 | gene_product=ribosomal protein RPL10 | transcript_product=ribosomal protein RPL10 | location=TGGT1_chrIX:2518172-2520490(-) | protein_length=221 | sequence_SO=chromosome | SO=protein_coding	TGGT1_288720-t26_1-p1 [39-69]	2	3431.67	31	1.071	0.656	0.1	-0.61	0.764322	0.815679	0.906771	0.871329	45.88	10.21	0.74	1.582	1.071	4.815	0.656	0.551	-0.43	0.66	0.1	2.27	-0.61	-0.86	6250.47	9885.52	160563	105289	57.58	59.79	114.88	96.82	4421.62
FALSE	High	LYMVAEPFPDGLADAIEAGQVNAR	[R].LYMVAEPFPDGLADAIEAGQVNAR.[D]	1xOxidation [M3]	1xOxidation [M3]			1.50429e-07	0	1	1	6	TGGT1_205470-t26_1-p1	transcript=TGGT1_205470-t26_1 | gene=TGGT1_205470 | organism=Toxoplasma_gondii_GT1 | gene_product=putative translation elongation factor 2 family protein | transcript_product=putative translation elongation factor 2 family protein | location=TGGT1_chrVIIa:1297616-1301283(+) | protein_length=832 | sequence_SO=chromosome | SO=protein_coding	TGGT1_205470-t26_1-p1 [576-599]	0	2563.25	24	1.191	0.544	0.25	-0.88	0.293737	0.0100626	0.694079	0.199491	15.97	4.62	1.191	2.613	1.063	0.601	0.544	0.485	0.25	1.39	0.09	-0.73	-0.88	-1.04	10989.2	13960.5	518255	308495	12.95	49.45	82.39	72.42	10282.3
FALSE	High	FDDAVGQGMLK	[K].FDDAVGQGMLK.[D]	1xLabel:13C(6)15N(2) [K11]	1xLabel:13C(6)15N(2) [K11]			0.000190326	0	1	1	9	TGGT1_290670-t26_1-p1	transcript=TGGT1_290670-t26_1 | gene=TGGT1_290670 | organism=Toxoplasma_gondii_GT1 | gene_product=leucyl aminopeptidase LAP | transcript_product=leucyl aminopeptidase LAP | location=TGGT1_chrIX:3637150-3642271(+) | protein_length=781 | sequence_SO=chromosome | SO=protein_coding	TGGT1_290670-t26_1-p1 [298-308]	0	1188.58	11
FALSE	High	LPGLLIIDTPGHSSFTNLR	[R].LPGLLIIDTPGHSSFTNLR.[A]					1.03068e-05	0	1	1	4	TGGT1_214270-t26_1-p1	transcript=TGGT1_214270-t26_1 | gene=TGGT1_214270 | organism=Toxoplasma_gondii_GT1 | gene_product=putative translation initiation factor IF-2 | transcript_product=putative translation initiation factor IF-2 | location=TGGT1_chrX:6085732-6096115(-) | protein_length=1146 | sequence_SO=chromosome | SO=protein_coding	TGGT1_214270-t26_1-p1 [612-630]	0	2051.13	19	0.891	85.191	-0.17	6.41	0.531576	0.212242	0.801085	0.520782	66.33	25.77	0.891	1.393	0.262	0.734	85.191	100	-0.17	0.48	-1.93	-0.45	6.41	6.64	12744.6	8164.27	5592.26	285722	39.03	51.54	166.28	64.65	12744.6
FALSE	High	LYNAEALEAEDILK	[K].LYNAEALEAEDILK.[Y]					2.39988e-05	0	1	1	1	TGGT1_244650-t26_1-p1	transcript=TGGT1_244650-t26_1 | gene=TGGT1_244650 | organism=Toxoplasma_gondii_GT1 | gene_product=putative eukaryotic initiation factor-5 | transcript_product=putative eukaryotic initiation factor-5 | location=TGGT1_chrVI:3337752-3341085(+) | protein_length=414 | sequence_SO=chromosome | SO=protein_coding	TGGT1_244650-t26_1-p1 [365-378]	0	1591.82	14	0.755	0.674	-0.41	-0.57	0.364145	0.346221	0.724171	0.600445	35.81	16.01	0.163	1.075	0.755	0.674	0.834	0.016	-2.62	0.1	-0.41	-0.57	-0.26	-6	7814.19	5897.39	7905.87	5328.65	30.49	55.38	169.11	60.94	11984.9
FALSE	High	TEVEDQIANYK	[R].TEVEDQIANYK.[V]					0.000211055	0	1	1	5	TGGT1_231410-t26_1-p1	transcript=TGGT1_231410-t26_1 | gene=TGGT1_231410 | organism=Toxoplasma_gondii_GT1 | gene_product=hypothetical protein | transcript_product=hypothetical protein | location=TGGT1_chrVIII:1401693-1406022(+) | protein_length=571 | sequence_SO=chromosome | SO=protein_coding	TGGT1_231410-t26_1-p1 [340-350]	0	1309.63	11
FALSE	High	FDANERPTPLEIVR	[K].FDANERPTPLEIVR.[R]					0.000147336	0	1	1	5	TGGT1_211260-t26_1-p1	transcript=TGGT1_211260-t26_1 | gene=TGGT1_211260 | organism=Toxoplasma_gondii_GT1 | gene_product=rhoptry kinase family protein ROP26 (incomplete catalytic triad) | transcript_product=rhoptry kinase family protein ROP26 (incomplete catalytic triad) | location=TGGT1_chrIV:1816280-1817587(-) | protein_length=435 | sequence_SO=chromosome | SO=protein_coding	TGGT1_211260-t26_1-p1 [413-426]	0	1656.87	14	1.231	0.963	0.3	-0.05	0.358295	0.38342	0.722652	0.606822	38.87	6.86	1.738	0.909	1.231	0.963	0.697	1.011	0.8	-0.14	0.3	-0.05	-0.52	0.02	44608.2	40530.3	501418	349428	76.35	96.55	55.52	67.86	56853.6
FALSE	High	FDDPSVQSDMK	[K].FDDPSVQSDMK.[H]	1xOxidation [M10]	1xOxidation [M10]			0.0001667	0	1	1	2	TGGT1_273760-t26_1-p1	transcript=TGGT1_273760-t26_1 | gene=TGGT1_273760 | organism=Toxoplasma_gondii_GT1 | gene_product=heat shock protein HSP70 | transcript_product=heat shock protein HSP70 | location=TGGT1_chrVIII:3285695-3287698(-) | protein_length=667 | sequence_SO=chromosome | SO=protein_coding	TGGT1_273760-t26_1-p1 [78-88]	0	1284.54	11	2.147	0.738	1.1	-0.44	0.0492651	0.720217	0.399784	0.801204	19.93	21.8	2.436	1.452	2.147	1.661	0.539	0.738	1.28	0.54	1.1	0.73	-0.89	-0.44	6264.19	12081.5	9108.42	12365.7	45.57	29.19	159.52	154.34	3018.09
FALSE	High	FDGALNVDVTEFQTNLVPYPR	[R].FDGALNVDVTEFQTNLVPYPR.[I]					7.26021e-05	0	1	1	4	TGGT1_316400B-t26_1-p1	transcript=TGGT1_316400B-t26_1 | gene=TGGT1_316400B | organism=Toxoplasma_gondii_GT1 | gene_product=alpha tubulin TUBA1 | transcript_product=alpha tubulin TUBA1 | location=TGGT1_chrXI:5219470-5220918(+) | protein_length=432 | sequence_SO=chromosome | SO=protein_coding	TGGT1_316400B-t26_1-p1 [223-243]	0	2395.19	21
FALSE	High	FASGPVAPYAGLQADR	[R].FASGPVAPYAGLQADR.[D]	1xPhospho [S3]; 1xLabel:13C(6)15N(4) [R16]	1xPhospho [S3]; 1xLabel:13C(6)15N(4) [R16]	TGGT1_212090-t26_1-p1 1xPhospho [S352]	TGGT1_212090-t26_1-p1 1xPhospho [S352]	0.000109554	0	1	1	6	TGGT1_212090-t26_1-p1	transcript=TGGT1_212090-t26_1 | gene=TGGT1_212090 | organism=Toxoplasma_gondii_GT1 | gene_product=hypothetical protein | transcript_product=hypothetical protein | location=TGGT1_chrX:3976691-3978589(-) | protein_length=632 | sequence_SO=chromosome | SO=protein_coding	TGGT1_212090-t26_1-p1 [350-365]	0	1709.79	16	100	5.55	6.64	2.47	0.00417357	0.22192	0.215459	0.527616	0	124.84	100	100	100	11.49	5.55	0.877	6.64	6.64	6.64	3.52	2.47	-0.19	4211.9	798816	8287.01	15259.7	46.46	20.05	71.04	84.33	4211.9
FALSE	High	FASDQFHVRPTLLEQ	[K].FASDQFHVRPTLLEQ.[-]					0.000187012	0	1	1	9	TGGT1_232410-t26_1-p1	transcript=TGGT1_232410-t26_1 | gene=TGGT1_232410 | organism=Toxoplasma_gondii_GT1 | gene_product=PDI family protein | transcript_product=PDI family protein | location=TGGT1_chrVIII:2074655-2076392(-) | protein_length=220 | sequence_SO=chromosome | SO=protein_coding	TGGT1_232410-t26_1-p1 [206-220]	0	1787.91	15	0.881	0.909	-0.18	-0.14	0.0713505	0.514593	0.458699	0.661139	4.6	1.45	0.797	0.881	0.916	0.909	0.898	3.742	-0.33	-0.18	-0.13	-0.14	-0.16	1.9	236684	188707	1.86495e+06	1.69455e+06	37.1	41.58	92.77	92.33	236684
FALSE	High	FALQQNMPLYLSTK	[K].FALQQNMPLYLSTK.[N]					0.000160314	0	1	1	3	TGGT1_313140-t26_1-p1	transcript=TGGT1_313140-t26_1 | gene=TGGT1_313140 | organism=Toxoplasma_gondii_GT1 | gene_product=isocitrate dehydrogenase | transcript_product=isocitrate dehydrogenase | location=TGGT1_chrXI:3095680-3101525(-) | protein_length=621 | sequence_SO=chromosome | SO=protein_coding	TGGT1_313140-t26_1-p1 [369-382]	0	1653.87	14
FALSE	High	SAFQAGGIVGLAEQYK	[R].SAFQAGGIVGLAEQYK.[A]					3.14837e-06	0	1	1	6	TGGT1_232600-t26_1-p1	transcript=TGGT1_232600-t26_1 | gene=TGGT1_232600 | organism=Toxoplasma_gondii_GT1 | gene_product=phospholipase, patatin family protein | transcript_product=phospholipase, patatin family protein | location=TGGT1_chrVIII:2182196-2184854(+) | protein_length=665 | sequence_SO=chromosome | SO=protein_coding	TGGT1_232600-t26_1-p1 [297-312]	0	1638.85	16	11.435	0.807	3.52	-0.31	0.223406	0.0487517	0.657629	0.265316	67.01	1.61	11.435	0.791	16.603	0.794	0.906	0.807	3.52	-0.34	4.05	-0.33	-0.14	-0.31	831.149	9998.45	524094	416015	143.35	19.51	76.09	73.38	831.149
FALSE	High	KTDDAATAEPSNAMSSLTSTR	[R].KTDDAATAEPSNAMSSLTSTR.[E]	1xLabel:13C(6)15N(2) [K1]; 1xLabel:13C(6)15N(4) [R21]	1xLabel:13C(6)15N(2) [K1]; 1xLabel:13C(6)15N(4) [R21]			5.12186e-05	0	1	1	1	TGGT1_249180-t26_1-p1	transcript=TGGT1_249180-t26_1 | gene=TGGT1_249180 | organism=Toxoplasma_gondii_GT1 | gene_product=bifunctional dihydrofolate reductase-thymidylate synthase | transcript_product=bifunctional dihydrofolate reductase-thymidylate synthase | location=TGGT1_chrXII:4294324-4300363(-) | protein_length=610 | sequence_SO=chromosome | SO=protein_coding	TGGT1_249180-t26_1-p1 [253-273]	1	2172.02	21
FALSE	High	VEPVGSEGELWTSGFR	[R].VEPVGSEGELWTSGFR.[I]					3.2392e-05	0	1	1	1	TGGT1_246580-t26_1-p1	transcript=TGGT1_246580-t26_1 | gene=TGGT1_246580 | organism=Toxoplasma_gondii_GT1 | gene_product=hypothetical protein | transcript_product=hypothetical protein | location=TGGT1_chrXII:2793978-2797673(+) | protein_length=383 | sequence_SO=chromosome | SO=protein_coding	TGGT1_246580-t26_1-p1 [193-208]	0	1749.84	16	1.332	11.072	0.41	3.47	0.270983	0.222277	0.683692	0.527616	24.04	136.24	1.116	1.332	3.826	11.072	57.462	0.898	0.16	0.41	1.94	3.47	5.84	-0.16	9669.89	12878.5	13571.5	191753	57.59	8.87	168.52	97.24	12339.6
FALSE	High	FAGFLADPDILTR	[K].FAGFLADPDILTR.[R]	1xLabel:13C(6)15N(4) [R13]	1xLabel:13C(6)15N(4) [R13]			6.85592e-05	0	1	1	6	TGGT1_216000-t26_1-p1	transcript=TGGT1_216000-t26_1 | gene=TGGT1_216000 | organism=Toxoplasma_gondii_GT1 | gene_product=alveolin domain containing intermediate filament IMC3 | transcript_product=alveolin domain containing intermediate filament IMC3 | location=TGGT1_chrXI:6395592-6397208(+) | protein_length=538 | sequence_SO=chromosome | SO=protein_coding	TGGT1_216000-t26_1-p1 [430-442]	0	1445.77	13
FALSE	High	FAGFLADPDILTR	[K].FAGFLADPDILTR.[R]					6.75823e-05	0	1	1	6	TGGT1_216000-t26_1-p1	transcript=TGGT1_216000-t26_1 | gene=TGGT1_216000 | organism=Toxoplasma_gondii_GT1 | gene_product=alveolin domain containing intermediate filament IMC3 | transcript_product=alveolin domain containing intermediate filament IMC3 | location=TGGT1_chrXI:6395592-6397208(+) | protein_length=538 | sequence_SO=chromosome | SO=protein_coding	TGGT1_216000-t26_1-p1 [430-442]	0	1435.76	13	0.324	0.418	-1.63	-1.26	0.0124958	0.08624	0.251092	0.35102	2.23	5.31	0.324	0.278	0.423	0.332	0.418	0.74	-1.63	-1.85	-1.24	-1.59	-1.26	-0.43	480320	203129	4.2925e+06	1.42501e+06	49.35	52.97	52.76	94.13	697112
FALSE	High	VEQFCITTPEESWK	[K].VEQFCITTPEESWK.[M]					6.1106e-05	0	1	1	2	TGGT1_251690-t26_1-p1	transcript=TGGT1_251690-t26_1 | gene=TGGT1_251690 | organism=Toxoplasma_gondii_GT1 | gene_product=putative seryl-tRNA synthetase, cytoplasmic | transcript_product=putative seryl-tRNA synthetase, cytoplasmic | location=TGGT1_chrXII:5452731-5454179(+) | protein_length=482 | sequence_SO=chromosome | SO=protein_coding	TGGT1_251690-t26_1-p1 [322-335]	0	1696.79	14
FALSE	High	SAFLEHMTYFLVR	[R].SAFLEHMTYFLVR.[T]					0.000172391	0	1	1	1	TGGT1_268835-t26_1-p1	transcript=TGGT1_268835-t26_1 | gene=TGGT1_268835 | organism=Toxoplasma_gondii_GT1 | gene_product=hypothetical protein | transcript_product=hypothetical protein | location=TGGT1_chrVIII:6256688-6265329(+) | protein_length=669 | sequence_SO=chromosome | SO=protein_coding	TGGT1_268835-t26_1-p1 [366-378]	0	1613.81	13	3.336	0.967	1.74	-0.05	0.146206	0.469272	0.588308	0.634381	80.79	10.16	3.336	11.147	1.518	6.092	0.967	0.896	1.74	3.48	0.6	2.61	-0.05	-0.16	2345.32	11683.7	5854.2	10671.1	95.23	21.54	167.61	160.19	2345.32
FALSE	High	FAEPNTIDVAPGFDQEAAAVLMTR	[R].FAEPNTIDVAPGFDQEAAAVLMTR.[L]	1xLabel:13C(6)15N(4) [R24]	1xLabel:13C(6)15N(4) [R24]			2.41406e-05	0	1	1	1	TGGT1_291680-t26_1-p1	transcript=TGGT1_291680-t26_1 | gene=TGGT1_291680 | organism=Toxoplasma_gondii_GT1 | gene_product=Sec23/Sec24 trunk domain-containing protein | transcript_product=Sec23/Sec24 trunk domain-containing protein | location=TGGT1_chrIX:4131104-4145209(-) | protein_length=791 | sequence_SO=chromosome | SO=protein_coding	TGGT1_291680-t26_1-p1 [520-543]	0	2573.26	24
FALSE	High	FAEPNTIDVAPGFDQEAAAVLMTR	[R].FAEPNTIDVAPGFDQEAAAVLMTR.[L]					3.72867e-06	0	1	1	1	TGGT1_291680-t26_1-p1	transcript=TGGT1_291680-t26_1 | gene=TGGT1_291680 | organism=Toxoplasma_gondii_GT1 | gene_product=Sec23/Sec24 trunk domain-containing protein | transcript_product=Sec23/Sec24 trunk domain-containing protein | location=TGGT1_chrIX:4131104-4145209(-) | protein_length=791 | sequence_SO=chromosome | SO=protein_coding	TGGT1_291680-t26_1-p1 [520-543]	0	2563.25	24	3.885	0.013	1.96	-6.27	0.0993287	0.136823	0.524659	0.451004	39.81	0.01	1.439	4.928	3.885	0.013	0.01	0.577	0.52	2.3	1.96	-6.27	-6.62	-0.79	3512.88	13646.7	650022	11339.4	95.97	50.06	41.15	161.29	9742.6
FALSE	High	FAENVGHHSEK	[K].FAENVGHHSEK.[A]	1xLabel:13C(6)15N(2) [K11]	1xLabel:13C(6)15N(2) [K11]			6.83627e-05	0	1	1	18	TGGT1_227620-t26_1-p1	transcript=TGGT1_227620-t26_1 | gene=TGGT1_227620 | organism=Toxoplasma_gondii_GT1 | gene_product=dense granule protein GRA2 | transcript_product=dense granule protein GRA2 | location=TGGT1_chrX:779857-780655(-) | protein_length=185 | sequence_SO=chromosome | SO=protein_coding	TGGT1_227620-t26_1-p1 [89-99]	0	1262.6	11
FALSE	High	FAENVGHHSEK	[K].FAENVGHHSEK.[A]					4.48079e-05	0	1	1	26	TGGT1_227620-t26_1-p1	transcript=TGGT1_227620-t26_1 | gene=TGGT1_227620 | organism=Toxoplasma_gondii_GT1 | gene_product=dense granule protein GRA2 | transcript_product=dense granule protein GRA2 | location=TGGT1_chrX:779857-780655(-) | protein_length=185 | sequence_SO=chromosome | SO=protein_coding	TGGT1_227620-t26_1-p1 [89-99]	0	1254.59	11	0.896	0.911	-0.16	-0.13	0.280209	0.385017	0.691377	0.606822	0.55	17.74	0.896	0.892	1.024	0.513	0.911	1.042	-0.16	-0.16	0.03	-0.96	-0.13	0.06	2.27615e+06	2.24061e+06	8.24742e+06	7.2714e+06	16.96	19.43	32.94	60.49	1.78388e+06
FALSE	High	KTFHPEEVSAMVLGK	[K].KTFHPEEVSAMVLGK.[M]					8.99434e-06	0	1	1	1	TGGT1_273760-t26_1-p1	transcript=TGGT1_273760-t26_1 | gene=TGGT1_273760 | organism=Toxoplasma_gondii_GT1 | gene_product=heat shock protein HSP70 | transcript_product=heat shock protein HSP70 | location=TGGT1_chrVIII:3285695-3287698(-) | protein_length=667 | sequence_SO=chromosome | SO=protein_coding	TGGT1_273760-t26_1-p1 [113-127]	1	1672.87	15	0.616	0.659	-0.7	-0.6	0.916143	0.00608305	0.967206	0.197599	5.97	2.44	2.479	0.616	0.551	0.659	0.61	0.684	1.31	-0.7	-0.86	-0.6	-0.71	-0.55	11631.8	6406.49	10856.1	7156.12	68.22	26.57	169.95	170.17	2420.79
FALSE	High	TEQDLLFDIDQVYK	[R].TEQDLLFDIDQVYK.[N]					0.000148122	0	1	1	1	TGGT1_268870-t26_1-p1	transcript=TGGT1_268870-t26_1 | gene=TGGT1_268870 | organism=Toxoplasma_gondii_GT1 | gene_product=tetratricopeptide repeat-containing protein | transcript_product=tetratricopeptide repeat-containing protein | location=TGGT1_chrVIII:6237449-6244209(+) | protein_length=1031 | sequence_SO=chromosome | SO=protein_coding	TGGT1_268870-t26_1-p1 [520-533]	0	1726.85	14	3.246	0.199	1.7	-2.33	0.580251	0.189532	0.824279	0.505289	3.75	5.48	0.38	3.246	3.328	0.555	0.199	0.013	-1.4	1.7	1.73	-0.85	-2.33	-6.22	2702.99	8172.21	23534.8	6861.11	58.32	53.78	163.01	46.95	6498.58
FALSE	High	TEMLLTMGDLGLPIEK	[R].TEMLLTMGDLGLPIEK.[H]					3.0456e-05	0	1	1	1	TGGT1_273490-t26_1-p1	transcript=TGGT1_273490-t26_1 | gene=TGGT1_273490 | organism=Toxoplasma_gondii_GT1 | gene_product=putative glutamine synthetase, type I | transcript_product=putative glutamine synthetase, type I | location=TGGT1_chrVIII:3443164-3448518(+) | protein_length=479 | sequence_SO=chromosome | SO=protein_coding	TGGT1_273490-t26_1-p1 [204-219]	0	1760.92	16	0.675	0.874	-0.57	-0.19	0.302321	0.424737	0.695304	0.618828	35.81	33.36	0.675	0.242	1.033	0.874	0.326	1.132	-0.57	-2.04	0.05	-0.19	-1.62	0.18	7990.82	5395.72	9237.43	7903.9	23.4	44.7	167	169.89	7990.82
FALSE	High	KTDDAATAEPSNAMSSLTSTR	[R].KTDDAATAEPSNAMSSLTSTR.[E]					1.91787e-05	0	1	1	4	TGGT1_249180-t26_1-p1	transcript=TGGT1_249180-t26_1 | gene=TGGT1_249180 | organism=Toxoplasma_gondii_GT1 | gene_product=bifunctional dihydrofolate reductase-thymidylate synthase | transcript_product=bifunctional dihydrofolate reductase-thymidylate synthase | location=TGGT1_chrXII:4294324-4300363(-) | protein_length=610 | sequence_SO=chromosome | SO=protein_coding	TGGT1_249180-t26_1-p1 [253-273]	1	2154	21	2.686	0.492	1.43	-1.02	0.203661	0.0205389	0.641897	0.208231	93.23	4.6	0.997	2.686	4.702	0.555	0.492	0.383	0	1.43	2.23	-0.85	-1.02	-1.39	2952.86	12985.6	224568	124698	99.74	39.95	86.34	85.19	13025.1
FALSE	High	FALVVHDEQTSNQALR	[R].FALVVHDEQTSNQALR.[F]					1.55953e-05	0	1	1	4	TGGT1_222860-t26_1-p1	transcript=TGGT1_222860-t26_1 | gene=TGGT1_222860 | organism=Toxoplasma_gondii_GT1 | gene_product=putative eukaryotic translation initiation factor | transcript_product=putative eukaryotic translation initiation factor | location=TGGT1_chrII:1241196-1252687(-) | protein_length=756 | sequence_SO=chromosome | SO=protein_coding	TGGT1_222860-t26_1-p1 [504-519]	0	1827.93	16	32.962	13.665	5.04	3.77	0.0329228	0.214368	0.337212	0.521713	15.01	139.19	29.624	32.962	100	27.74	13.665	0.836	4.89	5.04	6.64	4.79	3.77	-0.26	5064.71	322434	12670.5	349017	87.43	34.68	167.19	79.4	10884.3
FALSE	High	FALVVHDEQTSNQALR	[R].FALVVHDEQTSNQALR.[F]	1xLabel:13C(6)15N(4) [R16]	1xLabel:13C(6)15N(4) [R16]			4.42889e-05	0	1	1	3	TGGT1_222860-t26_1-p1	transcript=TGGT1_222860-t26_1 | gene=TGGT1_222860 | organism=Toxoplasma_gondii_GT1 | gene_product=putative eukaryotic translation initiation factor | transcript_product=putative eukaryotic translation initiation factor | location=TGGT1_chrII:1241196-1252687(-) | protein_length=756 | sequence_SO=chromosome | SO=protein_coding	TGGT1_222860-t26_1-p1 [504-519]	0	1837.94	16
FALSE	High	FANLADMFVNDAFGTAHR	[K].FANLADMFVNDAFGTAHR.[A]					1.90622e-06	0	1	1	2	TGGT1_222020-t26_1-p1	transcript=TGGT1_222020-t26_1 | gene=TGGT1_222020 | organism=Toxoplasma_gondii_GT1 | gene_product=phosphoglycerate kinase PGKII | transcript_product=phosphoglycerate kinase PGKII | location=TGGT1_chrII:744480-749627(+) | protein_length=593 | sequence_SO=chromosome | SO=protein_coding	TGGT1_222020-t26_1-p1 [326-343]	0	1996.93	18	1.607	0.461	0.68	-1.12	0.365028	0.0264842	0.724359	0.222112	75.15	5.78	0.793	2.987	1.607	0.376	0.461	0.583	-0.34	1.58	0.68	-1.41	-1.12	-0.78	5887.2	9463.1	15180.8	6993.98	50.46	17.7	167.5	168.97	10697.3
FALSE	High	VELVVSKEELTTPPQNSILELR	[K].VELVVSKEELTTPPQNSILELR.[V]					6.3439e-05	0	1	1	2	TGGT1_239820-t26_1-p1	transcript=TGGT1_239820-t26_1 | gene=TGGT1_239820 | organism=Toxoplasma_gondii_GT1 | gene_product=D-3-phosphoglycerate dehydrogenase | transcript_product=D-3-phosphoglycerate dehydrogenase | location=TGGT1_chrVI:931789-940557(-) | protein_length=604 | sequence_SO=chromosome | SO=protein_coding	TGGT1_239820-t26_1-p1 [412-433]	1	2494.38	22	1.004	0.77	0.01	-0.38	0.714132	0.372609	0.882263	0.604961	53.43	25.19	2.627	0.642	1.004	0.05	0.77	0.99	1.39	-0.64	0.01	-4.31	-0.38	-0.01	9486.47	9572.38	291803	224586	48.3	28.57	50.99	106.45	3643.83
FALSE	High	VELVVSKEELTTPPQNSILELR	[K].VELVVSKEELTTPPQNSILELR.[V]	1xLabel:13C(6)15N(2) [K7]; 1xLabel:13C(6)15N(4) [R22]	1xLabel:13C(6)15N(2) [K7]; 1xLabel:13C(6)15N(4) [R22]			0.000154528	0	1	1	1	TGGT1_239820-t26_1-p1	transcript=TGGT1_239820-t26_1 | gene=TGGT1_239820 | organism=Toxoplasma_gondii_GT1 | gene_product=D-3-phosphoglycerate dehydrogenase | transcript_product=D-3-phosphoglycerate dehydrogenase | location=TGGT1_chrVI:931789-940557(-) | protein_length=604 | sequence_SO=chromosome | SO=protein_coding	TGGT1_239820-t26_1-p1 [412-433]	1	2512.4	22
FALSE	High	FAQAVEFGDLLVDR	[R].FAQAVEFGDLLVDR.[V]	1xLabel:13C(6)15N(4) [R14]	1xLabel:13C(6)15N(4) [R14]			3.22026e-05	0	1	1	1	TGGT1_292220-t26_1-p1	transcript=TGGT1_292220-t26_1 | gene=TGGT1_292220 | organism=Toxoplasma_gondii_GT1 | gene_product=PCI domain-containing protein | transcript_product=PCI domain-containing protein | location=TGGT1_chrIX:4423653-4430460(+) | protein_length=561 | sequence_SO=chromosome | SO=protein_coding	TGGT1_292220-t26_1-p1 [184-197]	0	1589.82	14	3.256	1.159	1.7	0.21	0.147078	0.479259	0.589373	0.640166	55.98	25.89	4.485	1.16	3.256	1.159	1.361	0.01	2.17	0.21	1.7	0.21	0.45	-6.64	2731.06	9788.42	9685.18	7394.39	89.27	15.16	169.07	49.29	2182.33
FALSE	High	SAFVDNIFVHGYDSQSYPVAVVVPNR	[R].SAFVDNIFVHGYDSQSYPVAVVVPNR.[Q]					6.17361e-06	0	1	1	2	TGGT1_310080-t26_1-p1	transcript=TGGT1_310080-t26_1 | gene=TGGT1_310080 | organism=Toxoplasma_gondii_GT1 | gene_product=AMP-binding enzyme domain-containing protein | transcript_product=AMP-binding enzyme domain-containing protein | location=TGGT1_chrXI:1008086-1011664(-) | protein_length=789 | sequence_SO=chromosome | SO=protein_coding	TGGT1_310080-t26_1-p1 [661-686]	0	2880.43	26	3.474	29.15	1.8	4.87	0.0423545	0.24851	0.369149	0.545161	52.54	145.26	5.687	3.474	2.243	63.49	29.15	0.59	2.51	1.8	1.17	5.99	4.87	-0.76	3385.03	11760.7	9689.62	282453	29.44	15.71	171.08	83.24	2300.75
FALSE	High	FAPEVTAVASPTGENLVAVILDK	[R].FAPEVTAVASPTGENLVAVILDK.[T]	1xLabel:13C(6)15N(2) [K23]	1xLabel:13C(6)15N(2) [K23]			2.1276e-06	0	1	1	2	TGGT1_219540-t26_1-p1	transcript=TGGT1_219540-t26_1 | gene=TGGT1_219540 | organism=Toxoplasma_gondii_GT1 | gene_product=cytosolic tRNA-Ala synthetase | transcript_product=cytosolic tRNA-Ala synthetase | location=TGGT1_chrXII:800723-814444(-) | protein_length=1280 | sequence_SO=chromosome | SO=protein_coding	TGGT1_219540-t26_1-p1 [790-812]	0	2349.28	23
FALSE	High	FAPEVTAVASPTGENLVAVILDK	[R].FAPEVTAVASPTGENLVAVILDK.[T]					0.000105382	0	1	1	4	TGGT1_219540-t26_1-p1	transcript=TGGT1_219540-t26_1 | gene=TGGT1_219540 | organism=Toxoplasma_gondii_GT1 | gene_product=cytosolic tRNA-Ala synthetase | transcript_product=cytosolic tRNA-Ala synthetase | location=TGGT1_chrXII:800723-814444(-) | protein_length=1280 | sequence_SO=chromosome | SO=protein_coding	TGGT1_219540-t26_1-p1 [790-812]	0	2341.26	23	0.789	0.834	-0.34	-0.26	0.786912	0.461317	0.916423	0.631129	18.77	21.24	0.629	3.239	0.789	0.834	0.662	1.163	-0.67	1.7	-0.34	-0.26	-0.6	0.22	11438.2	8040.95	847465	560797	63.87	8.39	85.57	87.55	12789.6
FALSE	High	SAFQAGGIVGLAEQYK	[R].SAFQAGGIVGLAEQYK.[A]	1xLabel:13C(6)15N(2) [K16]	1xLabel:13C(6)15N(2) [K16]			1.08708e-05	0	1	1	3	TGGT1_232600-t26_1-p1	transcript=TGGT1_232600-t26_1 | gene=TGGT1_232600 | organism=Toxoplasma_gondii_GT1 | gene_product=phospholipase, patatin family protein | transcript_product=phospholipase, patatin family protein | location=TGGT1_chrVIII:2182196-2184854(+) | protein_length=665 | sequence_SO=chromosome | SO=protein_coding	TGGT1_232600-t26_1-p1 [297-312]	0	1646.86	16
FALSE	High	FASDQFHVRPTLLEQ	[K].FASDQFHVRPTLLEQ.[-]	1xLabel:13C(6)15N(4) [R9]	1xLabel:13C(6)15N(4) [R9]			0.000132339	0	1	1	9	TGGT1_232410-t26_1-p1	transcript=TGGT1_232410-t26_1 | gene=TGGT1_232410 | organism=Toxoplasma_gondii_GT1 | gene_product=PDI family protein | transcript_product=PDI family protein | location=TGGT1_chrVIII:2074655-2076392(-) | protein_length=220 | sequence_SO=chromosome | SO=protein_coding	TGGT1_232410-t26_1-p1 [206-220]	0	1797.92	15
FALSE	High	VENLYEGPMDDEAAQGIR	[R].VENLYEGPMDDEAAQGIR.[N]					1.92328e-06	0	1	1	5	TGGT1_205470-t26_1-p1	transcript=TGGT1_205470-t26_1 | gene=TGGT1_205470 | organism=Toxoplasma_gondii_GT1 | gene_product=putative translation elongation factor 2 family protein | transcript_product=putative translation elongation factor 2 family protein | location=TGGT1_chrVIIa:1297616-1301283(+) | protein_length=832 | sequence_SO=chromosome | SO=protein_coding	TGGT1_205470-t26_1-p1 [343-360]	0	2006.91	18
FALSE	High	VENNGEQSVLYK	[K].VENNGEQSVLYK.[F]					1.16022e-05	0	1	1	15	TGGT1_308020-t26_1-p1	transcript=TGGT1_308020-t26_1 | gene=TGGT1_308020 | organism=Toxoplasma_gondii_GT1 | gene_product=SAG-related sequence SRS57 | transcript_product=SAG-related sequence SRS57 | location=TGGT1_chrXII:456740-457897(-) | protein_length=385 | sequence_SO=chromosome | SO=protein_coding	TGGT1_308020-t26_1-p1 [154-165]	0	1379.68	12	1.497	0.769	0.58	-0.38	0.334083	0.0148274	0.710623	0.20435	61.8	4.03	0.873	3.302	1.497	0.769	0.804	0.717	-0.2	1.72	0.58	-0.38	-0.31	-0.48	204865	178894	1.91934e+06	1.54303e+06	40.24	98.18	31.31	25.99	204865
FALSE	High	VENNGEQSVLYK	[K].VENNGEQSVLYK.[F]	1xLabel:13C(6)15N(2) [K12]	1xLabel:13C(6)15N(2) [K12]			3.89531e-05	0	1	1	14	TGGT1_308020-t26_1-p1	transcript=TGGT1_308020-t26_1 | gene=TGGT1_308020 | organism=Toxoplasma_gondii_GT1 | gene_product=SAG-related sequence SRS57 | transcript_product=SAG-related sequence SRS57 | location=TGGT1_chrXII:456740-457897(-) | protein_length=385 | sequence_SO=chromosome | SO=protein_coding	TGGT1_308020-t26_1-p1 [154-165]	0	1387.69	12
FALSE	High	LYSRPEEEDEDAEEEEKAPETR	[R].LYSRPEEEDEDAEEEEKAPETR.[T]					2.72377e-05	0	1	1	11	TGGT1_317720-t26_1-p1	transcript=TGGT1_317720-t26_1 | gene=TGGT1_317720 | organism=Toxoplasma_gondii_GT1 | gene_product=putative eukaryotic translation initiation factor 3 subunit 7 | transcript_product=putative eukaryotic translation initiation factor 3 subunit 7 | location=TGGT1_chrIV:2518527-2525070(+) | protein_length=609 | sequence_SO=chromosome | SO=protein_coding	TGGT1_317720-t26_1-p1 [576-597]	1	2651.16	22	0.634	0.618	-0.66	-0.69	0.0237513	0.301483	0.304215	0.57982	6.08	1.14	0.634	0.699	0.541	0.63	0.618	0.015	-0.66	-0.52	-0.89	-0.67	-0.69	-6.04	913222	570438	549244	185730	45.2	56.67	44.04	105.54	899615
FALSE	High	LYSRPEEEDEDAEEEEKAPETR	[R].LYSRPEEEDEDAEEEEKAPETR.[T]	1xLabel:13C(6)15N(2) [K17]; 2xLabel:13C(6)15N(4) [R4; R22]	1xLabel:13C(6)15N(2) [K17]; 2xLabel:13C(6)15N(4) [R4; R22]			0.000151298	0	1	1	4	TGGT1_317720-t26_1-p1	transcript=TGGT1_317720-t26_1 | gene=TGGT1_317720 | organism=Toxoplasma_gondii_GT1 | gene_product=putative eukaryotic translation initiation factor 3 subunit 7 | transcript_product=putative eukaryotic translation initiation factor 3 subunit 7 | location=TGGT1_chrIV:2518527-2525070(+) | protein_length=609 | sequence_SO=chromosome | SO=protein_coding	TGGT1_317720-t26_1-p1 [576-597]	1	2679.19	22
FALSE	High	SINPDEAVAYGAAVQAAILK	[R].SINPDEAVAYGAAVQAAILK.[G]	1xLabel:13C(6)15N(2) [K20]	1xLabel:13C(6)15N(2) [K20]			6.90848e-08	0	1	1	14	TGGT1_273760-t26_1-p1	transcript=TGGT1_273760-t26_1 | gene=TGGT1_273760 | organism=Toxoplasma_gondii_GT1 | gene_product=heat shock protein HSP70 | transcript_product=heat shock protein HSP70 | location=TGGT1_chrVIII:3285695-3287698(-) | protein_length=667 | sequence_SO=chromosome | SO=protein_coding	TGGT1_273760-t26_1-p1 [364-383]	0	2009.08	20
FALSE	High	FANSYSEVQLR	[R].FANSYSEVQLR.[Q]	1xLabel:13C(6)15N(4) [R11]	1xLabel:13C(6)15N(4) [R11]			9.69211e-05	0	1	1	7	TGGT1_273460-t26_1-p1	transcript=TGGT1_273460-t26_1 | gene=TGGT1_273460 | organism=Toxoplasma_gondii_GT1 | gene_product=eukaryotic translation initiation factor 3 subunit 6 interacting protein | transcript_product=eukaryotic translation initiation factor 3 subunit 6 interacting protein | location=TGGT1_chrVIII:3489847-3495730(-) | protein_length=639 | sequence_SO=chromosome | SO=protein_coding	TGGT1_273460-t26_1-p1 [453-463]	0	1323.66	11
FALSE	High	FANSYSEVQLR	[R].FANSYSEVQLR.[Q]					9.69211e-05	0	1	1	8	TGGT1_273460-t26_1-p1	transcript=TGGT1_273460-t26_1 | gene=TGGT1_273460 | organism=Toxoplasma_gondii_GT1 | gene_product=eukaryotic translation initiation factor 3 subunit 6 interacting protein | transcript_product=eukaryotic translation initiation factor 3 subunit 6 interacting protein | location=TGGT1_chrVIII:3489847-3495730(-) | protein_length=639 | sequence_SO=chromosome | SO=protein_coding	TGGT1_273460-t26_1-p1 [453-463]	0	1313.65	11	0.207	0.926	-2.27	-0.11	0.258191	0.441537	0.676843	0.624486	5.76	11.92	0.207	0.02	1.07	0.839	0.926	100	-2.27	-5.63	0.1	-0.25	-0.11	6.64	55571.3	11531	497847	494920	110.99	50.14	86.65	55.53	55571.3
FALSE	High	VENLYEGPMDDEAAQGIR	[R].VENLYEGPMDDEAAQGIR.[N]	1xLabel:13C(6)15N(4) [R18]	1xLabel:13C(6)15N(4) [R18]			1.42486e-06	0	1	1	3	TGGT1_205470-t26_1-p1	transcript=TGGT1_205470-t26_1 | gene=TGGT1_205470 | organism=Toxoplasma_gondii_GT1 | gene_product=putative translation elongation factor 2 family protein | transcript_product=putative translation elongation factor 2 family protein | location=TGGT1_chrVIIa:1297616-1301283(+) | protein_length=832 | sequence_SO=chromosome | SO=protein_coding	TGGT1_205470-t26_1-p1 [343-360]	0	2016.92	18	1.234	0.715	0.3	-0.48	0.149289	0.0320835	0.593033	0.233515	1.64	0.88	1.234	1.221	1.977	0.715	0.833	0.707	0.3	0.29	0.98	-0.48	-0.26	-0.5	7166.48	10899.3	647166	539175	21.85	12.96	114.82	109.97	7166.48
FALSE	High	TDRLEEMDAFLSGTNTANVQAVGDR	[K].TDRLEEMDAFLSGTNTANVQAVGDR.[L]	2xLabel:13C(6)15N(4) [R3; R25]	2xLabel:13C(6)15N(4) [R3; R25]			4.29939e-06	0	1	1	1	TGGT1_290950-t26_1-p1	transcript=TGGT1_290950-t26_1 | gene=TGGT1_290950 | organism=Toxoplasma_gondii_GT1 | gene_product=putative clathrin heavy chain | transcript_product=putative clathrin heavy chain | location=TGGT1_chrIX:3770246-3782423(-) | protein_length=1731 | sequence_SO=chromosome | SO=protein_coding	TGGT1_290950-t26_1-p1 [1219-1243]	1	2730.29	25
FALSE	High	KQEAVIQELK	[R].KQEAVIQELK.[E]	2xLabel:13C(6)15N(2) [K1; K10]	2xLabel:13C(6)15N(2) [K1; K10]			0.000114503	0	1	1	11	TGGT1_250710-t26_1-p1	transcript=TGGT1_250710-t26_1 | gene=TGGT1_250710 | organism=Toxoplasma_gondii_GT1 | gene_product=microneme protein MIC10 | transcript_product=microneme protein MIC10 | location=TGGT1_chrXII:5071359-5071955(+) | protein_length=198 | sequence_SO=chromosome | SO=protein_coding	TGGT1_250710-t26_1-p1 [109-118]	1	1201.71	10	0.876	0.885	-0.19	-0.18	0.0872214	0.110012	0.494758	0.404505	6.89	5.94	0.876	0.794	0.929	0.885	0.777	0.931	-0.19	-0.33	-0.11	-0.18	-0.36	-0.1	416393	387000	1.53676e+06	1.43037e+06	41.01	33.46	19.34	11.07	340951
FALSE	High	FDGDLTHFFEYIPFSDKEHLPR	[R].FDGDLTHFFEYIPFSDKEHLPR.[Y]	1xLabel:13C(6)15N(2) [K17]; 1xLabel:13C(6)15N(4) [R22]	1xLabel:13C(6)15N(2) [K17]; 1xLabel:13C(6)15N(4) [R22]			5.93675e-05	0	1	1	1	TGGT1_315690-t26_1-p1	transcript=TGGT1_315690-t26_1 | gene=TGGT1_315690 | organism=Toxoplasma_gondii_GT1 | gene_product=DnaJ domain-containing protein | transcript_product=DnaJ domain-containing protein | location=TGGT1_chrXI:4848691-4851649(+) | protein_length=294 | sequence_SO=chromosome | SO=protein_coding	TGGT1_315690-t26_1-p1 [161-182]	1	2728.32	22	1.628	0.431	0.7	-1.21	0.486355	0.319714	0.782871	0.590183	100.38	20.4	1.628	11.621	0.526	0.431	0.75	0.01	0.7	3.54	-0.93	-1.21	-0.41	-6.64	7113.47	7927.35	176246	3693.91	86.24	31.14	120.49	162.78	7113.47
FALSE	High	LPIIHQTLGPDYDER	[R].LPIIHQTLGPDYDER.[V]	1xLabel:13C(6)15N(4) [R15]	1xLabel:13C(6)15N(4) [R15]			7.75615e-06	0	1	1	7	TGGT1_243950-t26_1-p1	transcript=TGGT1_243950-t26_1 | gene=TGGT1_243950 | organism=Toxoplasma_gondii_GT1 | gene_product=putative prohibitin | transcript_product=putative prohibitin | location=TGGT1_chrVI:2820162-2822544(+) | protein_length=271 | sequence_SO=chromosome | SO=protein_coding	TGGT1_243950-t26_1-p1 [103-117]	0	1776.92	15
FALSE	High	FEILGMTDAAK	[R].FEILGMTDAAK.[Y]					0.000103063	0	1	1	13	TGGT1_270510-t26_1-p1	transcript=TGGT1_270510-t26_1 | gene=TGGT1_270510 | organism=Toxoplasma_gondii_GT1 | gene_product=asparaginyl-tRNA synthetase (NOB+tRNA synthase) | transcript_product=asparaginyl-tRNA synthetase (NOB+tRNA synthase) | location=TGGT1_chrVIII:5218409-5221722(+) | protein_length=676 | sequence_SO=chromosome | SO=protein_coding	TGGT1_270510-t26_1-p1 [278-288]	0	1195.6	11	0.888	0.845	-0.17	-0.24	0.953621	0.453262	0.98183	0.628577	112.21	3.95	0.888	0.035	22.061	0.845	0.814	100	-0.17	-4.82	4.46	-0.24	-0.3	6.64	7830.34	4692.36	1.53565e+06	1.37644e+06	145.39	160.94	86.59	83.41	5284.99
FALSE	High	VEDDIPEDEVEDDEEDNDDGNA	[R].VEDDIPEDEVEDDEEDNDDGNA.[-]					7.96704e-08	0	1	1	18	TGGT1_313230-t26_1-p1	transcript=TGGT1_313230-t26_1 | gene=TGGT1_313230 | organism=Toxoplasma_gondii_GT1 | gene_product=eukaryotic initiation factor-2, alpha subunit | transcript_product=eukaryotic initiation factor-2, alpha subunit | location=TGGT1_chrXI:3161335-3165437(-) | protein_length=347 | sequence_SO=chromosome | SO=protein_coding	TGGT1_313230-t26_1-p1 [326-347]	0	2477.91	22
FALSE	High	LYEVEFPALTER	[R].LYEVEFPALTER.[Y]					3.85005e-05	0	1	1	8	TGGT1_273460-t26_1-p1	transcript=TGGT1_273460-t26_1 | gene=TGGT1_273460 | organism=Toxoplasma_gondii_GT1 | gene_product=eukaryotic translation initiation factor 3 subunit 6 interacting protein | transcript_product=eukaryotic translation initiation factor 3 subunit 6 interacting protein | location=TGGT1_chrVIII:3489847-3495730(-) | protein_length=639 | sequence_SO=chromosome | SO=protein_coding	TGGT1_273460-t26_1-p1 [96-107]	0	1466.75	12	100	0.916	6.64	-0.13	0.0223447	0.193555	0.296653	0.50843	0	2.72	100	100	39.732	0.916	0.936	0.723	6.64	6.64	5.31	-0.13	-0.1	-0.47	3179.47	336947	683672	639950	106.34	14.19	80.53	65.47	3179.47
FALSE	High	FEGTPTYASLSK	[K].FEGTPTYASLSK.[A]	1xLabel:13C(6)15N(2) [K12]	1xLabel:13C(6)15N(2) [K12]			0.000112314	0	1	1	8	TGGT1_209950-t26_1-p1	transcript=TGGT1_209950-t26_1 | gene=TGGT1_209950 | organism=Toxoplasma_gondii_GT1 | gene_product=putative thioredoxin | transcript_product=putative thioredoxin | location=TGGT1_chrIb:1585569-1589285(-) | protein_length=424 | sequence_SO=chromosome | SO=protein_coding	TGGT1_209950-t26_1-p1 [125-136]	0	1308.66	12	0.819	0.743	-0.29	-0.43	0.710834	0.0637028	0.880629	0.302764	13.62	10.49	0.706	0.819	1.346	0.743	0.851	0.648	-0.5	-0.29	0.43	-0.43	-0.23	-0.63	114126	93437.6	1.29198e+06	1.09993e+06	63.29	96.51	56.98	44.49	90899.4
FALSE	High	FEGSNDYSVLK	[R].FEGSNDYSVLK.[D]	1xLabel:13C(6)15N(2) [K11]	1xLabel:13C(6)15N(2) [K11]			0.000106855	0	1	1	7	TGGT1_318430-t26_1-p1	transcript=TGGT1_318430-t26_1 | gene=TGGT1_318430 | organism=Toxoplasma_gondii_GT1 | gene_product=malate dehydrogenase MDH | transcript_product=malate dehydrogenase MDH | location=TGGT1_chrIV:1282502-1286316(-) | protein_length=511 | sequence_SO=chromosome | SO=protein_coding	TGGT1_318430-t26_1-p1 [255-265]	0	1266.61	11
FALSE	High	FEGSNDYSVLK	[R].FEGSNDYSVLK.[D]					0.000107748	0	1	1	8	TGGT1_318430-t26_1-p1	transcript=TGGT1_318430-t26_1 | gene=TGGT1_318430 | organism=Toxoplasma_gondii_GT1 | gene_product=malate dehydrogenase MDH | transcript_product=malate dehydrogenase MDH | location=TGGT1_chrIV:1282502-1286316(-) | protein_length=511 | sequence_SO=chromosome | SO=protein_coding	TGGT1_318430-t26_1-p1 [255-265]	0	1258.6	11	0.424	0.698	-1.24	-0.52	0.391953	0.411153	0.73634	0.614399	18.23	6.03	0.424	0.134	1.658	0.639	0.698	1.21	-1.24	-2.9	0.73	-0.65	-0.52	0.27	17324.7	7344.47	1.13983e+06	795257	128.57	54.23	39.44	71.87	17324.7
FALSE	High	VEDEELDDDDLDML	[R].VEDEELDDDDLDML.[-]	1xOxidation [M13]	1xOxidation [M13]			4.67176e-06	0	1	1	12	TGGT1_292220-t26_1-p1	transcript=TGGT1_292220-t26_1 | gene=TGGT1_292220 | organism=Toxoplasma_gondii_GT1 | gene_product=PCI domain-containing protein | transcript_product=PCI domain-containing protein | location=TGGT1_chrIX:4423653-4430460(+) | protein_length=561 | sequence_SO=chromosome | SO=protein_coding	TGGT1_292220-t26_1-p1 [548-561]	0	1681.66	14
FALSE	High	FEELNSDLFQK	[K].FEELNSDLFQK.[T]	1xLabel:13C(6)15N(2) [K11]	1xLabel:13C(6)15N(2) [K11]			0.000144229	0	1	1	9	TGGT1_311720-t26_1-p1	transcript=TGGT1_311720-t26_1 | gene=TGGT1_311720 | organism=Toxoplasma_gondii_GT1 | gene_product=chaperonin protein BiP | transcript_product=chaperonin protein BiP | location=TGGT1_chrXI:2188121-2191497(-) | protein_length=668 | sequence_SO=chromosome | SO=protein_coding	TGGT1_311720-t26_1-p1 [335-345]	0	1377.68	11
FALSE	High	FEELNSDLFQK	[K].FEELNSDLFQK.[T]					4.33947e-05	0	1	1	14	TGGT1_311720-t26_1-p1	transcript=TGGT1_311720-t26_1 | gene=TGGT1_311720 | organism=Toxoplasma_gondii_GT1 | gene_product=chaperonin protein BiP | transcript_product=chaperonin protein BiP | location=TGGT1_chrXI:2188121-2191497(-) | protein_length=668 | sequence_SO=chromosome | SO=protein_coding	TGGT1_311720-t26_1-p1 [335-345]	0	1369.66	11	0.021	0.055	-5.55	-4.19	0.00462603	0.150333	0.218713	0.467036	0.02	0.36	0.037	0.021	0.015	0.055	0.01	0.567	-4.76	-5.55	-6.04	-4.19	-6.64	-0.82	212383	5055.59	1.083e+06	33009	88.26	51.2	113.29	169.73	137374
FALSE	High	VEDQDLLPFVGYCR	[K].VEDQDLLPFVGYCR.[I]					2.16458e-05	0	1	1	1	TGGT1_211030-t26_1-p1	transcript=TGGT1_211030-t26_1 | gene=TGGT1_211030 | organism=Toxoplasma_gondii_GT1 | gene_product=hypothetical protein | transcript_product=hypothetical protein | location=TGGT1_chrIV:1889471-1891938(-) | protein_length=191 | sequence_SO=chromosome | SO=protein_coding	TGGT1_211030-t26_1-p1 [7-20]	0	1653.79	14	3.717	0.675	1.89	-0.57	0.118608	0.799023	0.559849	0.859924	60.9	66.31	2.19	3.717	17.761	18.798	0.013	0.675	1.13	1.89	4.15	4.23	-6.32	-0.57	8375.97	32329.7	335164	85746.3	50.71	121.81	144.55	160.86	2742.21
FALSE	High	LPIGDLATQYFADR	[R].LPIGDLATQYFADR.[D]	1xLabel:13C(6)15N(4) [R14]	1xLabel:13C(6)15N(4) [R14]			1.26417e-05	0	1	1	2	TGGT1_297500-t26_1-p1	transcript=TGGT1_297500-t26_1 | gene=TGGT1_297500 | organism=Toxoplasma_gondii_GT1 | gene_product=T-complex protein 1 eta subunit | transcript_product=T-complex protein 1 eta subunit | location=TGGT1_chrII:1806900-1814443(-) | protein_length=546 | sequence_SO=chromosome | SO=protein_coding	TGGT1_297500-t26_1-p1 [295-308]	0	1589.82	14
FALSE	High	IYHPNINSQGAICLDILK	[K].IYHPNINSQGAICLDILK.[D]					2.03452e-05	0	1	1	1	TGGT1_319870-t26_1-p1	transcript=TGGT1_319870-t26_1 | gene=TGGT1_319870 | organism=Toxoplasma_gondii_GT1 | gene_product=ubiquitin-conjugating enzyme subfamily protein | transcript_product=ubiquitin-conjugating enzyme subfamily protein | location=TGGT1_chrIV:656858-661140(-) | protein_length=311 | sequence_SO=chromosome | SO=protein_coding	TGGT1_319870-t26_1-p1 [237-254]	0	2012.06	18
FALSE	High	KPPTVVAYGDVSTVPHYEEVR	[K].KPPTVVAYGDVSTVPHYEEVR.[A]					5.25732e-05	0	1	1	6	TGGT1_202680-t26_1-p1	transcript=TGGT1_202680-t26_1 | gene=TGGT1_202680 | organism=Toxoplasma_gondii_GT1 | gene_product=putative peptidase M16, alpha subunit | transcript_product=putative peptidase M16, alpha subunit | location=TGGT1_chrVIIa:3006392-3012675(-) | protein_length=563 | sequence_SO=chromosome | SO=protein_coding	TGGT1_202680-t26_1-p1 [533-553]	0	2343.2	21	0.309	0.784	-1.69	-0.35	0.297841	0.0934934	0.695044	0.368564	12.5	5.22	1.23	0.309	0.037	0.784	0.829	0.591	0.3	-1.69	-4.75	-0.35	-0.27	-0.76	13884.1	4513.83	740778	614336	128.53	72.78	121.99	107.94	11366.1
FALSE	High	FEEDLVDYISYLK	[R].FEEDLVDYISYLK.[T]					1.87863e-05	0	1	1	1	TGGT1_221950-t26_1-p1	transcript=TGGT1_221950-t26_1 | gene=TGGT1_221950 | organism=Toxoplasma_gondii_GT1 | gene_product=putative splicesome-associated protein | transcript_product=putative splicesome-associated protein | location=TGGT1_chrII:703092-709611(-) | protein_length=559 | sequence_SO=chromosome | SO=protein_coding	TGGT1_221950-t26_1-p1 [224-236]	0	1633.8	13	2.694	0.168	1.43	-2.57	0.280305	0.28373	0.691377	0.569693	100.22	3.87	12.074	2.694	0.873	1.331	0.168	0.013	3.59	1.43	-0.2	0.41	-2.57	-6.32	3182.3	8627.79	22105.1	4840.06	105.56	3.11	154.11	63.31	714.56
FALSE	High	FESGDEGTSTMSPSVAAR	[R].FESGDEGTSTMSPSVAAR.[Q]					1.19153e-05	0	1	1	7	TGGT1_214080-t26_1-p1	transcript=TGGT1_214080-t26_1 | gene=TGGT1_214080 | organism=Toxoplasma_gondii_GT1 | gene_product=toxofilin | transcript_product=toxofilin | location=TGGT1_chrX:5904318-5905055(+) | protein_length=245 | sequence_SO=chromosome | SO=protein_coding	TGGT1_214080-t26_1-p1 [51-68]	0	1828.8	18
FALSE	High	FESGDEGTSTMSPSVAAR	[R].FESGDEGTSTMSPSVAAR.[Q]	1xLabel:13C(6)15N(4) [R18]	1xLabel:13C(6)15N(4) [R18]			7.09643e-06	0	1	1	7	TGGT1_214080-t26_1-p1	transcript=TGGT1_214080-t26_1 | gene=TGGT1_214080 | organism=Toxoplasma_gondii_GT1 | gene_product=toxofilin | transcript_product=toxofilin | location=TGGT1_chrX:5904318-5905055(+) | protein_length=245 | sequence_SO=chromosome | SO=protein_coding	TGGT1_214080-t26_1-p1 [51-68]	0	1838.81	18	0.583	0.825	-0.78	-0.28	0.184383	0.468791	0.622699	0.634256	24.25	5.69	0.302	0.881	0.583	0.825	1.137	0.779	-1.73	-0.18	-0.78	-0.28	0.19	-0.36	7404.2	4864.23	1316167	1.27737e+06	14.78	40.96	43.67	29.9	7404.2
FALSE	High	FESLFIDYINANHQDILK	[R].FESLFIDYINANHQDILK.[T]					4.72752e-06	0	1	1	6	TGGT1_204400-t26_1-p1	transcript=TGGT1_204400-t26_1 | gene=TGGT1_204400 | organism=Toxoplasma_gondii_GT1 | gene_product=putative ATPase synthase subunit alpha | transcript_product=putative ATPase synthase subunit alpha | location=TGGT1_chrVIIa:1716199-1723634(+) | protein_length=577 | sequence_SO=chromosome | SO=protein_coding	TGGT1_204400-t26_1-p1 [516-533]	0	2180.1	18	1.029	0.677	0.04	-0.56	0.872853	0.00831408	0.953076	0.199491	128.95	3.15	0.134	1.029	4.21	0.677	0.728	0.646	-2.9	0.04	2.07	-0.56	-0.46	-0.63	10722.7	5406.51	813131	592322	83.69	69.72	101.16	96.61	17945.8
FALSE	High	FESLFIDYINANHQDILK	[R].FESLFIDYINANHQDILK.[T]	1xLabel:13C(6)15N(2) [K18]	1xLabel:13C(6)15N(2) [K18]			5.53219e-06	0	1	1	6	TGGT1_204400-t26_1-p1	transcript=TGGT1_204400-t26_1 | gene=TGGT1_204400 | organism=Toxoplasma_gondii_GT1 | gene_product=putative ATPase synthase subunit alpha | transcript_product=putative ATPase synthase subunit alpha | location=TGGT1_chrVIIa:1716199-1723634(+) | protein_length=577 | sequence_SO=chromosome | SO=protein_coding	TGGT1_204400-t26_1-p1 [516-533]	0	2188.12	18
FALSE	High	FFLLTVTHDLPIPLK	[R].FFLLTVTHDLPIPLK.[G]	1xLabel:13C(6)15N(2) [K15]	1xLabel:13C(6)15N(2) [K15]			1.80786e-05	0	1	1	3	TGGT1_219850-t26_1-p1	transcript=TGGT1_219850-t26_1 | gene=TGGT1_219850 | organism=Toxoplasma_gondii_GT1 | gene_product=prolyl-tRNA synthetase (ProRS) | transcript_product=prolyl-tRNA synthetase (ProRS) | location=TGGT1_chrXII:529404-538395(-) | protein_length=830 | sequence_SO=chromosome | SO=protein_coding	TGGT1_219850-t26_1-p1 [188-202]	0	1762.04	15	0.944	0.776	-0.08	-0.37	0.481073	0.0557458	0.78094	0.283326	55.7	5.6	0.944	0.083	1.342	0.776	0.825	0.649	-0.08	-3.6	0.42	-0.37	-0.28	-0.62	12949.8	6269.71	931670	723356	46.95	85.72	82.37	69.7	12991
FALSE	High	FFLLTVTHDLPIPLK	[R].FFLLTVTHDLPIPLK.[G]					3.4212e-06	0	1	1	4	TGGT1_219850-t26_1-p1	transcript=TGGT1_219850-t26_1 | gene=TGGT1_219850 | organism=Toxoplasma_gondii_GT1 | gene_product=prolyl-tRNA synthetase (ProRS) | transcript_product=prolyl-tRNA synthetase (ProRS) | location=TGGT1_chrXII:529404-538395(-) | protein_length=830 | sequence_SO=chromosome | SO=protein_coding	TGGT1_219850-t26_1-p1 [188-202]	0	1754.03	15
FALSE	High	FFGPSHHFGGFTPLYDPAPDKR	[R].FFGPSHHFGGFTPLYDPAPDKR.[V]	1xLabel:13C(6)15N(2) [K21]; 1xLabel:13C(6)15N(4) [R22]	1xLabel:13C(6)15N(2) [K21]; 1xLabel:13C(6)15N(4) [R22]			0.000147729	0	2	2	4	TGGT1_220950-t26_1-p1; TGGT1_410360-t26_1-p1	transcript=TGGT1_220950-t26_1 | gene=TGGT1_220950 | organism=Toxoplasma_gondii_GT1 | gene_product=hypothetical protein | transcript_product=hypothetical protein | location=TGGT1_chrII:72817-74397(+) | protein_length=334 | sequence_SO=chromosome | SO=protein_coding transcript=TGGT1_410360-t26_1 | gene=TGGT1_410360 | organism=Toxoplasma_gondii_GT1 | gene_product=putative transmembrane protein | tra…	TGGT1_220950-t26_1-p1 [76-97]; TGGT1_410360-t26_1-p1 [188-209]	1	2508.22	22	7.344	0.859	2.88	-0.22	0.267624	0.342221	0.681628	0.600445	133.75	13.64	7.344	46.221	0.719	0.285	0.859	0.966	2.88	5.53	-0.48	-1.81	-0.22	-0.05	4741.71	28834	465991	400429	91.31	131.43	125.4	131.86	3926.21
FALSE	High	FFGPSHHFGGFTPLYDPAPDKR	[R].FFGPSHHFGGFTPLYDPAPDKR.[V]					4.61314e-05	0	2	2	3	TGGT1_220950-t26_1-p1; TGGT1_410360-t26_1-p1	transcript=TGGT1_220950-t26_1 | gene=TGGT1_220950 | organism=Toxoplasma_gondii_GT1 | gene_product=hypothetical protein | transcript_product=hypothetical protein | location=TGGT1_chrII:72817-74397(+) | protein_length=334 | sequence_SO=chromosome | SO=protein_coding transcript=TGGT1_410360-t26_1 | gene=TGGT1_410360 | organism=Toxoplasma_gondii_GT1 | gene_product=putative transmembrane protein | tra…	TGGT1_220950-t26_1-p1 [76-97]; TGGT1_410360-t26_1-p1 [188-209]	1	2490.2	22
FALSE	High	SLLVVTNDNQYTLSSTPPEAEQTETQR	[R].SLLVVTNDNQYTLSSTPPEAEQTETQR.[E]	1xPhospho [S1]; 1xLabel:13C(6)15N(4) [R27]	1xPhospho [S1]; 1xLabel:13C(6)15N(4) [R27]	TGGT1_240890-t26_1-p1 1xPhospho [S20]	TGGT1_240890-t26_1-p1 1xPhospho [S20]	8.30022e-05	0	1	1	3	TGGT1_240890-t26_1-p1	transcript=TGGT1_240890-t26_1 | gene=TGGT1_240890 | organism=Toxoplasma_gondii_GT1 | gene_product=6-phosphofructokinase | transcript_product=6-phosphofructokinase | location=TGGT1_chrVI:1494349-1507600(+) | protein_length=1399 | sequence_SO=chromosome | SO=protein_coding	TGGT1_240890-t26_1-p1 [20-46]	0	3111.44	27	35.405	0.227	5.15	-2.14	0.0328394	0.144057	0.337212	0.462292	112.22	2.82	35.405	8.606	70.061	0.227	0.809	0.143	5.15	3.11	6.13	-2.14	-0.31	-2.81	12342.5	265744	9251.2	2262.66	29.85	103.22	12.08	80.65	7505.88
FALSE	High	KPEDVTWEEYCAFYK	[R].KPEDVTWEEYCAFYK.[S]					8.06794e-05	0	1	1	3	TGGT1_288380-t26_1-p1	transcript=TGGT1_288380-t26_1 | gene=TGGT1_288380 | organism=Toxoplasma_gondii_GT1 | gene_product=heat shock protein HSP90 | transcript_product=heat shock protein HSP90 | location=TGGT1_chrIX:2294323-2298742(+) | protein_length=708 | sequence_SO=chromosome | SO=protein_coding	TGGT1_288380-t26_1-p1 [277-291]	0	1907.85	15	0.291	0.575	-1.78	-0.8	0.0534639	0.221322	0.412388	0.527616	2.55	0.66	0.558	0.291	0.232	0.567	1.051	0.575	-0.84	-1.78	-2.11	-0.82	0.07	-0.8	13447.1	3914.16	346078	196209	17.36	33.67	125.88	120.04	12066.5
FALSE	High	IYDAIEESDFFVCPVAR	[K].IYDAIEESDFFVCPVAR.[D]	1xLabel:13C(6)15N(4) [R17]	1xLabel:13C(6)15N(4) [R17]			0.000182812	0	1	1	1	TGGT1_218780-t26_1-p1	transcript=TGGT1_218780-t26_1 | gene=TGGT1_218780 | organism=Toxoplasma_gondii_GT1 | gene_product=putative phosphoserine aminotransferase | transcript_product=putative phosphoserine aminotransferase | location=TGGT1_chrXII:1247991-1254054(-) | protein_length=481 | sequence_SO=chromosome | SO=protein_coding	TGGT1_218780-t26_1-p1 [340-356]	0	1983.94	17	3.051	0.576	1.61	-0.8	0.114119	0.298553	0.552341	0.578312	3.76	22.48	3.051	1.238	3.128	0.046	0.839	0.576	1.61	0.31	1.65	-4.43	-0.25	-0.8	4085.31	12499.2	113665	49935.4	18.72	54.36	148.81	159.22	4097.21
FALSE	High	KPPTVVAYGDVSTVPHYEEVR	[K].KPPTVVAYGDVSTVPHYEEVR.[A]	1xLabel:13C(6)15N(2) [K1]; 1xLabel:13C(6)15N(4) [R21]	1xLabel:13C(6)15N(2) [K1]; 1xLabel:13C(6)15N(4) [R21]			0.000148122	0	1	1	3	TGGT1_202680-t26_1-p1	transcript=TGGT1_202680-t26_1 | gene=TGGT1_202680 | organism=Toxoplasma_gondii_GT1 | gene_product=putative peptidase M16, alpha subunit | transcript_product=putative peptidase M16, alpha subunit | location=TGGT1_chrVIIa:3006392-3012675(-) | protein_length=563 | sequence_SO=chromosome | SO=protein_coding	TGGT1_202680-t26_1-p1 [533-553]	0	2361.22	21
FALSE	High	IYDGQLDETLPSPK	[R].IYDGQLDETLPSPK.[L]					0.000165837	0	1	1	1	TGGT1_311890-t26_1-p1	transcript=TGGT1_311890-t26_1 | gene=TGGT1_311890 | organism=Toxoplasma_gondii_GT1 | gene_product=hypothetical protein | transcript_product=hypothetical protein | location=TGGT1_chrXI:2321183-2324126(+) | protein_length=394 | sequence_SO=chromosome | SO=protein_coding	TGGT1_311890-t26_1-p1 [335-348]	0	1575.79	14
FALSE	High	KPGDDAVTMGEGMNYGSLEQQK	[K].KPGDDAVTMGEGMNYGSLEQQK.[K]					3.43479e-05	0	1	1	1	TGGT1_201680-t26_1-p1	transcript=TGGT1_201680-t26_1 | gene=TGGT1_201680 | organism=Toxoplasma_gondii_GT1 | gene_product=putative eukaryotic initiation factor-3 subunit 10 | transcript_product=putative eukaryotic initiation factor-3 subunit 10 | location=TGGT1_chrVIIa:3754116-3762345(+) | protein_length=1031 | sequence_SO=chromosome | SO=protein_coding	TGGT1_201680-t26_1-p1 [362-383]	0	2355.06	22
FALSE	High	VEAAANVFQSLCYQHK	[R].VEAAANVFQSLCYQHK.[D]	1xLabel:13C(6)15N(2) [K16]	1xLabel:13C(6)15N(2) [K16]			9.61098e-05	0	1	1	1	TGGT1_223590-t26_1-p1	transcript=TGGT1_223590-t26_1 | gene=TGGT1_223590 | organism=Toxoplasma_gondii_GT1 | gene_product=proteasome subunit | transcript_product=proteasome subunit | location=TGGT1_chrX:3626728-3628061(-) | protein_length=369 | sequence_SO=chromosome | SO=protein_coding	TGGT1_223590-t26_1-p1 [247-262]	0	1815.89	16	0.611	1.958	-0.71	0.97	0.173206	0.38397	0.618047	0.606822	19.86	96.66	0.392	0.611	0.912	1.958	8.078	0.681	-1.35	-0.71	-0.13	0.97	3.01	-0.55	10762.3	4214.86	38162.6	74704.6	38.1	66.06	162.18	134.15	10762.3
FALSE	High	IYDGQLDETLPSPK	[R].IYDGQLDETLPSPK.[L]	1xLabel:13C(6)15N(2) [K14]	1xLabel:13C(6)15N(2) [K14]			8.80836e-05	0	1	1	2	TGGT1_311890-t26_1-p1	transcript=TGGT1_311890-t26_1 | gene=TGGT1_311890 | organism=Toxoplasma_gondii_GT1 | gene_product=hypothetical protein | transcript_product=hypothetical protein | location=TGGT1_chrXI:2321183-2324126(+) | protein_length=394 | sequence_SO=chromosome | SO=protein_coding	TGGT1_311890-t26_1-p1 [335-348]	0	1583.8	14
FALSE	High	KPGLLSQGLQPTELDLSVMDR	[K].KPGLLSQGLQPTELDLSVMDR.[F]					3.09972e-05	0	1	1	1	TGGT1_278830-t26_1-p1	transcript=TGGT1_278830-t26_1 | gene=TGGT1_278830 | organism=Toxoplasma_gondii_GT1 | gene_product=glucose-6-phosphate 1-dehydrogenase | transcript_product=glucose-6-phosphate 1-dehydrogenase | location=TGGT1_chrXII:5748919-5762087(+) | protein_length=878 | sequence_SO=chromosome | SO=protein_coding	TGGT1_278830-t26_1-p1 [763-783]	0	2297.22	21
FALSE	High	VEAVNLELSEQALR	[K].VEAVNLELSEQALR.[V]					3.59823e-06	0	1	1	2	TGGT1_278660-t26_1-p1	transcript=TGGT1_278660-t26_1 | gene=TGGT1_278660 | organism=Toxoplasma_gondii_GT1 | gene_product=putative P-type ATPase4 | transcript_product=putative P-type ATPase4 | location=TGGT1_chrXII:5863040-5875230(+) | protein_length=1338 | sequence_SO=chromosome | SO=protein_coding	TGGT1_278660-t26_1-p1 [756-769]	0	1570.84	14
FALSE	High	VEAVNLELSEQALR	[K].VEAVNLELSEQALR.[V]	1xLabel:13C(6)15N(4) [R14]	1xLabel:13C(6)15N(4) [R14]			1.12639e-05	0	1	1	2	TGGT1_278660-t26_1-p1	transcript=TGGT1_278660-t26_1 | gene=TGGT1_278660 | organism=Toxoplasma_gondii_GT1 | gene_product=putative P-type ATPase4 | transcript_product=putative P-type ATPase4 | location=TGGT1_chrXII:5863040-5875230(+) | protein_length=1338 | sequence_SO=chromosome | SO=protein_coding	TGGT1_278660-t26_1-p1 [756-769]	0	1580.85	14	2.854	12.941	1.51	3.69	0.508939	0.193553	0.792298	0.50843	132.13	135.93	2.854	20.17	0.311	12.941	1.076	54.336	1.51	4.33	-1.69	3.69	0.11	5.76	3495.48	9976.35	11823.5	12723.5	93.15	62.44	77.23	164.02	3495.48
FALSE	High	KPGLLSQGLQPTELDLSVMDR	[K].KPGLLSQGLQPTELDLSVMDR.[F]	1xLabel:13C(6)15N(2) [K1]; 1xLabel:13C(6)15N(4) [R21]	1xLabel:13C(6)15N(2) [K1]; 1xLabel:13C(6)15N(4) [R21]			6.49168e-05	0	1	1	1	TGGT1_278830-t26_1-p1	transcript=TGGT1_278830-t26_1 | gene=TGGT1_278830 | organism=Toxoplasma_gondii_GT1 | gene_product=glucose-6-phosphate 1-dehydrogenase | transcript_product=glucose-6-phosphate 1-dehydrogenase | location=TGGT1_chrXII:5748919-5762087(+) | protein_length=878 | sequence_SO=chromosome | SO=protein_coding	TGGT1_278830-t26_1-p1 [763-783]	0	2315.24	21	1.657	0.838	0.73	-0.25	0.463731	0.314707	0.771359	0.587482	88.59	6.74	1.657	0.667	2.809	0.232	0.892	0.838	0.73	-0.58	1.49	-2.11	-0.16	-0.25	5503.42	8971.45	12137.6	5095.97	73.55	1.99	169.22	171.08	5503.42
FALSE	High	VEAAANVFQSLCYQHK	[R].VEAAANVFQSLCYQHK.[D]					1.57342e-05	0	1	1	3	TGGT1_223590-t26_1-p1	transcript=TGGT1_223590-t26_1 | gene=TGGT1_223590 | organism=Toxoplasma_gondii_GT1 | gene_product=proteasome subunit | transcript_product=proteasome subunit | location=TGGT1_chrX:3626728-3628061(-) | protein_length=369 | sequence_SO=chromosome | SO=protein_coding	TGGT1_223590-t26_1-p1 [247-262]	0	1807.88	16
FALSE	High	FDGDLTHFFEYIPFSDKEHLPR	[R].FDGDLTHFFEYIPFSDKEHLPR.[Y]					1.83476e-05	0	1	1	2	TGGT1_315690-t26_1-p1	transcript=TGGT1_315690-t26_1 | gene=TGGT1_315690 | organism=Toxoplasma_gondii_GT1 | gene_product=DnaJ domain-containing protein | transcript_product=DnaJ domain-containing protein | location=TGGT1_chrXI:4848691-4851649(+) | protein_length=294 | sequence_SO=chromosome | SO=protein_coding	TGGT1_315690-t26_1-p1 [161-182]	1	2710.29	22
FALSE	High	TFHPEEVSAMVLGK	[K].TFHPEEVSAMVLGK.[M]					0.000213617	0	1	1	17	TGGT1_273760-t26_1-p1	transcript=TGGT1_273760-t26_1 | gene=TGGT1_273760 | organism=Toxoplasma_gondii_GT1 | gene_product=heat shock protein HSP70 | transcript_product=heat shock protein HSP70 | location=TGGT1_chrVIII:3285695-3287698(-) | protein_length=667 | sequence_SO=chromosome | SO=protein_coding	TGGT1_273760-t26_1-p1 [114-127]	0	1544.78	14	1.096	0.816	0.13	-0.29	0.919491	0.0426518	0.968257	0.252742	128.08	4.31	0.149	9.189	1.096	0.816	0.852	0.724	-2.74	3.2	0.13	-0.29	-0.23	-0.47	11692.8	13564.8	2.70764e+06	2.30655e+06	69.34	72.89	96.74	88.82	11692.8
FALSE	High	TFGYPFYDTSLGR	[K].TFGYPFYDTSLGR.[S]					0.00016327	0	1	1	4	TGGT1_234380-t26_1-p1	transcript=TGGT1_234380-t26_1 | gene=TGGT1_234380 | organism=Toxoplasma_gondii_GT1 | gene_product=hypothetical protein | transcript_product=hypothetical protein | location=TGGT1_chrX:4225477-4226948(+) | protein_length=347 | sequence_SO=chromosome | SO=protein_coding	TGGT1_234380-t26_1-p1 [94-106]	0	1523.72	13	0.703	1.029	-0.51	0.04	0.150961	0.318199	0.595109	0.588927	0.61	4.97	0.697	0.971	0.703	1.107	0.995	1.029	-0.52	-0.04	-0.51	0.15	-0.01	0.04	87029.7	84474.5	805545	891384	78.43	68.59	57.89	56.91	77529.2
FALSE	High	LYIQQYAQELPKGEEPR	[K].LYIQQYAQELPKGEEPR.[V]	1xLabel:13C(6)15N(2) [K12]; 1xLabel:13C(6)15N(4) [R17]	1xLabel:13C(6)15N(2) [K12]; 1xLabel:13C(6)15N(4) [R17]			0.000175964	0	1	1	3	TGGT1_223590-t26_1-p1	transcript=TGGT1_223590-t26_1 | gene=TGGT1_223590 | organism=Toxoplasma_gondii_GT1 | gene_product=proteasome subunit | transcript_product=proteasome subunit | location=TGGT1_chrX:3626728-3628061(-) | protein_length=369 | sequence_SO=chromosome | SO=protein_coding	TGGT1_223590-t26_1-p1 [230-246]	1	2080.08	17
FALSE	High	FDMGGAAAVLGAAR	[K].FDMGGAAAVLGAAR.[A]	1xLabel:13C(6)15N(4) [R14]	1xLabel:13C(6)15N(4) [R14]			1.12639e-05	0	1	1	6	TGGT1_290670-t26_1-p1	transcript=TGGT1_290670-t26_1 | gene=TGGT1_290670 | organism=Toxoplasma_gondii_GT1 | gene_product=leucyl aminopeptidase LAP | transcript_product=leucyl aminopeptidase LAP | location=TGGT1_chrIX:3637150-3642271(+) | protein_length=781 | sequence_SO=chromosome | SO=protein_coding	TGGT1_290670-t26_1-p1 [568-581]	0	1316.67	14
FALSE	High	FDMGGAAAVLGAAR	[K].FDMGGAAAVLGAAR.[A]					6.93016e-06	0	1	1	8	TGGT1_290670-t26_1-p1	transcript=TGGT1_290670-t26_1 | gene=TGGT1_290670 | organism=Toxoplasma_gondii_GT1 | gene_product=leucyl aminopeptidase LAP | transcript_product=leucyl aminopeptidase LAP | location=TGGT1_chrIX:3637150-3642271(+) | protein_length=781 | sequence_SO=chromosome | SO=protein_coding	TGGT1_290670-t26_1-p1 [568-581]	0	1306.66	14	0.049	0.799	-4.35	-0.32	0.16957	0.00940444	0.615285	0.199491	0.28	0.76	0.701	0.01	0.049	0.799	0.805	0.747	-0.51	-6.64	-4.35	-0.32	-0.31	-0.42	172680	5297.62	1.65197e+06	1.31917e+06	120.91	34.77	63.26	58.75	6352.55
FALSE	High	FDIQVDKIEQFCSNLLPSR	[R].FDIQVDKIEQFCSNLLPSR.[Q]	1xLabel:13C(6)15N(2) [K7]; 1xLabel:13C(6)15N(4) [R19]	1xLabel:13C(6)15N(2) [K7]; 1xLabel:13C(6)15N(4) [R19]			9.38081e-08	0	1	1	1	TGGT1_234450-t26_1-p1	transcript=TGGT1_234450-t26_1 | gene=TGGT1_234450 | organism=Toxoplasma_gondii_GT1 | gene_product=ribosomal protein RPS15A | transcript_product=ribosomal protein RPS15A | location=TGGT1_chrX:4292801-4294683(+) | protein_length=231 | sequence_SO=chromosome | SO=protein_coding	TGGT1_234450-t26_1-p1 [180-198]	1	2270.16	19
FALSE	High	FDIQVDKIEQFCSNLLPSR	[R].FDIQVDKIEQFCSNLLPSR.[Q]					8.39795e-07	0	1	1	1	TGGT1_234450-t26_1-p1	transcript=TGGT1_234450-t26_1 | gene=TGGT1_234450 | organism=Toxoplasma_gondii_GT1 | gene_product=ribosomal protein RPS15A | transcript_product=ribosomal protein RPS15A | location=TGGT1_chrX:4292801-4294683(+) | protein_length=231 | sequence_SO=chromosome | SO=protein_coding	TGGT1_234450-t26_1-p1 [180-198]	1	2252.14	19
FALSE	High	TFADFHGISIESSMLAR	[R].TFADFHGISIESSMLAR.[N]					9.88382e-05	0	1	1	1	TGGT1_285180-t26_1-p1	transcript=TGGT1_285180-t26_1 | gene=TGGT1_285180 | organism=Toxoplasma_gondii_GT1 | gene_product=hypothetical protein | transcript_product=hypothetical protein | location=TGGT1_chrV:2405955-2411632(+) | protein_length=632 | sequence_SO=chromosome | SO=protein_coding	TGGT1_285180-t26_1-p1 [387-403]	0	1881.92	17
FALSE	High	VEGGYVPAVNGR	[K].VEGGYVPAVNGR.[L]					0.000166268	0	1	1	4	TGGT1_290200-t26_1-p1	transcript=TGGT1_290200-t26_1 | gene=TGGT1_290200 | organism=Toxoplasma_gondii_GT1 | gene_product=NAD/NADP octopine/nopaline dehydrogenase, alpha-helical domain-containing protein | transcript_product=NAD/NADP octopine/nopaline dehydrogenase, alpha-helical domain-containing protein | location=TGGT1_chrIX:3448166-3452814(-) | protein_length=435 | sequence_SO=chromosome | SO=protein_coding	TGGT1_290200-t26_1-p1 [329-340]	0	1217.63	12
FALSE	High	VEGLHNDVDFNEPFER	[R].VEGLHNDVDFNEPFER.[M]					0.000198544	0	1	1	6	TGGT1_226830-t26_1-p1	transcript=TGGT1_226830-t26_1 | gene=TGGT1_226830 | organism=Toxoplasma_gondii_GT1 | gene_product=DnaK family protein | transcript_product=DnaK family protein | location=TGGT1_chrX:1215623-1218481(-) | protein_length=952 | sequence_SO=chromosome | SO=protein_coding	TGGT1_226830-t26_1-p1 [375-390]	0	1916.88	16	0.681	0.772	-0.55	-0.37	0.75457	0.0400465	0.902787	0.24624	44.69	7.54	0.681	29.742	0.238	0.772	0.849	0.707	-0.55	4.89	-2.07	-0.37	-0.24	-0.5	63621.1	20966.3	490464	416276	89.05	57.04	73.38	64.91	63621.1
FALSE	High	VEGLHNDVDFNEPFER	[R].VEGLHNDVDFNEPFER.[M]	1xLabel:13C(6)15N(4) [R16]	1xLabel:13C(6)15N(4) [R16]			7.77501e-05	0	1	1	5	TGGT1_226830-t26_1-p1	transcript=TGGT1_226830-t26_1 | gene=TGGT1_226830 | organism=Toxoplasma_gondii_GT1 | gene_product=DnaK family protein | transcript_product=DnaK family protein | location=TGGT1_chrX:1215623-1218481(-) | protein_length=952 | sequence_SO=chromosome | SO=protein_coding	TGGT1_226830-t26_1-p1 [375-390]	0	1926.89	16
FALSE	High	VELAHVAQLIGLPGPK	[R].VELAHVAQLIGLPGPK.[V]					3.92961e-05	0	1	1	2	TGGT1_227960-t26_1-p1	transcript=TGGT1_227960-t26_1 | gene=TGGT1_227960 | organism=Toxoplasma_gondii_GT1 | gene_product=PCI domain-containing protein | transcript_product=PCI domain-containing protein | location=TGGT1_chrX:612917-615688(-) | protein_length=506 | sequence_SO=chromosome | SO=protein_coding	TGGT1_227960-t26_1-p1 [429-444]	0	1641.97	16	1.549	0.686	0.63	-0.54	0.80971	0.0223843	0.927049	0.21201	108.44	3.47	2.683	1.549	0.106	0.686	0.72	0.584	1.42	0.63	-3.24	-0.54	-0.47	-0.78	5614.95	8699.98	533395	384006	50.05	75.51	82.13	71.41	4340.06
FALSE	High	FDILEPASGGTASGDR	[R].FDILEPASGGTASGDR.[A]					3.65262e-05	0	1	1	2	TGGT1_247460-t26_1-p1	transcript=TGGT1_247460-t26_1 | gene=TGGT1_247460 | organism=Toxoplasma_gondii_GT1 | gene_product=proliferating cell nuclear antigen PCNA1 | transcript_product=proliferating cell nuclear antigen PCNA1 | location=TGGT1_chrXII:3286520-3289072(-) | protein_length=317 | sequence_SO=chromosome | SO=protein_coding	TGGT1_247460-t26_1-p1 [241-256]	0	1592.76	16	0.592	0.291	-0.76	-1.78	0.265072	0.276435	0.680218	0.565822	12.47	12.1	0.592	0.064	0.734	0.291	0.879	0.01	-0.76	-3.96	-0.45	-1.78	-0.19	-6.59	9572.71	5663.12	9945.74	8740.29	25.49	86.1	168.66	60.02	9572.71
FALSE	High	KQEAVIQELK	[R].KQEAVIQELK.[E]					7.84171e-05	0	1	1	15	TGGT1_250710-t26_1-p1	transcript=TGGT1_250710-t26_1 | gene=TGGT1_250710 | organism=Toxoplasma_gondii_GT1 | gene_product=microneme protein MIC10 | transcript_product=microneme protein MIC10 | location=TGGT1_chrXII:5071359-5071955(+) | protein_length=198 | sequence_SO=chromosome | SO=protein_coding	TGGT1_250710-t26_1-p1 [109-118]	1	1185.68	10
FALSE	High	VELAHVAQLIGLPGPK	[R].VELAHVAQLIGLPGPK.[V]	1xLabel:13C(6)15N(2) [K16]	1xLabel:13C(6)15N(2) [K16]			5.03344e-05	0	1	1	2	TGGT1_227960-t26_1-p1	transcript=TGGT1_227960-t26_1 | gene=TGGT1_227960 | organism=Toxoplasma_gondii_GT1 | gene_product=PCI domain-containing protein | transcript_product=PCI domain-containing protein | location=TGGT1_chrX:612917-615688(-) | protein_length=506 | sequence_SO=chromosome | SO=protein_coding	TGGT1_227960-t26_1-p1 [429-444]	0	1649.98	16
FALSE	High	FDGEIVPTETSLIVNGQEVTISNTR	[K].FDGEIVPTETSLIVNGQEVTISNTR.[D]	1xLabel:13C(6)15N(4) [R25]	1xLabel:13C(6)15N(4) [R25]			4.42885e-06	0	1	1	1	TGGT1_269190-t26_1-p1	transcript=TGGT1_269190-t26_1 | gene=TGGT1_269190 | organism=Toxoplasma_gondii_GT1 | gene_product=glyceraldehyde-3-phosphate dehydrogenase GAPDH2 | transcript_product=glyceraldehyde-3-phosphate dehydrogenase GAPDH2 | location=TGGT1_chrVIII:6001367-6005276(-) | protein_length=995 | sequence_SO=chromosome | SO=protein_coding	TGGT1_269190-t26_1-p1 [697-721]	0	2729.39	25
FALSE	High	FDGEIVPTETSLIVNGQEVTISNTR	[K].FDGEIVPTETSLIVNGQEVTISNTR.[D]					1.0682e-06	0	1	1	1	TGGT1_269190-t26_1-p1	transcript=TGGT1_269190-t26_1 | gene=TGGT1_269190 | organism=Toxoplasma_gondii_GT1 | gene_product=glyceraldehyde-3-phosphate dehydrogenase GAPDH2 | transcript_product=glyceraldehyde-3-phosphate dehydrogenase GAPDH2 | location=TGGT1_chrVIII:6001367-6005276(-) | protein_length=995 | sequence_SO=chromosome | SO=protein_coding	TGGT1_269190-t26_1-p1 [697-721]	0	2719.38	25	1.129	0.401	0.17	-1.32	0.694265	0.501251	0.874418	0.652374	27.57	23.27	0.392	1.129	1.339	3.825	0.401	0.01	-1.35	0.17	0.42	1.94	-1.32	-6.64	5555.9	6152.29	8450.96	7150.37	39.8	67.41	170.05	47.27	5555.9
FALSE	High	KPWLLTGDVVEIQPNGSMNIIDR	[K].KPWLLTGDVVEIQPNGSMNIIDR.[K]					5.58705e-05	0	1	1	1	TGGT1_310150-t26_1-p1	transcript=TGGT1_310150-t26_1 | gene=TGGT1_310150 | organism=Toxoplasma_gondii_GT1 | gene_product=AMP-binding enzyme domain-containing protein | transcript_product=AMP-binding enzyme domain-containing protein | location=TGGT1_chrXI:1055873-1060273(-) | protein_length=866 | sequence_SO=chromosome | SO=protein_coding	TGGT1_310150-t26_1-p1 [655-677]	0	2595.36	23
FALSE	High	LPKPVTTEPFVFSSGSPYIR	[R].LPKPVTTEPFVFSSGSPYIR.[R]					0.00021259	0	1	1	4	TGGT1_218940-t26_1-p1	transcript=TGGT1_218940-t26_1 | gene=TGGT1_218940 | organism=Toxoplasma_gondii_GT1 | gene_product=hypothetical protein | transcript_product=hypothetical protein | location=TGGT1_chrXII:1136914-1139637(+) | protein_length=326 | sequence_SO=chromosome | SO=protein_coding	TGGT1_218940-t26_1-p1 [210-229]	0	2222.19	20
FALSE	High	VEEPVQVLQPVR	[R].VEEPVQVLQPVR.[L]					0.000156987	0	1	1	7	TGGT1_315270-t26_1-p1	transcript=TGGT1_315270-t26_1 | gene=TGGT1_315270 | organism=Toxoplasma_gondii_GT1 | gene_product=hypothetical protein | transcript_product=hypothetical protein | location=TGGT1_chrXI:4558433-4565813(-) | protein_length=780 | sequence_SO=chromosome | SO=protein_coding	TGGT1_315270-t26_1-p1 [453-464]	0	1392.78	12	0.735	0.778	-0.44	-0.36	0.821976	0.383005	0.932301	0.606822	45.51	10.89	0.735	9.342	0.318	0.778	0.872	0.01	-0.44	3.22	-1.65	-0.36	-0.2	-6.64	17299.5	11702.3	376602	275351	102.46	83.62	80.37	85.4	42807
FALSE	High	FDQADHPSLWQLEEEQQR	[R].FDQADHPSLWQLEEEQQR.[K]					7.09564e-08	0	1	1	7	TGGT1_320220-t26_1-p1	transcript=TGGT1_320220-t26_1 | gene=TGGT1_320220 | organism=Toxoplasma_gondii_GT1 | gene_product=putative ubiquinol cytochrome c oxidoreductase | transcript_product=putative ubiquinol cytochrome c oxidoreductase | location=TGGT1_chrIV:370998-374481(-) | protein_length=487 | sequence_SO=chromosome | SO=protein_coding	TGGT1_320220-t26_1-p1 [185-202]	0	2256.03	18	3.114	0.766	1.64	-0.38	0.0386932	0.0336704	0.360302	0.237106	24.58	3.84	6.186	2.597	3.114	0.766	0.8	0.664	2.63	1.38	1.64	-0.38	-0.32	-0.59	3387.28	8798.05	401310	321018	85.48	124.01	98.21	89.1	11758.7
FALSE	High	FEALIYHMVYQEELGSCK	[K].FEALIYHMVYQEELGSCK.[G]	1xLabel:13C(6)15N(2) [K18]	1xLabel:13C(6)15N(2) [K18]			8.41869e-05	0	1	1	1	TGGT1_289830-t26_1-p1	transcript=TGGT1_289830-t26_1 | gene=TGGT1_289830 | organism=Toxoplasma_gondii_GT1 | gene_product=putative eukaryotic initiation factor-3, delta subunit | transcript_product=putative eukaryotic initiation factor-3, delta subunit | location=TGGT1_chrIX:3281722-3286956(+) | protein_length=335 | sequence_SO=chromosome | SO=protein_coding	TGGT1_289830-t26_1-p1 [275-292]	0	2168.03	18
FALSE	High	LPIGDLATQYFADR	[R].LPIGDLATQYFADR.[D]					3.32583e-05	0	1	1	1	TGGT1_297500-t26_1-p1	transcript=TGGT1_297500-t26_1 | gene=TGGT1_297500 | organism=Toxoplasma_gondii_GT1 | gene_product=T-complex protein 1 eta subunit | transcript_product=T-complex protein 1 eta subunit | location=TGGT1_chrII:1806900-1814443(-) | protein_length=546 | sequence_SO=chromosome | SO=protein_coding	TGGT1_297500-t26_1-p1 [295-308]	0	1579.81	14	3.364	0.819	1.75	-0.29	0.274431	0.0409908	0.687495	0.248505	114.45	2.61	0.767	6.037	3.364	0.84	0.819	0.717	-0.38	2.59	1.75	-0.25	-0.29	-0.48	2606.39	8767.69	759984	622131	113.91	15.73	89.9	81.46	12517.7
FALSE	High	IYIGSLPGEYTDKDVER	[R].IYIGSLPGEYTDKDVER.[E]					0.000183276	0	1	1	2	TGGT1_217540-t26_1-p1	transcript=TGGT1_217540-t26_1 | gene=TGGT1_217540 | organism=Toxoplasma_gondii_GT1 | gene_product=RNA recognition motif-containing protein | transcript_product=RNA recognition motif-containing protein | location=TGGT1_chrXII:1835563-1837479(-) | protein_length=351 | sequence_SO=chromosome | SO=protein_coding	TGGT1_217540-t26_1-p1 [17-33]	1	1954.98	17	2.815	0.351	1.49	-1.51	0.176891	0.271274	0.618047	0.562654	7.3	6.77	2.815	1.018	2.953	0.481	0.351	0.01	1.49	0.03	1.56	-1.06	-1.51	-6.64	4210.48	11851.4	28825	5130.16	100.25	52.04	158.21	79.26	4210.48
FALSE	High	FEAGNMAMVTGGHNVGR	[K].FEAGNMAMVTGGHNVGR.[V]	1xLabel:13C(6)15N(4) [R17]	1xLabel:13C(6)15N(4) [R17]			1.18801e-05	0	1	1	12	TGGT1_207440-t26_1-p1	transcript=TGGT1_207440-t26_1 | gene=TGGT1_207440 | organism=Toxoplasma_gondii_GT1 | gene_product=ribosomal protein RPS4 | transcript_product=ribosomal protein RPS4 | location=TGGT1_chrIb:77395-80548(-) | protein_length=312 | sequence_SO=chromosome | SO=protein_coding	TGGT1_207440-t26_1-p1 [224-240]	0	1757.81	17	0.076	0.904	-3.73	-0.15	0.061653	0.230441	0.435075	0.531772	0.57	10.39	0.076	0.01	0.127	0.904	0.982	0.75	-3.73	-6.64	-2.98	-0.15	-0.03	-0.42	69740.1	3991.38	1.748e+06	1.71572e+06	37.74	111.88	80.66	67.57	52846.3
FALSE	High	FEAGNMAMVTGGHNVGR	[K].FEAGNMAMVTGGHNVGR.[V]					3.28196e-06	0	1	1	11	TGGT1_207440-t26_1-p1	transcript=TGGT1_207440-t26_1 | gene=TGGT1_207440 | organism=Toxoplasma_gondii_GT1 | gene_product=ribosomal protein RPS4 | transcript_product=ribosomal protein RPS4 | location=TGGT1_chrIb:77395-80548(-) | protein_length=312 | sequence_SO=chromosome | SO=protein_coding	TGGT1_207440-t26_1-p1 [224-240]	0	1747.8	17
FALSE	High	FDYAGEKPLENEDIIAVENVVK	[R].FDYAGEKPLENEDIIAVENVVK.[D]	2xLabel:13C(6)15N(2) [K7; K22]	2xLabel:13C(6)15N(2) [K7; K22]			2.45027e-08	0	1	1	3	TGGT1_219540-t26_1-p1	transcript=TGGT1_219540-t26_1 | gene=TGGT1_219540 | organism=Toxoplasma_gondii_GT1 | gene_product=cytosolic tRNA-Ala synthetase | transcript_product=cytosolic tRNA-Ala synthetase | location=TGGT1_chrXII:800723-814444(-) | protein_length=1280 | sequence_SO=chromosome | SO=protein_coding	TGGT1_219540-t26_1-p1 [952-973]	0	2508.28	22
FALSE	High	FDYAGEKPLENEDIIAVENVVK	[R].FDYAGEKPLENEDIIAVENVVK.[D]	1xLabel:13C(6)15N(2) [K7]	1xLabel:13C(6)15N(2) [K7]			0.000153716	0	1	1	1	TGGT1_219540-t26_1-p1	transcript=TGGT1_219540-t26_1 | gene=TGGT1_219540 | organism=Toxoplasma_gondii_GT1 | gene_product=cytosolic tRNA-Ala synthetase | transcript_product=cytosolic tRNA-Ala synthetase | location=TGGT1_chrXII:800723-814444(-) | protein_length=1280 | sequence_SO=chromosome | SO=protein_coding	TGGT1_219540-t26_1-p1 [952-973]	0	2500.27	22
FALSE	High	VEDSSVLGLSSAPR	[K].VEDSSVLGLSSAPR.[N]	1xLabel:13C(6)15N(4) [R14]	1xLabel:13C(6)15N(4) [R14]			0.0001295	0	1	1	1	TGGT1_267620-t26_1-p1	transcript=TGGT1_267620-t26_1 | gene=TGGT1_267620 | organism=Toxoplasma_gondii_GT1 | gene_product=multi-pass transmembrane protein | transcript_product=multi-pass transmembrane protein | location=TGGT1_chrIX:346132-354477(+) | protein_length=508 | sequence_SO=chromosome | SO=protein_coding	TGGT1_267620-t26_1-p1 [481-494]	0	1426.74	14
FALSE	High	FDYAGEKPLENEDIIAVENVVK	[R].FDYAGEKPLENEDIIAVENVVK.[D]					2.07319e-07	0	1	1	5	TGGT1_219540-t26_1-p1	transcript=TGGT1_219540-t26_1 | gene=TGGT1_219540 | organism=Toxoplasma_gondii_GT1 | gene_product=cytosolic tRNA-Ala synthetase | transcript_product=cytosolic tRNA-Ala synthetase | location=TGGT1_chrXII:800723-814444(-) | protein_length=1280 | sequence_SO=chromosome | SO=protein_coding	TGGT1_219540-t26_1-p1 [952-973]	0	2492.26	22	1.118	0.579	0.16	-0.79	0.475011	0.00625851	0.777479	0.197599	34.75	3.68	0.856	2.071	1.118	0.579	0.623	0.536	-0.22	1.05	0.16	-0.79	-0.68	-0.9	8712.71	7459.46	1.05426e+06	657258	64.33	52.06	102.68	96.47	8712.71
FALSE	High	IPLFSAAGLPHNEIGAQICR	[K].IPLFSAAGLPHNEIGAQICR.[Q]					8.86213e-06	0	1	1	3	TGGT1_219800-t26_1-p1	transcript=TGGT1_219800-t26_1 | gene=TGGT1_219800 | organism=Toxoplasma_gondii_GT1 | gene_product=putative vacuolar ATP synthase subunit b | transcript_product=putative vacuolar ATP synthase subunit b | location=TGGT1_chrXII:574692-577426(+) | protein_length=505 | sequence_SO=chromosome | SO=protein_coding	TGGT1_219800-t26_1-p1 [172-191]	0	2107.11	20	3.966	0.643	1.99	-0.64	0.269444	0.0154696	0.683689	0.20435	117.58	2.23	3.966	19.459	0.821	0.62	0.734	0.643	1.99	4.28	-0.29	-0.69	-0.45	-0.64	8298.08	32909.3	327556	204862	70.91	57.05	113.15	111.03	8298.08
FALSE	High	LYLIETGEVDVMK	[R].LYLIETGEVDVMK.[K]					0.000210545	0	1	1	3	TGGT1_242070-t26_1-p1	transcript=TGGT1_242070-t26_1 | gene=TGGT1_242070 | organism=Toxoplasma_gondii_GT1 | gene_product=cAMP-dependent protein kinase regulatory subunit | transcript_product=cAMP-dependent protein kinase regulatory subunit | location=TGGT1_chrVI:1804976-1810461(-) | protein_length=385 | sequence_SO=chromosome | SO=protein_coding	TGGT1_242070-t26_1-p1 [170-182]	0	1509.79	13	1.699	0.059	0.76	-4.07	0.300941	0.210348	0.695212	0.519415	69.94	0.39	0.897	1.699	4.196	0.015	0.059	1.11	-0.16	0.76	2.07	-6.01	-4.07	0.15	7796.71	10657.5	193145	11473.6	52.55	25.5	84.78	48.59	8745.61
FALSE	High	FDSIGVENTEANR	[R].FDSIGVENTEANR.[A]	1xLabel:13C(6)15N(4) [R13]	1xLabel:13C(6)15N(4) [R13]			1.46998e-05	0	1	2	19	TGGT1_236040-t26_1-p1	transcript=TGGT1_236040-t26_1 | gene=TGGT1_236040 | organism=Toxoplasma_gondii_GT1 | gene_product=fructose-1,6-bisphosphate aldolase | transcript_product=fructose-1,6-bisphosphate aldolase | location=TGGT1_chrX:5139351-5141389(+) | protein_length=433 | sequence_SO=chromosome | SO=protein_coding	TGGT1_236040-t26_1-p1 [114-126]	0	1461.68	13	18.943	100	4.24	6.64	0.100686	0.169676	0.526234	0.490034	85.18	0	100	18.943	8.06	100	100	1.236	6.64	4.24	3.01	6.64	6.64	0.31	29864.1	335461	7838.49	3.3986e+06	86.33	35.16	172.26	34.46	580.702
FALSE	High	FDSIGVENTEANR	[R].FDSIGVENTEANR.[A]					1.99292e-05	0	1	2	16	TGGT1_236040-t26_1-p1	transcript=TGGT1_236040-t26_1 | gene=TGGT1_236040 | organism=Toxoplasma_gondii_GT1 | gene_product=fructose-1,6-bisphosphate aldolase | transcript_product=fructose-1,6-bisphosphate aldolase | location=TGGT1_chrX:5139351-5141389(+) | protein_length=433 | sequence_SO=chromosome | SO=protein_coding	TGGT1_236040-t26_1-p1 [114-126]	0	1451.68	13
FALSE	High	LYIQQYAQELPKGEEPR	[K].LYIQQYAQELPKGEEPR.[V]					5.0043e-05	0	1	1	6	TGGT1_223590-t26_1-p1	transcript=TGGT1_223590-t26_1 | gene=TGGT1_223590 | organism=Toxoplasma_gondii_GT1 | gene_product=proteasome subunit | transcript_product=proteasome subunit | location=TGGT1_chrX:3626728-3628061(-) | protein_length=369 | sequence_SO=chromosome | SO=protein_coding	TGGT1_223590-t26_1-p1 [230-246]	1	2062.06	17	1.374	100	0.46	6.64	0.819628	0.19082	0.930856	0.506461	115.44	0	1.374	0.304	4.36	100	100	0.929	0.46	-1.72	2.12	6.64	6.64	-0.11	3416.43	7799.35	3203.47	503146	103.63	98.34	172.43	78.67	14017.1
FALSE	High	KPTQAEAALMHPSEK	[K].KPTQAEAALMHPSEK.[V]					3.81643e-05	0	1	1	3	TGGT1_290950-t26_1-p1	transcript=TGGT1_290950-t26_1 | gene=TGGT1_290950 | organism=Toxoplasma_gondii_GT1 | gene_product=putative clathrin heavy chain | transcript_product=putative clathrin heavy chain | location=TGGT1_chrIX:3770246-3782423(-) | protein_length=1731 | sequence_SO=chromosome | SO=protein_coding	TGGT1_290950-t26_1-p1 [75-89]	0	1637.83	15
FALSE	High	FDQADHPSLWQLEEEQQR	[R].FDQADHPSLWQLEEEQQR.[K]	1xLabel:13C(6)15N(4) [R18]	1xLabel:13C(6)15N(4) [R18]			2.77226e-05	0	1	1	3	TGGT1_320220-t26_1-p1	transcript=TGGT1_320220-t26_1 | gene=TGGT1_320220 | organism=Toxoplasma_gondii_GT1 | gene_product=putative ubiquinol cytochrome c oxidoreductase | transcript_product=putative ubiquinol cytochrome c oxidoreductase | location=TGGT1_chrIV:370998-374481(-) | protein_length=487 | sequence_SO=chromosome | SO=protein_coding	TGGT1_320220-t26_1-p1 [185-202]	0	2266.04	18
FALSE	High	IPLFSAAGLPHNEIGAQICR	[K].IPLFSAAGLPHNEIGAQICR.[Q]	1xLabel:13C(6)15N(4) [R20]	1xLabel:13C(6)15N(4) [R20]			1.6841e-05	0	1	1	2	TGGT1_219800-t26_1-p1	transcript=TGGT1_219800-t26_1 | gene=TGGT1_219800 | organism=Toxoplasma_gondii_GT1 | gene_product=putative vacuolar ATP synthase subunit b | transcript_product=putative vacuolar ATP synthase subunit b | location=TGGT1_chrXII:574692-577426(+) | protein_length=505 | sequence_SO=chromosome | SO=protein_coding	TGGT1_219800-t26_1-p1 [172-191]	0	2117.12	20
FALSE	High	TDRLEEMDAFLSGTNTANVQAVGDR	[K].TDRLEEMDAFLSGTNTANVQAVGDR.[L]					5.46696e-06	0	1	1	2	TGGT1_290950-t26_1-p1	transcript=TGGT1_290950-t26_1 | gene=TGGT1_290950 | organism=Toxoplasma_gondii_GT1 | gene_product=putative clathrin heavy chain | transcript_product=putative clathrin heavy chain | location=TGGT1_chrIX:3770246-3782423(-) | protein_length=1731 | sequence_SO=chromosome | SO=protein_coding	TGGT1_290950-t26_1-p1 [1219-1243]	1	2710.27	25	0.363	0.822	-1.46	-0.28	0.212516	0.474612	0.649953	0.637798	14.74	7.46	0.637	0.363	0.035	0.822	0.761	1.149	-0.65	-1.46	-4.84	-0.28	-0.39	0.2	16467.7	5974.19	340734	280015	127.11	21.7	57.8	80.88	10740
FALSE	High	EPTAIPWGQAGVHYICESTGIFLTK	[K].EPTAIPWGQAGVHYICESTGIFLTK.[E]	1xLabel:13C(6)15N(2) [K25]	1xLabel:13C(6)15N(2) [K25]			0.000106264	0	1	1	1	TGGT1_289690-t26_1-p1	transcript=TGGT1_289690-t26_1 | gene=TGGT1_289690 | organism=Toxoplasma_gondii_GT1 | gene_product=glyceraldehyde-3-phosphate dehydrogenase GAPDH1 | transcript_product=glyceraldehyde-3-phosphate dehydrogenase GAPDH1 | location=TGGT1_chrIX:3189155-3191218(-) | protein_length=489 | sequence_SO=chromosome | SO=protein_coding	TGGT1_289690-t26_1-p1 [229-253]	0	2726.37	25
FALSE	High	EPTAIPWGQAGVHYICESTGIFLTK	[K].EPTAIPWGQAGVHYICESTGIFLTK.[E]					0.000125	0	1	1	2	TGGT1_289690-t26_1-p1	transcript=TGGT1_289690-t26_1 | gene=TGGT1_289690 | organism=Toxoplasma_gondii_GT1 | gene_product=glyceraldehyde-3-phosphate dehydrogenase GAPDH1 | transcript_product=glyceraldehyde-3-phosphate dehydrogenase GAPDH1 | location=TGGT1_chrIX:3189155-3191218(-) | protein_length=489 | sequence_SO=chromosome | SO=protein_coding	TGGT1_289690-t26_1-p1 [229-253]	0	2718.36	25
FALSE	High	MQIDGIHNVLIDNIDK	[R].MQIDGIHNVLIDNIDK.[I]					0.000199526	0	1	1	1	TGGT1_230430-t26_1-p1	transcript=TGGT1_230430-t26_1 | gene=TGGT1_230430 | organism=Toxoplasma_gondii_GT1 | gene_product=putative vesicle-associated membrane protein | transcript_product=putative vesicle-associated membrane protein | location=TGGT1_chrVIII:775206-779637(+) | protein_length=221 | sequence_SO=chromosome | SO=protein_coding	TGGT1_230430-t26_1-p1 [132-147]	0	1837.95	16	1.507	54.661	0.59	5.77	0.430434	0.21128	0.755287	0.520534	79.78	122.98	0.696	7.103	1.507	100	54.661	0.772	-0.52	2.83	0.59	6.64	5.77	-0.37	2825.85	4538.77	3711.33	202865	68.68	63.34	170.66	47.97	6521.76
FALSE	High	EFIKDILNEDLTFEQAYER	[K].EFIKDILNEDLTFEQAYER.[V]	1xLabel:13C(6)15N(2) [K4]; 1xLabel:13C(6)15N(4) [R19]	1xLabel:13C(6)15N(2) [K4]; 1xLabel:13C(6)15N(4) [R19]			8.02221e-05	0	1	1	1	TGGT1_215430-t26_1-p1	transcript=TGGT1_215430-t26_1 | gene=TGGT1_215430 | organism=Toxoplasma_gondii_GT1 | gene_product=hypothetical protein | transcript_product=hypothetical protein | location=TGGT1_chrX:6843523-6847906(-) | protein_length=244 | sequence_SO=chromosome | SO=protein_coding	TGGT1_215430-t26_1-p1 [72-90]	1	2391.18	19	1.177	1.479	0.23	0.56	0.250179	0.59262	0.672514	0.711368	19.93	78.2	1.177	1.018	1.632	1.479	2.26	0.013	0.23	0.03	0.71	0.56	1.18	-6.24	9173.05	9546.77	4542.73	10265	31.11	13.49	171.13	46.2	9173.05
FALSE	High	EFIGNNLTAWLK	[K].EFIGNNLTAWLK.[D]	1xLabel:13C(6)15N(2) [K12]	1xLabel:13C(6)15N(2) [K12]			0.000187955	0	1	1	5	TGGT1_209600-t26_1-p1	transcript=TGGT1_209600-t26_1 | gene=TGGT1_209600 | organism=Toxoplasma_gondii_GT1 | gene_product=hypothetical protein | transcript_product=hypothetical protein | location=TGGT1_chrIb:1372263-1374087(-) | protein_length=451 | sequence_SO=chromosome | SO=protein_coding	TGGT1_209600-t26_1-p1 [304-315]	0	1413.76	12	1.905	0.612	0.93	-0.71	0.146877	0.342587	0.589371	0.600445	40.53	8.01	4.616	1.384	1.905	0.612	0.701	0.01	2.21	0.47	0.93	-0.71	-0.51	-6.64	3209.56	13456.4	1.1645e+06	548997	71.99	39.09	88.92	89.14	2997.63
FALSE	High	EFIGNNLTAWLK	[K].EFIGNNLTAWLK.[D]					0.000117696	0	1	1	6	TGGT1_209600-t26_1-p1	transcript=TGGT1_209600-t26_1 | gene=TGGT1_209600 | organism=Toxoplasma_gondii_GT1 | gene_product=hypothetical protein | transcript_product=hypothetical protein | location=TGGT1_chrIb:1372263-1374087(-) | protein_length=451 | sequence_SO=chromosome | SO=protein_coding	TGGT1_209600-t26_1-p1 [304-315]	0	1405.75	12
FALSE	High	EFLFWTGGNAITTPATFR	[K].EFLFWTGGNAITTPATFR.[L]	1xLabel:13C(6)15N(4) [R18]	1xLabel:13C(6)15N(4) [R18]			8.70604e-06	0	1	1	3	TGGT1_226860-t26_1-p1	transcript=TGGT1_226860-t26_1 | gene=TGGT1_226860 | organism=Toxoplasma_gondii_GT1 | gene_product=SAG-related sequence SRS67 | transcript_product=SAG-related sequence SRS67 | location=TGGT1_chrX:1192695-1193327(-) | protein_length=210 | sequence_SO=chromosome | SO=protein_coding	TGGT1_226860-t26_1-p1 [106-123]	0	2039.03	18
FALSE	High	EFLFWTGGNAITTPATFR	[K].EFLFWTGGNAITTPATFR.[L]					2.71576e-05	0	1	1	3	TGGT1_226860-t26_1-p1	transcript=TGGT1_226860-t26_1 | gene=TGGT1_226860 | organism=Toxoplasma_gondii_GT1 | gene_product=SAG-related sequence SRS67 | transcript_product=SAG-related sequence SRS67 | location=TGGT1_chrX:1192695-1193327(-) | protein_length=210 | sequence_SO=chromosome | SO=protein_coding	TGGT1_226860-t26_1-p1 [106-123]	0	2029.02	18	1.58	0.866	0.66	-0.21	0.705616	0.0730934	0.878829	0.323443	128.12	2.72	0.215	14.437	1.58	0.749	0.887	0.866	-2.22	3.85	0.66	-0.42	-0.17	-0.21	5826.8	13185.5	654194	580357	70.58	79.01	78.46	81.85	5826.8
FALSE	High	RDDLSVLGALTPDFK	[R].RDDLSVLGALTPDFK.[L]					0.000109251	0	1	1	4	TGGT1_243730-t26_1-p1	transcript=TGGT1_243730-t26_1 | gene=TGGT1_243730 | organism=Toxoplasma_gondii_GT1 | gene_product=rhoptry protein ROP9 | transcript_product=rhoptry protein ROP9 | location=TGGT1_chrVI:2733555-2736099(+) | protein_length=353 | sequence_SO=chromosome | SO=protein_coding	TGGT1_243730-t26_1-p1 [198-212]	1	1646.87	15	0.895	0.86	-0.16	-0.22	0.220578	0.0379387	0.65683	0.241722	9.25	3.02	0.825	0.895	1.004	0.86	0.918	0.836	-0.28	-0.16	0.01	-0.22	-0.12	-0.26	91735.1	75720.3	1.51893e+06	1.39445e+06	49.34	58.64	75	71.23	91735.1
FALSE	High	LNGFIEGTAFAGK	[K].LNGFIEGTAFAGK.[T]					8.73405e-05	0	1	1	13	TGGT1_316310-t26_1-p1	transcript=TGGT1_316310-t26_1 | gene=TGGT1_316310 | organism=Toxoplasma_gondii_GT1 | gene_product=superoxide dismutase | transcript_product=superoxide dismutase | location=TGGT1_chrXI:5175968-5177674(-) | protein_length=201 | sequence_SO=chromosome | SO=protein_coding	TGGT1_316310-t26_1-p1 [39-51]	0	1324.69	13	1.054	0.803	0.08	-0.32	0.514267	0.533034	0.793895	0.672173	36.01	4.92	1.054	3.364	0.798	0.803	14.393	0.762	0.08	1.75	-0.33	-0.32	3.85	-0.39	147095	154968	1.39504e+06	1.17394e+06	93.64	81.23	136.84	106.32	147095
FALSE	High	RATYIPVSMYLSTDPTLTHEYEAAK	[K].RATYIPVSMYLSTDPTLTHEYEAAK.[T]	1xLabel:13C(6)15N(2) [K25]; 1xLabel:13C(6)15N(4) [R1]	1xLabel:13C(6)15N(2) [K25]; 1xLabel:13C(6)15N(4) [R1]			4.58935e-06	0	1	1	3	TGGT1_288650-t26_1-p1	transcript=TGGT1_288650-t26_1 | gene=TGGT1_288650 | organism=Toxoplasma_gondii_GT1 | gene_product=dense granule protein GRA12 | transcript_product=dense granule protein GRA12 | location=TGGT1_chrIX:2467879-2469672(-) | protein_length=436 | sequence_SO=chromosome | SO=protein_coding	TGGT1_288650-t26_1-p1 [358-382]	1	2875.43	25	0.586	0.639	-0.77	-0.65	0.163289	0.767064	0.609959	0.835735	10.47	8.44	0.586	0.946	0.465	0.639	1.911	0.55	-0.77	-0.08	-1.1	-0.65	0.93	-0.86	12083.6	6010.89	417236	749035	60.64	77.14	110.12	85.51	2797.25
FALSE	High	MQLSTNVQLDPPR	[R].MQLSTNVQLDPPR.[Y]					7.42814e-05	0	1	1	2	TGGT1_227030-t26_1-p1	transcript=TGGT1_227030-t26_1 | gene=TGGT1_227030 | organism=Toxoplasma_gondii_GT1 | gene_product=hypothetical protein | transcript_product=hypothetical protein | location=TGGT1_chrX:1036138-1037712(+) | protein_length=170 | sequence_SO=chromosome | SO=protein_coding	TGGT1_227030-t26_1-p1 [64-76]	0	1498.77	13
FALSE	High	MQLSTNVQLDPPR	[R].MQLSTNVQLDPPR.[Y]	1xLabel:13C(6)15N(4) [R13]	1xLabel:13C(6)15N(4) [R13]			0.000161154	0	1	1	1	TGGT1_227030-t26_1-p1	transcript=TGGT1_227030-t26_1 | gene=TGGT1_227030 | organism=Toxoplasma_gondii_GT1 | gene_product=hypothetical protein | transcript_product=hypothetical protein | location=TGGT1_chrX:1036138-1037712(+) | protein_length=170 | sequence_SO=chromosome | SO=protein_coding	TGGT1_227030-t26_1-p1 [64-76]	0	1508.78	13	2.056	1.501	1.04	0.59	0.615802	0.59016	0.840477	0.709636	81.98	147.27	3.193	0.44	2.056	3.094	1.501	0.01	1.67	-1.18	1.04	1.63	0.59	-6.64	5713.37	11747	9069.73	6975.35	72.86	31.03	170.21	63.37	3954.04
FALSE	High	SIVIAYEPVWAIGTGK	[K].SIVIAYEPVWAIGTGK.[T]	1xLabel:13C(6)15N(2) [K16]	1xLabel:13C(6)15N(2) [K16]			5.85163e-05	0	1	1	1	TGGT1_233500-t26_1-p1	transcript=TGGT1_233500-t26_1 | gene=TGGT1_233500 | organism=Toxoplasma_gondii_GT1 | gene_product=triose-phosphate isomerase TPI-II | transcript_product=triose-phosphate isomerase TPI-II | location=TGGT1_chrVIII:2678566-2683488(-) | protein_length=375 | sequence_SO=chromosome | SO=protein_coding	TGGT1_233500-t26_1-p1 [283-298]	0	1711.95	16	0.866	1.123	-0.21	0.17	0.316754	0.767185	0.702959	0.835735	11.66	21.69	0.957	0.866	0.386	1.287	1.123	0.52	-0.06	-0.21	-1.37	0.36	0.17	-0.94	8440.38	5093.67	8077.22	10393.8	27.85	36.4	170.98	168.01	8440.38
FALSE	High	EFGLQPVVSTLALAENSEYGGK	[K].EFGLQPVVSTLALAENSEYGGK.[F]	1xLabel:13C(6)15N(2) [K22]	1xLabel:13C(6)15N(2) [K22]			0.000209527	0	1	1	1	TGGT1_234505-t26_1-p1	transcript=TGGT1_234505-t26_1 | gene=TGGT1_234505 | organism=Toxoplasma_gondii_GT1 | gene_product=putative phenylalanyl-tRNA synthetase alpha chain A | transcript_product=putative phenylalanyl-tRNA synthetase alpha chain A | location=TGGT1_chrX:4319172-4323950(+) | protein_length=525 | sequence_SO=chromosome | SO=protein_coding	TGGT1_234505-t26_1-p1 [20-41]	0	2317.18	22	2.32	0.564	1.21	-0.82	0.214639	0.671472	0.651896	0.76799	80.48	10.19	1.061	2.32	5.957	0.443	0.564	30.138	0.09	1.21	2.57	-1.18	-0.82	4.91	5943.33	10861.8	8608.65	4859.45	71.71	16.85	4.4	164.17	10240.1
FALSE	High	EFGLQPVVSTLALAENSEYGGK	[K].EFGLQPVVSTLALAENSEYGGK.[F]					0.00013414	0	1	1	1	TGGT1_234505-t26_1-p1	transcript=TGGT1_234505-t26_1 | gene=TGGT1_234505 | organism=Toxoplasma_gondii_GT1 | gene_product=putative phenylalanyl-tRNA synthetase alpha chain A | transcript_product=putative phenylalanyl-tRNA synthetase alpha chain A | location=TGGT1_chrX:4319172-4323950(+) | protein_length=525 | sequence_SO=chromosome | SO=protein_coding	TGGT1_234505-t26_1-p1 [20-41]	0	2309.17	22
FALSE	High	IATVQDALSYIEK	[K].IATVQDALSYIEK.[A]					1.1986e-05	0	1	1	9	TGGT1_264080-t26_1-p1	transcript=TGGT1_264080-t26_1 | gene=TGGT1_264080 | organism=Toxoplasma_gondii_GT1 | gene_product=acyl carrier protein ACP | transcript_product=acyl carrier protein ACP | location=TGGT1_chrVIIb:176277-177755(-) | protein_length=183 | sequence_SO=chromosome | SO=protein_coding	TGGT1_264080-t26_1-p1 [165-177]	0	1450.78	13	0.74	0.709	-0.43	-0.5	0.0665245	0.0251045	0.445928	0.217748	5.04	6.02	0.74	0.882	0.694	0.709	0.767	0.629	-0.43	-0.18	-0.53	-0.5	-0.38	-0.67	194534	143901	1.85435e+06	1421732	54.95	46.4	95.76	86.7	194534
FALSE	High	VIPGMDVSELHYEYAAK	[K].VIPGMDVSELHYEYAAK.[K]	1xLabel:13C(6)15N(2) [K17]	1xLabel:13C(6)15N(2) [K17]			3.42474e-05	0	1	1	7	TGGT1_218920-t26_1-p1	transcript=TGGT1_218920-t26_1 | gene=TGGT1_218920 | organism=Toxoplasma_gondii_GT1 | gene_product=putative proteasome subunit beta type | transcript_product=putative proteasome subunit beta type | location=TGGT1_chrXII:1150482-1155225(+) | protein_length=309 | sequence_SO=chromosome | SO=protein_coding	TGGT1_218920-t26_1-p1 [285-301]	0	1929.95	17	0.64	0.738	-0.64	-0.44	0.0431209	0.0388554	0.372499	0.244326	5.34	8.31	0.696	0.64	0.484	0.738	0.82	0.662	-0.52	-0.64	-1.05	-0.44	-0.29	-0.6	11958.7	8322.86	554193	454500	5.25	19.76	98.24	89.22	11958.7
FALSE	High	RATYIPVSMYLSTDPTLTHEYEAAK	[K].RATYIPVSMYLSTDPTLTHEYEAAK.[T]					3.19545e-06	0	1	1	5	TGGT1_288650-t26_1-p1	transcript=TGGT1_288650-t26_1 | gene=TGGT1_288650 | organism=Toxoplasma_gondii_GT1 | gene_product=dense granule protein GRA12 | transcript_product=dense granule protein GRA12 | location=TGGT1_chrIX:2467879-2469672(-) | protein_length=436 | sequence_SO=chromosome | SO=protein_coding	TGGT1_288650-t26_1-p1 [358-382]	1	2857.41	25
FALSE	High	VIPGMDVSELHYEYAAK	[K].VIPGMDVSELHYEYAAK.[K]					3.22972e-05	0	1	1	4	TGGT1_218920-t26_1-p1	transcript=TGGT1_218920-t26_1 | gene=TGGT1_218920 | organism=Toxoplasma_gondii_GT1 | gene_product=putative proteasome subunit beta type | transcript_product=putative proteasome subunit beta type | location=TGGT1_chrXII:1150482-1155225(+) | protein_length=309 | sequence_SO=chromosome | SO=protein_coding	TGGT1_218920-t26_1-p1 [285-301]	0	1921.94	17
FALSE	High	VIPGFMMQGGDFTNGDGTGGESIYGPQFNDEK	[R].VIPGFMMQGGDFTNGDGTGGESIYGPQFNDEK.[F]					1.87255e-06	0	1	1	1	TGGT1_283850-t26_1-p1	transcript=TGGT1_283850-t26_1 | gene=TGGT1_283850 | organism=Toxoplasma_gondii_GT1 | gene_product=peptidyl-prolyl cis-trans isomerase | transcript_product=peptidyl-prolyl cis-trans isomerase | location=TGGT1_chrV:2748825-2756049(-) | protein_length=503 | sequence_SO=chromosome | SO=protein_coding	TGGT1_283850-t26_1-p1 [391-422]	0	3365.47	32
FALSE	High	LASYNPEEELIK	[K].LASYNPEEELIK.[S]	1xLabel:13C(6)15N(2) [K12]	1xLabel:13C(6)15N(2) [K12]			8.98402e-05	0	1	1	7	TGGT1_269442-t26_1-p1	transcript=TGGT1_269442-t26_1 | gene=TGGT1_269442 | organism=Toxoplasma_gondii_GT1 | gene_product=putative calmodulin | transcript_product=putative calmodulin | location=TGGT1_chrVIII:5794616-5795668(-) | protein_length=87 | sequence_SO=chromosome | SO=protein_coding	TGGT1_269442-t26_1-p1 [16-27]	0	1413.74	12
FALSE	High	EFTSVENFKDEFSK	[K].EFTSVENFKDEFSK.[V]	2xLabel:13C(6)15N(2) [K9; K14]	2xLabel:13C(6)15N(2) [K9; K14]			5.97114e-05	0	1	1	11	TGGT1_316310-t26_1-p1	transcript=TGGT1_316310-t26_1 | gene=TGGT1_316310 | organism=Toxoplasma_gondii_GT1 | gene_product=superoxide dismutase | transcript_product=superoxide dismutase | location=TGGT1_chrXI:5175968-5177674(-) | protein_length=201 | sequence_SO=chromosome | SO=protein_coding	TGGT1_316310-t26_1-p1 [103-116]	1	1722.82	14
FALSE	High	TASDCQPLPSLFK	[K].TASDCQPLPSLFK.[F]					0.000211055	0	1	1	4	TGGT1_253430-t26_1-p1	transcript=TGGT1_253430-t26_1 | gene=TGGT1_253430 | organism=Toxoplasma_gondii_GT1 | gene_product=putative asparagine synthetase | transcript_product=putative asparagine synthetase | location=TGGT1_chrIII:924367-930594(+) | protein_length=588 | sequence_SO=chromosome | SO=protein_coding	TGGT1_253430-t26_1-p1 [122-134]	0	1406.7	13	0.878	0.765	-0.19	-0.39	0.991251	0.0661337	0.996125	0.307539	54.15	7.58	2.515	0.461	0.878	0.765	0.832	0.63	1.33	-1.12	-0.19	-0.39	-0.27	-0.67	4867.18	7921.31	328147	251045	45.68	59.33	125.68	116.31	3927.28
FALSE	High	EFTSVENFKDEFSK	[K].EFTSVENFKDEFSK.[V]					6.52914e-05	0	1	1	10	TGGT1_316310-t26_1-p1	transcript=TGGT1_316310-t26_1 | gene=TGGT1_316310 | organism=Toxoplasma_gondii_GT1 | gene_product=superoxide dismutase | transcript_product=superoxide dismutase | location=TGGT1_chrXI:5175968-5177674(-) | protein_length=201 | sequence_SO=chromosome | SO=protein_coding	TGGT1_316310-t26_1-p1 [103-116]	1	1706.79	14	0.948	0.815	-0.08	-0.3	0.21455	0.00598552	0.651896	0.197599	5.74	0.34	0.989	0.948	0.869	0.817	0.815	0.775	-0.02	-0.08	-0.2	-0.29	-0.3	-0.37	148882	147228	1.98387e+06	1.61602e+06	46.59	40.15	103.5	100.92	148882
FALSE	High	LATDLGIMDPEEK	[K].LATDLGIMDPEEK.[D]					1.6594e-05	0	1	1	9	TGGT1_309210-t26_1-p1	transcript=TGGT1_309210-t26_1 | gene=TGGT1_309210 | organism=Toxoplasma_gondii_GT1 | gene_product=putative peroxiredoxin 6 | transcript_product=putative peroxiredoxin 6 | location=TGGT1_chrXI:521482-524360(-) | protein_length=402 | sequence_SO=chromosome | SO=protein_coding	TGGT1_309210-t26_1-p1 [286-298]	0	1431.7	13
FALSE	High	LATDLGIMDPEEK	[K].LATDLGIMDPEEK.[D]	1xLabel:13C(6)15N(2) [K13]	1xLabel:13C(6)15N(2) [K13]			1.70917e-05	0	1	1	9	TGGT1_309210-t26_1-p1	transcript=TGGT1_309210-t26_1 | gene=TGGT1_309210 | organism=Toxoplasma_gondii_GT1 | gene_product=putative peroxiredoxin 6 | transcript_product=putative peroxiredoxin 6 | location=TGGT1_chrXI:521482-524360(-) | protein_length=402 | sequence_SO=chromosome | SO=protein_coding	TGGT1_309210-t26_1-p1 [286-298]	0	1439.72	13	0.353	0.698	-1.5	-0.52	0.800271	0.032274	0.921136	0.233588	16.64	6.72	0.353	0.034	17.172	0.763	0.6	0.698	-1.5	-4.86	4.1	-0.39	-0.74	-0.52	7172.16	4555.35	873396	523858	158.86	73.06	107.53	109.77	7172.16
FALSE	High	LATDLGIMDPEEK	[K].LATDLGIMDPEEK.[D]	1xOxidation [M8]	1xOxidation [M8]			5.19669e-05	0	1	1	1	TGGT1_309210-t26_1-p1	transcript=TGGT1_309210-t26_1 | gene=TGGT1_309210 | organism=Toxoplasma_gondii_GT1 | gene_product=putative peroxiredoxin 6 | transcript_product=putative peroxiredoxin 6 | location=TGGT1_chrXI:521482-524360(-) | protein_length=402 | sequence_SO=chromosome | SO=protein_coding	TGGT1_309210-t26_1-p1 [286-298]	0	1447.7	13	0.553	0.178	-0.86	-2.49	0.254191	0.20886	0.673461	0.518085	20.5	4.19	1.065	0.553	0.302	0.178	0.794	0.02	0.09	-0.86	-1.73	-2.49	-0.33	-5.64	10523.5	4669.07	10986	7727.6	12.89	68.65	164.42	69.21	10780.5
FALSE	High	LATDLGIMDPEEKDK	[K].LATDLGIMDPEEKDK.[A]					8.46651e-05	0	1	1	2	TGGT1_309210-t26_1-p1	transcript=TGGT1_309210-t26_1 | gene=TGGT1_309210 | organism=Toxoplasma_gondii_GT1 | gene_product=putative peroxiredoxin 6 | transcript_product=putative peroxiredoxin 6 | location=TGGT1_chrXI:521482-524360(-) | protein_length=402 | sequence_SO=chromosome | SO=protein_coding	TGGT1_309210-t26_1-p1 [286-300]	1	1674.83	15	0.708	2.951	-0.5	1.56	0.333452	0.302891	0.710623	0.581501	32.35	22.56	0.15	0.708	1.016	3.399	2.951	0.741	-2.74	-0.5	0.02	1.77	1.56	-0.43	9136.61	6467.64	11920.2	35170.8	20.34	83.53	169.32	157.67	8729.16
FALSE	High	VLPFWFDHIAPSIMEGK	[R].VLPFWFDHIAPSIMEGK.[R]					2.89724e-05	0	1	1	8	TGGT1_297060-t26_1-p1	transcript=TGGT1_297060-t26_1 | gene=TGGT1_297060 | organism=Toxoplasma_gondii_GT1 | gene_product=phosphoglycerate mutase PGMII | transcript_product=phosphoglycerate mutase PGMII | location=TGGT1_chrII:1486715-1490594(-) | protein_length=339 | sequence_SO=chromosome | SO=protein_coding	TGGT1_297060-t26_1-p1 [250-266]	0	1987.01	17
FALSE	High	VLPFWFDHIAPSIMEGK	[R].VLPFWFDHIAPSIMEGK.[R]	1xLabel:13C(6)15N(2) [K17]	1xLabel:13C(6)15N(2) [K17]			7.91868e-06	0	1	1	4	TGGT1_297060-t26_1-p1	transcript=TGGT1_297060-t26_1 | gene=TGGT1_297060 | organism=Toxoplasma_gondii_GT1 | gene_product=phosphoglycerate mutase PGMII | transcript_product=phosphoglycerate mutase PGMII | location=TGGT1_chrII:1486715-1490594(-) | protein_length=339 | sequence_SO=chromosome | SO=protein_coding	TGGT1_297060-t26_1-p1 [250-266]	0	1995.03	17	1.624	0.791	0.7	-0.34	0.679289	0.178377	0.867515	0.497408	70.69	4.73	0.504	1.624	2.398	0.994	0.751	0.791	-0.99	0.7	1.26	-0.01	-0.41	-0.34	4785.33	11473.8	906435	901033	36.52	67.25	106.95	100.43	3885.58
FALSE	High	EFQEEIKEGVEETKHEDDPEMTR	[K].EFQEEIKEGVEETKHEDDPEMTR.[L]	2xLabel:13C(6)15N(2) [K7; K14]; 1xLabel:13C(6)15N(4) [R23]	2xLabel:13C(6)15N(2) [K7; K14]; 1xLabel:13C(6)15N(4) [R23]			8.98402e-05	0	1	1	5	TGGT1_277080-t26_1-p1	transcript=TGGT1_277080-t26_1 | gene=TGGT1_277080 | organism=Toxoplasma_gondii_GT1 | gene_product=microneme protein MIC5 | transcript_product=microneme protein MIC5 | location=TGGT1_chrXII:6631512-6633486(-) | protein_length=181 | sequence_SO=chromosome | SO=protein_coding	TGGT1_277080-t26_1-p1 [82-104]	2	2831.29	23
FALSE	High	EFQEEIKEGVEETKHEDDPEMTR	[K].EFQEEIKEGVEETKHEDDPEMTR.[L]	1xOxidation [M21]	1xOxidation [M21]			5.83474e-05	0	1	1	2	TGGT1_277080-t26_1-p1	transcript=TGGT1_277080-t26_1 | gene=TGGT1_277080 | organism=Toxoplasma_gondii_GT1 | gene_product=microneme protein MIC5 | transcript_product=microneme protein MIC5 | location=TGGT1_chrXII:6631512-6633486(-) | protein_length=181 | sequence_SO=chromosome | SO=protein_coding	TGGT1_277080-t26_1-p1 [82-104]	2	2821.25	23	0.629	0.825	-0.67	-0.28	0.00904676	0.0961456	0.238541	0.374053	0.28	6.42	0.629	0.709	0.626	0.773	0.825	0.939	-0.67	-0.5	-0.68	-0.37	-0.28	-0.09	437719	273849	583285	481366	62.41	65.14	72.5	79.24	95637.1
FALSE	High	EFQEEIKEGVEETKHEDDPEMTR	[K].EFQEEIKEGVEETKHEDDPEMTR.[L]					1.21287e-05	0	1	1	8	TGGT1_277080-t26_1-p1	transcript=TGGT1_277080-t26_1 | gene=TGGT1_277080 | organism=Toxoplasma_gondii_GT1 | gene_product=microneme protein MIC5 | transcript_product=microneme protein MIC5 | location=TGGT1_chrXII:6631512-6633486(-) | protein_length=181 | sequence_SO=chromosome | SO=protein_coding	TGGT1_277080-t26_1-p1 [82-104]	2	2805.25	23	1.162	0.806	0.22	-0.31	0.661703	0.0195135	0.862149	0.205588	106.24	2.93	1.162	0.329	14.03	0.862	0.781	0.806	0.22	-1.6	3.81	-0.21	-0.36	-0.31	5654.75	6717.82	2.84966e+06	2.2264e+06	85.21	68.06	76.05	75.65	9029.64
FALSE	High	EFQDTFTQQHALYQQGLQEQQK	[R].EFQDTFTQQHALYQQGLQEQQK.[Q]	1xLabel:13C(6)15N(2) [K22]	1xLabel:13C(6)15N(2) [K22]			3.69162e-08	0	1	1	11	TGGT1_313380-t26_1-p1	transcript=TGGT1_313380-t26_1 | gene=TGGT1_313380 | organism=Toxoplasma_gondii_GT1 | gene_product=hypothetical protein | transcript_product=hypothetical protein | location=TGGT1_chrXI:3292372-3294103(+) | protein_length=274 | sequence_SO=chromosome | SO=protein_coding	TGGT1_313380-t26_1-p1 [148-169]	0	2703.29	22	11.502	0.637	3.52	-0.65	0.175212	0.0460731	0.618047	0.259574	133.72	8.81	11.502	1.128	26.265	0.637	0.764	0.543	3.52	0.17	4.72	-0.65	-0.39	-0.88	5692.6	53861.1	1.52586e+06	1.16628e+06	142.4	100.21	89.09	74.16	876.781
FALSE	High	EFQDTFTQQHALYQQGLQEQQK	[R].EFQDTFTQQHALYQQGLQEQQK.[Q]					4.79809e-09	0	1	1	12	TGGT1_313380-t26_1-p1	transcript=TGGT1_313380-t26_1 | gene=TGGT1_313380 | organism=Toxoplasma_gondii_GT1 | gene_product=hypothetical protein | transcript_product=hypothetical protein | location=TGGT1_chrXI:3292372-3294103(+) | protein_length=274 | sequence_SO=chromosome | SO=protein_coding	TGGT1_313380-t26_1-p1 [148-169]	0	2695.27	22
FALSE	High	REAEMVHFPAVEGAPPLPTIPK	[R].REAEMVHFPAVEGAPPLPTIPK.[V]					9.37132e-05	0	1	1	5	TGGT1_231640-t26_1-p1	transcript=TGGT1_231640-t26_1 | gene=TGGT1_231640 | organism=Toxoplasma_gondii_GT1 | gene_product=alveolin domain containing intermediate filament IMC1 | transcript_product=alveolin domain containing intermediate filament IMC1 | location=TGGT1_chrVIII:1511977-1514752(+) | protein_length=609 | sequence_SO=chromosome | SO=protein_coding	TGGT1_231640-t26_1-p1 [294-315]	1	2386.26	22	1.058	0.62	0.08	-0.69	0.444911	0.0049555	0.761724	0.197599	26.48	0.06	0.869	1.058	10.152	0.681	0.619	0.62	-0.2	0.08	3.34	-0.55	-0.69	-0.69	8585.76	9080.83	944600	584745	70.22	24.85	47.56	44.31	9948.46
FALSE	High	EFESFAVSMLTDNGEVLR	[K].EFESFAVSMLTDNGEVLR.[F]	1xLabel:13C(6)15N(4) [R18]	1xLabel:13C(6)15N(4) [R18]			4.44201e-06	0	1	1	5	TGGT1_229480-t26_1-p1	transcript=TGGT1_229480-t26_1 | gene=TGGT1_229480 | organism=Toxoplasma_gondii_GT1 | gene_product=putative calcium binding protein precursor | transcript_product=putative calcium binding protein precursor | location=TGGT1_chrVIII:289042-291582(-) | protein_length=335 | sequence_SO=chromosome | SO=protein_coding	TGGT1_229480-t26_1-p1 [288-305]	0	2053.98	18
FALSE	High	EFESFAVSMLTDNGEVLR	[K].EFESFAVSMLTDNGEVLR.[F]					9.45733e-07	0	1	1	6	TGGT1_229480-t26_1-p1	transcript=TGGT1_229480-t26_1 | gene=TGGT1_229480 | organism=Toxoplasma_gondii_GT1 | gene_product=putative calcium binding protein precursor | transcript_product=putative calcium binding protein precursor | location=TGGT1_chrVIII:289042-291582(-) | protein_length=335 | sequence_SO=chromosome | SO=protein_coding	TGGT1_229480-t26_1-p1 [288-305]	0	2043.97	18	1.129	0.778	0.17	-0.36	0.862744	0.0146423	0.94953	0.20435	68.85	4.4	1.759	0.604	1.129	0.816	0.778	0.733	0.81	-0.73	0.17	-0.29	-0.36	-0.45	8867.12	10006.8	919674	715410	17.74	34.67	107.73	103.68	6441.57
FALSE	High	IATVQDALSYIEK	[K].IATVQDALSYIEK.[A]	1xLabel:13C(6)15N(2) [K13]	1xLabel:13C(6)15N(2) [K13]			1.49629e-05	0	1	1	6	TGGT1_264080-t26_1-p1	transcript=TGGT1_264080-t26_1 | gene=TGGT1_264080 | organism=Toxoplasma_gondii_GT1 | gene_product=acyl carrier protein ACP | transcript_product=acyl carrier protein ACP | location=TGGT1_chrVIIb:176277-177755(-) | protein_length=183 | sequence_SO=chromosome | SO=protein_coding	TGGT1_264080-t26_1-p1 [165-177]	0	1458.79	13
FALSE	High	VLSIFGVADGK	[K].VLSIFGVADGK.[K]	1xLabel:13C(6)15N(2) [K11]	1xLabel:13C(6)15N(2) [K11]			9.96703e-05	0	1	1	8	TGGT1_291960-t26_1-p1	transcript=TGGT1_291960-t26_1 | gene=TGGT1_291960 | organism=Toxoplasma_gondii_GT1 | gene_product=rhoptry kinase family protein ROP40 (incomplete catalytic triad) | transcript_product=rhoptry kinase family protein ROP40 (incomplete catalytic triad) | location=TGGT1_chrIX:4241532-4244563(+) | protein_length=525 | sequence_SO=chromosome | SO=protein_coding	TGGT1_291960-t26_1-p1 [277-287]	0	1113.64	11	2.488	0.741	1.31	-0.43	0.360241	0.032913	0.722652	0.23645	108.62	2.57	0.665	2.488	20.193	0.741	0.764	0.62	-0.59	1.31	4.34	-0.43	-0.39	-0.69	4539.31	91661.1	1.17049e+06	867070	161.28	76.98	56.75	44.31	176403
FALSE	High	LAVQEEVAGLIAGAK	[R].LAVQEEVAGLIAGAK.[T]	1xLabel:13C(6)15N(2) [K15]	1xLabel:13C(6)15N(2) [K15]			4.30169e-05	0	1	1	3	TGGT1_223960-t26_1-p1	transcript=TGGT1_223960-t26_1 | gene=TGGT1_223960 | organism=Toxoplasma_gondii_GT1 | gene_product=ubiquitin interaction motif family protein | transcript_product=ubiquitin interaction motif family protein | location=TGGT1_chrX:3328529-3332678(-) | protein_length=388 | sequence_SO=chromosome | SO=protein_coding	TGGT1_223960-t26_1-p1 [26-40]	0	1476.85	15
FALSE	High	VISLTFMSEELDQTSLAELK	[R].VISLTFMSEELDQTSLAELK.[S]					0.00021568	0	1	1	3	TGGT1_297070-t26_1-p1	transcript=TGGT1_297070-t26_1 | gene=TGGT1_297070 | organism=Toxoplasma_gondii_GT1 | gene_product=hypothetical protein | transcript_product=hypothetical protein | location=TGGT1_chrII:1492810-1494671(-) | protein_length=519 | sequence_SO=chromosome | SO=protein_coding	TGGT1_297070-t26_1-p1 [315-334]	0	2254.15	20	1.262	0.456	0.34	-1.13	0.893467	0.0682081	0.960939	0.313091	134.51	9.09	1.262	0.117	4.198	0.321	0.672	0.456	0.34	-3.1	2.07	-1.64	-0.57	-1.13	7263.85	11724.1	341381	204818	149.84	13.87	94.62	83.66	7263.85
FALSE	High	LNELESYLYALR	[R].LNELESYLYALR.[D]	1xLabel:13C(6)15N(4) [R12]	1xLabel:13C(6)15N(4) [R12]			8.02221e-05	0	1	1	1	TGGT1_219310-t26_1-p1	transcript=TGGT1_219310-t26_1 | gene=TGGT1_219310 | organism=Toxoplasma_gondii_GT1 | gene_product=DnaK family protein | transcript_product=DnaK family protein | location=TGGT1_chrXII:915528-922343(+) | protein_length=818 | sequence_SO=chromosome | SO=protein_coding	TGGT1_219310-t26_1-p1 [604-615]	0	1493.79	12
FALSE	High	VLSMEDLLTLFEK	[K].VLSMEDLLTLFEK.[Q]					1.67417e-05	0	1	1	1	TGGT1_300260-t26_1-p1	transcript=TGGT1_300260-t26_1 | gene=TGGT1_300260 | organism=Toxoplasma_gondii_GT1 | gene_product=threonyl-tRNA synthetase family protein | transcript_product=threonyl-tRNA synthetase family protein | location=TGGT1_chrXII:83727-88302(+) | protein_length=844 | sequence_SO=chromosome | SO=protein_coding	TGGT1_300260-t26_1-p1 [812-824]	0	1537.82	13
FALSE	High	VLSMEDLLTLFEK	[K].VLSMEDLLTLFEK.[Q]	1xLabel:13C(6)15N(2) [K13]	1xLabel:13C(6)15N(2) [K13]			6.13712e-06	0	1	1	1	TGGT1_300260-t26_1-p1	transcript=TGGT1_300260-t26_1 | gene=TGGT1_300260 | organism=Toxoplasma_gondii_GT1 | gene_product=threonyl-tRNA synthetase family protein | transcript_product=threonyl-tRNA synthetase family protein | location=TGGT1_chrXII:83727-88302(+) | protein_length=844 | sequence_SO=chromosome | SO=protein_coding	TGGT1_300260-t26_1-p1 [812-824]	0	1545.83	13	0.829	0.403	-0.27	-1.31	0.634891	0.407992	0.848926	0.612716	87.56	23.51	0.116	2.382	0.829	0.403	0.01	1.923	-3.11	1.25	-0.27	-1.31	-6.64	0.94	9295.09	7703.66	263512	13134.8	35.67	80.57	86.58	138.96	12179
FALSE	High	EELTTPPQNSILELR	[K].EELTTPPQNSILELR.[V]	1xLabel:13C(6)15N(4) [R15]	1xLabel:13C(6)15N(4) [R15]			0.000167566	0	1	1	2	TGGT1_239820-t26_1-p1	transcript=TGGT1_239820-t26_1 | gene=TGGT1_239820 | organism=Toxoplasma_gondii_GT1 | gene_product=D-3-phosphoglycerate dehydrogenase | transcript_product=D-3-phosphoglycerate dehydrogenase | location=TGGT1_chrVI:931789-940557(-) | protein_length=604 | sequence_SO=chromosome | SO=protein_coding	TGGT1_239820-t26_1-p1 [419-433]	0	1749.93	15
FALSE	High	EELTTPPQNSILELR	[K].EELTTPPQNSILELR.[V]					0.00021568	0	1	1	2	TGGT1_239820-t26_1-p1	transcript=TGGT1_239820-t26_1 | gene=TGGT1_239820 | organism=Toxoplasma_gondii_GT1 | gene_product=D-3-phosphoglycerate dehydrogenase | transcript_product=D-3-phosphoglycerate dehydrogenase | location=TGGT1_chrVI:931789-940557(-) | protein_length=604 | sequence_SO=chromosome | SO=protein_coding	TGGT1_239820-t26_1-p1 [419-433]	0	1739.92	15	8.183	0.726	3.03	-0.46	0.456133	0.276058	0.766074	0.565813	47.83	14.48	0.283	8.183	10.824	0.86	0.188	0.726	-1.82	3.03	3.44	-0.22	-2.41	-0.46	1186.4	9688.79	5377.91	4625.54	133.05	53.39	171.89	172.11	12966.3
FALSE	High	MSGSVETSSIYVSDTPEQIK	[K].MSGSVETSSIYVSDTPEQIK.[N]					6.5668e-05	0	1	1	1	TGGT1_288360-t26_1-p1	transcript=TGGT1_288360-t26_1 | gene=TGGT1_288360 | organism=Toxoplasma_gondii_GT1 | gene_product=tryptophanyl-tRNA synthetase (TrpRS2) | transcript_product=tryptophanyl-tRNA synthetase (TrpRS2) | location=TGGT1_chrIX:2284649-2289081(+) | protein_length=689 | sequence_SO=chromosome | SO=protein_coding	TGGT1_288360-t26_1-p1 [566-585]	0	2158.02	20	1.31	0.629	0.39	-0.67	0.865451	0.155742	0.950575	0.474136	8.89	12.12	1.388	1.31	0.444	0.287	0.629	0.759	0.47	0.39	-1.17	-1.8	-0.67	-0.4	5139.97	5576.44	3969	2495.75	76.23	34.51	172.17	172.48	5139.97
FALSE	High	EELQNVVSAQR	[R].EELQNVVSAQR.[R]	1xLabel:13C(6)15N(4) [R11]	1xLabel:13C(6)15N(4) [R11]			0.000170624	0	1	1	9	TGGT1_238250-t26_1-p1	transcript=TGGT1_238250-t26_1 | gene=TGGT1_238250 | organism=Toxoplasma_gondii_GT1 | gene_product=ribosomal protein RPL36 | transcript_product=ribosomal protein RPL36 | location=TGGT1_chrVI:154936-156110(+) | protein_length=101 | sequence_SO=chromosome | SO=protein_coding	TGGT1_238250-t26_1-p1 [88-98]	0	1282.66	11
FALSE	High	EELQNVVSAQR	[R].EELQNVVSAQR.[R]					0.000171506	0	1	1	11	TGGT1_238250-t26_1-p1	transcript=TGGT1_238250-t26_1 | gene=TGGT1_238250 | organism=Toxoplasma_gondii_GT1 | gene_product=ribosomal protein RPL36 | transcript_product=ribosomal protein RPL36 | location=TGGT1_chrVI:154936-156110(+) | protein_length=101 | sequence_SO=chromosome | SO=protein_coding	TGGT1_238250-t26_1-p1 [88-98]	0	1272.65	11	0.797	0.889	-0.33	-0.17	0.215769	0.0425578	0.651896	0.252742	2.49	3.03	1.018	0.797	0.776	0.912	0.889	0.83	0.03	-0.33	-0.37	-0.13	-0.17	-0.27	187444	170609	1.76404e+06	1.56809e+06	15.44	19.4	51.71	46.69	187444
FALSE	High	VLSNANHLVSTALWR	[R].VLSNANHLVSTALWR.[N]					2.19674e-05	0	1	1	13	TGGT1_363030-t26_1-p1	transcript=TGGT1_363030-t26_1 | gene=TGGT1_363030 | organism=Toxoplasma_gondii_GT1 | gene_product=rhoptry protein ROP8 | transcript_product=rhoptry protein ROP8 | location=AAQM03000199:1511-3196(+) | protein_length=561 | sequence_SO=contig | SO=protein_coding	TGGT1_363030-t26_1-p1 [221-235]	0	1680.92	15	0.398	0.974	-1.33	-0.04	0.418286	0.384455	0.7492	0.606822	14.12	1.4	0.158	1.826	0.398	0.974	0.525	0.983	-2.66	0.87	-1.33	-0.04	-0.93	-0.02	7420.27	3954.88	4234159	2.22182e+06	75.09	62.07	54.12	72.02	7420.27
FALSE	High	VLSNANHLVSTALWR	[R].VLSNANHLVSTALWR.[N]	1xLabel:13C(6)15N(4) [R15]	1xLabel:13C(6)15N(4) [R15]			2.65259e-05	0	1	1	15	TGGT1_363030-t26_1-p1	transcript=TGGT1_363030-t26_1 | gene=TGGT1_363030 | organism=Toxoplasma_gondii_GT1 | gene_product=rhoptry protein ROP8 | transcript_product=rhoptry protein ROP8 | location=AAQM03000199:1511-3196(+) | protein_length=561 | sequence_SO=contig | SO=protein_coding	TGGT1_363030-t26_1-p1 [221-235]	0	1690.93	15
FALSE	High	EEINDQLQAVMSLLEHVK	[R].EEINDQLQAVMSLLEHVK.[Q]	1xOxidation [M11]; 1xLabel:13C(6)15N(2) [K18]	1xOxidation [M11]; 1xLabel:13C(6)15N(2) [K18]			3.51623e-05	0	1	1	4	TGGT1_310790-t26_1-p1	transcript=TGGT1_310790-t26_1 | gene=TGGT1_310790 | organism=Toxoplasma_gondii_GT1 | gene_product=hypothetical protein | transcript_product=hypothetical protein | location=TGGT1_chrXI:1556574-1558606(+) | protein_length=219 | sequence_SO=chromosome | SO=protein_coding	TGGT1_310790-t26_1-p1 [145-162]	0	2120.08	18	0.01	0.727	-6.64	-0.46	0.447791	0.338035	0.763254	0.599047	0	0.36	0.01	0.01	14.273	0.73	0.727	0.016	-6.64	-6.64	3.84	-0.45	-0.46	-5.96	548240	10529.1	541237	205766	116.84	48.3	47.5	93.31	1.75387e+06
FALSE	High	EEINDQLQAVMSLLEHVK	[R].EEINDQLQAVMSLLEHVK.[Q]	1xOxidation [M11]	1xOxidation [M11]			3.13633e-05	0	1	1	5	TGGT1_310790-t26_1-p1	transcript=TGGT1_310790-t26_1 | gene=TGGT1_310790 | organism=Toxoplasma_gondii_GT1 | gene_product=hypothetical protein | transcript_product=hypothetical protein | location=TGGT1_chrXI:1556574-1558606(+) | protein_length=219 | sequence_SO=chromosome | SO=protein_coding	TGGT1_310790-t26_1-p1 [145-162]	0	2112.06	18
FALSE	High	EESQSEDSSEEAVQHLR	[R].EESQSEDSSEEAVQHLR.[K]					5.76667e-06	0	1	1	9	TGGT1_244280-t26_1-p1	transcript=TGGT1_244280-t26_1 | gene=TGGT1_244280 | organism=Toxoplasma_gondii_GT1 | gene_product=hypothetical protein | transcript_product=hypothetical protein | location=TGGT1_chrVI:3070946-3071335(+) | protein_length=129 | sequence_SO=chromosome | SO=protein_coding	TGGT1_244280-t26_1-p1 [98-114]	0	1959.85	17	0.218	0.676	-2.2	-0.56	0.0685988	0.0509424	0.45045	0.269024	4.61	8.43	0.072	0.218	0.36	0.676	0.76	0.54	-3.8	-2.2	-1.47	-0.56	-0.4	-0.89	196006	42636.7	662441	503524	51.55	90.16	55.53	47.47	69798.9
FALSE	High	EESQSEDSSEEAVQHLR	[R].EESQSEDSSEEAVQHLR.[K]	1xLabel:13C(6)15N(4) [R17]	1xLabel:13C(6)15N(4) [R17]			3.24872e-05	0	1	1	4	TGGT1_244280-t26_1-p1	transcript=TGGT1_244280-t26_1 | gene=TGGT1_244280 | organism=Toxoplasma_gondii_GT1 | gene_product=hypothetical protein | transcript_product=hypothetical protein | location=TGGT1_chrVI:3070946-3071335(+) | protein_length=129 | sequence_SO=chromosome | SO=protein_coding	TGGT1_244280-t26_1-p1 [98-114]	0	1969.86	17
FALSE	High	LAVQEEVAGLIAGAK	[R].LAVQEEVAGLIAGAK.[T]					0.000206997	0	1	1	3	TGGT1_223960-t26_1-p1	transcript=TGGT1_223960-t26_1 | gene=TGGT1_223960 | organism=Toxoplasma_gondii_GT1 | gene_product=ubiquitin interaction motif family protein | transcript_product=ubiquitin interaction motif family protein | location=TGGT1_chrX:3328529-3332678(-) | protein_length=388 | sequence_SO=chromosome | SO=protein_coding	TGGT1_223960-t26_1-p1 [26-40]	0	1468.84	15	0.027	0.718	-5.2	-0.48	0.0661777	0.0172788	0.445928	0.20435	0.02	0.73	0.26	0.022	0.027	0.718	0.725	0.621	-1.94	-5.53	-5.2	-0.48	-0.46	-0.69	79231	3017.66	439363	318417	36.71	130.28	82.96	73.96	79231
FALSE	High	LAVNLIPFPR	[K].LAVNLIPFPR.[L]	1xLabel:13C(6)15N(4) [R10]	1xLabel:13C(6)15N(4) [R10]			0.000174618	0	2	3	12	TGGT1_221620-t26_1-p1; TGGT1_266960-t26_1-p1	transcript=TGGT1_221620-t26_1 | gene=TGGT1_221620 | organism=Toxoplasma_gondii_GT1 | gene_product=putative beta-tubulin | transcript_product=putative beta-tubulin | location=TGGT1_chrII:472166-474503(-) | protein_length=449 | sequence_SO=chromosome | SO=protein_coding transcript=TGGT1_266960-t26_1 | gene=TGGT1_266960 | organism=Toxoplasma_gondii_GT1 | gene_product=beta-tubulin | transcript_produc…	TGGT1_221620-t26_1-p1 [253-262]; TGGT1_266960-t26_1-p1 [253-262]	0	1149.7	10
FALSE	High	RAFDDAITEFDNVSEDSYK	[K].RAFDDAITEFDNVSEDSYK.[D]	1xLabel:13C(6)15N(2) [K19]; 1xLabel:13C(6)15N(4) [R1]	1xLabel:13C(6)15N(2) [K19]; 1xLabel:13C(6)15N(4) [R1]			0.000125341	0	1	1	4	TGGT1_263090-t26_1-p1	transcript=TGGT1_263090-t26_1 | gene=TGGT1_263090 | organism=Toxoplasma_gondii_GT1 | gene_product=14-3-3 protein | transcript_product=14-3-3 protein | location=TGGT1_chrVIIb:786880-789511(+) | protein_length=323 | sequence_SO=chromosome | SO=protein_coding	TGGT1_263090-t26_1-p1 [266-284]	1	2240.01	19
FALSE	High	MQSAEITALESPAIK	[-].MQSAEITALESPAIK.[A]	1xAcetyl [N-Term]	1xAcetyl [N-Term]	TGGT1_265370-t26_1-p1 1xAcetyl [N-Term]	TGGT1_265370-t26_1-p1 1xAcetyl [N-Term]	4.98979e-05	0	1	1	1	TGGT1_265370-t26_1-p1	transcript=TGGT1_265370-t26_1 | gene=TGGT1_265370 | organism=Toxoplasma_gondii_GT1 | gene_product=hypothetical protein | transcript_product=hypothetical protein | location=TGGT1_chrIX:1421867-1422752(+) | protein_length=142 | sequence_SO=chromosome | SO=protein_coding	TGGT1_265370-t26_1-p1 [1-15]	0	1630.84	15	0.098	0.946	-3.34	-0.08	0.0539509	0.57464	0.412742	0.698154	0.13	3.16	0.089	0.098	0.374	0.924	0.946	1.711	-3.48	-3.34	-1.42	-0.11	-0.08	0.77	57185.5	5113.38	186853	172568	74.51	41.94	88.9	88.16	57185.5
[truncated: 14,177 more rows]
[truncated: 89 more columns]

## Sheet: 6.2_ThioP_enriched
	Checked	Confidence	Sequence	Annotated.Sequence	Modifications	Modifications..all.possible.sites.	Modifications.in.Master.Proteins	Modifications.in.Master.Proteins..all.Sites.	Qvality.PEP	Qvality.q.value	X..Protein.Groups	X..Proteins	X..PSMs	Master.Protein.Accessions	Master.Protein.Descriptions	Positions.in.Master.Proteins	X..Missed.Cleavages	Theo..MH...Da.	Sequence.Length	Abundance.Ratio...heavy..eluate..dKu80.....light..eluate..1M.	Abundance.Ratio...heavy..supernatant..dKu80.....light..supernatant..1M.	Abundance.Ratio..log2....heavy..eluate..dKu80.....light..eluate..1M.	Abundance.Ratio..log2....heavy..supernatant..dKu80.....light..supernatant..1M.	Abundance.Ratio.P.Value...heavy..eluate..dKu80.....light..eluate..1M.	Abundance.Ratio.P.Value...heavy..supernatant..dKu80.....light..supernatant..1M.	Abundance.Ratio.Adj..P.Value...heavy..eluate..dKu80.....light..eluate..1M.	Abundance.Ratio.Adj..P.Value...heavy..supernatant..dKu80.....light..supernatant..1M.	Abundance.Ratio.Variability.......heavy..eluate..dKu80.....light..eluate..1M.	Abundance.Ratio.Variability.......heavy..supernatant..dKu80.....light..supernatant..1M.	Abundance.Ratios..by.Bio..Rep.....heavy..eluate..dKu80.1.....light..eluate..1M.1.	Abundance.Ratios..by.Bio..Rep.....heavy..eluate..dKu80.2.....light..eluate..1M.2.	Abundance.Ratios..by.Bio..Rep.....heavy..eluate..dKu80.3.....light..eluate..1M.3.	Abundance.Ratios..by.Bio..Rep.....heavy..supernatant..dKu80.1.....light..supernatant..1M.1.	Abundance.Ratios..by.Bio..Rep.....heavy..supernatant..dKu80.2.....light..supernatant..1M.2.	Abundance.Ratios..by.Bio..Rep.....heavy..supernatant..dKu80.3.....light..supernatant..1M.3.	Abundance.Ratios..log2...by.Bio..Rep.....heavy..eluate..dKu80.1.....light..eluate..1M.1.	Abundance.Ratios..log2...by.Bio..Rep.....heavy..eluate..dKu80.2.....light..eluate..1M.2.	Abundance.Ratios..log2...by.Bio..Rep.....heavy..eluate..dKu80.3.....light..eluate..1M.3.	Abundance.Ratios..log2...by.Bio..Rep.....heavy..supernatant..dKu80.1.....light..supernatant..1M.1.	Abundance.Ratios..log2...by.Bio..Rep.....heavy..supernatant..dKu80.2.....light..supernatant..1M.2.	Abundance.Ratios..log2...by.Bio..Rep.....heavy..supernatant..dKu80.3.....light..supernatant..1M.3.	Abundances..Grouped...light..eluate..1M	Abundances..Grouped...heavy..eluate..dKu80	Abundances..Grouped...light..supernatant..1M	Abundances..Grouped...heavy..supernatant..dKu80	Abundances..Grouped..CV......light..eluate..1M	Abundances..Grouped..CV......heavy..eluate..dKu80	Abundances..Grouped..CV......light..supernatant..1M	Abundances..Grouped..CV......heavy..supernatant..dKu80
[truncated: 734 more rows]
[truncated: 131 more columns]

[truncated: 1 more sheets: 6.3_ThioP_flowthrough]
