# Supplementary material for: Analysis of CDPK1 targets identifies a trafficking adaptor complex that regulates microneme exocytosis in Toxoplasma
Source: eLife. 2023 Nov 7;12:RP85654. doi: 10.7554/eLife.85654 (PMC10629828; doi:10.7554/eLife.85654)
Supplement: Supplementary file 7. — Protein and abundance assignments from Proteome Discoverer 2.4 and analysis. [file elife-85654-supp7.xlsx]

## Sheet: 7_ThioP_proteome_RAW
Checked	Protein FDR Confidence: Combined	Master	Accession	Description	Exp. q-value: Combined	Sum PEP Score	Coverage [%]	# Peptides	# PSMs	# Unique Peptides	# Protein Groups	# AAs	MW [kDa]	calc. pI	Score Sequest HT: Sequest HT	# Peptides (by Search Engine): Sequest HT	Abundance Ratio: (heavy, eluate, dKu80) / (light, eluate, 1M)	Abundance Ratio: (heavy, supernatant, dKu80) / (light, supernatant, 1M)	Abundance Ratio P-Value: (heavy, eluate, dKu80) / (light, eluate, 1M)	Abundance Ratio P-Value: (heavy, supernatant, dKu80) / (light, supernatant, 1M)	Abundance Ratio Adj. P-Value: (heavy, eluate, dKu80) / (light, eluate, 1M)	Abundance Ratio Adj. P-Value: (heavy, supernatant, dKu80) / (light, supernatant, 1M)	Abundance Ratio Variability [%]: (heavy, eluate, dKu80) / (light, eluate, 1M)	Abundance Ratio Variability [%]: (heavy, supernatant, dKu80) / (light, supernatant, 1M)	Abundance Ratios (by Bio. Rep.): (heavy, eluate, dKu80,1) / (light, eluate, 1M,1)	Abundance Ratios (by Bio. Rep.): (heavy, eluate, dKu80,2) / (light, eluate, 1M,2)	Abundance Ratios (by Bio. Rep.): (heavy, eluate, dKu80,3) / (light, eluate, 1M,3)	Abundance Ratios (by Bio. Rep.): (heavy, supernatant, dKu80,1) / (light, supernatant, 1M,1)	Abundance Ratios (by Bio. Rep.): (heavy, supernatant, dKu80,2) / (light, supernatant, 1M,2)	Abundance Ratios (by Bio. Rep.): (heavy, supernatant, dKu80,3) / (light, supernatant, 1M,3)	Abundance Ratios (log2) (by Bio. Rep.): (heavy, eluate, dKu80,1) / (light, eluate, 1M,1)	Abundance Ratios (log2) (by Bio. Rep.): (heavy, eluate, dKu80,2) / (light, eluate, 1M,2)	Abundance Ratios (log2) (by Bio. Rep.): (heavy, eluate, dKu80,3) / (light, eluate, 1M,3)	Abundance Ratios (log2) (by Bio. Rep.): (heavy, supernatant, dKu80,1) / (light, supernatant, 1M,1)	Abundance Ratios (log2) (by Bio. Rep.): (heavy, supernatant, dKu80,2) / (light, supernatant, 1M,2)	Abundance Ratios (log2) (by Bio. Rep.): (heavy, supernatant, dKu80,3) / (light, supernatant, 1M,3)	Abundances (Grouped): light, eluate, 1M	Abundances (Grouped): heavy, eluate, dKu80	Abundances (Grouped): light, supernatant, 1M	Abundances (Grouped): heavy, supernatant, dKu80	Abundances (Grouped) CV [%]: light, eluate, 1M	Abundances (Grouped) CV [%]: heavy, eluate, dKu80	Abundances (Grouped) CV [%]: light, supernatant, 1M	Abundances (Grouped) CV [%]: heavy, supernatant, dKu80	Abundances (by Bio. Rep.): light, eluate, 1M,1	Abundances (by Bio. Rep.): light, eluate, 1M,2	Abundances (by Bio. Rep.): light, eluate, 1M,3	Abundances (by Bio. Rep.): heavy, eluate, dKu80,1	Abundances (by Bio. Rep.): heavy, eluate, dKu80,2
FALSE	High	Master Protein	TGGT1_286420A-t26_1-p1	transcript=TGGT1_286420A-t26_1 | gene=TGGT1_286420A | organism=Toxoplasma_gondii_GT1 | gene_product=putative elongation factor 1-alpha (EF-1-ALPHA) | transcript_product=putative elongation factor 1-alpha (EF-1-ALPHA) | location=TGGT1_chrV:1692242-1694172(-) | protein_length=448 | sequence_SO=chromosome | SO=protein_coding	0	431.634	66	22	1347	6	1	448	49.5	8.78	2479.37	22	0.89	0.85	0.197994	0.313423	0.331072	0.434955	2.21	4.47	0.89	1.004	0.873	0.85	1.052	0.814	-0.17	0.01	-0.2	-0.23	0.07	-0.3	4.64176e+06	4.05207e+06	4.27212e+07	4.49446e+07	5.09	12.25	48.69	40.21	4.38634e+06	4.85687e+06	4.64176e+06	3.90253e+06	4.87503e+06
FALSE	High	Master Protein	TGGT1_311720-t26_1-p1	transcript=TGGT1_311720-t26_1 | gene=TGGT1_311720 | organism=Toxoplasma_gondii_GT1 | gene_product=chaperonin protein BiP | transcript_product=chaperonin protein BiP | location=TGGT1_chrXI:2188121-2191497(-) | protein_length=668 | sequence_SO=chromosome | SO=protein_coding	0	416.689	55	38	932	36	1	668	73.2	5.38	1753.56	38	0.897	0.701	0.156411	0.00906261	0.300974	0.149741	2.35	1.85	0.914	0.897	0.71	0.761	0.701	0.683	-0.13	-0.16	-0.49	-0.39	-0.51	-0.55	1.19247e+07	9.93877e+06	9.80041e+07	6.87217e+07	23.82	17.4	68.34	64.2	1.19247e+07	8.56509e+06	1.39892e+07	1.09042e+07	7.6806e+06
FALSE	High	Master Protein	TGGT1_273760-t26_1-p1	transcript=TGGT1_273760-t26_1 | gene=TGGT1_273760 | organism=Toxoplasma_gondii_GT1 | gene_product=heat shock protein HSP70 | transcript_product=heat shock protein HSP70 | location=TGGT1_chrVIII:3285695-3287698(-) | protein_length=667 | sequence_SO=chromosome | SO=protein_coding	0	374.428	48	33	822	31	1	667	72.2	5.2	1655.07	33	0.915	0.877	0.270791	0.0764957	0.398855	0.198089	4.79	0.7	0.915	1.019	0.88	0.877	0.882	0.749	-0.13	0.03	-0.19	-0.19	-0.18	-0.42	9.75875e+06	8.92835e+06	7.73504e+07	6.82255e+07	28.09	21.41	70.4	60.46	9.75875e+06	6.53565e+06	1.17339e+07	8.92835e+06	6.65875e+06
FALSE	High	Master Protein	TGGT1_205470-t26_1-p1	transcript=TGGT1_205470-t26_1 | gene=TGGT1_205470 | organism=Toxoplasma_gondii_GT1 | gene_product=putative translation elongation factor 2 family protein | transcript_product=putative translation elongation factor 2 family protein | location=TGGT1_chrVIIa:1297616-1301283(+) | protein_length=832 | sequence_SO=chromosome | SO=protein_coding	0	369.059	50	31	536	31	1	832	93	6.33	885.55	31	1.106	0.757	0.442543	0.300352	0.542215	0.424026	26.6	10.44	0.908	1.106	1.591	0.757	1.083	0.664	-0.14	0.15	0.67	-0.4	0.12	-0.59	4.64329e+06	5.13573e+06	4.88871e+07	5.29573e+07	5.91	23.09	71.69	53.29	4.6545e+06	4.64329e+06	4.18863e+06	4.22452e+06	5.13573e+06
FALSE	High	Master Protein	TGGT1_308090-t26_1-p1	transcript=TGGT1_308090-t26_1 | gene=TGGT1_308090 | organism=Toxoplasma_gondii_GT1 | gene_product=rhoptry protein ROP5 | transcript_product=rhoptry protein ROP5 | location=AAQM03000031:206-1855(-) | protein_length=549 | sequence_SO=contig | SO=protein_coding	0	368.994	63	25	1029	10	1	549	60.7	9.25	1836.4	25	0.657	0.899	0.110681	0.785045	0.272034	0.836288	11.51	18.29	0.657	0.775	0.411	0.762	1.269	0.899	-0.61	-0.37	-1.28	-0.39	0.34	-0.15	6.13787e+06	3.70868e+06	5.58469e+07	7.08666e+07	15.92	19.94	49.06	46.07	6.13787e+06	4.78673e+06	6.56491e+06	4.03003e+06	3.70868e+06
FALSE	High	Master Protein	TGGT1_226960-t26_1-p1	transcript=TGGT1_226960-t26_1 | gene=TGGT1_226960 | organism=Toxoplasma_gondii_GT1 | gene_product=phosphofructokinase PFKII | transcript_product=phosphofructokinase PFKII | location=TGGT1_chrX:1093641-1104060(-) | protein_length=1225 | sequence_SO=chromosome | SO=protein_coding	0	359.501	43	37	392	37	1	1225	131.3	6.24	674.61	37	0.68	0.714	0.0045222	0.0746147	0.0794754	0.197626	0.1	11.17	0.731	0.679	0.68	0.714	0.849	0.608	-0.45	-0.56	-0.56	-0.49	-0.24	-0.72	1.98473e+06	1.3494e+06	3.43112e+07	2.91379e+07	25.91	29.49	70.47	55.14	2.35995e+06	1.37999e+06	1.98473e+06	1.72522e+06	936821
FALSE	High	Master Protein	TGGT1_244560-t26_1-p1	transcript=TGGT1_244560-t26_1 | gene=TGGT1_244560 | organism=Toxoplasma_gondii_GT1 | gene_product=putative heat shock protein 90 | transcript_product=putative heat shock protein 90 | location=TGGT1_chrVI:3273039-3276701(+) | protein_length=853 | sequence_SO=chromosome | SO=protein_coding	0	358.875	47	41	711	41	1	853	97.5	5.03	1248.5	41	0.843	0.779	0.0701729	0.135799	0.234676	0.263838	5.31	6.79	0.801	0.843	0.929	0.779	0.837	0.519	-0.32	-0.25	-0.11	-0.36	-0.26	-0.94	6.79924e+06	6.31604e+06	6.93361e+07	5.80677e+07	20.95	19.04	84.26	57.17	8.27548e+06	5.41407e+06	6.79924e+06	6.62702e+06	4.5656e+06
FALSE	High	Master Protein	TGGT1_288380-t26_1-p1	transcript=TGGT1_288380-t26_1 | gene=TGGT1_288380 | organism=Toxoplasma_gondii_GT1 | gene_product=heat shock protein HSP90 | transcript_product=heat shock protein HSP90 | location=TGGT1_chrIX:2294323-2298742(+) | protein_length=708 | sequence_SO=chromosome | SO=protein_coding	0	348.146	43	36	675	36	1	708	81.9	5.03	1235.93	36	0.898	0.749	0.246709	0.0282164	0.378411	0.161762	8.95	4.54	0.898	1.013	0.831	0.749	0.79	0.659	-0.15	0.02	-0.27	-0.42	-0.34	-0.6	1.20564e+07	1.08324e+07	6.40775e+07	5.06126e+07	17.35	8.13	63.3	53.62	1.20564e+07	9.35012e+06	1.32678e+07	1.08324e+07	9.46978e+06
FALSE	High	Master Protein	TGGT1_235470-t26_1-p1	transcript=TGGT1_235470-t26_1 | gene=TGGT1_235470 | organism=Toxoplasma_gondii_GT1 | gene_product=myosin A | transcript_product=myosin A | location=TGGT1_chrX:4773284-4778894(+) | protein_length=831 | sequence_SO=chromosome | SO=protein_coding	0	340.585	45	33	569	33	1	831	93.3	8.16	985.65	33	0.895	0.836	0.144181	0.0464985	0.286446	0.166604	0.01	5.5	0.895	0.699	0.895	0.836	0.904	0.792	-0.16	-0.52	-0.16	-0.26	-0.15	-0.34	2.74483e+06	2.45722e+06	4.95444e+07	4.47666e+07	44.26	52.76	62.71	56.82	4.93282e+06	2.17951e+06	2.74483e+06	4.41624e+06	1.52298e+06
FALSE	High	Master Protein	TGGT1_294800B-t26_1-p1	transcript=TGGT1_294800B-t26_1 | gene=TGGT1_294800B | organism=Toxoplasma_gondii_GT1 | gene_product=putative elongation factor 1-alpha (EF-1-ALPHA) | transcript_product=putative elongation factor 1-alpha (EF-1-ALPHA) | location=TGGT1_chrIa:1133102-1134034(-) | protein_length=310 | sequence_SO=chromosome | SO=protein_coding	0	338.615	68	17	1072	1	1	310	33.7	9.04	1898.26	17	0.843	0.852					2.28	3.24	0.861	0.843	0.01	0.852	0.877	0.792	-0.22	-0.25	-6.64	-0.23	-0.19	-0.34	2.40248e+06	2.70648e+06	3.92539e+07	34425144	41.63	39.85	29.17	27.53	4.19718e+06	2.40248e+06	1.95408e+06	3.61575e+06	2.02587e+06
FALSE	High	Master Protein	TGGT1_232350-t26_1-p1	transcript=TGGT1_232350-t26_1 | gene=TGGT1_232350 | organism=Toxoplasma_gondii_GT1 | gene_product=lactate dehydrogenase LDH1 | transcript_product=lactate dehydrogenase LDH1 | location=TGGT1_chrVIII:2023599-2025126(+) | protein_length=329 | sequence_SO=chromosome | SO=protein_coding	0	298.658	79	20	699	20	1	329	35.5	6.38	1206.66	20	1.25	1.04	0.132394	0.248941	0.280298	0.377576	12.36	3.69	1.355	1.25	1.044	1.04	1.165	1.014	0.44	0.32	0.06	0.06	0.22	0.02	1.14781e+07	1.55485e+07	1.07563e+08	1.25295e+08	29.33	15.94	59.6	54.48	1.14781e+07	1.13013e+07	1.83547e+07	1.55485e+07	1.41314e+07
FALSE	High	Master Protein	TGGT1_219540-t26_1-p1	transcript=TGGT1_219540-t26_1 | gene=TGGT1_219540 | organism=Toxoplasma_gondii_GT1 | gene_product=cytosolic tRNA-Ala synthetase | transcript_product=cytosolic tRNA-Ala synthetase | location=TGGT1_chrXII:800723-814444(-) | protein_length=1280 | sequence_SO=chromosome | SO=protein_coding	0	294.723	39	37	278	37	1	1280	139.3	6.83	435.55	37	0.592	0.707	0.0615405	0.00644798	0.232613	0.149741	11.76	1.05	0.592	0.742	0.459	0.717	0.707	0.652	-0.76	-0.43	-1.12	-0.48	-0.5	-0.62	1.64875e+06	1.07424e+06	22898379	1.61946e+07	27.07	30.45	72.76	67.29	2.38786e+06	1.4481e+06	1.64875e+06	1.41468e+06	1.07424e+06
FALSE	High	Master Protein	TGGT1_221620-t26_1-p1	transcript=TGGT1_221620-t26_1 | gene=TGGT1_221620 | organism=Toxoplasma_gondii_GT1 | gene_product=putative beta-tubulin | transcript_product=putative beta-tubulin | location=TGGT1_chrII:472166-474503(-) | protein_length=449 | sequence_SO=chromosome | SO=protein_coding	0	290.806	68	21	512	6	1	449	50	4.81	1103.9	21	0.01	0.549					0	10.25	0.01	0.018	0.01	0.549	0.675	0.349	-6.64	-5.8	-6.64	-0.87	-0.57	-1.52	1.21902e+06	21948.3	4.73618e+06	2.87212e+06	56.46		98.55	66.11	389157	1.21902e+06	1.53383e+06		21948.3
FALSE	High	Master Protein	TGGT1_312630-t26_1-p1	transcript=TGGT1_312630-t26_1 | gene=TGGT1_312630 | organism=Toxoplasma_gondii_GT1 | gene_product=putative anonymous antigen-1 | transcript_product=putative anonymous antigen-1 | location=TGGT1_chrXI:2804165-2821550(-) | protein_length=2639 | sequence_SO=chromosome | SO=protein_coding	0	286.486	22	41	252	41	1	2639	286	5	338.16	41	0.626	0.695	0.0158898	0.016024	0.122322	0.149741	0.1	2.14	0.51	0.626	0.627	0.695	0.674	0.777	-0.97	-0.68	-0.67	-0.52	-0.57	-0.36	3.33465e+06	1.70066e+06	1.83279e+07	1.23616e+07	37.27	42.83	60.67	68.59	3.33465e+06	2.45582e+06	5.11476e+06	1.70066e+06	1.53664e+06
FALSE	High	Master Protein	TGGT1_266960-t26_1-p1	transcript=TGGT1_266960-t26_1 | gene=TGGT1_266960 | organism=Toxoplasma_gondii_GT1 | gene_product=beta-tubulin | transcript_product=beta-tubulin | location=TGGT1_chrIX:705551-707606(-) | protein_length=449 | sequence_SO=chromosome | SO=protein_coding	0	280.417	64	21	537	6	1	449	50	4.81	1106.4	21	0.611	0.705	0.349208	0.251631	0.468011	0.378839	24.71	7.17	0.611	1.238	0.338	0.705	1.059	0.637	-0.71	0.31	-1.56	-0.5	0.08	-0.65	416765	254655	8.08399e+06	8.55918e+06	21.35	49.95	94.83	76.76	416765	397439	577888	254655	491852
FALSE	High	Master Protein	TGGT1_209030-t26_1-p1	transcript=TGGT1_209030-t26_1 | gene=TGGT1_209030 | organism=Toxoplasma_gondii_GT1 | gene_product=actin ACT1 | transcript_product=actin ACT1 | location=TGGT1_chrIb:1014618-1016180(+) | protein_length=376 | sequence_SO=chromosome | SO=protein_coding	0	279.266	67	21	974	20	1	376	41.9	5.16	1610.53	21	0.535	0.747	0.0115044	0.0451412	0.116211	0.166604	1.49	0.79	0.554	0.438	0.535	0.747	0.873	0.74	-0.85	-1.19	-0.9	-0.42	-0.2	-0.43	1.66975e+07	9.25178e+06	1.63733e+08	1.42901e+08	15.74	24.64	58.8	53.8	1.66975e+07	1.48846e+07	2.02298e+07	9.25178e+06	6.51302e+06
FALSE	High	Master Protein	TGGT1_256760-t26_1-p1	transcript=TGGT1_256760-t26_1 | gene=TGGT1_256760 | organism=Toxoplasma_gondii_GT1 | gene_product=pyruvate kinase PyK1 | transcript_product=pyruvate kinase PyK1 | location=TGGT1_chrVIIb:4413512-4417055(-) | protein_length=531 | sequence_SO=chromosome | SO=protein_coding	0	264.722	52	22	400	22	1	531	57.5	6.4	655.45	22	1.168	0.834	0.0414188	0.000667809	0.208628	0.141622	3.8	0.7	1.287	1.168	1.138	0.826	0.84	0.834	0.36	0.22	0.19	-0.28	-0.25	-0.26	5.60713e+06	7.217e+06	2.83773e+07	2.38254e+07	55.73	51.46	62.4	62.49	5.60713e+06	3.99014e+06	1.14115e+07	7.217e+06	4.65888e+06
FALSE	High	Master Protein	TGGT1_203310-t26_1-p1	transcript=TGGT1_203310-t26_1 | gene=TGGT1_203310 | organism=Toxoplasma_gondii_GT1 | gene_product=dense granule protein GRA7 | transcript_product=dense granule protein GRA7 | location=TGGT1_chrVIIa:2502941-2503651(+) | protein_length=236 | sequence_SO=chromosome | SO=protein_coding	0	255.111	56	13	706	13	1	236	25.8	5.22	1709.29	13	0.76	1.018	0.263293	0.990692	0.391485	0.996966	0.56	5.23	0.755	0.76	1.051	0.931	1.018	1.054	-0.41	-0.4	0.07	-0.1	0.03	0.08	1.46234e+07	1.53756e+07	9.64416e+07	9.81571e+07	24.03	22.48	47.78	52.85	1.3558e+07	2.0828e+07	1.46234e+07	1.02375e+07	1.58302e+07
FALSE	High	Master Protein	TGGT1_273090-t26_1-p1	transcript=TGGT1_273090-t26_1 | gene=TGGT1_273090 | organism=Toxoplasma_gondii_GT1 | gene_product=cell division protein CDC48CY | transcript_product=cell division protein CDC48CY | location=TGGT1_chrVIII:3661986-3671254(-) | protein_length=811 | sequence_SO=chromosome | SO=protein_coding	0	252.852	46	34	346	33	1	811	89.3	5.11	455.38	34	0.531	0.737	0.0801667	0.0216947	0.247788	0.149741	7.15	2.23	0.531	0.785	0.44	0.737	0.822	0.717	-0.91	-0.35	-1.19	-0.44	-0.28	-0.48	1.75265e+06	1.08025e+06	2.56643e+07	2.10854e+07	11.65	24.45	67.15	62.08	2.0361e+06	1.62554e+06	1.75265e+06	1.08025e+06	1.27572e+06
FALSE	High	Master Protein	TGGT1_249390-t26_1-p1	transcript=TGGT1_249390-t26_1 | gene=TGGT1_249390 | organism=Toxoplasma_gondii_GT1 | gene_product=glutamate/leucine/phenylalanine/valine dehydrogenase family protein | transcript_product=glutamate/leucine/phenylalanine/valine dehydrogenase family protein | location=TGGT1_chrXII:4441593-4452115(+) | protein_length=1206 | sequence_SO=chromosome | SO=protein_coding	0	252.467	40	33	203	33	1	1206	135.4	7.37	333.44	33	0.016	0.777	0.00039273	0.0314771	0.0534113	0.161762	0	5.59	0.016	0.017	0.013	0.826	0.777	0.699	-5.93	-5.9	-6.27	-0.28	-0.36	-0.52	4.80239e+07	710212	1.32378e+07	1.02867e+07	24.86	17.66	69.31	60.77	4.80239e+07	3.29419e+07	5.49795e+07	787321	550837
FALSE	High	Master Protein	TGGT1_231640-t26_1-p1	transcript=TGGT1_231640-t26_1 | gene=TGGT1_231640 | organism=Toxoplasma_gondii_GT1 | gene_product=alveolin domain containing intermediate filament IMC1 | transcript_product=alveolin domain containing intermediate filament IMC1 | location=TGGT1_chrVIII:1511977-1514752(+) | protein_length=609 | sequence_SO=chromosome | SO=protein_coding	0	252.3	49	26	405	26	1	609	69.6	5.19	669.41	26	0.567	0.801	0.0340722	0.0266852	0.200625	0.161762	3.1	5.43	0.567	0.727	0.531	0.756	0.857	0.801	-0.82	-0.46	-0.91	-0.4	-0.22	-0.32	4.88978e+06	2.5942e+06	4.34039e+07	3.72039e+07	34.7	24.65	51.57	51.41	5.95068e+06	2.83807e+06	4.88978e+06	3.3764e+06	2.0641e+06
FALSE	High	Master Protein	TGGT1_236040-t26_1-p1	transcript=TGGT1_236040-t26_1 | gene=TGGT1_236040 | organism=Toxoplasma_gondii_GT1 | gene_product=fructose-1,6-bisphosphate aldolase | transcript_product=fructose-1,6-bisphosphate aldolase | location=TGGT1_chrX:5139351-5141389(+) | protein_length=433 | sequence_SO=chromosome | SO=protein_coding	0	251.862	60	23	604	23	1	433	46.9	8.82	1057.71	23	1.206	1.056	0.0625995	0.269654	0.232613	0.400068	4.31	8.64	1.081	1.241	1.206	1.145	1.056	0.995	0.11	0.31	0.27	0.2	0.08	-0.01	4.57442e+06	5.51632e+06	6.11951e+07	6.46408e+07	23.42	17.82	58.57	52.12	5.28097e+06	3.26281e+06	4.57442e+06	5.70776e+06	4.04913e+06
FALSE	High	Master Protein	TGGT1_250770-t26_1-p1	transcript=TGGT1_250770-t26_1 | gene=TGGT1_250770 | organism=Toxoplasma_gondii_GT1 | gene_product=putative eukaryotic initiation factor-4A | transcript_product=putative eukaryotic initiation factor-4A | location=TGGT1_chrXII:5123731-5125767(-) | protein_length=412 | sequence_SO=chromosome | SO=protein_coding	0	249.879	67	25	363	25	1	412	46.6	5.67	571.23	25	1.036	0.81	0.332937	0.0198962	0.458116	0.149741	6.75	4.59	1.106	1.036	0.988	0.81	0.856	0.772	0.15	0.05	-0.02	-0.3	-0.22	-0.37	3.2457e+06	3.38018e+06	3.37022e+07	2.88417e+07	11.61	12.22	61.34	56.49	3.2457e+06	2.72196e+06	3.42001e+06	3.58996e+06	2.81864e+06
FALSE	High	Master Protein	TGGT1_411430-t26_1-p1	transcript=TGGT1_411430-t26_1 | gene=TGGT1_411430 | organism=Toxoplasma_gondii_GT1 | gene_product=rhoptry protein ROP5 | transcript_product=rhoptry protein ROP5 | location=AAQM03000489:189-1624(+) | protein_length=461 | sequence_SO=contig | SO=protein_coding	0	248.576	49	21	736	6	1	461	51.5	10.56	1223.01	21	0.588	0.787	0.202988	0.0907233	0.332608	0.210162	17.28	5.09	0.786	0.588	0.188	0.831	0.787	0.599	-0.35	-0.77	-2.41	-0.27	-0.35	-0.74	444931	261550	5.12568e+06	4.03477e+06	20.92	73.34	44.39	25.09	612900	444931	424576	481795	261550
FALSE	High	Master Protein	TGGT1_277270-t26_1-p1	transcript=TGGT1_277270-t26_1 | gene=TGGT1_277270 | organism=Toxoplasma_gondii_GT1 | gene_product=NTPase II | transcript_product=NTPase II | location=AAQM03000418:1-4939(+) | protein_length=862 | sequence_SO=contig | SO=protein_coding	0	246.989	49	22	312	7	1	862	95.7	6.74	607.82	22	0.99	1.017	0.461143	0.676681	0.553372	0.744166	1.51	2.92	1.617	0.979	0.99	0.88	1.017	1.037	0.69	-0.03	-0.02	-0.18	0.02	0.05	112046	181011	4.59955e+06	4.04713e+06	53.23	39.67	74.74	80.37	111974	261082	112046	181011	255663
FALSE	High	Master Protein	TGGT1_290950-t26_1-p1	transcript=TGGT1_290950-t26_1 | gene=TGGT1_290950 | organism=Toxoplasma_gondii_GT1 | gene_product=putative clathrin heavy chain | transcript_product=putative clathrin heavy chain | location=TGGT1_chrIX:3770246-3782423(-) | protein_length=1731 | sequence_SO=chromosome | SO=protein_coding	0	246.321	33	42	165	42	1	1731	194.4	6.06	188.19	42	0.254	0.724	0.106748	0.0065387	0.270515	0.149741	6.24	0.26	0.254	0.42	0.056	0.724	0.726	0.665	-1.97	-1.25	-4.17	-0.47	-0.46	-0.59	1.90646e+06	485147	9.39855e+06	6.80058e+06	51.67	45.6	65.97	60.56	1.90646e+06	1.31405e+06	3.57012e+06	485147	551818
FALSE	High	Master Protein	TGGT1_311470-t26_1-p1	transcript=TGGT1_311470-t26_1 | gene=TGGT1_311470 | organism=Toxoplasma_gondii_GT1 | gene_product=rhoptry neck protein RON5 | transcript_product=rhoptry neck protein RON5 | location=TGGT1_chrXI:2047692-2067010(-) | protein_length=1699 | sequence_SO=chromosome | SO=protein_coding	0	244.883	31	39	228	39	1	1699	186.9	8.46	219.14	39	0.634	0.694	0.929758	0.0421229	0.945988	0.166604	0.74	3.93	0.634	2.941	0.626	0.694	0.545	0.732	-0.66	1.56	-0.68	-0.53	-0.88	-0.45	557692	848983	2.05797e+07	1.12168e+07	67.79	49.83	39.02	46.09	1.33989e+06	373306	557692	848983	1.09772e+06
FALSE	High	Master Protein	TGGT1_223920-t26_1-p1	transcript=TGGT1_223920-t26_1 | gene=TGGT1_223920 | organism=Toxoplasma_gondii_GT1 | gene_product=rhoptry neck protein RON3 | transcript_product=rhoptry neck protein RON3 | location=TGGT1_chrX:3357300-3367973(+) | protein_length=1958 | sequence_SO=chromosome | SO=protein_coding	0	244.227	24	39	252	39	1	1958	222.9	9.16	193.31	39	0.679	0.659	0.13612	0.00804642	0.282094	0.149741	18.99	2.14	0.475	0.868	0.679	0.659	0.719	0.637	-1.07	-0.2	-0.56	-0.6	-0.48	-0.65	1.15165e+07	8.02344e+06	1.28355e+07	9.22597e+06	54.32	58.03	61.94	57.04	1.15165e+07	9.24413e+06	2.44075e+07	5.47549e+06	8.02344e+06
FALSE	High	Master Protein	TGGT1_289690-t26_1-p1	transcript=TGGT1_289690-t26_1 | gene=TGGT1_289690 | organism=Toxoplasma_gondii_GT1 | gene_product=glyceraldehyde-3-phosphate dehydrogenase GAPDH1 | transcript_product=glyceraldehyde-3-phosphate dehydrogenase GAPDH1 | location=TGGT1_chrIX:3189155-3191218(-) | protein_length=489 | sequence_SO=chromosome | SO=protein_coding	0	238.185	48	19	451	18	1	489	53.3	8.31	886.04	19	0.849	0.826	0.201992	0.0323179	0.332608	0.161762	5.43	3.66	0.849	0.806	1.005	0.826	0.796	0.89	-0.24	-0.31	0.01	-0.28	-0.33	-0.17	4.36914e+06	4.39119e+06	6.38249e+07	5.08306e+07	24.69	23.52	50.42	56.27	6.38907e+06	4.16833e+06	4.36914e+06	5.42478e+06	3.35926e+06
FALSE	High	Master Protein	TGGT1_219850-t26_1-p1	transcript=TGGT1_219850-t26_1 | gene=TGGT1_219850 | organism=Toxoplasma_gondii_GT1 | gene_product=prolyl-tRNA synthetase (ProRS) | transcript_product=prolyl-tRNA synthetase (ProRS) | location=TGGT1_chrXII:529404-538395(-) | protein_length=830 | sequence_SO=chromosome | SO=protein_coding	0	234.749	48	30	211	30	1	830	93.4	8.07	297.73	30	7.6	0.69	0.0142789	0.0056852	0.119681	0.149741	14.23	2.5	7.6	4.086	8.33	0.648	0.69	0.715	2.93	2.03	3.06	-0.63	-0.53	-0.48	563217	4.60138e+06	1.28272e+07	8.85361e+06	16.14	44.58	67.9	72.03	605437	439012	563217	4.60138e+06	1.79392e+06
FALSE	High	Master Protein	TGGT1_261950-t26_1-p1	transcript=TGGT1_261950-t26_1 | gene=TGGT1_261950 | organism=Toxoplasma_gondii_GT1 | gene_product=ATP synthase beta subunit ATP-B | transcript_product=ATP synthase beta subunit ATP-B | location=TGGT1_chrVIIb:1457013-1460114(-) | protein_length=560 | sequence_SO=chromosome | SO=protein_coding	0	232.439	61	23	258	23	1	560	59.9	6.87	442.37	23	0.883	0.804	0.451955	0.0924441	0.548986	0.210305	34.13	7.25	0.883	1.143	0.522	0.804	0.865	0.648	-0.18	0.19	-0.94	-0.31	-0.21	-0.63	1.66549e+06	1.40328e+06	2.00669e+07	1.73584e+07	51.76	19.06	83.1	67.68	1.66549e+06	885764	2.68839e+06	1.46981e+06	1.01273e+06
FALSE	High	Master Protein	TGGT1_204050-t26_1-p1	transcript=TGGT1_204050-t26_1 | gene=TGGT1_204050 | organism=Toxoplasma_gondii_GT1 | gene_product=subtilisin SUB1 | transcript_product=subtilisin SUB1 | location=TGGT1_chrVIIa:1932241-1938144(+) | protein_length=795 | sequence_SO=chromosome | SO=protein_coding	0	231.905	56	27	316	27	1	795	85	5.39	463.89	27	1.372	1.042	0.202042	0.407927	0.332608	0.526292	38.37	10.06	1.017	1.372	1.782	0.972	1.042	1.433	0.02	0.46	0.83	-0.04	0.06	0.52	2.84949e+06	3.93569e+06	1.87787e+07	1.95746e+07	42.86	40.77	32.77	55.65	3.87064e+06	1.52225e+06	2.84949e+06	3.93569e+06	2.08832e+06
FALSE	High	Master Protein	TGGT1_233460-t26_1-p1	transcript=TGGT1_233460-t26_1 | gene=TGGT1_233460 | organism=Toxoplasma_gondii_GT1 | gene_product=SAG-related sequence SRS29B | transcript_product=SAG-related sequence SRS29B | location=TGGT1_chrVIII:2660455-2661465(+) | protein_length=336 | sequence_SO=chromosome | SO=protein_coding	0	228.16	68	18	892	18	1	336	34.8	8.02	1588.12	18	0.615	0.611	0.00918389	0.0451849	0.111942	0.166604	4.56	0.65	0.615	0.565	0.665	0.604	0.611	0.795	-0.7	-0.82	-0.59	-0.73	-0.71	-0.33	4.16243e+07	2.76841e+07	2.38901e+08	1.45894e+08	48.34	50.92	37.5	54.99	5.3096e+07	1.76201e+07	4.16243e+07	3.26487e+07	9.9542e+06
FALSE	High	Master Protein	TGGT1_316400B-t26_1-p1	transcript=TGGT1_316400B-t26_1 | gene=TGGT1_316400B | organism=Toxoplasma_gondii_GT1 | gene_product=alpha tubulin TUBA1 | transcript_product=alpha tubulin TUBA1 | location=TGGT1_chrXI:5219470-5220918(+) | protein_length=432 | sequence_SO=chromosome | SO=protein_coding	0	224.993	52	18	436	18	1	432	47.8	5.05	652.42	18	0.544	0.698	0.00681107	0.0629753	0.0926306	0.183795	3.16	9.31	0.583	0.544	0.489	0.698	0.833	0.608	-0.78	-0.88	-1.03	-0.52	-0.26	-0.72	4.99055e+06	2.91158e+06	5.6603e+07	4.71749e+07	40.63	31.76	72.69	59.08	4.99055e+06	4.61328e+06	9.20115e+06	2.91158e+06	2.51098e+06
FALSE	High	Master Protein	TGGT1_288650-t26_1-p1	transcript=TGGT1_288650-t26_1 | gene=TGGT1_288650 | organism=Toxoplasma_gondii_GT1 | gene_product=dense granule protein GRA12 | transcript_product=dense granule protein GRA12 | location=TGGT1_chrIX:2467879-2469672(-) | protein_length=436 | sequence_SO=chromosome | SO=protein_coding	0	223.955	49	18	422	18	1	436	47.9	9.2	712.72	18	1.046	0.787	0.986391	0.0484951	0.988815	0.167678	19.86	0.24	0.812	1.046	1.186	0.787	0.789	0.637	-0.3	0.06	0.25	-0.35	-0.34	-0.65	3.07988e+06	3.652e+06	5.44621e+07	4.29602e+07	40.7	28.25	59.22	45.54	4.74962e+06	2.08751e+06	3.07988e+06	3.85523e+06	2.18291e+06
FALSE	High	Master Protein	TGGT1_211680-t26_1-p1	transcript=TGGT1_211680-t26_1 | gene=TGGT1_211680 | organism=Toxoplasma_gondii_GT1 | gene_product=protein disulfide isomerase | transcript_product=protein disulfide isomerase | location=TGGT1_chrIV:1556190-1558014(+) | protein_length=471 | sequence_SO=chromosome | SO=protein_coding	0	223.249	54	26	358	26	1	471	52.8	5.22	598.73	26	0.735	0.964	0.130958	0.209336	0.280298	0.336795	12.35	2.95	0.735	0.849	0.504	0.985	0.964	0.89	-0.44	-0.24	-0.99	-0.02	-0.05	-0.17	5.13348e+06	3.67979e+06	32567000	3.20678e+07	66.28	53.04	91.48	86.4	5.13348e+06	1.30431e+06	7.29532e+06	3.77458e+06	1.1068e+06
FALSE	High	Master Protein	TGGT1_363030-t26_1-p1	transcript=TGGT1_363030-t26_1 | gene=TGGT1_363030 | organism=Toxoplasma_gondii_GT1 | gene_product=rhoptry protein ROP8 | transcript_product=rhoptry protein ROP8 | location=AAQM03000199:1511-3196(+) | protein_length=561 | sequence_SO=contig | SO=protein_coding	0	221.617	46	23	478	19	1	561	64	7.93	695.45	23	1.808	0.96	0.0873909	0.372458	0.258509	0.498239	22.48	8.44	1.217	1.808	2.082	0.96	1.02	0.842	0.28	0.85	1.06	-0.06	0.03	-0.25	2.1362e+06	4.44842e+06	3.89499e+07	3.97105e+07	52.75	29.55	57.08	47.13	4.10753e+06	1.49643e+06	2.1362e+06	4.99922e+06	2.70593e+06
FALSE	High	Master Protein	TGGT1_318230-t26_1-p1	transcript=TGGT1_318230-t26_1 | gene=TGGT1_318230 | organism=Toxoplasma_gondii_GT1 | gene_product=phosphoglycerate kinase PGKI | transcript_product=phosphoglycerate kinase PGKI | location=TGGT1_chrIV:1413955-1416908(+) | protein_length=417 | sequence_SO=chromosome | SO=protein_coding	0	220.826	69	27	274	27	1	417	44.6	6.99	360.39	27	0.797	0.906	0.258039	0.155761	0.388487	0.282253	10.94	7.47	1.039	0.797	0.704	0.906	0.982	0.85	0.06	-0.33	-0.51	-0.14	-0.03	-0.23	1.58589e+06	1.11692e+06	1.69196e+07	1.59069e+07	25.13	37.3	85.6	79.47	1.60383e+06	988735	1.58589e+06	1.66693e+06	787878
FALSE	High	Master Protein	TGGT1_263090-t26_1-p1	transcript=TGGT1_263090-t26_1 | gene=TGGT1_263090 | organism=Toxoplasma_gondii_GT1 | gene_product=14-3-3 protein | transcript_product=14-3-3 protein | location=TGGT1_chrVIIb:786880-789511(+) | protein_length=323 | sequence_SO=chromosome | SO=protein_coding	0	219.504	58	20	529	20	1	323	37.2	5.14	852.07	20	0.739	0.819	0.0286047	0.0350151	0.188237	0.162729	4.94	0.63	0.739	0.694	0.823	0.819	0.825	0.715	-0.44	-0.53	-0.28	-0.29	-0.28	-0.48	9.32473e+06	7.67409e+06	7.95847e+07	6.56218e+07	15.76	20.38	63.62	54.91	1.04285e+07	7.58088e+06	9.32473e+06	7.70976e+06	5.26306e+06
FALSE	High	Master Protein	TGGT1_290670-t26_1-p1	transcript=TGGT1_290670-t26_1 | gene=TGGT1_290670 | organism=Toxoplasma_gondii_GT1 | gene_product=leucyl aminopeptidase LAP | transcript_product=leucyl aminopeptidase LAP | location=TGGT1_chrIX:3637150-3642271(+) | protein_length=781 | sequence_SO=chromosome | SO=protein_coding	0	214.682	43	25	266	25	1	781	83.1	8.88	406.87	25	0.637	0.761	0.346132	0.0028732	0.467621	0.141622	7.11	1.41	1.191	0.562	0.637	0.761	0.786	0.749	0.25	-0.83	-0.65	-0.39	-0.35	-0.42	1.27882e+06	805368	1.98833e+07	1.56305e+07	5.97	49.61	54.44	52.35	1.40666e+06	1.27882e+06	1.26367e+06	1.67561e+06	718840
FALSE	High	Master Protein	TGGT1_251780-t26_1-p1	transcript=TGGT1_251780-t26_1 | gene=TGGT1_251780 | organism=Toxoplasma_gondii_GT1 | gene_product=heat shock protein | transcript_product=heat shock protein | location=TGGT1_chrXII:5504595-5509577(-) | protein_length=728 | sequence_SO=chromosome | SO=protein_coding	0	213.966	47	25	219	25	1	728	78.2	7.17	339.76	25	0.292	0.798	0.166187	0.0548814	0.303781	0.174934	5.28	9.08	0.889	0.17	0.292	0.875	0.721	0.798	-0.17	-2.56	-1.78	-0.19	-0.47	-0.32	1.95854e+06	571797	1.34191e+07	1.13544e+07	38.04	40.7	56.93	57.28	948596	2.13172e+06	1.95854e+06	843274	362311
FALSE	High	Master Protein	TGGT1_247550-t26_1-p1	transcript=TGGT1_247550-t26_1 | gene=TGGT1_247550 | organism=Toxoplasma_gondii_GT1 | gene_product=heat shock protein HSP60 | transcript_product=heat shock protein HSP60 | location=TGGT1_chrXII:3342084-3346052(-) | protein_length=575 | sequence_SO=chromosome | SO=protein_coding	0	209.694	58	26	263	26	1	575	60.9	5.97	403.5	26	1.076	0.836	0.741534	0.0704465	0.796173	0.190346	97.11	3.46	1.076	0.371	6.44	0.836	0.864	0.704	0.11	-1.43	2.69	-0.26	-0.21	-0.51	992318	1.8768e+06	2.2767e+07	1.90252e+07	54.12	83.61	57.84	45.71	1.74409e+06	992318	567095	1.8768e+06	368417
FALSE	High	Master Protein	TGGT1_216670-t26_1-p1	transcript=TGGT1_216670-t26_1 | gene=TGGT1_216670 | organism=Toxoplasma_gondii_GT1 | gene_product=FUSE-binding protein 2 / KH-type splicing regulatory protein | transcript_product=FUSE-binding protein 2 / KH-type splicing regulatory protein | location=TGGT1_chrXI:5891708-5895741(-) | protein_length=941 | sequence_SO=chromosome | SO=protein_coding	0	209.13	56	36	206	36	1	941	100	8.95	251.1	36	0.65	0.703	0.225005	0.0318459	0.357207	0.161762	26.93	6.84	0.971	0.37	0.65	0.769	0.703	0.609	-0.04	-1.43	-0.62	-0.38	-0.51	-0.72	1.25845e+06	817827	1.15979e+07	8.15159e+06	11.57	34.86	83.85	72.96	1.11957e+06	1.4119e+06	1.25845e+06	1.0868e+06	522882
FALSE	High	Master Protein	TGGT1_306060-t26_1-p1	transcript=TGGT1_306060-t26_1 | gene=TGGT1_306060 | organism=Toxoplasma_gondii_GT1 | gene_product=rhoptry neck protein RON8 | transcript_product=rhoptry neck protein RON8 | location=TGGT1_chrIX:5560917-5575203(-) | protein_length=2980 | sequence_SO=chromosome | SO=protein_coding	0	191.076	18	35	101	35	1	2980	328.8	8.4	122.06	35	0.064	0.896	0.00910114	0.237942	0.111942	0.364963	0.05	5.78	0.07	0.064	0.028	0.896	0.939	0.624	-3.84	-3.96	-5.14	-0.16	-0.09	-0.68	3.91391e+06	251052	5.0034e+06	4.69859e+06	30.35	19.93	80.08	56.28	3.78292e+06	3.91391e+06	6.2981e+06	263747	251052
FALSE	High	Master Protein	TGGT1_226730-t26_1-p1	transcript=TGGT1_226730-t26_1 | gene=TGGT1_226730 | organism=Toxoplasma_gondii_GT1 | gene_product=aconitate hydratase ACN/IRP | transcript_product=aconitate hydratase ACN/IRP | location=TGGT1_chrX:1308814-1316049(-) | protein_length=1055 | sequence_SO=chromosome | SO=protein_coding	0	190.589	40	36	136	36	1	1055	114.8	8.37	132.41	36	0.74	0.906	0.30817	0.179998	0.430594	0.304599	25.72	4.1	0.74	0.974	0.231	0.906	0.936	0.726	-0.43	-0.04	-2.11	-0.14	-0.1	-0.46	616365	505551	7.57745e+06	7.09327e+06	16.54	55.43	75.15	60.28	723744	518863	616365	535457	505551
FALSE	High	Master Protein	TGGT1_219310-t26_1-p1	transcript=TGGT1_219310-t26_1 | gene=TGGT1_219310 | organism=Toxoplasma_gondii_GT1 | gene_product=DnaK family protein | transcript_product=DnaK family protein | location=TGGT1_chrXII:915528-922343(+) | protein_length=818 | sequence_SO=chromosome | SO=protein_coding	0	188.475	43	28	183	28	1	818	90.1	5.35	214.88	28	0.997	0.759	0.558703	0.124301	0.640909	0.248602	24.02	3.72	0.997	0.514	1.159	0.759	0.952	0.726	0	-0.96	0.21	-0.4	-0.07	-0.46	653615	550241	1.14793e+07	1.09271e+07	25.45	41.23	75.96	66.21	801671	653615	474688	798965	336132
FALSE	High	Master Protein	TGGT1_209950-t26_1-p1	transcript=TGGT1_209950-t26_1 | gene=TGGT1_209950 | organism=Toxoplasma_gondii_GT1 | gene_product=putative thioredoxin | transcript_product=putative thioredoxin | location=TGGT1_chrIb:1585569-1589285(-) | protein_length=424 | sequence_SO=chromosome | SO=protein_coding	0	187.794	54	20	233	20	1	424	47.7	8.34	363.77	20	0.614	0.732	0.191479	0.0137928	0.325734	0.149741	7.49	5.04	0.614	0.696	0.17	0.732	0.778	0.684	-0.7	-0.52	-2.55	-0.45	-0.36	-0.55	1.57039e+06	963439	1.79156e+07	1.39436e+07	125.95	56.89	86.75	80.93	1.57039e+06	832210	1.07278e+07	963439	579094
FALSE	High	Master Protein	TGGT1_216860-t26_1-p1	transcript=TGGT1_216860-t26_1 | gene=TGGT1_216860 | organism=Toxoplasma_gondii_GT1 | gene_product=DEAD (Asp-Glu-Ala-Asp) box polypeptide DDX39 | transcript_product=DEAD (Asp-Glu-Ala-Asp) box polypeptide DDX39 | location=TGGT1_chrXI:5764687-5768776(+) | protein_length=434 | sequence_SO=chromosome | SO=protein_coding	0	186.469	54	17	216	17	1	434	49.1	5.85	282.55	17	1.393	0.789	0.10629	0.0911258	0.270515	0.210162	11.79	7.96	1.089	1.393	1.504	0.789	0.857	0.629	0.12	0.48	0.59	-0.34	-0.22	-0.67	1.19568e+06	1.59582e+06	1.76337e+07	1.51107e+07	26.82	20.98	74.95	58.22	1.46604e+06	841553	1.19568e+06	1.59582e+06	1.17262e+06
FALSE	High	Master Protein	TGGT1_229480-t26_1-p1	transcript=TGGT1_229480-t26_1 | gene=TGGT1_229480 | organism=Toxoplasma_gondii_GT1 | gene_product=putative calcium binding protein precursor | transcript_product=putative calcium binding protein precursor | location=TGGT1_chrVIII:289042-291582(-) | protein_length=335 | sequence_SO=chromosome | SO=protein_coding	0	184.797	65	15	275	15	1	335	38.3	4.69	376.36	15	0.493	0.698	0.0101516	0.0350984	0.111942	0.162729	1.25	0.66	0.51	0.493	0.397	0.705	0.698	0.544	-0.97	-1.02	-1.33	-0.51	-0.52	-0.88	2.40143e+06	1.18291e+06	2.42795e+07	1.69511e+07	29.69	14.98	86.44	71.45	2.29942e+06	2.40143e+06	3.80566e+06	1.17211e+06	1.18291e+06
FALSE	High	Master Protein	TGGT1_288360-t26_1-p1	transcript=TGGT1_288360-t26_1 | gene=TGGT1_288360 | organism=Toxoplasma_gondii_GT1 | gene_product=tryptophanyl-tRNA synthetase (TrpRS2) | transcript_product=tryptophanyl-tRNA synthetase (TrpRS2) | location=TGGT1_chrIX:2284649-2289081(+) | protein_length=689 | sequence_SO=chromosome | SO=protein_coding	0	183.889	44	23	283	23	1	689	77	7.3	426.53	23	0.279	0.868	0.0658002	0.00834794	0.232613	0.149741	1.44	0.2	0.611	0.244	0.279	0.866	0.899	0.868	-0.71	-2.03	-1.84	-0.21	-0.15	-0.21	4.24481e+06	1.55954e+06	1.89432e+07	1.64033e+07	16.59	45.67	65.37	64.32	4.23553e+06	4.24481e+06	5.58787e+06	2.58861e+06	1.03714e+06
FALSE	High	Master Protein	TGGT1_360830-t26_1-p1	transcript=TGGT1_360830-t26_1 | gene=TGGT1_360830 | organism=Toxoplasma_gondii_GT1 | gene_product=nucleoside-triphosphatase | transcript_product=nucleoside-triphosphatase | location=AAQM03000066:41-1153(+) | protein_length=370 | sequence_SO=contig | SO=protein_coding	0	183.432	59	17	275	6	1	370	40.5	5.22	532.04	17	0.031	0.995					0.1	8.04	0.074	0.031	0.01	0.823	0.995	1.05	-3.75	-5.02	-6.64	-0.28	-0.01	0.07	1.98063e+06	64860.8	3.12329e+06	3.10809e+06	41.9	8.14	36.2	46.28	923675	1.98063e+06	2.32556e+06	68706.8	61230.1
FALSE	High	Master Protein	TGGT1_266640-t26_1-p1	transcript=TGGT1_266640-t26_1 | gene=TGGT1_266640 | organism=Toxoplasma_gondii_GT1 | gene_product=putative Acetyl-coenzyme A synthetase 2 | transcript_product=putative Acetyl-coenzyme A synthetase 2 | location=TGGT1_chrIX:887254-895827(+) | protein_length=714 | sequence_SO=chromosome | SO=protein_coding	0	182.049	38	22	198	22	1	714	79.9	6.89	286.72	22	1.01	1.045	0.599329	0.6447	0.671776	0.718682	18.36	7.19	1.01	0.885	1.505	1.096	0.939	1.045	0.01	-0.18	0.59	0.13	-0.09	0.06	793025	962675	1.6475e+07	1.54755e+07	41.94	34.53	61.92	63.75	1.38595e+06	793025	639808	1.39969e+06	701686
FALSE	High	Master Protein	TGGT1_270510-t26_1-p1	transcript=TGGT1_270510-t26_1 | gene=TGGT1_270510 | organism=Toxoplasma_gondii_GT1 | gene_product=asparaginyl-tRNA synthetase (NOB+tRNA synthase) | transcript_product=asparaginyl-tRNA synthetase (NOB+tRNA synthase) | location=TGGT1_chrVIII:5218409-5221722(+) | protein_length=676 | sequence_SO=chromosome | SO=protein_coding	0	170.9	37	25	410	25	1	676	74.9	8.03	676.58	25	5.259	0.843	0.0152535	0.0380802	0.119681	0.166604	22.2	3.6	3.205	6.047	5.259	0.843	0.814	0.907	1.68	2.6	2.39	-0.25	-0.3	-0.14	3.1525e+06	1.22749e+07	2.81726e+07	2.37548e+07	23.96	26.84	66.21	71.84	3.1525e+06	2.03002e+06	3.23113e+06	1.01044e+07	1.22749e+07
FALSE	High	Master Protein	TGGT1_295110-t26_1-p1	transcript=TGGT1_295110-t26_1 | gene=TGGT1_295110 | organism=Toxoplasma_gondii_GT1 | gene_product=rhoptry protein ROP7 | transcript_product=rhoptry protein ROP7 | location=AAQM03000462:293-2020(-) | protein_length=575 | sequence_SO=contig | SO=protein_coding	0	170.171	45	21	337	12	1	575	63.4	7.01	550.65	21	0.884	0.978	0.116152	0.84466	0.275441	0.879136	6.04	21.99	0.93	0.768	0.884	1.16	0.978	0.826	-0.1	-0.38	-0.18	0.21	-0.03	-0.28	1.5366e+06	1.35842e+06	9.13904e+06	8.93351e+06	40.16	46.43	81.1	65.69	1.58017e+06	679007	1.5366e+06	1.46977e+06	521342
FALSE	High	Master Protein	TGGT1_290290-t26_1-p1	transcript=TGGT1_290290-t26_1 | gene=TGGT1_290290 | organism=Toxoplasma_gondii_GT1 | gene_product=ubiquitin-activating enzyme E1 family protein | transcript_product=ubiquitin-activating enzyme E1 family protein | location=TGGT1_chrIX:3489378-3499339(+) | protein_length=1092 | sequence_SO=chromosome | SO=protein_coding	0	167.968	32	25	124	25	1	1092	119.7	5.8	158.39	25	1.587	0.992	0.969539	0.407932	0.975062	0.526292	23.36	0.05	1.837	0.367	1.587	0.992	0.992	0.532	0.88	-1.45	0.67	-0.01	-0.01	-0.91	630336	568209	7.24744e+06	7.18785e+06	72.18	45.4	85.61	46.87	630336	1.50727e+06	358117	1.15768e+06	552803
FALSE	High	Master Protein	TGGT1_291960-t26_1-p1	transcript=TGGT1_291960-t26_1 | gene=TGGT1_291960 | organism=Toxoplasma_gondii_GT1 | gene_product=rhoptry kinase family protein ROP40 (incomplete catalytic triad) | transcript_product=rhoptry kinase family protein ROP40 (incomplete catalytic triad) | location=TGGT1_chrIX:4241532-4244563(+) | protein_length=525 | sequence_SO=chromosome | SO=protein_coding	0	166.516	46	18	238	18	1	525	57.9	7.43	378.01	18	0.481	0.699	0.206628	0.00184251	0.336976	0.141622	7.07	0.07	0.481	0.055	0.58	0.698	0.699	0.73	-1.06	-4.18	-0.79	-0.52	-0.52	-0.45	2.48552e+06	1.19529e+06	2.13579e+07	1.4924e+07	81.28	46.62	54.44	57.25	2.48552e+06	9.07578e+06	2.48402e+06	1.19529e+06	501022
FALSE	High	Master Protein	TGGT1_292080-t26_1-p1	transcript=TGGT1_292080-t26_1 | gene=TGGT1_292080 | organism=Toxoplasma_gondii_GT1 | gene_product=leucyl-tRNA synthetase | transcript_product=leucyl-tRNA synthetase | location=TGGT1_chrIX:4343158-4354677(+) | protein_length=1261 | sequence_SO=chromosome | SO=protein_coding	0	165.645	27	26	107	26	1	1261	141.2	6.96	141.79	26	0.85	0.727	0.282164	0.0148084	0.406794	0.149741	12.75	0.37	0.85	0.749	1.037	0.73	0.637	0.727	-0.23	-0.42	0.05	-0.45	-0.65	-0.46	780359	584760	7.72753e+06	4.92496e+06	31.25	47.76	70.77	74.74	668788	780359	1.19095e+06	568799	584760
FALSE	High	Master Protein	TGGT1_249900-t26_1-p1	transcript=TGGT1_249900-t26_1 | gene=TGGT1_249900 | organism=Toxoplasma_gondii_GT1 | gene_product=putative adenine nucleotide translocator | transcript_product=putative adenine nucleotide translocator | location=TGGT1_chrXII:4873424-4874380(+) | protein_length=318 | sequence_SO=chromosome | SO=protein_coding	0	165.298	63	18	264	18	1	318	35.2	9.74	383.06	18	0.659	0.704	0.1462	0.0532725	0.288161	0.173881	7.75	8.15	0.659	0.738	0.311	0.626	0.827	0.704	-0.6	-0.44	-1.68	-0.68	-0.27	-0.51	1.36502e+06	495138	2.14461e+07	1.69947e+07	37.7	39.13	77.63	76.16	1.36502e+06	670476	1.49664e+06	899865	495138
FALSE	High	Master Protein	TGGT1_268850-t26_1-p1	transcript=TGGT1_268850-t26_1 | gene=TGGT1_268850 | organism=Toxoplasma_gondii_GT1 | gene_product=enolase 2 | transcript_product=enolase 2 | location=TGGT1_chrVIII:6248823-6250901(-) | protein_length=475 | sequence_SO=chromosome | SO=protein_coding	0	162.918	36	14	178	14	1	475	52.1	6.84	374.77	14	2.062	0.951	0.039508	0.431666	0.206657	0.546956	30.72	14.16	2.062	1.635	2.769	0.951	1.051	0.693	1.04	0.71	1.47	-0.07	0.07	-0.53	1.33562e+06	2.75378e+06	1.43695e+07	1.51026e+07	38.21	63.58	92.86	71.22	1.33562e+06	980422	2.0772e+06	2.75378e+06	1.60259e+06
FALSE	High	Master Protein	TGGT1_231850-t26_1-p1	transcript=TGGT1_231850-t26_1 | gene=TGGT1_231850 | organism=Toxoplasma_gondii_GT1 | gene_product=serine-threonine phosophatase 2C (PP2C) | transcript_product=serine-threonine phosophatase 2C (PP2C) | location=TGGT1_chrVIII:1583236-1586735(+) | protein_length=331 | sequence_SO=chromosome | SO=protein_coding	0	162.611	63	15	200	15	1	331	36.8	5.71	313.88	15	0.066	0.635	0.00533437	0.0385166	0.0837086	0.166604	0.16	4.78	0.083	0.041	0.066	0.775	0.635	0.584	-3.59	-4.59	-3.91	-0.37	-0.66	-0.78	9.89083e+06	657572	19665920	1.24874e+07	2.07	31.07	68.04	56.71	9.67432e+06	1.00831e+07	9.89083e+06	802509	417488
FALSE	High	Master Protein	TGGT1_309120-t26_1-p1	transcript=TGGT1_309120-t26_1 | gene=TGGT1_309120 | organism=Toxoplasma_gondii_GT1 | gene_product=ribosomal protein RPL4 | transcript_product=ribosomal protein RPL4 | location=TGGT1_chrXI:476484-477734(-) | protein_length=416 | sequence_SO=chromosome | SO=protein_coding	0	153.933	44	16	230	16	1	416	45.7	11.18	382.49	16	0.629	0.827	0.121697	0.105511	0.275847	0.227893	12.59	10	0.764	0.361	0.629	0.827	0.934	0.746	-0.39	-1.47	-0.67	-0.27	-0.1	-0.42	2.11119e+06	1.61319e+06	1.76066e+07	1.45655e+07	36.44	55.93	76.5	66.38	2.11119e+06	1.22492e+06	2.67233e+06	1.61319e+06	442075
FALSE	High	Master Protein	TGGT1_232250-t26_1-p1	transcript=TGGT1_232250-t26_1 | gene=TGGT1_232250 | organism=Toxoplasma_gondii_GT1 | gene_product=catalase | transcript_product=catalase | location=TGGT1_chrVIII:1969434-1975537(-) | protein_length=502 | sequence_SO=chromosome | SO=protein_coding	0	153.39	51	20	150	20	1	502	57.2	7.2	205.27	20	0.562	0.914	0.433427	0.512429	0.535874	0.609537	2.99	14.46	1.372	0.527	0.562	1.097	0.914	0.807	0.46	-0.93	-0.83	0.13	-0.13	-0.31	577539	354488	7.95554e+06	7.27126e+06	7.09	57.2	107.25	96.94	577539	548373	630256	792245	288783
FALSE	High	Master Protein	TGGT1_231630-t26_1-p1	transcript=TGGT1_231630-t26_1 | gene=TGGT1_231630 | organism=Toxoplasma_gondii_GT1 | gene_product=alveolin domain containing intermediate filament IMC4 | transcript_product=alveolin domain containing intermediate filament IMC4 | location=TGGT1_chrVIII:1508307-1510463(-) | protein_length=452 | sequence_SO=chromosome | SO=protein_coding	0	153.18	50	14	300	14	1	452	50.1	5.95	487.54	14	0.772	0.726	0.176849	0.14	0.311986	0.266313	7.45	7.19	0.772	0.988	0.707	0.726	0.952	0.659	-0.37	-0.02	-0.5	-0.46	-0.07	-0.6	3.0632e+06	2.3656e+06	2.74299e+07	2.61078e+07	27.74	12.12	58.95	46.14	3.0632e+06	2.02335e+06	3.60435e+06	2.3656e+06	2.00006e+06
FALSE	High	Master Protein	TGGT1_226830-t26_1-p1	transcript=TGGT1_226830-t26_1 | gene=TGGT1_226830 | organism=Toxoplasma_gondii_GT1 | gene_product=DnaK family protein | transcript_product=DnaK family protein | location=TGGT1_chrX:1215623-1218481(-) | protein_length=952 | sequence_SO=chromosome | SO=protein_coding	0	151.1	33	23	133	23	1	952	104.9	5.95	159.11	23	0.64	0.616	0.173066	0.0178936	0.309891	0.149741	22.03	2.32	0.872	0.64	0.365	0.59	0.616	0.72	-0.2	-0.64	-1.45	-0.76	-0.7	-0.47	1.04694e+06	670285	9.64641e+06	5.93782e+06	28.01	17.92	45.77	57.16	926535	1.04694e+06	1.54628e+06	808268	670285
FALSE	High	Master Protein	TGGT1_294200-t26_1-p1	transcript=TGGT1_294200-t26_1 | gene=TGGT1_294200 | organism=Toxoplasma_gondii_GT1 | gene_product=glucose-6-phosphate 1-dehydrogenase | transcript_product=glucose-6-phosphate 1-dehydrogenase | location=TGGT1_chrIa:683542-690397(+) | protein_length=560 | sequence_SO=chromosome | SO=protein_coding	0	144.648	50	22	157	21	1	560	62.7	7.61	218.7	22	0.784	1.038	0.825868	0.336717	0.866206	0.459467	15.47	5.93	0.651	0.784	1.595	1.038	0.997	1.228	-0.62	-0.35	0.67	0.05	0	0.3	139296	149561	8.02865e+06	8.00362e+06	103.34	73.27	35.79	47.29	629933	139296	93773.4	410319	109263
FALSE	High	Master Protein	TGGT1_225050-t26_1-p1	transcript=TGGT1_225050-t26_1 | gene=TGGT1_225050 | organism=Toxoplasma_gondii_GT1 | gene_product=putative adenosylhomocysteinase | transcript_product=putative adenosylhomocysteinase | location=TGGT1_chrX:2464799-2467238(-) | protein_length=588 | sequence_SO=chromosome | SO=protein_coding	0	144.575	35	16	179	16	1	588	64.1	7.71	241.37	16	0.828	0.788	0.328344	0.0137403	0.454116	0.149741	28.19	0.28	0.828	0.558	1.058	0.788	0.791	0.718	-0.27	-0.84	0.08	-0.34	-0.34	-0.48	1.10598e+06	823876	1.66392e+07	1.31562e+07	21.2	22.79	78.94	73.18	1.19044e+06	1.10598e+06	779020	985612	617691
FALSE	High	Master Protein	TGGT1_294620-t26_1-p1	transcript=TGGT1_294620-t26_1 | gene=TGGT1_294620 | organism=Toxoplasma_gondii_GT1 | gene_product=putative eukaryotic initiation factor-3, subunit 8 | transcript_product=putative eukaryotic initiation factor-3, subunit 8 | location=TGGT1_chrIa:989669-996523(-) | protein_length=971 | sequence_SO=chromosome | SO=protein_coding	0	143.524	27	20	103	20	1	971	109.1	6.32	129.86	20	0.946	0.872					103.45	21.55	0.946	0.208	100	0.872	1.038	0.681	-0.08	-2.27	6.64	-0.2	0.05	-0.55	428345	263561	4.48193e+06	4.65432e+06	51.09	36.46	89.88	69.94	293422	625309		277443	129820
FALSE	High	Master Protein	TGGT1_230940-t26_1-p1	transcript=TGGT1_230940-t26_1 | gene=TGGT1_230940 | organism=Toxoplasma_gondii_GT1 | gene_product=hypothetical protein | transcript_product=hypothetical protein | location=TGGT1_chrVIII:1112065-1119747(+) | protein_length=1523 | sequence_SO=chromosome | SO=protein_coding	0	143.495	28	24	95	24	1	1523	155.1	9.44	101.91	24	1.788	0.622	0.125921	0.190776	0.280298	0.316409	8.98	3.91	1.679	5.027	1.788	0.58	1.007	0.622	0.75	2.33	0.84	-0.79	0.01	-0.68	239897	428840	3.56762e+06	3.59131e+06	8.11	58.48	86.12	73.12	251034	213903	239897	421572	1.07538e+06
FALSE	High	Master Protein	TGGT1_286580-t26_1-p1	transcript=TGGT1_286580-t26_1 | gene=TGGT1_286580 | organism=Toxoplasma_gondii_GT1 | gene_product=hypothetical protein | transcript_product=hypothetical protein | location=TGGT1_chrV:1631039-1633906(-) | protein_length=955 | sequence_SO=chromosome | SO=protein_coding	0	136.905	36	25	131	25	1	955	107.2	5.63	134.73	25	0.572	0.833	0.0311448	0.0313172	0.200625	0.161762	0.13	1.17	0.572	0.57	0.738	0.823	0.903	0.833	-0.81	-0.81	-0.44	-0.28	-0.15	-0.26	558616	381655	8.96457e+06	8.09234e+06	11.08	12.27	60.52	58.5	667725	558616	549966	381655	318462
FALSE	High	Master Protein	TGGT1_278830-t26_1-p1	transcript=TGGT1_278830-t26_1 | gene=TGGT1_278830 | organism=Toxoplasma_gondii_GT1 | gene_product=glucose-6-phosphate 1-dehydrogenase | transcript_product=glucose-6-phosphate 1-dehydrogenase | location=TGGT1_chrXII:5748919-5762087(+) | protein_length=878 | sequence_SO=chromosome | SO=protein_coding	0	136.801	41	25	85	24	1	878	98.2	7.25	79.56	25	0.711	0.865	0.163311	0.0136868	0.303692	0.149741	21.48	2.8	0.915	0.506	0.711	0.893	0.843	0.865	-0.13	-0.98	-0.49	-0.16	-0.25	-0.21	415600	210145	3.76494e+06	3.35607e+06	33.53	52.51	89.15	88.93	465218	415600	229738	425459	210145
FALSE	High	Master Protein	TGGT1_214080-t26_1-p1	transcript=TGGT1_214080-t26_1 | gene=TGGT1_214080 | organism=Toxoplasma_gondii_GT1 | gene_product=toxofilin | transcript_product=toxofilin | location=TGGT1_chrX:5904318-5905055(+) | protein_length=245 | sequence_SO=chromosome | SO=protein_coding	0	134.34	64	15	365	15	1	245	27.1	9.57	667.76	15	0.716	0.746	0.0147717	0.0113339	0.119681	0.149741	0.18	1.24	0.718	0.716	0.623	0.735	0.807	0.746	-0.48	-0.48	-0.68	-0.44	-0.31	-0.42	4.30745e+06	2.68552e+06	3.66976e+07	2.96274e+07	29.66	33.47	57.93	55.92	6.23323e+06	3.53118e+06	4.30745e+06	4.47463e+06	2.52896e+06
FALSE	High	Master Protein	TGGT1_219320-t26_1-p1	transcript=TGGT1_219320-t26_1 | gene=TGGT1_219320 | organism=Toxoplasma_gondii_GT1 | gene_product=acid phosphatase GAP50 | transcript_product=acid phosphatase GAP50 | location=TGGT1_chrXII:907511-910397(-) | protein_length=431 | sequence_SO=chromosome | SO=protein_coding	0	131.966	32	12	221	12	1	431	46.6	6.95	484.02	12	0.747	0.792	0.139568	0.0188484	0.282094	0.149741	2.1	2.04	0.728	0.965	0.747	0.809	0.792	0.72	-0.46	-0.05	-0.42	-0.31	-0.34	-0.47	2.55988e+06	1.86484e+06	4.85551e+07	3.84543e+07	26.15	14	57.65	51.42	2.55988e+06	1.66919e+06	2.85554e+06	1.86484e+06	1.61105e+06
FALSE	High	Master Protein	TGGT1_293180-t26_1-p1	transcript=TGGT1_293180-t26_1 | gene=TGGT1_293180 | organism=Toxoplasma_gondii_GT1 | gene_product=NADP-specific glutamate dehydrogenase | transcript_product=NADP-specific glutamate dehydrogenase | location=TGGT1_chrIa:124576-129868(-) | protein_length=578 | sequence_SO=chromosome | SO=protein_coding	0	131.448	39	17	211	17	1	578	63.8	8.18	251.57	17	0.74	0.867	0.0937745	0.0412363	0.269679	0.166604	8.35	0.01	0.902	0.74	0.664	0.867	0.868	0.775	-0.15	-0.43	-0.59	-0.21	-0.2	-0.37	1.40341e+06	1.26522e+06	1.28081e+07	1.1112e+07	60.27	49.64	63.89	56.7	1.40341e+06	853374	2.83476e+06	1.26522e+06	631475
FALSE	High	Master Protein	TGGT1_410370-t26_1-p1	transcript=TGGT1_410370-t26_1 | gene=TGGT1_410370 | organism=Toxoplasma_gondii_GT1 | gene_product=putative transmembrane protein | transcript_product=putative transmembrane protein | location=AAQM03000265:733-2584(+) | protein_length=435 | sequence_SO=contig | SO=protein_coding	0	131.37	50	17	179	5	1	435	47.7	9.19	275.03	17	0.188	1.1					4.96	7.47	0.851	0.188	0.01	0.626	1.155	1.1	-0.23	-2.41	-6.64	-0.68	0.21	0.14	129605	54498.9	1.85982e+06	2.04507e+06	35.46	94.3	15.55	42.01	143248	129605	67704.6	121892	24367
FALSE	High	Master Protein	TGGT1_318430-t26_1-p1	transcript=TGGT1_318430-t26_1 | gene=TGGT1_318430 | organism=Toxoplasma_gondii_GT1 | gene_product=malate dehydrogenase MDH | transcript_product=malate dehydrogenase MDH | location=TGGT1_chrIV:1282502-1286316(-) | protein_length=511 | sequence_SO=chromosome | SO=protein_coding	0	131.276	37	13	139	13	1	511	54.7	8.68	221.52	13	0.809	0.598	0.208958	0.00210861	0.336976	0.141622	15.97	0.66	0.942	0.558	0.809	0.598	0.59	0.636	-0.09	-0.84	-0.31	-0.74	-0.76	-0.65	452474	426441	1.06055e+07	6.2625e+06	20.19	33.96	79.45	83.45	452474	437269	620454	426441	243942
FALSE	High	Master Protein	TGGT1_238050-t26_1-p1	transcript=TGGT1_238050-t26_1 | gene=TGGT1_238050 | organism=Toxoplasma_gondii_GT1 | gene_product=nuclease and tudor domain-containing protein | transcript_product=nuclease and tudor domain-containing protein | location=TGGT1_chrVI:31087-39926(+) | protein_length=1024 | sequence_SO=chromosome | SO=protein_coding	0	130.745	26	22	101	22	1	1024	114.2	8.31	139.26	22	5.674	0.891	0.0148959	0.568514	0.119681	0.655796	8.45	17.47	5.351	5.674	11.308	1.154	0.891	0.759	2.42	2.5	3.5	0.21	-0.17	-0.4	401220	2.14688e+06	5039881	4.49235e+06	12.37	57.35	98.75	83.18	401220	359979	460207	2.14688e+06	2.0426e+06
FALSE	High	Master Protein	TGGT1_300260-t26_1-p1	transcript=TGGT1_300260-t26_1 | gene=TGGT1_300260 | organism=Toxoplasma_gondii_GT1 | gene_product=threonyl-tRNA synthetase family protein | transcript_product=threonyl-tRNA synthetase family protein | location=TGGT1_chrXII:83727-88302(+) | protein_length=844 | sequence_SO=chromosome | SO=protein_coding	0	130.677	24	18	124	18	1	844	95.8	7.49	191.91	18	0.827	0.679	0.417166	0.0207965	0.520512	0.149741	31.44	4.13	0.827	0.571	1.147	0.766	0.679	0.638	-0.27	-0.81	0.2	-0.38	-0.56	-0.65	401791	330378	8.70096e+06	5.90674e+06	34.11	35.71	70.44	62.77	573268	401791	288010	474069	229242
FALSE	High	Master Protein	TGGT1_216880-t26_1-p1	transcript=TGGT1_216880-t26_1 | gene=TGGT1_216880 | organism=Toxoplasma_gondii_GT1 | gene_product=guanine nucleotide-binding protein | transcript_product=guanine nucleotide-binding protein | location=TGGT1_chrXI:5736268-5739860(-) | protein_length=321 | sequence_SO=chromosome | SO=protein_coding	0	130.62	71	15	183	15	1	321	35.1	6.34	319.98	15	0.631	0.837	0.116266	0.0648885	0.275441	0.183862	13.91	3.39	0.861	0.631	0.483	0.714	0.837	0.864	-0.22	-0.66	-1.05	-0.49	-0.26	-0.21	931402	630916	1.29236e+07	1.08135e+07	30.34	4.52	63.51	70.46	733151	931402	1.32749e+06	630916	587964
FALSE	High	Master Protein	TGGT1_321500-t26_1-p1	transcript=TGGT1_321500-t26_1 | gene=TGGT1_321500 | organism=Toxoplasma_gondii_GT1 | gene_product=RNA recognition motif-containing protein | transcript_product=RNA recognition motif-containing protein | location=TGGT1_chrIb:1771014-1773404(+) | protein_length=475 | sequence_SO=chromosome | SO=protein_coding	0	129.826	40	14	183	14	1	475	50.9	8.35	220.88	14	0.43	0.911	0.0713138	0.232335	0.234756	0.362685	10.69	4.19	0.622	0.43	0.262	0.911	0.942	0.667	-0.69	-1.22	-1.93	-0.13	-0.09	-0.58	1.2829e+06	459667	1.36208e+07	1.2829e+07	27.65	35.74	79.86	60.06	1.2829e+06	1.01713e+06	1.75503e+06	797402	437093
FALSE	High	Master Protein	TGGT1_270250-t26_1-p1	transcript=TGGT1_270250-t26_1 | gene=TGGT1_270250 | organism=Toxoplasma_gondii_GT1 | gene_product=dense granule protein GRA1 | transcript_product=dense granule protein GRA1 | location=TGGT1_chrVIII:5308049-5308756(-) | protein_length=190 | sequence_SO=chromosome | SO=protein_coding	0	129.576	52	11	477	11	1	190	20.1	4.28	826.43	11	0.94	0.901	0.475542	0.461769	0.564015	0.57265	6.07	22.98	0.897	0.94	1.05	0.901	0.729	1.102	-0.16	-0.09	0.07	-0.15	-0.46	0.14	1.95483e+07	1.84925e+07	1.70631e+08	1.73316e+08	2.71	5.71	40.12	34.51	1.95483e+07	1.96712e+07	1.87088e+07	1.75256e+07	1.84925e+07
FALSE	High	Master Protein	TGGT1_249270-t26_1-p1	transcript=TGGT1_249270-t26_1 | gene=TGGT1_249270 | organism=Toxoplasma_gondii_GT1 | gene_product=putative protein disulfide isomerase-related protein (provisional) | transcript_product=putative protein disulfide isomerase-related protein (provisional) | location=TGGT1_chrXII:4348987-4354246(+) | protein_length=547 | sequence_SO=chromosome | SO=protein_coding	0	129.145	32	15	121	15	1	547	59.8	7.84	115.79	15	0.699	0.628	0.165735	0.0719668	0.303781	0.193174	3.13	12.07	0.982	0.669	0.699	0.788	0.628	0.498	-0.03	-0.58	-0.52	-0.34	-0.67	-1.01	785045	525069	1.35888e+07	8.53227e+06	40.3	62.27	59.52	37.19	1.22529e+06	785045	548020	1.20307e+06	525069
FALSE	High	Master Protein	TGGT1_219800-t26_1-p1	transcript=TGGT1_219800-t26_1 | gene=TGGT1_219800 | organism=Toxoplasma_gondii_GT1 | gene_product=putative vacuolar ATP synthase subunit b | transcript_product=putative vacuolar ATP synthase subunit b | location=TGGT1_chrXII:574692-577426(+) | protein_length=505 | sequence_SO=chromosome | SO=protein_coding	0	127.198	50	17	84	17	1	505	56.6	5.4	128.21	17	0.729	0.733	0.320247	0.0634668	0.445941	0.183795	25.14	5.19	0.962	0.729	0.162	0.874	0.733	0.685	-0.06	-0.46	-2.62	-0.19	-0.45	-0.55	525640	281414	3.72257e+06	3.25459e+06	57.57	51.36	94.74	85.66	525640	386019	1.12035e+06	505441	281414
FALSE	High	Master Protein	TGGT1_287500-t26_1-p1	transcript=TGGT1_287500-t26_1 | gene=TGGT1_287500 | organism=Toxoplasma_gondii_GT1 | gene_product=putative T complex chaperonin | transcript_product=putative T complex chaperonin | location=TGGT1_chrV:438209-443517(-) | protein_length=556 | sequence_SO=chromosome | SO=protein_coding	0	126.695	58	23	114	23	1	556	59.3	7.5	106.76	23	0.439	0.67	0.153013	0.0977311	0.297283	0.214378	1.59	12.16	0.067	0.439	0.463	0.547	0.859	0.67	-3.9	-1.19	-1.11	-0.87	-0.22	-0.58	1.51964e+06	187017	6.70136e+06	5.55966e+06	60.09	110.2	60.46	59.21	1.51964e+06	426460	1.92601e+06	101651	187017
FALSE	High	Master Protein	TGGT1_221470-t26_1-p1	transcript=TGGT1_221470-t26_1 | gene=TGGT1_221470 | organism=Toxoplasma_gondii_GT1 | gene_product=hypothetical protein | transcript_product=hypothetical protein | location=TGGT1_chrII:360683-367434(+) | protein_length=552 | sequence_SO=chromosome | SO=protein_coding	0	126.628	42	21	183	21	1	552	61.6	6.18	333.16	21	7.606	0.782	0.00204087	0.0571478	0.0693896	0.178894	1.13	3.66	7.664	7.606	5.864	0.639	0.782	0.814	2.94	2.93	2.55	-0.65	-0.35	-0.3	6.75418e+06	5.17635e+07	7.14699e+06	5.58973e+06	67.1	50.71	55.48	64.38	6.75418e+06	5.02946e+06	1.69056e+07	5.17635e+07	3.82544e+07
FALSE	High	Master Protein	TGGT1_226250-t26_1-p1	transcript=TGGT1_226250-t26_1 | gene=TGGT1_226250 | organism=Toxoplasma_gondii_GT1 | gene_product=DEAD (Asp-Glu-Ala-Asp) box polypeptide DDX3X | transcript_product=DEAD (Asp-Glu-Ala-Asp) box polypeptide DDX3X | location=TGGT1_chrX:1667417-1670378(+) | protein_length=734 | sequence_SO=chromosome | SO=protein_coding	0	126.45	42	19	100	19	1	734	78.5	9.09	114.03	19	0.615	0.682	0.0613587	0.0604767	0.232613	0.183795	10.31	4.9	0.502	0.772	0.615	0.634	0.845	0.682	-0.99	-0.37	-0.7	-0.66	-0.24	-0.55	97407.9	75172.8	6.8245e+06	4.7487e+06	110.28	93.66	79.22	75.04	591017	97407.9	91520.7	296654	75172.8
FALSE	High	Master Protein	TGGT1_300100-t26_1-p1	transcript=TGGT1_300100-t26_1 | gene=TGGT1_300100 | organism=Toxoplasma_gondii_GT1 | gene_product=rhoptry neck protein RON2 | transcript_product=rhoptry neck protein RON2 | location=TGGT1_chrXII:175560-186129(-) | protein_length=1479 | sequence_SO=chromosome | SO=protein_coding	0	125.906	19	21	141	21	1	1479	166.3	9.58	115.89	21	3.703	0.924	0.113015	0.577457	0.274465	0.661805	54.54	6.97	1.357	3.703	5.066	0.924	1.088	0.873	0.44	1.89	2.34	-0.11	0.12	-0.2	251027	890723	8.62873e+06	9.38904e+06	61.01	22.09	51.1	42.92	646530	240518	251027	877457	890723
FALSE	High	Master Protein	TGGT1_229010-t26_1-p1	transcript=TGGT1_229010-t26_1 | gene=TGGT1_229010 | organism=Toxoplasma_gondii_GT1 | gene_product=rhoptry neck protein RON4 | transcript_product=rhoptry neck protein RON4 | location=TGGT1_chrVIII:18238-24970(+) | protein_length=984 | sequence_SO=chromosome | SO=protein_coding	0	125.701	39	24	109	24	1	984	107.3	6.46	112.72	24	0.899	0.706	0.726076	0.156594	0.781633	0.282253	32.84	1.16	0.899	2.977	0.653	0.706	0.976	0.695	-0.15	1.57	-0.62	-0.5	-0.04	-0.53	266988	463306	6.30523e+06	5.92086e+06	81.52	57.93	70.14	59.02	759075	155640	266988	682504	463306
FALSE	High	Master Protein	TGGT1_279390-t26_1-p1	transcript=TGGT1_279390-t26_1 | gene=TGGT1_279390 | organism=Toxoplasma_gondii_GT1 | gene_product=putative proliferation-associated protein 2G4 | transcript_product=putative proliferation-associated protein 2G4 | location=TGGT1_chrIX:43752-48368(-) | protein_length=462 | sequence_SO=chromosome | SO=protein_coding	0	124.722	41	18	175	18	1	462	50.3	6.62	223.32	18	0.252	0.723	0.0651952	0.0465501	0.232613	0.166604	4.54	5.8	0.252	0.475	0.131	0.777	0.723	0.591	-1.99	-1.08	-2.94	-0.36	-0.47	-0.76	3.42688e+06	768108	1.32561e+07	9.58747e+06	42.64	22.66	77.21	62.81	3.42688e+06	1.61826e+06	4.16063e+06	863964	768108
FALSE	High	Master Protein	TGGT1_269885A-t26_1-p1	transcript=TGGT1_269885A-t26_1 | gene=TGGT1_269885A | organism=Toxoplasma_gondii_GT1 | gene_product=rhoptry metalloprotease toxolysin TLN1 | transcript_product=rhoptry metalloprotease toxolysin TLN1 | location=TGGT1_chrVIII:5561686-5568242(+) | protein_length=1291 | sequence_SO=chromosome | SO=protein_coding	0	124.58	26	23	79	18	1	1291	142.2	6.92	80.78	23	0.834	0.535	0.130489	0.0639677	0.280298	0.183795	9.44	12.37	0.91	0.834	0.671	0.691	0.535	0.378	-0.14	-0.26	-0.57	-0.53	-0.9	-1.4	469514	391347	2.50758e+06	1.34082e+06	65.45	50	105.58	80.17	269097	469514	1.00491e+06	244857	391347
FALSE	High	Master Protein	TGGT1_243730-t26_1-p1	transcript=TGGT1_243730-t26_1 | gene=TGGT1_243730 | organism=Toxoplasma_gondii_GT1 | gene_product=rhoptry protein ROP9 | transcript_product=rhoptry protein ROP9 | location=TGGT1_chrVI:2733555-2736099(+) | protein_length=353 | sequence_SO=chromosome | SO=protein_coding	0	123.609	52	16	233	16	1	353	37.7	8.31	275.55	16	1.108	0.951	0.100633	0.250439	0.269679	0.378441	4.22	5.18	1.25	1.077	1.108	0.951	0.988	0.838	0.32	0.11	0.15	-0.07	-0.02	-0.25	1.30434e+06	1.44538e+06	2.11063e+07	2.08515e+07	23.25	31.93	56.84	47.88	1.87104e+06	1.25238e+06	1.30434e+06	2.3393e+06	1.34827e+06
FALSE	High	Master Protein	TGGT1_289650-t26_1-p1	transcript=TGGT1_289650-t26_1 | gene=TGGT1_289650 | organism=Toxoplasma_gondii_GT1 | gene_product=PEP-carboxykinase I | transcript_product=PEP-carboxykinase I | location=TGGT1_chrIX:3173228-3176423(+) | protein_length=677 | sequence_SO=chromosome | SO=protein_coding	0	123.463	31	18	147	18	1	677	75.3	8.15	193.77	18	1.291	0.817	0.30757	0.0218846	0.430594	0.149741	41.62	0.39	0.928	1.291	1.688	0.736	0.817	0.82	-0.11	0.37	0.76	-0.44	-0.29	-0.29	878937	815868	9.50412e+06	7.46231e+06	30	49.41	60.77	64.34	878937	515979	956367	815868	665888
FALSE	High	Master Protein	TGGT1_258580-t26_1-p1	transcript=TGGT1_258580-t26_1 | gene=TGGT1_258580 | organism=Toxoplasma_gondii_GT1 | gene_product=rhoptry protein ROP17 | transcript_product=rhoptry protein ROP17 | location=TGGT1_chrVIIb:3287362-3289188(-) | protein_length=608 | sequence_SO=chromosome | SO=protein_coding	0	123.408	34	15	128	15	1	608	69	9.57	137.28	15	0.546	0.766	0.118691	0.0289122	0.275847	0.161762	9.94	4.21	0.669	0.546	0.247	0.729	0.766	0.845	-0.58	-0.87	-2.02	-0.46	-0.38	-0.24	828772	418686	1.03771e+07	7.94848e+06	16.56	38.67	47.59	55.49	625916	862160	828772	418686	470913
FALSE	High	Master Protein	TGGT1_201680-t26_1-p1	transcript=TGGT1_201680-t26_1 | gene=TGGT1_201680 | organism=Toxoplasma_gondii_GT1 | gene_product=putative eukaryotic initiation factor-3 subunit 10 | transcript_product=putative eukaryotic initiation factor-3 subunit 10 | location=TGGT1_chrVIIa:3754116-3762345(+) | protein_length=1031 | sequence_SO=chromosome | SO=protein_coding	0	122.566	28	25	90	25	1	1031	118.8	8.73	87.42	25	0.231	0.638	0.172321	0.0184611	0.309891	0.149741	4.25	5.23	0.872	0.231	0.107	0.693	0.556	0.638	-0.2	-2.12	-3.23	-0.53	-0.85	-0.65	630115	216886	6.8537e+06	4.03018e+06	25.92	89.67	65.93	67.67	630115	940034	601770	549717	216886
FALSE	High	Master Protein	TGGT1_263300-t26_1-p1	transcript=TGGT1_263300-t26_1 | gene=TGGT1_263300 | organism=Toxoplasma_gondii_GT1 | gene_product=eukaryotic porin protein | transcript_product=eukaryotic porin protein | location=TGGT1_chrVIIb:618828-622551(-) | protein_length=290 | sequence_SO=chromosome | SO=protein_coding	0	122.293	63	15	176	15	1	290	31.3	8.94	326.99	15	0.543	0.64	0.0435181	0.020886	0.208887	0.149741	5.91	5.65	0.713	0.543	0.469	0.64	0.554	0.7	-0.49	-0.88	-1.09	-0.64	-0.85	-0.51	1.18306e+06	554922	1.54697e+07	9.90556e+06	29.73	51.52	62.99	72.96	1.74746e+06	1.00027e+06	1.18306e+06	1.24588e+06	542729
FALSE	High	Master Protein	TGGT1_247510-t26_1-p1	transcript=TGGT1_247510-t26_1 | gene=TGGT1_247510 | organism=Toxoplasma_gondii_GT1 | gene_product=fructose-bisphospatase II | transcript_product=fructose-bisphospatase II | location=TGGT1_chrXII:3317257-3321142(+) | protein_length=381 | sequence_SO=chromosome | SO=protein_coding	0	121.713	35	12	188	12	1	381	42.4	6.61	199.87	12	0.901	0.724	0.619268	0.0465089	0.684719	0.166604	2.38	3.91	0.901	0.883	2.032	0.85	0.687	0.724	-0.15	-0.18	1.02	-0.23	-0.54	-0.47	795170	716162	1.64919e+07	1.13347e+07	30.83	13.15	64.55	61.2	795170	810351	439095	716162	715389
FALSE	High	Master Protein	TGGT1_259550-t26_1-p1	transcript=TGGT1_259550-t26_1 | gene=TGGT1_259550 | organism=Toxoplasma_gondii_GT1 | gene_product=dihydropteroate synthase | transcript_product=dihydropteroate synthase | location=TGGT1_chrVIIb:2750606-2755609(-) | protein_length=748 | sequence_SO=chromosome | SO=protein_coding	0	121.553	34	18	114	18	1	748	82.7	6.58	134.76	18	0.778	0.77	0.116912	0.227589	0.275441	0.360474	14.06	11.89	0.778	0.9	0.634	0.666	1.021	0.77	-0.36	-0.15	-0.66	-0.59	0.03	-0.38	605558	497028	4.68594e+06	4.7841e+06	103.07	88.05	78.42	73.43	605558	552080	3.12987e+06	471391	497028
FALSE	High	Master Protein	TGGT1_230210-t26_1-p1	transcript=TGGT1_230210-t26_1 | gene=TGGT1_230210 | organism=Toxoplasma_gondii_GT1 | gene_product=alveolin domain containing intermediate filament IMC10 | transcript_product=alveolin domain containing intermediate filament IMC10 | location=TGGT1_chrVIII:682439-685345(+) | protein_length=560 | sequence_SO=chromosome | SO=protein_coding	0	120.67	40	15	109	15	1	560	61.1	4.79	195.79	15	1.527	0.752	0.0612609	0.0300581	0.232613	0.161762	8.79	0.36	1.193	1.618	1.527	0.749	0.854	0.752	0.25	0.69	0.61	-0.42	-0.23	-0.41	673288	922600	9.67079e+06	8.26108e+06	16.23	21.22	57.22	53.5	673288	570192	790099	803053	922600
FALSE	High	Master Protein	TGGT1_324600-t26_1-p1	transcript=TGGT1_324600-t26_1 | gene=TGGT1_324600 | organism=Toxoplasma_gondii_GT1 | gene_product=heat shock protein | transcript_product=heat shock protein | location=TGGT1_chrVIII:2284363-2285174(-) | protein_length=185 | sequence_SO=chromosome | SO=protein_coding	0	119.694	69	12	242	12	1	185	20.3	5.44	365.83	12	0.77	0.716	0.435357	0.0244046	0.536633	0.1583	17.93	6.21	0.613	1.198	0.77	0.64	0.716	0.774	-0.71	0.26	-0.38	-0.64	-0.48	-0.37	2.23755e+06	1.6567e+06	2.6247e+07	1.87813e+07	26.37	9.55	54.13	62.62	2.33488e+06	1.38327e+06	2.23755e+06	1.43067e+06	1.6567e+06
FALSE	High	Master Protein	TGGT1_261570-t26_1-p1	transcript=TGGT1_261570-t26_1 | gene=TGGT1_261570 | organism=Toxoplasma_gondii_GT1 | gene_product=ribosomal protein RPL7A | transcript_product=ribosomal protein RPL7A | location=TGGT1_chrVIIb:1628077-1630958(+) | protein_length=276 | sequence_SO=chromosome | SO=protein_coding	0	118.768	52	17	221	17	1	276	31	10.45	187.31	17	0.485	0.748	0.0349127	0.0094656	0.200625	0.149741	1.81	3.53	0.677	0.485	0.46	0.78	0.748	0.705	-0.56	-1.04	-1.12	-0.36	-0.42	-0.5	1.3137e+06	604605	1.59859e+07	1.24618e+07	51.76	73.73	73.51	68.59	2.45559e+06	900218	1.3137e+06	1.66273e+06	436914
FALSE	High	Master Protein	TGGT1_218410-t26_1-p1	transcript=TGGT1_218410-t26_1 | gene=TGGT1_218410 | organism=Toxoplasma_gondii_GT1 | gene_product=ribosomal protein RPP0 | transcript_product=ribosomal protein RPP0 | location=TGGT1_chrXII:1471598-1473146(+) | protein_length=314 | sequence_SO=chromosome | SO=protein_coding	0	118.265	47	11	190	11	1	314	34.1	5.6	277.66	11	1.192	0.707	0.0109612	0.00580671	0.116211	0.149741	2.31	1.73	1.174	1.192	1.253	0.707	0.753	0.691	0.23	0.25	0.33	-0.5	-0.41	-0.53	783308	933839	2.0156e+07	1.51701e+07	42.48	39.74	76.76	73.4	1.41177e+06	783308	657809	1.65683e+06	933839
FALSE	High	Master Protein	TGGT1_275650-t26_1-p1	transcript=TGGT1_275650-t26_1 | gene=TGGT1_275650 | organism=Toxoplasma_gondii_GT1 | gene_product=hypothetical protein | transcript_product=hypothetical protein | location=TGGT1_chrIII:288290-290923(+) | protein_length=877 | sequence_SO=chromosome | SO=protein_coding	0	118.122	32	19	56	19	1	877	101.1	9.19	88.36	19	45.723	0.927	0.03255	0.65966	0.200625	0.730051	41.15	36.75	33.033	100	45.723	0.927	1.238	0.659	5.05	6.64	5.51	-0.11	0.31	-0.6	159109	6.83779e+06	2.54861e+06	3.15529e+06	79.51	7.07	123.28	99.86	206996	13710.7	159109	6.83779e+06	6313492
FALSE	High	Master Protein	TGGT1_229990-t26_1-p1	transcript=TGGT1_229990-t26_1 | gene=TGGT1_229990 | organism=Toxoplasma_gondii_GT1 | gene_product=putative T-complex protein 1 subunit alpha | transcript_product=putative T-complex protein 1 subunit alpha | location=TGGT1_chrVIII:493249-499968(-) | protein_length=548 | sequence_SO=chromosome | SO=protein_coding	0	117.211	44	17	94	17	1	548	59.2	6.25	129.38	17	17.985	0.778	0.060156	0.0623204	0.232613	0.183795	115.82	9.03	3.936	17.985	40.21	0.856	0.778	0.672	1.98	4.17	5.33	-0.22	-0.36	-0.57	76378.7	1.37369e+06	5.38762e+06	4.61228e+06	73.26	58.66	80.58	68.75	235483	76378.7	70923.9	926755	1.37369e+06
FALSE	High	Master Protein	TGGT1_232710-t26_1-p1	transcript=TGGT1_232710-t26_1 | gene=TGGT1_232710 | organism=Toxoplasma_gondii_GT1 | gene_product=ribosomal protein RPS3A | transcript_product=ribosomal protein RPS3A | location=TGGT1_chrVIII:2231374-2232762(+) | protein_length=259 | sequence_SO=chromosome | SO=protein_coding	0	116.808	49	16	169	16	1	259	29.4	9.57	241.88	16	1.046	0.873	0.890936	0.234679	0.920258	0.362685	30.85	9.37	0.804	1.046	1.263	0.873	0.945	0.604	-0.31	0.06	0.34	-0.2	-0.08	-0.73	1.61299e+06	1.29749e+06	1.7832e+07	1.68577e+07	50.35	69.21	59.62	35.26	1.61299e+06	941388	2.68478e+06	1.29749e+06	984494
FALSE	High	Master Protein	TGGT1_256990-t26_1-p1	transcript=TGGT1_256990-t26_1 | gene=TGGT1_256990 | organism=Toxoplasma_gondii_GT1 | gene_product=glycyl-tRNA synthetase | transcript_product=glycyl-tRNA synthetase | location=TGGT1_chrVIIb:4226828-4230134(+) | protein_length=771 | sequence_SO=chromosome | SO=protein_coding	0	116.609	32	19	94	19	1	771	86.3	7.33	127.92	19	0.691	0.569	0.00461833	0.244674	0.0794754	0.372489	2.95	12.83	0.691	0.723	0.663	0.417	1.076	0.569	-0.53	-0.47	-0.59	-1.26	0.11	-0.81	5.02874e+06	3.63486e+06	5.52349e+06	5.94552e+06	60.79	56.65	64.95	57.66	4.91318e+06	5.02874e+06	1.30343e+07	3.39684e+06	3.63486e+06
FALSE	High	Master Protein	TGGT1_279100-t26_1-p1	transcript=TGGT1_279100-t26_1 | gene=TGGT1_279100 | organism=Toxoplasma_gondii_GT1 | gene_product=hypothetical protein | transcript_product=hypothetical protein | location=AAQM03000427:32-1883(+) | protein_length=435 | sequence_SO=contig | SO=protein_coding	0	115.988	44	14	154	3	1	435	48	7.5	257.56	14	1.066	1.112					58.88	32	1.571	0.724		1.112	0.872	2.061	0.65	-0.47		0.15	-0.2	1.04	60531.1	64542.5	687997	671010	8.31	44.86	14.44	60.57	57074.5	64197.2		89647.2	46468.1
FALSE	High	Master Protein	TGGT1_243800-t26_1-p1	transcript=TGGT1_243800-t26_1 | gene=TGGT1_243800 | organism=Toxoplasma_gondii_GT1 | gene_product=putative long-chain fatty acid CoA ligase | transcript_product=putative long-chain fatty acid CoA ligase | location=TGGT1_chrVI:2778396-2788707(-) | protein_length=758 | sequence_SO=chromosome | SO=protein_coding	0	115.782	42	22	73	22	1	758	83.5	5.52	86.94	22	1.037	0.698	0.393494	0.0166985	0.501705	0.149741	0.38	3.64	1.037	1.034	3.942	0.772	0.698	0.663	0.05	0.05	1.98	-0.37	-0.52	-0.59	66811.3	149827	4.84469e+06	3.38261e+06	74.07	41.41	70.98	64.67	165119	66811.3	38008.1	171236	69110.5
FALSE	High	Master Protein	TGGT1_217460-t26_1-p1	transcript=TGGT1_217460-t26_1 | gene=TGGT1_217460 | organism=Toxoplasma_gondii_GT1 | gene_product=glutaminyl-tRNA synthetase (GlnRS) | transcript_product=glutaminyl-tRNA synthetase (GlnRS) | location=TGGT1_chrXII:1787579-1795013(-) | protein_length=860 | sequence_SO=chromosome | SO=protein_coding	0	115.771	24	16	103	16	1	860	95.4	7.39	134.37	16	0.113	0.834	0.066585	0.282577	0.232613	0.413231	0.32	21.12	0.133	0.113	0.012	0.555	1.005	0.834	-2.92	-3.14	-6.41	-0.85	0.01	-0.26	3.91573e+06	399171	6.12612e+06	6.08865e+06	52.47	61.32	39.47	48.72	3.01187e+06	3.91573e+06	7.88138e+06	399171	443469
FALSE	High	Master Protein	TGGT1_272910-t26_1-p1	transcript=TGGT1_272910-t26_1 | gene=TGGT1_272910 | organism=Toxoplasma_gondii_GT1 | gene_product=T-complex protein 1 delta subunit | transcript_product=T-complex protein 1 delta subunit | location=TGGT1_chrVIII:3700329-3707666(+) | protein_length=542 | sequence_SO=chromosome | SO=protein_coding	0	115.465	45	19	98	19	1	542	58.6	7.23	137.53	19	0.455	0.693	0.151689	0.0374993	0.296119	0.166301	3.64	3.8	0.455	0.509	0.085	0.817	0.693	0.656	-1.14	-0.97	-3.55	-0.29	-0.53	-0.61	520825	204184	6.13563e+06	4.25053e+06	15.11	64.23	84.62	76.88	534687	401233	520825	243259	204184
FALSE	High	Master Protein	TGGT1_204400-t26_1-p1	transcript=TGGT1_204400-t26_1 | gene=TGGT1_204400 | organism=Toxoplasma_gondii_GT1 | gene_product=putative ATPase synthase subunit alpha | transcript_product=putative ATPase synthase subunit alpha | location=TGGT1_chrVIIa:1716199-1723634(+) | protein_length=577 | sequence_SO=chromosome | SO=protein_coding	0	115.278	33	18	188	18	1	577	62.1	8.37	225.51	18	0.869	0.741	0.234772	0.0190134	0.365599	0.149741	3.46	5.7	0.869	1.017	0.842	0.741	0.797	0.689	-0.2	0.02	-0.25	-0.43	-0.33	-0.54	1.14774e+06	1.03487e+06	1.51169e+07	1.20427e+07	28.14	23.92	63.43	56.5	1.70018e+06	1.01721e+06	1.14774e+06	1.47785e+06	1.03487e+06
FALSE	High	Master Protein	TGGT1_236210-t26_1-p1	transcript=TGGT1_236210-t26_1 | gene=TGGT1_236210 | organism=Toxoplasma_gondii_GT1 | gene_product=putative peptidase M16 family potein | transcript_product=putative peptidase M16 family potein | location=TGGT1_chrX:5216353-5222014(+) | protein_length=509 | sequence_SO=chromosome | SO=protein_coding	0	114.035	47	19	111	19	1	509	56.9	6.6	129.7	19	0.927	0.945	0.363543	0.325972	0.481381	0.447799	10.71	0.28	0.927	1.005	0.527	0.945	0.947	0.534	-0.11	0.01	-0.92	-0.08	-0.08	-0.9	621794	483672	6560259	6.21373e+06	20.79	19.57	78.8	43.21	621794	481220	735604	576523	483672
FALSE	High	Master Protein	TGGT1_248340-t26_1-p1	transcript=TGGT1_248340-t26_1 | gene=TGGT1_248340 | organism=Toxoplasma_gondii_GT1 | gene_product=GTP-binding nuclear protein ran/tc4 | transcript_product=GTP-binding nuclear protein ran/tc4 | location=TGGT1_chrXII:3749189-3752256(+) | protein_length=229 | sequence_SO=chromosome | SO=protein_coding	0	113.568	66	13	195	13	1	229	26	8.65	343.55	13	1.077	0.929	0.633827	0.394881	0.695165	0.514734	4.1	15.81	1.077	0.602	1.107	0.929	1.044	0.634	0.11	-0.73	0.15	-0.11	0.06	-0.66	1.5786e+06	1.56275e+06	1.38959e+07	1.45086e+07	26.01	47.97	90.99	64.57	1.45071e+06	1.5786e+06	2.30848e+06	1.56275e+06	949813
FALSE	High	Master Protein	TGGT1_205440-t26_1-p1	transcript=TGGT1_205440-t26_1 | gene=TGGT1_205440 | organism=Toxoplasma_gondii_GT1 | gene_product=CCT chaperonin gamma subunit | transcript_product=CCT chaperonin gamma subunit | location=TGGT1_chrVIIa:1309659-1315491(+) | protein_length=556 | sequence_SO=chromosome | SO=protein_coding	0	112.478	40	21	100	21	1	556	60.7	5.94	93.87	21	0.065	0.672					0.53	2.08	0.251	0.065	0.01	0.64	0.693	0.672	-1.99	-3.94	-6.64	-0.64	-0.53	-0.57	1.33984e+06	166103	6.3238e+06	4.37954e+06	14.11	80.09	66.52	67.05	1.2563e+06	1.33984e+06	1.63498e+06	315659	87405.4
FALSE	High	Master Protein	TGGT1_240600-t26_1-p1	transcript=TGGT1_240600-t26_1 | gene=TGGT1_240600 | organism=Toxoplasma_gondii_GT1 | gene_product=putative chaperonin cpn60 | transcript_product=putative chaperonin cpn60 | location=TGGT1_chrVI:1306402-1309981(+) | protein_length=667 | sequence_SO=chromosome | SO=protein_coding	0	112.345	38	15	70	15	1	667	72.2	5.68	115.25	15	0.197	1.065					5.47	29.18	0.65	0.197	0.01	1.274	1.065	0.581	-0.62	-2.34	-6.64	0.35	0.09	-0.78	243005	54184.7	3.18863e+06	3.39539e+06	80.19	111.62	113.91	76.99	243005	94346.6	567174	157887	18595.5
FALSE	High	Master Protein	TGGT1_308020-t26_1-p1	transcript=TGGT1_308020-t26_1 | gene=TGGT1_308020 | organism=Toxoplasma_gondii_GT1 | gene_product=SAG-related sequence SRS57 | transcript_product=SAG-related sequence SRS57 | location=TGGT1_chrXII:456740-457897(-) | protein_length=385 | sequence_SO=chromosome | SO=protein_coding	0	111.579	38	11	155	11	1	385	41.7	7.14	268.09	11	0.579	0.866	0.00523146	0.0855694	0.0837086	0.202256	1.17	6.17	0.579	0.639	0.565	0.818	0.866	0.945	-0.79	-0.65	-0.82	-0.29	-0.21	-0.08	2.52049e+06	1.5751e+06	1.55331e+07	1.28385e+07	69.12	64.49	51.73	59.14	2.52049e+06	2.46348e+06	7.45634e+06	1.45841e+06	1.5751e+06
FALSE	High	Master Protein	TGGT1_310670-t26_1-p1	transcript=TGGT1_310670-t26_1 | gene=TGGT1_310670 | organism=Toxoplasma_gondii_GT1 | gene_product=putative glycogen phosphorylase 1 | transcript_product=putative glycogen phosphorylase 1 | location=TGGT1_chrXI:1474522-1478513(+) | protein_length=912 | sequence_SO=chromosome | SO=protein_coding	0	110.984	32	21	67	21	1	912	105.4	6.58	71.84	21	2.329	1.118	0.0861835	0.740817	0.258509	0.797503	25.99	27.14	2.329	2.737	1.314	1.118	1.323	0.469	1.22	1.45	0.39	0.16	0.4	-1.09	514189	1.40743e+06	2.43273e+06	2.72052e+06	87.44	47.75	111.9	57.87	423858	514189	1.89916e+06	987156	1.40743e+06
FALSE	High	Master Protein	TGGT1_239100-t26_1-p1	transcript=TGGT1_239100-t26_1 | gene=TGGT1_239100 | organism=Toxoplasma_gondii_GT1 | gene_product=ribosomal protein RPS7 | transcript_product=ribosomal protein RPS7 | location=TGGT1_chrVI:457170-458270(+) | protein_length=196 | sequence_SO=chromosome | SO=protein_coding	0	109.274	61	12	215	12	1	196	22.6	9.86	282.6	12	0.745	0.806	0.163492	0.204613	0.303692	0.33527	14.42	10.46	0.745	0.875	0.481	0.806	0.894	0.486	-0.43	-0.19	-1.06	-0.31	-0.16	-1.04	2.29138e+06	1.38867e+06	1.91228e+07	1.54199e+07	39.53	47.24	78.08	42.87	3.51036e+06	1.58626e+06	2.29138e+06	2.61462e+06	1.38867e+06
FALSE	High	Master Protein	TGGT1_310080-t26_1-p1	transcript=TGGT1_310080-t26_1 | gene=TGGT1_310080 | organism=Toxoplasma_gondii_GT1 | gene_product=AMP-binding enzyme domain-containing protein | transcript_product=AMP-binding enzyme domain-containing protein | location=TGGT1_chrXI:1008086-1011664(-) | protein_length=789 | sequence_SO=chromosome | SO=protein_coding	0	109.087	32	20	72	19	1	789	87.8	5.6	104.33	20	1.181	1.001	0.564681	0.570394	0.645349	0.655796	15.77	21.36	1.181	1.307	0.847	1.145	1.001	0.56	0.24	0.39	-0.24	0.2	0	-0.84	449514	530918	3.21798e+06	3.22158e+06	46.31	29.79	99.47	61.47	449514	228515	632506	530918	298600
FALSE	High	Master Protein	TGGT1_295125-t26_1-p1	transcript=TGGT1_295125-t26_1 | gene=TGGT1_295125 | organism=Toxoplasma_gondii_GT1 | gene_product=rhoptry protein ROP4 | transcript_product=rhoptry protein ROP4 | location=TGGT1_chrIa:1394541-1396277(-) | protein_length=365 | sequence_SO=chromosome | SO=protein_coding	0	108.761	45	13	260	4	1	365	40.1	5.3	395.21	13	0.745	0.858	0.068465	0.161848	0.232781	0.285347	6.7	1.66	0.88	0.745	0.685	0.845	0.991	0.858	-0.18	-0.42	-0.55	-0.24	-0.01	-0.22	641583	564509	6.18428e+06	5.22655e+06	48.72	46.29	62.14	58.05	641583	284505	858344	564509	212025
FALSE	High	Master Protein	TGGT1_207620-t26_1-p1	transcript=TGGT1_207620-t26_1 | gene=TGGT1_207620 | organism=Toxoplasma_gondii_GT1 | gene_product=pyridine nucleotide-disulfide oxidoreductase domain-containing protein | transcript_product=pyridine nucleotide-disulfide oxidoreductase domain-containing protein | location=TGGT1_chrIb:171089-178693(-) | protein_length=664 | sequence_SO=chromosome | SO=protein_coding	0	107.563	31	16	104	16	1	664	71.2	8.98	163.7	16	0.371	0.566	0.110335	0.0355815	0.272034	0.163115	9.67	2.53	0.547	0.371	0.123	0.566	0.734	0.536	-0.87	-1.43	-3.02	-0.82	-0.45	-0.9	572890	135998	4.59255e+06	3.37138e+06	39.46	61.58	80.26	68.85	572890	366547	831499	313288	135998
FALSE	High	Master Protein	TGGT1_253430-t26_1-p1	transcript=TGGT1_253430-t26_1 | gene=TGGT1_253430 | organism=Toxoplasma_gondii_GT1 | gene_product=putative asparagine synthetase | transcript_product=putative asparagine synthetase | location=TGGT1_chrIII:924367-930594(+) | protein_length=588 | sequence_SO=chromosome | SO=protein_coding	0	107.247	39	18	116	18	1	588	65.8	6.73	140.51	18	0.584	0.809	0.11916	0.295108	0.275847	0.419526	17.67	27.7	0.788	0.584	0.362	0.809	1.04	0.568	-0.34	-0.77	-1.47	-0.31	0.06	-0.82	896609	329058	8.26789e+06	8.11158e+06	25.95	48.68	81.87	52.08	896609	550377	910136	706844	321654
FALSE	High	Master Protein	TGGT1_301440-t26_1-p1	transcript=TGGT1_301440-t26_1 | gene=TGGT1_301440 | organism=Toxoplasma_gondii_GT1 | gene_product=calcium-dependent protein kinase CDPK1 | transcript_product=calcium-dependent protein kinase CDPK1 | location=TGGT1_chrIV:2366836-2372193(+) | protein_length=582 | sequence_SO=chromosome | SO=protein_coding	0	107.191	37	16	112	14	1	582	65.4	6.44	110.91	16	3.997	0.887					26.02	9.52	3.296	3.997	100	0.96	0.887	0.79	1.72	2	6.64	-0.06	-0.17	-0.34	265551	1.01728e+06	4.14975e+06	3682464	21.13	39.04	83.23	74	308686	228443		1.01728e+06	913063
FALSE	High	Master Protein	TGGT1_257680-t26_1-p1	transcript=TGGT1_257680-t26_1 | gene=TGGT1_257680 | organism=Toxoplasma_gondii_GT1 | gene_product=myosin light chain MLC1 | transcript_product=myosin light chain MLC1 | location=TGGT1_chrVIIb:3843366-3845688(+) | protein_length=213 | sequence_SO=chromosome | SO=protein_coding	0	106.881	65	9	175	9	1	213	24.1	4.65	378.29	9	0.211	0.663	0.0680696	0.0416229	0.232781	0.166604	0.81	4.82	0.562	0.211	0.185	0.8	0.663	0.614	-0.83	-2.24	-2.43	-0.32	-0.59	-0.7	771217	162874	1.57139e+07	1.04135e+07	43.05	99.68	56.01	45.3	1.05566e+06	771217	413935	593322	162874
FALSE	High	Master Protein	TGGT1_239820-t26_1-p1	transcript=TGGT1_239820-t26_1 | gene=TGGT1_239820 | organism=Toxoplasma_gondii_GT1 | gene_product=D-3-phosphoglycerate dehydrogenase | transcript_product=D-3-phosphoglycerate dehydrogenase | location=TGGT1_chrVI:931789-940557(-) | protein_length=604 | sequence_SO=chromosome | SO=protein_coding	0	105.776	33	17	76	17	1	604	65.2	6.99	74.89	17	1.921	0.93	0.0272691	0.316186	0.185323	0.435823	5.19	8.25	1.854	1.921	2.773	0.989	0.93	0.663	0.89	0.94	1.47	-0.02	-0.11	-0.59	204817	393446	4.60445e+06	4.28062e+06	35.87	18.25	106.63	87.13	258110	204817	119943	478456	393446
FALSE	High	Master Protein	TGGT1_278870-t26_1-p1	transcript=TGGT1_278870-t26_1 | gene=TGGT1_278870 | organism=Toxoplasma_gondii_GT1 | gene_product=myosin F | transcript_product=myosin F | location=TGGT1_chrXII:5709485-5725053(+) | protein_length=1953 | sequence_SO=chromosome | SO=protein_coding	0	105.182	17	24	49	24	1	1953	216.3	8.1	50.97	24	0.181	0.56	0.0661726	0.481265	0.232613	0.5854	0.78	12.56	0.152	0.519	0.181	0.56	1.55	0.409	-2.72	-0.95	-2.46	-0.84	0.63	-1.29	177623	81631.9	2.23451e+06	2.39276e+06	89.57	51.78	91.08	44.62	704619	157167	177623	107277	81631.9
FALSE	High	Master Protein	TGGT1_227948-t26_1-p1	transcript=TGGT1_227948-t26_1 | gene=TGGT1_227948 | organism=Toxoplasma_gondii_GT1 | gene_product=peptidase M16 inactive domain-containing protein | transcript_product=peptidase M16 inactive domain-containing protein | location=TGGT1_chrX:626225-636243(+) | protein_length=1306 | sequence_SO=chromosome | SO=protein_coding	0	104.71	26	25	39	25	1	1306	142.6	6.81	52.78	25	0.01	0.488					0	15.21	0.248	0.01	0.01	0.488	0.698	0.158	-2.01	-6.64	-6.64	-1.04	-0.52	-2.66	205431	35442.3	747759	521921	61.61		138.2	78.07	143062	205431	454864	35442.3
FALSE	High	Master Protein	TGGT1_227360-t26_1-p1	transcript=TGGT1_227360-t26_1 | gene=TGGT1_227360 | organism=Toxoplasma_gondii_GT1 | gene_product=ribosomal protein RPL3 | transcript_product=ribosomal protein RPL3 | location=TGGT1_chrX:901297-903989(-) | protein_length=389 | sequence_SO=chromosome | SO=protein_coding	0	104.638	35	13	170	13	1	389	44	10.3	181.79	13	0.417	0.801	0.127996	0.12714	0.280298	0.250594	4.07	6.81	0.417	0.351	0.859	0.801	0.858	0.579	-1.26	-1.51	-0.22	-0.32	-0.22	-0.79	1.24357e+06	436368	1.29467e+07	1.11117e+07	59.39	37.65	79.46	57.28	1.56278e+06	1.24357e+06	355077	651420	436368
FALSE	High	Master Protein	TGGT1_269190-t26_1-p1	transcript=TGGT1_269190-t26_1 | gene=TGGT1_269190 | organism=Toxoplasma_gondii_GT1 | gene_product=glyceraldehyde-3-phosphate dehydrogenase GAPDH2 | transcript_product=glyceraldehyde-3-phosphate dehydrogenase GAPDH2 | location=TGGT1_chrVIII:6001367-6005276(-) | protein_length=995 | sequence_SO=chromosome | SO=protein_coding	0	103.919	20	13	83	12	1	995	105.1	5.05	134.68	13	3.371	0.873					134.22	11.95	3.371	0.319	100	0.873	0.966	0.511	1.75	-1.65	6.64	-0.2	-0.05	-0.97	71761.8	16135.3	4.20305e+06	3.98385e+06	47.63	151.69	93.15	57.79	101880	50547.2		343476	16135.3
FALSE	High	Master Protein	TGGT1_309730-t26_1-p1	transcript=TGGT1_309730-t26_1 | gene=TGGT1_309730 | organism=Toxoplasma_gondii_GT1 | gene_product=thioredoxin reductase | transcript_product=thioredoxin reductase | location=TGGT1_chrXI:735920-743442(-) | protein_length=662 | sequence_SO=chromosome | SO=protein_coding	0	103.177	37	14	83	14	1	662	70.6	6.67	101.91	14	0.417	0.731	0.00279605	0.0428313	0.0712992	0.166604	0.82	0.05	0.368	0.417	0.43	0.731	0.863	0.731	-1.44	-1.26	-1.22	-0.45	-0.21	-0.45	2.15038e+06	790392	4.3147e+06	3.58032e+06	76.64	82.42	85.66	80.71	2.15038e+06	1.54003e+06	6.18066e+06	790392	641972
FALSE	High	Master Protein	TGGT1_299210-t26_1-p1	transcript=TGGT1_299210-t26_1 | gene=TGGT1_299210 | organism=Toxoplasma_gondii_GT1 | gene_product=CTP synthase | transcript_product=CTP synthase | location=TGGT1_chrIII:2095036-2100826(+) | protein_length=652 | sequence_SO=chromosome | SO=protein_coding	0	103.112	33	16	84	16	1	652	70.9	7.25	111.29	16	0.874	0.798	0.0121002	0.0431413	0.116211	0.166604	0.33	7.65	0.874	0.877	0.833	0.798	0.868	0.734	-0.19	-0.19	-0.26	-0.33	-0.2	-0.45	5.63422e+06	4.94081e+06	3.05069e+06	2.59127e+06	8.8	10.68	105.1	98.56	6.44815e+06	5.63422e+06	5.49291e+06	5.63825e+06	4.94081e+06
FALSE	High	Master Protein	TGGT1_251690-t26_1-p1	transcript=TGGT1_251690-t26_1 | gene=TGGT1_251690 | organism=Toxoplasma_gondii_GT1 | gene_product=putative seryl-tRNA synthetase, cytoplasmic | transcript_product=putative seryl-tRNA synthetase, cytoplasmic | location=TGGT1_chrXII:5452731-5454179(+) | protein_length=482 | sequence_SO=chromosome | SO=protein_coding	0	102.845	32	15	93	15	1	482	54.1	7.02	146.58	15	1.535	0.746	0.472796	0.163219	0.562393	0.285347	26.68	10.93	0.741	1.535	1.811	0.746	0.647	0.967	-0.43	0.62	0.86	-0.42	-0.63	-0.05	516873	535593	7.26562e+06	4.6989e+06	36.47	35.48	31.44	50.82	722738	339183	516873	535593	520503
FALSE	High	Master Protein	TGGT1_257990-t26_1-p1	transcript=TGGT1_257990-t26_1 | gene=TGGT1_257990 | organism=Toxoplasma_gondii_GT1 | gene_product=putative heat shock protein 101 | transcript_product=putative heat shock protein 101 | location=TGGT1_chrVIIb:3637480-3646383(+) | protein_length=927 | sequence_SO=chromosome | SO=protein_coding	0	102.577	31	19	38	19	1	927	104.2	6.51	55.07	19	7.156	1.195					39.73	4.65	5.238	7.156	100	1.195	0.874	1.233	2.39	2.84	6.64	0.26	-0.2	0.3	73697.3	499433	1.90633e+06	2.27888e+06	35.64	55.41	40.15	52.76	95349	56962.3		499433	407601
FALSE	High	Master Protein	TGGT1_224350A-t26_1-p1	transcript=TGGT1_224350A-t26_1 | gene=TGGT1_224350A | organism=Toxoplasma_gondii_GT1 | gene_product=putative aminopeptidase N | transcript_product=putative aminopeptidase N | location=TGGT1_chrX:2967893-2975546(-) | protein_length=1219 | sequence_SO=chromosome | SO=protein_coding	0	102.302	17	20	53	20	1	1219	134.3	7.72	63.78	20	2.044	0.913	0.0636984	0.0172102	0.232613	0.149741	41.56	1.26	1.471	2.044	2.836	0.922	0.913	0.883	0.56	1.03	1.5	-0.12	-0.13	-0.18	334795	698906	1.81961e+06	1.67772e+06	18.99	20.4	106.84	104.92	334795	359893	246458	492493	735602
FALSE	High	Master Protein	TGGT1_309210-t26_1-p1	transcript=TGGT1_309210-t26_1 | gene=TGGT1_309210 | organism=Toxoplasma_gondii_GT1 | gene_product=putative peroxiredoxin 6 | transcript_product=putative peroxiredoxin 6 | location=TGGT1_chrXI:521482-524360(-) | protein_length=402 | sequence_SO=chromosome | SO=protein_coding	0	102.123	24	11	145	11	1	402	44.1	8.44	273.16	11	2.22	0.824	0.0393615	0.209671	0.206657	0.336795	3.82	10.2	2.22	2.162	4.009	0.824	0.908	0.518	1.15	1.11	2	-0.28	-0.14	-0.95	983120	2.18215e+06	1.54786e+07	1.40496e+07	10.47	47.17	88.09	57.44	983120	864701	1.06717e+06	2.18215e+06	1.86991e+06
FALSE	High	Master Protein	TGGT1_290660-t26_1-p1	transcript=TGGT1_290660-t26_1 | gene=TGGT1_290660 | organism=Toxoplasma_gondii_GT1 | gene_product=RNA recognition motif-containing protein | transcript_product=RNA recognition motif-containing protein | location=TGGT1_chrIX:3628759-3632147(-) | protein_length=446 | sequence_SO=chromosome | SO=protein_coding	0	101.948	38	9	86	9	1	446	48.3	7.81	105.76	9	1.248	0.737	0.513846	0.171523	0.597292	0.294039	73.24	16.99	1.248	0.631	6.504	0.953	0.737	0.581	0.32	-0.66	2.7	-0.07	-0.44	-0.78	114112	487482	5.56161e+06	4.09693e+06	78.53	76.72	91.52	70.35	390629	114112	109879	487482	72054.4
FALSE	High	Master Protein	TGGT1_214350-t26_1-p1	transcript=TGGT1_214350-t26_1 | gene=TGGT1_214350 | organism=Toxoplasma_gondii_GT1 | gene_product=putative GTP-binding protein | transcript_product=putative GTP-binding protein | location=TGGT1_chrX:6150425-6154448(+) | protein_length=396 | sequence_SO=chromosome | SO=protein_coding	0	101.845	48	13	70	13	1	396	44.5	7.02	85.04	13	1.701	0.891	0.13072	0.762648	0.280298	0.816694	10.12	28.1	1.818	1.701	1.085	0.891	1.347	0.678	0.86	0.77	0.12	-0.17	0.43	-0.56	625201	1.11067e+06	3.31283e+06	4.4615e+06	32.1	6.17	88.48	59.56	625201	593435	1.02401e+06	1.13638e+06	1.00973e+06
FALSE	High	Master Protein	TGGT1_313080-t26_1-p1	transcript=TGGT1_313080-t26_1 | gene=TGGT1_313080 | organism=Toxoplasma_gondii_GT1 | gene_product=hypothetical protein | transcript_product=hypothetical protein | location=TGGT1_chrXI:3049384-3050751(-) | protein_length=455 | sequence_SO=chromosome | SO=protein_coding	0	101.27	38	14	93	14	1	455	49.5	8.69	120.55	14	3.71	0.716					34.62	6	3.71	4.577	0.01	0.716	0.772	0.647	1.89	2.19	-6.64	-0.48	-0.37	-0.63	645763	2.187e+06	5.5966e+06	4.2378e+06	28.52	12.87	80.11	71.61	645763	436189	790059	2.39596e+06	1.99626e+06
FALSE	High	Master Protein	TGGT1_311230-t26_1-p1	transcript=TGGT1_311230-t26_1 | gene=TGGT1_311230 | organism=Toxoplasma_gondii_GT1 | gene_product=hypothetical protein | transcript_product=hypothetical protein | location=TGGT1_chrXI:1844321-1862670(+) | protein_length=4603 | sequence_SO=chromosome | SO=protein_coding	0	100.149	8	20	57	20	1	4603	494.5	4.88	45.05	20	8.259	1.017	0.0218508	0.497667	0.15842	0.593708	39.1	8.58	3.957	10.437	8.259	0.958	1.267	1.017	1.98	3.38	3.05	-0.06	0.34	0.02	130770	1.08006e+06	1.6212e+06	2.05385e+06	22.97	26.71	80.57	75.44	182175	120189	130770	720910	1.25443e+06
FALSE	High	Master Protein	TGGT1_310750-t26_1-p1	transcript=TGGT1_310750-t26_1 | gene=TGGT1_310750 | organism=Toxoplasma_gondii_GT1 | gene_product=emp24/gp25L/p24 family protein | transcript_product=emp24/gp25L/p24 family protein | location=TGGT1_chrXI:1533084-1537096(+) | protein_length=601 | sequence_SO=chromosome | SO=protein_coding	0	99.404	37	12	67	12	1	601	64.9	5.85	67.02	12	0.838	0.965	0.380595	0.536532	0.491401	0.629038	32.62	16.05	0.838	1.1	0.493	0.965	1.077	0.779	-0.26	0.14	-1.02	-0.05	0.11	-0.36	409738	349620	2.44527e+06	2.35937e+06	12.03	29.63	64.03	46.82	417415	333273	409738	349620	366683
FALSE	High	Master Protein	TGGT1_256970-t26_1-p1	transcript=TGGT1_256970-t26_1 | gene=TGGT1_256970 | organism=Toxoplasma_gondii_GT1 | gene_product=putative vacuolar ATP synthase subunit A | transcript_product=putative vacuolar ATP synthase subunit A | location=TGGT1_chrVIIb:4248002-4257516(-) | protein_length=616 | sequence_SO=chromosome | SO=protein_coding	0	99.258	40	17	79	17	1	616	68.1	5.48	80.65	17	0.423	0.781	0.22327	0.0187925	0.355837	0.149741	5.16	3.35	0.423	0.34	1.083	0.716	0.81	0.781	-1.24	-1.56	0.12	-0.48	-0.3	-0.36	143200	68503.8	4.17329e+06	3.38078e+06	60.2	37.34	90.29	91.24	243421	143200	63245	102864	48724.1
FALSE	High	Master Protein	TGGT1_273460-t26_1-p1	transcript=TGGT1_273460-t26_1 | gene=TGGT1_273460 | organism=Toxoplasma_gondii_GT1 | gene_product=eukaryotic translation initiation factor 3 subunit 6 interacting protein | transcript_product=eukaryotic translation initiation factor 3 subunit 6 interacting protein | location=TGGT1_chrVIII:3489847-3495730(-) | protein_length=639 | sequence_SO=chromosome | SO=protein_coding	0	98.741	30	16	108	16	1	639	75	5.71	108.7	16	0.508	0.706	0.112144	0.0306804	0.273981	0.161762	0.21	7.42	0.511	0.508	0.158	0.622	0.777	0.706	-0.97	-0.98	-2.66	-0.68	-0.36	-0.5	1.39059e+06	636882	7.71834e+06	5.99504e+06	65.2	9.64	44.55	46.13	1.39059e+06	1.25343e+06	3.71159e+06	710465	636882
FALSE	High	Master Protein	TGGT1_280380-t26_1-p1	transcript=TGGT1_280380-t26_1 | gene=TGGT1_280380 | organism=Toxoplasma_gondii_GT1 | gene_product=poly(ADP-ribose) glycohydrolase | transcript_product=poly(ADP-ribose) glycohydrolase | location=TGGT1_chrVIIa:467123-469417(+) | protein_length=553 | sequence_SO=chromosome | SO=protein_coding	0	98.612	40	17	72	17	1	553	61.8	7.94	82.59	17	2.671	0.807	0.0927704	0.091173	0.269679	0.210162	53.32	0.86	2.671	1.71	5.838	0.814	0.807	0.599	1.42	0.77	2.55	-0.3	-0.31	-0.74	338740	960964	4.39683e+06	3.54793e+06	32.76	48.72	23.04	4.83	322987	561877	338740	862623	960964
FALSE	High	Master Protein	TGGT1_208030-t26_1-p1	transcript=TGGT1_208030-t26_1 | gene=TGGT1_208030 | organism=Toxoplasma_gondii_GT1 | gene_product=microneme protein MIC4 | transcript_product=microneme protein MIC4 | location=TGGT1_chrIb:547335-549077(+) | protein_length=580 | sequence_SO=chromosome | SO=protein_coding	0	98.347	31	12	148	12	1	580	63	5.22	226.96	12	0.355	0.803	0.0558089	0.0792327	0.230857	0.199549	0.15	8.93	0.355	0.352	0.655	0.728	0.803	0.906	-1.49	-1.51	-0.61	-0.46	-0.32	-0.14	1.09319e+07	3.8795e+06	1.66741e+07	1.33833e+07	36.89	72.17	34.23	41.63	1.09319e+07	6.67426e+06	1.45843e+07	3.8795e+06	2.34904e+06
FALSE	High	Master Protein	TGGT1_217890-t26_1-p1	transcript=TGGT1_217890-t26_1 | gene=TGGT1_217890 | organism=Toxoplasma_gondii_GT1 | gene_product=putative alkyl hydroperoxide reductase/ Thiol specific antioxidant/ Mal allergen | transcript_product=putative alkyl hydroperoxide reductase/ Thiol specific antioxidant/ Mal allergen | location=TGGT1_chrXII:2143499-2144089(-) | protein_length=196 | sequence_SO=chromosome | SO=protein_coding	0	98.179	55	9	151	9	1	196	21.7	6.87	200.84	9	0.778	0.98	0.127465	0.051845	0.280298	0.173383	1.61	0.61	0.962	0.778	0.764	0.99	0.98	0.975	-0.06	-0.36	-0.39	-0.01	-0.03	-0.04	701504	645804	1.40477e+07	1.37623e+07	16.7	18.3	78.98	78.43	701504	607335	845394	674533	472413
FALSE	High	Master Protein	TGGT1_262620-t26_1-p1	transcript=TGGT1_262620-t26_1 | gene=TGGT1_262620 | organism=Toxoplasma_gondii_GT1 | gene_product=RNA recognition motif-containing protein | transcript_product=RNA recognition motif-containing protein | location=TGGT1_chrVIIb:1093901-1096823(+) | protein_length=293 | sequence_SO=chromosome | SO=protein_coding	0	98.169	42	12	204	12	1	293	31.7	9.07	315.22	12	0.557	0.629	0.0672753	0.0669053	0.232613	0.185022	10.1	9.68	0.557	0.37	0.68	0.525	0.798	0.629	-0.84	-1.44	-0.56	-0.93	-0.33	-0.67	2.23293e+06	1.25316e+06	1.98091e+07	1.58091e+07	23.97	46.68	68.12	66.19	2.24893e+06	1.42387e+06	2.23293e+06	1.25316e+06	526569
FALSE	High	Master Protein	TGGT1_206470-t26_1-p1	transcript=TGGT1_206470-t26_1 | gene=TGGT1_206470 | organism=Toxoplasma_gondii_GT1 | gene_product=pyruvate dehydrogenase complex subunit PDH-E3II | transcript_product=pyruvate dehydrogenase complex subunit PDH-E3II | location=TGGT1_chrVIIa:922416-929013(+) | protein_length=519 | sequence_SO=chromosome | SO=protein_coding	0	98.028	36	14	74	14	1	519	55.1	7.03	113.46	14	0.946	0.99	0.533997	0.546934	0.617197	0.635752	3.87	11.72	0.946	2.14	0.918	1.07	0.99	0.746	-0.08	1.1	-0.12	0.1	-0.01	-0.42	280261	340222	4.71842e+06	4.66981e+06	25.86	29.38	86.57	67.37	280261	221326	370572	265053	473670
FALSE	High	Master Protein	TGGT1_210690-t26_1-p1	transcript=TGGT1_210690-t26_1 | gene=TGGT1_210690 | organism=Toxoplasma_gondii_GT1 | gene_product=ribosomal protein RPS6 | transcript_product=ribosomal protein RPS6 | location=TGGT1_chrIV:2087216-2087986(+) | protein_length=256 | sequence_SO=chromosome | SO=protein_coding	0	97.979	40	8	192	8	1	256	28.9	10.8	314.01	8	0.606	0.67	0.0541763	0.125775	0.230857	0.249108	5.42	10.35	0.666	0.415	0.606	0.67	0.911	0.566	-0.59	-1.27	-0.72	-0.58	-0.14	-0.82	1.18593e+06	790081	1.41382e+07	1.2873e+07	37.07	48.87	57.04	37.66	1.18593e+06	949115	1.90813e+06	790081	393869
FALSE	High	Master Protein	TGGT1_243710-t26_1-p1	transcript=TGGT1_243710-t26_1 | gene=TGGT1_243710 | organism=Toxoplasma_gondii_GT1 | gene_product=t-complex protein beta subunit | transcript_product=t-complex protein beta subunit | location=TGGT1_chrVI:2717493-2725570(+) | protein_length=568 | sequence_SO=chromosome | SO=protein_coding	0	97.825	35	15	99	15	1	568	61.4	5.92	106.49	15	0.055	0.975	0.0275616	0.457865	0.185323	0.56954	0.31	13.02	0.055	0.016	0.095	0.975	1.065	0.507	-4.19	-5.99	-3.39	-0.04	0.09	-0.98	2.59082e+06	141477	4.23655e+06	4.51322e+06	41.32	44.3	86.95	44.32	2.59082e+06	4.19103e+06	1.86326e+06	141477	66150.4
FALSE	High	Master Protein	TGGT1_316310-t26_1-p1	transcript=TGGT1_316310-t26_1 | gene=TGGT1_316310 | organism=Toxoplasma_gondii_GT1 | gene_product=superoxide dismutase | transcript_product=superoxide dismutase | location=TGGT1_chrXI:5175968-5177674(-) | protein_length=201 | sequence_SO=chromosome | SO=protein_coding	0	97.632	75	11	117	11	1	201	22.5	7.06	204.98	11	1.045	1.048	0.535519	0.79068	0.617208	0.837915	5.34	5.17	1.045	0.52	1.082	1.048	1.085	0.808	0.06	-0.94	0.11	0.07	0.12	-0.31	1.31044e+06	1.36618e+06	1.39845e+07	1.5174e+07	33.2	56.04	71.94	54.61	2.20019e+06	1.31044e+06	1.26221e+06	2.29859e+06	681181
FALSE	High	Master Protein	TGGT1_410360-t26_1-p1	transcript=TGGT1_410360-t26_1 | gene=TGGT1_410360 | organism=Toxoplasma_gondii_GT1 | gene_product=putative transmembrane protein | transcript_product=putative transmembrane protein | location=TGGT1_chrII:71310-72374(+) | protein_length=354 | sequence_SO=chromosome | SO=protein_coding	0	97.473	41	11	205	4	1	354	38.1	6.11	337.53	11	0.8	0.722	0.106496	0.0847591	0.270515	0.202256	8.57	2.36	0.873	0.631	0.8	0.906	0.722	0.7	-0.2	-0.66	-0.32	-0.14	-0.47	-0.51	317248	219889	4.50126e+06	3.84406e+06	56.34	69.32	55.79	46.64	721666	317248	274704	629781	200094
FALSE	High	Master Protein	TGGT1_293870-t26_1-p1	transcript=TGGT1_293870-t26_1 | gene=TGGT1_293870 | organism=Toxoplasma_gondii_GT1 | gene_product=putative thioredoxin | transcript_product=putative thioredoxin | location=TGGT1_chrIa:604538-605891(+) | protein_length=106 | sequence_SO=chromosome | SO=protein_coding	0	96.991	55	6	160	6	1	106	12	5.11	353.46	6	1.547	0.869	0.182546	0.0474886	0.315587	0.166604	27.86	0.96	1.547	3.625	1.256	0.869	0.877	0.775	0.63	1.86	0.33	-0.2	-0.19	-0.37	887106	1.97099e+06	1.43311e+07	1.25666e+07	52.15	19.55	76.29	69.18	887106	544381	1.56907e+06	1.37222e+06	1.97364e+06
FALSE	High	Master Protein	TGGT1_239260-t26_1-p1	transcript=TGGT1_239260-t26_1 | gene=TGGT1_239260 | organism=Toxoplasma_gondii_GT1 | gene_product=histone H4 | transcript_product=histone H4 | location=TGGT1_chrVI:491746-492057(-) | protein_length=103 | sequence_SO=chromosome | SO=protein_coding	0	95.696	52	8	365	8	1	103	11.4	11.36	519.55	8	0.696	0.743	0.00467503	0.182908	0.0794754	0.304599	0.37	20.9	0.745	0.692	0.696	0.743	0.932	0.52	-0.43	-0.53	-0.52	-0.43	-0.1	-0.94	9.39038e+06	6.53463e+06	9.08549e+07	8.47132e+07	25.09	28.89	57.84	31.45	1.16328e+07	6.95462e+06	9.39038e+06	8.66124e+06	4.81441e+06
FALSE	High	Master Protein	TGGT1_225930-t26_1-p1	transcript=TGGT1_225930-t26_1 | gene=TGGT1_225930 | organism=Toxoplasma_gondii_GT1 | gene_product=triose-phosphate isomerase TPI-I | transcript_product=triose-phosphate isomerase TPI-I | location=TGGT1_chrX:1833650-1835998(+) | protein_length=253 | sequence_SO=chromosome | SO=protein_coding	0	95.558	55	13	127	13	1	253	27.9	6.09	180.65	13	0.348	0.655	0.142232	0.0396763	0.285094	0.166604	1.59	2.02	0.348	0.318	0.887	0.635	0.655	0.806	-1.52	-1.65	-0.17	-0.66	-0.61	-0.31	1.40357e+06	445900	8.98458e+06	5.88893e+06	52.61	14.29	63.62	77.36	1.47291e+06	1.40357e+06	434409	513223	445900
FALSE	High	Master Protein	TGGT1_201780-t26_1-p1	transcript=TGGT1_201780-t26_1 | gene=TGGT1_201780 | organism=Toxoplasma_gondii_GT1 | gene_product=microneme protein MIC2 | transcript_product=microneme protein MIC2 | location=TGGT1_chrVIIa:3693727-3696991(-) | protein_length=769 | sequence_SO=chromosome | SO=protein_coding	0	95.468	21	12	102	12	1	769	82.6	4.83	153.97	12	0.71	1.304	0.788739	0.625637	0.832125	0.701263	47.47	33.7	0.71	0.259	2.87	1.304	1.6	0.722	-0.49	-1.95	1.52	0.38	0.68	-0.47	998839	714737	7.16284e+06	1.14602e+07	27.92	82.05	90.18	48.03	1.00678e+06	998839	585281	714737	258587
FALSE	High	Master Protein	TGGT1_318440-t26_1-p1	transcript=TGGT1_318440-t26_1 | gene=TGGT1_318440 | organism=Toxoplasma_gondii_GT1 | gene_product=helicase associated domain (ha2) protein | transcript_product=helicase associated domain (ha2) protein | location=TGGT1_chrIV:1264045-1277404(-) | protein_length=2234 | sequence_SO=chromosome | SO=protein_coding	0	95.352	16	22	39	22	1	2234	236.8	8.97	44.62	22	5.038	0.857	0.246059	0.420827	0.378411	0.538236	124.93	36.3	5.038	0.793	10.092	0.857	1.143	0.3	2.33	-0.34	3.34	-0.22	0.19	-1.74	81236.9	360544	761568	870231	123.87	18.96	113.89	45.87	81236.9	454809	27571.5	409294	360544
FALSE	High	Master Protein	TGGT1_313380-t26_1-p1	transcript=TGGT1_313380-t26_1 | gene=TGGT1_313380 | organism=Toxoplasma_gondii_GT1 | gene_product=hypothetical protein | transcript_product=hypothetical protein | location=TGGT1_chrXI:3292372-3294103(+) | protein_length=274 | sequence_SO=chromosome | SO=protein_coding	0	94.638	42	10	105	10	1	274	31.5	5.58	196.55	10	0.593	0.738	0.120647	0.040989	0.275847	0.166604	6.81	6.19	0.515	0.593	0.895	0.738	0.838	0.681	-0.96	-0.75	-0.16	-0.44	-0.26	-0.55	363062	239869	6.74585e+06	5.65215e+06	19.38	14.79	56.02	47.2	465417	363062	321058	239869	215237
FALSE	High	Master Protein	TGGT1_242070-t26_1-p1	transcript=TGGT1_242070-t26_1 | gene=TGGT1_242070 | organism=Toxoplasma_gondii_GT1 | gene_product=cAMP-dependent protein kinase regulatory subunit | transcript_product=cAMP-dependent protein kinase regulatory subunit | location=TGGT1_chrVI:1804976-1810461(-) | protein_length=385 | sequence_SO=chromosome | SO=protein_coding	0	94.003	39	13	129	13	1	385	42.8	5.21	158.96	13	1.98	1.176	0.100612	0.784595	0.269679	0.836288	3.58	14.89	1.932	1.98	5.612	1.294	1.176	0.764	0.95	0.99	2.49	0.37	0.23	-0.39	129141	453196	6.23132e+06	8.06571e+06	53.69	29.67	79.95	49.94	236998	129141	80760.3	457987	255730
FALSE	High	Master Protein	TGGT1_318310-t26_1-p1	transcript=TGGT1_318310-t26_1 | gene=TGGT1_318310 | organism=Toxoplasma_gondii_GT1 | gene_product=transketolase | transcript_product=transketolase | location=TGGT1_chrIV:1364235-1371398(-) | protein_length=699 | sequence_SO=chromosome | SO=protein_coding	0	93.554	32	14	70	14	1	699	76.9	6.89	91.29	14	0.589	0.584					0.31	3.19	0.593	0.589	0.01	0.547	0.677	0.584	-0.75	-0.76	-6.64	-0.87	-0.56	-0.78	837236	446453	5.38945e+06	3.65117e+06	21.47	14.07	68.84	66.18	681651	837236	1.0476e+06	404050	493305
FALSE	High	Master Protein	TGGT1_205710-t26_1-p1	transcript=TGGT1_205710-t26_1 | gene=TGGT1_205710 | organism=Toxoplasma_gondii_GT1 | gene_product=lysine-tRNA ligase | transcript_product=lysine-tRNA ligase | location=TGGT1_chrVIIa:1115364-1120007(+) | protein_length=658 | sequence_SO=chromosome | SO=protein_coding	0	93.127	35	17	67	17	1	658	74.3	6.71	78.9	17	0.279	0.698					12.72	1.5	0.722	0.108		0.698	0.684	0.764	-0.47	-3.21		-0.52	-0.55	-0.39	80733.2	22538.8	2.78992e+06	1.90825e+06	35.71	118.28	104.47	109.46	104506	62368.4		75504.3	6728.07
FALSE	High	Master Protein	TGGT1_310640-t26_1-p1	transcript=TGGT1_310640-t26_1 | gene=TGGT1_310640 | organism=Toxoplasma_gondii_GT1 | gene_product=phosphorylase family protein | transcript_product=phosphorylase family protein | location=TGGT1_chrXI:1460710-1463812(-) | protein_length=303 | sequence_SO=chromosome | SO=protein_coding	0	93.034	50	11	123	11	1	303	33	7.11	232.39	11	2.243	1.007	0.337761	0.659863	0.459355	0.730051	97.88	18.38	2.243	0.762	13.21	1.132	1.007	0.706	1.17	-0.39	3.72	0.18	0.01	-0.5	272129	515724	8.53111e+06	8.58953e+06	82.1	26.64	81.83	56.49	272129	460728	39041.9	610514	351258
FALSE	High	Master Protein	TGGT1_315270-t26_1-p1	transcript=TGGT1_315270-t26_1 | gene=TGGT1_315270 | organism=Toxoplasma_gondii_GT1 | gene_product=hypothetical protein | transcript_product=hypothetical protein | location=TGGT1_chrXI:4558433-4565813(-) | protein_length=780 | sequence_SO=chromosome | SO=protein_coding	0	92.458	35	14	64	14	1	780	84.5	5.24	62.05	14	0.318	0.753	0.295757	0.209147	0.418989	0.336795	1.51	8.76	0.286	1.345	0.318	0.753	0.831	0.341	-1.81	0.43	-1.65	-0.41	-0.27	-1.55	722355	406733	2.45083e+06	2.03683e+06	53.46	46.57	71.6	20.63	722355	427357	1.27994e+06	206430	574832
FALSE	High	Master Protein	TGGT1_280600-t26_1-p1	transcript=TGGT1_280600-t26_1 | gene=TGGT1_280600 | organism=Toxoplasma_gondii_GT1 | gene_product=putative histidyl-tRNA synthetase (HisRS) | transcript_product=putative histidyl-tRNA synthetase (HisRS) | location=TGGT1_chrVIIa:251998-256202(-) | protein_length=1252 | sequence_SO=chromosome | SO=protein_coding	0	90.649	17	16	58	16	1	1252	134.8	7.55	67.91	16	0.641	0.782	0.0277076	0.129266	0.185323	0.25356	5.59	9.5	0.531	0.641	0.7	0.782	0.864	0.566	-0.91	-0.64	-0.52	-0.35	-0.21	-0.82	474269	251854	2.38779e+06	2.06378e+06	48.85	58.71	91.34	69.09	474269	264190	746451	251854	169285
FALSE	High	Master Protein	TGGT1_209600-t26_1-p1	transcript=TGGT1_209600-t26_1 | gene=TGGT1_209600 | organism=Toxoplasma_gondii_GT1 | gene_product=hypothetical protein | transcript_product=hypothetical protein | location=TGGT1_chrIb:1372263-1374087(-) | protein_length=451 | sequence_SO=chromosome | SO=protein_coding	0	90.443	30	13	113	13	1	451	50.2	5.3	173.52	13	0.549	0.773	0.378343	0.0857607	0.491401	0.202256	34.01	1.06	0.549	1.382	0.132	0.773	0.782	0.551	-0.86	0.47	-2.92	-0.37	-0.35	-0.86	1.22775e+06	546052	8.24764e+06	6.44146e+06	65.26	43.47	74.07	52.31	1.22775e+06	395089	1.94672e+06	674513	546052
FALSE	High	Master Protein	TGGT1_248810-t26_1-p1	transcript=TGGT1_248810-t26_1 | gene=TGGT1_248810 | organism=Toxoplasma_gondii_GT1 | gene_product=nuclear factor NF7 | transcript_product=nuclear factor NF7 | location=TGGT1_chrXII:4119880-4123828(+) | protein_length=497 | sequence_SO=chromosome | SO=protein_coding	0	89.88	36	13	94	13	1	497	54.2	7.02	87.04	13	0.34	0.865	0.255895	0.490046	0.388124	0.58979	11.05	10.44	1.138	0.34	0.121	0.865	1.125	0.784	0.19	-1.56	-3.05	-0.21	0.17	-0.35	1.53209e+06	521227	4.96007e+06	5.57783e+06	22.5	79.3	64	49.77	1.03801e+06	1.53209e+06	1.62163e+06	1.18162e+06	521227
FALSE	High	Master Protein	TGGT1_320050-t26_1-p1	transcript=TGGT1_320050-t26_1 | gene=TGGT1_320050 | organism=Toxoplasma_gondii_GT1 | gene_product=ribosomal protein RPL5 | transcript_product=ribosomal protein RPL5 | location=TGGT1_chrIV:494655-497683(+) | protein_length=310 | sequence_SO=chromosome | SO=protein_coding	0	89.573	60	16	169	16	1	310	35.3	9.88	170.95	16	0.839	0.847	0.285958	0.475336	0.410813	0.584666	17.46	2.59	0.839	1.039	0.699	0.847	1.113	0.827	-0.25	0.05	-0.52	-0.24	0.15	-0.27	998336	708704	1.32782e+07	1.36623e+07	42.87	40.55	61.92	51.73	1.60627e+06	682230	998336	1.34785e+06	708704
FALSE	High	Master Protein	TGGT1_224850-t26_1-p1	transcript=TGGT1_224850-t26_1 | gene=TGGT1_224850 | organism=Toxoplasma_gondii_GT1 | gene_product=putative polyadenylate binding protein | transcript_product=putative polyadenylate binding protein | location=TGGT1_chrX:2687512-2689821(+) | protein_length=769 | sequence_SO=chromosome | SO=protein_coding	0	89.146	28	18	101	18	1	769	82.6	8.84	83.64	18	0.062	0.733					0.47	20.17	0.062	0.492	0.01	0.733	0.919	0.428	-4.02	-1.02	-6.64	-0.45	-0.12	-1.23	281123	202169	7.0771e+06	6.50128e+06	147.13	51.36	86.68	49.74	4.7943e+06	281123	253708	295798	138177
FALSE	High	Master Protein	TGGT1_227810-t26_1-p1	transcript=TGGT1_227810-t26_1 | gene=TGGT1_227810 | organism=Toxoplasma_gondii_GT1 | gene_product=rhoptry kinase family protein ROP11 (incomplete catalytic triad) | transcript_product=rhoptry kinase family protein ROP11 (incomplete catalytic triad) | location=TGGT1_chrX:715479-717059(+) | protein_length=526 | sequence_SO=chromosome | SO=protein_coding	0	89.101	39	14	69	14	1	526	58.2	8.4	107.84	14	0.547	0.84	0.154022	0.175397	0.297825	0.299423	2.81	5.68	0.547	0.582	0.142	0.84	0.886	0.572	-0.87	-0.78	-2.81	-0.25	-0.17	-0.81	386174	109301	5.18527e+06	4.59433e+06	77.58	57.51	66.38	40.5	386174	114866	768256	211370	66844.6
FALSE	High	Master Protein	TGGT1_289300-t26_1-p1	transcript=TGGT1_289300-t26_1 | gene=TGGT1_289300 | organism=Toxoplasma_gondii_GT1 | gene_product=methionyl-tRNA synthetase | transcript_product=methionyl-tRNA synthetase | location=TGGT1_chrIX:2966904-2971258(+) | protein_length=976 | sequence_SO=chromosome | SO=protein_coding	0	88.867	28	17	54	17	1	976	106	6.67	95	17	0.807	0.61	0.530396	0.0841351	0.614777	0.202256	42.15	5.92	0.455	0.807	1.345	0.61	0.675	0.356	-1.14	-0.31	0.43	-0.71	-0.57	-1.49	220354	158824	2.96772e+06	2.00394e+06	32.34	26.52	91.84	57.06	226673	220354	118120	103032	177802
FALSE	High	Master Protein	TGGT1_223940-t26_1-p1	transcript=TGGT1_223940-t26_1 | gene=TGGT1_223940 | organism=Toxoplasma_gondii_GT1 | gene_product=GAP45 protein | transcript_product=GAP45 protein | location=TGGT1_chrX:3344621-3345358(-) | protein_length=245 | sequence_SO=chromosome | SO=protein_coding	0	88.693	44	9	111	9	1	245	27.3	5.07	170	9	1.091	0.865	0.574093	0.228517	0.654273	0.360474	33.09	14.74	1.091	1.511	0.847	0.865	0.98	0.68	0.13	0.6	-0.24	-0.21	-0.03	-0.56	2.21093e+06	3.02295e+06	3.85557e+06	3.7773e+06	80.1	54.3	77.1	58.16	2.21093e+06	2.00029e+06	7.53456e+06	2.41189e+06	3.02295e+06
FALSE	High	Master Protein	TGGT1_288500-t26_1-p1	transcript=TGGT1_288500-t26_1 | gene=TGGT1_288500 | organism=Toxoplasma_gondii_GT1 | gene_product=FAD Malate-dehydrogenase (MDH-FAD) | transcript_product=FAD Malate-dehydrogenase (MDH-FAD) | location=TGGT1_chrIX:2391742-2395938(-) | protein_length=550 | sequence_SO=chromosome | SO=protein_coding	0	88.461	44	16	78	16	1	550	60.3	9.22	67.33	16	0.044	0.991					0.22	9.19	0.878	0.044	0.01	1.053	0.991	0.767	-0.19	-4.52	-6.64	0.07	-0.01	-0.38	879826	224712	4.12407e+06	4.34326e+06	97.62	66	74.15	56.24	424386	3.10639e+06	879826	372661	135499
FALSE	High	Master Protein	TGGT1_317720-t26_1-p1	transcript=TGGT1_317720-t26_1 | gene=TGGT1_317720 | organism=Toxoplasma_gondii_GT1 | gene_product=putative eukaryotic translation initiation factor 3 subunit 7 | transcript_product=putative eukaryotic translation initiation factor 3 subunit 7 | location=TGGT1_chrIV:2518527-2525070(+) | protein_length=609 | sequence_SO=chromosome | SO=protein_coding	0	88.177	35	14	75	14	1	609	68.7	6.93	76.51	14	0.786	0.857	0.0847128	0.142015	0.257931	0.266313	9.51	9.54	0.868	0.652	0.786	0.932	0.711	0.857	-0.2	-0.62	-0.35	-0.1	-0.49	-0.22	1.52179e+06	1.19688e+06	3.4481e+06	2.45036e+06	33.76	18.57	79.33	82.7	1.22138e+06	2.32429e+06	1.52179e+06	1.06017e+06	1.51519e+06
FALSE	High	Master Protein	TGGT1_309590-t26_1-p1	transcript=TGGT1_309590-t26_1 | gene=TGGT1_309590 | organism=Toxoplasma_gondii_GT1 | gene_product=rhoptry protein ROP1 | transcript_product=rhoptry protein ROP1 | location=TGGT1_chrXI:707942-709312(+) | protein_length=456 | sequence_SO=chromosome | SO=protein_coding	0	88.099	25	8	444	8	1	456	49.5	5.22	687.11	8	0.872	0.848	0.0987229	0.0597552	0.269679	0.183309	5.47	6.67	0.872	0.914	0.755	0.848	0.916	0.795	-0.2	-0.13	-0.4	-0.24	-0.13	-0.33	7.1003e+06	5.36283e+06	8.30558e+07	7.04124e+07	46.45	49.29	33.51	26.6	1.33668e+07	5.75934e+06	7.1003e+06	1.16563e+07	5.26608e+06
FALSE	High	Master Protein	TGGT1_249180-t26_1-p1	transcript=TGGT1_249180-t26_1 | gene=TGGT1_249180 | organism=Toxoplasma_gondii_GT1 | gene_product=bifunctional dihydrofolate reductase-thymidylate synthase | transcript_product=bifunctional dihydrofolate reductase-thymidylate synthase | location=TGGT1_chrXII:4294324-4300363(-) | protein_length=610 | sequence_SO=chromosome | SO=protein_coding	0	87.78	37	16	48	16	1	610	68.7	7.24	77.83	16	0.45	0.72	0.231663	0.177397	0.365599	0.301575	0.12	15	1.094	0.449	0.45	0.861	0.72	0.411	0.13	-1.16	-1.15	-0.22	-0.47	-1.28	225744	112235	3.16298e+06	2.27826e+06	37.66	9.26	111.62	77.87	111922	250200	225744	122416	112235
FALSE	High	Master Protein	TGGT1_244200-t26_1-p1	transcript=TGGT1_244200-t26_1 | gene=TGGT1_244200 | organism=Toxoplasma_gondii_GT1 | gene_product=putative 2-oxoglutarate dehydrogenase e1 component, mitochondrial precursor | transcript_product=putative 2-oxoglutarate dehydrogenase e1 component, mitochondrial precursor | location=TGGT1_chrVI:3022117-3029688(-) | protein_length=1116 | sequence_SO=chromosome | SO=protein_coding	0	87.757	20	13	34	13	1	1116	124.2	7.11	60.5	13	1.118	0.329					13.81	0.21	1.227	1.019		0.325	0.607	0.329	0.29	0.03		-1.62	-0.72	-1.6	30467.3	34059.6	2.9815e+06	1.81086e+06	39.99	51.75	61.18	47.14	40747	22780.9		49990.9	23205.4
FALSE	High	Master Protein	TGGT1_266060-t26_1-p1	transcript=TGGT1_266060-t26_1 | gene=TGGT1_266060 | organism=Toxoplasma_gondii_GT1 | gene_product=ribosomal protein RPSA | transcript_product=ribosomal protein RPSA | location=TGGT1_chrIX:1148543-1150882(-) | protein_length=287 | sequence_SO=chromosome | SO=protein_coding	0	87.512	68	12	143	12	1	287	31.5	5.31	194.85	12	0.317	0.682	0.0354953	0.0173621	0.20114	0.149741	0.65	5.84	0.548	0.317	0.303	0.618	0.74	0.682	-0.87	-1.66	-1.72	-0.69	-0.44	-0.55	1.46334e+06	481694	1.27162e+07	9.07396e+06	29.46	51.03	73.92	74.39	1.46334e+06	867799	1.58784e+06	801478	275322
FALSE	High	Master Protein	TGGT1_291930-t26_1-p1	transcript=TGGT1_291930-t26_1 | gene=TGGT1_291930 | organism=Toxoplasma_gondii_GT1 | gene_product=RNA recognition motif-containing protein | transcript_product=RNA recognition motif-containing protein | location=TGGT1_chrIX:4212023-4217780(+) | protein_length=705 | sequence_SO=chromosome | SO=protein_coding	0	87.103	19	11	103	11	1	705	73.1	5.43	150.02	11	2.311	1.214	0.364857	0.0501804	0.481381	0.169203	30.85	7.43	2.311	2.792	0.701	1.214	1.368	1.153	1.21	1.48	-0.51	0.28	0.45	0.21	599289	999168	3.22281e+06	3.91322e+06	37.88	41.93	71.11	64.24	599289	357915	801491	1.38485e+06	999168
FALSE	High	Master Protein	TGGT1_231410-t26_1-p1	transcript=TGGT1_231410-t26_1 | gene=TGGT1_231410 | organism=Toxoplasma_gondii_GT1 | gene_product=hypothetical protein | transcript_product=hypothetical protein | location=TGGT1_chrVIII:1401693-1406022(+) | protein_length=571 | sequence_SO=chromosome | SO=protein_coding	0	87.067	36	16	57	16	1	571	64.6	8.19	75.23	16	2.255	0.519					97.83	1.88	0.767	2.255	100	0.684	0.519	0.494	-0.38	1.17	6.64	-0.55	-0.95	-1.02	126994	161578	3.54241e+06	2.2193e+06	73.1	31.59	81.13	69.75	225038	71665.7		172564	161578
FALSE	High	Master Protein	TGGT1_251500-t26_1-p1	transcript=TGGT1_251500-t26_1 | gene=TGGT1_251500 | organism=Toxoplasma_gondii_GT1 | gene_product=putative eukaryotic initiation factor-3, subunit 3 | transcript_product=putative eukaryotic initiation factor-3, subunit 3 | location=TGGT1_chrXII:5353371-5356184(+) | protein_length=600 | sequence_SO=chromosome | SO=protein_coding	0	87.05	28	13	63	13	1	600	65.6	8.15	76.48	13	0.046	0.764					0.24	6.04	0.119	0.046	0.01	0.711	0.764	0.96	-3.07	-4.46	-6.64	-0.49	-0.39	-0.06	733997	68809.9	4.32078e+06	3.07146e+06	70.45	87.47	62.4	78.75	1.18875e+06	733997	195192	141729	33407.3
FALSE	High	Master Protein	TGGT1_320220-t26_1-p1	transcript=TGGT1_320220-t26_1 | gene=TGGT1_320220 | organism=Toxoplasma_gondii_GT1 | gene_product=putative ubiquinol cytochrome c oxidoreductase | transcript_product=putative ubiquinol cytochrome c oxidoreductase | location=TGGT1_chrIV:370998-374481(-) | protein_length=487 | sequence_SO=chromosome | SO=protein_coding	0	86.838	40	11	96	11	1	487	54.8	9.23	115.98	11	13.909	0.844	0.0210289	0.103981	0.15842	0.226868	46.8	9.45	13.909	9.519	38.793	0.844	0.919	0.733	3.8	3.25	5.28	-0.25	-0.12	-0.45	247203	2.35306e+06	3.852e+06	3.54086e+06	66.44	40.66	78.04	66.79	276084	247203	45074.2	3.83998e+06	2.35306e+06
FALSE	High	Master Protein	TGGT1_271050-t26_1-p1	transcript=TGGT1_271050-t26_1 | gene=TGGT1_271050 | organism=Toxoplasma_gondii_GT1 | gene_product=SAG-related sequence SRS34A | transcript_product=SAG-related sequence SRS34A | location=TGGT1_chrVIII:4754604-4755164(+) | protein_length=186 | sequence_SO=chromosome | SO=protein_coding	0	86.507	42	6	304	6	1	186	19	7.97	680.74	6	0.691	0.696	0.011723	0.0364485	0.116211	0.165233	0.69	2.51	0.684	0.768	0.691	0.696	0.823	0.671	-0.55	-0.38	-0.53	-0.52	-0.28	-0.57	5.48941e+06	3.75579e+06	6.53291e+07	5.37335e+07	54.33	51.09	96.27	89.52	5.48941e+06	3.3739e+06	1.00861e+07	3.75579e+06	2.59049e+06
FALSE	High	Master Protein	TGGT1_205250-t26_1-p1	transcript=TGGT1_205250-t26_1 | gene=TGGT1_205250 | organism=Toxoplasma_gondii_GT1 | gene_product=rhoptry protein ROP18 | transcript_product=rhoptry protein ROP18 | location=TGGT1_chrVIIa:1426782-1428446(-) | protein_length=554 | sequence_SO=chromosome | SO=protein_coding	0	85.945	23	11	137	11	1	554	62.3	9.25	199.66	11	0.038	0.098					0.15	0.68	0.161	0.038	0.01	0.221	0.098	0.051	-2.64	-4.74	-6.64	-2.18	-3.36	-4.3	736450	72138.8	1.37763e+07	1.6978e+06	31.19	105.23	57.15	45.46	1.17339e+06	736450	681721	188331	27632.3
FALSE	High	Master Protein	TGGT1_263180-t26_1-p1	transcript=TGGT1_263180-t26_1 | gene=TGGT1_263180 | organism=Toxoplasma_gondii_GT1 | gene_product=myosin D | transcript_product=myosin D | location=TGGT1_chrVIIb:714013-721737(-) | protein_length=822 | sequence_SO=chromosome | SO=protein_coding	0	85.877	29	19	53	19	1	822	91	8.34	48.39	19	0.075	0.692	0.103773	0.0249252	0.269679	0.158898	0.11	0.02	0.552	0.065	0.075	0.691	0.692	0.806	-0.86	-3.94	-3.74	-0.53	-0.53	-0.31	376265	26012.1	3.98877e+06	2.75902e+06	21.84	126.71	71.19	80.16	376265	398499	258522	207778	26012.1
FALSE	High	Master Protein	TGGT1_313140-t26_1-p1	transcript=TGGT1_313140-t26_1 | gene=TGGT1_313140 | organism=Toxoplasma_gondii_GT1 | gene_product=isocitrate dehydrogenase | transcript_product=isocitrate dehydrogenase | location=TGGT1_chrXI:3095680-3101525(-) | protein_length=621 | sequence_SO=chromosome | SO=protein_coding	0	85.362	22	11	82	10	1	621	68.3	8.59	98.65	11	0.755	0.641					1.34	1.21	0.755	0.767	0.01	0.641	0.711	0.628	-0.41	-0.38	-6.64	-0.64	-0.49	-0.67	145439	135965	5.43323e+06	3.86457e+06	54.3	64.91	69.99	65.45	295750	107954	145439	223280	82795.7
FALSE	High	Master Protein	TGGT1_277080-t26_1-p1	transcript=TGGT1_277080-t26_1 | gene=TGGT1_277080 | organism=Toxoplasma_gondii_GT1 | gene_product=microneme protein MIC5 | transcript_product=microneme protein MIC5 | location=TGGT1_chrXII:6631512-6633486(-) | protein_length=181 | sequence_SO=chromosome | SO=protein_coding	0	85.349	49	6	114	6	1	181	19.9	4.94	179.03	6	1.97	0.984	0.193345	0.482094	0.327323	0.5854	49.71	8.39	6.767	1.97	1.309	0.984	0.767	1.041	2.76	0.98	0.39	-0.02	-0.38	0.06	481288	924141	8.63483e+06	7.05582e+06	57.37	26.97	38.54	49.91	136573	560158	481288	924141	1.10325e+06
FALSE	High	Master Protein	TGGT1_319920-t26_1-p1	transcript=TGGT1_319920-t26_1 | gene=TGGT1_319920 | organism=Toxoplasma_gondii_GT1 | gene_product=2-oxo acid dehydrogenases acyltransferase (catalytic domain) domain-containing protein | transcript_product=2-oxo acid dehydrogenases acyltransferase (catalytic domain) domain-containing protein | location=TGGT1_chrIV:604302-610675(-) | protein_length=669 | sequence_SO=chromosome | SO=protein_coding	0	85.258	22	11	70	11	1	669	70.2	6.8	123.97	11	0.426	0.85	0.257518	0.120934	0.388487	0.243766	23.91	0.06	0.426	0.839	0.047	0.851	0.85	0.629	-1.23	-0.25	-4.4	-0.23	-0.23	-0.67	423801	180525	3.23918e+06	2.75611e+06	66.96	61.23	83.44	65.05	423801	259520	961395	180525	217720
FALSE	High	Master Protein	TGGT1_244110-t26_1-p1	transcript=TGGT1_244110-t26_1 | gene=TGGT1_244110 | organism=Toxoplasma_gondii_GT1 | gene_product=nucleosome assembly protein (nap) protein | transcript_product=nucleosome assembly protein (nap) protein | location=TGGT1_chrVI:2942300-2948890(+) | protein_length=738 | sequence_SO=chromosome | SO=protein_coding	0	84.864	17	10	83	10	1	738	83.9	8.6	122.7	10	0.69	0.827	0.776651	0.0790415	0.823048	0.199549	27.53	1.49	0.69	2.153	0.421	0.839	0.66	0.827	-0.54	1.11	-1.25	-0.25	-0.6	-0.27	304624	210188	5.98271e+06	3.94811e+06	27.26	59.19	61.54	68.1	304624	218395	382958	210188	470112
FALSE	High	Master Protein	TGGT1_236540-t26_1-p1	transcript=TGGT1_236540-t26_1 | gene=TGGT1_236540 | organism=Toxoplasma_gondii_GT1 | gene_product=RNA recognition motif-containing protein | transcript_product=RNA recognition motif-containing protein | location=TGGT1_chrX:5301444-5305442(+) | protein_length=508 | sequence_SO=chromosome | SO=protein_coding	0	84.471	26	10	111	10	1	508	53	6.42	143.86	10	9.992	0.696	0.00630677	0.00301836	0.0926306	0.141622	5.48	1.09	9.623	9.992	17.741	0.707	0.66	0.696	3.27	3.32	4.15	-0.5	-0.6	-0.52	601808	5.98706e+06	6.31182e+06	4.16888e+06	23.81	62.04	72.05	73.27	601808	599185	887634	5.79104e+06	5.98706e+06
FALSE	High	Master Protein	TGGT1_297500-t26_1-p1	transcript=TGGT1_297500-t26_1 | gene=TGGT1_297500 | organism=Toxoplasma_gondii_GT1 | gene_product=T-complex protein 1 eta subunit | transcript_product=T-complex protein 1 eta subunit | location=TGGT1_chrII:1806900-1814443(-) | protein_length=546 | sequence_SO=chromosome | SO=protein_coding	0	84.337	26	11	72	11	1	546	59.4	5.96	101.74	11	1.173	0.715	0.72546	0.0584027	0.781633	0.180517	42.1	6.07	1.173	1.506	0.314	0.772	0.715	0.555	0.23	0.59	-1.67	-0.37	-0.48	-0.85	247120	289825	4.80461e+06	3.43575e+06	41.86	79.45	84.79	67.29	247120	286890	114189	289825	432003
FALSE	High	Master Protein	TGGT1_290200-t26_1-p1	transcript=TGGT1_290200-t26_1 | gene=TGGT1_290200 | organism=Toxoplasma_gondii_GT1 | gene_product=NAD/NADP octopine/nopaline dehydrogenase, alpha-helical domain-containing protein | transcript_product=NAD/NADP octopine/nopaline dehydrogenase, alpha-helical domain-containing protein | location=TGGT1_chrIX:3448166-3452814(-) | protein_length=435 | sequence_SO=chromosome | SO=protein_coding	0	83.954	38	12	72	12	1	435	48	7.27	96.98	12	0.741	0.78	0.465856	0.118755	0.557388	0.243766	38.44	7.54	1.335	0.741	0.391	0.78	0.846	0.561	0.42	-0.43	-1.36	-0.36	-0.24	-0.83	205304	156295	4.96154e+06	4.19532e+06	59.24	85.13	65.47	43.17	205304	210973	49062.2	274033	156295
FALSE	High	Master Protein	TGGT1_234190-t26_1-p1	transcript=TGGT1_234190-t26_1 | gene=TGGT1_234190 | organism=Toxoplasma_gondii_GT1 | gene_product=putative serine hydroxymethyltransferase 2 | transcript_product=putative serine hydroxymethyltransferase 2 | location=TGGT1_chrX:4074410-4078362(-) | protein_length=595 | sequence_SO=chromosome | SO=protein_coding	0	83.422	30	10	71	10	1	595	65.2	8.02	65.66	10	0.882	0.692	0.585807	0.0621245	0.662252	0.183795	98.65	5.14	0.882	1.887	0.128	0.742	0.692	0.506	-0.18	0.92	-2.97	-0.43	-0.53	-0.98	387974	226148	5.18637e+06	3.58772e+06	52.16	71.14	82.63	61.37	387974	119847	395822	342266	226148
FALSE	High	Master Protein	TGGT1_229180-t26_1-p1	transcript=TGGT1_229180-t26_1 | gene=TGGT1_229180 | organism=Toxoplasma_gondii_GT1 | gene_product=HEAT repeat-containing protein | transcript_product=HEAT repeat-containing protein | location=TGGT1_chrVIII:71618-81573(-) | protein_length=1238 | sequence_SO=chromosome | SO=protein_coding	0	83.29	17	15	32	15	1	1238	136	4.79	34.07	15	3.442	3.22					36.44	72.43	3.442	100	2.596	4.793	3.22	0.93	1.78	6.64	1.38	2.26	1.69	-0.11	89891.3	281582	1.24615e+06	3.95339e+06	13.29	5.74	96.36	18.89	81808.3		98772.9	281582	285424
FALSE	High	Master Protein	TGGT1_229360-t26_1-p1	transcript=TGGT1_229360-t26_1 | gene=TGGT1_229360 | organism=Toxoplasma_gondii_GT1 | gene_product=transaldolase | transcript_product=transaldolase | location=TGGT1_chrVIII:196233-200460(-) | protein_length=550 | sequence_SO=chromosome | SO=protein_coding	0	83.143	30	13	67	13	1	550	61.4	9.25	90.84	13	0.541	0.877	0.232336	0.271436	0.365599	0.401253	18.97	16.49	0.305	0.541	1.024	0.877	1.003	0.681	-1.72	-0.89	0.03	-0.19	0.01	-0.55	264192	155941	5.08999e+06	5.10768e+06	46.26	27.43	74.17	54.06	511992	264192	227485	155941	142953
FALSE	High	Master Protein	TGGT1_233110-t26_1-p1	transcript=TGGT1_233110-t26_1 | gene=TGGT1_233110 | organism=Toxoplasma_gondii_GT1 | gene_product=IMP dehydrogenasa | transcript_product=IMP dehydrogenasa | location=TGGT1_chrVIII:2418359-2423494(+) | protein_length=551 | sequence_SO=chromosome | SO=protein_coding	0	83.12	40	15	70	15	1	551	59	7.23	51.02	15	0.906	0.813					33.49	11.11	1.156	0.906	0.01	0.914	0.813	0.721	0.21	-0.14	-6.64	-0.13	-0.3	-0.47	106675	65269.8	3.21134e+06	2.61202e+06	77.01	116.55	89.34	79.12	181905	22363	106675	210201	20267
FALSE	High	Master Protein	TGGT1_202680-t26_1-p1	transcript=TGGT1_202680-t26_1 | gene=TGGT1_202680 | organism=Toxoplasma_gondii_GT1 | gene_product=putative peptidase M16, alpha subunit | transcript_product=putative peptidase M16, alpha subunit | location=TGGT1_chrVIIa:3006392-3012675(-) | protein_length=563 | sequence_SO=chromosome | SO=protein_coding	0	82.643	31	13	74	13	1	563	62.1	8.32	94.58	13	0.319	0.739	0.0961581	0.0307345	0.269679	0.161762	2.89	2.94	0.724	0.319	0.258	0.766	0.739	0.626	-0.47	-1.65	-1.95	-0.38	-0.44	-0.68	316771	101183	5.79173e+06	4.28067e+06	37.35	79.87	91.46	81.3	321689	316771	149386	233032	101183
FALSE	High	Master Protein	TGGT1_311240-t26_1-p1	transcript=TGGT1_311240-t26_1 | gene=TGGT1_311240 | organism=Toxoplasma_gondii_GT1 | gene_product=putative DnaJ family chaperone | transcript_product=putative DnaJ family chaperone | location=TGGT1_chrXI:1865804-1870827(-) | protein_length=426 | sequence_SO=chromosome | SO=protein_coding	0	81.979	33	12	77	12	1	426	47.4	6.84	105.15	12	0.457	0.78	0.109424	0.0748759	0.272034	0.197626	8.56	7.91	0.457	0.793	0.331	0.78	0.897	0.711	-1.13	-0.33	-1.6	-0.36	-0.16	-0.49	650884	297416	3.67392e+06	3.29614e+06	19.13	24.96	74.84	64.82	650884	506069	747363	297416	401332
FALSE	High	Master Protein	TGGT1_235930-t26_1-p1	transcript=TGGT1_235930-t26_1 | gene=TGGT1_235930 | organism=Toxoplasma_gondii_GT1 | gene_product=domain K- type RNA binding proteins family protein | transcript_product=domain K- type RNA binding proteins family protein | location=TGGT1_chrX:5075263-5081044(+) | protein_length=570 | sequence_SO=chromosome | SO=protein_coding	0	81.895	24	13	77	13	1	570	64.2	9.94	106.31	13	1.114	0.817	0.409691	0.0561831	0.515644	0.177696	25.33	0.24	0.924	1.114	2.193	0.819	0.671	0.817	-0.11	0.16	1.13	-0.29	-0.58	-0.29	377229	393125	2.81064e+06	2.30235e+06	56.06	38.7	99.63	103.88	377229	617285	179289	348553	687897
FALSE	High	Master Protein	TGGT1_297060-t26_1-p1	transcript=TGGT1_297060-t26_1 | gene=TGGT1_297060 | organism=Toxoplasma_gondii_GT1 | gene_product=phosphoglycerate mutase PGMII | transcript_product=phosphoglycerate mutase PGMII | location=TGGT1_chrII:1486715-1490594(-) | protein_length=339 | sequence_SO=chromosome | SO=protein_coding	0	81.689	43	12	88	12	1	339	38.1	8.13	88.12	12	0.938	1.138	0.486741	0.273551	0.575624	0.40292	25.67	20.51	0.938	1.123	0.557	1.336	1.138	0.981	-0.09	0.17	-0.84	0.42	0.19	-0.03	1.16556e+06	713263	5.10531e+06	6.53656e+06	49.71	42.21	80.64	66.59	1.16556e+06	409594	1.2808e+06	1.09345e+06	459857
FALSE	High	Master Protein	TGGT1_292920-t26_1-p1	transcript=TGGT1_292920-t26_1 | gene=TGGT1_292920 | organism=Toxoplasma_gondii_GT1 | gene_product=putative heat shock protein 75 | transcript_product=putative heat shock protein 75 | location=TGGT1_chrIa:3979-11415(+) | protein_length=861 | sequence_SO=chromosome | SO=protein_coding	0	81.674	30	18	40	18	1	861	95.1	6.13	39.43	18	0.593	0.533	0.144627	0.109289	0.286446	0.232239	10.58	15.47	0.593	0.473	0.916	0.533	0.768	0.337	-0.75	-1.08	-0.13	-0.91	-0.38	-1.57	556687	330135	2.38376e+06	1.57709e+06	12.27	45.83	70.82	30.7	556687	475178	608151	330135	224613
FALSE	High	Master Protein	TGGT1_205510-t26_1-p1	transcript=TGGT1_205510-t26_1 | gene=TGGT1_205510 | organism=Toxoplasma_gondii_GT1 | gene_product=putative nucleolar protein 5 | transcript_product=putative nucleolar protein 5 | location=TGGT1_chrVIIa:1272709-1276843(-) | protein_length=490 | sequence_SO=chromosome | SO=protein_coding	0	81.427	43	15	40	15	1	490	54.3	9.04	64.19	15	0.129	0.581	0.0521206	0.0374489	0.230857	0.166301	0.63	7.37	0.129	0.096	0.385	0.496	0.713	0.581	-2.96	-3.39	-1.38	-1.01	-0.49	-0.78	609543	105999	2.51537e+06	1.79266e+06	21.09	70.95	99.14	97.17	824481	560995	609543	105999	53603.6
FALSE	High	Master Protein	TGGT1_207440-t26_1-p1	transcript=TGGT1_207440-t26_1 | gene=TGGT1_207440 | organism=Toxoplasma_gondii_GT1 | gene_product=ribosomal protein RPS4 | transcript_product=ribosomal protein RPS4 | location=TGGT1_chrIb:77395-80548(-) | protein_length=312 | sequence_SO=chromosome | SO=protein_coding	0	81.043	45	14	179	14	1	312	35.5	10.18	123.38	14	0.741	0.789	0.259545	0.164168	0.389317	0.285347	26.11	16.03	0.741	0.979	0.399	0.789	0.955	0.652	-0.43	-0.03	-1.33	-0.34	-0.07	-0.62	1.52353e+06	994355	1.50225e+07	1.43416e+07	29.31	39.19	55.87	38.51	1.87351e+06	1.01601e+06	1.52353e+06	1.38843e+06	994355
FALSE	High	Master Protein	TGGT1_278660-t26_1-p1	transcript=TGGT1_278660-t26_1 | gene=TGGT1_278660 | organism=Toxoplasma_gondii_GT1 | gene_product=putative P-type ATPase4 | transcript_product=putative P-type ATPase4 | location=TGGT1_chrXII:5863040-5875230(+) | protein_length=1338 | sequence_SO=chromosome | SO=protein_coding	0	81.003	18	15	32	15	1	1338	144.6	6.18	54.36	15	26.934	0.45					255.26	3.56	100	7.255		0.45	0.504	0.053	6.64	2.86		-1.15	-0.99	-4.25	6463.24	23154.3	583360	262789		85.97	167.23	127.65		6463.24		11434	46888.2
FALSE	High	Master Protein	TGGT1_313390-t26_1-p1	transcript=TGGT1_313390-t26_1 | gene=TGGT1_313390 | organism=Toxoplasma_gondii_GT1 | gene_product=ribosomal protein RPL6 | transcript_product=ribosomal protein RPL6 | location=TGGT1_chrXI:3299999-3300967(+) | protein_length=322 | sequence_SO=chromosome | SO=protein_coding	0	80.894	36	14	136	14	1	322	36.3	10.78	186.26	14	0.523	0.679	0.0342384	0.0547747	0.200625	0.174934	8.6	6.67	0.523	0.637	0.413	0.612	0.824	0.679	-0.93	-0.65	-1.28	-0.71	-0.28	-0.56	1.17076e+06	572520	1.70832e+07	1.40834e+07	44.29	45.29	63.86	61.07	2.0656e+06	898679	1.17076e+06	1.08108e+06	572520
FALSE	High	Master Protein	TGGT1_234380-t26_1-p1	transcript=TGGT1_234380-t26_1 | gene=TGGT1_234380 | organism=Toxoplasma_gondii_GT1 | gene_product=hypothetical protein | transcript_product=hypothetical protein | location=TGGT1_chrX:4225477-4226948(+) | protein_length=347 | sequence_SO=chromosome | SO=protein_coding	0	80.836	39	12	109	12	1	347	38.6	7.12	109.32	12	1.104	1.707	0.420533	0.148413	0.523102	0.272758	25.08	3.1	2.491	0.917	1.104	1.707	1.743	1.051	1.32	-0.12	0.14	0.77	0.8	0.07	270369	316043	4.12373e+06	7187783	19.86	34.48	56.27	24.81	193404	270369	286232	481698	248018
FALSE	High	Master Protein	TGGT1_411470-t26_1-p1	transcript=TGGT1_411470-t26_1 | gene=TGGT1_411470 | organism=Toxoplasma_gondii_GT1 | gene_product=putative transmembrane protein | transcript_product=putative transmembrane protein | location=AAQM03000493:218-1321(-) | protein_length=367 | sequence_SO=contig | SO=protein_coding	0	80.698	34	10	119	1	1	367	40.3	7.44	176.18	10	0.071	0.917					2.62	14.99	0.506	0.01		0.755	1.027	0.917	-0.98	-6.64		-0.4	0.04	-0.12	63053.8	28316.4	334354	280102	16.93		65.1	67.63	55908.8	71112.1		28316.4
FALSE	High	Master Protein	TGGT1_268835-t26_1-p1	transcript=TGGT1_268835-t26_1 | gene=TGGT1_268835 | organism=Toxoplasma_gondii_GT1 | gene_product=hypothetical protein | transcript_product=hypothetical protein | location=TGGT1_chrVIII:6256688-6265329(+) | protein_length=669 | sequence_SO=chromosome | SO=protein_coding	0	80.615	23	13	49	13	1	669	76	6.83	72.09	13	6.711	1.235	0.0380028	0.995793	0.206657	0.996966	25.93	27.89	23.491	6.711	5.538	1.468	1.235	0.554	4.55	2.75	2.47	0.55	0.31	-0.85	18835.4	138054	1.6549e+06	2.04453e+06	73.08	23.3	121.77	78	5876.76	18835.4	34838.5	138054	126410
FALSE	High	Master Protein	TGGT1_215220-t26_1-p1	transcript=TGGT1_215220-t26_1 | gene=TGGT1_215220 | organism=Toxoplasma_gondii_GT1 | gene_product=hypothetical protein | transcript_product=hypothetical protein | location=TGGT1_chrX:6716950-6719044(+) | protein_length=502 | sequence_SO=chromosome | SO=protein_coding	0	79.858	45	13	92	13	1	502	55.1	5.36	134.85	13	0.627	0.865	0.11454	0.233201	0.275441	0.362685	11.47	17.21	0.627	0.363	0.75	0.865	0.999	0.728	-0.67	-1.46	-0.41	-0.21	0	-0.46	414377	310935	6.16802e+06	5.33404e+06	86.59	88.91	52.59	37.32	1.02075e+06	134473	414377	640028	48750.2
FALSE	High	Master Protein	TGGT1_220950-t26_1-p1	transcript=TGGT1_220950-t26_1 | gene=TGGT1_220950 | organism=Toxoplasma_gondii_GT1 | gene_product=hypothetical protein | transcript_product=hypothetical protein | location=TGGT1_chrII:72817-74397(+) | protein_length=334 | sequence_SO=chromosome | SO=protein_coding	0	79.377	40	9	154	4	1	334	35.6	5.25	295.87	9	1.172	1.008	0.166782	0.465111	0.303781	0.575047	10.12	6.06	1.092	1.172	1.551	0.967	1.008	1.435	0.13	0.23	0.63	-0.05	0.01	0.52	280942	435728	9.02741e+06	9.10294e+06	74.17	61.03	8.96	31.92	906666	277558	280942	989923	325239
FALSE	High	Master Protein	TGGT1_230420-t26_1-p1	transcript=TGGT1_230420-t26_1 | gene=TGGT1_230420 | organism=Toxoplasma_gondii_GT1 | gene_product=sarco/endoplasmic reticulum Ca2+-ATPase | transcript_product=sarco/endoplasmic reticulum Ca2+-ATPase | location=TGGT1_chrVIII:760295-772731(+) | protein_length=1093 | sequence_SO=chromosome | SO=protein_coding	0	79.293	21	16	43	16	1	1093	118.8	5.43	50.25	16	0.173	0.762					4.19	23.97	0.852	0.173	0.01	0.762	0.974	0.483	-0.23	-2.53	-6.64	-0.39	-0.04	-1.05	140424	69782.1	1.90634e+06	1.85767e+06	55.09	69.6	100.07	66.27	140424	235109	71577.3	119618	40709.3
FALSE	High	Master Protein	TGGT1_255260-t26_1-p1	transcript=TGGT1_255260-t26_1 | gene=TGGT1_255260 | organism=Toxoplasma_gondii_GT1 | gene_product=apical membrane antigen AMA1 | transcript_product=apical membrane antigen AMA1 | location=TGGT1_chrVIIb:4856406-4860874(+) | protein_length=569 | sequence_SO=chromosome | SO=protein_coding	0	79.037	31	10	81	10	1	569	63	6.16	93.87	10	1.003	0.942	0.72128	0.602492	0.780589	0.680569	11.15	6.39	1.003	1.168	0.928	0.942	1.771	0.896	0	0.22	-0.11	-0.09	0.82	-0.16	862152	1.00739e+06	2.46608e+06	4.36859e+06	54.55	48.51	111.68	89.54	437701	862152	1.42558e+06	439017	1.00739e+06
FALSE	High	Master Protein	TGGT1_226410-t26_1-p1	transcript=TGGT1_226410-t26_1 | gene=TGGT1_226410 | organism=Toxoplasma_gondii_GT1 | gene_product=EF-1 guanine nucleotide exchange domain-containing protein | transcript_product=EF-1 guanine nucleotide exchange domain-containing protein | location=TGGT1_chrX:1563878-1565889(-) | protein_length=328 | sequence_SO=chromosome | SO=protein_coding	0	79.036	36	10	136	10	1	328	36	5.16	212.83	10	0.601	0.737	0.102387	0.057439	0.269679	0.178894	10.63	7.52	0.72	0.601	0.347	0.737	0.805	0.602	-0.47	-0.74	-1.53	-0.44	-0.31	-0.73	1.43599e+06	805688	1.08329e+07	8.72526e+06	43.06	27.36	56.45	40.6	1.43599e+06	983472	2.32128e+06	1.0342e+06	590883
FALSE	High	Master Protein	TGGT1_232410-t26_1-p1	transcript=TGGT1_232410-t26_1 | gene=TGGT1_232410 | organism=Toxoplasma_gondii_GT1 | gene_product=PDI family protein | transcript_product=PDI family protein | location=TGGT1_chrVIII:2074655-2076392(-) | protein_length=220 | sequence_SO=chromosome | SO=protein_coding	0	78.761	65	10	154	10	1	220	24.9	6.4	273.28	10	0.746	0.953	0.37259	0.286841	0.487233	0.417969	38.97	4.04	1.098	0.746	0.136	0.953	0.771	0.981	0.14	-0.42	-2.88	-0.07	-0.37	-0.03	1.6381e+06	1.79941e+06	1.69722e+07	1.30925e+07	129.28	38.72	43.95	51.8	1.6381e+06	1.09465e+06	1.33951e+07	1.79941e+06	816825
FALSE	High	Master Protein	TGGT1_207840-t26_1-p1	transcript=TGGT1_207840-t26_1 | gene=TGGT1_207840 | organism=Toxoplasma_gondii_GT1 | gene_product=ribosomal protein RPS17 | transcript_product=ribosomal protein RPS17 | location=TGGT1_chrIb:342658-344358(-) | protein_length=132 | sequence_SO=chromosome | SO=protein_coding	0	78.384	61	8	104	8	1	132	15.2	10.7	150.71	8	0.852	0.643	0.828617	0.00344876	0.86686	0.141622	48.32	0.63	1.863	0.852	0.469	0.596	0.65	0.643	0.9	-0.23	-1.09	-0.75	-0.62	-0.64	417940	400909	1.01745e+07	6.61106e+06	44.9	44.98	58.32	60.4	415533	417940	854290	774144	356040
FALSE	High	Master Protein	TGGT1_205558-t26_1-p1	transcript=TGGT1_205558-t26_1 | gene=TGGT1_205558 | organism=Toxoplasma_gondii_GT1 | gene_product=NAC domain-containing protein | transcript_product=NAC domain-containing protein | location=TGGT1_chrVIIa:1246583-1248351(+) | protein_length=189 | sequence_SO=chromosome | SO=protein_coding	0	78.272	56	7	114	7	1	189	20.5	5.49	192.46	7	0.818	0.752	0.0994188	0.0610771	0.269679	0.183795	5.74	1.13	0.818	0.866	0.648	0.762	0.752	0.566	-0.29	-0.21	-0.63	-0.39	-0.41	-0.82	1.48701e+06	1.28736e+06	5.47578e+06	4.11878e+06	56	39.84	59.74	40.91	1.18976e+06	1.48701e+06	3.2309e+06	973711	1.28736e+06
FALSE	High	Master Protein	TGGT1_260260-t26_1-p1	transcript=TGGT1_260260-t26_1 | gene=TGGT1_260260 | organism=Toxoplasma_gondii_GT1 | gene_product=ribosomal protein RPP1 | transcript_product=ribosomal protein RPP1 | location=TGGT1_chrVIIb:2389422-2391225(-) | protein_length=179 | sequence_SO=chromosome | SO=protein_coding	0	78.184	49	6	57	6	1	179	18.8	4.91	80.52	6	0.684	0.652	0.0149725	0.0456139	0.119681	0.166604	2.64	7.08	0.684	0.71	0.6	0.579	0.787	0.652	-0.55	-0.49	-0.74	-0.79	-0.35	-0.62	2.82599e+06	2.00546e+06	4.63128e+06	3.64595e+06	74.83	65.6	109.91	107.77	2.38557e+06	2.82599e+06	8.53088e+06	1.63067e+06	2.00546e+06
FALSE	High	Master Protein	TGGT1_268200-t26_1-p1	transcript=TGGT1_268200-t26_1 | gene=TGGT1_268200 | organism=Toxoplasma_gondii_GT1 | gene_product=RNA recognition motif-containing protein | transcript_product=RNA recognition motif-containing protein | location=TGGT1_chrVIII:6648500-6651532(+) | protein_length=648 | sequence_SO=chromosome | SO=protein_coding	0	77.838	29	11	71	11	1	648	66.4	8.41	109.01	11	1.184	0.778					43.02	0.7	1.184	1.528	0.01	0.778	0.784	0.617	0.24	0.61	-6.64	-0.36	-0.35	-0.7	207731	307232	3.93129e+06	3.08392e+06	54.75	55.5	88.11	74.07	392855	132849	207731	465135	202934
FALSE	High	Master Protein	TGGT1_243960-t26_1-p1	transcript=TGGT1_243960-t26_1 | gene=TGGT1_243960 | organism=Toxoplasma_gondii_GT1 | gene_product=nuclear transport factor 2 (ntf2) domain-containing protein | transcript_product=nuclear transport factor 2 (ntf2) domain-containing protein | location=TGGT1_chrVI:2828443-2833407(-) | protein_length=797 | sequence_SO=chromosome | SO=protein_coding	0	77.809	24	14	49	14	1	797	84.1	9.04	42.31	14	0.467	0.725	0.417175	0.236228	0.520512	0.363703	9.62	10.44	0.467	1.557	0.327	0.628	1.038	0.725	-1.1	0.64	-1.61	-0.67	0.05	-0.46	121335	83532.3	2.52683e+06	2.6221e+06	43.62	85.05	65.94	59.64	179050	121335	71110.9	83532.3	188922
FALSE	High	Master Protein	TGGT1_216650-t26_1-p1	transcript=TGGT1_216650-t26_1 | gene=TGGT1_216650 | organism=Toxoplasma_gondii_GT1 | gene_product=S15 sporozoite-expressed protein | transcript_product=S15 sporozoite-expressed protein | location=TGGT1_chrXI:5902644-5904672(-) | protein_length=400 | sequence_SO=chromosome | SO=protein_coding	0	77.623	25	9	75	9	1	400	45.1	7.28	118.83	9	0.548	0.523	0.379742	0.0344686	0.491401	0.162729	30.68	1.67	0.548	1.393	0.171	0.523	0.501	0.705	-0.87	0.48	-2.55	-0.94	-1	-0.5	313417	171869	4.40906e+06	2.30558e+06	59.83	45.28	70.09	88.9	313417	198419	641798	171869	276378
FALSE	High	Master Protein	TGGT1_211030-t26_1-p1	transcript=TGGT1_211030-t26_1 | gene=TGGT1_211030 | organism=Toxoplasma_gondii_GT1 | gene_product=hypothetical protein | transcript_product=hypothetical protein | location=TGGT1_chrIV:1889471-1891938(-) | protein_length=191 | sequence_SO=chromosome | SO=protein_coding	0	77.345	71	10	78	10	1	191	22.2	5.82	131.61	10	0.062	0.793	0.0464768	0.439545	0.213062	0.55383	0.32	11.24	0.01	0.097	0.062	0.793	0.698	1.163	-6.64	-3.36	-4	-0.33	-0.52	0.22	4.67178e+07	1.5052e+06	5.30478e+06	3.70038e+06	55.07	88.21	69.12	95.03	4.67178e+07	1.54966e+07	5.82241e+07	418924	1.5052e+06
FALSE	High	Master Protein	TGGT1_250820-t26_1-p1	transcript=TGGT1_250820-t26_1 | gene=TGGT1_250820 | organism=Toxoplasma_gondii_GT1 | gene_product=hypothetical protein | transcript_product=hypothetical protein | location=TGGT1_chrXII:5170586-5175102(+) | protein_length=1156 | sequence_SO=chromosome | SO=protein_coding	0	77.285	20	17	39	17	1	1156	120.8	9.25	40.26	17	2.189	0.551	0.0897661	0.105568	0.263486	0.227893	50.31	15.12	1.446	2.189	3.549	0.326	0.551	0.736	0.53	1.13	1.83	-1.62	-0.86	-0.44	195824	369139	1.37208e+06	756472	18.94	40.78	94.11	119.72	244509	168631	195824	353598	369139
FALSE	High	Master Protein	TGGT1_211290-t26_1-p1	transcript=TGGT1_211290-t26_1 | gene=TGGT1_211290 | organism=Toxoplasma_gondii_GT1 | gene_product=rhoptry protein ROP15 | transcript_product=rhoptry protein ROP15 | location=TGGT1_chrIV:1780392-1782862(-) | protein_length=333 | sequence_SO=chromosome | SO=protein_coding	0	77.219	44	10	58	10	1	333	36.6	8.7	69.04	10	1.256	0.527					109.35	3.28	0.33	1.256	100	0.485	0.775	0.527	-1.6	0.33	6.64	-1.04	-0.37	-0.92	262541	141430	4.58571e+06	3.35793e+06	37.69	43	76.65	67.18	344989	199797		113683	250860
FALSE	High	Master Protein	TGGT1_320600-t26_1-p1	transcript=TGGT1_320600-t26_1 | gene=TGGT1_320600 | organism=Toxoplasma_gondii_GT1 | gene_product=cold-shock DNA-binding domain-containing protein | transcript_product=cold-shock DNA-binding domain-containing protein | location=TGGT1_chrIV:154209-155894(+) | protein_length=209 | sequence_SO=chromosome | SO=protein_coding	0	77.167	38	6	132	6	1	209	23.1	9.82	251.46	6	0.737	0.708	0.142547	0.0244433	0.285094	0.1583	6.17	1.42	0.737	0.959	0.681	0.708	0.811	0.695	-0.44	-0.06	-0.56	-0.5	-0.3	-0.53	2.05597e+06	1.44359e+06	1.17973e+07	9.56956e+06	24.03	33.93	79.4	73.98	1.32711e+06	2.05597e+06	2.12109e+06	978159	1.97121e+06
FALSE	High	Master Protein	TGGT1_275690-t26_1-p1	transcript=TGGT1_275690-t26_1 | gene=TGGT1_275690 | organism=Toxoplasma_gondii_GT1 | gene_product=putative ClpB | transcript_product=putative ClpB | location=TGGT1_chrIII:255659-267189(+) | protein_length=1022 | sequence_SO=chromosome | SO=protein_coding	0	77.066	17	12	31	12	1	1022	114.5	7.9	46.78	12	1.362	1.112					147.17	20.76	1.362	0.01	100	1.268	1.112	0.474	0.45	-6.64	6.64	0.34	0.15	-1.08	49272.1	101322	913483	1.01594e+06	19.51	70.84	114.46	63.48	42884.2	56611.6		58425.2
FALSE	High	Master Protein	TGGT1_205700-t26_1-p1	transcript=TGGT1_205700-t26_1 | gene=TGGT1_205700 | organism=Toxoplasma_gondii_GT1 | gene_product=cyclophilin precursor | transcript_product=cyclophilin precursor | location=TGGT1_chrVIIa:1122121-1123167(+) | protein_length=348 | sequence_SO=chromosome | SO=protein_coding	0	76.729	25	9	177	9	1	348	38.2	8.75	284.36	9	0.836	0.905	0.213924	0.0538653	0.343625	0.174421	6.23	0.19	0.836	1.011	0.786	0.905	0.823	0.906	-0.26	0.02	-0.35	-0.14	-0.28	-0.14	1.69767e+06	1.41899e+06	1.55757e+07	1.40885e+07	41.06	31.12	74.72	77.33	1.69767e+06	822079	2.02541e+06	1.41899e+06	831182
FALSE	High	Master Protein	TGGT1_265450-t26_1-p1	transcript=TGGT1_265450-t26_1 | gene=TGGT1_265450 | organism=Toxoplasma_gondii_GT1 | gene_product=hexokinase | transcript_product=hexokinase | location=TGGT1_chrIX:1363173-1366449(-) | protein_length=468 | sequence_SO=chromosome | SO=protein_coding	0	76.653	28	12	87	12	1	468	51.4	6.23	112.03	12	0.896	1.014	0.275997	0.389995	0.401611	0.511634	12.51	0.83	0.896	0.99	0.671	1.014	1.009	1.487	-0.16	-0.01	-0.58	0.02	0.01	0.57	719314	482691	6.05133e+06	6.13792e+06	59.68	59.08	56.17	79.97	803623	179471	719314	719838	177670
FALSE	High	Master Protein	TGGT1_313230-t26_1-p1	transcript=TGGT1_313230-t26_1 | gene=TGGT1_313230 | organism=Toxoplasma_gondii_GT1 | gene_product=eukaryotic initiation factor-2, alpha subunit | transcript_product=eukaryotic initiation factor-2, alpha subunit | location=TGGT1_chrXI:3161335-3165437(-) | protein_length=347 | sequence_SO=chromosome | SO=protein_coding	0	76.03	44	11	78	11	1	347	39.1	4.84	113.21	11	0.924	0.782					3.19	13.59	0.947	0.924	0.01	0.782	0.921	0.665	-0.08	-0.11	-6.64	-0.35	-0.12	-0.59	90216.6	95694.6	2.27298e+06	2.07689e+06	54.37	69.87	98.94	85.28	173622	60274	90216.6	164448	55686.1
FALSE	High	Master Protein	TGGT1_245460-t26_1-p1	transcript=TGGT1_245460-t26_1 | gene=TGGT1_245460 | organism=Toxoplasma_gondii_GT1 | gene_product=ribosomal protein RPS8 | transcript_product=ribosomal protein RPS8 | location=TGGT1_chrXII:2220293-2224095(-) | protein_length=205 | sequence_SO=chromosome | SO=protein_coding	0	75.91	43	7	156	7	1	205	23.4	10.64	285.12	7	1.209	1.05	0.165638	0.481555	0.303781	0.5854	18.47	14.73	1.209	1.498	1.058	1.05	1.208	0.946	0.27	0.58	0.08	0.07	0.27	-0.08	972736	1.12451e+06	9.11999e+06	9.94919e+06	42.16	30.48	88.5	78.28	972736	424060	1.06262e+06	1.17584e+06	635390
FALSE	High	Master Protein	TGGT1_278990-t26_1-p1	transcript=TGGT1_278990-t26_1 | gene=TGGT1_278990 | organism=Toxoplasma_gondii_GT1 | gene_product=putative phosphate carrier | transcript_product=putative phosphate carrier | location=TGGT1_chrXII:5622211-5625652(-) | protein_length=479 | sequence_SO=chromosome | SO=protein_coding	0	75.848	23	9	85	9	1	479	53.1	9.41	95.34	9	0.187	0.83	0.0874368	0.111537	0.258509	0.232648	1.31	0.95	0.187	0.592	0.14	0.838	0.61	0.83	-2.42	-0.76	-2.83	-0.26	-0.71	-0.27	652848	122372	6.90102e+06	4.69031e+06	22.99	55.22	75.23	84.24	652848	449610	716517	122372	266099
FALSE	High	Master Protein	TGGT1_253290-t26_1-p1	transcript=TGGT1_253290-t26_1 | gene=TGGT1_253290 | organism=Toxoplasma_gondii_GT1 | gene_product=valyl-tRNA synthetase | transcript_product=valyl-tRNA synthetase | location=TGGT1_chrIII:807307-819700(+) | protein_length=1106 | sequence_SO=chromosome | SO=protein_coding	0	75.125	18	14	45	14	1	1106	124.8	6.64	46.76	14	0.46	0.905	0.904311	0.479752	0.927032	0.5854	14.61	31.79	0.245	0.46	14.928	0.905	1.142	0.574	-2.03	-1.12	3.9	-0.14	0.19	-0.8	149839	68888.1	2.1771e+06	2.48612e+06	73.79	103.17	80.88	46.73	193007	149839	20988.4	47355.6	68888.1
FALSE	High	Master Protein	TGGT1_228170-t26_1-p1	transcript=TGGT1_228170-t26_1 | gene=TGGT1_228170 | organism=Toxoplasma_gondii_GT1 | gene_product=inner membrane complex protein IMC2A | transcript_product=inner membrane complex protein IMC2A | location=TGGT1_chrX:431147-436956(-) | protein_length=1596 | sequence_SO=chromosome | SO=protein_coding	0	74.995	11	18	47	18	1	1596	182.2	5.94	42.44	18	1.119	1.016					93.73	13.69	1.827	1.119	0.01	0.922	1.207	1.016	0.87	0.16	-6.64	-0.12	0.27	0.02	50416.9	107925	1.86302e+06	1.71752e+06	73.03	80.71	82.46	80.46	113014	50416.9	24135.5	206438	56422.6
FALSE	High	Master Protein	TGGT1_232130-t26_1-p1	transcript=TGGT1_232130-t26_1 | gene=TGGT1_232130 | organism=Toxoplasma_gondii_GT1 | gene_product=hypothetical protein | transcript_product=hypothetical protein | location=TGGT1_chrVIII:1876792-1879382(+) | protein_length=456 | sequence_SO=chromosome | SO=protein_coding	0	74.815	40	12	76	12	1	456	48.8	9.91	77.25	12	0.435	0.725	0.350309	0.162698	0.468011	0.285347	12.61	3.95	1.43	0.435	0.239	0.725	0.762	0.347	0.52	-1.2	-2.06	-0.46	-0.39	-1.53	106610	147243	2.93361e+06	2.12663e+06	72.97	66.36	66.62	18.16	106610	338614	106088	152448	147243
FALSE	High	Master Protein	TGGT1_214290-t26_1-p1	transcript=TGGT1_214290-t26_1 | gene=TGGT1_214290 | organism=Toxoplasma_gondii_GT1 | gene_product=DJ-1 family protein | transcript_product=DJ-1 family protein | location=TGGT1_chrX:6106825-6108652(+) | protein_length=256 | sequence_SO=chromosome | SO=protein_coding	0	74.801	54	10	85	10	1	256	27.9	9.04	156.79	10	0.882	0.729	0.897074	0.0851685	0.924259	0.202256	13.03	7.24	0.882	1.597	0.782	0.532	0.796	0.729	-0.18	0.68	-0.35	-0.91	-0.33	-0.46	210248	335868	5.57412e+06	4.16225e+06	77.81	53.98	105.89	110.91	177886	210248	667449	156863	335868
FALSE	High	Master Protein	TGGT1_250710-t26_1-p1	transcript=TGGT1_250710-t26_1 | gene=TGGT1_250710 | organism=Toxoplasma_gondii_GT1 | gene_product=microneme protein MIC10 | transcript_product=microneme protein MIC10 | location=TGGT1_chrXII:5071359-5071955(+) | protein_length=198 | sequence_SO=chromosome | SO=protein_coding	0	74.728	28	8	148	8	1	198	23.1	5.87	224.99	8	1.124	0.928	0.33617	0.017648	0.459355	0.149741	9.47	2.14	0.956	1.195	1.124	0.944	0.912	0.928	-0.06	0.26	0.17	-0.08	-0.13	-0.11	2.11439e+06	2.3759e+06	1.18593e+07	1.10108e+07	30.95	40.76	13.81	12.22	1.73555e+06	3.12767e+06	2.11439e+06	1.65977e+06	3.73895e+06
FALSE	High	Master Protein	TGGT1_234450-t26_1-p1	transcript=TGGT1_234450-t26_1 | gene=TGGT1_234450 | organism=Toxoplasma_gondii_GT1 | gene_product=ribosomal protein RPS15A | transcript_product=ribosomal protein RPS15A | location=TGGT1_chrX:4292801-4294683(+) | protein_length=231 | sequence_SO=chromosome | SO=protein_coding	0	74.253	34	8	76	8	1	231	26.6	9.67	92.03	8	1.129	0.962	0.276575	0.310597	0.401611	0.434955	12.04	3.2	1.037	1.129	1.739	0.985	0.962	0.773	0.05	0.17	0.8	-0.02	-0.06	-0.37	116865	181880	4.56743e+06	4.39475e+06	68.85	50.16	105.81	93.8	329473	116865	104613	341754	131934
FALSE	High	Master Protein	TGGT1_297070-t26_1-p1	transcript=TGGT1_297070-t26_1 | gene=TGGT1_297070 | organism=Toxoplasma_gondii_GT1 | gene_product=hypothetical protein | transcript_product=hypothetical protein | location=TGGT1_chrII:1492810-1494671(-) | protein_length=519 | sequence_SO=chromosome | SO=protein_coding	0	73.745	26	8	80	8	1	519	58.1	6.33	82.59	8	1.15	0.621	0.500751	0.0295212	0.585875	0.161762	44.14	5.21	1.15	0.807	2.238	0.677	0.621	0.498	0.2	-0.31	1.16	-0.56	-0.69	-1.01	254056	292047	6.42315e+06	3.98717e+06	39.38	8.86	52.57	35.91	254056	338735	145422	292047	273448
FALSE	High	Master Protein	TGGT1_263050-t26_1-p1	transcript=TGGT1_263050-t26_1 | gene=TGGT1_263050 | organism=Toxoplasma_gondii_GT1 | gene_product=ribosomal protein RPL13 | transcript_product=ribosomal protein RPL13 | location=TGGT1_chrVIIb:826699-830544(-) | protein_length=355 | sequence_SO=chromosome | SO=protein_coding	0	73.187	24	9	159	9	1	355	39.7	11.18	172.72	9	0.345	0.755	0.037132	0.00347113	0.206657	0.141622	1.23	0.43	0.573	0.321	0.345	0.759	0.755	0.718	-0.8	-1.64	-1.54	-0.4	-0.41	-0.48	2.25314e+06	774680	1.5981e+07	12063671	5.12	32.36	45.88	42.5	2.25314e+06	2.4128e+06	2.18519e+06	1.29085e+06	774680
FALSE	High	Master Protein	TGGT1_235970-t26_1-p1	transcript=TGGT1_235970-t26_1 | gene=TGGT1_235970 | organism=Toxoplasma_gondii_GT1 | gene_product=putative eukaryotic initiation factor-2 gamma | transcript_product=putative eukaryotic initiation factor-2 gamma | location=TGGT1_chrX:5097473-5103737(+) | protein_length=465 | sequence_SO=chromosome | SO=protein_coding	0	72.742	32	11	86	11	1	465	50.5	8.21	98.51	11	6.451	0.943	0.0996586	0.382114	0.269679	0.505678	89.88	10	1.707	6.451	10.363	0.943	1.015	0.563	0.77	2.69	3.37	-0.08	0.02	-0.83	74851.1	659741	4.38178e+06	4.13341e+06	103.44	18.56	86.03	52.17	386411	74851.1	67078.2	659741	482895
FALSE	High	Master Protein	TGGT1_248480-t26_1-p1	transcript=TGGT1_248480-t26_1 | gene=TGGT1_248480 | organism=Toxoplasma_gondii_GT1 | gene_product=ribosomal protein RPS9 | transcript_product=ribosomal protein RPS9 | location=TGGT1_chrXII:3816916-3818776(+) | protein_length=188 | sequence_SO=chromosome | SO=protein_coding	0	72.633	41	9	157	9	1	188	21.7	10.51	209.33	9	0.557	0.757	0.0637374	0.0329075	0.232613	0.161762	11.05	6.37	0.691	0.388	0.557	0.813	0.757	0.675	-0.53	-1.37	-0.84	-0.3	-0.4	-0.57	819409	541518	9.17998e+06	7.26547e+06	11.81	30.89	77.37	68.07	819409	781313	972630	565907	303083
FALSE	High	Master Protein	TGGT1_305050-t26_1-p1	transcript=TGGT1_305050-t26_1 | gene=TGGT1_305050 | organism=Toxoplasma_gondii_GT1 | gene_product=putative calmodulin | transcript_product=putative calmodulin | location=TGGT1_chrIX:4983149-4983550(+) | protein_length=133 | sequence_SO=chromosome | SO=protein_coding	0	72.53	75	9	77	9	1	133	15.3	5.05	74.48	9	0.566	0.553	0.120029	0.00835687	0.275847	0.149741	1.9	0.85	0.209	0.566	0.589	0.543	0.553	0.637	-2.26	-0.82	-0.76	-0.88	-0.85	-0.65	2.08674e+06	1.18157e+06	4.59056e+06	2.53948e+06	72.37	94.66	87.81	96.24	1.28104e+06	2.08674e+06	5.19152e+06	267727	1.18157e+06
FALSE	High	Master Protein	TGGT1_219270-t26_1-p1	transcript=TGGT1_219270-t26_1 | gene=TGGT1_219270 | organism=Toxoplasma_gondii_GT1 | gene_product=multi-pass transmembrane protein | transcript_product=multi-pass transmembrane protein | location=TGGT1_chrXII:948336-949904(+) | protein_length=389 | sequence_SO=chromosome | SO=protein_coding	0	72.495	24	4	99	4	1	389	43	4.94	111.55	4	22.319	0.783	0.00127562	0.156075	0.0684324	0.282253	2.45	1.04	16.306	22.319	22.689	0.438	0.783	0.791	4.03	4.48	4.5	-1.19	-0.35	-0.34	175676	3.92093e+06	1.36855e+06	1.0709e+06	82.41	91.89	113.09	122.65	170244	175676	643850	2.77603e+06	3.92093e+06
FALSE	High	Master Protein	TGGT1_262670-t26_1-p1	transcript=TGGT1_262670-t26_1 | gene=TGGT1_262670 | organism=Toxoplasma_gondii_GT1 | gene_product=ribosomal protein RPL18A | transcript_product=ribosomal protein RPL18A | location=TGGT1_chrVIIb:1067095-1069205(+) | protein_length=183 | sequence_SO=chromosome | SO=protein_coding	0	72.299	53	10	136	10	1	183	21.3	10.65	213.26	10	1.057	1.032	0.351008	0.603838	0.468011	0.680569	6.07	2.54	1.057	1.685	1.013	1.032	1.049	0.767	0.08	0.75	0.02	0.04	0.07	-0.38	614665	622819	1.13385e+07	1.18963e+07	42.6	26.24	78.09	60.14	903557	368338	614665	954624	620532
FALSE	High	Master Protein	TGGT1_260440-t26_1-p1	transcript=TGGT1_260440-t26_1 | gene=TGGT1_260440 | organism=Toxoplasma_gondii_GT1 | gene_product=nuclear factor NF3 | transcript_product=nuclear factor NF3 | location=TGGT1_chrVIIb:2242975-2247472(-) | protein_length=312 | sequence_SO=chromosome | SO=protein_coding	0	72.204	36	9	98	9	1	312	34.1	4.31	230.66	9	0.471	0.765	0.13805	0.0629654	0.282094	0.183795	15.65	9.66	0.779	0.471	0.246	0.866	0.68	0.765	-0.36	-1.09	-2.02	-0.21	-0.56	-0.39	1.97619e+06	929813	7.54801e+06	5.13087e+06	103.45	128.05	37.83	36.02	5.9327e+06	1.97619e+06	380427	4.62235e+06	929813
FALSE	High	Master Protein	TGGT1_240060-t26_1-p1	transcript=TGGT1_240060-t26_1 | gene=TGGT1_240060 | organism=Toxoplasma_gondii_GT1 | gene_product=hypothetical protein | transcript_product=hypothetical protein | location=TGGT1_chrVI:1027949-1030621(+) | protein_length=844 | sequence_SO=chromosome | SO=protein_coding	0	71.75	30	14	69	14	1	844	88.7	10.89	46.02	14	1.299	0.912					96.84	4	1.299	0.451	100	0.912	0.942	0.597	0.38	-1.15	6.64	-0.13	-0.09	-0.74	209702	73863.6	4.31833e+06	4.06708e+06	34.16	99.36	46.56	20.45	268304	163899		348654	73863.6
FALSE	High	Master Protein	TGGT1_309752-t26_1-p1	transcript=TGGT1_309752-t26_1 | gene=TGGT1_309752 | organism=Toxoplasma_gondii_GT1 | gene_product=putative succinate-Coenzyme A ligase, beta subunit | transcript_product=putative succinate-Coenzyme A ligase, beta subunit | location=TGGT1_chrXI:749202-752425(+) | protein_length=498 | sequence_SO=chromosome | SO=protein_coding	0	71.745	24	9	74	9	1	498	53.4	6.48	63.74	9	0.408	0.886	0.301738	0.257414	0.424514	0.384706	4.59	10.59	1.289	0.408	0.332	0.886	0.967	0.627	0.37	-1.29	-1.59	-0.17	-0.05	-0.67	279147	92601.4	3.52473e+06	3.12309e+06	18.5	91.39	81.77	57.78	298425	206707	279147	384557	84256.4
FALSE	High	Master Protein	TGGT1_310150-t26_1-p1	transcript=TGGT1_310150-t26_1 | gene=TGGT1_310150 | organism=Toxoplasma_gondii_GT1 | gene_product=AMP-binding enzyme domain-containing protein | transcript_product=AMP-binding enzyme domain-containing protein | location=TGGT1_chrXI:1055873-1060273(-) | protein_length=866 | sequence_SO=chromosome | SO=protein_coding	0	71.573	20	14	40	13	1	866	95.9	7.24	40.18	14	0.058	0.645					0.41	9.75	0.206	0.058	0.01	0.645	1.285	0.543	-2.28	-4.12	-6.64	-0.63	0.36	-0.88	718238	61644.8	1.48074e+06	1.27101e+06	49.43	53.49	101.88	73.02	446542	718238	1.22138e+06	91776.3	41406
FALSE	High	Master Protein	TGGT1_321620-t26_1-p1	transcript=TGGT1_321620-t26_1 | gene=TGGT1_321620 | organism=Toxoplasma_gondii_GT1 | gene_product=dynamin-related protein DRPB | transcript_product=dynamin-related protein DRPB | location=TGGT1_chrIb:1696372-1706596(+) | protein_length=860 | sequence_SO=chromosome | SO=protein_coding	0	71.348	29	16	49	16	1	860	95.9	6.3	62.76	16	12.318	0.502	0.0007434	0.0812859	0.0684324	0.202256	11.31	3.1	14.402	12.318	11.379	0.502	0.799	0.461	3.85	3.62	3.51	-0.99	-0.32	-1.12	844566	1.21634e+07	2.2121e+06	1.443e+06	35.02	28.15	88.99	70.02	844566	677497	1.31642e+06	1.21634e+07	8.34574e+06
FALSE	High	Master Protein	TGGT1_253820-t26_1-p1	transcript=TGGT1_253820-t26_1 | gene=TGGT1_253820 | organism=Toxoplasma_gondii_GT1 | gene_product=hypothetical protein | transcript_product=hypothetical protein | location=TGGT1_chrIII:1203300-1205132(+) | protein_length=226 | sequence_SO=chromosome | SO=protein_coding	0	71.299	63	10	49	10	1	226	25.2	5.2	69.32	10	8.891	0.916	0.105532	0.700419	0.270515	0.766142	47.31	41.31	11.728	8.891	1.673	1.324	0.612	0.916	3.55	3.15	0.74	0.41	-0.71	-0.13	135624	1.03617e+06	3.31416e+06	2.9032e+06	111.81	26.32	73.28	74.41	59591.1	135624	619250	698861	1.2058e+06
FALSE	High	Master Protein	TGGT1_273520-t26_1-p1	transcript=TGGT1_273520-t26_1 | gene=TGGT1_273520 | organism=Toxoplasma_gondii_GT1 | gene_product=PCI domain-containing protein | transcript_product=PCI domain-containing protein | location=TGGT1_chrVIII:3416534-3423842(+) | protein_length=601 | sequence_SO=chromosome | SO=protein_coding	0	71.042	27	12	69	12	1	601	67.3	6.73	98.55	12	0.716	0.503	0.129179	0.0152872	0.280298	0.149741	12.71	3.14	0.716	0.917	0.596	0.461	0.608	0.503	-0.48	-0.12	-0.75	-1.12	-0.72	-0.99	511741	468530	3.19244e+06	1.93979e+06	76.39	57.27	94.14	90.91	511741	510852	1.7216e+06	366399	468530
FALSE	High	Master Protein	TGGT1_311400-t26_1-p1	transcript=TGGT1_311400-t26_1 | gene=TGGT1_311400 | organism=Toxoplasma_gondii_GT1 | gene_product=WD domain, G-beta repeat-containing protein | transcript_product=WD domain, G-beta repeat-containing protein | location=TGGT1_chrXI:2010353-2023624(-) | protein_length=1585 | sequence_SO=chromosome | SO=protein_coding	0	70.85	15	15	36	15	1	1585	165.5	6.6	36.75	15	100	1.408					0	63.6	100			2.037	1.408	0.804	6.64			1.03	0.49	-0.31		17844.4	803440	1.13144e+06			110.44	71.11				17844.4
FALSE	High	Master Protein	TGGT1_314100-t26_1-p1	transcript=TGGT1_314100-t26_1 | gene=TGGT1_314100 | organism=Toxoplasma_gondii_GT1 | gene_product=tetratricopeptide repeat-containing protein | transcript_product=tetratricopeptide repeat-containing protein | location=TGGT1_chrXI:3881643-3887836(+) | protein_length=580 | sequence_SO=chromosome | SO=protein_coding	0	70.783	24	8	26	8	1	580	64.2	5.38	57	8	56.179	1.148					115.65	2.26	56.179	8.525	100	1.148	1.166	0.756	5.81	3.09	6.64	0.2	0.22	-0.4	31119.1	668570	980792	1.14342e+06	102.94	55.44	106.71	84.03	12348.3	78423.6		693718	668570
FALSE	High	Master Protein	TGGT1_283780-t26_1-p1	transcript=TGGT1_283780-t26_1 | gene=TGGT1_283780 | organism=Toxoplasma_gondii_GT1 | gene_product=glucose-6-phosphate isomerase GPI | transcript_product=glucose-6-phosphate isomerase GPI | location=TGGT1_chrV:2809762-2819876(-) | protein_length=661 | sequence_SO=chromosome | SO=protein_coding	0	70.501	24	10	47	10	1	661	74.4	8.46	57.89	10	0.434	0.543	0.0425693	0.152944	0.208887	0.279826	1.24	2.74	0.434	0.415	0.666	0.509	0.543	0.949	-1.2	-1.27	-0.59	-0.98	-0.88	-0.08	471489	204622	5.77739e+06	3.13475e+06	40.64	62.65	45.13	81.85	471489	232559	566732	204622	96448.7
FALSE	High	Master Protein	TGGT1_315770-t26_1-p1	transcript=TGGT1_315770-t26_1 | gene=TGGT1_315770 | organism=Toxoplasma_gondii_GT1 | gene_product=cytochrome p450 superfamily protein | transcript_product=cytochrome p450 superfamily protein | location=TGGT1_chrXI:4913385-4919784(-) | protein_length=553 | sequence_SO=chromosome | SO=protein_coding	0	70.448	28	13	70	13	1	553	62.6	7.97	59.15	13	0.596	0.859	0.63004	0.589698	0.694747	0.670186	9.08	0.68	0.596	1.748	0.493	1.138	0.854	0.859	-0.75	0.81	-1.02	0.19	-0.23	-0.22	123305	215591	5.04884e+06	4.3105e+06	94.74	68.75	42.25	31.89	500774	123305	94152.7	298414	215591
FALSE	High	Master Protein	TGGT1_233100-t26_1-p1	transcript=TGGT1_233100-t26_1 | gene=TGGT1_233100 | organism=Toxoplasma_gondii_GT1 | gene_product=SPFH domain / Band 7 family protein | transcript_product=SPFH domain / Band 7 family protein | location=TGGT1_chrVIII:2412652-2416916(-) | protein_length=290 | sequence_SO=chromosome | SO=protein_coding	0	70.269	45	10	50	10	1	290	32	9.33	55.27	10	1.58	0.858	0.137378	0.119425	0.282094	0.243766	35.27	7.98	1.204	1.58	2.533	0.858	0.921	0.725	0.27	0.66	1.34	-0.22	-0.12	-0.46	51964.6	116569	3.11236e+06	2.86527e+06	84.63	53.57	80.12	67.68	189209	51964.6	46011.7	227802	82094
FALSE	High	Master Protein	TGGT1_314810-t26_1-p1	transcript=TGGT1_314810-t26_1 | gene=TGGT1_314810 | organism=Toxoplasma_gondii_GT1 | gene_product=ribosomal protein RPL7 | transcript_product=ribosomal protein RPL7 | location=TGGT1_chrXI:4256933-4260657(+) | protein_length=258 | sequence_SO=chromosome | SO=protein_coding	0	70.25	38	8	88	8	1	258	30.1	10.36	86.41	8	0.504	0.667					21.34	2.31	0.504	0.789	0.01	0.667	0.708	0.643	-0.99	-0.34	-6.64	-0.58	-0.5	-0.64	466671	396262	9.20658e+06	6.51576e+06	48.46	67.81	78.43	74.43	466671	846222	333675	235043	668064
FALSE	High	Master Protein	TGGT1_288720-t26_1-p1	transcript=TGGT1_288720-t26_1 | gene=TGGT1_288720 | organism=Toxoplasma_gondii_GT1 | gene_product=ribosomal protein RPL10 | transcript_product=ribosomal protein RPL10 | location=TGGT1_chrIX:2518172-2520490(-) | protein_length=221 | sequence_SO=chromosome | SO=protein_coding	0	70.049	49	10	99	10	1	221	24.8	10.18	158.48	10	0.763	0.824	0.0666043	0.241976	0.232613	0.369762	7.88	20.91	0.832	0.628	0.763	0.995	0.824	0.621	-0.26	-0.67	-0.39	-0.01	-0.28	-0.69	270221	206055	7.55991e+06	6.22668e+06	52.3	63.77	61.55	37.13	524242	195030	270221	436275	122386
FALSE	High	Master Protein	TGGT1_311430-t26_1-p1	transcript=TGGT1_311430-t26_1 | gene=TGGT1_311430 | organism=Toxoplasma_gondii_GT1 | gene_product=fibrillarin | transcript_product=fibrillarin | location=TGGT1_chrXI:2031325-2032910(-) | protein_length=303 | sequence_SO=chromosome | SO=protein_coding	0	70.022	47	10	57	10	1	303	31.9	10.29	55.57	10	100	0.933					0	10.89	14.605	100	100	0.933	1.011	0.701	3.87	6.64	6.64	-0.1	0.02	-0.51	11403	166536	2.91502e+06	2.94838e+06		26.04	96.18	77.68	11403			166536	123693
FALSE	High	Master Protein	TGGT1_247470-t26_1-p1	transcript=TGGT1_247470-t26_1 | gene=TGGT1_247470 | organism=Toxoplasma_gondii_GT1 | gene_product=putative nucleolar protein | transcript_product=putative nucleolar protein | location=TGGT1_chrXII:3291010-3295334(+) | protein_length=536 | sequence_SO=chromosome | SO=protein_coding	0	69.889	40	15	43	15	1	536	59.9	8.15	52.43	15	0.462	0.877					17.15	5.76	0.712	0.462	0.01	0.921	0.771	0.877	-0.49	-1.11	-6.64	-0.12	-0.38	-0.19	154866	104341	3.08241e+06	2.37686e+06	48.52	50.9	40.09	41.17	213465	154866	71802.1	152090	71583.6
FALSE	High	Master Protein	TGGT1_258870A-t26_1-p1	transcript=TGGT1_258870A-t26_1 | gene=TGGT1_258870A | organism=Toxoplasma_gondii_GT1 | gene_product=hypothetical protein | transcript_product=hypothetical protein | location=TGGT1_chrVIIb:3082018-3084228(-) | protein_length=557 | sequence_SO=chromosome | SO=protein_coding	0	69.733	23	10	50	6	1	557	60.6	5.07	51.81	10	6.227	0.722					126.06	1.5	0.932	6.227	100	0.708	0.931	0.722	-0.1	2.64	6.64	-0.5	-0.1	-0.47	55110.4	117840	1.42867e+06	1.14813e+06	96.24	48.75	81.43	74.41	126403	24027.5		117840	149615
FALSE	High	Master Protein	TGGT1_212290-t26_1-p1	transcript=TGGT1_212290-t26_1 | gene=TGGT1_212290 | organism=Toxoplasma_gondii_GT1 | gene_product=ribosomal protein RPS19 | transcript_product=ribosomal protein RPS19 | location=TGGT1_chrX:3845925-3847625(-) | protein_length=313 | sequence_SO=chromosome | SO=protein_coding	0	69.392	24	7	90	7	1	313	34.9	8.68	104.22	7	0.847	0.886	0.358841	0.293108	0.476896	0.419526	3.29	0.09	0.071	0.873	0.847	0.887	0.886	0.369	-3.82	-0.2	-0.24	-0.17	-0.17	-1.44	465354	195375	8.8056e+06	7.80071e+06	37.74	87.16	84.68	33.78	517163	465354	230752	36588.5	406194
FALSE	High	Master Protein	TGGT1_251810-t26_1-p1	transcript=TGGT1_251810-t26_1 | gene=TGGT1_251810 | organism=Toxoplasma_gondii_GT1 | gene_product=putative translation initiation factor eIF-5A | transcript_product=putative translation initiation factor eIF-5A | location=TGGT1_chrXII:5518720-5519205(-) | protein_length=161 | sequence_SO=chromosome | SO=protein_coding	0	69.216	44	7	216	7	1	161	17.5	5.39	331.87	7	1.085	0.818	0.961246	0.0289457	0.970763	0.161762	4.48	0.23	1.118	1.085	0.837	0.818	0.816	0.894	0.16	0.12	-0.26	-0.29	-0.29	-0.16	4.80664e+06	5.21504e+06	1.72401e+07	1.40998e+07	34.46	17.61	58.3	64.03	4.04797e+06	4.80664e+06	7.64269e+06	4.52464e+06	5.21504e+06
FALSE	High	Master Protein	TGGT1_321680-t26_1-p1	transcript=TGGT1_321680-t26_1 | gene=TGGT1_321680 | organism=Toxoplasma_gondii_GT1 | gene_product=hypothetical protein | transcript_product=hypothetical protein | location=TGGT1_chrIb:1645852-1649258(-) | protein_length=372 | sequence_SO=chromosome | SO=protein_coding	0	69	33	11	87	11	1	372	40.7	6.16	84.9	11	0.292	0.626	0.181016	0.0661888	0.315004	0.184966	0.08	9.48	0.291	0.992	0.292	0.626	0.796	0.524	-1.78	-0.01	-1.77	-0.68	-0.33	-0.93	1.40951e+06	410231	5.74825e+06	4.57584e+06	61.24	16.68	72.86	55.56	1.41166e+06	305158	1.40951e+06	410231	302865
FALSE	High	Master Protein	TGGT1_263700-t26_1-p1	transcript=TGGT1_263700-t26_1 | gene=TGGT1_263700 | organism=Toxoplasma_gondii_GT1 | gene_product=ribosomal protein RPS14 | transcript_product=ribosomal protein RPS14 | location=TGGT1_chrVIIb:359504-361231(+) | protein_length=156 | sequence_SO=chromosome | SO=protein_coding	0	68.874	49	7	111	7	1	156	16.3	10.36	237.16	7	0.579	0.721	0.0094162	0.0435242	0.111942	0.166604	1.82	8.4	0.659	0.579	0.558	0.642	0.818	0.721	-0.6	-0.79	-0.84	-0.64	-0.29	-0.47	1.77728e+06	991402	1.06095e+07	8.6775e+06	37.6	42.06	41.61	41.94	1.91622e+06	864570	1.77728e+06	1.26242e+06	500615
FALSE	High	Master Protein	TGGT1_290160-t26_1-p1	transcript=TGGT1_290160-t26_1 | gene=TGGT1_290160 | organism=Toxoplasma_gondii_GT1 | gene_product=putative sortilin | transcript_product=putative sortilin | location=TGGT1_chrIX:3410442-3420211(-) | protein_length=1033 | sequence_SO=chromosome | SO=protein_coding	0	68.808	18	13	36	13	1	1033	113.5	6.67	41.35	13	3.399	0.827					102.48	6.8	1.05	3.399	100	0.771	1.945	0.827	0.07	1.77	6.64	-0.37	0.96	-0.27	118299	240785	2.03396e+06	3.95558e+06	66.78	19.51	89.98	66.33	197571	70834.2		207376	240785
FALSE	High	Master Protein	TGGT1_305520-t26_1-p1	transcript=TGGT1_305520-t26_1 | gene=TGGT1_305520 | organism=Toxoplasma_gondii_GT1 | gene_product=ribosomal protein RPS2 | transcript_product=ribosomal protein RPS2 | location=TGGT1_chrIX:5229307-5231745(+) | protein_length=269 | sequence_SO=chromosome | SO=protein_coding	0	68.772	45	11	90	11	1	269	29.3	10.2	105.84	11	0.786	0.921	0.248537	0.0821455	0.379787	0.202256	15.47	4.75	0.786	1.029	0.654	0.964	0.921	0.886	-0.35	0.04	-0.61	-0.05	-0.12	-0.17	392730	314651	10532400	9.69918e+06	75.78	73.26	45.2	41.19	1.15786e+06	305737	392730	910454	314651
FALSE	High	Master Protein	TGGT1_305850-t26_1-p1	transcript=TGGT1_305850-t26_1 | gene=TGGT1_305850 | organism=Toxoplasma_gondii_GT1 | gene_product=RNA recognition motif-containing protein | transcript_product=RNA recognition motif-containing protein | location=TGGT1_chrIX:5399604-5403723(-) | protein_length=372 | sequence_SO=chromosome | SO=protein_coding	0	68.688	51	13	69	13	1	372	39.1	9.63	75.57	13	0.205	0.616					5.91	2.34	0.556	0.205	0.01	0.642	0.616	0.553	-0.85	-2.29	-6.64	-0.64	-0.7	-0.86	66994.2	36002.9	3.50311e+06	2.15861e+06	66.14	105.59	86.75	79.23	169903	66994.2	52869.3	94528.3	13712.4
FALSE	High	Master Protein	TGGT1_222220-t26_1-p1	transcript=TGGT1_222220-t26_1 | gene=TGGT1_222220 | organism=Toxoplasma_gondii_GT1 | gene_product=alveolin domain containing intermediate filament IMC7 | transcript_product=alveolin domain containing intermediate filament IMC7 | location=TGGT1_chrII:949239-952716(+) | protein_length=429 | sequence_SO=chromosome | SO=protein_coding	0	68.652	44	12	56	12	1	429	46.8	5.1	54.93	12	0.982	0.922	0.832602	0.356707	0.868803	0.481908	36.52	3.36	0.982	1.246	0.731	0.922	0.947	0.316	-0.03	0.32	-0.45	-0.12	-0.08	-1.66	991958	984397	2.57425e+06	2.43678e+06	25.4	2.6	101.44	35.98	991958	821458	1.34573e+06	974372	1.02324e+06
FALSE	High	Master Protein	TGGT1_262050-t26_1-p1	transcript=TGGT1_262050-t26_1 | gene=TGGT1_262050 | organism=Toxoplasma_gondii_GT1 | gene_product=rhoptry kinase family protein ROP39 | transcript_product=rhoptry kinase family protein ROP39 | location=TGGT1_chrVIIb:1382528-1384294(+) | protein_length=588 | sequence_SO=chromosome | SO=protein_coding	0	68.113	26	12	64	12	1	588	65.1	8.76	60.28	12	0.498	0.626	0.136767	0.00303799	0.282094	0.141622	14.18	1.38	0.498	0.306	0.824	0.611	0.626	0.665	-1.01	-1.71	-0.28	-0.71	-0.68	-0.59	285177	177654	4.84163e+06	3.02957e+06	18.54	39.32	42.09	45.95	356792	285177	248590	177654	87231.5
FALSE	High	Master Protein	TGGT1_218780-t26_1-p1	transcript=TGGT1_218780-t26_1 | gene=TGGT1_218780 | organism=Toxoplasma_gondii_GT1 | gene_product=putative phosphoserine aminotransferase | transcript_product=putative phosphoserine aminotransferase | location=TGGT1_chrXII:1247991-1254054(-) | protein_length=481 | sequence_SO=chromosome | SO=protein_coding	0	67.47	31	9	87	9	1	481	52.8	5.36	135.3	9	2.013	0.757	0.117468	0.182352	0.275441	0.304599	57.32	19.88	2.013	2.914	1.235	0.757	0.955	0.579	1.01	1.54	0.3	-0.4	-0.07	-0.79	308655	417059	4.63462e+06	4.42742e+06	39.3	31.74	78.64	55.06	330601	143111	308655	665527	417059
FALSE	High	Master Protein	TGGT1_232440-t26_1-p1	transcript=TGGT1_232440-t26_1 | gene=TGGT1_232440 | organism=Toxoplasma_gondii_GT1 | gene_product=Brf1p family coiled coil protein | transcript_product=Brf1p family coiled coil protein | location=TGGT1_chrVIII:2091405-2096025(+) | protein_length=468 | sequence_SO=chromosome | SO=protein_coding	0	67.43	29	14	102	14	1	468	54	6.62	73.28	14	0.164	0.539	0.00978581	0.0477762	0.111942	0.166604	0.41	1.87	0.164	0.146	0.255	0.751	0.539	0.516	-2.61	-2.77	-1.97	-0.41	-0.89	-0.96	727329	126269	5.56695e+06	3.33122e+06	36.25	24.23	69.86	56.65	1.04017e+06	727329	495285	170125	106541
FALSE	High	Master Protein	TGGT1_314400-t26_1-p1	transcript=TGGT1_314400-t26_1 | gene=TGGT1_314400 | organism=Toxoplasma_gondii_GT1 | gene_product=putative pyruvate dehydrogenase E1 component, beta subunit | transcript_product=putative pyruvate dehydrogenase E1 component, beta subunit | location=TGGT1_chrXI:4024213-4027840(+) | protein_length=423 | sequence_SO=chromosome | SO=protein_coding	0	67.251	15	5	148	5	1	423	45.6	7.2	172.88	5	0.851	0.78	0.208753	0.147146	0.336976	0.271654	13.08	3.17	0.851	0.955	0.639	0.752	0.974	0.78	-0.23	-0.07	-0.65	-0.41	-0.04	-0.36	2.75083e+06	2.53479e+06	2.43505e+06	2.20012e+06	84.75	63.69	54.03	48.15	2.75083e+06	2.65533e+06	1.04711e+07	2.34076e+06	2.53479e+06
FALSE	High	Master Protein	TGGT1_312110-t26_1-p1	transcript=TGGT1_312110-t26_1 | gene=TGGT1_312110 | organism=Toxoplasma_gondii_GT1 | gene_product=apicoplast-associated thioredoxin family protein Atrx1 | transcript_product=apicoplast-associated thioredoxin family protein Atrx1 | location=TGGT1_chrXI:2396639-2404968(-) | protein_length=790 | sequence_SO=chromosome | SO=protein_coding	0	67.214	21	11	43	11	1	790	86.9	7.81	73.09	11	0.294	0.859					6.27	24.47	0.438	0.294	0.01	0.859	1.248	0.666	-1.19	-1.77	-6.64	-0.22	0.32	-0.59	50738.7	25246	1.52526e+06	1.9034e+06	72.81	68.38	113.79	90.26	97751	50738.7	17552	42786.1	14896.5
FALSE	High	Master Protein	TGGT1_204530-t26_1-p1	transcript=TGGT1_204530-t26_1 | gene=TGGT1_204530 | organism=Toxoplasma_gondii_GT1 | gene_product=microneme protein MIC11 | transcript_product=microneme protein MIC11 | location=TGGT1_chrVIIa:1632334-1633282(-) | protein_length=204 | sequence_SO=chromosome | SO=protein_coding	0	67.171	33	7	112	7	1	204	22.4	5.19	130.49	7	0.605	0.73	0.10093	0.316003	0.269679	0.435823	7.3	0.78	0.687	0.327	0.605	0.73	0.723	1.097	-0.54	-1.61	-0.72	-0.45	-0.47	0.13	1.09251e+06	661216	1.77612e+07	1.29692e+07	45.99	71.68	48.21	74.31	1.93496e+06	804535	1.09251e+06	1.32849e+06	263147
FALSE	High	Master Protein	TGGT1_215775-t26_1-p1	transcript=TGGT1_215775-t26_1 | gene=TGGT1_215775 | organism=Toxoplasma_gondii_GT1 | gene_product=rhoptry protein ROP8 | transcript_product=rhoptry protein ROP8 | location=TGGT1_chrX:7045451-7047178(+) | protein_length=575 | sequence_SO=chromosome | SO=protein_coding	0	66.96	16	7	73	3	1	575	65.4	9.09	149.97	7	100	0.681					0	67.68	100			0.01	100	0.681	6.64			-6.64	6.64	-0.55		24129	273942	141375			133.1	136.58				24129
FALSE	High	Master Protein	TGGT1_276140-t26_1-p1	transcript=TGGT1_276140-t26_1 | gene=TGGT1_276140 | organism=Toxoplasma_gondii_GT1 | gene_product=ADP ribosylation factor ARF1 | transcript_product=ADP ribosylation factor ARF1 | location=TGGT1_chrIII:108590-111506(-) | protein_length=551 | sequence_SO=chromosome | SO=protein_coding	0	66.756	16	7	68	7	1	551	61.7	9.89	90.52	7	0.363	0.612	0.0470241	0.22883	0.213176	0.360474	0.34	4.84	0.363	0.153	0.37	0.559	0.612	1.055	-1.46	-2.71	-1.44	-0.84	-0.71	0.08	437644	161823	8.40778e+06	5.14703e+06	27.32	57.44	30.97	68.44	653955	402738	437644	237685	61660.3
FALSE	High	Master Protein	TGGT1_217740-t26_1-p1	transcript=TGGT1_217740-t26_1 | gene=TGGT1_217740 | organism=Toxoplasma_gondii_GT1 | gene_product=3-ketoacyl-(acyl-carrier-protein) reductase | transcript_product=3-ketoacyl-(acyl-carrier-protein) reductase | location=TGGT1_chrXII:2024723-2028460(+) | protein_length=376 | sequence_SO=chromosome | SO=protein_coding	0	66.539	36	10	44	10	1	376	39	9.23	70.29	10	1.009	0.615					146.79	8.43	1.009	2.22	0.01	0.523	0.749	0.615	0.01	1.15	-6.64	-0.94	-0.42	-0.7	44585.4	148610	3.45353e+06	2.24529e+06	119.38	54.48	54.92	53.91	221024	44585.4	14646.4	223077	99000.8
FALSE	High	Master Protein	TGGT1_242290-t26_1-p1	transcript=TGGT1_242290-t26_1 | gene=TGGT1_242290 | organism=Toxoplasma_gondii_GT1 | gene_product=putative proteasome subunit alpha1 | transcript_product=putative proteasome subunit alpha1 | location=TGGT1_chrVI:1851868-1857165(+) | protein_length=253 | sequence_SO=chromosome | SO=protein_coding	0	66.372	44	10	38	10	1	253	28.1	6.62	36.97	10	2.448	0.406	0.370307	0.0459415	0.485804	0.166604	109.68	1.79	2.448	0.637	6.404	0.406	0.65	0.376	1.29	-0.65	2.68	-1.3	-0.62	-1.41	229710	654660	3.75468e+06	2.44047e+06	63.66	72.49	71.51	54.05	418889	229710	102228	1.02554e+06	146359
FALSE	High	Master Protein	TGGT1_310790-t26_1-p1	transcript=TGGT1_310790-t26_1 | gene=TGGT1_310790 | organism=Toxoplasma_gondii_GT1 | gene_product=hypothetical protein | transcript_product=hypothetical protein | location=TGGT1_chrXI:1556574-1558606(+) | protein_length=219 | sequence_SO=chromosome | SO=protein_coding	0	66.371	45	7	55	7	1	219	24.7	4.92	79.15	7	0.11	0.561	0.0574275	0.0498051	0.230857	0.169203	0.69	4.5	0.068	0.11	0.358	0.561	0.754	0.507	-3.89	-3.18	-1.48	-0.83	-0.41	-0.98	928886	142602	4.87602e+06	3.67525e+06	55.29	56.84	67.76	52.18	2.10893e+06	928886	827548	142602	102144
FALSE	High	Master Protein	TGGT1_223590-t26_1-p1	transcript=TGGT1_223590-t26_1 | gene=TGGT1_223590 | organism=Toxoplasma_gondii_GT1 | gene_product=proteasome subunit | transcript_product=proteasome subunit | location=TGGT1_chrX:3626728-3628061(-) | protein_length=369 | sequence_SO=chromosome | SO=protein_coding	0	66.37	28	8	69	8	1	369	39.2	8.59	105.72	8	3.36	0.642	0.098416	0.0191864	0.269679	0.149741	62.75	1.3	1.443	3.36	4.782	0.656	0.642	0.525	0.53	1.75	2.26	-0.61	-0.64	-0.93	162023	544397	4.71366e+06	3.02586e+06	108	55.43	53.38	39.78	637128	162023	58244.9	919267	544397
FALSE	High	Master Protein	TGGT1_208370-t26_1-p1	transcript=TGGT1_208370-t26_1 | gene=TGGT1_208370 | organism=Toxoplasma_gondii_GT1 | gene_product=putative myosin heavy chain | transcript_product=putative myosin heavy chain | location=TGGT1_chrIb:652389-657163(+) | protein_length=1124 | sequence_SO=chromosome | SO=protein_coding	0	66.087	18	13	22	13	1	1124	124.7	6.29	26.78	13	1.196	0.979	0.349573	0.917222	0.468011	0.937911	17.81	12.79	5.649	1.196	1.053	1.181	0.891	0.979	2.5	0.26	0.07	0.24	-0.17	-0.03	83867.5	121156	406652	362276	100.31	55.61	114.01	112.25	21447.8	83867.5	253011	121156	100327
FALSE	High	Master Protein	TGGT1_214940-t26_1-p1	transcript=TGGT1_214940-t26_1 | gene=TGGT1_214940 | organism=Toxoplasma_gondii_GT1 | gene_product=MIC2-associated protein M2AP | transcript_product=MIC2-associated protein M2AP | location=TGGT1_chrX:6494811-6496996(+) | protein_length=330 | sequence_SO=chromosome | SO=protein_coding	0	65.644	32	8	98	8	1	330	34.6	4.39	127.86	8	1.022	0.87	0.666046	0.0929116	0.728544	0.210305	0.21	0.31	1.023	0.895	1.022	0.964	0.868	0.87	0.03	-0.16	0.03	-0.05	-0.2	-0.2	1.2858e+06	1.31372e+06	6.52893e+06	5.66775e+06	27.19	19.1	57.14	53.9	1.12333e+06	1.85982e+06	1.2858e+06	1.14939e+06	1.66388e+06
FALSE	High	Master Protein	TGGT1_220270-t26_1-p1	transcript=TGGT1_220270-t26_1 | gene=TGGT1_220270 | organism=Toxoplasma_gondii_GT1 | gene_product=alveolin domain containing intermediate filament IMC6 | transcript_product=alveolin domain containing intermediate filament IMC6 | location=TGGT1_chrV:152699-154033(-) | protein_length=444 | sequence_SO=chromosome | SO=protein_coding	0	65.592	31	10	61	10	1	444	48.6	5.1	76.42	10	0.363	0.752	0.199191	0.164808	0.331714	0.285347	14.9	9.18	0.795	0.363	0.086	0.752	0.834	0.436	-0.33	-1.46	-3.54	-0.41	-0.26	-1.2	182297	66121.7	3.22565e+06	2.69153e+06	64.15	48.36	56.63	22.93	128384	182297	423037	102069	66121.7
FALSE	High	Master Protein	TGGT1_234505-t26_1-p1	transcript=TGGT1_234505-t26_1 | gene=TGGT1_234505 | organism=Toxoplasma_gondii_GT1 | gene_product=putative phenylalanyl-tRNA synthetase alpha chain A | transcript_product=putative phenylalanyl-tRNA synthetase alpha chain A | location=TGGT1_chrX:4319172-4323950(+) | protein_length=525 | sequence_SO=chromosome | SO=protein_coding	0	65.35	33	11	19	11	1	525	59.3	7.4	33.01	11	0.113	0.327					0	13.97	0.113			0.013	0.615	0.327	-3.14			-6.29	-0.7	-1.61	83573	9467.35	840324	516882			99.45	103.19	83573			9467.35
FALSE	High	Master Protein	TGGT1_232340-t26_1-p1	transcript=TGGT1_232340-t26_1 | gene=TGGT1_232340 | organism=Toxoplasma_gondii_GT1 | gene_product=protein phosphatase 2C domain-containing protein | transcript_product=protein phosphatase 2C domain-containing protein | location=TGGT1_chrVIII:2014510-2019343(-) | protein_length=547 | sequence_SO=chromosome | SO=protein_coding	0	65.316	24	12	75	12	1	547	60	4.65	68.89	12	0.618	0.79	0.450925	0.114508	0.548986	0.237154	44.18	8.23	0.618	1.606	0.136	0.86	0.79	0.594	-0.69	0.68	-2.88	-0.22	-0.34	-0.75	164959	68508.8	4.31906e+06	3.41294e+06	75.75	90.89	59.38	39.89	297877	42659.6	164959	184052	68508.8
FALSE	High	Master Protein	TGGT1_308840-t26_1-p1	transcript=TGGT1_308840-t26_1 | gene=TGGT1_308840 | organism=Toxoplasma_gondii_GT1 | gene_product=SAG-related sequence SRS51 | transcript_product=SAG-related sequence SRS51 | location=TGGT1_chrXI:258885-259967(+) | protein_length=360 | sequence_SO=chromosome | SO=protein_coding	0	65.214	21	6	84	6	1	360	38	6.2	101.9	6	0.738	0.708	0.337421	0.160365	0.459355	0.285347	38.27	3.32	0.738	0.315	1.088	0.677	0.977	0.708	-0.44	-1.67	0.12	-0.56	-0.03	-0.5	329276	208587	6.83183e+06	6.67624e+06	8.86	57.74	80.97	72.2	282505	329276	332179	208587	103578
FALSE	High	Master Protein	TGGT1_215430-t26_1-p1	transcript=TGGT1_215430-t26_1 | gene=TGGT1_215430 | organism=Toxoplasma_gondii_GT1 | gene_product=hypothetical protein | transcript_product=hypothetical protein | location=TGGT1_chrX:6843523-6847906(-) | protein_length=244 | sequence_SO=chromosome | SO=protein_coding	0	64.867	48	9	78	9	1	244	27.5	5.54	89.99	9	2.555	1.046	0.0549843	0.718037	0.230857	0.779147	7.58	26.56	1.486	2.686	2.555	1.046	1.234	0.584	0.57	1.43	1.35	0.07	0.3	-0.78	46052.5	123682	2.63766e+06	2.75947e+06	96.9	64.53	108.72	71.85	175952	46052.5	27945.6	261538	123682
FALSE	High	Master Protein	TGGT1_206610-t26_1-p1	transcript=TGGT1_206610-t26_1 | gene=TGGT1_206610 | organism=Toxoplasma_gondii_GT1 | gene_product=pyruvate dehydrogenase complex subunit PDH-E2 | transcript_product=pyruvate dehydrogenase complex subunit PDH-E2 | location=TGGT1_chrVIIa:755999-763930(-) | protein_length=929 | sequence_SO=chromosome | SO=protein_coding	0	64.73	22	10	27	10	1	929	96.8	6.38	36.55	10	0.01	0.846					0	9.06	0.01			0.649	0.918	0.846	-6.64			-0.62	-0.12	-0.24	21358.5		901641	700722			94.36	99.27	21358.5
FALSE	High	Master Protein	TGGT1_243950-t26_1-p1	transcript=TGGT1_243950-t26_1 | gene=TGGT1_243950 | organism=Toxoplasma_gondii_GT1 | gene_product=putative prohibitin | transcript_product=putative prohibitin | location=TGGT1_chrVI:2820162-2822544(+) | protein_length=271 | sequence_SO=chromosome | SO=protein_coding	0	64.642	39	8	61	8	1	271	30.2	8.1	72.64	8	0.649	0.639	0.263636	0.0171431	0.391485	0.149741	27.69	5.62	1.04	0.649	0.361	0.711	0.639	0.579	0.06	-0.62	-1.47	-0.49	-0.65	-0.79	160905	104365	3.491e+06	2.22961e+06	55.44	86.98	81.64	72.61	209333	160905	55471.9	217617	104365
FALSE	High	Master Protein	TGGT1_269950-t26_1-p1	transcript=TGGT1_269950-t26_1 | gene=TGGT1_269950 | organism=Toxoplasma_gondii_GT1 | gene_product=hypothetical protein | transcript_product=hypothetical protein | location=TGGT1_chrVIII:5501073-5504592(-) | protein_length=944 | sequence_SO=chromosome | SO=protein_coding	0	64.569	15	10	39	10	1	944	104.6	5.73	32.9	10	0.022	1.086	0.0122477	0.859898	0.116211	0.888198	0.04	25.33	0.039	0.022	0.01	0.788	1.272	1.086	-4.66	-5.49	-6.64	-0.34	0.35	0.12	2.33832e+06	52009.3	1.32221e+06	1.36818e+06	48.58	39.86	42.08	47.44	2.28805e+06	2.33832e+06	5017478	90281.8	52009.3
FALSE	High	Master Protein	TGGT1_230160-t26_1-p1	transcript=TGGT1_230160-t26_1 | gene=TGGT1_230160 | organism=Toxoplasma_gondii_GT1 | gene_product=hypothetical protein | transcript_product=hypothetical protein | location=TGGT1_chrVIII:647435-648305(-) | protein_length=142 | sequence_SO=chromosome | SO=protein_coding	0	64.506	66	8	104	8	1	142	15.8	6.18	207.75	8	1.003	0.771	0.50021	0.182777	0.585875	0.304599	13.16	19.29	1.984	0.914	1.003	0.94	0.771	0.564	0.99	-0.13	0	-0.09	-0.37	-0.83	706982	1.17532e+06	1.08189e+07	7.98667e+06	43.19	26.41	32.5	10.83	592400	1.28703e+06	706982	1.17532e+06	1.17631e+06
FALSE	High	Master Protein	TGGT1_310010-t26_1-p1	transcript=TGGT1_310010-t26_1 | gene=TGGT1_310010 | organism=Toxoplasma_gondii_GT1 | gene_product=rhoptry neck protein RON1 | transcript_product=rhoptry neck protein RON1 | location=TGGT1_chrXI:969238-974493(+) | protein_length=1158 | sequence_SO=chromosome | SO=protein_coding	0	64.262	10	8	24	8	1	1158	127.5	4.98	40.26	8	0.091	0.717					0.26	12.25	0.112	0.073		0.717	1.022	0.601	-3.15	-3.78		-0.48	0.03	-0.73	86963.8	7873.82	1.02184e+06	1.04445e+06	15.82	14.63	103.13	82.76	77723.5	97302.6		8735.07	7097.49
FALSE	High	Master Protein	TGGT1_310780-t26_1-p1	transcript=TGGT1_310780-t26_1 | gene=TGGT1_310780 | organism=Toxoplasma_gondii_GT1 | gene_product=dense granule protein GRA4 | transcript_product=dense granule protein GRA4 | location=TGGT1_chrXI:1552761-1553798(-) | protein_length=345 | sequence_SO=chromosome | SO=protein_coding	0	64.152	43	5	56	5	1	345	36.3	7.56	80.22	5	0.837	0.884	0.398342	0.20613	0.506304	0.336404	8.65	3.3	0.767	1.101	0.837	0.858	0.884	1.006	-0.38	0.14	-0.26	-0.22	-0.18	0.01	567152	463274	3.76351e+06	3.28744e+06	10.98	22.71	32.96	42.31	604159	567152	485609	463274	624250
FALSE	High	Master Protein	TGGT1_204020-t26_1-p1	transcript=TGGT1_204020-t26_1 | gene=TGGT1_204020 | organism=Toxoplasma_gondii_GT1 | gene_product=ribosomal protein RPL8 | transcript_product=ribosomal protein RPL8 | location=TGGT1_chrVIIa:1947745-1950214(+) | protein_length=260 | sequence_SO=chromosome | SO=protein_coding	0	63.846	28	6	124	6	1	260	28.2	10.87	197.11	6	0.861	0.84	0.0756538	0.384281	0.239277	0.505763	7.78	6.92	0.922	0.861	0.787	0.784	1.089	0.84	-0.12	-0.22	-0.35	-0.35	0.12	-0.25	747210	633914	14315467	1.55962e+07	38.07	45.47	39.97	37.55	1.36869e+06	736371	747210	1.26164e+06	633914
FALSE	High	Master Protein	TGGT1_236650-t26_1-p1	transcript=TGGT1_236650-t26_1 | gene=TGGT1_236650 | organism=Toxoplasma_gondii_GT1 | gene_product=DEAD (Asp-Glu-Ala-Asp) box polypeptide 17 | transcript_product=DEAD (Asp-Glu-Ala-Asp) box polypeptide 17 | location=TGGT1_chrX:5362273-5365892(-) | protein_length=550 | sequence_SO=chromosome | SO=protein_coding	0	63.557	29	14	38	14	1	550	59.9	8.94	37.64	14	1.739	0.379					16.88	3.51	1.541	1.739	100	0.442	0.379	0.175	0.62	0.8	6.64	-1.18	-1.4	-2.51	155645	274609	5.80608e+06	1831202	2.03	29.48	75.15	50.56	153429	157893		236458	274609
FALSE	High	Master Protein	TGGT1_297470-t26_1-p1	transcript=TGGT1_297470-t26_1 | gene=TGGT1_297470 | organism=Toxoplasma_gondii_GT1 | gene_product=putative myosin light chain 2 | transcript_product=putative myosin light chain 2 | location=TGGT1_chrII:1781267-1787079(+) | protein_length=367 | sequence_SO=chromosome | SO=protein_coding	0	63.264	39	11	44	11	1	367	40.5	5.54	32.6	11	4.063	0.754	0.121264	0.00776188	0.275847	0.149741	63.65	0.37	4.063	2.319	22.763	0.757	0.696	0.754	2.02	1.21	4.51	-0.4	-0.52	-0.41	177535	721276	2.0768e+06	1.44627e+06	69.85	34.72	81.19	83.53	177535	305628	55027.9	721276	708649
FALSE	High	Master Protein	TGGT1_294350-t26_1-p1	transcript=TGGT1_294350-t26_1 | gene=TGGT1_294350 | organism=Toxoplasma_gondii_GT1 | gene_product=DEAD/DEAH box helicase domain-containing protein | transcript_product=DEAD/DEAH box helicase domain-containing protein | location=TGGT1_chrIa:802644-825713(-) | protein_length=2434 | sequence_SO=chromosome | SO=protein_coding	0	63.203	9	13	21	13	1	2434	273.6	6	32.65	13	0.052	0.891					0.99	32.09		0.268	0.01	1.134	0.891	0.434		-1.9	-6.64	0.18	-0.17	-1.2	106429	10271.1	582804	580538	108.97		117.46	72.63		38313.4	295644		10271.1
FALSE	High	Master Protein	TGGT1_202370-t26_1-p1	transcript=TGGT1_202370-t26_1 | gene=TGGT1_202370 | organism=Toxoplasma_gondii_GT1 | gene_product=putative T-complex protein 1, epsilon subunit (TCP-1-epsilon) | transcript_product=putative T-complex protein 1, epsilon subunit (TCP-1-epsilon) | location=TGGT1_chrVIIa:3284056-3290078(+) | protein_length=536 | sequence_SO=chromosome | SO=protein_coding	0	63.069	26	11	41	11	1	536	58.6	5.96	54.17	11	0.257	0.429	0.0749096	0.0156948	0.239277	0.149741	6.2	4.8	0.426	0.257	0.095	0.504	0.345	0.429	-1.23	-1.96	-3.4	-0.99	-1.53	-1.22	371235	71088.7	4.58929e+06	1.58476e+06	75.91	74.04	66.87	68.72	371235	124989	751806	158098	32134.1
FALSE	High	Master Protein	TGGT1_279420-t26_1-p1	transcript=TGGT1_279420-t26_1 | gene=TGGT1_279420 | organism=Toxoplasma_gondii_GT1 | gene_product=hypothetical protein | transcript_product=hypothetical protein | location=TGGT1_chrIX:26421-30410(+) | protein_length=1329 | sequence_SO=chromosome | SO=protein_coding	0	62.96	18	14	31	14	1	1329	144.9	5.2	44	14	0.486	0.853	0.0588326	0.313382	0.232613	0.434955	6.93	7.21	0.582	0.486	0.287	0.91	0.853	0.286	-0.78	-1.04	-1.8	-0.14	-0.23	-1.81	1.06852e+06	609174	793886	677307	60.29	21.48	127.44	70.1	1.04585e+06	1.06852e+06	2.75049e+06	609174	519771
FALSE	High	Master Protein	TGGT1_263070-t26_1-p1	transcript=TGGT1_263070-t26_1 | gene=TGGT1_263070 | organism=Toxoplasma_gondii_GT1 | gene_product=CMGC kinase, CK2 family | transcript_product=CMGC kinase, CK2 family | location=TGGT1_chrVIIb:801033-806072(+) | protein_length=539 | sequence_SO=chromosome | SO=protein_coding	0	62.823	22	9	34	9	1	539	59.8	9.07	43.3	9	0.222	0.7					6.95	7.61	0.912	0.222	0.01	0.926	0.627	0.7	-0.13	-2.17	-6.64	-0.11	-0.67	-0.51	87385.1	49369.6	2.16631e+06	1.35878e+06	64.65	63.02	109.47	106.66	87385.1	138002	28627.8	79724	30572.4
FALSE	High	Master Protein	TGGT1_267400-t26_1-p1	transcript=TGGT1_267400-t26_1 | gene=TGGT1_267400 | organism=Toxoplasma_gondii_GT1 | gene_product=ribosomal protein RPL32 | transcript_product=ribosomal protein RPL32 | location=TGGT1_chrIX:508439-508944(-) | protein_length=134 | sequence_SO=chromosome | SO=protein_coding	0	62.765	49	7	129	7	1	134	15.6	11.03	186.16	7	0.549	0.781	0.00650326	0.0200835	0.0926306	0.149741	2.71	4.35	0.607	0.549	0.516	0.781	0.818	0.72	-0.72	-0.86	-0.95	-0.36	-0.29	-0.47	1.36753e+06	751158	1.6217e+07	1.32681e+07	21.5	27.58	34.63	32.2	1.37306e+06	1.36753e+06	916298	834035	751158
FALSE	High	Master Protein	TGGT1_295350-t26_1-p1	transcript=TGGT1_295350-t26_1 | gene=TGGT1_295350 | organism=Toxoplasma_gondii_GT1 | gene_product=putative nucleoside diphosphate kinase | transcript_product=putative nucleoside diphosphate kinase | location=TGGT1_chrIa:1794066-1795458(-) | protein_length=155 | sequence_SO=chromosome | SO=protein_coding	0	62.721	48	6	117	6	1	155	17.6	6.79	108.82	6	0.76	0.825	0.00184499	0.0477392	0.0684324	0.166604	0.12	0.64	0.76	0.759	0.786	0.83	0.825	0.7	-0.4	-0.4	-0.35	-0.27	-0.28	-0.51	796017	625671	1.11661e+07	9.20662e+06	29.43	28.53	73.72	63.49	1.24688e+06	751391	796017	947953	570482
FALSE	High	Master Protein	TGGT1_221210-t26_1-p1	transcript=TGGT1_221210-t26_1 | gene=TGGT1_221210 | organism=Toxoplasma_gondii_GT1 | gene_product=cyclophilin | transcript_product=cyclophilin | location=TGGT1_chrII:118956-120827(+) | protein_length=179 | sequence_SO=chromosome | SO=protein_coding	0	62.551	62	8	68	7	1	179	19.6	6.54	72.38	8	1.174	0.844	0.767105	0.145089	0.817177	0.270304	33.11	0.1	1.174	1.436	0.728	0.844	0.845	0.577	0.23	0.52	-0.46	-0.24	-0.24	-0.79	172147	202090	3.90517e+06	3.29881e+06	61.19	23.86	107.48	87.22	172147	136357	404084	202090	195821
FALSE	High	Master Protein	TGGT1_313410-t26_1-p1	transcript=TGGT1_313410-t26_1 | gene=TGGT1_313410 | organism=Toxoplasma_gondii_GT1 | gene_product=proteasome 26S regulatory subunit | transcript_product=proteasome 26S regulatory subunit | location=TGGT1_chrXI:3312986-3323185(+) | protein_length=1091 | sequence_SO=chromosome | SO=protein_coding	0	62.434	16	13	32	13	1	1091	117.6	5.1	40.14	13	1.755	0.611					110.4	1.02	0.448	1.755	100	0.611	0.622	0.337	-1.16	0.81	6.64	-0.71	-0.69	-1.57	54434.6	37245.1	1.66672e+06	1.03653e+06	56.47	47.96	97.04	61.65	83082.9	35664.7		37245.1	62606.7
FALSE	High	Master Protein	TGGT1_315490-t26_1-p1	transcript=TGGT1_315490-t26_1 | gene=TGGT1_315490 | organism=Toxoplasma_gondii_GT1 | gene_product=rhoptry protein ROP10 | transcript_product=rhoptry protein ROP10 | location=TGGT1_chrXI:4696632-4698392(-) | protein_length=586 | sequence_SO=chromosome | SO=protein_coding	0	62.145	34	10	57	10	1	586	60.8	4.32	65.47	10	0.371	1.333					19.87	91.83	0.371	1.453	0.01	1.333	2.159	0.484	-1.43	0.54	-6.64	0.42	1.11	-1.05	32183.1	58073.5	1.05793e+06	2.20461e+06	109.31	31.56	126.82	61.03	196365	31859.6	32183.1	72868.7	46282.3
FALSE	High	Master Protein	TGGT1_263520-t26_1-p1	transcript=TGGT1_263520-t26_1 | gene=TGGT1_263520 | organism=Toxoplasma_gondii_GT1 | gene_product=microtubule associated protein SPM1 | transcript_product=microtubule associated protein SPM1 | location=TGGT1_chrVIIb:473105-475119(+) | protein_length=351 | sequence_SO=chromosome | SO=protein_coding	0	62.14	38	9	70	9	1	351	38.7	7.9	72.73	9	0.432	0.58	0.161302	0.426086	0.303692	0.541568	17.32	1.03	0.702	0.432	0.135	0.568	0.58	1.325	-0.51	-1.21	-2.89	-0.82	-0.79	0.41	276120	66908.1	3.0348e+06	2.13504e+06	41.42	100.71	12.29	47.48	378150	154973	276120	265596	66908.1
FALSE	High	Master Protein	TGGT1_215470-t26_1-p1	transcript=TGGT1_215470-t26_1 | gene=TGGT1_215470 | organism=Toxoplasma_gondii_GT1 | gene_product=ribosomal protein RPL10A | transcript_product=ribosomal protein RPL10A | location=TGGT1_chrX:6865357-6867300(+) | protein_length=217 | sequence_SO=chromosome | SO=protein_coding	0	62.138	40	8	95	8	1	217	24.6	9.88	153.25	8	0.525	0.702	0.245952	0.0340461	0.378411	0.162729	8.21	7.86	0.42	1.1	0.525	0.702	0.79	0.627	-1.25	0.14	-0.93	-0.51	-0.34	-0.67	560191	294194	1.10556e+07	8.35958e+06	82.64	47.41	42.11	31.03	1.4749e+06	260940	560191	618986	286933
FALSE	High	Master Protein	TGGT1_224900-t26_1-p1	transcript=TGGT1_224900-t26_1 | gene=TGGT1_224900 | organism=Toxoplasma_gondii_GT1 | gene_product=putative adenylate kinase | transcript_product=putative adenylate kinase | location=TGGT1_chrX:2611933-2614564(+) | protein_length=257 | sequence_SO=chromosome | SO=protein_coding	0	62.056	46	9	66	9	1	257	28.5	8.56	71.26	9	0.575	0.653	0.13745	0.137873	0.282094	0.265711	6.07	14.24	0.575	0.92	0.504	0.653	0.8	0.377	-0.8	-0.12	-0.99	-0.61	-0.32	-1.41	266952	160269	3.0503e+06	2.44101e+06	29.05	2.63	92.83	54.34	266952	174178	319669	153422	160269
FALSE	High	Master Protein	TGGT1_270320-t26_1-p1	transcript=TGGT1_270320-t26_1 | gene=TGGT1_270320 | organism=Toxoplasma_gondii_GT1 | gene_product=protein phosphatase 2C domain-containing protein | transcript_product=protein phosphatase 2C domain-containing protein | location=TGGT1_chrVIII:5274953-5280379(+) | protein_length=538 | sequence_SO=chromosome | SO=protein_coding	0	61.976	19	8	35	8	1	538	58.7	5.08	41.57	8	0.402	1.108	0.342052	0.996966	0.463645	0.996966	20.85	79.47	0.402	0.052	1.381	1.763	1.108	0.514	-1.32	-4.27	0.47	0.82	0.15	-0.96	189687	76216.8	1.89893e+06	2.10428e+06	48.92	74.2	89.75	46.44	189687	239457	77969.7	76216.8	12397.9
FALSE	High	Master Protein	TGGT1_289680-t26_1-p1	transcript=TGGT1_289680-t26_1 | gene=TGGT1_289680 | organism=Toxoplasma_gondii_GT1 | gene_product=Ras-related protein Rab11 | transcript_product=Ras-related protein Rab11 | location=TGGT1_chrIX:3181746-3185073(-) | protein_length=219 | sequence_SO=chromosome | SO=protein_coding	0	61.948	52	11	80	9	1	219	25	7.03	78.97	11	0.7	0.635	0.491961	0.0435731	0.580116	0.166604	34.7	1.43	0.7	0.366	1.445	0.803	0.635	0.619	-0.51	-1.45	0.53	-0.32	-0.66	-0.69	285447	104554	3.38776e+06	2.17833e+06	76.55	79.79	6.29	16.93	462426	285447	54273.7	323894	104554
FALSE	High	Master Protein	TGGT1_318160-t26_1-p1	transcript=TGGT1_318160-t26_1 | gene=TGGT1_318160 | organism=Toxoplasma_gondii_GT1 | gene_product=MSP (Major sperm protein) domain-containing protein | transcript_product=MSP (Major sperm protein) domain-containing protein | location=TGGT1_chrIV:1459846-1460565(+) | protein_length=239 | sequence_SO=chromosome | SO=protein_coding	0	61.744	49	8	44	8	1	239	26	7.55	73.54	8	0.124	0.873	0.0672021	0.789199	0.232613	0.837915	1.39	24.92	0.339	0.048	0.124	0.873	1.389	0.681	-1.56	-4.39	-3.02	-0.2	0.47	-0.55	499719	111279	2.27329e+06	2.02394e+06	36.89	71.77	113.82	90.12	494377	499719	900596	167543	23841.6
FALSE	High	Master Protein	TGGT1_288630-t26_1-p1	transcript=TGGT1_288630-t26_1 | gene=TGGT1_288630 | organism=Toxoplasma_gondii_GT1 | gene_product=putative nucleosome assembly protein (NAP) | transcript_product=putative nucleosome assembly protein (NAP) | location=TGGT1_chrIX:2455396-2456752(+) | protein_length=281 | sequence_SO=chromosome | SO=protein_coding	0	61.652	31	9	57	9	1	281	32.1	4.42	65.71	9	0.934	0.834					48.09	0.36	0.934	0.587	100	0.837	0.834	0.633	-0.1	-0.77	6.64	-0.26	-0.26	-0.66	176741	105035	2.84009e+06	2.36757e+06	1.83	59.66	92.45	76.36	174470	179042		162944	105035
FALSE	High	Master Protein	TGGT1_306960-t26_1-p1	transcript=TGGT1_306960-t26_1 | gene=TGGT1_306960 | organism=Toxoplasma_gondii_GT1 | gene_product=phenylalanine--tRNA ligase, beta subunit protein | transcript_product=phenylalanine--tRNA ligase, beta subunit protein | location=TGGT1_chrXI:126175-136113(-) | protein_length=675 | sequence_SO=chromosome | SO=protein_coding	0	61.531	25	13	25	13	1	675	74.5	5.68	33.98	13		0.59						7.14				0.59	1.019	0.508				-0.76	0.03	-0.98			969267	652510			116.45	96.39
FALSE	High	Master Protein	TGGT1_286120-t26_1-p1	transcript=TGGT1_286120-t26_1 | gene=TGGT1_286120 | organism=Toxoplasma_gondii_GT1 | gene_product=prolyl endopeptidase | transcript_product=prolyl endopeptidase | location=TGGT1_chrV:1831629-1840693(-) | protein_length=825 | sequence_SO=chromosome | SO=protein_coding	0	61.283	21	12	35	12	1	825	93	6.92	47.16	12	0.504	0.702					22.87	1.25	0.504	0.81	0.01	0.702	0.687	0.714	-0.99	-0.3	-6.64	-0.51	-0.54	-0.49	152660	73624.7	2.26931e+06	1.55894e+06	54.94	53.86	79.63	81.31	218336	60870.9	152660	109951	49300.2
FALSE	High	Master Protein	TGGT1_251930-t26_1-p1	transcript=TGGT1_251930-t26_1 | gene=TGGT1_251930 | organism=Toxoplasma_gondii_GT1 | gene_product=enoyl-acyl carrier reductase ENR | transcript_product=enoyl-acyl carrier reductase ENR | location=TGGT1_chrXII:5592481-5595811(+) | protein_length=417 | sequence_SO=chromosome | SO=protein_coding	0	61.055	48	11	45	11	1	417	43.6	8.62	48.46	11	0.118	0.504	0.124413	0.00932397	0.278904	0.149741	1.69	1.54	0.118	0.021	0.445	0.504	0.483	0.593	-3.09	-5.59	-1.17	-0.99	-1.05	-0.75	457699	53873.6	3.36096e+06	1.62383e+06	26.2	124.69	34.17	44.56	457699	328888	564500	53873.6	6815.5
FALSE	High	Master Protein	TGGT1_316340-t26_1-p1	transcript=TGGT1_316340-t26_1 | gene=TGGT1_316340 | organism=Toxoplasma_gondii_GT1 | gene_product=hypothetical protein | transcript_product=hypothetical protein | location=TGGT1_chrXI:5191484-5192942(+) | protein_length=243 | sequence_SO=chromosome | SO=protein_coding	0	60.813	40	9	132	9	1	243	26.8	4.92	177	9	11.757	0.766	0.00144189	0.0216564	0.0684324	0.149741	20.49	1.59	14.028	11.757	10.132	0.675	0.766	0.78	3.81	3.56	3.34	-0.57	-0.39	-0.36	2.04271e+06	2.06969e+07	3.31537e+06	2.53844e+06	52.74	48.86	54.65	59.56	775374	2.66868e+06	2.04271e+06	1.0877e+07	3.13763e+07
FALSE	High	Master Protein	TGGT1_232600-t26_1-p1	transcript=TGGT1_232600-t26_1 | gene=TGGT1_232600 | organism=Toxoplasma_gondii_GT1 | gene_product=phospholipase, patatin family protein | transcript_product=phospholipase, patatin family protein | location=TGGT1_chrVIII:2182196-2184854(+) | protein_length=665 | sequence_SO=chromosome | SO=protein_coding	0	60.32	24	10	28	10	1	665	70.7	4.58	42.86	10	1.068	0.478					146.87	1.08	1.068	100	0.01	0.342	0.478	0.494	0.09	6.64	-6.64	-1.55	-1.06	-1.02	63960	30971.2	2.02651e+06	969381	59.17	46.98	64.3	75.93	40957.8		99880.4	43743.6	21928.1
FALSE	High	Master Protein	TGGT1_215980-t26_1-p1	transcript=TGGT1_215980-t26_1 | gene=TGGT1_215980 | organism=Toxoplasma_gondii_GT1 | gene_product=hypothetical protein | transcript_product=hypothetical protein | location=TGGT1_chrXI:6414554-6415186(+) | protein_length=210 | sequence_SO=chromosome | SO=protein_coding	0	60.242	36	6	134	6	1	210	24.5	8.34	180.65	6	1.177	1.033	0.559224	0.290066	0.640909	0.418352	20.39	2.83	1.177	0.844	1.339	1.014	1.033	1.201	0.24	-0.24	0.42	0.02	0.05	0.26	789299	1.05708e+06	1.07247e+07	1.08697e+07	30.59	43.75	56.82	66.96	1.01027e+06	534606	789299	1.18945e+06	451423
FALSE	High	Master Protein	TGGT1_299810-t26_1-p1	transcript=TGGT1_299810-t26_1 | gene=TGGT1_299810 | organism=Toxoplasma_gondii_GT1 | gene_product=cysteine-tRNA synthetase (CysRS) | transcript_product=cysteine-tRNA synthetase (CysRS) | location=TGGT1_chrXII:289809-302095(-) | protein_length=898 | sequence_SO=chromosome | SO=protein_coding	0	60.104	14	9	25	9	1	898	101.5	8.43	44.39	9	100	0.892					0	25.63	100	100	100	2.228	0.892	0.698	6.64	6.64	6.64	1.16	-0.17	-0.52	11473.4	665615	715730	638297		72.21	112.08	79.33		11473.4		665615	1.57912e+06
FALSE	High	Master Protein	TGGT1_233480-t26_1-p1	transcript=TGGT1_233480-t26_1 | gene=TGGT1_233480 | organism=Toxoplasma_gondii_GT1 | gene_product=SAG-related sequence SRS29C | transcript_product=SAG-related sequence SRS29C | location=TGGT1_chrVIII:2667297-2668415(+) | protein_length=372 | sequence_SO=chromosome | SO=protein_coding	0	59.91	29	7	107	7	1	372	39.2	7.52	126.77	7	1.182	0.495	0.949851	0.094328	0.961636	0.210305	37.91	9.07	0.534	1.484	1.182	0.371	0.776	0.495	-0.91	0.57	0.24	-1.43	-0.36	-1.02	2.45513e+06	1.58035e+06	4.0745e+06	3.16373e+06	40.4	43.87	112.29	104.96	2.46952e+06	1065105	2.45513e+06	1.3186e+06	1.58035e+06
FALSE	High	Master Protein	TGGT1_300140-t26_1-p1	transcript=TGGT1_300140-t26_1 | gene=TGGT1_300140 | organism=Toxoplasma_gondii_GT1 | gene_product=putative elongation factor 1-gamma | transcript_product=putative elongation factor 1-gamma | location=TGGT1_chrXII:146844-149444(+) | protein_length=394 | sequence_SO=chromosome | SO=protein_coding	0	59.735	33	10	102	10	1	394	44	6.3	162.54	10	1.973	0.924	0.202585	0.346028	0.332608	0.470598	44.13	12.09	0.983	2.561	1.973	0.924	1.012	0.643	-0.03	1.36	0.98	-0.11	0.02	-0.64	411290	705354	1.11889e+07	1.13263e+07	32.75	27.95	72.09	48.02	648206	411290	357448	637058	1.05318e+06
FALSE	High	Master Protein	TGGT1_316540-t26_1-p1	transcript=TGGT1_316540-t26_1 | gene=TGGT1_316540 | organism=Toxoplasma_gondii_GT1 | gene_product=IMC sub-compartment protein ISP3 | transcript_product=IMC sub-compartment protein ISP3 | location=TGGT1_chrXI:5335579-5336073(-) | protein_length=164 | sequence_SO=chromosome | SO=protein_coding	0	59.682	44	5	55	5	1	164	18.4	5.27	83.55	5	2.274	0.783					3258.59	1.72	100	0.052		0.783	0.961	0.769	6.64	-4.27		-0.35	-0.06	-0.38	220705	31716.9	2.31855e+06	2.22736e+06		109.01	99.87	92.92		220705		88163.9	11410.2
FALSE	High	Master Protein	TGGT1_222860-t26_1-p1	transcript=TGGT1_222860-t26_1 | gene=TGGT1_222860 | organism=Toxoplasma_gondii_GT1 | gene_product=putative eukaryotic translation initiation factor | transcript_product=putative eukaryotic translation initiation factor | location=TGGT1_chrII:1241196-1252687(-) | protein_length=756 | sequence_SO=chromosome | SO=protein_coding	0	59.596	20	12	50	12	1	756	88.3	5.5	62.17	12	1.596	0.782	0.840699	0.0266206	0.875013	0.161762	13.17	2.4	1.596	1.738	0.479	0.803	0.782	0.691	0.67	0.8	-1.06	-0.32	-0.35	-0.53	327129	437328	3.00226e+06	2.34837e+06	94.53	49.41	89.49	81.54	327129	96051	912625	522188	166943
FALSE	High	Master Protein	TGGT1_262730-t26_1-p1	transcript=TGGT1_262730-t26_1 | gene=TGGT1_262730 | organism=Toxoplasma_gondii_GT1 | gene_product=rhoptry protein ROP16 | transcript_product=rhoptry protein ROP16 | location=TGGT1_chrVIIb:1028456-1030579(-) | protein_length=707 | sequence_SO=chromosome | SO=protein_coding	0	59.094	32	11	26	11	1	707	76.1	9.07	32.55	11	100	0.197					0	2.12	100	0.01	100	0.468	0.124	0.197	6.64	-6.64	6.64	-1.1	-3.01	-2.35	11559.2	27551.9	5.20606e+06	644783		46.42	90.26	93.71		11559.2		19594.4
FALSE	High	Master Protein	TGGT1_235020-t26_1-p1	transcript=TGGT1_235020-t26_1 | gene=TGGT1_235020 | organism=Toxoplasma_gondii_GT1 | gene_product=putative COPI protein | transcript_product=putative COPI protein | location=TGGT1_chrX:4501792-4518157(-) | protein_length=1256 | sequence_SO=chromosome | SO=protein_coding	0	58.986	16	13	21	13	1	1256	137	6.16	35.94	13	0.01	0.522					0	32.35	100	0.01	0.01	0.01	0.94	0.522	6.64	-6.64	-6.64	-6.64	-0.09	-0.94	20503.6	28105.7	125746	344329	125.23		160.05	132.28		5052.98	83197.7	28105.7
FALSE	High	Master Protein	TGGT1_293690-t26_1-p1	transcript=TGGT1_293690-t26_1 | gene=TGGT1_293690 | organism=Toxoplasma_gondii_GT1 | gene_product=profilin PRF | transcript_product=profilin PRF | location=TGGT1_chrIa:496750-498091(-) | protein_length=165 | sequence_SO=chromosome | SO=protein_coding	0	58.969	40	5	133	5	1	165	17.7	4.58	328.63	5	0.705	0.707	0.0336415	0.00759447	0.200625	0.149741	0.45	2.64	0.705	0.709	0.555	0.707	0.754	0.681	-0.51	-0.5	-0.85	-0.5	-0.41	-0.55	880624	624331	1.5663e+07	1.18084e+07	21.9	30.92	62.61	58.44	1.23777e+06	880624	847125	872191	624331
FALSE	High	Master Protein	TGGT1_232280-t26_1-p1	transcript=TGGT1_232280-t26_1 | gene=TGGT1_232280 | organism=Toxoplasma_gondii_GT1 | gene_product=hypothetical protein | transcript_product=hypothetical protein | location=TGGT1_chrVIII:1988375-1990326(+) | protein_length=275 | sequence_SO=chromosome | SO=protein_coding	0	58.491	59	10	34	10	1	275	30.1	6.11	38.44	10	1.358	0.593					2.71	0.92	1.383	1.358	0.01	0.593	0.583	0.62	0.47	0.44	-6.64	-0.75	-0.78	-0.69	109191	154882	3.86313e+06	2.25208e+06	55.72	6.11	62.06	65.23	116904	109191	30710.6	161720	148334
FALSE	High	Master Protein	TGGT1_310030-t26_1-p1	transcript=TGGT1_310030-t26_1 | gene=TGGT1_310030 | organism=Toxoplasma_gondii_GT1 | gene_product=putative cyclase-associated protein | transcript_product=putative cyclase-associated protein | location=TGGT1_chrXI:977166-978111(-) | protein_length=203 | sequence_SO=chromosome | SO=protein_coding	0	58.436	45	7	74	7	1	203	22.5	6.76	98.03	7	0.377	0.814	0.134679	0.0413043	0.282094	0.166604	11.46	7.19	0.582	0.104	0.377	0.754	0.814	0.876	-0.78	-3.26	-1.41	-0.41	-0.3	-0.19	218447	35262.1	6.03789e+06	4.91272e+06	73.93	128.1	28.92	36.33	473451	218447	93637.5	275438	22790.3
FALSE	High	Master Protein	TGGT1_249990-t26_1-p1	transcript=TGGT1_249990-t26_1 | gene=TGGT1_249990 | organism=Toxoplasma_gondii_GT1 | gene_product=hypothetical protein | transcript_product=hypothetical protein | location=TGGT1_chrXII:4909167-4913985(-) | protein_length=838 | sequence_SO=chromosome | SO=protein_coding	0	58.402	22	12	23	12	1	838	92.7	8.25	32.32	12	0.01	0.905					0	0.7		0.01		0.9	0.905	1.263		-6.64		-0.15	-0.14	0.34	11872.3		597703	541185			109.3	124.08		11872.3
FALSE	High	Master Protein	TGGT1_319560-t26_1-p1	transcript=TGGT1_319560-t26_1 | gene=TGGT1_319560 | organism=Toxoplasma_gondii_GT1 | gene_product=microneme protein MIC3 | transcript_product=microneme protein MIC3 | location=TGGT1_chrIV:856315-857588(+) | protein_length=383 | sequence_SO=chromosome | SO=protein_coding	0	58.073	34	8	76	8	1	383	40.5	6.64	107.77	8	0.829	0.988	0.0781643	0.44634	0.245316	0.55861	4.87	6.37	0.693	0.829	0.869	0.988	1.031	0.62	-0.53	-0.27	-0.2	-0.02	0.04	-0.69	1.40822e+06	1.11523e+06	1.62809e+06	1.67906e+06	40.37	44.72	115.02	90.1	1.40822e+06	2.56697e+06	1.28371e+06	976088	2.12839e+06
FALSE	High	Master Protein	TGGT1_247520-t26_1-p1	transcript=TGGT1_247520-t26_1 | gene=TGGT1_247520 | organism=Toxoplasma_gondii_GT1 | gene_product=hypothetical protein | transcript_product=hypothetical protein | location=TGGT1_chrXII:3323216-3323986(-) | protein_length=256 | sequence_SO=chromosome | SO=protein_coding	0	57.466	33	5	120	5	1	256	26.3	11.06	150.11	5	1.079	0.837	0.410746	0.0782682	0.515644	0.199549	16.83	9.23	1.079	4.158	0.957	0.837	0.912	0.754	0.11	2.06	-0.06	-0.26	-0.13	-0.41	615829	719569	8.98476e+06	7.7185e+06	50.8	18.7	55.27	45.76	666701	206699	615829	719569	859447
FALSE	High	Master Protein	TGGT1_224060-t26_1-p1	transcript=TGGT1_224060-t26_1 | gene=TGGT1_224060 | organism=Toxoplasma_gondii_GT1 | gene_product=putative thioredoxin | transcript_product=putative thioredoxin | location=TGGT1_chrX:3262854-3264722(-) | protein_length=622 | sequence_SO=chromosome | SO=protein_coding	0	57.408	29	12	26	12	1	622	68.9	6.7	35.59	12	0.01	0.655					0	14.9	0.121	0.01	0.01	0.867	0.655	0.502	-3.04	-6.64	-6.64	-0.21	-0.61	-1	122509	32368.6	914415	716838	68.98		125.43	107.41	266986	64316	122509	32368.6
FALSE	High	Master Protein	TGGT1_207640-t26_1-p1	transcript=TGGT1_207640-t26_1 | gene=TGGT1_207640 | organism=Toxoplasma_gondii_GT1 | gene_product=isoleucyl-tRNA synthetase family protein | transcript_product=isoleucyl-tRNA synthetase family protein | location=TGGT1_chrIb:186451-201730(-) | protein_length=1242 | sequence_SO=chromosome | SO=protein_coding	0	57.095	20	17	34	17	1	1242	141.3	7.5	31.97	17	2.49	1.96					88.82	53.63	2.49	0.998	100	1.96	2.669	0.442	1.32	0	6.64	0.97	1.42	-1.18	43286.2	72233.5	894927	2.38885e+06	42.43	14.66	145.16	76.68	31762.1	58991.4		79093.9	58896.3
FALSE	High	Master Protein	TGGT1_263870-t26_1-p1	transcript=TGGT1_263870-t26_1 | gene=TGGT1_263870 | organism=Toxoplasma_gondii_GT1 | gene_product=glutamate-tRNA ligase | transcript_product=glutamate-tRNA ligase | location=TGGT1_chrVIIb:247108-256643(-) | protein_length=828 | sequence_SO=chromosome | SO=protein_coding	0	57.034	18	12	35	12	1	828	92.5	8.85	29.72	12	0.226	0.668					7.22	1.34	0.226	0.537	0.01	0.655	0.865	0.668	-2.15	-0.9	-6.64	-0.61	-0.21	-0.58	671402	159005	3.59726e+06	3.11288e+06	63.8	6.79	64.23	58.25	671402	310793	1.2529e+06	151549	166827
FALSE	High	Master Protein	TGGT1_223960-t26_1-p1	transcript=TGGT1_223960-t26_1 | gene=TGGT1_223960 | organism=Toxoplasma_gondii_GT1 | gene_product=ubiquitin interaction motif family protein | transcript_product=ubiquitin interaction motif family protein | location=TGGT1_chrX:3328529-3332678(-) | protein_length=388 | sequence_SO=chromosome | SO=protein_coding	0	56.834	46	11	31	11	1	388	41.4	4.59	40.6	11	0.453	0.55	0.181436	0.0142273	0.315004	0.149741	18.34	1.5	0.453	0.831	0.179	0.532	0.658	0.55	-1.14	-0.27	-2.48	-0.91	-0.6	-0.86	136645	61860.9	1.53377e+06	1.00958e+06	56.6	19.19	76.75	72.12	136645	81644.5	256947	61860.9	67874.7
FALSE	High	Master Protein	TGGT1_313010-t26_1-p1	transcript=TGGT1_313010-t26_1 | gene=TGGT1_313010 | organism=Toxoplasma_gondii_GT1 | gene_product=DEAD (Asp-Glu-Ala-Asp) box polypeptide DDX6 | transcript_product=DEAD (Asp-Glu-Ala-Asp) box polypeptide DDX6 | location=TGGT1_chrXI:2995385-2998767(-) | protein_length=475 | sequence_SO=chromosome | SO=protein_coding	0	56.61	29	9	36	9	1	475	53.4	8.44	36.28	9	1.104	0.787					43.98	12.74	1.104	0.776	100	0.896	0.787	0.366	0.14	-0.36	6.64	-0.16	-0.35	-1.45	73124.6	116550	2.04936e+06	1.61292e+06	49.72	53.79	106.15	61.69	105575	50648.6		116550	39328
FALSE	High	Master Protein	TGGT1_299050-t26_1-p1	transcript=TGGT1_299050-t26_1 | gene=TGGT1_299050 | organism=Toxoplasma_gondii_GT1 | gene_product=ribosomal protein RPL17 | transcript_product=ribosomal protein RPL17 | location=TGGT1_chrIII:2205438-2207707(-) | protein_length=195 | sequence_SO=chromosome | SO=protein_coding	0	56.29	33	7	93	7	1	195	22.3	10.17	134.69	7	0.841	0.801	0.148881	0.138065	0.292035	0.265711	12.56	14.3	0.702	0.941	0.841	0.801	0.921	0.648	-0.51	-0.09	-0.25	-0.32	-0.12	-0.62	1.15652e+06	913473	7.94957e+06	7.32543e+06	23.15	12.24	63.9	46.57	1.30092e+06	810265	1.15652e+06	913473	762850
FALSE	High	Master Protein	TGGT1_273960-t26_1-p1	transcript=TGGT1_273960-t26_1 | gene=TGGT1_273960 | organism=Toxoplasma_gondii_GT1 | gene_product=chaperonin GroS protein | transcript_product=chaperonin GroS protein | location=TGGT1_chrVIII:3141275-3146091(+) | protein_length=374 | sequence_SO=chromosome | SO=protein_coding	0	56.211	37	10	45	10	1	374	39.9	7.4	43.36	10	0.01	0.742					0	2.41	0.287	0.01	0.01	0.742	0.764	0.402	-1.8	-6.64	-6.64	-0.43	-0.39	-1.32	98204.3	60570	2.90961e+06	2.22385e+06	62.17		75.36	38.48	210760	63168.9	98204.3	60570
FALSE	High	Master Protein	TGGT1_223390-t26_1-p1	transcript=TGGT1_223390-t26_1 | gene=TGGT1_223390 | organism=Toxoplasma_gondii_GT1 | gene_product=putative activating signal cointegrator 1 complex subunit 3 family 1 ASCC3L1 | transcript_product=putative activating signal cointegrator 1 complex subunit 3 family 1 ASCC3L1 | location=TGGT1_chrX:3771178-3788152(+) | protein_length=2207 | sequence_SO=chromosome | SO=protein_coding	0	56.018	10	13	20	13	1	2207	248.3	6.32	19.4	13	0.01	0.842					0	31.8	0.01			0.842	1.097	0.459	-6.64			-0.25	0.13	-1.12	33487.1		201406	220851			133.97	102.27	33487.1
FALSE	High	Master Protein	TGGT1_242330-t26_1-p1	transcript=TGGT1_242330-t26_1 | gene=TGGT1_242330 | organism=Toxoplasma_gondii_GT1 | gene_product=ribosomal protein RPS5 | transcript_product=ribosomal protein RPS5 | location=TGGT1_chrVI:1882939-1884008(-) | protein_length=192 | sequence_SO=chromosome | SO=protein_coding	0	55.816	47	8	62	8	1	192	21.6	9.74	90.98	8	0.044	0.907	0.0448142	0.561249	0.212607	0.650538	0.2	50.08	0.145	0.044	0.014	0.907	1.279	0.468	-2.79	-4.51	-6.21	-0.14	0.36	-1.1	4.70033e+06	229850	4.702e+06	4.72763e+06	7.96	98.88	49.12	16.11	4.70033e+06	5.25335e+06	4.51564e+06	680641	229850
FALSE	High	Master Protein	TGGT1_230410-t26_1-p1	transcript=TGGT1_230410-t26_1 | gene=TGGT1_230410 | organism=Toxoplasma_gondii_GT1 | gene_product=peroxiredoxin PRX3 | transcript_product=peroxiredoxin PRX3 | location=TGGT1_chrVIII:753559-755687(-) | protein_length=283 | sequence_SO=chromosome | SO=protein_coding	0	55.666	28	8	155	8	1	283	30.4	8.78	174.72	8	0.737	0.895	0.263869	0.141531	0.391485	0.266313	0.02	2.71	0.736	1.057	0.737	0.915	0.895	0.729	-0.44	0.08	-0.44	-0.13	-0.16	-0.46	1.55735e+06	1.14719e+06	1.31923e+07	1.18076e+07	29.58	12.85	57.98	44.66	1.78815e+06	964303	1.55735e+06	1.31683e+06	1.01949e+06
FALSE	High	Master Protein	TGGT1_246130-t26_1-p1	transcript=TGGT1_246130-t26_1 | gene=TGGT1_246130 | organism=Toxoplasma_gondii_GT1 | gene_product=serpin (serine proteinase inhibitor) superfamily protein | transcript_product=serpin (serine proteinase inhibitor) superfamily protein | location=TGGT1_chrXII:2610457-2612239(+) | protein_length=432 | sequence_SO=chromosome | SO=protein_coding	0	55.441	42	11	30	11	1	432	47.4	6.62	30.31	11	0.168	0.676					3.92	5.86	0.168	3.26	0.01	0.617	0.818	0.676	-2.58	1.7	-6.64	-0.7	-0.29	-0.57	33197.8	35322.8	1.60681e+06	1.12416e+06	91.19	77.45	91.6	88.79	113844	20042.8	33197.8	19097.3	65333.8
FALSE	High	Master Protein	TGGT1_275810-t26_1-p1	transcript=TGGT1_275810-t26_1 | gene=TGGT1_275810 | organism=Toxoplasma_gondii_GT1 | gene_product=ribosomal protein RPS10 | transcript_product=ribosomal protein RPS10 | location=TGGT1_chrIII:201999-204232(+) | protein_length=152 | sequence_SO=chromosome | SO=protein_coding	0	55.353	57	6	58	6	1	152	17.4	10.14	85.88	6	1.078	1.133	0.469819	0.0930473	0.560486	0.210305	30.22	3.34	0.858	1.078	3.015	1.133	1.158	1.037	-0.22	0.11	1.59	0.18	0.21	0.05	207889	282059	4.99841e+06	5.66178e+06	94.02	51.91	52.45	46.05	667035	207889	93550.8	572365	224060
FALSE	High	Master Protein	TGGT1_284560-t26_1-p1	transcript=TGGT1_284560-t26_1 | gene=TGGT1_284560 | organism=Toxoplasma_gondii_GT1 | gene_product=ribosomal protein RPL9 | transcript_product=ribosomal protein RPL9 | location=TGGT1_chrV:2561959-2564374(+) | protein_length=190 | sequence_SO=chromosome | SO=protein_coding	0	55.04	47	7	77	7	1	190	21.4	9.64	95.25	7	0.726	0.785	0.0577141	0.376549	0.230857	0.500429	10.5	34.19	0.726	0.823	0.617	0.785	1.139	0.491	-0.46	-0.28	-0.7	-0.35	0.19	-1.03	1.38927e+06	1.00807e+06	7.24647e+06	7.1715e+06	14.43	26.89	49.34	26.07	1.38927e+06	1.40646e+06	1.07575e+06	1.00807e+06	1.15786e+06
FALSE	High	Master Protein	TGGT1_214790-t26_1-p1	transcript=TGGT1_214790-t26_1 | gene=TGGT1_214790 | organism=Toxoplasma_gondii_GT1 | gene_product=glycoprotein | transcript_product=glycoprotein | location=TGGT1_chrX:6386376-6388397(+) | protein_length=283 | sequence_SO=chromosome | SO=protein_coding	0	55.039	25	6	41	6	1	283	31.4	4.77	32.6	6	0.515	0.899	0.392459	0.120756	0.501705	0.243766	16.07	0.27	1.445	0.515	0.305	0.899	0.901	0.739	0.53	-0.96	-1.71	-0.15	-0.15	-0.44	205272	120710	3.18155e+06	2.86626e+06	18.52	62.28	109.28	99.37	160750	234345	205272	232291	120710
FALSE	High	Master Protein	TGGT1_249780-t26_1-p1	transcript=TGGT1_249780-t26_1 | gene=TGGT1_249780 | organism=Toxoplasma_gondii_GT1 | gene_product=hypothetical protein | transcript_product=hypothetical protein | location=TGGT1_chrXII:4731604-4732590(-) | protein_length=328 | sequence_SO=chromosome | SO=protein_coding	0	54.972	42	8	33	8	1	328	35.5	5.27	50.59	8	12.694	0.834	0.00175736	0.422316	0.0684324	0.538454	17.14	6.89	12.694	11.226	16.231	1.111	0.834	0.779	3.67	3.49	4.02	0.15	-0.26	-0.36	166706	1.87144e+06	1.61905e+06	1.46068e+06	50.09	69.08	97.21	85.5	118603	166706	309559	1.50553e+06	1.87144e+06
FALSE	High	Master Protein	TGGT1_292130-t26_1-p1	transcript=TGGT1_292130-t26_1 | gene=TGGT1_292130 | organism=Toxoplasma_gondii_GT1 | gene_product=ribosomal protein RPL13A | transcript_product=ribosomal protein RPL13A | location=TGGT1_chrIX:4373947-4376715(-) | protein_length=286 | sequence_SO=chromosome | SO=protein_coding	0	54.91	26	6	98	6	1	286	32.7	10.65	197.02	6	0.332	0.776					15.86	11.11	2.369	0.01	0.332	0.776	1.355	0.679	1.24	-6.64	-1.59	-0.37	0.44	-0.56	194402	153985	7.33301e+06	9.64096e+06	38.2	73.46	85.13	60.12	115592	194402	260751	273820
FALSE	High	Master Protein	TGGT1_216000-t26_1-p1	transcript=TGGT1_216000-t26_1 | gene=TGGT1_216000 | organism=Toxoplasma_gondii_GT1 | gene_product=alveolin domain containing intermediate filament IMC3 | transcript_product=alveolin domain containing intermediate filament IMC3 | location=TGGT1_chrXI:6395592-6397208(+) | protein_length=538 | sequence_SO=chromosome | SO=protein_coding	0	54.83	23	8	56	8	1	538	58	5.34	94.08	8	0.473	0.579	0.00665494	0.0952047	0.0926306	0.211106	2.56	8.73	0.41	0.509	0.473	0.478	0.579	0.833	-1.29	-0.97	-1.08	-1.07	-0.79	-0.26	1.00152e+06	431604	7.64794e+06	3.6731e+06	60.18	56.78	53.7	82.19	1.05176e+06	233329	1.00152e+06	431604	118806
FALSE	High	Master Protein	TGGT1_202530-t26_1-p1	transcript=TGGT1_202530-t26_1 | gene=TGGT1_202530 | organism=Toxoplasma_gondii_GT1 | gene_product=aspartate-tRNA ligase | transcript_product=aspartate-tRNA ligase | location=TGGT1_chrVIIa:3153086-3158845(-) | protein_length=773 | sequence_SO=chromosome | SO=protein_coding	0	54.606	23	14	43	14	1	773	86.7	8.22	32.73	14	0.988	1.479	0.618707	0.402483	0.684719	0.522971	22.94	70.82	0.988	1.883	0.831	1.479	3.365	0.772	-0.02	0.91	-0.27	0.56	1.75	-0.37	84245.4	72793.6	2.03305e+06	4.45949e+06	61.91	46.18	79.61	56.44	151077	38663.8	84245.4	149229	72793.6
FALSE	High	Master Protein	TGGT1_239740-t26_1-p1	transcript=TGGT1_239740-t26_1 | gene=TGGT1_239740 | organism=Toxoplasma_gondii_GT1 | gene_product=dense granule protein GRA14 | transcript_product=dense granule protein GRA14 | location=TGGT1_chrVI:875718-876944(-) | protein_length=408 | sequence_SO=chromosome | SO=protein_coding	0	54.369	28	8	42	8	1	408	44.7	8.5	28.56	8	53.153	0.655					130.67	0.28	53.153	0.111	100	0.655	0.652	0.995	5.73	-3.18	6.64	-0.61	-0.62	-0.01	281924	5.22426e+06	3.04913e+06	1989475	110.77	103.33	52.63	77.91	98287.1	808663		5.22426e+06	89413.8
FALSE	High	Master Protein	TGGT1_283850-t26_1-p1	transcript=TGGT1_283850-t26_1 | gene=TGGT1_283850 | organism=Toxoplasma_gondii_GT1 | gene_product=peptidyl-prolyl cis-trans isomerase | transcript_product=peptidyl-prolyl cis-trans isomerase | location=TGGT1_chrV:2748825-2756049(-) | protein_length=503 | sequence_SO=chromosome | SO=protein_coding	0	54.318	25	8	37	8	1	503	55.5	5.59	60.87	8	0.636	0.714					58.93	0.87	100	0.636	0.01	0.705	0.714	1.17	6.64	-0.65	-6.64	-0.5	-0.49	0.23	339983	157717	1.67292e+06	1.19396e+06	70.67	32.52	92.31	117.11		196368	588633	199327	124792
FALSE	High	Master Protein	TGGT1_215460-t26_1-p1	transcript=TGGT1_215460-t26_1 | gene=TGGT1_215460 | organism=Toxoplasma_gondii_GT1 | gene_product=ribosomal protein RPS24 | transcript_product=ribosomal protein RPS24 | location=TGGT1_chrX:6863478-6865141(-) | protein_length=267 | sequence_SO=chromosome | SO=protein_coding	0	53.833	21	6	121	6	1	267	30.4	11.08	193.86	6	0.804	0.898	0.222145	0.687239	0.355433	0.753746	5.43	33.66	0.804	0.85	0.388	0.898	1.302	0.645	-0.31	-0.23	-1.37	-0.16	0.38	-0.63	779431	423422	6.0842e+06	7.9188e+06	30.03	47.26	84.37	53	935250	498240	779431	752181	423422
FALSE	High	Master Protein	TGGT1_305160-t26_1-p1	transcript=TGGT1_305160-t26_1 | gene=TGGT1_305160 | organism=Toxoplasma_gondii_GT1 | gene_product=histone H2Ba | transcript_product=histone H2Ba | location=TGGT1_chrIX:5039074-5039424(+) | protein_length=116 | sequence_SO=chromosome | SO=protein_coding	0	53.801	45	6	231	5	1	116	12.6	10.1	258.94	6	0.659	0.654	0.0221321	0.142295	0.15842	0.266313	1.21	1.15	0.647	0.772	0.659	0.642	0.954	0.654	-0.63	-0.37	-0.6	-0.64	-0.07	-0.61	5.94223e+06	3.84364e+06	4.33749e+07	4.13989e+07	47.8	42.37	81.3	70.05	5.94223e+06	2.68485e+06	7.89629e+06	3.84364e+06	2.07251e+06
FALSE	High	Master Protein	TGGT1_269250-t26_1-p1	transcript=TGGT1_269250-t26_1 | gene=TGGT1_269250 | organism=Toxoplasma_gondii_GT1 | gene_product=Mov34/MPN/PAD-1 family protein | transcript_product=Mov34/MPN/PAD-1 family protein | location=TGGT1_chrVIII:5961179-5966031(-) | protein_length=343 | sequence_SO=chromosome | SO=protein_coding	0	53.605	33	7	18	7	1	343	38.4	6.25	26.64	7		0.996						38.75				1.259	0.996	0.734				0.33	-0.01	-0.45			280546	321504			135.33	119.49
FALSE	High	Master Protein	TGGT1_244250-t26_1-p1	transcript=TGGT1_244250-t26_1 | gene=TGGT1_244250 | organism=Toxoplasma_gondii_GT1 | gene_product=hypothetical protein | transcript_product=hypothetical protein | location=TGGT1_chrVI:3053040-3055892(-) | protein_length=616 | sequence_SO=chromosome | SO=protein_coding	0	53.407	22	8	26	8	1	616	62.8	4.08	34.28	8	0.731	0.758	0.132592	0.0202855	0.280298	0.149741	14.07	2.02	0.731	0.919	0.601	0.776	0.672	0.758	-0.45	-0.12	-0.73	-0.37	-0.57	-0.4	514353	376099	977761	759009	58.7	38.81	97.34	99.17	514353	339218	1.05595e+06	376099	311725
FALSE	High	Master Protein	TGGT1_305340-t26_1-p1	transcript=TGGT1_305340-t26_1 | gene=TGGT1_305340 | organism=Toxoplasma_gondii_GT1 | gene_product=corepressor complex CRC230 | transcript_product=corepressor complex CRC230 | location=TGGT1_chrIX:5155746-5169422(+) | protein_length=1916 | sequence_SO=chromosome | SO=protein_coding	0	53.385	10	13	26	13	1	1916	207.2	5.95	24.98	13	100	9.074					0	810.23	100	100	100		100	0.823	6.64	6.64	6.64		6.64	-0.28		278501	1.49052e+06	899357		61.19		42.6				278501	214206
FALSE	High	Master Protein	TGGT1_308860-t26_1-p1	transcript=TGGT1_308860-t26_1 | gene=TGGT1_308860 | organism=Toxoplasma_gondii_GT1 | gene_product=hypothetical protein | transcript_product=hypothetical protein | location=TGGT1_chrXI:267813-271388(-) | protein_length=654 | sequence_SO=chromosome | SO=protein_coding	0	52.256	23	9	34	9	1	654	69.5	10.01	41.84	9	0.612	0.696	0.157864	0.0468224	0.300974	0.166604	18.14	6.1	0.612	0.812	0.317	0.554	0.755	0.696	-0.71	-0.3	-1.66	-0.85	-0.41	-0.52	224746	109799	3.67864e+06	2.77659e+06	34.88	43.84	66.33	70.36	283908	135206	224746	173816	109799
FALSE	High	Master Protein	TGGT1_263130-t26_1-p1	transcript=TGGT1_263130-t26_1 | gene=TGGT1_263130 | organism=Toxoplasma_gondii_GT1 | gene_product=putative citrate synthase | transcript_product=putative citrate synthase | location=TGGT1_chrVIIb:754263-759706(+) | protein_length=620 | sequence_SO=chromosome | SO=protein_coding	0	51.871	20	8	34	8	1	620	69.1	8.37	61.55	8	0.01	0.382					0	4.83	0.01	0.599	0.01	0.382	0.695	0.296	-6.64	-0.74	-6.64	-1.39	-0.52	-1.75	955659	13916.9	1.38489e+06	962531	116.31	89.88	93.34	63.8	955659	49215	3.24912e+06	6569.16	29483.3
FALSE	High	Master Protein	TGGT1_262690-t26_1-p1	transcript=TGGT1_262690-t26_1 | gene=TGGT1_262690 | organism=Toxoplasma_gondii_GT1 | gene_product=ribosomal protein RPL27 | transcript_product=ribosomal protein RPL27 | location=TGGT1_chrVIIb:1055303-1056255(+) | protein_length=142 | sequence_SO=chromosome | SO=protein_coding	0	51.866	40	6	120	6	1	142	16.3	10.37	95.57	6	1.78	0.839	0.0421649	0.0750786	0.208887	0.197626	18.09	7.15	1.78	2.47	1.563	0.896	0.839	0.738	0.83	1.3	0.64	-0.16	-0.25	-0.44	565418	1.3968e+06	1.03812e+07	8.70602e+06	53.84	50.19	49.9	39.81	1.17321e+06	565418	442177	2.08808e+06	1.3968e+06
FALSE	High	Master Protein	TGGT1_278050-t26_1-p1	transcript=TGGT1_278050-t26_1 | gene=TGGT1_278050 | organism=Toxoplasma_gondii_GT1 | gene_product=putative proteasome subunit alpha type 1 | transcript_product=putative proteasome subunit alpha type 1 | location=TGGT1_chrXII:6244565-6249677(-) | protein_length=247 | sequence_SO=chromosome | SO=protein_coding	0	51.356	33	6	43	6	1	247	27.2	6.15	51	6	0.01	0.521					0	0.38	0.01	0.01	0.01	0.525	0.521	0.237	-6.64	-6.64	-6.64	-0.93	-0.94	-2.08	160173		3.42028e+06	1.78028e+06	42.49		63.77	14	137918	160173	292697
FALSE	High	Master Protein	TGGT1_215260-t26_1-p1	transcript=TGGT1_215260-t26_1 | gene=TGGT1_215260 | organism=Toxoplasma_gondii_GT1 | gene_product=carbamoylphosphate synthetase | transcript_product=carbamoylphosphate synthetase | location=TGGT1_chrX:6736108-6760149(-) | protein_length=1699 | sequence_SO=chromosome | SO=protein_coding	0	50.976	8	11	17	11	1	1699	187	6.47	20.99	11	0.696	0.74					219.87	32.05	4.372	0.111		0.74	1.259	0.448	2.13	-3.17		-0.43	0.33	-1.16	28900.8	20115.6	310972	242918	69.35	121.9	144.13	118.86	16899.5	49425.1		73888.8	5476.3
FALSE	High	Master Protein	TGGT1_285870-t26_1-p1	transcript=TGGT1_285870-t26_1 | gene=TGGT1_285870 | organism=Toxoplasma_gondii_GT1 | gene_product=SAG-related sequence SRS20A | transcript_product=SAG-related sequence SRS20A | location=TGGT1_chrV:2015649-2017548(-) | protein_length=328 | sequence_SO=chromosome | SO=protein_coding	0	50.921	29	7	37	7	1	328	34.9	7.77	37.76	7	0.315	0.61					8.53	8.12	0.547	0.181		0.61	0.7	0.269	-0.87	-2.46		-0.71	-0.52	-1.9	142131	44753.7	1.66495e+06	1.05722e+06	32.02	92.48	99.95	46.33	178957	112884		97841	20470.9
FALSE	High	Master Protein	TGGT1_268950-t26_1-p1	transcript=TGGT1_268950-t26_1 | gene=TGGT1_268950 | organism=Toxoplasma_gondii_GT1 | gene_product=hypothetical protein | transcript_product=hypothetical protein | location=TGGT1_chrVIII:6183799-6188591(-) | protein_length=543 | sequence_SO=chromosome | SO=protein_coding	0	50.502	26	10	27	10	1	543	60.2	6.7	36.53	10	0.648	0.525					61.21	0.06	0.648	0.01	100	0.525	0.526	0.514	-0.63	-6.64	6.64	-0.93	-0.93	-0.96	46239.7	21227.8	950322	499015	28.99	70.98	105.15	104.03	56925.2	37560		36861.3
FALSE	High	Master Protein	TGGT1_220100-t26_1-p1	transcript=TGGT1_220100-t26_1 | gene=TGGT1_220100 | organism=Toxoplasma_gondii_GT1 | gene_product=phosphoribosylpyrophosphate synthetase | transcript_product=phosphoribosylpyrophosphate synthetase | location=TGGT1_chrV:29152-31918(+) | protein_length=557 | sequence_SO=chromosome | SO=protein_coding	0	50.376	22	8	31	8	1	557	61	9.47	35.27	8	0.578	1.034					31.48	0.25	0.578	0.945	0.01	0.801	1.036	1.034	-0.79	-0.08	-6.64	-0.32	0.05	0.05	175145	98040.6	2.2633e+06	2.3441e+06	52.91	49.41	40.36	49.3	244189	72003.5	175145	141194	68076.4
FALSE	High	Master Protein	TGGT1_258150-t26_1-p1	transcript=TGGT1_258150-t26_1 | gene=TGGT1_258150 | organism=Toxoplasma_gondii_GT1 | gene_product=putative proteasome subunit alpha type 7 | transcript_product=putative proteasome subunit alpha type 7 | location=TGGT1_chrVIIb:3513384-3517343(-) | protein_length=245 | sequence_SO=chromosome | SO=protein_coding	0	50.338	38	7	54	7	1	245	27.1	6.64	69.43	7	0.68	0.78					14.9	0.94	0.548	0.844		0.788	0.78	0.681	-0.87	-0.25		-0.34	-0.36	-0.55	204381	138940	3.52757e+06	2.75023e+06	76.67	52.68	70.3	61.6	375085	111366		205492	93941.8
FALSE	High	Master Protein	TGGT1_315320-t26_1-p1	transcript=TGGT1_315320-t26_1 | gene=TGGT1_315320 | organism=Toxoplasma_gondii_GT1 | gene_product=SAG-related sequence SRS52A | transcript_product=SAG-related sequence SRS52A | location=TGGT1_chrXI:4594837-4596241(+) | protein_length=329 | sequence_SO=chromosome | SO=protein_coding	0	50.288	29	7	65	7	1	329	34.2	5.52	82.38	7	0.626	0.618	0.177404	0.0108859	0.311986	0.149741	22.3	3.59	0.866	0.337	0.626	0.685	0.579	0.618	-0.21	-1.57	-0.68	-0.55	-0.79	-0.7	460889	203603	6.88058e+06	4.7157e+06	58.79	67.27	72.37	71.09	235024	460889	826169	203603	155364
FALSE	High	Master Protein	TGGT1_252290-t26_1-p1	transcript=TGGT1_252290-t26_1 | gene=TGGT1_252290 | organism=Toxoplasma_gondii_GT1 | gene_product=putative importin alpha | transcript_product=putative importin alpha | location=TGGT1_chrIII:450884-460151(+) | protein_length=545 | sequence_SO=chromosome | SO=protein_coding	0	50.116	17	8	43	8	1	545	59.3	4.94	60.58	8	0.086	0.388					0.8	4.48	0.086	0.149	0.01	0.466	0.388	0.124	-3.54	-2.75	-6.64	-1.1	-1.36	-3.01	494190	25901.1	2.33105e+06	800698	64.94	65.02	44.04	28.89	494190	105713	596750	42575.5	15757.1
FALSE	High	Master Protein	TGGT1_263040-t26_1-p1	transcript=TGGT1_263040-t26_1 | gene=TGGT1_263040 | organism=Toxoplasma_gondii_GT1 | gene_product=ribosomal protein RPS16 | transcript_product=ribosomal protein RPS16 | location=TGGT1_chrVIIb:830975-832663(+) | protein_length=211 | sequence_SO=chromosome | SO=protein_coding	0	49.819	39	8	93	8	1	211	24	10.89	131.31	8	0.881	1.058	0.393158	0.796013	0.501705	0.841382	24.88	34.38	1.071	0.881	0.41	1.058	1.315	0.813	0.1	-0.18	-1.29	0.08	0.4	-0.3	1.39267e+06	1.12117e+06	1.14332e+07	15035150	31.48	25.2	61	38.99	1.39267e+06	1.27267e+06	2.21315e+06	1.49218e+06	1.12117e+06
FALSE	High	Master Protein	TGGT1_230450-t26_1-p1	transcript=TGGT1_230450-t26_1 | gene=TGGT1_230450 | organism=Toxoplasma_gondii_GT1 | gene_product=bifunctional GMP synthase/glutamine amidotransferase protein | transcript_product=bifunctional GMP synthase/glutamine amidotransferase protein | location=TGGT1_chrVIII:791884-796519(+) | protein_length=569 | sequence_SO=chromosome | SO=protein_coding	0	49.672	25	12	34	12	1	569	62.2	6.68	46.49	12	0.074	0.712					2.99	2.2	0.552	0.01		0.733	0.592	0.712	-0.86	-6.64		-0.45	-0.76	-0.49	121051	87847	2.2263e+06	1.31905e+06	37.64		97.48	102.19	159007	92155.6		87847
FALSE	High	Master Protein	TGGT1_213350-t26_1-p1	transcript=TGGT1_213350-t26_1 | gene=TGGT1_213350 | organism=Toxoplasma_gondii_GT1 | gene_product=ribosomal protein RPS15 | transcript_product=ribosomal protein RPS15 | location=TGGT1_chrV:820008-821446(-) | protein_length=150 | sequence_SO=chromosome | SO=protein_coding	0	49.048	29	3	41	3	1	150	17.1	10.2	85.63	3	1.189	0.84	0.455151	0.909712	0.549546	0.932569	23.94	20.3	1.189	1.381	0.879	1.999	0.84	0.677	0.25	0.47	-0.19	1	-0.25	-0.56	358923	426640	5.43673e+06	4.56529e+06	37.27	56.61	77.94	38.82	358923	565329	275759	426640	780519
FALSE	High	Master Protein	TGGT1_205380-t26_1-p1	transcript=TGGT1_205380-t26_1 | gene=TGGT1_205380 | organism=Toxoplasma_gondii_GT1 | gene_product=fructose-bisphospatase I | transcript_product=fructose-bisphospatase I | location=TGGT1_chrVIIa:1342975-1346118(+) | protein_length=388 | sequence_SO=chromosome | SO=protein_coding	0	49.006	37	12	41	12	1	388	42.2	8.53	40.54	12	30.621	0.576					108	9.01	8.315	30.621	100	0.576	0.693	0.47	3.06	4.94	6.64	-0.8	-0.53	-1.09	75812.8	1.30141e+06	1.73329e+06	1.11064e+06	87.67	41.65	67.17	48.29	156516	36722.1		1.30141e+06	1.12446e+06
FALSE	High	Master Protein	TGGT1_236570-t26_1-p1	transcript=TGGT1_236570-t26_1 | gene=TGGT1_236570 | organism=Toxoplasma_gondii_GT1 | gene_product=lysine decarboxylase family protein | transcript_product=lysine decarboxylase family protein | location=TGGT1_chrX:5322842-5325476(+) | protein_length=397 | sequence_SO=chromosome | SO=protein_coding	0	48.833	25	8	58	8	1	397	43.9	6.57	64.65	8	0.989	0.985	0.773318	0.72866	0.82165	0.786551	13.64	21.97	1.082	0.989	0.883	0.985	1.136	0.787	0.11	-0.02	-0.18	-0.02	0.18	-0.35	243153	231489	3.12656e+06	3.55022e+06	7.79	16.87	41.87	25.85	271449	234177	243153	293592	231489
FALSE	High	Master Protein	TGGT1_227620-t26_1-p1	transcript=TGGT1_227620-t26_1 | gene=TGGT1_227620 | organism=Toxoplasma_gondii_GT1 | gene_product=dense granule protein GRA2 | transcript_product=dense granule protein GRA2 | location=TGGT1_chrX:779857-780655(-) | protein_length=185 | sequence_SO=chromosome | SO=protein_coding	0	48.81	30	6	339	6	1	185	19.8	9	405.04	6	0.885	0.916	0.173175	0.631918	0.309891	0.706363	7.16	17.15	0.713	0.94	0.885	0.916	0.79	1.15	-0.49	-0.09	-0.18	-0.13	-0.34	0.2	7.42523e+06	6.07491e+06	5.26928e+07	4.32038e+07	15.73	12.17	27.38	46.55	8.51702e+06	7.42523e+06	6.19611e+06	6.07491e+06	6.97725e+06
FALSE	High	Master Protein	TGGT1_305860-t26_1-p1	transcript=TGGT1_305860-t26_1 | gene=TGGT1_305860 | organism=Toxoplasma_gondii_GT1 | gene_product=calcium-dependent protein kinase CDPK3 | transcript_product=calcium-dependent protein kinase CDPK3 | location=TGGT1_chrIX:5409701-5417293(+) | protein_length=537 | sequence_SO=chromosome | SO=protein_coding	0	48.737	18	8	42	6	1	537	60.4	6.4	24.09	8	0.176	0.299					4.32	5.71	0.176	100	0.01	0.299	0.17	0.812	-2.51	6.64	-6.64	-1.74	-2.56	-0.3	232671	106381	1.91347e+06	682004	28.36	90.04	23.37	57.36	285114		189875	50119.3	225801
FALSE	High	Master Protein	TGGT1_220400-t26_1-p1	transcript=TGGT1_220400-t26_1 | gene=TGGT1_220400 | organism=Toxoplasma_gondii_GT1 | gene_product=actin depolymerizing factor ADF | transcript_product=actin depolymerizing factor ADF | location=TGGT1_chrV:254875-256188(-) | protein_length=118 | sequence_SO=chromosome | SO=protein_coding	0	48.643	53	6	114	6	1	118	12.9	7.75	152.27	6	0.895	0.69	0.25345	0.0237422	0.38585	0.1583	11.23	0.85	1.014	0.895	0.81	0.69	0.8	0.682	0.02	-0.16	-0.3	-0.53	-0.32	-0.55	687953	656357	2.31191e+07	1.59624e+07	55.88	55.25	83.27	78.72	687953	208784	810482	697252	186759
FALSE	High	Master Protein	TGGT1_279380-t26_1-p1	transcript=TGGT1_279380-t26_1 | gene=TGGT1_279380 | organism=Toxoplasma_gondii_GT1 | gene_product=hypothetical protein | transcript_product=hypothetical protein | location=TGGT1_chrIX:50522-55380(+) | protein_length=320 | sequence_SO=chromosome | SO=protein_coding	0	48.589	27	8	59	8	1	320	34.7	5.82	71.45	8	0.52	0.546	0.174354	0.00314716	0.310639	0.141622	11.08	0.46	0.664	0.136	0.52	0.546	0.494	0.552	-0.59	-2.88	-0.94	-0.87	-1.02	-0.86	473974	192038	3.29838e+06	1.6281e+06	73.93	31.72	63.47	67.33	473974	1.35645e+06	369530	314494	184294
FALSE	High	Master Protein	TGGT1_290600-t26_1-p1	transcript=TGGT1_290600-t26_1 | gene=TGGT1_290600 | organism=Toxoplasma_gondii_GT1 | gene_product=succinyl-CoA-synthetase alpha SCSA | transcript_product=succinyl-CoA-synthetase alpha SCSA | location=TGGT1_chrIX:3568986-3572521(+) | protein_length=333 | sequence_SO=chromosome | SO=protein_coding	0	48.439	39	10	48	10	1	333	35.1	8.22	53.8	10	0.391	0.654					22.13	0.77	0.391	3.8	0.01	0.646	0.778	0.654	-1.35	1.93	-6.64	-0.63	-0.36	-0.61	63345.3	114472	2.90135e+06	2.17683e+06	88.4	43.06	78.59	73.65	213559	41255.7	63345.3	83587.4	156769
FALSE	High	Master Protein	TGGT1_213030-t26_1-p1	transcript=TGGT1_213030-t26_1 | gene=TGGT1_213030 | organism=Toxoplasma_gondii_GT1 | gene_product=hypothetical protein | transcript_product=hypothetical protein | location=TGGT1_chrV:673145-674534(+) | protein_length=324 | sequence_SO=chromosome | SO=protein_coding	0	48.344	30	7	31	7	1	324	35.2	4.69	43.41	7	0.074	0.987					2.96	10.69	0.549	0.01		0.987	1.654	0.914	-0.87	-6.64		-0.02	0.73	-0.13	54779.6	96173.4	836640	1.34991e+06	116.26		86.58	66.15	175306	17117.5		96173.4
FALSE	High	Master Protein	TGGT1_248880-t26_1-p1	transcript=TGGT1_248880-t26_1 | gene=TGGT1_248880 | organism=Toxoplasma_gondii_GT1 | gene_product=GTPase RAB7 | transcript_product=GTPase RAB7 | location=TGGT1_chrXII:4169929-4175109(-) | protein_length=432 | sequence_SO=chromosome | SO=protein_coding	0	47.649	21	7	75	7	1	432	47.8	9.67	68.79	7	16.36	1.144	0.0406514	0.798897	0.207322	0.842248	93.68	13.23	6.023	16.36	45.35	1.246	1.144	0.563	2.59	4.03	5.5	0.32	0.19	-0.83	93341.6	1.52706e+06	2.1415e+06	2.66924e+06	72.73	34.1	99.86	55.06	230289	93341.6	55571.7	1.38707e+06	1.52706e+06
FALSE	High	Master Protein	TGGT1_258870B-t26_1-p1	transcript=TGGT1_258870B-t26_1 | gene=TGGT1_258870B | organism=Toxoplasma_gondii_GT1 | gene_product=hypothetical protein | transcript_product=hypothetical protein | location=TGGT1_chrVIIb:3077592-3081353(-) | protein_length=472 | sequence_SO=chromosome | SO=protein_coding	0	47.621	23	7	37	3	1	472	52.1	10.02	38.2	7	0.01	0.533					0	2.57		0.01		0.501	0.533	0.795		-6.64		-1	-0.91	-0.33	8302.29		1.06661e+06	569001			73.69	98.13		8302.29
FALSE	High	Master Protein	TGGT1_262920-t26_1-p1	transcript=TGGT1_262920-t26_1 | gene=TGGT1_262920 | organism=Toxoplasma_gondii_GT1 | gene_product=trypsin domain-containing protein | transcript_product=trypsin domain-containing protein | location=TGGT1_chrVIIb:896939-905694(+) | protein_length=972 | sequence_SO=chromosome | SO=protein_coding	0	47.616	14	10	31	10	1	972	104.4	6.52	30.84	10	100	0.525					0	3.54	0.83	100	100	0.479	0.595	0.525	-0.27	6.64	6.64	-1.06	-0.75	-0.93	53462.5	44370.1	950233	565053		127.84	89.16	88	53462.5			44370.1	38875.7
FALSE	High	Master Protein	TGGT1_258660-t26_1-p1	transcript=TGGT1_258660-t26_1 | gene=TGGT1_258660 | organism=Toxoplasma_gondii_GT1 | gene_product=rhoptry protein ROP6 | transcript_product=rhoptry protein ROP6 | location=TGGT1_chrVIIb:3240488-3242940(-) | protein_length=480 | sequence_SO=chromosome | SO=protein_coding	0	47.198	14	4	51	4	1	480	51.3	4.03	46.5	4	0.672	0.802					65.86	3	1.411	0.672	0.01	0.713	0.802	0.827	0.5	-0.57	-6.64	-0.49	-0.32	-0.27	240774	200618	2.25476e+06	1.80803e+06	53.63	30.05	102.43	106.73	176442	240774	481151	248931	161683
FALSE	High	Master Protein	TGGT1_228210-t26_1-p1	transcript=TGGT1_228210-t26_1 | gene=TGGT1_228210 | organism=Toxoplasma_gondii_GT1 | gene_product=26S proteasome regulatory subunit | transcript_product=26S proteasome regulatory subunit | location=TGGT1_chrX:396289-402825(-) | protein_length=398 | sequence_SO=chromosome | SO=protein_coding	0	47.197	29	9	31	8	1	398	44.4	7.31	32.57	9	100	0.746					0	22.58	100	100		1.342	0.746	0.542	6.64	6.64		0.42	-0.42	-0.88		22781.6	1.08231e+06	832347		68.1	105.63	72.67				13476.8	38510.7
FALSE	High	Master Protein	TGGT1_294670-t26_1-p1	transcript=TGGT1_294670-t26_1 | gene=TGGT1_294670 | organism=Toxoplasma_gondii_GT1 | gene_product=translation initiation factor 3 subunit | transcript_product=translation initiation factor 3 subunit | location=TGGT1_chrIa:1039815-1044413(-) | protein_length=277 | sequence_SO=chromosome | SO=protein_coding	0	47.177	45	8	41	8	1	277	31.8	6.46	57.63	8	1.448	0.98	0.992638	0.605654	0.992638	0.680735	7.23	8.05	1.448	1.519	0.449	0.925	1.038	0.98	0.53	0.6	-1.16	-0.11	0.05	-0.03	327902	425346	2.21647e+06	2.30065e+06	23.73	40.29	81.49	81.17	327902	280003	441632	474950	425346
FALSE	High	Master Protein	TGGT1_226860-t26_1-p1	transcript=TGGT1_226860-t26_1 | gene=TGGT1_226860 | organism=Toxoplasma_gondii_GT1 | gene_product=SAG-related sequence SRS67 | transcript_product=SAG-related sequence SRS67 | location=TGGT1_chrX:1192695-1193327(-) | protein_length=210 | sequence_SO=chromosome | SO=protein_coding	0	47.102	57	8	20	8	1	210	23	8	30.03	8	0.331	0.842					15.73	1.35	0.01	0.331	0.734	0.784	0.853	0.842	-6.64	-1.6	-0.45	-0.35	-0.23	-0.25	52777.7	90627.4	826330	647453	150.43	131.3	115.59	116.96	9657.47	52777.7	641217		17459.2
FALSE	High	Master Protein	TGGT1_258390-t26_1-p1	transcript=TGGT1_258390-t26_1 | gene=TGGT1_258390 | organism=Toxoplasma_gondii_GT1 | gene_product=putative DnaJ protein | transcript_product=putative DnaJ protein | location=TGGT1_chrVIIb:3406355-3407941(-) | protein_length=397 | sequence_SO=chromosome | SO=protein_coding	0	46.868	29	9	19	9	1	397	44.6	6.93	22.9	9	0.01	0.283					0	6.24	0.01	0.01		0.439	0.283	0.134	-6.64	-6.64		-1.19	-1.82	-2.9	36638.2		961107	421621	90.83		114.72	62.68	17099.1	78504.5
FALSE	High	Master Protein	TGGT1_270240-t26_1-p1	transcript=TGGT1_270240-t26_1 | gene=TGGT1_270240 | organism=Toxoplasma_gondii_GT1 | gene_product=MAG1 protein | transcript_product=MAG1 protein | location=TGGT1_chrVIII:5310162-5311630(+) | protein_length=452 | sequence_SO=chromosome | SO=protein_coding	0	46.705	19	8	36	8	1	452	49.2	4.96	46.35	8	0.267	0.736	0.0462979	0.138808	0.213062	0.265886	3.17	5.5	0.188	0.484	0.267	0.736	0.786	0.424	-2.41	-1.05	-1.9	-0.44	-0.35	-1.24	369908	98944.3	2.18702e+06	1.71905e+06	25.7	21.09	100.77	66.88	394012	235175	369908	73929.1	113798
FALSE	High	Master Protein	TGGT1_309810-t26_1-p1	transcript=TGGT1_309810-t26_1 | gene=TGGT1_309810 | organism=Toxoplasma_gondii_GT1 | gene_product=ribosomal protein RPP2 | transcript_product=ribosomal protein RPP2 | location=TGGT1_chrXI:791021-791848(-) | protein_length=113 | sequence_SO=chromosome | SO=protein_coding	0	46.611	81	5	63	5	1	113	11.8	4.53	162.53	5	0.952	0.726	0.615063	0.0180855	0.684719	0.149741	29.14	5.79	1.158	0.952	0.7	0.782	0.726	0.672	0.21	-0.07	-0.51	-0.35	-0.46	-0.57	543929	613952	8.21473e+06	6.06131e+06	63.57	37.8	41.66	34.23	530111	543929	1.47102e+06	613952	517627
FALSE	High	Master Protein	TGGT1_311090-t26_1-p1	transcript=TGGT1_311090-t26_1 | gene=TGGT1_311090 | organism=Toxoplasma_gondii_GT1 | gene_product=ubiquitin carboxyl-terminal hydrolase | transcript_product=ubiquitin carboxyl-terminal hydrolase | location=TGGT1_chrXI:1762909-1768167(+) | protein_length=607 | sequence_SO=chromosome | SO=protein_coding	0	46.468	22	10	23	10	1	607	67.1	6.2	23.18	10	37.853	0.898					148.22	5.33	37.853	100	0.01	0.938	0.898	0.659	5.24	6.64	-6.64	-0.09	-0.16	-0.6	48331.8	267025	960530	862479	80.73	120.96	100.95	83.31	25261.7		92470.6	956240	74565.1
FALSE	High	Master Protein	TGGT1_304710-t26_1-p1	transcript=TGGT1_304710-t26_1 | gene=TGGT1_304710 | organism=Toxoplasma_gondii_GT1 | gene_product=putative eukaryotic peptide chain release factor | transcript_product=putative eukaryotic peptide chain release factor | location=TGGT1_chrVIIa:615815-622350(-) | protein_length=814 | sequence_SO=chromosome | SO=protein_coding	0	46.366	16	11	28	11	1	814	90	8.88	31.05	11	100	1.06					0	77.1	100	0.01	100	1.06	1.809	0.509	6.64	-6.64	6.64	0.08	0.86	-0.97	241278	55731.4	386164	666107		37.86	144.44	106.42		241278		73330.4
FALSE	High	Master Protein	TGGT1_269885B-t26_1-p1	transcript=TGGT1_269885B-t26_1 | gene=TGGT1_269885B | organism=Toxoplasma_gondii_GT1 | gene_product=rhoptry metalloprotease toxolysin TLN1 | transcript_product=rhoptry metalloprotease toxolysin TLN1 | location=TGGT1_chrVIII:5568343-5570523(+) | protein_length=558 | sequence_SO=chromosome | SO=protein_coding	0	46.234	18	9	38	4	1	558	62.3	7.96	26.21	9	4.787	1.11					1545.04	5.59	0.229	100		1.11	1.152	0.01	-2.13	6.64		0.15	0.2	-6.64	28364.1	18340.8	792135	885434		109.86	28.37	4.27	28364.1			6499.58	51755.1
FALSE	High	Master Protein	TGGT1_285980A-t26_1-p1	transcript=TGGT1_285980A-t26_1 | gene=TGGT1_285980A | organism=Toxoplasma_gondii_GT1 | gene_product=glucosephosphate-mutase GPM1 | transcript_product=glucosephosphate-mutase GPM1 | location=TGGT1_chrV:1947082-1953082(-) | protein_length=361 | sequence_SO=chromosome | SO=protein_coding	0	46.157	38	7	55	7	1	361	39.3	6.61	45.59	7	0.758	0.799	0.0575766	0.111027	0.230857	0.232648	7.67	3.75	0.867	0.69	0.758	0.799	0.831	0.575	-0.21	-0.54	-0.4	-0.32	-0.27	-0.8	123657	93739.7	2.78184e+06	2.31143e+06	26.11	37.35	94.38	74.02	158907	93509.2	123657	137714	64506
FALSE	High	Master Protein	TGGT1_312270-t26_1-p1	transcript=TGGT1_312270-t26_1 | gene=TGGT1_312270 | organism=Toxoplasma_gondii_GT1 | gene_product=rhoptry protein ROP13 | transcript_product=rhoptry protein ROP13 | location=TGGT1_chrXI:2519556-2520758(-) | protein_length=400 | sequence_SO=chromosome | SO=protein_coding	0	46.121	24	6	37	6	1	400	44.7	9.22	30.81	6	0.126	0.744					2.18	3.27	0.933	0.126	0.01	0.714	0.744	0.85	-0.1	-2.99	-6.64	-0.49	-0.43	-0.23	82594.6	30852	2.76737e+06	1.97567e+06	50.51	112.4	70.44	79.82	97794.4	82594.6	30205.4	91242.7	10432
FALSE	High	Master Protein	TGGT1_226030-t26_1-p1	transcript=TGGT1_226030-t26_1 | gene=TGGT1_226030 | organism=Toxoplasma_gondii_GT1 | gene_product=AGC kinase | transcript_product=AGC kinase | location=TGGT1_chrX:1762934-1764677(+) | protein_length=343 | sequence_SO=chromosome | SO=protein_coding	0	45.912	27	7	62	7	1	343	39.4	9.17	118.92	7	0.775	0.535	0.0128758	0.107879	0.117236	0.23158	2.58	13.29	0.775	0.827	0.752	0.535	0.703	0.286	-0.37	-0.27	-0.41	-0.9	-0.51	-1.81	5.80235e+06	4.79675e+06	3.26806e+06	2.27386e+06	74.11	70.29	64.3	27.47	4.18854e+06	5.80235e+06	1.60489e+07	3.24462e+06	4.79675e+06
FALSE	High	Master Protein	TGGT1_219750-t26_1-p1	transcript=TGGT1_219750-t26_1 | gene=TGGT1_219750 | organism=Toxoplasma_gondii_GT1 | gene_product=putative cytochrome c | transcript_product=putative cytochrome c | location=TGGT1_chrXII:601202-602193(-) | protein_length=115 | sequence_SO=chromosome | SO=protein_coding	0	45.732	59	7	48	7	1	115	12.4	9.19	54.77	7	0.075	0.774	0.0719227	0.203054	0.234756	0.334057	0.37	8.38	0.075	0.042	0.358	0.847	0.774	0.393	-3.74	-4.59	-1.48	-0.24	-0.37	-1.35	358309	52122.3	3.07934e+06	2.30322e+06	59.57	63.92	50.57	11.47	698454	358309	208239	52122.3	14870.6
FALSE	High	Master Protein	TGGT1_221670-t26_1-p1	transcript=TGGT1_221670-t26_1 | gene=TGGT1_221670 | organism=Toxoplasma_gondii_GT1 | gene_product=transcriptional elongation factor FACT140 | transcript_product=transcriptional elongation factor FACT140 | location=TGGT1_chrII:521099-534404(-) | protein_length=1198 | sequence_SO=chromosome | SO=protein_coding	0	45.618	13	10	17	10	1	1198	134.5	5.21	16.36	10	0.01	6.046					0	129.91	0.01	0.01	0.01	100	6.046	0.748	-6.64	-6.64	-6.64	6.64	2.6	-0.42	10259.5		161187	126389	112.08		136.95	119.19	8383.23	10259.5	60527.8
FALSE	High	Master Protein	TGGT1_292220-t26_1-p1	transcript=TGGT1_292220-t26_1 | gene=TGGT1_292220 | organism=Toxoplasma_gondii_GT1 | gene_product=PCI domain-containing protein | transcript_product=PCI domain-containing protein | location=TGGT1_chrIX:4423653-4430460(+) | protein_length=561 | sequence_SO=chromosome | SO=protein_coding	0	45.387	21	10	32	10	1	561	61.6	7.49	63.91	10		0.668						0.12				0.67	0.668	0.178				-0.58	-0.58	-2.49			393116	262791			141.41	84.1
FALSE	High	Master Protein	TGGT1_263060-t26_1-p1	transcript=TGGT1_263060-t26_1 | gene=TGGT1_263060 | organism=Toxoplasma_gondii_GT1 | gene_product=Proteasome/cyclosome repeat-containing protein | transcript_product=Proteasome/cyclosome repeat-containing protein | location=TGGT1_chrVIIb:808221-820240(-) | protein_length=988 | sequence_SO=chromosome | SO=protein_coding	0	45.141	14	7	15	7	1	988	107.1	5.25	24.04	7	0.01	1.019					0	0.44	0.01			1.022	1.019	0.624	-6.64			0.03	0.03	-0.68	5703.71		575560	588155			103.47	75.82	5703.71
FALSE	High	Master Protein	TGGT1_269180-t26_1-p1	transcript=TGGT1_269180-t26_1 | gene=TGGT1_269180 | organism=Toxoplasma_gondii_GT1 | gene_product=MIF4G domain-containing protein | transcript_product=MIF4G domain-containing protein | location=TGGT1_chrVIII:6008955-6021323(-) | protein_length=2668 | sequence_SO=chromosome | SO=protein_coding	0	45.1	10	15	22	15	1	2668	272.9	9.25	6.69	15	0.01	0.01					0	0		0.01	0.01	0.01	0.01	0.13		-6.64	-6.64	-6.64	-6.64	-2.94	304257		130717	436720	70.69		157.4			175691	526903
FALSE	High	Master Protein	TGGT1_229670-t26_1-p1	transcript=TGGT1_229670-t26_1 | gene=TGGT1_229670 | organism=Toxoplasma_gondii_GT1 | gene_product=ribosomal protein RPS23 | transcript_product=ribosomal protein RPS23 | location=TGGT1_chrVIII:368147-371053(+) | protein_length=143 | sequence_SO=chromosome | SO=protein_coding	0	45.048	43	6	83	6	1	143	15.8	10.83	83.37	6	0.658	0.811	0.234608	0.0303272	0.365599	0.161762	18.21	3.71	0.844	0.658	0.214	0.811	0.842	0.733	-0.24	-0.6	-2.23	-0.3	-0.25	-0.45	834986	502894	1.27765e+07	1.07531e+07	16.45	67.51	44.41	37.58	1.04355e+06	764822	834986	881124	502894
FALSE	High	Master Protein	TGGT1_231970-t26_1-p1	transcript=TGGT1_231970-t26_1 | gene=TGGT1_231970 | organism=Toxoplasma_gondii_GT1 | gene_product=pre-mRNA processing splicing factor PRP8 | transcript_product=pre-mRNA processing splicing factor PRP8 | location=TGGT1_chrVIII:1677402-1691932(+) | protein_length=2538 | sequence_SO=chromosome | SO=protein_coding	0	44.98	4	10	16	10	1	2538	291.6	9	18.58	10	0.151	0.392					1.59	4.58	0.222	0.01	0.151	0.392	0.313	0.935	-2.17	-6.64	-2.73	-1.35	-1.67	-0.1	156546	34286.5	760726	238307	57.35	50.59	71.8	122.55	224711	57788.4	156546	49848.6
FALSE	High	Master Protein	TGGT1_315610-t26_1-p1	transcript=TGGT1_315610-t26_1 | gene=TGGT1_315610 | organism=Toxoplasma_gondii_GT1 | gene_product=hypothetical protein | transcript_product=hypothetical protein | location=TGGT1_chrXI:4798811-4799287(+) | protein_length=158 | sequence_SO=chromosome | SO=protein_coding	0	44.816	24	3	57	3	1	158	16	11.78	109.99	3	0.339	0.744					15.17	5.34	0.641	0.339	0.01	0.744	0.858	0.695	-0.64	-1.56	-6.64	-0.43	-0.22	-0.52	231849	173682	3.88518e+06	3.33458e+06	68.27	93.24	61.07	52.58	598131	231849	176644	383293	78701
FALSE	High	Master Protein	TGGT1_214320-t26_1-p1	transcript=TGGT1_214320-t26_1 | gene=TGGT1_214320 | organism=Toxoplasma_gondii_GT1 | gene_product=facilitative glucose transporter GT1 | transcript_product=facilitative glucose transporter GT1 | location=TGGT1_chrX:6138702-6140408(+) | protein_length=568 | sequence_SO=chromosome | SO=protein_coding	0	44.748	10	5	57	5	1	568	61.6	6.93	77.88	5	5.487	1.112	0.429654	0.570607	0.532823	0.655796	27.66	33.06	6.511	0.4	5.487	1.112	1.36	0.862	2.7	-1.32	2.46	0.15	0.44	-0.21	96748.5	252644	2.64312e+06	3.59508e+06	112.86	67.22	51.46	31.03	96748.5	464967	46041.2	629940	185970
FALSE	High	Master Protein	TGGT1_273370-t26_1-p1	transcript=TGGT1_273370-t26_1 | gene=TGGT1_273370 | organism=Toxoplasma_gondii_GT1 | gene_product=putative coatomer gamma 2-subunit protein | transcript_product=putative coatomer gamma 2-subunit protein | location=TGGT1_chrVIII:3554530-3558659(-) | protein_length=1044 | sequence_SO=chromosome | SO=protein_coding	0	44.614	12	9	16	9	1	1044	112.2	5.35	23.03	9	0.01	0.425					0	7.07	0.01	0.01		0.313	1.063	0.425	-6.64	-6.64		-1.68	0.09	-1.23	119462		427778	454716	10.32		118.34	91.85	111038	128524
FALSE	High	Master Protein	TGGT1_305980-t26_1-p1	transcript=TGGT1_305980-t26_1 | gene=TGGT1_305980 | organism=Toxoplasma_gondii_GT1 | gene_product=pyruvate dehydrogenase complex subunit PDH-E3I | transcript_product=pyruvate dehydrogenase complex subunit PDH-E3I | location=TGGT1_chrIX:5486775-5490424(+) | protein_length=638 | sequence_SO=chromosome | SO=protein_coding	0	44.57	19	9	21	9	1	638	66.7	7.52	23.71	9	0.397	0.433					5.42	0.6	0.499	0.315		0.442	0.386	0.433	-1	-1.67		-1.18	-1.37	-1.21	13490.7	5349.94	1.00431e+06	387514	57.51	82	104.29	106.96	20772.2	8761.69		10373.4	2759.16
FALSE	High	Master Protein	TGGT1_262380-t26_1-p1	transcript=TGGT1_262380-t26_1 | gene=TGGT1_262380 | organism=Toxoplasma_gondii_GT1 | gene_product=putative elongation factor Tu | transcript_product=putative elongation factor Tu | location=TGGT1_chrVIIb:1291090-1294751(-) | protein_length=552 | sequence_SO=chromosome | SO=protein_coding	0	44.444	26	9	17	9	1	552	59.6	8.15	20.08	9	100	0.586					0	6.88	100	100	100	0.586	1.88	0.507	6.64	6.64	6.64	-0.77	0.91	-0.98		36026.7	475378	893684		42.98	127.74	86.55				34466.5	36026.7
FALSE	High	Master Protein	TGGT1_293360-t26_1-p1	transcript=TGGT1_293360-t26_1 | gene=TGGT1_293360 | organism=Toxoplasma_gondii_GT1 | gene_product=hypothetical protein | transcript_product=hypothetical protein | location=TGGT1_chrIa:262977-264056(-) | protein_length=243 | sequence_SO=chromosome | SO=protein_coding	0	44.44	60	7	19	7	1	243	26.7	4.46	17.59	7	0.01	0.57					0	0.66	0.01	0.01	0.01	0.562	0.605	0.57	-6.64	-6.64	-6.64	-0.83	-0.72	-0.81	121099		1.19098e+06	669882	80.37		99.3	98.18	121099	7332.4	141734
FALSE	High	Master Protein	TGGT1_216450-t26_1-p1	transcript=TGGT1_216450-t26_1 | gene=TGGT1_216450 | organism=Toxoplasma_gondii_GT1 | gene_product=peptidase, T1 family protein | transcript_product=peptidase, T1 family protein | location=TGGT1_chrXI:6058951-6061605(+) | protein_length=260 | sequence_SO=chromosome | SO=protein_coding	0	44.323	27	7	62	7	1	260	27.9	5.2	59.31	7	0.592	0.673	0.294818	0.25372	0.418989	0.380581	36.7	3.23	1.01	0.592	0.144	1.069	0.673	0.64	0.01	-0.76	-2.8	0.1	-0.57	-0.64	287551	170191	4.40109e+06	2.95982e+06	33.01	88.75	51.64	32.04	336283	287551	167200	339698	170191
FALSE	High	Master Protein	TGGT1_274060-t26_1-p1	transcript=TGGT1_274060-t26_1 | gene=TGGT1_274060 | organism=Toxoplasma_gondii_GT1 | gene_product=2-oxoglutarate/malate translocase OMT | transcript_product=2-oxoglutarate/malate translocase OMT | location=TGGT1_chrVIII:3043521-3046134(+) | protein_length=323 | sequence_SO=chromosome | SO=protein_coding	0	44.31	39	11	29	11	1	323	35	9.77	27.06	11	1.829	0.757	0.269855	0.0104947	0.398855	0.149741	27.89	2.74	1.485	1.829	30.41	0.781	0.705	0.757	0.57	0.87	4.93	-0.36	-0.5	-0.4	91400.4	215849	1.6151e+06	1.13905e+06	71.86	60.53	90.93	92.36	91400.4	118015	14653.2	135718	215849
FALSE	High	Master Protein	TGGT1_209910-t26_1-p1	transcript=TGGT1_209910-t26_1 | gene=TGGT1_209910 | organism=Toxoplasma_gondii_GT1 | gene_product=histone H2Bv | transcript_product=histone H2Bv | location=TGGT1_chrIb:1562803-1563174(+) | protein_length=123 | sequence_SO=chromosome | SO=protein_coding	0	44.23	47	6	132	5	1	123	13.7	10.55	93.62	6	0.01	0.4					0	5.47	0.01	0.01	0.02	0.307	0.4	0.702	-6.64	-6.64	-5.68	-1.7	-1.32	-0.51	1.60387e+06	15032	1.14282e+07	3.51107e+06	50.64	88.62	91.97	125.71	1.66055e+06	525335	1.60387e+06	7201.98
FALSE	High	Master Protein	TGGT1_261250-t26_1-p1	transcript=TGGT1_261250-t26_1 | gene=TGGT1_261250 | organism=Toxoplasma_gondii_GT1 | gene_product=histone H2A1 | transcript_product=histone H2A1 | location=TGGT1_chrVIIb:1779724-1780266(-) | protein_length=180 | sequence_SO=chromosome | SO=protein_coding	0	44.166	22	3	203	1	1	180	19.5	10.2	366.07	3	0.605	0.647	0.124199	0.0158444	0.278904	0.149741	0.71	2.7	0.605	0.922	0.597	0.619	0.736	0.647	-0.72	-0.12	-0.74	-0.69	-0.44	-0.63	589588	356727	28750905	2.1165e+07	68.77	55.55	93.28	90.63	589588	264398	1.18672e+06	356727	243848
FALSE	High	Master Protein	TGGT1_265330-t26_1-p1	transcript=TGGT1_265330-t26_1 | gene=TGGT1_265330 | organism=Toxoplasma_gondii_GT1 | gene_product=putative cell-cycle-associated protein kinase GSK | transcript_product=putative cell-cycle-associated protein kinase GSK | location=TGGT1_chrIX:1430680-1432489(-) | protein_length=394 | sequence_SO=chromosome | SO=protein_coding	0	44.089	30	8	30	8	1	394	44.4	8.32	43.68	8	0.056	0.531					0.38	2.5	0.162	0.056	0.01	0.531	0.34	0.563	-2.62	-4.16	-6.64	-0.91	-1.55	-0.83	193822	18613.4	3.3348e+06	1.1352e+06	11.37	69.68	70.65	87.85	196743	193822	159262	31928.5	10851.1
FALSE	High	Master Protein	TGGT1_258470-t26_1-p1	transcript=TGGT1_258470-t26_1 | gene=TGGT1_258470 | organism=Toxoplasma_gondii_GT1 | gene_product=hypothetical protein | transcript_product=hypothetical protein | location=TGGT1_chrVIIb:3369823-3371292(+) | protein_length=284 | sequence_SO=chromosome | SO=protein_coding	0	43.832	31	7	33	7	1	284	31.7	7.8	33.8	7	3.789	1.093					120.47	37.73	3.789	0.71	100	1.372	1.093	0.618	1.92	-0.49	6.64	0.46	0.13	-0.7	46415.1	204693	1.53392e+06	1.67733e+06	21.32	133.25	107.91	76.25	54028	39874.9		204693	28319.6
FALSE	High	Master Protein	TGGT1_289830-t26_1-p1	transcript=TGGT1_289830-t26_1 | gene=TGGT1_289830 | organism=Toxoplasma_gondii_GT1 | gene_product=putative eukaryotic initiation factor-3, delta subunit | transcript_product=putative eukaryotic initiation factor-3, delta subunit | location=TGGT1_chrIX:3281722-3286956(+) | protein_length=335 | sequence_SO=chromosome | SO=protein_coding	0	43.795	49	11	39	11	1	335	37.7	5.69	27.76	11	1.321	0.74	0.596938	0.856586	0.670939	0.887023	28.72	14.13	0.737	1.577	1.321	0.74	0.611	1.802	-0.44	0.66	0.4	-0.43	-0.71	0.85	1.12883e+06	1.16775e+06	2.1855e+06	1.33531e+06	68.92	81.15	53.39	107.18	1.12883e+06	740504	2.73607e+06	832267	1.16775e+06
FALSE	High	Master Protein	TGGT1_215590-t26_1-p1	transcript=TGGT1_215590-t26_1 | gene=TGGT1_215590 | organism=Toxoplasma_gondii_GT1 | gene_product=flavoprotein subunit of succinate dehydrogenase | transcript_product=flavoprotein subunit of succinate dehydrogenase | location=TGGT1_chrX:6924001-6933881(-) | protein_length=669 | sequence_SO=chromosome | SO=protein_coding	0	43.664	17	10	29	10	1	669	72.7	8.19	27.01	10	0.439	0.647					27.93	9.22	0.439	0.01	100	0.551	0.647	1.014	-1.19	-6.64	6.64	-0.86	-0.63	0.02	114051	73207	1.64097e+06	1.06215e+06	57.15	6.9	56.31	88.51	175078	74295.8		76872.6
FALSE	High	Master Protein	TGGT1_306650-t26_1-p1	transcript=TGGT1_306650-t26_1 | gene=TGGT1_306650 | organism=Toxoplasma_gondii_GT1 | gene_product=hypothetical protein | transcript_product=hypothetical protein | location=TGGT1_chrIX:6020484-6022587(-) | protein_length=286 | sequence_SO=chromosome | SO=protein_coding	0	43.402	25	5	39	5	1	286	31.4	7.25	39.64	5	0.815	1.035					86.35	3.19	0.815	100	0.1	1.035	1.057	0.754	-0.3	6.64	-3.32	0.05	0.08	-0.41	88822.7	18901.2	1.80114e+06	1.90422e+06	50.11	123.99	67.59	46.99	128641		61329.1	104818	18901.2
FALSE	High	Master Protein	TGGT1_258410-t26_1-p1	transcript=TGGT1_258410-t26_1 | gene=TGGT1_258410 | organism=Toxoplasma_gondii_GT1 | gene_product=photosensitized INA-labeled protein PHIL1 | transcript_product=photosensitized INA-labeled protein PHIL1 | location=TGGT1_chrVIIb:3400417-3400914(+) | protein_length=165 | sequence_SO=chromosome | SO=protein_coding	0	43.324	64	6	56	6	1	165	18.8	6.33	61.56	6	0.717	0.669	0.0751287	0.475758	0.239277	0.584666	8.75	37.5	0.635	0.717	0.866	0.669	1.495	0.291	-0.66	-0.48	-0.21	-0.58	0.58	-1.78	345226	247618	4.37823e+06	2.38787e+06	34.38	20.79	59.81	76.26	430231	345226	207142	273170	247618
FALSE	High	Master Protein	TGGT1_408800-t26_1-p1	transcript=TGGT1_408800-t26_1 | gene=TGGT1_408800 | organism=Toxoplasma_gondii_GT1 | gene_product=NTPase | transcript_product=NTPase | location=TGGT1_chrXII:6592331-6592894(+) | protein_length=188 | sequence_SO=chromosome | SO=protein_coding	0	43.082	29	6	75	2	1	188	20.9	6.92	106.74	6	0.444	0.957	0.183319	0.666634	0.315587	0.735099	6.15	17.24	0.985	0.444	0.351	0.957	1.107	0.835	-0.02	-1.17	-1.51	-0.06	0.15	-0.26	194333	86312.7	2.94262e+06	3.25869e+06	63.76	113.52	55.78	44.37	473454	194333	152757	466192	86312.7
FALSE	High	Master Protein	TGGT1_306930-t26_1-p1	transcript=TGGT1_306930-t26_1 | gene=TGGT1_306930 | organism=Toxoplasma_gondii_GT1 | gene_product=putative proteasome subunit beta type 7 precursor | transcript_product=putative proteasome subunit beta type 7 precursor | location=TGGT1_chrXI:157291-160542(-) | protein_length=368 | sequence_SO=chromosome | SO=protein_coding	0	43.072	23	7	44	7	1	368	39.5	8.4	26.12	7	5.096	0.728	0.000273389	0.23447	0.0534113	0.362685	4.76	6.54	5.096	5.41	4.932	0.224	0.788	0.728	2.35	2.44	2.3	-2.16	-0.34	-0.46	230067	1.24476e+06	2.57565e+06	2.03019e+06	23.98	23.79	64.93	90.44	329208	230067	215390	1.67768e+06	1.24476e+06
FALSE	High	Master Protein	TGGT1_251680-t26_1-p1	transcript=TGGT1_251680-t26_1 | gene=TGGT1_251680 | organism=Toxoplasma_gondii_GT1 | gene_product=putative histamine-releasing factor | transcript_product=putative histamine-releasing factor | location=TGGT1_chrXII:5449838-5451669(-) | protein_length=171 | sequence_SO=chromosome | SO=protein_coding	0	43.06	54	5	50	5	1	171	19.2	4.69	40.66	5	0.736	0.846	0.0380587	0.660267	0.206657	0.730051	5.93	5.8	0.63	0.736	0.79	0.799	1.212	0.846	-0.67	-0.44	-0.34	-0.32	0.28	-0.24	1.05759e+06	665786	4.25234e+06	5.15249e+06	78.39	86.84	31.66	28.6	1.05759e+06	310996	2.12942e+06	665786	228940
FALSE	High	Master Protein	TGGT1_270380-t26_1-p1	transcript=TGGT1_270380-t26_1 | gene=TGGT1_270380 | organism=Toxoplasma_gondii_GT1 | gene_product=ribosomal protein RPS13 | transcript_product=ribosomal protein RPS13 | location=TGGT1_chrVIII:5238468-5240728(-) | protein_length=151 | sequence_SO=chromosome | SO=protein_coding	0	42.945	34	6	88	6	1	151	17.2	10.55	81.65	6	0.972	0.837	0.389553	0.0675693	0.50138	0.185022	5.43	0.41	0.972	1.009	0.734	0.837	0.938	0.834	-0.04	0.01	-0.45	-0.26	-0.09	-0.26	894503	799825	1.0628e+07	9.97016e+06	7.82	12.51	43.87	41.46	894503	792350	921222	869223	799825
FALSE	High	Master Protein	TGGT1_249590-t26_1-p1	transcript=TGGT1_249590-t26_1 | gene=TGGT1_249590 | organism=Toxoplasma_gondii_GT1 | gene_product=putative proteasome subunit alpha type 5-2 | transcript_product=putative proteasome subunit alpha type 5-2 | location=TGGT1_chrXII:4602436-4606174(+) | protein_length=258 | sequence_SO=chromosome | SO=protein_coding	0	42.848	33	7	69	7	1	258	28.3	5.08	74.15	7	1.251	0.707	0.74655	0.0839058	0.799455	0.202256	77.83	1.07	0.595	1.986	1.251	0.707	0.717	0.451	-0.75	0.99	0.32	-0.5	-0.48	-1.15	272141	340576	3.44655e+06	2.42321e+06	97.87	41.89	29.67	4.49	955822	127824	272141	568261	253895
FALSE	High	Master Protein	TGGT1_286590-t26_1-p1	transcript=TGGT1_286590-t26_1 | gene=TGGT1_286590 | organism=Toxoplasma_gondii_GT1 | gene_product=microtubule associated protein SPM2 | transcript_product=microtubule associated protein SPM2 | location=TGGT1_chrV:1625039-1626577(+) | protein_length=357 | sequence_SO=chromosome | SO=protein_coding	0	42.795	28	8	43	8	1	357	39.6	9.92	54.11	8	0.771	0.639	0.010141	0.0770275	0.111942	0.198089	2.06	7.8	0.819	0.753	0.771	0.557	0.639	0.836	-0.29	-0.41	-0.38	-0.84	-0.65	-0.26	1.07327e+06	808101	1.24382e+06	693007	70.87	69.88	74.09	93.81	633118	1.07327e+06	2.55455e+06	518682	808101
FALSE	High	Master Protein	TGGT1_205320-t26_1-p1	transcript=TGGT1_205320-t26_1 | gene=TGGT1_205320 | organism=Toxoplasma_gondii_GT1 | gene_product=hypothetical protein | transcript_product=hypothetical protein | location=TGGT1_chrVIIa:1385667-1389087(+) | protein_length=739 | sequence_SO=chromosome | SO=protein_coding	0	42.705	32	9	78	9	1	739	80	5.48	112.04	9	1.605	0.251	0.107554	0.0971012	0.270876	0.214147	24.43	3.39	1.341	1.605	2.698	0.251	0.159	0.643	0.42	0.68	1.43	-2	-2.65	-0.64	4.40252e+06	7.98736e+06	1.88332e+06	312074	21.39	22.85	34.37	102.45	5.95686e+06	4.40252e+06	4.0216e+06	7.98736e+06	7.06761e+06
FALSE	High	Master Protein	TGGT1_247350-t26_1-p1	transcript=TGGT1_247350-t26_1 | gene=TGGT1_247350 | organism=Toxoplasma_gondii_GT1 | gene_product=thioredoxin domain-containing protein | transcript_product=thioredoxin domain-containing protein | location=TGGT1_chrXII:3207736-3209852(-) | protein_length=312 | sequence_SO=chromosome | SO=protein_coding	0	42.7	22	5	86	5	1	312	33.7	9.1	172.49	5	1.129	0.723	0.970283	0.0500049	0.975062	0.169203	83.16	4.21	0.496	1.129	1.875	0.723	0.762	0.569	-1.01	0.18	0.91	-0.47	-0.39	-0.81	552771	621865	9.18675e+06	7.00053e+06	75.66	16.76	82	65.77	1.25387e+06	552771	244424	621865	624344
FALSE	High	Master Protein	TGGT1_318410-t26_1-p1	transcript=TGGT1_318410-t26_1 | gene=TGGT1_318410 | organism=Toxoplasma_gondii_GT1 | gene_product=putative TCP-1 chaperonin | transcript_product=putative TCP-1 chaperonin | location=TGGT1_chrIV:1295296-1300413(+) | protein_length=537 | sequence_SO=chromosome | SO=protein_coding	0	42.525	25	10	23	10	1	537	58.6	7.08	24.93	10	0.44	0.489					9.04	3.12	0.578	0.44	0.01	0.489	0.446	0.557	-0.79	-1.18	-6.64	-1.03	-1.16	-0.85	128247	67982	2.68606e+06	1.19837e+06	7.87	26.05	63.24	73.32	141589	128247	121407	81908.7	56423.2
FALSE	High	Master Protein	TGGT1_320570-t26_1-p1	transcript=TGGT1_320570-t26_1 | gene=TGGT1_320570 | organism=Toxoplasma_gondii_GT1 | gene_product=putative elongation factor Tu | transcript_product=putative elongation factor Tu | location=TGGT1_chrIV:197431-203338(+) | protein_length=586 | sequence_SO=chromosome | SO=protein_coding	0	42.294	26	10	26	10	1	586	63.5	6.05	25.41	10	0.01	0.443					0	2.39	0.01			0.52	0.443	0.407	-6.64			-0.94	-1.17	-1.3	45142.1		1.05239e+06	513861			110.63	102.39	45142.1
FALSE	High	Master Protein	TGGT1_248700-t26_1-p1	transcript=TGGT1_248700-t26_1 | gene=TGGT1_248700 | organism=Toxoplasma_gondii_GT1 | gene_product=alveolin domain containing intermediate filament IMC12 | transcript_product=alveolin domain containing intermediate filament IMC12 | location=TGGT1_chrXII:4033434-4035280(+) | protein_length=277 | sequence_SO=chromosome | SO=protein_coding	0	42.008	27	6	46	6	1	277	29.8	5.34	50.49	6	0.622	0.711	0.0861142	0.159942	0.258509	0.285347	10.7	1.81	0.505	0.622	0.824	0.728	0.711	0.314	-0.98	-0.69	-0.28	-0.46	-0.49	-1.67	230829	156518	3.39319e+06	2.41176e+06	13.85	32.18	92.58	44.18	190630	251811	230829	96351.1	156518
FALSE	High	Master Protein	TGGT1_239490-t26_1-p1	transcript=TGGT1_239490-t26_1 | gene=TGGT1_239490 | organism=Toxoplasma_gondii_GT1 | gene_product=dehydrogenase E1 component family protein | transcript_product=dehydrogenase E1 component family protein | location=TGGT1_chrVI:705091-710904(-) | protein_length=571 | sequence_SO=chromosome | SO=protein_coding	0	41.597	24	9	30	9	1	571	63.9	8.46	36.31	9	0.037	0.93					0.15	92.43	0.01	0.037	1.713	0.93	1.6	0.147	-6.64	-4.75	0.78	-0.11	0.68	-2.77	86470.4	13871.2	1.62941e+06	1.51473e+06	70.55	126.96	69.39	51.75	171141	86470.4	34891.6		3219.78
FALSE	High	Master Protein	TGGT1_209160-t26_1-p1	transcript=TGGT1_209160-t26_1 | gene=TGGT1_209160 | organism=Toxoplasma_gondii_GT1 | gene_product=myristoyl CoA:protein N-myristoyltransferase | transcript_product=myristoyl CoA:protein N-myristoyltransferase | location=TGGT1_chrIb:1097244-1105321(-) | protein_length=463 | sequence_SO=chromosome | SO=protein_coding	0	41.396	21	7	30	7	1	463	52.3	7.3	27.56	7	0.01	0.93					0	0.62	0.01	0.01		0.93	0.935	0.713	-6.64	-6.64		-0.1	-0.1	-0.49	34802.8		2.01939e+06	1.88781e+06	96.03		53.29	37.34	79599.5	15216.6
FALSE	High	Master Protein	TGGT1_246540-t26_1-p1	transcript=TGGT1_246540-t26_1 | gene=TGGT1_246540 | organism=Toxoplasma_gondii_GT1 | gene_product=cytochrome c1, heme protein | transcript_product=cytochrome c1, heme protein | location=TGGT1_chrXII:2770945-2774311(+) | protein_length=398 | sequence_SO=chromosome | SO=protein_coding	0	41.267	30	9	28	9	1	398	45.9	8.24	32.16	9	1.072	1.018	0.585964	0.889926	0.662252	0.914584	54.88	23.56	1.072	1.468	0.18	1.18	1.018	0.788	0.1	0.55	-2.47	0.24	0.03	-0.34	366532	376402	1.63985e+06	1.66946e+06	37.86	57.05	95.41	77.96	366532	256361	549179	392774	376402
FALSE	High	Master Protein	TGGT1_237140-t26_1-p1	transcript=TGGT1_237140-t26_1 | gene=TGGT1_237140 | organism=Toxoplasma_gondii_GT1 | gene_product=putative ethylene inducible protein | transcript_product=putative ethylene inducible protein | location=TGGT1_chrX:5625979-5630291(+) | protein_length=307 | sequence_SO=chromosome | SO=protein_coding	0	41.266	26	6	16	6	1	307	32.7	5.74	21.79	6	1.966	0.955					146.38	44.06	100	0.025	1.966	1.266	0.955	0.306	6.64	-5.32	0.98	0.34	-0.07	-1.71	89835.6	42409.2	661371	631894	106.92	79.14	127.68	63.03		241024	33484	42409.2	6013.98
FALSE	High	Master Protein	TGGT1_319340-t26_1-p1	transcript=TGGT1_319340-t26_1 | gene=TGGT1_319340 | organism=Toxoplasma_gondii_GT1 | gene_product=hypothetical protein | transcript_product=hypothetical protein | location=TGGT1_chrIV:962742-964670(+) | protein_length=481 | sequence_SO=chromosome | SO=protein_coding	0	41.237	22	8	20	8	1	481	52.4	5.87	23.02	8	0.254	0.83					1.32	16.16	0.254	0.219	100	0.83	1.27	0.698	-1.98	-2.19	6.64	-0.27	0.35	-0.52	335384	63314.8	2.14128e+06	2.72e+06	40.55	37.69	50.85	35.74	249708	450457		63314.8	98440.6
FALSE	High	Master Protein	TGGT1_261580-t26_1-p1	transcript=TGGT1_261580-t26_1 | gene=TGGT1_261580 | organism=Toxoplasma_gondii_GT1 | gene_product=histone H2AX | transcript_product=histone H2AX | location=TGGT1_chrVIIb:1624096-1624503(-) | protein_length=135 | sequence_SO=chromosome | SO=protein_coding	0	41.215	29	3	144	2	1	135	14.5	10.56	202.16	3	0.667	0.735	0.0342921	0.0302556	0.200625	0.161762	7.08	6.24	0.772	0.667	0.596	0.735	0.815	0.678	-0.37	-0.58	-0.75	-0.44	-0.29	-0.56	373824	255302	9.99736e+06	8.15037e+06	23.7	24.16	95.04	87.38	373824	263389	428684	288420	175710
FALSE	High	Master Protein	TGGT1_211260-t26_1-p1	transcript=TGGT1_211260-t26_1 | gene=TGGT1_211260 | organism=Toxoplasma_gondii_GT1 | gene_product=rhoptry kinase family protein ROP26 (incomplete catalytic triad) | transcript_product=rhoptry kinase family protein ROP26 (incomplete catalytic triad) | location=TGGT1_chrIV:1816280-1817587(-) | protein_length=435 | sequence_SO=chromosome | SO=protein_coding	0	41.175	27	7	26	7	1	435	47.8	9.19	20.03	7	0.909	1.028					2.43	6.52	0.927	0.909	0.01	1.202	0.983	1.028	-0.11	-0.14	-6.64	0.27	-0.03	0.04	124588	68403.8	1.08575e+06	1.0669e+06	63.07	67.93	82.71	79.95	124588	44608.2	199671	115446	40530.3
FALSE	High	Master Protein	TGGT1_272660-t26_1-p1	transcript=TGGT1_272660-t26_1 | gene=TGGT1_272660 | organism=Toxoplasma_gondii_GT1 | gene_product=hypothetical protein | transcript_product=hypothetical protein | location=TGGT1_chrVIII:3808733-3810272(+) | protein_length=258 | sequence_SO=chromosome | SO=protein_coding	0	41.126	33	7	50	7	1	258	28	6.43	50.1	7	0.606	0.751					10.29	3.28	0.606	0.72	0.01	0.781	0.716	0.751	-0.72	-0.47	-6.64	-0.36	-0.48	-0.41	139444	149363	2.27963e+06	1.78019e+06	72.69	53.37	50.38	50.76	366888	139444	95241.2	222158	100422
FALSE	High	Master Protein	TGGT1_259630-t26_1-p1	transcript=TGGT1_259630-t26_1 | gene=TGGT1_259630 | organism=Toxoplasma_gondii_GT1 | gene_product=hypothetical protein | transcript_product=hypothetical protein | location=TGGT1_chrVIIb:2722823-2724032(+) | protein_length=160 | sequence_SO=chromosome | SO=protein_coding	0	41.094	28	3	73	3	1	160	18.3	5.1	109.6	3	8.196	0.859	0.00231037	0.947729	0.0712992	0.961874	4.02	11.82	11.091	8.196	7.974	0.859	1.6	0.766	3.47	3.04	3	-0.22	0.68	-0.38	142329	1.57863e+06	1.00502e+06	849238	34.8	29.16	16.32	47.01	142329	121257	229085	1.57863e+06	993880
FALSE	High	Master Protein	TGGT1_309760-t26_1-p1	transcript=TGGT1_309760-t26_1 | gene=TGGT1_309760 | organism=Toxoplasma_gondii_GT1 | gene_product=hypothetical protein | transcript_product=hypothetical protein | location=TGGT1_chrXI:754191-755138(-) | protein_length=315 | sequence_SO=chromosome | SO=protein_coding	0	41.071	26	6	14	6	1	315	34.5	9.64	23.23	6	9.351	0.865					148.1	2.72	9.351	100	0.01	0.865	0.843	0.902	3.23	6.64	-6.64	-0.21	-0.25	-0.15	15336.4	24080	1.01853e+06	880732	110.99	87.81	77.92	81.16	5324.89		44170.7	49791.3	11645.6
FALSE	High	Master Protein	TGGT1_214770-t26_1-p1	transcript=TGGT1_214770-t26_1 | gene=TGGT1_214770 | organism=Toxoplasma_gondii_GT1 | gene_product=putative small GTP binding protein rab1a | transcript_product=putative small GTP binding protein rab1a | location=TGGT1_chrX:6376684-6380380(+) | protein_length=202 | sequence_SO=chromosome | SO=protein_coding	0	40.818	39	7	52	6	1	202	22.9	7.72	32.33	7	0.797	0.677					48.09	0.74	0.797	1.204	0.01	0.677	0.828	0.67	-0.33	0.27	-6.64	-0.56	-0.27	-0.58	129296	186364	4.00213e+06	2.70977e+06	90.21	79.98	53.07	45.54	443884	81538.6	129296	353779	98172.9
FALSE	High	Master Protein	TGGT1_261010-t26_1-p1	transcript=TGGT1_261010-t26_1 | gene=TGGT1_261010 | organism=Toxoplasma_gondii_GT1 | gene_product=putative tat-binding family protein | transcript_product=putative tat-binding family protein | location=TGGT1_chrVIIb:1947162-1952503(-) | protein_length=409 | sequence_SO=chromosome | SO=protein_coding	0	40.769	29	9	29	8	1	409	46	7.77	30.85	9	100	0.625					0	7.97	100			0.539	0.843	0.625	6.64			-0.89	-0.25	-0.68		46153	349699	258951			132.59	129.61				46153
FALSE	High	Master Protein	TGGT1_304770-t26_1-p1	transcript=TGGT1_304770-t26_1 | gene=TGGT1_304770 | organism=Toxoplasma_gondii_GT1 | gene_product=ubiquitin-conjugating enzyme subfamily protein | transcript_product=ubiquitin-conjugating enzyme subfamily protein | location=TGGT1_chrVIIa:677672-680044(-) | protein_length=155 | sequence_SO=chromosome | SO=protein_coding	0	40.629	53	6	23	6	1	155	17.6	5.9	24.14	6	100	1.187					0	17.32	100	100	0.01	1.97	1.187	1.048	6.64	6.64	-6.64	0.98	0.25	0.07	3.32709e+06	22403.8	410125	486799		124.77	142.33	131.99			3.32709e+06	2644.08	103609
FALSE	High	Master Protein	TGGT1_220500-t26_1-p1	transcript=TGGT1_220500-t26_1 | gene=TGGT1_220500 | organism=Toxoplasma_gondii_GT1 | gene_product=UBX domain-containing protein | transcript_product=UBX domain-containing protein | location=TGGT1_chrV:321412-325538(+) | protein_length=387 | sequence_SO=chromosome | SO=protein_coding	0	40.526	28	8	26	8	1	387	43.1	8.56	26.28	8	0.661	0.84					18.62	6.63	0.851	0.661	0.01	0.893	0.84	0.77	-0.23	-0.6	-6.64	-0.16	-0.25	-0.38	149608	117191	1.50506e+06	1.26431e+06	20.89	11.66	77	69.87	149608	163316	107199	127287	107896
FALSE	High	Master Protein	TGGT1_284540-t26_1-p1	transcript=TGGT1_284540-t26_1 | gene=TGGT1_284540 | organism=Toxoplasma_gondii_GT1 | gene_product=ATP synthase F1, delta subunit protein | transcript_product=ATP synthase F1, delta subunit protein | location=TGGT1_chrV:2579034-2580826(-) | protein_length=252 | sequence_SO=chromosome | SO=protein_coding	0	40.495	27	6	48	6	1	252	27.6	10.17	44.7	6	0.418	0.725					1.65	5.56	0.418	0.444	0.01	0.777	0.725	0.567	-1.26	-1.17	-6.64	-0.36	-0.46	-0.82	141624	62499.7	2.48105e+06	1.91611e+06	78.44	7.78	58.64	40.52	141624	148626	9502.34	59150.3	66038.8
FALSE	High	Master Protein	TGGT1_206590-t26_1-p1	transcript=TGGT1_206590-t26_1 | gene=TGGT1_206590 | organism=Toxoplasma_gondii_GT1 | gene_product=calcium-dependent protein kinase CDPK2A | transcript_product=calcium-dependent protein kinase CDPK2A | location=TGGT1_chrVIIa:775466-782202(-) | protein_length=786 | sequence_SO=chromosome | SO=protein_coding	0	40.41	16	10	30	10	1	786	86.3	8.76	20.21	10	0.388	0.962	0.00307138	0.408908	0.0737131	0.526292	1.92	7.91	0.351	0.388	0.422	1.018	0.962	0.434	-1.51	-1.37	-1.25	0.03	-0.06	-1.2	521762	183226	870962	838056	43.14	49.31	74.81	25.06	521762	284102	723369	183226	110296
FALSE	High	Master Protein	TGGT1_312150-t26_1-p1	transcript=TGGT1_312150-t26_1 | gene=TGGT1_312150 | organism=Toxoplasma_gondii_GT1 | gene_product=hypothetical protein | transcript_product=hypothetical protein | location=TGGT1_chrXI:2422714-2426663(+) | protein_length=567 | sequence_SO=chromosome | SO=protein_coding	0	40.405	20	8	35	8	1	567	60.6	6.9	37.55	8	0.036	0.63					0.14	33.73	0.107	0.036	0.01	0.63	0.235	0.991	-3.23	-4.78	-6.64	-0.67	-2.09	-0.01	1.05629e+06	59413.1	5.77695e+06	1.35798e+06	20.68	80.01	56.1	100.87	1.05629e+06	861813	1.30498e+06	112814	31289.7
FALSE	High	Master Protein	TGGT1_233450-t26_1-p1	transcript=TGGT1_233450-t26_1 | gene=TGGT1_233450 | organism=Toxoplasma_gondii_GT1 | gene_product=SAG-related sequence SRS29A | transcript_product=SAG-related sequence SRS29A | location=TGGT1_chrVIII:2656903-2658165(+) | protein_length=420 | sequence_SO=chromosome | SO=protein_coding	0	40.392	27	6	40	6	1	420	44.2	7.27	37.81	6	0.375	0.575	0.0957373	0.262968	0.269679	0.391573	0.47	21.44	0.781	0.366	0.375	0.575	0.323	1.077	-0.36	-1.45	-1.42	-0.8	-1.63	0.11	174515	77113.2	2.95774e+06	1.10145e+06	19.12	47.8	43.68	97.82	174515	210594	143304	136239	77113.2
FALSE	High	Master Protein	TGGT1_297810-t26_1-p1	transcript=TGGT1_297810-t26_1 | gene=TGGT1_297810 | organism=Toxoplasma_gondii_GT1 | gene_product=hypothetical protein | transcript_product=hypothetical protein | location=TGGT1_chrII:2012516-2015258(-) | protein_length=266 | sequence_SO=chromosome | SO=protein_coding	0	40.292	38	7	29	7	1	266	29.6	6.54	37.97	7	0.282	0.613					38.89	11.99	1.902	0.042		0.841	0.481	0.613	0.93	-4.58		-0.25	-1.06	-0.71	65349.6	18436.2	2.42154e+06	1.16432e+06	12.9	134.14	93.27	92.66	59639.2	71606.8		113414	2996.94
FALSE	High	Master Protein	TGGT1_232660-t26_1-p1	transcript=TGGT1_232660-t26_1 | gene=TGGT1_232660 | organism=Toxoplasma_gondii_GT1 | gene_product=Hsp70 interacting protein HIP | transcript_product=Hsp70 interacting protein HIP | location=TGGT1_chrVIII:2206171-2208838(-) | protein_length=425 | sequence_SO=chromosome | SO=protein_coding	0	40.201	24	7	26	7	1	425	45.2	5.31	25.88	7	0.01	0.572					0	8.63	0.01	0.01	0.01	0.674	0.572	0.41	-6.64	-6.64	-6.64	-0.57	-0.81	-1.29	94363.5		2.00174e+06	1.14532e+06	53.12		96.08	72.7	94363.5	92342	217207
FALSE	High	Master Protein	TGGT1_227280-t26_1-p1	transcript=TGGT1_227280-t26_1 | gene=TGGT1_227280 | organism=Toxoplasma_gondii_GT1 | gene_product=dense granule protein GRA3 | transcript_product=dense granule protein GRA3 | location=TGGT1_chrX:956231-956899(-) | protein_length=222 | sequence_SO=chromosome | SO=protein_coding	0	39.79	15	4	124	4	1	222	24.2	9.44	213.76	4	0.994	1.113	0.76269	0.451082	0.814601	0.562818	33.97	29.91	0.994	0.691	1.224	0.889	1.113	1.852	-0.01	-0.53	0.29	-0.17	0.15	0.89	1.0111e+06	1.00482e+06	9.90808e+06	1.09578e+07	25.72	51.59	11.35	51.25	1.0111e+06	911945	1.4559e+06	1.00482e+06	630373
FALSE	High	Master Protein	TGGT1_222020-t26_1-p1	transcript=TGGT1_222020-t26_1 | gene=TGGT1_222020 | organism=Toxoplasma_gondii_GT1 | gene_product=phosphoglycerate kinase PGKII | transcript_product=phosphoglycerate kinase PGKII | location=TGGT1_chrII:744480-749627(+) | protein_length=593 | sequence_SO=chromosome | SO=protein_coding	0	39.764	25	10	17	10	1	593	62.9	8.34	35.76	10	0.01	1.275					0	74.37		0.01		1.275	1.914	0.257		-6.64		0.35	0.94	-1.96	33723.1		254763	399786			152.95	85.13		33723.1
FALSE	High	Master Protein	TGGT1_277500-t26_1-p1	transcript=TGGT1_277500-t26_1 | gene=TGGT1_277500 | organism=Toxoplasma_gondii_GT1 | gene_product=putative 26S proteasome regulatory subunit 7 | transcript_product=putative 26S proteasome regulatory subunit 7 | location=TGGT1_chrXII:6576106-6581002(+) | protein_length=476 | sequence_SO=chromosome | SO=protein_coding	0	39.714	24	9	28	8	1	476	52.4	7.17	24.75	9	0.01	0.278					0	10.2	0.01	0.01	0.01	0.03	0.278	0.599	-6.64	-6.64	-6.64	-5.05	-1.85	-0.74	87872.5		1.17285e+06	325866	11.14		66.57	117.13	102612	87872.5	83118.7
FALSE	High	Master Protein	TGGT1_228470-t26_1-p1	transcript=TGGT1_228470-t26_1 | gene=TGGT1_228470 | organism=Toxoplasma_gondii_GT1 | gene_product=ribosomal protein RPL15 | transcript_product=ribosomal protein RPL15 | location=TGGT1_chrX:205832-208062(+) | protein_length=205 | sequence_SO=chromosome | SO=protein_coding	0	39.695	24	5	89	5	1	205	24.3	11.18	126.64	5	0.715	0.762	0.13247	0.225247	0.280298	0.360396	16.62	7.43	0.715	0.901	0.559	0.762	0.828	0.311	-0.48	-0.15	-0.84	-0.39	-0.27	-1.68	487169	348535	5.53276e+06	4.58041e+06	35.8	12.82	87.73	30.53	487169	328933	686868	348535	296399
FALSE	High	Master Protein	TGGT1_225080-t26_1-p1	transcript=TGGT1_225080-t26_1 | gene=TGGT1_225080 | organism=Toxoplasma_gondii_GT1 | gene_product=ribosomal protein RPS18 | transcript_product=ribosomal protein RPS18 | location=TGGT1_chrX:2450681-2451929(+) | protein_length=156 | sequence_SO=chromosome | SO=protein_coding	0	39.657	39	6	124	6	1	156	17.7	10.61	212.1	6	0.973	1.025	0.720471	0.865477	0.780589	0.891704	5.83	19.37	0.933	0.973	1.054	1.025	1.159	0.789	-0.1	-0.04	0.08	0.04	0.21	-0.34	809280	787544	1.409e+07	1.63292e+07	42.06	36.56	64.07	44.37	1.44897e+06	809280	679556	1.35151e+06	787544
FALSE	High	Master Protein	TGGT1_218820-t26_1-p1	transcript=TGGT1_218820-t26_1 | gene=TGGT1_218820 | organism=Toxoplasma_gondii_GT1 | gene_product=alba 2 | transcript_product=alba 2 | location=TGGT1_chrXII:1217304-1219105(+) | protein_length=148 | sequence_SO=chromosome | SO=protein_coding	0	39.56	38	5	82	5	1	148	15.4	8.43	123.39	5	0.861	0.797	0.0550898	0.52075	0.230857	0.617634	0.05	20.55	0.861	0.744	0.861	0.797	1.254	0.623	-0.22	-0.43	-0.22	-0.33	0.33	-0.68	347963	258997	7.14084e+06	8.95308e+06	51.32	55.52	65.28	46.63	638684	347963	233745	550031	258997
FALSE	High	Master Protein	TGGT1_294898-t26_1-p1	transcript=TGGT1_294898-t26_1 | gene=TGGT1_294898 | organism=Toxoplasma_gondii_GT1 | gene_product=tetratricopeptide repeat-containing protein | transcript_product=tetratricopeptide repeat-containing protein | location=TGGT1_chrIa:1236755-1244990(-) | protein_length=827 | sequence_SO=chromosome | SO=protein_coding	0	39.549	14	8	13	8	1	827	88.6	5.29	22.72	8	0.01	0.084					0	4.37	0.01	0.01	0.01	0.01		0.71	-6.64	-6.64	-6.64	-6.64		-0.5	269429		155199	2.40897e+06	41.72		140.83		119857	269429	297585
FALSE	High	Master Protein	TGGT1_210840-t26_1-p1	transcript=TGGT1_210840-t26_1 | gene=TGGT1_210840 | organism=Toxoplasma_gondii_GT1 | gene_product=arginyl-tRNA synthetase family protein | transcript_product=arginyl-tRNA synthetase family protein | location=TGGT1_chrIV:1942834-1951568(-) | protein_length=595 | sequence_SO=chromosome | SO=protein_coding	0	39.534	17	8	22	8	1	595	67	6.51	24.58	8	0.338	0.493					16.44	3.06	0.01	0.338	100	0.493	0.451	0.541	-6.64	-1.56	6.64	-1.02	-1.15	-0.89	24514	23582	1.09093e+06	492403	68.48	67.28	92.07	99.64	14451	41584.1			14055.2
FALSE	High	Master Protein	TGGT1_257350-t26_1-p1	transcript=TGGT1_257350-t26_1 | gene=TGGT1_257350 | organism=Toxoplasma_gondii_GT1 | gene_product=putative eukaryotic translation initiation factor | transcript_product=putative eukaryotic translation initiation factor | location=TGGT1_chrVIIb:4041436-4047384(+) | protein_length=824 | sequence_SO=chromosome | SO=protein_coding	0	39.476	22	10	14	10	1	824	90.1	8.69	7.34	10	3.184	100					16.84	0	0.01	3.546	3.184	100	100	0.518	-6.64	1.83	1.67	6.64	6.64	-0.95	256099	685026	1.43874e+06	134915	25.78	24.39		104.31	272243	162316	256099		575507
FALSE	High	Master Protein	TGGT1_202380-t26_1-p1	transcript=TGGT1_202380-t26_1 | gene=TGGT1_202380 | organism=Toxoplasma_gondii_GT1 | gene_product=putative rab GDI alpha | transcript_product=putative rab GDI alpha | location=TGGT1_chrVIIa:3266429-3273830(+) | protein_length=456 | sequence_SO=chromosome | SO=protein_coding	0	39.393	25	7	33	7	1	456	51	5.76	21.57	7	100	0.525					0	19.44	4.097	100	100	0.525	0.964	0.275	2.03	6.64	6.64	-0.93	-0.05	-1.87	7997.53	113592	882766	850977		84.86	118.44	67.09	7997.53			32765.1	113592
FALSE	High	Master Protein	TGGT1_300000-t26_1-p1	transcript=TGGT1_300000-t26_1 | gene=TGGT1_300000 | organism=Toxoplasma_gondii_GT1 | gene_product=ribosomal protein RPL18 | transcript_product=ribosomal protein RPL18 | location=TGGT1_chrXII:251803-254851(+) | protein_length=187 | sequence_SO=chromosome | SO=protein_coding	0	39.323	33	7	62	7	1	187	21.2	11.52	87.96	7	0.764	0.766	0.191608	0.195069	0.325734	0.32222	19.08	16.31	0.969	0.764	0.596	0.766	0.909	0.482	-0.05	-0.39	-0.75	-0.39	-0.14	-1.05	495041	321571	4.59503e+06	3.51867e+06	53.63	59.62	81.81	48.13	495041	151888	539367	479735	116118
FALSE	High	Master Protein	TGGT1_218520-t26_1-p1	transcript=TGGT1_218520-t26_1 | gene=TGGT1_218520 | organism=Toxoplasma_gondii_GT1 | gene_product=microneme protein MIC6 | transcript_product=microneme protein MIC6 | location=TGGT1_chrXII:1418869-1419918(-) | protein_length=349 | sequence_SO=chromosome | SO=protein_coding	0	39.069	15	5	61	5	1	349	36.6	4.69	79.77	5	0.953	0.897	0.879403	0.927151	0.912968	0.945694	56.93	11	0.953	0.551	1.622	0.897	1.449	0.814	-0.07	-0.86	0.7	-0.16	0.53	-0.3	337887	260943	2.40085e+06	2.97835e+06	39.43	32.3	27.81	26.11	376601	337887	160837	359021	186007
FALSE	High	Master Protein	TGGT1_255420-t26_1-p1	transcript=TGGT1_255420-t26_1 | gene=TGGT1_255420 | organism=Toxoplasma_gondii_GT1 | gene_product=hypothetical protein | transcript_product=hypothetical protein | location=TGGT1_chrVIIb:4744619-4746351(-) | protein_length=278 | sequence_SO=chromosome | SO=protein_coding	0	39.018	44	7	26	7	1	278	30.2	6.79	29.38	7	0.858	1.345	0.024662	0.591902	0.173485	0.670822	3.07	64.16	0.858	0.883	0.808	1.345	1.927	0.685	-0.22	-0.18	-0.31	0.43	0.95	-0.55	3.11304e+06	2.67241e+06	769024	1.482e+06	60.76	56	112.23	64.66	3.11304e+06	2.59285e+06	7444305	2.67241e+06	2.28835e+06
FALSE	High	Master Protein	TGGT1_248390-t26_1-p1	transcript=TGGT1_248390-t26_1 | gene=TGGT1_248390 | organism=Toxoplasma_gondii_GT1 | gene_product=ribosomal protein RPL26 | transcript_product=ribosomal protein RPL26 | location=TGGT1_chrXII:3763041-3764059(-) | protein_length=141 | sequence_SO=chromosome | SO=protein_coding	0	38.906	40	7	72	7	1	141	16.3	10.64	88.2	7	1.323	0.739	0.0387074	0.365961	0.206657	0.492419	6.58	1.86	1.566	1.323	1.264	1.13	0.739	0.722	0.65	0.4	0.34	0.18	-0.44	-0.47	313477	414725	4.02209e+06	2.9714e+06	12.47	22.62	71.83	57.37	329183	313477	257939	515383	414725
FALSE	High	Master Protein	TGGT1_247760-t26_1-p1	transcript=TGGT1_247760-t26_1 | gene=TGGT1_247760 | organism=Toxoplasma_gondii_GT1 | gene_product=AMP-binding enzyme domain-containing protein | transcript_product=AMP-binding enzyme domain-containing protein | location=TGGT1_chrXII:3496035-3507081(-) | protein_length=793 | sequence_SO=chromosome | SO=protein_coding	0	38.672	17	10	13	10	1	793	86.9	6.7	24.71	10	0.124	54.247					2.1	125.04	100	0.124	0.01	54.247	100	0.602	6.64	-3.01	-6.64	5.76	6.64	-0.73	32654.2	12621.6	140956	434615	0.07	114.92	140.51	94.45		32669.7	32638.8	39257.5	4057.94
FALSE	High	Master Protein	TGGT1_289970-t26_1-p1	transcript=TGGT1_289970-t26_1 | gene=TGGT1_289970 | organism=Toxoplasma_gondii_GT1 | gene_product=hypothetical protein | transcript_product=hypothetical protein | location=TGGT1_chrIX:3366173-3367777(+) | protein_length=232 | sequence_SO=chromosome | SO=protein_coding	0	38.55	38	5	41	5	1	232	24.5	11.66	39.34	5	0.727	0.673	0.0818286	0.208485	0.251023	0.336795	6.51	4.21	0.529	0.787	0.727	0.673	1.024	0.63	-0.92	-0.34	-0.46	-0.57	0.03	-0.67	357918	243322	3.41848e+06	3.49894e+06	6.32	16.71	61.17	47.47	379891	357918	334693	200958	281829
FALSE	High	Master Protein	TGGT1_251540-t26_1-p1	transcript=TGGT1_251540-t26_1 | gene=TGGT1_251540 | organism=Toxoplasma_gondii_GT1 | gene_product=dense granule protein GRA9 | transcript_product=dense granule protein GRA9 | location=TGGT1_chrXII:5372511-5374084(+) | protein_length=318 | sequence_SO=chromosome | SO=protein_coding	0	38.506	27	6	20	6	1	318	35.3	5.39	21.91	6	2.639	0.889					100.81	13.87	2.639	100	0.845	0.784	0.889	1.132	1.4	6.64	-0.24	-0.35	-0.17	0.18	56294.6	143657	1.66546e+06	1.48037e+06	58.3	74.21	73.48	90.6	87261.8		36316.9	230270	143657
FALSE	High	Master Protein	TGGT1_257380-t26_1-p1	transcript=TGGT1_257380-t26_1 | gene=TGGT1_257380 | organism=Toxoplasma_gondii_GT1 | gene_product=hypothetical protein | transcript_product=hypothetical protein | location=TGGT1_chrVIIb:4013607-4015889(+) | protein_length=218 | sequence_SO=chromosome | SO=protein_coding	0	38.306	35	5	43	5	1	218	23.8	6.93	27.32	5	8.287	1.379	0.00140553	0.485314	0.0684324	0.587561	6.73	12.79	8.287	7.911	10.305	1.498	0.8	1.379	3.05	2.98	3.37	0.58	-0.32	0.46	90746.2	751988	4.76427e+06	4.3074e+06	44	57.62	43.19	55.74	90746.2	52855	134299	751988	418118
FALSE	High	Master Protein	TGGT1_259240-t26_1-p1	transcript=TGGT1_259240-t26_1 | gene=TGGT1_259240 | organism=Toxoplasma_gondii_GT1 | gene_product=ribosomal protein RPS21 | transcript_product=ribosomal protein RPS21 | location=TGGT1_chrVIIb:2808644-2809838(-) | protein_length=82 | sequence_SO=chromosome | SO=protein_coding	0	38.302	49	3	97	3	1	82	9	8.05	111.74	3	0.837	0.764	0.596885	0.232579	0.670939	0.362685	12.29	4.26	0.738	1.22	0.837	0.764	1.032	0.726	-0.44	0.29	-0.26	-0.39	0.05	-0.46	639541	472210	5.70679e+06	5.89132e+06	56.43	47.31	83.33	70.91	639541	329473	1.10425e+06	472210	401964
FALSE	High	Master Protein	TGGT1_263320-t26_1-p1	transcript=TGGT1_263320-t26_1 | gene=TGGT1_263320 | organism=Toxoplasma_gondii_GT1 | gene_product=hypothetical protein | transcript_product=hypothetical protein | location=TGGT1_chrVIIb:613192-614403(-) | protein_length=403 | sequence_SO=chromosome | SO=protein_coding	0	38.276	26	8	30	8	1	403	42.1	12.21	16.02	8	0.543	0.683					6.23	27.61	0.62	0.543	0.01	0.956	0.683	0.403	-0.69	-0.88	-6.64	-0.06	-0.55	-1.31	97601.9	84469.6	1.87438e+06	1.2811e+06	56.13	61.59	68.9	26.67	217211	97601.9	81484.7	134703	52969
FALSE	High	Master Protein	TGGT1_229930-t26_1-p1	transcript=TGGT1_229930-t26_1 | gene=TGGT1_229930 | organism=Toxoplasma_gondii_GT1 | gene_product=p25-alpha family protein | transcript_product=p25-alpha family protein | location=TGGT1_chrVIII:470700-471465(+) | protein_length=163 | sequence_SO=chromosome | SO=protein_coding	0	38.223	47	4	34	4	1	163	17.3	8.32	41.46	4	0.733	0.829	0.323699	0.111762	0.449215	0.232648	24.38	1.25	0.957	0.733	0.15	0.819	0.829	0.962	-0.06	-0.45	-2.73	-0.29	-0.27	-0.06	244436	179060	2.8219e+06	2.33921e+06	21.52	79.54	59.25	68.89	317352	244436	208886	303722	179060
FALSE	High	Master Protein	TGGT1_201800-t26_1-p1	transcript=TGGT1_201800-t26_1 | gene=TGGT1_201800 | organism=Toxoplasma_gondii_GT1 | gene_product=hypothetical protein | transcript_product=hypothetical protein | location=TGGT1_chrVIIa:3679021-3681115(+) | protein_length=267 | sequence_SO=chromosome | SO=protein_coding	0	38.195	22	6	37	6	1	267	28.5	8.47	40.02	6	1.118	0.567					146.93	14.25	1.118	100	0.01	0.737	0.567	0.381	0.16	6.64	-6.64	-0.44	-0.82	-1.39	64466.9	61764.2	1.98732e+06	1.12685e+06	102.81	112.01	42.25	11.92	162143		25631.6	181305	21040.8
FALSE	High	Master Protein	TGGT1_203990-t26_1-p1	transcript=TGGT1_203990-t26_1 | gene=TGGT1_203990 | organism=Toxoplasma_gondii_GT1 | gene_product=rhoptry protein ROP12 | transcript_product=rhoptry protein ROP12 | location=TGGT1_chrVIIa:1957210-1959051(-) | protein_length=236 | sequence_SO=chromosome | SO=protein_coding	0	38.177	24	4	57	4	1	236	25.4	4.61	54.85	4	1.059	0.987	0.379714	0.756632	0.491401	0.812384	6.07	32.48	0.971	1.059	1.102	0.987	1.209	0.71	-0.04	0.08	0.14	-0.02	0.27	-0.49	860217	948319	1.67641e+06	2.0273e+06	10.03	13.75	82.38	55.78	816522	987944	860217	792933	1.04627e+06
FALSE	High	Master Protein	TGGT1_267060-t26_1-p1	transcript=TGGT1_267060-t26_1 | gene=TGGT1_267060 | organism=Toxoplasma_gondii_GT1 | gene_product=ribosomal protein RPL14 | transcript_product=ribosomal protein RPL14 | location=TGGT1_chrIX:634719-636622(+) | protein_length=157 | sequence_SO=chromosome | SO=protein_coding	0	37.986	41	7	49	7	1	157	17.9	10.77	54.85	7	1.265	0.579	0.186714	0.165753	0.320082	0.285347	14.24	16.38	2.092	1.265	1.144	0.579	0.77	0.243	1.07	0.34	0.19	-0.79	-0.38	-2.04	209269	319091	5.40847e+06	2.79057e+06	24.88	34.13	62.91	38.25	209269	171163	279006	437846	216551
FALSE	High	Master Protein	TGGT1_239500-t26_1-p1	transcript=TGGT1_239500-t26_1 | gene=TGGT1_239500 | organism=Toxoplasma_gondii_GT1 | gene_product=putative proteasome subunit alpha type | transcript_product=putative proteasome subunit alpha type | location=TGGT1_chrVI:713977-716908(+) | protein_length=252 | sequence_SO=chromosome | SO=protein_coding	0	37.84	22	4	58	4	1	252	27.9	5.38	67.88	4	0.636	0.722					23.39	4.2	0.636	100	0.388	0.722	0.762	0.646	-0.65	6.64	-1.37	-0.47	-0.39	-0.63	191742	73620	2.86982e+06	2.13149e+06	1.39	73.46	56.46	47.52	193636		189867	123127	18010.1
FALSE	High	Master Protein	TGGT1_267080-t26_1-p1	transcript=TGGT1_267080-t26_1 | gene=TGGT1_267080 | organism=Toxoplasma_gondii_GT1 | gene_product=putative 26S protease regulatory subunit 4 | transcript_product=putative 26S protease regulatory subunit 4 | location=TGGT1_chrIX:625144-630490(+) | protein_length=441 | sequence_SO=chromosome | SO=protein_coding	0	37.801	24	8	35	7	1	441	49.1	6.42	27.97	8	1.106	0.755					111.44	1.45	0.275	1.106	100	0.472	0.768	0.755	-1.86	0.14	6.64	-1.08	-0.38	-0.41	156654	31039.8	2.28823e+06	1.75763e+06	82.08	137.74	83.33	93.38	80722.9	304007		22160.8	336102
FALSE	High	Master Protein	TGGT1_205340-t26_1-p1	transcript=TGGT1_205340-t26_1 | gene=TGGT1_205340 | organism=Toxoplasma_gondii_GT1 | gene_product=ribosomal protein RPS12 | transcript_product=ribosomal protein RPS12 | location=TGGT1_chrVIIa:1379775-1380954(+) | protein_length=142 | sequence_SO=chromosome | SO=protein_coding	0	37.719	54	5	67	5	1	142	15.4	5.01	90.7	5	0.658	0.861	0.0699893	0.543063	0.234676	0.634064	0.17	43.42	0.658	0.659	0.405	0.861	1.27	0.521	-0.6	-0.6	-1.3	-0.22	0.34	-0.94	584431	385414	2.26209e+06	2.7926e+06	71.66	40.94	105.85	65.95	490476	584431	1.67042e+06	322617	385414
FALSE	High	Master Protein	TGGT1_233500-t26_1-p1	transcript=TGGT1_233500-t26_1 | gene=TGGT1_233500 | organism=Toxoplasma_gondii_GT1 | gene_product=triose-phosphate isomerase TPI-II | transcript_product=triose-phosphate isomerase TPI-II | location=TGGT1_chrVIII:2678566-2683488(-) | protein_length=375 | sequence_SO=chromosome | SO=protein_coding	0	37.463	23	7	29	7	1	375	39.5	7.78	36.85	7	0.73	0.538					78.03	6.33	4.85	0.73	0.01	0.696	0.538	0.458	2.28	-0.45	-6.64	-0.52	-0.89	-1.13	42966.8	135455	2.95743e+06	1.59059e+06	148.77	107.99	69.3	52.68	10224.6	506534	42966.8	49588.4	370008
FALSE	High	Master Protein	TGGT1_263850-t26_1-p1	transcript=TGGT1_263850-t26_1 | gene=TGGT1_263850 | organism=Toxoplasma_gondii_GT1 | gene_product=hypothetical protein | transcript_product=hypothetical protein | location=TGGT1_chrVIIb:262257-265095(-) | protein_length=229 | sequence_SO=chromosome | SO=protein_coding	0	37.44	29	5	30	5	1	229	25.1	7.77	57.28	5	0.01	0.872					0	11.23	0.01	0.01	0.01	0.959	0.872	0.676	-6.64	-6.64	-6.64	-0.06	-0.2	-0.57	36585.3		2.30042e+06	2.00698e+06	82.38		87.74	69.85	36585.3	19599.8	101752
FALSE	High	Master Protein	TGGT1_310070-t26_1-p1	transcript=TGGT1_310070-t26_1 | gene=TGGT1_310070 | organism=Toxoplasma_gondii_GT1 | gene_product=putative methyltransferase | transcript_product=putative methyltransferase | location=TGGT1_chrXI:1000351-1003674(-) | protein_length=224 | sequence_SO=chromosome | SO=protein_coding	0	37.375	32	6	15	6	1	224	25.3	5.68	27.14	6	1	0.608					7412.26	2.44	0.01	100		0.581	0.608	0.667	-6.64	6.64		-0.78	-0.72	-0.58	31962.4	18303.9	1.07982e+06	656605			69.71	76.79	31962.4				18303.9
FALSE	High	Master Protein	TGGT1_291680-t26_1-p1	transcript=TGGT1_291680-t26_1 | gene=TGGT1_291680 | organism=Toxoplasma_gondii_GT1 | gene_product=Sec23/Sec24 trunk domain-containing protein | transcript_product=Sec23/Sec24 trunk domain-containing protein | location=TGGT1_chrIX:4131104-4145209(-) | protein_length=791 | sequence_SO=chromosome | SO=protein_coding	0	37.3	15	7	20	7	1	791	87.5	6.14	20.13	7	0.057	0.177					0.4	2.33	0.057	0.391	0.01	0.177	0.088	0.429	-4.12	-1.35	-6.64	-2.5	-3.51	-1.22	213599	30572.2	2.36497e+06	261070	29.26	107.99	65.56	128.75	194784	213599	327412	11192.6	83507
FALSE	High	Master Protein	TGGT1_233520-t26_1-p1	transcript=TGGT1_233520-t26_1 | gene=TGGT1_233520 | organism=Toxoplasma_gondii_GT1 | gene_product=ATP-dependent RNA helicase | transcript_product=ATP-dependent RNA helicase | location=TGGT1_chrVIII:2686087-2689735(+) | protein_length=801 | sequence_SO=chromosome | SO=protein_coding	0	37.15	19	10	15	9	1	801	88.8	7.68	22.74	10		1.433						83.34				1.433	2.238	0.16				0.52	1.16	-2.65			228250	327065			151.64	74.46
FALSE	High	Master Protein	TGGT1_311310-t26_1-p1	transcript=TGGT1_311310-t26_1 | gene=TGGT1_311310 | organism=Toxoplasma_gondii_GT1 | gene_product=protein phosphatase 2B catalytic subunit, calcineurin family phosphatse superfamily protein | transcript_product=protein phosphatase 2B catalytic subunit, calcineurin family phosphatse superfamily protein | location=TGGT1_chrXI:1924815-1932057(-) | protein_length=501 | sequence_SO=chromosome | SO=pro…	0	36.977	22	9	23	9	1	501	56.4	5.43	36.57	9	0.01	0.681					0	28.52	0.71	0.01	0.01	0.995	0.681	0.399	-0.49	-6.64	-6.64	-0.01	-0.55	-1.32	55100.9	25132	1.05143e+06	716550	72.2		97.54	56.7	35374.7	55100.9	139612	25132
FALSE	High	Master Protein	TGGT1_231600-t26_1-p1	transcript=TGGT1_231600-t26_1 | gene=TGGT1_231600 | organism=Toxoplasma_gondii_GT1 | gene_product=HEAT repeat-containing protein | transcript_product=HEAT repeat-containing protein | location=TGGT1_chrVIII:1475035-1486295(-) | protein_length=1169 | sequence_SO=chromosome | SO=protein_coding	0	36.777	8	8	16	8	1	1169	128	5.01	13.64	8	1.075	0.9					0	10.47	1.075			0.9	0.822	1.064	0.1			-0.15	-0.28	0.09	18470	19852.9	457774	380391			53.68	67.2	18470			19852.9
FALSE	High	Master Protein	TGGT1_231910-t26_1-p1	transcript=TGGT1_231910-t26_1 | gene=TGGT1_231910 | organism=Toxoplasma_gondii_GT1 | gene_product=ATP synthase F1 gamma subunit | transcript_product=ATP synthase F1 gamma subunit | location=TGGT1_chrVIII:1625860-1630528(+) | protein_length=314 | sequence_SO=chromosome | SO=protein_coding	0	36.655	39	9	14	9	1	314	34.5	9.58	15.09	9	0.01	0.01					0	0	0.01			0.01	0.01	0.406	-6.64			-6.64	-6.64	-1.3	2785.21		382902	800321			110.06		2785.21
FALSE	High	Master Protein	TGGT1_260540-t26_1-p1	transcript=TGGT1_260540-t26_1 | gene=TGGT1_260540 | organism=Toxoplasma_gondii_GT1 | gene_product=alveolin domain containing intermediate filament IMC14 | transcript_product=alveolin domain containing intermediate filament IMC14 | location=TGGT1_chrVIIb:2144399-2148137(+) | protein_length=733 | sequence_SO=chromosome | SO=protein_coding	0	36.557	18	8	19	8	1	733	83.3	8.44	15.91	8	0.968	100					5.47	0	1.006	0.29	0.968	100	100	3.286	0.01	-1.78	-0.05	6.64	6.64	1.72	375568	305343	520552	200288	15.31	54.66		125.63	303426	375568	413064	305343	109067
FALSE	High	Master Protein	TGGT1_227970-t26_1-p1	transcript=TGGT1_227970-t26_1 | gene=TGGT1_227970 | organism=Toxoplasma_gondii_GT1 | gene_product=histone family DNA-binding protein | transcript_product=histone family DNA-binding protein | location=TGGT1_chrX:610022-611286(+) | protein_length=235 | sequence_SO=chromosome | SO=protein_coding	0	36.479	29	5	21	5	1	235	25.1	6.96	21.63	5	0.246	0.474	0.0132325	0.0220208	0.117367	0.149741	1.71	5.4	0.246	0.343	0.199	0.474	0.551	0.368	-2.02	-1.54	-2.33	-1.08	-0.86	-1.44	490561	120619	1.01529e+06	481366	18.06	9.99	122.56	108.02	490561	362121	515667	120619	124112
FALSE	High	Master Protein	TGGT1_254690-t26_1-p1	transcript=TGGT1_254690-t26_1 | gene=TGGT1_254690 | organism=Toxoplasma_gondii_GT1 | gene_product=phospholipase/carboxylesterase | transcript_product=phospholipase/carboxylesterase | location=TGGT1_chrIII:1864196-1866935(+) | protein_length=497 | sequence_SO=chromosome | SO=protein_coding	0	36.433	25	8	15	8	1	497	54.2	6.1	19.33	8	0.153	0.778					26.68	8.63	2.355		0.01	0.853	0.778	0.132	1.24		-6.64	-0.23	-0.36	-2.92	31655.8	87099.3	638190	384381	21.82		83.07	29.88	36981.9		27096.7	87099.3
FALSE	High	Master Protein	TGGT1_300200-t26_1-p1	transcript=TGGT1_300200-t26_1 | gene=TGGT1_300200 | organism=Toxoplasma_gondii_GT1 | gene_product=histone H2AZ | transcript_product=histone H2AZ | location=TGGT1_chrXII:122117-123855(-) | protein_length=155 | sequence_SO=chromosome | SO=protein_coding	0	36.141	26	4	199	3	1	155	15.9	10.62	293.79	4	0.814	0.763	0.00113148	0.0350755	0.0684324	0.162729	0.26	5.3	0.798	0.816	0.814	0.763	0.848	0.716	-0.33	-0.29	-0.3	-0.39	-0.24	-0.48	2.33471e+06	1.86308e+06	1.70258e+07	1.44403e+07	20.84	21.26	52.2	45.55	2.33471e+06	2.14887e+06	3.14562e+06	1.86308e+06	1.75388e+06
FALSE	High	Master Protein	TGGT1_295360-t26_1-p1	transcript=TGGT1_295360-t26_1 | gene=TGGT1_295360 | organism=Toxoplasma_gondii_GT1 | gene_product=hypothetical protein | transcript_product=hypothetical protein | location=TGGT1_chrIa:1791407-1792949(+) | protein_length=268 | sequence_SO=chromosome | SO=protein_coding	0	36.034	25	6	64	6	1	268	29.5	7.08	94.1	6	22.742	0.794	0.000154534	0.157038	0.0534113	0.282253	9.47	3.51	22.742	24.355	21.289	0.794	0.824	0.48	4.51	4.61	4.41	-0.33	-0.28	-1.06	564625	1.37005e+07	1.58863e+06	1.3089e+06	28.27	27.2	50.92	23.72	357829	564625	643560	8.13762e+06	1.37517e+07
FALSE	High	Master Protein	TGGT1_294710-t26_1-p1	transcript=TGGT1_294710-t26_1 | gene=TGGT1_294710 | organism=Toxoplasma_gondii_GT1 | gene_product=RNA recognition motif-containing protein | transcript_product=RNA recognition motif-containing protein | location=TGGT1_chrIa:1067961-1074404(-) | protein_length=1151 | sequence_SO=chromosome | SO=protein_coding	0	36.015	11	7	11	7	1	1151	122	11.11	16.57	7		0.85						13.97				0.85	0.961	0.27				-0.23	-0.06	-1.89			219365	210779			135.35	78.76
FALSE	High	Master Protein	TGGT1_309600-t26_1-p1	transcript=TGGT1_309600-t26_1 | gene=TGGT1_309600 | organism=Toxoplasma_gondii_GT1 | gene_product=hypothetical protein | transcript_product=hypothetical protein | location=TGGT1_chrXI:713110-720853(+) | protein_length=960 | sequence_SO=chromosome | SO=protein_coding	0	35.881	8	5	11	5	1	960	106.5	9.67	19.01	5	0.01	1.054					0	94.5	0.01	0.01			1.921	0.578	-6.64	-6.64			0.94	-0.79	5916.22		140270	147789	67.72		138.78	132.81	3512.19	9965.78
FALSE	High	Master Protein	TGGT1_232300-t26_1-p1	transcript=TGGT1_232300-t26_1 | gene=TGGT1_232300 | organism=Toxoplasma_gondii_GT1 | gene_product=ribosomal protein RPS3 | transcript_product=ribosomal protein RPS3 | location=TGGT1_chrVIII:1993673-1994649(-) | protein_length=255 | sequence_SO=chromosome | SO=protein_coding	0	35.739	31	6	56	6	1	255	28.6	9.45	67.71	6	0.547	0.891	0.103361	0.846958	0.269679	0.879284	12.08	11.81	0.547	0.696	0.297	0.801	0.891	1.618	-0.87	-0.52	-1.75	-0.32	-0.17	0.69	1.08445e+06	754893	7.4616e+06	6.64504e+06	18.04	44.54	19.51	61.13	1.38264e+06	1.08445e+06	983679	756673	754893
FALSE	High	Master Protein	TGGT1_283510-t26_1-p1	transcript=TGGT1_283510-t26_1 | gene=TGGT1_283510 | organism=Toxoplasma_gondii_GT1 | gene_product=hypothetical protein | transcript_product=hypothetical protein | location=TGGT1_chrV:2942804-2948041(+) | protein_length=314 | sequence_SO=chromosome | SO=protein_coding	0	35.561	20	5	25	5	1	314	34.7	6.71	19.42	5	0.374	0.685					13.02	22.31	0.676	0.207		0.466	0.685	1.35	-0.56	-2.27		-1.1	-0.54	0.43	83793.3	31355.8	1.81557e+06	1.24454e+06	59.84	19.73	39.83	90.32	53347.8	131614		36082.6	27248.2
FALSE	High	Master Protein	TGGT1_286450-t26_1-p1	transcript=TGGT1_286450-t26_1 | gene=TGGT1_286450 | organism=Toxoplasma_gondii_GT1 | gene_product=dense granule protein GRA5 | transcript_product=dense granule protein GRA5 | location=TGGT1_chrV:1680404-1680766(+) | protein_length=120 | sequence_SO=chromosome | SO=protein_coding	0	35.479	43	5	89	5	1	120	13	5.99	210.94	5	1.071	1.083	0.10301	0.961737	0.269679	0.973669	2.95	1.63	1.05	1.071	1.161	0.854	1.083	1.095	0.07	0.1	0.22	-0.23	0.12	0.13	249881	267585	1.03341e+06	1.00506e+06	36.34	32.01	104.11	110.46	359126	249881	170960	376905	267585
FALSE	High	Master Protein	TGGT1_318710-t26_1-p1	transcript=TGGT1_318710-t26_1 | gene=TGGT1_318710 | organism=Toxoplasma_gondii_GT1 | gene_product=ATP-binding cassette sub-family F member 1 | transcript_product=ATP-binding cassette sub-family F member 1 | location=TGGT1_chrIV:1070737-1079983(+) | protein_length=811 | sequence_SO=chromosome | SO=protein_coding	0	35.361	15	8	15	8	1	811	89.1	5.91	17.09	8	0.58	0.525	0.0119549	0.531868	0.116211	0.625366	2.6	10.21	0.666	0.58	0.55	0.394	0.525	1.738	-0.59	-0.79	-0.86	-1.34	-0.93	0.8	352078	193589	436324	172076	16.88	10.74	102.02	150.32	275999	387914	352078	183755	225028
FALSE	High	Master Protein	TGGT1_258060-t26_1-p1	transcript=TGGT1_258060-t26_1 | gene=TGGT1_258060 | organism=Toxoplasma_gondii_GT1 | gene_product=putative myosin heavy chain | transcript_product=putative myosin heavy chain | location=TGGT1_chrVIIb:3580390-3584438(+) | protein_length=208 | sequence_SO=chromosome | SO=protein_coding	0	35.361	27	5	39	5	1	208	23.3	8.7	34.77	5	0.492	0.679	0.176695	0.0127399	0.311986	0.149741	16.08	4.57	0.492	0.712	0.142	0.725	0.62	0.679	-1.02	-0.49	-2.81	-0.46	-0.69	-0.56	43221.8	30791.5	2.41961e+06	1.50069e+06	100.51	107.88	46.67	46.65	199375	43221.8	34405.8	98083.2	30791.5
FALSE	High	Master Protein	TGGT1_264080-t26_1-p1	transcript=TGGT1_264080-t26_1 | gene=TGGT1_264080 | organism=Toxoplasma_gondii_GT1 | gene_product=acyl carrier protein ACP | transcript_product=acyl carrier protein ACP | location=TGGT1_chrVIIb:176277-177755(-) | protein_length=183 | sequence_SO=chromosome | SO=protein_coding	0	35.344	26	4	43	4	1	183	19.4	5.2	76.23	4	1.802	0.799	0.0750889	0.0417328	0.239277	0.166604	7.61	3.12	1.894	1.802	1.222	0.799	0.689	0.825	0.92	0.85	0.29	-0.32	-0.54	-0.28	199847	343286	4165562	2.86983e+06	54.59	44.41	77.39	83.83	199847	78605.2	280815	378556	141625
FALSE	High	Master Protein	TGGT1_222160-t26_1-p1	transcript=TGGT1_222160-t26_1 | gene=TGGT1_222160 | organism=Toxoplasma_gondii_GT1 | gene_product=aldehyde dehydrogenase | transcript_product=aldehyde dehydrogenase | location=TGGT1_chrII:900932-907660(-) | protein_length=497 | sequence_SO=chromosome | SO=protein_coding	0	35.298	22	6	13	6	1	497	53.7	6.39	30.02	6	0.01	0.613					0	3.78	0.01	0.01		0.654	0.613	0.36	-6.64	-6.64		-0.61	-0.71	-1.47	21668.7		343261	210318	95.06		130.73	107.06	9594.68	48936.5
FALSE	High	Master Protein	TGGT1_263530-t26_1-p1	transcript=TGGT1_263530-t26_1 | gene=TGGT1_263530 | organism=Toxoplasma_gondii_GT1 | gene_product=putative chaperonin | transcript_product=putative chaperonin | location=TGGT1_chrVIIb:467499-469545(-) | protein_length=127 | sequence_SO=chromosome | SO=protein_coding	0	35.286	43	4	70	4	1	127	13.9	7.12	107.92	4	0.615	0.785	0.280699	0.0830268	0.406117	0.202256	19.37	1.06	1.11	0.402	0.615	0.794	0.576	0.785	0.15	-1.31	-0.7	-0.33	-0.8	-0.35	381828	348709	3.05329e+06	2.14231e+06	36.69	55.88	84.11	92.5	381828	271836	567318	423819	109306
FALSE	High	Master Protein	TGGT1_298610-t26_1-p1	transcript=TGGT1_298610-t26_1 | gene=TGGT1_298610 | organism=Toxoplasma_gondii_GT1 | gene_product=GYF domain-containing protein | transcript_product=GYF domain-containing protein | location=TGGT1_chrXI:6511021-6521705(+) | protein_length=2331 | sequence_SO=chromosome | SO=protein_coding	0	35.151	8	10	27	10	1	2331	237.8	9.17	14.85	10	100	0.814					0	11.06	100	100	100	0.91		0.727	6.64	6.64	6.64	-0.14		-0.46		337761	104908	85355.3		43.23	139.92	139.54				297336	337761
FALSE	High	Master Protein	TGGT1_230350-t26_1-p1	transcript=TGGT1_230350-t26_1 | gene=TGGT1_230350 | organism=Toxoplasma_gondii_GT1 | gene_product=hypothetical protein | transcript_product=hypothetical protein | location=TGGT1_chrVIII:718292-730284(-) | protein_length=1254 | sequence_SO=chromosome | SO=protein_coding	0	35.142	10	8	12	8	1	1254	139	6.11	19.67	8	0.01	0.811					0	9.57	0.01			0.811	0.891	0.27	-6.64			-0.3	-0.17	-1.89	69092.3		618776	529406			77.51	13.04	69092.3
FALSE	High	Master Protein	TGGT1_240650-t26_1-p1	transcript=TGGT1_240650-t26_1 | gene=TGGT1_240650 | organism=Toxoplasma_gondii_GT1 | gene_product=putative coatomer protein complex, subunit alpha | transcript_product=putative coatomer protein complex, subunit alpha | location=TGGT1_chrVI:1326973-1343296(-) | protein_length=1300 | sequence_SO=chromosome | SO=protein_coding	0	35.113	10	10	15	10	1	1300	142.9	7.25	16.16	10	0.903	1.264					54.18	21.87	0.903	0.498	100	1.264	1.451	0.655	-0.15	-1.01	6.64	0.34	0.54	-0.61	73617.2	94972.9	607669	881456	48.44	86.19	117.34	79.45	105192	51520		94972.9	25661.5
FALSE	High	Master Protein	TGGT1_259660-t26_1-p1	transcript=TGGT1_259660-t26_1 | gene=TGGT1_259660 | organism=Toxoplasma_gondii_GT1 | gene_product=orotate phosphoribosyltransferase | transcript_product=orotate phosphoribosyltransferase | location=TGGT1_chrVIIb:2701843-2703611(-) | protein_length=283 | sequence_SO=chromosome | SO=protein_coding	0	34.861	27	6	25	6	1	283	31.6	6	34.12	6	7.788	0.858					946.08	4.54	0.607		100	1.142	0.858	0.822	-0.72		6.64	0.19	-0.22	-0.28	67559.1	65881.1	1.12295e+06	963608		62.52	74.66	63.27	67559.1			40976.4
FALSE	High	Master Protein	TGGT1_243910-t26_1-p1	transcript=TGGT1_243910-t26_1 | gene=TGGT1_243910 | organism=Toxoplasma_gondii_GT1 | gene_product=Cof family hydrolase subfamily protein | transcript_product=Cof family hydrolase subfamily protein | location=TGGT1_chrVI:2792926-2794050(+) | protein_length=374 | sequence_SO=chromosome | SO=protein_coding	0	34.649	23	6	17	6	1	374	40.6	6.11	35.56	6	0.01	1.461					0	3.79	0.011	0.01	0.01	1.461	1.499	0.983	-6.55	-6.64	-6.64	0.55	0.58	-0.02	1.51924e+06	16245	631352	946319	47.02		108.83	87.43	1.51924e+06	1.2346e+06	2.88898e+06	16245
FALSE	High	Master Protein	TGGT1_287210-t26_1-p1	transcript=TGGT1_287210-t26_1 | gene=TGGT1_287210 | organism=Toxoplasma_gondii_GT1 | gene_product=putative proteasome subunit alpha2 | transcript_product=putative proteasome subunit alpha2 | location=TGGT1_chrV:1378941-1381792(-) | protein_length=236 | sequence_SO=chromosome | SO=protein_coding	0	34.637	42	8	29	8	1	236	25.9	5.33	35.18	8	0.632	0.785					58.26	11.12	0.632	0.01	11.887	0.881	0.785	0.488	-0.66	-6.64	3.57	-0.18	-0.35	-1.04	83552.6	154012	2.30599e+06	1.81071e+06	111.18	19.17	67.83	33.57	279334	83552.6	11304.6	176512
FALSE	High	Master Protein	TGGT1_293580-t26_1-p1	transcript=TGGT1_293580-t26_1 | gene=TGGT1_293580 | organism=Toxoplasma_gondii_GT1 | gene_product=prefoldin subunit protein | transcript_product=prefoldin subunit protein | location=TGGT1_chrIa:418038-419649(-) | protein_length=170 | sequence_SO=chromosome | SO=protein_coding	0	34.524	55	8	18	8	1	170	18.3	6.55	8.61	8	1.24	0.83					103.65	54.11	2.379	0.646		1.295	0.83	0.39	1.25	-0.63		0.37	-0.27	-1.36	32180.7	39897.3	1.18576e+06	984306	100.37	32.59	81.49	22	13259.8	78101		31551.5	50450.6
FALSE	High	Master Protein	TGGT1_229000-t26_1-p1	transcript=TGGT1_229000-t26_1 | gene=TGGT1_229000 | organism=Toxoplasma_gondii_GT1 | gene_product=kelch repeat-containing protein | transcript_product=kelch repeat-containing protein | location=TGGT1_chrVIII:10568-14305(-) | protein_length=620 | sequence_SO=chromosome | SO=protein_coding	0	34.507	20	8	24	8	1	620	68.1	5.86	19.1	8	0.614	0.79					18.64	11.94	0.852	0.443		0.689	0.79	6.092	-0.23	-1.18		-0.54	-0.34	2.61	76986.6	47278.1	1.12026e+06	831623	11.9	33.73	25.69	137.47	70760.4	83760.8		60295.9	37070.8
FALSE	High	Master Protein	TGGT1_261440-t26_1-p1	transcript=TGGT1_261440-t26_1 | gene=TGGT1_261440 | organism=Toxoplasma_gondii_GT1 | gene_product=ARM repeats containing protein | transcript_product=ARM repeats containing protein | location=TGGT1_chrVIIb:1723817-1729239(+) | protein_length=274 | sequence_SO=chromosome | SO=protein_coding	0	34.417	24	6	26	6	1	274	30.5	5.11	29.65	6	1.009	0.738	0.606779	0.712026	0.678263	0.774685	20.13	38.6	1.009	1.561	0.872	0.738	1.935	0.385	0.01	0.64	-0.2	-0.44	0.95	-1.38	551337	645436	2.62316e+06	1.73091e+06	12.88	33.11	44.43	74.18	639632	551337	496014	645436	860445
FALSE	High	Master Protein	TGGT1_211420-t26_1-p1	transcript=TGGT1_211420-t26_1 | gene=TGGT1_211420 | organism=Toxoplasma_gondii_GT1 | gene_product=RNA recognition motif-containing protein | transcript_product=RNA recognition motif-containing protein | location=TGGT1_chrIV:1661239-1664919(-) | protein_length=189 | sequence_SO=chromosome | SO=protein_coding	0	34.41	30	4	35	4	1	189	22.8	7.03	41.43	4	3.372	0.897	0.162803	0.938672	0.303692	0.955057	89.33	31.22	10.431	1.34	3.372	0.897	1.574	0.663	3.38	0.42	1.75	-0.16	0.65	-0.59	436555	725498	1.69278e+06	2.53544e+06	70.1	45.5	100.25	66.08	69550.7	520866	436555	725498	698161
FALSE	High	Master Protein	TGGT1_231440-t26_1-p1	transcript=TGGT1_231440-t26_1 | gene=TGGT1_231440 | organism=Toxoplasma_gondii_GT1 | gene_product=LsmAD domain-containing protein | transcript_product=LsmAD domain-containing protein | location=TGGT1_chrVIII:1418874-1426956(-) | protein_length=1524 | sequence_SO=chromosome | SO=protein_coding	0	34.354	12	10	12	10	1	1524	148	9.44	9.39	10	0.053	0.01					1.07	0	0.282		0.01	0.01	0.01	0.388	-1.83		-6.64	-6.64	-6.64	-1.36	289377	72858.6	38429.9	1.0038e+06	16.04		167.77		258223		324291	72858.6
FALSE	High	Master Protein	TGGT1_411760-t26_1-p1	transcript=TGGT1_411760-t26_1 | gene=TGGT1_411760 | organism=Toxoplasma_gondii_GT1 | gene_product=actin | transcript_product=actin | location=AAQM03000536:57-991(+) | protein_length=287 | sequence_SO=contig | SO=protein_coding	0	34.258	29	7	73	6	1	287	32	6.04	53.01	7	0.704	0.024					13.04	0.01	0.579	0.928	0.704	0.024	0.027	0.01	-0.79	-0.11	-0.51	-5.41	-5.2	-6.64	1.65588e+06	1.40131e+06	3.0194e+06	63873	13.85	27.01	24.13	34.39	1.52807e+06	1.65588e+06	1.99079e+06	884668	1.53718e+06
FALSE	High	Master Protein	TGGT1_213280-t26_1-p1	transcript=TGGT1_213280-t26_1 | gene=TGGT1_213280 | organism=Toxoplasma_gondii_GT1 | gene_product=SAG-related sequence SRS25 | transcript_product=SAG-related sequence SRS25 | location=TGGT1_chrV:764647-765222(-) | protein_length=191 | sequence_SO=chromosome | SO=protein_coding	0	34.254	45	4	19	4	1	191	20.8	6.06	48	4	0.01	1.065					0	29.63		0.01	0.01	1.065	0.852	1.492		-6.64	-6.64	0.09	-0.23	0.58	155233		1.52887e+06	1.62795e+06	79.8		99.62	118.14		81927.2	294132
FALSE	High	Master Protein	TGGT1_320210-t26_1-p1	transcript=TGGT1_320210-t26_1 | gene=TGGT1_320210 | organism=Toxoplasma_gondii_GT1 | gene_product=WD domain, G-beta repeat domain containing protein | transcript_product=WD domain, G-beta repeat domain containing protein | location=TGGT1_chrIV:376406-380420(+) | protein_length=515 | sequence_SO=chromosome | SO=protein_coding	0	34.078	22	6	15	6	1	515	56	7.46	19.5	6	0.032	0.653					0.23	28.03	0.01	0.105		0.653	0.364	0.97	-6.64	-3.25		-0.61	-1.46	-0.04	43017.6	5962.55	897283	443403	37.82		57.57	98.01	32704.9	56582			5962.55
FALSE	High	Master Protein	TGGT1_290890-t26_1-p1	transcript=TGGT1_290890-t26_1 | gene=TGGT1_290890 | organism=Toxoplasma_gondii_GT1 | gene_product=putative carbonyl reductase 1 | transcript_product=putative carbonyl reductase 1 | location=TGGT1_chrIX:3727182-3731041(+) | protein_length=411 | sequence_SO=chromosome | SO=protein_coding	0	33.992	23	7	17	7	1	411	45.2	8.35	26.49	7	0.393	0.8					18.07	16.37	0.191	0.811		0.8	0.938	0.401	-2.39	-0.3		-0.32	-0.09	-1.32	54850	21572.7	451315	423243	114.94	55.16	129.45	93.79	170677	17627		32566.3	14290.3
FALSE	High	Master Protein	TGGT1_291890-t26_1-p1	transcript=TGGT1_291890-t26_1 | gene=TGGT1_291890 | organism=Toxoplasma_gondii_GT1 | gene_product=microneme protein MIC1 | transcript_product=microneme protein MIC1 | location=TGGT1_chrIX:4200849-4203191(-) | protein_length=456 | sequence_SO=chromosome | SO=protein_coding	0	33.984	17	6	50	6	1	456	48.6	5.34	58.17	6	2.016	0.807	0.932379	0.133823	0.946295	0.261242	94.07	12.2	2.016	3.295	0.194	0.807	0.944	0.705	1.01	1.72	-2.37	-0.31	-0.08	-0.5	155560	384961	5.27646e+06	4.25772e+06	55.04	87.58	47.48	33.95	322098	116815	155560	649409	384961
FALSE	High	Master Protein	TGGT1_202870-t26_1-p1	transcript=TGGT1_202870-t26_1 | gene=TGGT1_202870 | organism=Toxoplasma_gondii_GT1 | gene_product=SAP domain-containing protein | transcript_product=SAP domain-containing protein | location=TGGT1_chrVIIa:2870446-2874438(+) | protein_length=394 | sequence_SO=chromosome | SO=protein_coding	0	33.827	25	7	18	7	1	394	42.3	9.61	15.62	7	0.453	0.569					0.5	0.61	0.46	0.01	0.453	0.569	0.562	1.338	-1.12	-6.64	-1.14	-0.81	-0.83	0.42	44499.2	30167.3	954004	542688	74.62	82.54	12.96	64.01	127865	44499.2	34169.2	58832.9
FALSE	High	Master Protein	TGGT1_297430-t26_1-p1	transcript=TGGT1_297430-t26_1 | gene=TGGT1_297430 | organism=Toxoplasma_gondii_GT1 | gene_product=hypothetical protein | transcript_product=hypothetical protein | location=TGGT1_chrII:1749482-1752364(+) | protein_length=248 | sequence_SO=chromosome | SO=protein_coding	0	33.653	22	4	21	4	1	248	25.3	11.63	33.13	4	0.139	0.703	0.0790299	0.0173905	0.246139	0.149741	0.05	1.26	0.541	0.136	0.139	0.791	0.691	0.703	-0.89	-2.88	-2.85	-0.34	-0.53	-0.51	329574	74719.3	1.18382e+06	818169	51.94	36.01	114.71	112.87	178195	329574	539102	96428.6	44806.8
FALSE	High	Master Protein	TGGT1_249530-t26_1-p1	transcript=TGGT1_249530-t26_1 | gene=TGGT1_249530 | organism=Toxoplasma_gondii_GT1 | gene_product=putative exportin 1 | transcript_product=putative exportin 1 | location=TGGT1_chrXII:4524784-4539887(+) | protein_length=1125 | sequence_SO=chromosome | SO=protein_coding	0	33.628	10	9	16	9	1	1125	129	5.74	22.25	9	0.01	1.074					0	8.98	0.094	0.01	0.01	0.526	1.139	1.074	-3.41	-6.64	-6.64	-0.93	0.19	0.1	120035	17396.4	903990	561822	54.21		72.45	92.27	185503	55150	120035	17396.4
FALSE	High	Master Protein	TGGT1_223140-t26_1-p1	transcript=TGGT1_223140-t26_1 | gene=TGGT1_223140 | organism=Toxoplasma_gondii_GT1 | gene_product=tRNA binding domain-containing protein | transcript_product=tRNA binding domain-containing protein | location=TGGT1_chrII:1451648-1456657(+) | protein_length=472 | sequence_SO=chromosome | SO=protein_coding	0	33.613	17	5	47	5	1	472	51	8.05	55.05	5	0.787	0.795					15	2.41	0.658	0.787	100	0.795	0.816	0.563	-0.6	-0.35	6.64	-0.33	-0.29	-0.83	109962	35677.2	2.0125e+06	1.60083e+06	100.29	112.77	72.62	49.87	266559	45362		175350	35677.2
FALSE	High	Master Protein	TGGT1_309820-t26_1-p1	transcript=TGGT1_309820-t26_1 | gene=TGGT1_309820 | organism=Toxoplasma_gondii_GT1 | gene_product=ribosomal protein RPL11 | transcript_product=ribosomal protein RPL11 | location=TGGT1_chrXI:792484-794108(+) | protein_length=175 | sequence_SO=chromosome | SO=protein_coding	0	33.582	37	5	44	5	1	175	20.2	10.07	82.58	5	0.939	0.823	0.616387	0.297849	0.684719	0.421953	49.58	18.79	1.295	0.939	0.504	0.823	0.977	0.41	0.37	-0.09	-0.99	-0.28	-0.03	-1.29	706148	399899	3.59883e+06	3.51465e+06	28.23	53.63	108.32	63.85	706148	425656	754230	914790	399899
FALSE	High	Master Protein	TGGT1_256770-t26_1-p1	transcript=TGGT1_256770-t26_1 | gene=TGGT1_256770 | organism=Toxoplasma_gondii_GT1 | gene_product=putative eukaryotic translation initiation factor 4A, isoform 3 | transcript_product=putative eukaryotic translation initiation factor 4A, isoform 3 | location=TGGT1_chrVIIb:4408455-4411451(+) | protein_length=395 | sequence_SO=chromosome | SO=protein_coding	0	33.47	24	8	24	8	1	395	45.1	6.38	24.29	8	0.018	1.881	0.452106	0.0530456	0.548986	0.173881	0.02	35.09	0.018	12.54	0.01	1.881	1.436	2.413	-5.77	3.65	-6.64	0.91	0.52	1.27	1.71377e+06	31459.9	704970	1.01207e+06	93.05	111.19	61.14	84.39	1.71377e+06	11708.2	2.78804e+06	31459.9	146818
FALSE	High	Master Protein	TGGT1_216790-t26_1-p1	transcript=TGGT1_216790-t26_1 | gene=TGGT1_216790 | organism=Toxoplasma_gondii_GT1 | gene_product=putative ATP-binding cassette sub-family E member 1 | transcript_product=putative ATP-binding cassette sub-family E member 1 | location=TGGT1_chrXI:5800419-5807047(-) | protein_length=613 | sequence_SO=chromosome | SO=protein_coding	0	33.469	17	7	11	7	1	613	69.2	8.07	18.38	7	0.115	1.475					3.44	14.26	0.031	0.433		1.475	2.009	1.334	-5.02	-1.21		0.56	1.01	0.42	112467	12988.8	167244	246760	44.03	107.66	143.57	136.57	155199	81500		4782.21	35278.4
FALSE	High	Master Protein	TGGT1_286080-t26_1-p1	transcript=TGGT1_286080-t26_1 | gene=TGGT1_286080 | organism=Toxoplasma_gondii_GT1 | gene_product=elongation factor 2 family protein | transcript_product=elongation factor 2 family protein | location=TGGT1_chrV:1864243-1874860(+) | protein_length=1008 | sequence_SO=chromosome | SO=protein_coding	0	33.359	13	10	17	9	1	1008	113.3	5.2	11.67	10		0.894						16.34				0.77	0.894	2.266				-0.38	-0.16	1.18			192494	172012			84.15	130.87
FALSE	High	Master Protein	TGGT1_269690-t26_1-p1	transcript=TGGT1_269690-t26_1 | gene=TGGT1_269690 | organism=Toxoplasma_gondii_GT1 | gene_product=hypothetical protein | transcript_product=hypothetical protein | location=TGGT1_chrVIII:5679281-5681878(+) | protein_length=865 | sequence_SO=chromosome | SO=protein_coding	0	33.311	12	8	16	8	1	865	94.2	7.2	16.9	8	0.01	0.896					0	3.84	0.074	0.01	0.01	0.566	0.896	0.925	-3.76	-6.64	-6.64	-0.82	-0.16	-0.11	36533.1	8668.77	491776	399068	79.91		83.82	97.96	117334	36533.1	29445.4	8668.77
FALSE	High	Master Protein	TGGT1_268760-t26_1-p1	transcript=TGGT1_268760-t26_1 | gene=TGGT1_268760 | organism=Toxoplasma_gondii_GT1 | gene_product=hypothetical protein | transcript_product=hypothetical protein | location=TGGT1_chrVIII:6327416-6328769(-) | protein_length=292 | sequence_SO=chromosome | SO=protein_coding	0	33.255	18	6	24	6	1	292	32	7.33	23.42	6	0.497	0.73					14.55	2.42	0.732	0.337		0.73	0.707	3.611	-0.45	-1.57		-0.45	-0.5	1.85	77828.3	38671.3	1.27896e+06	1.03301e+06	21.89	70.11	24.76	73.78	90968.9	66585.9		66601.3	22454.1
FALSE	High	Master Protein	TGGT1_267330-t26_1-p1	transcript=TGGT1_267330-t26_1 | gene=TGGT1_267330 | organism=Toxoplasma_gondii_GT1 | gene_product=fumarate hydratase | transcript_product=fumarate hydratase | location=TGGT1_chrIX:545528-551285(+) | protein_length=775 | sequence_SO=chromosome | SO=protein_coding	0	33.196	17	8	11	8	1	775	84.2	8.53	19.37	8	0.311	4.213					223.08	99.52	9.681	0.01		4.213	14.964	1.385	3.28	-6.64		2.07	3.9	0.47	12565.7	54483.4	133715	683857	94.17		150.43	88.44	5627.63	28057.6		54483.4
FALSE	High	Master Protein	TGGT1_232230-t26_1-p1	transcript=TGGT1_232230-t26_1 | gene=TGGT1_232230 | organism=Toxoplasma_gondii_GT1 | gene_product=ribosomal protein RPL30 | transcript_product=ribosomal protein RPL30 | location=TGGT1_chrVIII:1959965-1961788(-) | protein_length=108 | sequence_SO=chromosome | SO=protein_coding	0	33.161	44	5	28	5	1	108	11.7	9.33	43.18	5	2.622	0.496					393.58	12.64	0.477	14.397		0.68	0.496	0.325	-1.07	3.85		-0.56	-1.01	-1.62	122561	321331	1.34074e+06	784722	108.13	85.12	123.64	96.1	335533	44768.1		160197	644544
FALSE	High	Master Protein	TGGT1_232050-t26_1-p1	transcript=TGGT1_232050-t26_1 | gene=TGGT1_232050 | organism=Toxoplasma_gondii_GT1 | gene_product=DnaJ domain-containing protein | transcript_product=DnaJ domain-containing protein | location=TGGT1_chrVIII:1780837-1792241(-) | protein_length=869 | sequence_SO=chromosome | SO=protein_coding	0	33.038	15	9	15	9	1	869	96.1	6.52	11.04	9	0.557	0.396					48.79	0.5	0.221	1.403		0.396	0.388	0.79	-2.18	0.49		-1.33	-1.37	-0.34	24414.5	13603	1.1233e+06	445370	120.13	45.16	89.14	123.07	85569	6965.95		18937.9	9770.88
FALSE	High	Master Protein	TGGT1_221380-t26_1-p1	transcript=TGGT1_221380-t26_1 | gene=TGGT1_221380 | organism=Toxoplasma_gondii_GT1 | gene_product=alba 1 | transcript_product=alba 1 | location=TGGT1_chrII:281451-282798(-) | protein_length=247 | sequence_SO=chromosome | SO=protein_coding	0	32.985	21	5	60	5	1	247	27.2	9.74	62.57	5	0.589	0.641	0.207736	0.0530937	0.336976	0.173881	14.92	9.16	0.589	1.002	0.418	0.641	0.781	0.545	-0.76	0	-1.26	-0.64	-0.36	-0.88	413524	282649	4.31323e+06	3.3678e+06	28.48	27.43	72.46	56.08	510385	282215	413524	300612	282649
FALSE	High	Master Protein	TGGT1_247460-t26_1-p1	transcript=TGGT1_247460-t26_1 | gene=TGGT1_247460 | organism=Toxoplasma_gondii_GT1 | gene_product=proliferating cell nuclear antigen PCNA1 | transcript_product=proliferating cell nuclear antigen PCNA1 | location=TGGT1_chrXII:3286520-3289072(-) | protein_length=317 | sequence_SO=chromosome | SO=protein_coding	0	32.944	32	8	19	8	1	317	34.5	4.73	13.1	8	0.889	1.211	0.460605	0.833585	0.553372	0.872058	0.64	38	0.889	40.667	0.885	0.651	1.521	1.211	-0.17	5.35	-0.18	-0.62	0.61	0.28	321878	410180	513607	442824	125.16	78.29	121.71	130.21	321878	10086.3	1353924	286262	410180
FALSE	High	Master Protein	TGGT1_294790-t26_1-p1	transcript=TGGT1_294790-t26_1 | gene=TGGT1_294790 | organism=Toxoplasma_gondii_GT1 | gene_product=hypothetical protein | transcript_product=hypothetical protein | location=TGGT1_chrIa:1130567-1131622(-) | protein_length=351 | sequence_SO=chromosome | SO=protein_coding	0	32.892	23	5	34	5	1	351	37.7	4.78	50.38	5	0.669	0.791					10.99	10.77	0.78	0.669	0.01	0.699	0.791	1.324	-0.36	-0.58	-6.64	-0.52	-0.34	0.4	226560	123754	1.89461e+06	1.32527e+06	42.24	48.38	18.99	54.6	226560	129435	319671	176747	86648.8
FALSE	High	Master Protein	TGGT1_273905-t26_1-p1	transcript=TGGT1_273905-t26_1 | gene=TGGT1_273905 | organism=Toxoplasma_gondii_GT1 | gene_product=hypothetical protein | transcript_product=hypothetical protein | location=TGGT1_chrVIII:3178311-3184467(+) | protein_length=373 | sequence_SO=chromosome | SO=protein_coding	0	32.885	24	7	16	7	1	373	41.1	6.55	18.43	7		0.021						0.03				0.021	0.01	0.819				-5.57	-6.64	-0.29			675923	131693			62.6	138.93
FALSE	High	Master Protein	TGGT1_267810-t26_1-p1	transcript=TGGT1_267810-t26_1 | gene=TGGT1_267810 | organism=Toxoplasma_gondii_GT1 | gene_product=Rab 5 | transcript_product=Rab 5 | location=TGGT1_chrIX:174026-177378(+) | protein_length=241 | sequence_SO=chromosome | SO=protein_coding	0	32.86	41	6	11	6	1	241	26.5	6.14	14.61	6	0.01	0.247					0	0.34	0.01			0.247	0.238	0.374	-6.64			-2.02	-2.07	-1.42	44903.3		655488	155780			88.16	110.97	44903.3
FALSE	High	Master Protein	TGGT1_301420-t26_1-p1	transcript=TGGT1_301420-t26_1 | gene=TGGT1_301420 | organism=Toxoplasma_gondii_GT1 | gene_product=hypothetical protein | transcript_product=hypothetical protein | location=TGGT1_chrIV:2353774-2357126(+) | protein_length=263 | sequence_SO=chromosome | SO=protein_coding	0	32.829	31	7	11	7	1	263	29.5	6.73	12.46	7	0.01	0.476					0	17.47	0.05	0.01	0.01	0.476	0.723	0.01	-4.32	-6.64	-6.64	-1.07	-0.47	-6.64	25513.6	5429.37	349642	204872	97.38		114.58	29.08	108815	25513.6	19483.4	5429.37
FALSE	High	Master Protein	TGGT1_209985-t26_1-p1	transcript=TGGT1_209985-t26_1 | gene=TGGT1_209985 | organism=Toxoplasma_gondii_GT1 | gene_product=cAMP-dependent protein kinase | transcript_product=cAMP-dependent protein kinase | location=TGGT1_chrIb:1628949-1629743(-) | protein_length=264 | sequence_SO=chromosome | SO=protein_coding	0	32.809	39	7	11	6	1	264	29.6	9.35	17.83	7		0.01						0				0.01	0.01	1.08				-6.64	-6.64	0.11			327465	1.28431e+06			91.4
FALSE	High	Master Protein	TGGT1_314090-t26_1-p1	transcript=TGGT1_314090-t26_1 | gene=TGGT1_314090 | organism=Toxoplasma_gondii_GT1 | gene_product=proteasome beta subunit | transcript_product=proteasome beta subunit | location=TGGT1_chrXI:3875155-3879686(-) | protein_length=205 | sequence_SO=chromosome | SO=protein_coding	0	32.807	28	4	26	4	1	205	22.5	5.35	34.06	4	0.649	0.542					61.45	7.63	0.649	1.491	0.01	0.637	0.422	0.542	-0.62	0.58	-6.64	-0.65	-1.24	-0.88	27365.2	47742.5	2.8188e+06	1.55695e+06	102.25	66.99	57.52	60.39	123137	19131.5	27365.2	79891.8	28530.4
FALSE	High	Master Protein	TGGT1_266990-t26_1-p1	transcript=TGGT1_266990-t26_1 | gene=TGGT1_266990 | organism=Toxoplasma_gondii_GT1 | gene_product=beta-COP | transcript_product=beta-COP | location=TGGT1_chrIX:687782-698362(+) | protein_length=1103 | sequence_SO=chromosome | SO=protein_coding	0	32.572	9	7	12	7	1	1103	121.9	6.61	12.4	7	0.01	0.01					0	0	0.01	3.289	0.01	0.01	0.01	0.279	-6.64	1.72	-6.64	-6.64	-6.64	-1.84	111540	383735	66412.1	631889	45.3		163.76		111540	116687	43251.5		383735
FALSE	High	Master Protein	TGGT1_261210-t26_1-p1	transcript=TGGT1_261210-t26_1 | gene=TGGT1_261210 | organism=Toxoplasma_gondii_GT1 | gene_product=putative 26s proteasome subunit p55 | transcript_product=putative 26s proteasome subunit p55 | location=TGGT1_chrVIIb:1803646-1810703(+) | protein_length=485 | sequence_SO=chromosome | SO=protein_coding	0	32.541	15	6	11	6	1	485	55	6.2	15.55	6		0.096						6.57					0.01	0.93					-6.64	-0.11			520824	1.47107e+06			113.78
FALSE	High	Master Protein	TGGT1_264610-t26_1-p1	transcript=TGGT1_264610-t26_1 | gene=TGGT1_264610 | organism=Toxoplasma_gondii_GT1 | gene_product=RNA recognition motif-containing protein | transcript_product=RNA recognition motif-containing protein | location=TGGT1_chrIX:1992388-1998489(-) | protein_length=430 | sequence_SO=chromosome | SO=protein_coding	0	32.46	21	8	39	8	1	430	45	5.16	30.85	8	0.545	1.011	0.2362	0.994822	0.366424	0.996966	21.11	12.06	0.545	1.017	0.283	1.011	1.093	0.904	-0.88	0.02	-1.82	0.02	0.13	-0.15	579348	238249	2.79205e+06	2.82285e+06	43.76	29.89	91.29	82.69	579348	234339	604652	315473	238249
FALSE	High	Master Protein	TGGT1_285980B-t26_1-p1	transcript=TGGT1_285980B-t26_1 | gene=TGGT1_285980B | organism=Toxoplasma_gondii_GT1 | gene_product=glucosephosphate-mutase GPM1 | transcript_product=glucosephosphate-mutase GPM1 | location=TGGT1_chrV:1943610-1946285(-) | protein_length=307 | sequence_SO=chromosome | SO=protein_coding	0	32.439	26	7	31	7	1	307	34.5	5.39	29.5	7	1.138	1.327	0.919113	0.543928	0.939845	0.634064	118.98	55.67	5.353	1.138	0.225	1.327	1.825	0.736	2.42	0.19	-2.15	0.41	0.87	-0.44	75032.9	85420	1.14928e+06	1.67649e+06	80.46	80.15	100.5	56.32	43075.7	75032.9	207992	230603	85420
FALSE	High	Master Protein	TGGT1_313670-t26_1-p1	transcript=TGGT1_313670-t26_1 | gene=TGGT1_313670 | organism=Toxoplasma_gondii_GT1 | gene_product=adaptin n terminal region domain-containing protein | transcript_product=adaptin n terminal region domain-containing protein | location=TGGT1_chrXI:3555976-3562447(-) | protein_length=1010 | sequence_SO=chromosome | SO=protein_coding	0	32.408	12	8	11	8	1	1010	107	6.6	6.67	8		0.01						0				0.01	0.01	0.096				-6.64	-6.64	-3.39			189884	120638			115.48
FALSE	High	Master Protein	TGGT1_264440-t26_1-p1	transcript=TGGT1_264440-t26_1 | gene=TGGT1_264440 | organism=Toxoplasma_gondii_GT1 | gene_product=signal recognition particle receptor beta subunit protein | transcript_product=signal recognition particle receptor beta subunit protein | location=TGGT1_chrIX:2059841-2063738(-) | protein_length=347 | sequence_SO=chromosome | SO=protein_coding	0	32.176	19	5	12	5	1	347	37.4	7.15	16.2	5	0.01	2.641					0	112.87	0.01	0.01		2.641	4.652	0.334	-6.64	-6.64		1.4	2.22	-1.58	6751.59		218011	1.01413e+06	52.14		152.89	53.15	9941.3	4585.32
FALSE	High	Master Protein	TGGT1_283540-t26_1-p1	transcript=TGGT1_283540-t26_1 | gene=TGGT1_283540 | organism=Toxoplasma_gondii_GT1 | gene_product=hypothetical protein | transcript_product=hypothetical protein | location=TGGT1_chrV:2924949-2926408(-) | protein_length=376 | sequence_SO=chromosome | SO=protein_coding	0	31.888	14	5	46	5	1	376	41.9	8.02	46.65	5	1.004	0.929					60.98	0.43	0.673	1.499		0.929	0.926	1.588	-0.57	0.58		-0.11	-0.11	0.67	169133	169813	2.13214e+06	2.41121e+06	69.98	19.94	19.4	17.13	290933	98325.2		195706	147346
FALSE	High	Master Protein	TGGT1_273490-t26_1-p1	transcript=TGGT1_273490-t26_1 | gene=TGGT1_273490 | organism=Toxoplasma_gondii_GT1 | gene_product=putative glutamine synthetase, type I | transcript_product=putative glutamine synthetase, type I | location=TGGT1_chrVIII:3443164-3448518(+) | protein_length=479 | sequence_SO=chromosome | SO=protein_coding	0	31.85	18	6	17	6	1	479	53.4	6.55	16.46	6	0.01	0.788					0	4.96	0.01	0.01		0.879	0.788	0.745	-6.64	-6.64		-0.19	-0.34	-0.42	75245		822395	647737	134.31		96.22	90.78	12087.9	468387
FALSE	High	Master Protein	TGGT1_307810-t26_1-p1	transcript=TGGT1_307810-t26_1 | gene=TGGT1_307810 | organism=Toxoplasma_gondii_GT1 | gene_product=hypothetical protein | transcript_product=hypothetical protein | location=TGGT1_chrXII:366832-371762(-) | protein_length=433 | sequence_SO=chromosome | SO=protein_coding	0	31.841	21	5	14	5	1	433	45.2	9.52	18.67	5	100	2.802					0	55.06		100		2.802	3.842	0.586		6.64		1.49	1.94	-0.77		37091.9	272213	1.04591e+06			141.91	61.61					37091.9
FALSE	High	Master Protein	TGGT1_246580-t26_1-p1	transcript=TGGT1_246580-t26_1 | gene=TGGT1_246580 | organism=Toxoplasma_gondii_GT1 | gene_product=hypothetical protein | transcript_product=hypothetical protein | location=TGGT1_chrXII:2793978-2797673(+) | protein_length=383 | sequence_SO=chromosome | SO=protein_coding	0	31.752	26	7	14	7	1	383	42.8	4.73	12.97	7	0.01	1.16					0	5.46	0.099	0.01	0.01	1.16	1.366	1.117	-3.33	-6.64	-6.64	0.21	0.45	0.16	190858	8858.57	420560	510984	40.49		94.68	88.03	89289.3	190858	215517	8858.57
FALSE	High	Master Protein	TGGT1_266760-t26_1-p1	transcript=TGGT1_266760-t26_1 | gene=TGGT1_266760 | organism=Toxoplasma_gondii_GT1 | gene_product=isocitrate dehydrogenase | transcript_product=isocitrate dehydrogenase | location=TGGT1_chrIX:812189-815264(-) | protein_length=594 | sequence_SO=chromosome | SO=protein_coding	0	31.751	12	6	18	5	1	594	66.3	8.9	17.86	6	0.091	0.878					5.44	28.53	0.821	0.01		1.097	0.878	0.01	-0.29	-6.64		0.13	-0.19	-6.64	54300.3	43165.8	323205	263896	4.49		124.75	40.61	52604.4	56050.9		43165.8
FALSE	High	Master Protein	TGGT1_288750-t26_1-p1	transcript=TGGT1_288750-t26_1 | gene=TGGT1_288750 | organism=Toxoplasma_gondii_GT1 | gene_product=ubiquinol-cytochrome c reductase | transcript_product=ubiquinol-cytochrome c reductase | location=TGGT1_chrIX:2534185-2536581(+) | protein_length=234 | sequence_SO=chromosome | SO=protein_coding	0	31.744	31	4	12	4	1	234	26.7	9.16	22.02	4		1.956						66.01				1.956	2.826	0.809				0.97	1.5	-0.31			625474	1.22316e+06			116.32	58.53
FALSE	High	Master Protein	TGGT1_208560-t26_1-p1	transcript=TGGT1_208560-t26_1 | gene=TGGT1_208560 | organism=Toxoplasma_gondii_GT1 | gene_product=carrier superfamily protein | transcript_product=carrier superfamily protein | location=TGGT1_chrIb:794791-800321(-) | protein_length=670 | sequence_SO=chromosome | SO=protein_coding	0	31.612	13	7	13	7	1	670	72.3	9.69	19.39	7		0.01						0				0.01	0.01	0.489				-6.64	-6.64	-1.03			94885	769025			155.53
FALSE	High	Master Protein	TGGT1_282055-t26_1-p1	transcript=TGGT1_282055-t26_1 | gene=TGGT1_282055 | organism=Toxoplasma_gondii_GT1 | gene_product=protein phosphatase PP2C-hn | transcript_product=protein phosphatase PP2C-hn | location=TGGT1_chrVIIa:4262456-4267234(-) | protein_length=478 | sequence_SO=chromosome | SO=protein_coding	0	31.427	20	8	19	8	1	478	51.9	8.68	14.77	8	0.389	0.796					4.24	27.96	0.462	0.389	0.01	0.796	1.033	0.382	-1.11	-1.36	-6.64	-0.33	0.05	-1.39	112213	60647.8	717738	571506	87.44	44.9	102.04	50.91	182205	112213	7414.43	84265.7	43649.5
FALSE	High	Master Protein	TGGT1_235540-t26_1-p1	transcript=TGGT1_235540-t26_1 | gene=TGGT1_235540 | organism=Toxoplasma_gondii_GT1 | gene_product=putative eukaryotic initiation factor-2 beta | transcript_product=putative eukaryotic initiation factor-2 beta | location=TGGT1_chrX:4824505-4828067(-) | protein_length=231 | sequence_SO=chromosome | SO=protein_coding	0	31.426	22	6	32	6	1	231	26.2	9.07	37.88	6	0.647	0.711	0.698582	0.304924	0.760057	0.428997	36.47	35.03	0.647	2.442	0.267	0.711	1.043	0.309	-0.63	1.29	-1.9	-0.49	0.06	-1.7	671300	434472	2.70122e+06	1.26374e+06	53.01	49.56	29.79	57.24	671300	300496	995088	434472	733669
FALSE	High	Master Protein	TGGT1_259010-t26_1-p1	transcript=TGGT1_259010-t26_1 | gene=TGGT1_259010 | organism=Toxoplasma_gondii_GT1 | gene_product=putative vacuolar ATP synthase subunit d | transcript_product=putative vacuolar ATP synthase subunit d | location=TGGT1_chrVIIb:2988734-2994961(-) | protein_length=396 | sequence_SO=chromosome | SO=protein_coding	0	31.403	19	5	15	5	1	396	44.9	5.05	21.43	5	0.01	0.588					0	9.86	0.117	0.01	0.01	0.701	0.588	0.445	-3.09	-6.64	-6.64	-0.51	-0.77	-1.17	310574	26604.3	348871	220726	35.93		126.17	110.45	226716	463009	310574	26604.3
FALSE	High	Master Protein	TGGT1_319530-t26_1-p1	transcript=TGGT1_319530-t26_1 | gene=TGGT1_319530 | organism=Toxoplasma_gondii_GT1 | gene_product=splicing factor SF2 | transcript_product=splicing factor SF2 | location=TGGT1_chrIV:876124-882127(+) | protein_length=450 | sequence_SO=chromosome | SO=protein_coding	0	31.234	12	5	29	5	1	450	53.5	10.07	29.3	5	0.223	0.875					5.63	26.84	0.393	0.223	0.01	1.082	0.875	0.657	-1.35	-2.16	-6.64	0.11	-0.19	-0.61	127847	54798.6	2.05372e+06	1.37591e+06	62.24	12.12	39.81	29.26	127847	267704	78158.9	50286	59716.1
FALSE	High	Master Protein	TGGT1_219550-t26_1-p1	transcript=TGGT1_219550-t26_1 | gene=TGGT1_219550 | organism=Toxoplasma_gondii_GT1 | gene_product=dihydrolipoyllysine-residue succinyltransferase component of oxoglutarate dehydrogenase | transcript_product=dihydrolipoyllysine-residue succinyltransferase component of oxoglutarate dehydrogenase | location=TGGT1_chrXII:790088-797741(-) | protein_length=470 | sequence_SO=chromosome | SO=protein_codi…	0	31.218	26	6	22	6	1	470	50.1	8.95	16.61	6	1.366	0.513					23.18	16.76	1.169	1.596		0.513	0.733	0.192	0.23	0.67		-0.96	-0.45	-2.38	39719.7	54255.6	1.44027e+06	644691	50.34	30.15	61.85	12.5	57632.1	27374.6		67373	43692.2
FALSE	High	Master Protein	TGGT1_218260-t26_1-p1	transcript=TGGT1_218260-t26_1 | gene=TGGT1_218260 | organism=Toxoplasma_gondii_GT1 | gene_product=histone H3.3 | transcript_product=histone H3.3 | location=TGGT1_chrXII:1578063-1578473(+) | protein_length=136 | sequence_SO=chromosome | SO=protein_coding	0	31.089	24	5	139	5	1	136	15.4	11.3	167.51	5	0.79	0.74	0.054797	0.0771965	0.230857	0.198089	7.79	3.91	0.79	0.879	0.724	0.74	0.899	0.704	-0.34	-0.19	-0.47	-0.44	-0.15	-0.51	4.55802e+06	3.62283e+06	4.81575e+07	4.32983e+07	25.85	25.26	32.74	27.3	6.58835e+06	4.12317e+06	4.55802e+06	5.20809e+06	3.62283e+06
FALSE	High	Master Protein	TGGT1_235160-t26_1-p1	transcript=TGGT1_235160-t26_1 | gene=TGGT1_235160 | organism=Toxoplasma_gondii_GT1 | gene_product=hypothetical protein | transcript_product=hypothetical protein | location=TGGT1_chrX:4553113-4566152(-) | protein_length=1545 | sequence_SO=chromosome | SO=protein_coding	0	31.079	8	9	86	9	1	1545	168	6.28	72.71	9	100	100					0	0	100	100	100	100	100	1.817	6.64	6.64	6.64	6.64	6.64	0.86		4.29417e+06	567006	375688		10.44		107.99				3735412	4.29417e+06
FALSE	High	Master Protein	TGGT1_289330-t26_1-p1	transcript=TGGT1_289330-t26_1 | gene=TGGT1_289330 | organism=Toxoplasma_gondii_GT1 | gene_product=ubiquitin carboxyl-terminal hydrolase family 2 protein | transcript_product=ubiquitin carboxyl-terminal hydrolase family 2 protein | location=TGGT1_chrIX:3004463-3016618(+) | protein_length=2291 | sequence_SO=chromosome | SO=protein_coding	0	31.03	7	9	21	9	1	2291	247.6	6.01	16.62	9	0.775	0.911	0.903164	0.492917	0.927032	0.591501	19.69	51.03	2.573	0.775	0.603	0.911	1.289	0.225	1.36	-0.37	-0.73	-0.14	0.37	-2.15	731986	441693	198416	180678	79.57	63.92	132.32	51.6	68593.9	987069	731986	176477	764822
FALSE	High	Master Protein	TGGT1_230340-t26_1-p1	transcript=TGGT1_230340-t26_1 | gene=TGGT1_230340 | organism=Toxoplasma_gondii_GT1 | gene_product=hypothetical protein | transcript_product=hypothetical protein | location=TGGT1_chrVIII:711206-715922(+) | protein_length=949 | sequence_SO=chromosome | SO=protein_coding	0	30.996	13	7	13	7	1	949	102.3	7.23	13.73	7		1.142						1.33				1.142	1.152	0.208				0.19	0.2	-2.27			389925	294205			94.78	29.77
FALSE	High	Master Protein	TGGT1_254900-t26_1-p1	transcript=TGGT1_254900-t26_1 | gene=TGGT1_254900 | organism=Toxoplasma_gondii_GT1 | gene_product=putative proteasome subunit beta type 2 | transcript_product=putative proteasome subunit beta type 2 | location=TGGT1_chrIII:1997522-1998441(+) | protein_length=191 | sequence_SO=chromosome | SO=protein_coding	0	30.968	43	7	18	7	1	191	22	7.88	22.47	7	0.01	0.01					0	0	0.01	0.01	0.01	0.01	0.01	0.126	-6.64	-6.64	-6.64	-6.64	-6.64	-2.99	153347		1.82654e+06	642431	20.89		73.34		176530	115160	153347
FALSE	High	Master Protein	TGGT1_265530-t26_1-p1	transcript=TGGT1_265530-t26_1 | gene=TGGT1_265530 | organism=Toxoplasma_gondii_GT1 | gene_product=RNA recognition motif-containing protein | transcript_product=RNA recognition motif-containing protein | location=TGGT1_chrIX:1315868-1318933(-) | protein_length=492 | sequence_SO=chromosome | SO=protein_coding	0	30.902	14	5	19	5	1	492	51.5	5.48	19.15	5	0.01	0.844					0	1.72	0.304	0.01	0.01	1.093	0.844	0.83	-1.72	-6.64	-6.64	0.13	-0.24	-0.27	187080	61148.8	1.6169e+06	1.3647e+06	19.48		93.69	86.36	201271	187080	136447	61148.8
FALSE	High	Master Protein	TGGT1_204130-t26_1-p1	transcript=TGGT1_204130-t26_1 | gene=TGGT1_204130 | organism=Toxoplasma_gondii_GT1 | gene_product=perforin-like protein PLP1 | transcript_product=perforin-like protein PLP1 | location=TGGT1_chrVIIa:1864038-1872889(-) | protein_length=1161 | sequence_SO=chromosome | SO=protein_coding	0	30.867	12	9	12	9	1	1161	125.4	6.43	10.92	9	100	0.983					0	4.97	100	100		1.017	0.688	0.983	6.64	6.64		0.02	-0.54	-0.02		70250.8	425909	292987		134.78	121.51	129.64				10891.9	453105
FALSE	High	Master Protein	TGGT1_309560-t26_1-p1	transcript=TGGT1_309560-t26_1 | gene=TGGT1_309560 | organism=Toxoplasma_gondii_GT1 | gene_product=nmda receptor glutamate-binding chain | transcript_product=nmda receptor glutamate-binding chain | location=TGGT1_chrXI:687810-689596(+) | protein_length=265 | sequence_SO=chromosome | SO=protein_coding	0	30.852	15	3	64	3	1	265	29.3	6	94.2	3	11.154	1.09	0.00325926	0.3669	0.0738213	0.492419	5.26	16.82	7.659	11.55	11.154	0.966	1.09	1.528	2.94	3.53	3.48	-0.05	0.12	0.61	140256	1.07417e+06	2.28522e+06	2.49087e+06	24.75	26.83	39.23	64.55	140256	89919.7	146701	1.07417e+06	1.03856e+06
FALSE	High	Master Protein	TGGT1_217680-t26_1-p1	transcript=TGGT1_217680-t26_1 | gene=TGGT1_217680 | organism=Toxoplasma_gondii_GT1 | gene_product=hypothetical protein | transcript_product=hypothetical protein | location=TGGT1_chrXII:1930956-1942802(-) | protein_length=2213 | sequence_SO=chromosome | SO=protein_coding	0	30.611	8	11	11	11	1	2213	242.9	5.39	6.72	11	100	100					0	0		100		100	100	1.091		6.64		6.64	6.64	0.13		7132.76	1.70962e+06	254929				126.65					7132.76
FALSE	High	Master Protein	TGGT1_221320-t26_1-p1	transcript=TGGT1_221320-t26_1 | gene=TGGT1_221320 | organism=Toxoplasma_gondii_GT1 | gene_product=acetyl-CoA carboxylase ACC1 | transcript_product=acetyl-CoA carboxylase ACC1 | location=TGGT1_chrII:218988-235059(-) | protein_length=2614 | sequence_SO=chromosome | SO=protein_coding	0	30.565	6	11	12	11	1	2614	287.6	7.53	7.68	11	0.01	0.01					0	0	0.01		0.01	0.01	0.01	0.229	-6.64		-6.64	-6.64	-6.64	-2.13	216075		820916	188083	79.31		88.31		114614		407355
FALSE	High	Master Protein	TGGT1_286750-t26_1-p1	transcript=TGGT1_286750-t26_1 | gene=TGGT1_286750 | organism=Toxoplasma_gondii_GT1 | gene_product=MA3 domain-containing protein | transcript_product=MA3 domain-containing protein | location=TGGT1_chrV:1543494-1550842(+) | protein_length=515 | sequence_SO=chromosome | SO=protein_coding	0	30.517	18	8	13	8	1	515	58.9	5.03	11.45	8	0.058	0.706					1.39	11.5	0.01	0.334		0.596	0.706	0.822	-6.64	-1.58		-0.75	-0.5	-0.28	47815.9	20214	493529	348363	32.77		120.02	128.84	37764.6	60542.4			20214
FALSE	High	Master Protein	TGGT1_258950-t26_1-p1	transcript=TGGT1_258950-t26_1 | gene=TGGT1_258950 | organism=Toxoplasma_gondii_GT1 | gene_product=lectin family protein | transcript_product=lectin family protein | location=TGGT1_chrVIIb:3040792-3044811(+) | protein_length=646 | sequence_SO=chromosome | SO=protein_coding	0	30.479	18	7	14	7	1	646	70.3	7.36	19.12	7	2.158	0.735					0	39.62	2.158			0.735	1.12	0.371	1.11			-0.44	0.16	-1.43	10238	22089.2	318319	356614			136.44	97.08	10238			22089.2
FALSE	High	Master Protein	TGGT1_271888-t26_1-p1	transcript=TGGT1_271888-t26_1 | gene=TGGT1_271888 | organism=Toxoplasma_gondii_GT1 | gene_product=putative 3-ketoacyl-CoA reductase | transcript_product=putative 3-ketoacyl-CoA reductase | location=TGGT1_chrVIII:4294988-4299861(-) | protein_length=342 | sequence_SO=chromosome | SO=protein_coding	0	30.47	18	5	12	5	1	342	37.5	9.26	22.93	5	100	0.782					0	16.9	100	100	100	1.779	0.637	0.782	6.64	6.64	6.64	0.83	-0.65	-0.35		14363.3	943864	600904		151.25	82.04	67.79				6348	223472
FALSE	High	Master Protein	TGGT1_300310-t26_1-p1	transcript=TGGT1_300310-t26_1 | gene=TGGT1_300310 | organism=Toxoplasma_gondii_GT1 | gene_product=26S proteasome regulatory subunit, S6a family AAA ATpase | transcript_product=26S proteasome regulatory subunit, S6a family AAA ATpase | location=TGGT1_chrXII:55218-62332(-) | protein_length=427 | sequence_SO=chromosome | SO=protein_coding	0	30.43	34	9	12	9	1	427	47.8	5.3	16.94	9	0.027	0.489					0.13	3.68	0.073		0.01	0.821	0.489	0.439	-3.78		-6.64	-0.29	-1.03	-1.19	36131.2	4154.46	509409	252282	60.32		131.63	118.33	56983.8		22909.4	4154.46
FALSE	High	Master Protein	TGGT1_226970-t26_1-p1	transcript=TGGT1_226970-t26_1 | gene=TGGT1_226970 | organism=Toxoplasma_gondii_GT1 | gene_product=ribosomal protein RPS11 | transcript_product=ribosomal protein RPS11 | location=TGGT1_chrX:1087439-1090315(-) | protein_length=161 | sequence_SO=chromosome | SO=protein_coding	0	30.379	31	5	81	5	1	161	18.7	10.61	133.42	5	0.509	0.927	0.233296	0.522355	0.365599	0.617741	11.07	22.59	0.509	0.363	1.071	0.927	1.105	0.763	-0.97	-1.46	0.1	-0.11	0.14	-0.39	1.09504e+06	700912	6.90715e+06	7.62975e+06	33.99	65.92	60.16	42.19	1.37603e+06	669326	1.09504e+06	700912	242780
FALSE	High	Master Protein	TGGT1_291950-t26_1-p1	transcript=TGGT1_291950-t26_1 | gene=TGGT1_291950 | organism=Toxoplasma_gondii_GT1 | gene_product=RNA recognition motif-containing protein | transcript_product=RNA recognition motif-containing protein | location=TGGT1_chrIX:4225895-4238503(-) | protein_length=725 | sequence_SO=chromosome | SO=protein_coding	0	30.368	13	6	31	6	1	725	73.8	6.49	34.16	6	13.699	0.787	0.00343776	0.374281	0.0738213	0.499041	37.91	35.24	10.196	17.278	13.699	0.787	0.485	1.134	3.35	4.11	3.78	-0.35	-1.04	0.18	127805	1.30314e+06	591337	465399	52.78	47.05	37.99	76.11	127805	41211.6	142922	1.30314e+06	712067
FALSE	High	Master Protein	TGGT1_312600-t26_1-p1	transcript=TGGT1_312600-t26_1 | gene=TGGT1_312600 | organism=Toxoplasma_gondii_GT1 | gene_product=heat shock protein HSP21 | transcript_product=heat shock protein HSP21 | location=TGGT1_chrXI:2781847-2783667(+) | protein_length=195 | sequence_SO=chromosome | SO=protein_coding	0	30.299	31	3	18	3	1	195	21.3	6.61	25.25	3	0.492	0.657					35.17	2.48	0.492	2.17	0.01	0.657	0.813	0.632	-1.02	1.12	-6.64	-0.61	-0.3	-0.66	112630	88777.4	2.46705e+06	1.68113e+06	36.85	47.29	16.26	9.7	127409	57931.2	112630	62698.8	125703
FALSE	High	Master Protein	TGGT1_232830-t26_1-p1	transcript=TGGT1_232830-t26_1 | gene=TGGT1_232830 | organism=Toxoplasma_gondii_GT1 | gene_product=putative vacuolar proton translocating ATPase subunit A | transcript_product=putative vacuolar proton translocating ATPase subunit A | location=TGGT1_chrVIII:2275918-2280585(-) | protein_length=909 | sequence_SO=chromosome | SO=protein_coding	0	30.261	9	6	26	6	1	909	101.1	5.35	34.49	6	100	0.622					0	4.58	100	100	100	0.622	0.572	1.517	6.64	6.64	6.64	-0.69	-0.81	0.6		973158	76779.1	43944.1		62.51	148.34	162.85				553510	1.97292e+06
FALSE	High	Master Protein	TGGT1_209720-t26_1-p1	transcript=TGGT1_209720-t26_1 | gene=TGGT1_209720 | organism=Toxoplasma_gondii_GT1 | gene_product=hypothetical protein | transcript_product=hypothetical protein | location=TGGT1_chrIb:1427445-1428943(+) | protein_length=218 | sequence_SO=chromosome | SO=protein_coding	0	30.224	22	4	12	4	1	218	23.4	8.12	20.06	4	0.08	0.989					3.76	38.71	0.643	0.01		21.139	0.989	0.725	-0.64	-6.64		4.4	-0.02	-0.46	131306	104866	604817	598279	30.22		129.88	88.16	163136	105686		104866
FALSE	High	Master Protein	TGGT1_227960-t26_1-p1	transcript=TGGT1_227960-t26_1 | gene=TGGT1_227960 | organism=Toxoplasma_gondii_GT1 | gene_product=PCI domain-containing protein | transcript_product=PCI domain-containing protein | location=TGGT1_chrX:612917-615688(-) | protein_length=506 | sequence_SO=chromosome | SO=protein_coding	0	30.216	14	6	13	6	1	506	55.6	6.38	23.62	6		0.72						3.65				0.686	0.72	0.938				-0.54	-0.47	-0.09			533395	384006			98.01	111.96
FALSE	High	Master Protein	TGGT1_229950-t26_1-p1	transcript=TGGT1_229950-t26_1 | gene=TGGT1_229950 | organism=Toxoplasma_gondii_GT1 | gene_product=putative 26S proteasome regulatory subunit 6b | transcript_product=putative 26S proteasome regulatory subunit 6b | location=TGGT1_chrVIII:482161-488358(+) | protein_length=409 | sequence_SO=chromosome | SO=protein_coding	0	29.846	24	7	17	7	1	409	46.1	6.13	18.49	7	27.016	0.837					254.37	12.93	7.299	100		0.941	0.837	0.134	2.87	6.64		-0.09	-0.26	-2.9	6836.65	27359	1.19576e+06	770790		76.05	60.75	46.95	6836.65			49898.4	15000.8
FALSE	High	Master Protein	TGGT1_214490-t26_1-p1	transcript=TGGT1_214490-t26_1 | gene=TGGT1_214490 | organism=Toxoplasma_gondii_GT1 | gene_product=peptidase M16 inactive domain-containing protein | transcript_product=peptidase M16 inactive domain-containing protein | location=TGGT1_chrX:6200575-6209880(-) | protein_length=1353 | sequence_SO=chromosome | SO=protein_coding	0	29.788	9	7	9	7	1	1353	148.8	5.33	13.97	7		100						0				100	100	2.068				6.64	6.64	1.05			2.19842e+06	106792				166.75
FALSE	High	Master Protein	TGGT1_240860-t26_1-p1	transcript=TGGT1_240860-t26_1 | gene=TGGT1_240860 | organism=Toxoplasma_gondii_GT1 | gene_product=acyltransferase domain-containing protein | transcript_product=acyltransferase domain-containing protein | location=TGGT1_chrVI:1452612-1456058(-) | protein_length=281 | sequence_SO=chromosome | SO=protein_coding	0	29.65	23	4	12	4	1	281	31.8	8.85	16.05	4		0.944						0.66				0.944	0.949	0.501				-0.08	-0.08	-1			268063	254367			129.95	102.12
FALSE	High	Master Protein	TGGT1_319350-t26_1-p1	transcript=TGGT1_319350-t26_1 | gene=TGGT1_319350 | organism=Toxoplasma_gondii_GT1 | gene_product=SAG-related sequence SRS17B | transcript_product=SAG-related sequence SRS17B | location=TGGT1_chrIV:957373-958987(+) | protein_length=379 | sequence_SO=chromosome | SO=protein_coding	0	29.611	16	5	20	5	1	379	39.4	5.02	29.33	5	0.022	0.537					0.06	4.9	0.048	0.01		0.537	0.475	0.622	-4.39	-6.64		-0.9	-1.07	-0.68	181200	6349.19	1.28098e+06	608345	42.5		108.8	118.82	132888	247075		6349.19
FALSE	High	Master Protein	TGGT1_211040-t26_1-p1	transcript=TGGT1_211040-t26_1 | gene=TGGT1_211040 | organism=Toxoplasma_gondii_GT1 | gene_product=Sec61beta family protein | transcript_product=Sec61beta family protein | location=TGGT1_chrIV:1885778-1887505(+) | protein_length=99 | sequence_SO=chromosome | SO=protein_coding	0	29.583	57	4	43	4	1	99	10.1	10.87	42.44	4	0.136	0.965					18.74	29.35	0.01	1.863		0.965	1.17	0.701	-6.64	0.9		-0.05	0.23	-0.51	128174	116267	2.13094e+06	2.49313e+06	87.2		70.16	44.34	263203	62417.5			116267
FALSE	High	Master Protein	TGGT1_202200-t26_1-p1	transcript=TGGT1_202200-t26_1 | gene=TGGT1_202200 | organism=Toxoplasma_gondii_GT1 | gene_product=hypothetical protein | transcript_product=hypothetical protein | location=TGGT1_chrVIIa:3420532-3424661(-) | protein_length=793 | sequence_SO=chromosome | SO=protein_coding	0	29.576	11	8	20	8	1	793	87.1	8.13	4.13	8	1.741	0.809					43.23	42.27	1.233	1.741	100	1.206	0.809	0.457	0.3	0.8	6.64	0.27	-0.31	-1.13	20647.5	23884	695141	562331	81.57	53.42	80.2	38.04	39856	10696.5		49151.1	18620.4
FALSE	High	Master Protein	TGGT1_259710-t26_1-p1	transcript=TGGT1_259710-t26_1 | gene=TGGT1_259710 | organism=Toxoplasma_gondii_GT1 | gene_product=protein kinase | transcript_product=protein kinase | location=TGGT1_chrVIIb:2674298-2677675(+) | protein_length=251 | sequence_SO=chromosome | SO=protein_coding	0	29.539	16	4	10	4	1	251	29	6.18	20.24	4	0.01	0.01					0	0			0.01	0.01	0.01	0.785			-6.64	-6.64	-6.64	-0.35	63713.3		76331.4	957135			156.7				63713.3
FALSE	High	Master Protein	TGGT1_314970-t26_1-p1	transcript=TGGT1_314970-t26_1 | gene=TGGT1_314970 | organism=Toxoplasma_gondii_GT1 | gene_product=root hair defective 3 gtp-binding protein (rhd3) protein | transcript_product=root hair defective 3 gtp-binding protein (rhd3) protein | location=TGGT1_chrXI:4386163-4399801(-) | protein_length=893 | sequence_SO=chromosome | SO=protein_coding	0	29.424	12	8	13	8	1	893	98	5.88	15.28	8	0.01	0.55					0	12.51	0.01	0.01	0.01	0.703	0.55	0.309	-6.64	-6.64	-6.64	-0.51	-0.86	-1.69	188388		469919	330481	91.37		110.51	71.73	52599.7	188388	484938
FALSE	High	Master Protein	TGGT1_226570-t26_1-p1	transcript=TGGT1_226570-t26_1 | gene=TGGT1_226570 | organism=Toxoplasma_gondii_GT1 | gene_product=hypothetical protein | transcript_product=hypothetical protein | location=TGGT1_chrX:1439365-1440887(-) | protein_length=139 | sequence_SO=chromosome | SO=protein_coding	0	29.379	52	3	23	3	1	139	15	5.36	30.59	3	0.245	1					8.53	3.03	0.245	100	0.01	1.021	1	0.577	-2.03	6.64	-6.64	0.03	0	-0.79	130967	64292.8	635665	635711	83.9	1.81	55.07	19.29	259197		66175	63476.9	65119.3
FALSE	High	Master Protein	TGGT1_254880-t26_1-p1	transcript=TGGT1_254880-t26_1 | gene=TGGT1_254880 | organism=Toxoplasma_gondii_GT1 | gene_product=Alpha-galactosidase | transcript_product=Alpha-galactosidase | location=TGGT1_chrIII:1983229-1990947(+) | protein_length=747 | sequence_SO=chromosome | SO=protein_coding	0	29.253	10	6	11	6	1	747	81.8	6.73	18.28	6	0.244	1.29	0.163755	0.331548	0.303692	0.453931	7.34	10.31	0.447	0.244	0.02	1.29	1.38	0.914	-1.16	-2.04	-5.61	0.37	0.46	-0.13	492266	102731	386868	533888	64.09	67.12	114.93	95.99	229952	492266	927784	102731	120072
FALSE	High	Master Protein	TGGT1_237250-t26_1-p1	transcript=TGGT1_237250-t26_1 | gene=TGGT1_237250 | organism=Toxoplasma_gondii_GT1 | gene_product=hypothetical protein | transcript_product=hypothetical protein | location=TGGT1_chrX:5697810-5699972(+) | protein_length=259 | sequence_SO=chromosome | SO=protein_coding	0	29.233	32	5	13	5	1	259	28.5	8.98	14.26	5		0.648						2.86				0.618	0.867	0.648				-0.69	-0.21	-0.63			374474	324656			135.15	129.8
FALSE	High	Master Protein	TGGT1_230520-t26_1-p1	transcript=TGGT1_230520-t26_1 | gene=TGGT1_230520 | organism=Toxoplasma_gondii_GT1 | gene_product=putative cyclophilin 1 | transcript_product=putative cyclophilin 1 | location=TGGT1_chrVIII:844576-845289(+) | protein_length=237 | sequence_SO=chromosome | SO=protein_coding	0	29.219	32	7	25	7	1	237	26.2	8.47	14.06	7	0.603	0.653	0.178607	0.0813249	0.312754	0.202256	24.44	10.13	0.603	0.878	0.329	0.455	0.757	0.653	-0.73	-0.19	-1.6	-1.14	-0.4	-0.62	302302	265565	2.4682e+06	1.56822e+06	67.09	72.68	65.23	71.67	533409	302302	110712	321410	265565
FALSE	High	Master Protein	TGGT1_228190-t26_1-p1	transcript=TGGT1_228190-t26_1 | gene=TGGT1_228190 | organism=Toxoplasma_gondii_GT1 | gene_product=putative eukaryotic initiation factor-3, subunit 5 | transcript_product=putative eukaryotic initiation factor-3, subunit 5 | location=TGGT1_chrX:414529-416813(+) | protein_length=346 | sequence_SO=chromosome | SO=protein_coding	0	29.163	24	6	22	6	1	346	38	6.52	18.35	6	0.686	0.711	0.8888	0.0308613	0.920258	0.161762	22.5	7.41	4.359	0.464	0.686	0.628	0.781	0.711	2.12	-1.11	-0.54	-0.67	-0.36	-0.49	303862	171886	920449	718937	73.32	11.84	132.24	132.48	39432.7	365471	303862	171886	169725
FALSE	High	Master Protein	TGGT1_305290-t26_1-p1	transcript=TGGT1_305290-t26_1 | gene=TGGT1_305290 | organism=Toxoplasma_gondii_GT1 | gene_product=putative vacuolar atp synthase subunit e | transcript_product=putative vacuolar atp synthase subunit e | location=TGGT1_chrIX:5114879-5118006(-) | protein_length=345 | sequence_SO=chromosome | SO=protein_coding	0	29.15	21	8	29	8	1	345	39.1	9.1	48.42	8	0.81	1.09					96.01	3.12	1.632	0.81	0.01	1.113	1.09	1.034	0.71	-0.3	-6.64	0.15	0.12	0.05	72849.5	102591	2.22207e+06	2.42136e+06	27.22	71.14	47.11	43.04	109311	72849.5	67726	178417	58990.6
FALSE	High	Master Protein	TGGT1_245670-t26_1-p1	transcript=TGGT1_245670-t26_1 | gene=TGGT1_245670 | organism=Toxoplasma_gondii_GT1 | gene_product=pyruvate dehydrogenase complex subunit PDH-E1Alpha | transcript_product=pyruvate dehydrogenase complex subunit PDH-E1Alpha | location=TGGT1_chrXII:2396583-2400897(+) | protein_length=635 | sequence_SO=chromosome | SO=protein_coding	0	28.867	14	6	14	6	1	635	67.4	8.7	18.38	6	0.01	0.01					0	0	0.01	0.01		0.01	0.01	0.238	-6.64	-6.64		-6.64	-6.64	-2.07	19285.3		546849	574393	94.27		106.42		8626.05	43116.1
FALSE	High	Master Protein	TGGT1_209290-t26_1-p1	transcript=TGGT1_209290-t26_1 | gene=TGGT1_209290 | organism=Toxoplasma_gondii_GT1 | gene_product=ribosomal protein RPS28 | transcript_product=ribosomal protein RPS28 | location=TGGT1_chrIb:1207027-1207383(-) | protein_length=118 | sequence_SO=chromosome | SO=protein_coding	0	28.636	21	2	50	2	1	118	13.2	10.76	105.5	2	0.972	0.729	0.365755	0.0326867	0.481381	0.161762	2.7	4.04	0.972	0.991	0.696	0.829	0.691	0.729	-0.04	-0.01	-0.52	-0.27	-0.53	-0.46	493333	479699	6.46914e+06	4.47104e+06	35.65	19.43	66.17	63.86	493333	342485	707474	479699	339430
FALSE	High	Master Protein	TGGT1_306330-t26_1-p1	transcript=TGGT1_306330-t26_1 | gene=TGGT1_306330 | organism=Toxoplasma_gondii_GT1 | gene_product=phospholipase | transcript_product=phospholipase | location=TGGT1_chrIX:5748642-5751422(+) | protein_length=582 | sequence_SO=chromosome | SO=protein_coding	0	28.628	14	7	9	7	1	582	63.2	5.59	13.76	7	0.01	0.01					0	0	0.01	0.01		0.01	0.01	0.303	-6.64	-6.64		-6.64	-6.64	-1.72	15151.7		262460	612132	76.76		128.35		8248.29	27833
FALSE	High	Master Protein	TGGT1_201840-t26_1-p1	transcript=TGGT1_201840-t26_1 | gene=TGGT1_201840 | organism=Toxoplasma_gondii_GT1 | gene_product=aspartyl protease ASP1 | transcript_product=aspartyl protease ASP1 | location=TGGT1_chrVIIa:3648103-3654235(+) | protein_length=619 | sequence_SO=chromosome | SO=protein_coding	0	28.566	16	6	8	6	1	619	66.9	6.62	8.19	6	0.01	0.644					0	27.74	0.01	0.01	0.01	0.644	1.039	0.353	-6.64	-6.64	-6.64	-0.63	0.05	-1.5	15859.2		82735.4	59920.4	94.85		142.95	113.12	15859.2	10483.5	60496.8
FALSE	High	Master Protein	TGGT1_289530-t26_1-p1	transcript=TGGT1_289530-t26_1 | gene=TGGT1_289530 | organism=Toxoplasma_gondii_GT1 | gene_product=ribosomal protein RPL19 | transcript_product=ribosomal protein RPL19 | location=TGGT1_chrIX:3095967-3098521(-) | protein_length=187 | sequence_SO=chromosome | SO=protein_coding	0	28.559	19	3	53	3	1	187	22.1	11.15	83.89	3	0.804	0.796	0.128833	0.382976	0.280298	0.505678	11.21	37	0.804	0.898	0.63	0.796	1.138	0.482	-0.31	-0.15	-0.67	-0.33	0.19	-1.05	441040	396118	5.55967e+06	4.80582e+06	24.51	32.05	48.83	34.46	643486	441040	421213	517414	396118
FALSE	High	Master Protein	TGGT1_312090-t26_1-p1	transcript=TGGT1_312090-t26_1 | gene=TGGT1_312090 | organism=Toxoplasma_gondii_GT1 | gene_product=ribosomal protein RPL23 | transcript_product=ribosomal protein RPL23 | location=TGGT1_chrXI:2381590-2383685(-) | protein_length=139 | sequence_SO=chromosome | SO=protein_coding	0	28.523	38	4	36	4	1	139	14.8	9.91	33.29	4	0.225	0.409	0.0326765	0.00398756	0.200625	0.147902	1.17	1.89	0.26	0.225	0.092	0.458	0.377	0.409	-1.95	-2.15	-3.43	-1.13	-1.41	-1.29	306704	33136.5	3.06972e+06	1226609	47.73	80.61	109.03	108.28	427012	147527	306704	110861	33136.5
FALSE	High	Master Protein	TGGT1_230850-t26_1-p1	transcript=TGGT1_230850-t26_1 | gene=TGGT1_230850 | organism=Toxoplasma_gondii_GT1 | gene_product=hypothetical protein | transcript_product=hypothetical protein | location=TGGT1_chrVIII:1056415-1058913(+) | protein_length=476 | sequence_SO=chromosome | SO=protein_coding	0	28.339	14	6	16	6	1	476	50.5	8.25	15.59	6	100	1.305					0	27.49	100			1.305	1.547	0.379	6.64			0.38	0.63	-1.4		7758.23	353081	546323			120.26	46.99				7758.23
FALSE	High	Master Protein	TGGT1_269980-t26_1-p1	transcript=TGGT1_269980-t26_1 | gene=TGGT1_269980 | organism=Toxoplasma_gondii_GT1 | gene_product=putative preprotein translocase Sec61 | transcript_product=putative preprotein translocase Sec61 | location=TGGT1_chrVIII:5481592-5486135(-) | protein_length=473 | sequence_SO=chromosome | SO=protein_coding	0	28.11	10	6	39	6	1	473	52.1	8.81	47.23	6	0.203	0.428					2.58	1.42	0.203	0.289	0.01	0.266	0.428	0.451	-2.3	-1.79	-6.64	-1.91	-1.22	-1.15	185899	62994.1	3.5949e+06	1.53926e+06	48.31	22.53	56.69	74.02	364792	185899	154290	73972.3	53645.2
FALSE	High	Master Protein	TGGT1_208530-t26_1-p1	transcript=TGGT1_208530-t26_1 | gene=TGGT1_208530 | organism=Toxoplasma_gondii_GT1 | gene_product=nicotinate phosphoribosyltransferase | transcript_product=nicotinate phosphoribosyltransferase | location=TGGT1_chrIb:766715-777045(+) | protein_length=589 | sequence_SO=chromosome | SO=protein_coding	0	28.107	15	7	12	7	1	589	65.5	7.14	15.73	7	0.317	0.808					6.64	5.45	0.317	0.175	100	0.808	0.762	1.071	-1.66	-2.51	6.64	-0.31	-0.39	0.1	90912.8	66728.5	711740	575062	111.15	78.98	41.2	61.26	262602	31474		83179.6	5521.96
FALSE	High	Master Protein	TGGT1_239760-t26_1-p1	transcript=TGGT1_239760-t26_1 | gene=TGGT1_239760 | organism=Toxoplasma_gondii_GT1 | gene_product=ribosomal protein RPL22 | transcript_product=ribosomal protein RPL22 | location=TGGT1_chrVI:893982-895795(-) | protein_length=133 | sequence_SO=chromosome | SO=protein_coding	0	28.083	41	5	56	5	1	133	15.1	9.89	76.26	5	0.943	0.621	0.162272	0.145843	0.303692	0.270472	2.27	15.98	0.995	0.943	0.927	0.332	0.794	0.621	-0.01	-0.08	-0.11	-1.59	-0.33	-0.69	800610	742043	6.69685e+06	5.31882e+06	55.89	58.18	26.95	47.59	1.05893e+06	277483	800610	1.05383e+06	261697
FALSE	High	Master Protein	TGGT1_260820-t26_1-p1	transcript=TGGT1_260820-t26_1 | gene=TGGT1_260820 | organism=Toxoplasma_gondii_GT1 | gene_product=IMC sub-compartment protein ISP1 | transcript_product=IMC sub-compartment protein ISP1 | location=TGGT1_chrVIIb:2000787-2002966(-) | protein_length=176 | sequence_SO=chromosome | SO=protein_coding	0	28.051	21	4	32	4	1	176	19.4	7.69	21.74	4	3.777	0.71	0.0346839	0.0672126	0.200625	0.185022	54.04	9.14	2.4	3.777	5.746	0.797	0.558	0.71	1.26	1.92	2.52	-0.33	-0.84	-0.49	165131	622419	2.87841e+06	1.60617e+06	14.74	33.11	58.72	61.84	210989	164785	165131	506477	622419
FALSE	High	Master Protein	TGGT1_228490-t26_1-p1	transcript=TGGT1_228490-t26_1 | gene=TGGT1_228490 | organism=Toxoplasma_gondii_GT1 | gene_product=hypothetical protein | transcript_product=hypothetical protein | location=TGGT1_chrX:200935-204627(-) | protein_length=394 | sequence_SO=chromosome | SO=protein_coding	0	28.011	21	6	22	6	1	394	43.2	4.69	41.96	6	0.01	0.458					0	0.08	0.01	0.01	0.01	0.456	0.551	0.458	-6.64	-6.64	-6.64	-1.13	-0.86	-1.13	73977.2		613589	338098	60.44		87.19	81.44	83371.7	73977.2	18018.2
FALSE	High	Master Protein	TGGT1_202390-t26_1-p1	transcript=TGGT1_202390-t26_1 | gene=TGGT1_202390 | organism=Toxoplasma_gondii_GT1 | gene_product=S15 sporozoite-expressed protein | transcript_product=S15 sporozoite-expressed protein | location=TGGT1_chrVIIa:3261261-3263894(-) | protein_length=587 | sequence_SO=chromosome | SO=protein_coding	0	28.002	13	7	19	7	1	587	61.9	5.01	12.99	7	0.01	0.71					0	12.44	0.304	0.01	0.01	0.71	0.828	0.485	-1.72	-6.64	-6.64	-0.49	-0.27	-1.04	136361	93313.8	1.7709e+06	1.34882e+06	67.24		74.92	45.83	307104	136361	81489.7	93313.8
FALSE	High	Master Protein	TGGT1_267500-t26_1-p1	transcript=TGGT1_267500-t26_1 | gene=TGGT1_267500 | organism=Toxoplasma_gondii_GT1 | gene_product=hypothetical protein | transcript_product=hypothetical protein | location=TGGT1_chrIX:444584-445921(+) | protein_length=230 | sequence_SO=chromosome | SO=protein_coding	0	27.939	27	5	29	5	1	230	25.7	6.95	15.77	5	0.286	0.601					4.76	11.89	0.419	0.195		0.601	0.735	0.369	-1.25	-2.36		-0.73	-0.44	-1.44	164832	47154.9	2.12705e+06	1.38156e+06	6.23	46.14	54.55	36.17	157721	172263		66161.7	33608.3
FALSE	High	Master Protein	TGGT1_273560-t26_1-p1	transcript=TGGT1_273560-t26_1 | gene=TGGT1_273560 | organism=Toxoplasma_gondii_GT1 | gene_product=putative kinesin heavy chain | transcript_product=putative kinesin heavy chain | location=TGGT1_chrVIII:3381230-3400326(-) | protein_length=1641 | sequence_SO=chromosome | SO=protein_coding	0	27.911	5	7	19	7	1	1641	181.3	6.4	47.37	7	100	1.173					0	8.84	100	54.952	100	1.173	1.243	0.95	6.64	5.78	6.64	0.23	0.31	-0.07	69912.8	3841863	284195	353328		45.78	94.32	80.52		69912.8		7.30659e+06	3841863
FALSE	High	Master Protein	TGGT1_289580-t26_1-p1	transcript=TGGT1_289580-t26_1 | gene=TGGT1_289580 | organism=Toxoplasma_gondii_GT1 | gene_product=strictosidine synthase subfamily protein | transcript_product=strictosidine synthase subfamily protein | location=TGGT1_chrIX:3140429-3145862(-) | protein_length=456 | sequence_SO=chromosome | SO=protein_coding	0	27.851	16	6	14	6	1	456	49.4	8.57	10.37	6	0.01	0.01					0	0	0.01			0.01	0.01	0.216	-6.64			-6.64	-6.64	-2.21	45609.5		404453	318973			113.37		45609.5
FALSE	High	Master Protein	TGGT1_229140-t26_1-p1	transcript=TGGT1_229140-t26_1 | gene=TGGT1_229140 | organism=Toxoplasma_gondii_GT1 | gene_product=MaoC family domain-containing protein | transcript_product=MaoC family domain-containing protein | location=TGGT1_chrVIII:43288-48332(-) | protein_length=324 | sequence_SO=chromosome | SO=protein_coding	0	27.726	22	6	19	6	1	324	35.9	7.66	19.77	6	0.019	0.234					0.04	3.12	0.038	0.01		0.324	0.234	0.055	-4.73	-6.64		-1.63	-2.09	-4.19	352035	12019.5	1.78223e+06	406364	14.29		73.32	31.65	318089	389605		12019.5
FALSE	High	Master Protein	TGGT1_229920-t26_1-p1	transcript=TGGT1_229920-t26_1 | gene=TGGT1_229920 | organism=Toxoplasma_gondii_GT1 | gene_product=hypothetical protein | transcript_product=hypothetical protein | location=TGGT1_chrVIII:465698-467668(-) | protein_length=307 | sequence_SO=chromosome | SO=protein_coding	0	27.569	22	5	12	5	1	307	34.9	8.75	15.36	5	1.27	0.544					141.21	8.02	100	0.06	1.27	0.01	0.544	0.643	6.64	-4.05	0.34	-6.64	-0.88	-0.64	80215.8	8198.33	1.03398e+06	892613	17.05	147.82	57.06	61.12		71063.9	90546.4	8198.33	4292.82
FALSE	High	Master Protein	TGGT1_205580-t26_1-p1	transcript=TGGT1_205580-t26_1 | gene=TGGT1_205580 | organism=Toxoplasma_gondii_GT1 | gene_product=nuclear factor NF4 | transcript_product=nuclear factor NF4 | location=TGGT1_chrVIIa:1205711-1209756(+) | protein_length=497 | sequence_SO=chromosome | SO=protein_coding	0	27.526	14	5	7	5	1	497	51.2	8.29	15.53	5		0.07						2.49				0.01		0.489				-6.64		-1.03			185747	1.40337e+06			140.24
FALSE	High	Master Protein	TGGT1_257740-t26_1-p1	transcript=TGGT1_257740-t26_1 | gene=TGGT1_257740 | organism=Toxoplasma_gondii_GT1 | gene_product=UMP-CMP kinase | transcript_product=UMP-CMP kinase | location=TGGT1_chrVIIb:3792151-3795188(-) | protein_length=462 | sequence_SO=chromosome | SO=protein_coding	0	27.406	17	6	12	6	1	462	51	8.4	13.65	6	0.501	1.294					0	86.96	0.501			1.294	4.144	0.535	-1			0.37	2.05	-0.9	33249.5	16665.9	578712	1.33333e+06			108.24	75.51	33249.5			16665.9
FALSE	High	Master Protein	TGGT1_212300-t26_1-p1	transcript=TGGT1_212300-t26_1 | gene=TGGT1_212300 | organism=Toxoplasma_gondii_GT1 | gene_product=hypothetical protein | transcript_product=hypothetical protein | location=TGGT1_chrX:3837742-3842895(+) | protein_length=683 | sequence_SO=chromosome | SO=protein_coding	0	27.222	10	6	13	6	1	683	75.6	6.51	11.99	6	0.01	1.359					0	15.49	0.01			1.359	1.523	1.217	-6.64			0.44	0.61	0.28	6414.89		275416	419363			83.75	73.88	6414.89
FALSE	High	Master Protein	TGGT1_300280-t26_1-p1	transcript=TGGT1_300280-t26_1 | gene=TGGT1_300280 | organism=Toxoplasma_gondii_GT1 | gene_product=LSM domain-containing protein | transcript_product=LSM domain-containing protein | location=TGGT1_chrXII:70960-73566(-) | protein_length=169 | sequence_SO=chromosome | SO=protein_coding	0	27.188	35	5	23	5	1	169	17.9	10.92	13.76	5	0.01	0.863					0	5.58	0.01	0.01		0.863	0.906	0.273	-6.64	-6.64		-0.21	-0.14	-1.87	60183.4		1.26562e+06	1.09207e+06	6.97		94.84	21.84	57285.6	63227.8
FALSE	High	Master Protein	TGGT1_214210-t26_1-p1	transcript=TGGT1_214210-t26_1 | gene=TGGT1_214210 | organism=Toxoplasma_gondii_GT1 | gene_product=rRNA pseudouridine synthase | transcript_product=rRNA pseudouridine synthase | location=TGGT1_chrX:6002905-6008379(-) | protein_length=505 | sequence_SO=chromosome | SO=protein_coding	0	27.092	19	6	17	6	1	505	56.7	9	10.5	6	0.01	0.616					0	3.86	0.01	0.01	0.01	0.658	0.616	0.407	-6.64	-6.64	-6.64	-0.6	-0.7	-1.3	175491		1.29333e+06	851053	105.71		41.23	17.02	175491	90956.3	748060
FALSE	High	Master Protein	TGGT1_269840-t26_1-p1	transcript=TGGT1_269840-t26_1 | gene=TGGT1_269840 | organism=Toxoplasma_gondii_GT1 | gene_product=proteasome regulatory subunit | transcript_product=proteasome regulatory subunit | location=TGGT1_chrVIII:5579434-5582614(-) | protein_length=314 | sequence_SO=chromosome | SO=protein_coding	0	27.065	21	5	18	5	1	314	35.2	6.54	20.98	5	9.633	0.807					762.43	8.46	0.928	100		0.737	0.807	1.25	-0.11	6.64		-0.44	-0.31	0.32	15024.1	47858.6	1.12185e+06	905626		119.3	31.75	62.84	15024.1			13940.7	164299
FALSE	High	Master Protein	TGGT1_310950-t26_1-p1	transcript=TGGT1_310950-t26_1 | gene=TGGT1_310950 | organism=Toxoplasma_gondii_GT1 | gene_product=AP2 domain transcription factor AP2XI-3 | transcript_product=AP2 domain transcription factor AP2XI-3 | location=TGGT1_chrXI:1647960-1653648(+) | protein_length=1399 | sequence_SO=chromosome | SO=protein_coding	0	26.962	8	6	8	6	1	1399	135.2	4.53	12.21	6	0.01	0.01					0	0		0.01				0.01		-6.64				-6.64	510793		1.25944e+06							510793
FALSE	High	Master Protein	TGGT1_201700-t26_1-p1	transcript=TGGT1_201700-t26_1 | gene=TGGT1_201700 | organism=Toxoplasma_gondii_GT1 | gene_product=WD domain, G-beta repeat-containing protein | transcript_product=WD domain, G-beta repeat-containing protein | location=TGGT1_chrVIIa:3740764-3744193(-) | protein_length=654 | sequence_SO=chromosome | SO=protein_coding	0	26.943	13	5	18	5	1	654	67.4	7.47	20.04	5	1.229	0.785					0	4.04	1.229			0.751	0.833	0.785	0.3			-0.41	-0.26	-0.35	46702.7	57404.2	1.0587e+06	882283			81.85	81.23	46702.7			57404.2
FALSE	High	Master Protein	TGGT1_223050-t26_1-p1	transcript=TGGT1_223050-t26_1 | gene=TGGT1_223050 | organism=Toxoplasma_gondii_GT1 | gene_product=ribosomal protein RPS20 | transcript_product=ribosomal protein RPS20 | location=TGGT1_chrII:1366681-1368519(+) | protein_length=233 | sequence_SO=chromosome | SO=protein_coding	0	26.847	17	4	94	4	1	233	25.8	9.52	70.61	4	0.791	0.798	0.2766	0.497325	0.401611	0.593708	14.54	9.44	0.791	1.051	0.667	0.798	1.192	0.718	-0.34	0.07	-0.58	-0.33	0.25	-0.48	781984	821946	8.38358e+06	9.99307e+06	52.28	57.54	58.36	42.23	1.05053e+06	781984	312181	830844	821946
FALSE	High	Master Protein	TGGT1_285180-t26_1-p1	transcript=TGGT1_285180-t26_1 | gene=TGGT1_285180 | organism=Toxoplasma_gondii_GT1 | gene_product=hypothetical protein | transcript_product=hypothetical protein | location=TGGT1_chrV:2405955-2411632(+) | protein_length=632 | sequence_SO=chromosome | SO=protein_coding	0	26.817	10	4	10	4	1	632	69.7	6.6	14.19	4	0.922	0.795	0.455261	0.289448	0.549546	0.418352	29.56	24.68	0.922	1.138	0.356	1.004	0.795	0.447	-0.12	0.19	-1.49	0.01	-0.33	-1.16	269526	121273	466594	468566	37.07	64.04	85.45	43.26	131569	269526	286447	121273	306731
FALSE	High	Master Protein	TGGT1_227030-t26_1-p1	transcript=TGGT1_227030-t26_1 | gene=TGGT1_227030 | organism=Toxoplasma_gondii_GT1 | gene_product=hypothetical protein | transcript_product=hypothetical protein | location=TGGT1_chrX:1036138-1037712(+) | protein_length=170 | sequence_SO=chromosome | SO=protein_coding	0	26.75	35	5	16	5	1	170	18.7	8.07	25.86	5	100	5.049					0	1464.44	100	0.01	100		100	0.255	6.64	-6.64	6.64		6.64	-1.97	45883.8	14866	9.74821e+06	202274		121.56		139.56		45883.8		4085.16
FALSE	High	Master Protein	TGGT1_260500-t26_1-p1	transcript=TGGT1_260500-t26_1 | gene=TGGT1_260500 | organism=Toxoplasma_gondii_GT1 | gene_product=putative COPI associated protein | transcript_product=putative COPI associated protein | location=TGGT1_chrVIIb:2175003-2177830(+) | protein_length=270 | sequence_SO=chromosome | SO=protein_coding	0	26.745	32	4	18	4	1	270	29.9	8.63	39.46	4	8.457	0.647					143.49	31.84	0.272	8.457	100	2.377	0.315	0.647	-1.88	3.08	6.64	1.25	-1.67	-0.63	53297.2	123402	1.07288e+06	1.338e+06	137.58	69.17	82.07	66.43	453922	6257.88		123402	52925.6
FALSE	High	Master Protein	TGGT1_217510-t26_1-p1	transcript=TGGT1_217510-t26_1 | gene=TGGT1_217510 | organism=Toxoplasma_gondii_GT1 | gene_product=hypothetical protein | transcript_product=hypothetical protein | location=TGGT1_chrXII:1824650-1826480(+) | protein_length=380 | sequence_SO=chromosome | SO=protein_coding	0	26.707	30	6	13	6	1	380	42.1	8.79	13.78	6	100	0.705					0	27.38	100			0.443	0.705	1.177	6.64			-1.17	-0.5	0.23		11510.8	651019	458964			107.97	134.69				11510.8
FALSE	High	Master Protein	TGGT1_260630-t26_1-p1	transcript=TGGT1_260630-t26_1 | gene=TGGT1_260630 | organism=Toxoplasma_gondii_GT1 | gene_product=DnaJ family Sec63 protein | transcript_product=DnaJ family Sec63 protein | location=TGGT1_chrVIIb:2081390-2087953(-) | protein_length=675 | sequence_SO=chromosome | SO=protein_coding	0	26.574	11	5	16	5	1	675	76.7	5.9	14.61	5	0.01	0.798					0	3.65	0.01			0.798	0.829	0.312	-6.64			-0.33	-0.27	-1.68	62238.2		942273	780756			82.75	22.43	62238.2
FALSE	High	Master Protein	TGGT1_271970-t26_1-p1	transcript=TGGT1_271970-t26_1 | gene=TGGT1_271970 | organism=Toxoplasma_gondii_GT1 | gene_product=glideosome-associated protein with multiple-membrane spans GAPM3 | transcript_product=glideosome-associated protein with multiple-membrane spans GAPM3 | location=TGGT1_chrVIII:4254025-4255814(+) | protein_length=310 | sequence_SO=chromosome | SO=protein_coding	0	26.529	15	3	16	3	1	310	34.3	4.96	21.69	3	0.846	0.847	0.295613	0.181253	0.418989	0.304599	13.15	12.23	0.846	1.046	0.742	0.847	0.944	0.662	-0.24	0.06	-0.43	-0.24	-0.08	-0.6	390555	289666	2.6623e+06	2.51399e+06	25.36	40.41	79.82	61.65	286660	482674	390555	242649	504653
FALSE	High	Master Protein	TGGT1_249970-t26_1-p1	transcript=TGGT1_249970-t26_1 | gene=TGGT1_249970 | organism=Toxoplasma_gondii_GT1 | gene_product=hypothetical protein | transcript_product=hypothetical protein | location=TGGT1_chrXII:4900104-4901997(+) | protein_length=229 | sequence_SO=chromosome | SO=protein_coding	0	26.479	38	4	16	4	1	229	24.7	9.58	10.78	4	0.01	0.664					0	9.52	0.01	0.01		0.761	0.664	0.533	-6.64	-6.64		-0.39	-0.59	-0.91	7125.79		889911	590961	25.61		85.03	67.72	5933.49	8557.68
FALSE	High	Master Protein	TGGT1_321520-t26_1-p1	transcript=TGGT1_321520-t26_1 | gene=TGGT1_321520 | organism=Toxoplasma_gondii_GT1 | gene_product=hypothetical protein | transcript_product=hypothetical protein | location=TGGT1_chrIb:1764465-1766439(+) | protein_length=232 | sequence_SO=chromosome | SO=protein_coding	0	26.476	14	2	23	2	1	232	25.2	4.6	40.86	2		0.673						3.35				0.673	0.707	0.609				-0.57	-0.5	-0.72			3.51355e+06	2.4832e+06			82.3	75.12
FALSE	High	Master Protein	TGGT1_248740-t26_1-p1	transcript=TGGT1_248740-t26_1 | gene=TGGT1_248740 | organism=Toxoplasma_gondii_GT1 | gene_product=hypothetical protein | transcript_product=hypothetical protein | location=TGGT1_chrXII:4066708-4074096(-) | protein_length=1283 | sequence_SO=chromosome | SO=protein_coding	0	26.367	6	4	19	4	1	1283	140	8.44	23.66	4	2.365	0.763	0.16938	0.0448426	0.307143	0.166604	78.93	8.54	2.365	1.106	3.92	0.679	0.763	0.838	1.24	0.15	1.97	-0.56	-0.39	-0.25	95629.2	128060	648567	543556	49.38	40.43	15.35	19.82	95629.2	99360.1	32671.8	226148	109877
FALSE	High	Master Protein	TGGT1_240890-t26_1-p1	transcript=TGGT1_240890-t26_1 | gene=TGGT1_240890 | organism=Toxoplasma_gondii_GT1 | gene_product=6-phosphofructokinase | transcript_product=6-phosphofructokinase | location=TGGT1_chrVI:1494349-1507600(+) | protein_length=1399 | sequence_SO=chromosome | SO=protein_coding	0	26.268	7	7	34	7	1	1399	154.6	6.64	41.69	7	100	0.01					0	0	100	100	100		0.01	0.01	6.64	6.64	6.64		-6.64	-6.64		6.27508e+06	46697.1			35.08	129.05					5.80439e+06	6.27508e+06
FALSE	High	Master Protein	TGGT1_226000-t26_1-p1	transcript=TGGT1_226000-t26_1 | gene=TGGT1_226000 | organism=Toxoplasma_gondii_GT1 | gene_product=putative ATP synthase | transcript_product=putative ATP synthase | location=TGGT1_chrX:1780321-1782432(-) | protein_length=183 | sequence_SO=chromosome | SO=protein_coding	0	26.243	35	4	17	4	1	183	19.4	5.99	31.38	4	0.921	0.817					6.77	2.34	0.873	0.972		0.817	0.849	0.798	-0.2	-0.04		-0.29	-0.24	-0.33	35501	32708.9	1.0646e+06	873596	57.4	50.92	89.95	87.49	54611.4	23078		47682.8	22437.3
FALSE	High	Master Protein	TGGT1_288830-t26_1-p1	transcript=TGGT1_288830-t26_1 | gene=TGGT1_288830 | organism=Toxoplasma_gondii_GT1 | gene_product=NADH dehydrogenase (NDH2-II) | transcript_product=NADH dehydrogenase (NDH2-II) | location=TGGT1_chrIX:2563874-2571485(+) | protein_length=657 | sequence_SO=chromosome | SO=protein_coding	0	26.21	16	7	10	7	1	657	72.1	9.01	11.61	7	0.01	0.148					0	1.41			0.01	0.083	0.148	0.909			-6.64	-3.58	-2.76	-0.14	19461.8		276835	38581.7			41.09	143.24			19461.8
FALSE	High	Master Protein	TGGT1_245680-t26_1-p1	transcript=TGGT1_245680-t26_1 | gene=TGGT1_245680 | organism=Toxoplasma_gondii_GT1 | gene_product=ribosomal protein RPL21 | transcript_product=ribosomal protein RPL21 | location=TGGT1_chrXII:2403148-2403621(+) | protein_length=157 | sequence_SO=chromosome | SO=protein_coding	0	26.043	43	6	38	6	1	157	17.9	10.35	69.71	6	2.586	0.792	0.116409	0.0881163	0.275441	0.206617	9.72	11.35	1.198	2.756	2.586	0.792	0.889	0.678	0.26	1.46	1.37	-0.34	-0.17	-0.56	100432	259720	4.20635e+06	3.33263e+06	78.89	31.56	72.52	59.3	284686	64328.6	100432	340937	177259
FALSE	High	Master Protein	TGGT1_262040-t26_1-p1	transcript=TGGT1_262040-t26_1 | gene=TGGT1_262040 | organism=Toxoplasma_gondii_GT1 | gene_product=SAC3/GANP family protein | transcript_product=SAC3/GANP family protein | location=TGGT1_chrVIIb:1387326-1388856(+) | protein_length=269 | sequence_SO=chromosome | SO=protein_coding	0	26.04	34	6	22	6	1	269	29.7	7.84	26.96	6	0.681	1.055	0.582943	0.392533	0.662252	0.513312	23.89	4	1.591	0.681	0.445	1.055	1.084	0.972	0.67	-0.55	-1.17	0.08	0.12	-0.04	26674.1	17698.5	1.31987e+06	1.43018e+06	62.14	119.17	87.51	81.96	70500.8	25972.4	26674.1	112164	17698.5
FALSE	High	Master Protein	TGGT1_226380-t26_1-p1	transcript=TGGT1_226380-t26_1 | gene=TGGT1_226380 | organism=Toxoplasma_gondii_GT1 | gene_product=hypothetical protein | transcript_product=hypothetical protein | location=TGGT1_chrX:1583226-1584362(+) | protein_length=378 | sequence_SO=chromosome | SO=protein_coding	0	25.984	17	5	12	5	1	378	42.6	9.26	6.78	5	0.766	0.841					0	9.83	0.766			1.016	0.841	0.762	-0.39			0.02	-0.25	-0.39	43668.3	33439.2	299843	252114			75.36	63.5	43668.3			33439.2
FALSE	High	Master Protein	TGGT1_319870-t26_1-p1	transcript=TGGT1_319870-t26_1 | gene=TGGT1_319870 | organism=Toxoplasma_gondii_GT1 | gene_product=ubiquitin-conjugating enzyme subfamily protein | transcript_product=ubiquitin-conjugating enzyme subfamily protein | location=TGGT1_chrIV:656858-661140(-) | protein_length=311 | sequence_SO=chromosome | SO=protein_coding	0	25.978	18	3	17	3	1	311	35	10.02	32.75	3	0.01	0.837					0	3.35		0.01		0.864	0.837	0.645		-6.64		-0.21	-0.26	-0.63	16002.1		1.46214e+06	1.2236e+06			103.9	89.7		16002.1
FALSE	High	Master Protein	TGGT1_240280-t26_1-p1	transcript=TGGT1_240280-t26_1 | gene=TGGT1_240280 | organism=Toxoplasma_gondii_GT1 | gene_product=S1/P1nuclease | transcript_product=S1/P1nuclease | location=TGGT1_chrVI:1125848-1133275(-) | protein_length=439 | sequence_SO=chromosome | SO=protein_coding	0	25.942	17	5	16	5	1	439	48.5	7.69	13.68	5	0.243	0.274					0	2.52	0.243			0.274	0.212	0.474	-2.04			-1.87	-2.24	-1.08	94242.7	22930.1	1.04207e+06	221117			70.94	108.77	94242.7			22930.1
FALSE	High	Master Protein	TGGT1_247220-t26_1-p1	transcript=TGGT1_247220-t26_1 | gene=TGGT1_247220 | organism=Toxoplasma_gondii_GT1 | gene_product=nudix -type motif 9 isoform a family protein | transcript_product=nudix -type motif 9 isoform a family protein | location=TGGT1_chrXII:3108760-3111719(-) | protein_length=546 | sequence_SO=chromosome | SO=protein_coding	0	25.898	17	6	12	6	1	546	60.5	6.14	13.05	6	5.914	1.004					1249.16	12.64	0.35	100		0.919	4.133	1.004	-1.52	6.64		-0.12	2.05	0.01	50615.8	23071.4	443208	407159		36.62	137.38	124.55	50615.8			17700.8	30071.5
FALSE	High	Master Protein	TGGT1_308920-t26_1-p1	transcript=TGGT1_308920-t26_1 | gene=TGGT1_308920 | organism=Toxoplasma_gondii_GT1 | gene_product=splicing factor U2AF protein | transcript_product=splicing factor U2AF protein | location=TGGT1_chrXI:318912-325751(-) | protein_length=770 | sequence_SO=chromosome | SO=protein_coding	0	25.863	8	5	8	5	1	770	83.1	6.55	13.13	5	0.737	17.815					2.86	402.9	0.737	0.763	0.695		100	3.174	-0.44	-0.39	-0.53		6.64	1.67	646274	448850	234952	141771	25.4	25.94		131.55	406606	670788	646274	299724	512017
FALSE	High	Master Protein	TGGT1_223540-t26_1-p1	transcript=TGGT1_223540-t26_1 | gene=TGGT1_223540 | organism=Toxoplasma_gondii_GT1 | gene_product=importin-beta N-terminal domain-containing protein | transcript_product=importin-beta N-terminal domain-containing protein | location=TGGT1_chrX:3650759-3662029(-) | protein_length=1095 | sequence_SO=chromosome | SO=protein_coding	0	25.832	9	6	9	6	1	1095	122.1	4.77	13.53	6	0.01	0.109					0	9.41		0.01			0.01	1.179		-6.64			-6.64	0.24	112378		353406	524570			32.03			112378
FALSE	High	Master Protein	TGGT1_215060-t26_1-p1	transcript=TGGT1_215060-t26_1 | gene=TGGT1_215060 | organism=Toxoplasma_gondii_GT1 | gene_product=putative small GTP-binding protein sar1 | transcript_product=putative small GTP-binding protein sar1 | location=TGGT1_chrX:6612856-6615947(-) | protein_length=192 | sequence_SO=chromosome | SO=protein_coding	0	25.661	32	5	36	5	1	192	22.1	7.64	23.59	5	0.611	0.755	0.00433265	0.0856333	0.0794754	0.202256	2.44	11.91	0.569	0.611	0.638	0.649	0.755	0.88	-0.81	-0.71	-0.65	-0.62	-0.4	-0.19	282763	180373	2.9983e+06	2.26471e+06	20.41	15.09	18.14	33.27	386252	269700	282763	219905	164773
FALSE	High	Master Protein	TGGT1_236950-t26_1-p1	transcript=TGGT1_236950-t26_1 | gene=TGGT1_236950 | organism=Toxoplasma_gondii_GT1 | gene_product=hypothetical protein | transcript_product=hypothetical protein | location=TGGT1_chrX:5495249-5496238(-) | protein_length=112 | sequence_SO=chromosome | SO=protein_coding	0	25.607	55	3	14	3	1	112	12.5	6.49	15.12	3	22.335	0.811					124.46	0.17	22.335	3.585	100	0.727	0.813	0.811	4.48	1.84	6.64	-0.46	-0.3	-0.3	10455.4	80048.5	686125	557533	90.55	29.38	95.63	98.27	4896.28	22326.2		109356	80048.5
FALSE	High	Master Protein	TGGT1_214220-t26_1-p1	transcript=TGGT1_214220-t26_1 | gene=TGGT1_214220 | organism=Toxoplasma_gondii_GT1 | gene_product=hypothetical protein | transcript_product=hypothetical protein | location=TGGT1_chrX:6010193-6012510(+) | protein_length=212 | sequence_SO=chromosome | SO=protein_coding	0	25.554	23	4	13	4	1	212	23.4	9.83	10.21	4	1.448	0.765					37.22	3.15	1.448	1.811	0.01	0.765	0.793	0.355	0.53	0.86	-6.64	-0.39	-0.33	-1.49	25847.6	39832.1	1.2436e+06	986327	14.01	8.83	70.49	28.28	25847.6	23414.1	30749.2	37417	42403
FALSE	High	Master Protein	TGGT1_243580-t26_1-p1	transcript=TGGT1_243580-t26_1 | gene=TGGT1_243580 | organism=Toxoplasma_gondii_GT1 | gene_product=putative Hit family protein involved in cell-cycle regulation | transcript_product=putative Hit family protein involved in cell-cycle regulation | location=TGGT1_chrVI:2645473-2647229(+) | protein_length=276 | sequence_SO=chromosome | SO=protein_coding	0	25.519	25	4	14	4	1	276	30.5	9.58	14.91	4	0.01	0.526					0	9.15	0.01	0.01		0.526	0.644	0.347	-6.64	-6.64		-0.93	-0.64	-1.53	54430.3		1.54501e+06	813348	84.43		57.83	24.65	108354	27342.3
FALSE	High	Master Protein	TGGT1_216590-t26_1-p1	transcript=TGGT1_216590-t26_1 | gene=TGGT1_216590 | organism=Toxoplasma_gondii_GT1 | gene_product=HEAT repeat-containing protein | transcript_product=HEAT repeat-containing protein | location=TGGT1_chrXI:5982217-5988765(-) | protein_length=1010 | sequence_SO=chromosome | SO=protein_coding	0	25.494	11	6	10	6	1	1010	111.1	5.14	9.91	6	0.01	0.868					0	15.2	0.01	0.01		1.183	0.868	0.75	-6.64	-6.64		0.24	-0.2	-0.42	6838.22		360225	312579	19.62		105.25	89.76	5947.09	7862.87
FALSE	High	Master Protein	TGGT1_220240-t26_1-p1	transcript=TGGT1_220240-t26_1 | gene=TGGT1_220240 | organism=Toxoplasma_gondii_GT1 | gene_product=hypothetical protein | transcript_product=hypothetical protein | location=TGGT1_chrV:140178-141758(-) | protein_length=526 | sequence_SO=chromosome | SO=protein_coding	0	25.356	12	5	27	5	1	526	54.1	9.86	7.86	5	0.172	0.822					0	5.11	0.172			0.78	1.322	0.822	-2.54			-0.36	0.4	-0.28	166558	28579.6	1.01914e+06	1.23052e+06			61.87	60.2	166558			28579.6
FALSE	High	Master Protein	TGGT1_264040-t26_1-p1	transcript=TGGT1_264040-t26_1 | gene=TGGT1_264040 | organism=Toxoplasma_gondii_GT1 | gene_product=hypothetical protein | transcript_product=hypothetical protein | location=TGGT1_chrVIIb:194329-194991(-) | protein_length=220 | sequence_SO=chromosome | SO=protein_coding	0	25.182	34	6	15	6	1	220	24.5	9.69	16.48	6	0.01	0.427					0	3.12	0.01			0.377	0.427	0.676	-6.64			-1.41	-1.23	-0.57	48849.2		714172	304730			110.83	131.93	48849.2
FALSE	High	Master Protein	TGGT1_217820-t26_1-p1	transcript=TGGT1_217820-t26_1 | gene=TGGT1_217820 | organism=Toxoplasma_gondii_GT1 | gene_product=PCI domain-containing protein | transcript_product=PCI domain-containing protein | location=TGGT1_chrXII:2088870-2094251(+) | protein_length=463 | sequence_SO=chromosome | SO=protein_coding	0	25.099	17	6	15	6	1	463	51.7	5.94	26.47	6	19.436	0.706					54.6	26.03	13.554	27.871		0.458	0.706	1.711	3.76	4.8		-1.13	-0.5	0.77	4096.21	79615.4	567951	401185	28.92	72.66	77.21	128.29	3328.88	5040.41		45120.8	140481
FALSE	High	Master Protein	TGGT1_310040-t26_1-p1	transcript=TGGT1_310040-t26_1 | gene=TGGT1_310040 | organism=Toxoplasma_gondii_GT1 | gene_product=putative ubiquitin conjugating enzyme E2 | transcript_product=putative ubiquitin conjugating enzyme E2 | location=TGGT1_chrXI:980947-983303(-) | protein_length=199 | sequence_SO=chromosome | SO=protein_coding	0	25.094	25	4	18	4	1	199	22.6	8.29	15.9	4	1.386	0.782					133.62	0.9	0.617	3.114		0.782	0.789	0.57	-0.7	1.64		-0.36	-0.34	-0.81	64780	89761.1	1.40675e+06	1.1104e+06	97.32	4.89	92.51	74.05	150714	27843.7		92922.1	86707.6
FALSE	High	Master Protein	TGGT1_254520-t26_1-p1	transcript=TGGT1_254520-t26_1 | gene=TGGT1_254520 | organism=Toxoplasma_gondii_GT1 | gene_product=mediator complex subunit MED11 | transcript_product=mediator complex subunit MED11 | location=TGGT1_chrIII:1782437-1785137(+) | protein_length=153 | sequence_SO=chromosome | SO=protein_coding	0	24.922	34	4	10	4	1	153	16.4	9.31	11.02	4		0.305						0						0.305						-1.71			1.57538e+06	481178
FALSE	High	Master Protein	TGGT1_202770-t26_1-p1	transcript=TGGT1_202770-t26_1 | gene=TGGT1_202770 | organism=Toxoplasma_gondii_GT1 | gene_product=RNA recognition motif-containing protein | transcript_product=RNA recognition motif-containing protein | location=TGGT1_chrVIIa:2940119-2946876(+) | protein_length=532 | sequence_SO=chromosome | SO=protein_coding	0	24.844	19	6	20	6	1	532	55.8	6.32	26.81	6	0.01	0.545					0	9.36	0.392	0.01	0.01	0.545	0.67	0.429	-1.35	-6.64	-6.64	-0.88	-0.58	-1.22	73468.7	53264.9	1.33947e+06	809610	70.93		54.24	32.16	136012	25298.1	73468.7	53264.9
FALSE	High	Master Protein	TGGT1_268890-t26_1-p1	transcript=TGGT1_268890-t26_1 | gene=TGGT1_268890 | organism=Toxoplasma_gondii_GT1 | gene_product=citrate synthase I | transcript_product=citrate synthase I | location=TGGT1_chrVIII:6220882-6228739(+) | protein_length=560 | sequence_SO=chromosome | SO=protein_coding	0	24.841	16	8	18	8	1	560	60.4	8.81	11.26	8	0.01	0.368					0	6.24	0.01	0.01	0.01	0.482	0.236	0.368	-6.64	-6.64	-6.64	-1.05	-2.08	-1.44	97347.4		1.25786e+06	371494	42.88		84.16	89.82	185709	97347.4	89866.9
FALSE	High	Master Protein	TGGT1_218240-t26_1-p1	transcript=TGGT1_218240-t26_1 | gene=TGGT1_218240 | organism=Toxoplasma_gondii_GT1 | gene_product=hypothetical protein | transcript_product=hypothetical protein | location=TGGT1_chrXII:1592419-1596488(-) | protein_length=1249 | sequence_SO=chromosome | SO=protein_coding	0	24.701	7	6	16	6	1	1249	132.5	5.21	17.93	6	1.952	0.765	0.924998	0.441164	0.943498	0.55383	145.21	60.75	1.952	23.016	0.04	1.308	0.765	0.23	0.96	4.52	-4.64	0.39	-0.39	-2.12	205375	400886	732941	560804	74.84	91.71	101.66	20.62	205375	28966.4	276493	400886	666695
FALSE	High	Master Protein	TGGT1_204480-t26_1-p1	transcript=TGGT1_204480-t26_1 | gene=TGGT1_204480 | organism=Toxoplasma_gondii_GT1 | gene_product=thioredoxin domain-containing protein | transcript_product=thioredoxin domain-containing protein | location=TGGT1_chrVIIa:1656821-1664723(-) | protein_length=659 | sequence_SO=chromosome | SO=protein_coding	0	24.512	9	5	12	5	1	659	72.1	8.56	15.35	5	0.21	0.533					6.22	3.35	0.01	100	0.21	0.533	1.273	0.491	-6.64	6.64	-2.25	-0.91	0.35	-1.03	76453.2	33098.4	379222	416148	51.8	46.28	124.47	98.53	52069.1		112256		46490.6
FALSE	High	Master Protein	TGGT1_210370-t26_1-p1	transcript=TGGT1_210370-t26_1 | gene=TGGT1_210370 | organism=Toxoplasma_gondii_GT1 | gene_product=hypothetical protein | transcript_product=hypothetical protein | location=TGGT1_chrIX:4634440-4635879(-) | protein_length=479 | sequence_SO=chromosome | SO=protein_coding	0	24.467	22	7	10	7	1	479	52.4	9.14	13.13	7	1.295	2.606					147.12	77.58	0.01	1.295	100	2.606	100	1.242	-6.64	0.37	6.64	1.38	6.64	0.31	22301.6	23652.7	169993	55065	14.13	14.01	137.12	157.44	24654	20173.6			26124.1
FALSE	High	Master Protein	TGGT1_239530-t26_1-p1	transcript=TGGT1_239530-t26_1 | gene=TGGT1_239530 | organism=Toxoplasma_gondii_GT1 | gene_product=alanine-glyoxylate aminotransferase | transcript_product=alanine-glyoxylate aminotransferase | location=TGGT1_chrVI:730926-732071(+) | protein_length=381 | sequence_SO=chromosome | SO=protein_coding	0	24.466	26	6	13	6	1	381	41.8	7.21	11.67	6	5.193	0.816					147.97	6.26	5.193	29.733	0.01	0.816	0.867	0.593	2.38	4.89	-6.64	-0.29	-0.21	-0.75	22992.2	200839	607646	527061	156.35	67.56	83.3	62.08	22992.2	11361.8	494172	119400	337824
FALSE	High	Master Protein	TGGT1_223680-t26_1-p1	transcript=TGGT1_223680-t26_1 | gene=TGGT1_223680 | organism=Toxoplasma_gondii_GT1 | gene_product=ubiquitin family protein | transcript_product=ubiquitin family protein | location=TGGT1_chrX:3562244-3565671(-) | protein_length=399 | sequence_SO=chromosome | SO=protein_coding	0	24.416	23	4	7	4	1	399	41.7	5.2	9.83	4		0.01						0						0.01						-6.64			2.54428e+06
FALSE	High	Master Protein	TGGT1_254440-t26_1-p1	transcript=TGGT1_254440-t26_1 | gene=TGGT1_254440 | organism=Toxoplasma_gondii_GT1 | gene_product=ribosomal protein RPL12 | transcript_product=ribosomal protein RPL12 | location=TGGT1_chrIII:1720222-1723221(-) | protein_length=165 | sequence_SO=chromosome | SO=protein_coding	0	24.405	25	3	47	3	1	165	17.8	9.42	73.56	3	0.745	0.721	0.407105	0.0936547	0.515644	0.210305	7.44	0.08	0.678	1.17	0.745	0.721	0.721	0.92	-0.56	0.23	-0.42	-0.47	-0.47	-0.12	274716	208151	3.31922e+06	2.39225e+06	46.16	33.44	69.04	83.77	274716	177891	452480	186168	208151
FALSE	High	Master Protein	TGGT1_295340-t26_1-p1	transcript=TGGT1_295340-t26_1 | gene=TGGT1_295340 | organism=Toxoplasma_gondii_GT1 | gene_product=UV excision repair protein Rad23 protein | transcript_product=UV excision repair protein Rad23 protein | location=TGGT1_chrIa:1797323-1802019(+) | protein_length=380 | sequence_SO=chromosome | SO=protein_coding	0	24.357	24	4	15	4	1	380	39.7	4.53	14.97	4	1	1.277					7412.26	86.01	0.01	100		1.277	2.244	0.536	-6.64	6.64		0.35	1.17	-0.9	52241.8	19122.8	326469	634423			93.28	27.28	52241.8				19122.8
FALSE	High	Master Protein	TGGT1_277000-t26_1-p1	transcript=TGGT1_277000-t26_1 | gene=TGGT1_277000 | organism=Toxoplasma_gondii_GT1 | gene_product=putative transport protein Sec24 | transcript_product=putative transport protein Sec24 | location=TGGT1_chrXII:6701488-6710271(-) | protein_length=1019 | sequence_SO=chromosome | SO=protein_coding	0	24.292	8	4	12	4	1	1019	108	7.12	22.38	4	0.01	0.636					0	0.35	0.01			0.563	0.636	0.639	-6.64			-0.83	-0.65	-0.65	25251.1		334993	212912			105.97	108.95	25251.1
FALSE	High	Master Protein	TGGT1_252360-t26_1-p1	transcript=TGGT1_252360-t26_1 | gene=TGGT1_252360 | organism=Toxoplasma_gondii_GT1 | gene_product=rhoptry kinase family protein ROP24 (incomplete catalytic triad) | transcript_product=rhoptry kinase family protein ROP24 (incomplete catalytic triad) | location=TGGT1_chrIII:494762-496369(+) | protein_length=535 | sequence_SO=chromosome | SO=protein_coding	0	24.274	17	6	16	6	1	535	60.8	9.45	12.51	6	0.979	0.972					0	25.06	0.979			0.972	1.38	0.799	-0.03			-0.04	0.46	-0.32	39558.8	38737.5	358288	348429			73.36	50.21	39558.8			38737.5
FALSE	High	Master Protein	TGGT1_223410-t26_1-p1	transcript=TGGT1_223410-t26_1 | gene=TGGT1_223410 | organism=Toxoplasma_gondii_GT1 | gene_product=putative eukaryotic initiation factor-4E | transcript_product=putative eukaryotic initiation factor-4E | location=TGGT1_chrX:3763701-3766447(+) | protein_length=225 | sequence_SO=chromosome | SO=protein_coding	0	24.227	23	4	24	4	1	225	26	6.24	27.42	4	6.005	1.45					26.56	28.62	4.929	6.005	100	1.729	1.45	0.586	2.3	2.59	6.64	0.79	0.54	-0.77	19109.1	77684.8	921167	1.33527e+06	83.36	63.88	94.32	32.89	37598.9	9711.94		185328	58319.9
FALSE	High	Master Protein	TGGT1_229250A-t26_1-p1	transcript=TGGT1_229250A-t26_1 | gene=TGGT1_229250A | organism=Toxoplasma_gondii_GT1 | gene_product=ribosomal protein RPL28 | transcript_product=ribosomal protein RPL28 | location=TGGT1_chrVIII:108601-108824(-) | protein_length=74 | sequence_SO=chromosome | SO=protein_coding	0	23.883	45	4	30	4	1	74	8.3	10.29	21.18	4	10.126	0.914	0.0717138	0.488138	0.234756	0.589231	34.41	8.53	10.126	2.282	12.477	0.851	0.914	1.077	3.34	1.19	3.64	-0.23	-0.13	0.11	105070	611764	2.84746e+06	2.60258e+06	44.96	57.76	32.69	45.59	105070	133939	49033.2	1.06398e+06	305707
FALSE	High	Master Protein	TGGT1_200250-t26_1-p1	transcript=TGGT1_200250-t26_1 | gene=TGGT1_200250 | organism=Toxoplasma_gondii_GT1 | gene_product=microneme protein MIC17A | transcript_product=microneme protein MIC17A | location=AAQM03000392:1804-2859(+) | protein_length=351 | sequence_SO=contig | SO=protein_coding	0	23.849	16	5	30	5	1	351	38.8	8.27	19.6	5	0.59	0.318	0.00255743	0.228643	0.0712992	0.360474	0.87	1.23	0.59	0.548	0.6	0.318	0.292	1.132	-0.76	-0.87	-0.74	-1.65	-1.78	0.18	1.3597e+06	815293	1.44421e+06	548776	22.08	25.85	27.32	82.39	1.43011e+06	925339	1.3597e+06	843199	506938
FALSE	High	Master Protein	TGGT1_248600-t26_1-p1	transcript=TGGT1_248600-t26_1 | gene=TGGT1_248600 | organism=Toxoplasma_gondii_GT1 | gene_product=aspartate aminotransferase | transcript_product=aspartate aminotransferase | location=TGGT1_chrXII:3950218-3958059(-) | protein_length=597 | sequence_SO=chromosome | SO=protein_coding	0	23.828	14	5	10	5	1	597	66.1	9.06	13.07	5		1.859						0						1.859						0.89			855836	1.59141e+06
FALSE	High	Master Protein	TGGT1_228630-t26_1-p1	transcript=TGGT1_228630-t26_1 | gene=TGGT1_228630 | organism=Toxoplasma_gondii_GT1 | gene_product=hypothetical protein | transcript_product=hypothetical protein | location=TGGT1_chrX:179956-182506(+) | protein_length=328 | sequence_SO=chromosome | SO=protein_coding	0	23.781	23	4	17	4	1	328	34.7	8.24	21.18	4	0.01	0.812					0	1.9	0.01			0.812	0.796	1.291	-6.64			-0.3	-0.33	0.37	37216.7		555067	441825			66.3	94.19	37216.7
FALSE	High	Master Protein	TGGT1_207170-t26_1-p1	transcript=TGGT1_207170-t26_1 | gene=TGGT1_207170 | organism=Toxoplasma_gondii_GT1 | gene_product=hypothetical protein | transcript_product=hypothetical protein | location=TGGT1_chrX:7297038-7299283(+) | protein_length=141 | sequence_SO=chromosome | SO=protein_coding	0	23.765	31	3	54	3	1	141	15.2	10.4	66.98	3	0.527	0.901					0.67	3.84	0.527	0.536	0.01	0.901	0.93	0.784	-0.92	-0.9	-6.64	-0.15	-0.11	-0.35	193010	106652	2.93634e+06	2.72964e+06	19.26	25.27	40.57	35.57	242228	166097	193010	127763	89029
FALSE	High	Master Protein	TGGT1_295040-t26_1-p1	transcript=TGGT1_295040-t26_1 | gene=TGGT1_295040 | organism=Toxoplasma_gondii_GT1 | gene_product=HEAT repeat-containing protein | transcript_product=HEAT repeat-containing protein | location=TGGT1_chrIa:1332125-1343550(-) | protein_length=971 | sequence_SO=chromosome | SO=protein_coding	0	23.763	10	7	9	7	1	971	104.5	4.75	9.41	7	0.01	0.632					0	13.89	1.221	0.01	0.01	0.632	0.972	0.483	0.29	-6.64	-6.64	-0.66	-0.04	-1.05	92749.2	10672.4	407919	257602	78.29		130.49	112.61	8741.4	118577	92749.2	10672.4
FALSE	High	Master Protein	TGGT1_209260-t26_1-p1	transcript=TGGT1_209260-t26_1 | gene=TGGT1_209260 | organism=Toxoplasma_gondii_GT1 | gene_product=putative cytochrome c oxidase subunit | transcript_product=putative cytochrome c oxidase subunit | location=TGGT1_chrIb:1169758-1172481(-) | protein_length=310 | sequence_SO=chromosome | SO=protein_coding	0	23.733	31	5	7	5	1	310	34.7	6.54	15.18	5	0.01	1.538					0	147.3		0.01		0.01	100	1.538		-6.64		-6.64	6.64	0.62	33512.5		492980	370307			120.55	136.14		33512.5
FALSE	High	Master Protein	TGGT1_214440-t26_1-p1	transcript=TGGT1_214440-t26_1 | gene=TGGT1_214440 | organism=Toxoplasma_gondii_GT1 | gene_product=4'-phosphopantetheinyl transferase superfamily protein | transcript_product=4'-phosphopantetheinyl transferase superfamily protein | location=TGGT1_chrX:6181577-6185359(+) | protein_length=437 | sequence_SO=chromosome | SO=protein_coding	0	23.725	30	8	9	8	1	437	48.5	6.95	8.29	8		100						0				100	100	2.082				6.64	6.64	1.06			1.14803e+06	195504				139.41
FALSE	High	Master Protein	TGGT1_200360-t26_1-p1	transcript=TGGT1_200360-t26_1 | gene=TGGT1_200360 | organism=Toxoplasma_gondii_GT1 | gene_product=hypothetical protein | transcript_product=hypothetical protein | location=TGGT1_chrVIII:6800991-6801551(+) | protein_length=186 | sequence_SO=chromosome | SO=protein_coding	0	23.653	44	5	16	5	1	186	20.2	9.61	24.3	5	0.549	0.936					0	12.96	0.549			1.029	0.723	0.936	-0.86			0.04	-0.47	-0.1	120685	66295.3	1.50974e+06	1.55395e+06			79.57	82.79	120685			66295.3
FALSE	High	Master Protein	TGGT1_231140-t26_1-p1	transcript=TGGT1_231140-t26_1 | gene=TGGT1_231140 | organism=Toxoplasma_gondii_GT1 | gene_product=ribosomal protein RPS25 | transcript_product=ribosomal protein RPS25 | location=TGGT1_chrVIII:1259763-1260788(+) | protein_length=161 | sequence_SO=chromosome | SO=protein_coding	0	23.564	23	4	35	4	1	161	18.7	10.33	56.99	4	0.837	0.679	0.633185	0.109875	0.695165	0.232275	22.81	10.77	0.837	1.304	0.653	0.786	0.438	0.679	-0.26	0.38	-0.61	-0.35	-1.19	-0.56	146810	96988.4	3.31834e+06	1.77561e+06	78.14	73.43	51.94	60.75	369615	74354.5	146810	309308	96988.4
FALSE	High	Master Protein	TGGT1_214930-t26_1-p1	transcript=TGGT1_214930-t26_1 | gene=TGGT1_214930 | organism=Toxoplasma_gondii_GT1 | gene_product=hypothetical protein | transcript_product=hypothetical protein | location=TGGT1_chrX:6492717-6493133(-) | protein_length=138 | sequence_SO=chromosome | SO=protein_coding	0	23.497	43	4	7	4	1	138	15.1	7.28	14.74	4	0.01	0.727					0	13			0.01	0.848	0.727	0.01			-6.64	-0.24	-0.46	-6.64	363199		218234	135810			121.02	21.78			363199
FALSE	High	Master Protein	TGGT1_275440-t26_1-p1	transcript=TGGT1_275440-t26_1 | gene=TGGT1_275440 | organism=Toxoplasma_gondii_GT1 | gene_product=dense granule protein GRA6 | transcript_product=dense granule protein GRA6 | location=TGGT1_chrX:7158307-7158999(-) | protein_length=223 | sequence_SO=chromosome | SO=protein_coding	0	23.464	20	4	65	4	1	223	23.3	5.66	76.36	4	0.464	0.49	0.056138	0.416771	0.230857	0.534725	2.46	5.33	0.429	0.464	0.718	0.417	0.49	1.468	-1.22	-1.11	-0.48	-1.26	-1.03	0.55	291560	139596	4.92715e+06	2.10464e+06	76.08	57.8	7.92	78.75	802601	291560	194343	343958	135352
FALSE	High	Master Protein	TGGT1_254720-t26_1-p1	transcript=TGGT1_254720-t26_1 | gene=TGGT1_254720 | organism=Toxoplasma_gondii_GT1 | gene_product=dense granule protein GRA8 | transcript_product=dense granule protein GRA8 | location=TGGT1_chrIII:1884681-1885484(+) | protein_length=267 | sequence_SO=chromosome | SO=protein_coding	0	23.351	16	4	43	4	1	267	28.5	10.76	42.17	4	0.863	1.279	0.196256	0.29018	0.330878	0.418352	2.09	23.68	0.88	0.554	0.863	1.279	1.075	3.473	-0.19	-0.85	-0.21	0.35	0.1	1.8	262556	158927	2225186	5.03002e+06	58.52	58.1	49.83	50.4	262556	286981	67405.5	230927	158927
FALSE	High	Master Protein	TGGT1_254870-t26_1-p1	transcript=TGGT1_254870-t26_1 | gene=TGGT1_254870 | organism=Toxoplasma_gondii_GT1 | gene_product=hypothetical protein | transcript_product=hypothetical protein | location=TGGT1_chrIII:1976274-1981704(-) | protein_length=428 | sequence_SO=chromosome | SO=protein_coding	0	23.342	13	4	87	4	1	428	47	5.71	93.24	4	9.293	0.972					10.11	0	13.391	9.293	8.659			0.972	3.74	3.22	3.11			-0.04	309313	2.8744e+06	504562	490212	77.02	61.72			202435	309313	857761	2.71084e+06	2.8744e+06
FALSE	High	Master Protein	TGGT1_232030-t26_1-p1	transcript=TGGT1_232030-t26_1 | gene=TGGT1_232030 | organism=Toxoplasma_gondii_GT1 | gene_product=hypothetical protein | transcript_product=hypothetical protein | location=TGGT1_chrVIII:1768528-1771709(+) | protein_length=208 | sequence_SO=chromosome | SO=protein_coding	0	23.238	24	4	24	4	1	208	23.4	5.45	10	4	100	0.92					0	65.74	100	100	100	0.92	2.407	0.439	6.64	6.64	6.64	-0.12	1.27	-1.19		580056	327766	788789		48.55	129.27	68.31				580056	1.17117e+06
FALSE	High	Master Protein	TGGT1_293430-t26_1-p1	transcript=TGGT1_293430-t26_1 | gene=TGGT1_293430 | organism=Toxoplasma_gondii_GT1 | gene_product=hypothetical protein | transcript_product=hypothetical protein | location=TGGT1_chrIa:302881-304116(-) | protein_length=411 | sequence_SO=chromosome | SO=protein_coding	0	23.193	17	5	15	5	1	411	44.6	5.14	16.88	5	0.01	0.624					0	7.81	0.01	0.01		0.708	0.624	0.248	-6.64	-6.64		-0.5	-0.68	-2.01	41042.6		1.09674e+06	672559	11.31		60.75	1.53	44466	37882.8
FALSE	High	Master Protein	TGGT1_315110-t26_1-p1	transcript=TGGT1_315110-t26_1 | gene=TGGT1_315110 | organism=Toxoplasma_gondii_GT1 | gene_product=prefoldin, alpha subunit protein | transcript_product=prefoldin, alpha subunit protein | location=TGGT1_chrXI:4425976-4428186(-) | protein_length=178 | sequence_SO=chromosome | SO=protein_coding	0	23.075	47	5	10	5	1	178	19.4	8.63	16.61	5	100	0.801					0	17.28	100			0.946	0.801	0.566	6.64			-0.08	-0.32	-0.82		36478.6	273955	248061			127.66	109.15				36478.6
FALSE	High	Master Protein	TGGT1_223040-t26_1-p1	transcript=TGGT1_223040-t26_1 | gene=TGGT1_223040 | organism=Toxoplasma_gondii_GT1 | gene_product=hypothetical protein | transcript_product=hypothetical protein | location=TGGT1_chrII:1361784-1363339(-) | protein_length=239 | sequence_SO=chromosome | SO=protein_coding	0	22.991	34	7	9	7	1	239	27.4	7.25	5.58	7	0.01	0.039					0	0.41	0.01				0.01	0.151	-6.64				-6.64	-2.73	10568.9		151733	289249			139.66		10568.9
FALSE	High	Master Protein	TGGT1_247770-t26_1-p1	transcript=TGGT1_247770-t26_1 | gene=TGGT1_247770 | organism=Toxoplasma_gondii_GT1 | gene_product=hypothetical protein | transcript_product=hypothetical protein | location=TGGT1_chrXII:3511661-3512164(+) | protein_length=167 | sequence_SO=chromosome | SO=protein_coding	0	22.938	41	5	16	5	1	167	19.2	10.05	11.65	5	0.059	0.622					1.51	14.35	0.354	0.01		0.778	0.622	0.182	-1.5	-6.64		-0.36	-0.69	-2.45	57783.5	10961.6	827207	400318	78.22		77.87	17.77	30996.7	107719		10961.6
FALSE	High	Master Protein	TGGT1_209800-t26_1-p1	transcript=TGGT1_209800-t26_1 | gene=TGGT1_209800 | organism=Toxoplasma_gondii_GT1 | gene_product=formate/nitrite transporter protein | transcript_product=formate/nitrite transporter protein | location=TGGT1_chrIb:1476667-1477905(+) | protein_length=412 | sequence_SO=chromosome | SO=protein_coding	0	22.864	16	5	13	5	1	412	44.3	5.52	12.33	5	0.01	0.187					0	4.89	0.01	0.01		0.01	0.751	0.187	-6.64	-6.64		-6.64	-0.41	-2.42	73604.8		1.0297e+06	562770	95.87		52.21	37.11	167991	32249.8
FALSE	High	Master Protein	TGGT1_247440-t26_1-p1	transcript=TGGT1_247440-t26_1 | gene=TGGT1_247440 | organism=Toxoplasma_gondii_GT1 | gene_product=hypothetical protein | transcript_product=hypothetical protein | location=TGGT1_chrXII:3270269-3271405(-) | protein_length=378 | sequence_SO=chromosome | SO=protein_coding	0	22.851	29	5	7	5	1	378	40.1	9.66	5.9	5	1	0.01					7412.26	0		0.01	100			0.01		-6.64	6.64			-6.64	3244.01	2.01509e+06	408469							3244.01
[truncated: 923 more rows]
[truncated: 38 more columns]
