# Supplementary material for: Analysis of CDPK1 targets identifies a trafficking adaptor complex that regulates microneme exocytosis in Toxoplasma
Source: eLife. 2023 Nov 7;12:RP85654. doi: 10.7554/eLife.85654 (PMC10629828; doi:10.7554/eLife.85654)
Supplement: Supplementary file 8. [file elife-85654-supp8.xlsx]

## Sheet: 8_IPs_HOOK_FTS_RAW
Checked	Protein FDR Confidence: Combined	Master	Accession	Description	Exp. q-value: Combined	Sum PEP Score	Coverage [%]	# Peptides	# PSMs	# Unique Peptides	# AAs	MW [kDa]	calc. pI	Score Sequest HT: Sequest HT	# Peptides (by Search Engine): Sequest HT	Abundance Ratio: (tgAWC018) / (untagged)	Abundance Ratio: (tgNH008) / (untagged)	Abundance Ratio (log2): (tgAWC018) / (untagged)	Abundance Ratio (log2): (tgNH008) / (untagged)	Abundance Ratio P-Value: (tgAWC018) / (untagged)	Abundance Ratio P-Value: (tgNH008) / (untagged)	Abundance Ratio Adj. P-Value: (tgAWC018) / (untagged)	Abundance Ratio Adj. P-Value: (tgNH008) / (untagged)	Abundance Ratio Variability [%]: (tgAWC018) / (untagged)	Abundance Ratio Variability [%]: (tgNH008) / (untagged)	Abundance Ratios (log2) (by Bio. Rep.): (tgAWC018,R1) / (untagged,R1)	Abundance Ratios (log2) (by Bio. Rep.): (tgAWC018,R2) / (untagged,R2)	Abundance Ratios (log2) (by Bio. Rep.): (tgAWC018,R3) / (untagged,R3)	Abundance Ratios (log2) (by Bio. Rep.): (tgNH008,R1) / (untagged,R1)	Abundance Ratios (log2) (by Bio. Rep.): (tgNH008,R2) / (untagged,R2)	Abundance Ratios (log2) (by Bio. Rep.): (tgNH008,R3) / (untagged,R3)	Abundances (Grouped): tgAWC018	Abundances (Grouped): tgNH008	Abundances (Grouped): untagged	Abundances (Grouped) CV [%]: tgAWC018	Abundances (Grouped) CV [%]: tgNH008	Abundances (Grouped) CV [%]: untagged	Abundances (Normalized): F10: Sample, R1, tgAWC018	Abundances (Normalized): F11: Sample, R2, tgAWC018	Abundances (Normalized): F12: Sample, R3, tgAWC018	Abundances (Normalized): F1: Sample, R1, tgNH008	Abundances (Normalized): F2: Sample, R2, tgNH008	Abundances (Normalized): F3: Sample, R3, tgNH008	Abundances (Normalized): F4: Sample, R1, untagged	Abundances (Normalized): F5: Sample, R2, untagged	Abundances (Normalized): F6: Sample, R3, untagged	Abundances (Normalized): F7: Sample, R1, untagged	Abundances (Normalized): F8: Sample, R2, untagged	Abundances (Normalized): F9: Sample, R3, untagged
FALSE	High	Master Protein	TGGT1_308090-t26_1-p1	transcript=TGGT1_308090-t26_1 | gene=TGGT1_308090 | organism=Toxoplasma_gondii_GT1 | gene_product=Protein kinase domain-containing protein [Source:UniProtKB/TrEMBL;Acc:A0A125YX85] | transcript_product=rhoptry protein ROP5 | location=AAQM03000031:206-1855(-) | protein_length=549 | sequence_SO=contig | SO=protein_coding_gene | is_pseudo=false	0	635.586	67	36	4561	16	549	60.7	9.25	8816.8	36	1.296	1.233	0.37	0.3	0.710949	0.365119	0.972878	0.888356	3.84	17.2	-0.23	0.37	0.41	0.06	0.3	0.46	1.97016e+09	1.95746e+09	1.63521e+09	14.54	8.89	6.72	1.97016e+09	2.36948e+09	1.78873e+09	1.78822e+09	1.95746e+09	2.13691e+09	1.63521e+09	1.80864e+09	1.74468e+09	1.50523e+09	1.50592e+09	1.4509e+09
FALSE	High	Master Protein	TGGT1_411430-t26_1-p1	transcript=TGGT1_411430-t26_1 | gene=TGGT1_411430 | organism=Toxoplasma_gondii_GT1 | gene_product=Protein kinase domain-containing protein [Source:UniProtKB/TrEMBL;Acc:S7UG16] | transcript_product=rhoptry protein ROP5 | location=AAQM03000489:189-1624(+) | protein_length=461 | sequence_SO=contig | SO=protein_coding_gene | is_pseudo=false	0	394.071	59	27	3194	7	461	51.5	10.56	5969.15	27	1.137	0.899	0.19	-0.15	0.987416	0.948788	0.998872	0.987776	16.99	1.45	-0.51	0.34	0.19	-0.15	-0.17	-0.14	1.97321e+08	1.25432e+08	1.60261e+08	30.26	10.75	15.44	1.19801e+08	1.97321e+08	2.25501e+08	1.44727e+08	1.17755e+08	1.25432e+08	1.82181e+08	1.54887e+08	1.60261e+08	2.03783e+08	1.78087e+08	1.80771e+08
FALSE	High	Master Protein	TGGT1_286420A-t26_1-p1	transcript=TGGT1_286420A-t26_1 | gene=TGGT1_286420A | organism=Toxoplasma_gondii_GT1 | gene_product=Elongation factor 1-alpha [Source:UniProtKB/TrEMBL;Acc:S7W358] | transcript_product=putative elongation factor 1-alpha (EF-1-ALPHA) | location=TGGT1_chrV:1692242-1694172(-) | protein_length=448 | sequence_SO=chromosome | SO=protein_coding_gene | is_pseudo=false	0	361.706	74	27	1790	8	448	49.5	8.78	3859.77	27	0.598	1.765	-0.74	0.82	0.0555035	0.0626262	0.369718	0.382839	2.15	16.12	0.14	-0.74	-0.76	0.65	1.44	0.82	4.24017e+07	1.27013e+08	5.494e+07	42.01	21.47	39.05	7.35764e+07	3.3713e+07	4.24017e+07	9.24199e+07	1.27013e+08	1.4324e+08	8.07335e+07	1.14396e+08	1.24279e+08	5.0619e+07	4.95579e+07	6.44657e+07
FALSE	High	Master Protein	TGGT1_216670-t26_1-p1	transcript=TGGT1_216670-t26_1 | gene=TGGT1_216670 | organism=Toxoplasma_gondii_GT1 | gene_product=FUSE-binding protein 2 / KH-type splicing regulatory protein [Source:UniProtKB/TrEMBL;Acc:S7VUJ0] | transcript_product=FUSE-binding protein 2 / KH-type splicing regulatory protein | location=TGGT1_chrXI:5891708-5895741(-) | protein_length=941 | sequence_SO=chromosome | SO=protein_coding_gene | is_pse…	0	316.992	56	42	618	42	941	100	8.95	1233.98	42	0.935	0.531	-0.1	-0.91	0.551792	0.180046	0.956542	0.685227	30.44	32.32	0.49	-0.1	-0.37	-0.91	-0.5	-1.2	9.38268e+07	4.95798e+07	1.21258e+08	26.28	19.52	18.8	1.39528e+08	8.81529e+07	9.38268e+07	4.95798e+07	6.58766e+07	4.62111e+07	5.08624e+07	6.26264e+07	5.64985e+07	1.15592e+08	1.28081e+08	1.7099e+08
FALSE	High	Master Protein	TGGT1_289100-t26_1-p1	transcript=TGGT1_289100-t26_1 | gene=TGGT1_289100 | organism=Toxoplasma_gondii_GT1 | gene_product=hypothetical protein | transcript_product=hypothetical protein | location=TGGT1_chrIX:2793313-2802752(+) | protein_length=698 | sequence_SO=chromosome | SO=protein_coding_gene | is_pseudo=false	0	304.728	57	37	285	37	698	78.7	5.21	533.92	37	40.987	64.819	5.36	6.02	1e-17	1e-17	4.24211e-16	2.015e-16	55.83	80.47	0.22	5.82	5.36	0.46	6.64	6.02	7.80814e+07	1.2498e+08	81564.1	17.36	29.84	28.79	7.80814e+07	9.79521e+07	7.03107e+07	1.2498e+08	1.18741e+08	1.97709e+08		54042.3	115608	81564.1
FALSE	High	Master Protein	TGGT1_205250-t26_1-p1	transcript=TGGT1_205250-t26_1 | gene=TGGT1_205250 | organism=Toxoplasma_gondii_GT1 | gene_product=Protein kinase domain-containing protein [Source:UniProtKB/TrEMBL;Acc:A0A125YQA8] | transcript_product=rhoptry protein ROP18 | location=TGGT1_chrVIIa:1426782-1428446(-) | protein_length=554 | sequence_SO=chromosome | SO=protein_coding_gene | is_pseudo=false	0	289.4	57	28	1140	28	554	62.3	9.25	1989.88	28	0.852	1.174	-0.23	0.23	0.38447	0.438252	0.949873	0.924827	9.74	15.73	-0.32	-0.23	0.21	0.38	0.23	0.03	5.69186e+08	6.23667e+08	5.5644e+08	18.7	17.23	2.49	4.32149e+08	5.69186e+08	6.30988e+08	6.98932e+08	6.23667e+08	4.92837e+08	5.9342e+08	5.5644e+08	5.3995e+08	5.67321e+08	5.95202e+08	5.59075e+08
FALSE	High	Master Protein	TGGT1_294800B-t26_1-p1	transcript=TGGT1_294800B-t26_1 | gene=TGGT1_294800B | organism=Toxoplasma_gondii_GT1 | gene_product=Putative elongation factor 1-alpha (EF-1-ALPHA) [Source:UniProtKB/TrEMBL;Acc:S7UIU6] | transcript_product=putative elongation factor 1-alpha (EF-1-ALPHA) | location=TGGT1_chrIa:1133102-1134034(-) | protein_length=310 | sequence_SO=chromosome | SO=protein_coding_gene | is_pseudo=false	0	267.013	74	20	997	1	310	33.7	9.04	2077.54	20	0.841	2.049	-0.25	1.04	0.363521	0.0238257	0.938934	0.181123	12.62	72.57	-0.25	-0.47	-0.12	1.04	2.32	0.07	898745	3.18788e+06	977984	51.42	52.14	48.34	1.41412e+06	463455	898745	3.44658e+06	3.18788e+06	1.02312e+06	3.8318e+06	4.67467e+06	977984	1.68193e+06	639818	1.4836e+06
FALSE	High	Master Protein	TGGT1_363030-t26_1-p1	transcript=TGGT1_363030-t26_1 | gene=TGGT1_363030 | organism=Toxoplasma_gondii_GT1 | gene_product=Protein kinase domain-containing protein [Source:UniProtKB/TrEMBL;Acc:A0A125YM50] | transcript_product=rhoptry protein ROP8 | location=AAQM03000199:1511-3196(+) | protein_length=561 | sequence_SO=contig | SO=protein_coding_gene | is_pseudo=false	0	264.504	54	23	893	20	561	64	7.93	1931.9	23	1.342	1.338	0.42	0.42	0.635824	0.26093	0.971725	0.812006	25.51	1.33	0.65	0.12	0.42	0.41	0.42	0.81	2.83971e+08	2.78966e+08	2.07248e+08	8.62	12.37	6.54	2.99835e+08	2.52631e+08	2.83971e+08	2.78966e+08	2.60034e+08	3.29334e+08	2.40017e+08	2.43347e+08	2.9286e+08	2.07248e+08	2.20303e+08	1.9324e+08
FALSE	High	Master Protein	TGGT1_227810-t26_1-p1	transcript=TGGT1_227810-t26_1 | gene=TGGT1_227810 | organism=Toxoplasma_gondii_GT1 | gene_product=Protein kinase domain-containing protein [Source:UniProtKB/TrEMBL;Acc:S7W5X8] | transcript_product=rhoptry kinase family protein ROP11 (incomplete catalytic triad) | location=TGGT1_chrX:715479-717059(+) | protein_length=526 | sequence_SO=chromosome | SO=protein_coding_gene | is_pseudo=false	0	233.537	54	22	609	22	526	58.2	8.4	1435.26	22	1.144	1.17	0.19	0.23	0.998929	0.443658	0.998929	0.924827	15.35	13.85	-0.14	0.19	0.34	0.23	0.08	0.61	2.53808e+08	2.13769e+08	2.18118e+08	13.62	5.07	2.47	1.98429e+08	2.54142e+08	2.53808e+08	2.13769e+08	1.98255e+08	2.18674e+08	3.66718e+08	2.16393e+08	3.02051e+08	2.10022e+08	2.20068e+08	1.99288e+08
FALSE	High	Master Protein	TGGT1_309590-t26_1-p1	transcript=TGGT1_309590-t26_1 | gene=TGGT1_309590 | organism=Toxoplasma_gondii_GT1 | gene_product=Rhoptry protein ROP1 [Source:UniProtKB/TrEMBL;Acc:S7W7R3] | transcript_product=rhoptry protein ROP1 | location=TGGT1_chrXI:707942-709312(+) | protein_length=456 | sequence_SO=chromosome | SO=protein_coding_gene | is_pseudo=false	0	209.005	37	16	1145	16	456	49.5	5.22	2613.92	16	0.919	0.959	-0.12	-0.06	0.517896	0.813078	0.951523	0.987776	6.37	14.58	-0.12	-0.18	-0.03	0.09	-0.06	-0.34	2.28982e+09	2.24515e+09	2.6482e+09	6.93	18.48	4.09	2.55076e+09	2.24914e+09	2.28982e+09	2.24515e+09	2.33558e+09	1.63228e+09	2.48652e+09	2.5083e+09	2.08499e+09	2.79535e+09	2.66766e+09	2.47457e+09
FALSE	High	Master Protein	TGGT1_316650-t26_1-p1	transcript=TGGT1_316650-t26_1 | gene=TGGT1_316650 | organism=Toxoplasma_gondii_GT1 | gene_product=hypothetical protein | transcript_product=hypothetical protein | location=TGGT1_chrXI:5404029-5408889(-) | protein_length=1278 | sequence_SO=chromosome | SO=protein_coding_gene | is_pseudo=false	0	206.869	44	37	152	37	1278	135.2	6.2	251.46	37	19.913	24.526	4.32	4.62	1e-17	1e-17	4.24211e-16	2.015e-16	7.38	52.89	4.32	4.24	4.51	3.98	4.62	5.4	1.67933e+07	2.08845e+07	69709.8	16.83	29.16	55.95	1.41848e+07	1.98866e+07	1.67933e+07	2.08845e+07	1.55034e+07	2.79771e+07		36106.9	181239	146767	143664	51580.5
FALSE	High	Master Protein	TGGT1_318440-t26_1-p1	transcript=TGGT1_318440-t26_1 | gene=TGGT1_318440 | organism=Toxoplasma_gondii_GT1 | gene_product=Helicase associated domain (Ha2) protein [Source:UniProtKB/TrEMBL;Acc:S7UJM8] | transcript_product=helicase associated domain (ha2) protein | location=TGGT1_chrIV:1264045-1277404(-) | protein_length=2234 | sequence_SO=chromosome | SO=protein_coding_gene | is_pseudo=false	0	201.181	29	47	243	47	2234	236.8	8.97	251.39	47	0.914	0.618	-0.13	-0.7	0.507899	0.349236	0.951523	0.883421	13.42	2.37	0.01	-0.13	-0.73	-0.67	-0.7	-1.79	2.30197e+07	1.43438e+07	2.70146e+07	9.61	21.03	13.7	2.53621e+07	2.09244e+07	2.30197e+07	1.43438e+07	1.51738e+07	1.00129e+07	1.64583e+07	1.57591e+07	1.21449e+07	2.59371e+07	2.70146e+07	3.97845e+07
FALSE	High	Master Protein	TGGT1_262050-t26_1-p1	transcript=TGGT1_262050-t26_1 | gene=TGGT1_262050 | organism=Toxoplasma_gondii_GT1 | gene_product=Protein kinase domain-containing protein [Source:UniProtKB/TrEMBL;Acc:S7UY96] | transcript_product=rhoptry kinase family protein ROP39 | location=TGGT1_chrVIIb:1382528-1384294(+) | protein_length=588 | sequence_SO=chromosome | SO=protein_coding_gene | is_pseudo=false	0	199.769	45	22	684	22	588	65.1	8.76	1291.47	22	1.188	1.19	0.25	0.25	0.910338	0.416565	0.995562	0.920068	4.5	1.9	-0.13	0.29	0.25	0.23	0.25	0.54	2.59129e+08	2.75121e+08	2.46032e+08	9.85	8.65	9.46	2.31527e+08	2.8219e+08	2.59129e+08	2.8991e+08	2.44202e+08	2.75121e+08	3.274e+08	2.53417e+08	3.23016e+08	2.35695e+08	2.46032e+08	2.08447e+08
FALSE	High	Master Protein	TGGT1_320490-t26_1-p1	transcript=TGGT1_320490-t26_1 | gene=TGGT1_320490 | organism=Toxoplasma_gondii_GT1 | gene_product=Lactamase_B domain-containing protein [Source:UniProtKB/TrEMBL;Acc:S7VSP7] | transcript_product=N-acyl-phosphatidylethanolamine-hydrolyzing phospholipase D family protein | location=TGGT1_chrIV:252635-256451(-) | protein_length=1134 | sequence_SO=chromosome | SO=protein_coding_gene | is_pseudo=false	0	190.647	38	30	277	30	1134	126.1	6.73	407.56	30	0.968	1.413	-0.05	0.5	0.623314	0.204183	0.971725	0.736079	0.51	4.31	-0.05	-0.02	-0.05	0.5	0.54	0.08	1.54632e+07	2.11494e+07	1.35414e+07	1.9	14.59	9.86	1.54632e+07	1.58735e+07	1.53e+07	2.12228e+07	2.11494e+07	1.62496e+07	2.01627e+07	2.01308e+07	1.58394e+07	1.19981e+07	1.35414e+07	1.77443e+07
FALSE	High	Master Protein	TGGT1_258580-t26_1-p1	transcript=TGGT1_258580-t26_1 | gene=TGGT1_258580 | organism=Toxoplasma_gondii_GT1 | gene_product=Protein kinase domain-containing protein [Source:UniProtKB/TrEMBL;Acc:S7W7J7] | transcript_product=rhoptry protein ROP17 | location=TGGT1_chrVIIb:3287362-3289188(-) | protein_length=608 | sequence_SO=chromosome | SO=protein_coding_gene | is_pseudo=false	0	180.429	45	18	496	18	608	69	9.57	738.36	18	0.972	0.708	-0.04	-0.5	0.630323	0.567144	0.971725	0.962677	14.83	6.26	-0.41	-0.04	0.11	-0.5	-0.56	-0.22	9.27548e+07	6.38974e+07	9.34339e+07	23.83	16.35	21.2	6.27352e+07	1.01769e+08	9.27548e+07	7.53504e+07	6.38974e+07	5.42843e+07	9.15456e+07	6.49531e+07	7.13686e+07	1.10096e+08	1.15934e+08	1.17464e+08
FALSE	High	Master Protein	TGGT1_291960-t26_1-p1	transcript=TGGT1_291960-t26_1 | gene=TGGT1_291960 | organism=Toxoplasma_gondii_GT1 | gene_product=Kinase-like domain-containing protein [Source:UniProtKB/TrEMBL;Acc:S7UNX9] | transcript_product=rhoptry kinase family protein ROP40 (incomplete catalytic triad) | location=TGGT1_chrIX:4241532-4244563(+) | protein_length=525 | sequence_SO=chromosome | SO=protein_coding_gene | is_pseudo=false	0	173.247	52	22	366	22	525	57.9	7.43	781.95	22	0.844	2.303	-0.24	1.2	0.369283	0.0101341	0.938934	0.0960951	9.75	29.68	-0.15	-0.79	-0.24	1.61	1.2	0.88	3.32234e+07	9.5483e+07	3.32443e+07	20.16	23.49	11.7	4.60108e+07	3.27432e+07	3.32234e+07	1.17728e+08	9.5483e+07	7.29216e+07	1.24775e+08	9.98256e+07	7.13577e+07	3.08057e+07	3.32443e+07	3.86297e+07
FALSE	High	Master Protein	TGGT1_315690-t26_1-p1	transcript=TGGT1_315690-t26_1 | gene=TGGT1_315690 | organism=Toxoplasma_gondii_GT1 | gene_product=J domain-containing protein [Source:UniProtKB/TrEMBL;Acc:S7UM22] | transcript_product=DnaJ domain-containing protein | location=TGGT1_chrXI:4848691-4851649(+) | protein_length=294 | sequence_SO=chromosome | SO=protein_coding_gene | is_pseudo=false	0	170.017	64	21	274	21	294	34.3	8.9	531.15	21	0.988	1.203	-0.02	0.27	0.665182	0.400127	0.971725	0.913604	2.27	16.03	-0.02	-0.04	0.12	0.27	0.1	0.61	4.77092e+07	5.36259e+07	4.74132e+07	5.67	4.64	2.25	4.77092e+07	4.6822e+07	5.20035e+07	5.61313e+07	5.11522e+07	5.36259e+07	7.07439e+07	5.86711e+07	6.66978e+07	4.6553e+07	4.74132e+07	4.86801e+07
FALSE	High	Master Protein	TGGT1_213900-t26_1-p1	transcript=TGGT1_213900-t26_1 | gene=TGGT1_213900 | organism=Toxoplasma_gondii_GT1 | gene_product=RanBP2-type domain-containing protein [Source:UniProtKB/TrEMBL;Acc:S7UNK6] | transcript_product=regulator of chromosome condensation RCC1 | location=TGGT1_chrV:1284029-1290918(-) | protein_length=1155 | sequence_SO=chromosome | SO=protein_coding_gene | is_pseudo=false	0	166.743	30	21	163	21	1155	122.5	6.65	337.05	21	0.698	0.128	-0.52	-2.97	0.144193	2.89713e-07	0.63163	4.86477e-06	22.92	7.71	-1.03	-0.28	-0.52	-2.97	-3.04	-2.42	1.09078e+07	1.38908e+06	1.60923e+07	20.87	11.16	13.18	8.51329e+06	1.30241e+07	1.09078e+07	1.64755e+06	1.38908e+06	1.34603e+06	4.56065e+06	2.47976e+06	2.64042e+06	1.77216e+07	1.60923e+07	1.86414e+07
FALSE	High	Master Protein	TGGT1_215775-t26_1-p1	transcript=TGGT1_215775-t26_1 | gene=TGGT1_215775 | organism=Toxoplasma_gondii_GT1 | gene_product=Protein kinase domain-containing protein [Source:UniProtKB/TrEMBL;Acc:A0A125YM30] | transcript_product=rhoptry protein ROP8 | location=TGGT1_chrX:7045451-7047178(+) | protein_length=575 | sequence_SO=chromosome | SO=protein_coding_gene | is_pseudo=false	0	160.325	47	19	530	16	575	65.4	9.09	1025.21	19	1.045	1.018	0.06	0.03	0.790449	0.692916	0.995562	0.973941	1	3.82	-0.81	0.06	0.07	0.03	0.06	-0.32	6.86537e+07	5.71197e+07	5.99082e+07	16.38	17.53	9.55	5.70802e+07	7.94854e+07	6.86537e+07	6.62769e+07	5.71197e+07	4.64478e+07	6.11223e+07	5.99082e+07	5.26619e+07	6.37135e+07	7.48607e+07	8.05545e+07
FALSE	High	Master Protein	TGGT1_305270-t26_1-p1	transcript=TGGT1_305270-t26_1 | gene=TGGT1_305270 | organism=Toxoplasma_gondii_GT1 | gene_product=hypothetical protein | transcript_product=hypothetical protein | location=TGGT1_chrIX:5105581-5110076(+) | protein_length=738 | sequence_SO=chromosome | SO=protein_coding_gene | is_pseudo=false	0	160.028	44	24	331	24	738	82.3	8.87	390.06	24	1.09	0.961	0.12	-0.06	0.887035	0.808274	0.995562	0.987776	32.79	17.78	-0.24	0.63	0.12	-0.06	-0.22	0.66	3.18765e+07	3.1639e+07	2.83759e+07	25.49	30.48	5.15	2.70453e+07	4.40205e+07	3.18765e+07	3.1639e+07	2.39637e+07	4.40233e+07	3.93666e+07	2.84492e+07	4.21207e+07	2.68957e+07	3.06252e+07	2.77396e+07
FALSE	High	Master Protein	TGGT1_249990-t26_1-p1	transcript=TGGT1_249990-t26_1 | gene=TGGT1_249990 | organism=Toxoplasma_gondii_GT1 | gene_product=hypothetical protein | transcript_product=hypothetical protein | location=TGGT1_chrXII:4909167-4913985(-) | protein_length=838 | sequence_SO=chromosome | SO=protein_coding_gene | is_pseudo=false	0	158.172	44	28	248	28	838	92.7	8.25	350.67	28	0.991	1.19	-0.01	0.25	0.672563	0.41743	0.971725	0.920068	3.92	19.03	0.03	-0.06	-0.01	0.25	0.42	-0.64	1.76134e+07	1.97851e+07	1.79594e+07	18.15	36.57	3.64	2.2771e+07	1.76134e+07	1.628e+07	1.97851e+07	2.35641e+07	1.07342e+07	1.46277e+07	1.74079e+07	1.16041e+07	1.79594e+07	2.02382e+07	2.31534e+07
FALSE	High	Master Protein	TGGT1_266970-t26_1-p1	transcript=TGGT1_266970-t26_1 | gene=TGGT1_266970 | organism=Toxoplasma_gondii_GT1 | gene_product=Ubiquitin-like domain-containing protein [Source:UniProtKB/TrEMBL;Acc:S7UHF3] | transcript_product=hypothetical protein | location=TGGT1_chrIX:700995-702987(+) | protein_length=306 | sequence_SO=chromosome | SO=protein_coding_gene | is_pseudo=false	0	154.212	69	19	407	19	306	35.1	7.61	1013.03	19	0.839	1.196	-0.25	0.26	0.361066	0.409771	0.938934	0.920068	2.34	6.45	-0.28	-0.25	-0.22	0.26	0.19	0.53	9.78924e+07	1.16505e+08	1.10839e+08	5.68	6.47	6.81	9.54251e+07	9.78924e+07	1.06254e+08	1.17672e+08	1.04472e+08	1.16505e+08	1.33892e+08	1.15319e+08	1.32633e+08	9.33228e+07	1.00392e+08	1.10839e+08
FALSE	High	Master Protein	TGGT1_252360-t26_1-p1	transcript=TGGT1_252360-t26_1 | gene=TGGT1_252360 | organism=Toxoplasma_gondii_GT1 | gene_product=Protein kinase domain-containing protein [Source:UniProtKB/TrEMBL;Acc:S7VW28] | transcript_product=rhoptry kinase family protein ROP24 (incomplete catalytic triad) | location=TGGT1_chrIII:494762-496369(+) | protein_length=535 | sequence_SO=chromosome | SO=protein_coding_gene | is_pseudo=false	0	147.694	39	16	469	16	535	60.8	9.45	899.67	16	0.954	1.025	-0.07	0.04	0.592081	0.678491	0.971725	0.973941	1.06	2.19	-0.07	-0.32	-0.06	0.18	0.01	0.04	9.9853e+07	1.08396e+08	1.17463e+08	7.09	6.21	3.41	1.07932e+08	9.37229e+07	9.9853e+07	1.19581e+08	1.06899e+08	1.08396e+08	1.1938e+08	1.16096e+08	1.26399e+08	1.17463e+08	1.10761e+08	1.04163e+08
FALSE	High	Master Protein	TGGT1_204480-t26_1-p1	transcript=TGGT1_204480-t26_1 | gene=TGGT1_204480 | organism=Toxoplasma_gondii_GT1 | gene_product=Thioredoxin domain-containing protein [Source:UniProtKB/TrEMBL;Acc:S7WA21] | transcript_product=thioredoxin domain-containing protein | location=TGGT1_chrVIIa:1656821-1664723(-) | protein_length=659 | sequence_SO=chromosome | SO=protein_coding_gene | is_pseudo=false	0	144.795	32	18	355	18	659	72.1	8.56	764.16	18	0.722	1.281	-0.47	0.36	0.174538	0.313965	0.691058	0.866898	11.04	14.6	0.15	-0.47	-0.57	0.36	0.55	0.21	5.52141e+07	8.74255e+07	6.06647e+07	20.63	2.52	17.31	7.02567e+07	4.68742e+07	5.52141e+07	9.11828e+07	8.72049e+07	8.74255e+07	9.1028e+07	8.62455e+07	8.86669e+07	6.01679e+07	6.06517e+07	7.61251e+07
FALSE	High	Master Protein	TGGT1_212300-t26_1-p1	transcript=TGGT1_212300-t26_1 | gene=TGGT1_212300 | organism=Toxoplasma_gondii_GT1 | gene_product=hypothetical protein | transcript_product=hypothetical protein | location=TGGT1_chrX:3837742-3842895(+) | protein_length=683 | sequence_SO=chromosome | SO=protein_coding_gene | is_pseudo=false	0	141.034	43	25	281	25	683	75.6	6.51	474.75	25	0.936	1.056	-0.09	0.08	0.555224	0.621238	0.960323	0.973941	13.49	17.72	0.07	-0.22	-0.09	0.08	0.24	-0.97	1.97223e+07	1.8901e+07	2.35647e+07	12.04	50.37	6.51	2.31576e+07	1.83933e+07	1.97223e+07	1.8901e+07	2.6285e+07	8.38577e+06	1.52337e+07	1.92487e+07	1.02521e+07	2.31017e+07	2.40941e+07	2.9327e+07
FALSE	High	Master Protein	TGGT1_290700-t26_1-p1	transcript=TGGT1_290700-t26_1 | gene=TGGT1_290700 | organism=Toxoplasma_gondii_GT1 | gene_product=hypothetical protein | transcript_product=hypothetical protein | location=TGGT1_chrIX:3657972-3658910(+) | protein_length=312 | sequence_SO=chromosome | SO=protein_coding_gene | is_pseudo=false	0	136.997	43	12	191	12	312	34.5	9.67	457.32	12	0.813	1.111	-0.3	0.15	0.312875	0.529303	0.915853	0.960964	5.67	24.31	-0.3	-0.54	-0.24	0.37	0.15	-0.92	1.61246e+07	2.23246e+07	2.06878e+07	9	46.64	12.62	1.74914e+07	1.46006e+07	1.61246e+07	2.51529e+07	2.23246e+07	8.78678e+06	1.73337e+07	2.25686e+07	1.4061e+07	2.6081e+07	2.47888e+07	3.43355e+07
FALSE	High	Master Protein	TGGT1_226250-t26_1-p1	transcript=TGGT1_226250-t26_1 | gene=TGGT1_226250 | organism=Toxoplasma_gondii_GT1 | gene_product=DEAD (Asp-Glu-Ala-Asp) box polypeptide DDX3X [Source:UniProtKB/TrEMBL;Acc:A0A125YSI6] | transcript_product=DEAD (Asp-Glu-Ala-Asp) box polypeptide DDX3X | location=TGGT1_chrX:1667417-1670378(+) | protein_length=734 | sequence_SO=chromosome | SO=protein_coding_gene | is_pseudo=false	0	134.669	45	24	179	24	734	78.5	9.09	237.53	24	1.557	0.916	0.64	-0.13	0.360908	0.907921	0.938934	0.987776	4.57	0.81	0.64	0.68	0.34	-0.12	-0.28	-0.13	2.18545e+07	1.06549e+07	1.13821e+07	18.5	11.96	2.21	2.47726e+07	2.18545e+07	1.70044e+07	1.06549e+07	8.62746e+06	1.07433e+07	1.06574e+07	1.06476e+07	9.63799e+06	1.13821e+07	1.20151e+07	1.52404e+07
FALSE	High	Master Protein	TGGT1_307810-t26_1-p1	transcript=TGGT1_307810-t26_1 | gene=TGGT1_307810 | organism=Toxoplasma_gondii_GT1 | gene_product=hypothetical protein | transcript_product=hypothetical protein | location=TGGT1_chrXII:366832-371762(-) | protein_length=433 | sequence_SO=chromosome | SO=protein_coding_gene | is_pseudo=false	0	130.757	43	10	158	10	433	45.2	9.52	448.51	10	1.053	0.582	0.07	-0.78	0.807391	0.2729	0.995562	0.818481	0.43	32.42	0.07	0.07	0.32	-0.78	-0.43	-1.32	2.12098e+07	9.57346e+06	1.90529e+07	3.06	25.07	13.22	2.19683e+07	2.12098e+07	2.06716e+07	9.57346e+06	1.17483e+07	7.01736e+06	1.08408e+07	1.24351e+07	8.80916e+06	2.31659e+07	2.68295e+07	2.65247e+07
FALSE	High	Master Protein	TGGT1_240060-t26_1-p1	transcript=TGGT1_240060-t26_1 | gene=TGGT1_240060 | organism=Toxoplasma_gondii_GT1 | gene_product=hypothetical protein | transcript_product=hypothetical protein | location=TGGT1_chrVI:1027949-1030621(+) | protein_length=844 | sequence_SO=chromosome | SO=protein_coding_gene | is_pseudo=false	0	127.86	29	18	330	18	844	88.7	10.89	483.34	18	1.189	1.079	0.25	0.11	0.906901	0.582175	0.995562	0.972191	14.34	0.94	0.38	0	0.25	0.11	0.12	-0.77	2.69006e+07	2.28689e+07	2.33132e+07	14.54	37.71	3.4	3.09842e+07	2.31348e+07	2.69006e+07	2.28689e+07	2.66337e+07	1.18074e+07	1.77065e+07	2.14384e+07	1.69655e+07	2.33112e+07	2.70303e+07	3.21484e+07
FALSE	High	Master Protein	TGGT1_258390-t26_1-p1	transcript=TGGT1_258390-t26_1 | gene=TGGT1_258390 | organism=Toxoplasma_gondii_GT1 | gene_product=J domain-containing protein [Source:UniProtKB/TrEMBL;Acc:S7W7H7] | transcript_product=putative DnaJ protein | location=TGGT1_chrVIIb:3406355-3407941(-) | protein_length=397 | sequence_SO=chromosome | SO=protein_coding_gene | is_pseudo=false	0	127.067	47	14	228	14	397	44.6	6.93	471.26	14	1.09	1.22	0.12	0.29	0.887591	0.379653	0.995562	0.892961	5.43	0.8	0.18	0.12	-0.08	0.29	0.29	0.09	2.38053e+07	2.28009e+07	2.01219e+07	13.12	6.61	6.7	2.76805e+07	2.13632e+07	2.38053e+07	2.3326e+07	2.28009e+07	2.05591e+07	1.86607e+07	2.16484e+07	2.13442e+07	1.80792e+07	2.01219e+07	2.53607e+07
FALSE	High	Master Protein	TGGT1_304740-t26_1-p1	transcript=TGGT1_304740-t26_1 | gene=TGGT1_304740 | organism=Toxoplasma_gondii_GT1 | gene_product=Protein kinase domain-containing protein [Source:UniProtKB/TrEMBL;Acc:S7UUU5] | transcript_product=rhoptry kinase family protein ROP35 | location=TGGT1_chrVIIa:653060-656106(-) | protein_length=640 | sequence_SO=chromosome | SO=protein_coding_gene | is_pseudo=false	0	125.38	25	15	195	15	640	71.2	7.78	321.69	15	1.211	1.092	0.28	0.13	0.865784	0.559891	0.995562	0.962677	9.24	9.41	0.18	0.55	0.28	0.22	0.13	-0.34	3.81436e+07	2.76786e+07	2.56071e+07	15.45	20.57	17.75	3.81436e+07	4.38012e+07	3.20616e+07	2.76786e+07	3.16047e+07	2.07637e+07	2.5199e+07	3.0462e+07	2.13092e+07	3.16178e+07	3.3204e+07	3.69956e+07
FALSE	High	Master Protein	TGGT1_211290-t26_1-p1	transcript=TGGT1_211290-t26_1 | gene=TGGT1_211290 | organism=Toxoplasma_gondii_GT1 | gene_product=Rhoptry protein ROP15 [Source:UniProtKB/TrEMBL;Acc:S7UKJ6] | transcript_product=rhoptry protein ROP15 | location=TGGT1_chrIV:1780392-1782862(-) | protein_length=333 | sequence_SO=chromosome | SO=protein_coding_gene | is_pseudo=false	0	124.983	56	16	301	16	333	36.6	8.7	685.95	16	1.907	1.6	0.93	0.68	0.13047	0.109548	0.604361	0.55532	14.07	13.44	1.06	0.66	0.93	0.68	1.25	0.54	8.76645e+07	7.86375e+07	4.54629e+07	14.45	26.83	3.27	9.38083e+07	7.04037e+07	8.76645e+07	7.86375e+07	1.04635e+08	6.11891e+07	6.05652e+07	5.37961e+07	4.43521e+07	4.7309e+07	4.54629e+07	4.72782e+07
FALSE	High	Master Protein	TGGT1_255350-t26_1-p1	transcript=TGGT1_255350-t26_1 | gene=TGGT1_255350 | organism=Toxoplasma_gondii_GT1 | gene_product=Putative ATPase [Source:UniProtKB/TrEMBL;Acc:S7V2G3] | transcript_product=putative ATPase | location=TGGT1_chrVIIb:4787376-4795237(-) | protein_length=731 | sequence_SO=chromosome | SO=protein_coding_gene | is_pseudo=false	0	116.115	36	18	187	18	731	80.6	8.79	273.95	18	1.269	0.55	0.34	-0.86	0.75839	0.21238	0.995562	0.747503	8.72	3.44	0.34	0.43	0.1	-0.86	-0.72	-0.9	2.59333e+07	1.0732e+07	2.24135e+07	19.78	12.54	8.26	2.93331e+07	2.59333e+07	1.96048e+07	1.0732e+07	1.1786e+07	9.15579e+06	9.8872e+06	1.1537e+07	9.43666e+06	2.4272e+07	2.55393e+07	3.1673e+07
FALSE	High	Master Protein	TGGT1_295110-t26_1-p1	transcript=TGGT1_295110-t26_1 | gene=TGGT1_295110 | organism=Toxoplasma_gondii_GT1 | gene_product=Protein kinase domain-containing protein [Source:UniProtKB/TrEMBL;Acc:A0A125YJ16] | transcript_product=rhoptry protein ROP7 | location=AAQM03000462:293-2020(-) | protein_length=575 | sequence_SO=contig | SO=protein_coding_gene | is_pseudo=false	0	115.086	34	16	352	9	575	63.4	7.01	604.79	16	1.111	1.564	0.15	0.65	0.933364	0.123669	0.995562	0.590572	7.17	5.04	-0.26	0.15	0.22	0.56	0.69	0.65	1.98814e+07	2.40603e+07	2.23828e+07	16.99	7.6	19.86	1.46883e+07	2.02297e+07	1.98814e+07	2.40603e+07	2.2649e+07	2.63151e+07	1.84077e+07	1.86806e+07	2.59043e+07	1.72715e+07	2.23828e+07	1.52836e+07
FALSE	High	Master Protein	TGGT1_280560-t26_1-p1	transcript=TGGT1_280560-t26_1 | gene=TGGT1_280560 | organism=Toxoplasma_gondii_GT1 | gene_product=Selenide, water dikinase [Source:UniProtKB/TrEMBL;Acc:S7UU79] | transcript_product=selenide, water dikinase | location=TGGT1_chrVIIa:275729-285116(-) | protein_length=1298 | sequence_SO=chromosome | SO=protein_coding_gene | is_pseudo=false	0	114.98	26	26	158	26	1298	137.8	7.01	163.6	26	1.005	0.901	0.01	-0.15	0.70387	0.944481	0.971725	0.987776	9.66	7.78	0.01	0.1	-0.28	-0.15	0	-0.22	1.00054e+07	9.37787e+06	9.76e+06	7.03	6.11	8.51	1.11442e+07	1.00054e+07	9.79712e+06	9.37787e+06	9.84226e+06	8.71027e+06	9.38162e+06	9.70724e+06	9.37177e+06	9.76e+06	1.08053e+07	1.35304e+07
FALSE	High	Master Protein	TGGT1_202460-t26_1-p1	transcript=TGGT1_202460-t26_1 | gene=TGGT1_202460 | organism=Toxoplasma_gondii_GT1 | gene_product=Diacylglycerol kinase [Source:UniProtKB/TrEMBL;Acc:S7UUK3] | transcript_product=diacylglycerol kinase accessory domain (presumed) domain-containing protein | location=TGGT1_chrVIIa:3208196-3216030(-) | protein_length=679 | sequence_SO=chromosome | SO=protein_coding_gene | is_pseudo=false	0	114.3	33	18	253	18	679	73	8.51	397.54	18	0.902	0.863	-0.15	-0.21	0.483373	0.963882	0.951523	0.987776	18.47	14.1	-0.43	0.04	-0.15	-0.45	-0.07	-0.21	2.61482e+07	2.5441e+07	2.7886e+07	12.56	9.19	7.93	2.42117e+07	2.61482e+07	3.08228e+07	2.25093e+07	2.70397e+07	2.5441e+07	3.1845e+07	2.6641e+07	2.77928e+07	2.99679e+07	3.00811e+07	3.27763e+07
FALSE	High	Master Protein	TGGT1_264050-t26_1-p1	transcript=TGGT1_264050-t26_1 | gene=TGGT1_264050 | organism=Toxoplasma_gondii_GT1 | gene_product=UBIQUITIN_CONJUGAT_2 domain-containing protein [Source:UniProtKB/TrEMBL;Acc:A0A125YSJ6] | transcript_product=ubiquitin-conjugating enzyme subfamily protein | location=TGGT1_chrVIIb:189077-192724(+) | protein_length=302 | sequence_SO=chromosome | SO=protein_coding_gene | is_pseudo=false	0	110.298	45	12	87	12	302	34.4	5.27	195.59	12	3.395	47.853	1.76	5.58	0.00129464	1e-17	0.0212956	2.015e-16	127.27	119.44	-1.06	1.76	6.64		4.52	6.64	1.40377e+07	2.89843e+07	25512.6	24.21	30.29	49.03	1.2937e+07	1.99822e+07	1.40377e+07	2.89843e+07	23844659	4.2477e+07	36629				17769.9
FALSE	High	Master Protein	TGGT1_236650-t26_1-p1	transcript=TGGT1_236650-t26_1 | gene=TGGT1_236650 | organism=Toxoplasma_gondii_GT1 | gene_product=DEAD (Asp-Glu-Ala-Asp) box polypeptide 17 [Source:UniProtKB/TrEMBL;Acc:A0A125YWJ5] | transcript_product=DEAD (Asp-Glu-Ala-Asp) box polypeptide 17 | location=TGGT1_chrX:5362273-5365892(-) | protein_length=550 | sequence_SO=chromosome | SO=protein_coding_gene | is_pseudo=false	0	109.273	43	20	177	20	550	59.9	8.94	239.9	20	1.411	0.282	0.5	-1.83	0.53378	0.00245504	0.953376	0.0266115	3.84	0.09	0.53	0.5	0.14	-1.83	-1.57	-1.83	2.01703e+07	3.85109e+06	1.3393e+07	13.79	10.57	18.66	2.1981e+07	2.01703e+07	1.66631e+07	4.16128e+06	3.85109e+06	3.36606e+06	3.69876e+06	3.79002e+06	3.28251e+06	1.76277e+07	1.97447e+07	1.95168e+07
FALSE	High	Master Protein	TGGT1_208030-t26_1-p1	transcript=TGGT1_208030-t26_1 | gene=TGGT1_208030 | organism=Toxoplasma_gondii_GT1 | gene_product=Microneme protein MIC4 [Source:UniProtKB/TrEMBL;Acc:A0A125YP10] | transcript_product=microneme protein MIC4 | location=TGGT1_chrIb:547335-549077(+) | protein_length=580 | sequence_SO=chromosome | SO=protein_coding_gene | is_pseudo=false	0	108.367	33	17	263	17	580	63	5.22	418.6	17	1.686	1.019	0.75	0.03	0.250829	0.69045	0.838715	0.973941	11.93	18.47	0.75	0.63	1.75	0.2	0.03	-0.6	5.08063e+07	3.14056e+07	3.01434e+07	24.08	27.58	21.7	4.58756e+07	5.08063e+07	7.13014e+07	3.14056e+07	3.303e+07	1.90079e+07	1.99392e+07	3.00342e+07	1.88174e+07	3.53046e+07	4.17442e+07	5.51957e+07
FALSE	High	Master Protein	TGGT1_295125-t26_1-p1	transcript=TGGT1_295125-t26_1 | gene=TGGT1_295125 | organism=Toxoplasma_gondii_GT1 | gene_product=Protein kinase domain-containing protein [Source:UniProtKB/TrEMBL;Acc:S7UI50] | transcript_product=rhoptry protein ROP4 | location=TGGT1_chrIa:1394541-1396277(-) | protein_length=365 | sequence_SO=chromosome | SO=protein_coding_gene | is_pseudo=false	0	107.927	46	13	352	6	365	40.1	5.3	647.29	13	0.987	1.266	-0.02	0.34	0.663463	0.328708	0.971725	0.875727	3.65	18.15	-0.8	-0.02	0.02	0.34	0.51	0.13	1.48707e+07	1.56687e+07	1.2012e+07	20.69	3.7	11.76	1.02756e+07	1.48707e+07	1.53161e+07	1.53627e+07	1.64946e+07	1.56687e+07	1.17874e+07	1.2012e+07	1.67454e+07	1.1435e+07	1.5746e+07	1.44927e+07
FALSE	High	Master Protein	TGGT1_312420-t26_1-p1	transcript=TGGT1_312420-t26_1 | gene=TGGT1_312420 | organism=Toxoplasma_gondii_GT1 | gene_product=hypothetical protein | transcript_product=hypothetical protein | location=TGGT1_chrXI:2633576-2638766(-) | protein_length=1086 | sequence_SO=chromosome | SO=protein_coding_gene | is_pseudo=false	0	107.858	35	24	88	24	1086	117.8	8.18	68.44	24	1.087	1.091	0.12	0.13	0.882149	0.561824	0.995562	0.962677	15.76	0.98	-0.04	0.35	0.12	0.14	0.13	-0.66	5.79291e+06	4.83131e+06	4.5373e+06	12.33	33.92	2.93	4.82309e+06	6.15735e+06	5.79291e+06	4.83131e+06	4.95407e+06	2.49075e+06	4.03012e+06	4.38744e+06	2.93214e+06	4.5373e+06	5.05581e+06	7.36043e+06
FALSE	High	Master Protein	TGGT1_229010-t26_1-p1	transcript=TGGT1_229010-t26_1 | gene=TGGT1_229010 | organism=Toxoplasma_gondii_GT1 | gene_product=Rhoptry neck protein RON4 [Source:UniProtKB/TrEMBL;Acc:S7WIC1] | transcript_product=rhoptry neck protein RON4 | location=TGGT1_chrVIII:18238-24970(+) | protein_length=984 | sequence_SO=chromosome | SO=protein_coding_gene | is_pseudo=false	0	106.795	35	18	156	18	984	107.3	6.46	167.32	18	1.197	1.139	0.26	0.19	0.892903	0.487507	0.995562	0.933327	29.2	1.28	0.9	0.26	-0.06	0.19	0.26	0.17	8.97683e+06	8.9359e+06	7.55086e+06	26.75	16.12	8.75	1.34041e+07	8.97683e+06	8.38368e+06	7.32319e+06	8.9359e+06	1.01528e+07	7.04726e+06	8.96104e+06	8.37525e+06	7.16168e+06	7.55086e+06	1.04009e+07
FALSE	High	Master Protein	TGGT1_318160-t26_1-p1	transcript=TGGT1_318160-t26_1 | gene=TGGT1_318160 | organism=Toxoplasma_gondii_GT1 | gene_product=MSP domain-containing protein [Source:UniProtKB/TrEMBL;Acc:S7UKE9] | transcript_product=MSP (Major sperm protein) domain-containing protein | location=TGGT1_chrIV:1459846-1460565(+) | protein_length=239 | sequence_SO=chromosome | SO=protein_coding_gene | is_pseudo=false	0	105.237	56	10	260	10	239	26	7.55	374.61	10	1.196	0.99	0.26	-0.01	0.894231	0.747312	0.995562	0.976829	6.51	10.25	0.32	-0.2	0.26	-0.01	-0.2	0.09	7.31234e+07	4.27512e+07	4.41055e+07	16.66	4.27	4.84	7.31234e+07	7.61207e+07	5.51365e+07	4.51416e+07	4.27512e+07	4.15153e+07	4.51651e+07	4.17962e+07	4.11908e+07	4.52879e+07	5.81176e+07	5.70285e+07
FALSE	High	Master Protein	TGGT1_305940-t26_1-p1	transcript=TGGT1_305940-t26_1 | gene=TGGT1_305940 | organism=Toxoplasma_gondii_GT1 | gene_product=Peptidyl-prolyl cis-trans isomerase, cyclophilin-type domain-containing protein [Source:UniProtKB/TrEMBL;Acc:S7UIA8] | transcript_product=peptidyl-prolyl cis-trans isomerase, cyclophilin-type domain-containing protein | location=TGGT1_chrIX:5461956-5468636(+) | protein_length=612 | sequence_SO=chromo…	0	105.101	41	21	185	21	612	68.8	8.91	247.29	21	0.849	0.926	-0.24	-0.11	0.379741	0.886228	0.949873	0.987776	21.42	5.57	-0.43	0.07	-0.24	-0.11	-0.16	0.34	1.10942e+07	1.30961e+07	1.27339e+07	17.9	17.09	12.34	1.10942e+07	1.48286e+07	1.09458e+07	1.26893e+07	1.30961e+07	1.71096e+07	1.54588e+07	1.60323e+07	1.57776e+07	1.01182e+07	1.09197e+07	1.23187e+07
FALSE	High	Master Protein	TGGT1_262920-t26_1-p1	transcript=TGGT1_262920-t26_1 | gene=TGGT1_262920 | organism=Toxoplasma_gondii_GT1 | gene_product=PDZ_3 domain-containing protein [Source:UniProtKB/TrEMBL;Acc:S7UXW4] | transcript_product=trypsin domain-containing protein | location=TGGT1_chrVIIb:896939-905694(+) | protein_length=972 | sequence_SO=chromosome | SO=protein_coding_gene | is_pseudo=false	0	103.063	29	21	167	21	972	104.4	6.52	236.14	21	1.092	1.552	0.13	0.63	0.892218	0.128826	0.995562	0.590572	8.07	16.29	0.63	0.13	0.05	0.78	0.63	0.32	1.46312e+07	1.67592e+07	1.08955e+07	19.81	4.69	11.07	1.89196e+07	1.29653e+07	1.46312e+07	1.81351e+07	1.67157e+07	1.67592e+07	1.16435e+07	1.31691e+07	1.78453e+07	9.4312e+06	1.08955e+07	1.17771e+07
FALSE	High	Master Protein	TGGT1_265010-t26_1-p1	transcript=TGGT1_265010-t26_1 | gene=TGGT1_265010 | organism=Toxoplasma_gondii_GT1 | gene_product=PUA domain-containing protein [Source:UniProtKB/TrEMBL;Acc:S7UHV6] | transcript_product=glutamate 5-kinase domain-containing protein | location=TGGT1_chrIX:1658866-1665623(-) | protein_length=925 | sequence_SO=chromosome | SO=protein_coding_gene | is_pseudo=false	0	102.211	25	20	163	20	925	100.5	6.43	216.42	20	1.305	0.543	0.38	-0.88	0.696269	0.201155	0.971725	0.73032	17.08	36.05	0.54	0.38	0.21	-1.52	-0.88	-0.48	1.71052e+07	5.35304e+06	1.20827e+07	17.24	53.82	18.2	1.71052e+07	1.31007e+07	1.84879e+07	3.38837e+06	5.35304e+06	9.91093e+06	3.9602e+06	5.2083e+06	8.24699e+06	1.20827e+07	1.4975e+07	1.78212e+07
FALSE	High	Master Protein	TGGT1_267480-t26_1-p1	transcript=TGGT1_267480-t26_1 | gene=TGGT1_267480 | organism=Toxoplasma_gondii_GT1 | gene_product=Putative tRNA (Guanine(26)-N(2))-dimethyltransferase [Source:UniProtKB/TrEMBL;Acc:S7UHU1] | transcript_product=putative tRNA (guanine(26)-N(2))-dimethyltransferase | location=TGGT1_chrIX:450756-457443(-) | protein_length=697 | sequence_SO=chromosome | SO=protein_coding_gene | is_pseudo=false	0	100.859	32	16	115	16	697	76.1	8.32	128.79	16	1.019	0.138	0.03	-2.86	0.73379	8.11358e-07	0.981806	1.28226e-05	7.47	31.15	-0.05	0.49	0.03	-2.86	-2.23	-3.13	1.07279e+07	1.34793e+06	8.72799e+06	4.76	30.55	16.91	1.02037e+07	1.12248e+07	1.07279e+07	1.34793e+06	1.72242e+06	912088	1.479e+06	1.60878e+06	1.20075e+06	1.14918e+07	1.23119e+07	1.43067e+07
FALSE	High	Master Protein	TGGT1_203310-t26_1-p1	transcript=TGGT1_203310-t26_1 | gene=TGGT1_203310 | organism=Toxoplasma_gondii_GT1 | gene_product=Dense granule protein GRA7 [Source:UniProtKB/TrEMBL;Acc:A0A125YVB8] | transcript_product=dense granule protein GRA7 | location=TGGT1_chrVIIa:2502941-2503651(+) | protein_length=236 | sequence_SO=chromosome | SO=protein_coding_gene | is_pseudo=false	0	100.471	48	10	167	10	236	25.8	5.22	404.61	10	1.005	1.376	0.01	0.46	0.702547	0.230884	0.971725	0.779391	3.43	1.32	-0.03	0.09	0.01	0.46	0.47	-0.34	1.79202e+07	2.05311e+07	1.44689e+07	10.79	40.07	15.97	1.48633e+07	1.79202e+07	1.8141e+07	2.05311e+07	2.532e+07	1.05542e+07	1.41386e+07	1.86916e+07	1.24701e+07	1.8254e+07	2.01059e+07	2.26159e+07
FALSE	High	Master Protein	TGGT1_291890-t26_1-p1	transcript=TGGT1_291890-t26_1 | gene=TGGT1_291890 | organism=Toxoplasma_gondii_GT1 | gene_product=TgMIC1 domain-containing protein [Source:UniProtKB/TrEMBL;Acc:S7VXI3] | transcript_product=microneme protein MIC1 | location=TGGT1_chrIX:4200849-4203191(-) | protein_length=456 | sequence_SO=chromosome | SO=protein_coding_gene | is_pseudo=false	0	96.804	49	15	255	15	456	48.6	5.34	458.95	15	1.898	1.089	0.92	0.12	0.134229	0.564927	0.6078	0.962677	16.99	40.01	0.92	0.75	1.85	0.47	0.12	-0.67	5.02092e+07	2.8815e+07	2.32483e+07	21.55	47.35	22.11	4.6277e+07	5.02092e+07	6.84839e+07	3.09883e+07	2.8815e+07	1.07141e+07	1.64949e+07	2.85465e+07	1.36726e+07	3.25357e+07	3.66058e+07	4.98376e+07
FALSE	High	Master Protein	TGGT1_320100-t26_1-p1	transcript=TGGT1_320100-t26_1 | gene=TGGT1_320100 | organism=Toxoplasma_gondii_GT1 | gene_product=RNA recognition motif-containing protein [Source:UniProtKB/TrEMBL;Acc:S7VYK2] | transcript_product=RNA recognition motif-containing protein | location=TGGT1_chrIV:443805-449909(+) | protein_length=1216 | sequence_SO=chromosome | SO=protein_coding_gene | is_pseudo=false	0	96.695	23	20	188	20	1216	128.8	8.5	197.35	20	1.168	0.427	0.22	-1.23	0.949531	0.0549967	0.995562	0.349034	0.5	7.73	0.22	0.23	0.1	-1.15	-1.23	-1.33	1.69877e+07	6.76401e+06	1.89038e+07	15.95	14.37	2.77	2.11794e+07	1.57008e+07	1.69877e+07	6.76401e+06	6.83202e+06	5.23675e+06	7.66151e+06	7.06846e+06	7.08624e+06	1.89038e+07	1.84784e+07	2.21038e+07
FALSE	High	Master Protein	TGGT1_235140-t26_1-p1	transcript=TGGT1_235140-t26_1 | gene=TGGT1_235140 | organism=Toxoplasma_gondii_GT1 | gene_product=hypothetical protein | transcript_product=hypothetical protein | location=TGGT1_chrX:4531284-4533475(+) | protein_length=342 | sequence_SO=chromosome | SO=protein_coding_gene | is_pseudo=false	0	94.824	71	14	206	14	342	36.6	11.34	387.87	14	1.334	1.507	0.42	0.59	0.649055	0.149845	0.971725	0.63902	7.36	10.42	0.27	0.49	0.42	0.59	0.27	0.69	1.31067e+07	1.26631e+07	9.2728e+06	12.85	7.49	11.47	1.06383e+07	1.31067e+07	1.36395e+07	1.33742e+07	1.15153e+07	1.26631e+07	1.26185e+07	1.23414e+07	1.28812e+07	7.78415e+06	9.2728e+06	9.74808e+06
FALSE	High	Master Protein	TGGT1_202200-t26_1-p1	transcript=TGGT1_202200-t26_1 | gene=TGGT1_202200 | organism=Toxoplasma_gondii_GT1 | gene_product=hypothetical protein | transcript_product=hypothetical protein | location=TGGT1_chrVIIa:3420532-3424661(-) | protein_length=793 | sequence_SO=chromosome | SO=protein_coding_gene | is_pseudo=false	0	93.879	31	17	185	17	793	87.1	8.13	234.55	17	1.299	0.806	0.38	-0.31	0.706187	0.819692	0.971725	0.987776	1.71	1.18	-0.39	0.39	0.38	-0.3	-0.31	-0.44	1.5582e+07	1.04003e+07	1.70203e+07	12.23	21.29	11.02	1.31356e+07	1.67726e+07	1.5582e+07	1.24947e+07	1.04003e+07	8.09813e+06	1.18165e+07	1.03139e+07	9.91741e+06	1.9103e+07	1.94463e+07	1.97361e+07
FALSE	High	Master Protein	TGGT1_270770-t26_1-p1	transcript=TGGT1_270770-t26_1 | gene=TGGT1_270770 | organism=Toxoplasma_gondii_GT1 | gene_product=PWI domain-containing protein [Source:UniProtKB/TrEMBL;Acc:S7WD91] | transcript_product=PWI domain-containing protein | location=TGGT1_chrVIII:4997193-5006045(-) | protein_length=782 | sequence_SO=chromosome | SO=protein_coding_gene | is_pseudo=false	0	92.176	28	19	234	19	782	87.1	6.98	298.34	19	1.004	0.625	0.01	-0.68	0.701006	0.365712	0.971725	0.888356	0.39	16.65	0.01	0.01	-0.22	-0.68	-0.51	-0.91	1.47438e+07	9.90692e+06	1.6901e+07	21.2	16.11	5.57	1.85467e+07	1.47438e+07	1.21624e+07	1.05585e+07	9.90692e+06	7.67607e+06	1.41237e+07	1.16801e+07	1.11654e+07	1.83687e+07	1.65578e+07	1.92485e+07
FALSE	High	Master Protein	TGGT1_225870-t26_1-p1	transcript=TGGT1_225870-t26_1 | gene=TGGT1_225870 | organism=Toxoplasma_gondii_GT1 | gene_product=hypothetical protein | transcript_product=hypothetical protein | location=TGGT1_chrX:1888092-1892831(+) | protein_length=1579 | sequence_SO=chromosome | SO=protein_coding_gene | is_pseudo=false	0	89.314	16	14	102	14	1579	161.1	6.43	131.2	14	0.88	0.674	-0.18	-0.57	0.439846	0.482525	0.949873	0.932651	4.24	30.35	0.09	-0.18	-0.22	-0.57	-0.24	-1.25	4.11511e+06	2.34255e+06	4.50296e+06	10.81	20.63	22.24	4.12622e+06	3.39436e+06	4.11511e+06	2.34255e+06	2.76919e+06	1.81788e+06	2.80779e+06	2.80402e+06	2.22152e+06	3.86111e+06	4.50296e+06	5.93102e+06
FALSE	High	Master Protein	TGGT1_309600-t26_1-p1	transcript=TGGT1_309600-t26_1 | gene=TGGT1_309600 | organism=Toxoplasma_gondii_GT1 | gene_product=hypothetical protein | transcript_product=hypothetical protein | location=TGGT1_chrXI:713110-720853(+) | protein_length=960 | sequence_SO=chromosome | SO=protein_coding_gene | is_pseudo=false	0	88.109	26	18	117	18	960	106.5	9.67	124.96	18	1.235	0.757	0.3	-0.4	0.819197	0.693512	0.995562	0.973941	11.62	18.78	0.3	0.61	0.19	-0.4	-0.21	-0.84	7.52869e+06	4.30419e+06	7.18017e+06	3.05	24.57	18.1	7.66718e+06	7.52869e+06	7.22126e+06	4.34638e+06	4.30419e+06	2.71355e+06	3.04616e+06	3.48873e+06	2.70589e+06	6.27818e+06	7.18017e+06	9.75431e+06
FALSE	High	Master Protein	TGGT1_209985-t26_1-p1	transcript=TGGT1_209985-t26_1 | gene=TGGT1_209985 | organism=Toxoplasma_gondii_GT1 | gene_product=Protein kinase domain-containing protein [Source:UniProtKB/TrEMBL;Acc:S7VXT1] | transcript_product=cAMP-dependent protein kinase | location=TGGT1_chrIb:1628949-1629743(-) | protein_length=264 | sequence_SO=chromosome | SO=protein_coding_gene | is_pseudo=false	0	85.099	54	11	170	10	264	29.6	9.35	297.91	11	0.488	0.801	-1.03	-0.32	0.0118799	0.807514	0.136788	0.987776	20.74	30.64	-0.82	-1.03	-1.26	-0.32	0.01	-2.31	1.16604e+07	1.62687e+07	2.33729e+07	7.47	51.94	30.27	1.20827e+07	1.04425e+07	1.16604e+07	1.62687e+07	17452562	5.22592e+06	1.62084e+07	1.44969e+07	7.33196e+06	1.85564e+07	2.33729e+07	3.34613e+07
FALSE	High	Master Protein	TGGT1_249900-t26_1-p1	transcript=TGGT1_249900-t26_1 | gene=TGGT1_249900 | organism=Toxoplasma_gondii_GT1 | gene_product=Putative adenine nucleotide translocator [Source:UniProtKB/TrEMBL;Acc:A0A125YLS5] | transcript_product=putative adenine nucleotide translocator | location=TGGT1_chrXII:4873424-4874380(+) | protein_length=318 | sequence_SO=chromosome | SO=protein_coding_gene | is_pseudo=false	0	84.462	46	14	260	14	318	35.2	9.74	443.3	14	0.809	1.14	-0.31	0.19	0.306869	0.485305	0.912625	0.933327	20.73	12.17	0.22	-0.49	-0.31	0.19	0.3	-1.33	6.08479e+07	5.9597e+07	5.8705e+07	26.72	46.45	29.11	6.08479e+07	3.71408e+07	6.29479e+07	6.39649e+07	5.9597e+07	2.27312e+07	3.86862e+07	4.80248e+07	3.91167e+07	5.8705e+07	7.2689e+07	8.62726e+07
FALSE	High	Master Protein	TGGT1_233220-t26_1-p1	transcript=TGGT1_233220-t26_1 | gene=TGGT1_233220 | organism=Toxoplasma_gondii_GT1 | gene_product=hypothetical protein | transcript_product=hypothetical protein | location=TGGT1_chrVIII:2508163-2514202(-) | protein_length=1476 | sequence_SO=chromosome | SO=protein_coding_gene | is_pseudo=false	0	83.168	17	20	107	20	1476	159.9	6.54	92.61	20	1.125	0.741	0.17	-0.43	0.961333	0.652889	0.995562	0.973941	4.44	14.28	0.21	0.07	0.17	-0.43	-0.29	-0.57	8.61328e+06	4.14184e+06	6.88363e+06	17.45	5.94	11.17	8.77704e+06	6.31187e+06	8.61328e+06	4.30542e+06	4.14184e+06	3.82687e+06	4.83124e+06	4.43071e+06	4.69311e+06	7.67041e+06	8.39028e+06	1.12592e+07
FALSE	High	Master Protein	TGGT1_311240-t26_1-p1	transcript=TGGT1_311240-t26_1 | gene=TGGT1_311240 | organism=Toxoplasma_gondii_GT1 | gene_product=Putative DnaJ family chaperone [Source:UniProtKB/TrEMBL;Acc:S7UT35] | transcript_product=putative DnaJ family chaperone | location=TGGT1_chrXI:1865804-1870827(-) | protein_length=426 | sequence_SO=chromosome | SO=protein_coding_gene | is_pseudo=false	0	82.971	45	13	143	13	426	47.4	6.84	273.3	13	1.146	1.077	0.2	0.11	0.993917	0.584461	0.998872	0.972191	12.55	14.53	0.2	0.38	0.07	0.26	0.11	-0.04	1.42109e+07	1.09451e+07	1.07057e+07	8.62	3.16	13.78	1.42109e+07	1.38969e+07	1.62454e+07	1.11359e+07	1.09451e+07	1.0471e+07	8.90418e+06	8.74418e+06	9.28654e+06	1.15086e+07	1.19119e+07	1.52733e+07
FALSE	High	Master Protein	TGGT1_210370-t26_1-p1	transcript=TGGT1_210370-t26_1 | gene=TGGT1_210370 | organism=Toxoplasma_gondii_GT1 | gene_product=hypothetical protein | transcript_product=hypothetical protein | location=TGGT1_chrIX:4634440-4635879(-) | protein_length=479 | sequence_SO=chromosome | SO=protein_coding_gene | is_pseudo=false	0	81.909	32	11	109	11	479	52.4	9.14	146.55	11	1.043	0.895	0.06	-0.16	0.786843	0.959176	0.995562	0.987776	16.73	2.4	0.06	0.28	-0.11	-0.16	-0.18	-0.11	9.4453e+06	6.81315e+06	7.45894e+06	3.85	10.61	6.51	8.96961e+06	9.4453e+06	9.67602e+06	6.8852e+06	5664313	6.81315e+06	6.3849e+06	6.18535e+06	6.68969e+06	7.67283e+06	8.28175e+06	9.74231e+06
FALSE	High	Master Protein	TGGT1_258870A-t26_1-p1	transcript=TGGT1_258870A-t26_1 | gene=TGGT1_258870A | organism=Toxoplasma_gondii_GT1 | gene_product=hypothetical protein | transcript_product=hypothetical protein | location=TGGT1_chrVIIb:3082018-3084228(-) | protein_length=557 | sequence_SO=chromosome | SO=protein_coding_gene | is_pseudo=false	0	81.892	34	16	115	9	557	60.6	5.07	143.02	16	1.229	0.923	0.3	-0.12	0.830501	0.89245	0.995562	0.987776	2.91	29.14	0.27	0.42	0.3	-0.12	0.2	-0.61	5.22245e+06	4.19088e+06	3.75901e+06	16.02	27.11	13.19	5.39067e+06	5.22245e+06	3.96607e+06	4.30635e+06	4.19088e+06	2.52639e+06	2.85508e+06	3.75901e+06	3.38733e+06	5.08139e+06	5.56046e+06	5.76569e+06
FALSE	High	Master Protein	TGGT1_275650-t26_1-p1	transcript=TGGT1_275650-t26_1 | gene=TGGT1_275650 | organism=Toxoplasma_gondii_GT1 | gene_product=hypothetical protein | transcript_product=hypothetical protein | location=TGGT1_chrIII:288290-290923(+) | protein_length=877 | sequence_SO=chromosome | SO=protein_coding_gene | is_pseudo=false	0	79.121	30	22	55	22	877	101.1	9.19	44.34	22	2.66	0.494	1.41	-1.02	0.0125444	0.126042	0.13775	0.590572	7	35.75	1.48	1.41	1.03	-1.02	0.32	-1.33	5.22991e+06	1.02374e+06	1.90778e+06	32.23	32.4	41.76	6.70385e+06	3.41256e+06	5.22991e+06	1.02374e+06	1.38076e+06	708696	674917	876377	897533	3.99312e+06	4.82708e+06	5.13699e+06
FALSE	High	Master Protein	TGGT1_288650-t26_1-p1	transcript=TGGT1_288650-t26_1 | gene=TGGT1_288650 | organism=Toxoplasma_gondii_GT1 | gene_product=Dense granule protein GRA12 [Source:UniProtKB/TrEMBL;Acc:S7VY87] | transcript_product=dense granule protein GRA12 | location=TGGT1_chrIX:2467879-2469672(-) | protein_length=436 | sequence_SO=chromosome | SO=protein_coding_gene | is_pseudo=false	0	78.667	43	14	171	14	436	47.9	9.2	267.79	14	1.568	1.233	0.65	0.3	0.35095	0.365236	0.938934	0.888356	11.56	3.36	0.53	0.8	0.65	0.4	0.27	0.3	1.87688e+07	1.39029e+07	1.17475e+07	14.68	5.01	8.49	1.47825e+07	1.87688e+07	1.96823e+07	1.43133e+07	1.39029e+07	1.29718e+07	9.95427e+06	1.17475e+07	1.25795e+07	1.24731e+07	1.76838e+07	1.7509e+07
FALSE	High	Master Protein	TGGT1_223920-t26_1-p1	transcript=TGGT1_223920-t26_1 | gene=TGGT1_223920 | organism=Toxoplasma_gondii_GT1 | gene_product=Rhoptry neck protein RON3 [Source:UniProtKB/TrEMBL;Acc:S7UWM8] | transcript_product=rhoptry neck protein RON3 | location=TGGT1_chrX:3357300-3367973(+) | protein_length=1958 | sequence_SO=chromosome | SO=protein_coding_gene | is_pseudo=false	0	75.889	16	23	62	23	1958	222.9	9.16	23.02	23	1.492	1.046	0.58	0.06	0.431015	0.640671	0.949873	0.973941	19.6	16.34	0.76	0.58	0.3	0.06	0.22	-0.2	4.86626e+06	3.48154e+06	3.18823e+06	12.69	5.72	5.23	6.01993e+06	4.86626e+06	4.8652e+06	3.34971e+06	3.74606e+06	3.48154e+06	2.77385e+06	3.18823e+06	3.04718e+06	3.38084e+06	4.18052e+06	4.97628e+06
FALSE	High	Master Protein	TGGT1_278490-t26_1-p1	transcript=TGGT1_278490-t26_1 | gene=TGGT1_278490 | organism=Toxoplasma_gondii_GT1 | gene_product=zf-NOSIP domain-containing protein [Source:UniProtKB/TrEMBL;Acc:S7UZM6] | transcript_product=Zn-finger, RING domain containing protein | location=TGGT1_chrXII:5987769-5994159(-) | protein_length=289 | sequence_SO=chromosome | SO=protein_coding_gene | is_pseudo=false	0	73.393	45	10	127	10	289	32.7	9.16	226.45	10	0.997	1.033	0	0.05	0.685305	0.663024	0.971725	0.973941	18.78	16.05	0	0.27	-0.18	-0.12	0.05	0.32	9.44601e+06	9.09195e+06	8.63557e+06	5.42	17.39	5.31	9.50039e+06	9.44601e+06	8.61265e+06	8.41143e+06	9.09195e+06	1.16155e+07	9.96935e+06	9.96056e+06	1.23563e+07	7.66712e+06	8.01531e+06	8.8958e+06
FALSE	High	Master Protein	TGGT1_243920-t26_1-p1	transcript=TGGT1_243920-t26_1 | gene=TGGT1_243920 | organism=Toxoplasma_gondii_GT1 | gene_product=MCM domain-containing protein [Source:UniProtKB/TrEMBL;Acc:A0A125YSK7] | transcript_product=putative DNA replication licensing factor MCM5 | location=TGGT1_chrVI:2796800-2806044(+) | protein_length=794 | sequence_SO=chromosome | SO=protein_coding_gene | is_pseudo=false	0	72.783	28	20	119	20	794	88.2	8.41	87.93	20	1.197	0.912	0.26	-0.13	0.891675	0.919282	0.995562	0.987776	21.89	12.29	0.26	0.46	0	-0.26	-0.13	-0.01	6.83405e+06	4.62616e+06	5.41956e+06	5.3	13.21	2.2	7.10181e+06	6.83405e+06	6.39035e+06	4.44385e+06	4.62616e+06	5.6463e+06	4.70704e+06	5.2331e+06	5.41956e+06	5.45112e+06	5.84772e+06	7.35991e+06
FALSE	High	Master Protein	TGGT1_311470-t26_1-p1	transcript=TGGT1_311470-t26_1 | gene=TGGT1_311470 | organism=Toxoplasma_gondii_GT1 | gene_product=Rhoptry neck protein RON5 [Source:UniProtKB/TrEMBL;Acc:S7W8Q7] | transcript_product=rhoptry neck protein RON5 | location=TGGT1_chrXI:2047692-2067010(-) | protein_length=1699 | sequence_SO=chromosome | SO=protein_coding_gene | is_pseudo=false	0	70.834	17	20	61	20	1699	186.9	8.46	31.39	20	1.109	0.855	0.15	-0.23	0.927458	0.944386	0.995562	0.987776	12.48	14.27	0.15	0.27	-0.17	-0.23	-0.36	-0.08	3.816e+06	2.65682e+06	3.61084e+06	5.85	15.84	5.06	3.89756e+06	3.48536e+06	3.816e+06	2.65682e+06	2.26831e+06	3.11655e+06	3.30124e+06	3.18293e+06	3.76555e+06	3.61084e+06	4.25669e+06	4.89724e+06
FALSE	High	Master Protein	TGGT1_299780-t26_1-p1	transcript=TGGT1_299780-t26_1 | gene=TGGT1_299780 | organism=Toxoplasma_gondii_GT1 | gene_product=hypothetical protein | transcript_product=hypothetical protein | location=TGGT1_chrXII:309236-312184(-) | protein_length=545 | sequence_SO=chromosome | SO=protein_coding_gene | is_pseudo=false	0	70.266	27	12	165	12	545	59.2	9.6	249.15	12	1.62	0.94	0.7	-0.09	0.303013	0.854132	0.911301	0.987776	5.5	11.86	-0.14	0.75	0.7	-0.09	0.03	-0.37	1.68805e+07	1.06586e+07	1.00141e+07	20.04	26.22	26.23	1.35327e+07	1.68805e+07	2.03105e+07	1.29572e+07	1.06586e+07	7.53326e+06	1.21235e+07	9.35035e+06	8.54952e+06	1.5923e+07	1.88417e+07	2.09196e+07
FALSE	High	Master Protein	TGGT1_255320-t26_1-p1	transcript=TGGT1_255320-t26_1 | gene=TGGT1_255320 | organism=Toxoplasma_gondii_GT1 | gene_product=Ribosome assembly factor mrt4 [Source:UniProtKB/TrEMBL;Acc:S7WAU7] | transcript_product=mRNA turnover 4 (MRT4) family protein | location=TGGT1_chrVIIb:4809517-4812021(-) | protein_length=228 | sequence_SO=chromosome | SO=protein_coding_gene | is_pseudo=false	0	70.025	49	10	114	10	228	25.8	9.67	199.63	10	1.157	0.84	0.21	-0.25	0.97173	0.908003	0.995562	0.987776	5.01	31.64	0.16	0.66	0.21	-0.25	-0.53	0.39	1.95797e+07	1.28579e+07	1.35035e+07	14.94	30.61	3.11	1.95797e+07	2.32374e+07	1.73021e+07	1.28579e+07	9.59929e+06	1.77506e+07	1.64821e+07	1.39674e+07	2.20936e+07	1.35035e+07	1.61289e+07	1.32555e+07
FALSE	High	Master Protein	TGGT1_228630-t26_1-p1	transcript=TGGT1_228630-t26_1 | gene=TGGT1_228630 | organism=Toxoplasma_gondii_GT1 | gene_product=hypothetical protein | transcript_product=hypothetical protein | location=TGGT1_chrX:179956-182506(+) | protein_length=328 | sequence_SO=chromosome | SO=protein_coding_gene | is_pseudo=false	0	69.796	43	11	96	11	328	34.7	8.24	145.05	11	0.805	1.274	-0.31	0.35	0.300186	0.320485	0.911301	0.87563	1.5	9.74	-0.06	-0.33	-0.31	0.44	0.35	0.15	1.56255e+07	2.49845e+07	2.20003e+07	20.13	16.13	26.17	2.17737e+07	1.56019e+07	1.56255e+07	2.49845e+07	2.2173e+07	3.03776e+07	3.15877e+07	1.75473e+07	2.94596e+07	2.20003e+07	1.5979e+07	1.91154e+07
FALSE	High	Master Protein	TGGT1_258870B-t26_1-p1	transcript=TGGT1_258870B-t26_1 | gene=TGGT1_258870B | organism=Toxoplasma_gondii_GT1 | gene_product=hypothetical protein | transcript_product=hypothetical protein | location=TGGT1_chrVIIb:3077592-3081353(-) | protein_length=472 | sequence_SO=chromosome | SO=protein_coding_gene | is_pseudo=false	0	69.232	31	11	67	4	472	52.1	10.02	85.4	11	1.182	0.744	0.24	-0.43	0.921301	0.659192	0.995562	0.973941	4.95	3.72	0.19	0.24	0.64	-0.43	0.61	-0.46	1.71568e+06	968356	1.06409e+06	41.92	43.88	25.94	1.71568e+06	1.07597e+06	2.5691e+06	968356	1.77997e+06	809742	1.17428e+06	1.06409e+06	412188	1.37945e+06	1.22777e+06	2.2595e+06
FALSE	High	Master Protein	TGGT1_275802-t26_1-p1	transcript=TGGT1_275802-t26_1 | gene=TGGT1_275802 | organism=Toxoplasma_gondii_GT1 | gene_product=SRP72 domain-containing protein [Source:UniProtKB/TrEMBL;Acc:S7UNG8] | transcript_product=SRP72 RNA-binding domain-containing protein | location=TGGT1_chrIII:207327-214479(-) | protein_length=731 | sequence_SO=chromosome | SO=protein_coding_gene | is_pseudo=false	0	69.23	29	18	52	18	731	79.9	8.24	49.13	18	0.712	0.353	-0.49	-1.5	0.160908	0.0152182	0.665087	0.133325	27.49	11.45	-0.2	-0.49	-0.89	-1.39	-1.61	-1.5	2.80165e+06	1.14556e+06	3.81617e+06	11.07	11.44	23.17	3.03005e+06	2.80165e+06	2.42635e+06	1.38519e+06	1.14556e+06	1.14001e+06	1.94249e+06	1.68834e+06	1.71294e+06	3.52395e+06	3.81617e+06	5.34808e+06
FALSE	High	Master Protein	TGGT1_306920-t26_1-p1	transcript=TGGT1_306920-t26_1 | gene=TGGT1_306920 | organism=Toxoplasma_gondii_GT1 | gene_product=hypothetical protein | transcript_product=hypothetical protein | location=TGGT1_chrXI:162761-166466(-) | protein_length=475 | sequence_SO=chromosome | SO=protein_coding_gene | is_pseudo=false	0	68.66	37	11	48	11	475	49.8	4.64	56.44	11	29.389	48.867	4.88	5.61	1e-17	1e-17	4.24211e-16	2.015e-16	16.82	15.17	4.7	4.88	6.64	5.46	5.61	6.64	6.09984e+06	9.28565e+06	25292.9	18.27	30.14	24.24	4.8022e+06	6.09984e+06	6.96336e+06	9.28565e+06	7.07004e+06	1.2891e+07				30073.2	21272.4
FALSE	High	Master Protein	TGGT1_246600-t26_1-p1	transcript=TGGT1_246600-t26_1 | gene=TGGT1_246600 | organism=Toxoplasma_gondii_GT1 | gene_product=ABC1 family protein [Source:UniProtKB/TrEMBL;Acc:S7V0T4] | transcript_product=ABC1 family protein | location=TGGT1_chrXII:2806257-2812250(+) | protein_length=1900 | sequence_SO=chromosome | SO=protein_coding_gene | is_pseudo=false	0	67.628	11	15	48	15	1900	205.2	7.74	43.63	15	0.898	0.441	-0.16	-1.18	0.475242	0.0667308	0.951523	0.395478	10.2	94.81	-0.16	-0.05	-0.55	-1.18	0.29	-2.04	2.85478e+06	1.50806e+06	3.18625e+06	32.44	42.36	37.28	2.85478e+06	2.0779e+06	3.99771e+06	1.50806e+06	2.25557e+06	932930	1.11437e+06	1.50019e+06	1.0784e+06	3.18625e+06	3.86648e+06	6.49056e+06
FALSE	High	Master Protein	TGGT1_277790-t26_1-p1	transcript=TGGT1_277790-t26_1 | gene=TGGT1_277790 | organism=Toxoplasma_gondii_GT1 | gene_product=Glutaredoxin domain-containing protein [Source:UniProtKB/TrEMBL;Acc:S7UZY4] | transcript_product=hypothetical protein | location=TGGT1_chrXII:6421384-6429987(-) | protein_length=1442 | sequence_SO=chromosome | SO=protein_coding_gene | is_pseudo=false	0	67.295	15	19	83	19	1442	159.1	8.48	76.78	19	1.186	0.627	0.25	-0.67	0.914391	0.371361	0.995562	0.888356	1.36	1.83	0.26	0.25	0.19	-0.69	-0.67	-0.42	7.16861e+06	3.59458e+06	6.66466e+06	9.5	11.08	2.76	7.91875e+06	7.16861e+06	6.54989e+06	3.31017e+06	3.59458e+06	4.11237e+06	4.2083e+06	3.95757e+06	3.9818e+06	6.46747e+06	6.83437e+06	7.28737e+06
FALSE	High	Master Protein	TGGT1_213730-t26_1-p1	transcript=TGGT1_213730-t26_1 | gene=TGGT1_213730 | organism=Toxoplasma_gondii_GT1 | gene_product=Lanthionine synthetase C family protein [Source:UniProtKB/TrEMBL;Acc:S7VX29] | transcript_product=lanthionine synthetase C family protein | location=TGGT1_chrV:1138293-1139567(-) | protein_length=424 | sequence_SO=chromosome | SO=protein_coding_gene | is_pseudo=false	0	66.96	34	12	147	12	424	46.4	8.21	253.66	12	0.934	1.067	-0.1	0.09	0.550495	0.603108	0.956542	0.973941	7.79	33.14	-0.24	-0.02	-0.1	0.09	0.42	-0.27	9.32114e+06	1.18694e+07	1.05046e+07	2.36	24.11	4.55	9.5266e+06	9.32114e+06	9.08799e+06	1.18694e+07	1.2637e+07	7.80498e+06	1.05046e+07	1.0338e+07	8.17853e+06	7.93619e+06	9.87488e+06	1.12524e+07
FALSE	High	Master Protein	TGGT1_218520-t26_1-p1	transcript=TGGT1_218520-t26_1 | gene=TGGT1_218520 | organism=Toxoplasma_gondii_GT1 | gene_product=Microneme protein MIC6 [Source:UniProtKB/TrEMBL;Acc:S7V1D9] | transcript_product=microneme protein MIC6 | location=TGGT1_chrXII:1418869-1419918(-) | protein_length=349 | sequence_SO=chromosome | SO=protein_coding_gene | is_pseudo=false	0	66.765	41	12	128	12	349	36.6	4.69	198.18	12	2.257	1.038	1.17	0.05	0.044356	0.654359	0.325627	0.973941	61.1	38.35	1.17	0.41	1.71	0.39	0.05	-0.83	9.11183e+06	5.53363e+06	5.1074e+06	27.18	50.69	31.41	9.11183e+06	7.75508e+06	1.29659e+07	5.53363e+06	6.0485e+06	1.87759e+06	3.60982e+06	5.81747e+06	2.60324e+06	7.04276e+06	6.64453e+06	8.99196e+06
FALSE	High	Master Protein	TGGT1_215470-t26_1-p1	transcript=TGGT1_215470-t26_1 | gene=TGGT1_215470 | organism=Toxoplasma_gondii_GT1 | gene_product=Ribosomal protein [Source:UniProtKB/TrEMBL;Acc:A0A125YJN6] | transcript_product=ribosomal protein RPL10A | location=TGGT1_chrX:6865357-6867300(+) | protein_length=217 | sequence_SO=chromosome | SO=protein_coding_gene | is_pseudo=false	0	65.908	47	9	137	9	217	24.6	9.88	215.42	9	1.205	0.733	0.27	-0.45	0.876862	0.632047	0.995562	0.973941	24.14	1.38	-0.02	0.49	0.27	-0.46	-0.45	-0.3	1.52881e+07	9.59073e+06	1.39352e+07	8.04	6.69	3.91	1.3446e+07	1.52881e+07	1.5673e+07	1.05292e+07	9.26822e+06	9.59073e+06	1.51659e+07	1.39638e+07	1.41721e+07	1.28485e+07	1.39352e+07	1.48998e+07
FALSE	High	Master Protein	TGGT1_318525-t26_1-p1	transcript=TGGT1_318525-t26_1 | gene=TGGT1_318525 | organism=Toxoplasma_gondii_GT1 | gene_product=hypothetical protein | transcript_product=hypothetical protein | location=TGGT1_chrIV:1192489-1200329(-) | protein_length=1182 | sequence_SO=chromosome | SO=protein_coding_gene | is_pseudo=false	0	64.395	17	14	63	14	1182	127.8	8.22	63.8	14	1.46	0.804	0.55	-0.31	0.46972	0.816742	0.949873	0.987776	30.95	9.67	0.21	0.89	0.55	-0.31	-0.4	0.15	5.05877e+06	2.56966e+06	3.32876e+06	4.59	30.02	23.47	4.76169e+06	5.21446e+06	5.05877e+06	2.56966e+06	1.89517e+06	3.47922e+06	4.51643e+06	2.64801e+06	3.60267e+06	4.2831e+06	4.02194e+06	3.32876e+06
FALSE	High	Master Protein	TGGT1_226580-t26_1-p1	transcript=TGGT1_226580-t26_1 | gene=TGGT1_226580 | organism=Toxoplasma_gondii_GT1 | gene_product=hypothetical protein | transcript_product=hypothetical protein | location=TGGT1_chrX:1431734-1436682(-) | protein_length=380 | sequence_SO=chromosome | SO=protein_coding_gene | is_pseudo=false	0	63.536	42	14	134	14	380	42.7	9.66	150.27	14	0.781	0.716	-0.36	-0.48	0.259915	0.586775	0.851439	0.972191	7.15	5.74	-0.36	-0.42	-0.19	-0.48	-0.43	-0.73	1.02073e+07	8.48385e+06	1.42935e+07	9.28	17.02	3.06	1.05848e+07	8.84192e+06	1.02073e+07	8.48385e+06	9.07182e+06	6.47253e+06	9.32708e+06	1.10843e+07	9.01458e+06	1.57406e+07	1.44674e+07	1.72385e+07
FALSE	High	Master Protein	TGGT1_234610-t26_1-p1	transcript=TGGT1_234610-t26_1 | gene=TGGT1_234610 | organism=Toxoplasma_gondii_GT1 | gene_product=WD_REPEATS_REGION domain-containing protein [Source:UniProtKB/TrEMBL;Acc:S7WBJ5] | transcript_product=WD-40 repeat protein | location=TGGT1_chrX:4387954-4395568(+) | protein_length=702 | sequence_SO=chromosome | SO=protein_coding_gene | is_pseudo=false	0	62.694	26	14	85	14	702	76.4	9.44	76.52	14	0.956	0.777	-0.07	-0.36	0.596425	0.74532	0.971725	0.976829	2	0.77	-0.08	0.66	-0.07	-0.36	-0.37	0.07	5.8201e+06	4.06452e+06	4.97378e+06	21.18	20.83	6.14	5.8201e+06	7.25365e+06	4.74558e+06	4.06452e+06	3.81016e+06	5.53473e+06	5.40221e+06	4.28516e+06	4.97378e+06	4.96055e+06	4.68043e+06	5.46335e+06
FALSE	High	Master Protein	TGGT1_235750-t26_1-p1	transcript=TGGT1_235750-t26_1 | gene=TGGT1_235750 | organism=Toxoplasma_gondii_GT1 | gene_product=Protein kinase domain-containing protein [Source:UniProtKB/TrEMBL;Acc:S7UQN9] | transcript_product=ULK kinase | location=TGGT1_chrX:4980554-4985413(+) | protein_length=363 | sequence_SO=chromosome | SO=protein_coding_gene | is_pseudo=false	0	62.373	40	13	93	13	363	41.2	8.65	73.83	13	1.048	0.815	0.07	-0.3	0.797598	0.843815	0.995562	0.987776	24.07	1.5	-0.61	0.29	0.07	-0.38	-0.28	-0.3	6.8913e+06	5.29906e+06	7.3824e+06	15.07	3.15	9.66	5.94405e+06	8.03837e+06	6.8913e+06	5.58664e+06	5.29906e+06	5.28583e+06	6.75702e+06	6.14203e+06	6.2544e+06	7.47616e+06	7.96236e+06	8.10563e+06
FALSE	High	Master Protein	TGGT1_227850-t26_1-p1	transcript=TGGT1_227850-t26_1 | gene=TGGT1_227850 | organism=Toxoplasma_gondii_GT1 | gene_product=Peptidyl-prolyl cis-trans isomerase [Source:UniProtKB/TrEMBL;Acc:S7UXC3] | transcript_product=peptidyl-prolyl cis-trans isomerase, cyclophilin-type domain-containing protein | location=TGGT1_chrX:681324-685057(-) | protein_length=592 | sequence_SO=chromosome | SO=protein_coding_gene | is_pseudo=false	0	61.614	30	15	95	15	592	66.2	8.18	89.71	15	0.926	0.838	-0.11	-0.25	0.533676	0.902517	0.953376	0.987776	18.92	15.52	-0.28	0.46	-0.11	-0.4	-0.25	0	6.31975e+06	5.58832e+06	6.44602e+06	24.03	14.17	10.95	4.92771e+06	8.00723e+06	6.31975e+06	5.58832e+06	4.5864e+06	6.09661e+06	8.5295e+06	5.69215e+06	7.68788e+06	6.44602e+06	5.39569e+06	7.09497e+06
FALSE	High	Master Protein	TGGT1_253520-t26_1-p1	transcript=TGGT1_253520-t26_1 | gene=TGGT1_253520 | organism=Toxoplasma_gondii_GT1 | gene_product=U3 small nucleolar RNA-associated protein 6 protein [Source:UniProtKB/TrEMBL;Acc:S7UMT3] | transcript_product=U3 small nucleolar RNA-associated protein 6 protein | location=TGGT1_chrIII:990022-993852(-) | protein_length=1276 | sequence_SO=chromosome | SO=protein_coding_gene | is_pseudo=false	0	61.259	14	17	95	17	1276	140.5	7.91	87.52	17	1.159	1.37	0.21	0.45	0.968227	0.235605	0.995562	0.787957	10.56	17.62	0.21	0.44	0.11	0.45	0.27	0.76	6.38104e+06	5.73121e+06	4.22144e+06	17.53	19.81	7.37	6.5048e+06	6.38104e+06	4.66922e+06	5.42396e+06	5.73121e+06	7.71995e+06	5.87887e+06	6.69807e+06	6.78547e+06	3.82915e+06	4.22144e+06	4.43358e+06
FALSE	High	Master Protein	TGGT1_262070-t26_1-p1	transcript=TGGT1_262070-t26_1 | gene=TGGT1_262070 | organism=Toxoplasma_gondii_GT1 | gene_product=KRR1 small subunit processome component [Source:UniProtKB/TrEMBL;Acc:A0A125YI23] | transcript_product=putative ribosomal rna assembly protein mis3 | location=TGGT1_chrVIIb:1365066-1371076(-) | protein_length=394 | sequence_SO=chromosome | SO=protein_coding_gene | is_pseudo=false	0	59.467	40	13	73	13	394	45.1	9.67	62.78	13	0.963	0.213	-0.05	-2.23	0.612307	0.000164385	0.971725	0.00245359	22.28	4.6	-0.85	0.18	-0.05	-2.23	-2.27	-1.32	4.99481e+06	1.65209e+06	8.17181e+06	32.24	17.67	16.01	4.7779e+06	8.23301e+06	4.99481e+06	1.65209e+06	1.26096e+06	1.79726e+06	3.31144e+06	2.27023e+06	3.04436e+06	8.17181e+06	8.51625e+06	1.18528e+07
FALSE	High	Master Protein	TGGT1_208830-t26_1-p1	transcript=TGGT1_208830-t26_1 | gene=TGGT1_208830 | organism=Toxoplasma_gondii_GT1 | gene_product=hypothetical protein | transcript_product=hypothetical protein | location=TGGT1_chrIb:904648-906165(-) | protein_length=505 | sequence_SO=chromosome | SO=protein_coding_gene | is_pseudo=false	0	59.451	25	12	137	12	505	54.9	9.95	184.93	12	1.358	1.186	0.44	0.25	0.611079	0.421621	0.971725	0.920068	15.32	0.2	0.28	0.78	0.44	0.25	0.25	-0.19	2.11921e+07	1.42982e+07	1.26544e+07	14.09	18.05	7.12	1.85509e+07	2.45789e+07	2.11921e+07	1.42982e+07	1.56582e+07	1.08878e+07	1.26544e+07	1.38016e+07	1.1998e+07	1.29867e+07	1.38803e+07	1.5957e+07
FALSE	High	Master Protein	TGGT1_259830-t26_1-p1	transcript=TGGT1_259830-t26_1 | gene=TGGT1_259830 | organism=Toxoplasma_gondii_GT1 | gene_product=DAGKc domain-containing protein [Source:UniProtKB/TrEMBL;Acc:S7UYJ8] | transcript_product=diacylglycerol kinase catalytic domain-containing protein | location=TGGT1_chrVIIb:2657001-2661219(+) | protein_length=628 | sequence_SO=chromosome | SO=protein_coding_gene | is_pseudo=false	0	59.136	27	15	97	15	628	69.5	9.67	87.79	15	1.438	1.076	0.52	0.11	0.498325	0.586229	0.951523	0.972191	13.31	3.16	-0.1	0.52	0.65	0.14	0.11	-0.47	1.00861e+07	7.34364e+06	6.73258e+06	9.91	34.49	20.93	8.52146e+06	1.02454e+07	1.00861e+07	8.47772e+06	7.34364e+06	4.07266e+06	6.61328e+06	6.73258e+06	5.3633e+06	9.90457e+06	9.55931e+06	1.05424e+07
FALSE	High	Master Protein	TGGT1_269885A-t26_1-p1	transcript=TGGT1_269885A-t26_1 | gene=TGGT1_269885A | organism=Toxoplasma_gondii_GT1 | gene_product=Rhoptry metalloprotease toxolysin TLN1 [Source:UniProtKB/TrEMBL;Acc:S7V3X7] | transcript_product=rhoptry metalloprotease toxolysin TLN1 | location=TGGT1_chrVIII:5561686-5568242(+) | protein_length=1291 | sequence_SO=chromosome | SO=protein_coding_gene | is_pseudo=false	0	58.9	17	14	37	14	1291	142.2	6.92	24.45	14	1.784	1.488	0.83	0.57	0.188628	0.159626	0.734464	0.657139	2.04	2.7	0.83	0.88	0.81	0.96	0.55	0.57	2.64285e+06	2.3089e+06	1.39195e+06	10.38	5.98	11.29	2.46831e+06	3.0187e+06	2.64285e+06	2.55187e+06	2.30085e+06	2.3089e+06	1.69858e+06	2.02615e+06	1.89788e+06	1.25509e+06	1.39195e+06	1.57155e+06
FALSE	High	Master Protein	TGGT1_410370-t26_1-p1	transcript=TGGT1_410370-t26_1 | gene=TGGT1_410370 | organism=Toxoplasma_gondii_GT1 | gene_product=Putative transmembrane protein [Source:UniProtKB/TrEMBL;Acc:S7VU98] | transcript_product=putative transmembrane protein | location=AAQM03000265:733-2584(+) | protein_length=435 | sequence_SO=contig | SO=protein_coding_gene | is_pseudo=false	0	58.316	37	12	139	2	435	47.7	9.19	227.41	12	0.961	1.149	-0.06	0.2	0.606717	0.472632	0.971725	0.927945	11.35	12.73	-0.35	-0.06	0.06	0.2	0.32	-0.88	642938	775255	715653	20.89	39.01	8.51	526960	642938	800302	775255	861211	372003	583979	715653	405726	782950	751931	1.0018e+06
FALSE	High	Master Protein	TGGT1_245610-t26_1-p1	transcript=TGGT1_245610-t26_1 | gene=TGGT1_245610 | organism=Toxoplasma_gondii_GT1 | gene_product=hypothetical protein | transcript_product=hypothetical protein | location=TGGT1_chrXII:2358915-2369554(+) | protein_length=615 | sequence_SO=chromosome | SO=protein_coding_gene | is_pseudo=false	0	57.025	23	10	96	10	615	68.2	9.1	103.69	10	1.225	1.004	0.29	0.01	0.838708	0.718977	0.995562	0.973941	5.81	25.21	0.29	0.35	-0.17	0.01	0.46	-0.26	4.62929e+06	4.0667e+06	3.82505e+06	8.77	15.47	21.42	4.94913e+06	4.62929e+06	4.15178e+06	3.82216e+06	5.08342e+06	4.0667e+06	3.44805e+06	3.82505e+06	3.49659e+06	3.54688e+06	4.09595e+06	5.23859e+06
FALSE	High	Master Protein	TGGT1_258800-t26_1-p1	transcript=TGGT1_258800-t26_1 | gene=TGGT1_258800 | organism=Toxoplasma_gondii_GT1 | gene_product=Protein kinase domain-containing protein [Source:UniProtKB/TrEMBL;Acc:S7UZ99] | transcript_product=rhoptry kinase family protein ROP31 | location=TGGT1_chrVIIb:3142724-3144319(+) | protein_length=531 | sequence_SO=chromosome | SO=protein_coding_gene | is_pseudo=false	0	56.558	34	13	62	13	531	59.1	9.26	44.86	13	1.28	1.113	0.36	0.15	0.739137	0.527124	0.981806	0.960964	13.67	3.2	0.01	0.48	0.36	0.18	0.02	0.15	4.64303e+06	3.45285e+06	3.41352e+06	9.81	1.96	4	4.14312e+06	5.04626e+06	4.64303e+06	3.52199e+06	3.45285e+06	3.38653e+06	4.18983e+06	3.19146e+06	3.43219e+06	3.4121e+06	3.77854e+06	4.39432e+06
FALSE	High	Master Protein	TGGT1_274050-t26_1-p1	transcript=TGGT1_274050-t26_1 | gene=TGGT1_274050 | organism=Toxoplasma_gondii_GT1 | gene_product=hypothetical protein | transcript_product=hypothetical protein | location=TGGT1_chrVIII:3049359-3052978(+) | protein_length=304 | sequence_SO=chromosome | SO=protein_coding_gene | is_pseudo=false	0	56.071	46	11	103	11	304	34.8	9.31	115.24	11	1.302	1.228	0.38	0.3	0.701714	0.370134	0.971725	0.888356	12.4	9.89	0.07	0.5	0.38	0.2	0.47	0.3	6.19748e+06	6.01003e+06	5.44307e+06	17.45	6.09	4.78	6.19748e+06	5.61688e+06	7.8207e+06	6.20479e+06	6.01003e+06	5.50712e+06	5.80439e+06	4.73583e+06	4.93815e+06	5.44307e+06	5.78528e+06	5.80428e+06
FALSE	High	Master Protein	TGGT1_242330-t26_1-p1	transcript=TGGT1_242330-t26_1 | gene=TGGT1_242330 | organism=Toxoplasma_gondii_GT1 | gene_product=Ribosomal_S7 domain-containing protein [Source:UniProtKB/TrEMBL;Acc:A0A125YNF8] | transcript_product=ribosomal protein RPS5 | location=TGGT1_chrVI:1882939-1884008(-) | protein_length=192 | sequence_SO=chromosome | SO=protein_coding_gene | is_pseudo=false	0	55.714	64	10	119	10	192	21.6	9.74	209.4	10	1.063	1.3	0.09	0.38	0.830473	0.29524	0.995562	0.84086	9.35	17.49	-0.01	0.33	0.09	0.38	0.2	0.64	1.04349e+07	1.26557e+07	1.03421e+07	2.92	14.89	6	1.04349e+07	1.02718e+07	1.08669e+07	1.26557e+07	1.05667e+07	1.42783e+07	1.26936e+07	1.16014e+07	1.38507e+07	9.41528e+06	9.2347e+06	1.03421e+07
FALSE	High	Master Protein	TGGT1_282055-t26_1-p1	transcript=TGGT1_282055-t26_1 | gene=TGGT1_282055 | organism=Toxoplasma_gondii_GT1 | gene_product=PPM-type phosphatase domain-containing protein [Source:UniProtKB/TrEMBL;Acc:S7UW79] | transcript_product=protein phosphatase PP2C-hn | location=TGGT1_chrVIIa:4262456-4267234(-) | protein_length=478 | sequence_SO=chromosome | SO=protein_coding_gene | is_pseudo=false	0	55.51	37	12	98	12	478	51.9	8.68	85.54	12	1.367	0.798	0.45	-0.33	0.597315	0.800239	0.971725	0.987776	2.43	18.27	0.47	0.45	0.28	-0.33	0.24	-0.49	1.11015e+07	5.68831e+06	9.21461e+06	17.92	25.93	10.82	1.24615e+07	8.66256e+06	1.11015e+07	5.68831e+06	6.77814e+06	3.96206e+06	3.86688e+06	5.00735e+06	3.75176e+06	9.10925e+06	9.27551e+06	1.09901e+07
FALSE	High	Master Protein	TGGT1_252500-t26_1-p1	transcript=TGGT1_252500-t26_1 | gene=TGGT1_252500 | organism=Toxoplasma_gondii_GT1 | gene_product=Protein kinase domain-containing protein [Source:UniProtKB/TrEMBL;Acc:S7VW49] | transcript_product=polo kinase | location=TGGT1_chrIII:579006-581099(-) | protein_length=697 | sequence_SO=chromosome | SO=protein_coding_gene | is_pseudo=false	0	54.962	21	11	77	11	697	76.9	10.58	103.22	11	1.165	0.853	0.22	-0.23	0.955506	0.939844	0.995562	0.987776	5.89	5.12	-0.28	0.28	0.22	-0.18	-0.43	-0.23	6.09526e+06	4.35732e+06	6.18492e+06	7.19	16.11	14.99	5.50067e+06	6.09526e+06	6.3358e+06	4.77799e+06	3.45476e+06	4.35732e+06	5.23438e+06	4.0977e+06	4.83705e+06	6.62665e+06	6.18492e+06	7.47058e+06
FALSE	High	Master Protein	TGGT1_356400-t26_1-p1	transcript=TGGT1_356400-t26_1 | gene=TGGT1_356400 | organism=Toxoplasma_gondii_GT1 | gene_product=cAMP-dependent protein kinase [Source:UniProtKB/TrEMBL;Acc:S7VUD2] | transcript_product=cAMP-dependent protein kinase | location=AAQM03000497:1-917(-) | protein_length=306 | sequence_SO=contig | SO=protein_coding_gene | is_pseudo=false	0	54.46	49	7	141	5	306	32	5.27	231.86	7	0.416	0.69	-1.27	-0.53	0.00280382	0.52215	0.0409737	0.960964	18.66	34.26	-1.06	-1.27	-1.44	-0.16	-0.53	-2.53	3.92504e+06	5.00616e+06	8.05047e+06	16.07	54.92	30.19	3.92504e+06	2.99876e+06	4.09572e+06	5.33175e+06	5.00616e+06	1.44366e+06	4.73353e+06	4.55061e+06	2.83397e+06	6.81248e+06	8.05047e+06	1.19862e+07
FALSE	High	Master Protein	TGGT1_232050-t26_1-p1	transcript=TGGT1_232050-t26_1 | gene=TGGT1_232050 | organism=Toxoplasma_gondii_GT1 | gene_product=J domain-containing protein [Source:UniProtKB/TrEMBL;Acc:S7V2Q7] | transcript_product=DnaJ domain-containing protein | location=TGGT1_chrVIII:1780837-1792241(-) | protein_length=869 | sequence_SO=chromosome | SO=protein_coding_gene | is_pseudo=false	0	54.034	20	12	51	12	869	96.1	6.52	48.56	12	1.266	0.964	0.34	-0.05	0.762504	0.801995	0.995562	0.987776	29.64	1.32	0.69	0.34	0.02	-0.05	-0.04	-0.42	2.11766e+06	1.4228e+06	1.46636e+06	19.98	13.58	2.04	2.63765e+06	1.77379e+06	2.11766e+06	1.4228e+06	1.56557e+06	1.1907e+06	1.1358e+06	1.44641e+06	1.11136e+06	1.46636e+06	1.90581e+06	3.23897e+06
FALSE	High	Master Protein	TGGT1_288840-t26_1-p1	transcript=TGGT1_288840-t26_1 | gene=TGGT1_288840 | organism=Toxoplasma_gondii_GT1 | gene_product=hypothetical protein | transcript_product=hypothetical protein | location=TGGT1_chrIX:2574137-2576083(+) | protein_length=648 | sequence_SO=chromosome | SO=protein_coding_gene | is_pseudo=false	0	53.895	20	14	130	14	648	70.8	9.13	115.63	14	0.994	1.04	-0.01	0.06	0.679202	0.650876	0.971725	0.973941	4.71	15.23	-0.29	0.04	-0.01	0.06	0.2	-0.45	1.14917e+07	1.22779e+07	1.18029e+07	6.01	35.16	15.37	1.05203e+07	1.14917e+07	1.18251e+07	1.39135e+07	1.22779e+07	6.59283e+06	1.19745e+07	1.18029e+07	8.98494e+06	1.13243e+07	1.25673e+07	1.35889e+07
FALSE	High	Master Protein	TGGT1_312270-t26_1-p1	transcript=TGGT1_312270-t26_1 | gene=TGGT1_312270 | organism=Toxoplasma_gondii_GT1 | gene_product=Rhoptry protein ROP13 [Source:UniProtKB/TrEMBL;Acc:A0A125YQ57] | transcript_product=rhoptry protein ROP13 | location=TGGT1_chrXI:2519556-2520758(-) | protein_length=400 | sequence_SO=chromosome | SO=protein_coding_gene | is_pseudo=false	0	53.77	38	11	114	11	400	44.7	9.22	183.77	11	1.163	1.217	0.22	0.28	0.959585	0.383531	0.995562	0.895497	6.06	2.09	0.22	0.28	0.16	0.28	0.3	0.06	1.96909e+07	1.48959e+07	1.28842e+07	4.97	13.21	4.94	2.09903e+07	1.96909e+07	1.90471e+07	1.62629e+07	1.48959e+07	1.24685e+07	1.38222e+07	1.25805e+07	1.28842e+07	1.39107e+07	1.62311e+07	1.57386e+07
FALSE	High	Master Protein	TGGT1_209580-t26_1-p1	transcript=TGGT1_209580-t26_1 | gene=TGGT1_209580 | organism=Toxoplasma_gondii_GT1 | gene_product=UPF0020 domain-containing protein [Source:UniProtKB/TrEMBL;Acc:S7UJF5] | transcript_product=RNA methylase family UPF0020 protein | location=TGGT1_chrIb:1362191-1366942(+) | protein_length=784 | sequence_SO=chromosome | SO=protein_coding_gene | is_pseudo=false	0	53.457	22	13	47	13	784	85.7	9.61	49.44	13	1.34	0.847	0.42	-0.24	0.638559	0.924416	0.971725	0.987776	14.99	0.91	0.27	0.63	0.42	-0.25	-0.24	0.15	4.85791e+06	2.6989e+06	2.83319e+06	8.29	20.33	5.33	4.85791e+06	5.38803e+06	4.58218e+06	2.6989e+06	2.58422e+06	3.68982e+06	2.94774e+06	2.71281e+06	3.01472e+06	2.83319e+06	3.19915e+06	3.83078e+06
FALSE	High	Master Protein	TGGT1_288360-t26_1-p1	transcript=TGGT1_288360-t26_1 | gene=TGGT1_288360 | organism=Toxoplasma_gondii_GT1 | gene_product=Tryptophanyl-tRNA synthetase (TrpRS2) [Source:UniProtKB/TrEMBL;Acc:A0A125YPX8] | transcript_product=tryptophanyl-tRNA synthetase (TrpRS2) | location=TGGT1_chrIX:2284649-2289081(+) | protein_length=689 | sequence_SO=chromosome | SO=protein_coding_gene | is_pseudo=false	0	52.744	26	13	42	13	689	77	7.3	34.51	13	1.25	0.628	0.32	-0.67	0.791731	0.372068	0.995562	0.888356	0.63	20.08	0.47	0.32	0.32	-0.67	-0.46	-1.02	2.25426e+06	1.12949e+06	2.20114e+06	31.94	5.6	25.92	2.25426e+06	2.00588e+06	3.55501e+06	1.04583e+06	1.12949e+06	1.16797e+06	1.30065e+06	1.44444e+06	2.84493e+06	1.68414e+06	2.20114e+06	2.76031e+06
FALSE	High	Master Protein	TGGT1_263150-t26_1-p1	transcript=TGGT1_263150-t26_1 | gene=TGGT1_263150 | organism=Toxoplasma_gondii_GT1 | gene_product=TPR_REGION domain-containing protein [Source:UniProtKB/TrEMBL;Acc:A0A125YNK4] | transcript_product=tetratricopeptide repeat-containing protein | location=TGGT1_chrVIIb:731892-735864(+) | protein_length=414 | sequence_SO=chromosome | SO=protein_coding_gene | is_pseudo=false	0	51.345	48	12	48	12	414	45.3	4.81	58.11	12	0.749	0.493	-0.42	-1.02	0.211782	0.124756	0.786618	0.590572	37.93	0.11	-0.99	0.01	-0.42	-1.14	-1.02	-1.02	2.69136e+06	1.42754e+06	2.77046e+06	32.76	13.37	15.06	2.69136e+06	3.74797e+06	1.92834e+06	1.42754e+06	1.49126e+06	1.15019e+06	1.78234e+06	2.07052e+06	1.45475e+06	2.77046e+06	2.67069e+06	3.97433e+06
FALSE	High	Master Protein	TGGT1_271360-t26_1-p1	transcript=TGGT1_271360-t26_1 | gene=TGGT1_271360 | organism=Toxoplasma_gondii_GT1 | gene_product=hypothetical protein | transcript_product=hypothetical protein | location=TGGT1_chrVIII:4543139-4545539(+) | protein_length=464 | sequence_SO=chromosome | SO=protein_coding_gene | is_pseudo=false	0	50.232	33	13	86	13	464	50.4	10.07	108.97	13	0.795	0.573	-0.33	-0.8	0.283591	0.255571	0.885993	0.812006	25.84	14.06	-0.56	-0.02	-0.33	-0.8	-0.93	-0.63	7.30959e+06	5.1457e+06	1.06469e+07	9.07	10.71	10.75	6.82474e+06	8.15623e+06	7.30959e+06	5.4738e+06	4.42425e+06	5.1457e+06	8.54652e+06	6.59554e+06	7.94013e+06	1.06469e+07	8.80718e+06	1.07089e+07
FALSE	High	Master Protein	TGGT1_260190-t26_1-p1	transcript=TGGT1_260190-t26_1 | gene=TGGT1_260190 | organism=Toxoplasma_gondii_GT1 | gene_product=Microneme protein MIC13 [Source:UniProtKB/TrEMBL;Acc:S7UYL3] | transcript_product=microneme protein MIC13 | location=TGGT1_chrVIIb:2444928-2447434(+) | protein_length=468 | sequence_SO=chromosome | SO=protein_coding_gene | is_pseudo=false	0	48.995	28	9	41	9	468	51.4	6.33	40.54	9	3.189	0.858	1.67	-0.22	0.0024297	0.952398	0.0362655	0.987776	64.92	3.46	0.84	1.67	2.54	-0.22	-0.19	-1.33	9.15121e+06	2.51189e+06	2.2958e+06	15.25	61.33	68.88	7.78046e+06	1.05774e+07	9.15121e+06	2.51189e+06	2.55891e+06	546764	1.59662e+06	2.2958e+06	670499	4.25923e+06	4.64886e+06	5.6726e+06
FALSE	High	Master Protein	TGGT1_311430-t26_1-p1	transcript=TGGT1_311430-t26_1 | gene=TGGT1_311430 | organism=Toxoplasma_gondii_GT1 | gene_product=Fibrillarin [Source:UniProtKB/TrEMBL;Acc:S7UTZ7] | transcript_product=fibrillarin | location=TGGT1_chrXI:2031325-2032910(-) | protein_length=303 | sequence_SO=chromosome | SO=protein_coding_gene | is_pseudo=false	0	48.603	35	9	73	9	303	31.9	10.29	99.03	9	0.892	0.34	-0.16	-1.55	0.463243	0.0116313	0.949873	0.106532	6.28	6.97	-0.22	0.14	-0.16	-1.55	-1.48	-1.73	4.98977e+06	1.81662e+06	6.09103e+06	1.25	16.29	5.56	4.96321e+06	4.98977e+06	5.08265e+06	1.84653e+06	1.81662e+06	1.35984e+06	2.36551e+06	2.04472e+06	1.66613e+06	6.66496e+06	6.03613e+06	7.12458e+06
FALSE	High	Master Protein	TGGT1_262400-t26_1-p1	transcript=TGGT1_262400-t26_1 | gene=TGGT1_262400 | organism=Toxoplasma_gondii_GT1 | gene_product=Lipase_3 domain-containing protein [Source:UniProtKB/TrEMBL;Acc:S7WDX0] | transcript_product=lipase | location=TGGT1_chrVIIb:1267118-1275076(-) | protein_length=1409 | sequence_SO=chromosome | SO=protein_coding_gene | is_pseudo=false	0	48.571	14	15	60	15	1409	155.7	8.54	49.53	15	0.933	1.614	-0.1	0.69	0.547015	0.104551	0.956387	0.546318	13.03	29.88	0.28	-0.22	-0.1	0.96	0.69	-0.29	2.50712e+06	6.05061e+06	3.24994e+06	26.81	45.13	12.66	3.83281e+06	2.50712e+06	2.44202e+06	6.38515e+06	6.05061e+06	2.37114e+06	3.42514e+06	4.95613e+06	3.12856e+06	2.6435e+06	3.37437e+06	3.904e+06
FALSE	High	Master Protein	TGGT1_288500-t26_1-p1	transcript=TGGT1_288500-t26_1 | gene=TGGT1_288500 | organism=Toxoplasma_gondii_GT1 | gene_product=FAD Malate-dehydrogenase (MDH-FAD) [Source:UniProtKB/TrEMBL;Acc:S7VY67] | transcript_product=FAD Malate-dehydrogenase (MDH-FAD) | location=TGGT1_chrIX:2391742-2395938(-) | protein_length=550 | sequence_SO=chromosome | SO=protein_coding_gene | is_pseudo=false	0	47.584	25	12	66	12	550	60.3	9.22	56.67	12	1.464	0.899	0.55	-0.15	0.464359	0.949784	0.949873	0.987776	10.2	10.11	0.26	0.65	0.55	-0.25	-0.15	-0.05	7.02734e+06	4.26538e+06	5.15518e+06	7.11	10.17	13.91	6.4117e+06	7.02734e+06	7.3884e+06	4.26538e+06	3.72042e+06	4.55845e+06	4.19588e+06	3.75289e+06	4.53612e+06	5.98507e+06	6.74007e+06	6.22342e+06
FALSE	High	Master Protein	TGGT1_279100-t26_1-p1	transcript=TGGT1_279100-t26_1 | gene=TGGT1_279100 | organism=Toxoplasma_gondii_GT1 | gene_product=hypothetical protein | transcript_product=hypothetical protein | location=AAQM03000427:32-1883(+) | protein_length=435 | sequence_SO=contig | SO=protein_coding_gene | is_pseudo=false	0	47.382	28	9	104	1	435	48	7.5	193.72	9	0.856	1.353	-0.23	0.44	0.391332	0.24831	0.949873	0.800552	3.61	18.15	-0.26	0.49	-0.23	0.44	0.6	-0.52	142739	186692	140524	27.68	29.03	10.77	115211	197801	142739	186692	213471	116631	114590	140524	116000	137944	187135	200979
FALSE	High	Master Protein	TGGT1_275860-t26_1-p1	transcript=TGGT1_275860-t26_1 | gene=TGGT1_275860 | organism=Toxoplasma_gondii_GT1 | gene_product=hypothetical protein | transcript_product=hypothetical protein | location=TGGT1_chrIII:168447-170625(+) | protein_length=383 | sequence_SO=chromosome | SO=protein_coding_gene | is_pseudo=false	0	47.122	32	8	59	8	383	43.2	9.09	70.23	8	1.129	1.185	0.18	0.24	0.970489	0.423505	0.995562	0.920068	12.94	32.68	0.18	0.04	0.69	0.53	0.24	-0.31	6.22599e+06	5.62486e+06	3.99356e+06	14.02	32.36	28.7	6.92564e+06	6.22599e+06	5.21798e+06	5.62486e+06	6.54889e+06	3.3073e+06	3.99356e+06	5.9376e+06	2.96179e+06	5.14199e+06	5.3013e+06	6.58565e+06
FALSE	High	Master Protein	TGGT1_225150-t26_1-p1	transcript=TGGT1_225150-t26_1 | gene=TGGT1_225150 | organism=Toxoplasma_gondii_GT1 | gene_product=hypothetical protein | transcript_product=hypothetical protein | location=TGGT1_chrX:2357556-2361015(+) | protein_length=691 | sequence_SO=chromosome | SO=protein_coding_gene | is_pseudo=false	0	46.732	17	11	100	11	691	76.8	9.47	141.6	11	2.116	1.588	1.08	0.67	0.0688865	0.114139	0.420625	0.563258	14.34	19.17	1.08	0.9	1.21	0.84	0.67	0.29	1.08777e+07	9.09327e+06	5.86362e+06	9.22	28.26	12.16	1.17193e+07	9.73887e+06	1.08777e+07	1.04431e+07	9.09327e+06	5.80241e+06	5.86362e+06	6.06637e+06	5.01813e+06	8.00253e+06	6.4681e+06	4.80323e+06
FALSE	High	Master Protein	TGGT1_306000-t26_1-p1	transcript=TGGT1_306000-t26_1 | gene=TGGT1_306000 | organism=Toxoplasma_gondii_GT1 | gene_product=AP2 domain transcription factor AP2IX-8 [Source:UniProtKB/TrEMBL;Acc:S7VQV0] | transcript_product=AP2 domain transcription factor AP2IX-8 | location=TGGT1_chrIX:5495092-5500645(+) | protein_length=1757 | sequence_SO=chromosome | SO=protein_coding_gene | is_pseudo=false	0	46.721	9	10	49	10	1757	176.9	7.14	40.65	10	0.894	0.902	-0.16	-0.15	0.467753	0.942582	0.949873	0.987776	15.68	15.38	-0.16	0.01	-0.31	-0.15	0.12	-0.29	2.18666e+06	2.22302e+06	2.40035e+06	2.62	10.23	4.86	2.18666e+06	2.10373e+06	2.21242e+06	2.22302e+06	2.53156e+06	2.07502e+06	2.0808e+06	2.57525e+06	2.35583e+06	2.41726e+06	2.21218e+06	3.02841e+06
FALSE	High	Master Protein	TGGT1_279330-t26_1-p1	transcript=TGGT1_279330-t26_1 | gene=TGGT1_279330 | organism=Toxoplasma_gondii_GT1 | gene_product=DEAD/DEAH box helicase family protein [Source:UniProtKB/TrEMBL;Acc:A0A125YGI8] | transcript_product=DEAD/DEAH box helicase family protein | location=TGGT1_chrIX:91625-95960(+) | protein_length=479 | sequence_SO=chromosome | SO=protein_coding_gene | is_pseudo=false	0	46.61	25	9	62	9	479	51.7	9.64	81.68	9	0.887	0.776	-0.17	-0.37	0.452424	0.743926	0.949873	0.976829	9.48	5.37	0.35	-0.17	-0.26	-0.37	-0.19	-0.42	2.03579e+06	1.54836e+06	2.61336e+06	34.7	20.21	7.96	3.48701e+06	1.9483e+06	2.03579e+06	1.21418e+06	1.83265e+06	1.54836e+06	1.09151e+06	2.29471e+06	2.41667e+06	2.91576e+06	2.97953e+06	3.04354e+06
FALSE	High	Master Protein	TGGT1_208560-t26_1-p1	transcript=TGGT1_208560-t26_1 | gene=TGGT1_208560 | organism=Toxoplasma_gondii_GT1 | gene_product=Carrier superfamily protein [Source:UniProtKB/TrEMBL;Acc:A0A125YPP8] | transcript_product=carrier superfamily protein | location=TGGT1_chrIb:794791-800321(-) | protein_length=670 | sequence_SO=chromosome | SO=protein_coding_gene | is_pseudo=false	0	46.135	22	13	59	13	670	72.3	9.69	24.64	13	0.749	1.465	-0.42	0.55	0.211749	0.172096	0.786618	0.679947	8.77	26.71	-0.69	-0.42	-0.33	0.79	0.55	-0.26	2.25412e+06	4.28279e+06	2.92896e+06	19.38	28.65	9.93	1.67018e+06	2.25412e+06	2.46811e+06	5.06313e+06	4.28279e+06	2.78392e+06	3.35652e+06	4.67865e+06	4.07212e+06	2.43243e+06	2.49197e+06	2.69824e+06
FALSE	High	Master Protein	TGGT1_261250-t26_1-p1	transcript=TGGT1_261250-t26_1 | gene=TGGT1_261250 | organism=Toxoplasma_gondii_GT1 | gene_product=Histone H2A [Source:UniProtKB/TrEMBL;Acc:S7UYT4] | transcript_product=histone H2A1 | location=TGGT1_chrVIIb:1779724-1780266(-) | protein_length=180 | sequence_SO=chromosome | SO=protein_coding_gene | is_pseudo=false	0	45.72	38	4	75	2	180	19.5	10.2	171.21	4	1.771	0.482	0.82	-1.05	0.196056	0.110646	0.756082	0.55668	0.32	19.31	0.02	0.82	0.83	-2.22	-1.05	-0.85	1.87897e+07	4.48632e+06	9.24248e+06	30.85	29.35	14.37	2.30116e+07	1.87897e+07	1.20365e+07	2.83738e+06	4.48632e+06	5.24103e+06	5.40434e+06	4.68136e+06	3.11068e+06	1.02267e+07	1.13158e+07	1.81433e+07
FALSE	High	Master Protein	TGGT1_311720-t26_1-p1	transcript=TGGT1_311720-t26_1 | gene=TGGT1_311720 | organism=Toxoplasma_gondii_GT1 | gene_product=Chaperonin protein BiP [Source:UniProtKB/TrEMBL;Acc:A0A125YJG4] | transcript_product=chaperonin protein BiP | location=TGGT1_chrXI:2188121-2191497(-) | protein_length=668 | sequence_SO=chromosome | SO=protein_coding_gene | is_pseudo=false	0	45.519	23	11	36	11	668	73.2	5.38	24.7	11	1.793	0.851	0.84	-0.23	0.183652	0.935494	0.718562	0.987776	11.3	9.04	0.73	1.13	0.84	-0.32	-0.12	-0.23	4.4242e+06	2.19738e+06	2.47285e+06	22.52	47.8	20.2	3.23455e+06	4.4242e+06	5.13591e+06	1.00715e+06	2.19738e+06	2.95364e+06	1.42131e+06	2.1909e+06	3.6067e+06	2.16245e+06	2.76295e+06	3.18991e+06
FALSE	High	Master Protein	TGGT1_208790-t26_1-p1	transcript=TGGT1_208790-t26_1 | gene=TGGT1_208790 | organism=Toxoplasma_gondii_GT1 | gene_product=Putative MC family transporter [Source:UniProtKB/TrEMBL;Acc:A0A125YLN1] | transcript_product=putative MC family transporter | location=TGGT1_chrIb:876872-880126(-) | protein_length=310 | sequence_SO=chromosome | SO=protein_coding_gene | is_pseudo=false	0	45.328	38	10	69	10	310	33.6	9.92	96.5	10	0.999	0.995	0	-0.01	0.690569	0.737851	0.971725	0.976829	18.38	27.98	-0.18	0	0.19	0.29	-0.01	-0.38	5.9428e+06	5.6994e+06	6.82037e+06	26.43	29.4	14.67	5.9428e+06	5.52959e+06	8.80999e+06	8.75542e+06	5.6994e+06	5.19733e+06	6.82037e+06	5.79217e+06	6.44793e+06	6.76442e+06	7.32125e+06	9.78434e+06
FALSE	High	Master Protein	TGGT1_410360-t26_1-p1	transcript=TGGT1_410360-t26_1 | gene=TGGT1_410360 | organism=Toxoplasma_gondii_GT1 | gene_product=Putative transmembrane protein [Source:UniProtKB/TrEMBL;Acc:S7ULN4] | transcript_product=putative transmembrane protein | location=TGGT1_chrII:71310-72374(+) | protein_length=354 | sequence_SO=chromosome | SO=protein_coding_gene | is_pseudo=false	0	45.166	28	7	99	2	354	38.1	6.11	167.74	7	1.027	1.157	0.04	0.21	0.751971	0.461081	0.993588	0.924827	10.36	13.53	0.14	-0.47	0.04	0.34	0.21	-0.63	1.6487e+06	1.87695e+06	1.51968e+06	17.05	28.4	11.7	1.72805e+06	1.23915e+06	1.6487e+06	1.87695e+06	2.07964e+06	1.15826e+06	1.16829e+06	1.80335e+06	1.51968e+06	1.79316e+06	1.92456e+06	2.16434e+06
FALSE	High	Master Protein	TGGT1_300100-t26_1-p1	transcript=TGGT1_300100-t26_1 | gene=TGGT1_300100 | organism=Toxoplasma_gondii_GT1 | gene_product=Rhoptry neck protein RON2 [Source:UniProtKB/TrEMBL;Acc:S7UGV9] | transcript_product=rhoptry neck protein RON2 | location=TGGT1_chrXII:175560-186129(-) | protein_length=1479 | sequence_SO=chromosome | SO=protein_coding_gene | is_pseudo=false	0	45.151	9	12	53	12	1479	166.3	9.58	28	12	1.176	0.839	0.23	-0.25	0.933324	0.904548	0.995562	0.987776	4.76	1.39	0.23	0.28	-0.26	-0.25	-0.35	-0.24	2.38579e+06	1.80087e+06	2.2395e+06	13.04	9.01	8.02	2.57314e+06	2.38579e+06	1.98259e+06	1.80087e+06	1.64711e+06	1.97268e+06	1.9794e+06	2.2395e+06	2.31134e+06	1.9789e+06	2.22285e+06	2.81762e+06
FALSE	High	Master Protein	TGGT1_278990-t26_1-p1	transcript=TGGT1_278990-t26_1 | gene=TGGT1_278990 | organism=Toxoplasma_gondii_GT1 | gene_product=Putative phosphate carrier [Source:UniProtKB/TrEMBL;Acc:A0A125YTR2] | transcript_product=putative phosphate carrier | location=TGGT1_chrXII:5622211-5625652(-) | protein_length=479 | sequence_SO=chromosome | SO=protein_coding_gene | is_pseudo=false	0	45.121	20	8	102	8	479	53.1	9.41	147.14	8	0.987	1.133	-0.02	0.18	0.664737	0.496542	0.971725	0.943899	24.74	24.79	-0.4	-0.02	0.25	0.4	0.18	-0.42	7.18246e+06	8.59322e+06	8.04817e+06	26.39	26.34	20.11	7.08671e+06	7.18246e+06	1.09807e+07	1.07788e+07	8.59322e+06	6.27516e+06	6.39648e+06	7.16378e+06	7.43038e+06	8.04817e+06	1.02416e+07	1.17455e+07
FALSE	High	Master Protein	TGGT1_216530-t26_1-p1	transcript=TGGT1_216530-t26_1 | gene=TGGT1_216530 | organism=Toxoplasma_gondii_GT1 | gene_product=RRF domain-containing protein [Source:UniProtKB/TrEMBL;Acc:S7UM11] | transcript_product=ribosome recycling factor protein | location=TGGT1_chrXI:6012909-6015643(-) | protein_length=257 | sequence_SO=chromosome | SO=protein_coding_gene | is_pseudo=false	0	44.995	46	9	85	9	257	28.5	9.1	95	9	0.922	0.778	-0.12	-0.36	0.525433	0.748591	0.951523	0.976829	7.39	1.49	-0.12	0.22	-0.19	-0.36	-0.19	-0.38	7.27689e+06	5.5489e+06	7.0025e+06	14.57	7.42	5.71	7.27689e+06	7.32077e+06	5.60071e+06	5.81441e+06	5.5489e+06	5.01823e+06	7.02629e+06	7.0025e+06	6.34294e+06	7.22602e+06	7.3258e+06	7.04078e+06
FALSE	High	Master Protein	TGGT1_218410-t26_1-p1	transcript=TGGT1_218410-t26_1 | gene=TGGT1_218410 | organism=Toxoplasma_gondii_GT1 | gene_product=60S acidic ribosomal protein P0 [Source:UniProtKB/TrEMBL;Acc:A0A125YFP0] | transcript_product=ribosomal protein RPP0 | location=TGGT1_chrXII:1471598-1473146(+) | protein_length=314 | sequence_SO=chromosome | SO=protein_coding_gene | is_pseudo=false	0	43.84	39	9	43	9	314	34.1	5.6	62.78	9	1.488	0.86	0.57	-0.22	0.436597	0.957911	0.949873	0.987776	32.13	1.21	0.86	0.57	-0.01	-0.6	-0.21	-0.22	4.55538e+06	2.35062e+06	3.67622e+06	30.24	31.02	27.11	7.21092e+06	4.28273e+06	4.55538e+06	2.35062e+06	2.32781e+06	3.86981e+06	2.4535e+06	2.63547e+06	3.88003e+06	3.67622e+06	4.38759e+06	6.31589e+06
FALSE	High	Master Protein	TGGT1_264450-t26_1-p1	transcript=TGGT1_264450-t26_1 | gene=TGGT1_264450 | organism=Toxoplasma_gondii_GT1 | gene_product=DNA topoisomerase [Source:UniProtKB/TrEMBL;Acc:S7UGQ0] | transcript_product=putative DNA topoisomerase III beta-1 | location=TGGT1_chrIX:2040112-2057666(+) | protein_length=852 | sequence_SO=chromosome | SO=protein_coding_gene | is_pseudo=false	0	43.687	15	8	24	8	852	94.8	7.88	21.85	8	1.114	0.48	0.16	-1.06	0.939374	0.107465	0.995562	0.549118	13.49	11.31	0.02	0.83	0.16	-1.06	-0.58	-1.17	1.35996e+06	395855	1.00361e+06	6.94	13.16	14.2	1.35996e+06	1.48563e+06	1.29746e+06	395855	445933	342068	466664	462959	290371	1.16096e+06	1.23675e+06	1.93532e+06
FALSE	High	Master Protein	TGGT1_245470-t26_1-p1	transcript=TGGT1_245470-t26_1 | gene=TGGT1_245470 | organism=Toxoplasma_gondii_GT1 | gene_product=Mitotic checkpoint protein, BUB3 family protein [Source:UniProtKB/TrEMBL;Acc:A0A125YYJ7] | transcript_product=mitotic checkpoint protein, BUB3 family protein | location=TGGT1_chrXII:2225657-2230112(+) | protein_length=332 | sequence_SO=chromosome | SO=protein_coding_gene | is_pseudo=false	0	43.608	33	9	37	9	332	36.6	8.05	35.34	9	1.127	0.599	0.17	-0.74	0.965284	0.309521	0.995562	0.860254	6.94	1.36	0.1	0.29	0.17	-0.75	-0.18	-0.74	3.77164e+06	2.16291e+06	3.21182e+06	10.9	10.72	30.48	4.34527e+06	3.77164e+06	3.52029e+06	2.16291e+06	2.44722e+06	1.97993e+06	2.40993e+06	2.51785e+06	2.29121e+06	4.79455e+06	5.30056e+06	6.1446e+06
FALSE	High	Master Protein	TGGT1_226240-t26_1-p1	transcript=TGGT1_226240-t26_1 | gene=TGGT1_226240 | organism=Toxoplasma_gondii_GT1 | gene_product=C2H2-type domain-containing protein [Source:UniProtKB/TrEMBL;Acc:S7WCZ3] | transcript_product=putative bud site selection protein | location=TGGT1_chrX:1681533-1683187(-) | protein_length=198 | sequence_SO=chromosome | SO=protein_coding_gene | is_pseudo=false	0	43.553	34	5	73	5	198	23.2	10.15	135.87	5	1.048	0.968	0.07	-0.05	0.796032	0.79386	0.995562	0.987776	13.32	7.73	-0.07	0.23	0.07	-0.39	-0.05	0.03	6.34907e+06	4.97945e+06	5.94997e+06	5.3	12.55	3.56	5.95857e+06	6.62446e+06	6.34907e+06	4.97945e+06	5.70628e+06	4.44484e+06	6.17061e+06	6.32353e+06	5.94997e+06	6.04224e+06	5.74727e+06	6.91567e+06
FALSE	High	Master Protein	TGGT1_232710-t26_1-p1	transcript=TGGT1_232710-t26_1 | gene=TGGT1_232710 | organism=Toxoplasma_gondii_GT1 | gene_product=40S ribosomal protein S3a [Source:UniProtKB/TrEMBL;Acc:A0A125YZM8] | transcript_product=ribosomal protein RPS3A | location=TGGT1_chrVIII:2231374-2232762(+) | protein_length=259 | sequence_SO=chromosome | SO=protein_coding_gene | is_pseudo=false	0	42.547	31	7	79	7	259	29.4	9.57	80.99	7	1.142	0.644	0.19	-0.63	0.996393	0.410267	0.998872	0.920068	15.5	30.68	0.19	0.61	0.03	-0.91	-0.63	-0.24	4.04827e+06	1.84329e+06	3.4128e+06	8.23	37.36	17.01	4.04827e+06	4.50971e+06	3.84615e+06	1.84329e+06	1.73652e+06	3.26316e+06	3.3978e+06	2.66856e+06	4.43036e+06	3.60716e+06	3.42945e+06	3.76084e+06
FALSE	High	Master Protein	TGGT1_202470-t26_1-p1	transcript=TGGT1_202470-t26_1 | gene=TGGT1_202470 | organism=Toxoplasma_gondii_GT1 | gene_product=C2H2-type domain-containing protein [Source:UniProtKB/TrEMBL;Acc:S7UVH7] | transcript_product=rRNA metabolism protein, SBDS family protein | location=TGGT1_chrVIIa:3201329-3205558(+) | protein_length=735 | sequence_SO=chromosome | SO=protein_coding_gene | is_pseudo=false	0	42.265	19	13	48	13	735	80.5	8.22	25.35	13	0.756	0.638	-0.4	-0.65	0.221397	0.394839	0.791909	0.906667	13.02	26.25	0.08	-0.52	-0.4	-0.65	-0.37	-0.93	2.34363e+06	1.71006e+06	3.21573e+06	21.25	15.51	15.1	2.88825e+06	1.88179e+06	2.34363e+06	1.71006e+06	2.05953e+06	1.52023e+06	2.27244e+06	2.17348e+06	1.8901e+06	2.79341e+06	3.21573e+06	3.77528e+06
FALSE	High	Master Protein	TGGT1_209030-t26_1-p1	transcript=TGGT1_209030-t26_1 | gene=TGGT1_209030 | organism=Toxoplasma_gondii_GT1 | gene_product=Actin ACT1 [Source:UniProtKB/TrEMBL;Acc:A0A125YH17] | transcript_product=actin ACT1 | location=TGGT1_chrIb:1014618-1016180(+) | protein_length=376 | sequence_SO=chromosome | SO=protein_coding_gene | is_pseudo=false	0	42.197	30	9	51	9	376	41.9	5.16	80.12	9	0.755	1.121	-0.4	0.16	0.220468	0.514581	0.791909	0.960076	13.3	16.91	-0.14	-0.4	-0.53	0.16	-0.14	0.32	1.78132e+06	2.33568e+06	2.06488e+06	8.83	36.17	13.22	1.78132e+06	1.54582e+06	1.82963e+06	2.33568e+06	2.01092e+06	3.86495e+06	2.58441e+06	2.50647e+06	5.20143e+06	1.76874e+06	1.75161e+06	2.23883e+06
FALSE	High	Master Protein	TGGT1_240850-t26_1-p1	transcript=TGGT1_240850-t26_1 | gene=TGGT1_240850 | organism=Toxoplasma_gondii_GT1 | gene_product=WD domain, G-beta repeat-containing protein [Source:UniProtKB/TrEMBL;Acc:S7W6X8] | transcript_product=WD domain, G-beta repeat-containing protein | location=TGGT1_chrVI:1446379-1451610(+) | protein_length=547 | sequence_SO=chromosome | SO=protein_coding_gene | is_pseudo=false	0	42.073	21	10	46	10	547	59.2	9.06	42.05	10	0.88	0.92	-0.18	-0.12	0.439179	0.898846	0.949873	0.987776	12.62	1.14	0.13	-0.18	-0.3	-0.12	-0.11	-0.21	3.33687e+06	3.59702e+06	4.15706e+06	13.47	1.09	3.03	4.15191e+06	3.33687e+06	3.2917e+06	3.59091e+06	3.66213e+06	3.59702e+06	4.15706e+06	4.11985e+06	4.35713e+06	4.16059e+06	4.01936e+06	4.42844e+06
FALSE	High	Master Protein	TGGT1_294980-t26_1-p1	transcript=TGGT1_294980-t26_1 | gene=TGGT1_294980 | organism=Toxoplasma_gondii_GT1 | gene_product=hypothetical protein | transcript_product=hypothetical protein | location=TGGT1_chrIa:1287876-1289315(+) | protein_length=270 | sequence_SO=chromosome | SO=protein_coding_gene | is_pseudo=false	0	42.056	31	5	68	5	270	29.2	11.37	94.6	5	1.584	1.302	0.66	0.38	0.335376	0.292836	0.938934	0.839949	8.94	36.94	0.66	0.57	1.02	0.71	0.38	-0.03	5.2495e+06	4.01554e+06	2.90995e+06	9.04	28.99	18.59	5.64074e+06	4.70545e+06	5.2495e+06	4.24673e+06	4.01554e+06	2.36389e+06	2.90995e+06	3.94575e+06	2.27885e+06	3.06125e+06	3.32701e+06	4.32493e+06
FALSE	High	Master Protein	TGGT1_227360-t26_1-p1	transcript=TGGT1_227360-t26_1 | gene=TGGT1_227360 | organism=Toxoplasma_gondii_GT1 | gene_product=Ribosomal protein RPL3 [Source:UniProtKB/TrEMBL;Acc:A0A125YQV1] | transcript_product=ribosomal protein RPL3 | location=TGGT1_chrX:901297-903989(-) | protein_length=389 | sequence_SO=chromosome | SO=protein_coding_gene | is_pseudo=false	0	41.429	28	10	50	10	389	44	10.3	34.38	10	1.525	0.732	0.61	-0.45	0.394495	0.628459	0.949873	0.973941	3.89	9.61	0.61	0.65	-0.01	-0.96	-0.45	-0.35	3.92045e+06	1.52789e+06	3.53754e+06	20.3	41.45	27.86	4.93476e+06	3.30561e+06	3.92045e+06	1.52789e+06	1.49181e+06	2.93421e+06	1.83062e+06	1.77193e+06	3.00828e+06	3.53754e+06	3.41649e+06	5.06196e+06
FALSE	High	Master Protein	TGGT1_229210-t26_1-p1	transcript=TGGT1_229210-t26_1 | gene=TGGT1_229210 | organism=Toxoplasma_gondii_GT1 | gene_product=Putative small nuclear ribonucleoprotein polypeptide A [Source:UniProtKB/TrEMBL;Acc:A0A125YG91] | transcript_product=putative small nuclear ribonucleoprotein polypeptide A' | location=TGGT1_chrVIII:92114-95816(-) | protein_length=254 | sequence_SO=chromosome | SO=protein_coding_gene | is_pseudo=false	0	41.255	31	7	42	7	254	28.7	7.11	36.29	7	0.988	0.67	-0.02	-0.58	0.66621	0.470805	0.971725	0.927945	10.1	24.75	0.32	-0.11	-0.02	-0.58	-0.1	-0.8	4.28874e+06	1.6557e+06	2.75221e+06	22.82	21.27	38.58	5.13721e+06	3.21798e+06	4.28874e+06	1.6557e+06	2.10863e+06	1.38588e+06	1.6917e+06	2.26561e+06	1.72597e+06	4.61185e+06	4.30576e+06	6.98069e+06
FALSE	High	Master Protein	TGGT1_282170-t26_1-p1	transcript=TGGT1_282170-t26_1 | gene=TGGT1_282170 | organism=Toxoplasma_gondii_GT1 | gene_product=hypothetical protein | transcript_product=hypothetical protein | location=TGGT1_chrVIIa:4320803-4324793(-) | protein_length=575 | sequence_SO=chromosome | SO=protein_coding_gene | is_pseudo=false	0	41.158	23	10	63	10	575	61.2	7.56	69.18	10	1.231	1.249	0.3	0.32	0.826666	0.346625	0.995562	0.883421	15.74	1.42	0.3	0.45	0.06	0.33	0.32	0.11	6.08624e+06	5.82938e+06	4.88432e+06	8.35	3.74	5.45	6.08624e+06	6.28099e+06	5.34655e+06	5.82938e+06	5.87321e+06	5.48186e+06	5.1677e+06	4.88432e+06	5.17696e+06	4.64312e+06	5.59832e+06	5.98766e+06
FALSE	High	Master Protein	TGGT1_264660-t26_1-p1	transcript=TGGT1_264660-t26_1 | gene=TGGT1_264660 | organism=Toxoplasma_gondii_GT1 | gene_product=SAG-related sequence SRS44 [Source:UniProtKB/TrEMBL;Acc:S7VP87] | transcript_product=SAG-related sequence SRS44 | location=TGGT1_chrIX:1955976-1963333(+) | protein_length=2359 | sequence_SO=chromosome | SO=protein_coding_gene | is_pseudo=false	0	40.498	7	13	24	13	2359	251.8	8.02	19.68	13	1.463	5.642	0.55	2.5	0.466447	7.09583e-07	0.949873	1.14892e-05	10.02	8.74	0.55	1.33	0.45	2.39	2.5	2.58	1.53213e+06	4.42561e+06	1.51139e+06	6.32	11.36	11.32	1.49718e+06	1.68383e+06	1.53213e+06	4.42561e+06	3.9084e+06	4.91144e+06	1.51139e+06	1.59845e+06	1.75184e+06	1.14049e+06	1.40823e+06	1.63499e+06
FALSE	High	Master Protein	TGGT1_210095-t26_1-p1	transcript=TGGT1_210095-t26_1 | gene=TGGT1_210095 | organism=Toxoplasma_gondii_GT1 | gene_product=hypothetical protein | transcript_product=hypothetical protein | location=TGGT1_chrIb:1629844-1631103(-) | protein_length=365 | sequence_SO=chromosome | SO=protein_coding_gene | is_pseudo=false	0	40.482	21	5	107	2	365	38.6	8.75	179.81	5	0.537	0.754	-0.9	-0.41	0.0253238	0.685237	0.224297	0.973941	20.04	6.07	-0.9	-0.69	-1.42	-0.35	-0.41	-2.13	743482	936435	1.33948e+06	14.64	41.3	32.65	743482	807120	601869	936435	1.06965e+06	432990	995384	1.01293e+06	540470	1.08775e+06	1.33948e+06	2.02369e+06
FALSE	High	Master Protein	TGGT1_290920-t26_1-p1	transcript=TGGT1_290920-t26_1 | gene=TGGT1_290920 | organism=Toxoplasma_gondii_GT1 | gene_product=Fe2OG dioxygenase domain-containing protein [Source:UniProtKB/TrEMBL;Acc:S7UPA3] | transcript_product=oxidoreductase, 2OG-Fe(II) oxygenase family protein | location=TGGT1_chrIX:3746594-3750759(+) | protein_length=967 | sequence_SO=chromosome | SO=protein_coding_gene | is_pseudo=false	0	40.356	19	9	31	9	967	100.8	9.41	28.21	9	1.405	0.988	0.49	-0.02	0.542915	0.751719	0.956387	0.976829	11.77	16.97	0.28	0.6	0.49	0.16	-0.02	-0.66	2.03559e+06	919167	956501	1.69	17.58	20.27	1.98921e+06	2.03559e+06	2.05608e+06	919167	1.1917e+06	866577	646574	1.00812e+06	561077	956501	1.14873e+06	2.1502e+06
FALSE	High	Master Protein	TGGT1_290160-t26_1-p1	transcript=TGGT1_290160-t26_1 | gene=TGGT1_290160 | organism=Toxoplasma_gondii_GT1 | gene_product=Sortilin [Source:UniProtKB/TrEMBL;Acc:S7UPZ2] | transcript_product=putative sortilin | location=TGGT1_chrIX:3410442-3420211(-) | protein_length=1033 | sequence_SO=chromosome | SO=protein_coding_gene | is_pseudo=false	0	40.088	16	12	43	12	1033	113.5	6.67	19.85	12	1.62	1.011	0.7	0.02	0.302697	0.706775	0.911301	0.973941	11.3	4.26	0.9	0.7	0.58	0.02	-0.06	0.06	3.68301e+06	2.24913e+06	2.67991e+06	10.45	17.39	12.4	4.36512e+06	3.68301e+06	3.63894e+06	1.91635e+06	2.24913e+06	2.71001e+06	2.11337e+06	2.27881e+06	2.68119e+06	3.6276e+06	4.17112e+06	2.67991e+06
FALSE	High	Master Protein	TGGT1_292130-t26_1-p1	transcript=TGGT1_292130-t26_1 | gene=TGGT1_292130 | organism=Toxoplasma_gondii_GT1 | gene_product=Ribosomal protein RPL13A [Source:UniProtKB/TrEMBL;Acc:A0A125YU05] | transcript_product=ribosomal protein RPL13A | location=TGGT1_chrIX:4373947-4376715(-) | protein_length=286 | sequence_SO=chromosome | SO=protein_coding_gene | is_pseudo=false	0	39.906	28	7	50	7	286	32.7	10.65	61.46	7	1.527	0.777	0.61	-0.36	0.392194	0.746926	0.949873	0.976829	44.01	7.57	0.99	0.61	-0.29	-0.89	-0.29	-0.36	2.69971e+06	1.27332e+06	2.17288e+06	33.45	37.52	29.09	4.49199e+06	2.69971e+06	2.53713e+06	1.12479e+06	1.27332e+06	2.18316e+06	1.17414e+06	1.29344e+06	2.25186e+06	2.17288e+06	2.39765e+06	3.15627e+06
FALSE	High	Master Protein	TGGT1_263090-t26_1-p1	transcript=TGGT1_263090-t26_1 | gene=TGGT1_263090 | organism=Toxoplasma_gondii_GT1 | gene_product=14_3_3 domain-containing protein [Source:UniProtKB/TrEMBL;Acc:A0A125YLJ3] | transcript_product=14-3-3 protein | location=TGGT1_chrVIIb:786880-789511(+) | protein_length=323 | sequence_SO=chromosome | SO=protein_coding_gene | is_pseudo=false	0	39.859	29	10	39	10	323	37.2	5.14	39.41	10	1.055	0.762	0.08	-0.39	0.812843	0.706386	0.995562	0.973941	24.08	4.29	0.52	0.08	-0.18	-0.39	-0.24	-0.43	4.54278e+06	2.81693e+06	3.35958e+06	8.96	21.68	23.5	5.09059e+06	4.54278e+06	4.27605e+06	2.35196e+06	2.81693e+06	3.60655e+06	2.55667e+06	3.08282e+06	4.75683e+06	3.31524e+06	3.35958e+06	4.80687e+06
FALSE	High	Master Protein	TGGT1_256050-t26_1-p1	transcript=TGGT1_256050-t26_1 | gene=TGGT1_256050 | organism=Toxoplasma_gondii_GT1 | gene_product=Signal recognition particle 14kd protein [Source:UniProtKB/TrEMBL;Acc:S7UZB8] | transcript_product=signal recognition particle 14kd protein | location=TGGT1_chrVIIb:4458829-4459605(+) | protein_length=172 | sequence_SO=chromosome | SO=protein_coding_gene | is_pseudo=false	0	39.681	52	9	101	9	172	18.9	9.76	170.68	9	1.53	0.381	0.61	-1.39	0.388679	0.0261327	0.949873	0.195027	14.28	28.56	-0.06	0.61	0.75	-1.39	-1.65	-0.84	1.67768e+07	5.86393e+06	1.64693e+07	15.08	13.81	24.07	1.58833e+07	2.09309e+07	1.67768e+07	5.86393e+06	5.14609e+06	6.78002e+06	8.9565e+06	6.73199e+06	8.25082e+06	1.64693e+07	1.77032e+07	2.05971e+07
FALSE	High	Master Protein	TGGT1_258070-t26_1-p1	transcript=TGGT1_258070-t26_1 | gene=TGGT1_258070 | organism=Toxoplasma_gondii_GT1 | gene_product=hypothetical protein | transcript_product=hypothetical protein | location=TGGT1_chrVIIb:3570890-3578893(-) | protein_length=678 | sequence_SO=chromosome | SO=protein_coding_gene | is_pseudo=false	0	39.576	19	9	42	9	678	75.7	8.73	16.4	9	0.781	0.389	-0.36	-1.36	0.259579	0.0302541	0.851439	0.215795	5.54	22.18	-0.26	-0.41	-0.36	-1.36	-1.59	-1.13	2.97097e+06	1.24689e+06	3.77454e+06	1.99	18.46	13.42	2.90423e+06	2.97097e+06	3.0218e+06	1.24689e+06	1.09993e+06	1.5712e+06	1.77499e+06	1.46226e+06	1.5945e+06	3.02122e+06	3.91069e+06	5.87902e+06
FALSE	High	Master Protein	TGGT1_215980-t26_1-p1	transcript=TGGT1_215980-t26_1 | gene=TGGT1_215980 | organism=Toxoplasma_gondii_GT1 | gene_product=hypothetical protein | transcript_product=hypothetical protein | location=TGGT1_chrXI:6414554-6415186(+) | protein_length=210 | sequence_SO=chromosome | SO=protein_coding_gene | is_pseudo=false	0	38.6	34	8	175	8	210	24.5	8.34	263.81	8	1.412	0.978	0.5	-0.03	0.532267	0.771923	0.953376	0.978242	3.62	7.08	0.53	0.31	0.5	0.31	-0.03	-0.1	1.35497e+08	8.76963e+07	8.41992e+07	5.04	18.17	5.81	1.39927e+08	1.35497e+08	1.26659e+08	8.76963e+07	8.99174e+07	6.35837e+07	6.55296e+07	9.03129e+07	6.15666e+07	8.57144e+07	9.61968e+07	1.15399e+08
FALSE	High	Master Protein	TGGT1_226050-t26_1-p1	transcript=TGGT1_226050-t26_1 | gene=TGGT1_226050 | organism=Toxoplasma_gondii_GT1 | gene_product=RBR-type E3 ubiquitin transferase [Source:UniProtKB/TrEMBL;Acc:S7UWI8] | transcript_product=hypothetical protein | location=TGGT1_chrX:1753736-1757511(-) | protein_length=774 | sequence_SO=chromosome | SO=protein_coding_gene | is_pseudo=false	0	38.301	10	8	36	8	774	83.8	9.25	33.75	8	1.202	1.054	0.27	0.08	0.881965	0.624552	0.995562	0.973941	1.85	6.08	0.25	0.27	0.42	0.08	0.02	0.89	1.92398e+06	1.57619e+06	1.26647e+06	11.66	38.38	14.86	1.95132e+06	1.92398e+06	1.57177e+06	1.57619e+06	1.41459e+06	2.76273e+06	2.38954e+06	1.43718e+06	2.40885e+06	975029	1.21963e+06	1.39264e+06
FALSE	High	Master Protein	TGGT1_411470-t26_1-p1	transcript=TGGT1_411470-t26_1 | gene=TGGT1_411470 | organism=Toxoplasma_gondii_GT1 | gene_product=Putative transmembrane protein [Source:UniProtKB/TrEMBL;Acc:S7UG13] | transcript_product=putative transmembrane protein | location=AAQM03000493:218-1321(-) | protein_length=367 | sequence_SO=contig | SO=protein_coding_gene | is_pseudo=false	0	38.105	30	8	85	1	367	40.3	7.44	146.55	8	1.038	1.212	0.05	0.28	0.775916	0.389862	0.995562	0.902957	23.26	4.1	-0.19	0.58	0.05	0.32	0.28	-0.44	137939	121535	122182	16.96	21.87	14.01	106971	150369	137939	152143	121535	98086.3	109302	92525.4	87212.5	122182	164658	197851
FALSE	High	Master Protein	TGGT1_410610-t26_1-p1	transcript=TGGT1_410610-t26_1 | gene=TGGT1_410610 | organism=Toxoplasma_gondii_GT1 | gene_product=Protein kinase domain-containing protein [Source:UniProtKB/TrEMBL;Acc:S7VXS4] | transcript_product=hypothetical protein | location=AAQM03000304:1400-3338(-) | protein_length=248 | sequence_SO=contig | SO=protein_coding_gene | is_pseudo=false	0	38.07	27	5	73	4	248	26.8	11.37	115.91	5	0.883	1.019	-0.18	0.03	0.444724	0.691187	0.949873	0.973941	31.81	68.02	0.17	-0.18	-1.3	0.03	0.57	-1.42	2.91165e+06	4.22268e+06	3.98035e+06	28.41	64.09	40.79	4.02867e+06	2.91165e+06	2.30281e+06	4.22268e+06	8.43053e+06	2.20821e+06	3.12033e+06	3.98035e+06	1.15261e+06	3.18944e+06	2.92032e+06	6.80388e+06
FALSE	High	Master Protein	TGGT1_254720-t26_1-p1	transcript=TGGT1_254720-t26_1 | gene=TGGT1_254720 | organism=Toxoplasma_gondii_GT1 | gene_product=Dense granule protein GRA8 [Source:UniProtKB/TrEMBL;Acc:A0A125YYI5] | transcript_product=dense granule protein GRA8 | location=TGGT1_chrIII:1884681-1885484(+) | protein_length=267 | sequence_SO=chromosome | SO=protein_coding_gene | is_pseudo=false	0	37.57	19	5	94	5	267	28.5	10.76	158.84	5	0.919	1.448	-0.12	0.53	0.519036	0.182049	0.951523	0.685661	15.82	4.01	0.04	-0.49	-0.12	0.53	0.57	0	3.63602e+06	6.01684e+06	4.05849e+06	9.8	33.58	11.75	3.87628e+06	3.18773e+06	3.63602e+06	6.01684e+06	6.38123e+06	3.19275e+06	4.07214e+06	4.96219e+06	2.9305e+06	3.73902e+06	4.05849e+06	4.70054e+06
FALSE	High	Master Protein	TGGT1_236130-t26_1-p1	transcript=TGGT1_236130-t26_1 | gene=TGGT1_236130 | organism=Toxoplasma_gondii_GT1 | gene_product=SRP9-21 domain-containing protein [Source:UniProtKB/TrEMBL;Acc:S7URQ2] | transcript_product=signal recognition particle (SRP9) domain-containing protein | location=TGGT1_chrX:5181189-5184311(+) | protein_length=206 | sequence_SO=chromosome | SO=protein_coding_gene | is_pseudo=false	0	37.109	31	5	73	5	206	23.4	9.99	143.07	5	1.315	0.46	0.39	-1.12	0.679387	0.0847925	0.971725	0.464917	11.68	22.11	-0.17	0.5	0.39	-1.12	-1.32	-0.58	1.1076e+07	4.69376e+06	1.21668e+07	11.55	15.98	1.77	1.10061e+07	1.34059e+07	1.1076e+07	4.69376e+06	3.91858e+06	5.41249e+06	6.88384e+06	5.7236e+06	5.86614e+06	1.24509e+07	1.21668e+07	1.35563e+07
FALSE	High	Master Protein	TGGT1_233460-t26_1-p1	transcript=TGGT1_233460-t26_1 | gene=TGGT1_233460 | organism=Toxoplasma_gondii_GT1 | gene_product=SAG-related sequence SRS29B [Source:UniProtKB/TrEMBL;Acc:A0A125YG48] | transcript_product=SAG-related sequence SRS29B | location=TGGT1_chrVIII:2660455-2661465(+) | protein_length=336 | sequence_SO=chromosome | SO=protein_coding_gene | is_pseudo=false	0	36.459	34	8	52	8	336	34.8	8.02	80.77	8	0.951	1.053	-0.07	0.07	0.586616	0.628013	0.971725	0.973941	29.45	5.91	-0.64	0.25	-0.07	0.02	0.07	1.43	2.67797e+06	4.13564e+06	3.5828e+06	24.22	42.46	24.37	2.36362e+06	3.71474e+06	2.67797e+06	4.08743e+06	4.13564e+06	8.11743e+06	4.91991e+06	4.79311e+06	1.09799e+07	3.5828e+06	3.50253e+06	2.51476e+06
FALSE	High	Master Protein	TGGT1_319560-t26_1-p1	transcript=TGGT1_319560-t26_1 | gene=TGGT1_319560 | organism=Toxoplasma_gondii_GT1 | gene_product=EGF-like domain-containing protein [Source:UniProtKB/TrEMBL;Acc:S7VSV0] | transcript_product=microneme protein MIC3 | location=TGGT1_chrIV:856315-857588(+) | protein_length=383 | sequence_SO=chromosome | SO=protein_coding_gene | is_pseudo=false	0	36.381	15	5	78	5	383	40.5	6.64	174.48	5	0.345	0.92	-1.53	-0.12	0.000398737	0.899945	0.00868599	0.987776	7.87	48.22	-1.61	-1.53	-0.96	-0.53	-0.12	1.11	5.44121e+06	2.24706e+07	2.18647e+07	7.96	14.23	19.94	5.97725e+06	5.10818e+06	5.44121e+06	2.3918e+07	1.8052e+07	2.24706e+07	3.56179e+07	2.18647e+07	2.10803e+07	1.04306e+07	8.18822e+06	8.21598e+06
FALSE	High	Master Protein	TGGT1_266470-t26_1-p1	transcript=TGGT1_266470-t26_1 | gene=TGGT1_266470 | organism=Toxoplasma_gondii_GT1 | gene_product=hypothetical protein | transcript_product=hypothetical protein | location=TGGT1_chrIX:940675-941958(+) | protein_length=120 | sequence_SO=chromosome | SO=protein_coding_gene | is_pseudo=false	0	35.642	36	7	82	7	120	14.1	9.19	139.75	7	0.972	0.984	-0.04	-0.02	0.631331	0.759888	0.971725	0.97703	32.65	4.94	-0.55	0.32	-0.04	-0.07	-0.02	0.45	9.14373e+06	9.6488e+06	8.98333e+06	17.22	23.14	14.5	8.72185e+06	1.18654e+07	9.14373e+06	8.86724e+06	9.6488e+06	1.34781e+07	1.14342e+07	9.91705e+06	9.84775e+06	7.63155e+06	7.3546e+06	9.90943e+06
FALSE	High	Master Protein	TGGT1_231460-t26_1-p1	transcript=TGGT1_231460-t26_1 | gene=TGGT1_231460 | organism=Toxoplasma_gondii_GT1 | gene_product=hypothetical protein | transcript_product=hypothetical protein | location=TGGT1_chrVIII:1437962-1441644(+) | protein_length=688 | sequence_SO=chromosome | SO=protein_coding_gene | is_pseudo=false	0	35.634	15	8	54	8	688	75.3	10.04	59.69	8	1.104	0.904	0.14	-0.14	0.916641	0.935926	0.995562	0.987776	12.72	7.32	-0.14	0.26	0.14	-0.21	-0.01	-0.14	1.58963e+08	1.83898e+08	1.84153e+08	19.22	13.99	11.28	1.58963e+08	1.34669e+08	1.97044e+08	1.83898e+08	1.70603e+08	2.22411e+08	1.77455e+08	1.84153e+08	2.71984e+08	1.83029e+08	2.35284e+08	2.2195e+08
FALSE	High	Master Protein	TGGT1_248200-t26_1-p1	transcript=TGGT1_248200-t26_1 | gene=TGGT1_248200 | organism=Toxoplasma_gondii_GT1 | gene_product=rRNA adenine N(6)-methyltransferase [Source:UniProtKB/TrEMBL;Acc:S7V0X8] | transcript_product=putative ribosomal RNA (adenine(1779)-N(6)/adenine(1780)-N(6))- dimethyltransferase | location=TGGT1_chrXII:3671879-3675571(+) | protein_length=494 | sequence_SO=chromosome | SO=protein_coding_gene | is_pseu…	0	35.497	25	9	55	9	494	53.8	9.32	55.52	9	1.156	1.156	0.21	0.21	0.973918	0.462772	0.996165	0.924827	30.45	3.08	-0.12	0.52	0.21	0.21	0.18	0.93	4.44158e+06	4.73433e+06	4.08832e+06	10.29	30.38	8.2	4.25619e+06	5.15631e+06	4.44158e+06	4.73433e+06	4.3207e+06	7.38958e+06	5.96542e+06	5.13679e+06	7.25639e+06	4.25645e+06	4.08832e+06	3.62447e+06
FALSE	High	Master Protein	TGGT1_239010-t26_1-p1	transcript=TGGT1_239010-t26_1 | gene=TGGT1_239010 | organism=Toxoplasma_gondii_GT1 | gene_product=hypothetical protein | transcript_product=hypothetical protein | location=TGGT1_chrVI:386043-388100(-) | protein_length=685 | sequence_SO=chromosome | SO=protein_coding_gene | is_pseudo=false	0	34.933	22	7	45	7	685	70.7	9.58	50.14	7	1.904	1.472	0.93	0.56	0.131594	0.167877	0.605807	0.669848	7.05	6.98	1	0.48	0.93	0.62	0.56	-0.06	5.52467e+06	5.07451e+06	3.23183e+06	10.03	30.54	16.04	5.52467e+06	5.98281e+06	4.89076e+06	5.09013e+06	5.07451e+06	2.79715e+06	3.23183e+06	3.81813e+06	2.77025e+06	3.73206e+06	4.88279e+06	5.31225e+06
FALSE	High	Master Protein	TGGT1_233410-t26_1-p1	transcript=TGGT1_233410-t26_1 | gene=TGGT1_233410 | organism=Toxoplasma_gondii_GT1 | gene_product=WD_REPEATS_REGION domain-containing protein [Source:UniProtKB/TrEMBL;Acc:S7WBZ2] | transcript_product=Sof1 family domain-containing protein | location=TGGT1_chrVIII:2626293-2633881(-) | protein_length=602 | sequence_SO=chromosome | SO=protein_coding_gene | is_pseudo=false	0	34.763	18	7	29	7	602	67.9	9.54	14.87	7	1.147	0.889	0.2	-0.17	0.991853	0.972899	0.998872	0.987776	9.47	19.54	-0.1	0.29	0.2	-0.17	-0.72	0.03	2.05347e+06	1.00475e+06	1.45479e+06	15.08	18.97	26.93	1.59163e+06	2.05347e+06	2.12655e+06	1.00475e+06	725439	1.05006e+06	1.22329e+06	939515	1.14136e+06	1.8894e+06	2.02116e+06	2.37216e+06
FALSE	High	Master Protein	TGGT1_286710-t26_1-p1	transcript=TGGT1_286710-t26_1 | gene=TGGT1_286710 | organism=Toxoplasma_gondii_GT1 | gene_product=C2H2-type domain-containing protein [Source:UniProtKB/TrEMBL;Acc:A0A125YTX8] | transcript_product=zinc finger, c2h2 type domain-containing protein | location=TGGT1_chrV:1567859-1570970(-) | protein_length=287 | sequence_SO=chromosome | SO=protein_coding_gene | is_pseudo=false	0	34.475	18	4	43	4	287	30.2	8.56	47.83	4	1.344	0.627	0.43	-0.67	0.632274	0.371251	0.971725	0.888356	44.26	7.79	0.88	0.43	-0.08	-0.67	-0.47	-0.75	2.20441e+06	922904	1.62557e+06	23.8	18.9	22.58	3.1227e+06	2.03743e+06	2.20441e+06	922904	966416	668202	882340	1.1057e+06	661280	2.15622e+06	2.59717e+06	4.05707e+06
FALSE	High	Master Protein	TGGT1_306030-t26_1-p1	transcript=TGGT1_306030-t26_1 | gene=TGGT1_306030 | organism=Toxoplasma_gondii_GT1 | gene_product=Glutathione s-transferase, n-terminal domain containing protein [Source:UniProtKB/TrEMBL;Acc:A0A125YIG3] | transcript_product=glutathione s-transferase, n-terminal domain containing protein | location=TGGT1_chrIX:5538577-5544690(-) | protein_length=333 | sequence_SO=chromosome | SO=protein_coding_gen…	0	34.395	29	8	64	8	333	37.8	9.38	62.27	8	1.081	0.86	0.11	-0.22	0.86745	0.956173	0.995562	0.987776	13.32	10.24	-0.02	0.3	0.11	-0.22	-0.11	-0.85	3.74009e+06	2.54259e+06	3.67639e+06	9.54	11.81	21.98	3.5542e+06	3.74009e+06	4.26295e+06	2.54259e+06	2.77336e+06	2.18717e+06	1.99844e+06	2.37686e+06	2.1989e+06	3.67639e+06	4.77587e+06	6.45506e+06
FALSE	High	Master Protein	TGGT1_229480-t26_1-p1	transcript=TGGT1_229480-t26_1 | gene=TGGT1_229480 | organism=Toxoplasma_gondii_GT1 | gene_product=Putative calcium binding protein [Source:UniProtKB/TrEMBL;Acc:S7V2K1] | transcript_product=putative calcium binding protein precursor | location=TGGT1_chrVIII:289042-291582(-) | protein_length=335 | sequence_SO=chromosome | SO=protein_coding_gene | is_pseudo=false	0	34.352	32	7	31	7	335	38.3	4.69	32.07	7	1.418	0.914	0.5	-0.13	0.523861	0.913131	0.951523	0.987776	20.9	14.42	0.5	0.69	0.19	-0.26	-0.13	0.17	4.23524e+06	2.28194e+06	2.87975e+06	17.4	21.68	17.54	4.15925e+06	4.23524e+06	5.60168e+06	2.23459e+06	2.28194e+06	3.22683e+06	2.36063e+06	2.43507e+06	2.87975e+06	4.0798e+06	3.77136e+06	5.46893e+06
FALSE	High	Master Protein	TGGT1_218358-t26_1-p1	transcript=TGGT1_218358-t26_1 | gene=TGGT1_218358 | organism=Toxoplasma_gondii_GT1 | gene_product=Zinc knuckle domain-containing protein [Source:UniProtKB/TrEMBL;Acc:S7WA64] | transcript_product=zinc knuckle domain-containing protein | location=TGGT1_chrXII:1511909-1514768(-) | protein_length=442 | sequence_SO=chromosome | SO=protein_coding_gene | is_pseudo=false	0	34.292	18	6	28	6	442	48.5	9.85	41.75	6	0.374	0.124	-1.42	-3.01	0.000950255	1.85475e-07	0.0170201	3.18069e-06	8.99	2.09	-1.42	-0.64	-1.5	-2.99	-3.01	-3.73	742004	212536	1.90771e+06	21.77	29.31	18.01	742004	1.01357e+06	681448	242655	212536	131762	471201	341490	288414	1.90771e+06	1.58069e+06	2.27183e+06
FALSE	High	Master Protein	TGGT1_252290-t26_1-p1	transcript=TGGT1_252290-t26_1 | gene=TGGT1_252290 | organism=Toxoplasma_gondii_GT1 | gene_product=Importin subunit alpha [Source:UniProtKB/TrEMBL;Acc:A0A125YIC7] | transcript_product=putative importin alpha | location=TGGT1_chrIII:450884-460151(+) | protein_length=545 | sequence_SO=chromosome | SO=protein_coding_gene | is_pseudo=false	0	33.838	15	7	79	7	545	59.3	4.94	112.67	7	1.005	0.247	0.01	-2.02	0.702222	0.000720409	0.971725	0.00936531	22.01	12.81	-0.23	0.01	0.38	-2.02	-2.14	-1.51	4.7628e+06	1.17462e+06	5.30911e+06	12.04	9.9	3.14	4.10958e+06	4.7628e+06	5.23717e+06	1.15577e+06	1.17462e+06	1.37639e+06	1.64824e+06	1.50621e+06	1.52845e+06	5.38067e+06	5.30911e+06	6.22863e+06
FALSE	High	Master Protein	TGGT1_276170-t26_1-p1	transcript=TGGT1_276170-t26_1 | gene=TGGT1_276170 | organism=Toxoplasma_gondii_GT1 | gene_product=PI3K/PI4K domain-containing protein [Source:UniProtKB/TrEMBL;Acc:S7VW73] | transcript_product=phosphatidylinositol 3- and 4-kinase | location=TGGT1_chrIII:84006-93774(+) | protein_length=1228 | sequence_SO=chromosome | SO=protein_coding_gene | is_pseudo=false	0	33.779	9	8	25	8	1228	134.5	8.32	17.93	8	1.228	1.114	0.3	0.16	0.832408	0.525388	0.995562	0.960964	11.24	2.24	0.18	0.76	0.3	0.16	-0.16	0.18	2.23475e+06	1.41231e+06	1.42532e+06	9.54	21.44	10.79	2.23475e+06	2.29126e+06	1.91196e+06	1.41231e+06	1.21071e+06	1.83494e+06	1.80739e+06	1.45611e+06	1.94508e+06	1.26729e+06	1.42532e+06	1.57414e+06
FALSE	High	Master Protein	TGGT1_227280-t26_1-p1	transcript=TGGT1_227280-t26_1 | gene=TGGT1_227280 | organism=Toxoplasma_gondii_GT1 | gene_product=Dense granule protein GRA3 [Source:UniProtKB/TrEMBL;Acc:A0A125YJQ7] | transcript_product=dense granule protein GRA3 | location=TGGT1_chrX:956231-956899(-) | protein_length=222 | sequence_SO=chromosome | SO=protein_coding_gene | is_pseudo=false	0	33.403	24	5	131	5	222	24.2	9.44	247.86	5	1.027	1.494	0.04	0.58	0.750583	0.156109	0.993382	0.657139	8.13	0.84	0.12	0.04	-0.11	0.59	0.58	-0.2	2.54966e+07	3.50595e+07	2.49864e+07	11.06	29.53	5.76	2.91485e+07	2.34641e+07	2.54966e+07	4.10255e+07	3.50595e+07	2.21161e+07	2.49864e+07	2.90083e+07	3.02259e+07	2.16285e+07	2.34016e+07	2.6263e+07
FALSE	High	Master Protein	TGGT1_239260-t26_1-p1	transcript=TGGT1_239260-t26_1 | gene=TGGT1_239260 | organism=Toxoplasma_gondii_GT1 | gene_product=Histone H4 [Source:UniProtKB/TrEMBL;Acc:A0A125YHU3] | transcript_product=histone H4 | location=TGGT1_chrVI:491746-492057(-) | protein_length=103 | sequence_SO=chromosome | SO=protein_coding_gene | is_pseudo=false	0	33.353	50	5	111	5	103	11.4	11.36	160.45	5	0.99	0.735	-0.01	-0.44	0.670471	0.636285	0.971725	0.973941	33.77	36.76	1.18	-0.01	-0.31	-0.78	-0.44	-0.03	2.21377e+07	1.1793e+07	2.71735e+07	54.12	39.36	20.21	5.05768e+07	2.21377e+07	2.06959e+07	1.05509e+07	1.1793e+07	2.09532e+07	1.39845e+07	1.48383e+07	2.03508e+07	2.31028e+07	3.11339e+07	3.43615e+07
FALSE	High	Master Protein	TGGT1_207430-t26_1-p1	transcript=TGGT1_207430-t26_1 | gene=TGGT1_207430 | organism=Toxoplasma_gondii_GT1 | gene_product=Putative ATP-dependent RNA helicase DDX1 [Source:UniProtKB/TrEMBL;Acc:S7VSK0] | transcript_product=putative ATP-dependent RNA helicase DDX1 | location=TGGT1_chrIb:63668-75411(+) | protein_length=768 | sequence_SO=chromosome | SO=protein_coding_gene | is_pseudo=false	0	33.266	16	10	30	10	768	82.7	7.31	15.53	10	1.868	0.697	0.9	-0.52	0.146969	0.539884	0.633461	0.962677	7.66	31.39	0.97	0.9	0.43	-0.52	0.01	-0.8	2.51931e+06	1.11703e+06	1.1944e+06	10.91	23.13	9.89	2.70451e+06	2.51931e+06	2.17456e+06	749829	1.11703e+06	1.18916e+06	529536	1.1944e+06	742086	1.13169e+06	1.66058e+06	2.56834e+06
FALSE	High	Master Protein	TGGT1_248340-t26_1-p1	transcript=TGGT1_248340-t26_1 | gene=TGGT1_248340 | organism=Toxoplasma_gondii_GT1 | gene_product=GTP-binding nuclear protein [Source:UniProtKB/TrEMBL;Acc:S7V0L0] | transcript_product=GTP-binding nuclear protein ran/tc4 | location=TGGT1_chrXII:3749189-3752256(+) | protein_length=229 | sequence_SO=chromosome | SO=protein_coding_gene | is_pseudo=false	0	33.168	34	6	31	6	229	26	8.65	42.2	6	0.883	0.236	-0.18	-2.08	0.445862	0.000464982	0.949873	0.00614386	22.52	19.57	-0.77	0.06	-0.18	-2.08	-2.35	-1.88	2.55272e+06	579773	2.9446e+06	20.74	7.12	7.55	2.01252e+06	3.06799e+06	2.55272e+06	650712	573761	579773	694816	786781	1.37749e+06	2.93591e+06	3.34211e+06	4.05743e+06
FALSE	High	Master Protein	TGGT1_213050-t26_1-p1	transcript=TGGT1_213050-t26_1 | gene=TGGT1_213050 | organism=Toxoplasma_gondii_GT1 | gene_product=hypothetical protein | transcript_product=hypothetical protein | location=TGGT1_chrV:689391-689969(+) | protein_length=192 | sequence_SO=chromosome | SO=protein_coding_gene | is_pseudo=false	0	33.072	29	5	93	5	192	21.2	10.23	188.14	5	0.953	1.165	-0.07	0.22	0.591363	0.449718	0.971725	0.924827	3.02	4.03	-0.04	-0.82	-0.07	0.26	0.22	0.02	7.58731e+06	1.02822e+07	9.23541e+06	11.35	24.11	18.62	8.05665e+06	6.43342e+06	7.58731e+06	1.02822e+07	1.14983e+07	7.02148e+06	9.21158e+06	1.01951e+07	6.73439e+06	9.26872e+06	9.69449e+06	1.10612e+07
FALSE	High	Master Protein	TGGT1_293630-t26_1-p1	transcript=TGGT1_293630-t26_1 | gene=TGGT1_293630 | organism=Toxoplasma_gondii_GT1 | gene_product=C2H2-type domain-containing protein [Source:UniProtKB/TrEMBL;Acc:S7UIR1] | transcript_product=hypothetical protein | location=TGGT1_chrIa:450631-460815(-) | protein_length=811 | sequence_SO=chromosome | SO=protein_coding_gene | is_pseudo=false	0	32.617	13	11	31	11	811	89.5	6.11	23.17	11	0.911	0.952	-0.13	-0.07	0.502524	0.828889	0.951523	0.987776	40.47	8.09	0.33	-0.13	-0.78	-0.07	0.01	-0.54	1.48093e+06	1.63134e+06	1.72316e+06	30.86	6.81	16.86	2.40596e+06	1.48093e+06	1.43601e+06	1.63134e+06	1.75313e+06	1.53035e+06	1.72316e+06	1.50399e+06	2.20827e+06	1.66182e+06	1.68388e+06	2.25331e+06
FALSE	High	Master Protein	TGGT1_241240-t26_1-p1	transcript=TGGT1_241240-t26_1 | gene=TGGT1_241240 | organism=Toxoplasma_gondii_GT1 | gene_product=hypothetical protein | transcript_product=hypothetical protein | location=TGGT1_chrVI:1657567-1659295(+) | protein_length=474 | sequence_SO=chromosome | SO=protein_coding_gene | is_pseudo=false	0	32.599	22	8	45	8	474	52.8	10.08	49.91	8	1.015	0.361	0.02	-1.47	0.724466	0.017962	0.981806	0.149251	7.89	25.69	-0.06	0.16	0.02	-1.47	-1.2	-2.09	5.11889e+06	2.10042e+06	5.78881e+06	6.87	39.84	4.19	5.2178e+06	5.11889e+06	4.58267e+06	2.10042e+06	2.28012e+06	969533	1.96517e+06	1.95376e+06	1.29752e+06	5.78881e+06	6.15183e+06	6.82192e+06
FALSE	High	Master Protein	TGGT1_227990-t26_1-p1	transcript=TGGT1_227990-t26_1 | gene=TGGT1_227990 | organism=Toxoplasma_gondii_GT1 | gene_product=hypothetical protein | transcript_product=hypothetical protein | location=TGGT1_chrX:593180-598760(+) | protein_length=900 | sequence_SO=chromosome | SO=protein_coding_gene | is_pseudo=false	0	32.162	13	9	40	9	900	98.6	9.44	34.1	9	1.019	0.736	0.03	-0.44	0.733406	0.639948	0.981806	0.973941	30.35	8.14	-0.32	0.3	0.03	-0.22	-0.44	-0.52	3.43409e+06	3.08392e+06	4.09005e+06	15.1	47.5	6.83	3.00099e+06	3.43409e+06	4.05132e+06	2.99625e+06	3.08392e+06	6.4854e+06	4.09005e+06	2.51301e+06	4.25927e+06	5.06611e+06	4.49241e+06	4.99813e+06
FALSE	High	Master Protein	TGGT1_239100-t26_1-p1	transcript=TGGT1_239100-t26_1 | gene=TGGT1_239100 | organism=Toxoplasma_gondii_GT1 | gene_product=40S ribosomal protein S7 [Source:UniProtKB/TrEMBL;Acc:A0A125YZ18] | transcript_product=ribosomal protein RPS7 | location=TGGT1_chrVI:457170-458270(+) | protein_length=196 | sequence_SO=chromosome | SO=protein_coding_gene | is_pseudo=false	0	32.158	40	7	65	7	196	22.6	9.86	169.65	7	1.13	1.026	0.18	0.04	0.972093	0.6768	0.995562	0.973941	1.75	6.6	0.16	0.73	0.18	0.04	-0.03	0.22	6.39504e+06	6.69703e+06	5.22571e+06	13.21	20.84	5.53	6.3727e+06	7.96506e+06	6.39504e+06	6.69703e+06	5.06126e+06	7.75048e+06	8.51543e+06	5.41984e+06	9.57536e+06	4.32973e+06	5.22571e+06	5.24032e+06
FALSE	High	Master Protein	TGGT1_226380-t26_1-p1	transcript=TGGT1_226380-t26_1 | gene=TGGT1_226380 | organism=Toxoplasma_gondii_GT1 | gene_product=hypothetical protein | transcript_product=hypothetical protein | location=TGGT1_chrX:1583226-1584362(+) | protein_length=378 | sequence_SO=chromosome | SO=protein_coding_gene | is_pseudo=false	0	32.029	28	8	51	8	378	42.6	9.26	52.55	8	1.637	1.247	0.71	0.32	0.289104	0.349642	0.885998	0.883421	6.61	37.66	0.86	0.71	0.64	0.32	0.64	-0.61	4.1787e+06	2.90722e+06	2.50235e+06	7.08	44.15	15.04	4.27745e+06	4.1787e+06	3.73726e+06	2.90722e+06	3.9667e+06	1.50769e+06	1.95796e+06	2.73092e+06	1.57873e+06	2.82899e+06	3.22099e+06	4.58894e+06
FALSE	High	Master Protein	TGGT1_248270-t26_1-p1	transcript=TGGT1_248270-t26_1 | gene=TGGT1_248270 | organism=Toxoplasma_gondii_GT1 | gene_product=Zinc finger (CCCH type) motif-containing protein [Source:UniProtKB/TrEMBL;Acc:S7WGM1] | transcript_product=zinc finger (CCCH type) motif-containing protein | location=TGGT1_chrXII:3703436-3706196(+) | protein_length=818 | sequence_SO=chromosome | SO=protein_coding_gene | is_pseudo=false	0	31.514	14	10	68	10	818	87.6	8.16	57.55	10	1.182	0.518	0.24	-0.95	0.922542	0.160616	0.995562	0.657139	22.34	7.05	0.56	0.24	0.01	-0.95	-0.88	-1.2	4.09629e+06	1.72333e+06	4.07436e+06	13.49	10.21	8.05	4.67532e+06	3.5663e+06	4.09629e+06	1.75662e+06	1.72333e+06	1.45068e+06	1.7374e+06	1.81954e+06	1.44457e+06	4.0389e+06	4.07436e+06	4.64879e+06
FALSE	High	Master Protein	TGGT1_269980-t26_1-p1	transcript=TGGT1_269980-t26_1 | gene=TGGT1_269980 | organism=Toxoplasma_gondii_GT1 | gene_product=Plug_translocon domain-containing protein [Source:UniProtKB/TrEMBL;Acc:A0A125YSW3] | transcript_product=putative preprotein translocase Sec61 | location=TGGT1_chrVIII:5481592-5486135(-) | protein_length=473 | sequence_SO=chromosome | SO=protein_coding_gene | is_pseudo=false	0	31.28	17	10	103	10	473	52.1	8.81	131.25	10	0.875	1.053	-0.19	0.07	0.429528	0.627955	0.949873	0.973941	4.17	24.9	0.36	-0.19	-0.23	0.07	0.3	-0.48	1.18861e+07	1.20096e+07	1.26912e+07	14.3	17.06	11.53	1.38785e+07	1.04418e+07	1.18861e+07	1.20096e+07	1.36473e+07	9.65352e+06	1.26912e+07	1.01224e+07	1.2495e+07	1.23658e+07	1.42134e+07	1.54166e+07
FALSE	High	Master Protein	TGGT1_240090-t26_1-p1	transcript=TGGT1_240090-t26_1 | gene=TGGT1_240090 | organism=Toxoplasma_gondii_GT1 | gene_product=Protein kinase domain-containing protein [Source:UniProtKB/TrEMBL;Acc:S7UR61] | transcript_product=putative rhoptry kinase family protein ROP34 | location=TGGT1_chrVI:1050567-1052967(+) | protein_length=553 | sequence_SO=chromosome | SO=protein_coding_gene | is_pseudo=false	0	31.208	22	9	48	9	553	61.6	6.74	56.35	9	1.463	1.35	0.55	0.43	0.466218	0.250719	0.949873	0.805099	1.16	1.91	0.55	0.54	0.69	0.45	0.43	-0.2	2.76564e+06	2.03442e+06	1.74735e+06	10.49	32.18	18.46	2.76564e+06	2.32722e+06	2.84118e+06	2.52619e+06	2.03442e+06	1.28175e+06	2.11211e+06	1.74735e+06	1.4537e+06	2.10578e+06	1.99521e+06	2.2147e+06
FALSE	High	Master Protein	TGGT1_274060-t26_1-p1	transcript=TGGT1_274060-t26_1 | gene=TGGT1_274060 | organism=Toxoplasma_gondii_GT1 | gene_product=2-oxoglutarate/malate translocase OMT [Source:UniProtKB/TrEMBL;Acc:S7V4E3] | transcript_product=2-oxoglutarate/malate translocase OMT | location=TGGT1_chrVIII:3043521-3046134(+) | protein_length=323 | sequence_SO=chromosome | SO=protein_coding_gene | is_pseudo=false	0	30.966	26	9	73	9	323	35	9.77	95.8	9	0.795	1.191	-0.33	0.25	0.282447	0.416031	0.885993	0.920068	3.24	38.38	-0.33	-0.36	-0.13	0.92	0.25	-0.18	5.15702e+06	7.51769e+06	6.3216e+06	10.56	36.22	7.88	4.54783e+06	5.15702e+06	5.62383e+06	1.07816e+07	7.51769e+06	5.14395e+06	5.56776e+06	7.20624e+06	6.46511e+06	4.45321e+06	4.9224e+06	6.08167e+06
FALSE	High	Master Protein	TGGT1_228150-t26_1-p1	transcript=TGGT1_228150-t26_1 | gene=TGGT1_228150 | organism=Toxoplasma_gondii_GT1 | gene_product=hypothetical protein | transcript_product=hypothetical protein | location=TGGT1_chrX:450432-458115(+) | protein_length=2115 | sequence_SO=chromosome | SO=protein_coding_gene | is_pseudo=false	0	30.965	6	10	28	10	2115	214.4	9.09	10.95	10	1.17	0.77	0.23	-0.38	0.946552	0.727668	0.995562	0.976829	23.2	2.19	0.7	0.23	-0.02	-0.38	-0.36	-0.93	1.33055e+06	549865	931416	19.56	19.21	12.04	1.52192e+06	1.02145e+06	1.33055e+06	691103	549865	474756	595818	538307	632874	1.19817e+06	1.00593e+06	1.79133e+06
FALSE	High	Master Protein	TGGT1_220950-t26_1-p1	transcript=TGGT1_220950-t26_1 | gene=TGGT1_220950 | organism=Toxoplasma_gondii_GT1 | gene_product=hypothetical protein | transcript_product=hypothetical protein | location=TGGT1_chrII:72817-74397(+) | protein_length=334 | sequence_SO=chromosome | SO=protein_coding_gene | is_pseudo=false	0	30.937	30	7	73	4	334	35.6	5.25	89.83	7	1.035	1.204	0.05	0.27	0.769571	0.399855	0.995562	0.913604	13.29	24.97	0.05	-0.13	0.17	0.49	0.27	-0.47	3.78621e+06	4.384e+06	3.22017e+06	11.48	30.62	12.22	3.78621e+06	3.37521e+06	4.24798e+06	4.77412e+06	4.384e+06	2.53896e+06	2.9945e+06	3.65528e+06	2.86322e+06	3.45683e+06	4.19259e+06	4.52521e+06
FALSE	High	Master Protein	TGGT1_221970-t26_1-p1	transcript=TGGT1_221970-t26_1 | gene=TGGT1_221970 | organism=Toxoplasma_gondii_GT1 | gene_product=hypothetical protein | transcript_product=hypothetical protein | location=TGGT1_chrII:713954-715277(-) | protein_length=228 | sequence_SO=chromosome | SO=protein_coding_gene | is_pseudo=false	0	30.892	39	7	51	7	228	25.3	9.7	62.99	7	1.198	0.696	0.26	-0.52	0.890322	0.536518	0.995562	0.960964	25.31	16.61	-0.01	0.77	0.26	-0.52	-0.68	0.57	3.8455e+06	2.35752e+06	2.95584e+06	13.9	55.58	9.78	3.8455e+06	4.72336e+06	3.66328e+06	2.35752e+06	1.56168e+06	4.60775e+06	3.43166e+06	2.21419e+06	4.51706e+06	2.71481e+06	2.74555e+06	2.95584e+06
FALSE	High	Master Protein	TGGT1_230190-t26_1-p1	transcript=TGGT1_230190-t26_1 | gene=TGGT1_230190 | organism=Toxoplasma_gondii_GT1 | gene_product=hypothetical protein | transcript_product=hypothetical protein | location=TGGT1_chrVIII:671191-672375(+) | protein_length=290 | sequence_SO=chromosome | SO=protein_coding_gene | is_pseudo=false	0	30.723	42	8	44	8	290	31.2	10.37	24.14	8	0.921	0.764	-0.12	-0.39	0.522271	0.71249	0.951523	0.973941	23.44	0.46	-0.51	0.13	-0.12	-0.39	-0.39	-0.23	2.45903e+06	2.17087e+06	2.70175e+06	21.65	5.9	10.73	1.89643e+06	2.94983e+06	2.45903e+06	2.19572e+06	1.96874e+06	2.17087e+06	2.70175e+06	2.16033e+06	2.11623e+06	2.57742e+06	2.73512e+06	2.98147e+06
FALSE	High	Master Protein	TGGT1_299050-t26_1-p1	transcript=TGGT1_299050-t26_1 | gene=TGGT1_299050 | organism=Toxoplasma_gondii_GT1 | gene_product=Ribosomal protein RPL17 [Source:UniProtKB/TrEMBL;Acc:A0A125YQZ7] | transcript_product=ribosomal protein RPL17 | location=TGGT1_chrIII:2205438-2207707(-) | protein_length=195 | sequence_SO=chromosome | SO=protein_coding_gene | is_pseudo=false	0	30.302	32	6	40	6	195	22.3	10.17	31.29	6	1.48	0.704	0.57	-0.51	0.445318	0.557791	0.949873	0.962677	54.72	2.16	1.22	0.57	-0.1	-1.23	-0.51	-0.48	5.48025e+06	1.95178e+06	3.68615e+06	52.53	49.72	30.7	1.0312e+07	5.48025e+06	3.71392e+06	1.13545e+06	1.95178e+06	3.20608e+06	1.23606e+06	2.29375e+06	2.72573e+06	3.07133e+06	4.41166e+06	5.48199e+06
FALSE	High	Master Protein	TGGT1_291330-t26_1-p1	transcript=TGGT1_291330-t26_1 | gene=TGGT1_291330 | organism=Toxoplasma_gondii_GT1 | gene_product=RRM domain-containing protein [Source:UniProtKB/TrEMBL;Acc:A0A125YM75] | transcript_product=RNA recognition motif-containing protein | location=TGGT1_chrIX:4055101-4057671(+) | protein_length=228 | sequence_SO=chromosome | SO=protein_coding_gene | is_pseudo=false	0	29.821	34	8	59	8	228	25.5	10.51	63.85	8	1.105	0.575	0.14	-0.8	0.920569	0.25984	0.995562	0.812006	26.83	10.58	0.14	0.39	-0.14	-1.16	-0.69	-0.8	4.75074e+06	2.78403e+06	4.33758e+06	8.66	24.39	18.53	5.40862e+06	4.60978e+06	4.75074e+06	1.86264e+06	2.78403e+06	3.05864e+06	2.45457e+06	2.33091e+06	2.51406e+06	4.02271e+06	4.33758e+06	5.65439e+06
FALSE	High	Master Protein	TGGT1_308580-t26_1-p1	transcript=TGGT1_308580-t26_1 | gene=TGGT1_308580 | organism=Toxoplasma_gondii_GT1 | gene_product=Lon protease homolog [Source:UniProtKB/TrEMBL;Acc:S7US17] | transcript_product=Lon protease family protein | location=TGGT1_chrXI:217235-229804(+) | protein_length=1498 | sequence_SO=chromosome | SO=protein_coding_gene | is_pseudo=false	0	29.714	7	9	22	9	1498	164.1	7.72	18.7	9	0.973	0.727	-0.04	-0.46	0.634489	0.616902	0.971725	0.973941	12.34	2.11	0.14	-0.04	-0.15	-0.46	-0.2	-0.48	1.57184e+06	968272	1.43813e+06	19.24	8.74	8.8	1.84735e+06	1.2493e+06	1.57184e+06	968272	910824	1.08041e+06	985172	1.04568e+06	1.24943e+06	1.70186e+06	1.94352e+06	2.26251e+06
FALSE	High	Master Protein	TGGT1_222170-t26_1-p1	transcript=TGGT1_222170-t26_1 | gene=TGGT1_222170 | organism=Toxoplasma_gondii_GT1 | gene_product=Dense-granule antigen DG32 [Source:UniProtKB/TrEMBL;Acc:A0A125YI16] | transcript_product=dense-granule antigen DG32 | location=TGGT1_chrII:911318-912642(+) | protein_length=300 | sequence_SO=chromosome | SO=protein_coding_gene | is_pseudo=false	0	29.62	24	7	50	7	300	33.6	9.38	52.98	7	1.041	1.327	0.06	0.41	0.781433	0.270515	0.995562	0.818481	9.67	1	-0.04	0.85	0.06	0.41	0.42	0.18	2.94234e+06	2.81189e+06	2.59388e+06	22.57	29.22	11.74	2.94234e+06	4.14099e+06	2.78341e+06	2.81189e+06	4.1451e+06	2.4016e+06	1.87367e+06	3.00952e+06	2.1418e+06	2.1151e+06	2.62898e+06	2.94614e+06
FALSE	High	Master Protein	TGGT1_253090-t26_1-p1	transcript=TGGT1_253090-t26_1 | gene=TGGT1_253090 | organism=Toxoplasma_gondii_GT1 | gene_product=DEAD/DEAH box helicase domain-containing protein [Source:UniProtKB/TrEMBL;Acc:S7UMF0] | transcript_product=DEAD/DEAH box helicase domain-containing protein | location=TGGT1_chrIII:713146-720750(+) | protein_length=655 | sequence_SO=chromosome | SO=protein_coding_gene | is_pseudo=false	0	29.499	17	9	52	9	655	72	9.83	36.06	9	1.035	0.652	0.05	-0.62	0.767598	0.428265	0.995562	0.924827	29.81	20	-0.27	0.57	0.05	-0.62	-0.8	-0.28	2.29708e+06	1.43192e+06	2.21475e+06	23.59	26.52	10.37	2.29708e+06	3.06945e+06	1.94542e+06	1.58676e+06	921220	1.43192e+06	2.20052e+06	1.14008e+06	1.57459e+06	2.25101e+06	2.21475e+06	2.24334e+06
FALSE	High	Master Protein	TGGT1_289550-t26_1-p1	transcript=TGGT1_289550-t26_1 | gene=TGGT1_289550 | organism=Toxoplasma_gondii_GT1 | gene_product=WD_REPEATS_REGION domain-containing protein [Source:UniProtKB/TrEMBL;Acc:A0A125YPU8] | transcript_product=WD domain, G-beta repeat-containing protein | location=TGGT1_chrIX:3105816-3110675(-) | protein_length=530 | sequence_SO=chromosome | SO=protein_coding_gene | is_pseudo=false	0	29.486	23	8	30	8	530	57.3	4.91	27.17	8	0.9	0.571	-0.15	-0.81	0.478544	0.252392	0.951523	0.807255	20.03	3.46	-0.51	0.06	-0.15	-0.81	-0.84	-0.21	1.53589e+06	969139	1.96307e+06	11.09	42.08	5.34	1.44459e+06	1.78508e+06	1.53589e+06	969139	895580	1.82693e+06	1.93066e+06	1.2083e+06	2.29838e+06	1.77988e+06	1.96307e+06	2.13059e+06
FALSE	High	Master Protein	TGGT1_316400B-t26_1-p1	transcript=TGGT1_316400B-t26_1 | gene=TGGT1_316400B | organism=Toxoplasma_gondii_GT1 | gene_product=Tubulin alpha chain [Source:UniProtKB/TrEMBL;Acc:S7UL74] | transcript_product=alpha tubulin TUBA1 | location=TGGT1_chrXI:5219470-5220918(+) | protein_length=432 | sequence_SO=chromosome | SO=protein_coding_gene | is_pseudo=false	0	29.256	20	7	31	7	432	47.8	5.05	18.32	7	1.241	1.95	0.31	0.96	0.808746	0.0333428	0.995562	0.23574	5.14	64.77	0.31	0.26	0.51	0.96	0.14	1.89	845688	1.25552e+06	769031	23.93	66.13	17.28	845688	842530	1.24995e+06	1.25552e+06	802800	2.86915e+06	883079	1.29862e+06	1.616e+06	639101	769031	905666
FALSE	High	Master Protein	TGGT1_262960-t26_1-p1	transcript=TGGT1_262960-t26_1 | gene=TGGT1_262960 | organism=Toxoplasma_gondii_GT1 | gene_product=Putative U1 snRNP-associated protein Usp106 [Source:UniProtKB/TrEMBL;Acc:A0A125YMZ9] | transcript_product=putative U1 snRNP-associated protein Usp106 | location=TGGT1_chrVIIb:870974-873912(+) | protein_length=394 | sequence_SO=chromosome | SO=protein_coding_gene | is_pseudo=false	0	28.846	20	6	23	6	394	44.7	9.86	18.35	6	1.355	1.102	0.44	0.14	0.615185	0.543377	0.971725	0.962677	50.18	37.17	0.44	0.9	-0.16	0.14	-0.28	0.98	1.85208e+06	1.14013e+06	1.14035e+06	41.55	42.9	11.95	1.85208e+06	2.59893e+06	1.06982e+06	1.14013e+06	1.13227e+06	2.25831e+06	1.33825e+06	1.31211e+06	2.3912e+06	965512	842919	1.14035e+06
FALSE	High	Master Protein	TGGT1_218820-t26_1-p1	transcript=TGGT1_218820-t26_1 | gene=TGGT1_218820 | organism=Toxoplasma_gondii_GT1 | gene_product=Alba domain-containing protein [Source:UniProtKB/TrEMBL;Acc:A0A125YFQ6] | transcript_product=alba 2 | location=TGGT1_chrXII:1217304-1219105(+) | protein_length=148 | sequence_SO=chromosome | SO=protein_coding_gene | is_pseudo=false	0	28.799	43	6	54	6	148	15.4	8.43	75.85	6	1.162	0.346	0.22	-1.53	0.961015	0.0132156	0.995562	0.118353	8.63	23.59	0.3	0.22	-0.59	-2.16	-1.28	-1.53	6.44531e+06	1.93174e+06	6.00049e+06	7.81	23.14	30.21	7.25888e+06	6.28944e+06	6.44531e+06	1.32145e+06	1.93174e+06	2.11032e+06	1.45322e+06	1.59267e+06	2.08322e+06	6.00049e+06	6.87182e+06	1.09603e+07
FALSE	High	Master Protein	TGGT1_263700-t26_1-p1	transcript=TGGT1_263700-t26_1 | gene=TGGT1_263700 | organism=Toxoplasma_gondii_GT1 | gene_product=Ribosomal protein RPS14 [Source:UniProtKB/TrEMBL;Acc:S7W6D1] | transcript_product=ribosomal protein RPS14 | location=TGGT1_chrVIIb:359504-361231(+) | protein_length=156 | sequence_SO=chromosome | SO=protein_coding_gene | is_pseudo=false	0	28.555	57	5	29	5	156	16.3	10.36	42.83	5	0.659	1.176	-0.6	0.23	0.103104	0.435631	0.52931	0.924827	10.13	32.84	-0.28	-0.6	-0.7	0.55	-0.13	0.23	2.28384e+06	3.16726e+06	3.11918e+06	27.61	19.45	22.8	2.82612e+06	1.59502e+06	2.28384e+06	3.97979e+06	2.71777e+06	3.16726e+06	4.15446e+06	3.11918e+06	4.67944e+06	2.06513e+06	2.41328e+06	2.39328e+06
FALSE	High	Master Protein	TGGT1_286730-t26_1-p1	transcript=TGGT1_286730-t26_1 | gene=TGGT1_286730 | organism=Toxoplasma_gondii_GT1 | gene_product=SRP19 protein [Source:UniProtKB/TrEMBL;Acc:S7UNZ1] | transcript_product=SRP19 protein | location=TGGT1_chrV:1559363-1561350(-) | protein_length=222 | sequence_SO=chromosome | SO=protein_coding_gene | is_pseudo=false	0	28.4	34	6	42	6	222	24	9.86	74.91	6	1.127	0.607	0.17	-0.72	0.966958	0.326532	0.995562	0.875727	12.86	4.38	-0.18	0.17	0.29	-0.72	-0.76	-0.45	4.19648e+06	2.16186e+06	3.54944e+06	9.9	4.2	17.17	3.54242e+06	4.25551e+06	4.19648e+06	2.29487e+06	2.11816e+06	2.16186e+06	3.54944e+06	2.64998e+06	3.01052e+06	3.50389e+06	4.24426e+06	4.40757e+06
FALSE	High	Master Protein	TGGT1_231960-t26_1-p1	transcript=TGGT1_231960-t26_1 | gene=TGGT1_231960 | organism=Toxoplasma_gondii_GT1 | gene_product=Putative omega secalin [Source:UniProtKB/TrEMBL;Acc:S7WBR2] | transcript_product=putative omega secalin | location=TGGT1_chrVIII:1668838-1672885(-) | protein_length=1111 | sequence_SO=chromosome | SO=protein_coding_gene | is_pseudo=false	0	28.375	7	5	31	5	1111	119.6	8.98	27.44	5	1.28	0.706	0.36	-0.5	0.738444	0.562239	0.981806	0.962677	1.7	39.84	0.36	0.37	-0.01	-0.05	-0.5	-1.37	2.63699e+06	1.21832e+06	2.4223e+06	10.14	28.02	12.13	2.63699e+06	2.22517e+06	2.69284e+06	1.21832e+06	1.41496e+06	789811	1.10566e+06	1.3698e+06	1.10708e+06	2.22105e+06	2.4223e+06	2.84605e+06
FALSE	High	Master Protein	TGGT1_235930-t26_1-p1	transcript=TGGT1_235930-t26_1 | gene=TGGT1_235930 | organism=Toxoplasma_gondii_GT1 | gene_product=Domain K-type RNA binding proteins family protein [Source:UniProtKB/TrEMBL;Acc:A0A125YQ53] | transcript_product=domain K- type RNA binding proteins family protein | location=TGGT1_chrX:5075263-5081044(+) | protein_length=570 | sequence_SO=chromosome | SO=protein_coding_gene | is_pseudo=false	0	28.309	21	8	44	8	570	64.2	9.94	38.1	8	1.334	0.7	0.42	-0.51	0.648124	0.547629	0.971725	0.962677	22.77	1.11	0.18	0.94	0.42	-0.51	-0.52	-0.12	2.27954e+06	1.06349e+06	2.01311e+06	23.6	24.65	8.94	2.27954e+06	3.20913e+06	2.09653e+06	1.06349e+06	932223	1.47925e+06	1.55607e+06	1.06455e+06	1.30287e+06	2.01311e+06	2.11263e+06	2.26732e+06
FALSE	High	Master Protein	TGGT1_261570-t26_1-p1	transcript=TGGT1_261570-t26_1 | gene=TGGT1_261570 | organism=Toxoplasma_gondii_GT1 | gene_product=60S ribosomal protein L7a [Source:UniProtKB/TrEMBL;Acc:A0A125YW74] | transcript_product=ribosomal protein RPL7A | location=TGGT1_chrVIIb:1628077-1630958(+) | protein_length=276 | sequence_SO=chromosome | SO=protein_coding_gene | is_pseudo=false	0	28.182	26	7	31	7	276	31	10.45	46.41	7	1.268	0.642	0.34	-0.64	0.760197	0.405639	0.995562	0.920068	51.8	0.8	0.87	0.34	-0.28	-0.91	-0.63	-0.64	2.6994e+06	1.21789e+06	2.47633e+06	66.7	29.55	17.93	7.54985e+06	2.6994e+06	2.54763e+06	1.12339e+06	1.21789e+06	1.88749e+06	1.27432e+06	1.6004e+06	2.12367e+06	2.47633e+06	2.60003e+06	3.57987e+06
FALSE	High	Master Protein	TGGT1_313390-t26_1-p1	transcript=TGGT1_313390-t26_1 | gene=TGGT1_313390 | organism=Toxoplasma_gondii_GT1 | gene_product=Ribosomal protein RPL6 [Source:UniProtKB/TrEMBL;Acc:S7UT72] | transcript_product=ribosomal protein RPL6 | location=TGGT1_chrXI:3299999-3300967(+) | protein_length=322 | sequence_SO=chromosome | SO=protein_coding_gene | is_pseudo=false	0	28.12	18	7	43	7	322	36.3	10.78	58.37	7	1.094	0.556	0.13	-0.85	0.895446	0.223274	0.995562	0.770029	44.34	14.01	0.77	0.13	-0.38	-0.85	-0.99	-0.7	4.26502e+06	2.38943e+06	4.35763e+06	31.77	24.71	16.99	7.01227e+06	4.26502e+06	4.118e+06	2.38943e+06	1.98326e+06	3.20927e+06	2.68233e+06	2.42159e+06	4.44237e+06	4.25612e+06	4.35763e+06	5.70942e+06
FALSE	High	Master Protein	TGGT1_247440-t26_1-p1	transcript=TGGT1_247440-t26_1 | gene=TGGT1_247440 | organism=Toxoplasma_gondii_GT1 | gene_product=hypothetical protein | transcript_product=hypothetical protein | location=TGGT1_chrXII:3270269-3271405(-) | protein_length=378 | sequence_SO=chromosome | SO=protein_coding_gene | is_pseudo=false	0	27.922	24	6	21	6	378	40.1	9.66	17.58	6	1.125	1.489	0.17	0.57	0.961254	0.158797	0.995562	0.657139	5.16	3.28	0.67	0.12	0.17	0.57	0.61	-0.55	2.28235e+06	2.21385e+06	1.53168e+06	13.99	46.36	27.34	2.47037e+06	1.86722e+06	2.28235e+06	2.21385e+06	2.47225e+06	872147	1.33453e+06	1.47485e+06	759285	2.18472e+06	2.21514e+06	2.29056e+06
FALSE	High	Master Protein	TGGT1_306195-t26_1-p1	transcript=TGGT1_306195-t26_1 | gene=TGGT1_306195 | organism=Toxoplasma_gondii_GT1 | gene_product=hypothetical protein | transcript_product=hypothetical protein | location=TGGT1_chrIX:5606455-5607689(-) | protein_length=236 | sequence_SO=chromosome | SO=protein_coding_gene | is_pseudo=false	0	27.433	24	5	45	5	236	25.6	9.77	91.04	5	0.881	0.809	-0.18	-0.3	0.441529	0.829618	0.949873	0.987776	29.16	0.26	-0.56	0.13	-0.18	-0.13	-0.31	-0.3	3.02351e+06	3.09835e+06	3.48027e+06	22.44	12.29	6.69	2.93528e+06	4.30745e+06	3.02351e+06	3.34989e+06	3.09835e+06	2.61859e+06	4.76378e+06	4.38815e+06	3.75187e+06	3.48027e+06	3.10702e+06	3.51214e+06
FALSE	High	Master Protein	TGGT1_240640-t26_1-p1	transcript=TGGT1_240640-t26_1 | gene=TGGT1_240640 | organism=Toxoplasma_gondii_GT1 | gene_product=Protein kinase domain-containing protein [Source:UniProtKB/TrEMBL;Acc:A0A125YXS9] | transcript_product=casein kinase I | location=TGGT1_chrVI:1321734-1325141(+) | protein_length=324 | sequence_SO=chromosome | SO=protein_coding_gene | is_pseudo=false	0	27.218	19	6	55	6	324	37.9	9.13	47.17	6	1.05	1.108	0.07	0.15	0.800371	0.534994	0.995562	0.960964	5.97	2.57	0.01	0.2	0.07	0.12	0.25	0.15	2.57771e+06	2.34515e+06	2.23685e+06	15.4	3.15	2.45	2.02045e+06	2.57771e+06	2.73762e+06	2.34515e+06	2.24699e+06	2.3904e+06	2.35181e+06	2.18496e+06	2.2947e+06	1.97672e+06	2.36529e+06	2.57473e+06
FALSE	High	Master Protein	TGGT1_252430-t26_1-p1	transcript=TGGT1_252430-t26_1 | gene=TGGT1_252430 | organism=Toxoplasma_gondii_GT1 | gene_product=hypothetical protein | transcript_product=hypothetical protein | location=TGGT1_chrIII:551384-554261(+) | protein_length=767 | sequence_SO=chromosome | SO=protein_coding_gene | is_pseudo=false	0	27.077	14	9	21	9	767	83.8	6.15	7.02	9	1.199	0.546	0.26	-0.87	0.888943	0.205648	0.995562	0.736079	14.79	27.58	0.26	0.72	0.11	-1.49	-0.87	-0.58	1.51467e+06	637869	1.53378e+06	12.97	11.1	22.02	1.51467e+06	1.87954e+06	1.50982e+06	577609	637869	720277	670431	748561	564768	1.69427e+06	1.72061e+06	1.84716e+06
FALSE	High	Master Protein	TGGT1_320050-t26_1-p1	transcript=TGGT1_320050-t26_1 | gene=TGGT1_320050 | organism=Toxoplasma_gondii_GT1 | gene_product=Ribosomal_L18_c domain-containing protein [Source:UniProtKB/TrEMBL;Acc:A0A125YYH7] | transcript_product=ribosomal protein RPL5 | location=TGGT1_chrIV:494655-497683(+) | protein_length=310 | sequence_SO=chromosome | SO=protein_coding_gene | is_pseudo=false	0	27.059	21	6	51	6	310	35.3	9.88	42.92	6	1.175	0.663	0.23	-0.59	0.936279	0.454192	0.995562	0.924827	39.91	10.7	0.95	0.23	-0.22	-0.59	-0.69	-0.38	3.29058e+06	1.52895e+06	2.70914e+06	34.98	31.54	26.86	5.61066e+06	3.29058e+06	3.09653e+06	1.52895e+06	1.50263e+06	2.52806e+06	1.65914e+06	1.86279e+06	2.58118e+06	2.70914e+06	3.47635e+06	4.03639e+06
FALSE	High	Master Protein	TGGT1_225550-t26_1-p1	transcript=TGGT1_225550-t26_1 | gene=TGGT1_225550 | organism=Toxoplasma_gondii_GT1 | gene_product=Phosphatidylserine decarboxylase proenzyme 1, mitochondrial [Source:UniProtKB/Swiss-Prot;Acc:Q1PCQ8] | transcript_product=phosphatidylserine decarboxylase | location=TGGT1_chrX:2075581-2079309(+) | protein_length=427 | sequence_SO=chromosome | SO=protein_coding_gene | is_pseudo=false	0	26.828	17	6	36	6	427	48.4	10.11	31.15	6	0.783	1.186	-0.35	0.25	0.262778	0.421649	0.851439	0.920068	7.01	42.77	-0.42	0.01	-0.35	0.79	0.25	-0.24	1.15928e+06	1.65137e+06	1.36613e+06	7.55	30.93	3.94	1.13808e+06	1.3047e+06	1.15928e+06	2.11915e+06	1.65137e+06	1.11307e+06	1.28417e+06	1.36613e+06	1.19513e+06	1.15085e+06	1.34668e+06	1.38343e+06
FALSE	High	Master Protein	TGGT1_273930-t26_1-p1	transcript=TGGT1_273930-t26_1 | gene=TGGT1_273930 | organism=Toxoplasma_gondii_GT1 | gene_product=SWIB domain-containing protein [Source:UniProtKB/TrEMBL;Acc:S7V4C1] | transcript_product=DNA topoisomerase domain-containing protein | location=TGGT1_chrVIII:3163479-3165871(+) | protein_length=254 | sequence_SO=chromosome | SO=protein_coding_gene | is_pseudo=false	0	26.656	16	4	73	4	254	28	10.3	161.91	4	0.94	1.119	-0.09	0.16	0.562001	0.517576	0.964665	0.960964	0.79	15.59	-0.08	-0.09	-0.47	-0.02	0.16	0.31	5.83807e+06	6.5129e+06	5.98766e+06	30.53	8.37	4.32	7.88841e+06	5.83807e+06	4.24055e+06	5.88251e+06	6.5129e+06	6.95757e+06	5.98766e+06	6.26391e+06	6.7549e+06	4.5917e+06	6.2227e+06	5.70705e+06
FALSE	High	Master Protein	TGGT1_225160-t26_1-p1	transcript=TGGT1_225160-t26_1 | gene=TGGT1_225160 | organism=Toxoplasma_gondii_GT1 | gene_product=hypothetical protein | transcript_product=hypothetical protein | location=TGGT1_chrX:2354594-2355799(+) | protein_length=401 | sequence_SO=chromosome | SO=protein_coding_gene | is_pseudo=false	0	26.299	22	6	28	6	401	45.4	9.25	21.69	6	1.053	1.029	0.07	0.04	0.806927	0.672178	0.995562	0.973941	10.57	24.81	-0.03	0.5	0.07	0.04	0.34	-0.22	1.39933e+06	1.19676e+06	1.1996e+06	20.09	13	7.44	1.05016e+06	1.58129e+06	1.39933e+06	1.19676e+06	1.43669e+06	1.12582e+06	1.16969e+06	1.24782e+06	1.21112e+06	1.16602e+06	1.1996e+06	1.43082e+06
FALSE	High	Master Protein	TGGT1_210360-t26_1-p1	transcript=TGGT1_210360-t26_1 | gene=TGGT1_210360 | organism=Toxoplasma_gondii_GT1 | gene_product=DEAD (Asp-Glu-Ala-Asp) box polypeptide 41 family protein [Source:UniProtKB/TrEMBL;Acc:S7UPR4] | transcript_product=DEAD (Asp-Glu-Ala-Asp) box polypeptide 41 family protein | location=TGGT1_chrIX:4638505-4645559(-) | protein_length=657 | sequence_SO=chromosome | SO=protein_coding_gene | is_pseudo=false	0	26.289	11	6	18	6	657	73.2	6.65	19.43	6	0.94	0.686	-0.09	-0.54	0.563606	0.510946	0.964665	0.959657	8.95	8.25	0.15	-0.17	-0.09	-0.54	-0.62	0.07	890348	599135	919254	11.96	51.12	25.78	890348	781027	993570	599135	478630	1.20427e+06	822237	705585	1.31842e+06	772918	919254	1.25759e+06
FALSE	High	Master Protein	TGGT1_318690-t26_1-p1	transcript=TGGT1_318690-t26_1 | gene=TGGT1_318690 | organism=Toxoplasma_gondii_GT1 | gene_product=RNA recognition motif-containing protein [Source:UniProtKB/TrEMBL;Acc:S7UKD5] | transcript_product=RNA recognition motif-containing protein | location=TGGT1_chrIV:1089256-1092702(+) | protein_length=1148 | sequence_SO=chromosome | SO=protein_coding_gene | is_pseudo=false	0	26.092	10	9	23	9	1148	124.5	9	9.97	9	1.186	0.766	0.25	-0.38	0.913791	0.717383	0.995562	0.973941	34.83	4.59	0.25	0.66	-0.14	-0.54	-0.34	-0.38	1.17834e+06	511170	979500	5.48	16.2	1.16	1.17834e+06	1.18553e+06	1.07327e+06	438519	511170	606001	442253	511015	786829	966594	979500	1.41611e+06
FALSE	High	Master Protein	TGGT1_309120-t26_1-p1	transcript=TGGT1_309120-t26_1 | gene=TGGT1_309120 | organism=Toxoplasma_gondii_GT1 | gene_product=Ribos_L4_asso_C domain-containing protein [Source:UniProtKB/TrEMBL;Acc:A0A125YTR1] | transcript_product=ribosomal protein RPL4 | location=TGGT1_chrXI:476484-477734(-) | protein_length=416 | sequence_SO=chromosome | SO=protein_coding_gene | is_pseudo=false	0	25.836	18	7	28	7	416	45.7	11.18	37.46	7	1.193	0.568	0.25	-0.82	0.899612	0.247015	0.995562	0.800552	48.03	5.28	0.66	0.25	-0.4	-0.82	-0.76	-0.87	4.436e+06	2.16068e+06	4.08468e+06	25.81	17.43	23.14	6.13137e+06	4.436e+06	3.73785e+06	1.66906e+06	2.16068e+06	2.37128e+06	2.56963e+06	2.42497e+06	3.30103e+06	3.58693e+06	4.08468e+06	5.54832e+06
FALSE	High	Master Protein	TGGT1_240860-t26_1-p1	transcript=TGGT1_240860-t26_1 | gene=TGGT1_240860 | organism=Toxoplasma_gondii_GT1 | gene_product=PlsC domain-containing protein [Source:UniProtKB/TrEMBL;Acc:A0A125YWP8] | transcript_product=acyltransferase domain-containing protein | location=TGGT1_chrVI:1452612-1456058(-) | protein_length=281 | sequence_SO=chromosome | SO=protein_coding_gene | is_pseudo=false	0	25.731	30	6	37	6	281	31.8	8.85	20.75	6	1.158	0.933	0.21	-0.1	0.970286	0.870288	0.995562	0.987776	1.86	13.3	0.21	0.17	0.23	-0.1	0.04	-0.56	2.24134e+06	1.81344e+06	1.91733e+06	9.91	21.14	6.93	2.41365e+06	1.97867e+06	2.24134e+06	1.81344e+06	1.86861e+06	1.24193e+06	1.12228e+06	1.70421e+06	1.29426e+06	1.91733e+06	2.31822e+06	2.88544e+06
FALSE	High	Master Protein	TGGT1_256840-t26_1-p1	transcript=TGGT1_256840-t26_1 | gene=TGGT1_256840 | organism=Toxoplasma_gondii_GT1 | gene_product=hypothetical protein | transcript_product=hypothetical protein | location=TGGT1_chrVIIb:4337279-4343791(-) | protein_length=764 | sequence_SO=chromosome | SO=protein_coding_gene | is_pseudo=false	0	25.647	8	4	16	4	764	82.7	8.6	18.81	4	0.932	1.04	-0.1	0.06	0.546287	0.651612	0.956387	0.973941	30.47	8.89	-0.81	0.23	-0.1	0.06	0.14	-0.51	814889	702753	702811	28.95	15.78	12.14	515152	814889	942280	702753	715608	531869	461197	662820	646116	756031	793110	926306
FALSE	High	Master Protein	TGGT1_276210-t26_1-p1	transcript=TGGT1_276210-t26_1 | gene=TGGT1_276210 | organism=Toxoplasma_gondii_GT1 | gene_product=Phosphoglycerate mutase family protein [Source:UniProtKB/TrEMBL;Acc:S7UNF6] | transcript_product=phosphoglycerate mutase family protein | location=TGGT1_chrIII:31225-34235(+) | protein_length=825 | sequence_SO=chromosome | SO=protein_coding_gene | is_pseudo=false	0	25.607	12	9	25	9	825	91.8	9.44	10.11	9	0.828	1.065	-0.27	0.09	0.340462	0.605934	0.938934	0.973941	9.15	3.78	-0.44	-0.27	-0.18	0.09	0.13	-0.04	1.86298e+06	1.84164e+06	1.97749e+06	20.76	7.12	9.89	1.64683e+06	1.86298e+06	2.44337e+06	2.02792e+06	1.76832e+06	1.84164e+06	2.32203e+06	2.17502e+06	1.97749e+06	2.28176e+06	1.89677e+06	3.02296e+06
FALSE	High	Master Protein	TGGT1_263300-t26_1-p1	transcript=TGGT1_263300-t26_1 | gene=TGGT1_263300 | organism=Toxoplasma_gondii_GT1 | gene_product=Eukaryotic porin protein [Source:UniProtKB/TrEMBL;Acc:A0A125YUJ9] | transcript_product=eukaryotic porin protein | location=TGGT1_chrVIIb:618828-622551(-) | protein_length=290 | sequence_SO=chromosome | SO=protein_coding_gene | is_pseudo=false	0	25.535	26	6	12	6	290	31.3	8.94	11.9	6	0.798	0.768	-0.33	-0.38	0.287611	0.722967	0.885998	0.976066	28.01	14.96	-0.63	-0.02	-0.33	-0.52	-0.38	0.71	432875	639841	722693	16.4	26.8	20.86	425605	563756	432875	639841	580226	940332	1.00084e+06	722693	931701	787848	555755	517581
FALSE	High	Master Protein	TGGT1_204410-t26_1-p1	transcript=TGGT1_204410-t26_1 | gene=TGGT1_204410 | organism=Toxoplasma_gondii_GT1 | gene_product=Endonuclease/exonuclease/phosphatase family protein [Source:UniProtKB/TrEMBL;Acc:S7UV63] | transcript_product=endonuclease/exonuclease/phosphatase family protein | location=TGGT1_chrVIIa:1704852-1712452(-) | protein_length=1123 | sequence_SO=chromosome | SO=protein_coding_gene | is_pseudo=false	0	25.032	9	10	29	10	1123	120.5	8.87	20.98	10	1.344	0.963	0.43	-0.05	0.632643	0.805204	0.971725	0.987776	17.88	17.23	0.43	0.7	0.24	-0.29	-0.05	0.12	1.70838e+06	1.24332e+06	1.41393e+06	26.31	24.72	13.06	2.23741e+06	1.70838e+06	1.31779e+06	1.11216e+06	1.24332e+06	1.75294e+06	1.1454e+06	1.41393e+06	1.72341e+06	1.66001e+06	1.67733e+06	2.21688e+06
FALSE	High	Master Protein	TGGT1_247520-t26_1-p1	transcript=TGGT1_247520-t26_1 | gene=TGGT1_247520 | organism=Toxoplasma_gondii_GT1 | gene_product=hypothetical protein | transcript_product=hypothetical protein | location=TGGT1_chrXII:3323216-3323986(-) | protein_length=256 | sequence_SO=chromosome | SO=protein_coding_gene | is_pseudo=false	0	24.939	19	2	13	2	256	26.3	11.06	32.22	2	2.009	0.765	1.01	-0.39	0.0956175	0.713564	0.503711	0.973941	33.85	56.81	1.01	-0.87	1.3	-0.39	-2.22	0.31	448792	141236	267920	30.8	44.25	41.87	654163	361263	448792	141236	91711.3	225434	180323	117605	829404	252827	426182	181851
FALSE	High	Master Protein	TGGT1_294560-t26_1-p1	transcript=TGGT1_294560-t26_1 | gene=TGGT1_294560 | organism=Toxoplasma_gondii_GT1 | gene_product=Protein kinase domain-containing protein [Source:UniProtKB/TrEMBL;Acc:A0A125YK13] | transcript_product=rhoptry kinase family protein ROP37 (incomplete catalytic triad) | location=TGGT1_chrIa:950597-952927(-) | protein_length=776 | sequence_SO=chromosome | SO=protein_coding_gene | is_pseudo=false	0	24.549	15	7	12	7	776	83.5	9.23	6.76	7	1.844	0.504	0.88	-0.99	0.157543	0.138831	0.660554	0.618882	15.8	2.3	0.88	0.72	1.26	-1.01	-0.99	-0.46	1.61241e+06	396798	707589	18.51	17.53	37.32	1.87591e+06	1.61241e+06	1.28752e+06	399223	396798	288281	309549	369819	341112	1.11816e+06	1.32803e+06	1.27065e+06
FALSE	High	Master Protein	TGGT1_220240-t26_1-p1	transcript=TGGT1_220240-t26_1 | gene=TGGT1_220240 | organism=Toxoplasma_gondii_GT1 | gene_product=hypothetical protein | transcript_product=hypothetical protein | location=TGGT1_chrV:140178-141758(-) | protein_length=526 | sequence_SO=chromosome | SO=protein_coding_gene | is_pseudo=false	0	24.505	16	7	45	7	526	54.1	9.86	39.02	7	1.021	1.451	0.03	0.54	0.738925	0.179985	0.981806	0.685227	55.56	12.26	0.59	-0.65	0.03	0.54	0.65	-1.02	3.3641e+06	3.85022e+06	3.10371e+06	25.18	46.73	5.19	4.09454e+06	2.43725e+06	3.3641e+06	3.85022e+06	5.03367e+06	1.75954e+06	2.40462e+06	3.48323e+06	2.04852e+06	3.17306e+06	3.10371e+06	3.77366e+06
FALSE	High	Master Protein	TGGT1_265310-t26_1-p1	transcript=TGGT1_265310-t26_1 | gene=TGGT1_265310 | organism=Toxoplasma_gondii_GT1 | gene_product=J domain-containing protein [Source:UniProtKB/TrEMBL;Acc:A0A125YIC5] | transcript_product=putative heat shock protein 40 | location=TGGT1_chrIX:1440716-1446749(+) | protein_length=336 | sequence_SO=chromosome | SO=protein_coding_gene | is_pseudo=false	0	24.284	18	5	19	5	336	37.2	9.25	33.19	5	1.108	0.564	0.15	-0.83	0.926976	0.238478	0.995562	0.79427	11.23	16.79	0.15	0.7	0.03	-0.98	-0.83	0.44	905445	438212	892186	42.07	72.83	6.17	905445	1.28975e+06	526451	242471	438212	1.0466e+06	403941	588388	833358	892186	1.03309e+06	787771
FALSE	High	Master Protein	TGGT1_270710-t26_1-p1	transcript=TGGT1_270710-t26_1 | gene=TGGT1_270710 | organism=Toxoplasma_gondii_GT1 | gene_product=WW domain binding protein 11 [Source:UniProtKB/TrEMBL;Acc:A0A125YK35] | transcript_product=WW domain binding protein 11 | location=TGGT1_chrVIII:5054929-5061212(-) | protein_length=561 | sequence_SO=chromosome | SO=protein_coding_gene | is_pseudo=false	0	24.166	14	8	33	8	561	61	7.97	23.29	8	1.12	0.676	0.16	-0.56	0.951102	0.486868	0.995562	0.933327	3.17	8.03	0.16	0.19	0.03	-0.69	-0.48	-0.56	2.19522e+06	1.19375e+06	2.10044e+06	9.49	10.94	6.69	2.19522e+06	1.86644e+06	2.22449e+06	1.11241e+06	1.19375e+06	1.37459e+06	1.19009e+06	1.24362e+06	1.5414e+06	1.96215e+06	2.10044e+06	2.58827e+06
FALSE	High	Master Protein	TGGT1_313910-t26_1-p1	transcript=TGGT1_313910-t26_1 | gene=TGGT1_313910 | organism=Toxoplasma_gondii_GT1 | gene_product=RRM_2 domain-containing protein [Source:UniProtKB/TrEMBL;Acc:S7UU31] | transcript_product=RNA recognition motif 2 protein | location=TGGT1_chrXI:3766770-3770119(+) | protein_length=903 | sequence_SO=chromosome | SO=protein_coding_gene | is_pseudo=false	0	24.059	7	5	22	5	903	99.6	7.17	21.38	5	1.008	0.736	0.01	-0.44	0.709676	0.638192	0.972787	0.973941	17.2	15	0.17	0.01	-0.31	-0.44	-0.29	-0.99	1.09578e+06	625367	1.2012e+06	9.54	26.08	18.23	1.14689e+06	951032	1.09578e+06	625367	690165	404851	656914	691640	477018	1.2012e+06	1.07613e+06	1.39258e+06
FALSE	High	Master Protein	TGGT1_289970-t26_1-p1	transcript=TGGT1_289970-t26_1 | gene=TGGT1_289970 | organism=Toxoplasma_gondii_GT1 | gene_product=hypothetical protein | transcript_product=hypothetical protein | location=TGGT1_chrIX:3366173-3367777(+) | protein_length=232 | sequence_SO=chromosome | SO=protein_coding_gene | is_pseudo=false	0	23.797	23	3	53	3	232	24.5	11.66	160.82	3	1.319	0.549	0.4	-0.86	0.672089	0.211863	0.971725	0.747503	18.9	53.43	0	0.4	0.57	-0.86	-1.31	0.15	1.57739e+07	8.17463e+06	1.08801e+07	26.38	31.87	21.16	1.28488e+07	1.57739e+07	2.15135e+07	8.17463e+06	4.8625e+06	9.51823e+06	1.17585e+07	6.96046e+06	9.83781e+06	1.45746e+07	1.41379e+07	1.52317e+07
FALSE	High	Master Protein	TGGT1_308920-t26_1-p1	transcript=TGGT1_308920-t26_1 | gene=TGGT1_308920 | organism=Toxoplasma_gondii_GT1 | gene_product=Splicing factor U2AF protein [Source:UniProtKB/TrEMBL;Acc:S7W7M9] | transcript_product=splicing factor U2AF protein | location=TGGT1_chrXI:318912-325751(-) | protein_length=770 | sequence_SO=chromosome | SO=protein_coding_gene | is_pseudo=false	0	23.688	9	4	16	4	770	83.1	6.55	14.81	4	1.238	1.012	0.31	0.02	0.814009	0.703361	0.995562	0.973941	36.42	0.67	-0.1	0.69	0.31	-0.32	0.02	0.02	1.06378e+06	652234	625414	19.41	9.14	18.14	765907	1.12185e+06	1.06378e+06	661233	652234	558278	825454	625414	598623	800600	818601	1.10673e+06
FALSE	High	Master Protein	TGGT1_284560-t26_1-p1	transcript=TGGT1_284560-t26_1 | gene=TGGT1_284560 | organism=Toxoplasma_gondii_GT1 | gene_product=Ribosomal protein RPL9 [Source:UniProtKB/TrEMBL;Acc:A0A125YRM1] | transcript_product=ribosomal protein RPL9 | location=TGGT1_chrV:2561959-2564374(+) | protein_length=190 | sequence_SO=chromosome | SO=protein_coding_gene | is_pseudo=false	0	23.569	30	4	21	4	190	21.4	9.64	41.91	4	1.524	0.868	0.61	-0.2	0.395087	0.976831	0.949873	0.987776	16.17	2.04	0.76	0.61	0	-0.14	-0.2	-0.22	1.82819e+06	1.29026e+06	1.59588e+06	13.45	11.53	17.49	2.25292e+06	1.77349e+06	1.82819e+06	1.29026e+06	1.12945e+06	1.42458e+06	1.73407e+06	1.2045e+06	2.03661e+06	1.34502e+06	1.69371e+06	1.59588e+06
FALSE	High	Master Protein	TGGT1_263070-t26_1-p1	transcript=TGGT1_263070-t26_1 | gene=TGGT1_263070 | organism=Toxoplasma_gondii_GT1 | gene_product=Protein kinase domain-containing protein [Source:UniProtKB/TrEMBL;Acc:S7WDT1] | transcript_product=CMGC kinase, CK2 family | location=TGGT1_chrVIIb:801033-806072(+) | protein_length=539 | sequence_SO=chromosome | SO=protein_coding_gene | is_pseudo=false	0	23.515	14	6	22	6	539	59.8	9.07	19.52	6	1.39	0.936	0.48	-0.1	0.563719	0.864388	0.964665	0.987776	5.79	4.82	0.48	0.82	0.42	-0.1	-0.14	0.24	1.69477e+06	993806	1.07959e+06	7.98	25.36	15.5	1.50909e+06	1.69477e+06	1.76471e+06	993806	885794	1.41274e+06	1.07959e+06	969537	1.30967e+06	1.12729e+06	1.25725e+06	1.42738e+06
FALSE	High	Master Protein	TGGT1_313690-t26_1-p1	transcript=TGGT1_313690-t26_1 | gene=TGGT1_313690 | organism=Toxoplasma_gondii_GT1 | gene_product=Sel1 repeat-containing protein [Source:UniProtKB/TrEMBL;Acc:S7UUJ6] | transcript_product=Sel1 repeat-containing protein | location=TGGT1_chrXI:3574530-3585874(-) | protein_length=1012 | sequence_SO=chromosome | SO=protein_coding_gene | is_pseudo=false	0	23.513	12	8	18	8	1012	111.5	6.28	1.61	8	0.942	0.76	-0.09	-0.4	0.567017	0.701773	0.967361	0.973941	2.32	11.96	-0.11	-0.09	0.06	-0.4	-0.27	-0.53	1.14789e+06	694642	958231	14.51	17.48	16.83	1.14789e+06	941374	1.26085e+06	608731	856573	694642	939228	952313	958231	1.29075e+06	1.23479e+06	1.58531e+06
FALSE	High	Master Protein	TGGT1_202620-t26_1-p1	transcript=TGGT1_202620-t26_1 | gene=TGGT1_202620 | organism=Toxoplasma_gondii_GT1 | gene_product=hypothetical protein | transcript_product=hypothetical protein | location=TGGT1_chrVIIa:3063678-3064673(-) | protein_length=331 | sequence_SO=chromosome | SO=protein_coding_gene | is_pseudo=false	0	23.402	12	3	8	3	331	36.1	9.47	16.66	3	1.245	1.465	0.32	0.55	0.80083	0.171838	0.995562	0.679947	24.55	7.83	0.54	0.32	-0.1	0.55	0.63	-1.37	492933	594750	476741	27.46	54.07	12.93	761415	492933	480305	594750	645241	179132	269388	478451	241540	433347	476741	557981
FALSE	High	Master Protein	TGGT1_297760-t26_1-p1	transcript=TGGT1_297760-t26_1 | gene=TGGT1_297760 | organism=Toxoplasma_gondii_GT1 | gene_product=hypothetical protein | transcript_product=hypothetical protein | location=TGGT1_chrII:1958316-1959080(+) | protein_length=254 | sequence_SO=chromosome | SO=protein_coding_gene | is_pseudo=false	0	23.252	37	7	29	7	254	28.1	10.74	19.78	7	1.347	0.665	0.43	-0.59	0.627712	0.459276	0.971725	0.924827	19.83	18.88	0.22	0.77	0.43	-0.59	-0.93	-0.39	1.56366e+06	640236	1.13767e+06	9.99	23.94	1.67	1.56366e+06	1.69526e+06	1.38702e+06	640236	417665	669847	1.11062e+06	959560	1.14707e+06	1.0313e+06	1.13767e+06	1.30057e+06
FALSE	High	Master Protein	TGGT1_291930-t26_1-p1	transcript=TGGT1_291930-t26_1 | gene=TGGT1_291930 | organism=Toxoplasma_gondii_GT1 | gene_product=RNA recognition motif-containing protein [Source:UniProtKB/TrEMBL;Acc:S7W432] | transcript_product=RNA recognition motif-containing protein | location=TGGT1_chrIX:4212023-4217780(+) | protein_length=705 | sequence_SO=chromosome | SO=protein_coding_gene | is_pseudo=false	0	23.246	11	7	23	7	705	73.1	5.43	13.7	7	0.667	0.612	-0.58	-0.71	0.111344	0.336565	0.557413	0.875727	19.32	3.24	0.49	-0.58	-0.76	-0.85	-0.71	-0.68	1.05888e+06	651885	1.42427e+06	40.79	23.69	23.58	1.71755e+06	776186	1.05888e+06	589737	651885	910223	643117	760721	985147	1.22184e+06	1.42427e+06	1.91936e+06
FALSE	High	Master Protein	TGGT1_242680-t26_1-p1	transcript=TGGT1_242680-t26_1 | gene=TGGT1_242680 | organism=Toxoplasma_gondii_GT1 | gene_product=TRASH domain-containing protein [Source:UniProtKB/TrEMBL;Acc:S7W735] | transcript_product=ribosomal protein RPL24e | location=TGGT1_chrVI:2093539-2096109(+) | protein_length=196 | sequence_SO=chromosome | SO=protein_coding_gene | is_pseudo=false	0	23.197	19	3	21	3	196	23.4	9.42	34.3	3	1.251	0.577	0.32	-0.79	0.789465	0.264371	0.995562	0.814268	4.56	0.45	0.28	0.32	0.57	-0.79	-0.8	-0.16	2.27044e+06	1.01712e+06	1.98738e+06	9.32	26.59	8.07	2.09833e+06	2.52395e+06	2.27044e+06	1.01712e+06	1.00889e+06	1.56404e+06	1.81612e+06	1.48042e+06	2.18941e+06	1.65541e+06	2.44054e+06	1.98738e+06
FALSE	High	Master Protein	TGGT1_262620-t26_1-p1	transcript=TGGT1_262620-t26_1 | gene=TGGT1_262620 | organism=Toxoplasma_gondii_GT1 | gene_product=RNA recognition motif-containing protein [Source:UniProtKB/TrEMBL;Acc:A0A125YHM1] | transcript_product=RNA recognition motif-containing protein | location=TGGT1_chrVIIb:1093901-1096823(+) | protein_length=293 | sequence_SO=chromosome | SO=protein_coding_gene | is_pseudo=false	0	22.904	28	8	36	8	293	31.7	9.07	24.62	8	0.851	0.501	-0.23	-1	0.382355	0.135882	0.949873	0.615288	61.02	19.51	0.53	-0.23	-0.9	-1	-0.7	-1.17	1.8423e+06	937341	2.4922e+06	27.41	21.97	31.45	2.85551e+06	1.8423e+06	1.8096e+06	786523	937341	1.21055e+06	699131	868221	1.39452e+06	1.82484e+06	2.4922e+06	3.44356e+06
FALSE	High	Master Protein	TGGT1_234180-t26_1-p1	transcript=TGGT1_234180-t26_1 | gene=TGGT1_234180 | organism=Toxoplasma_gondii_GT1 | gene_product=hypothetical protein | transcript_product=hypothetical protein | location=TGGT1_chrX:4070299-4072301(+) | protein_length=225 | sequence_SO=chromosome | SO=protein_coding_gene | is_pseudo=false	0	22.717	24	5	34	5	225	25	10.04	19.65	5	0.97	0.836	-0.04	-0.26	0.62622	0.898113	0.971725	0.987776	12.23	8.7	-0.69	-0.04	0.08	-0.26	-0.17	-0.67	2.43778e+06	2.12485e+06	2.51502e+06	23.2	27.75	16.32	1.57641e+06	2.44564e+06	2.43778e+06	2.16065e+06	2.12485e+06	1.25565e+06	2.55392e+06	2.48526e+06	1.88067e+06	2.53271e+06	2.51502e+06	3.01317e+06
FALSE	High	Master Protein	TGGT1_307980-t26_1-p1	transcript=TGGT1_307980-t26_1 | gene=TGGT1_307980 | organism=Toxoplasma_gondii_GT1 | gene_product=Translation factor GUF1 homolog, mitochondrial [Source:UniProtKB/TrEMBL;Acc:A0A125YTP2] | transcript_product=putative GTP-binding protein lepA | location=TGGT1_chrXII:420631-429728(+) | protein_length=806 | sequence_SO=chromosome | SO=protein_coding_gene | is_pseudo=false	0	22.517	8	3	11	3	806	88.9	9.33	20.12	3	2.586	1.096	1.37	0.13	0.0158483	0.554362	0.161693	0.962677	18.97	45.98	1.54	1.37	0.82	-0.4	0.13	0.66	1.01778e+06	673176	381333	36.63	51.92	60.24	1.07901e+06	1.01778e+06	501416	317609	1.01008e+06	673176	381333	885320	304536	305501	406974	599790
FALSE	High	Master Protein	TGGT1_221380-t26_1-p1	transcript=TGGT1_221380-t26_1 | gene=TGGT1_221380 | organism=Toxoplasma_gondii_GT1 | gene_product=Alba domain-containing protein [Source:UniProtKB/TrEMBL;Acc:A0A125YMA6] | transcript_product=alba 1 | location=TGGT1_chrII:281451-282798(-) | protein_length=247 | sequence_SO=chromosome | SO=protein_coding_gene | is_pseudo=false	0	22.387	28	6	37	6	247	27.2	9.74	38.76	6	1	0.226	0	-2.15	0.691818	0.000294712	0.971725	0.00424174	52.59	0.85	0.63	0	-0.59	-2.16	-1.55	-2.15	3.63982e+06	885997	4.32528e+06	48	19.53	23.5	7.66476e+06	3.63982e+06	3.49276e+06	678626	885997	1.01056e+06	651372	853330	1.23416e+06	3.89422e+06	4.32528e+06	6.00343e+06
FALSE	High	Master Protein	TGGT1_216560-t26_1-p1	transcript=TGGT1_216560-t26_1 | gene=TGGT1_216560 | organism=Toxoplasma_gondii_GT1 | gene_product=Ribosomal RNA-processing protein 8 [Source:UniProtKB/TrEMBL;Acc:S7ULR7] | transcript_product=methyltransferase domain-containing protein | location=TGGT1_chrXI:6001736-6005776(-) | protein_length=532 | sequence_SO=chromosome | SO=protein_coding_gene | is_pseudo=false	0	22.38	16	7	11	7	532	58.5	10.04	9.02	7	1.277	0.502	0.35	-0.99	0.744207	0.137065	0.986564	0.617176	1.97	33.56	-0.19	0.37	0.35	-1.29	-0.99	-0.39	894248	443784	895368	20.86	10.65	28.57	802530	1.18646e+06	894248	443784	416172	510828	722071	553623	572561	1.07553e+06	895368	1.07004e+06
FALSE	High	Master Protein	TGGT1_312090-t26_1-p1	transcript=TGGT1_312090-t26_1 | gene=TGGT1_312090 | organism=Toxoplasma_gondii_GT1 | gene_product=Ribosomal protein RPL23 [Source:UniProtKB/TrEMBL;Acc:A0A125YJR6] | transcript_product=ribosomal protein RPL23 | location=TGGT1_chrXI:2381590-2383685(-) | protein_length=139 | sequence_SO=chromosome | SO=protein_coding_gene | is_pseudo=false	0	22.321	29	4	32	4	139	14.8	9.91	41.08	4	1.331	0.763	0.41	-0.39	0.652521	0.710036	0.971725	0.973941	24.23	11.05	0.63	0.41	0.15	-1.27	-0.39	-0.28	3.89198e+06	1.07021e+06	2.3306e+06	30.26	33.44	31.13	4.50298e+06	2.3891e+06	3.89198e+06	884603	1.07021e+06	1.65571e+06	1.27515e+06	1.23468e+06	1.57298e+06	3.58671e+06	2.86146e+06	4.14708e+06
FALSE	High	Master Protein	TGGT1_284050-t26_1-p1	transcript=TGGT1_284050-t26_1 | gene=TGGT1_284050 | organism=Toxoplasma_gondii_GT1 | gene_product=DEAD/DEAH box helicase domain-containing protein [Source:UniProtKB/TrEMBL;Acc:S7UNJ3] | transcript_product=DEAD/DEAH box helicase domain-containing protein | location=TGGT1_chrV:2643913-2665787(+) | protein_length=2545 | sequence_SO=chromosome | SO=protein_coding_gene | is_pseudo=false	0	22.277	2	6	38	6	2545	280.7	8.32	37.99	6	1.061	0.58	0.09	-0.79	0.825967	0.269015	0.995562	0.818481	9.91	4	0.09	-0.01	0.42	-0.79	-0.75	-0.97	2.39802e+06	1.03434e+06	2.1099e+06	8.38	18.58	16.67	2.39802e+06	2.06868e+06	2.40452e+06	1.27957e+06	1.03434e+06	887170	1.65832e+06	1.35462e+06	1.54333e+06	2.64733e+06	2.54507e+06	3.72437e+06
FALSE	High	Master Protein	TGGT1_313440-t26_1-p1	transcript=TGGT1_313440-t26_1 | gene=TGGT1_313440 | organism=Toxoplasma_gondii_GT1 | gene_product=hypothetical protein | transcript_product=hypothetical protein | location=TGGT1_chrXI:3358899-3359828(-) | protein_length=309 | sequence_SO=chromosome | SO=protein_coding_gene | is_pseudo=false	0	22.021	21	5	17	5	309	35.5	5.86	9.74	5	1.079	1.019	0.11	0.03	0.864984	0.690683	0.995562	0.973941	3.5	39.42	0.11	0.08	0.29	0.03	0.37	-0.67	864018	813548	790824	9.03	33.44	14.11	818807	864018	974261	813548	993993	488881	649923	867788	653169	876265	1.00905e+06	1.10089e+06
FALSE	High	Master Protein	TGGT1_234420-t26_1-p1	transcript=TGGT1_234420-t26_1 | gene=TGGT1_234420 | organism=Toxoplasma_gondii_GT1 | gene_product=AAA domain-containing protein [Source:UniProtKB/TrEMBL;Acc:S7W4G4] | transcript_product=ATPase, AAA family protein | location=TGGT1_chrX:4262179-4269625(-) | protein_length=588 | sequence_SO=chromosome | SO=protein_coding_gene | is_pseudo=false	0	22.01	11	5	9	5	588	66.7	8.76	7.38	5	5.347	2.507	2.42	1.33	5.1218e-06	0.00514552	0.000165127	0.0524974	30.81	7.04	2.42	2.87	2.08	1.33	0.83	1.39	920613	392884	166452	7.19	16.2	12.98	810731	921062	920613	392884	317284	440462	108425	170708	158398	172697	159981	208146
FALSE	High	Master Protein	TGGT1_201630B-t26_1-p1	transcript=TGGT1_201630B-t26_1 | gene=TGGT1_201630B | organism=Toxoplasma_gondii_GT1 | gene_product=PPM-type phosphatase domain-containing protein [Source:UniProtKB/TrEMBL;Acc:S7WB62] | transcript_product=protein phosphatase 2C domain-containing protein | location=TGGT1_chrVIIa:3789335-3791056(+) | protein_length=256 | sequence_SO=chromosome | SO=protein_coding_gene | is_pseudo=false	0	21.975	18	4	38	4	256	29.1	7.46	57.24	4	1.055	1.164	0.08	0.22	0.812386	0.45125	0.995562	0.924827	29.26	0.27	-0.25	0.08	0.34	0.21	0.22	0.22	2.29443e+06	2.37442e+06	2.15662e+06	18.54	9.54	5.27	1.85573e+06	2.70257e+06	2.29443e+06	2.51199e+06	2.37442e+06	2.0787e+06	2.34828e+06	2.15662e+06	2.09516e+06	2.26485e+06	2.68681e+06	2.03805e+06
FALSE	High	Master Protein	TGGT1_211340-t26_1-p1	transcript=TGGT1_211340-t26_1 | gene=TGGT1_211340 | organism=Toxoplasma_gondii_GT1 | gene_product=hypothetical protein | transcript_product=hypothetical protein | location=TGGT1_chrIV:1744030-1751855(-) | protein_length=2239 | sequence_SO=chromosome | SO=protein_coding_gene | is_pseudo=false	0	21.902	3	6	20	6	2239	239.8	6.51	17.9	6	0.923	0.733	-0.12	-0.45	0.525896	0.630638	0.951523	0.973941	13.53	3.75	0.37	-0.12	-0.24	-0.45	-0.41	-0.93	1.15232e+06	670778	952227	28	12.44	18.58	1.61173e+06	1.15232e+06	935607	610014	778668	670778	557823	861756	660279	952227	868983	1.22991e+06
FALSE	High	Master Protein	TGGT1_315610-t26_1-p1	transcript=TGGT1_315610-t26_1 | gene=TGGT1_315610 | organism=Toxoplasma_gondii_GT1 | gene_product=hypothetical protein | transcript_product=hypothetical protein | location=TGGT1_chrXI:4798811-4799287(+) | protein_length=158 | sequence_SO=chromosome | SO=protein_coding_gene | is_pseudo=false	0	21.854	23	2	27	2	158	16	11.78	130.42	2	0.634	0.383	-0.66	-1.39	0.0814096	0.0270068	0.4671	0.199702	6.73	5.91	-0.17	-0.66	-0.72	-1.39	-1.79	-1.33	3.55882e+06	1.4793e+06	5.09625e+06	14.32	26.35	16.06	4.455e+06	3.461e+06	3.55882e+06	1.44278e+06	1.4793e+06	2.2469e+06	1.92268e+06	1.63599e+06	1.84632e+06	5.0307e+06	5.09625e+06	6.61519e+06
FALSE	High	Master Protein	TGGT1_300000-t26_1-p1	transcript=TGGT1_300000-t26_1 | gene=TGGT1_300000 | organism=Toxoplasma_gondii_GT1 | gene_product=Ribosomal_L18e/L15P domain-containing protein [Source:UniProtKB/TrEMBL;Acc:A0A125YRB0] | transcript_product=ribosomal protein RPL18 | location=TGGT1_chrXII:251803-254851(+) | protein_length=187 | sequence_SO=chromosome | SO=protein_coding_gene | is_pseudo=false	0	21.137	21	3	11	3	187	21.2	11.52	12.05	3	2.049	0.582	1.03	-0.78	0.0846689	0.274569	0.469274	0.818481	78.9	46.93	2.37	1.03	-0.06	-1.18	-0.78	-0.07	647545	182272	330477	69.82	57.04	18.81	1.59686e+06	647545	426853	130078	182272	379464	150698	340962	304259	330477	297100	501231
FALSE	High	Master Protein	TGGT1_315080-t26_1-p1	transcript=TGGT1_315080-t26_1 | gene=TGGT1_315080 | organism=Toxoplasma_gondii_GT1 | gene_product=hypothetical protein | transcript_product=hypothetical protein | location=TGGT1_chrXI:4404182-4413427(+) | protein_length=1517 | sequence_SO=chromosome | SO=protein_coding_gene | is_pseudo=false	0	21.04	6	6	25	6	1517	165.4	8.13	12.13	6	1.66	0.917	0.73	-0.12	0.270751	0.906701	0.862551	0.987776	22.32	0.13	0.73	0.93	0.06	-0.12	-0.13	0.16	1.48447e+06	845105	846364	25.48	12.46	5.13	1.48447e+06	1.59726e+06	955165	726395	845105	933726	775976	939679	990382	787443	840797	846364
FALSE	High	Master Protein	TGGT1_217400-t26_1-p1	transcript=TGGT1_217400-t26_1 | gene=TGGT1_217400 | organism=Toxoplasma_gondii_GT1 | gene_product=hypothetical protein | transcript_product=hypothetical protein | location=TGGT1_chrXII:1751068-1756262(+) | protein_length=771 | sequence_SO=chromosome | SO=protein_coding_gene | is_pseudo=false	0	20.602	10	7	24	7	771	85.8	8.06	10.01	7	1.192	1.081	0.25	0.11	0.901522	0.577729	0.995562	0.968466	2.82	7.29	0.25	0.34	0.23	0.11	0.18	0	1.81616e+06	1.70124e+06	1.56607e+06	4.8	14.47	8.12	1.73016e+06	1.81616e+06	1.90442e+06	1.94856e+06	1.70124e+06	1.45594e+06	1.27715e+06	1.56607e+06	1.37868e+06	1.61109e+06	1.71472e+06	2.12173e+06
FALSE	High	Master Protein	TGGT1_262670-t26_1-p1	transcript=TGGT1_262670-t26_1 | gene=TGGT1_262670 | organism=Toxoplasma_gondii_GT1 | gene_product=60S ribosomal protein L18a [Source:UniProtKB/TrEMBL;Acc:A0A125YSP4] | transcript_product=ribosomal protein RPL18A | location=TGGT1_chrVIIb:1067095-1069205(+) | protein_length=183 | sequence_SO=chromosome | SO=protein_coding_gene | is_pseudo=false	0	20.556	34	6	31	6	183	21.3	10.65	34.95	6	1.197	0.662	0.26	-0.6	0.891543	0.451658	0.995562	0.924827	27.7	20.02	1.17	0.26	-0.04	-0.6	-0.79	-0.39	1.96504e+06	894594	1.6388e+06	33.98	29.15	24.11	3.33882e+06	1.96504e+06	1.89209e+06	894594	857846	1.40709e+06	902221	960791	1.4828e+06	1.48938e+06	1.9683e+06	2.30982e+06
FALSE	High	Master Protein	TGGT1_201520-t26_1-p1	transcript=TGGT1_201520-t26_1 | gene=TGGT1_201520 | organism=Toxoplasma_gondii_GT1 | gene_product=PPM-type phosphatase domain-containing protein [Source:UniProtKB/TrEMBL;Acc:A0A125YGU4] | transcript_product=protein phosphatase 2C domain-containing protein | location=TGGT1_chrVIIa:3796769-3798550(+) | protein_length=232 | sequence_SO=chromosome | SO=protein_coding_gene | is_pseudo=false	0	20.498	29	7	58	7	232	26.4	7.83	34.94	7	0.947	1.177	-0.08	0.24	0.577711	0.433758	0.971725	0.924827	16.09	0.33	-0.08	-0.31	0.09	0.24	0.23	0.33	3.63749e+06	4.51507e+06	3.63478e+06	1.93	7.17	9.74	3.73866e+06	3.63749e+06	3.60273e+06	4.51507e+06	4.93955e+06	4.29258e+06	5.16015e+06	4.92814e+06	4.42472e+06	3.93237e+06	3.4217e+06	3.23357e+06
FALSE	High	Master Protein	TGGT1_235540-t26_1-p1	transcript=TGGT1_235540-t26_1 | gene=TGGT1_235540 | organism=Toxoplasma_gondii_GT1 | gene_product=eIF2B_5 domain-containing protein [Source:UniProtKB/TrEMBL;Acc:A0A125YH35] | transcript_product=putative eukaryotic initiation factor-2 beta | location=TGGT1_chrX:4824505-4828067(-) | protein_length=231 | sequence_SO=chromosome | SO=protein_coding_gene | is_pseudo=false	0	20.408	28	6	69	6	231	26.2	9.07	88.63	6	1.065	0.716	0.09	-0.48	0.834092	0.588783	0.995562	0.972458	1.13	1.15	0.08	0.09	0.24	-0.69	-0.47	-0.48	5.20735e+06	2.83133e+06	3.8131e+06	8.59	6.52	16.89	5.7198e+06	5.20735e+06	4.82125e+06	3.14112e+06	2.83133e+06	2.79411e+06	4.30187e+06	3.35905e+06	3.61024e+06	5.00637e+06	6.18244e+06	6.51251e+06
FALSE	High	Master Protein	TGGT1_255260-t26_1-p1	transcript=TGGT1_255260-t26_1 | gene=TGGT1_255260 | organism=Toxoplasma_gondii_GT1 | gene_product=Apical membrane antigen AMA1 [Source:UniProtKB/TrEMBL;Acc:S7WI53] | transcript_product=apical membrane antigen AMA1 | location=TGGT1_chrVIIb:4856406-4860874(+) | protein_length=569 | sequence_SO=chromosome | SO=protein_coding_gene | is_pseudo=false	0	20.389	14	7	19	7	569	63	6.16	10.73	7	1.07	0.786	0.1	-0.35	0.845375	0.769063	0.995562	0.978242	5.48	8.19	-0.09	0.15	0.1	-0.35	-0.42	-0.17	969619	773157	985016	13.78	8.71	10.29	882660	969619	1.15302e+06	773157	729380	864032	941177	1.0604e+06	1.14136e+06	888071	910445	1.23543e+06
FALSE	High	Master Protein	TGGT1_231150-t26_1-p1	transcript=TGGT1_231150-t26_1 | gene=TGGT1_231150 | organism=Toxoplasma_gondii_GT1 | gene_product=Lactamase_B domain-containing protein [Source:UniProtKB/TrEMBL;Acc:S7WB18] | transcript_product=hypothetical protein | location=TGGT1_chrVIII:1265628-1268698(+) | protein_length=660 | sequence_SO=chromosome | SO=protein_coding_gene | is_pseudo=false	0	20.373	9	4	5	4	660	73.2	9.33	11.58	4	1.019	0.845	0.03	-0.24	0.733537	0.920319	0.981806	0.987776	9.07	26.73	0.03	0.41	-0.06	0.04	-0.24	-0.53	554180	382160	475831	8.72	29	3.78	554180	561159	477727	476487	382160	260667	452143	389202	353613	412383	475831	487072
FALSE	High	Master Protein	TGGT1_270640-t26_1-p1	transcript=TGGT1_270640-t26_1 | gene=TGGT1_270640 | organism=Toxoplasma_gondii_GT1 | gene_product=RRM domain-containing protein [Source:UniProtKB/TrEMBL;Acc:A0A125YWZ3] | transcript_product=RNA recognition motif-containing protein | location=TGGT1_chrVIII:5107551-5110685(+) | protein_length=208 | sequence_SO=chromosome | SO=protein_coding_gene | is_pseudo=false	0	20.317	26	4	17	4	208	24.5	10.73	16.44	4	0.832	0.494	-0.26	-1.02	0.347786	0.125182	0.938934	0.590572	0.85	19	-0.26	0.17	-0.27	-0.66	-1.02	-1.19	1.15813e+06	486831	1.44337e+06	23.72	25.71	19.04	1.15813e+06	1.32511e+06	813882	663128	486831	402349	853627	587777	528243	1.61234e+06	1.6151e+06	1.76313e+06
FALSE	High	Master Protein	TGGT1_263050-t26_1-p1	transcript=TGGT1_263050-t26_1 | gene=TGGT1_263050 | organism=Toxoplasma_gondii_GT1 | gene_product=60S ribosomal protein L13 [Source:UniProtKB/TrEMBL;Acc:S7UXX9] | transcript_product=ribosomal protein RPL13 | location=TGGT1_chrVIIb:826699-830544(-) | protein_length=355 | sequence_SO=chromosome | SO=protein_coding_gene | is_pseudo=false	0	20.287	19	6	24	6	355	39.7	11.18	23.17	6	1.199	0.631	0.26	-0.66	0.88817	0.379138	0.995562	0.892961	33.9	1.74	0.56	0.26	-0.28	-0.66	-0.68	-0.38	1.66998e+06	940310	1.67561e+06	34.11	28.28	15.6	2.82572e+06	1.58911e+06	1.66998e+06	940310	883827	1.44334e+06	850099	950535	1.58172e+06	1.63035e+06	1.67561e+06	2.14218e+06
FALSE	High	Master Protein	TGGT1_235660-t26_1-p1	transcript=TGGT1_235660-t26_1 | gene=TGGT1_235660 | organism=Toxoplasma_gondii_GT1 | gene_product=hypothetical protein | transcript_product=hypothetical protein | location=TGGT1_chrX:4911643-4917130(-) | protein_length=462 | sequence_SO=chromosome | SO=protein_coding_gene | is_pseudo=false	0	20.174	8	4	54	4	462	51.6	8.09	66.66	4	1.159	0.996	0.21	-0.01	0.968727	0.735321	0.995562	0.976829	10.11	15.74	-0.5	0.31	0.21	0.16	-0.01	-0.33	1.90433e+06	1.65237e+06	1.63883e+06	22.13	15.03	11.56	1.31711e+06	1.90433e+06	2.05295e+06	1.95475e+06	1.65237e+06	1.45134e+06	1.61823e+06	1.63883e+06	1.97747e+06	1.61826e+06	1.87116e+06	2.13456e+06
FALSE	High	Master Protein	TGGT1_223910-t26_1-p1	transcript=TGGT1_223910-t26_1 | gene=TGGT1_223910 | organism=Toxoplasma_gondii_GT1 | gene_product=PlsC domain-containing protein [Source:UniProtKB/TrEMBL;Acc:A0A125YKZ9] | transcript_product=acyltransferase domain-containing protein | location=TGGT1_chrX:3371597-3378120(-) | protein_length=388 | sequence_SO=chromosome | SO=protein_coding_gene | is_pseudo=false	0	20.03	13	5	34	5	388	44	9.23	13.86	5	0.8	1.111	-0.32	0.15	0.291108	0.530356	0.888762	0.960964	0.09	39.42	-0.32	-0.82	-0.32	0.72	0.15	-0.29	861769	1.64169e+06	1.34796e+06	5.16	31.81	10.81	861769	821321	910423	2.10528e+06	1.64169e+06	1.08249e+06	1.23821e+06	1.55422e+06	1.34796e+06	1.23352e+06	948992	1.27373e+06
FALSE	High	Master Protein	TGGT1_247195-t26_1-p1	transcript=TGGT1_247195-t26_1 | gene=TGGT1_247195 | organism=Toxoplasma_gondii_GT1 | gene_product=Microneme protein MIC15 [Source:UniProtKB/TrEMBL;Acc:S7V0Y7] | transcript_product=microneme protein MIC15 | location=TGGT1_chrXII:3076266-3106706(-) | protein_length=2924 | sequence_SO=chromosome | SO=protein_coding_gene | is_pseudo=false	0	20.026	3	7	10	7	2924	320	5.19	5.17	7	1.08	0.84	0.11	-0.25	0.865384	0.907875	0.995562	0.987776	13.42	0.62	0.67	-0.03	0.11	-0.26	-0.25	0.08	898274	645084	854676	43.59	38.48	13.65	1.46029e+06	611936	898274	557522	645084	1.10929e+06	751603	689249	986955	1.63494e+06	854676	959248
FALSE	High	Master Protein	TGGT1_263720-t26_1-p1	transcript=TGGT1_263720-t26_1 | gene=TGGT1_263720 | organism=Toxoplasma_gondii_GT1 | gene_product=HMG box domain-containing protein [Source:UniProtKB/TrEMBL;Acc:S7UXH0] | transcript_product=HMG (high mobility group) box domain-containing protein | location=TGGT1_chrVIIb:341281-342669(+) | protein_length=145 | sequence_SO=chromosome | SO=protein_coding_gene | is_pseudo=false	0	19.99	21	4	134	3	145	16.6	9.89	208.59	4	0.982	0.875	-0.03	-0.19	0.652949	0.99449	0.971725	0.996322	16.56	0.19	-0.18	-0.03	0.14	-0.19	0.02	-0.19	7.72258e+06	7.45638e+06	8.38191e+06	4.11	15.47	1.42	8.04039e+06	7.40623e+06	7.72258e+06	7.45638e+06	8.64919e+06	6.33505e+06	7.90299e+06	8.40089e+06	6.51572e+06	8.18693e+06	9.47876e+06	1.09935e+07
FALSE	High	Master Protein	TGGT1_227140-t26_1-p1	transcript=TGGT1_227140-t26_1 | gene=TGGT1_227140 | organism=Toxoplasma_gondii_GT1 | gene_product=PUA_3 domain-containing protein [Source:UniProtKB/TrEMBL;Acc:S7W5S2] | transcript_product=hypothetical protein | location=TGGT1_chrX:978878-986066(-) | protein_length=1094 | sequence_SO=chromosome | SO=protein_coding_gene | is_pseudo=false	0	19.702	12	7	20	7	1094	117.7	9.36	2.02	7	1.535	0.496	0.62	-1.01	0.384252	0.128959	0.949873	0.590572	2.68	3.77	0.82	0.59	0.62	-1.2	-1.01	-0.97	1.16816e+06	322618	790324	19.24	0.19	4.75	1.39577e+06	1.16816e+06	945562	322618	321788	322963	342810	341902	388328	791427	983226	1.15436e+06
FALSE	High	Master Protein	TGGT1_319950-t26_1-p1	transcript=TGGT1_319950-t26_1 | gene=TGGT1_319950 | organism=Toxoplasma_gondii_GT1 | gene_product=PINc domain-containing protein [Source:UniProtKB/TrEMBL;Acc:A0A125YJB3] | transcript_product=putative rRNA-processing protein FCF1 | location=TGGT1_chrIV:577196-581097(-) | protein_length=201 | sequence_SO=chromosome | SO=protein_coding_gene | is_pseudo=false	0	19.68	20	4	21	4	201	23	9.79	25.51	4	1.165	0.549	0.22	-0.87	0.956181	0.210755	0.995562	0.747503	48.55	7.35	-0.35	0.69	0.22	-0.87	-0.94	0.23	3.69244e+06	1.66204e+06	2.61267e+06	26.71	39.57	13.31	2.30918e+06	3.96375e+06	3.69244e+06	1.66204e+06	1.12881e+06	2.51658e+06	3.42539e+06	2.19386e+06	3.80252e+06	2.78544e+06	3.21102e+06	2.61267e+06
FALSE	High	Master Protein	TGGT1_275480-t26_1-p1	transcript=TGGT1_275480-t26_1 | gene=TGGT1_275480 | organism=Toxoplasma_gondii_GT1 | gene_product=Myb family DNA-binding domain-containing protein [Source:UniProtKB/TrEMBL;Acc:S7VYM2] | transcript_product=Myb family DNA-binding domain-containing protein | location=TGGT1_chrX:7176962-7188868(-) | protein_length=888 | sequence_SO=chromosome | SO=protein_coding_gene | is_pseudo=false	0	19.674	5	3	10	3	888	99.2	6.81	26.75	3	1.158	0.539	0.21	-0.89	0.969099	0.193736	0.995562	0.706566	21.34	4.67	0.21	0.42	-0.01	-0.94	-0.31	-0.89	612372	124187	229678	58.2	59.3	31.51	709837	612372	167642	124187	284412	99414	122727	379522	118910	229678	274722	317548
FALSE	High	Master Protein	TGGT1_203790-t26_1-p1	transcript=TGGT1_203790-t26_1 | gene=TGGT1_203790 | organism=Toxoplasma_gondii_GT1 | gene_product=hypothetical protein | transcript_product=hypothetical protein | location=TGGT1_chrVIIa:2136205-2140811(+) | protein_length=302 | sequence_SO=chromosome | SO=protein_coding_gene | is_pseudo=false	0	19.516	16	3	12	3	302	34.2	6.52	19.55	3	0.931	0.649	-0.1	-0.62	0.543634	0.421246	0.956387	0.920068	21.34	13.18	-0.3	-0.1	0.36	-0.62	-0.88	-0.49	6.6087e+06	6.22514e+06	8.39403e+06	37.34	6.98	31.16	5.10415e+06	6.6087e+06	1.04541e+07	6.80029e+06	5.93287e+06	6.22514e+06	5.52729e+06	6.80105e+06	6.81184e+06	6.05761e+06	1.14159e+07	8.39403e+06
FALSE	High	Master Protein	TGGT1_262690-t26_1-p1	transcript=TGGT1_262690-t26_1 | gene=TGGT1_262690 | organism=Toxoplasma_gondii_GT1 | gene_product=Ribosomal protein RPL27 [Source:UniProtKB/TrEMBL;Acc:S7UYE2] | transcript_product=ribosomal protein RPL27 | location=TGGT1_chrVIIb:1055303-1056255(+) | protein_length=142 | sequence_SO=chromosome | SO=protein_coding_gene | is_pseudo=false	0	19.408	35	5	30	5	142	16.3	10.37	48.79	5	1.182	0.755	0.24	-0.41	0.922048	0.687367	0.995562	0.973941	11.89	22.17	0.24	0.35	-0.16	-0.69	-0.41	-0.17	1.859e+06	985955	1.79499e+06	15.08	29.45	11.37	1.859e+06	1.4855e+06	2.00793e+06	956264	985955	1.56722e+06	1.23056e+06	1.50193e+06	1.79499e+06	1.87387e+06	1.79426e+06	2.42689e+06
FALSE	High	Master Protein	TGGT1_246570-t26_1-p1	transcript=TGGT1_246570-t26_1 | gene=TGGT1_246570 | organism=Toxoplasma_gondii_GT1 | gene_product=hypothetical protein | transcript_product=hypothetical protein | location=TGGT1_chrXII:2791989-2792669(-) | protein_length=226 | sequence_SO=chromosome | SO=protein_coding_gene | is_pseudo=false	0	19.247	23	5	33	5	226	26	9.22	42.55	5	0.86	0.829	-0.22	-0.27	0.399886	0.879916	0.949873	0.987776	19.77	2.8	-0.01	-0.22	-0.49	-0.24	-0.3	-0.27	1.85919e+06	1.44052e+06	1.8494e+06	2.85	14.24	24.79	1.82552e+06	1.93006e+06	1.85919e+06	1.11406e+06	1.44549e+06	1.44052e+06	1.23196e+06	2.04276e+06	1.8494e+06	835518	879843	3.05019e+06
FALSE	High	Master Protein	TGGT1_237015-t26_1-p1	transcript=TGGT1_237015-t26_1 | gene=TGGT1_237015 | organism=Toxoplasma_gondii_GT1 | gene_product=hypothetical protein | transcript_product=hypothetical protein | location=TGGT1_chrX:5566838-5567632(-) | protein_length=264 | sequence_SO=chromosome | SO=protein_coding_gene | is_pseudo=false	0	19.178	22	4	22	4	264	29.3	8.73	27.2	4	0.837	1.088	-0.26	0.12	0.357156	0.567516	0.938934	0.962677	9.25	30.1	-0.16	-0.62	-0.26	0.54	0.12	-0.21	1.18699e+06	1.39676e+06	1.19644e+06	17.13	37.88	17.33	1.18699e+06	881226	1.22367e+06	1.39676e+06	1.42282e+06	651111	674748	1.2963e+06	645945	1.37825e+06	1.19644e+06	1.74195e+06
FALSE	High	Master Protein	TGGT1_243690-t26_1-p1	transcript=TGGT1_243690-t26_1 | gene=TGGT1_243690 | organism=Toxoplasma_gondii_GT1 | gene_product=hypothetical protein | transcript_product=hypothetical protein | location=TGGT1_chrVI:2711088-2713151(-) | protein_length=410 | sequence_SO=chromosome | SO=protein_coding_gene | is_pseudo=false	0	19.155	21	6	14	6	410	44.6	8.94	3.79	6	1.015	1.044	0.02	0.06	0.724571	0.64274	0.981806	0.973941	15.61	24.91	-0.21	0.02	0.17	0.06	0.29	-0.34	1.04972e+06	1.23857e+06	1.18436e+06	10.31	24.06	8.48	1.04972e+06	984676	1.20139e+06	1.23857e+06	1.34572e+06	827376	1.17386e+06	1.28435e+06	1.01984e+06	1.22604e+06	1.18436e+06	1.5555e+06
FALSE	High	Master Protein	TGGT1_269920-t26_1-p1	transcript=TGGT1_269920-t26_1 | gene=TGGT1_269920 | organism=Toxoplasma_gondii_GT1 | gene_product=Phosphatidylserine decarboxylase 2 proenzyme [Source:UniProtKB/Swiss-Prot;Acc:F6N7K6] | transcript_product=phosphatidylserine decarboxylase | location=TGGT1_chrVIII:5534744-5543165(-) | protein_length=968 | sequence_SO=chromosome | SO=protein_coding_gene | is_pseudo=false	0	19.126	7	6	6	6	968	108	8.92	4.33	6	0.982	1.098	-0.03	0.14	0.651934	0.549973	0.971725	0.962677	22.03	6.41	-0.03	0.21	-0.27	0.14	0.2	-0.4	842955	772455	761858	7.18	20.18	15.81	756305	869128	842955	897439	772455	594338	705382	735839	723975	858764	721753	1.05249e+06
FALSE	High	Master Protein	TGGT1_293230-t26_1-p1	transcript=TGGT1_293230-t26_1 | gene=TGGT1_293230 | organism=Toxoplasma_gondii_GT1 | gene_product=hypothetical protein | transcript_product=hypothetical protein | location=TGGT1_chrIa:161483-167785(-) | protein_length=459 | sequence_SO=chromosome | SO=protein_coding_gene | is_pseudo=false	0	19.116	17	5	14	5	459	50.1	9.31	4.09	5	1.891	0.733	0.92	-0.45	0.137097	0.631572	0.613891	0.973941	31.19	23.83	0.92	1.23	0.58	-0.45	-0.2	-0.79	1.21497e+06	282263	494926	24.36	8.64	19.48	1.21497e+06	814978	1.33819e+06	282263	260202	309168	171629	445621	452187	494926	588686	1.48042e+06
FALSE	High	Master Protein	TGGT1_258780-t26_1-p1	transcript=TGGT1_258780-t26_1 | gene=TGGT1_258780 | organism=Toxoplasma_gondii_GT1 | gene_product=OTU domain-containing protein [Source:UniProtKB/TrEMBL;Acc:S7UZ34] | transcript_product=OTU family cysteine protease | location=TGGT1_chrVIIb:3153619-3154710(-) | protein_length=363 | sequence_SO=chromosome | SO=protein_coding_gene | is_pseudo=false	0	18.83	20	6	23	6	363	40.6	9.07	15.49	6	1.143	0.899	0.19	-0.15	0.998929	0.948661	0.998929	0.987776	15.27	3.43	0.19	0.41	0.04	-0.39	-0.15	-0.12	1.06287e+06	459408	906470	8.43	17.57	8.11	1.21232e+06	1.06287e+06	1.04124e+06	429001	459408	592076	507934	453421	553392	926903	989889	906470
FALSE	High	Master Protein	TGGT1_285170-t26_1-p1	transcript=TGGT1_285170-t26_1 | gene=TGGT1_285170 | organism=Toxoplasma_gondii_GT1 | gene_product=Putative ribosomal RNA large subunit methyltransferase I [Source:UniProtKB/TrEMBL;Acc:S7W302] | transcript_product=putative ribosomal RNA large subunit methyltransferase I | location=TGGT1_chrV:2413954-2419976(-) | protein_length=853 | sequence_SO=chromosome | SO=protein_coding_gene | is_pseudo=false	0	18.72	8	6	19	6	853	93.3	8.72	13.05	6	1.232	0.589	0.3	-0.76	0.826084	0.287414	0.995562	0.833295	3.83	1.68	0.26	0.3	1.02	-0.75	-0.93	-0.76	988935	276869	581250	4.07	36.25	41.85	1.04247e+06	988935	962684	276869	367620	170780	271036	364246	230628	1.09082e+06	880129	1.12934e+06
FALSE	High	Master Protein	TGGT1_234450-t26_1-p1	transcript=TGGT1_234450-t26_1 | gene=TGGT1_234450 | organism=Toxoplasma_gondii_GT1 | gene_product=Ribosomal protein RPS15A [Source:UniProtKB/TrEMBL;Acc:S7UWC7] | transcript_product=ribosomal protein RPS15A | location=TGGT1_chrX:4292801-4294683(+) | protein_length=231 | sequence_SO=chromosome | SO=protein_coding_gene | is_pseudo=false	0	18.652	16	5	70	5	231	26.6	9.67	118.29	5	1.666	1.508	0.74	0.59	0.265933	0.14887	0.853953	0.63902	15.15	24.52	0.88	0.74	0.2	0.26	0.59	0.81	1.43082e+07	1.09961e+07	7.65602e+06	22.98	20.47	5.47	1.48146e+07	1.43082e+07	9.46087e+06	1.09961e+07	1.01248e+07	1.47296e+07	1.37451e+07	1.28207e+07	1.49292e+07	6.22962e+06	7.65602e+06	8.18833e+06
FALSE	High	Master Protein	TGGT1_312990-t26_1-p1	transcript=TGGT1_312990-t26_1 | gene=TGGT1_312990 | organism=Toxoplasma_gondii_GT1 | gene_product=RNA helicase [Source:UniProtKB/TrEMBL;Acc:A0A125YGG3] | transcript_product=DEAD/DEAH box ATP-dependent RNA helicase | location=TGGT1_chrXI:2984273-2989253(-) | protein_length=569 | sequence_SO=chromosome | SO=protein_coding_gene | is_pseudo=false	0	18.636	13	6	18	6	569	63.8	8.94	8.09	6	0.983	0.626	-0.02	-0.68	0.655762	0.367309	0.971725	0.888356	6.44	24.04	0.04	-0.02	-0.27	-0.89	-0.68	-0.28	1.21896e+06	650117	1.69672e+06	14.47	41.12	8.65	1.44563e+06	1.21896e+06	1.08795e+06	650117	634569	1.24207e+06	856240	987887	1.16666e+06	1.46852e+06	1.72646e+06	1.69672e+06
FALSE	High	Master Protein	TGGT1_212090-t26_1-p1	transcript=TGGT1_212090-t26_1 | gene=TGGT1_212090 | organism=Toxoplasma_gondii_GT1 | gene_product=hypothetical protein | transcript_product=hypothetical protein | location=TGGT1_chrX:3976691-3978589(-) | protein_length=632 | sequence_SO=chromosome | SO=protein_coding_gene | is_pseudo=false	0	18.562	8	5	23	5	632	70.2	9.57	20.5	5	1.25	0.583	0.32	-0.78	0.792625	0.275729	0.995562	0.818481	25.67	13.32	0.32	0.91	0.05	-0.78	-0.9	0.14	1.28988e+06	616194	1.12466e+06	9.46	46.73	12.83	1.28988e+06	1.51334e+06	1.28968e+06	616194	429597	1.07046e+06	993202	619845	1.28363e+06	1.16278e+06	1.12466e+06	1.47459e+06
FALSE	High	Master Protein	TGGT1_228170-t26_1-p1	transcript=TGGT1_228170-t26_1 | gene=TGGT1_228170 | organism=Toxoplasma_gondii_GT1 | gene_product=Metallophos domain-containing protein [Source:UniProtKB/TrEMBL;Acc:S7UX86] | transcript_product=inner membrane complex protein IMC2A | location=TGGT1_chrX:431147-436956(-) | protein_length=1596 | sequence_SO=chromosome | SO=protein_coding_gene | is_pseudo=false	0	18.413	6	6	16	6	1596	182.2	5.94	6.74	6	1.129	1.108	0.17	0.15	0.97011	0.534174	0.995562	0.960964	0.39	10.35	0.17	0.18	-0.01	0.15	0.5	0.04	577441	572804	473435	17.71	3.62	7.17	577441	456869	654662	572804	593476	552013	377834	422619	462711	473435	519711	745308
FALSE	High	Master Protein	TGGT1_263040-t26_1-p1	transcript=TGGT1_263040-t26_1 | gene=TGGT1_263040 | organism=Toxoplasma_gondii_GT1 | gene_product=Ribosomal protein RPS16 [Source:UniProtKB/TrEMBL;Acc:S7UY71] | transcript_product=ribosomal protein RPS16 | location=TGGT1_chrVIIb:830975-832663(+) | protein_length=211 | sequence_SO=chromosome | SO=protein_coding_gene | is_pseudo=false	0	18.309	23	5	36	5	211	24	10.89	33.47	5	1.187	0.844	0.25	-0.25	0.912296	0.916086	0.995562	0.987776	18.39	4.27	0.42	0.25	-0.21	-0.25	-0.29	0.1	4.27818e+06	3.40131e+06	3.5639e+06	14.74	15.98	17.05	5.37187e+06	4.27818e+06	4.13319e+06	3.40131e+06	2.78456e+06	3.84895e+06	4.22559e+06	3.72065e+06	4.66334e+06	2.80212e+06	3.5639e+06	4.90765e+06
FALSE	High	Master Protein	TGGT1_297430-t26_1-p1	transcript=TGGT1_297430-t26_1 | gene=TGGT1_297430 | organism=Toxoplasma_gondii_GT1 | gene_product=FoP_duplication domain-containing protein [Source:UniProtKB/TrEMBL;Acc:S7UK03] | transcript_product=hypothetical protein | location=TGGT1_chrII:1749482-1752364(+) | protein_length=248 | sequence_SO=chromosome | SO=protein_coding_gene | is_pseudo=false	0	18.005	21	4	22	4	248	25.3	11.63	34.86	4	0.81	0.612	-0.3	-0.71	0.307502	0.337178	0.912625	0.875727	30.09	4.2	0.43	-0.3	-0.57	-0.71	-0.67	-1.41	2.85054e+06	1.52645e+06	4.04162e+06	24.24	28.33	18.85	4.08224e+06	2.65308e+06	2.85054e+06	1.52645e+06	1.82477e+06	1.01069e+06	1.69387e+06	1.90622e+06	1.55323e+06	4.04162e+06	4.52358e+06	4.56939e+06
FALSE	High	Master Protein	TGGT1_320210-t26_1-p1	transcript=TGGT1_320210-t26_1 | gene=TGGT1_320210 | organism=Toxoplasma_gondii_GT1 | gene_product=WD domain, G-beta repeat domain containing protein [Source:UniProtKB/TrEMBL;Acc:A0A125YIX6] | transcript_product=WD domain, G-beta repeat domain containing protein | location=TGGT1_chrIV:376406-380420(+) | protein_length=515 | sequence_SO=chromosome | SO=protein_coding_gene | is_pseudo=false	0	17.86	10	3	13	3	515	56	7.46	10.71	3	1.256	0.671	0.33	-0.58	0.780391	0.474334	0.995562	0.927945	50.39	14.74	1.35	0.33	-0.27	-0.8	-0.42	-0.58	521690	205305	344452	50.34	16.32	22.1	1.02192e+06	521690	406408	156147	214336	205305	256717	335122	364247	344452	467634	667337
FALSE	High	Master Protein	TGGT1_271280-t26_1-p1	transcript=TGGT1_271280-t26_1 | gene=TGGT1_271280 | organism=Toxoplasma_gondii_GT1 | gene_product=60S ribosome subunit biogenesis protein NIP7 homolog [Source:UniProtKB/TrEMBL;Acc:A0A125YWY6] | transcript_product=putative 60S ribosome subunit biogenesis protein NIP7 | location=TGGT1_chrVIII:4602984-4605429(+) | protein_length=181 | sequence_SO=chromosome | SO=protein_coding_gene | is_pseudo=false	0	17.732	31	3	16	3	181	20.4	8.43	6.26	3	1.838	1.034	0.88	0.05	0.160526	0.661949	0.665087	0.973941	24.81	3.26	1.1	0.88	0.39	0.16	0.02	0.05	1.23223e+06	685190	711111	15.61	12.43	8.07	1.3033e+06	1.23223e+06	958968	811972	641394	685190	711111	736361	629504	648613	762761	856632
FALSE	High	Master Protein	TGGT1_237230-t26_1-p1	transcript=TGGT1_237230-t26_1 | gene=TGGT1_237230 | organism=Toxoplasma_gondii_GT1 | gene_product=hypothetical protein | transcript_product=hypothetical protein | location=TGGT1_chrX:5688823-5690440(-) | protein_length=213 | sequence_SO=chromosome | SO=protein_coding_gene | is_pseudo=false	0	17.726	30	4	19	4	213	23.9	5.72	12.55	4	1.238	1.076	0.31	0.11	0.814088	0.58737	0.995562	0.972191	32.25	31.21	-0.05	0.31	0.63	0.11	0.47	-0.24	966508	647338	648467	20.61	26.53	19.18	1.00928e+06	966508	674680	647338	959452	600359	667685	713028	620800	400849	461897	1.15191e+06
FALSE	High	Master Protein	TGGT1_304710-t26_1-p1	transcript=TGGT1_304710-t26_1 | gene=TGGT1_304710 | organism=Toxoplasma_gondii_GT1 | gene_product=eRF1_1 domain-containing protein [Source:UniProtKB/TrEMBL;Acc:S7UUD7] | transcript_product=putative eukaryotic peptide chain release factor | location=TGGT1_chrVIIa:615815-622350(-) | protein_length=814 | sequence_SO=chromosome | SO=protein_coding_gene | is_pseudo=false	0	17.697	9	6	25	6	814	90	8.88	12.94	6	1.523	0.966	0.61	-0.05	0.396159	0.798203	0.949873	0.987776	46.23	0.59	1	0.61	-0.11	-0.05	-0.06	0.24	2.74469e+06	1.90003e+06	1.37214e+06	35.34	35.74	10.99	3.43068e+06	2.74469e+06	1.61381e+06	999030	1.90003e+06	2.13522e+06	937539	1.77675e+06	1.50999e+06	1.21047e+06	1.37214e+06	1.89317e+06
FALSE	High	Master Protein	TGGT1_213400-t26_1-p1	transcript=TGGT1_213400-t26_1 | gene=TGGT1_213400 | organism=Toxoplasma_gondii_GT1 | gene_product=Zinc finger (CCCH type) motif-containing protein [Source:UniProtKB/TrEMBL;Acc:S7UNE2] | transcript_product=zinc finger (CCCH type) motif-containing protein | location=TGGT1_chrV:868952-873465(+) | protein_length=479 | sequence_SO=chromosome | SO=protein_coding_gene | is_pseudo=false	0	17.645	17	5	7	5	479	51.1	8.75	0	5	2.103	0.673	1.07	-0.57	0.0717332	0.479061	0.428274	0.932651	2.6	44.2	1.18	1.07	1.05	-1.55	-0.57	-0.06	720942	66045.6	261009	3.96	90.61	18.45	726801	675588	720942	66045.6	61641	273870	133357	101898	176437	534791	570380	673683
FALSE	High	Master Protein	TGGT1_316570A-t26_1-p1	transcript=TGGT1_316570A-t26_1 | gene=TGGT1_316570A | organism=Toxoplasma_gondii_GT1 | gene_product=hypothetical protein | transcript_product=hypothetical protein | location=TGGT1_chrXI:5348414-5350532(-) | protein_length=468 | sequence_SO=chromosome | SO=protein_coding_gene | is_pseudo=false	0	17.376	12	5	16	5	468	51.2	9.73	10.87	5	0.945	0.818	-0.08	-0.29	0.573255	0.850416	0.971725	0.987776	8.27	6.32	-0.08	-0.16	0.07	-0.23	-0.29	-0.41	461839	352730	501576	7.44	20.99	4.82	461839	457396	521411	495936	352730	348941	327401	331865	430161	570598	543565	501576
FALSE	High	Master Protein	TGGT1_226970-t26_1-p1	transcript=TGGT1_226970-t26_1 | gene=TGGT1_226970 | organism=Toxoplasma_gondii_GT1 | gene_product=Ribosomal_S17_N domain-containing protein [Source:UniProtKB/TrEMBL;Acc:A0A125YQR5] | transcript_product=ribosomal protein RPS11 | location=TGGT1_chrX:1087439-1090315(-) | protein_length=161 | sequence_SO=chromosome | SO=protein_coding_gene | is_pseudo=false	0	17.342	31	5	8	5	161	18.7	10.61	5.89	5	1.497	0.753	0.58	-0.41	0.425207	0.682736	0.949873	0.973941	17.05	16.51	0.74	0.58	-0.13	-0.56	-0.41	-0.17	1.42597e+06	713851	1.17515e+06	16.99	37.6	12.66	1.78479e+06	1.42597e+06	1.29154e+06	713851	637443	1.23259e+06	825792	729259	1.34202e+06	1.12009e+06	1.17515e+06	1.41457e+06
FALSE	High	Master Protein	TGGT1_210408-t26_1-p1	transcript=TGGT1_210408-t26_1 | gene=TGGT1_210408 | organism=Toxoplasma_gondii_GT1 | gene_product=HMG box domain-containing protein [Source:UniProtKB/TrEMBL;Acc:S7UPQ8] | transcript_product=HMG (high mobility group) box domain-containing protein | location=TGGT1_chrIX:4609915-4610199(+) | protein_length=94 | sequence_SO=chromosome | SO=protein_coding_gene | is_pseudo=false	0	17.101	36	4	132	3	94	10.7	10.1	204.83	4	0.9	3.01	-0.15	1.59	0.478804	0.00102233	0.951523	0.012875	26.79	45.26	-0.15	-0.98	0.14	1.59	0.57	1.97	8.24147e+06	2.57832e+07	8.29465e+06	13.71	53.04	24.01	7.25045e+06	8.24147e+06	9.53114e+06	3.95686e+07	1.21616e+07	2.57832e+07	1.63257e+07	1.09246e+07	8.29465e+06	3.913e+06	1.60292e+07	9.4194e+06
FALSE	High	Master Protein	TGGT1_250730-t26_1-p1	transcript=TGGT1_250730-t26_1 | gene=TGGT1_250730 | organism=Toxoplasma_gondii_GT1 | gene_product=Putative 60S ribosomal protein L7-B [Source:UniProtKB/TrEMBL;Acc:S7V062] | transcript_product=putative 60S ribosomal protein L7-B | location=TGGT1_chrXII:5080605-5084376(+) | protein_length=267 | sequence_SO=chromosome | SO=protein_coding_gene | is_pseudo=false	0	16.976	14	4	42	4	267	30.8	10.29	53.93	4	1.311	0.59	0.39	-0.76	0.685425	0.289394	0.971725	0.836027	34.44	3.33	0.01	0.39	0.87	-0.81	-0.76	-0.73	1.66134e+06	436828	1.01769e+06	7.1	21.3	30.63	1.65819e+06	1.66134e+06	1.87272e+06	425246	436828	612043	552334	828879	936090	2.00734e+06	1.60166e+06	1.58747e+06
FALSE	High	Master Protein	TGGT1_232230-t26_1-p1	transcript=TGGT1_232230-t26_1 | gene=TGGT1_232230 | organism=Toxoplasma_gondii_GT1 | gene_product=Ribosomal_L7Ae domain-containing protein [Source:UniProtKB/TrEMBL;Acc:A0A125YGX8] | transcript_product=ribosomal protein RPL30 | location=TGGT1_chrVIII:1959965-1961788(-) | protein_length=108 | sequence_SO=chromosome | SO=protein_coding_gene | is_pseudo=false	0	16.914	37	4	24	4	108	11.7	9.33	14.42	4	1.245	1.327	0.32	0.41	0.800956	0.270494	0.995562	0.818481	17.15	28.6	0.32	0.47	-0.08	0.41	0.1	0.69	1.5949e+06	1.57162e+06	1.1167e+06	19.32	28.38	13.18	1.68258e+06	1.5949e+06	1.15079e+06	1.57162e+06	1.04727e+06	1.8929e+06	1.37428e+06	1.1167e+06	1.49345e+06	918531	1.20723e+06	1.31633e+06
FALSE	High	Master Protein	TGGT1_256770-t26_1-p1	transcript=TGGT1_256770-t26_1 | gene=TGGT1_256770 | organism=Toxoplasma_gondii_GT1 | gene_product=Putative eukaryotic translation initiation factor 4A, isoform 3 [Source:UniProtKB/TrEMBL;Acc:A0A125YSV5] | transcript_product=putative eukaryotic translation initiation factor 4A, isoform 3 | location=TGGT1_chrVIIb:4408455-4411451(+) | protein_length=395 | sequence_SO=chromosome | SO=protein_coding_g…	0	16.899	19	7	15	7	395	45.1	6.38	8.07	7	1.037	0.371	0.05	-1.43	0.773512	0.0216241	0.995562	0.170873	37.79	39.3	0.38	0.05	-0.97	-1.43	-0.49	-1.77	713061	314765	915942	36.09	27.06	25.05	1.18082e+06	713061	616104	303234	480314	314765	330003	417626	334947	825103	915942	1.30388e+06
FALSE	High	Master Protein	TGGT1_214980-t26_1-p1	transcript=TGGT1_214980-t26_1 | gene=TGGT1_214980 | organism=Toxoplasma_gondii_GT1 | gene_product=hypothetical protein | transcript_product=hypothetical protein | location=TGGT1_chrX:6539930-6543566(-) | protein_length=1109 | sequence_SO=chromosome | SO=protein_coding_gene | is_pseudo=false	0	16.882	4	3	20	3	1109	117.1	9.63	21.19	3	0.992	0.777	-0.01	-0.36	0.675291	0.746806	0.971725	0.976829	0.45	12.78	-0.02	-0.01	0.12	-0.36	-0.23	-0.93	561598	514386	519242	36.29	44.25	7.31	561598	454682	898439	564854	514386	212504	466723	395472	327595	519242	461859	833626
FALSE	High	Master Protein	TGGT1_211040-t26_1-p1	transcript=TGGT1_211040-t26_1 | gene=TGGT1_211040 | organism=Toxoplasma_gondii_GT1 | gene_product=Protein transport protein Sec61 subunit beta [Source:UniProtKB/TrEMBL;Acc:A0A125YP58] | transcript_product=Sec61beta family protein | location=TGGT1_chrIV:1885778-1887505(+) | protein_length=99 | sequence_SO=chromosome | SO=protein_coding_gene | is_pseudo=false	0	16.869	35	3	41	3	99	10.1	10.87	76.26	3	0.528	1.102	-0.92	0.14	0.0223607	0.544736	0.209567	0.962677	7.67	4.87	0.3	-0.99	-0.92	0.14	0.19	-1.06	1.54352e+06	2.72569e+06	3.22739e+06	56.18	28.15	35.86	2.90091e+06	1.54352e+06	933564	2.72569e+06	3.5008e+06	1.96364e+06	1.81641e+06	3.22739e+06	2.2764e+06	1.36716e+06	4.28338e+06	3.91863e+06
FALSE	High	Master Protein	TGGT1_294890-t26_1-p1	transcript=TGGT1_294890-t26_1 | gene=TGGT1_294890 | organism=Toxoplasma_gondii_GT1 | gene_product=hypothetical protein | transcript_product=hypothetical protein | location=TGGT1_chrIa:1232009-1234201(+) | protein_length=630 | sequence_SO=chromosome | SO=protein_coding_gene | is_pseudo=false	0	16.725	6	3	8	3	630	68.9	8.88	7.25	3	1.485	1.081	0.57	0.11	0.439648	0.577956	0.949873	0.968466	24.51	17.05	0.57	0.79	-0.18	0.27	0.11	-0.41	403122	264196	341759	9.98	24.85	28.2	427323	403122	350472	387717	252507	264196	321849	295312	525995	341759	260015	499121
FALSE	High	Master Protein	TGGT1_211690-t26_1-p1	transcript=TGGT1_211690-t26_1 | gene=TGGT1_211690 | organism=Toxoplasma_gondii_GT1 | gene_product=DRBM domain-containing protein [Source:UniProtKB/TrEMBL;Acc:S7UKM4] | transcript_product=AAA family protein | location=TGGT1_chrIV:1531700-1551811(-) | protein_length=1538 | sequence_SO=chromosome | SO=protein_coding_gene | is_pseudo=false	0	16.661	3	3	8	3	1538	167.1	8.87	3.71	3	1.326	0.967	0.41	-0.05	0.661001	0.794997	0.971725	0.987776	50.33	24.59	0.83	0.41	-0.19	-0.05	0.23	-0.27	291150	233371	234012	30	11.84	6.32	380708	291150	205306	226122	279899	233371	187381	250795	221120	234012	254424	278522
FALSE	High	Master Protein	TGGT1_312950-t26_1-p1	transcript=TGGT1_312950-t26_1 | gene=TGGT1_312950 | organism=Toxoplasma_gondii_GT1 | gene_product=hypothetical protein | transcript_product=hypothetical protein | location=TGGT1_chrXI:2957002-2958414(+) | protein_length=470 | sequence_SO=chromosome | SO=protein_coding_gene | is_pseudo=false	0	16.6	16	4	10	4	470	53.6	9.47	13.36	4	0.765	0.708	-0.39	-0.5	0.235499	0.567421	0.811163	0.962677	5.04	11.82	-0.43	-0.39	0.13	-1.3	-0.38	-0.5	362020	160091	474087	7.15	16.27	10.39	362020	322731	369532	204432	152506	160091	290035	209420	191268	567152	396752	474087
FALSE	High	Master Protein	TGGT1_261580-t26_1-p1	transcript=TGGT1_261580-t26_1 | gene=TGGT1_261580 | organism=Toxoplasma_gondii_GT1 | gene_product=Histone H2A [Source:UniProtKB/TrEMBL;Acc:A0A125YFR2] | transcript_product=histone H2AX | location=TGGT1_chrVIIb:1624096-1624503(-) | protein_length=135 | sequence_SO=chromosome | SO=protein_coding_gene | is_pseudo=false	0	16.295	29	3	23	2	135	14.5	10.56	46.56	3	1.418	0.876	0.5	-0.19	0.524935	0.995086	0.951523	0.996322	19.62	6.14	0.68	0.5	-0.57	-0.9	-0.13	-0.19	5.33708e+06	2.27404e+06	5.35164e+06	14.48	30.91	16.92	5.34667e+06	5.33708e+06	4.1055e+06	1.76065e+06	2.27404e+06	3.23664e+06	2.486e+06	2.84281e+06	3.17378e+06	5.35164e+06	5.123e+06	8.1317e+06
FALSE	High	Master Protein	TGGT1_252270-t26_1-p1	transcript=TGGT1_252270-t26_1 | gene=TGGT1_252270 | organism=Toxoplasma_gondii_GT1 | gene_product=L1P family of ribosomal protein [Source:UniProtKB/TrEMBL;Acc:S7VW02] | transcript_product=L1P family of ribosomal protein | location=TGGT1_chrIII:433671-440310(+) | protein_length=607 | sequence_SO=chromosome | SO=protein_coding_gene | is_pseudo=false	0	16.288	12	6	11	6	607	65.4	9.48	6.14	6	1.091	0.943	0.13	-0.08	0.889374	0.847293	0.995562	0.987776	21.1	5.36	-0.1	0.45	0.13	0.05	-0.14	-0.08	1.681e+06	1.29973e+06	1.49348e+06	7.52	7.13	5.78	1.681e+06	1.76871e+06	1.52277e+06	1.43317e+06	1.29973e+06	1.25021e+06	1.49348e+06	1.54973e+06	1.3822e+06	1.41139e+06	1.56404e+06	1.52191e+06
FALSE	High	Master Protein	TGGT1_211260-t26_1-p1	transcript=TGGT1_211260-t26_1 | gene=TGGT1_211260 | organism=Toxoplasma_gondii_GT1 | gene_product=Protein kinase domain-containing protein [Source:UniProtKB/TrEMBL;Acc:S7UKG8] | transcript_product=rhoptry kinase family protein ROP26 (incomplete catalytic triad) | location=TGGT1_chrIV:1816280-1817587(-) | protein_length=435 | sequence_SO=chromosome | SO=protein_coding_gene | is_pseudo=false	0	16.278	11	4	9	4	435	47.8	9.19	3.92	4	1.146	1.087	0.2	0.12	0.995408	0.568462	0.998872	0.962677	5.61	10.13	0.14	0.2	0.27	0.12	0.22	0.01	582458	526917	504997	3.12	9.75	3.82	552627	582458	584700	526917	563256	463530	604349	659547	489159	504997	527699	525354
FALSE	High	Master Protein	TGGT1_300110-t26_1-p1	transcript=TGGT1_300110-t26_1 | gene=TGGT1_300110 | organism=Toxoplasma_gondii_GT1 | gene_product=hypothetical protein | transcript_product=hypothetical protein | location=TGGT1_chrXII:169162-172319(+) | protein_length=287 | sequence_SO=chromosome | SO=protein_coding_gene | is_pseudo=false	0	16.263	26	4	16	4	287	31.5	5.16	7.15	4	1.932	0.454	0.95	-1.14	0.120947	0.0785883	0.57343	0.439876	23.24	13	0.95	1.16	0.43	-1.14	-0.62	-1.26	600246	54001.8	441656	21.28	52.77	59.53	600246	449540	694953	54001.8	89629	29163.3	55894	111621	88477.1	444646	473990	744489
FALSE	High	Master Protein	TGGT1_247590-t26_1-p1	transcript=TGGT1_247590-t26_1 | gene=TGGT1_247590 | organism=Toxoplasma_gondii_GT1 | gene_product=Methyltransf_11 domain-containing protein [Source:UniProtKB/TrEMBL;Acc:S7W9T9] | transcript_product=methyltransferase domain-containing protein | location=TGGT1_chrXII:3359459-3364217(+) | protein_length=883 | sequence_SO=chromosome | SO=protein_coding_gene | is_pseudo=false	0	16.049	9	5	20	5	883	95.9	6.76	11.97	5	1.678	0.911	0.75	-0.13	0.256799	0.920276	0.851439	0.987776	24.83	6.5	0.97	0.75	0.09	-0.07	-0.13	-0.6	675577	315839	270810	19.52	14	62.11	714885	486456	675577	324076	315839	248508	169577	247741	336212	446670	536644	693402
FALSE	High	Master Protein	TGGT1_289540-t26_1-p1	transcript=TGGT1_289540-t26_1 | gene=TGGT1_289540 | organism=Toxoplasma_gondii_GT1 | gene_product=hypothetical protein | transcript_product=hypothetical protein | location=TGGT1_chrIX:3100902-3103715(+) | protein_length=937 | sequence_SO=chromosome | SO=protein_coding_gene | is_pseudo=false	0	15.887	6	6	11	6	937	100.5	7.23	6.28	6	1.762	1.043	0.82	0.06	0.201024	0.644999	0.767892	0.973941	8.82	5.53	0.82	0.9	0.47	0.06	0.33	0.01	1.06518e+06	779816	661871	4.66	20.59	20.84	1.02732e+06	1.06518e+06	1.12648e+06	541231	806442	779816	504346	696350	777449	666445	661871	919992
FALSE	High	Master Protein	TGGT1_289750-t26_1-p1	transcript=TGGT1_289750-t26_1 | gene=TGGT1_289750 | organism=Toxoplasma_gondii_GT1 | gene_product=Ubiquitin-like domain-containing protein [Source:UniProtKB/TrEMBL;Acc:A0A125YNY4] | transcript_product=ribosomal-ubiquitin protein RPL40 | location=TGGT1_chrIX:3235966-3237173(+) | protein_length=129 | sequence_SO=chromosome | SO=protein_coding_gene | is_pseudo=false	0	15.878	41	5	28	5	129	14.7	9.8	36.06	5	0.769	0.618	-0.38	-0.7	0.240782	0.348952	0.818862	0.883421	28.18	16.61	-0.08	-0.38	-0.76	-0.85	-0.7	-0.33	3.99306e+06	2.70212e+06	4.89712e+06	13.3	51.23	3.22	3.3656e+06	3.99306e+06	4.4006e+06	2.22252e+06	2.70212e+06	5.52514e+06	4.98905e+06	3.09938e+06	4.45893e+06	5.58386e+06	4.68419e+06	5.86716e+06
FALSE	High	Master Protein	TGGT1_306220-t26_1-p1	transcript=TGGT1_306220-t26_1 | gene=TGGT1_306220 | organism=Toxoplasma_gondii_GT1 | gene_product=hypothetical protein | transcript_product=hypothetical protein | location=TGGT1_chrIX:5617255-5624378(+) | protein_length=675 | sequence_SO=chromosome | SO=protein_coding_gene | is_pseudo=false	0	15.829	8	4	13	4	675	77.2	9.64	7.09	4	1.02	0.625	0.03	-0.68	0.736513	0.366518	0.981806	0.888356	8.35	15.53	0.03	0.11	-0.33	-0.52	-0.68	-0.87	581481	319543	569737	15.26	48.72	9.1	644179	581481	473310	461841	319543	157221	519813	383570	451225	627497	523307	863528
FALSE	High	Master Protein	TGGT1_259980-t26_1-p1	transcript=TGGT1_259980-t26_1 | gene=TGGT1_259980 | organism=Toxoplasma_gondii_GT1 | gene_product=J domain-containing protein [Source:UniProtKB/TrEMBL;Acc:S7W763] | transcript_product=DnaJ domain-containing protein | location=TGGT1_chrVIIb:2531634-2539640(-) | protein_length=476 | sequence_SO=chromosome | SO=protein_coding_gene | is_pseudo=false	0	15.725	11	5	15	5	476	53.5	9.36	26.16	5	1.073	0.746	0.1	-0.42	0.851013	0.664797	0.995562	0.973941	19.6	10	0.28	-0.41	0.1	-0.42	-0.74	-0.32	1.70701e+06	845470	1.67803e+06	10.39	21.59	10.29	1.90211e+06	1.54559e+06	1.70701e+06	822718	845470	1.18975e+06	778075	853100	1.12476e+06	1.6312e+06	1.96546e+06	1.67803e+06
FALSE	High	Master Protein	TGGT1_204020-t26_1-p1	transcript=TGGT1_204020-t26_1 | gene=TGGT1_204020 | organism=Toxoplasma_gondii_GT1 | gene_product=Ribosomal_L2_C domain-containing protein [Source:UniProtKB/TrEMBL;Acc:A0A125YV56] | transcript_product=ribosomal protein RPL8 | location=TGGT1_chrVIIa:1947745-1950214(+) | protein_length=260 | sequence_SO=chromosome | SO=protein_coding_gene | is_pseudo=false	0	15.589	15	3	15	3	260	28.2	10.87	12.93	3	1.14	0.84	0.19	-0.25	0.992836	0.906856	0.998872	0.987776	23.91	6.14	0.69	0.19	-0.06	-1.22	-0.25	-0.19	1.16029e+06	606699	1.15162e+06	20.48	29.43	27.62	1.60115e+06	1.12503e+06	1.16029e+06	514586	606699	893593	589947	672540	868588	1.15162e+06	1.21705e+06	1.74087e+06
FALSE	High	Master Protein	TGGT1_313385-t26_1-p1	transcript=TGGT1_313385-t26_1 | gene=TGGT1_313385 | organism=Toxoplasma_gondii_GT1 | gene_product=hypothetical protein | transcript_product=hypothetical protein | location=TGGT1_chrXI:3296399-3296994(-) | protein_length=85 | sequence_SO=chromosome | SO=protein_coding_gene | is_pseudo=false	0	15.44	19	1	21	1	85	9.1	10.64	8.51	1	2.213	1.851	1.15	0.89	0.0510024	0.0467108	0.363235	0.30362	8.25	12.55	0.14	1.15	1.22	-0.57	0.89	1.01	3.12347e+06	2.84532e+06	1.58905e+06	12.56	40.65	4.35	3.12347e+06	3.59266e+06	2.8002e+06	1.5501e+06	3.7438e+06	2.84532e+06	2.25341e+06	2.55228e+06	1.70056e+06	1.38818e+06	1.58905e+06	1.99903e+06
FALSE	High	Master Protein	TGGT1_216880-t26_1-p1	transcript=TGGT1_216880-t26_1 | gene=TGGT1_216880 | organism=Toxoplasma_gondii_GT1 | gene_product=WD_REPEATS_REGION domain-containing protein [Source:UniProtKB/TrEMBL;Acc:A0A125YYR8] | transcript_product=guanine nucleotide-binding protein | location=TGGT1_chrXI:5736268-5739860(-) | protein_length=321 | sequence_SO=chromosome | SO=protein_coding_gene | is_pseudo=false	0	15.317	17	4	10	4	321	35.1	6.34	14.25	4	1.189	0.906	0.25	-0.14	0.907466	0.931542	0.995562	0.987776	61.36	16.16	0.75	0.25	-0.55	-0.4	-0.14	0.02	823951	146431	637836	22.85	97.5	13.99	840029	823951	541372	146431	139486	695201	394897	320360	773557	637836	594244	703575
FALSE	High	Master Protein	TGGT1_284010-t26_1-p1	transcript=TGGT1_284010-t26_1 | gene=TGGT1_284010 | organism=Toxoplasma_gondii_GT1 | gene_product=53EXOc domain-containing protein [Source:UniProtKB/TrEMBL;Acc:S7W2T4] | transcript_product=5'-3' exonuclease, N-terminal resolvase family domain-containing protein | location=TGGT1_chrV:2688069-2694758(+) | protein_length=1168 | sequence_SO=chromosome | SO=protein_coding_gene | is_pseudo=false	0	15.245	7	5	16	5	1168	125.3	9.83	9.59	5	2.068	0.783	1.05	-0.35	0.0797935	0.760047	0.462688	0.97703	26.92	3.14	1.05	1.58	0.76	-0.35	-0.38	0.41	836508	249231	319645	12.85	62.45	14.67	836508	968227	750919	249231	196117	594886	311390	289428	384507	436385	547834	592711
FALSE	High	Master Protein	TGGT1_216010-t26_1-p1	transcript=TGGT1_216010-t26_1 | gene=TGGT1_216010 | organism=Toxoplasma_gondii_GT1 | gene_product=KOW domain-containing protein [Source:UniProtKB/TrEMBL;Acc:A0A125YTV3] | transcript_product=ribosomal protein RPL24 | location=TGGT1_chrXI:6389053-6392718(+) | protein_length=438 | sequence_SO=chromosome | SO=protein_coding_gene | is_pseudo=false	0	15.2	11	4	15	4	438	48	10.14	9.52	4	1.074	0.97	0.1	-0.04	0.852365	0.788831	0.995562	0.987776	2.77	29.12	0.13	-0.12	0.1	-0.3	-0.04	0.42	577300	498588	467666	28.55	15.5	11.38	864348	577300	515324	411195	498588	562812	565016	587736	588821	537202	393899	429931
FALSE	High	Master Protein	TGGT1_286450-t26_1-p1	transcript=TGGT1_286450-t26_1 | gene=TGGT1_286450 | organism=Toxoplasma_gondii_GT1 | gene_product=Dense granule protein GRA5 [Source:UniProtKB/TrEMBL;Acc:A0A125YQQ2] | transcript_product=dense granule protein GRA5 | location=TGGT1_chrV:1680404-1680766(+) | protein_length=120 | sequence_SO=chromosome | SO=protein_coding_gene | is_pseudo=false	0	15.192	23	2	23	2	120	13	5.99	58.29	2	0.644	0.955	-0.63	-0.07	0.0900016	0.8207	0.485304	0.987776	36.89	23.24	-0.09	-0.95	-0.63	0.18	-0.07	-3.1	692616	1.46466e+06	1.76977e+06	11.42	47.8	37.06	692616	833685	683721	1.46466e+06	1.58015e+06	538640	893394	2.08396e+06	2.2284e+06	1.11267e+06	988775	1.96924e+06
FALSE	High	Master Protein	TGGT1_223685-t26_1-p1	transcript=TGGT1_223685-t26_1 | gene=TGGT1_223685 | organism=Toxoplasma_gondii_GT1 | gene_product=hypothetical protein | transcript_product=hypothetical protein | location=TGGT1_chrX:3560511-3561558(+) | protein_length=157 | sequence_SO=chromosome | SO=protein_coding_gene | is_pseudo=false	0	15.159	23	3	14	3	157	17.2	10.52	13.66	3	0.934	0.999	-0.1	0	0.550515	0.730565	0.956542	0.976829	1.69	3.43	-0.08	-0.11	-0.1	-0.3	0	0.03	517627	430715	559554	24.74	12.61	18.48	517627	742115	476068	422044	430715	526545	625749	459573	529403	559554	396024	667242
FALSE	High	Master Protein	TGGT1_304955-t26_1-p1	transcript=TGGT1_304955-t26_1 | gene=TGGT1_304955 | organism=Toxoplasma_gondii_GT1 | gene_product=PPM-type phosphatase domain-containing protein [Source:UniProtKB/TrEMBL;Acc:S7VWJ7] | transcript_product=serine/threonine specific protein phosphatase | location=TGGT1_chrIX:4886317-4901581(-) | protein_length=2883 | sequence_SO=chromosome | SO=protein_coding_gene | is_pseudo=false	0	15.01	2	4	15	4	2883	303.5	9.6	2.23	4	1.702	1.524	0.77	0.61	0.239617	0.141378	0.818354	0.626104	16	11.05	0.77	0.6	0.92	0.61	0.71	-0.06	649755	567829	325707	20.67	31.2	12.64	649755	453593	679733	605590	567829	319743	298174	325707	243388	393178	532755	741808
FALSE	High	Master Protein	TGGT1_260820-t26_1-p1	transcript=TGGT1_260820-t26_1 | gene=TGGT1_260820 | organism=Toxoplasma_gondii_GT1 | gene_product=ISP1_C domain-containing protein [Source:UniProtKB/TrEMBL;Acc:A0A125YZB3] | transcript_product=IMC sub-compartment protein ISP1 | location=TGGT1_chrVIIb:2000787-2002966(-) | protein_length=176 | sequence_SO=chromosome | SO=protein_coding_gene | is_pseudo=false	0	14.967	31	3	4	3	176	19.4	7.69	5.14	3	1.057	1.234	0.08	0.3	0.815457	0.36381	0.995562	0.888356	15.6	11.45	0.08	-0.19	0.22	0.11	0.41	0.3	239322	330666	268935	20.79	20.43	8.07	227215	239322	328082	232288	330666	346679	256926	268935	299973	392566	248770	194152
FALSE	High	Master Protein	TGGT1_253940-t26_1-p1	transcript=TGGT1_253940-t26_1 | gene=TGGT1_253940 | organism=Toxoplasma_gondii_GT1 | gene_product=Protein kinase domain-containing protein [Source:UniProtKB/TrEMBL;Acc:S7UMP4] | transcript_product=CAM Kinase family, incomplete catalytic triad | location=TGGT1_chrIII:1334859-1341615(-) | protein_length=567 | sequence_SO=chromosome | SO=protein_coding_gene | is_pseudo=false	0	14.912	13	5	9	5	567	64.4	9.72	0	5	1.642	1.334	0.72	0.42	0.284324	0.264086	0.885993	0.814268	63.12	35.75	1.67	0.72	-0.08	0.42	0.73	-0.72	420484	259010	222907	35.04	42.23	14.08	433939	420484	211804	259010	417016	180332	196371	342329	141292	222907	270176	591511
FALSE	High	Master Protein	TGGT1_275440-t26_1-p1	transcript=TGGT1_275440-t26_1 | gene=TGGT1_275440 | organism=Toxoplasma_gondii_GT1 | gene_product=Dense granule protein GRA6 [Source:UniProtKB/TrEMBL;Acc:S7UQL8] | transcript_product=dense granule protein GRA6 | location=TGGT1_chrX:7158307-7158999(-) | protein_length=223 | sequence_SO=chromosome | SO=protein_coding_gene | is_pseudo=false	0	14.911	23	4	19	4	223	23.3	5.66	19.22	4	0.87	1.513	-0.2	0.6	0.419446	0.146503	0.949873	0.634847	51.15	55.03	0.41	-0.68	-0.2	1.05	0.6	-0.51	1.27735e+06	1.6178e+06	1.37632e+06	28.65	73.16	36.89	1.76129e+06	999177	1.27735e+06	1.6178e+06	1.83779e+06	196895	722091	1.50434e+06	1.16053e+06	1.59438e+06	1.37632e+06	1.72877e+06
FALSE	High	Master Protein	TGGT1_209860-t26_1-p1	transcript=TGGT1_209860-t26_1 | gene=TGGT1_209860 | organism=Toxoplasma_gondii_GT1 | gene_product=SRP40_C domain-containing protein [Source:UniProtKB/TrEMBL;Acc:S7VXU1] | transcript_product=SRP40, C-terminal domain-containing protein | location=TGGT1_chrIb:1509068-1514507(+) | protein_length=424 | sequence_SO=chromosome | SO=protein_coding_gene | is_pseudo=false	0	14.857	8	2	5	2	424	47.5	9.91	8.07	2	0.998	0.729	0	-0.46	0.68836	0.621189	0.971725	0.973941	11.37	6.77	0.29	0	-0.11	-0.52	-0.46	-0.12	521780	382787	523217	5.59	34.04	4.09	559009	521780	500780	342495	382787	625839	489897	528829	755697	455945	472658	523217
FALSE	High	Master Protein	TGGT1_211300-t26_1-p1	transcript=TGGT1_211300-t26_1 | gene=TGGT1_211300 | organism=Toxoplasma_gondii_GT1 | gene_product=Putative DUF74 family protein [Source:UniProtKB/TrEMBL;Acc:S7UJQ2] | transcript_product=putative DUF74 family protein | location=TGGT1_chrIV:1777178-1778772(+) | protein_length=373 | sequence_SO=chromosome | SO=protein_coding_gene | is_pseudo=false	0	14.838	12	4	19	4	373	39.7	9.58	13.53	4	1.471	1.269	0.56	0.34	0.456626	0.325956	0.949873	0.875727	34.85	21.09	0.86	-0.32	0.56	1.13	0.34	0.12	1.31288e+06	1.37167e+06	899241	24.1	28.84	7.65	1.71288e+06	1.06183e+06	1.31288e+06	1.85075e+06	1.37167e+06	1.03605e+06	982025	1.14118e+06	935488	1.12045e+06	816587	843984
FALSE	High	Master Protein	TGGT1_258630-t26_1-p1	transcript=TGGT1_258630-t26_1 | gene=TGGT1_258630 | organism=Toxoplasma_gondii_GT1 | gene_product=hypothetical protein | transcript_product=hypothetical protein | location=TGGT1_chrVIIb:3258493-3261947(-) | protein_length=540 | sequence_SO=chromosome | SO=protein_coding_gene | is_pseudo=false	0	14.601	12	4	6	4	540	58.2	9.67	7.12	4	0.987	1.01	-0.02	0.01	0.662991	0.708952	0.971725	0.973941	36.34	6.96	0.39	-0.51	-0.02	-0.06	0.14	0.01	612948	525888	490220	27.73	11.43	9.07	612948	431350	765448	471418	592359	525888	517451	559473	427729	467385	490220	685353
FALSE	High	Master Protein	TGGT1_270380-t26_1-p1	transcript=TGGT1_270380-t26_1 | gene=TGGT1_270380 | organism=Toxoplasma_gondii_GT1 | gene_product=Ribosomal_S13_N domain-containing protein [Source:UniProtKB/TrEMBL;Acc:S7V498] | transcript_product=ribosomal protein RPS13 | location=TGGT1_chrVIII:5238468-5240728(-) | protein_length=151 | sequence_SO=chromosome | SO=protein_coding_gene | is_pseudo=false	0	14.585	30	4	30	4	151	17.2	10.55	32.54	4	1.16	0.672	0.21	-0.57	0.965841	0.475963	0.995562	0.928877	15.11	19.67	0.06	0.71	0.21	-0.96	-0.57	-0.37	2.77112e+06	1.45179e+06	2.42443e+06	6.94	25.25	11.88	2.74275e+06	3.10146e+06	2.77112e+06	1.45179e+06	1.16402e+06	1.92047e+06	1.91368e+06	1.36714e+06	2.42443e+06	2.57855e+06	2.57505e+06	3.28663e+06
FALSE	High	Master Protein	TGGT1_290950-t26_1-p1	transcript=TGGT1_290950-t26_1 | gene=TGGT1_290950 | organism=Toxoplasma_gondii_GT1 | gene_product=Clathrin heavy chain [Source:UniProtKB/TrEMBL;Acc:A0A125YSB0] | transcript_product=putative clathrin heavy chain | location=TGGT1_chrIX:3770246-3782423(-) | protein_length=1731 | sequence_SO=chromosome | SO=protein_coding_gene | is_pseudo=false	0	14.3	3	4	4	4	1731	194.4	6.06	4.01	4	0.85	0.87	-0.23	-0.2	0.381245	0.981363	0.949873	0.988723	0.11	2.83	-0.04	-0.24	-0.23	-0.23	-0.02	-0.2	330028	339847	306813	17.9	12.08	16.32	330028	239618	336131	339847	286543	364656	472774	342898	456599	267659	306813	389911
FALSE	High	Master Protein	TGGT1_267740-t26_1-p1	transcript=TGGT1_267740-t26_1 | gene=TGGT1_267740 | organism=Toxoplasma_gondii_GT1 | gene_product=hypothetical protein | transcript_product=hypothetical protein | location=TGGT1_chrIX:229747-230769(+) | protein_length=340 | sequence_SO=chromosome | SO=protein_coding_gene | is_pseudo=false	0	14.28	12	2	20	2	340	37	9.36	32.42	2	0.819	1.15	-0.29	0.2	0.324624	0.471256	0.931128	0.927945	0.34	31.62	-0.29	-0.29	-0.09	0.2	0.48	-1.07	1.41832e+06	1.99529e+06	1.73187e+06	23.74	49.87	25.25	1.41832e+06	1.30354e+06	2.00052e+06	1.99529e+06	2.62014e+06	834824	1.72678e+06	2.05952e+06	1.17325e+06	1.73187e+06	1.97403e+06	2.53414e+06
FALSE	High	Master Protein	TGGT1_291670-t26_1-p1	transcript=TGGT1_291670-t26_1 | gene=TGGT1_291670 | organism=Toxoplasma_gondii_GT1 | gene_product=DEAD/DEAH box helicase domain-containing protein [Source:UniProtKB/TrEMBL;Acc:S7W411] | transcript_product=DEAD/DEAH box helicase domain-containing protein | location=TGGT1_chrIX:4126257-4128305(-) | protein_length=682 | sequence_SO=chromosome | SO=protein_coding_gene | is_pseudo=false	0	14.217	9	4	13	4	682	74.7	9.64	7.37	4	1.28	0.593	0.36	-0.75	0.738105	0.296556	0.981806	0.841634	15.89	30.15	-0.08	0.36	0.5	-1.16	-0.75	-0.43	1.06961e+06	350188	898101	40.42	19.27	29.1	551830	1.06961e+06	1.33499e+06	270287	400319	350188	700042	573254	430428	967374	1.07575e+06	947289
FALSE	High	Master Protein	TGGT1_217540-t26_1-p1	transcript=TGGT1_217540-t26_1 | gene=TGGT1_217540 | organism=Toxoplasma_gondii_GT1 | gene_product=RNA recognition motif-containing protein [Source:UniProtKB/TrEMBL;Acc:S7WAA2] | transcript_product=RNA recognition motif-containing protein | location=TGGT1_chrXII:1835563-1837479(-) | protein_length=351 | sequence_SO=chromosome | SO=protein_coding_gene | is_pseudo=false	0	13.841	12	3	7	3	351	38.1	9.61	7.67	3	1.055	0.575	0.08	-0.8	0.812637	0.260359	0.995562	0.812006	26.99	5.65	0.08	0.45	-0.21	-0.74	-0.8	-1.48	461975	238144	510103	19.61	27.69	4.87	461975	582893	397195	271631	238144	152975	330458	249700	214005	510103	605235	633616
FALSE	High	Master Protein	TGGT1_215160-t26_1-p1	transcript=TGGT1_215160-t26_1 | gene=TGGT1_215160 | organism=Toxoplasma_gondii_GT1 | gene_product=hypothetical protein | transcript_product=hypothetical protein | location=TGGT1_chrX:6680496-6681765(+) | protein_length=269 | sequence_SO=chromosome | SO=protein_coding_gene | is_pseudo=false	0	13.832	14	4	36	4	269	31.2	9.09	43.75	4	1.266	1.429	0.34	0.52	0.763333	0.193727	0.995562	0.706566	8.6	8.82	0.34	0.42	0.08	0.6	0.52	0.33	4.03592e+06	4.57244e+06	3.40076e+06	5.23	7.4	9.39	4.03985e+06	4.03592e+06	3.68268e+06	4.6345e+06	4.57244e+06	4.03991e+06	3.52158e+06	4.00933e+06	3.76772e+06	2.98201e+06	3.40076e+06	4.26196e+06
FALSE	High	Master Protein	TGGT1_297650-t26_1-p1	transcript=TGGT1_297650-t26_1 | gene=TGGT1_297650 | organism=Toxoplasma_gondii_GT1 | gene_product=Metallophos domain-containing protein [Source:UniProtKB/TrEMBL;Acc:S7UJX7] | transcript_product=Ser/Thr phosphatase family protein | location=TGGT1_chrII:1870431-1877352(-) | protein_length=651 | sequence_SO=chromosome | SO=protein_coding_gene | is_pseudo=false	0	13.811	6	3	8	3	651	72.5	9.31	4.68	3	1.523	1.899	0.61	0.93	0.396309	0.0396226	0.949873	0.268715	23.35	9.78	0.61	0.92	0.36	0.93	1.02	0.53	486072	562525	272267	5.41	19	18.98	444104	486072	490566	562525	566362	397077	304742	315066	291305	128889	272267	273716
FALSE	High	Master Protein	TGGT1_300280-t26_1-p1	transcript=TGGT1_300280-t26_1 | gene=TGGT1_300280 | organism=Toxoplasma_gondii_GT1 | gene_product=Sm domain-containing protein [Source:UniProtKB/TrEMBL;Acc:S7UFN1] | transcript_product=LSM domain-containing protein | location=TGGT1_chrXII:70960-73566(-) | protein_length=169 | sequence_SO=chromosome | SO=protein_coding_gene | is_pseudo=false	0	13.749	29	4	12	4	169	17.9	10.92	5.94	4	1.44	0.745	0.53	-0.42	0.495229	0.66327	0.951523	0.973941	2.63	16.62	0.53	0.55	0.09	-0.42	-0.08	-0.58	997633	583455	923382	14.27	5.84	15.32	1.24859e+06	971209	997633	633593	566942	583455	530447	471719	615823	822227	960348	1.1097e+06
FALSE	High	Master Protein	TGGT1_267060-t26_1-p1	transcript=TGGT1_267060-t26_1 | gene=TGGT1_267060 | organism=Toxoplasma_gondii_GT1 | gene_product=Ribosomal_L14e domain-containing protein [Source:UniProtKB/TrEMBL;Acc:S7VPP6] | transcript_product=ribosomal protein RPL14 | location=TGGT1_chrIX:634719-636622(+) | protein_length=157 | sequence_SO=chromosome | SO=protein_coding_gene | is_pseudo=false	0	13.718	24	4	21	4	157	17.9	10.77	23.13	4	1.257	0.695	0.33	-0.53	0.778758	0.533628	0.995562	0.960964	11.07	43.78	0.43	0.33	-0.15	-0.9	-0.53	0.03	1.31022e+06	651449	1.06118e+06	17.33	38.77	9.87	1.62588e+06	1.31022e+06	1.1624e+06	629800	651449	1.19447e+06	728991	658110	1.21237e+06	1.06118e+06	1.32562e+06	1.36639e+06
FALSE	High	Master Protein	TGGT1_215460-t26_1-p1	transcript=TGGT1_215460-t26_1 | gene=TGGT1_215460 | organism=Toxoplasma_gondii_GT1 | gene_product=40S ribosomal protein S24 [Source:UniProtKB/TrEMBL;Acc:S7UQS1] | transcript_product=ribosomal protein RPS24 | location=TGGT1_chrX:6863478-6865141(-) | protein_length=267 | sequence_SO=chromosome | SO=protein_coding_gene | is_pseudo=false	0	13.681	12	3	24	3	267	30.4	11.08	17.97	3	1.424	0.583	0.51	-0.78	0.516215	0.276321	0.951523	0.818481	7.77	0.76	0.51	0.58	-0.01	-0.79	-0.78	0.05	1.81947e+06	939155	1.43988e+06	15.28	26.47	11	2.14809e+06	1.81947e+06	1.58507e+06	939155	767867	1.28629e+06	1.29455e+06	942277	1.53349e+06	1.43988e+06	1.59988e+06	1.52472e+06
FALSE	High	Master Protein	TGGT1_227620-t26_1-p1	transcript=TGGT1_227620-t26_1 | gene=TGGT1_227620 | organism=Toxoplasma_gondii_GT1 | gene_product=Dense granule protein GRA2 [Source:UniProtKB/TrEMBL;Acc:S7UXS8] | transcript_product=dense granule protein GRA2 | location=TGGT1_chrX:779857-780655(-) | protein_length=185 | sequence_SO=chromosome | SO=protein_coding_gene | is_pseudo=false	0	13.657	22	4	30	4	185	19.8	9	27.06	4	1.134	0.787	0.18	-0.35	0.980353	0.771707	0.998872	0.978242	7.13	16.22	0.11	0.27	0.18	-0.35	-0.18	-0.88	2.06051e+06	1.31619e+06	2.13409e+06	22.04	29.72	33.4	2.06051e+06	2.64206e+06	1.70947e+06	903488	1.67427e+06	1.31619e+06	748921	1.56999e+06	2.13409e+06	1.46102e+06	2.25865e+06	3.44647e+06
FALSE	High	Master Protein	TGGT1_411760-t26_1-p1	transcript=TGGT1_411760-t26_1 | gene=TGGT1_411760 | organism=Toxoplasma_gondii_GT1 | gene_product=Actin [Source:UniProtKB/TrEMBL;Acc:S7VNC9] | transcript_product=actin | location=AAQM03000536:57-991(+) | protein_length=287 | sequence_SO=contig | SO=protein_coding_gene | is_pseudo=false	0	13.591	16	4	9	4	287	32	6.04	6.11	4	0.655	1.384	-0.61	0.47	0.0999868	0.224602	0.519932	0.770029	27.52	7.65	-0.31	-0.61	-0.94	0.47	0.39	1.5	542885	1.04493e+06	751751	16.74	65.56	39.55	617810	439938	542885	1.04493e+06	976320	2.85542e+06	914193	751751	1.98293e+06	711478	612800	568455
FALSE	High	Master Protein	TGGT1_305160-t26_1-p1	transcript=TGGT1_305160-t26_1 | gene=TGGT1_305160 | organism=Toxoplasma_gondii_GT1 | gene_product=Histone H2B [Source:UniProtKB/TrEMBL;Acc:A0A125YHE1] | transcript_product=histone H2Ba | location=TGGT1_chrIX:5039074-5039424(+) | protein_length=116 | sequence_SO=chromosome | SO=protein_coding_gene | is_pseudo=false	0	13.532	25	3	75	3	116	12.6	10.1	124.19	3	0.81	0.274	-0.3	-1.87	0.309115	0.001916	0.912625	0.0214486	6.04	33.74	-0.15	-0.3	-0.36	-1.87	-2.16	-1.36	3.47235e+07	1.02652e+07	4.4818e+07	15.63	34.49	5.17	3.86985e+07	3.47235e+07	2.82112e+07	1.02652e+07	9.81494e+06	1.75166e+07	1.68033e+07	1.32472e+07	1.89342e+07	4.66096e+07	4.4818e+07	5.61758e+07
FALSE	High	Master Protein	TGGT1_305920-t26_1-p1	transcript=TGGT1_305920-t26_1 | gene=TGGT1_305920 | organism=Toxoplasma_gondii_GT1 | gene_product=Endonuclease III homolog [Source:UniProtKB/TrEMBL;Acc:S7VQV5] | transcript_product=endonuclease III family 1 protein | location=TGGT1_chrIX:5449193-5455691(+) | protein_length=693 | sequence_SO=chromosome | SO=protein_coding_gene | is_pseudo=false	0	13.425	6	3	13	3	693	75.8	9.26	9.42	3	1.549	0.478	0.63	-1.07	0.369109	0.105061	0.938934	0.546318	5.18	1.39	0.63	0.88	0.58	-1.05	-1.07	-1.21	456283	54441.3	361578	18.45	59.77	15.28	463522	327189	456283	40381.7	120823	54441.3	134637	105111	69149.5	286555	361578	388448
FALSE	High	Master Protein	TGGT1_243540-t26_1-p1	transcript=TGGT1_243540-t26_1 | gene=TGGT1_243540 | organism=Toxoplasma_gondii_GT1 | gene_product=WD_REPEATS_REGION domain-containing protein [Source:UniProtKB/TrEMBL;Acc:S7VMQ4] | transcript_product=WD domain, G-beta repeat-containing protein | location=TGGT1_chrVI:2620984-2624695(-) | protein_length=711 | sequence_SO=chromosome | SO=protein_coding_gene | is_pseudo=false	0	13.373	6	3	5	3	711	77.2	6.61	6.83	3	1.249	0.444	0.32	-1.17	0.794537	0.069119	0.995562	0.397663	12.21	5.96	0.32	0.2	0.48	-1.17	-0.8	-1.23	362887	108634	313171	16.15	33.89	31.81	452656	333965	362887	103380	108634	183214	123550	156595	119552	288197	313171	502175
FALSE	High	Master Protein	TGGT1_277910-t26_1-p1	transcript=TGGT1_277910-t26_1 | gene=TGGT1_277910 | organism=Toxoplasma_gondii_GT1 | gene_product=Thrombospondin type 1 domain-containing protein [Source:UniProtKB/TrEMBL;Acc:S7W8J3] | transcript_product=thrombospondin type 1 domain-containing protein | location=TGGT1_chrXII:6346830-6352604(+) | protein_length=1218 | sequence_SO=chromosome | SO=protein_coding_gene | is_pseudo=false	0	13.341	5	5	15	5	1218	133.3	8.97	5.96	5	0.808	0.658	-0.31	-0.6	0.305399	0.443029	0.912625	0.924827	7.53	24.54	-0.31	-0.23	-0.54	-0.6	-0.85	-0.34	437014	348409	463450	4.62	29.9	16.41	437014	456439	416121	348409	285151	505648	412712	421589	585945	463450	432698	560766
FALSE	High	Master Protein	TGGT1_203600-t26_1-p1	transcript=TGGT1_203600-t26_1 | gene=TGGT1_203600 | organism=Toxoplasma_gondii_GT1 | gene_product=hypothetical protein | transcript_product=hypothetical protein | location=TGGT1_chrVIIa:2307958-2309277(-) | protein_length=439 | sequence_SO=chromosome | SO=protein_coding_gene | is_pseudo=false	0	13.064	16	4	7	4	439	47.3	8.25	3.18	4	1.402	1.256	0.49	0.33	0.545973	0.339126	0.956387	0.876075	29.2	25.89	0.17	0.98	0.49	0.33	0.56	-0.1	897170	725604	602486	17.58	12.35	23.73	683869	897170	972335	754076	725604	594040	489174	426130	425308	683848	871128	973876
FALSE	High	Master Protein	TGGT1_201130-t26_1-p1	transcript=TGGT1_201130-t26_1 | gene=TGGT1_201130 | organism=Toxoplasma_gondii_GT1 | gene_product=Protein kinase domain-containing protein [Source:UniProtKB/TrEMBL;Acc:S7UV83] | transcript_product=rhoptry kinase family protein ROP33 | location=TGGT1_chrVIIa:3922773-3926189(+) | protein_length=746 | sequence_SO=chromosome | SO=protein_coding_gene | is_pseudo=false	0	13.032	6	3	10	3	746	80.1	5.87	10.92	3	1.007	1.216	0.01	0.28	0.70649	0.384419	0.971725	0.895497	14.91	50.69	0.01	0.15	-0.2	0.28	0.71	-0.79	553276	701298	602606	15.47	34.64	15.54	639298	468047	553276	701298	780632	375837	498647	526835	477125	672817	700373	797032
FALSE	High	Master Protein	TGGT1_241170-t26_1-p1	transcript=TGGT1_241170-t26_1 | gene=TGGT1_241170 | organism=Toxoplasma_gondii_GT1 | gene_product=hypothetical protein | transcript_product=hypothetical protein | location=TGGT1_chrVI:1639455-1643673(+) | protein_length=1275 | sequence_SO=chromosome | SO=protein_coding_gene | is_pseudo=false	0	12.841	5	4	14	4	1275	139.5	9.26	4.8	4	1.148	0.622	0.2	-0.69	0.989589	0.358028	0.998872	0.888356	14.09	18.42	0.06	0.77	0.2	-0.69	-0.29	-0.85	1.25488e+06	694312	1.00553e+06	20.29	9.91	21.45	939328	1.25488e+06	1.42064e+06	694312	600325	729762	1.16908e+06	821755	1.17449e+06	1.00553e+06	756953	1.41475e+06
FALSE	High	Master Protein	TGGT1_244460-t26_1-p1	transcript=TGGT1_244460-t26_1 | gene=TGGT1_244460 | organism=Toxoplasma_gondii_GT1 | gene_product=hypothetical protein | transcript_product=hypothetical protein | location=TGGT1_chrVI:3193064-3199038(-) | protein_length=1239 | sequence_SO=chromosome | SO=protein_coding_gene | is_pseudo=false	0	12.82	3	3	8	3	1239	127.2	8.41	6.75	3	0.682	0.568	-0.55	-0.82	0.126511	0.246332	0.592838	0.800552	91.61	16.92	1.02	-0.55	-1.25	-0.82	-0.64	-1.57	1.24697e+06	876230	2.797e+06	70.06	44.56	38.55	3.43789e+06	1.02537e+06	1.24697e+06	644830	1.51558e+06	876230	948176	1.84969e+06	2.54242e+06	4.85787e+06	233749	5.31127e+06
FALSE	High	Master Protein	TGGT1_214575-t26_1-p1	transcript=TGGT1_214575-t26_1 | gene=TGGT1_214575 | organism=Toxoplasma_gondii_GT1 | gene_product=hypothetical protein | transcript_product=hypothetical protein | location=TGGT1_chrX:6262414-6262784(+) | protein_length=92 | sequence_SO=chromosome | SO=protein_coding_gene | is_pseudo=false	0	12.757	20	1	12	1	92	10.3	8.92	14.7	1	1.231	1.119	0.3	0.16	0.827943	0.517565	0.995562	0.960964	31.04	2.38	0.59	0.3	-0.04	0.66	0.16	0.14	414066	376443	326938	26.57	24.77	7.29	493584	414066	284451	516251	376443	321829	326938	336480	275129	294948	347668	395618
FALSE	High	Master Protein	TGGT1_259260-t26_1-p1	transcript=TGGT1_259260-t26_1 | gene=TGGT1_259260 | organism=Toxoplasma_gondii_GT1 | gene_product=AAA domain-containing protein [Source:UniProtKB/TrEMBL;Acc:A0A125YKJ7] | transcript_product=membrane protein FtsH1 | location=TGGT1_chrVIIb:2788863-2795704(-) | protein_length=1250 | sequence_SO=chromosome | SO=protein_coding_gene | is_pseudo=false	0	12.739	5	4	8	4	1250	136.9	7.11	2.18	4	2.2	1.186	1.14	0.25	0.053085	0.422318	0.363235	0.920068	42.33	31.78	1.83	1.14	0.65	-0.1	0.8	0.25	650902	228839	293028	28.92	61.01	12.82	887155	650902	497574	212746	580586	228839	270390	311786	293028	242920	313475	428646
FALSE	High	Master Protein	TGGT1_207440-t26_1-p1	transcript=TGGT1_207440-t26_1 | gene=TGGT1_207440 | organism=Toxoplasma_gondii_GT1 | gene_product=S4 RNA-binding domain-containing protein [Source:UniProtKB/TrEMBL;Acc:A0A125YYJ0] | transcript_product=ribosomal protein RPS4 | location=TGGT1_chrIb:77395-80548(-) | protein_length=312 | sequence_SO=chromosome | SO=protein_coding_gene | is_pseudo=false	0	12.727	11	4	23	4	312	35.5	10.18	23.14	4	1.609	0.775	0.69	-0.37	0.31234	0.739583	0.915853	0.976829	27.01	9.67	0.69	0.93	-0.15	-0.46	-0.37	-0.05	1.21719e+06	620709	858613	17.27	42.56	23.1	1.47535e+06	1.21719e+06	1.04769e+06	620709	511908	1.10893e+06	699843	590173	1.26947e+06	858613	891589	1.10977e+06
FALSE	High	Master Protein	TGGT1_305750-t26_1-p1	transcript=TGGT1_305750-t26_1 | gene=TGGT1_305750 | organism=Toxoplasma_gondii_GT1 | gene_product=Nucleolar GTP-binding protein 2 [Source:UniProtKB/TrEMBL;Acc:S7UI53] | transcript_product=putative nucleolar gtp-binding protein 2 | location=TGGT1_chrIX:5323820-5332283(+) | protein_length=641 | sequence_SO=chromosome | SO=protein_coding_gene | is_pseudo=false	0	12.656	7	5	9	5	641	71	9.51	5.75	5	1.605	0.864	0.68	-0.21	0.316262	0.965791	0.920242	0.987776	37.6	3.4	0.68	1.18	0.26	-0.21	-0.24	0.36	717028	314720	469538	23.57	100.78	18.63	717028	1.00089e+06	650489	314720	159684	1.20524e+06	412069	154728	572529	446014	469538	621904
FALSE	High	Master Protein	TGGT1_206590-t26_1-p1	transcript=TGGT1_206590-t26_1 | gene=TGGT1_206590 | organism=Toxoplasma_gondii_GT1 | gene_product=Calcium-dependent protein kinase CDPK2A [Source:UniProtKB/TrEMBL;Acc:S7W2U0] | transcript_product=calcium-dependent protein kinase CDPK2A | location=TGGT1_chrVIIa:775466-782202(-) | protein_length=786 | sequence_SO=chromosome | SO=protein_coding_gene | is_pseudo=false	0	12.61	8	5	23	5	786	86.3	8.76	16.21	5	1.076	0.758	0.11	-0.4	0.858366	0.695682	0.995562	0.973941	5.33	1.5	0.16	-0.61	0.11	-0.4	-0.39	-1.02	1.19454e+07	1.54585e+07	1.53561e+07	27.81	13.43	2.8	1.47169e+07	8.26245e+06	1.19454e+07	1.60549e+07	1.54585e+07	1.23928e+07	2.01513e+07	1.47698e+07	1.53561e+07	1.51219e+07	1.17731e+07	1.45359e+07
FALSE	High	Master Protein	TGGT1_225080-t26_1-p1	transcript=TGGT1_225080-t26_1 | gene=TGGT1_225080 | organism=Toxoplasma_gondii_GT1 | gene_product=Ribosomal protein RPS18 [Source:UniProtKB/TrEMBL;Acc:A0A125YQT9] | transcript_product=ribosomal protein RPS18 | location=TGGT1_chrX:2450681-2451929(+) | protein_length=156 | sequence_SO=chromosome | SO=protein_coding_gene | is_pseudo=false	0	12.54	25	4	25	4	156	17.7	10.61	23.36	4	1.125	0.917	0.17	-0.12	0.961312	0.906604	0.995562	0.987776	9.86	9.78	0.35	0.17	0.07	-0.41	-0.12	-0.03	2.43681e+06	1.78711e+06	2.08137e+06	11.37	16.07	7.92	2.93422e+06	2.41095e+06	2.43681e+06	1.64478e+06	1.78711e+06	2.22624e+06	2.63856e+06	1.94547e+06	2.62181e+06	2.04814e+06	2.12447e+06	2.34018e+06
FALSE	High	Master Protein	TGGT1_292245-t26_1-p1	transcript=TGGT1_292245-t26_1 | gene=TGGT1_292245 | organism=Toxoplasma_gondii_GT1 | gene_product=hypothetical protein | transcript_product=hypothetical protein | location=TGGT1_chrIX:4448402-4448902(+) | protein_length=166 | sequence_SO=chromosome | SO=protein_coding_gene | is_pseudo=false	0	12.521	15	1	4	1	166	17.1	11.46	8.68	1	1.076	8.321	0.11	3.06	0.857377	2.04179e-09	0.995562	3.82717e-08	146.88	363.64	6.64	0.11	-6.64		0.71	5.41	341195	599127	71999.5	18.8	1.86	130.69	298489	390010			591283	607075		362493	14595.1
FALSE	High	Master Protein	TGGT1_292235-t26_1-p1	transcript=TGGT1_292235-t26_1 | gene=TGGT1_292235 | organism=Toxoplasma_gondii_GT1 | gene_product=RING-type domain-containing protein [Source:UniProtKB/TrEMBL;Acc:S7UQ35] | transcript_product=hypothetical protein | location=TGGT1_chrIX:4439011-4446274(-) | protein_length=1451 | sequence_SO=chromosome | SO=protein_coding_gene | is_pseudo=false	0	12.481	3	5	17	5	1451	154.4	8.44	7.17	5	1.752	0.676	0.81	-0.57	0.206896	0.486553	0.782904	0.933327	37.44	17.66	1.13	0.81	0.1	-0.57	-0.38	-0.77	806217	295731	545530	35.97	18.51	19.81	1.28808e+06	806217	656950	276412	295731	387229	284141	390882	487847	573906	598946	799016
FALSE	High	Master Protein	TGGT1_237150-t26_1-p1	transcript=TGGT1_237150-t26_1 | gene=TGGT1_237150 | organism=Toxoplasma_gondii_GT1 | gene_product=Putative minor histocompatibility antigen h13 [Source:UniProtKB/TrEMBL;Acc:S7UR45] | transcript_product=putative minor histocompatibility antigen h13 | location=TGGT1_chrX:5632583-5637249(-) | protein_length=417 | sequence_SO=chromosome | SO=protein_coding_gene | is_pseudo=false	0	12.436	6	2	13	2	417	46.2	6.47	25.98	2	1.057	0.832	0.08	-0.26	0.81718	0.887516	0.995562	0.987776	11.87	8.93	0.08	-0.41	0.19	-0.35	-0.04	-0.26	968273	750008	892540	40.22	4.99	2.69	968273	579881	1.35939e+06	750008	813183	743749	777117	734376	748803	930934	892540	886049
FALSE	High	Master Protein	TGGT1_231140-t26_1-p1	transcript=TGGT1_231140-t26_1 | gene=TGGT1_231140 | organism=Toxoplasma_gondii_GT1 | gene_product=40S ribosomal protein S25 [Source:UniProtKB/TrEMBL;Acc:S7V273] | transcript_product=ribosomal protein RPS25 | location=TGGT1_chrVIII:1259763-1260788(+) | protein_length=161 | sequence_SO=chromosome | SO=protein_coding_gene | is_pseudo=false	0	12.35	26	4	18	3	161	18.7	10.33	16.98	4	1.014	1.003	0.02	0.01	0.723451	0.720866	0.981806	0.974862	26.95	10	0.48	0.02	-0.27	-0.1	0.01	0.18	493824	431830	549745	25.42	37.67	36.35	658300	398588	493824	431830	426962	787359	610032	549745	935059	308306	416716	400472
FALSE	High	Master Protein	TGGT1_258000-t26_1-p1	transcript=TGGT1_258000-t26_1 | gene=TGGT1_258000 | organism=Toxoplasma_gondii_GT1 | gene_product=hypothetical protein | transcript_product=hypothetical protein | location=TGGT1_chrVIIb:3626207-3633296(+) | protein_length=1260 | sequence_SO=chromosome | SO=protein_coding_gene | is_pseudo=false	0	12.334	5	5	6	5	1260	134.5	9.39	3.8	5	1.685	0.913	0.75	-0.13	0.251433	0.915069	0.838715	0.987776	3.07	33.84	0.78	0.75	0.4	-0.13	0.41	-0.43	794867	357525	428083	18.45	31.85	19.36	855560	794867	592197	348327	591281	357525	337583	527357	324880	428083	481619	674841
FALSE	High	Master Protein	TGGT1_267750-t26_1-p1	transcript=TGGT1_267750-t26_1 | gene=TGGT1_267750 | organism=Toxoplasma_gondii_GT1 | gene_product=hypothetical protein | transcript_product=hypothetical protein | location=TGGT1_chrIX:218329-226396(+) | protein_length=1643 | sequence_SO=chromosome | SO=protein_coding_gene | is_pseudo=false	0	12.287	3	4	6	4	1643	175.2	8.22	4.17	4	1.443	0.852	0.53	-0.23	0.490812	0.936381	0.951523	0.987776	3	12.32	0.56	0.53	-0.25	0.32	-0.35	-0.23	179639	70072.9	67697.3	62.29	16.86	35.75	179639	202904	40481.7	91061.5	70072.9	67696.2	28274.5	67697.3	73671.9	34711.4	39952.7	48291.3
FALSE	High	Master Protein	TGGT1_223050-t26_1-p1	transcript=TGGT1_223050-t26_1 | gene=TGGT1_223050 | organism=Toxoplasma_gondii_GT1 | gene_product=Ribosomal_S10 domain-containing protein [Source:UniProtKB/TrEMBL;Acc:S7UL41] | transcript_product=ribosomal protein RPS20 | location=TGGT1_chrII:1366681-1368519(+) | protein_length=233 | sequence_SO=chromosome | SO=protein_coding_gene | is_pseudo=false	0	12.285	18	4	18	4	233	25.8	9.52	8.92	4	1.231	0.746	0.3	-0.42	0.827383	0.665069	0.995562	0.973941	54.28	35.2	0.85	0.3	-0.36	-0.73	-0.42	0.01	1.06015e+06	597109	935020	36.7	56.37	32.56	1.7646e+06	908764	1.06015e+06	557725	597109	1.41222e+06	625078	802608	1.50643e+06	935020	937566	1.30659e+06
FALSE	High	Master Protein	TGGT1_247470-t26_1-p1	transcript=TGGT1_247470-t26_1 | gene=TGGT1_247470 | organism=Toxoplasma_gondii_GT1 | gene_product=Nop domain-containing protein [Source:UniProtKB/TrEMBL;Acc:A0A125YGZ6] | transcript_product=putative nucleolar protein | location=TGGT1_chrXII:3291010-3295334(+) | protein_length=536 | sequence_SO=chromosome | SO=protein_coding_gene | is_pseudo=false	0	12.275	8	4	7	4	536	59.9	8.15	1.84	4	0.917	0.618	-0.12	-0.7	0.515351	0.349274	0.951523	0.883421	9.56	1.61	-0.03	-0.12	-0.57	-0.7	-0.68	-0.92	714907	335897	531682	12.95	10.21	21.18	714907	802086	617833	311597	335897	380548	247984	395914	272552	460654	531682	692878
FALSE	High	Master Protein	TGGT1_300200-t26_1-p1	transcript=TGGT1_300200-t26_1 | gene=TGGT1_300200 | organism=Toxoplasma_gondii_GT1 | gene_product=Histone H2A [Source:UniProtKB/TrEMBL;Acc:A0A125YP80] | transcript_product=histone H2AZ | location=TGGT1_chrXII:122117-123855(-) | protein_length=155 | sequence_SO=chromosome | SO=protein_coding_gene | is_pseudo=false	0	12.066	26	4	74	3	155	15.9	10.62	158.54	4	1.184	0.517	0.24	-0.95	0.917273	0.158223	0.995562	0.657139	1.96	10.74	0.59	0.24	0.22	-0.95	-1.05	-0.72	5.20939e+06	2.17598e+06	6.05384e+06	35.04	12.93	28.31	8.91956e+06	5.20939e+06	4.9321e+06	2.21155e+06	1.7375e+06	2.17598e+06	3.13306e+06	2.67235e+06	2.88634e+06	6.87451e+06	5.77174e+06	6.75546e+06
FALSE	High	Master Protein	TGGT1_237180-t26_1-p1	transcript=TGGT1_237180-t26_1 | gene=TGGT1_237180 | organism=Toxoplasma_gondii_GT1 | gene_product=hypothetical protein | transcript_product=hypothetical protein | location=TGGT1_chrX:5659103-5659870(-) | protein_length=255 | sequence_SO=chromosome | SO=protein_coding_gene | is_pseudo=false	0	12.022	12	3	5	3	255	29.2	8.97	5.1	3	1.317	3.087	0.4	1.63	0.676639	0.000803002	0.971725	0.0102733	20.07	59.63	0.06	0.58	0.4	1.63	2.11	0.43	269443	964972	128025	46.89	42.41	62.8	409497	269443	150481	964972	1.06938e+06	422465	393072	324069	388511	101066	89275.4	340469
FALSE	High	Master Protein	TGGT1_248810-t26_1-p1	transcript=TGGT1_248810-t26_1 | gene=TGGT1_248810 | organism=Toxoplasma_gondii_GT1 | gene_product=Nuclear factor NF7 [Source:UniProtKB/TrEMBL;Acc:S7V0H2] | transcript_product=nuclear factor NF7 | location=TGGT1_chrXII:4119880-4123828(+) | protein_length=497 | sequence_SO=chromosome | SO=protein_coding_gene | is_pseudo=false	0	12.022	7	3	3	3	497	54.2	7.02	2.61	3	0.932	0.41	-0.1	-1.29	0.544971	0.0427195	0.956387	0.282229	41.14	16.68	0.37	-0.1	-0.99	-1.29	-1.44	-0.91	267577	69080.2	302401	46.82	67.49	38.95	452421	177656	267577	69080.2	30419.3	134602	74673.7	67766.9	161164	302401	396820	613965
FALSE	High	Master Protein	TGGT1_273460-t26_1-p1	transcript=TGGT1_273460-t26_1 | gene=TGGT1_273460 | organism=Toxoplasma_gondii_GT1 | gene_product=Eukaryotic translation initiation factor 3 subunit L [Source:UniProtKB/TrEMBL;Acc:A0A125YVE2] | transcript_product=eukaryotic translation initiation factor 3 subunit 6 interacting protein | location=TGGT1_chrVIII:3489847-3495730(-) | protein_length=639 | sequence_SO=chromosome | SO=protein_coding_gen…	0	11.929	5	2	8	2	639	75	5.71	9.24	2	2.831	0.93	1.5	-0.1	0.0073518	0.87626	0.0940564	0.987776	61.69	29.95	0.73	1.5	2.26		-0.39	0.19	507227	42325.4	106720	12.71	55.44	23.17	443707	507227	572817	39926.3	42325.4	99156.9	25504.3	95105.1	106720	149194	125276	416542
FALSE	High	Master Protein	TGGT1_255440-t26_1-p1	transcript=TGGT1_255440-t26_1 | gene=TGGT1_255440 | organism=Toxoplasma_gondii_GT1 | gene_product=hypothetical protein | transcript_product=hypothetical protein | location=TGGT1_chrVIIb:4732506-4734913(+) | protein_length=571 | sequence_SO=chromosome | SO=protein_coding_gene | is_pseudo=false	0	11.886	6	4	11	4	571	63	9.36	5.29	4	0.87	0.716	-0.2	-0.48	0.419232	0.587416	0.949873	0.972191	12.7	12.29	-0.07	-0.75	-0.2	-0.36	-0.48	-0.6	693893	507350	759895	28.21	6.75	27.18	693893	407755	711352	521520	457822	507350	603995	536273	644473	759895	671752	1.22332e+06
FALSE	High	Master Protein	TGGT1_313080-t26_1-p1	transcript=TGGT1_313080-t26_1 | gene=TGGT1_313080 | organism=Toxoplasma_gondii_GT1 | gene_product=hypothetical protein | transcript_product=hypothetical protein | location=TGGT1_chrXI:3049384-3050751(-) | protein_length=455 | sequence_SO=chromosome | SO=protein_coding_gene | is_pseudo=false	0	11.825	11	4	6	4	455	49.5	8.69	2.23	4	2.036	1.552	1.03	0.63	0.0879977	0.128656	0.482491	0.590572	7.41	25.46	1.03	0.73	1.1	0.63	1.01	0.36	838267	625858	412196	31.41	16.89	2.94	858976	458108	838267	625858	714580	507237	437944	412196	472930	430355	441748	257530
FALSE	High	Master Protein	TGGT1_201710-t26_1-p1	transcript=TGGT1_201710-t26_1 | gene=TGGT1_201710 | organism=Toxoplasma_gondii_GT1 | gene_product=WD_REPEATS_REGION domain-containing protein [Source:UniProtKB/TrEMBL;Acc:A0A125YMJ9] | transcript_product=WD domain, G-beta repeat-containing protein | location=TGGT1_chrVIIa:3734491-3738475(+) | protein_length=559 | sequence_SO=chromosome | SO=protein_coding_gene | is_pseudo=false	0	11.781	6	2	6	2	559	60.1	6.09	2.07	2	1.164	0.574	0.22	-0.8	0.958153	0.258792	0.995562	0.812006	39.1	12.65	0.63	0.22	-0.22	-0.49	-0.8	-0.92	228015	56174.2	192227	24.76	41.27	25.61	333526	217170	228015	49677.9	56174.2	102177	150490	93240.2	59777.7	172226	192227	275226
FALSE	High	Master Protein	TGGT1_217760-t26_1-p1	transcript=TGGT1_217760-t26_1 | gene=TGGT1_217760 | organism=Toxoplasma_gondii_GT1 | gene_product=EngB-type G domain-containing protein [Source:UniProtKB/TrEMBL;Acc:S7WHP3] | transcript_product=GTP-binding protein | location=TGGT1_chrXII:2030584-2037449(-) | protein_length=428 | sequence_SO=chromosome | SO=protein_coding_gene | is_pseudo=false	0	11.739	9	4	10	4	428	48.1	10.26	10.14	4	1.105	0.829	0.14	-0.27	0.918904	0.88015	0.995562	0.987776	26.12	23.24	0.14	0.57	-0.14	-0.27	0.05	-0.48	682891	460025	594844	21.18	4.94	6.36	788266	682891	511057	460025	486274	440730	537834	606947	663526	486878	529733	594844
FALSE	High	Master Protein	TGGT1_260600-t26_1-p1	transcript=TGGT1_260600-t26_1 | gene=TGGT1_260600 | organism=Toxoplasma_gondii_GT1 | gene_product=PUM-HD domain-containing protein [Source:UniProtKB/TrEMBL;Acc:S7UYD1] | transcript_product=Pumilio-family RNA binding repeat-containing protein | location=TGGT1_chrVIIb:2104300-2113824(+) | protein_length=1676 | sequence_SO=chromosome | SO=protein_coding_gene | is_pseudo=false	0	11.64	3	4	4	4	1676	172.4	7.77	3.65	4	1.811	0.608	0.86	-0.72	0.173852	0.328682	0.691058	0.875727	64.53	16.78	1.6	0.86	0.03	-0.72	-0.26	-0.87	396559	118666	261613	32.86	8.43	28.63	658095	396559	377357	118666	111270	131335	98881.7	122066	76131	247430	261613	405132
FALSE	High	Master Protein	TGGT1_218960-t26_1-p1	transcript=TGGT1_218960-t26_1 | gene=TGGT1_218960 | organism=Toxoplasma_gondii_GT1 | gene_product=AP2 domain transcription factor AP2XII-1 [Source:UniProtKB/TrEMBL;Acc:A0A125YNZ7] | transcript_product=AP2 domain transcription factor AP2XII-1 | location=TGGT1_chrXII:1115397-1126277(-) | protein_length=2283 | sequence_SO=chromosome | SO=protein_coding_gene | is_pseudo=false	0	11.605	2	5	14	5	2283	247.7	5.91	5.43	5	0.827	1.05	-0.27	0.07	0.338454	0.632081	0.938934	0.973941	7.53	2.37	0.06	-0.27	-0.35	0.07	0.09	-0.44	521175	373776	540648	19.34	11.53	23.36	669306	521175	462563	373776	439746	354052	255004	540648	414614	353083	400352	555613
FALSE	High	Master Protein	TGGT1_308970-t26_1-p1	transcript=TGGT1_308970-t26_1 | gene=TGGT1_308970 | organism=Toxoplasma_gondii_GT1 | gene_product=hypothetical protein | transcript_product=hypothetical protein | location=TGGT1_chrXI:373848-374876(+) | protein_length=342 | sequence_SO=chromosome | SO=protein_coding_gene | is_pseudo=false	0	11.55	13	3	16	3	342	38.2	8.1	2.97	3	1.294	1.484	0.37	0.57	0.71528	0.161453	0.977146	0.657229	26.77	20.74	0.07	0.37	0.61	0.76	0.57	-0.14	1.47171e+06	1.67402e+06	1.04966e+06	6.22	42.69	23.62	1.36328e+06	1.54351e+06	1.47171e+06	2.04966e+06	1.67402e+06	796445	1.52869e+06	1.31139e+06	811925	1.04966e+06	1.32163e+06	1.49489e+06
FALSE	High	Master Protein	TGGT1_232640-t26_1-p1	transcript=TGGT1_232640-t26_1 | gene=TGGT1_232640 | organism=Toxoplasma_gondii_GT1 | gene_product=RNA 2'-phosphotransferase, Tpt1/KptA family protein [Source:UniProtKB/TrEMBL;Acc:S7V3K9] | transcript_product=RNA 2'-phosphotransferase, Tpt1/KptA family protein | location=TGGT1_chrVIII:2198745-2199887(+) | protein_length=380 | sequence_SO=chromosome | SO=protein_coding_gene | is_pseudo=false	0	11.54	15	5	15	5	380	41.8	9.23	8.2	5	1.316	1.051	0.4	0.07	0.677009	0.630109	0.971725	0.973941	16.68	2.13	0.4	0.55	0.13	0.09	0.07	-0.09	727498	561750	544066	101.3	3.56	3.48	3.62564e+06	727498	660440	561750	565919	529953	452299	478819	544066	526004	563909	619215
FALSE	High	Master Protein	TGGT1_241610-t26_1-p1	transcript=TGGT1_241610-t26_1 | gene=TGGT1_241610 | organism=Toxoplasma_gondii_GT1 | gene_product=hypothetical protein | transcript_product=hypothetical protein | location=AAQM03000426:1944-3762(+) | protein_length=501 | sequence_SO=contig | SO=protein_coding_gene | is_pseudo=false	0	11.524	5	2	10	2	501	55.4	9.73	9.22	2	1.36	1.488	0.44	0.57	0.60856	0.159408	0.971725	0.657139	22.87	4.07	1.25	0.2	0.44	0.41	0.61	0.57	736374	358264	192245	40.17	54.89	18.71	808469	736374	339780	304888	789696	358264	305655	660519	179726	252556	192245	283473
FALSE	High	Master Protein	TGGT1_270830-t26_1-p1	transcript=TGGT1_270830-t26_1 | gene=TGGT1_270830 | organism=Toxoplasma_gondii_GT1 | gene_product=Small nuclear ribonucleoprotein Sm D2 [Source:UniProtKB/TrEMBL;Acc:S7V4D5] | transcript_product=small nuclear ribonucleoprotein | location=TGGT1_chrVIII:4965286-4968969(-) | protein_length=155 | sequence_SO=chromosome | SO=protein_coding_gene | is_pseudo=false	0	11.371	22	3	24	3	155	17.5	10.76	23.85	3	1.188	0.623	0.25	-0.68	0.910032	0.361252	0.995562	0.888356	13.63	14.61	0.38	0.25	-0.09	-0.82	-0.68	-0.34	1.10582e+06	616798	1.01228e+06	15.61	20.09	11.19	1.39148e+06	1.10582e+06	1.04673e+06	616798	602574	849289	804849	706221	1.01228e+06	1.07774e+06	1.25914e+06	1.34939e+06
FALSE	High	Master Protein	TGGT1_266260-t26_1-p1	transcript=TGGT1_266260-t26_1 | gene=TGGT1_266260 | organism=Toxoplasma_gondii_GT1 | gene_product=hypothetical protein | transcript_product=hypothetical protein | location=TGGT1_chrIX:1086456-1089158(+) | protein_length=293 | sequence_SO=chromosome | SO=protein_coding_gene | is_pseudo=false	0	11.334	8	1	5	1	293	32.7	9.58	9.73	1	3.999	1.257	2	0.33	0.000214453	0.337905	0.00540153	0.875727	16.29	45.18	2.15	2	1.47	-0.19	0.33	1.38	545990	176496	123004	40.18	35.05	23.3	545990	561384	241119	107534	176496	226230	123004	140371	31233.2	103830	73370.9	189951
FALSE	High	Master Protein	TGGT1_270240-t26_1-p1	transcript=TGGT1_270240-t26_1 | gene=TGGT1_270240 | organism=Toxoplasma_gondii_GT1 | gene_product=MAG1 protein [Source:UniProtKB/TrEMBL;Acc:S7V482] | transcript_product=MAG1 protein | location=TGGT1_chrVIII:5310162-5311630(+) | protein_length=452 | sequence_SO=chromosome | SO=protein_coding_gene | is_pseudo=false	0	11.328	9	4	5	4	452	49.2	4.96	7.1	4	1.563	5.157	0.64	2.37	0.355197	2.36406e-06	0.938934	3.6643e-05	31.51	80.02	0.64	1.03	0.3	1.25	2.37	4.19	444763	1.01046e+06	164326	38.42	111.85	17.85	471046	444763	209338	363833	1.01046e+06	4.32425e+06	124819	262864	164326	146270	178536	174106
FALSE	High	Master Protein	TGGT1_223855-t26_1-p1	transcript=TGGT1_223855-t26_1 | gene=TGGT1_223855 | organism=Toxoplasma_gondii_GT1 | gene_product=RRM domain-containing protein [Source:UniProtKB/TrEMBL;Acc:S7WBY7] | transcript_product=RNA recognition motif-containing protein | location=TGGT1_chrX:3429742-3436856(-) | protein_length=565 | sequence_SO=chromosome | SO=protein_coding_gene | is_pseudo=false	0	11.232	8	4	18	4	565	62.7	9.29	10.1	4	0.658	0.432	-0.6	-1.21	0.102244	0.0593116	0.528263	0.373478	9.21	21.5	-0.6	-0.51	-0.99	-0.94	-1.21	-1.4	438219	213924	669813	10.27	12.76	21.1	445931	438219	368104	256022	201544	213924	407511	328145	368378	669813	638336	924709
FALSE	High	Master Protein	TGGT1_310950-t26_1-p1	transcript=TGGT1_310950-t26_1 | gene=TGGT1_310950 | organism=Toxoplasma_gondii_GT1 | gene_product=AP2/ERF domain-containing protein [Source:UniProtKB/TrEMBL;Acc:S7UT71] | transcript_product=AP2 domain transcription factor AP2XI-3 | location=TGGT1_chrXI:1647960-1653648(+) | protein_length=1399 | sequence_SO=chromosome | SO=protein_coding_gene | is_pseudo=false	0	11.195	2	3	22	3	1399	135.2	4.53	21.51	3	0.705	1.072	-0.5	0.1	0.15266	0.594509	0.6476	0.973941	46.98	21.88	-0.5	-0.91	0.05	0.1	0.3	-0.7	725139	749356	855738	9.81	45.69	8.32	725139	622481	752939	801771	749356	291560	747347	729385	561904	855738	962031	821792
FALSE	High	Master Protein	TGGT1_280610-t26_1-p1	transcript=TGGT1_280610-t26_1 | gene=TGGT1_280610 | organism=Toxoplasma_gondii_GT1 | gene_product=SRP54 domain-containing protein [Source:UniProtKB/TrEMBL;Acc:S7UTQ2] | transcript_product=signal recognition particle receptor alpha subunit | location=TGGT1_chrVIIa:237626-244988(+) | protein_length=556 | sequence_SO=chromosome | SO=protein_coding_gene | is_pseudo=false	0	11.192	9	4	15	4	556	60.8	7.49	0	4	1.205	1.015	0.27	0.02	0.877026	0.698177	0.995562	0.973941	20.21	6.55	0.27	0.45	-0.06	-0.34	0.02	0.08	677889	473001	500066	30.06	8.4	4.5	677889	484609	897015	535866	473001	458574	371415	484150	356610	528955	499318	821759
FALSE	High	Master Protein	TGGT1_315570-t26_1-p1	transcript=TGGT1_315570-t26_1 | gene=TGGT1_315570 | organism=Toxoplasma_gondii_GT1 | gene_product=hypothetical protein | transcript_product=hypothetical protein | location=TGGT1_chrXI:4757280-4758139(+) | protein_length=91 | sequence_SO=chromosome | SO=protein_coding_gene | is_pseudo=false	0	11.183	15	1	7	1	91	9.3	11.68	18.06	1	0.57	0.01	-0.81	-6.64	0.0395421	1e-17	0.303986	2.015e-16	7.07	0	-0.81	-1.85	-0.74	-6.64	-6.64	-0.79	113655	79756.4	401844	92.49		108.83	113655	432938	82508.6			79756.4		76102.4	137892	115368	3.72358e+06	1.15479e+06
FALSE	High	Master Protein	TGGT1_228250-t26_1-p1	transcript=TGGT1_228250-t26_1 | gene=TGGT1_228250 | organism=Toxoplasma_gondii_GT1 | gene_product=Tr-type G domain-containing protein [Source:UniProtKB/TrEMBL;Acc:S7UX78] | transcript_product=elongation factor Tu GTP binding domain-containing protein | location=TGGT1_chrX:358605-365361(+) | protein_length=1118 | sequence_SO=chromosome | SO=protein_coding_gene | is_pseudo=false	0	11.15	3	3	7	3	1118	122.3	6.95	7.85	3	0.976	0.853	-0.04	-0.23	0.639717	0.940707	0.971725	0.987776	0.66	14.43	-0.03	-0.53	-0.04	-0.08	-0.23	-0.71	321388	264894	337205	19.78	16.69	7.64	324798	223764	321388	294050	264894	209839	303521	299241	315456	306938	337205	357610
FALSE	High	Master Protein	TGGT1_244100-t26_1-p1	transcript=TGGT1_244100-t26_1 | gene=TGGT1_244100 | organism=Toxoplasma_gondii_GT1 | gene_product=Nop domain-containing protein [Source:UniProtKB/TrEMBL;Acc:S7UEN2] | transcript_product=snoRNA binding domain-containing protein | location=TGGT1_chrVI:2934030-2942235(-) | protein_length=553 | sequence_SO=chromosome | SO=protein_coding_gene | is_pseudo=false	0	11.005	8	4	6	4	553	59.8	6.73	1.67	4	1.148	0.692	0.2	-0.53	0.989679	0.527146	0.998872	0.960964	41.1	19.54	0.76	0.2	-0.27	-1.14	-0.53	-0.33	536561	240753	392707	66.54	13.69	6.99	1.26836e+06	536561	362394	240753	188431	242211	112833	298524	240722	348949	432031	506500
FALSE	High	Master Protein	TGGT1_201680-t26_1-p1	transcript=TGGT1_201680-t26_1 | gene=TGGT1_201680 | organism=Toxoplasma_gondii_GT1 | gene_product=Eukaryotic translation initiation factor 3 subunit A [Source:UniProtKB/TrEMBL;Acc:S7WB14] | transcript_product=putative eukaryotic initiation factor-3 subunit 10 | location=TGGT1_chrVIIa:3754116-3762345(+) | protein_length=1031 | sequence_SO=chromosome | SO=protein_coding_gene | is_pseudo=false	0	10.934	4	4	5	4	1031	118.8	8.73	0	4	1.177	0.728	0.24	-0.46	0.931167	0.617348	0.995562	0.973941	52.37	12.29	0.92	0.24	-0.39	-0.57	-0.46	-0.31	197745	119793	212363	42.33	37.41	12.85	349521	161019	197745	119793	116440	215692	113138	140951	223606	212363	188642	243703
FALSE	High	Master Protein	TGGT1_265090-t26_1-p1	transcript=TGGT1_265090-t26_1 | gene=TGGT1_265090 | organism=Toxoplasma_gondii_GT1 | gene_product=hypothetical protein | transcript_product=hypothetical protein | location=TGGT1_chrIX:1596970-1609746(-) | protein_length=2477 | sequence_SO=chromosome | SO=protein_coding_gene | is_pseudo=false	0	10.932	2	3	9	3	2477	267.7	7.68	4.56	3	1.155	0.808	0.21	-0.31	0.975166	0.824762	0.996177	0.987776	24.75	4.57	0.43	-0.63	0.21	-0.35	0.11	-0.31	241770	82397.5	99208.4	19.13	5.82	46.53	241770	186728	275695	82397.5	89778.4	80497.7	67153.4	81173.5	83132.9	311414	376613	539171
FALSE	High	Master Protein	TGGT1_314810-t26_1-p1	transcript=TGGT1_314810-t26_1 | gene=TGGT1_314810 | organism=Toxoplasma_gondii_GT1 | gene_product=Ribosomal protein RPL7 [Source:UniProtKB/TrEMBL;Acc:A0A125YUF5] | transcript_product=ribosomal protein RPL7 | location=TGGT1_chrXI:4256933-4260657(+) | protein_length=258 | sequence_SO=chromosome | SO=protein_coding_gene | is_pseudo=false	0	10.923	16	4	9	4	258	30.1	10.36	4.71	4	1.398	0.581	0.48	-0.78	0.551851	0.271427	0.956542	0.818481	28.18	2.8	0.73	0.48	-0.4	-0.78	-0.69	-0.81	1.82054e+06	833077	1.34111e+06	18.34	14.8	19.05	2.31335e+06	1.63076e+06	1.82054e+06	833077	720667	969306	1.06302e+06	994282	1.32551e+06	1.34111e+06	1.7442e+06	1.6568e+06
FALSE	High	Master Protein	TGGT1_213310-t26_1-p1	transcript=TGGT1_213310-t26_1 | gene=TGGT1_213310 | organism=Toxoplasma_gondii_GT1 | gene_product=hypothetical protein | transcript_product=hypothetical protein | location=TGGT1_chrV:790347-796988(-) | protein_length=1603 | sequence_SO=chromosome | SO=protein_coding_gene | is_pseudo=false	0	10.899	3	5	8	5	1603	170.1	9.86	5.66	5	1.429	0.282	0.52	-1.83	0.509211	0.00247625	0.951523	0.0266115	20.09	3.49	0.78	0.52	0.31	-2.11	-1.83	-1.79	393181	43631.7	270180	17.57	38.57	2.89	502806	362589	393181	43631.7	66552.1	30777.3	32739.6	35741.8	101343	370239	349662	413004
FALSE	High	Master Protein	TGGT1_261030-t26_1-p1	transcript=TGGT1_261030-t26_1 | gene=TGGT1_261030 | organism=Toxoplasma_gondii_GT1 | gene_product=Pyr_redox_2 domain-containing protein [Source:UniProtKB/TrEMBL;Acc:S7UYG7] | transcript_product=pyridine nucleotide-disulfide oxidoreductase domain-containing protein | location=TGGT1_chrVIIb:1882747-1890994(+) | protein_length=859 | sequence_SO=chromosome | SO=protein_coding_gene | is_pseudo=false	0	10.851	4	4	21	4	859	93.7	9.54	11.12	4	1.19	0.9	0.25	-0.15	0.906467	0.947514	0.995562	0.987776	23.08	29.37	0.25	0.46	0.01	-0.15	0.17	-0.85	1.09866e+06	5.60457e+06	1.03983e+06	7.04	69.35	12.46	1.20163e+06	1.04745e+06	1.09866e+06	8.5288e+06	1.39049e+06	5.60457e+06	1.25211e+06	922594	1.18344e+06	984893	1.48811e+06	1.57847e+06
FALSE	High	Master Protein	TGGT1_219150-t26_1-p1	transcript=TGGT1_219150-t26_1 | gene=TGGT1_219150 | organism=Toxoplasma_gondii_GT1 | gene_product=ZZ-type domain-containing protein [Source:UniProtKB/TrEMBL;Acc:S7WAE6] | transcript_product=zinc finger, zz type domain-containing protein | location=TGGT1_chrXII:1042433-1047423(-) | protein_length=843 | sequence_SO=chromosome | SO=protein_coding_gene | is_pseudo=false	0	10.732	6	3	3	3	843	96	5.34	2.87	3	0.575	0.369	-0.8	-1.44	0.041965	0.0209021	0.31611	0.167511	23.16	18.97	-1.16	-0.8	-0.55	-1.24	-2.71	-1.44	81474.4	26896.1	134869	16.71	60.16	30.01	60424.2	81474.4	82650.4	57045.7	26896.1	18037.8	69250.2	47194.7	78931.7	134869	210071	292867
FALSE	High	Master Protein	TGGT1_211680-t26_1-p1	transcript=TGGT1_211680-t26_1 | gene=TGGT1_211680 | organism=Toxoplasma_gondii_GT1 | gene_product=Protein disulfide-isomerase [Source:UniProtKB/TrEMBL;Acc:A0A125YQI9] | transcript_product=protein disulfide isomerase | location=TGGT1_chrIV:1556190-1558014(+) | protein_length=471 | sequence_SO=chromosome | SO=protein_coding_gene | is_pseudo=false	0	10.699	7	3	3	3	471	52.8	5.22	2.1	3	0.91	1.267	-0.14	0.34	0.500056	0.327519	0.951523	0.875727	8.98	17.52	-0.14	-0.05	-0.23	0.34	0.16	0.66	80533.5	41637.1	73526.7	10.07	24.63	15.7	77370.9	93295.7	80533.5	41025.7	41637.1	61877.6	33134.3	57332.7	298964	73526.7	73050.1	78176.8
FALSE	High	Master Protein	TGGT1_207710-t26_1-p1	transcript=TGGT1_207710-t26_1 | gene=TGGT1_207710 | organism=Toxoplasma_gondii_GT1 | gene_product=CDP-diacylglycerol--inositol 3-phosphatidyltransferase [Source:UniProtKB/TrEMBL;Acc:A0A125YYB1] | transcript_product=putative phosphatidylinositol synthase | location=TGGT1_chrIb:239752-244462(+) | protein_length=258 | sequence_SO=chromosome | SO=protein_coding_gene | is_pseudo=false	0	10.697	6	1	4	1	258	27.8	8.07	9.43	1	0.529	0.958	-0.92	-0.06	0.022832	0.816167	0.211524	0.987776	12.63	11.93	0.18	-1.04	-0.92	-0.06	0.06	-0.92	154579	212267	244677	38.81	24.3	14.19	250451	119356	154579	212267	254797	154487	167091	252971	199631	221674	244677	292008
FALSE	High	Master Protein	TGGT1_207760-t26_1-p1	transcript=TGGT1_207760-t26_1 | gene=TGGT1_207760 | organism=Toxoplasma_gondii_GT1 | gene_product=DnaJ C terminal region domain-containing protein [Source:UniProtKB/TrEMBL;Acc:S7VY71] | transcript_product=DnaJ C terminal region domain-containing protein | location=TGGT1_chrIb:282631-291796(+) | protein_length=1519 | sequence_SO=chromosome | SO=protein_coding_gene | is_pseudo=false	0	10.632	3	4	20	4	1519	161.5	10.07	13.04	4	1.069	0.933	0.1	-0.1	0.84184	0.8698	0.995562	0.987776	9.58	6.26	0.1	-0.05	0.19	-0.1	-0.01	-0.16	692899	619244	608910	20.42	13	7.94	959666	692899	677645	663406	619244	512186	550588	608910	504153	527462	684462	756428
FALSE	High	Master Protein	TGGT1_269190-t26_1-p1	transcript=TGGT1_269190-t26_1 | gene=TGGT1_269190 | organism=Toxoplasma_gondii_GT1 | gene_product=Gp_dh_N domain-containing protein [Source:UniProtKB/TrEMBL;Acc:S7WDK9] | transcript_product=glyceraldehyde-3-phosphate dehydrogenase GAPDH2 | location=TGGT1_chrVIII:6001367-6005276(-) | protein_length=995 | sequence_SO=chromosome | SO=protein_coding_gene | is_pseudo=false	0	10.54	4	3	4	3	995	105.1	5.05	2.25	3	1.319	1.006	0.4	0.01	0.6732	0.715524	0.971725	0.973941	20.28	10.48	0.87	0.4	0.19	-0.1	0.01	0.16	322333	181984	229227	11.53	30.92	6.08	322333	325393	263288	181984	237212	125020	150818	242930	215097	229227	270037	323382
FALSE	High	Master Protein	TGGT1_288720-t26_1-p1	transcript=TGGT1_288720-t26_1 | gene=TGGT1_288720 | organism=Toxoplasma_gondii_GT1 | gene_product=Ribosomal_L16 domain-containing protein [Source:UniProtKB/TrEMBL;Acc:A0A125YSQ3] | transcript_product=ribosomal protein RPL10 | location=TGGT1_chrIX:2518172-2520490(-) | protein_length=221 | sequence_SO=chromosome | SO=protein_coding_gene | is_pseudo=false	0	10.493	23	3	20	3	221	24.8	10.18	14.87	3	1.431	0.755	0.52	-0.41	0.506925	0.687689	0.951523	0.973941	19.85	10.29	0.71	0.52	0.31	-0.87	-0.3	-0.41	3.41581e+06	1.60745e+06	2.35555e+06	19.33	24.06	12.77	3.41773e+06	2.38774e+06	3.41581e+06	1.60745e+06	1.80243e+06	1.10154e+06	1.17432e+06	1.61664e+06	1.44637e+06	2.16012e+06	2.35555e+06	2.98623e+06
FALSE	High	Master Protein	TGGT1_273760-t26_1-p1	transcript=TGGT1_273760-t26_1 | gene=TGGT1_273760 | organism=Toxoplasma_gondii_GT1 | gene_product=Heat shock protein HSP70 [Source:UniProtKB/TrEMBL;Acc:A0A125YP12] | transcript_product=heat shock protein HSP70 | location=TGGT1_chrVIII:3285695-3287698(-) | protein_length=667 | sequence_SO=chromosome | SO=protein_coding_gene | is_pseudo=false	0	10.49	6	4	7	4	667	72.2	5.2	5.87	4	1.537	1.014	0.62	0.02	0.381404	0.699844	0.949873	0.973941	33.39	23.85	0.62	0.91	0.23	0.02	0.24	-0.85	740045	686050	802396	28.33	15.12	28.54	740045	647203	1.0909e+06	686050	819938	609351	426841	725345	1.15584e+06	672287	802396	907391
FALSE	High	Master Protein	TGGT1_258740-t26_1-p1	transcript=TGGT1_258740-t26_1 | gene=TGGT1_258740 | organism=Toxoplasma_gondii_GT1 | gene_product=Ig-like domain-containing protein [Source:UniProtKB/TrEMBL;Acc:S7UYS4] | transcript_product=putative eukaryotic initiation factor-2A | location=TGGT1_chrVIIb:3176493-3182737(-) | protein_length=594 | sequence_SO=chromosome | SO=protein_coding_gene | is_pseudo=false	0	10.457	5	2	5	2	594	64.6	8.6	2.2	2	1.37	1.187	0.45	0.25	0.59318	0.421233	0.971725	0.920068	19.59	28.83	0.63	0.45	0.14	0.25	0.5	-0.35	266893	243951	198600	31.25	14.62	19.3	299914	156144	266893	253105	243951	190989	173878	179031	192364	198600	213040	257532
FALSE	High	Master Protein	TGGT1_224720-t26_1-p1	transcript=TGGT1_224720-t26_1 | gene=TGGT1_224720 | organism=Toxoplasma_gondii_GT1 | gene_product=RRM domain-containing protein [Source:UniProtKB/TrEMBL;Acc:S7WCB9] | transcript_product=SPOC domain-containing protein | location=TGGT1_chrX:2763216-2767432(-) | protein_length=704 | sequence_SO=chromosome | SO=protein_coding_gene | is_pseudo=false	0	10.426	6	3	7	3	704	73.4	9.66	2.33	3	1.67	0.273	0.74	-1.87	0.26277	0.00183774	0.851439	0.0211603	65.74	1.1	2.19	0.74	-0.11	-1.87	-1.1	-1.89	850819	110132	308757	64.07	48.46	5.06	1.28491e+06	850819	263763	82610.4	205108	110132	104976	308757	94333	284145	366087	484379
FALSE	High	Master Protein	TGGT1_238010-t26_1-p1	transcript=TGGT1_238010-t26_1 | gene=TGGT1_238010 | organism=Toxoplasma_gondii_GT1 | gene_product=Ribosomal_L23eN domain-containing protein [Source:UniProtKB/TrEMBL;Acc:S7W653] | transcript_product=ribosomal protein RPL23A | location=TGGT1_chrVI:8631-10722(+) | protein_length=167 | sequence_SO=chromosome | SO=protein_coding_gene | is_pseudo=false	0	10.413	18	3	20	3	167	18.6	10.4	16.33	3	1.138	0.569	0.19	-0.81	0.988339	0.247823	0.998872	0.800552	9.12	0.21	0.27	0.19	-0.34	-0.81	-0.94	-0.81	1.85324e+06	835661	1.67769e+06	18.51	22.44	14.95	2.33996e+06	1.85324e+06	1.63756e+06	810290	835661	1.18965e+06	923048	1.01118e+06	1.49632e+06	1.67769e+06	1.67244e+06	2.14962e+06
FALSE	High	Master Protein	TGGT1_275330-t26_1-p1	transcript=TGGT1_275330-t26_1 | gene=TGGT1_275330 | organism=Toxoplasma_gondii_GT1 | gene_product=Ribosomal protein RPL29 [Source:UniProtKB/TrEMBL;Acc:S7UPT4] | transcript_product=ribosomal protein RPL29 | location=TGGT1_chrX:7071284-7074489(-) | protein_length=877 | sequence_SO=chromosome | SO=protein_coding_gene | is_pseudo=false	0	10.4	5	3	17	3	877	95.5	10.08	16.46	3	0.938	0.811	-0.09	-0.3	0.559421	0.833074	0.964665	0.987776	6.05	6.61	-0.03	-0.69	-0.09	-0.37	-0.3	-0.07	532418	631297	640700	23.47	9.51	22.44	734604	475201	532418	579871	631297	700650	975346	890949	836190	640700	557159	595638
FALSE	High	Master Protein	TGGT1_209910-t26_1-p1	transcript=TGGT1_209910-t26_1 | gene=TGGT1_209910 | organism=Toxoplasma_gondii_GT1 | gene_product=Histone H2B [Source:UniProtKB/TrEMBL;Acc:A0A125YMF4] | transcript_product=histone H2Bv | location=TGGT1_chrIb:1562803-1563174(+) | protein_length=123 | sequence_SO=chromosome | SO=protein_coding_gene | is_pseudo=false	0	10.394	28	3	29	3	123	13.7	10.55	54.82	3	0.905	0.662	-0.14	-0.6	0.490334	0.45189	0.951523	0.924827	0.67	5.43	0.45	-0.15	-0.14	-0.53	-0.65	-0.6	6.86569e+06	3.8009e+06	6.95909e+06	39.37	19.93	23.31	1.25656e+07	6.49684e+06	6.86569e+06	3.59556e+06	3.8009e+06	5.12811e+06	3.8613e+06	3.76029e+06	5.40085e+06	6.02952e+06	9.00688e+06	9.39684e+06
FALSE	High	Master Protein	TGGT1_281900-t26_1-p1	transcript=TGGT1_281900-t26_1 | gene=TGGT1_281900 | organism=Toxoplasma_gondii_GT1 | gene_product=SET domain containing lysine methyltransferase KMTox [Source:UniProtKB/TrEMBL;Acc:S7UVD5] | transcript_product=SET domain containing lysine methyltransferase KMTox | location=TGGT1_chrVIIa:4163235-4167746(-) | protein_length=880 | sequence_SO=chromosome | SO=protein_coding_gene | is_pseudo=false	0	10.337	5	4	8	4	880	95.8	8.41	5.79	4	2.048	0.72	1.03	-0.47	0.085005	0.598347	0.469274	0.973941	4.95	41.4	0.67	1.08	1.03	-1.11	-0.47	0	683449	182808	270464	12.31	47.72	22.53	683449	657173	822365	182808	166849	373634	265934	206559	388418	456592	270464	480323
FALSE	High	Master Protein	TGGT1_300190-t26_1-p1	transcript=TGGT1_300190-t26_1 | gene=TGGT1_300190 | organism=Toxoplasma_gondii_GT1 | gene_product=Ribosomal protein RPL37A [Source:UniProtKB/TrEMBL;Acc:A0A125YTT2] | transcript_product=ribosomal protein RPL37A | location=TGGT1_chrXII:125333-127624(+) | protein_length=96 | sequence_SO=chromosome | SO=protein_coding_gene | is_pseudo=false	0	10.239	35	3	21	3	96	10.4	10.76	10.64	3	1.117	0.869	0.16	-0.2	0.945512	0.977972	0.995562	0.987776	10.61	21.15	0.05	0.35	0.16	-0.2	-0.4	0.45	460980	372922	387490	12.41	38.96	15.55	393543	460980	505199	372922	266246	577108	465727	291358	499639	345730	526270	476566
FALSE	High	Master Protein	TGGT1_266400-t26_1-p1	transcript=TGGT1_266400-t26_1 | gene=TGGT1_266400 | organism=Toxoplasma_gondii_GT1 | gene_product=hypothetical protein | transcript_product=hypothetical protein | location=TGGT1_chrIX:987434-999664(+) | protein_length=960 | sequence_SO=chromosome | SO=protein_coding_gene | is_pseudo=false	0	10.103	5	4	11	4	960	104.7	8.62	5.43	4	1.034	0.85	0.05	-0.23	0.765818	0.932249	0.995562	0.987776	7.65	12.82	0.12	0.05	-0.13	-0.54	-0.23	-0.1	281965	214645	274027	19.07	9.14	23.65	356262	281965	246045	187114	223686	214645	207968	218349	203501	271087	274027	475280
FALSE	High	Master Protein	TGGT1_311830-t26_1-p1	transcript=TGGT1_311830-t26_1 | gene=TGGT1_311830 | organism=Toxoplasma_gondii_GT1 | gene_product=hypothetical protein | transcript_product=hypothetical protein | location=TGGT1_chrXI:2276009-2277160(+) | protein_length=145 | sequence_SO=chromosome | SO=protein_coding_gene | is_pseudo=false	0	10.066	8	1	6	1	145	16.3	9.73	9.11	1	1.3	0.638	0.38	-0.65	0.705087	0.394722	0.971725	0.906667	9.36	7.45	0.38	0.47	0.17	-0.72	0	-0.65	425450	240369	354048	11.48	10.27	17.91	460092	365437	425450	214957	264216	240369	354048	326346	477160	319313	264508	376961
FALSE	High	Master Protein	TGGT1_271740-t26_1-p1	transcript=TGGT1_271740-t26_1 | gene=TGGT1_271740 | organism=Toxoplasma_gondii_GT1 | gene_product=hypothetical protein | transcript_product=hypothetical protein | location=TGGT1_chrVIII:4419752-4431388(+) | protein_length=1992 | sequence_SO=chromosome | SO=protein_coding_gene | is_pseudo=false	0	10.051	1	1	1	1	1992	216	7.88	3.63	1	1.575	0.994	0.65	-0.01	0.34413	0.739817	0.938934	0.976829	89.63	15.3	1.94	0.65	-0.68	-0.01	0.15	-0.44	57180.9	36943.8	36314.5	72.32	7.31	20.86	134698	57180.9	31311.3	34831.7	40250.9	36943.8	28008.4	36314.5	38492.4	35040.6	51707.7	50284.8
FALSE	High	Master Protein	TGGT1_271050-t26_1-p1	transcript=TGGT1_271050-t26_1 | gene=TGGT1_271050 | organism=Toxoplasma_gondii_GT1 | gene_product=SAG domain-containing protein [Source:UniProtKB/TrEMBL;Acc:A0A125YVU5] | transcript_product=SAG-related sequence SRS34A | location=TGGT1_chrVIII:4754604-4755164(+) | protein_length=186 | sequence_SO=chromosome | SO=protein_coding_gene | is_pseudo=false	0	10.048	13	2	20	2	186	19	7.97	19.95	2	0.926	0.996	-0.11	-0.01	0.533839	0.735574	0.953376	0.976829	26.16	1.7	0.17	-0.11	-0.54	-0.02	-0.01	0.43	1.64527e+06	2.05254e+06	2.2153e+06	12.22	24.56	26.63	1.5407e+06	1.94343e+06	1.64527e+06	1.81713e+06	2.05254e+06	2.86812e+06	2.11984e+06	2.2153e+06	3.32498e+06	1.08731e+06	2.01909e+06	1.27735e+06
FALSE	High	Master Protein	TGGT1_214270-t26_1-p1	transcript=TGGT1_214270-t26_1 | gene=TGGT1_214270 | organism=Toxoplasma_gondii_GT1 | gene_product=Tr-type G domain-containing protein [Source:UniProtKB/TrEMBL;Acc:S7UR99] | transcript_product=putative translation initiation factor IF-2 | location=TGGT1_chrX:6085732-6096115(-) | protein_length=1146 | sequence_SO=chromosome | SO=protein_coding_gene | is_pseudo=false	0	10.044	5	4	4	4	1146	126.2	6.35	1.65	4	1.97	0.728	0.98	-0.46	0.107725	0.619769	0.545705	0.973941	2.78	5.33	1.01	0.98	0.4	-0.95	-0.46	-0.4	474509	151451	225674	40.51	29.76	41.14	857227	423588	474509	107770	198572	151451	220195	197301	139637	407123	482639	650534
FALSE	High	Master Protein	TGGT1_255220-t26_1-p1	transcript=TGGT1_255220-t26_1 | gene=TGGT1_255220 | organism=Toxoplasma_gondii_GT1 | gene_product=AP2 domain transcription factor AP2VIIb-3 [Source:UniProtKB/TrEMBL;Acc:S7WAT4] | transcript_product=AP2 domain transcription factor AP2VIIb-3 | location=TGGT1_chrVIIb:4894610-4902012(-) | protein_length=2287 | sequence_SO=chromosome | SO=protein_coding_gene | is_pseudo=false	0	9.948	2	3	7	3	2287	237.4	5.31	8.15	3	0.842	0.896	-0.25	-0.16	0.365878	0.955209	0.938934	0.987776	24.62	17.79	0.51	-0.25	-0.47	0.03	-0.16	-1.28	196928	173663	198020	51	23.95	22.31	412418	170769	196928	173663	180117	112633	150086	167038	150094	170163	198020	261524
FALSE	High	Master Protein	TGGT1_310760-t26_1-p1	transcript=TGGT1_310760-t26_1 | gene=TGGT1_310760 | organism=Toxoplasma_gondii_GT1 | gene_product=PPM-type phosphatase domain-containing protein [Source:UniProtKB/TrEMBL;Acc:S7W916] | transcript_product=protein phosphatase 2C domain-containing protein | location=TGGT1_chrXI:1539107-1545094(+) | protein_length=344 | sequence_SO=chromosome | SO=protein_coding_gene | is_pseudo=false	0	9.92	10	3	5	3	344	37.6	7.12	3.96	3	0.958	0.553	-0.06	-0.86	0.600561	0.218005	0.971725	0.763966	18.3	1.15	0.31	-0.06	-0.23	-0.86	-0.87	-0.71	476236	143044	398989	20.46	24.69	30.05	488176	329693	476236	143044	124600	198288	183604	145759	178307	398989	360708	664474
FALSE	High	Master Protein	TGGT1_311290-t26_1-p1	transcript=TGGT1_311290-t26_1 | gene=TGGT1_311290 | organism=Toxoplasma_gondii_GT1 | gene_product=Protein tyrosine phosphatase family protein, ptpla protein [Source:UniProtKB/TrEMBL;Acc:A0A125YHT1] | transcript_product=protein tyrosine phosphatase family protein, ptpla protein | location=TGGT1_chrXI:1911350-1913933(-) | protein_length=274 | sequence_SO=chromosome | SO=protein_coding_gene | is_pse…	0	9.847	8	2	8	2	274	30.5	8.85	5.43	2	0.968	1.219	-0.05	0.29	0.622508	0.381115	0.971725	0.892961	14.2	6.79	-0.05	-0.18	0.81	0.35	0.29	-0.55	298027	287069	233515	37.37	24.83	18.59	298027	207520	441486	346050	287069	207414	271534	233515	221219	331034	289817	475913
FALSE	High	Master Protein	TGGT1_260440-t26_1-p1	transcript=TGGT1_260440-t26_1 | gene=TGGT1_260440 | organism=Toxoplasma_gondii_GT1 | gene_product=NPL domain-containing protein [Source:UniProtKB/TrEMBL;Acc:S7UYY1] | transcript_product=nuclear factor NF3 | location=TGGT1_chrVIIb:2242975-2247472(-) | protein_length=312 | sequence_SO=chromosome | SO=protein_coding_gene | is_pseudo=false	0	9.82	9	3	26	3	312	34.1	4.31	33.8	3	0.696	0.637	-0.52	-0.65	0.141983	0.393497	0.628783	0.906667	2.82	2.53	0.37	-0.52	-0.55	-0.67	-0.65	-0.35	2.18793e+06	1.4237e+06	3.08385e+06	37.24	27.91	21.29	3.74082e+06	2.18793e+06	1.93867e+06	1.21782e+06	1.4237e+06	2.05659e+06	1.52943e+06	2.02829e+06	2.38269e+06	2.18881e+06	3.08385e+06	3.36076e+06
FALSE	High	Master Protein	TGGT1_232350-t26_1-p1	transcript=TGGT1_232350-t26_1 | gene=TGGT1_232350 | organism=Toxoplasma_gondii_GT1 | gene_product=Lactate dehydrogenase LDH1 [Source:UniProtKB/TrEMBL;Acc:A0A125YWC8] | transcript_product=lactate dehydrogenase LDH1 | location=TGGT1_chrVIII:2023599-2025126(+) | protein_length=329 | sequence_SO=chromosome | SO=protein_coding_gene | is_pseudo=false	0	9.797	11	2	2	2	329	35.5	6.38	3.33	2	0.971	0.89	-0.04	-0.17	0.629987	0.970931	0.971725	0.987776	108.02	13.67	1.84	-0.04	-6.64	-0.3	-0.17	0.34	90033.9	50229.6	39574.5	6.35	64.14	71.74	86077.7	94171.9		19589.9	86246.4	50229.6	18383.4	177403	321510	24049.3		39574.5
FALSE	High	Master Protein	TGGT1_315220-t26_1-p1	transcript=TGGT1_315220-t26_1 | gene=TGGT1_315220 | organism=Toxoplasma_gondii_GT1 | gene_product=Rhoptry protein ROP14 [Source:UniProtKB/TrEMBL;Acc:S7UMJ4] | transcript_product=rhoptry protein ROP14 | location=TGGT1_chrXI:4529966-4537996(+) | protein_length=1061 | sequence_SO=chromosome | SO=protein_coding_gene | is_pseudo=false	0	9.786	5	4	9	4	1061	121.8	8.81	1.85	4	1.037	0.709	0.05	-0.5	0.773332	0.568717	0.995562	0.962677	46.02	71.54	0.55	0.05	-0.48	-0.5	0.45	-1.79	589511	451272	651882	29.31	37.77	41.8	848848	483873	589511	451272	560958	248213	269384	352574	181444	651882	860425	1.04199e+06
FALSE	High	Master Protein	TGGT1_314260-t26_1-p1	transcript=TGGT1_314260-t26_1 | gene=TGGT1_314260 | organism=Toxoplasma_gondii_GT1 | gene_product=hypothetical protein | transcript_product=hypothetical protein | location=TGGT1_chrXI:3928370-3929011(+) | protein_length=213 | sequence_SO=chromosome | SO=protein_coding_gene | is_pseudo=false	0	9.781	18	2	7	2	213	23.8	10.01	5.43	2	1.819	0.89	0.86	-0.17	0.170109	0.970886	0.685538	0.987776	28.33	14.95	1.12	0.86	0.33	-0.73	-0.02	-0.17	739573	333481	408646	15.67	25.37	15.36	920319	739573	686466	220989	371625	333481	305161	302819	369889	446748	799206	605372
FALSE	High	Master Protein	TGGT1_237840-t26_1-p1	transcript=TGGT1_237840-t26_1 | gene=TGGT1_237840 | organism=Toxoplasma_gondii_GT1 | gene_product=hypothetical protein | transcript_product=hypothetical protein | location=TGGT1_chrIV:2433951-2437816(+) | protein_length=1083 | sequence_SO=chromosome | SO=protein_coding_gene | is_pseudo=false	0	9.754	4	3	16	3	1083	118.5	8.6	5.59	3	1.823	0.797	0.87	-0.33	0.167933	0.796801	0.68017	0.987776	2.86	4.78	1.38	0.87	0.84	-0.37	-0.33	0.74	459237	239312	250849	14.21	79.26	5.88	442394	570756	459237	239312	41618.4	401767	273869	246958	245425	305356	316410	447813
FALSE	High	Master Protein	TGGT1_313010-t26_1-p1	transcript=TGGT1_313010-t26_1 | gene=TGGT1_313010 | organism=Toxoplasma_gondii_GT1 | gene_product=DEAD (Asp-Glu-Ala-Asp) box polypeptide DDX6 [Source:UniProtKB/TrEMBL;Acc:S7W8B2] | transcript_product=DEAD (Asp-Glu-Ala-Asp) box polypeptide DDX6 | location=TGGT1_chrXI:2995385-2998767(-) | protein_length=475 | sequence_SO=chromosome | SO=protein_coding_gene | is_pseudo=false	0	9.732	5	2	5	2	475	53.4	8.44	5.03	2	1.32	0.908	0.4	-0.14	0.6714	0.928284	0.971725	0.987776	10.88	16.52	0.4	0.5	0.06	0.03	-0.4	-0.14	167310	232083	151548	39.77	6.12	19.17	167310	142032	290709	232083	245728	217393	217872	338919	207282	134185	151548	186240
FALSE	High	Master Protein	TGGT1_285850-t26_1-p1	transcript=TGGT1_285850-t26_1 | gene=TGGT1_285850 | organism=Toxoplasma_gondii_GT1 | gene_product=Peptidylprolyl isomerase [Source:UniProtKB/TrEMBL;Acc:S7W319] | transcript_product=peptidyl-prolyl cis-trans isomerase, FKBP-type domain-containing protein | location=TGGT1_chrV:2026917-2028990(-) | protein_length=428 | sequence_SO=chromosome | SO=protein_coding_gene | is_pseudo=false	0	9.716	11	3	13	3	428	46	8.72	7.5	3	0.862	0.865	-0.21	-0.21	0.402919	0.970185	0.949873	0.987776	20.53	11.61	0	-0.87	-0.21	-0.21	-0.69	-0.09	387874	473611	562335	17.82	14.08	6.63	488606	347425	387874	495528	376828	473611	514887	429870	528642	466559	587313	562335
FALSE	High	Master Protein	TGGT1_262490-t26_1-p1	transcript=TGGT1_262490-t26_1 | gene=TGGT1_262490 | organism=Toxoplasma_gondii_GT1 | gene_product=AB hydrolase-1 domain-containing protein [Source:UniProtKB/TrEMBL;Acc:S7UYC4] | transcript_product=putative alpha/beta hydrolase | location=TGGT1_chrVIIb:1184618-1187285(-) | protein_length=260 | sequence_SO=chromosome | SO=protein_coding_gene | is_pseudo=false	0	9.709	10	2	6	2	260	29.1	8.65	12.04	2	2.161	1.309	1.11	0.39	0.0599409	0.28648	0.385065	0.833295	9.23	33.4	1.2	1.11	0.64	0.39	0.02	1.13	528157	327565	292487	16.88	44.69	13.58	528157	635233	454157	327565	298010	637690	313877	294104	494230	229322	336277	292487
FALSE	High	Master Protein	TGGT1_267400-t26_1-p1	transcript=TGGT1_267400-t26_1 | gene=TGGT1_267400 | organism=Toxoplasma_gondii_GT1 | gene_product=Ribosomal protein RPL32 [Source:UniProtKB/TrEMBL;Acc:A0A125YTP3] | transcript_product=ribosomal protein RPL32 | location=TGGT1_chrIX:508439-508944(-) | protein_length=134 | sequence_SO=chromosome | SO=protein_coding_gene | is_pseudo=false	0	9.637	14	2	14	2	134	15.6	11.03	25.26	2	1.248	0.674	0.32	-0.57	0.796615	0.481715	0.995562	0.932651	25.24	23.77	0.77	0.32	0.05	-1.17	-0.57	-0.32	1.25074e+06	565921	1.07399e+06	31.01	41	16.91	1.81482e+06	994483	1.25074e+06	471989	565921	992713	622283	658839	971241	1.07399e+06	1.14036e+06	1.52039e+06
FALSE	High	Master Protein	TGGT1_259040-t26_1-p1	transcript=TGGT1_259040-t26_1 | gene=TGGT1_259040 | organism=Toxoplasma_gondii_GT1 | gene_product=hypothetical protein | transcript_product=hypothetical protein | location=TGGT1_chrVIIb:2955779-2958418(+) | protein_length=261 | sequence_SO=chromosome | SO=protein_coding_gene | is_pseudo=false	0	9.623	12	3	4	3	261	28.7	10.58	6.07	3	0.49	0.01	-1.03	-6.64	0.012238	1e-17	0.136997	2.015e-16	6.43	0	0.43	-1.09	-1.03	-6.64	-6.64	-6.64	137980		447968	33.19		67.74	216613	117680	137980						15008.8	181128	283314	799296
FALSE	High	Master Protein	TGGT1_311480-t26_1-p1	transcript=TGGT1_311480-t26_1 | gene=TGGT1_311480 | organism=Toxoplasma_gondii_GT1 | gene_product=hypothetical protein | transcript_product=hypothetical protein | location=TGGT1_chrXI:2071805-2077652(-) | protein_length=386 | sequence_SO=chromosome | SO=protein_coding_gene | is_pseudo=false	0	9.582	15	3	6	3	386	42.4	5.02	0	3	1.104	0.98	0.14	-0.03	0.91665	0.769473	0.995562	0.978242	2.26	10.17	0.14	0.12	0.72	0.07	-0.03	-0.19	227806	149545	182237	26.84	28.41	15.33	182754	227806	309874	191387	149545	106627	160244	136659	168968	224902	304162	363985
FALSE	High	Master Protein	TGGT1_286790-t26_1-p1	transcript=TGGT1_286790-t26_1 | gene=TGGT1_286790 | organism=Toxoplasma_gondii_GT1 | gene_product=Pinin_SDK_memA domain-containing protein [Source:UniProtKB/TrEMBL;Acc:A0A125YP28] | transcript_product=nuclear factor NF2 | location=TGGT1_chrV:1521521-1525782(+) | protein_length=313 | sequence_SO=chromosome | SO=protein_coding_gene | is_pseudo=false	0	9.559	16	4	5	4	313	36	6.24	1.84	4	0.963	0.444	-0.05	-1.17	0.611748	0.0695664	0.971725	0.397663	3.31	52.17	-0.05	-0.02	-0.72	-1.61	0.03	-1.17	343033	137651	533303	31.57	38.76	29.93	549187	316899	343033	137651	241272	122197	177900	230853	133413	533303	464504	636607
FALSE	High	Master Protein	TGGT1_263730-t26_1-p1	transcript=TGGT1_263730-t26_1 | gene=TGGT1_263730 | organism=Toxoplasma_gondii_GT1 | gene_product=Glycerol-3-phosphate dehydrogenase [Source:UniProtKB/TrEMBL;Acc:A0A125YIL0] | transcript_product=FAD-dependent glycerol-3-phosphate dehydrogenase | location=TGGT1_chrVIIb:330001-337948(-) | protein_length=653 | sequence_SO=chromosome | SO=protein_coding_gene | is_pseudo=false	0	9.558	5	2	7	2	653	71.5	6.96	2.24	2	1.434	1.432	0.52	0.52	0.50312	0.191939	0.951523	0.706407	2.94	4.68	0.55	0.52	0.4	0.56	0.52	-0.1	270327	227325	189957	39.53	20.8	12.96	121467	278060	270327	227325	266274	174074	159838	290459	207419	125844	189957	273190
FALSE	High	Master Protein	TGGT1_251950-t26_1-p1	transcript=TGGT1_251950-t26_1 | gene=TGGT1_251950 | organism=Toxoplasma_gondii_GT1 | gene_product=Ribosomal_L12 domain-containing protein [Source:UniProtKB/TrEMBL;Acc:S7V029] | transcript_product=ribosomal protein l7/l12 c-terminal domain-containing protein | location=TGGT1_chrXII:5601980-5605121(+) | protein_length=354 | sequence_SO=chromosome | SO=protein_coding_gene | is_pseudo=false	0	9.511	7	2	3	2	354	36.7	8.92	4.73	2	0.787	1.27	-0.35	0.34	0.26895	0.324596	0.860214	0.875727	21.52	29.59	0.07	-0.35	-0.54	0.34	0.61	0.01	218402	326047	257752	16.49	13.9	6.45	270956	218402	197689	326047	384134	292318	224900	351203	370981	257752	276249	242902
FALSE	High	Master Protein	TGGT1_245680-t26_1-p1	transcript=TGGT1_245680-t26_1 | gene=TGGT1_245680 | organism=Toxoplasma_gondii_GT1 | gene_product=Ribosomal protein RPL21 [Source:UniProtKB/TrEMBL;Acc:S7WHD1] | transcript_product=ribosomal protein RPL21 | location=TGGT1_chrXII:2403148-2403621(+) | protein_length=157 | sequence_SO=chromosome | SO=protein_coding_gene | is_pseudo=false	0	9.473	16	3	23	3	157	17.9	10.35	32.9	3	1.323	0.696	0.4	-0.52	0.666132	0.535579	0.971725	0.960964	40.07	0.91	0.75	0.4	-0.41	-0.51	-0.6	-0.52	1.37377e+06	836734	1.40346e+06	31.16	23.42	21.71	2.22155e+06	1.37377e+06	1.30867e+06	836734	818270	1.2153e+06	982829	1.01088e+06	1.61873e+06	1.40346e+06	1.42071e+06	1.96099e+06
FALSE	High	Master Protein	TGGT1_269010-t26_1-p1	transcript=TGGT1_269010-t26_1 | gene=TGGT1_269010 | organism=Toxoplasma_gondii_GT1 | gene_product=AP2 domain transcription factor AP2VIII-7 [Source:UniProtKB/TrEMBL;Acc:S7WDI4] | transcript_product=AP2 domain transcription factor AP2VIII-7 | location=TGGT1_chrVIII:6138950-6142226(+) | protein_length=870 | sequence_SO=chromosome | SO=protein_coding_gene | is_pseudo=false	0	9.468	5	4	15	4	870	89.3	7.75	0	4	0.796	0.831	-0.33	-0.27	0.284705	0.885197	0.885993	0.987776	8.37	4.89	-0.25	-0.33	-0.89	-0.27	-0.22	-0.4	257194	287248	330092	9.81	23.45	4.37	298391	249431	257194	187284	295281	287248	90810.9	302251	122863	315523	330092	344370
FALSE	High	Master Protein	TGGT1_294690-t26_1-p1	transcript=TGGT1_294690-t26_1 | gene=TGGT1_294690 | organism=Toxoplasma_gondii_GT1 | gene_product=RHOMBOID-like protein [Source:UniProtKB/TrEMBL;Acc:A0A125YG68] | transcript_product=rhomboid protease ROM5 | location=TGGT1_chrIa:1047083-1055149(+) | protein_length=841 | sequence_SO=chromosome | SO=protein_coding_gene | is_pseudo=false	0	9.414	4	2	3	2	841	92	9.69	4.43	2	1.942	1.036	0.96	0.05	0.117331	0.65856	0.568009	0.973941	24.65	58.44	2.13	0.96	0.7	0.05	0.53	-1.63	185878	49780.3	78294.9	28.08	58.91	18.18	210048	117419	185878	49780.3	85780.7	23549.1	43377.5	51707.8	24320.3	140458	141256	150922
FALSE	High	Master Protein	TGGT1_214950-t26_1-p1	transcript=TGGT1_214950-t26_1 | gene=TGGT1_214950 | organism=Toxoplasma_gondii_GT1 | gene_product=hypothetical protein | transcript_product=hypothetical protein | location=TGGT1_chrX:6501033-6502602(+) | protein_length=195 | sequence_SO=chromosome | SO=protein_coding_gene | is_pseudo=false	0	9.397	8	1	5	1	195	21.5	3.68	5.42	1	0.417	0.48	-1.26	-1.06	0.00284681	0.107643	0.0409737	0.549118	9.57	9.53	0.69	-1.35	-1.26	-1.15	-1.06	-0.7	196945	163026	339759	72.73	39.92	22.11	515737	132985	196945	143810	163026	289955	208085	225072	312479	415081	339877	472659
FALSE	High	Master Protein	TGGT1_297880-t26_1-p1	transcript=TGGT1_297880-t26_1 | gene=TGGT1_297880 | organism=Toxoplasma_gondii_GT1 | gene_product=Dense granule protein DG32 [Source:UniProtKB/TrEMBL;Acc:A0A125YME3] | transcript_product=dense granule protein DG32 | location=TGGT1_chrII:2069382-2070384(-) | protein_length=219 | sequence_SO=chromosome | SO=protein_coding_gene | is_pseudo=false	0	9.381	11	1	9	1	219	24.1	9.57	22.3	1	1.825	1.683	0.87	0.75	0.167088	0.0827142	0.680167	0.459777	83.25	5.74	-0.32	0.87	2.03	-1.58	0.81	0.75	437444	336293	239748	43.35	43.63	48.93	380920	437444	815060	158834	419089	336293	327023	239748	146300	476141	513985	591270
FALSE	High	Master Protein	TGGT1_260210-t26_1-p1	transcript=TGGT1_260210-t26_1 | gene=TGGT1_260210 | organism=Toxoplasma_gondii_GT1 | gene_product=G domain-containing protein [Source:UniProtKB/TrEMBL;Acc:S7WEI2] | transcript_product=DnaJ domain-containing protein | location=TGGT1_chrVIIb:2423937-2433987(+) | protein_length=1036 | sequence_SO=chromosome | SO=protein_coding_gene | is_pseudo=false	0	9.368	3	1	1	1	1036	113.6	9.57	3.59	1	5.604	0.097	2.49	-3.36	2.61785e-06	4.60506e-09	8.79162e-05	8.24818e-08	17.55	713.73	2.49	2.3	6.64	-0.08	-6.64		117216	19804.7	24925.8	43.95		24.55	117216	146762	55154.5	19804.7			18827.8	33621.5		23235
FALSE	High	Master Protein	TGGT1_210980-t26_1-p1	transcript=TGGT1_210980-t26_1 | gene=TGGT1_210980 | organism=Toxoplasma_gondii_GT1 | gene_product=Putative alternative splicing type 3 and [Source:UniProtKB/TrEMBL;Acc:S7UKQ1] | transcript_product=putative alternative splicing type 3 and | location=TGGT1_chrIV:1920085-1926796(-) | protein_length=554 | sequence_SO=chromosome | SO=protein_coding_gene | is_pseudo=false	0	9.368	10	4	6	4	554	64.5	8	0	4	2.421	0.226	1.28	-2.14	0.0266125	0.000306093	0.233148	0.00432826	40.84	92.14	1.28	1.63	0.44	-2.14	-3.06	-0.74	948346	32178.9	402521	21.97	92.95	16.49	948346	1.04214e+06	667971	32178.9	5213.18	73339.7	132634	71601.9	91927.2	580168	473723	655282
FALSE	High	Master Protein	TGGT1_257530-t26_1-p1	transcript=TGGT1_257530-t26_1 | gene=TGGT1_257530 | organism=Toxoplasma_gondii_GT1 | gene_product=Transporter, major facilitator family protein [Source:UniProtKB/TrEMBL;Acc:S7W7U8] | transcript_product=transporter, major facilitator family protein | location=TGGT1_chrVIIb:3924727-3926365(-) | protein_length=504 | sequence_SO=chromosome | SO=protein_coding_gene | is_pseudo=false	0	9.353	6	2	20	2	504	54.5	6.71	9.36	2	1.209	1.067	0.27	0.09	0.869169	0.602926	0.995562	0.973941	25.84	2.86	0.27	0.55	0	0.07	0.18	0.09	1.23558e+06	1.05223e+06	1.01494e+06	1.89	9.4	18.32	1.20143e+06	1.24575e+06	1.23558e+06	1.05223e+06	911137	1.09393e+06	1.0544e+06	791976	1.14928e+06	1.01494e+06	1.34473e+06	1.37517e+06
FALSE	High	Master Protein	TGGT1_245460-t26_1-p1	transcript=TGGT1_245460-t26_1 | gene=TGGT1_245460 | organism=Toxoplasma_gondii_GT1 | gene_product=40S ribosomal protein S8 [Source:UniProtKB/TrEMBL;Acc:S7WHE0] | transcript_product=ribosomal protein RPS8 | location=TGGT1_chrXII:2220293-2224095(-) | protein_length=205 | sequence_SO=chromosome | SO=protein_coding_gene | is_pseudo=false	0	9.332	18	3	6	3	205	23.4	10.64	2.54	3	1.809	0.847	0.86	-0.24	0.174908	0.925238	0.691058	0.987776	92.56	36.55	1.56	0.86	-0.71	-0.56	-0.24	0.22	698916	349010	428757	52.82	63.33	38.37	1.31893e+06	698916	472022	280482	349010	853866	328358	343415	749349	428757	588274	751438
FALSE	High	Master Protein	TGGT1_229670-t26_1-p1	transcript=TGGT1_229670-t26_1 | gene=TGGT1_229670 | organism=Toxoplasma_gondii_GT1 | gene_product=Ribosomal protein RPS23 [Source:UniProtKB/TrEMBL;Acc:A0A125YRX1] | transcript_product=ribosomal protein RPS23 | location=TGGT1_chrVIII:368147-371053(+) | protein_length=143 | sequence_SO=chromosome | SO=protein_coding_gene | is_pseudo=false	0	9.331	21	3	9	3	143	15.8	10.83	6	3	1.375	0.791	0.46	-0.34	0.584859	0.782174	0.971725	0.986441	61.16	14.19	1.27	0.46	-0.31	-0.47	-0.34	0.17	1.05047e+06	500127	582204	23.13	53.53	40.99	1.46879e+06	967078	1.05047e+06	488141	500127	1.15703e+06	561640	582204	1.10341e+06	551804	824600	1.4635e+06
FALSE	High	Master Protein	TGGT1_280380-t26_1-p1	transcript=TGGT1_280380-t26_1 | gene=TGGT1_280380 | organism=Toxoplasma_gondii_GT1 | gene_product=Poly(ADP-ribose) glycohydrolase [Source:UniProtKB/TrEMBL;Acc:S7W2K3] | transcript_product=poly(ADP-ribose) glycohydrolase | location=TGGT1_chrVIIa:467123-469417(+) | protein_length=553 | sequence_SO=chromosome | SO=protein_coding_gene | is_pseudo=false	0	9.317	6	2	7	2	553	61.8	7.94	2.69	2	1.157	1.262	0.21	0.34	0.971359	0.333096	0.995562	0.875727	2.64	32.31	0.1	0.21	0.24	0.74	0.34	-0.02	284663	326004	267076	8.09	21.27	13.56	252623	284663	295959	393100	326004	254980	246520	267076	272235	174602	267873	296850
FALSE	High	Master Protein	TGGT1_249970-t26_1-p1	transcript=TGGT1_249970-t26_1 | gene=TGGT1_249970 | organism=Toxoplasma_gondii_GT1 | gene_product=PH domain-containing protein [Source:UniProtKB/TrEMBL;Acc:S7V0B0] | transcript_product=hypothetical protein | location=TGGT1_chrXII:4900104-4901997(+) | protein_length=229 | sequence_SO=chromosome | SO=protein_coding_gene | is_pseudo=false	0	9.303	12	2	4	2	229	24.7	9.58	7.31	2	0.644	1.03	-0.63	0.04	0.0900029	0.669662	0.485304	0.973941	52.49	7.64	-1.72	-0.63	0	-0.03	0.04	0.82	210500	427866	306100	33.53	20	38.81	133097	210500	269801	476807	317680	427866	554645	306100	386881	225533	300917	240577
FALSE	High	Master Protein	TGGT1_292010-t26_1-p1	transcript=TGGT1_292010-t26_1 | gene=TGGT1_292010 | organism=Toxoplasma_gondii_GT1 | gene_product=TFIIB-type domain-containing protein [Source:UniProtKB/TrEMBL;Acc:S7UPQ1] | transcript_product=transcription initiation factor IIB | location=TGGT1_chrIX:4278558-4280825(-) | protein_length=458 | sequence_SO=chromosome | SO=protein_coding_gene | is_pseudo=false	0	9.243	5	2	6	2	458	48.5	9.64	7.23	2	1.358	1.457	0.44	0.54	0.61077	0.176549	0.971725	0.680855	12.39	11.72	0.44	0.56	0.14	0.4	0.54	0.65	87477.3	86618.8	68929.4	22.44	28.93	27.89	115609	87477.3	75002.5	58552.4	86618.8	106973	44446.8	59440.8	68030.9	49250.9	68929.4	87477.9
FALSE	High	Master Protein	TGGT1_224210-t26_1-p1	transcript=TGGT1_224210-t26_1 | gene=TGGT1_224210 | organism=Toxoplasma_gondii_GT1 | gene_product=C2 NT-type domain-containing protein [Source:UniProtKB/TrEMBL;Acc:S7WBT8] | transcript_product=hypothetical protein | location=TGGT1_chrX:3128859-3139913(-) | protein_length=1175 | sequence_SO=chromosome | SO=protein_coding_gene | is_pseudo=false	0	9.129	3	2	3	2	1175	129.4	7.71	2.58	2	4.702	1.586	2.23	0.67	2.91316e-05	0.114608	0.000838574	0.563258	119.61	15.01	3.15	2.23	-0.14	-0.61	0.8	0.67	403226	96581.5	82727.9	69.61	69.21	35.95	495417	403226	68815.7	17166	96581.5	120152	17431.8	102165	82727.9	97436	86943	149888
FALSE	High	Master Protein	TGGT1_316490-t26_1-p1	transcript=TGGT1_316490-t26_1 | gene=TGGT1_316490 | organism=Toxoplasma_gondii_GT1 | gene_product=DUF2040 domain-containing protein [Source:UniProtKB/TrEMBL;Acc:S7W118] | transcript_product=hypothetical protein | location=TGGT1_chrXI:5289549-5291741(+) | protein_length=492 | sequence_SO=chromosome | SO=protein_coding_gene | is_pseudo=false	0	9.085	6	3	8	3	492	53.2	6.43	4.04	3	1.858	0.65	0.89	-0.62	0.151025	0.423347	0.644054	0.920068	18.76	22.99	0.7	1.26	0.89	-0.62	-0.83	-0.3	585166	148619	278216	17.05	49.21	21.69	429116	588674	585166	112063	148619	280933	278216	160699	364898	330416	350912	326855
FALSE	High	Master Protein	TGGT1_215220-t26_1-p1	transcript=TGGT1_215220-t26_1 | gene=TGGT1_215220 | organism=Toxoplasma_gondii_GT1 | gene_product=hypothetical protein | transcript_product=hypothetical protein | location=TGGT1_chrX:6716950-6719044(+) | protein_length=502 | sequence_SO=chromosome | SO=protein_coding_gene | is_pseudo=false	0	9.084	17	3	21	3	502	55.1	5.36	21.51	3	1.045	0.719	0.06	-0.48	0.790268	0.596117	0.995562	0.973941	34.48	2.98	0.37	-0.36	0.06	-0.45	-0.48	-1.29	1.77773e+06	1.28398e+06	1.47707e+06	21.94	10.24	45.19	1.82828e+06	1.19618e+06	1.77773e+06	1.08008e+06	1.28398e+06	1.30841e+06	1.25834e+06	1.24955e+06	1.38555e+06	1.43867e+06	1.47707e+06	3.00151e+06
FALSE	High	Master Protein	TGGT1_218260-t26_1-p1	transcript=TGGT1_218260-t26_1 | gene=TGGT1_218260 | organism=Toxoplasma_gondii_GT1 | gene_product=Histone H3 [Source:UniProtKB/TrEMBL;Acc:A0A125YLK7] | transcript_product=histone H3.3 | location=TGGT1_chrXII:1578063-1578473(+) | protein_length=136 | sequence_SO=chromosome | SO=protein_coding_gene | is_pseudo=false	0	9.023	17	3	34	3	136	15.4	11.3	49.34	3	0.637	0.528	-0.65	-0.92	0.083452	0.176493	0.4671	0.680855	6.14	11.57	0.05	-0.71	-0.65	-1.03	-0.64	-0.92	1.18639e+07	7.45696e+06	1.63897e+07	27.3	20.21	18.11	1.7202e+07	1.03762e+07	1.18639e+07	6.58493e+06	7.45696e+06	9.68418e+06	8.61711e+06	9.07335e+06	1.37165e+07	1.63897e+07	1.36673e+07	1.85835e+07
FALSE	High	Master Protein	TGGT1_288380-t26_1-p1	transcript=TGGT1_288380-t26_1 | gene=TGGT1_288380 | organism=Toxoplasma_gondii_GT1 | gene_product=HATPase_c domain-containing protein [Source:UniProtKB/TrEMBL;Acc:A0A125YVB6] | transcript_product=heat shock protein HSP90 | location=TGGT1_chrIX:2294323-2298742(+) | protein_length=708 | sequence_SO=chromosome | SO=protein_coding_gene | is_pseudo=false	0	8.991	3	2	11	2	708	81.9	5.03	5.4	2	0.862	0.889	-0.21	-0.17	0.4047	0.972178	0.949873	0.987776	28.66	26.34	0.1	-0.21	-0.75	-0.17	0.11	-0.43	383465	467247	490073	7.43	24.05	33.96	420503	383465	363515	337360	467247	553691	418846	490073	779712	437261	336655	436361
FALSE	High	Master Protein	TGGT1_310700-t26_1-p1	transcript=TGGT1_310700-t26_1 | gene=TGGT1_310700 | organism=Toxoplasma_gondii_GT1 | gene_product=Serine/threonine-protein phosphatase [Source:UniProtKB/TrEMBL;Acc:A0A125YY12] | transcript_product=serine/threonine phosophatase PP1 | location=TGGT1_chrXI:1487440-1488915(-) | protein_length=306 | sequence_SO=chromosome | SO=protein_coding_gene | is_pseudo=false	0	8.9	11	2	4	2	306	35	5.72	2.75	2	1.853	0.829	0.89	-0.27	0.153508	0.879722	0.64779	0.987776	29.41	26.61	0.25	1.15	0.89	-0.27	0.02	-0.8	198877	73041.8	88086.4	15.51	42.71	45.63	151743	198877	203540	90008.4	34962.7	73041.8	91598.1	26134.8	88086.4	95296.7	109285	241012
FALSE	High	Master Protein	TGGT1_273920-t26_1-p1	transcript=TGGT1_273920-t26_1 | gene=TGGT1_273920 | organism=Toxoplasma_gondii_GT1 | gene_product=Aldo_ket_red domain-containing protein [Source:UniProtKB/TrEMBL;Acc:S7V3L0] | transcript_product=putative aldose reductase | location=TGGT1_chrVIII:3169259-3173466(+) | protein_length=537 | sequence_SO=chromosome | SO=protein_coding_gene | is_pseudo=false	0	8.9	7	3	11	3	537	58.7	8.47	2.25	3	1.233	0.817	0.3	-0.29	0.824303	0.848937	0.995562	0.987776	10.71	15.37	1.23	0.3	0.19	-0.29	-0.43	-0.1	585593	359707	387354	28.27	28.27	11.44	857125	585593	506895	260523	359707	465024	387354	396238	254988	593558	464733	558432
FALSE	High	Master Protein	TGGT1_220400-t26_1-p1	transcript=TGGT1_220400-t26_1 | gene=TGGT1_220400 | organism=Toxoplasma_gondii_GT1 | gene_product=ADF-H domain-containing protein [Source:UniProtKB/TrEMBL;Acc:A0A125YJR5] | transcript_product=actin depolymerizing factor ADF | location=TGGT1_chrV:254875-256188(-) | protein_length=118 | sequence_SO=chromosome | SO=protein_coding_gene | is_pseudo=false	0	8.868	19	1	1	1	118	12.9	7.75	3.42	1	1.006	1.095	0.01	0.13	0.704201	0.555329	0.971725	0.962677	10.64	1.65	0.21	-0.1	0.01	0.13	0.11	0.16	440760	443717	409781	13.91	16.3	14.79	440760	382485	505670	416964	443717	562246	457445	410490	617626	286364	409781	502883
FALSE	High	Master Protein	TGGT1_221590-t26_1-p1	transcript=TGGT1_221590-t26_1 | gene=TGGT1_221590 | organism=Toxoplasma_gondii_GT1 | gene_product=Dual specificity phosphatase, catalytic domain-containing protein [Source:UniProtKB/TrEMBL;Acc:A0A125YN04] | transcript_product=dual specificity phosphatase, catalytic domain-containing protein | location=TGGT1_chrII:450572-453205(+) | protein_length=356 | sequence_SO=chromosome | SO=protein_coding_g…	0	8.842	9	2	14	2	356	38.8	9.77	9	2	1.698	0.656	0.76	-0.61	0.242154	0.437904	0.820069	0.924827	11.89	26.55	0.76	0.88	0.53	-0.2	-0.85	-0.61	423790	180194	241957	25.51	16.14	5.62	423790	561253	338203	207601	149794	180194	207519	266228	160670	241801	268846	305863
FALSE	High	Master Protein	TGGT1_289290-t26_1-p1	transcript=TGGT1_289290-t26_1 | gene=TGGT1_289290 | organism=Toxoplasma_gondii_GT1 | gene_product=hypothetical protein | transcript_product=hypothetical protein | location=TGGT1_chrIX:2957612-2961198(-) | protein_length=510 | sequence_SO=chromosome | SO=protein_coding_gene | is_pseudo=false	0	8.827	6	2	3	2	510	55.4	8.87	4.01	2	0.84	0.997	-0.25	0	0.362577	0.733907	0.938934	0.976829	0.34	24.89	-0.39	-0.25	-0.25	-0.23	0.33	0	153869	145880	135479	14.07	12.52	10.71	168158	153869	126715	145880	163613	127160	160565	132802	135479	142308	106366	126019
FALSE	High	Master Protein	TGGT1_214840-t26_1-p1	transcript=TGGT1_214840-t26_1 | gene=TGGT1_214840 | organism=Toxoplasma_gondii_GT1 | gene_product=AP2 domain transcription factor AP2X-7 [Source:UniProtKB/TrEMBL;Acc:S7UQH1] | transcript_product=AP2 domain transcription factor AP2X-7 | location=TGGT1_chrX:6426532-6432141(+) | protein_length=1869 | sequence_SO=chromosome | SO=protein_coding_gene | is_pseudo=false	0	8.72	1	4	13	4	1869	183.9	5.15	11.16	4	0.698	0.968	-0.52	-0.05	0.145009	0.793083	0.63177	0.987776	13.85	15.86	-0.38	-0.84	-0.52	-0.05	0.12	-0.53	828379	1.23727e+06	1.2344e+06	18.7	24.54	3.8	1.01492e+06	699647	828379	1.23727e+06	1.27629e+06	789990	1.17795e+06	1.27061e+06	887936	1.09463e+06	825734	1.2344e+06
FALSE	High	Master Protein	TGGT1_285950-t26_1-p1	transcript=TGGT1_285950-t26_1 | gene=TGGT1_285950 | organism=Toxoplasma_gondii_GT1 | gene_product=hypothetical protein | transcript_product=hypothetical protein | location=TGGT1_chrV:1971631-1977769(+) | protein_length=833 | sequence_SO=chromosome | SO=protein_coding_gene | is_pseudo=false	0	8.676	4	2	4	2	833	91.1	8.43	2.97	2	1.468	0.701	0.55	-0.51	0.459743	0.549731	0.949873	0.962677	3.2	43.73	0.55	0.58	0.15	-0.51	-0.01	-2.28	225288	111711	160097	19.04	73.45	10.99	225288	240860	165012	111711	167122	21455.2	87831.9	160097	77082.1	159342	197178	233982
FALSE	High	Master Protein	TGGT1_269180-t26_1-p1	transcript=TGGT1_269180-t26_1 | gene=TGGT1_269180 | organism=Toxoplasma_gondii_GT1 | gene_product=MIF4G domain-containing protein [Source:UniProtKB/TrEMBL;Acc:S7WKZ1] | transcript_product=MIF4G domain-containing protein | location=TGGT1_chrVIII:6008955-6021323(-) | protein_length=2668 | sequence_SO=chromosome | SO=protein_coding_gene | is_pseudo=false	0	8.623	1	3	6	3	2668	272.9	9.25	9.68	3	1.127	0.854	0.17	-0.23	0.965163	0.942948	0.995562	0.987776	1.74	23.76	0.17	0.23	0.15	-0.23	0.02	-1.06	328387	295777	424860	17.6	34.07	10.96	368791	258029	328387	309521	295777	153794	350946	424860	292628	279864	235420	429324
FALSE	High	Master Protein	TGGT1_226890-t26_1-p1	transcript=TGGT1_226890-t26_1 | gene=TGGT1_226890 | organism=Toxoplasma_gondii_GT1 | gene_product=ORC_WH_C domain-containing protein [Source:UniProtKB/TrEMBL;Acc:S7WD02] | transcript_product=hypothetical protein | location=TGGT1_chrX:1166477-1173027(+) | protein_length=2068 | sequence_SO=chromosome | SO=protein_coding_gene | is_pseudo=false	0	8.575	2	2	5	2	2068	223.6	6.47	2.07	2	2.851	1.609	1.51	0.69	0.0069089	0.106376	0.0918126	0.549118	94.21	2.69	2.31	1.51	0.06	0.05	0.69	0.71	380572	214474	119533	61.31	35.6	11	566517	380572	128548	104952	214474	215223	88404.5	222166	126772	106121	119533	249723
FALSE	High	Master Protein	TGGT1_259240-t26_1-p1	transcript=TGGT1_259240-t26_1 | gene=TGGT1_259240 | organism=Toxoplasma_gondii_GT1 | gene_product=40S ribosomal protein S21 [Source:UniProtKB/TrEMBL;Acc:S7WEL7] | transcript_product=ribosomal protein RPS21 | location=TGGT1_chrVIIb:2808644-2809838(-) | protein_length=82 | sequence_SO=chromosome | SO=protein_coding_gene | is_pseudo=false	0	8.567	30	2	5	2	82	9	8.05	8.96	2	0.93	0.861	-0.1	-0.22	0.542128	0.958834	0.956387	0.987776	30.25	18.53	0.84	-0.1	-0.37	-0.39	-0.22	0.42	253670	188335	221112	34.3	52.81	24.92	379755	194421	253670	162664	188335	404897	204618	242754	490825	182166	221112	233948
FALSE	High	Master Protein	TGGT1_249910-t26_1-p1	transcript=TGGT1_249910-t26_1 | gene=TGGT1_249910 | organism=Toxoplasma_gondii_GT1 | gene_product=Putative mitochondria-associated granulocyte macrophage CSF signaling molecule [Source:UniProtKB/TrEMBL;Acc:A0A125YFU1] | transcript_product=putative mitochondria-associated granulocyte macrophage CSF signaling molecule | location=TGGT1_chrXII:4876403-4877496(-) | protein_length=136 | sequence_SO=chr…	0	8.545	26	3	14	3	136	14.6	10.18	2.25	3	0.896	0.954	-0.16	-0.07	0.470223	0.824135	0.949873	0.987776	9.29	46.05	-0.16	-0.74	-0.07	0.47	-0.07	-0.74	774153	945131	1.14931e+06	20.85	26.71	11.83	774153	676329	1.00894e+06	1.22701e+06	945131	713883	749227	790977	1.05641e+06	976775	1.23762e+06	1.14931e+06
FALSE	High	Master Protein	TGGT1_207840-t26_1-p1	transcript=TGGT1_207840-t26_1 | gene=TGGT1_207840 | organism=Toxoplasma_gondii_GT1 | gene_product=Ribosomal protein RPS17 [Source:UniProtKB/TrEMBL;Acc:A0A125YWE7] | transcript_product=ribosomal protein RPS17 | location=TGGT1_chrIb:342658-344358(-) | protein_length=132 | sequence_SO=chromosome | SO=protein_coding_gene | is_pseudo=false	0	8.48	30	3	10	3	132	15.2	10.7	3.31	3	1.685	0.819	0.75	-0.29	0.251823	0.854416	0.838715	0.987776	52.91	9.02	1.21	0.75	0.12	-0.52	-0.29	-0.2	759594	392239	480179	50	18.23	33.6	1.53326e+06	759594	632466	392239	386167	526414	316843	480179	569393	472613	542826	885803
FALSE	High	Master Protein	TGGT1_315300-t26_1-p1	transcript=TGGT1_315300-t26_1 | gene=TGGT1_315300 | organism=Toxoplasma_gondii_GT1 | gene_product=DUF667 domain-containing protein [Source:UniProtKB/TrEMBL;Acc:A0A125YSW5] | transcript_product=putative transcription factor IIB | location=TGGT1_chrXI:4583866-4586373(-) | protein_length=191 | sequence_SO=chromosome | SO=protein_coding_gene | is_pseudo=false	0	8.355	17	3	6	3	191	22.5	9.33	5.46	3	1.902	1.595	0.93	0.67	0.132285	0.111198	0.605807	0.55668	20.19	20.14	0.93	1.53	0.72	0.67	0.46	1.01	620733	410847	356263	21.92	50.81	22.93	559278	840118	620733	410847	233835	679138	356263	251015	596143	407459	497194	401235
FALSE	High	Master Protein	TGGT1_270010-t26_1-p1	transcript=TGGT1_270010-t26_1 | gene=TGGT1_270010 | organism=Toxoplasma_gondii_GT1 | gene_product=hypothetical protein | transcript_product=hypothetical protein | location=TGGT1_chrVIII:5449261-5457417(-) | protein_length=556 | sequence_SO=chromosome | SO=protein_coding_gene | is_pseudo=false	0	8.313	5	2	3	2	556	59.2	9.23	2.11	2	1.068	0.973	0.09	-0.04	0.84038	0.783278	0.995562	0.986441	5.46	15.16	0.15	-0.23	0.09	0.22	-0.04	-0.18	181716	263103	227514	31.78	14.87	17.17	233021	181716	119909	263103	204408	271767	227514	217558	287127	250128	214524	333366
FALSE	High	Master Protein	TGGT1_228100-t26_1-p1	transcript=TGGT1_228100-t26_1 | gene=TGGT1_228100 | organism=Toxoplasma_gondii_GT1 | gene_product=hypothetical protein | transcript_product=hypothetical protein | location=TGGT1_chrX:493043-502437(-) | protein_length=1314 | sequence_SO=chromosome | SO=protein_coding_gene | is_pseudo=false	0	8.304	3	3	3	3	1314	139.3	8.31	0	3	1.496	0.795	0.58	-0.33	0.42676	0.791588	0.949873	0.987776	13.7	5.41	0.71	0.58	-0.46	-0.33	-0.28	-0.48	164461	30418.1	98500	18.33	61.36	40.94	122134	175718	164461	24821.7	30418.1	72678.2	48541.1	37516.6	34861.3	106764	53640.8	241889
FALSE	High	Master Protein	TGGT1_225850-t26_1-p1	transcript=TGGT1_225850-t26_1 | gene=TGGT1_225850 | organism=Toxoplasma_gondii_GT1 | gene_product=Peptidase_M28 domain-containing protein [Source:UniProtKB/TrEMBL;Acc:S7W5H3] | transcript_product=peptidase, M28 family protein | location=TGGT1_chrX:1906784-1917654(+) | protein_length=1555 | sequence_SO=chromosome | SO=protein_coding_gene | is_pseudo=false	0	8.297	3	3	6	3	1555	167.6	8.69	2.12	3	0.612	0.915	-0.71	-0.13	0.0649657	0.911852	0.404307	0.987776	2.53	11.73	-0.01	-0.73	-0.71	-0.01	-0.13	-1.39	108519	120842	169559	29.33	37.81	15.68	145194	80094.5	108519	139323	120842	61668.7	80377.4	73599.8	77405.3	155995	169559	209785
FALSE	High	Master Protein	TGGT1_258110-t26_1-p1	transcript=TGGT1_258110-t26_1 | gene=TGGT1_258110 | organism=Toxoplasma_gondii_GT1 | gene_product=N-acetylglucosaminylphosphatidylinositol deacetylase [Source:UniProtKB/TrEMBL;Acc:S7UYL4] | transcript_product=N-acetylglucosaminylphosphatidylinositol deacetylase | location=TGGT1_chrVIIb:3532662-3536407(-) | protein_length=383 | sequence_SO=chromosome | SO=protein_coding_gene | is_pseudo=false	0	8.221	9	2	5	2	383	43.4	9.31	2.53	2	1.138	0.801	0.19	-0.32	0.987927	0.807661	0.998872	0.987776	3.41	26.36	0.19	0.54	0.15	-0.32	-0.04	-1.04	295908	195170	312763	4.61	1.41	14.47	273861	295908	297863	192834	198311	195170	148162	163340	202377	240754	365563	313635
FALSE	High	Master Protein	TGGT1_275810-t26_1-p1	transcript=TGGT1_275810-t26_1 | gene=TGGT1_275810 | organism=Toxoplasma_gondii_GT1 | gene_product=S10_plectin domain-containing protein [Source:UniProtKB/TrEMBL;Acc:A0A125YIP7] | transcript_product=ribosomal protein RPS10 | location=TGGT1_chrIII:201999-204232(+) | protein_length=152 | sequence_SO=chromosome | SO=protein_coding_gene | is_pseudo=false	0	8.205	21	3	24	3	152	17.4	10.14	13.77	3	1.468	0.873	0.55	-0.2	0.459501	0.988787	0.949873	0.992481	12.27	13.65	0.67	0.55	0.32	-0.32	-0.2	0.21	1.69137e+06	1.13099e+06	1.28279e+06	17.98	21.57	11.42	2.23855e+06	1.69137e+06	1.63471e+06	1.08064e+06	1.13099e+06	1.57546e+06	1.28279e+06	1.26194e+06	1.74985e+06	1.23229e+06	1.52125e+06	1.54117e+06
FALSE	High	Master Protein	TGGT1_217890-t26_1-p1	transcript=TGGT1_217890-t26_1 | gene=TGGT1_217890 | organism=Toxoplasma_gondii_GT1 | gene_product=Peroxiredoxin [Source:UniProtKB/TrEMBL;Acc:A0A125YNG7] | transcript_product=putative alkyl hydroperoxide reductase/ Thiol specific antioxidant/ Mal allergen | location=TGGT1_chrXII:2143499-2144089(-) | protein_length=196 | sequence_SO=chromosome | SO=protein_coding_gene | is_pseudo=false	0	8.184	14	2	4	2	196	21.7	6.87	5.58	2	1.505	0.644	0.59	-0.63	0.416843	0.41054	0.949873	0.920068	50.75	7.99	0.59	1.05	-0.02	-0.63	-0.52	-0.71	370402	153188	248757	15.91	6.91	19.77	370402	402446	292595	147317	153188	168260	105236	159007	267254	248757	392730	403442
FALSE	High	Master Protein	TGGT1_266070-t26_1-p1	transcript=TGGT1_266070-t26_1 | gene=TGGT1_266070 | organism=Toxoplasma_gondii_GT1 | gene_product=Ribosomal protein RPL31 [Source:UniProtKB/TrEMBL;Acc:A0A125YYY2] | transcript_product=ribosomal protein RPL31 | location=TGGT1_chrIX:1142823-1144192(+) | protein_length=120 | sequence_SO=chromosome | SO=protein_coding_gene | is_pseudo=false	0	8.18	21	2	19	2	120	14.3	10.68	13.55	2	1.437	0.628	0.52	-0.67	0.499064	0.372536	0.951523	0.888356	25.28	37.43	0.52	0.78	0.25	-1	-0.67	-0.23	2.39941e+06	1.04632e+06	1.77596e+06	16.57	29.29	20.22	2.96673e+06	2.39941e+06	2.15714e+06	1.04632e+06	864519	1.51252e+06	1.30459e+06	1.01178e+06	1.77596e+06	2.16947e+06	2.67688e+06	2.52578e+06
FALSE	High	Master Protein	TGGT1_254440-t26_1-p1	transcript=TGGT1_254440-t26_1 | gene=TGGT1_254440 | organism=Toxoplasma_gondii_GT1 | gene_product=Ribosomal protein RPL12 [Source:UniProtKB/TrEMBL;Acc:A0A125YT48] | transcript_product=ribosomal protein RPL12 | location=TGGT1_chrIII:1720222-1723221(-) | protein_length=165 | sequence_SO=chromosome | SO=protein_coding_gene | is_pseudo=false	0	8.117	16	2	13	2	165	17.8	9.42	18.45	2	1.287	0.928	0.36	-0.11	0.727227	0.881763	0.981806	0.987776	3.63	1.07	0.36	0.4	-0.18	-0.69	-0.1	-0.11	718398	513631	686854	12.32	26.82	27.54	865849	718398	692571	425276	513631	713645	450501	531865	651671	686854	571350	937238
FALSE	High	Master Protein	TGGT1_257980-t26_1-p1	transcript=TGGT1_257980-t26_1 | gene=TGGT1_257980 | organism=Toxoplasma_gondii_GT1 | gene_product=RRF domain-containing protein [Source:UniProtKB/TrEMBL;Acc:S7UYJ6] | transcript_product=ribosome recycling factor protein | location=TGGT1_chrVIIb:3647916-3653274(-) | protein_length=468 | sequence_SO=chromosome | SO=protein_coding_gene | is_pseudo=false	0	8.116	5	2	14	2	468	52	10.62	11.41	2	0.927	0.766	-0.11	-0.38	0.534648	0.716901	0.953376	0.973941	14.26	4.8	0.09	-0.11	-0.24	-0.61	-0.38	-0.34	300686	239382	300790	7.18	8.57	8.7	326453	300686	283131	223813	239382	265033	300790	271185	333444	288879	290203	341435
FALSE	High	Master Protein	TGGT1_305850-t26_1-p1	transcript=TGGT1_305850-t26_1 | gene=TGGT1_305850 | organism=Toxoplasma_gondii_GT1 | gene_product=RNA recognition motif-containing protein [Source:UniProtKB/TrEMBL;Acc:A0A125YMV7] | transcript_product=RNA recognition motif-containing protein | location=TGGT1_chrIX:5399604-5403723(-) | protein_length=372 | sequence_SO=chromosome | SO=protein_coding_gene | is_pseudo=false	0	8.054	9	4	10	4	372	39.1	9.63	3.5	4	0.969	0.632	-0.05	-0.66	0.624279	0.380878	0.971725	0.892961	0.42	6.24	-0.04	-0.05	-0.65	-0.66	-0.6	-1.59	519195	432790	782487	26.79	25.38	9.08	795401	519195	508140	488480	432790	289838	450603	498756	422684	782487	702583	843075
FALSE	High	Master Protein	TGGT1_263440-t26_1-p1	transcript=TGGT1_263440-t26_1 | gene=TGGT1_263440 | organism=Toxoplasma_gondii_GT1 | gene_product=hypothetical protein | transcript_product=hypothetical protein | location=TGGT1_chrVIIb:523665-529194(-) | protein_length=600 | sequence_SO=chromosome | SO=protein_coding_gene | is_pseudo=false	0	8.002	4	2	5	2	600	66.5	9.96	0	2	0.871	0.755	-0.2	-0.41	0.420364	0.688886	0.949873	0.973941	10.89	2.37	-0.09	-0.2	-0.47	0.04	-0.43	-0.41	211628	204105	240396	8.66	15.88	7.97	237652	201195	211628	251420	185625	204105	240396	175613	255471	230887	217783	224321
FALSE	High	Master Protein	TGGT1_205340-t26_1-p1	transcript=TGGT1_205340-t26_1 | gene=TGGT1_205340 | organism=Toxoplasma_gondii_GT1 | gene_product=40S ribosomal protein S12 [Source:UniProtKB/TrEMBL;Acc:A0A125YN62] | transcript_product=ribosomal protein RPS12 | location=TGGT1_chrVIIa:1379775-1380954(+) | protein_length=142 | sequence_SO=chromosome | SO=protein_coding_gene | is_pseudo=false	0	7.979	16	2	13	2	142	15.4	5.01	17.46	2	1.608	0.819	0.69	-0.29	0.313617	0.852753	0.915853	0.987776	55	32.24	1.14	0.69	-0.05	-0.57	-0.29	0.14	560131	239365	367220	29.67	59.15	41.51	827836	474692	560131	239365	237696	609667	265926	291881	653499	367220	466972	631990
FALSE	High	Master Protein	TGGT1_213350-t26_1-p1	transcript=TGGT1_213350-t26_1 | gene=TGGT1_213350 | organism=Toxoplasma_gondii_GT1 | gene_product=Ribosomal protein RPS15 [Source:UniProtKB/TrEMBL;Acc:A0A125YHZ1] | transcript_product=ribosomal protein RPS15 | location=TGGT1_chrV:820008-821446(-) | protein_length=150 | sequence_SO=chromosome | SO=protein_coding_gene | is_pseudo=false	0	7.97	17	2	15	2	150	17.1	10.2	4.03	2	1.997	0.933	1	-0.1	0.0991354	0.870978	0.518852	0.987776	24.4	12.5	1.22	1	0.12	-0.38	0.03	-0.1	1.82665e+06	977075	1.209e+06	31.53	17.65	23.77	2.67849e+06	1.82665e+06	1.45657e+06	977075	903455	1.25307e+06	1.02745e+06	781862	1.0174e+06	1.34863e+06	1.03333e+06	1.89942e+06
FALSE	High	Master Protein	TGGT1_278830-t26_1-p1	transcript=TGGT1_278830-t26_1 | gene=TGGT1_278830 | organism=Toxoplasma_gondii_GT1 | gene_product=Glucose-6-phosphate 1-dehydrogenase [Source:UniProtKB/TrEMBL;Acc:S7UZN8] | transcript_product=glucose-6-phosphate 1-dehydrogenase | location=TGGT1_chrXII:5748919-5762087(+) | protein_length=878 | sequence_SO=chromosome | SO=protein_coding_gene | is_pseudo=false	0	7.968	4	2	3	2	878	98.2	7.25	2	2	1.755	0.709	0.81	-0.5	0.205372	0.569366	0.780799	0.962677	39.24	2.55	1.15	0.81	-0.03	-0.5	-0.18	-0.52	212853	91518.2	119205	33.68	13.98	8.01	262647	212853	128501	83710.8	109592	91518.2	68407.9	116764	88193	119205	129593	162446
FALSE	High	Master Protein	TGGT1_204340-t26_1-p1	transcript=TGGT1_204340-t26_1 | gene=TGGT1_204340 | organism=Toxoplasma_gondii_GT1 | gene_product=hypothetical protein | transcript_product=hypothetical protein | location=TGGT1_chrVIIa:1770608-1775101(-) | protein_length=877 | sequence_SO=chromosome | SO=protein_coding_gene | is_pseudo=false	0	7.958	7	3	3	3	877	97.2	6.11	0	3	0.921	1.319	-0.12	0.4	0.523573	0.277517	0.951523	0.818481	20.63	5.28	0.54	-0.31	-0.12	0.4	0.45	-0.14	230898	297956	196341	15.41	24.18	38.98	281368	209151	230898	297956	348912	211960	195922	234830	100640	196341	349539	271677
FALSE	High	Master Protein	TGGT1_248480-t26_1-p1	transcript=TGGT1_248480-t26_1 | gene=TGGT1_248480 | organism=Toxoplasma_gondii_GT1 | gene_product=S4 RNA-binding domain-containing protein [Source:UniProtKB/TrEMBL;Acc:A0A125YWF5] | transcript_product=ribosomal protein RPS9 | location=TGGT1_chrXII:3816916-3818776(+) | protein_length=188 | sequence_SO=chromosome | SO=protein_coding_gene | is_pseudo=false	0	7.934	13	3	18	3	188	21.7	10.51	11.42	3	1.669	0.626	0.74	-0.68	0.263463	0.368284	0.851439	0.888356	12.7	12.67	0.74	0.86	-0.47	-0.79	-0.68	-0.45	1.85382e+06	607140	1.17343e+06	16.5	53.82	18.34	1.95195e+06	1.85382e+06	1.41296e+06	607140	590240	1.40819e+06	1.05228e+06	938316	2.05674e+06	1.17343e+06	1.15349e+06	1.57634e+06
FALSE	High	Master Protein	TGGT1_209290-t26_1-p1	transcript=TGGT1_209290-t26_1 | gene=TGGT1_209290 | organism=Toxoplasma_gondii_GT1 | gene_product=Ribosomal protein RPS28 [Source:UniProtKB/TrEMBL;Acc:S7UIH9] | transcript_product=ribosomal protein RPS28 | location=TGGT1_chrIb:1207027-1207383(-) | protein_length=118 | sequence_SO=chromosome | SO=protein_coding_gene | is_pseudo=false	0	7.92	21	2	2	2	118	13.2	10.76	2.1	2	1.347	0.934	0.43	-0.1	0.627931	0.869024	0.971725	0.987776	68.93	1.47	1.63	0.43	-0.47	-0.1	-0.11	0.64	237747	164467	181249	30.43	52.35	29.62	345594	237747	192392	146863	164467	357132	145230	181249	308133	148617	299562	262155
FALSE	High	Master Protein	TGGT1_261200-t26_1-p1	transcript=TGGT1_261200-t26_1 | gene=TGGT1_261200 | organism=Toxoplasma_gondii_GT1 | gene_product=Rab-GAP TBC domain-containing protein [Source:UniProtKB/TrEMBL;Acc:S7UYT0] | transcript_product=TBC domain-containing protein | location=TGGT1_chrVIIb:1812790-1818459(-) | protein_length=885 | sequence_SO=chromosome | SO=protein_coding_gene | is_pseudo=false	0	7.704	2	1	5	1	885	99.5	8.9	10.58	1	4.668	3.371	2.22	1.75	3.20624e-05	0.0003353	0.000891114	0.00450419	33.15	15.87	2.22	2.51	1.32	0.15	1.9	1.75	133685	60820.6	23406.1	49.62	45.52	23.94	136934	133685	44951	32518.2	87344.9	60820.6	30563.9	63285.5	13454.3	29335.5	23406.1	43841.6
FALSE	High	Master Protein	TGGT1_266060-t26_1-p1	transcript=TGGT1_266060-t26_1 | gene=TGGT1_266060 | organism=Toxoplasma_gondii_GT1 | gene_product=40S ribosomal protein SA [Source:UniProtKB/TrEMBL;Acc:A0A125YJG1] | transcript_product=ribosomal protein RPSA | location=TGGT1_chrIX:1148543-1150882(-) | protein_length=287 | sequence_SO=chromosome | SO=protein_coding_gene | is_pseudo=false	0	7.698	6	2	5	2	287	31.5	5.31	6.26	2	1.566	0.826	0.65	-0.28	0.352897	0.872019	0.938934	0.987776	46.57	26.72	1.04	0.65	-0.55	-0.59	-0.28	0.01	763884	418643	570682	29.12	56.62	32.99	1.15529e+06	763884	682931	387583	418643	989508	412415	481418	1.13381e+06	570682	651189	871479
FALSE	High	Master Protein	TGGT1_202810-t26_1-p1	transcript=TGGT1_202810-t26_1 | gene=TGGT1_202810 | organism=Toxoplasma_gondii_GT1 | gene_product=J domain-containing protein [Source:UniProtKB/TrEMBL;Acc:A0A125YRX3] | transcript_product=TIM14 protein | location=TGGT1_chrVIIa:2914136-2915434(+) | protein_length=140 | sequence_SO=chromosome | SO=protein_coding_gene | is_pseudo=false	0	7.675	18	3	19	3	140	15.6	10.18	15.4	3	0.886	1.046	-0.17	0.07	0.450826	0.639408	0.949873	0.973941	2.81	14.81	-0.17	0.22	-0.2	0.07	0.2	-0.57	925923	1.19734e+06	1.15691e+06	17.78	16.12	15.94	911045	925923	1.2335e+06	1.31234e+06	1.19734e+06	948858	783439	1.23657e+06	1.15691e+06	1.34293e+06	973803	1.52038e+06
FALSE	High	Master Protein	TGGT1_250955-t26_1-p1	transcript=TGGT1_250955-t26_1 | gene=TGGT1_250955 | organism=Toxoplasma_gondii_GT1 | gene_product=SUI1 domain-containing protein [Source:UniProtKB/TrEMBL;Acc:S7UG91] | transcript_product=KRUF family protein | location=AAQM03000395:2809-5775(+) | protein_length=632 | sequence_SO=contig | SO=protein_coding_gene | is_pseudo=false	0	7.653	6	3	13	3	632	67.5	10.9	6.06	3	1.062	0.623	0.09	-0.68	0.827656	0.360472	0.995562	0.888356	24.31	11.41	0.09	0.47	-0.17	-0.34	-0.79	-0.68	317113	97260.7	330489	14.66	19.18	7.68	317113	361800	269170	127475	89450.1	97260.7	252846	99694.2	118540	330489	296502	364037
FALSE	High	Master Protein	TGGT1_236890-t26_1-p1	transcript=TGGT1_236890-t26_1 | gene=TGGT1_236890 | organism=Toxoplasma_gondii_GT1 | gene_product=hypothetical protein | transcript_product=hypothetical protein | location=TGGT1_chrX:5457347-5458367(-) | protein_length=218 | sequence_SO=chromosome | SO=protein_coding_gene | is_pseudo=false	0	7.6	13	2	3	2	218	24.6	6.57	2.58	2	1.479	1.622	0.56	0.7	0.447169	0.1016	0.949873	0.537126	3.64	87.34	0.56	0.6	-0.16	0.7	1.5	-0.59	480458	463710	283889	25.04	63.14	5.13	539908	480458	322923	463710	799021	188932	269709	541089	251708	257497	283889	409514
FALSE	High	Master Protein	TGGT1_264440-t26_1-p1	transcript=TGGT1_264440-t26_1 | gene=TGGT1_264440 | organism=Toxoplasma_gondii_GT1 | gene_product=Signal recognition particle receptor beta subunit protein [Source:UniProtKB/TrEMBL;Acc:A0A125YKE8] | transcript_product=signal recognition particle receptor beta subunit protein | location=TGGT1_chrIX:2059841-2063738(-) | protein_length=347 | sequence_SO=chromosome | SO=protein_coding_gene | is_pseud…	0	7.523	13	3	11	3	347	37.4	7.15	0	3	1.134	1.155	0.18	0.21	0.980748	0.463561	0.998872	0.924827	11.13	6.57	0.07	0.34	0.18	0.27	0.21	0.06	433150	336517	361910	6.9	20.43	13.22	440863	387181	433150	434955	336517	293488	368507	298008	387695	329938	371007	390055
FALSE	High	Master Protein	TGGT1_315160-t26_1-p1	transcript=TGGT1_315160-t26_1 | gene=TGGT1_315160 | organism=Toxoplasma_gondii_GT1 | gene_product=hypothetical protein | transcript_product=hypothetical protein | location=TGGT1_chrXI:4475625-4484056(-) | protein_length=437 | sequence_SO=chromosome | SO=protein_coding_gene | is_pseudo=false	0	7.48	5	2	7	2	437	49.7	9.19	0	2	1.596	1.621	0.67	0.7	0.32381	0.101961	0.931128	0.537126	17.25	27.14	1.63	0.67	0.5	0.7	0.96	0.41	387721	304174	202992	41.3	32.78	24.93	634000	387721	284018	304174	481292	265938	159249	318910	192975	240554	297428	367365
FALSE	High	Master Protein	TGGT1_230430-t26_1-p1	transcript=TGGT1_230430-t26_1 | gene=TGGT1_230430 | organism=Toxoplasma_gondii_GT1 | gene_product=Putative vesicle-associated membrane protein [Source:UniProtKB/TrEMBL;Acc:A0A125YLL6] | transcript_product=putative vesicle-associated membrane protein | location=TGGT1_chrVIII:775206-779637(+) | protein_length=221 | sequence_SO=chromosome | SO=protein_coding_gene | is_pseudo=false	0	7.472	7	1	2	1	221	24.9	8.6	2.23	1	1.302	0.86	0.38	-0.22	0.701097	0.957373	0.971725	0.987776	118.28	37.66	1.23	0.38	-6.64	0.21	-0.22	-6.64	225579	128698	145510	13.4	33.54	36.52	205126	248071		101057	163898		86436.5	190547		88865.9		145510
FALSE	High	Master Protein	TGGT1_235130-t26_1-p1	transcript=TGGT1_235130-t26_1 | gene=TGGT1_235130 | organism=Toxoplasma_gondii_GT1 | gene_product=Transmembrane protein [Source:UniProtKB/TrEMBL;Acc:A0A125YYR0] | transcript_product=transmembrane protein | location=TGGT1_chrX:4523427-4527219(+) | protein_length=487 | sequence_SO=chromosome | SO=protein_coding_gene | is_pseudo=false	0	7.458	7	3	10	3	487	55.1	8.29	1.95	3	1.021	1.152	0.03	0.2	0.737913	0.468428	0.981806	0.927945	13.84	20.61	0.34	0.03	-0.11	0.39	0.2	-0.27	378307	399492	311090	20.46	23.53	34.55	415511	378307	274833	403021	399492	257319	404652	417165	441121	208311	233688	425976
FALSE	High	Master Protein	TGGT1_264820-t26_1-p1	transcript=TGGT1_264820-t26_1 | gene=TGGT1_264820 | organism=Toxoplasma_gondii_GT1 | gene_product=WD_REPEATS_REGION domain-containing protein [Source:UniProtKB/TrEMBL;Acc:S7UGS1] | transcript_product=RbAp48 | location=TGGT1_chrIX:1815450-1824951(-) | protein_length=914 | sequence_SO=chromosome | SO=protein_coding_gene | is_pseudo=false	0	7.453	2	1	4	1	914	98.4	8.4	5.03	1	0.505	0.01	-0.98	-6.64	0.0157822	1e-17	0.161693	2.015e-16	57.37	0	-0.28	-6.64	-0.98	-6.64	-0.02	-6.64	54502.8	61230.9	73621	15.12		22.81	60678.7		48955.6		61230.9			72556.7		73621	53274	75164.4
FALSE	High	Master Protein	TGGT1_249610-t26_1-p1	transcript=TGGT1_249610-t26_1 | gene=TGGT1_249610 | organism=Toxoplasma_gondii_GT1 | gene_product=MIF4G_like_2 domain-containing protein [Source:UniProtKB/TrEMBL;Acc:S7WG84] | transcript_product=hypothetical protein | location=TGGT1_chrXII:4618068-4627870(-) | protein_length=1208 | sequence_SO=chromosome | SO=protein_coding_gene | is_pseudo=false	0	7.426	2	2	4	2	1208	137.1	4.98	2.03	2	1.718	1.898	0.78	0.92	0.228903	0.0398395	0.795241	0.268715	99.64	22.86	1.76	0.78	-0.83	0.04	1.13	0.92	124682	148519	101974	74.04	55.72	32.57	333294	124682	83957.2	41761.5	158997	148519	32581.4	101974	66676.4	97516.1	72585.6	168906
FALSE	High	Master Protein	TGGT1_309820-t26_1-p1	transcript=TGGT1_309820-t26_1 | gene=TGGT1_309820 | organism=Toxoplasma_gondii_GT1 | gene_product=Ribosomal protein RPL11 [Source:UniProtKB/TrEMBL;Acc:A0A125YTH4] | transcript_product=ribosomal protein RPL11 | location=TGGT1_chrXI:792484-794108(+) | protein_length=175 | sequence_SO=chromosome | SO=protein_coding_gene | is_pseudo=false	0	7.305	9	3	10	3	175	20.2	10.07	18.21	3	0.865	0.602	-0.21	-0.73	0.410181	0.316213	0.949873	0.866898	23.86	1.55	0.32	-0.21	-0.42	-0.71	-0.75	-0.73	745940	541759	969440	39.49	14.02	8.31	1.35689e+06	695106	745940	541759	473965	627218	519220	564530	836228	1.13047e+06	969440	1.05755e+06
FALSE	High	Master Protein	TGGT1_254000-t26_1-p1	transcript=TGGT1_254000-t26_1 | gene=TGGT1_254000 | organism=Toxoplasma_gondii_GT1 | gene_product=hypothetical protein | transcript_product=hypothetical protein | location=TGGT1_chrIII:1373982-1375421(-) | protein_length=479 | sequence_SO=chromosome | SO=protein_coding_gene | is_pseudo=false	0	7.25	3	1	4	1	479	51.5	9.61	3.03	1	1.942	0.664	0.96	-0.59	0.117439	0.456399	0.568009	0.924827	40.75	77.68	1.69	0.96	0.49	-6.64	0.48	-0.59	245308	114358	111916	34.53	57.52	11.38	325122	245308	157589		176091	74267.5	91153.3	154198	91432.9	109683	103502	136988
FALSE	High	Master Protein	TGGT1_205460-t26_1-p1	transcript=TGGT1_205460-t26_1 | gene=TGGT1_205460 | organism=Toxoplasma_gondii_GT1 | gene_product=AN1 family Zinc finger domain-containing protein [Source:UniProtKB/TrEMBL;Acc:A0A125YQ64] | transcript_product=AN1 family Zinc finger domain-containing protein | location=TGGT1_chrVIIa:1303393-1305883(-) | protein_length=211 | sequence_SO=chromosome | SO=protein_coding_gene | is_pseudo=false	0	7.243	9	2	8	2	211	23.9	9.06	3.73	2	0.868	0.807	-0.2	-0.31	0.415544	0.824296	0.949873	0.987776	10.52	22.44	0.32	-0.2	-0.3	-0.07	-0.64	-0.31	285172	184273	297685	37.23	7.97	30.48	388236	285172	177128	184273	205516	176442	193676	297685	366893	209457	171457	339172
FALSE	High	Master Protein	TGGT1_231080-t26_1-p1	transcript=TGGT1_231080-t26_1 | gene=TGGT1_231080 | organism=Toxoplasma_gondii_GT1 | gene_product=Ribosomal protein RPL38 [Source:UniProtKB/TrEMBL;Acc:A0A125YR20] | transcript_product=ribosomal protein RPL38 | location=TGGT1_chrVIII:1225571-1225825(+) | protein_length=84 | sequence_SO=chromosome | SO=protein_coding_gene | is_pseudo=false	0	7.239	25	2	5	2	84	9.6	10.68	4.31	2	1.219	0.72	0.29	-0.47	0.849669	0.59807	0.995562	0.973941	18.03	45.42	0.45	0.29	-0.48	-0.47	-0.93	0.05	311410	162659	322763	18.11	63.88	31.27	311410	368117	255253	159348	162659	443198	227103	111437	435344	127060	322763	186248
FALSE	High	Master Protein	TGGT1_309740-t26_1-p1	transcript=TGGT1_309740-t26_1 | gene=TGGT1_309740 | organism=Toxoplasma_gondii_GT1 | gene_product=Small nuclear ribonucleoprotein Sm D3 [Source:UniProtKB/TrEMBL;Acc:A0A125YS34] | transcript_product=LSM domain-containing protein | location=TGGT1_chrXI:746275-747793(-) | protein_length=131 | sequence_SO=chromosome | SO=protein_coding_gene | is_pseudo=false	0	7.134	15	2	8	2	131	14.4	10.89	5.44	2	1.173	0.545	0.23	-0.87	0.94059	0.205029	0.995562	0.736079	34.07	20.06	0.23	0.53	-0.21	-0.66	-0.87	-1.08	587526	96401.4	445916	15.22	78.99	18.18	629804	465413	587526	295468	72734.2	96401.4	352529	274531	372545	445916	788827	1.08917e+06
FALSE	High	Master Protein	TGGT1_313560-t26_1-p1	transcript=TGGT1_313560-t26_1 | gene=TGGT1_313560 | organism=Toxoplasma_gondii_GT1 | gene_product=Ribosomal_L7Ae domain-containing protein [Source:UniProtKB/TrEMBL;Acc:A0A125YHF8] | transcript_product=putative 60S ribosomal protein L7a | location=TGGT1_chrXI:3438810-3439331(-) | protein_length=173 | sequence_SO=chromosome | SO=protein_coding_gene | is_pseudo=false	0	7.091	10	2	11	2	173	19.2	9.39	18.55	2	1.322	1.231	0.4	0.3	0.668558	0.366921	0.971725	0.888356	33.18	30.78	-0.02	0.4	0.69	0.3	-0.04	0.76	1.681e+06	1.58248e+06	1.59431e+06	7.62	19.1	13.61	1.49439e+06	1.7307e+06	1.681e+06	1.58248e+06	1.317e+06	1.93006e+06	2.12559e+06	1.65919e+06	2.28808e+06	1.59431e+06	1.70456e+06	1.27529e+06
FALSE	High	Master Protein	TGGT1_278220-t26_1-p1	transcript=TGGT1_278220-t26_1 | gene=TGGT1_278220 | organism=Toxoplasma_gondii_GT1 | gene_product=hypothetical protein | transcript_product=hypothetical protein | location=TGGT1_chrXII:6135922-6138975(+) | protein_length=598 | sequence_SO=chromosome | SO=protein_coding_gene | is_pseudo=false	0	7.086	5	2	3	2	598	67.4	10.07	2.29	2	1.449	0.777	0.54	-0.36	0.483122	0.746672	0.951523	0.976829	19.52	2.17	0.28	0.71	0.54	-0.38	-0.36	0.09	297494	70058	186116	10.66	25.86	5.37	248470	303465	297494	70058	68963.8	106093	147487	131464	179659	199484	260773	254935
FALSE	High	Master Protein	TGGT1_223485-t26_1-p1	transcript=TGGT1_223485-t26_1 | gene=TGGT1_223485 | organism=Toxoplasma_gondii_GT1 | gene_product=hypothetical protein | transcript_product=hypothetical protein | location=TGGT1_chrX:3690054-3691863(+) | protein_length=93 | sequence_SO=chromosome | SO=protein_coding_gene | is_pseudo=false	0	7.034	20	2	9	2	93	10.3	9.58	5.59	2	0.817	0.947	-0.29	-0.08	0.320813	0.83857	0.926794	0.987776	5.15	16.27	-0.29	-0.54	-0.24	-0.08	0.09	-0.51	430664	498285	519014	13.57	19.15	5.72	430664	349040	455952	555151	498285	376523	519014	470343	537128	433714	569880	521442
FALSE	High	Master Protein	TGGT1_248390-t26_1-p1	transcript=TGGT1_248390-t26_1 | gene=TGGT1_248390 | organism=Toxoplasma_gondii_GT1 | gene_product=KOW domain-containing protein [Source:UniProtKB/TrEMBL;Acc:A0A125YI79] | transcript_product=ribosomal protein RPL26 | location=TGGT1_chrXII:3763041-3764059(-) | protein_length=141 | sequence_SO=chromosome | SO=protein_coding_gene | is_pseudo=false	0	7.03	18	3	17	3	141	16.3	10.64	8.02	3	1.176	0.656	0.23	-0.61	0.932739	0.438184	0.995562	0.924827	37.35	1.71	0.62	0.23	-0.18	-1.06	-0.59	-0.61	1.34287e+06	711255	1.40042e+06	31.97	21.18	22.13	2.134e+06	1.21014e+06	1.34287e+06	627977	711255	938587	752472	881070	1.20667e+06	1.45951e+06	1.24614e+06	1.88674e+06
FALSE	High	Master Protein	TGGT1_236620-t26_1-p1	transcript=TGGT1_236620-t26_1 | gene=TGGT1_236620 | organism=Toxoplasma_gondii_GT1 | gene_product=Protein kinase domain-containing protein [Source:UniProtKB/TrEMBL;Acc:S7UQM1] | transcript_product=protein kinase (incomplete catalytic triad) | location=TGGT1_chrX:5341754-5348601(+) | protein_length=556 | sequence_SO=chromosome | SO=protein_coding_gene | is_pseudo=false	0	7.01	9	3	5	3	556	63.2	5.91	0	3	1.12	0.979	0.16	-0.03	0.951025	0.771638	0.995562	0.978242	7.94	41.62	0.05	0.16	0.24	0.62	-0.03	-0.39	91289.9	131658	127582	12.29	16.46	10.23	89468.6	91289.9	111016	157533	131658	113562	127582	119587	109668	87519.3	91417.6	213102
FALSE	High	Master Protein	TGGT1_232300-t26_1-p1	transcript=TGGT1_232300-t26_1 | gene=TGGT1_232300 | organism=Toxoplasma_gondii_GT1 | gene_product=KH type-2 domain-containing protein [Source:UniProtKB/TrEMBL;Acc:S7V3B5] | transcript_product=ribosomal protein RPS3 | location=TGGT1_chrVIII:1993673-1994649(-) | protein_length=255 | sequence_SO=chromosome | SO=protein_coding_gene | is_pseudo=false	0	6.895	13	3	5	3	255	28.6	9.45	2.02	3	1.04	1.264	0.06	0.34	0.779797	0.330796	0.995562	0.875727	35.63	1.65	0.06	0.37	-0.45	-6.64	0.35	0.34	285009	469752	302024	18.01	65.26	35.1	380375	285009	279472		285154	773852	183483	198128	462559	360099	289655	411393
FALSE	High	Master Protein	TGGT1_261950-t26_1-p1	transcript=TGGT1_261950-t26_1 | gene=TGGT1_261950 | organism=Toxoplasma_gondii_GT1 | gene_product=ATP synthase subunit beta [Source:UniProtKB/TrEMBL;Acc:A0A125YYY4] | transcript_product=ATP synthase beta subunit ATP-B | location=TGGT1_chrVIIb:1457013-1460114(-) | protein_length=560 | sequence_SO=chromosome | SO=protein_coding_gene | is_pseudo=false	0	6.887	5	2	3	2	560	59.9	6.87	3.65	2	0.816	1.3	-0.29	0.38	0.318312	0.294984	0.922875	0.84086	21.87	12.87	0.19	-0.29	-0.49	-0.41	0.38	0.5	79755.9	94467.5	94612.6	67.59	33.48	5.05	99122.2	15475	79755.9	80615.9	94467.5	149029	101021	98914.9	154291	74256	94612.6	86269.9
FALSE	High	Master Protein	TGGT1_201390-t26_1-p1	transcript=TGGT1_201390-t26_1 | gene=TGGT1_201390 | organism=Toxoplasma_gondii_GT1 | gene_product=hypothetical protein | transcript_product=hypothetical protein | location=TGGT1_chrVIIa:3811236-3811562(-) | protein_length=108 | sequence_SO=chromosome | SO=protein_coding_gene | is_pseudo=false	0	6.85	14	1	15	1	108	11.3	10.98	45.81	1	1.207	1.514	0.27	0.6	0.871848	0.146269	0.995562	0.634847	26.94	10.31	0.65	0.27	-0.02	0.6	0.7	0.23	801699	889435	694761	5.8	19.31	19.57	801699	838910	747191	772609	1124830	889435	711762	694761	756240	510399	867385	787857
FALSE	High	Master Protein	TGGT1_264900-t26_1-p1	transcript=TGGT1_264900-t26_1 | gene=TGGT1_264900 | organism=Toxoplasma_gondii_GT1 | gene_product=hypothetical protein | transcript_product=hypothetical protein | location=TGGT1_chrIX:1729306-1733861(-) | protein_length=887 | sequence_SO=chromosome | SO=protein_coding_gene | is_pseudo=false	0	6.833	5	2	5	2	887	94.8	6.49	0	2	0.839	0.446	-0.25	-1.16	0.35966	0.0714905	0.938934	0.405784	39.95	25.5	-0.6	0.38	-0.25	-0.89	-1.16	-1.72	125782	52466.3	119468	25.68	16.23	2.14	82093.2	138714	125782	63594	52466.3	46262.3	65167.1	85258.9	22913.5	119468	117150	172403
FALSE	High	Master Protein	TGGT1_261520-t26_1-p1	transcript=TGGT1_261520-t26_1 | gene=TGGT1_261520 | organism=Toxoplasma_gondii_GT1 | gene_product=OBG-type G domain-containing protein [Source:UniProtKB/TrEMBL;Acc:S7UYA0] | transcript_product=putative nucleolar GTP-binding protein 1 | location=TGGT1_chrVIIb:1646922-1654757(-) | protein_length=719 | sequence_SO=chromosome | SO=protein_coding_gene | is_pseudo=false	0	6.803	4	2	3	2	719	80.9	9.7	0	2	1.402	1.443	0.49	0.53	0.546972	0.185078	0.956387	0.690614	7.46	20.8	0.41	0.61	0.49	0.53	0.31	1.04	103290	145075	89806.5	52.56	22.71	23.68	37183.7	128348	103290	145075	100746	159688	89806.5	78410.1	122621	70424.9	75564.7	79013.4
FALSE	High	Master Protein	TGGT1_214210-t26_1-p1	transcript=TGGT1_214210-t26_1 | gene=TGGT1_214210 | organism=Toxoplasma_gondii_GT1 | gene_product=PUA domain-containing protein [Source:UniProtKB/TrEMBL;Acc:A0A125YRK0] | transcript_product=rRNA pseudouridine synthase | location=TGGT1_chrX:6002905-6008379(-) | protein_length=505 | sequence_SO=chromosome | SO=protein_coding_gene | is_pseudo=false	0	6.766	5	2	2	2	505	56.7	9	0	2	1.353	0.513	0.44	-0.96	0.618642	0.152367	0.971725	0.646358	20.43	19.36	0.44	1.22	0.22	-1.14	0.13	-0.96	81611.1	35165.6	55405.6	13.64	24.15	18.42	97077.4	74568.9	81611.1	24284.3	35165.6	39872.7	30062	32071.7	30951.1	53529.7	76588.9	100431
FALSE	High	Master Protein	TGGT1_251490-t26_1-p1	transcript=TGGT1_251490-t26_1 | gene=TGGT1_251490 | organism=Toxoplasma_gondii_GT1 | gene_product=ACR, COG2135 domain-containing protein [Source:UniProtKB/TrEMBL;Acc:S7V032] | transcript_product=ACR, COG2135 domain-containing protein | location=TGGT1_chrXII:5348097-5352442(-) | protein_length=466 | sequence_SO=chromosome | SO=protein_coding_gene | is_pseudo=false	0	6.747	11	3	8	3	466	50.2	9.25	0	3	1.355	0.862	0.44	-0.21	0.616324	0.962813	0.971725	0.987776	8	3.75	0.44	0.51	0.09	-0.18	-0.21	-1.32	393079	162344	280017	6.45	52.35	15.61	438451	392703	393079	172760	162344	51161.1	142473	233405	184991	280017	390363	670474
FALSE	High	Master Protein	TGGT1_268640-t26_1-p1	transcript=TGGT1_268640-t26_1 | gene=TGGT1_268640 | organism=Toxoplasma_gondii_GT1 | gene_product=WD_REPEATS_REGION domain-containing protein [Source:UniProtKB/TrEMBL;Acc:A0A125YTY9] | transcript_product=BING4CT (NUC141) domain-containing protein | location=TGGT1_chrVIII:6377589-6384854(-) | protein_length=568 | sequence_SO=chromosome | SO=protein_coding_gene | is_pseudo=false	0	6.742	5	3	4	3	568	64.5	9.52	1.67	3	0.767	0.358	-0.38	-1.48	0.237764	0.0169484	0.815481	0.143741	0.85	1.41	-0.38	-0.45	-0.37	-1.2	-1.48	-1.49	368864	171858	499055	5.68	35.49	3.27	388973	347138	368864	237837	171858	114008	270219	237062	284904	499055	481390	513967
FALSE	High	Master Protein	TGGT1_224970-t26_1-p1	transcript=TGGT1_224970-t26_1 | gene=TGGT1_224970 | organism=Toxoplasma_gondii_GT1 | gene_product=Nucleolar protein,nop52 protein [Source:UniProtKB/TrEMBL;Acc:S7UWG5] | transcript_product=nucleolar protein | location=TGGT1_chrX:2534848-2538890(+) | protein_length=1095 | sequence_SO=chromosome | SO=protein_coding_gene | is_pseudo=false	0	6.728	2	2	7	2	1095	117	9.48	5.7	2	0.675	0.437	-0.57	-1.19	0.119554	0.0631457	0.57343	0.382839	12.1	45.54	-0.04	-0.57	-0.68	-1.19	-0.24	-1.58	67399.3	109596	318999	83.99	25.94	19.93	67399.3	39647.8	200914	109596	139638	82315.1	170443	193778	183263	318999	223277	327150
FALSE	High	Master Protein	TGGT1_238040A-t26_1-p1	transcript=TGGT1_238040A-t26_1 | gene=TGGT1_238040A | organism=Toxoplasma_gondii_GT1 | gene_product=Protein disulfide-isomerase domain-containing protein [Source:UniProtKB/TrEMBL;Acc:S7W691] | transcript_product=protein disulfide-isomerase domain-containing protein | location=TGGT1_chrVI:19741-27980(-) | protein_length=1139 | sequence_SO=chromosome | SO=protein_coding_gene | is_pseudo=false	0	6.674	5	2	5	2	1139	126.1	8.68	2.23	2	1.175	1.293	0.23	0.37	0.936204	0.301265	0.995562	0.847631	26.27	12.09	0.47	0.23	-0.29	0.37	0.48	-0.26	124477	162015	130258	19.62	18.57	25.78	159231	124477	109094	162015	173851	120131	35011.9	130258	125051	116200	143600	139527
FALSE	High	Master Protein	TGGT1_217510-t26_1-p1	transcript=TGGT1_217510-t26_1 | gene=TGGT1_217510 | organism=Toxoplasma_gondii_GT1 | gene_product=hypothetical protein | transcript_product=hypothetical protein | location=TGGT1_chrXII:1824650-1826480(+) | protein_length=380 | sequence_SO=chromosome | SO=protein_coding_gene | is_pseudo=false	0	6.618	7	1	2	1	380	42.1	8.79	3.38	1
FALSE	High	Master Protein	TGGT1_267710-t26_1-p1	transcript=TGGT1_267710-t26_1 | gene=TGGT1_267710 | organism=Toxoplasma_gondii_GT1 | gene_product=CPSF_A domain-containing protein [Source:UniProtKB/TrEMBL;Acc:S7UHL5] | transcript_product=CPSF A subunit region protein | location=TGGT1_chrIX:261380-276054(+) | protein_length=2072 | sequence_SO=chromosome | SO=protein_coding_gene | is_pseudo=false	0	6.555	1	2	3	2	2072	222.9	6.68	2.06	2	0.747	1.051	-0.42	0.07	0.208322	0.631545	0.783164	0.973941	11.34	19.51	-0.16	-0.42	-0.53	0.25	-0.2	0.07	94590.8	120986	110012	4.92	17.93	14.45	94590.8	102170	93393.5	120986	95649.7	137721	97395.5	100675	129614	96928.6	110012	120329
FALSE	High	Master Protein	TGGT1_310780-t26_1-p1	transcript=TGGT1_310780-t26_1 | gene=TGGT1_310780 | organism=Toxoplasma_gondii_GT1 | gene_product=Dense granule protein GRA4 [Source:UniProtKB/TrEMBL;Acc:S7UT91] | transcript_product=dense granule protein GRA4 | location=TGGT1_chrXI:1552761-1553798(-) | protein_length=345 | sequence_SO=chromosome | SO=protein_coding_gene | is_pseudo=false	0	6.515	6	1	4	1	345	36.3	7.56	2.53	1	1.382	1.012	0.47	0.02	0.575535	0.703163	0.971725	0.973941	2.74	26.03	0.47	-0.15	0.49	0.35	-0.26	0.02	333457	307940	316773	20.17	5.99	17.36	333457	308508	445811	307940	284748	320723	173041	160338	316773	241322	515251	504796
FALSE	High	Master Protein	TGGT1_286000-t26_1-p1	transcript=TGGT1_286000-t26_1 | gene=TGGT1_286000 | organism=Toxoplasma_gondii_GT1 | gene_product=hypothetical protein | transcript_product=hypothetical protein | location=TGGT1_chrV:1920796-1923579(+) | protein_length=736 | sequence_SO=chromosome | SO=protein_coding_gene | is_pseudo=false	0	6.488	2	1	2	1	736	80.4	9.22	3.52	1	3.621	1.016	1.86	0.02	0.000655816	0.696895	0.0128924	0.973941	19.39	146.8	2.03	1.86	-6.64	0.02	1.78	-6.64	90559.3	43870.2	24097.5	1.56	81.63	5.18	91561.5	89568.2		22714.1	84731		29446.2	43494.3	30003.2	17765.8	21568
FALSE	High	Master Protein	TGGT1_310490-t26_1-p1	transcript=TGGT1_310490-t26_1 | gene=TGGT1_310490 | organism=Toxoplasma_gondii_GT1 | gene_product=Ribosomal_L18e/L15P domain-containing protein [Source:UniProtKB/TrEMBL;Acc:A0A125YTM1] | transcript_product=ribosomal protein RPL27A | location=TGGT1_chrXI:1345590-1346369(-) | protein_length=147 | sequence_SO=chromosome | SO=protein_coding_gene | is_pseudo=false	0	6.488	14	2	11	2	147	16.3	10.45	3.36	2	1.199	0.597	0.26	-0.74	0.888324	0.304704	0.995562	0.849797	29.08	16.64	0.76	0.26	-0.05	-0.98	-0.74	-0.57	1.05396e+06	450663	880308	28.02	32.15	19.09	1.49403e+06	872754	1.05396e+06	450663	421604	733067	476017	496235	988139	880308	1.16761e+06	1.40619e+06
FALSE	High	Master Protein	TGGT1_255670-t26_1-p1	transcript=TGGT1_255670-t26_1 | gene=TGGT1_255670 | organism=Toxoplasma_gondii_GT1 | gene_product=Methyltransferase domain-containing protein [Source:UniProtKB/TrEMBL;Acc:S7WI97] | transcript_product=methyltransferase domain-containing protein | location=TGGT1_chrVIIb:4651040-4656754(+) | protein_length=219 | sequence_SO=chromosome | SO=protein_coding_gene | is_pseudo=false	0	6.473	11	2	8	2	219	25.2	9.57	1.73	2	0.903	1.087	-0.15	0.12	0.484497	0.567794	0.951523	0.962677	2.99	25.64	-0.15	0.19	-0.18	0.35	0.12	-0.46	372321	175575	336507	41.4	55.39	13.02	372321	412901	167601	374273	175575	137930	152400	411674	189445	292402	287749	457299
FALSE	High	Master Protein	TGGT1_278960-t26_1-p1	transcript=TGGT1_278960-t26_1 | gene=TGGT1_278960 | organism=Toxoplasma_gondii_GT1 | gene_product=hypothetical protein | transcript_product=hypothetical protein | location=TGGT1_chrXII:5640758-5643155(-) | protein_length=537 | sequence_SO=chromosome | SO=protein_coding_gene | is_pseudo=false	0	6.443	3	2	6	2	537	58.3	8.66	12.22	2	1.441	0.794	0.53	-0.33	0.494288	0.790935	0.951523	0.987776	4.98	35.64	0.57	0.53	0.11	-0.98	0.06	-0.33	503537	346979	396359	4.73	29.77	25.24	499881	543805	503537	194762	346979	348539	255787	300952	502818	440347	423613	515436
FALSE	High	Master Protein	TGGT1_235160-t26_1-p1	transcript=TGGT1_235160-t26_1 | gene=TGGT1_235160 | organism=Toxoplasma_gondii_GT1 | gene_product=hypothetical protein | transcript_product=hypothetical protein | location=TGGT1_chrX:4553113-4566152(-) | protein_length=1545 | sequence_SO=chromosome | SO=protein_coding_gene | is_pseudo=false	0	6.441	1	1	1	1	1545	168	6.28	2.34	1	100	100	6.64	6.64	1e-17	1e-17	4.24211e-16	2.015e-16	0	0	6.64	6.64			6.64		224629	42430.5		22.77			264234	190960			42430.5
FALSE	High	Master Protein	TGGT1_209690-t26_1-p1	transcript=TGGT1_209690-t26_1 | gene=TGGT1_209690 | organism=Toxoplasma_gondii_GT1 | gene_product=Small nuclear ribonucleoprotein [Source:UniProtKB/TrEMBL;Acc:A0A125YM13] | transcript_product=small nuclear ribonucleoprotein | location=TGGT1_chrIb:1418742-1420074(+) | protein_length=233 | sequence_SO=chromosome | SO=protein_coding_gene | is_pseudo=false	0	6.435	15	3	5	3	233	24.9	9.73	0	3	0.931	0.917	-0.1	-0.13	0.543233	0.907181	0.956387	0.987776	36.79	4.96	0.94	-0.1	-0.42	-0.13	0.07	-0.17	482947	490905	603851	29.15	7.71	13.14	720599	421656	482947	490905	550084	476496	339864	489359	514769	517791	603851	679967
FALSE	High	Master Protein	TGGT1_251540-t26_1-p1	transcript=TGGT1_251540-t26_1 | gene=TGGT1_251540 | organism=Toxoplasma_gondii_GT1 | gene_product=Dense granule protein GRA9 [Source:UniProtKB/TrEMBL;Acc:A0A125YWK4] | transcript_product=dense granule protein GRA9 | location=TGGT1_chrXII:5372511-5374084(+) | protein_length=318 | sequence_SO=chromosome | SO=protein_coding_gene | is_pseudo=false	0	6.427	11	2	6	2	318	35.3	5.39	0	2	1.437	1.448	0.52	0.53	0.499409	0.182049	0.951523	0.685661	43.29	0.58	0.02	0.52	0.92	0.53	0.53	0.83	275965	338451	195238	26.47	22.5	32.31	193461	334669	275965	293722	338451	451448	205081	268328	53361	184001	239133	381107
FALSE	High	Master Protein	TGGT1_228190-t26_1-p1	transcript=TGGT1_228190-t26_1 | gene=TGGT1_228190 | organism=Toxoplasma_gondii_GT1 | gene_product=JAB_MPN domain-containing protein [Source:UniProtKB/TrEMBL;Acc:A0A125YGD9] | transcript_product=putative eukaryotic initiation factor-3, subunit 5 | location=TGGT1_chrX:414529-416813(+) | protein_length=346 | sequence_SO=chromosome | SO=protein_coding_gene | is_pseudo=false	0	6.33	6	2	3	2	346	38	6.52	0	2	1.719	0.49	0.78	-1.03	0.228359	0.12089	0.795241	0.590527	90.96	18.89	1.48	0.78	-0.59	-1.03	-1.2	-0.12	214167	52808.9	123705	55.53	63.25	18.6	368380	214167	112799	52098.8	52808.9	142968	65629.2	100092	153233	106227	129968	146282
FALSE	High	Master Protein	TGGT1_244380-t26_1-p1	transcript=TGGT1_244380-t26_1 | gene=TGGT1_244380 | organism=Toxoplasma_gondii_GT1 | gene_product=Cactin [Source:UniProtKB/TrEMBL;Acc:S7VMZ6] | transcript_product=cactin | location=TGGT1_chrVI:3137734-3142670(-) | protein_length=688 | sequence_SO=chromosome | SO=protein_coding_gene | is_pseudo=false	0	6.307	4	2	2	2	688	79.5	6.16	0	2	0.863	1.025	-0.21	0.04	0.405017	0.678743	0.949873	0.973941	5.36	18.37	1.04	-0.21	-0.26	0.04	-0.15	0.27	108495	91873.8	104709	32.15	29.54	14.41	163905	108495	89251.6	83125.6	91873.8	140838	87037.1	104709	140404	97818.1	107099	116437
FALSE	High	Master Protein	TGGT1_313700-t26_1-p1	transcript=TGGT1_313700-t26_1 | gene=TGGT1_313700 | organism=Toxoplasma_gondii_GT1 | gene_product=hypothetical protein | transcript_product=hypothetical protein | location=TGGT1_chrXI:3587235-3591120(+) | protein_length=585 | sequence_SO=chromosome | SO=protein_coding_gene | is_pseudo=false	0	6.303	5	2	2	2	585	62.9	8.22	0	2	0.979	1.343	-0.03	0.43	0.645687	0.256996	0.971725	0.812006	11.83	12.59	0.09	-0.03	-0.2	0.43	0.15	0.54	118530	142064	114669	22.02	2.38	11.88	136265	118530	86787.1	142064	136760	142951	117157	150273	179125	102514	122572	96756.3
FALSE	High	Master Protein	TGGT1_227560-t26_1-p1	transcript=TGGT1_227560-t26_1 | gene=TGGT1_227560 | organism=Toxoplasma_gondii_GT1 | gene_product=TFIIS N-terminal domain-containing protein [Source:UniProtKB/TrEMBL;Acc:S7W5Z1] | transcript_product=putative IWS1 transcription factor | location=TGGT1_chrX:825559-830619(+) | protein_length=476 | sequence_SO=chromosome | SO=protein_coding_gene | is_pseudo=false	0	6.291	6	2	3	2	476	54.3	5.92	2.01	2	1.224	1.593	0.29	0.67	0.839855	0.111914	0.995562	0.556809	59.93	18.72	0.29	0.78	-0.66	0.48	0.92	0.67	86030.8	144316	88425.5	30.24	29.07	18.06	89338.7	86030.8	48670.1	142830	144316	230427	162426	162968	165290	49747.8	47806.4	77047.2
FALSE	High	Master Protein	TGGT1_311100-t26_1-p1	transcript=TGGT1_311100-t26_1 | gene=TGGT1_311100 | organism=Toxoplasma_gondii_GT1 | gene_product=Zinc finger (CCCH type) motif-containing protein [Source:UniProtKB/TrEMBL;Acc:S7UU40] | transcript_product=zinc finger (CCCH type) motif-containing protein | location=TGGT1_chrXI:1771325-1774934(+) | protein_length=919 | sequence_SO=chromosome | SO=protein_coding_gene | is_pseudo=false	0	6.281	2	2	4	2	919	98.7	8.6	0	2	0.594	0.297	-0.75	-1.75	0.0531783	0.0038847	0.363235	0.0406633	13.93	113.57	-0.61	-0.75	-1.3	-1.75	-6.64	0.34	83338.2	86806.1	168145	31.94	38.61	12.63	135868	78790.6	83338.2	65600.2		114867	141772		57942.4	165149	102934	182670
FALSE	High	Master Protein	TGGT1_249250-t26_1-p1	transcript=TGGT1_249250-t26_1 | gene=TGGT1_249250 | organism=Toxoplasma_gondii_GT1 | gene_product=Ribosomal protein RPL35A [Source:UniProtKB/TrEMBL;Acc:A0A125YPQ6] | transcript_product=ribosomal protein RPL35A | location=TGGT1_chrXII:4329155-4330881(+) | protein_length=112 | sequence_SO=chromosome | SO=protein_coding_gene | is_pseudo=false	0	6.253	23	2	3	2	112	12.8	10.95	0	2	1.078	0.732	0.11	-0.45	0.861239	0.629794	0.995562	0.973941	17.55	10.27	0.6	0.11	-0.07	-0.73	-0.45	-0.35	665456	272150	449625	17.16	27.73	13.23	768430	542572	665456	272150	271375	427149	365726	297653	511581	449625	526026	835468
FALSE	High	Master Protein	TGGT1_228470-t26_1-p1	transcript=TGGT1_228470-t26_1 | gene=TGGT1_228470 | organism=Toxoplasma_gondii_GT1 | gene_product=Ribosomal protein L15 [Source:UniProtKB/TrEMBL;Acc:A0A125YX54] | transcript_product=ribosomal protein RPL15 | location=TGGT1_chrX:205832-208062(+) | protein_length=205 | sequence_SO=chromosome | SO=protein_coding_gene | is_pseudo=false	0	6.25	11	2	10	2	205	24.3	11.18	9.52	2	0.92	0.849	-0.12	-0.24	0.520698	0.928666	0.951523	0.987776	22.1	3.9	0.18	-0.12	-0.32	-0.32	-0.24	-0.2	368980	234582	276440	31.69	14.64	10.92	502669	368980	263430	217510	234582	286716	271371	217321	315214	226134	276440	329000
FALSE	High	Master Protein	TGGT1_267350-t26_1-p1	transcript=TGGT1_267350-t26_1 | gene=TGGT1_267350 | organism=Toxoplasma_gondii_GT1 | gene_product=Small nuclear ribonucleoprotein Sm D1 [Source:UniProtKB/TrEMBL;Acc:A0A125YGA0] | transcript_product=LSM domain-containing protein | location=TGGT1_chrIX:540789-541154(-) | protein_length=121 | sequence_SO=chromosome | SO=protein_coding_gene | is_pseudo=false	0	6.245	11	1	7	1	121	13.5	11.68	2.73	1	1.3	0.423	0.38	-1.24	0.704902	0.0516841	0.971725	0.333259	18.83	10.48	0.38	0.55	-0.34	-1.34	-1.14	-1.24	210249	82757.1	205992	25.57	14.71	19.98	272942	210249	163126	82757.1	65314.7	87103.4	112353	108660	158801	210015	189641	267206
FALSE	High	Master Protein	TGGT1_211030-t26_1-p1	transcript=TGGT1_211030-t26_1 | gene=TGGT1_211030 | organism=Toxoplasma_gondii_GT1 | gene_product=hypothetical protein | transcript_product=hypothetical protein | location=TGGT1_chrIV:1889471-1891938(-) | protein_length=191 | sequence_SO=chromosome | SO=protein_coding_gene | is_pseudo=false	0	6.242	15	2	3	2	191	22.2	5.82	0	2	0.975	0.909	-0.04	-0.14	0.637416	0.924988	0.971725	0.987776	33.9	1.78	0.34	-0.04	-0.5	-0.14	-0.4	-0.12	193782	150753	152344	12.42	28.48	22.66	224181	193782	175527	145042	150753	235045	152344	136536	207972	78998.2	157372	264874
FALSE	High	Master Protein	TGGT1_201400-t26_1-p1	transcript=TGGT1_201400-t26_1 | gene=TGGT1_201400 | organism=Toxoplasma_gondii_GT1 | gene_product=Sin3-associated polypeptide SAP18 [Source:UniProtKB/TrEMBL;Acc:S7UV76] | transcript_product=Sin3-associated polypeptide SAP18 | location=TGGT1_chrVIIa:3801972-3807611(-) | protein_length=868 | sequence_SO=chromosome | SO=protein_coding_gene | is_pseudo=false	0	6.219	3	2	2	2	868	97.2	10.54	2.26	2	3.034	0.439	1.6	-1.19	0.00391856	0.0648769	0.0544545	0.387665	0.17	38.02	1.6	1.6	-1.29	-1.52	0.41	-1.19	121356	23372.3	62841.6	58.36	51.22	37.11	181558	121356	46066.4	21250.8	50327.9	23372.3	28113.4	52926.7		69798	42674.8	110983
FALSE	High	Master Protein	TGGT1_250800-t26_1-p1	transcript=TGGT1_250800-t26_1 | gene=TGGT1_250800 | organism=Toxoplasma_gondii_GT1 | gene_product=AP2 domain transcription factor AP2XII-8 [Source:UniProtKB/TrEMBL;Acc:S7W8S6] | transcript_product=AP2 domain transcription factor AP2XII-8 | location=TGGT1_chrXII:5155557-5161328(-) | protein_length=1679 | sequence_SO=chromosome | SO=protein_coding_gene | is_pseudo=false	0	6.213	2	2	10	2	1679	165.5	7.27	2.56	2	1.086	0.849	0.12	-0.24	0.879246	0.930071	0.995562	0.987776	33.32	4.29	0.41	-0.51	0.12	-6.64	-0.19	-0.24	143005	196833	232150	53.48	4.66	5.88	323469	143005	133666		190452	203427		216780	238631	243855	219887	232150
FALSE	High	Master Protein	TGGT1_295070-t26_1-p1	transcript=TGGT1_295070-t26_1 | gene=TGGT1_295070 | organism=Toxoplasma_gondii_GT1 | gene_product=Helicase associated domain (Ha2) protein [Source:UniProtKB/TrEMBL;Acc:A0A125YVK4] | transcript_product=helicase associated domain (ha2) protein | location=TGGT1_chrIa:1358642-1370732(-) | protein_length=1603 | sequence_SO=chromosome | SO=protein_coding_gene | is_pseudo=false	0	6.206	2	3	5	3	1603	175.1	8.19	0	3	1.235	0.526	0.3	-0.93	0.820407	0.173061	0.995562	0.680425	33.01	13.77	0.59	0.3	-0.63	-1.05	-0.93	-0.54	206992	63174.7	122866	27.23	12.4	11.34	206992	226186	129663	63174.7	63939.5	50834.3	42290.1	89882.4	89864.3	144412	236762	283899
FALSE	High	Master Protein	TGGT1_247550-t26_1-p1	transcript=TGGT1_247550-t26_1 | gene=TGGT1_247550 | organism=Toxoplasma_gondii_GT1 | gene_product=Heat shock protein HSP60 [Source:UniProtKB/TrEMBL;Acc:A0A125YNH1] | transcript_product=heat shock protein HSP60 | location=TGGT1_chrXII:3342084-3346052(-) | protein_length=575 | sequence_SO=chromosome | SO=protein_coding_gene | is_pseudo=false	0	6.145	2	1	2	1	575	60.9	5.97	2.31	1	1.387	0.809	0.47	-0.31	0.567694	0.827108	0.967361	0.987776	70.68	42.35	2.77	0.47	-0.46	-0.67	0.23	-0.31	55371.6	43252.2	39916.3	85.43	45.91	33.24	183139	55371.6	38832.9	16886.2	46918.7	43252.2	21599.4	102786	89345.9	26850.6	39916.3	50847.7
FALSE	High	Master Protein	TGGT1_264690-t26_1-p1	transcript=TGGT1_264690-t26_1 | gene=TGGT1_264690 | organism=Toxoplasma_gondii_GT1 | gene_product=Putative cyclin 4 [Source:UniProtKB/TrEMBL;Acc:S7UFU0] | transcript_product=putative cyclin 4 | location=TGGT1_chrIX:1927814-1932076(-) | protein_length=634 | sequence_SO=chromosome | SO=protein_coding_gene | is_pseudo=false	0	6.113	5	2	3	2	634	69.9	9.16	1.77	2	0.01	0.01	-6.64	-6.64	1e-17	1e-17	4.24211e-16	2.015e-16	0	0		-6.64	-6.64		-6.64	-6.64			100429			22.02
FALSE	High	Master Protein	TGGT1_230940-t26_1-p1	transcript=TGGT1_230940-t26_1 | gene=TGGT1_230940 | organism=Toxoplasma_gondii_GT1 | gene_product=hypothetical protein | transcript_product=hypothetical protein | location=TGGT1_chrVIII:1112065-1119747(+) | protein_length=1523 | sequence_SO=chromosome | SO=protein_coding_gene | is_pseudo=false	0	6.107	1	2	4	2	1523	155.1	9.44	2.82	2	0.877	0.375	-0.19	-1.42	0.432294	0.0233848	0.949873	0.181123	30.79	29.91	-0.71	-0.19	0.15	-1.68	-0.06	-1.42	175891	89791.5	183944	29.85	27.15	41.65	175891	108994	203504	89791.5	118990	68945.2	288796	93563.1	96267.2		124335	183944
FALSE	High	Master Protein	TGGT1_290910-t26_1-p1	transcript=TGGT1_290910-t26_1 | gene=TGGT1_290910 | organism=Toxoplasma_gondii_GT1 | gene_product=hypothetical protein | transcript_product=hypothetical protein | location=TGGT1_chrIX:3738106-3743566(+) | protein_length=961 | sequence_SO=chromosome | SO=protein_coding_gene | is_pseudo=false	0	6.079	3	3	6	3	961	106	9.41	1.8	3	0.918	0.657	-0.12	-0.61	0.516312	0.439256	0.951523	0.924827	28.58	5.02	0.19	-0.12	-0.63	-0.11	-0.61	-0.66	103886	70859.4	128360	23.94	14.55	20.82	103886	117805	72075.8	84830.9	63915.7	70859.4	112022	79992.5	102332	86636.1	167089	128360
FALSE	High	Master Protein	TGGT1_289530-t26_1-p1	transcript=TGGT1_289530-t26_1 | gene=TGGT1_289530 | organism=Toxoplasma_gondii_GT1 | gene_product=Ribosomal_L19e domain-containing protein [Source:UniProtKB/TrEMBL;Acc:A0A125YMW0] | transcript_product=ribosomal protein RPL19 | location=TGGT1_chrIX:3095967-3098521(-) | protein_length=187 | sequence_SO=chromosome | SO=protein_coding_gene | is_pseudo=false	0	6.074	10	2	19	2	187	22.1	11.15	14.25	2	1.242	0.77	0.31	-0.38	0.806125	0.728684	0.995562	0.976829	29.47	28.98	0.73	0.31	-0.01	-1.2	-0.06	-0.38	1.47132e+06	820712	1.22939e+06	31.95	32.25	23.94	2.03644e+06	1.06661e+06	1.47132e+06	536146	820712	1.05347e+06	792725	752063	1.40066e+06	1.22939e+06	1.57375e+06	1.54697e+06
FALSE	High	Master Protein	TGGT1_315130-t26_1-p1	transcript=TGGT1_315130-t26_1 | gene=TGGT1_315130 | organism=Toxoplasma_gondii_GT1 | gene_product=L-isoaspartyl protein carboxyl methyltransferase family protein [Source:UniProtKB/TrEMBL;Acc:S7VV27] | transcript_product=L-isoaspartyl protein carboxyl methyltransferase family protein | location=TGGT1_chrXI:4454253-4457653(-) | protein_length=539 | sequence_SO=chromosome | SO=protein_coding_gene | …	0	6.071	9	2	2	2	539	58.5	8.92	0	2	1.57	0.827	0.65	-0.27	0.348664	0.875401	0.938934	0.987776	70.89	11.7	-0.29	0.65	1.25	-0.15	-2.04	-0.27	232743	98953.4	124289	36.43	57.76	25.22	136584	232743	297537	107402	26027.7	98953.4	89590.4	47233.1	101918	124289	206776	158125
FALSE	High	Master Protein	TGGT1_223410-t26_1-p1	transcript=TGGT1_223410-t26_1 | gene=TGGT1_223410 | organism=Toxoplasma_gondii_GT1 | gene_product=Putative eukaryotic initiation factor-4E [Source:UniProtKB/TrEMBL;Acc:A0A125YS61] | transcript_product=putative eukaryotic initiation factor-4E | location=TGGT1_chrX:3763701-3766447(+) | protein_length=225 | sequence_SO=chromosome | SO=protein_coding_gene | is_pseudo=false	0	6.042	9	2	5	2	225	26	6.24	9.51	2	1.214	0.967	0.28	-0.05	0.858933	0.795092	0.995562	0.987776	12.16	20.99	0.28	0.39	0	-0.05	0.38	-0.24	304076	238231	237341	7.84	14.06	6.14	304076	344654	299668	238231	300241	236511	252182	317398	237341	193606	222998	405576
FALSE	High	Master Protein	TGGT1_312110-t26_1-p1	transcript=TGGT1_312110-t26_1 | gene=TGGT1_312110 | organism=Toxoplasma_gondii_GT1 | gene_product=Thioredoxin domain-containing protein [Source:UniProtKB/TrEMBL;Acc:S7UTI6] | transcript_product=apicoplast-associated thioredoxin family protein Atrx1 | location=TGGT1_chrXI:2396639-2404968(-) | protein_length=790 | sequence_SO=chromosome | SO=protein_coding_gene | is_pseudo=false	0	6.033	6	2	3	2	790	86.9	7.81	0	2	1.086	1.41	0.12	0.5	0.879839	0.206394	0.995562	0.736079	19.25	5.5	0.3	0.12	-0.31	0.55	0.19	0.5	156909	90869	100436	22.82	36.07	11.31	161355	103677	156909	65299.3	90869	134403	97261.2	91523.1	114432	100436	107859	151606
FALSE	High	Master Protein	TGGT1_321680-t26_1-p1	transcript=TGGT1_321680-t26_1 | gene=TGGT1_321680 | organism=Toxoplasma_gondii_GT1 | gene_product=HABP4_PAI-RBP1 domain-containing protein [Source:UniProtKB/TrEMBL;Acc:A0A125YT80] | transcript_product=hypothetical protein | location=TGGT1_chrIb:1645852-1649258(-) | protein_length=372 | sequence_SO=chromosome | SO=protein_coding_gene | is_pseudo=false	0	5.943	6	2	6	2	372	40.7	6.16	1.66	2	0.923	0.331	-0.11	-1.6	0.527767	0.00929793	0.951633	0.0892159	47.17	26.59	0.92	-0.51	-0.11	-1.83	-1.6	-0.65	393768	86731.1	311587	46.05	69.13	12.79	564717	206995	393768	76205.1	86731.1	243396	34391.8	104905	305461	311774	281143	361739
FALSE	High	Master Protein	TGGT1_264010-t26_1-p1	transcript=TGGT1_264010-t26_1 | gene=TGGT1_264010 | organism=Toxoplasma_gondii_GT1 | gene_product=SNRNP27 domain-containing protein [Source:UniProtKB/TrEMBL;Acc:A0A125YG89] | transcript_product=hypothetical protein | location=TGGT1_chrVIIb:209705-211088(-) | protein_length=231 | sequence_SO=chromosome | SO=protein_coding_gene | is_pseudo=false	0	5.9	4	1	6	1	231	26.5	10.29	4.81	1	0.902	0.707	-0.15	-0.5	0.483976	0.564589	0.951523	0.962677	30.99	17.21	0.19	-0.15	-0.92	-0.5	-0.32	-2.52	158698	139911	263817	40.02	53.98	26.06	300941	157840	158698	186513	139911	52291.5	180625	145513	118285	292235	174932	383485
FALSE	High	Master Protein	TGGT1_273060-t26_1-p1	transcript=TGGT1_273060-t26_1 | gene=TGGT1_273060 | organism=Toxoplasma_gondii_GT1 | gene_product=Putative ribosomal protein S17 [Source:UniProtKB/TrEMBL;Acc:A0A125YU94] | transcript_product=putative ribosomal protein S17 | location=TGGT1_chrVIII:3687840-3688616(+) | protein_length=116 | sequence_SO=chromosome | SO=protein_coding_gene | is_pseudo=false	0	5.879	16	2	9	2	116	14	10.08	4	2	1.185	1.192	0.24	0.25	0.916545	0.41484	0.995562	0.920068	6.9	12.8	0.18	0.24	0.37	0.25	-0.15	0.37	399069	408217	313741	3	22.18	14.54	416162	399069	392854	438818	281461	408217	372160	353864	461177	464304	279633	313741
FALSE	High	Master Protein	TGGT1_223880-t26_1-p1	transcript=TGGT1_223880-t26_1 | gene=TGGT1_223880 | organism=Toxoplasma_gondii_GT1 | gene_product=RING-type domain-containing protein [Source:UniProtKB/TrEMBL;Acc:S7UVV4] | transcript_product=zinc finger, C3HC4 type (RING finger) domain-containing protein | location=TGGT1_chrX:3392353-3413350(-) | protein_length=3893 | sequence_SO=chromosome | SO=protein_coding_gene | is_pseudo=false	0	5.824	0	1	1	1	3893	407.1	7.64	2.3	1	0.544	0.814	-0.88	-0.3	0.0280153	0.840928	0.240217	0.987776	4.72	29.69	-0.88	-0.67	-0.92	-0.3	0.03	-0.86	42373.3	63427.9	68976.3	21.51	39.66	17.76	42373.3	43217.8	28631.7	63427.9	70200.4	29843.8	77930.3	79315.9	54332.6	59477.3	38274.2	45264.1
FALSE	High	Master Protein	TGGT1_268590-t26_1-p1	transcript=TGGT1_268590-t26_1 | gene=TGGT1_268590 | organism=Toxoplasma_gondii_GT1 | gene_product=RHOMBOID-like protein [Source:UniProtKB/TrEMBL;Acc:S7WDE0] | transcript_product=rhomboid protease ROM4 | location=TGGT1_chrVIII:6404350-6409050(-) | protein_length=665 | sequence_SO=chromosome | SO=protein_coding_gene | is_pseudo=false	0	5.823	3	2	13	2	665	72.3	8.97	15.76	2	0.492	0.344	-1.02	-1.54	0.012647	0.0125667	0.13775	0.113807	10.44	25.33	-0.02	-1.02	-1.12	-1.54	-1.27	-2.26	489118	260710	820508	37.02	17.96	19.03	776720	383443	489118	260710	317329	222073	256985	357581	344366	1.04766e+06	937768	1.0871e+06
FALSE	High	Master Protein	TGGT1_275750-t26_1-p1	transcript=TGGT1_275750-t26_1 | gene=TGGT1_275750 | organism=Toxoplasma_gondii_GT1 | gene_product=Small nuclear ribonucleoprotein E [Source:UniProtKB/TrEMBL;Acc:A0A125YK47] | transcript_product=putative small nuclear ribonucleoprotein E | location=TGGT1_chrIII:236922-238994(-) | protein_length=91 | sequence_SO=chromosome | SO=protein_coding_gene | is_pseudo=false	0	5.798	25	2	5	2	91	10.8	9.7	0	2	1.564	1.037	0.65	0.05	0.354227	0.655687	0.938934	0.973941	9.28	35.05	-0.25	0.65	0.73	0.05	-0.73	0.36	925522	706700	674242	41.54	36.69	20.27	576313	925522	1.36964e+06	706700	337331	711842	674242	362097	824867	646041	920855	798788
FALSE	High	Master Protein	TGGT1_215950-t26_1-p1	transcript=TGGT1_215950-t26_1 | gene=TGGT1_215950 | organism=Toxoplasma_gondii_GT1 | gene_product=HTH CENPB-type domain-containing protein [Source:UniProtKB/TrEMBL;Acc:A0A125YHY3] | transcript_product=hypothetical protein | location=TGGT1_chrXI:6422869-6428022(+) | protein_length=1717 | sequence_SO=chromosome | SO=protein_coding_gene | is_pseudo=false	0	5.759	1	2	3	2	1717	168.5	5.24	1.74	2	0.902	0.905	-0.15	-0.14	0.482553	0.933755	0.951523	0.987776	27.85	1.02	-0.15	0.15	-0.47	-0.14	0.23	-0.15	279386	288178	269255	6.18	8.88	15.77	282837	279386	252195	261914	312978	288178	269255	275196	323822	256539	263781	346429
FALSE	High	Master Protein	TGGT1_246000-t26_1-p1	transcript=TGGT1_246000-t26_1 | gene=TGGT1_246000 | organism=Toxoplasma_gondii_GT1 | gene_product=Large subunit ribosomal protein IMG2 [Source:UniProtKB/TrEMBL;Acc:S7W9F7] | transcript_product=large subunit ribosomal protein IMG2 | location=TGGT1_chrXII:2515835-2518292(+) | protein_length=310 | sequence_SO=chromosome | SO=protein_coding_gene | is_pseudo=false	0	5.725	7	2	7	2	310	33.4	10.86	3.85	2	1.351	1.071	0.43	0.1	0.622248	0.596362	0.971725	0.973941	0.14	14.6	-0.21	0.43	0.44	-0.07	0.1	0.23	253901	210156	227463	24.63	8.45	12.61	196251	253901	323039	210156	190298	225471	259534	192386	247860	227463	232912	267112
FALSE	High	Master Protein	TGGT1_320760-t26_1-p1	transcript=TGGT1_320760-t26_1 | gene=TGGT1_320760 | organism=Toxoplasma_gondii_GT1 | gene_product=hypothetical protein | transcript_product=hypothetical protein | location=TGGT1_chrIV:35039-39691(-) | protein_length=357 | sequence_SO=chromosome | SO=protein_coding_gene | is_pseudo=false	0	5.664	7	2	2	2	357	39.4	9.54	1.61	2	1.86	1.381	0.89	0.47	0.150509	0.226636	0.644054	0.770755	30.5	11.75	0.89	1.18	0.56	0.47	0.27	0.58	216526	158950	125291	17.81	17.33	8.73	216526	277771	199421	158950	145431	201419	125291	121378	156400	142072	148056	117421
FALSE	High	Master Protein	TGGT1_288630-t26_1-p1	transcript=TGGT1_288630-t26_1 | gene=TGGT1_288630 | organism=Toxoplasma_gondii_GT1 | gene_product=Putative nucleosome assembly protein (NAP) [Source:UniProtKB/TrEMBL;Acc:A0A125YGQ6] | transcript_product=putative nucleosome assembly protein (NAP) | location=TGGT1_chrIX:2455396-2456752(+) | protein_length=281 | sequence_SO=chromosome | SO=protein_coding_gene | is_pseudo=false	0	5.591	7	1	1	1	281	32.1	4.42	2.71	1	6.682	1.518	2.74	0.6	1.80188e-07	0.143994	6.31442e-06	0.634201	132.6	147.28	3.75	2.74	-0.5	-6.64	1.98	0.6	51432.3	33471.7	9809.19	88.3	13.7	64.84	132280	51432.3	17142.7		30372.7	36886.9		14143.9		9809.19	7326.82	28269.4
FALSE	High	Master Protein	TGGT1_310010-t26_1-p1	transcript=TGGT1_310010-t26_1 | gene=TGGT1_310010 | organism=Toxoplasma_gondii_GT1 | gene_product=Sushi domain-containing protein [Source:UniProtKB/TrEMBL;Acc:S7UT16] | transcript_product=rhoptry neck protein RON1 | location=TGGT1_chrXI:969238-974493(+) | protein_length=1158 | sequence_SO=chromosome | SO=protein_coding_gene | is_pseudo=false	0	5.539	1	1	3	1	1158	127.5	4.98	2.78	1	2.459	3.377	1.3	1.76	0.023606	0.000329327	0.216209	0.00449894	41.02	54.28	1.82	1.3	0.83	1.76	2.85	1.1	219826	281464	83350.6	36.22	68.67	7.2	295216	219826	137664	281464	644669	165677	83350.6	181005	89803.7	50704.4	89402.4	77402.6
FALSE	High	Master Protein	TGGT1_202610-t26_1-p1	transcript=TGGT1_202610-t26_1 | gene=TGGT1_202610 | organism=Toxoplasma_gondii_GT1 | gene_product=PPM-type phosphatase domain-containing protein [Source:UniProtKB/TrEMBL;Acc:S7UUM4] | transcript_product=protein phosphatase 2C domain-containing protein | location=TGGT1_chrVIIa:3070309-3077880(+) | protein_length=852 | sequence_SO=chromosome | SO=protein_coding_gene | is_pseudo=false	0	5.537	4	2	10	2	852	94	5.02	0	2	0.494	1.006	-1.02	0.01	0.0132091	0.716166	0.141953	0.973941	27.21	66.54	-0.6	-1.26	-1.02	0.6	0.01	-0.85	113533	151291	116247	43.1	59.89	35.68	148438	113533	57475.5	151291	250435	64447.1	165955	250277	116247	80293.9	66555	86808.8
FALSE	High	Master Protein	TGGT1_231640-t26_1-p1	transcript=TGGT1_231640-t26_1 | gene=TGGT1_231640 | organism=Toxoplasma_gondii_GT1 | gene_product=Alveolin domain containing intermediate filament IMC1 [Source:UniProtKB/TrEMBL;Acc:A0A125YFV6] | transcript_product=alveolin domain containing intermediate filament IMC1 | location=TGGT1_chrVIII:1511977-1514752(+) | protein_length=609 | sequence_SO=chromosome | SO=protein_coding_gene | is_pseudo=false	0	5.511	4	2	2	2	609	69.6	5.19	2.09	2	0.978	1.901	-0.03	0.93	0.644638	0.0394715	0.971725	0.268715	12.37	34.18	2.73	-0.03	-0.15	1.23	-3.93	0.93	29772.7	172172	20887.3	99.72	83.25	22.1	126543	20431.4	29772.7	172172	8475.51	222220	19049.7	182052	38072.3		20887.3	28563.3
FALSE	High	Master Protein	TGGT1_310870-t26_1-p1	transcript=TGGT1_310870-t26_1 | gene=TGGT1_310870 | organism=Toxoplasma_gondii_GT1 | gene_product=Putative integral membrane protein [Source:UniProtKB/TrEMBL;Acc:A0A125YMH4] | transcript_product=putative integral membrane protein | location=TGGT1_chrXI:1601682-1603927(+) | protein_length=201 | sequence_SO=chromosome | SO=protein_coding_gene | is_pseudo=false	0	5.483	10	2	8	2	201	21.9	8.9	3.65	2	0.882	1.316	-0.18	0.4	0.442982	0.279906	0.949873	0.819302	14.96	39.43	0.32	-0.32	-0.18	0.74	0.4	-0.1	352070	427823	346235	13.36	19.9	9.77	421044	326365	352070	547531	427823	372593	299897	320098	363438	296294	360395	403709
FALSE	High	Master Protein	TGGT1_319850-t26_1-p1	transcript=TGGT1_319850-t26_1 | gene=TGGT1_319850 | organism=Toxoplasma_gondii_GT1 | gene_product=RRM domain-containing protein [Source:UniProtKB/TrEMBL;Acc:S7UK80] | transcript_product=splicing factor U2AF family SnRNP auxilary factor large subunit, RRM domain-containing protein | location=TGGT1_chrIV:689661-691811(+) | protein_length=495 | sequence_SO=chromosome | SO=protein_coding_gene | is_ps…	0	5.464	2	1	4	1	495	51.6	9.06	2.22	1	0.593	0.271	-0.75	-1.88	0.0524632	0.00173151	0.363235	0.0202261	18.45	0.09	0.72	-0.92	-0.75	-1.15	-1.88	-1.89	186327	85012.2	291799	42.68	7.2	21.98	333870	153953	186327	91287.6	79034.9	85012.2	104997	105351	123893	287279	291799	373171
FALSE	High	Master Protein	TGGT1_284630-t26_1-p1	transcript=TGGT1_284630-t26_1 | gene=TGGT1_284630 | organism=Toxoplasma_gondii_GT1 | gene_product=hypothetical protein | transcript_product=hypothetical protein | location=TGGT1_chrV:2499413-2499643(-) | protein_length=76 | sequence_SO=chromosome | SO=protein_coding_gene | is_pseudo=false	0	5.457	14	1	6	1	76	8.9	9.5	5.36	1	1.152	0.557	0.2	-0.84	0.982777	0.225384	0.998872	0.770029	80.58	11.72	0.2	-0.93	1	-0.73	-1.03	-0.84	194153	77613.2	158979	43.19	26.05	22.17	194153	83579.6	216444	101925	77613.2	60456.9	108817	69779.4	71775.2	168574	158979	108577
FALSE	High	Master Protein	TGGT1_221610-t26_1-p1	transcript=TGGT1_221610-t26_1 | gene=TGGT1_221610 | organism=Toxoplasma_gondii_GT1 | gene_product=USP domain-containing protein [Source:UniProtKB/TrEMBL;Acc:S7UKI2] | transcript_product=ubiquitin carboxyl-terminal hydrolase | location=TGGT1_chrII:464467-468768(+) | protein_length=795 | sequence_SO=chromosome | SO=protein_coding_gene | is_pseudo=false	0	5.455	1	1	1	1	795	87	7.49	2.08	1	1.54	0.584	0.62	-0.78	0.378429	0.278243	0.949873	0.818481	27.25	2.73	0.62	0.87	0.2	-0.78	-0.75	-0.8	210085	85565.3	146460	9.97	14.94	16.68	225582	210085	184736	85565.3	68576.7	92431.4	94623.9	82234.5	128170	146460	161439	202969
FALSE	High	Master Protein	TGGT1_318560-t26_1-p1	transcript=TGGT1_318560-t26_1 | gene=TGGT1_318560 | organism=Toxoplasma_gondii_GT1 | gene_product=Protein-serine/threonine kinase [Source:UniProtKB/TrEMBL;Acc:S7UKA1] | transcript_product=ATPase/histidine kinase/DNA gyrase B/HSP90 domain-containing protein | location=TGGT1_chrIV:1166360-1172757(-) | protein_length=468 | sequence_SO=chromosome | SO=protein_coding_gene | is_pseudo=false	0	5.452	3	1	2	1	468	52.7	8.92	0	1	1.435	0.946	0.52	-0.08	0.501487	0.841878	0.951523	0.987776	8.14	22.89	1.72	0.44	0.52	0.16	-0.08	-0.79	98853.3	54466.3	67915.2	54.45	23.21	18.41	226646	92126.7	98853.3	54466.3	64233.3	39854.9	41871.1	67915.2	68874.5	48699.1	76080.6	89537.1
FALSE	High	Master Protein	TGGT1_293480-t26_1-p1	transcript=TGGT1_293480-t26_1 | gene=TGGT1_293480 | organism=Toxoplasma_gondii_GT1 | gene_product=MoeA N-terminal region (Domain I and II) domain-containing protein [Source:UniProtKB/TrEMBL;Acc:A0A125YLI7] | transcript_product=MoeA N-terminal region (domain I and II) domain-containing protein | location=TGGT1_chrIa:337858-341625(-) | protein_length=1255 | sequence_SO=chromosome | SO=protein_codin…	0	5.451	2	2	3	2	1255	133.7	7.88	0	2	0.662	0.937	-0.6	-0.09	0.106261	0.861675	0.542067	0.987776	25.61	6	-0.6	-0.32	-6.64	0.16	-0.15	-0.09	80447.9	151381	161706	55.93	43.37	25.6	122228	52948.9		67343.5	176368	151381	99562	220976	161706	99918	48678.1	174034
FALSE	High	Master Protein	TGGT1_267760-t26_1-p1	transcript=TGGT1_267760-t26_1 | gene=TGGT1_267760 | organism=Toxoplasma_gondii_GT1 | gene_product=hypothetical protein | transcript_product=hypothetical protein | location=TGGT1_chrIX:207816-214692(+) | protein_length=1547 | sequence_SO=chromosome | SO=protein_coding_gene | is_pseudo=false	0	5.443	1	1	1	1	1547	167.5	8.43	3.08	1	1.061	0.01	0.09	-6.64	0.825902	1e-17	0.995562	2.015e-16	146.86	0	-6.64	6.64	0.09	-6.64		-6.64	9079.62		7435.33	4.22		15.55		9354.57	8812.75									8303.26
FALSE	High	Master Protein	TGGT1_248320-t26_1-p1	transcript=TGGT1_248320-t26_1 | gene=TGGT1_248320 | organism=Toxoplasma_gondii_GT1 | gene_product=Carrier superfamily protein [Source:UniProtKB/TrEMBL;Acc:S7WGM8] | transcript_product=carrier superfamily protein | location=TGGT1_chrXII:3739568-3740644(-) | protein_length=358 | sequence_SO=chromosome | SO=protein_coding_gene | is_pseudo=false	0	5.371	3	1	11	1	358	38.9	9.55	13.46	1	0.835	0.989	-0.26	-0.02	0.353373	0.749897	0.938934	0.976829	42.15	72.78	0.22	-0.74	-0.26	0.96	-0.02	-0.71	238057	299361	291494	15.6	37.58	20.31	238057	181250	243477	396293	299361	177919	239842	308429	206596	203983	190170	291494
FALSE	High	Master Protein	TGGT1_220480-t26_1-p1	transcript=TGGT1_220480-t26_1 | gene=TGGT1_220480 | organism=Toxoplasma_gondii_GT1 | gene_product=hypothetical protein | transcript_product=hypothetical protein | location=TGGT1_chrV:310116-314943(-) | protein_length=809 | sequence_SO=chromosome | SO=protein_coding_gene | is_pseudo=false	0	5.356	3	1	1	1	809	88.4	7.31	0	1	3.872	1.762	1.95	0.82	0.000310821	0.0631732	0.00736829	0.382839	72.32	1.07	2.53	1.95	0.92	0	0.82	0.83	101346	46120.1	26170.8	32.53	44.66	20.89	114833	101346	57946.7	19958.7	46120.1	54228	28812.4	49443.6	30551.8	19931.4	26170.8	53538.2
FALSE	High	Master Protein	TGGT1_289140-t26_1-p1	transcript=TGGT1_289140-t26_1 | gene=TGGT1_289140 | organism=Toxoplasma_gondii_GT1 | gene_product=L51_S25_CI-B8 domain-containing protein [Source:UniProtKB/TrEMBL;Acc:A0A125YVS0] | transcript_product=putative ribosomal protein l22/l43 | location=TGGT1_chrIX:2830912-2832339(+) | protein_length=203 | sequence_SO=chromosome | SO=protein_coding_gene | is_pseudo=false	0	5.341	7	1	1	1	203	23.6	10.43	2.14	1	3.398	1.262	1.76	0.34	0.00128232	0.332507	0.0212956	0.875727	25.41	77.56	1.99	1.76	0.88	-0.73	0.34	1.1	208864	82999.1	54113.2	38.3	55.32	12.6	208864	223414	99269.7	31585.8	82999.1	115937	45811.3	67137.8	54113.2	52469.2	65744.9	114461
FALSE	High	Master Protein	TGGT1_239740-t26_1-p1	transcript=TGGT1_239740-t26_1 | gene=TGGT1_239740 | organism=Toxoplasma_gondii_GT1 | gene_product=Dense granule protein GRA14 [Source:UniProtKB/TrEMBL;Acc:A0A125YJW1] | transcript_product=dense granule protein GRA14 | location=TGGT1_chrVI:875718-876944(-) | protein_length=408 | sequence_SO=chromosome | SO=protein_coding_gene | is_pseudo=false	0	5.328	5	2	6	2	408	44.7	8.5	0	2	0.891	1.258	-0.17	0.33	0.461367	0.337529	0.949873	0.875727	6.22	6.53	-0.23	-0.17	-0.06	0.27	0.5	0.33	218116	294766	206658	7.91	27.16	34.63	218116	205320	239921	176910	294766	301129	253215	236443	121031	147142	206658	284210
FALSE	High	Master Protein	TGGT1_210960-t26_1-p1	transcript=TGGT1_210960-t26_1 | gene=TGGT1_210960 | organism=Toxoplasma_gondii_GT1 | gene_product=AAA domain-containing protein [Source:UniProtKB/TrEMBL;Acc:S7UKN7] | transcript_product=putative replication factor C subunit 4 | location=TGGT1_chrIV:1930784-1936096(+) | protein_length=351 | sequence_SO=chromosome | SO=protein_coding_gene | is_pseudo=false	0	5.321	5	1	2	1	351	39.3	6.65	0	1	1.727	0.531	0.79	-0.91	0.222586	0.180233	0.791909	0.685227	24.73	45.53	0.79	0.28	1.01	-1.96	-0.91	-0.38	67577.7	17269.6	39122.6	36.8	58.33	13.86	67577.7	39454.3	86699.9	10033.9	17269.6	32952	15347.2	13712.6	21796.1	39122.6	67638.5	99613.8
FALSE	High	Master Protein	TGGT1_278440-t26_1-p1	transcript=TGGT1_278440-t26_1 | gene=TGGT1_278440 | organism=Toxoplasma_gondii_GT1 | gene_product=Putative SWI2/SNF2 Brahma [Source:UniProtKB/TrEMBL;Acc:S7UZS0] | transcript_product=putative SWI2/SNF2 Brahma | location=TGGT1_chrXII:6010021-6025169(+) | protein_length=2667 | sequence_SO=chromosome | SO=protein_coding_gene | is_pseudo=false	0	5.312	1	3	4	3	2667	285	7.25	0	3	0.564	0.853	-0.83	-0.23	0.0366917	0.939953	0.295735	0.987776	41.72	24.03	-0.83	-1.2	-0.35	-0.23	0.03	-0.5	69975.2	142804	146672	42.4	19.94	3.65	46842.5	69975.2	110262	142804	151476	102129	84832	149243	58576.2	146672	122287	139068
FALSE	High	Master Protein	TGGT1_207450-t26_1-p1	transcript=TGGT1_207450-t26_1 | gene=TGGT1_207450 | organism=Toxoplasma_gondii_GT1 | gene_product=RNA-splicing ligase RtcB homolog [Source:UniProtKB/TrEMBL;Acc:A0A125YNQ4] | transcript_product=DNA segment, Chr 10, Wayne State University 52, expressed family protein | location=TGGT1_chrIb:84413-90271(+) | protein_length=519 | sequence_SO=chromosome | SO=protein_coding_gene | is_pseudo=false	0	5.284	4	2	2	2	519	56.3	7.69	2.27	2	1.187	0.65	0.25	-0.62	0.911601	0.422817	0.995562	0.920068	40.64	22.32	0.81	0.25	-0.21	-0.39	-0.62	-1.19	398930	189278	266068	11.79	4.12	14.91	432608	341475	398930	189278	193652	178659	125803	205157	159040	300661	299038	560902
FALSE	High	Master Protein	TGGT1_254620-t26_1-p1	transcript=TGGT1_254620-t26_1 | gene=TGGT1_254620 | organism=Toxoplasma_gondii_GT1 | gene_product=Ribosomal protein RPL39 [Source:UniProtKB/TrEMBL;Acc:S7UM53] | transcript_product=ribosomal protein RPL39 | location=TGGT1_chrIII:1840786-1841847(-) | protein_length=68 | sequence_SO=chromosome | SO=protein_coding_gene | is_pseudo=false	0	5.267	15	1	7	1	68	8.3	12.02	11.36	1	1.206	0.754	0.27	-0.41	0.874867	0.685627	0.995562	0.973941	5.4	32.66	0.27	0.63	0.22	-1.07	-0.41	-0.05	293483	143407	246851	5.22	36.05	16.31	316559	293483	286830	125178	143407	238685	221037	187409	246851	292491	190221	291267
FALSE	High	Master Protein	TGGT1_263870-t26_1-p1	transcript=TGGT1_263870-t26_1 | gene=TGGT1_263870 | organism=Toxoplasma_gondii_GT1 | gene_product=GST C-terminal domain-containing protein [Source:UniProtKB/TrEMBL;Acc:S7WDQ1] | transcript_product=glutamate-tRNA ligase | location=TGGT1_chrVIIb:247108-256643(-) | protein_length=828 | sequence_SO=chromosome | SO=protein_coding_gene | is_pseudo=false	0	5.214	3	1	1	1	828	92.5	8.85	2.33	1	100		6.64		1e-17		4.24211e-16		0				6.64				257016								257016
FALSE	High	Master Protein	TGGT1_269410-t26_1-p1	transcript=TGGT1_269410-t26_1 | gene=TGGT1_269410 | organism=Toxoplasma_gondii_GT1 | gene_product=hypothetical protein | transcript_product=hypothetical protein | location=TGGT1_chrVIII:5829826-5831837(+) | protein_length=217 | sequence_SO=chromosome | SO=protein_coding_gene | is_pseudo=false	0	5.213	8	1	3	1	217	24.1	8.87	3.47	1	4.346	2.046	2.12	1.03	7.92059e-05	0.0240448	0.002128	0.181123	15.77	147.54	2.12	2.27	-0.01	-6.64	2.06	1.03	178475	175695	57457.9	43.87	17.57	47.84	249685	178475	96398.9		155073	199059			97269.1	54497	71638.6	137223
FALSE	High	Master Protein	TGGT1_225125-t26_1-p1	transcript=TGGT1_225125-t26_1 | gene=TGGT1_225125 | organism=Toxoplasma_gondii_GT1 | gene_product=Pre-rRNA processing protein [Source:UniProtKB/TrEMBL;Acc:S7W597] | transcript_product=pre-rRNA processing protein | location=TGGT1_chrX:2378306-2392984(+) | protein_length=2871 | sequence_SO=chromosome | SO=protein_coding_gene | is_pseudo=false	0	5.207	1	2	3	2	2871	310.5	8.07	0	2	0.838	0.788	-0.26	-0.34	0.357818	0.773127	0.938934	0.978242	52.38	10.67	0.37	-0.26	-0.84	-0.34	-0.44	-0.09	103342	103839	127196	35.81	24.91	21.29	164313	103342	83886.5	103839	89835.6	143844	108880	110725	172221	127196	116612	175953
FALSE	High	Master Protein	TGGT1_289690-t26_1-p1	transcript=TGGT1_289690-t26_1 | gene=TGGT1_289690 | organism=Toxoplasma_gondii_GT1 | gene_product=Glyceraldehyde-3-phosphate dehydrogenase [Source:UniProtKB/TrEMBL;Acc:S7UQ54] | transcript_product=glyceraldehyde-3-phosphate dehydrogenase GAPDH1 | location=TGGT1_chrIX:3189155-3191218(-) | protein_length=489 | sequence_SO=chromosome | SO=protein_coding_gene | is_pseudo=false	0	5.18	3	1	1	1	489	53.3	8.31	2.58	1	0.01	0.099	-6.64	-3.34	1e-17	5.9465e-09	4.24211e-16	1.04193e-07	0	148.11		-6.64	-6.64	6.64	-6.64	-3.34		13090.5	51179.8		24.61	91.87				15606.7		10979.9			111048
FALSE	High	Master Protein	TGGT1_212290-t26_1-p1	transcript=TGGT1_212290-t26_1 | gene=TGGT1_212290 | organism=Toxoplasma_gondii_GT1 | gene_product=Ribosomal protein RPS19 [Source:UniProtKB/TrEMBL;Acc:S7UVX4] | transcript_product=ribosomal protein RPS19 | location=TGGT1_chrX:3845925-3847625(-) | protein_length=313 | sequence_SO=chromosome | SO=protein_coding_gene | is_pseudo=false	0	5.164	6	2	26	2	313	34.9	8.68	5.26	2	0.947	1.775	-0.08	0.83	0.576951	0.0605209	0.971725	0.378138	1.31	17.2	0.07	-0.08	-0.09	0.83	0.65	1.15	617018	875240	557155	8.04	27.41	2.98	642429	548730	617018	875240	860370	1.35705e+06	1.06903e+06	839769	1.33966e+06	355333	544286	557155
FALSE	High	Master Protein	TGGT1_205010-t26_1-p1	transcript=TGGT1_205010-t26_1 | gene=TGGT1_205010 | organism=Toxoplasma_gondii_GT1 | gene_product=SF3b1 domain-containing protein [Source:UniProtKB/TrEMBL;Acc:S7UUF2] | transcript_product=putative U2 small nuclear ribonucleoprotein family protein | location=TGGT1_chrVIIa:1582142-1590578(-) | protein_length=1386 | sequence_SO=chromosome | SO=protein_coding_gene | is_pseudo=false	0	5.143	2	2	2	2	1386	150.7	5.95	0	2	2.84	0.918	1.51	-0.12	0.0071664	0.90518	0.0931632	0.987776	17.21	58.2	0.44	1.51	1.66	-1.89	-0.12	0.6	134529	9103.81	11593.6	17.02	49.73	55.58	134529	108544	153337	6983.62	9103.81	17514.3		5762.69	11593.6	53388.9	41075.7	93414.7
FALSE	High	Master Protein	TGGT1_217740-t26_1-p1	transcript=TGGT1_217740-t26_1 | gene=TGGT1_217740 | organism=Toxoplasma_gondii_GT1 | gene_product=3-ketoacyl-(Acyl-carrier-protein) reductase [Source:UniProtKB/TrEMBL;Acc:S7V1K3] | transcript_product=3-ketoacyl-(acyl-carrier-protein) reductase | location=TGGT1_chrXII:2024723-2028460(+) | protein_length=376 | sequence_SO=chromosome | SO=protein_coding_gene | is_pseudo=false	0	5.142	7	2	5	2	376	39	9.23	0	2	1.718	1.343	0.78	0.43	0.228667	0.256827	0.795241	0.812006	48.46	46.4	1.27	0.21	0.78	0.43	-0.12	0.99	202397	107495	108851	3.36	50.06	50.42	197409	210933	202397	107495	104423	235149	41682	94721	179029	80829.2	134370	93672.4
FALSE	High	Master Protein	TGGT1_306060-t26_1-p1	transcript=TGGT1_306060-t26_1 | gene=TGGT1_306060 | organism=Toxoplasma_gondii_GT1 | gene_product=Rhoptry neck protein RON8 [Source:UniProtKB/TrEMBL;Acc:A0A125YNG1] | transcript_product=rhoptry neck protein RON8 | location=TGGT1_chrIX:5560917-5575203(-) | protein_length=2980 | sequence_SO=chromosome | SO=protein_coding_gene | is_pseudo=false	0	5.139	1	2	4	2	2980	328.8	8.4	0	2	2.104	1.229	1.07	0.3	0.0713414	0.369576	0.428274	0.888356	42.28	19.84	1.77	1.07	0.59	0.09	0.3	0.59	449957	321241	186644	26.63	34.67	15.86	498511	449957	288705	166859	343046	321241	132877	275031	190791	166034	186644	258452
FALSE	High	Master Protein	TGGT1_270620-t26_1-p1	transcript=TGGT1_270620-t26_1 | gene=TGGT1_270620 | organism=Toxoplasma_gondii_GT1 | gene_product=DEAD/DEAH box helicase domain-containing protein [Source:UniProtKB/TrEMBL;Acc:S7WD81] | transcript_product=DEAD/DEAH box helicase domain-containing protein | location=TGGT1_chrVIII:5119854-5125995(-) | protein_length=943 | sequence_SO=chromosome | SO=protein_coding_gene | is_pseudo=false	0	5.127	2	2	2	2	943	102.3	9.26	3.56	2	0.125	0.01	-3	-6.64	5.98677e-11	1e-17	2.19333e-09	2.015e-16	106.47	0	-6.64	-3	-1.17	-6.64	-6.64	-6.64	31974.5		167250	48.68		22.97		22333.8	45776.7				44259.9		45692.6	159350	87554.6	167250
FALSE	High	Master Protein	TGGT1_239760-t26_1-p1	transcript=TGGT1_239760-t26_1 | gene=TGGT1_239760 | organism=Toxoplasma_gondii_GT1 | gene_product=Ribosomal protein RPL22 [Source:UniProtKB/TrEMBL;Acc:A0A125YT45] | transcript_product=ribosomal protein RPL22 | location=TGGT1_chrVI:893982-895795(-) | protein_length=133 | sequence_SO=chromosome | SO=protein_coding_gene | is_pseudo=false	0	5.118	14	2	14	2	133	15.1	9.89	10.81	2	1.128	0.762	0.17	-0.39	0.967327	0.70661	0.995562	0.973941	16.78	9.62	0.17	0.33	-0.62	-0.39	-0.48	0.08	668661	392140	729892	15.62	55.52	26.61	668661	799410	587345	392140	333938	873223	537170	420390	937335	403635	729892	486648
FALSE	High	Master Protein	TGGT1_313640-t26_1-p1	transcript=TGGT1_313640-t26_1 | gene=TGGT1_313640 | organism=Toxoplasma_gondii_GT1 | gene_product=hypothetical protein | transcript_product=hypothetical protein | location=TGGT1_chrXI:3542451-3543056(+) | protein_length=201 | sequence_SO=chromosome | SO=protein_coding_gene | is_pseudo=false	0	5.084	14	2	2	2	201	22.3	6.39	2.41	2	0.605	0.75	-0.72	-0.42	0.0601962	0.674517	0.385065	0.973941	47.84	70.03	-0.16	-1.32	-0.72	-1.19	0.51	-0.42	59323.8	73285	80076.1	12	67.11	12.47	72491.2	59323.8	59188.5	20063.6	111114	73285	45618.2	42644.9	80731.7	80076.1	78612.7	97762.5
FALSE	High	Master Protein	TGGT1_269650-t26_1-p1	transcript=TGGT1_269650-t26_1 | gene=TGGT1_269650 | organism=Toxoplasma_gondii_GT1 | gene_product=FFD and TFG box motifs protein [Source:UniProtKB/TrEMBL;Acc:A0A125YUH5] | transcript_product=FFD and TFG box motifs protein | location=TGGT1_chrVIII:5714889-5717952(+) | protein_length=492 | sequence_SO=chromosome | SO=protein_coding_gene | is_pseudo=false	0	4.997	3	1	1	1	492	51.4	7.14	0	1	1.264	0.495	0.34	-1.01	0.766265	0.127375	0.995562	0.590572	36.15	23.65	2	0.34	-0.06	-1.01	-1.23	-0.64	120315	40646.9	95162.3	50.78	41.07	26.18	245747	120315	100090	30373.1	40646.9	67009.7	27506.8	41339.5	76807.2	61327.9	122527	104692
FALSE	High	Master Protein	TGGT1_245730-t26_1-p1	transcript=TGGT1_245730-t26_1 | gene=TGGT1_245730 | organism=Toxoplasma_gondii_GT1 | gene_product=PIPK domain-containing protein [Source:UniProtKB/TrEMBL;Acc:S7V190] | transcript_product=phosphatidylinositol-4-phosphate 5-Kinase | location=TGGT1_chrXII:2437394-2453879(+) | protein_length=2139 | sequence_SO=chromosome | SO=protein_coding_gene | is_pseudo=false	0	4.976	1	1	1	1	2139	231.9	7.66	0	1	3.434	2.577	1.78	1.37	0.00115143	0.00409765	0.0197458	0.0423423	7.31	110.11	1.78	1.85	-6.64	-6.64	1.37	2.17	76142.3	64848.1	21028.1	0.7	25.13	12.89	76521.7	75764.7			54186.5	77607.4	19926.2	44150.9	17802.1	24923.8
FALSE	High	Master Protein	TGGT1_281610-t26_1-p1	transcript=TGGT1_281610-t26_1 | gene=TGGT1_281610 | organism=Toxoplasma_gondii_GT1 | gene_product=hypothetical protein | transcript_product=hypothetical protein | location=TGGT1_chrVIIa:4122946-4124326(+) | protein_length=293 | sequence_SO=chromosome | SO=protein_coding_gene | is_pseudo=false	0	4.96	4	1	10	1	293	32.7	9.86	8.38	1	1.638	0.891	0.71	-0.17	0.288214	0.966807	0.885998	0.987776	6.04	41.77	0.71	0.87	0.65	-0.17	-0.52	0.81	465560	253410	256968	23.36	30.54	19.51	465560	469648	300942	253410	178706	334812	302590	256968	346685	156817	254827	188013
FALSE	High	Master Protein	TGGT1_230180-t26_1-p1	transcript=TGGT1_230180-t26_1 | gene=TGGT1_230180 | organism=Toxoplasma_gondii_GT1 | gene_product=hypothetical protein | transcript_product=hypothetical protein | location=TGGT1_chrVIII:662231-666509(-) | protein_length=542 | sequence_SO=chromosome | SO=protein_coding_gene | is_pseudo=false	0	4.938	4	2	8	2	542	57.3	10.14	3.68	2	2.097	1.189	1.07	0.25	0.0730293	0.417741	0.429647	0.920068	24.84	5.84	1.07	1.29	0.53	0.08	0.25	0.31	710435	430018	362984	20.35	12.91	7.88	710435	881469	587171	389726	430018	502037	362984	427720	545934	302799	354406	409430
FALSE	High	Master Protein	TGGT1_212130-t26_1-p1	transcript=TGGT1_212130-t26_1 | gene=TGGT1_212130 | organism=Toxoplasma_gondii_GT1 | gene_product=PNPLA domain-containing protein [Source:UniProtKB/TrEMBL;Acc:S7UWG7] | transcript_product=phospholipase, patatin family protein | location=TGGT1_chrX:3947536-3959836(+) | protein_length=994 | sequence_SO=chromosome | SO=protein_coding_gene | is_pseudo=false	0	4.918	3	2	6	2	994	109.8	8.68	0	2	1.036	1.046	0.05	0.07	0.770228	0.639349	0.995562	0.973941	4.62	50.15	0.05	0.01	0.63	0.61	0.07	-0.53	61567	64190.6	85689.9	7.45	79.8	10.5	57885.8	61567	67083.7	160985	64190.6	30093.4	200869	61350.8	18143	63271.2	93013.2	75320.7
FALSE	High	Master Protein	TGGT1_217830-t26_1-p1	transcript=TGGT1_217830-t26_1 | gene=TGGT1_217830 | organism=Toxoplasma_gondii_GT1 | gene_product=hypothetical protein | transcript_product=hypothetical protein | location=TGGT1_chrXII:2095805-2105329(-) | protein_length=1917 | sequence_SO=chromosome | SO=protein_coding_gene | is_pseudo=false	0	4.892	2	2	2	2	1917	202.9	7.85	0	2	1.827	0.957	0.87	-0.06	0.165813	0.818203	0.678401	0.987776	13.94	25.85	0.87	1	0.66	-0.06	0.21	-6.64	129844	85139.2	101349	21.76	18.27	23.7	185182	128984	129844	96953.1	74764.8		55582.3	64526.9		101349	185575	179095
FALSE	High	Master Protein	TGGT1_228360-t26_1-p1	transcript=TGGT1_228360-t26_1 | gene=TGGT1_228360 | organism=Toxoplasma_gondii_GT1 | gene_product=Peptidylprolyl isomerase [Source:UniProtKB/TrEMBL;Acc:S7UXV4] | transcript_product=putative peptidyl-prolyl isomerase FKBP12 | location=TGGT1_chrX:286110-288045(+) | protein_length=362 | sequence_SO=chromosome | SO=protein_coding_gene | is_pseudo=false	0	4.861	4	1	1	1	362	38.2	9.38	2.33	1	3.842	0.75	1.94	-0.41	0.000340402	0.676511	0.00783896	0.973941	89.87	78.88	2.63	1.94	0.51	-1.34	0.68	-0.41	167078	35022	43491.7	46.25	74.47	21.19	188609	167078	66631.9	12114.3	69741.1	35022		48099.7	23430.6	23556.8	43491.7	58122.3
FALSE	High	Master Protein	TGGT1_207920-t26_1-p1	transcript=TGGT1_207920-t26_1 | gene=TGGT1_207920 | organism=Toxoplasma_gondii_GT1 | gene_product=hypothetical protein | transcript_product=hypothetical protein | location=TGGT1_chrIb:453863-457810(+) | protein_length=726 | sequence_SO=chromosome | SO=protein_coding_gene | is_pseudo=false	0	4.842	2	1	4	1	726	80.4	8.4	4.59	1	0.721	1.738	-0.47	0.8	0.172497	0.0686852	0.691058	0.397663	16.53	0.37	-0.47	0.54	-0.63	0.8	0.32	0.8	28518.6	61911.1	41695.1	50.49	19.5	10.68	25677.5	60416.6	28518.6	61911.1	52007.8	76618.3	59593.7	46664.5	62765.4	30624.3		43982.6
FALSE	High	Master Protein	TGGT1_260450-t26_1-p1	transcript=TGGT1_260450-t26_1 | gene=TGGT1_260450 | organism=Toxoplasma_gondii_GT1 | gene_product=DEAD/DEAH box helicase domain-containing protein [Source:UniProtKB/TrEMBL;Acc:S7WEJ6] | transcript_product=DEAD/DEAH box helicase domain-containing protein | location=TGGT1_chrVIIb:2234165-2241549(+) | protein_length=1841 | sequence_SO=chromosome | SO=protein_coding_gene | is_pseudo=false	0	4.786	1	1	1	1	1841	199.7	6.7	2.82	1	2.026	0.01	1.02	-6.64	0.0909498	1e-17	0.485467	2.015e-16	29.41	0	1.42	1.02	0.7	-6.64	-1.18	-6.64	74764.1	16254.8	34598	39.4		21.34	92419.2	74764.1	39202.1		16254.8			29424.9	13035	49083.6	46302.3	44717.6
FALSE	High	Master Protein	TGGT1_273730-t26_1-p1	transcript=TGGT1_273730-t26_1 | gene=TGGT1_273730 | organism=Toxoplasma_gondii_GT1 | gene_product=PNPLA domain-containing protein [Source:UniProtKB/TrEMBL;Acc:S7WJV4] | transcript_product=phospholipase, patatin family protein | location=TGGT1_chrVIII:3297858-3301354(-) | protein_length=656 | sequence_SO=chromosome | SO=protein_coding_gene | is_pseudo=false	0	4.774	4	2	2	2	656	72	8.9	1.83	2	2.097	1.165	1.07	0.22	0.0730185	0.449778	0.429647	0.924827	4.93	22.89	0.84	1.07	1.12	-0.02	0.22	0.59	201545	107058	95190.5	21.25	1.39	11.45	169503	201545	257481	107058	104768	107548	95190.5	96171.5	77896.4	204541	122727	173412
FALSE	High	Master Protein	TGGT1_260240-t26_1-p1	transcript=TGGT1_260240-t26_1 | gene=TGGT1_260240 | organism=Toxoplasma_gondii_GT1 | gene_product=Ccr4-associated factor family protein [Source:UniProtKB/TrEMBL;Acc:S7UY95] | transcript_product=ccr4-associated factor family protein | location=TGGT1_chrVIIb:2404604-2407464(+) | protein_length=617 | sequence_SO=chromosome | SO=protein_coding_gene | is_pseudo=false	0	4.77	4	2	5	2	617	64.2	6.01	0	2	1.569	1.178	0.65	0.24	0.349998	0.432793	0.938934	0.924827	11.63	13.56	0.76	0.65	0.32	0.46	0.24	0.1	186187	144248	115829	11.99	13.17	27.57	186187	155360	196775	154654	118981	144248	107462	102139	122002	115829	102515	169877
FALSE	High	Master Protein	TGGT1_222300-t26_1-p1	transcript=TGGT1_222300-t26_1 | gene=TGGT1_222300 | organism=Toxoplasma_gondii_GT1 | gene_product=hypothetical protein | transcript_product=hypothetical protein | location=TGGT1_chrII:997106-1002828(-) | protein_length=1468 | sequence_SO=chromosome | SO=protein_coding_gene | is_pseudo=false	0	4.759	2	2	6	2	1468	159	5.64	0	2	0.593	0.186	-0.75	-2.43	0.0520481	3.57105e-05	0.363235	0.000543069	21.1	2.53	0.22	-0.95	-0.75	-2.45	-2.43	-0.96	221175	20091.6	113539	32.75	135.5	85.6	256424	128366	221175	15619.4	20091.6	210205	27959.3	113539	342297	85384.7	65275.3	388977
FALSE	High	Master Protein	TGGT1_286510-t26_1-p1	transcript=TGGT1_286510-t26_1 | gene=TGGT1_286510 | organism=Toxoplasma_gondii_GT1 | gene_product=hypothetical protein | transcript_product=hypothetical protein | location=TGGT1_chrV:1659024-1660514(-) | protein_length=496 | sequence_SO=chromosome | SO=protein_coding_gene | is_pseudo=false	0	4.748	4	1	1	1	496	53.2	6.52	0	1	1.328	1.057	0.41	0.08	0.657761	0.620521	0.971725	0.973941	55.42	27.05	-0.27	0.41	2.77	-1.41	0.32	0.08	58797	26630.3	41964.6	51.74	51.66	58.92	58797	55737.8	130385	26630.3	52436	20142.7	33628.4	41964.6	16351.2	70692.4	86771.2	101174
FALSE	High	Master Protein	TGGT1_275460-t26_1-p1	transcript=TGGT1_275460-t26_1 | gene=TGGT1_275460 | organism=Toxoplasma_gondii_GT1 | gene_product=hypothetical protein | transcript_product=hypothetical protein | location=TGGT1_chrX:7169796-7170653(+) | protein_length=285 | sequence_SO=chromosome | SO=protein_coding_gene | is_pseudo=false	0	4.745	14	1	1	1	285	30.7	6.19	0	1	1.493	0.01	0.58	-6.64	0.430499	1e-17	0.949873	2.015e-16	34.81	0	0.91	0.24		-6.64	-6.64		90889.3		60885	10.71		42.3	84250	98051.8					71982.4	82890.6
FALSE	High	Master Protein	TGGT1_248420-t26_1-p1	transcript=TGGT1_248420-t26_1 | gene=TGGT1_248420 | organism=Toxoplasma_gondii_GT1 | gene_product=hypothetical protein | transcript_product=hypothetical protein | location=TGGT1_chrXII:3772416-3776263(-) | protein_length=728 | sequence_SO=chromosome | SO=protein_coding_gene | is_pseudo=false	0	4.745	2	1	1	1	728	79	6.24	2.31	1	2.167	1.291	1.12	0.37	0.0587862	0.304064	0.385065	0.849797	1.74	4.05	1.12	0.98	1.13	0.37	0.27	0.41	55569	33096.4	26691.5	8.7	8.51	5.23	55569	52689	62329.1	33096.4	32267.4	37694.9	25645.2	26691.5	28431.5	25713.5	35016.6	33091.9
FALSE	High	Master Protein	TGGT1_359190-t26_1-p1	transcript=TGGT1_359190-t26_1 | gene=TGGT1_359190 | organism=Toxoplasma_gondii_GT1 | gene_product=Leucine rich repeat protein [Source:UniProtKB/TrEMBL;Acc:S7UIY6] | transcript_product=leucine rich repeat protein | location=TGGT1_chrIa:1262349-1265010(+) | protein_length=498 | sequence_SO=chromosome | SO=protein_coding_gene | is_pseudo=false	0	4.73	4	2	7	2	498	52.1	10.04	2.13	2	1.487	1	0.57	0	0.437695	0.727974	0.949873	0.976829	13.1	6.65	-0.12	0.57	0.69	0	-0.06	0.83	302256	311095	308944	26.96	3.24	31.45	302256	461363	292199	311364	294061	311095	339902	308944	321286	219354	214114	157582
FALSE	High	Master Protein	TGGT1_314480-t26_1-p1	transcript=TGGT1_314480-t26_1 | gene=TGGT1_314480 | organism=Toxoplasma_gondii_GT1 | gene_product=hypothetical protein | transcript_product=hypothetical protein | location=TGGT1_chrXI:4085755-4095302(+) | protein_length=830 | sequence_SO=chromosome | SO=protein_coding_gene | is_pseudo=false	0	4.644	3	2	2	2	830	92.1	9.66	0	2	0.01	0.656	-6.64	-0.61	1e-17	0.438129	4.24211e-16	0.924827	0	32.01	0.94	-6.64	-6.64	-0.61	-0.26	-1.85	23531.8	8030.25	41588.5		49.52	53.4	23531.8			8030.25	17562.1	7927.48	6237.85			12240.7	16855	31488
FALSE	High	Master Protein	TGGT1_233230-t26_1-p1	transcript=TGGT1_233230-t26_1 | gene=TGGT1_233230 | organism=Toxoplasma_gondii_GT1 | gene_product=RRM domain-containing protein [Source:UniProtKB/TrEMBL;Acc:S7V3Q8] | transcript_product=RNA-binding protein 8A family protein | location=TGGT1_chrVIII:2518761-2521941(+) | protein_length=162 | sequence_SO=chromosome | SO=protein_coding_gene | is_pseudo=false	0	4.627	7	1	5	1	162	18.4	6.83	4.53	1	0.605	0.406	-0.73	-1.3	0.0597163	0.0400072	0.385065	0.268715	17.18	46.66	-0.73	-0.88	0.91	-6.64	-0.75	-1.3	180236	76358.6	166058	61.43	17.49	40.64	180236	79073.6	312620		86468.6	67430.7	122570	78679.1	74160.3	298054	145919	166058
FALSE	High	Master Protein	TGGT1_230160-t26_1-p1	transcript=TGGT1_230160-t26_1 | gene=TGGT1_230160 | organism=Toxoplasma_gondii_GT1 | gene_product=hypothetical protein | transcript_product=hypothetical protein | location=TGGT1_chrVIII:647435-648305(-) | protein_length=142 | sequence_SO=chromosome | SO=protein_coding_gene | is_pseudo=false	0	4.598	25	2	2	2	142	15.8	6.18	0	2	1	0.983	0	-0.02	0.691349	0.761991	0.971725	0.977969	4.86	1.37	-0.05	0	0.12	-0.02	-0.01	-0.74	322463	189823	203128	6.35	73.36	6.66	335961	322463	296195	189823	285802	37166.8	136898	223491	197068	203128	318724	374038
FALSE	High	Master Protein	TGGT1_312840-t26_1-p1	transcript=TGGT1_312840-t26_1 | gene=TGGT1_312840 | organism=Toxoplasma_gondii_GT1 | gene_product=WD_REPEATS_REGION domain-containing protein [Source:UniProtKB/TrEMBL;Acc:S7USM1] | transcript_product=hypothetical protein | location=TGGT1_chrXI:2903836-2912150(+) | protein_length=1112 | sequence_SO=chromosome | SO=protein_coding_gene | is_pseudo=false	0	4.556	2	1	5	1	1112	120.3	8.97	0	1	5.21	0.01	2.38	-6.64	7.35335e-06	1e-17	0.000227954	2.015e-16	25.34	0	2.38	2.11	6.64	-6.64	-6.64	6.64	110872	14875	28646	48.52		40.84	110872	166573	58059.5			14875	14467.6	59470.7		31300	25004.2
FALSE	High	Master Protein	TGGT1_313970-t26_1-p1	transcript=TGGT1_313970-t26_1 | gene=TGGT1_313970 | organism=Toxoplasma_gondii_GT1 | gene_product=Phytanoyl-CoA dioxygenase (PhyH) superfamily protein [Source:UniProtKB/TrEMBL;Acc:S7UU29] | transcript_product=Phytanoyl-CoA dioxygenase (PhyH) superfamily protein | location=TGGT1_chrXI:3806383-3814493(+) | protein_length=890 | sequence_SO=chromosome | SO=protein_coding_gene | is_pseudo=false	0	4.533	3	1	3	1	890	96	8.6	0	1	0.847	0.807	-0.24	-0.31	0.375333	0.824075	0.949873	0.987776	48.8	8.79	-1.33	-0.24	0.34	-0.22	-0.31	-1.15	33669.8	32089.5	39747.5	63.48	20.67	13.65	14960.3	33669.8	61135.2	32281	32089.5	21892.4	15800.2	39747.5	19292.2	37615.2	46580.7	102929
FALSE	High	Master Protein	TGGT1_221390-t26_1-p1	transcript=TGGT1_221390-t26_1 | gene=TGGT1_221390 | organism=Toxoplasma_gondii_GT1 | gene_product=hypothetical protein | transcript_product=hypothetical protein | location=TGGT1_chrII:286177-292066(-) | protein_length=875 | sequence_SO=chromosome | SO=protein_coding_gene | is_pseudo=false	0	4.496	3	2	2	2	875	96.4	5.25	0	2	0.376	0.995	-1.41	-0.01	0.00100048	0.736977	0.0175302	0.976829	30.91	6.43	-1.41	-0.32	-1.69	-0.89	-0.01	0.06	32503.7	46811.2	75362.1	22.81	61.62	42.88	32503.7	37412.6	23423.9	46811.2	46498.6	123952	120600	103478	171454	33870.7	36960.3	75362.1
[truncated: 218 more rows]
[truncated: 35 more columns]

## Sheet: 8_IPs_306920
Checked	Protein FDR Confidence: Combined	Master	Accession	Description	Exp. q-value: Combined	Sum PEP Score	Coverage [%]	# Peptides	# PSMs	# Unique Peptides	# AAs	MW [kDa]	calc. pI	Score Sequest HT: Sequest HT	# Peptides (by Search Engine): Sequest HT	Abundance Ratio: (tgAWC028) / (TIR1)	Abundance Ratio (log2): (tgAWC028) / (TIR1)	Abundance Ratio P-Value: (tgAWC028) / (TIR1)	Abundance Ratio Adj. P-Value: (tgAWC028) / (TIR1)	Abundance Ratio Variability [%]: (tgAWC028) / (TIR1)	Abundances (Grouped): tgAWC028	Abundances (Grouped): TIR1	Abundances (Grouped) CV [%]: tgAWC028	Abundances (Grouped) CV [%]: TIR1	Found in Sample: [S1] F1: Sample, R1, tgAWC028	Found in Sample: [S3] F3: Sample, R2, tgAWC028	Found in Sample: [S2] F2: Sample, R1, TIR1	Found in Sample: [S4] F4: Sample, R2, TIR1	# Protein Groups	Modifications
[truncated: 1,606 more rows]
