# Supplementary material for: Analysis of CDPK1 targets identifies a trafficking adaptor complex that regulates microneme exocytosis in Toxoplasma
Source: eLife. 2023 Nov 7;12:RP85654. doi: 10.7554/eLife.85654 (PMC10629828; doi:10.7554/eLife.85654)
Supplement: Supplementary file 9. [file elife-85654-supp9.xlsx]

## Sheet: 9_TurboID_FTS_RAW
Checked	Protein FDR Confidence: Combined	Master	Accession	Description	Exp. q-value: Combined	Sum PEP Score	Coverage [%]	# Peptides	# PSMs	# Unique Peptides	# AAs	MW [kDa]	calc. pI	Score Sequest HT: Sequest HT	# Peptides (by Search Engine): Sequest HT	Abundance Ratio: (tgALH184, BIOTIN) / (tgALH184, DMSO)	Abundance Ratio: (tgAWC026, BIOTIN) / (tgALH184, BIOTIN)	Abundance Ratio: (tgAWC026, BIOTIN) / (tgALH184, DMSO)	Abundance Ratio: (tgALH184, BIOTIN) / (tgAWC026, DMSO)	Abundance Ratio: (tgAWC026, BIOTIN) / (tgAWC026, DMSO)	Abundance Ratio P-Value: (tgALH184, BIOTIN) / (tgALH184, DMSO)	Abundance Ratio P-Value: (tgAWC026, BIOTIN) / (tgALH184, BIOTIN)	Abundance Ratio P-Value: (tgAWC026, BIOTIN) / (tgALH184, DMSO)	Abundance Ratio P-Value: (tgALH184, BIOTIN) / (tgAWC026, DMSO)	Abundance Ratio P-Value: (tgAWC026, BIOTIN) / (tgAWC026, DMSO)	Abundance Ratio Adj. P-Value: (tgALH184, BIOTIN) / (tgALH184, DMSO)	Abundance Ratio Adj. P-Value: (tgAWC026, BIOTIN) / (tgALH184, BIOTIN)	Abundance Ratio Adj. P-Value: (tgAWC026, BIOTIN) / (tgALH184, DMSO)	Abundance Ratio Adj. P-Value: (tgALH184, BIOTIN) / (tgAWC026, DMSO)	Abundance Ratio Adj. P-Value: (tgAWC026, BIOTIN) / (tgAWC026, DMSO)	Abundance Ratio Variability [%]: (tgALH184, BIOTIN) / (tgALH184, DMSO)	Abundance Ratio Variability [%]: (tgAWC026, BIOTIN) / (tgALH184, BIOTIN)	Abundance Ratio Variability [%]: (tgAWC026, BIOTIN) / (tgALH184, DMSO)	Abundance Ratio Variability [%]: (tgALH184, BIOTIN) / (tgAWC026, DMSO)	Abundance Ratio Variability [%]: (tgAWC026, BIOTIN) / (tgAWC026, DMSO)	Abundance Ratios (by Bio. Rep.): (tgALH184, BIOTIN,R1) / (tgALH184, DMSO,R1)	Abundance Ratios (by Bio. Rep.): (tgALH184, BIOTIN,R2) / (tgALH184, DMSO,R2)	Abundance Ratios (by Bio. Rep.): (tgALH184, BIOTIN,R3) / (tgALH184, DMSO,R3)	Abundance Ratios (by Bio. Rep.): (tgAWC026, BIOTIN,R1) / (tgALH184, BIOTIN,R1)	Abundance Ratios (by Bio. Rep.): (tgAWC026, BIOTIN,R2) / (tgALH184, BIOTIN,R2)	Abundance Ratios (by Bio. Rep.): (tgAWC026, BIOTIN,R3) / (tgALH184, BIOTIN,R3)	Abundance Ratios (by Bio. Rep.): (tgAWC026, BIOTIN,R1) / (tgALH184, DMSO,R1)	Abundance Ratios (by Bio. Rep.): (tgAWC026, BIOTIN,R2) / (tgALH184, DMSO,R2)	Abundance Ratios (by Bio. Rep.): (tgAWC026, BIOTIN,R3) / (tgALH184, DMSO,R3)	Abundance Ratios (by Bio. Rep.): (tgALH184, BIOTIN,R1) / (tgAWC026, DMSO,R1)	Abundance Ratios (by Bio. Rep.): (tgALH184, BIOTIN,R2) / (tgAWC026, DMSO,R2)	Abundance Ratios (by Bio. Rep.): (tgALH184, BIOTIN,R3) / (tgAWC026, DMSO,R3)	Abundance Ratios (by Bio. Rep.): (tgAWC026, BIOTIN,R1) / (tgAWC026, DMSO,R1)	Abundance Ratios (by Bio. Rep.): (tgAWC026, BIOTIN,R2) / (tgAWC026, DMSO,R2)
FALSE	Medium	Master Protein	TGGT1_218730-t26_1-p1	transcript=TGGT1_218730-t26_1 | gene=TGGT1_218730 | organism=Toxoplasma_gondii_GT1 | gene_product=hypothetical protein | transcript_product=hypothetical protein | location=TGGT1_chrXII:1285339-1286622(+) | protein_length=256 | sequence_SO=chromosome | SO=protein_coding_gene | is_pseudo=false	0.013	2.525	6	1	1	1	256	27.5	7.53	0	1	1.164	1.059	1.233	100	100	0.29561	0.451176	0.325294	1e-17	1e-17	0.825551	0.8874	0.877851	1.03865e-16	1.03758e-16	73.62	11.35	96.73	0	0	1.164	100	0.586	1.059	1.14	0.731	1.233	100	0.429	100	1.056	100	100	1.205
FALSE	Low	Master Protein	TGGT1_268580-t26_1-p1	transcript=TGGT1_268580-t26_1 | gene=TGGT1_268580 | organism=Toxoplasma_gondii_GT1 | gene_product=hypothetical protein | transcript_product=hypothetical protein | location=TGGT1_chrVIII:6413342-6418361(-) | protein_length=476 | sequence_SO=chromosome | SO=protein_coding_gene | is_pseudo=false	0.068	1.637	3	1	1	1	476	53.6	6.89	0	1	1.12	0.714	0.73	1.366	0.89	0.418404	0.840502	0.940593	0.882843	0.481893	0.913831	0.957445	0.993783	0.986633	0.840979	58.63	5.27	54.74	28.56	13.37	1.563	1.12	0.639	0.741	0.652	0.714	1.157	0.73	0.456	1.103	1.366	100	0.817	0.89
FALSE	Medium	Master Protein	TGGT1_255210-t26_1-p1	transcript=TGGT1_255210-t26_1 | gene=TGGT1_255210 | organism=Toxoplasma_gondii_GT1 | gene_product=ATPase_AAA_core domain-containing protein [Source:UniProtKB/TrEMBL;Acc:S7V2E7] | transcript_product=ATPase, AAA family protein | location=TGGT1_chrVIIb:4908202-4913433(+) | protein_length=647 | sequence_SO=chromosome | SO=protein_coding_gene | is_pseudo=false	0.035	1.935	2	1	1	1	647	69.8	7.01	0	1	0.371	1.443	0.657	0.43	0.127	2.43163e-09	0.0577769	0.773332	0.00333491	1e-17	3.93736e-08	0.332599	0.972757	0.0248723	1.03758e-16	110.11	33.47	101.5	115.12	118.01	1.443	0.093	0.371	1.443	0.01	1.769	2.082	0.01	0.657	0.43	1.926	0.072	0.621	0.01
FALSE	High	Master Protein	TGGT1_289970-t26_1-p1	transcript=TGGT1_289970-t26_1 | gene=TGGT1_289970 | organism=Toxoplasma_gondii_GT1 | gene_product=hypothetical protein | transcript_product=hypothetical protein | location=TGGT1_chrIX:3366173-3367777(+) | protein_length=232 | sequence_SO=chromosome | SO=protein_coding_gene | is_pseudo=false	0	7.776	11	2	13	2	232	24.5	11.66	21	2	0.676	1.175	0.929	0.889	0.612	0.021933	0.171025	0.679899	0.317535	0.00540168	0.174222	0.631139	0.945617	0.863411	0.03211	74.9	62.42	26.97	42.64	25.79	1.365	0.676	0.408	0.681	1.681	1.175	0.929	1.136	0.479	1.248	0.889	0.521	0.521	1.494
FALSE	High	Master Protein	TGGT1_259660-t26_1-p1	transcript=TGGT1_259660-t26_1 | gene=TGGT1_259660 | organism=Toxoplasma_gondii_GT1 | gene_product=Pribosyltran domain-containing protein [Source:UniProtKB/TrEMBL;Acc:A0A125YGM4] | transcript_product=orotate phosphoribosyltransferase | location=TGGT1_chrVIIb:2701843-2703611(-) | protein_length=283 | sequence_SO=chromosome | SO=protein_coding_gene | is_pseudo=false	0	6.723	11	3	4	3	283	31.6	6	1.7	3	1.043	0.691	0.75	1.418	0.943	0.707554	0.759936	0.984513	0.804193	0.643282	0.973495	0.943561	0.995031	0.980284	0.897666	13.94	55.6	37.47	32.74	33.8	0.778	1.043	1.141	1.105	0.691	0.464	1.004	0.75	0.599	1.105	1.418	1.784	1.221	0.943
FALSE	High	Master Protein	TGGT1_258230-t26_1-p1	transcript=TGGT1_258230-t26_1 | gene=TGGT1_258230 | organism=Toxoplasma_gondii_GT1 | gene_product=Protein kinase domain-containing protein [Source:UniProtKB/TrEMBL;Acc:S7WET0] | transcript_product=rhoptry kinase family protein ROP20 | location=TGGT1_chrVIIb:3456955-3458613(-) | protein_length=552 | sequence_SO=chromosome | SO=protein_coding_gene | is_pseudo=false	0	11.111	9	4	5	4	552	61	8.18	3.85	4	0.99	0.8	0.614	100	100	0.955709	0.936219	0.672382	1e-17	1e-17	0.989188	0.979189	0.945617	1.03865e-16	1.03758e-16	19.28	92.01	22.1	0	0	1.138	0.99	0.768	0.47	2.108	0.8	0.535	1.145	0.614	100	1.36	100	100	2.405
FALSE	High	Master Protein	TGGT1_203980-t26_1-p1	transcript=TGGT1_203980-t26_1 | gene=TGGT1_203980 | organism=Toxoplasma_gondii_GT1 | gene_product=hypothetical protein | transcript_product=hypothetical protein | location=TGGT1_chrVIIa:1963789-1975923(+) | protein_length=1920 | sequence_SO=chromosome | SO=protein_coding_gene | is_pseudo=false	0.002	3.992	1	2	3	2	1920	201.3	5.44	0	2	0.873	0.419	0.31	100	100	0.473363	0.0986884	0.0716126	1e-17	1e-17	0.939797	0.474368	0.431951	1.03865e-16	1.03758e-16	30.22	27.87	9.1	0	0	1.097	0.873	0.602	0.419	0.335	0.516	0.459	0.292	0.31	100	2.963	100	100	0.992
FALSE	Low	Master Protein	TGGT1_238420-t26_1-p1	transcript=TGGT1_238420-t26_1 | gene=TGGT1_238420 | organism=Toxoplasma_gondii_GT1 | gene_product=hypothetical protein | transcript_product=hypothetical protein | location=TGGT1_chrVI:224627-231222(+) | protein_length=1571 | sequence_SO=chromosome | SO=protein_coding_gene | is_pseudo=false	0.055	1.72	3	1	1	1	1571	170.5	7.97	0	1
FALSE	High	Master Protein	TGGT1_226068-t26_1-p1	transcript=TGGT1_226068-t26_1 | gene=TGGT1_226068 | organism=Toxoplasma_gondii_GT1 | gene_product=J domain-containing protein [Source:UniProtKB/TrEMBL;Acc:S7W5E1] | transcript_product=DnaJ domain-containing protein | location=TGGT1_chrX:1736740-1742707(-) | protein_length=443 | sequence_SO=chromosome | SO=protein_coding_gene | is_pseudo=false	0	11.819	12	4	7	4	443	50.1	5.08	2.37	4	0.952	0.906	1.053	1.325	1.261	0.852039	0.586528	0.506006	0.946995	0.376846	0.985103	0.91465	0.926268	0.995636	0.75812	10.68	23.16	14.08	11.56	40.63	0.888	1.466	0.952	0.906	0.748	1.073	0.699	1.053	1.153	1.325	1.222	1.857	1.261	0.916
FALSE	High	Master Protein	TGGT1_232350-t26_1-p1	transcript=TGGT1_232350-t26_1 | gene=TGGT1_232350 | organism=Toxoplasma_gondii_GT1 | gene_product=Lactate dehydrogenase LDH1 [Source:UniProtKB/TrEMBL;Acc:A0A125YWC8] | transcript_product=lactate dehydrogenase LDH1 | location=TGGT1_chrVIII:2023599-2025126(+) | protein_length=329 | sequence_SO=chromosome | SO=protein_coding_gene | is_pseudo=false	0	53.856	50	12	95	12	329	35.5	6.38	152.85	12	0.876	0.515	0.321	2.257	0.985	0.483966	0.119247	0.0834738	0.136577	0.642499	0.941301	0.523344	0.47556	0.61009	0.897666	24.19	11.57	51.74	42.83	130.18	0.602	1.046	0.876	0.559	0.1	0.515	0.321	0.095	0.494	1.605	2.257	15.682	0.985	0.273
FALSE	High	Master Protein	TGGT1_218720-t26_1-p1	transcript=TGGT1_218720-t26_1 | gene=TGGT1_218720 | organism=Toxoplasma_gondii_GT1 | gene_product=Calcium-dependent protein kinase CDPK6 [Source:UniProtKB/TrEMBL;Acc:S7V1C9] | transcript_product=calcium-dependent protein kinase CDPK6 | location=TGGT1_chrXII:1292458-1303855(+) | protein_length=1477 | sequence_SO=chromosome | SO=protein_coding_gene | is_pseudo=false	0	87.512	19	24	82	24	1477	160.6	8.76	79.14	24	1.158	0.953	1.22	1.139	1.304	0.311009	0.765788	0.335663	0.735911	0.258195	0.8432	0.943561	0.877851	0.969165	0.633279	4.54	14.27	20.87	39.83	19.16	1.158	0.966	1.193	0.953	2.205	0.869	1.22	1.974	1.048	1.445	0.658	1.139	1.515	1.304
FALSE	High	Master Protein	TGGT1_270050-t26_1-p1	transcript=TGGT1_270050-t26_1 | gene=TGGT1_270050 | organism=Toxoplasma_gondii_GT1 | gene_product=hypothetical protein | transcript_product=hypothetical protein | location=TGGT1_chrVIII:5442081-5443472(-) | protein_length=463 | sequence_SO=chromosome | SO=protein_coding_gene | is_pseudo=false	0	23.773	21	6	32	6	463	47.4	8.76	33.32	6	1.289	0.737	0.794	1.517	1.11	0.0938904	0.692286	0.923963	0.668969	0.840987	0.477678	0.931816	0.988479	0.964904	0.959846	4.56	7.09	9.53	7.03	2.46	1.289	1.066	1.329	0.703	1.341	0.737	0.746	1.301	0.794	1.589	1.139	1.517	1.092	1.386
FALSE	High	Master Protein	TGGT1_297960B-t26_1-p1	transcript=TGGT1_297960B-t26_1 | gene=TGGT1_297960B | organism=Toxoplasma_gondii_GT1 | gene_product=Rhoptry neck protein RON6 [Source:UniProtKB/TrEMBL;Acc:S7UJX5] | transcript_product=rhoptry neck protein RON6 | location=TGGT1_chrII:2107572-2113518(-) | protein_length=718 | sequence_SO=chromosome | SO=protein_coding_gene | is_pseudo=false	0	25.224	38	8	12	8	718	77.5	5.74	9.7	8	1.137	0.832	0.855	1.819	1.513	0.365662	0.759777	0.807143	0.361022	0.113743	0.885121	0.943561	0.973927	0.878176	0.377418	14.39	18.95	33.06	22.01	12.82	1.027	1.137	1.345	0.737	1.036	0.832	0.699	1.153	0.855	2.089	1.324	1.819	2.039	1.382
FALSE	High	Master Protein	TGGT1_231160-t26_1-p1	transcript=TGGT1_231160-t26_1 | gene=TGGT1_231160 | organism=Toxoplasma_gondii_GT1 | gene_product=hypothetical protein | transcript_product=hypothetical protein | location=TGGT1_chrVIII:1271630-1273190(+) | protein_length=178 | sequence_SO=chromosome | SO=protein_coding_gene | is_pseudo=false	0	20.414	28	2	23	2	178	18.3	5.08	43.34	2	1.36	0.629	0.656	1.267	0.802	0.0454948	0.338346	0.772085	0.95759	0.102641	0.301627	0.823825	0.972757	0.995636	0.357158	8.77	53.44	9.31	48.06	58.42	1.044	1.36	1.44	0.629	0.454	0.983	0.656	0.617	1.415	2.075	1.267	0.856	1.446	0.575
FALSE	High	Master Protein	TGGT1_295350-t26_1-p1	transcript=TGGT1_295350-t26_1 | gene=TGGT1_295350 | organism=Toxoplasma_gondii_GT1 | gene_product=Nucleoside diphosphate kinase [Source:UniProtKB/TrEMBL;Acc:A0A125YXT7] | transcript_product=putative nucleoside diphosphate kinase | location=TGGT1_chrIa:1794066-1795458(-) | protein_length=155 | sequence_SO=chromosome | SO=protein_coding_gene | is_pseudo=false	0	17.654	28	4	36	4	155	17.6	6.79	19.75	4	0.882	0.44	0.3	1.994	0.894	0.511134	0.0418139	0.0613555	0.246655	0.309186	0.942037	0.266738	0.384256	0.8046	0.689108	19.87	49.7	77.16	10.52	146.93	0.633	1.018	0.882	0.44	0.057	0.661	0.3	0.058	0.625	1.853	1.994	100	0.894	0.103
FALSE	High	Master Protein	TGGT1_227450-t26_1-p1	transcript=TGGT1_227450-t26_1 | gene=TGGT1_227450 | organism=Toxoplasma_gondii_GT1 | gene_product=Nudix hydrolase domain-containing protein [Source:UniProtKB/TrEMBL;Acc:S7UXE1] | transcript_product=hydrolase, NUDIX family protein | location=TGGT1_chrX:834070-841020(+) | protein_length=2063 | sequence_SO=chromosome | SO=protein_coding_gene | is_pseudo=false	0	49.885	11	20	41	20	2063	216.5	8.31	16.33	20	1.264	0.83	1.19	1.55	1.308	0.120642	0.976005	0.361839	0.626677	0.274151	0.55786	0.995734	0.89526	0.949833	0.645854	19.89	29.06	5.94	20.35	14.91	1.433	1.264	1.031	0.83	1.033	0.606	1.19	1.238	0.576	1.55	1.338	1.9	1.308	1.591
FALSE	High	Master Protein	TGGT1_224220-t26_1-p1	transcript=TGGT1_224220-t26_1 | gene=TGGT1_224220 | organism=Toxoplasma_gondii_GT1 | gene_product=Serine/threonine-protein phosphatase [Source:UniProtKB/TrEMBL;Acc:S7UWK0] | transcript_product=serine/threonine-protein phosphatase PP2A catalytic subunit | location=TGGT1_chrX:3121213-3124971(+) | protein_length=347 | sequence_SO=chromosome | SO=protein_coding_gene | is_pseudo=false	0.008	2.82	6	1	1	1	347	39.1	5.31	0	1	100	1	100	1.764	1	1e-17	0.518373	1e-17	0.406016	0.727018	1.73608e-16	0.91465	1.34062e-16	0.904455	0.932254	0	7412.26	0	0	7412.26			100		100	0.01		100				1.764		100
FALSE	High	Master Protein	TGGT1_258580-t26_1-p1	transcript=TGGT1_258580-t26_1 | gene=TGGT1_258580 | organism=Toxoplasma_gondii_GT1 | gene_product=Protein kinase domain-containing protein [Source:UniProtKB/TrEMBL;Acc:S7W7J7] | transcript_product=rhoptry protein ROP17 | location=TGGT1_chrVIIb:3287362-3289188(-) | protein_length=608 | sequence_SO=chromosome | SO=protein_coding_gene | is_pseudo=false	0	94.217	48	21	133	21	608	69	9.57	173.29	21	0.953	0.942	0.877	1.074	1.115	0.855791	0.792457	0.767502	0.620943	0.809192	0.985103	0.945424	0.972757	0.947999	0.957483	25.71	20.82	26.52	6.25	26.13	1.217	0.953	0.812	0.826	1.377	0.942	1.068	0.877	0.73	1.074	1.029	1.121	0.919	1.317
FALSE	High	Master Protein	TGGT1_308090-t26_1-p1	transcript=TGGT1_308090-t26_1 | gene=TGGT1_308090 | organism=Toxoplasma_gondii_GT1 | gene_product=Protein kinase domain-containing protein [Source:UniProtKB/TrEMBL;Acc:A0A125YX85] | transcript_product=rhoptry protein ROP5 | location=AAQM03000031:206-1855(-) | protein_length=549 | sequence_SO=contig | SO=protein_coding_gene | is_pseudo=false	0	124.618	49	24	291	10	549	60.7	9.25	461.77	24	0.912	0.493	0.537	1.922	0.835	0.653053	0.0911033	0.488368	0.289458	0.160601	0.965361	0.450528	0.926268	0.846378	0.478351	23.45	28.19	10.84	28.43	45.74	0.788	0.912	1.166	0.609	0.346	0.493	0.537	0.303	0.58	1.553	1.922	7.719	0.835	0.638
FALSE	High	Master Protein	TGGT1_216590-t26_1-p1	transcript=TGGT1_216590-t26_1 | gene=TGGT1_216590 | organism=Toxoplasma_gondii_GT1 | gene_product=Importin N-terminal domain-containing protein [Source:UniProtKB/TrEMBL;Acc:S7UM02] | transcript_product=HEAT repeat-containing protein | location=TGGT1_chrXI:5982217-5988765(-) | protein_length=1010 | sequence_SO=chromosome | SO=protein_coding_gene | is_pseudo=false	0	20.234	8	7	18	7	1010	111.1	5.14	15.15	7	0.825	0.941	0.857	1.559	1.291	0.287657	0.577282	0.803003	0.615822	0.315767	0.812776	0.91465	0.973927	0.947081	0.695743	1.32	0.28	22.46	19.52	6.93	0.818	0.825	1.212	0.941	0.943	0.47	0.857	1.01	0.629	1.559	1.354	2.018	1.291	1.231
FALSE	High	Master Protein	TGGT1_294010-t26_1-p1	transcript=TGGT1_294010-t26_1 | gene=TGGT1_294010 | organism=Toxoplasma_gondii_GT1 | gene_product=YrdC-like domain-containing protein [Source:UniProtKB/TrEMBL;Acc:S7UIN8] | transcript_product=yrdC domain-containing protein | location=TGGT1_chrIa:626587-630046(-) | protein_length=828 | sequence_SO=chromosome | SO=protein_coding_gene | is_pseudo=false	0	6.319	3	2	2	2	828	86.9	5.86	3.23	2	1.321	1.048	1.027	2.029	13.745	0.0684906	0.42582	0.539007	0.228146	9.32587e-15	0.377254	0.873007	0.926406	0.781665	9.3917e-14	55.97	68.23	44.9	43.4	529.15	1.321	0.822	1.883	1.048	1.893	0.566	1.384		0.762	2.029	1.435	100	1.889
FALSE	High	Master Protein	TGGT1_246990-t26_1-p1	transcript=TGGT1_246990-t26_1 | gene=TGGT1_246990 | organism=Toxoplasma_gondii_GT1 | gene_product=hypothetical protein | transcript_product=hypothetical protein | location=TGGT1_chrXII:3006642-3012374(+) | protein_length=544 | sequence_SO=chromosome | SO=protein_coding_gene | is_pseudo=false	0	22.978	17	7	12	7	544	58.6	9.99	13.3	7	1.117	1.7	1.179	0.699	0.929	0.425986	0.0164256	0.371206	0.101097	0.557764	0.919692	0.128705	0.89526	0.504456	0.86452	34.68	15.68	26.8	30.09	20.36	0.514	1.117	1.379	1.88	1.7	1.091	0.966	2.108	1.179	0.494	0.699	0.877	0.929	1.137
FALSE	High	Master Protein	TGGT1_212880-t26_1-p1	transcript=TGGT1_212880-t26_1 | gene=TGGT1_212880 | organism=Toxoplasma_gondii_GT1 | gene_product=Surface antigen repeat-containing protein [Source:UniProtKB/TrEMBL;Acc:S7UPM6] | transcript_product=surface antigen repeat-containing protein | location=TGGT1_chrV:528602-556929(-) | protein_length=6672 | sequence_SO=chromosome | SO=protein_coding_gene | is_pseudo=false	0	346.263	21	119	185	119	6672	762.1	5.4	169.98	119	1.041	1.026	1.144	1.018	1.163	0.719659	0.601683	0.405491	0.524595	0.630816	0.973495	0.91465	0.901174	0.930964	0.897666	6.77	1.03	4.14	32.42	10.22	1.342	0.993	1.041	1.019	1.832	1.026	1.144	1.768	1.112	1.316	0.796	1.018	1.163	1.531
FALSE	Medium	Master Protein	TGGT1_261600-t26_1-p1	transcript=TGGT1_261600-t26_1 | gene=TGGT1_261600 | organism=Toxoplasma_gondii_GT1 | gene_product=Creatinase domain-containing protein [Source:UniProtKB/TrEMBL;Acc:S7UYL7] | transcript_product=creatinase domain-containing protein | location=TGGT1_chrVIIb:1611032-1618860(+) | protein_length=886 | sequence_SO=chromosome | SO=protein_coding_gene | is_pseudo=false	0.016	2.374	1	1	1	1	886	96.1	7.65	0	1	0.083	1.005	0.084	1	1	1e-17	0.585578	8.6846e-06	0.49359	0.707635	1.73608e-16	0.91465	9.67712e-05	0.915333	0.924787	610.09	0	611.52	7412.26	7412.26	0.01		0.697			1.005	0.01		0.7		0.01	100		0.01
FALSE	High	Master Protein	TGGT1_311430-t26_1-p1	transcript=TGGT1_311430-t26_1 | gene=TGGT1_311430 | organism=Toxoplasma_gondii_GT1 | gene_product=Fibrillarin [Source:UniProtKB/TrEMBL;Acc:S7UTZ7] | transcript_product=fibrillarin | location=TGGT1_chrXI:2031325-2032910(-) | protein_length=303 | sequence_SO=chromosome | SO=protein_coding_gene | is_pseudo=false	0	77.631	47	15	131	15	303	31.9	10.29	177.82	15	1.027	0.762	1.18	1.111	1.185	0.779298	0.707287	0.370398	0.686079	0.55786	0.979507	0.933509	0.89526	0.9684	0.86452	13.67	10.59	14.94	22.98	12.8	1.286	1.027	0.933	0.711	1.364	0.762	1.18	1.299	0.679	1.111	0.939	1.669	1.083	1.185
FALSE	High	Master Protein	TGGT1_235880-t26_1-p1	transcript=TGGT1_235880-t26_1 | gene=TGGT1_235880 | organism=Toxoplasma_gondii_GT1 | gene_product=Mitochondrial pyruvate carrier [Source:UniProtKB/TrEMBL;Acc:S7URG4] | transcript_product=brain protein 44 family protein | location=TGGT1_chrX:5003314-5003796(+) | protein_length=160 | sequence_SO=chromosome | SO=protein_coding_gene | is_pseudo=false	0.001	4.971	10	2	10	2	160	17.7	9.52	11.33	2	1.084	0.83	0.801	1.001	0.843	0.541359	0.792965	0.90987	0.495855	0.309122	0.942037	0.945424	0.985048	0.915333	0.689108	7.94	25.05	5.98	49.98	2.15	0.63	1.142	1.084	1.271	0.83	0.71	0.801	0.937	0.77	0.664	1.001	1.598	0.843	0.831
FALSE	High	Master Protein	TGGT1_230350-t26_1-p1	transcript=TGGT1_230350-t26_1 | gene=TGGT1_230350 | organism=Toxoplasma_gondii_GT1 | gene_product=hypothetical protein | transcript_product=hypothetical protein | location=TGGT1_chrVIII:718292-730284(-) | protein_length=1254 | sequence_SO=chromosome | SO=protein_coding_gene | is_pseudo=false	0	8.437	3	3	8	3	1254	139	6.11	1.77	3	0.744	0.697	0.438	1.236	0.88	0.0898858	0.781274	0.268891	0.904816	0.446033	0.46061	0.943561	0.843541	0.987717	0.816001	7.76	48.2	12.56	59.73	87.23	0.744	1.062	0.707	1.032	0.413	0.697	0.811	0.438	0.404	0.738	1.236	3.068	0.88	0.504
FALSE	High	Master Protein	TGGT1_230850-t26_1-p1	transcript=TGGT1_230850-t26_1 | gene=TGGT1_230850 | organism=Toxoplasma_gondii_GT1 | gene_product=hypothetical protein | transcript_product=hypothetical protein | location=TGGT1_chrVIII:1056415-1058913(+) | protein_length=476 | sequence_SO=chromosome | SO=protein_coding_gene | is_pseudo=false	0	91.149	40	20	181	20	476	50.5	8.25	287.76	20	1.112	0.912	1.176	1.502	1.33	0.444511	0.869628	0.374152	0.687921	0.214745	0.924143	0.971047	0.89526	0.9684	0.572654	24.71	25.54	41.69	45.87	5.58	1.409	1.112	0.926	0.778	1.52	0.912	1.176	1.507	0.707	1.967	0.881	1.502	1.564	1.28
FALSE	High	Master Protein	TGGT1_263710-t26_1-p1	transcript=TGGT1_263710-t26_1 | gene=TGGT1_263710 | organism=Toxoplasma_gondii_GT1 | gene_product=O-acyltransferase [Source:UniProtKB/TrEMBL;Acc:A0A125YIA6] | transcript_product=acyl-CoA:cholesterol acyltransferase alpha ACAT1-alpha | location=TGGT1_chrVIIb:346380-356116(-) | protein_length=650 | sequence_SO=chromosome | SO=protein_coding_gene | is_pseudo=false	0.008	3.08	2	1	3	1	650	72.6	7.83	0	1	1.082	0.448	0.777	1.851	1.645	0.550098	0.167849	0.959056	0.337477	0.265482	0.946874	0.628883	0.994815	0.86944	0.64018	30.02	60.2	79.69	59.27	7.22	1.082	1.736	0.863	1.553	0.448	0.318	1.68	0.777	0.275	1.111	1.851	5.166	1.725	0.829
FALSE	High	Master Protein	TGGT1_308840-t26_1-p1	transcript=TGGT1_308840-t26_1 | gene=TGGT1_308840 | organism=Toxoplasma_gondii_GT1 | gene_product=SAG-related sequence SRS51 [Source:UniProtKB/TrEMBL;Acc:S7W107] | transcript_product=SAG-related sequence SRS51 | location=TGGT1_chrXI:258885-259967(+) | protein_length=360 | sequence_SO=chromosome | SO=protein_coding_gene | is_pseudo=false	0	11.165	16	3	11	3	360	38	6.2	12.39	3	0.816	0.648	0.502	1.492	0.977	0.255919	0.599072	0.407089	0.700995	0.623587	0.784092	0.91465	0.901174	0.96852	0.897666	6.14	14.01	55.1	11.66	79.63	0.616	0.816	0.851	0.648	0.138	0.716	0.502	0.14	0.799	1.375	1.492	3.426	0.977	0.185
FALSE	High	Master Protein	TGGT1_258070-t26_1-p1	transcript=TGGT1_258070-t26_1 | gene=TGGT1_258070 | organism=Toxoplasma_gondii_GT1 | gene_product=hypothetical protein | transcript_product=hypothetical protein | location=TGGT1_chrVIIb:3570890-3578893(-) | protein_length=678 | sequence_SO=chromosome | SO=protein_coding_gene | is_pseudo=false	0	23.156	16	8	27	8	678	75.7	8.73	38.44	8	1.163	1.141	1.242	0.975	1.407	0.296811	0.383675	0.318199	0.451573	0.124055	0.827405	0.843396	0.876091	0.915333	0.402239	3.31	42.23	46.74	20.04	27.64	1.189	1.163	1.104	1.141	1.665	0.816	1.242	2.161	0.85	0.859	0.975	1.831	1.105	1.669
FALSE	High	Master Protein	TGGT1_242830-t26_1-p1	transcript=TGGT1_242830-t26_1 | gene=TGGT1_242830 | organism=Toxoplasma_gondii_GT1 | gene_product=Putative XRN 5'-3' exonuclease [Source:UniProtKB/TrEMBL;Acc:S7USI1] | transcript_product=putative XRN 5'-3' exonuclease | location=TGGT1_chrVI:2236328-2253106(-) | protein_length=2042 | sequence_SO=chromosome | SO=protein_coding_gene | is_pseudo=false	0.008	3.049	1	1	1	1	2042	223.7	8.06	0	1
FALSE	High	Master Protein	TGGT1_274190-t26_1-p1	transcript=TGGT1_274190-t26_1 | gene=TGGT1_274190 | organism=Toxoplasma_gondii_GT1 | gene_product=W2 domain-containing protein [Source:UniProtKB/TrEMBL;Acc:S7V3K4] | transcript_product=putative eukaryotic initiation factor 2B epsilon subunit | location=TGGT1_chrVIII:2932989-2940348(+) | protein_length=809 | sequence_SO=chromosome | SO=protein_coding_gene | is_pseudo=false	0	25.257	14	9	21	9	809	88.8	5.01	8.17	9	0.869	0.748	0.83	1.356	1.19	0.45641	0.835457	0.853091	0.898178	0.546824	0.93121	0.956163	0.977229	0.986633	0.86452	12.57	37.56	7.35	14.81	41.88	0.869	1.065	0.801	1.001	0.493	0.748	0.874	0.83	0.647	1.22	1.356	2.179	1.19	0.749
FALSE	High	Master Protein	TGGT1_267620-t26_1-p1	transcript=TGGT1_267620-t26_1 | gene=TGGT1_267620 | organism=Toxoplasma_gondii_GT1 | gene_product=Multi-pass transmembrane protein [Source:UniProtKB/TrEMBL;Acc:S7UGQ1] | transcript_product=multi-pass transmembrane protein | location=TGGT1_chrIX:346132-354477(+) | protein_length=508 | sequence_SO=chromosome | SO=protein_coding_gene | is_pseudo=false	0	19.484	17	7	14	7	508	57.6	5.69	7.84	7	1.152	1.133	0.987	1.229	0.782	0.324845	0.22499	0.593619	0.893975	0.117644	0.853416	0.714969	0.93387	0.986633	0.386577	5.53	18.23	7.06	29.85	24.68	1.195	0.86	1.152	1.272	1.133	0.856	0.942	1.121	0.987	1.229	0.982	1.575	0.782	1.171
FALSE	High	Master Protein	TGGT1_306220-t26_1-p1	transcript=TGGT1_306220-t26_1 | gene=TGGT1_306220 | organism=Toxoplasma_gondii_GT1 | gene_product=hypothetical protein | transcript_product=hypothetical protein | location=TGGT1_chrIX:5617255-5624378(+) | protein_length=675 | sequence_SO=chromosome | SO=protein_coding_gene | is_pseudo=false	0	11.441	7	5	14	5	675	77.2	9.64	5.66	5	0.836	0.01	0.01	100	1.198	0.324726	1e-17	1e-17	1e-17	0.875439	0.853416	1.60374e-16	1.34062e-16	1.03865e-16	0.971323	1.64	0	0	0	0	0.836	0.845	0.759	0.01	0.106	0.01	0.01	0.09	0.01	100	9.769	100		1.198
FALSE	High	Master Protein	TGGT1_234270-t26_1-p1	transcript=TGGT1_234270-t26_1 | gene=TGGT1_234270 | organism=Toxoplasma_gondii_GT1 | gene_product=hypothetical protein | transcript_product=hypothetical protein | location=TGGT1_chrX:4150640-4163518(+) | protein_length=2027 | sequence_SO=chromosome | SO=protein_coding_gene | is_pseudo=false	0	65.665	17	23	39	23	2027	217.7	7.56	20.55	23	1.061	0.983	1.169	1.154	1.485	0.632597	0.695845	0.380482	0.762498	0.0613635	0.965361	0.932364	0.898096	0.971965	0.257486	29.86	21.12	26.49	13.52	7.89	1.411	0.847	1.061	0.86	1.519	0.983	1.378	1.169	0.936	1.397	1.049	1.154	1.485	1.565
FALSE	High	Master Protein	TGGT1_209290-t26_1-p1	transcript=TGGT1_209290-t26_1 | gene=TGGT1_209290 | organism=Toxoplasma_gondii_GT1 | gene_product=Ribosomal protein RPS28 [Source:UniProtKB/TrEMBL;Acc:S7UIH9] | transcript_product=ribosomal protein RPS28 | location=TGGT1_chrIb:1207027-1207383(-) | protein_length=118 | sequence_SO=chromosome | SO=protein_coding_gene | is_pseudo=false	0	7.175	21	2	17	2	118	13.2	10.76	23.31	2	1.019	0.691	0.894	1.116	1.054	0.818789	0.777201	0.737057	0.694987	0.930968	0.985103	0.943561	0.972757	0.9684	0.983838	92.02	40.82	0.19	92.96	48.24	0.354	1.651	1.019	2.533	0.542	0.691	0.896	0.894	0.704	0.416	1.116	2.022	1.054	0.604
FALSE	High	Master Protein	TGGT1_250340-t26_1-p1	transcript=TGGT1_250340-t26_1 | gene=TGGT1_250340 | organism=Toxoplasma_gondii_GT1 | gene_product=Centrin 2 [Source:UniProtKB/TrEMBL;Acc:S7V0C6] | transcript_product=centrin 2 | location=TGGT1_chrXII:4993747-4995535(-) | protein_length=170 | sequence_SO=chromosome | SO=protein_coding_gene | is_pseudo=false	0	16.938	42	6	13	6	170	19.1	4.67	4.29	6	0.876	1.194	0.886	1.166	1.093	0.485201	0.193642	0.752385	0.78292	0.935481	0.941301	0.672873	0.972757	0.971965	0.984886	44.74	23.03	6.82	3.47	63.37	0.533	1.254	0.876	1.194	0.492	1.379	0.886	0.488	0.928	0.97	1.193	1.166	1.093	0.57
FALSE	High	Master Protein	TGGT1_222020-t26_1-p1	transcript=TGGT1_222020-t26_1 | gene=TGGT1_222020 | organism=Toxoplasma_gondii_GT1 | gene_product=Phosphoglycerate kinase [Source:UniProtKB/TrEMBL;Acc:S7UL61] | transcript_product=phosphoglycerate kinase PGKII | location=TGGT1_chrII:744480-749627(+) | protein_length=593 | sequence_SO=chromosome | SO=protein_coding_gene | is_pseudo=false	0	48.663	25	15	50	15	593	62.9	8.34	53.33	15	0.937	1.09	1.14	1.028	1.038	0.77534	0.365328	0.408881	0.54156	0.882611	0.979499	0.833119	0.901174	0.934143	0.972975	23.54	38.18	4.41	3.66	1.12	1.63	0.937	0.808	0.685	1.37	1.09	1.14	1.174	0.658	1.378	1.003	1.028	1.03	1.474
FALSE	High	Master Protein	TGGT1_250830-t26_1-p1	transcript=TGGT1_250830-t26_1 | gene=TGGT1_250830 | organism=Toxoplasma_gondii_GT1 | gene_product=CSN8_PSD8_EIF3K domain-containing protein [Source:UniProtKB/TrEMBL;Acc:S7V0I3] | transcript_product=SAC3/GANP family protein | location=TGGT1_chrXII:5179299-5183301(+) | protein_length=376 | sequence_SO=chromosome | SO=protein_coding_gene | is_pseudo=false	0.002	3.866	6	2	3	2	376	41	5.44	1.92	2	1.092	0.83	1.003	1.279	1.474	0.511425	0.78492	0.57016	0.977529	0.0998341	0.942037	0.943561	0.926406	0.995636	0.348808	15.23	8.83	34.84	1.07	0.04	0.98	1.092	1.209	0.783	1.289	0.83	0.768	1.241	1.003	1.269	1.279	1.776	0.994	1.475
FALSE	High	Master Protein	TGGT1_286080-t26_1-p1	transcript=TGGT1_286080-t26_1 | gene=TGGT1_286080 | organism=Toxoplasma_gondii_GT1 | gene_product=Tr-type G domain-containing protein [Source:UniProtKB/TrEMBL;Acc:S7UP08] | transcript_product=elongation factor 2 family protein | location=TGGT1_chrV:1864243-1874860(+) | protein_length=1008 | sequence_SO=chromosome | SO=protein_coding_gene | is_pseudo=false	0	26.322	12	8	16	8	1008	113.3	5.2	7.59	8	0.808	0.466	0.411	2.173	1.191	0.233194	0.158454	0.216628	0.165145	0.573707	0.756417	0.616224	0.796004	0.662537	0.871609	0	16.8	20.67	71.49	74.51	0.808	0.908	0.808	0.466	0.419	0.909	0.36	0.411	0.546	1.125	2.173	3.751	0.592	1.191
FALSE	High	Master Protein	TGGT1_201700-t26_1-p1	transcript=TGGT1_201700-t26_1 | gene=TGGT1_201700 | organism=Toxoplasma_gondii_GT1 | gene_product=WD_REPEATS_REGION domain-containing protein [Source:UniProtKB/TrEMBL;Acc:A0A125YTV7] | transcript_product=WD domain, G-beta repeat-containing protein | location=TGGT1_chrVIIa:3740764-3744193(-) | protein_length=654 | sequence_SO=chromosome | SO=protein_coding_gene | is_pseudo=false	0	16.181	13	5	11	5	654	67.4	7.47	17.76	5	1.145	0.532	0.588	1.652	0.879	0.345252	0.301967	0.609429	0.511883	0.391854	0.87471	0.793529	0.93387	0.921489	0.773261	10.92	5.07	26.45	1.81	62.39	1.006	1.145	1.229	0.532	0.301	0.551	0.588	0.409	0.716	1.652	1.632	2.793	0.879	0.471
FALSE	High	Master Protein	TGGT1_320570-t26_1-p1	transcript=TGGT1_320570-t26_1 | gene=TGGT1_320570 | organism=Toxoplasma_gondii_GT1 | gene_product=Tr-type G domain-containing protein [Source:UniProtKB/TrEMBL;Acc:S7UJX2] | transcript_product=putative elongation factor Tu | location=TGGT1_chrIV:197431-203338(+) | protein_length=586 | sequence_SO=chromosome | SO=protein_coding_gene | is_pseudo=false	0	5.354	8	3	4	3	586	63.5	6.05	0	3	0.848	1.415	1.248	1.194	1.382	0.368966	0.0651173	0.313603	0.831955	0.28296	0.886361	0.359908	0.875234	0.980849	0.654633	5.14	17.55	3.18	41.08	64.06	0.819	1.049	0.848	1.582	0.563	1.415	1.221		1.275	0.863	1.194	100	1.382	0.785
FALSE	High	Master Protein	TGGT1_204130-t26_1-p1	transcript=TGGT1_204130-t26_1 | gene=TGGT1_204130 | organism=Toxoplasma_gondii_GT1 | gene_product=MACPF domain-containing protein [Source:UniProtKB/TrEMBL;Acc:S7UUF6] | transcript_product=perforin-like protein PLP1 | location=TGGT1_chrVIIa:1864038-1872889(-) | protein_length=1161 | sequence_SO=chromosome | SO=protein_coding_gene | is_pseudo=false	0	72.554	24	21	85	21	1161	125.4	6.43	88.24	21	0.973	1.476	1.502	0.764	0.986	0.957772	0.1055	0.166708	0.16026	0.647033	0.989501	0.497355	0.709854	0.649091	0.897666	10.18	0.96	19.43	15.6	10.69	0.973	1.817	0.911	1.476	1.31	1.486	1.502	2.262	1.305	0.519	0.764	0.854	0.92	0.986
FALSE	High	Master Protein	TGGT1_261440-t26_1-p1	transcript=TGGT1_261440-t26_1 | gene=TGGT1_261440 | organism=Toxoplasma_gondii_GT1 | gene_product=ARM repeats containing protein [Source:UniProtKB/TrEMBL;Acc:A0A125YNN4] | transcript_product=ARM repeats containing protein | location=TGGT1_chrVIIb:1723817-1729239(+) | protein_length=274 | sequence_SO=chromosome | SO=protein_coding_gene | is_pseudo=false	0	5.781	7	2	6	2	274	30.5	5.11	0	2	0.898	0.54	0.44	2.253	1.218	0.583387	0.284693	0.271968	0.137601	0.652101	0.956627	0.779161	0.844018	0.61305	0.898562	12.1	29.62	27.92	29.47	49.41	0.685	0.977	0.898	0.54	0.45	0.826	0.37	0.44	0.741	2.253	1.806	5.001	1.218	0.812
FALSE	High	Master Protein	TGGT1_279330-t26_1-p1	transcript=TGGT1_279330-t26_1 | gene=TGGT1_279330 | organism=Toxoplasma_gondii_GT1 | gene_product=DEAD/DEAH box helicase family protein [Source:UniProtKB/TrEMBL;Acc:A0A125YGI8] | transcript_product=DEAD/DEAH box helicase family protein | location=TGGT1_chrIX:91625-95960(+) | protein_length=479 | sequence_SO=chromosome | SO=protein_coding_gene | is_pseudo=false	0	38.561	31	11	35	11	479	51.7	9.64	35.82	11	1.263	0.99	1.378	1.071	1.018	0.121391	0.678722	0.226692	0.61647	0.782406	0.55786	0.931816	0.812186	0.947081	0.945292	14.43	1.84	1.25	27.87	0.94	1.386	0.926	1.263	1.003	0.99	0.76	1.39	1.378	0.865	0.87	1.071	1.538	1.018	1.012
FALSE	High	Master Protein	TGGT1_316400B-t26_1-p1	transcript=TGGT1_316400B-t26_1 | gene=TGGT1_316400B | organism=Toxoplasma_gondii_GT1 | gene_product=Tubulin alpha chain [Source:UniProtKB/TrEMBL;Acc:S7UL74] | transcript_product=alpha tubulin TUBA1 | location=TGGT1_chrXI:5219470-5220918(+) | protein_length=432 | sequence_SO=chromosome | SO=protein_coding_gene | is_pseudo=false	0	272.886	72	32	1004	32	432	47.8	5.05	1987.4	32	1.198	0.61	0.774	1.358	1.06	0.221763	0.293846	0.965402	0.894709	0.963955	0.742444	0.784244	0.994815	0.986633	0.99392	4.93	12.18	2.12	21.83	8.42	1.198	1.044	1.237	0.563	0.922	0.61	0.763	1.086	0.774	1.719	1.158	1.358	1.121	1.06
FALSE	High	Master Protein	TGGT1_291930-t26_1-p1	transcript=TGGT1_291930-t26_1 | gene=TGGT1_291930 | organism=Toxoplasma_gondii_GT1 | gene_product=RNA recognition motif-containing protein [Source:UniProtKB/TrEMBL;Acc:S7W432] | transcript_product=RNA recognition motif-containing protein | location=TGGT1_chrIX:4212023-4217780(+) | protein_length=705 | sequence_SO=chromosome | SO=protein_coding_gene | is_pseudo=false	0	13.217	7	5	16	5	705	73.1	5.43	5.46	5	0.821	0.507	0.502	1.841	0.859	0.272878	0.243189	0.406332	0.34497	0.275016	0.800707	0.738772	0.901174	0.86944	0.645854	12.69	49.53	3.37	26.1	56.8	0.898	0.821	0.713	0.507	0.38	0.846	0.514	0.338	0.502	1.517	1.841	5.14	0.859	0.621
FALSE	High	Master Protein	TGGT1_315210-t26_1-p1	transcript=TGGT1_315210-t26_1 | gene=TGGT1_315210 | organism=Toxoplasma_gondii_GT1 | gene_product=Putative rhoptry protein [Source:UniProtKB/TrEMBL;Acc:S7ULH8] | transcript_product=putative rhoptry protein | location=TGGT1_chrXI:4519390-4526736(-) | protein_length=1010 | sequence_SO=chromosome | SO=protein_coding_gene | is_pseudo=false	0	8.604	4	4	8	4	1010	115.8	7.72	1.89	4	0.985	0.719	0.696	1.524	0.964	0.980215	0.819285	0.864983	0.659846	0.562804	0.994986	0.950701	0.981008	0.961377	0.865696	23.83	40.97	6.7	17.68	49.22	0.786	1.174	0.985	0.993	0.494	0.719	0.781	0.666	0.696	1.182	1.524	1.706	0.964	0.724
FALSE	High	Master Protein	TGGT1_257430-t26_1-p1	transcript=TGGT1_257430-t26_1 | gene=TGGT1_257430 | organism=Toxoplasma_gondii_GT1 | gene_product=hypothetical protein | transcript_product=hypothetical protein | location=TGGT1_chrVIIb:3984968-3993377(+) | protein_length=2250 | sequence_SO=chromosome | SO=protein_coding_gene | is_pseudo=false	0	92.827	16	29	90	29	2250	238.6	10.74	71.53	29	1.045	1.195	1.319	0.97	1.215	0.700757	0.326916	0.263026	0.444324	0.46682	0.973495	0.813471	0.83956	0.915333	0.830108	15.87	18.62	36.19	26.57	1.36	1.289	1.045	0.933	1.045	1.421	1.195	1.319	1.813	0.997	1.182	0.709	0.97	1.215	1.138
FALSE	Medium	Master Protein	TGGT1_225200-t26_1-p1	transcript=TGGT1_225200-t26_1 | gene=TGGT1_225200 | organism=Toxoplasma_gondii_GT1 | gene_product=hypothetical protein | transcript_product=hypothetical protein | location=TGGT1_chrX:2317721-2342258(+) | protein_length=1445 | sequence_SO=chromosome | SO=protein_coding_gene | is_pseudo=false	0.033	1.992	1	1	1	1	1445	158.2	8.9	0	1	100	100	100	1	100	1e-17	1e-17	1e-17	0.49359	1e-17	1.73608e-16	1.60374e-16	1.34062e-16	0.915333	1.03758e-16	0	0	0	7412.26	0	100			1.19	100	100	100	100	100	100	0.01		100	0.803
FALSE	Medium	Master Protein	TGGT1_222880-t26_1-p1	transcript=TGGT1_222880-t26_1 | gene=TGGT1_222880 | organism=Toxoplasma_gondii_GT1 | gene_product=hypothetical protein | transcript_product=hypothetical protein | location=TGGT1_chrII:1258376-1264820(+) | protein_length=729 | sequence_SO=chromosome | SO=protein_coding_gene | is_pseudo=false	0.021	2.215	1	1	6	1	729	80.1	8.91	2.25	1	0.958	2.09	2.078	0.725	1.182	0.880155	0.00386987	0.0415984	0.122443	0.592325	0.985103	0.0353229	0.285566	0.572639	0.884907	5.44	55.52	86.34	41.93	29.4	0.994	0.641	0.958	2.09	1.307	3.433	2.078	0.838	3.288	1.01	0.725	0.344	2.112	0.947
FALSE	High	Master Protein	TGGT1_219630-t26_1-p1	transcript=TGGT1_219630-t26_1 | gene=TGGT1_219630 | organism=Toxoplasma_gondii_GT1 | gene_product=Flavodoxin-like domain-containing protein [Source:UniProtKB/TrEMBL;Acc:A0A125YRL5] | transcript_product=flavodoxin domain-containing protein | location=TGGT1_chrXII:741441-752773(+) | protein_length=949 | sequence_SO=chromosome | SO=protein_coding_gene | is_pseudo=false	0	18.813	9	7	14	7	949	104.1	6.8	5.92	7	1.018	0.726	0.793	1.588	1.224	0.821748	0.933389	0.92673	0.582571	0.460253	0.985103	0.978434	0.989183	0.940113	0.82622	7.55	18.09	9.86	5.92	1.83	1.018	1.07	0.891	0.827	0.726	0.522	0.849	0.793	0.506	1.524	1.588	2.398	1.224	1.209
FALSE	High	Master Protein	TGGT1_267350-t26_1-p1	transcript=TGGT1_267350-t26_1 | gene=TGGT1_267350 | organism=Toxoplasma_gondii_GT1 | gene_product=Small nuclear ribonucleoprotein Sm D1 [Source:UniProtKB/TrEMBL;Acc:A0A125YGA0] | transcript_product=LSM domain-containing protein | location=TGGT1_chrIX:540789-541154(-) | protein_length=121 | sequence_SO=chromosome | SO=protein_coding_gene | is_pseudo=false	0	9.953	40	3	7	3	121	13.5	11.68	12.25	3	0.998	0.445	0.409	1.675	1.325	0.916866	0.111884	0.212816	0.48898	0.26535	0.985103	0.513348	0.788752	0.915333	0.64018	12.9	70.36	76.59	1.76	8.53	0.998	1.277	0.918	0.847	0.177	0.445	0.845	0.225	0.409	1.655	1.675	2.978	1.401	0.296
FALSE	Low	Master Protein	TGGT1_302003-t26_1-p1	transcript=TGGT1_302003-t26_1 | gene=TGGT1_302003 | organism=Toxoplasma_gondii_GT1 | gene_product=hypothetical protein | transcript_product=hypothetical protein | location=AAQM03000559:498-815(-) | protein_length=105 | sequence_SO=apicoplast_chromosome | SO=protein_coding_gene | is_pseudo=false	0.063	1.672	7	1	2	1	105	13.5	10.26	0	1	0.752	0.831	0.926	1.312	1.277	0.103008	0.850261	0.685183	0.967034	0.652338	0.507209	0.962211	0.945617	0.995636	0.898562	29.26	65.77	2.09	25.23	29.48	1.759	0.752	0.628	0.526	0.831	1.494	0.926	0.626	0.939	1.312	1.536	1.024	0.691	1.277
FALSE	High	Master Protein	TGGT1_310460-t26_1-p1	transcript=TGGT1_310460-t26_1 | gene=TGGT1_310460 | organism=Toxoplasma_gondii_GT1 | gene_product=Rab6 [Source:UniProtKB/TrEMBL;Acc:A0A125YYB6] | transcript_product=Rab6 | location=TGGT1_chrXI:1331540-1336504(+) | protein_length=209 | sequence_SO=chromosome | SO=protein_coding_gene | is_pseudo=false	0	10.584	19	4	14	4	209	23.5	5.73	12.79	4	0.886	1.101	0.921	0.954	1.519	0.530801	0.314904	0.692572	0.418109	0.0574379	0.942037	0.798919	0.949436	0.908675	0.247069	18.78	32.54	9.87	19.44	4.9	0.574	0.886	1.015	1.672	1.101	0.86	0.864	0.994	0.921	0.844	0.954	1.194	1.519	0.987
FALSE	Medium	Master Protein	TGGT1_293580-t26_1-p1	transcript=TGGT1_293580-t26_1 | gene=TGGT1_293580 | organism=Toxoplasma_gondii_GT1 | gene_product=Prefoldin subunit protein [Source:UniProtKB/TrEMBL;Acc:A0A125YPK4] | transcript_product=prefoldin subunit protein | location=TGGT1_chrIa:418038-419649(-) | protein_length=170 | sequence_SO=chromosome | SO=protein_coding_gene | is_pseudo=false	0.035	1.952	8	1	1	1	170	18.3	6.55	0	1	1.593	0.243	1.323	2.504	1.455	0.00295604	0.00410789	0.260221	0.0774085	0.489787	0.032116	0.037297	0.834653	0.424108	0.847134	85.35	129.82	104.8	93.91	34.76	0.676	100	1.593	1.957	0.126	0.243	1.323	100	0.388	0.918	2.504	5.977	1.796	0.316
FALSE	Medium	Master Protein	TGGT1_284010-t26_1-p1	transcript=TGGT1_284010-t26_1 | gene=TGGT1_284010 | organism=Toxoplasma_gondii_GT1 | gene_product=53EXOc domain-containing protein [Source:UniProtKB/TrEMBL;Acc:S7W2T4] | transcript_product=5'-3' exonuclease, N-terminal resolvase family domain-containing protein | location=TGGT1_chrV:2688069-2694758(+) | protein_length=1168 | sequence_SO=chromosome | SO=protein_coding_gene | is_pseudo=false	0.016	2.394	1	1	1	1	1168	125.3	9.83	1.62	1
FALSE	High	Master Protein	TGGT1_202380-t26_1-p1	transcript=TGGT1_202380-t26_1 | gene=TGGT1_202380 | organism=Toxoplasma_gondii_GT1 | gene_product=Rab GDP dissociation inhibitor [Source:UniProtKB/TrEMBL;Acc:A0A125YTR7] | transcript_product=putative rab GDI alpha | location=TGGT1_chrVIIa:3266429-3273830(+) | protein_length=456 | sequence_SO=chromosome | SO=protein_coding_gene | is_pseudo=false	0.001	4.547	6	2	2	2	456	51	5.76	0	2	0.756	0.564	0.385	1.688	0.61	0.108814	0.343066	0.171245	0.475659	0.024384	0.530711	0.82651	0.72008	0.915333	0.124613	3.15	26.27	40.49	43.77	147.36	0.682	0.756	0.772	0.564	0.01	0.685	0.385	0.01	0.529	1.19	1.688	100	0.61	0.01
FALSE	High	Master Protein	TGGT1_234505-t26_1-p1	transcript=TGGT1_234505-t26_1 | gene=TGGT1_234505 | organism=Toxoplasma_gondii_GT1 | gene_product=AA_TRNA_LIGASE_II domain-containing protein [Source:UniProtKB/TrEMBL;Acc:A0A125YPN5] | transcript_product=putative phenylalanyl-tRNA synthetase alpha chain A | location=TGGT1_chrX:4319172-4323950(+) | protein_length=525 | sequence_SO=chromosome | SO=protein_coding_gene | is_pseudo=false	0	14.469	13	6	13	6	525	59.3	7.4	6.33	6	0.793	0.47	0.433	1.934	0.609	0.191726	0.16255	0.258509	0.281403	0.00944478	0.685876	0.619856	0.834653	0.844306	0.0538982	5.22	4.76	2.76	45.09	77.27	0.793	0.766	1.032	0.485	0.143	0.47	0.441	0.13	0.433	1.346	1.934	2.773	0.609	0.269
FALSE	High	Master Protein	TGGT1_256090-t26_1-p1	transcript=TGGT1_256090-t26_1 | gene=TGGT1_256090 | organism=Toxoplasma_gondii_GT1 | gene_product=GP-PDE domain-containing protein [Source:UniProtKB/TrEMBL;Acc:A0A125YXI4] | transcript_product=glycerophosphodiester phosphodiesterase family protein | location=TGGT1_chrVIIb:4433438-4434541(+) | protein_length=367 | sequence_SO=chromosome | SO=protein_coding_gene | is_pseudo=false	0.002	3.635	3	1	4	1	367	41.6	6.28	2.9	1	1.093	0.515	0.563	2.773	1.552	0.510353	0.315234	0.549474	0.0414623	0.326508	0.942037	0.798919	0.926406	0.251598	0.708469	101.78	2.58	147.43	59.94	11.72	0.343	100	1.093	0.507	0.939	0.515	0.174	100	0.563	100	1.652	2.773	100	1.552
FALSE	High	Master Protein	TGGT1_270930-t26_1-p1	transcript=TGGT1_270930-t26_1 | gene=TGGT1_270930 | organism=Toxoplasma_gondii_GT1 | gene_product=hypothetical protein | transcript_product=hypothetical protein | location=TGGT1_chrVIII:4849808-4869937(-) | protein_length=3000 | sequence_SO=chromosome | SO=protein_coding_gene | is_pseudo=false	0	88.802	14	30	68	30	3000	316.9	8.94	56.39	30	1.035	0.701	0.927	1.657	1.223	0.742944	0.528514	0.683739	0.507276	0.442941	0.973495	0.91465	0.945617	0.919414	0.814516	3.45	49.09	14.1	7.36	2.38	1.449	1.011	1.035	0.701	1.047	0.432	0.927	1.024	0.498	1.657	1.574	2.215	1.223	1.613
FALSE	High	Master Protein	TGGT1_270380-t26_1-p1	transcript=TGGT1_270380-t26_1 | gene=TGGT1_270380 | organism=Toxoplasma_gondii_GT1 | gene_product=Ribosomal_S13_N domain-containing protein [Source:UniProtKB/TrEMBL;Acc:S7V498] | transcript_product=ribosomal protein RPS13 | location=TGGT1_chrVIII:5238468-5240728(-) | protein_length=151 | sequence_SO=chromosome | SO=protein_coding_gene | is_pseudo=false	0	21.233	39	5	33	5	151	17.2	10.55	27.89	5	0.701	1.136	0.823	1.275	1.448	0.0391216	0.408035	0.86639	0.971639	0.0842706	0.267644	0.865097	0.981008	0.995636	0.31708	26.95	53.71	16.15	12.42	68.19	0.701	1.015	0.593	1.136	0.605	1.547	0.823	0.628	0.924	1.275	1.168	1.464	1.448	0.705
FALSE	High	Master Protein	TGGT1_316540-t26_1-p1	transcript=TGGT1_316540-t26_1 | gene=TGGT1_316540 | organism=Toxoplasma_gondii_GT1 | gene_product=ISP1_C domain-containing protein [Source:UniProtKB/TrEMBL;Acc:A0A125YUT4] | transcript_product=IMC sub-compartment protein ISP3 | location=TGGT1_chrXI:5335579-5336073(-) | protein_length=164 | sequence_SO=chromosome | SO=protein_coding_gene | is_pseudo=false	0	11.257	32	4	13	4	164	18.4	5.27	0	4	0.915	0.379	0.493	1.817	0.633	0.665301	0.0474997	0.38516	0.363031	0.0128249	0.969107	0.288963	0.898096	0.878833	0.0710558	15.26	20.28	70.67	43.94	8.02	0.642	0.915	1.02	0.379	0.334	0.919	0.334	0.493	1.024	1.278	1.817	3.237	0.6	0.633
FALSE	High	Master Protein	TGGT1_273490-t26_1-p1	transcript=TGGT1_273490-t26_1 | gene=TGGT1_273490 | organism=Toxoplasma_gondii_GT1 | gene_product=Gln-synt_C domain-containing protein [Source:UniProtKB/TrEMBL;Acc:S7WJT1] | transcript_product=putative glutamine synthetase, type I | location=TGGT1_chrVIII:3443164-3448518(+) | protein_length=479 | sequence_SO=chromosome | SO=protein_coding_gene | is_pseudo=false	0	5.34	4	2	3	2	479	53.4	6.55	0	2	0.931	0.399	0.304	2.193	0.875	0.748044	0.061521	0.0651438	0.157809	0.439722	0.973495	0.346757	0.401315	0.647326	0.812963	44.11	45.33	89.14	17.78	146.96	0.457	0.931	1.326	0.399	0.154	0.575	0.304	0.109	0.762	2.193	1.93	100	0.875	0.254
FALSE	High	Master Protein	TGGT1_278850-t26_1-p1	transcript=TGGT1_278850-t26_1 | gene=TGGT1_278850 | organism=Toxoplasma_gondii_GT1 | gene_product=Palmitoyltransferase [Source:UniProtKB/TrEMBL;Acc:S7WFN0] | transcript_product=DHHC zinc finger domain-containing protein | location=TGGT1_chrXII:5737011-5740841(+) | protein_length=361 | sequence_SO=chromosome | SO=protein_coding_gene | is_pseudo=false	0.007	3.118	3	1	4	1	361	40.4	8.66	1.77	1	0.725	0.769	0.674	1.303	0.975	0.0632718	0.999207	0.813802	0.982135	0.694721	0.361186	0.999207	0.973927	0.995636	0.921624	28.86	3.99	18.73	12.36	9.24	0.725	0.9	0.41	0.769	0.749	1.879	0.557	0.674	0.771	1.195	1.303	2.432	0.918	0.975
FALSE	High	Master Protein	TGGT1_269840-t26_1-p1	transcript=TGGT1_269840-t26_1 | gene=TGGT1_269840 | organism=Toxoplasma_gondii_GT1 | gene_product=MPN domain-containing protein [Source:UniProtKB/TrEMBL;Acc:A0A125YUB2] | transcript_product=proteasome regulatory subunit | location=TGGT1_chrVIII:5579434-5582614(-) | protein_length=314 | sequence_SO=chromosome | SO=protein_coding_gene | is_pseudo=false	0	10.585	14	4	10	4	314	35.2	6.54	9.54	4	1.138	0.753	0.679	1.652	0.891	0.362278	0.990614	0.826236	0.51218	0.434559	0.885121	0.998984	0.973927	0.921489	0.80811	7.79	16.46	23.74	41.51	10.94	0.894	1.198	1.138	0.847	0.447	0.753	0.937	0.586	0.679	1.189	1.652	2.745	0.891	0.83
FALSE	High	Master Protein	TGGT1_228290-t26_1-p1	transcript=TGGT1_228290-t26_1 | gene=TGGT1_228290 | organism=Toxoplasma_gondii_GT1 | gene_product=Abhydrolase_2 domain-containing protein [Source:UniProtKB/TrEMBL;Acc:S7W616] | transcript_product=phospholipase/carboxylesterase | location=TGGT1_chrX:347556-349031(-) | protein_length=491 | sequence_SO=chromosome | SO=protein_coding_gene | is_pseudo=false	0	8.834	11	3	6	3	491	52.5	8.7	7.13	3	0.646	0.722	0.427	1.607	1.005	0.0102908	0.87983	0.247687	0.560256	0.849552	0.0983814	0.974587	0.830689	0.940113	0.96407	26.9	12.65	2.89	44.47	7.79	0.646	1.094	0.547	0.79	0.593	0.722	0.436	0.427	0.337	1.125	1.607	100	1.005	0.952
FALSE	High	Master Protein	TGGT1_235020-t26_1-p1	transcript=TGGT1_235020-t26_1 | gene=TGGT1_235020 | organism=Toxoplasma_gondii_GT1 | gene_product=WD_REPEATS_REGION domain-containing protein [Source:UniProtKB/TrEMBL;Acc:S7UVW7] | transcript_product=putative COPI protein | location=TGGT1_chrX:4501792-4518157(-) | protein_length=1256 | sequence_SO=chromosome | SO=protein_coding_gene | is_pseudo=false	0	42.163	15	13	37	13	1256	137	6.16	24.57	13	0.945	0.584	0.617	1.543	0.866	0.814248	0.275563	0.679228	0.635697	0.249504	0.985103	0.774936	0.945617	0.950029	0.620601	24.37	5.84	25.34	18.06	29.82	0.945	0.811	1.182	0.686	0.562	0.584	0.752	0.527	0.617	1.543	1.355	2.318	0.866	0.61
FALSE	High	Master Protein	TGGT1_219800-t26_1-p1	transcript=TGGT1_219800-t26_1 | gene=TGGT1_219800 | organism=Toxoplasma_gondii_GT1 | gene_product=Vacuolar proton pump subunit B [Source:UniProtKB/TrEMBL;Acc:A0A125YPJ0] | transcript_product=putative vacuolar ATP synthase subunit b | location=TGGT1_chrXII:574692-577426(+) | protein_length=505 | sequence_SO=chromosome | SO=protein_coding_gene | is_pseudo=false	0	42.814	38	14	73	14	505	56.6	5.4	48.7	14	1.016	0.673	0.663	1.062	0.947	0.832798	0.453713	0.78691	0.600999	0.490953	0.985103	0.8874	0.972757	0.942063	0.847237	13.51	53.95	20.97	31.64	21.38	0.687	1.108	1.016	1.201	0.494	0.673	0.888	0.663	0.58	0.836	1.062	1.601	0.947	0.654
FALSE	High	Master Protein	TGGT1_238040A-t26_1-p1	transcript=TGGT1_238040A-t26_1 | gene=TGGT1_238040A | organism=Toxoplasma_gondii_GT1 | gene_product=Protein disulfide-isomerase domain-containing protein [Source:UniProtKB/TrEMBL;Acc:S7W691] | transcript_product=protein disulfide-isomerase domain-containing protein | location=TGGT1_chrVI:19741-27980(-) | protein_length=1139 | sequence_SO=chromosome | SO=protein_coding_gene | is_pseudo=false	0	7.481	3	3	3	3	1139	126.1	8.68	6.08	3	1.142	0.896	0.978	2.737	2.405	0.351643	0.68266	0.605376	0.0451121	0.0043882	0.87471	0.931816	0.93387	0.271796	0.0267352	30.63	25.17	13.24	72.43	82.84	0.906	1.417	1.142	1.079	0.612	0.896	0.978	1.074	0.751	2.737	1.4	100	2.405	1.061
FALSE	High	Master Protein	TGGT1_321570-t26_1-p1	transcript=TGGT1_321570-t26_1 | gene=TGGT1_321570 | organism=Toxoplasma_gondii_GT1 | gene_product=FabA domain-containing protein [Source:UniProtKB/TrEMBL;Acc:A0A125YY87] | transcript_product=beta-hydroxyacyl-acyl carrier protein dehydratase (FABZ) | location=TGGT1_chrIb:1733019-1733808(-) | protein_length=231 | sequence_SO=chromosome | SO=protein_coding_gene | is_pseudo=false	0.009	2.717	3	1	1	1	231	24.6	7.83	0	1	0.749	0.875	0.614	1.182	1.101	0.0966554	0.714026	0.672056	0.8114	0.936516	0.485874	0.933509	0.945617	0.980849	0.984886	31.96	42.44	24.53	9.64	25.92	0.603	0.954	0.749	0.875	0.643	1.225	0.527	0.614	0.917	1.259	1.182	1.055	1.101	0.76
FALSE	High	Master Protein	TGGT1_294710-t26_1-p1	transcript=TGGT1_294710-t26_1 | gene=TGGT1_294710 | organism=Toxoplasma_gondii_GT1 | gene_product=RNA recognition motif-containing protein [Source:UniProtKB/TrEMBL;Acc:A0A125YVJ2] | transcript_product=RNA recognition motif-containing protein | location=TGGT1_chrIa:1067961-1074404(-) | protein_length=1151 | sequence_SO=chromosome | SO=protein_coding_gene | is_pseudo=false	0.002	3.655	2	1	1	1	1151	122	11.11	0	1	0.847	0.302	0.217	2.237	2.275	0.366857	0.0188453	0.0114987	0.142849	0.0362482	0.885121	0.136676	0.0953227	0.621536	0.175302	26.64	104.29	110.98	31.61	147.61	0.718	0.847	1.218	0.302	1.017	0.01	0.217	0.862	0.01	100	2.237	1.76	100	2.275
FALSE	Medium	Master Protein	TGGT1_286120-t26_1-p1	transcript=TGGT1_286120-t26_1 | gene=TGGT1_286120 | organism=Toxoplasma_gondii_GT1 | gene_product=Prolyl endopeptidase [Source:UniProtKB/TrEMBL;Acc:S7W343] | transcript_product=prolyl endopeptidase | location=TGGT1_chrV:1831629-1840693(-) | protein_length=825 | sequence_SO=chromosome | SO=protein_coding_gene | is_pseudo=false	0.032	2.041	2	1	1	1	825	93	6.92	0	1	0.986	0.62	0.444	1.916	1.044	0.976712	0.565627	0.280005	0.293116	0.874869	0.994532	0.91465	0.846352	0.850784	0.97132	6.3	24.17	45.31	39.27	146.84	0.599	0.986	1.03	0.741	0.01	0.62	0.444	0.01	0.639	1.408	1.916	100	1.044	0.01
FALSE	High	Master Protein	TGGT1_251540-t26_1-p1	transcript=TGGT1_251540-t26_1 | gene=TGGT1_251540 | organism=Toxoplasma_gondii_GT1 | gene_product=Dense granule protein GRA9 [Source:UniProtKB/TrEMBL;Acc:A0A125YWK4] | transcript_product=dense granule protein GRA9 | location=TGGT1_chrXII:5372511-5374084(+) | protein_length=318 | sequence_SO=chromosome | SO=protein_coding_gene | is_pseudo=false	0.009	2.687	5	1	2	1	318	35.3	5.39	0	1	0.084	6.043	0.261	100	100	1e-17	3.41921e-07	0.031183	1e-17	1e-17	1.73608e-16	4.31423e-06	0.229338	1.03865e-16	1.03758e-16	617.33	1222.17	147.87	0	0	0.01		0.713		100	0.365	0.01	100	0.261			100		100
FALSE	High	Master Protein	TGGT1_266990-t26_1-p1	transcript=TGGT1_266990-t26_1 | gene=TGGT1_266990 | organism=Toxoplasma_gondii_GT1 | gene_product=Coatomer subunit beta [Source:UniProtKB/TrEMBL;Acc:S7UHC3] | transcript_product=beta-COP | location=TGGT1_chrIX:687782-698362(+) | protein_length=1103 | sequence_SO=chromosome | SO=protein_coding_gene | is_pseudo=false	0	36.486	16	13	36	13	1103	121.9	6.61	15.68	13	1.101	0.774	0.706	1.166	0.852	0.478923	0.911242	0.886367	0.783083	0.221985	0.941301	0.974587	0.981398	0.971965	0.582135	8.84	19.68	3.91	29.37	1.11	0.667	1.101	1.167	0.96	0.774	0.683	0.706	0.809	0.688	0.935	1.166	1.68	0.845	0.852
FALSE	High	Master Protein	TGGT1_205010-t26_1-p1	transcript=TGGT1_205010-t26_1 | gene=TGGT1_205010 | organism=Toxoplasma_gondii_GT1 | gene_product=SF3b1 domain-containing protein [Source:UniProtKB/TrEMBL;Acc:S7UUF2] | transcript_product=putative U2 small nuclear ribonucleoprotein family protein | location=TGGT1_chrVIIa:1582142-1590578(-) | protein_length=1386 | sequence_SO=chromosome | SO=protein_coding_gene | is_pseudo=false	0	13.865	4	4	8	4	1386	150.7	5.95	11.53	4	0.981	0.708	0.653	2.318	1.145	0.997139	0.852415	0.763713	0.118583	0.741006	0.999146	0.962399	0.972757	0.559222	0.93417	7.36	13.91	8.91	77.49	46.01	0.934	0.981	1.056	0.781	0.708	0.31	0.653	0.694	0.331	0.696	2.318	3.53	0.79	1.545
FALSE	High	Master Protein	TGGT1_299780-t26_1-p1	transcript=TGGT1_299780-t26_1 | gene=TGGT1_299780 | organism=Toxoplasma_gondii_GT1 | gene_product=hypothetical protein | transcript_product=hypothetical protein | location=TGGT1_chrXII:309236-312184(-) | protein_length=545 | sequence_SO=chromosome | SO=protein_coding_gene | is_pseudo=false	0	17.123	16	7	7	7	545	59.2	9.6	9.04	7	0.932	0.397	0.443	1.855	1.417	0.752179	0.0511519	0.278466	0.33443	0.228611	0.973613	0.303725	0.845747	0.86944	0.590091	29.29	26.62	83.47	7.29	5.07	1.162	0.932	0.68	0.337	0.968	0.397	0.443	1.129	0.283	2.993	1.855	1.764	1.007	1.465
FALSE	High	Master Protein	TGGT1_297650-t26_1-p1	transcript=TGGT1_297650-t26_1 | gene=TGGT1_297650 | organism=Toxoplasma_gondii_GT1 | gene_product=Metallophos domain-containing protein [Source:UniProtKB/TrEMBL;Acc:S7UJX7] | transcript_product=Ser/Thr phosphatase family protein | location=TGGT1_chrII:1870431-1877352(-) | protein_length=651 | sequence_SO=chromosome | SO=protein_coding_gene | is_pseudo=false	0	13.687	9	5	7	5	651	72.5	9.31	1.78	5	1.064	0.831	0.666	1.401	1.193	0.62115	0.806502	0.796028	0.82894	0.54681	0.965361	0.949222	0.972757	0.980849	0.86452	17.8	20.56	33.75	11.33	8.74	1.191	1.064	0.742	0.559	0.831	0.964	0.666	0.887	0.543	1.294	1.401	1.524	0.733	1.193
FALSE	Low	Master Protein	TGGT1_213660-t26_1-p1	transcript=TGGT1_213660-t26_1 | gene=TGGT1_213660 | organism=Toxoplasma_gondii_GT1 | gene_product=Zinc finger (CCCH type) motif-containing protein [Source:UniProtKB/TrEMBL;Acc:S7UPG3] | transcript_product=zinc finger (CCCH type) motif-containing protein | location=TGGT1_chrV:1080657-1085300(-) | protein_length=1220 | sequence_SO=chromosome | SO=protein_coding_gene | is_pseudo=false	0.067	1.64	1	1	1	1	1220	129.8	5.9	0	1		100	100	0.01	1.596		1e-17	1e-17	1e-17	0.31416		1.60374e-16	1.34062e-16	1.03865e-16	0.693962		0	0	0	0					100			100			0.01			1.596
FALSE	High	Master Protein	TGGT1_232780-t26_1-p1	transcript=TGGT1_232780-t26_1 | gene=TGGT1_232780 | organism=Toxoplasma_gondii_GT1 | gene_product=hypothetical protein | transcript_product=hypothetical protein | location=TGGT1_chrVIII:2255308-2260311(-) | protein_length=713 | sequence_SO=chromosome | SO=protein_coding_gene | is_pseudo=false	0	72.442	45	20	87	20	713	77.6	7.39	56.61	20	0.9	1.75	1.837	0.679	1.301	0.593224	0.0330185	0.0737321	0.0858657	0.264286	0.956627	0.220466	0.437801	0.448675	0.64018	6.95	29.04	25.12	24.96	5.26	1.413	0.9	0.859	1.407	2.321	1.75	1.837	2.194	1.525	1.021	0.581	0.679	1.301	1.347
FALSE	High	Master Protein	TGGT1_300100-t26_1-p1	transcript=TGGT1_300100-t26_1 | gene=TGGT1_300100 | organism=Toxoplasma_gondii_GT1 | gene_product=Rhoptry neck protein RON2 [Source:UniProtKB/TrEMBL;Acc:S7UGV9] | transcript_product=rhoptry neck protein RON2 | location=TGGT1_chrXII:175560-186129(-) | protein_length=1479 | sequence_SO=chromosome | SO=protein_coding_gene | is_pseudo=false	0	136.291	28	39	196	39	1479	166.3	9.58	155.93	39	1.001	0.987	1.055	1.281	1.28	0.904761	0.686299	0.503869	0.98156	0.305003	0.985103	0.931816	0.926268	0.995636	0.682569	4.51	26.4	5.64	1.04	8.65	1.243	0.97	1.001	0.784	1.201	0.987	1.055	1.095	0.992	1.281	1.25	1.29	0.992	1.355
FALSE	High	Master Protein	TGGT1_360830-t26_1-p1	transcript=TGGT1_360830-t26_1 | gene=TGGT1_360830 | organism=Toxoplasma_gondii_GT1 | gene_product=Nucleoside-triphosphatase [Source:UniProtKB/TrEMBL;Acc:S7UZG2] | transcript_product=nucleoside-triphosphatase | location=AAQM03000066:41-1153(+) | protein_length=370 | sequence_SO=contig | SO=protein_coding_gene | is_pseudo=false	0	60.857	52	15	87	4	370	40.5	5.22	69.11	15	0.967	0.726	0.554	1.374	0.839	0.928748	0.820506	0.527693	0.869564	0.175219	0.985103	0.950701	0.926406	0.986633	0.505431	19.96	13.41	44.39	68.28	30.95	0.389	0.967	1.118	0.799	0.466	0.726	0.31	0.554	0.791	0.741	1.374	3.022	0.839	0.694
FALSE	High	Master Protein	TGGT1_253640-t26_1-p1	transcript=TGGT1_253640-t26_1 | gene=TGGT1_253640 | organism=Toxoplasma_gondii_GT1 | gene_product=Ion_trans domain-containing protein [Source:UniProtKB/TrEMBL;Acc:A0A125YM57] | transcript_product=hypothetical protein | location=TGGT1_chrIII:1058615-1061019(+) | protein_length=230 | sequence_SO=chromosome | SO=protein_coding_gene | is_pseudo=false	0.004	3.465	7	1	4	1	230	25.3	5.81	2.34	1	1.233	0.755	0.931	1.483	1.162	0.161248	0.965593	0.677199	0.713002	0.827691	0.625796	0.991004	0.945617	0.96852	0.958229	11.07	20.32	5.85	20.3	24.99	1.141	1.233	1.349	1.045	0.755	0.664	1.192	0.931	0.896	1.483	1.28	1.751	1.549	0.966
FALSE	Medium	Master Protein	TGGT1_266435-t26_1-p1	transcript=TGGT1_266435-t26_1 | gene=TGGT1_266435 | organism=Toxoplasma_gondii_GT1 | gene_product=hypothetical protein | transcript_product=hypothetical protein | location=TGGT1_chrIX:954253-978136(+) | protein_length=3668 | sequence_SO=chromosome | SO=protein_coding_gene | is_pseudo=false	0.037	1.89	0	1	1	1	3668	412.5	8.9	0	1
FALSE	High	Master Protein	TGGT1_314780-t26_1-p1	transcript=TGGT1_314780-t26_1 | gene=TGGT1_314780 | organism=Toxoplasma_gondii_GT1 | gene_product=Myosin G [Source:UniProtKB/TrEMBL;Acc:A0A125YZG6] | transcript_product=myosin G | location=TGGT1_chrXI:4226752-4246422(-) | protein_length=2059 | sequence_SO=chromosome | SO=protein_coding_gene | is_pseudo=false	0	46.754	12	16	38	16	2059	227.2	6.37	11.72	16	0.913	0.336	0.251	3.32	1.524	0.655661	0.0184627	0.0256301	0.0117499	0.0708584	0.967609	0.136676	0.19375	0.0815267	0.283773	5.21	1.68	7.66	34.19	11.94	0.801	0.946	0.913	0.345	0.336	0.333	0.229	0.251	0.264	2.066	4.086	3.32	0.908	1.646
FALSE	High	Master Protein	TGGT1_288750-t26_1-p1	transcript=TGGT1_288750-t26_1 | gene=TGGT1_288750 | organism=Toxoplasma_gondii_GT1 | gene_product=Ubiquinol-cytochrome c reductase [Source:UniProtKB/TrEMBL;Acc:A0A125YYJ3] | transcript_product=ubiquinol-cytochrome c reductase | location=TGGT1_chrIX:2534185-2536581(+) | protein_length=234 | sequence_SO=chromosome | SO=protein_coding_gene | is_pseudo=false	0	5.533	9	2	7	2	234	26.7	9.16	1.63	2	0.736	0.895	0.659	1.323	1.139	0.0778466	0.648088	0.779207	0.949234	0.718958	0.414854	0.927717	0.972757	0.995636	0.929054	14.41	12.53	0.66	17.83	36.36	0.671	1.208	0.736	0.978	0.649	0.895	0.656	0.784	0.659	1.164	1.323	2.928	1.139	0.859
FALSE	High	Master Protein	TGGT1_242260-t26_1-p1	transcript=TGGT1_242260-t26_1 | gene=TGGT1_242260 | organism=Toxoplasma_gondii_GT1 | gene_product=hypothetical protein | transcript_product=hypothetical protein | location=TGGT1_chrVI:1834193-1843235(-) | protein_length=2788 | sequence_SO=chromosome | SO=protein_coding_gene | is_pseudo=false	0	5.331	1	2	2	2	2788	300.1	6.73	0	2		100	100	0.01	1.624		1e-17	1e-17	1e-17	0.223041		1.60374e-16	1.34062e-16	1.03865e-16	0.582135		0	0	0	52.24					100	100		100	100		0.01	0.01		2.293
FALSE	High	Master Protein	TGGT1_287270-t26_1-p1	transcript=TGGT1_287270-t26_1 | gene=TGGT1_287270 | organism=Toxoplasma_gondii_GT1 | gene_product=hypothetical protein | transcript_product=hypothetical protein | location=TGGT1_chrV:1342040-1344154(+) | protein_length=704 | sequence_SO=chromosome | SO=protein_coding_gene | is_pseudo=false	0	5.315	3	2	2	2	704	75.1	8.1	0	2	0.09	100	0.904	0.126	1.287	1e-17	1e-17	0.72175	5.24045e-10	0.712101	1.73608e-16	1.60374e-16	0.969176	4.79572e-09	0.92515	661.48	0	146.92	929.57	147.11	0.01		0.816	100	100	0.01	0.904	100	0.01		0.01	1.592	100	1.287
FALSE	High	Master Protein	TGGT1_208560-t26_1-p1	transcript=TGGT1_208560-t26_1 | gene=TGGT1_208560 | organism=Toxoplasma_gondii_GT1 | gene_product=Carrier superfamily protein [Source:UniProtKB/TrEMBL;Acc:A0A125YPP8] | transcript_product=carrier superfamily protein | location=TGGT1_chrIb:794791-800321(-) | protein_length=670 | sequence_SO=chromosome | SO=protein_coding_gene | is_pseudo=false	0	19.335	13	8	28	8	670	72.3	9.69	10.92	8	1.014	0.954	0.94	1.147	1.101	0.840341	0.551883	0.663129	0.750879	0.903621	0.985103	0.91465	0.941345	0.971965	0.977258	4.86	20.95	11.9	0.86	12.13	1.014	0.981	1.275	0.836	1.419	0.954	0.87	1.164	0.94	1.147	1.141	1.256	1.011	1.529
FALSE	High	Master Protein	TGGT1_208790-t26_1-p1	transcript=TGGT1_208790-t26_1 | gene=TGGT1_208790 | organism=Toxoplasma_gondii_GT1 | gene_product=Putative MC family transporter [Source:UniProtKB/TrEMBL;Acc:A0A125YLN1] | transcript_product=putative MC family transporter | location=TGGT1_chrIb:876872-880126(-) | protein_length=310 | sequence_SO=chromosome | SO=protein_coding_gene | is_pseudo=false	0	30.171	42	11	43	11	310	33.6	9.92	33.68	11	0.848	0.774	0.665	1.251	1.012	0.370592	0.742628	0.792726	0.931672	0.755028	0.887833	0.943561	0.972757	0.992622	0.940377	0.99	16.98	10.76	36.12	10.68	0.848	1.022	0.843	0.915	0.774	0.695	0.754	0.665	0.62	0.947	1.251	1.752	0.8	1.012
FALSE	High	Master Protein	TGGT1_221280-t26_1-p1	transcript=TGGT1_221280-t26_1 | gene=TGGT1_221280 | organism=Toxoplasma_gondii_GT1 | gene_product=hypothetical protein | transcript_product=hypothetical protein | location=TGGT1_chrII:186622-203205(+) | protein_length=4037 | sequence_SO=chromosome | SO=protein_coding_gene | is_pseudo=false	0	17.625	2	7	7	7	4037	438	7.06	7.44	7	10.32	1.41	100	0.603	0.902	1e-17	0.1171	1e-17	0.0417901	0.526232	1.73608e-16	0.52058	1.34062e-16	0.252681	0.862115	710.63	55.92	0	54.43	11.57	1.065		100	0.878	100	1.41	0.936	100	100	0.953	0.01	0.603	0.837	1.008
FALSE	High	Master Protein	TGGT1_215400-t26_1-p1	transcript=TGGT1_215400-t26_1 | gene=TGGT1_215400 | organism=Toxoplasma_gondii_GT1 | gene_product=RRM domain-containing protein [Source:UniProtKB/TrEMBL;Acc:A0A125YMD0] | transcript_product=RNA recognition motif-containing protein | location=TGGT1_chrX:6833154-6834269(+) | protein_length=371 | sequence_SO=chromosome | SO=protein_coding_gene | is_pseudo=false	0	22.56	25	7	13	7	371	41.3	10.58	6.82	7	0.976	0.91	1.01	0.912	0.773	0.972282	0.618273	0.561274	0.352076	0.081885	0.992919	0.920342	0.926406	0.87144	0.312221	23.68	6.95	9.48	16.85	12.91	0.976	0.841	1.275	0.91	0.971	0.869	1.01	0.711	1.075	0.717	1.029	0.912	0.603	0.847
FALSE	Low	Master Protein	TGGT1_203110-t26_1-p1	transcript=TGGT1_203110-t26_1 | gene=TGGT1_203110 | organism=Toxoplasma_gondii_GT1 | gene_product=Citrate synthase [Source:UniProtKB/TrEMBL;Acc:S7W3U2] | transcript_product=putative citrate synthase | location=TGGT1_chrVIIa:2703911-2707079(-) | protein_length=509 | sequence_SO=chromosome | SO=protein_coding_gene | is_pseudo=false	0.068	1.638	2	1	3	1	509	56.6	8.75	3.52	1	1.613	1.14	1.839	1.859	1.929	0.0022994	0.401379	0.0733226	0.331648	0.000789068	0.025475	0.863117	0.43688	0.86944	0.00523599	17.2	13.84	1.76	0.6	35.94	0.756	1.613	1.8	1.289	1.14	1.034	0.975	1.839	1.861	1.859	0.859	1.866	2.397	0.979
FALSE	High	Master Protein	TGGT1_278990-t26_1-p1	transcript=TGGT1_278990-t26_1 | gene=TGGT1_278990 | organism=Toxoplasma_gondii_GT1 | gene_product=Putative phosphate carrier [Source:UniProtKB/TrEMBL;Acc:A0A125YTR2] | transcript_product=putative phosphate carrier | location=TGGT1_chrXII:5622211-5625652(-) | protein_length=479 | sequence_SO=chromosome | SO=protein_coding_gene | is_pseudo=false	0	30.611	25	10	53	10	479	53.1	9.41	50.56	10	0.656	0.866	0.531	1.327	1.124	0.0132785	0.992282	0.472256	0.944168	0.775797	0.12087	0.999207	0.91777	0.995315	0.942756	0.24	13.73	3.55	26.77	51.65	0.656	1.013	0.655	0.954	0.455	0.866	0.518	0.531	0.627	1.087	1.327	3.394	1.124	0.732
FALSE	High	Master Protein	TGGT1_215460-t26_1-p1	transcript=TGGT1_215460-t26_1 | gene=TGGT1_215460 | organism=Toxoplasma_gondii_GT1 | gene_product=40S ribosomal protein S24 [Source:UniProtKB/TrEMBL;Acc:S7UQS1] | transcript_product=ribosomal protein RPS24 | location=TGGT1_chrX:6863478-6865141(-) | protein_length=267 | sequence_SO=chromosome | SO=protein_coding_gene | is_pseudo=false	0	35.054	21	6	108	6	267	30.4	11.08	187.07	6	0.757	0.985	1.071	0.871	0.982	0.110912	0.691612	0.48466	0.292098	0.632119	0.536713	0.931816	0.926268	0.849694	0.897666	14.67	30.26	53.77	5.5	20.94	1.638	0.757	0.689	0.985	0.818	1.285	1.884	0.682	1.071	0.904	0.796	0.871	0.982	0.627
FALSE	High	Master Protein	TGGT1_214320-t26_1-p1	transcript=TGGT1_214320-t26_1 | gene=TGGT1_214320 | organism=Toxoplasma_gondii_GT1 | gene_product=MFS domain-containing protein [Source:UniProtKB/TrEMBL;Acc:A0A125YKB0] | transcript_product=facilitative glucose transporter GT1 | location=TGGT1_chrX:6138702-6140408(+) | protein_length=568 | sequence_SO=chromosome | SO=protein_coding_gene | is_pseudo=false	0	10.726	7	4	20	4	568	61.6	6.93	18.34	4	0.949	0.69	0.78	1.298	1.091	0.837316	0.499637	0.953164	0.99015	0.90723	0.985103	0.909352	0.993783	0.995636	0.978711	12.09	24.36	3.54	17.93	40.5	0.878	0.949	1.134	0.956	0.593	0.69	0.799	0.679	0.78	1.141	1.298	2.203	1.091	0.793
FALSE	High	Master Protein	TGGT1_228470-t26_1-p1	transcript=TGGT1_228470-t26_1 | gene=TGGT1_228470 | organism=Toxoplasma_gondii_GT1 | gene_product=Ribosomal protein L15 [Source:UniProtKB/TrEMBL;Acc:A0A125YX54] | transcript_product=ribosomal protein RPL15 | location=TGGT1_chrX:205832-208062(+) | protein_length=205 | sequence_SO=chromosome | SO=protein_coding_gene | is_pseudo=false	0	37.764	30	6	84	6	205	24.3	11.18	126.76	6	0.916	0.864	0.944	0.849	0.797	0.671609	0.998035	0.656376	0.262504	0.094692	0.969375	0.999207	0.941345	0.826287	0.336333	57.06	66.16	6.03	8.35	58.9	1.489	0.916	0.652	0.58	0.864	1.56	0.944	0.907	1.002	0.692	0.9	0.849	0.377	0.797
FALSE	High	Master Protein	TGGT1_248670-t26_1-p1	transcript=TGGT1_248670-t26_1 | gene=TGGT1_248670 | organism=Toxoplasma_gondii_GT1 | gene_product=V-type H(+)-translocating pyrophosphatase VP1 [Source:UniProtKB/TrEMBL;Acc:A0A125YIK4] | transcript_product=V-type H(+)-translocating pyrophosphatase VP1 | location=TGGT1_chrXII:4005858-4010809(+) | protein_length=816 | sequence_SO=chromosome | SO=protein_coding_gene | is_pseudo=false	0.001	4.399	3	2	2	2	816	85.2	5.21	0	2
FALSE	Medium	Master Protein	TGGT1_271740-t26_1-p1	transcript=TGGT1_271740-t26_1 | gene=TGGT1_271740 | organism=Toxoplasma_gondii_GT1 | gene_product=hypothetical protein | transcript_product=hypothetical protein | location=TGGT1_chrVIII:4419752-4431388(+) | protein_length=1992 | sequence_SO=chromosome | SO=protein_coding_gene | is_pseudo=false	0.018	2.329	1	1	1	1	1992	216	7.88	0	1	1.352	0.79	1.068	1.331	0.688	0.0494292	0.97489	0.487565	0.936348	0.147396	0.321385	0.995734	0.926268	0.992622	0.450611	1.74	47.41	72.27	40.76	30.79	1.368	1.352	1.148	1.162	0.79	0.405	1.589	1.068	0.465	0.49	1.331	1.698	0.57	1.052
FALSE	High	Master Protein	TGGT1_215775-t26_1-p1	transcript=TGGT1_215775-t26_1 | gene=TGGT1_215775 | organism=Toxoplasma_gondii_GT1 | gene_product=Protein kinase domain-containing protein [Source:UniProtKB/TrEMBL;Acc:A0A125YM30] | transcript_product=rhoptry protein ROP8 | location=TGGT1_chrX:7045451-7047178(+) | protein_length=575 | sequence_SO=chromosome | SO=protein_coding_gene | is_pseudo=false	0	26.473	15	6	44	3	575	65.4	9.09	56.3	6	0.925	0.623	0.747	3.132	1.228	0.715348	0.591248	0.978405	0.01809	0.444631	0.973495	0.91465	0.995031	0.120576	0.814998	14.19	35.15	4.31	5.14	23.18	0.925	0.844	1.256	0.5	0.817	0.623	0.491	0.747	0.77	3.241	1.503	3.132	1.036	1.228
FALSE	High	Master Protein	TGGT1_222350-t26_1-p1	transcript=TGGT1_222350-t26_1 | gene=TGGT1_222350 | organism=Toxoplasma_gondii_GT1 | gene_product=hypothetical protein | transcript_product=hypothetical protein | location=TGGT1_chrII:1038452-1045656(-) | protein_length=410 | sequence_SO=chromosome | SO=protein_coding_gene | is_pseudo=false	0	42.099	38	15	54	15	410	47.9	8.88	48.61	15	1.053	0.878	0.926	1.33	1.168	0.666809	0.958556	0.685132	0.938689	0.613527	0.969107	0.988511	0.945617	0.993057	0.893922	1.79	0.62	22.6	38.23	2.03	0.956	1.053	1.065	0.878	1.131	0.875	0.803	1.317	0.926	1.33	0.96	1.673	1.168	1.152
FALSE	High	Master Protein	TGGT1_212220-t26_1-p1	transcript=TGGT1_212220-t26_1 | gene=TGGT1_212220 | organism=Toxoplasma_gondii_GT1 | gene_product=hypothetical protein | transcript_product=hypothetical protein | location=TGGT1_chrX:3876902-3879847(+) | protein_length=981 | sequence_SO=chromosome | SO=protein_coding_gene | is_pseudo=false	0	26.18	11	10	20	10	981	107.9	7.23	3.68	10	1.084	0.348	0.438	3.31	1.264	0.542225	0.0187287	0.268766	0.0120187	0.37294	0.942037	0.136676	0.843541	0.0830518	0.754572	24.09	18.91	9.46	19.54	11.81	1.26	1.084	0.883	0.348	0.399	0.28	0.468	0.438	0.224	3.31	2.874	3.918	1.264	1.364
FALSE	High	Master Protein	TGGT1_238170-t26_1-p1	transcript=TGGT1_238170-t26_1 | gene=TGGT1_238170 | organism=Toxoplasma_gondii_GT1 | gene_product=hypothetical protein | transcript_product=hypothetical protein | location=TGGT1_chrVI:95675-101549(+) | protein_length=1557 | sequence_SO=chromosome | SO=protein_coding_gene | is_pseudo=false	0	51.784	14	18	47	18	1557	165.9	8.72	34.58	18	0.844	5.132	3.653	0.274	1.23	0.355469	7.553e-08	0.00148868	3.44766e-05	0.424718	0.879799	9.89385e-07	0.0139594	0.000284726	0.802573	4.44	4.88	56.72	16.17	22.8	0.983	0.844	0.82	5.132	1.137	5.301	5.051	1.207	3.653	0.247	0.386	0.274	1.419	0.456
FALSE	Medium	Master Protein	TGGT1_226870A-t26_1-p1	transcript=TGGT1_226870A-t26_1 | gene=TGGT1_226870A | organism=Toxoplasma_gondii_GT1 | gene_product=Tubulin gamma chain [Source:UniProtKB/TrEMBL;Acc:S7WCU1] | transcript_product=tubulin gamma chain | location=TGGT1_chrX:1184062-1189107(-) | protein_length=332 | sequence_SO=chromosome | SO=protein_coding_gene | is_pseudo=false	0.027	2.119	3	1	1	1	332	37	5.2	2	1	1.113	1.354	1.285	1.235	1.426	0.441375	0.144311	0.286041	0.903203	0.331887	0.923296	0.584049	0.852635	0.987168	0.712911	22.1	21.83	0.32	62.12	22.59	0.947	100	1.113	1.354	1.685	1.155	1.282	100	1.285	100	0.717	1.235	100	1.209
FALSE	High	Master Protein	TGGT1_257990-t26_1-p1	transcript=TGGT1_257990-t26_1 | gene=TGGT1_257990 | organism=Toxoplasma_gondii_GT1 | gene_product=Putative heat shock protein 101 [Source:UniProtKB/TrEMBL;Acc:S7UZ38] | transcript_product=putative heat shock protein 101 | location=TGGT1_chrVIIb:3637480-3646383(+) | protein_length=927 | sequence_SO=chromosome | SO=protein_coding_gene | is_pseudo=false	0	30.485	20	12	19	12	927	104.2	6.51	7.46	12	1.01	0.432	0.545	1.766	1.009	0.860683	0.0997103	0.506201	0.404575	0.866808	0.985103	0.477941	0.926268	0.904455	0.969164	45.62	7.36	21.75	55.94	11.35	0.613	1.01	1.321	0.992	0.432	0.412	0.545	0.659	0.475	1.1	1.766	4.578	1.009	1.086
FALSE	High	Master Protein	TGGT1_300140-t26_1-p1	transcript=TGGT1_300140-t26_1 | gene=TGGT1_300140 | organism=Toxoplasma_gondii_GT1 | gene_product=Putative elongation factor 1-gamma [Source:UniProtKB/TrEMBL;Acc:A0A125YG44] | transcript_product=putative elongation factor 1-gamma | location=TGGT1_chrXII:146844-149444(+) | protein_length=394 | sequence_SO=chromosome | SO=protein_coding_gene | is_pseudo=false	0	40.466	30	11	51	11	394	44	6.3	76.51	11	0.895	0.788	0.801	1.261	1.052	0.571206	0.782405	0.910942	0.947959	0.930113	0.956627	0.943561	0.985048	0.995636	0.983838	13.61	1.22	16.83	49.24	23.75	0.769	0.985	0.895	1.216	0.781	0.788	0.801	0.903	0.678	0.842	1.261	2.503	1.052	0.884
FALSE	High	Master Protein	TGGT1_304710-t26_1-p1	transcript=TGGT1_304710-t26_1 | gene=TGGT1_304710 | organism=Toxoplasma_gondii_GT1 | gene_product=eRF1_1 domain-containing protein [Source:UniProtKB/TrEMBL;Acc:S7UUD7] | transcript_product=putative eukaryotic peptide chain release factor | location=TGGT1_chrVIIa:615815-622350(-) | protein_length=814 | sequence_SO=chromosome | SO=protein_coding_gene | is_pseudo=false	0	22.406	10	8	32	8	814	90	8.88	42.74	8	0.971	0.876	0.994	1.075	0.924	0.948337	0.964742	0.583185	0.623904	0.408516	0.987619	0.990723	0.931727	0.949247	0.786379	16.52	50.65	27.87	44.38	37.32	0.874	1.176	0.971	1.331	0.623	0.876	1.224	0.777	0.994	0.664	1.075	1.397	0.924	0.636
FALSE	High	Master Protein	TGGT1_226660-t26_1-p1	transcript=TGGT1_226660-t26_1 | gene=TGGT1_226660 | organism=Toxoplasma_gondii_GT1 | gene_product=hypothetical protein | transcript_product=hypothetical protein | location=TGGT1_chrX:1361506-1380909(+) | protein_length=3736 | sequence_SO=chromosome | SO=protein_coding_gene | is_pseudo=false	0	16.152	2	5	6	5	3736	389.6	5.53	8.29	5	1.032	0.839	0.515	2.054	1.169	0.755862	0.801843	0.43689	0.216001	0.794718	0.976129	0.949222	0.906025	0.764118	0.948124	67.99	16.79	42.73	68.28	9.9	1.752	1.032	0.559	0.946	0.507	0.839	1.449	0.515	0.4	1.108	2.054	3.459	1.048	1.247
FALSE	High	Master Protein	TGGT1_318310-t26_1-p1	transcript=TGGT1_318310-t26_1 | gene=TGGT1_318310 | organism=Toxoplasma_gondii_GT1 | gene_product=Transketolase [Source:UniProtKB/TrEMBL;Acc:S7VTA7] | transcript_product=transketolase | location=TGGT1_chrIV:1364235-1371398(-) | protein_length=699 | sequence_SO=chromosome | SO=protein_coding_gene | is_pseudo=false	0	15.002	9	6	21	6	699	76.9	6.89	12.21	6	0.824	0.415	0.293	3.247	1.106	0.28263	0.0808747	0.0548105	0.0138777	0.804762	0.810815	0.413268	0.351318	0.0939797	0.954783	0.39	24.3	54.66	71.05	119.02	0.711	0.824	0.826	0.415	0.103	0.497	0.293	0.072	0.463	1.691	3.247	100	1.106	0.218
FALSE	High	Master Protein	TGGT1_230430-t26_1-p1	transcript=TGGT1_230430-t26_1 | gene=TGGT1_230430 | organism=Toxoplasma_gondii_GT1 | gene_product=Putative vesicle-associated membrane protein [Source:UniProtKB/TrEMBL;Acc:A0A125YLL6] | transcript_product=putative vesicle-associated membrane protein | location=TGGT1_chrVIII:775206-779637(+) | protein_length=221 | sequence_SO=chromosome | SO=protein_coding_gene | is_pseudo=false	0	18.742	30	6	18	6	221	24.9	8.6	15.37	6	1.001	1.168	0.978	1.168	1.151	0.905199	0.28241	0.606546	0.786429	0.703891	0.985103	0.777197	0.93387	0.973268	0.923165	19.39	53.26	51.59	14.61	9.44	0.87	1.001	1.141	1.168	1.588	0.647	0.978	1.499	0.696	1.168	1.053	1.485	1.151	1.601
FALSE	High	Master Protein	TGGT1_215220-t26_1-p1	transcript=TGGT1_215220-t26_1 | gene=TGGT1_215220 | organism=Toxoplasma_gondii_GT1 | gene_product=hypothetical protein | transcript_product=hypothetical protein | location=TGGT1_chrX:6716950-6719044(+) | protein_length=502 | sequence_SO=chromosome | SO=protein_coding_gene | is_pseudo=false	0	7.524	18	3	12	3	502	55.1	5.36	17.5	3	0.772	0.358	0.257	2.112	1.168	0.139872	0.030016	0.0290123	0.189592	0.662967	0.590421	0.203587	0.216457	0.715489	0.903824	3.35	72.46	80.08	24.22	108.12	0.634	0.772	0.789	0.699	0.157	0.358	0.559	0.091	0.257	2.112	1.767	100	1.168	0.316
FALSE	High	Master Protein	TGGT1_215060-t26_1-p1	transcript=TGGT1_215060-t26_1 | gene=TGGT1_215060 | organism=Toxoplasma_gondii_GT1 | gene_product=Putative small GTP-binding protein sar1 [Source:UniProtKB/TrEMBL;Acc:A0A125YHQ9] | transcript_product=putative small GTP-binding protein sar1 | location=TGGT1_chrX:6612856-6615947(-) | protein_length=192 | sequence_SO=chromosome | SO=protein_coding_gene | is_pseudo=false	0	17.475	28	4	19	4	192	22.1	7.64	20.26	4	1.057	0.953	1.014	0.956	1.11	0.648958	0.728161	0.556037	0.421625	0.830589	0.965361	0.93859	0.926406	0.912488	0.958229	0.9	25.97	20.09	27.49	19.77	0.887	1.063	1.057	1.156	0.953	0.736	1.151	1.014	0.735	0.807	0.956	1.507	1.258	0.839
FALSE	High	Master Protein	TGGT1_310490-t26_1-p1	transcript=TGGT1_310490-t26_1 | gene=TGGT1_310490 | organism=Toxoplasma_gondii_GT1 | gene_product=Ribosomal_L18e/L15P domain-containing protein [Source:UniProtKB/TrEMBL;Acc:A0A125YTM1] | transcript_product=ribosomal protein RPL27A | location=TGGT1_chrXI:1345590-1346369(-) | protein_length=147 | sequence_SO=chromosome | SO=protein_coding_gene | is_pseudo=false	0	22.826	32	7	68	7	147	16.3	10.45	89.96	7	0.757	1.203	1.018	0.896	0.932	0.111577	0.316391	0.550307	0.328367	0.435629	0.537066	0.798919	0.926406	0.86944	0.80811	16.82	19.68	42.8	0.65	3.13	1.314	0.68	0.757	1.203	1.034	1.363	1.607	0.724	1.018	0.778	0.9	0.896	0.996	0.913
FALSE	Medium	Master Protein	TGGT1_315920-t26_1-p1	transcript=TGGT1_315920-t26_1 | gene=TGGT1_315920 | organism=Toxoplasma_gondii_GT1 | gene_product=RNA_pol_L_2 domain-containing protein [Source:UniProtKB/TrEMBL;Acc:S7W157] | transcript_product=DNA-directed RNA polymerase II RPB11A | location=TGGT1_chrXI:5020461-5022963(-) | protein_length=178 | sequence_SO=chromosome | SO=protein_coding_gene | is_pseudo=false	0.018	2.289	8	1	1	1	178	19.8	8.84	0	1	1.013	0.3	0.448	2.274	0.915	0.844601	0.0160103	0.288175	0.131441	0.535744	0.985103	0.126606	0.852635	0.606666	0.86452	18.69	60.15	147.6	21.81	9.91	0.886	1.013	100	0.505	0.158	0.3	0.448	0.161	100	1.939	2.274	3.045	0.98	0.36
FALSE	High	Master Protein	TGGT1_213050-t26_1-p1	transcript=TGGT1_213050-t26_1 | gene=TGGT1_213050 | organism=Toxoplasma_gondii_GT1 | gene_product=hypothetical protein | transcript_product=hypothetical protein | location=TGGT1_chrV:689391-689969(+) | protein_length=192 | sequence_SO=chromosome | SO=protein_coding_gene | is_pseudo=false	0.008	2.807	5	1	2	1	192	21.2	10.23	0	1	0.845	1.044	1.055	1.198	1.204	0.358706	0.438828	0.503325	0.840138	0.751198	0.883129	0.878634	0.926268	0.984724	0.938039	24.26	37.13	7.09	5.57	32.8	0.565	1.01	0.845	0.783	1.044	1.308	0.442	1.055	1.106	1.198	1.153	1.971	0.938	1.204
FALSE	High	Master Protein	TGGT1_299110-t26_1-p1	transcript=TGGT1_299110-t26_1 | gene=TGGT1_299110 | organism=Toxoplasma_gondii_GT1 | gene_product=Cleft lip and palate transmembrane protein 1 (Clptm1) protein [Source:UniProtKB/TrEMBL;Acc:S7UMP9] | transcript_product=cleft lip and palate transmembrane protein 1 (clptm1) protein | location=TGGT1_chrIII:2152699-2160213(+) | protein_length=619 | sequence_SO=chromosome | SO=protein_coding_gene | is_…	0	5.805	6	3	4	3	619	71.3	7.87	0	3	0.956	0.772	0.775	1.25	1.087	0.870932	0.931967	0.963344	0.929223	0.84724	0.985103	0.97792	0.994815	0.992622	0.96407	1.6	43.49	11.1	3.22	34.03	0.966	0.798	0.956	1.093	0.59	0.772	0.931	0.721	0.775	1.223	1.25	1.402	1.337	0.737
FALSE	High	Master Protein	TGGT1_228210-t26_1-p1	transcript=TGGT1_228210-t26_1 | gene=TGGT1_228210 | organism=Toxoplasma_gondii_GT1 | gene_product=AAA domain-containing protein [Source:UniProtKB/TrEMBL;Acc:A0A125YUA9] | transcript_product=26S proteasome regulatory subunit | location=TGGT1_chrX:396289-402825(-) | protein_length=398 | sequence_SO=chromosome | SO=protein_coding_gene | is_pseudo=false	0	14.651	18	5	5	4	398	44.4	7.31	6.06	5	0.79	0.866	0.557	1.195	1.195	0.183264	0.696557	0.535867	0.833917	0.547732	0.668002	0.932364	0.926406	0.982479	0.86452	20.57	69.22	18.57	34.85	20.02	0.694	0.79	1.215	1.624	0.866	0.428	0.495	0.557	0.688	0.914	1.487	1.195	1.195	1.034
FALSE	High	Master Protein	TGGT1_248390-t26_1-p1	transcript=TGGT1_248390-t26_1 | gene=TGGT1_248390 | organism=Toxoplasma_gondii_GT1 | gene_product=KOW domain-containing protein [Source:UniProtKB/TrEMBL;Acc:A0A125YI79] | transcript_product=ribosomal protein RPL26 | location=TGGT1_chrXII:3763041-3764059(-) | protein_length=141 | sequence_SO=chromosome | SO=protein_coding_gene | is_pseudo=false	0	34.298	43	9	92	9	141	16.3	10.64	136.97	9	0.918	0.975	1.163	0.863	0.977	0.680238	0.713782	0.386189	0.280887	0.610337	0.969375	0.933509	0.898096	0.844306	0.892312	0.78	9.15	22.94	0.99	1.17	1.313	0.913	0.918	0.975	0.918	1.228	1.343	0.865	1.163	0.845	0.863	0.869	0.977	0.786
FALSE	High	Master Protein	TGGT1_272760-t26_1-p1	transcript=TGGT1_272760-t26_1 | gene=TGGT1_272760 | organism=Toxoplasma_gondii_GT1 | gene_product=hypothetical protein | transcript_product=hypothetical protein | location=TGGT1_chrVIII:3745059-3747998(-) | protein_length=545 | sequence_SO=chromosome | SO=protein_coding_gene | is_pseudo=false	0.001	4.8	4	2	2	2	545	57.3	6.73	0	2	0.635	1	0.053	3.69	0.489	0.00758235	0.546833	8.05301e-08	0.005082	0.0141969	0.0778578	0.91465	9.87069e-07	0.037246	0.0779009	44.29	7412.26	379.69	147.86	0	0.01	0.635	0.906	100		0.01	0.282		0.01	0.01	3.69	100	0.489
FALSE	High	Master Protein	TGGT1_288000-t26_1-p1	transcript=TGGT1_288000-t26_1 | gene=TGGT1_288000 | organism=Toxoplasma_gondii_GT1 | gene_product=bMG10 domain-containing protein [Source:UniProtKB/TrEMBL;Acc:S7UPE0] | transcript_product=hypothetical protein | location=TGGT1_chrIX:2102790-2113779(+) | protein_length=2983 | sequence_SO=chromosome | SO=protein_coding_gene | is_pseudo=false	0	14.915	3	6	7	6	2983	327.8	8.09	2.16	6	1.019	1.065	1.109	1.299	1.525	0.819652	0.314008	0.441511	0.988287	0.107151	0.985103	0.798919	0.906219	0.995636	0.367143	8.9	58.37	70.88	52.72	14.8	0.957	1.161	1.019	1.712	1.065	0.646	1.639	1.109	0.493	0.678	1.299	1.761	1.677	1.525
FALSE	High	Master Protein	TGGT1_292950-t26_1-p1	transcript=TGGT1_292950-t26_1 | gene=TGGT1_292950 | organism=Toxoplasma_gondii_GT1 | gene_product=hypothetical protein | transcript_product=hypothetical protein | location=TGGT1_chrIa:22336-28275(-) | protein_length=1979 | sequence_SO=chromosome | SO=protein_coding_gene | is_pseudo=false	0	213.195	42	61	236	61	1979	210.7	9.13	225.27	61	0.997	1.22	1.359	0.969	1.351	0.922787	0.296416	0.237888	0.44247	0.182816	0.985103	0.787384	0.830689	0.915333	0.520768	6.23	15.46	15.21	44.76	21.85	1.393	0.957	0.997	1.093	1.854	1.22	1.359	1.901	1.22	1.457	0.744	0.969	1.55	1.351
FALSE	High	Master Protein	TGGT1_229250A-t26_1-p1	transcript=TGGT1_229250A-t26_1 | gene=TGGT1_229250A | organism=Toxoplasma_gondii_GT1 | gene_product=Ribosomal_L28e domain-containing protein [Source:UniProtKB/TrEMBL;Acc:S7V393] | transcript_product=ribosomal protein RPL28 | location=TGGT1_chrVIII:108601-108824(-) | protein_length=74 | sequence_SO=chromosome | SO=protein_coding_gene | is_pseudo=false	0	13.997	43	3	26	3	74	8.3	10.29	29.77	3	0.854	1.345	1.313	0.826	1.111	0.393334	0.181005	0.266537	0.232393	0.824622	0.904958	0.649801	0.843541	0.786881	0.958229	41.05	16.31	18.58	9.98	4.37	1.51	0.669	0.854	1.197	1.528	1.345	1.711	1.313	1.149	0.886	0.707	0.826	0.926	1.144
FALSE	High	Master Protein	TGGT1_261580-t26_1-p1	transcript=TGGT1_261580-t26_1 | gene=TGGT1_261580 | organism=Toxoplasma_gondii_GT1 | gene_product=Histone H2A [Source:UniProtKB/TrEMBL;Acc:A0A125YFR2] | transcript_product=histone H2AX | location=TGGT1_chrVIIb:1624096-1624503(-) | protein_length=135 | sequence_SO=chromosome | SO=protein_coding_gene | is_pseudo=false	0.008	2.891	7	1	7	1	135	14.5	10.56	15.85	1	0.767	1.012	0.6	1.677	1.696	0.130781	0.632351	0.637572	0.486907	0.00867668	0.581655	0.920368	0.941318	0.915333	0.0496805	28.82	34.42	73.35	10.48	21.51	0.952	0.767	0.593	1.247	0.186	1.012	1.187	0.143	0.6	1.558	2.385	1.677	1.942	0.444
FALSE	High	Master Protein	TGGT1_321450-t26_1-p1	transcript=TGGT1_321450-t26_1 | gene=TGGT1_321450 | organism=Toxoplasma_gondii_GT1 | gene_product=SANT domain-containing protein [Source:UniProtKB/TrEMBL;Acc:S7VRY8] | transcript_product=Myb family DNA-binding domain-containing protein | location=TGGT1_chrIb:1792947-1808537(+) | protein_length=4220 | sequence_SO=chromosome | SO=protein_coding_gene | is_pseudo=false	0.002	4.044	0	2	2	2	4220	436.3	5.21	0	2	0.665	0.295	0.152	1.105	0.435	0.0170252	0.0147374	0.00119364	0.675946	0.00363327	0.143353	0.118523	0.0113165	0.964904	0.0225368	43.15	24.58	29.03	49.11	93.29	0.997	0.515	0.665	1.062	0.295	0.253	1.044	0.152	0.127	1.105	1.82	0.739	1.173	0.435
FALSE	High	Master Protein	TGGT1_251680-t26_1-p1	transcript=TGGT1_251680-t26_1 | gene=TGGT1_251680 | organism=Toxoplasma_gondii_GT1 | gene_product=TCTP domain-containing protein [Source:UniProtKB/TrEMBL;Acc:A0A125YGX3] | transcript_product=putative histamine-releasing factor | location=TGGT1_chrXII:5449838-5451669(-) | protein_length=171 | sequence_SO=chromosome | SO=protein_coding_gene | is_pseudo=false	0	5.875	11	2	14	2	171	19.2	4.69	15.52	2	0.898	0.847	0.367	1.689	1.008	0.586336	0.847732	0.14348	0.474695	0.730604	0.956627	0.961472	0.651351	0.915333	0.933429	24.04	23.09	87.85	43.8	104.68	0.433	1.072	0.898	0.847	0.149	1.003	0.367	0.183	0.901	1.19	1.689	100	1.008	0.296
FALSE	High	Master Protein	TGGT1_249530-t26_1-p1	transcript=TGGT1_249530-t26_1 | gene=TGGT1_249530 | organism=Toxoplasma_gondii_GT1 | gene_product=Importin N-terminal domain-containing protein [Source:UniProtKB/TrEMBL;Acc:S7V0R9] | transcript_product=putative exportin 1 | location=TGGT1_chrXII:4524784-4539887(+) | protein_length=1125 | sequence_SO=chromosome | SO=protein_coding_gene | is_pseudo=false	0	14.668	6	6	12	6	1125	129	5.74	2.39	6	0.938	0.489	0.425	1.356	1.135	0.782238	0.204263	0.243803	0.896934	0.690153	0.979507	0.689989	0.830689	0.986633	0.918271	0.13	10.57	0.08	21.07	52.83	0.937	0.938	0.946	0.983	0.457	0.489	0.905	0.425	0.425	1.164	1.356	2.697	1.135	0.731
FALSE	Medium	Master Protein	TGGT1_209960-t26_1-p1	transcript=TGGT1_209960-t26_1 | gene=TGGT1_209960 | organism=Toxoplasma_gondii_GT1 | gene_product=Aamy domain-containing protein [Source:UniProtKB/TrEMBL;Acc:A0A125YK23] | transcript_product=glycosyltransferase | location=TGGT1_chrIb:1594537-1608640(+) | protein_length=1707 | sequence_SO=chromosome | SO=protein_coding_gene | is_pseudo=false	0.028	2.102	1	1	1	1	1707	188.8	6.16	2.49	1	2.674	100	100	0.177	1.186	7.6695e-10	1e-17	1e-17	1.06717e-07	0.75379	1.25393e-08	1.60374e-16	1.34062e-16	9.21796e-07	0.940377	0	0	0	1304.65	147.01			2.674	100	100	0.01	100	100	0.01	0.01		3.117	1.186	100
FALSE	High	Master Protein	TGGT1_307850-t26_1-p1	transcript=TGGT1_307850-t26_1 | gene=TGGT1_307850 | organism=Toxoplasma_gondii_GT1 | gene_product=6-phosphogluconate dehydrogenase, decarboxylating [Source:UniProtKB/TrEMBL;Acc:A0A125YFW0] | transcript_product=6-phosphogluconate dehydrogenase | location=TGGT1_chrXII:390090-394283(-) | protein_length=505 | sequence_SO=chromosome | SO=protein_coding_gene | is_pseudo=false	0	8.599	6	3	13	3	505	54.7	7.69	15.02	3	0.911	0.73	0.608	1.469	0.981	0.646405	0.945963	0.658018	0.732326	0.764606	0.965361	0.984815	0.941345	0.969165	0.940377	24.01	13.79	13.44	57.34	26.62	0.691	0.911	1.087	0.872	0.668	0.73	0.558	0.608	0.82	0.901	1.469	2.748	0.832	0.981
FALSE	High	Master Protein	TGGT1_269920-t26_1-p1	transcript=TGGT1_269920-t26_1 | gene=TGGT1_269920 | organism=Toxoplasma_gondii_GT1 | gene_product=Phosphatidylserine decarboxylase 2 proenzyme [Source:UniProtKB/Swiss-Prot;Acc:F6N7K6] | transcript_product=phosphatidylserine decarboxylase | location=TGGT1_chrVIII:5534744-5543165(-) | protein_length=968 | sequence_SO=chromosome | SO=protein_coding_gene | is_pseudo=false	0	66.203	26	20	69	20	968	108	8.92	67.61	20	1.177	0.922	1.097	1.031	1.154	0.263918	0.841391	0.454267	0.546313	0.663345	0.793313	0.957445	0.913155	0.934143	0.903824	13.75	14.94	2.6	4.49	33.17	1.309	1.068	1.177	0.838	1.58	0.922	1.078	1.566	1.097	1.47	1	1.031	1.154	1.719
FALSE	Low	Master Protein	TGGT1_268570-t26_1-p1	transcript=TGGT1_268570-t26_1 | gene=TGGT1_268570 | organism=Toxoplasma_gondii_GT1 | gene_product=Zinc finger (CCCH type) motif-containing protein [Source:UniProtKB/TrEMBL;Acc:S7V581] | transcript_product=zinc finger (CCCH type) motif-containing protein | location=TGGT1_chrVIII:6423572-6428080(-) | protein_length=449 | sequence_SO=chromosome | SO=protein_coding_gene | is_pseudo=false	0.067	1.639	2	1	1	1	449	47.1	8.31	0	1	0.946	0.206	0.194	3.508	0.721	0.820332	0.00053446	0.00603016	0.00765857	0.186368	0.985103	0.00536336	0.0519988	0.0547087	0.526324	10.46	78.17	83.11	11.42	147.19	0.824	0.946	1.018	0.01	0.206	0.435	0.01	0.194	0.442	3.238	3.508	100	0.01	0.721
FALSE	Medium	Master Protein	TGGT1_203910-t26_1-p1	transcript=TGGT1_203910-t26_1 | gene=TGGT1_203910 | organism=Toxoplasma_gondii_GT1 | gene_product=Rab-GAP TBC domain-containing protein [Source:UniProtKB/TrEMBL;Acc:S7WA72] | transcript_product=TBC domain-containing protein | location=TGGT1_chrVIIa:2031779-2041259(-) | protein_length=2113 | sequence_SO=chromosome | SO=protein_coding_gene | is_pseudo=false	0.029	2.078	0	1	1	1	2113	228.6	6.67	0	1		100	100	0.01	100		1e-17	1e-17	1e-17	1e-17		1.60374e-16	1.34062e-16	1.03865e-16	1.03758e-16		0	0	0	0				100	100	100	100	100	100	0.01			1.839	100
FALSE	High	Master Protein	TGGT1_287500-t26_1-p1	transcript=TGGT1_287500-t26_1 | gene=TGGT1_287500 | organism=Toxoplasma_gondii_GT1 | gene_product=Putative T complex chaperonin [Source:UniProtKB/TrEMBL;Acc:S7UPG8] | transcript_product=putative T complex chaperonin | location=TGGT1_chrV:438209-443517(-) | protein_length=556 | sequence_SO=chromosome | SO=protein_coding_gene | is_pseudo=false	0	60.739	39	18	93	18	556	59.3	7.5	77.87	18	1.07	0.703	0.638	1.759	1.149	0.59649	0.535844	0.729518	0.410323	0.679525	0.956627	0.91465	0.971329	0.905347	0.91133	6.03	29.15	14.93	36.77	72.37	0.82	1.113	1.07	0.875	0.37	0.703	0.638	0.347	0.71	1.323	1.759	3.093	1.149	0.588
FALSE	High	Master Protein	TGGT1_298020-t26_1-p1	transcript=TGGT1_298020-t26_1 | gene=TGGT1_298020 | organism=Toxoplasma_gondii_GT1 | gene_product=DEAD-family helicase [Source:UniProtKB/TrEMBL;Acc:S7VTJ1] | transcript_product=DEAD-family helicase | location=TGGT1_chrII:2173899-2186012(+) | protein_length=1158 | sequence_SO=chromosome | SO=protein_coding_gene | is_pseudo=false	0.001	4.312	2	2	2	2	1158	130.9	8.13	0	2	1.159	0.352	0.407	100	100	0.307674	0.0188541	0.210542	1e-17	1e-17	0.841727	0.136676	0.785413	1.03865e-16	1.03758e-16	2.46	12.9	1.12	0	0	1.159	0.972	1.178	0.352	0.422	0.323	0.407	0.411	0.381	100	3.333	100	100	1.407
FALSE	High	Master Protein	TGGT1_242660-t26_1-p1	transcript=TGGT1_242660-t26_1 | gene=TGGT1_242660 | organism=Toxoplasma_gondii_GT1 | gene_product=Vacuolar protein sorting-associated protein 35 [Source:UniProtKB/TrEMBL;Acc:S7USD8] | transcript_product=putative vacuolar sorting protein 35 | location=TGGT1_chrVI:2073553-2082575(-) | protein_length=852 | sequence_SO=chromosome | SO=protein_coding_gene | is_pseudo=false	0	21.544	13	7	11	7	852	95.6	5.76	7.5	7	1.114	0.943	0.951	1.186	1.147	0.435461	0.491002	0.646471	0.818597	0.682658	0.922411	0.909352	0.941345	0.980849	0.912342	32.85	37.17	17.22	42.87	1.87	0.743	1.114	1.361	1.258	0.943	0.563	1.076	0.951	0.525	0.843	1.186	3.616	1.133	1.147
FALSE	Medium	Master Protein	TGGT1_205580-t26_1-p1	transcript=TGGT1_205580-t26_1 | gene=TGGT1_205580 | organism=Toxoplasma_gondii_GT1 | gene_product=Nuclear factor NF4 [Source:UniProtKB/TrEMBL;Acc:A0A125YNJ4] | transcript_product=nuclear factor NF4 | location=TGGT1_chrVIIa:1205711-1209756(+) | protein_length=497 | sequence_SO=chromosome | SO=protein_coding_gene | is_pseudo=false	0.018	2.318	2	1	2	1	497	51.2	8.29	0	1	0.103	0.49	0.072	1	1	1e-17	0.243534	2.05078e-06	0.49359	0.739122	1.73608e-16	0.738772	2.36184e-05	0.915333	0.93417	756.75	0	524.23	7412.26	7412.26	0.01		1.062			0.49	0.01		0.52	0.01		100	0.01
FALSE	High	Master Protein	TGGT1_250710-t26_1-p1	transcript=TGGT1_250710-t26_1 | gene=TGGT1_250710 | organism=Toxoplasma_gondii_GT1 | gene_product=Microneme protein MIC10 [Source:UniProtKB/TrEMBL;Acc:A0A125YLT8] | transcript_product=microneme protein MIC10 | location=TGGT1_chrXII:5071359-5071955(+) | protein_length=198 | sequence_SO=chromosome | SO=protein_coding_gene | is_pseudo=false	0	14.426	24	5	21	5	198	23.1	5.87	30.76	5	0.672	1.068	0.703	1.025	1.002	0.0198927	0.398297	0.88118	0.536637	0.734757	0.164213	0.861472	0.981008	0.934143	0.933661	3.77	30.84	7.6	14.61	110.32	0.655	0.987	0.672	1.068	0.259	1.291	0.703	0.299	0.741	1.025	0.924	100	1.002	0.256
FALSE	High	Master Protein	TGGT1_211040-t26_1-p1	transcript=TGGT1_211040-t26_1 | gene=TGGT1_211040 | organism=Toxoplasma_gondii_GT1 | gene_product=Protein transport protein Sec61 subunit beta [Source:UniProtKB/TrEMBL;Acc:A0A125YP58] | transcript_product=Sec61beta family protein | location=TGGT1_chrIV:1885778-1887505(+) | protein_length=99 | sequence_SO=chromosome | SO=protein_coding_gene | is_pseudo=false	0	5.658	25	2	11	2	99	10.1	10.87	3.69	2	0.924	0.724	0.669	2.55	1.238	0.710693	0.926832	0.802264	0.0695689	0.430798	0.973495	0.977578	0.973927	0.396398	0.80811	35.49	57.67	21.8	48.89	117.4	0.924	1.215	0.662	0.724	0.101	1.185	0.669	0.123	0.784	1.709	2.55	100	1.238	0.258
FALSE	High	Master Protein	TGGT1_297210-t26_1-p1	transcript=TGGT1_297210-t26_1 | gene=TGGT1_297210 | organism=Toxoplasma_gondii_GT1 | gene_product=hypothetical protein | transcript_product=hypothetical protein | location=TGGT1_chrII:1581868-1595298(+) | protein_length=3985 | sequence_SO=chromosome | SO=protein_coding_gene | is_pseudo=false	0	32.591	4	12	13	12	3985	444.7	6.29	16.07	12	1.175	1.78	1.628	0.637	1.184	0.2688	0.0114525	0.122358	0.0588907	0.576316	0.800707	0.093583	0.605957	0.341445	0.873918	3.3	12.82	33.58	8.87	3.86	1.175	1.201	0.885	1.062	1.934	1.78	1.259	2.05	1.628		0.676	0.6	1.153	1.281
FALSE	High	Master Protein	TGGT1_218358-t26_1-p1	transcript=TGGT1_218358-t26_1 | gene=TGGT1_218358 | organism=Toxoplasma_gondii_GT1 | gene_product=Zinc knuckle domain-containing protein [Source:UniProtKB/TrEMBL;Acc:S7WA64] | transcript_product=zinc knuckle domain-containing protein | location=TGGT1_chrXII:1511909-1514768(-) | protein_length=442 | sequence_SO=chromosome | SO=protein_coding_gene | is_pseudo=false	0.003	3.542	3	1	2	1	442	48.5	9.85	0	1	0.912	0.696	0.479	1.308	0.855	0.650916	0.797828	0.355667	0.974652	0.408807	0.965361	0.948316	0.89526	0.995636	0.786379	48.03	32.63	9.72	39.71	72.61	0.912	1.379	0.689	0.893	0.326	0.696	0.814	0.45	0.479	0.957	1.308	2.406	0.855	0.427
FALSE	High	Master Protein	TGGT1_306430-t26_1-p1	transcript=TGGT1_306430-t26_1 | gene=TGGT1_306430 | organism=Toxoplasma_gondii_GT1 | gene_product=SAS-6_N domain-containing protein [Source:UniProtKB/TrEMBL;Acc:S7VQW9] | transcript_product=hypothetical protein | location=TGGT1_chrIX:5848968-5856696(-) | protein_length=1150 | sequence_SO=chromosome | SO=protein_coding_gene | is_pseudo=false	0	112.686	36	32	91	32	1150	123.7	6.42	89.82	32	1.153	0.996	1.147	1.122	1.096	0.323553	0.667114	0.40253	0.705741	0.887777	0.853416	0.930583	0.901174	0.96852	0.974279	3.17	40.81	32.99	23.36	10.51	1.27	1.128	1.153	0.781	1.934	0.996	0.891	2.085	1.147	1.299	0.812	1.122	1.018	1.518
FALSE	High	Master Protein	TGGT1_219540-t26_1-p1	transcript=TGGT1_219540-t26_1 | gene=TGGT1_219540 | organism=Toxoplasma_gondii_GT1 | gene_product=Alanine--tRNA ligase [Source:UniProtKB/TrEMBL;Acc:S7WHV1] | transcript_product=cytosolic tRNA-Ala synthetase | location=TGGT1_chrXII:800723-814444(-) | protein_length=1280 | sequence_SO=chromosome | SO=protein_coding_gene | is_pseudo=false	0	43.434	12	15	62	15	1280	139.3	6.83	42.64	15	0.861	0.64	0.436	1.733	0.809	0.422543	0.366433	0.26392	0.433712	0.113119	0.913831	0.833119	0.83956	0.915333	0.376769	18.39	3.44	39.18	32.99	44.47	0.678	0.983	0.861	0.655	0.339	0.64	0.436	0.293	0.592	1.347	1.733	5.196	0.809	0.622
FALSE	Medium	Master Protein	TGGT1_235490-t26_1-p1	transcript=TGGT1_235490-t26_1 | gene=TGGT1_235490 | organism=Toxoplasma_gondii_GT1 | gene_product=hypothetical protein | transcript_product=hypothetical protein | location=TGGT1_chrX:4794558-4804621(+) | protein_length=923 | sequence_SO=chromosome | SO=protein_coding_gene | is_pseudo=false	0.037	1.889	1	1	2	1	923	102.1	5.41	0	1	0.906	0.68	0.767	1.435	0.78	0.625611	0.754264	0.978894	0.779717	0.233595	0.965361	0.943561	0.995031	0.971965	0.59778	20.25	29.16	28.17	53.07	25.37	0.906	0.798	1.393	0.847	0.464	0.68	0.767	0.37	0.947	0.921	1.435	2.239	0.78	0.666
FALSE	High	Master Protein	TGGT1_313930-t26_1-p1	transcript=TGGT1_313930-t26_1 | gene=TGGT1_313930 | organism=Toxoplasma_gondii_GT1 | gene_product=CRT-like domain-containing protein [Source:UniProtKB/TrEMBL;Acc:S7W2G3] | transcript_product=transmembrane protein | location=TGGT1_chrXI:3773998-3786202(+) | protein_length=881 | sequence_SO=chromosome | SO=protein_coding_gene | is_pseudo=false	0	7.388	6	3	5	3	881	94.8	7.55	0	3	0.952	0.633	0.77	1.4	1.053	0.849572	0.571374	0.973365	0.831294	0.986177	0.985103	0.91465	0.994815	0.980849	0.998944	17.86	0.7	14.95	28.76	29.03	1.222	0.849	0.952	0.63	0.633	0.9	0.77	0.538	0.856	1.671	1.03	1.4	1.053	0.652
FALSE	High	Master Protein	TGGT1_226790-t26_1-p1	transcript=TGGT1_226790-t26_1 | gene=TGGT1_226790 | organism=Toxoplasma_gondii_GT1 | gene_product=ABC transporter, ATP-binding domain-containing protein [Source:UniProtKB/TrEMBL;Acc:S7UXF3] | transcript_product=ABC transporter, ATP-binding domain-containing protein | location=TGGT1_chrX:1266415-1270758(+) | protein_length=1447 | sequence_SO=chromosome | SO=protein_coding_gene | is_pseudo=false	0.008	2.957	1	1	1	1	1447	157.1	7.65	0	1		100	100		100		1e-17	1e-17		1e-17		1.60374e-16	1.34062e-16		1.03758e-16		0	0		0					100			100						100
FALSE	High	Master Protein	TGGT1_226690-t26_1-p1	transcript=TGGT1_226690-t26_1 | gene=TGGT1_226690 | organism=Toxoplasma_gondii_GT1 | gene_product=hypothetical protein | transcript_product=hypothetical protein | location=TGGT1_chrX:1341095-1348983(+) | protein_length=1017 | sequence_SO=chromosome | SO=protein_coding_gene | is_pseudo=false	0	10.347	4	4	5	3	1017	113.7	7.09	5.96	4	1.321	1.055	1.444	1.143	1.234	0.0682492	0.418163	0.192764	0.74388	0.632593	0.377254	0.867127	0.755232	0.971965	0.897666	5.33	33.35	15.8	26.25	26.85	1.321	1.236	1.368	0.01	1.292	1.055	0.01	1.598	1.444	100	1.143	0.941		1.478
FALSE	High	Master Protein	TGGT1_234490-t26_1-p1	transcript=TGGT1_234490-t26_1 | gene=TGGT1_234490 | organism=Toxoplasma_gondii_GT1 | gene_product=SAM_MT_TRM5_TYW2 domain-containing protein [Source:UniProtKB/TrEMBL;Acc:S7UVU6] | transcript_product=kelch repeat-containing protein | location=TGGT1_chrX:4310058-4317471(+) | protein_length=1503 | sequence_SO=chromosome | SO=protein_coding_gene | is_pseudo=false	0.008	2.983	1	1	1	1	1503	164.1	7.59	0	1	1.198	1.033	1.177	1.959	2.023	0.220977	0.579124	0.373604	0.266728	0.116958	0.741285	0.91465	0.89526	0.833155	0.386548	89.21	28.78	7.64	47.94	28.47	1.989	1.198	0.477	0.592	1.033	1.233	1.177	1.237	0.589	100	1.959	1.325	100	2.023
FALSE	High	Master Protein	TGGT1_217540-t26_1-p1	transcript=TGGT1_217540-t26_1 | gene=TGGT1_217540 | organism=Toxoplasma_gondii_GT1 | gene_product=RNA recognition motif-containing protein [Source:UniProtKB/TrEMBL;Acc:S7WAA2] | transcript_product=RNA recognition motif-containing protein | location=TGGT1_chrXII:1835563-1837479(-) | protein_length=351 | sequence_SO=chromosome | SO=protein_coding_gene | is_pseudo=false	0	14.957	22	6	19	6	351	38.1	9.61	8.17	6	0.719	0.485	0.51	1.811	0.902	0.0562999	0.194913	0.425351	0.367901	0.466029	0.338139	0.674334	0.904295	0.882234	0.830108	35.57	0.18	6.3	30.32	50.91	0.496	0.946	0.719	0.858	0.485	0.484	0.533	0.51	0.382	1.811	1.227	2.181	0.902	0.668
FALSE	Low	Master Protein	TGGT1_305930-t26_1-p1	transcript=TGGT1_305930-t26_1 | gene=TGGT1_305930 | organism=Toxoplasma_gondii_GT1 | gene_product=hypothetical protein | transcript_product=hypothetical protein | location=TGGT1_chrIX:5457389-5459694(-) | protein_length=234 | sequence_SO=chromosome | SO=protein_coding_gene | is_pseudo=false	0.059	1.697	10	1	1	1	234	26.1	6.84	0	1	9.263	0.01	1	100	100	1e-17	1e-17	0.574836	1e-17	1e-17	1.73608e-16	1.60374e-16	0.926406	1.03865e-16	1.03758e-16	793.4	0	7412.26	0	0	0.858		100	0.01	100	0.01	0.01	100		100		100		100
FALSE	High	Master Protein	TGGT1_320100-t26_1-p1	transcript=TGGT1_320100-t26_1 | gene=TGGT1_320100 | organism=Toxoplasma_gondii_GT1 | gene_product=RNA recognition motif-containing protein [Source:UniProtKB/TrEMBL;Acc:S7VYK2] | transcript_product=RNA recognition motif-containing protein | location=TGGT1_chrIV:443805-449909(+) | protein_length=1216 | sequence_SO=chromosome | SO=protein_coding_gene | is_pseudo=false	0	97.95	34	28	129	28	1216	128.8	8.5	130.35	28	1.004	0.738	1.057	1.43	1.121	0.889683	0.637169	0.500462	0.787368	0.786546	0.985103	0.922967	0.926268	0.973268	0.946258	7.44	0.48	35.21	1.06	0.04	1.294	0.954	1.004	0.736	1.426	0.738	1.057	1.309	0.708	1.44	1.014	1.43	1.121	1.443
FALSE	High	Master Protein	TGGT1_275690-t26_1-p1	transcript=TGGT1_275690-t26_1 | gene=TGGT1_275690 | organism=Toxoplasma_gondii_GT1 | gene_product=Putative ClpB [Source:UniProtKB/TrEMBL;Acc:S7UMM6] | transcript_product=putative ClpB | location=TGGT1_chrIII:255659-267189(+) | protein_length=1022 | sequence_SO=chromosome | SO=protein_coding_gene | is_pseudo=false	0	75.884	32	26	87	26	1022	114.5	7.9	76.43	26	0.999	1.084	1.074	1.183	1.051	0.911055	0.492327	0.480879	0.81365	0.925252	0.985103	0.909352	0.925099	0.980849	0.980816	20.24	26.35	21.41	8.02	11.15	0.879	0.999	1.215	1.084	1.384	0.891	0.873	1.229	1.074	1.183	0.897	1.247	1.051	1.373
FALSE	High	Master Protein	TGGT1_202890-t26_1-p1	transcript=TGGT1_202890-t26_1 | gene=TGGT1_202890 | organism=Toxoplasma_gondii_GT1 | gene_product=hypothetical protein | transcript_product=hypothetical protein | location=TGGT1_chrVIIa:2858390-2859523(-) | protein_length=377 | sequence_SO=chromosome | SO=protein_coding_gene | is_pseudo=false	0.004	3.438	3	1	3	1	377	39.3	4.86	6.19	1	1.111	0.311	0.276	3.972	1.073	0.446462	0.01733	0.0418875	0.00271539	0.87445	0.924736	0.131585	0.285566	0.0204318	0.97132	45.7	75.85	57.54	19.43	120.21	1.454	1.111	0.434	0.311	0.044	0.637	0.452	0.049	0.276	3.451	4.575	3.972	1.073	0.203
FALSE	Low	Master Protein	TGGT1_318580-t26_1-p1	transcript=TGGT1_318580-t26_1 | gene=TGGT1_318580 | organism=Toxoplasma_gondii_GT1 | gene_product=Glucosephosphate-mutase GPM2 [Source:UniProtKB/TrEMBL;Acc:A0A125YJC3] | transcript_product=glucosephosphate-mutase GPM2 | location=TGGT1_chrIV:1153980-1159087(-) | protein_length=597 | sequence_SO=chromosome | SO=protein_coding_gene | is_pseudo=false	0.062	1.674	2	1	1	1	597	65.9	5.17	0	1	1.031	1.03	1.404	1.024	1.329	0.760162	0.45754	0.212771	0.534103	0.213105	0.978747	0.8874	0.788752	0.934143	0.569863	8.17	31.76	0.85	6.88	5.86	1.031	0.975	1.37	1.361	0.81	1.03	1.404	0.789	1.412	0.976	1.024	1.341	1.329	0.829
FALSE	High	Master Protein	TGGT1_247390-t26_1-p1	transcript=TGGT1_247390-t26_1 | gene=TGGT1_247390 | organism=Toxoplasma_gondii_GT1 | gene_product=AAA domain-containing protein [Source:UniProtKB/TrEMBL;Acc:S7V105] | transcript_product=ATPase, AAA family protein | location=TGGT1_chrXII:3240940-3256254(+) | protein_length=3915 | sequence_SO=chromosome | SO=protein_coding_gene | is_pseudo=false	0.001	5.101	1	2	2	2	3915	422.2	5.63	0	2	100	1	100	1.959	1	1e-17	0.553563	1e-17	0.266602	0.697678	1.73608e-16	0.91465	1.34062e-16	0.833155	0.921624	0	7412.26	0	0	7412.26			100		100	0.01		100				1.959		100
FALSE	Medium	Master Protein	TGGT1_280740-t26_1-p1	transcript=TGGT1_280740-t26_1 | gene=TGGT1_280740 | organism=Toxoplasma_gondii_GT1 | gene_product=Signal peptidase I [Source:UniProtKB/TrEMBL;Acc:A0A125YQA0] | transcript_product=signal peptidase | location=TGGT1_chrVIIa:110222-113066(-) | protein_length=223 | sequence_SO=chromosome | SO=protein_coding_gene | is_pseudo=false	0.027	2.121	4	1	1	1	223	24.6	8.27	0	1	1.028	1.031	1.06	1.289	1.329	0.773937	0.417383	0.497067	0.994403	0.437847	0.979499	0.867127	0.926268	0.996169	0.810372	11.31	26.86	51.87	26.12	48.24	1.028	0.757	1.107	1.031	0.844	1.293	1.06	0.639	1.431	1.289	1.062	3.966	1.329	0.896
FALSE	High	Master Protein	TGGT1_409080-t26_1-p1	transcript=TGGT1_409080-t26_1 | gene=TGGT1_409080 | organism=Toxoplasma_gondii_GT1 | gene_product=hypothetical protein | transcript_product=hypothetical protein | location=AAQM03000111:94-1737(-) | protein_length=548 | sequence_SO=contig | SO=protein_coding_gene | is_pseudo=false	0	13.097	26	4	20	2	548	54.2	8.79	23.71	4	1.457	1.966	0.375	0.951	1.508	0.015283	0.00523843	0.155412	0.413038	0.0938071	0.134746	0.0470636	0.685572	0.905347	0.334052	40.9	0	0	88.9	44.18	1.457	1.859	0.374			1.966			0.375		1.679	0.539	2.002	1.508
FALSE	High	Master Protein	TGGT1_214770-t26_1-p1	transcript=TGGT1_214770-t26_1 | gene=TGGT1_214770 | organism=Toxoplasma_gondii_GT1 | gene_product=Putative small GTP binding protein rab1a [Source:UniProtKB/TrEMBL;Acc:S7W5S1] | transcript_product=putative small GTP binding protein rab1a | location=TGGT1_chrX:6376684-6380380(+) | protein_length=202 | sequence_SO=chromosome | SO=protein_coding_gene | is_pseudo=false	0	8.242	17	4	12	3	202	22.9	7.72	5.92	4	0.825	0.717	0.594	1.507	0.998	0.287361	0.907415	0.623338	0.681037	0.824341	0.812776	0.974587	0.93387	0.967278	0.958229	10.94	47.44	4.03	35.03	69.36	0.685	0.891	0.825	1.055	0.377	0.717	0.594	0.285	0.61	1.151	1.507	2.977	0.998	0.68
FALSE	High	Master Protein	TGGT1_209600-t26_1-p1	transcript=TGGT1_209600-t26_1 | gene=TGGT1_209600 | organism=Toxoplasma_gondii_GT1 | gene_product=hypothetical protein | transcript_product=hypothetical protein | location=TGGT1_chrIb:1372263-1374087(-) | protein_length=451 | sequence_SO=chromosome | SO=protein_coding_gene | is_pseudo=false	0	33.239	22	11	59	11	451	50.2	5.3	81.19	11	0.88	0.715	0.741	1.079	1.22	0.503308	0.568331	0.964723	0.630754	0.450721	0.942037	0.91465	0.994815	0.950029	0.819828	32.35	56.54	24.33	39.3	29.81	0.722	1.139	0.88	1.504	0.517	0.715	1.091	0.637	0.741	0.793	1.079	1.862	1.22	0.52
FALSE	High	Master Protein	TGGT1_204400-t26_1-p1	transcript=TGGT1_204400-t26_1 | gene=TGGT1_204400 | organism=Toxoplasma_gondii_GT1 | gene_product=ATP synthase subunit alpha [Source:UniProtKB/TrEMBL;Acc:S7UU80] | transcript_product=putative ATPase synthase subunit alpha | location=TGGT1_chrVIIa:1716199-1723634(+) | protein_length=577 | sequence_SO=chromosome | SO=protein_coding_gene | is_pseudo=false	0	47.766	28	17	65	17	577	62.1	8.37	63.2	17	0.917	0.791	0.562	1.313	1.074	0.677789	0.792229	0.546668	0.966098	0.979302	0.969375	0.945424	0.926406	0.995636	0.997174	0.02	26.22	25.08	18.88	48.38	0.657	0.917	0.917	0.961	0.478	0.791	0.562	0.408	0.676	1.146	1.313	1.712	1.074	0.633
FALSE	High	Master Protein	TGGT1_314430-t26_1-p1	transcript=TGGT1_314430-t26_1 | gene=TGGT1_314430 | organism=Toxoplasma_gondii_GT1 | gene_product=TYR_PHOSPHATASE_2 domain-containing protein [Source:UniProtKB/TrEMBL;Acc:S7W2B2] | transcript_product=serine/threonine specific protein phosphatase | location=TGGT1_chrXI:4063083-4067125(+) | protein_length=479 | sequence_SO=chromosome | SO=protein_coding_gene | is_pseudo=false	0.001	5.069	4	2	2	2	479	53.7	8.51	2.1	2	1.176	0.1	0.927	100	13.369	0.266188	5.20998e-07	0.683215	1e-17	1e-17	0.794787	6.4785e-06	0.945617	1.03865e-16	1.03758e-16	14.17	734.38	69.48	0	544.59	100	1.176	1.064	0.01	1.001			1.458	0.589	100	1.356	100		1.787
FALSE	High	Master Protein	TGGT1_271090-t26_1-p1	transcript=TGGT1_271090-t26_1 | gene=TGGT1_271090 | organism=Toxoplasma_gondii_GT1 | gene_product=hypothetical protein | transcript_product=hypothetical protein | location=TGGT1_chrVIII:4726280-4732500(-) | protein_length=1272 | sequence_SO=chromosome | SO=protein_coding_gene | is_pseudo=false	0.003	3.58	1	1	1	1	1272	139.8	8.65	0	1	9.721	1.137	10.367	100	12.859	1e-17	0.362729	1.27363e-07	1e-17	6.82121e-13	1.73608e-16	0.833119	1.53912e-06	1.03865e-16	6.14627e-12	755.38	146.96	707.4	0	566.96	100		0.945	0.01	100	1.137		100	1.075	100	0.01	100		1.654
FALSE	High	Master Protein	TGGT1_410360-t26_1-p1	transcript=TGGT1_410360-t26_1 | gene=TGGT1_410360 | organism=Toxoplasma_gondii_GT1 | gene_product=Putative transmembrane protein [Source:UniProtKB/TrEMBL;Acc:S7ULN4] | transcript_product=putative transmembrane protein | location=TGGT1_chrII:71310-72374(+) | protein_length=354 | sequence_SO=chromosome | SO=protein_coding_gene | is_pseudo=false	0	45.255	33	12	76	5	354	38.1	6.11	93.33	12	0.981	0.739	0.757	1.459	1.487	0.999356	0.638872	0.999983	0.746445	0.060668	0.999356	0.923073	0.999983	0.971965	0.255193	4.18	8.68	11.06	23.24	2.2	0.935	0.981	1.01	0.739	1.125	0.698	0.849	0.757	0.705	1.459	1.23	2.01	1.098	1.509
FALSE	High	Master Protein	TGGT1_215100-t26_1-p1	transcript=TGGT1_215100-t26_1 | gene=TGGT1_215100 | organism=Toxoplasma_gondii_GT1 | gene_product=ATP_bind_3 domain-containing protein [Source:UniProtKB/TrEMBL;Acc:S7UQ02] | transcript_product=PP-loop family protein | location=TGGT1_chrX:6648740-6657114(-) | protein_length=2420 | sequence_SO=chromosome | SO=protein_coding_gene | is_pseudo=false	0	45.611	9	16	18	16	2420	260.4	8.85	11.48	16	0.909	1.2	1.262	0.9	0.923	0.63738	0.190703	0.302485	0.334338	0.413104	0.965361	0.670588	0.873918	0.86944	0.790206	6.22	27.24	2.11	11.59	2.68	1.476	0.909	0.872	0.979	1.439	1.2	1.28	1.262	1.022	0.977	0.9	0.695	0.907	1.333
FALSE	High	Master Protein	TGGT1_242790A-t26_1-p1	transcript=TGGT1_242790A-t26_1 | gene=TGGT1_242790A | organism=Toxoplasma_gondii_GT1 | gene_product=Putative trichohyalin [Source:UniProtKB/TrEMBL;Acc:S7W721] | transcript_product=putative trichohyalin | location=TGGT1_chrVI:2195987-2203778(+) | protein_length=693 | sequence_SO=chromosome | SO=protein_coding_gene | is_pseudo=false	0	31.897	24	11	36	10	693	81.3	6.89	41.75	11	1.034	1.034	1	1.137	1.234	0.750799	0.585667	0.574955	0.73182	0.415149	0.973495	0.91465	0.926406	0.969165	0.791464	1.48	19.57	1	23.84	14.42	1.034	1.023	1.096	0.89	1.034	1.171	1	1.03	0.993	1.319	0.82	1.137	1.354	0.847
FALSE	Medium	Master Protein	TGGT1_258710-t26_1-p1	transcript=TGGT1_258710-t26_1 | gene=TGGT1_258710 | organism=Toxoplasma_gondii_GT1 | gene_product=Tcp10_C domain-containing protein [Source:UniProtKB/TrEMBL;Acc:S7WEX5] | transcript_product=T-complex protein 10 domain-containing protein | location=TGGT1_chrVIIb:3194888-3203803(-) | protein_length=1731 | sequence_SO=chromosome | SO=protein_coding_gene | is_pseudo=false	0.035	1.947	1	1	1	1	1731	189.8	7.18	0	1	0.083	100	1.882	0.084	1.912	1e-17	1e-17	0.0661097	2.80886e-13	0.122639	1.73608e-16	1.60374e-16	0.403716	2.7973e-12	0.399521	607.79	0	77	612.73	18.51	0.01	0.692		100	2.719	100	0.905	1.882	100		0.703	0.01	100	1.912
FALSE	High	Master Protein	TGGT1_287210-t26_1-p1	transcript=TGGT1_287210-t26_1 | gene=TGGT1_287210 | organism=Toxoplasma_gondii_GT1 | gene_product=Proteasome endopeptidase complex [Source:UniProtKB/TrEMBL;Acc:A0A125YFE8] | transcript_product=putative proteasome subunit alpha2 | location=TGGT1_chrV:1378941-1381792(-) | protein_length=236 | sequence_SO=chromosome | SO=protein_coding_gene | is_pseudo=false	0	11.93	21	4	11	4	236	25.9	5.33	6.21	4	1.175	0.466	0.489	1.738	0.707	0.269499	0.139567	0.378098	0.429043	0.0982854	0.800707	0.570394	0.896155	0.914823	0.344804	7.89	27.23	34.9	55.08	1.9	0.665	1.175	1.237	0.743	0.393	0.466	0.396	0.841	0.489	1.092	1.738	100	0.707	0.698
FALSE	Medium	Master Protein	TGGT1_252440-t26_1-p1	transcript=TGGT1_252440-t26_1 | gene=TGGT1_252440 | organism=Toxoplasma_gondii_GT1 | gene_product=Peptidase c13 family protein [Source:UniProtKB/TrEMBL;Acc:S7VW45] | transcript_product=peptidase c13 family protein | location=TGGT1_chrIII:556677-558320(-) | protein_length=547 | sequence_SO=chromosome | SO=protein_coding_gene | is_pseudo=false	0.045	1.787	3	1	1	1	547	59.7	7.37	0	1	100	1	100	100	100	1e-17	0.622145	1e-17	1e-17	1e-17	1.73608e-16	0.920342	1.34062e-16	1.03865e-16	1.03758e-16	0	7412.26	0	0	0			100		100	0.01		100				100		100
FALSE	High	Master Protein	TGGT1_266070-t26_1-p1	transcript=TGGT1_266070-t26_1 | gene=TGGT1_266070 | organism=Toxoplasma_gondii_GT1 | gene_product=Ribosomal protein RPL31 [Source:UniProtKB/TrEMBL;Acc:A0A125YYY2] | transcript_product=ribosomal protein RPL31 | location=TGGT1_chrIX:1142823-1144192(+) | protein_length=120 | sequence_SO=chromosome | SO=protein_coding_gene | is_pseudo=false	0	10.971	33	4	10	4	120	14.3	10.68	3.56	4	0.959	1.012	0.634	1.13	1.2	0.885858	0.631794	0.718772	0.719754	0.511092	0.985103	0.920368	0.969176	0.96852	0.851157	11.21	11.28	6.84	2.66	24.05	1.037	0.959	0.692	1.089	0.697	1.012	1.221	0.606	0.634	1.11	1.13	1.612	1.2	0.652
FALSE	High	Master Protein	TGGT1_285210-t26_1-p1	transcript=TGGT1_285210-t26_1 | gene=TGGT1_285210 | organism=Toxoplasma_gondii_GT1 | gene_product=hypothetical protein | transcript_product=hypothetical protein | location=TGGT1_chrV:2381571-2391388(+) | protein_length=1264 | sequence_SO=chromosome | SO=protein_coding_gene | is_pseudo=false	0	56.869	19	19	34	19	1264	138.2	6.39	30.92	19	1.215	1.048	1.19	1.145	1.12	0.189361	0.559023	0.361269	0.747061	0.788732	0.685772	0.91465	0.89526	0.971965	0.946258	4.32	29.77	14.78	16.91	16.77	1.481	1.215	1.18	0.837	1.429	1.048	1.19	1.717	1.072	1.276	1.01	1.145	0.994	1.459
FALSE	High	Master Protein	TGGT1_265450-t26_1-p1	transcript=TGGT1_265450-t26_1 | gene=TGGT1_265450 | organism=Toxoplasma_gondii_GT1 | gene_product=Phosphotransferase [Source:UniProtKB/TrEMBL;Acc:S7UI28] | transcript_product=hexokinase | location=TGGT1_chrIX:1363173-1366449(-) | protein_length=468 | sequence_SO=chromosome | SO=protein_coding_gene | is_pseudo=false	0	35.08	22	10	58	10	468	51.4	6.23	48.17	10	0.858	0.568	0.521	1.354	1.076	0.409934	0.207437	0.450206	0.90114	0.970202	0.91043	0.691187	0.91103	0.986691	0.99592	6.31	19.16	10.25	29.39	55.46	0.858	1.08	0.823	0.996	0.503	0.568	0.662	0.521	0.487	1.085	1.354	3.593	1.076	0.673
FALSE	High	Master Protein	TGGT1_289800-t26_1-p1	transcript=TGGT1_289800-t26_1 | gene=TGGT1_289800 | organism=Toxoplasma_gondii_GT1 | gene_product=GOLD domain-containing protein [Source:UniProtKB/TrEMBL;Acc:A0A125YFZ5] | transcript_product=hypothetical protein | location=TGGT1_chrIX:3269328-3270032(+) | protein_length=234 | sequence_SO=chromosome | SO=protein_coding_gene | is_pseudo=false	0	12.921	17	4	18	4	234	25.9	9.72	24.55	4	0.969	1.163	0.824	0.899	1.164	0.939596	0.306731	0.864614	0.332349	0.641151	0.987135	0.795064	0.981008	0.86944	0.897666	19.57	48.57	23.38	28.48	17.18	0.556	0.969	1.117	1.544	1.163	0.637	0.824	1.319	0.712	0.754	0.899	1.19	1.164	1.299
FALSE	High	Master Protein	TGGT1_269180-t26_1-p1	transcript=TGGT1_269180-t26_1 | gene=TGGT1_269180 | organism=Toxoplasma_gondii_GT1 | gene_product=MIF4G domain-containing protein [Source:UniProtKB/TrEMBL;Acc:S7WKZ1] | transcript_product=MIF4G domain-containing protein | location=TGGT1_chrVIII:6008955-6021323(-) | protein_length=2668 | sequence_SO=chromosome | SO=protein_coding_gene | is_pseudo=false	0	101.615	17	32	82	32	2668	272.9	9.25	69.59	32	1.211	0.84	1.152	1.663	1.441	0.196981	0.934576	0.397429	0.500208	0.0892254	0.695598	0.978794	0.901174	0.915333	0.327505	22.11	14.62	9.31	20.99	3.98	1.643	1.211	1.03	0.84	0.932	0.488	1.224	1.152	0.534	1.663	1.428	2.717	1.48	1.302
FALSE	High	Master Protein	TGGT1_209910-t26_1-p1	transcript=TGGT1_209910-t26_1 | gene=TGGT1_209910 | organism=Toxoplasma_gondii_GT1 | gene_product=Histone H2B [Source:UniProtKB/TrEMBL;Acc:A0A125YMF4] | transcript_product=histone H2Bv | location=TGGT1_chrIb:1562803-1563174(+) | protein_length=123 | sequence_SO=chromosome | SO=protein_coding_gene | is_pseudo=false	0	7.86	28	3	9	3	123	13.7	10.55	0	3	0.861	0.495	0.31	2.033	0.907	0.422576	0.0928649	0.0716553	0.22635	0.379753	0.913831	0.455303	0.431951	0.781665	0.762053	30.13	16.67	53.41	14.51	127.49	0.861	1.081	0.461	0.495	0.122	0.557	0.485	0.114	0.31	1.834	2.033	10.612	0.907	0.248
FALSE	High	Master Protein	TGGT1_232150-t26_1-p1	transcript=TGGT1_232150-t26_1 | gene=TGGT1_232150 | organism=Toxoplasma_gondii_GT1 | gene_product=hypothetical protein | transcript_product=hypothetical protein | location=TGGT1_chrVIII:1884936-1895884(+) | protein_length=976 | sequence_SO=chromosome | SO=protein_coding_gene | is_pseudo=false	0.008	2.911	2	1	1	1	976	107.5	5.77	0	1
FALSE	High	Master Protein	TGGT1_223920-t26_1-p1	transcript=TGGT1_223920-t26_1 | gene=TGGT1_223920 | organism=Toxoplasma_gondii_GT1 | gene_product=Rhoptry neck protein RON3 [Source:UniProtKB/TrEMBL;Acc:S7UWM8] | transcript_product=rhoptry neck protein RON3 | location=TGGT1_chrX:3357300-3367973(+) | protein_length=1958 | sequence_SO=chromosome | SO=protein_coding_gene | is_pseudo=false	0	147.428	27	46	211	46	1958	222.9	9.16	189.2	46	0.986	0.778	0.811	1.033	1.038	0.979405	0.754547	0.889441	0.549888	0.86583	0.99495	0.943561	0.981398	0.934699	0.969164	0.84	12.26	5.4	18.44	31.97	0.825	0.986	0.991	1.144	0.719	0.778	0.94	0.783	0.811	0.905	1.033	1.566	1.038	0.777
FALSE	High	Master Protein	TGGT1_238050-t26_1-p1	transcript=TGGT1_238050-t26_1 | gene=TGGT1_238050 | organism=Toxoplasma_gondii_GT1 | gene_product=Nuclease and tudor domain-containing protein [Source:UniProtKB/TrEMBL;Acc:S7URW3] | transcript_product=nuclease and tudor domain-containing protein | location=TGGT1_chrVI:31087-39926(+) | protein_length=1024 | sequence_SO=chromosome | SO=protein_coding_gene | is_pseudo=false	0	44.364	20	16	54	16	1024	114.2	8.31	26.36	16	1.002	0.727	0.52	1.342	0.778	0.898532	0.605455	0.44748	0.920439	0.0707035	0.985103	0.91465	0.909805	0.990374	0.283773	12.22	2.03	47.83	25.62	40.84	0.716	1.002	1.085	0.727	0.402	0.738	0.52	0.39	0.768	1.11	1.342	2.461	0.778	0.61
FALSE	Medium	Master Protein	TGGT1_306020-t26_1-p1	transcript=TGGT1_306020-t26_1 | gene=TGGT1_306020 | organism=Toxoplasma_gondii_GT1 | gene_product=hypothetical protein | transcript_product=hypothetical protein | location=TGGT1_chrIX:5506123-5536326(+) | protein_length=8858 | sequence_SO=chromosome | SO=protein_coding_gene | is_pseudo=false	0.035	1.931	0	1	1	1	8858	953.9	8.27	0	1	1.223	0.01	0.01	2.183	0.091	0.176846	1e-17	1e-17	0.161649	1e-17	0.661798	1.60374e-16	1.34062e-16	0.651322	1.03758e-16	0.65	0	0	7.68	666.78	1.218	1.223	1.72	0.01	0.01	0.38	0.01	0.01	0.653	100	2.07	2.183		0.01
FALSE	High	Master Protein	TGGT1_247520-t26_1-p1	transcript=TGGT1_247520-t26_1 | gene=TGGT1_247520 | organism=Toxoplasma_gondii_GT1 | gene_product=hypothetical protein | transcript_product=hypothetical protein | location=TGGT1_chrXII:3323216-3323986(-) | protein_length=256 | sequence_SO=chromosome | SO=protein_coding_gene | is_pseudo=false	0	10.295	19	2	11	2	256	26.3	11.06	19.29	2	1.158	0.609	0.618	2.064	0.882	0.310575	0.364478	0.682359	0.211418	0.303854	0.8432	0.833119	0.945617	0.756724	0.681227	20.58	94.9	34.07	13.88	114.01	1.318	1.158	0.365	0.609	0.205	1.692	0.803	0.238	0.618	1.449	2.064	2.257	0.882	0.423
FALSE	High	Master Protein	TGGT1_220370-t26_1-p1	transcript=TGGT1_220370-t26_1 | gene=TGGT1_220370 | organism=Toxoplasma_gondii_GT1 | gene_product=hypothetical protein | transcript_product=hypothetical protein | location=TGGT1_chrV:236903-240526(+) | protein_length=1207 | sequence_SO=chromosome | SO=protein_coding_gene | is_pseudo=false	0	8.456	3	3	4	3	1207	134.1	9.11	0	3	1.029	0.778	0.657	1.214	2.279	0.772233	0.963762	0.774921	0.866849	0.000371312	0.979499	0.990309	0.972757	0.986633	0.00254274	14.11	15.02	17.84	21.41	100.55	0.931	1.029	1.435	0.706	1.569	0.778	0.657	0.587	0.84	1.038	1.214	10.314	0.733	2.279
FALSE	High	Master Protein	TGGT1_281650-t26_1-p1	transcript=TGGT1_281650-t26_1 | gene=TGGT1_281650 | organism=Toxoplasma_gondii_GT1 | gene_product=hypothetical protein | transcript_product=hypothetical protein | location=TGGT1_chrVIIa:4147446-4149734(-) | protein_length=655 | sequence_SO=chromosome | SO=protein_coding_gene | is_pseudo=false	0	30.138	19	10	37	10	655	70.7	8.63	18.87	10	1.249	1.265	1.622	0.982	1.219	0.138705	0.247348	0.124328	0.463083	0.454252	0.590421	0.738772	0.607965	0.915333	0.821658	10.37	59.54	35.61	56.9	2.65	1.249	0.893	1.337	0.757	1.799	1.265	0.877	2.011	1.622	1.593	0.708	0.982	1.219	1.408
FALSE	High	Master Protein	TGGT1_299190-t26_1-p1	transcript=TGGT1_299190-t26_1 | gene=TGGT1_299190 | organism=Toxoplasma_gondii_GT1 | gene_product=B-box zinc finger domain-containing protein [Source:UniProtKB/TrEMBL;Acc:S7UN50] | transcript_product=B-box zinc finger domain-containing protein | location=TGGT1_chrIII:2106784-2109039(+) | protein_length=751 | sequence_SO=chromosome | SO=protein_coding_gene | is_pseudo=false	0	30.516	14	10	25	10	751	81.4	4.91	26.92	10	1.23	0.947	1.144	1.257	1.372	0.166466	0.619256	0.404982	0.941089	0.174336	0.64002	0.920342	0.901174	0.993926	0.505431	4.64	29.11	13.07	16.65	53.89	1.23	0.88	1.268	0.651	0.947	1.179	1.043	1.144	1.483	1.398	0.796	1.257	1.372	0.834
FALSE	High	Master Protein	TGGT1_219790A-t26_1-p1	transcript=TGGT1_219790A-t26_1 | gene=TGGT1_219790A | organism=Toxoplasma_gondii_GT1 | gene_product=Pre-mRNA processing factor PRP3 [Source:UniProtKB/TrEMBL;Acc:S7V290] | transcript_product=pre-mRNA processing factor PRP3 | location=TGGT1_chrXII:588219-589616(-) | protein_length=304 | sequence_SO=chromosome | SO=protein_coding_gene | is_pseudo=false	0.001	4.925	8	2	8	2	304	32.9	10.37	0	2	0.697	0.447	0.386	2.463	1.088	0.035404	0.104657	0.172975	0.0850496	0.992962	0.249457	0.496109	0.722853	0.445786	0.999418	6.62	1.63	28.51	13.56	15.34	0.667	0.873	0.697	0.716	0.442	0.447	0.477	0.386	0.31	1.018	2.463	2.688	0.874	1.088
FALSE	Medium	Master Protein	TGGT1_265180-t26_1-p1	transcript=TGGT1_265180-t26_1 | gene=TGGT1_265180 | organism=Toxoplasma_gondii_GT1 | gene_product=hypothetical protein | transcript_product=hypothetical protein | location=TGGT1_chrIX:1546295-1548023(-) | protein_length=452 | sequence_SO=chromosome | SO=protein_coding_gene | is_pseudo=false	0.021	2.208	3	1	1	1	452	48.3	6.81	0	1	0.807	0.918	0.712	1.379	1.266	0.230793	0.668716	0.900155	0.862475	0.671938	0.756101	0.931163	0.985048	0.986604	0.90874	6.2	11.22	4.83	33.56	49.07	0.775	0.807	0.856	0.918	0.854	1.141	0.712	0.689	0.977	1.379	0.992	1.691	1.266	0.847
FALSE	High	Master Protein	TGGT1_235970-t26_1-p1	transcript=TGGT1_235970-t26_1 | gene=TGGT1_235970 | organism=Toxoplasma_gondii_GT1 | gene_product=Tr-type G domain-containing protein [Source:UniProtKB/TrEMBL;Acc:A0A125YRD1] | transcript_product=putative eukaryotic initiation factor-2 gamma | location=TGGT1_chrX:5097473-5103737(+) | protein_length=465 | sequence_SO=chromosome | SO=protein_coding_gene | is_pseudo=false	0	28.651	28	10	52	10	465	50.5	8.21	49.84	10	0.926	0.64	0.569	2.265	0.879	0.722481	0.366624	0.564448	0.134162	0.265869	0.973495	0.833119	0.926406	0.608504	0.64018	13.72	11.3	20.05	46.26	90.49	0.926	1.021	0.823	0.64	0.207	0.693	0.569	0.21	0.658	1.351	2.265	2.971	0.879	0.472
FALSE	High	Master Protein	TGGT1_258640-t26_1-p1	transcript=TGGT1_258640-t26_1 | gene=TGGT1_258640 | organism=Toxoplasma_gondii_GT1 | gene_product=Adenylate kinase superfamily protein [Source:UniProtKB/TrEMBL;Acc:S7UYQ9] | transcript_product=adenylate kinase superfamily protein | location=TGGT1_chrVIIb:3253957-3256497(+) | protein_length=569 | sequence_SO=chromosome | SO=protein_coding_gene | is_pseudo=false	0	16.709	12	5	17	5	569	61.2	9.06	17.03	5	1.088	0.608	0.606	1.99	0.812	0.528545	0.488946	0.652862	0.249036	0.178577	0.942037	0.909352	0.941345	0.806249	0.5121	20.26	8.74	11.04	14.03	23.69	1.486	0.939	1.088	0.608	0.646	0.519	0.749	0.606	0.564	1.405	2.178	1.99	0.812	1.312
FALSE	High	Master Protein	TGGT1_305920-t26_1-p1	transcript=TGGT1_305920-t26_1 | gene=TGGT1_305920 | organism=Toxoplasma_gondii_GT1 | gene_product=Endonuclease III homolog [Source:UniProtKB/TrEMBL;Acc:S7VQV5] | transcript_product=endonuclease III family 1 protein | location=TGGT1_chrIX:5449193-5455691(+) | protein_length=693 | sequence_SO=chromosome | SO=protein_coding_gene | is_pseudo=false	0	8.049	7	3	3	3	693	75.8	9.26	3.53	3	1.859	1.141	2.121	1.213	1.441	8.83681e-05	0.366291	0.0376184	0.866625	0.478392	0.0011905	0.833119	0.265651	0.986633	0.838288	108.09	2.85	108.86	12.7	18.03	1.859	100	0.504	1.141	1.188	1.119	2.121	100	0.564	1.11	1.213	100	1.266	1.441
FALSE	High	Master Protein	TGGT1_300641B-t26_1-p1	transcript=TGGT1_300641B-t26_1 | gene=TGGT1_300641B | organism=Toxoplasma_gondii_GT1 | gene_product=S4 RNA-binding domain-containing protein [Source:UniProtKB/TrEMBL;Acc:S7VU68] | transcript_product=ribosomal protein S4 | location=AAQM03000552:669-1265(-) | protein_length=198 | sequence_SO=apicoplast_chromosome | SO=protein_coding_gene | is_pseudo=false	0.002	3.636	6	1	3	1	198	24.4	10.04	4.63	1	0.994	0.785	1.571	2.084	2.805	0.936277	0.907919	0.140708	0.202139	8.9109e-06	0.987135	0.974587	0.643882	0.737232	6.54741e-05	115.4	74.57	147.32	21.95	147.73	100	0.994	0.559	0.785	1.58	0.01	100	1.571	0.01	100	1.775	2.084	100	2.805
FALSE	High	Master Protein	TGGT1_244380-t26_1-p1	transcript=TGGT1_244380-t26_1 | gene=TGGT1_244380 | organism=Toxoplasma_gondii_GT1 | gene_product=Cactin [Source:UniProtKB/TrEMBL;Acc:S7VMZ6] | transcript_product=cactin | location=TGGT1_chrVI:3137734-3142670(-) | protein_length=688 | sequence_SO=chromosome | SO=protein_coding_gene | is_pseudo=false	0	224.246	64	46	360	46	688	79.5	6.16	559.35	46	1.103	0.055	0.053	21.609	1.436	0.474053	2.22045e-16	7.73869e-08	5.44009e-14	0.0930374	0.939797	3.49567e-15	9.55367e-07	5.51502e-13	0.332526	4.18	74.17	84.18	27.73	9.2	1.134	1.103	0.895	0.111	0.021	0.055	0.122	0.027	0.053	12.863	21.609	25.65	1.436	0.504
FALSE	High	Master Protein	TGGT1_235620-t26_1-p1	transcript=TGGT1_235620-t26_1 | gene=TGGT1_235620 | organism=Toxoplasma_gondii_GT1 | gene_product=Deoxyhypusine synthase [Source:UniProtKB/TrEMBL;Acc:S7URL0] | transcript_product=deoxyhypusine synthase | location=TGGT1_chrX:4877700-4879073(+) | protein_length=457 | sequence_SO=chromosome | SO=protein_coding_gene | is_pseudo=false	0	7.31	7	3	6	3	457	50.3	5.76	1.87	3	0.969	0.618	0.761	1.656	1.136	0.938835	0.546886	0.993319	0.507755	0.703589	0.987135	0.91465	0.998556	0.919414	0.923165	23.56	63.91	69.53	16.42	1.55	1.434	0.969	0.836	1.086	0.279	0.618	1.432	0.27	0.761	1.149	1.656	1.839	1.148	0.462
FALSE	High	Master Protein	TGGT1_319340-t26_1-p1	transcript=TGGT1_319340-t26_1 | gene=TGGT1_319340 | organism=Toxoplasma_gondii_GT1 | gene_product=hypothetical protein | transcript_product=hypothetical protein | location=TGGT1_chrIV:962742-964670(+) | protein_length=481 | sequence_SO=chromosome | SO=protein_coding_gene | is_pseudo=false	0	7.075	7	3	6	3	481	52.4	5.87	0	3	1.012	0.794	0.662	1.361	0.706	0.848774	0.875111	0.786001	0.890154	0.0632938	0.985103	0.972597	0.972757	0.986633	0.262662	26.21	7.3	17.2	39.16	4.59	0.833	1.012	1.211	0.794	0.505	0.836	0.662	0.524	0.749	1.001	1.361	2.26	0.656	0.706
FALSE	High	Master Protein	TGGT1_226430-t26_1-p1	transcript=TGGT1_226430-t26_1 | gene=TGGT1_226430 | organism=Toxoplasma_gondii_GT1 | gene_product=Reticulon-like protein [Source:UniProtKB/TrEMBL;Acc:A0A125YHI4] | transcript_product=reticulon protein | location=TGGT1_chrX:1552488-1553078(-) | protein_length=196 | sequence_SO=chromosome | SO=protein_coding_gene | is_pseudo=false	0	10.211	18	3	18	3	196	21.6	7.69	29.32	3	0.821	0.926	0.602	1.53	1.377	0.272925	0.621455	0.642366	0.652365	0.174984	0.800707	0.920342	0.941318	0.957978	0.505431	45.29	11.53	13.36	25.45	48.19	0.821	1.182	0.588	1.004	0.833	0.926	0.602	1.054	0.552	1.267	1.53	2.673	0.929	1.377
FALSE	High	Master Protein	TGGT1_223140-t26_1-p1	transcript=TGGT1_223140-t26_1 | gene=TGGT1_223140 | organism=Toxoplasma_gondii_GT1 | gene_product=tRNA binding domain-containing protein [Source:UniProtKB/TrEMBL;Acc:S7UK62] | transcript_product=tRNA binding domain-containing protein | location=TGGT1_chrII:1451648-1456657(+) | protein_length=472 | sequence_SO=chromosome | SO=protein_coding_gene | is_pseudo=false	0	28.448	28	10	36	10	472	51	8.05	32.42	10	0.971	0.913	0.78	1.127	1.013	0.949975	0.865616	0.953229	0.714002	0.761616	0.988114	0.968316	0.993783	0.96852	0.940377	18.92	46.37	9.06	11.75	8.83	0.565	0.971	1.114	1.329	0.913	0.531	0.831	0.78	0.668	1.037	1.127	2.243	1.074	0.921
FALSE	High	Master Protein	TGGT1_313910-t26_1-p1	transcript=TGGT1_313910-t26_1 | gene=TGGT1_313910 | organism=Toxoplasma_gondii_GT1 | gene_product=RRM_2 domain-containing protein [Source:UniProtKB/TrEMBL;Acc:S7UU31] | transcript_product=RNA recognition motif 2 protein | location=TGGT1_chrXI:3766770-3770119(+) | protein_length=903 | sequence_SO=chromosome | SO=protein_coding_gene | is_pseudo=false	0	67.704	32	20	50	20	903	99.6	7.17	44.56	20	0.961	1.044	1.435	0.974	1.259	0.895333	0.567182	0.196993	0.449474	0.351216	0.985103	0.91465	0.760208	0.915333	0.734371	1.68	2.7	42.69	12.4	35	1.305	0.95	0.961	1.044	1.766	1.025	1.435	1.848	0.873	0.974	0.828	1.062	1.259	1.557
FALSE	Low	Master Protein	TGGT1_261080-t26_1-p1	transcript=TGGT1_261080-t26_1 | gene=TGGT1_261080 | organism=Toxoplasma_gondii_GT1 | gene_product=Kringle domain-containing protein [Source:UniProtKB/TrEMBL;Acc:S7UY52] | transcript_product=kringle domain-containing protein | location=TGGT1_chrVIIb:1823412-1845795(+) | protein_length=3051 | sequence_SO=chromosome | SO=protein_coding_gene | is_pseudo=false	0.073	1.588	0	1	1	1	3051	337.4	5.22	0	1	100	0.743	100	1.361	1.354	1e-17	0.928231	1e-17	0.889668	0.597936	1.73608e-16	0.977578	1.34062e-16	0.986633	0.886291	0	23.54	0	26.74	52.64	100	100	1.083	1.214	0.642	0.743	100	100	0.805	1.116	1.361	100	1.354	0.873
FALSE	Low	Master Protein	TGGT1_211470-t26_1-p1	transcript=TGGT1_211470-t26_1 | gene=TGGT1_211470 | organism=Toxoplasma_gondii_GT1 | gene_product=Fcf2 domain-containing protein [Source:UniProtKB/TrEMBL;Acc:S7VTD5] | transcript_product=Fcf2 pre-rRNA processing protein | location=TGGT1_chrIV:1622888-1624252(+) | protein_length=454 | sequence_SO=chromosome | SO=protein_coding_gene | is_pseudo=false	0.064	1.664	2	1	1	1	454	48.3	9.99	0	1		100	100		100		1e-17	1e-17		1e-17		1.60374e-16	1.34062e-16		1.03758e-16		0	0		0				100	100		100	100					100	100
FALSE	High	Master Protein	TGGT1_233100-t26_1-p1	transcript=TGGT1_233100-t26_1 | gene=TGGT1_233100 | organism=Toxoplasma_gondii_GT1 | gene_product=Prohibitin [Source:UniProtKB/TrEMBL;Acc:A0A125YWW3] | transcript_product=SPFH domain / Band 7 family protein | location=TGGT1_chrVIII:2412652-2416916(-) | protein_length=290 | sequence_SO=chromosome | SO=protein_coding_gene | is_pseudo=false	0	23.736	38	8	45	8	290	32	9.33	38.93	8	0.834	0.647	0.584	1.255	0.739	0.317944	0.450425	0.599635	0.938542	0.0394136	0.846413	0.8874	0.93387	0.993057	0.186914	0.59	9.53	29.93	61.84	6.61	0.834	1.018	0.831	1.139	0.608	0.647	0.827	0.584	0.486	0.732	1.255	2.606	0.707	0.739
FALSE	High	Master Protein	TGGT1_258390-t26_1-p1	transcript=TGGT1_258390-t26_1 | gene=TGGT1_258390 | organism=Toxoplasma_gondii_GT1 | gene_product=J domain-containing protein [Source:UniProtKB/TrEMBL;Acc:S7W7H7] | transcript_product=putative DnaJ protein | location=TGGT1_chrVIIb:3406355-3407941(-) | protein_length=397 | sequence_SO=chromosome | SO=protein_coding_gene | is_pseudo=false	0	9.248	9	3	14	3	397	44.6	6.93	9.82	3	0.974	0.945	0.646	1.385	1.351	0.96484	0.502258	0.748586	0.853761	0.219661	0.990122	0.909352	0.972757	0.984724	0.580339	7.53	3.56	2.53	8.51	10.3	0.706	0.974	1.027	0.968	0.945	0.637	0.646	0.657	0.576	1.305	1.385	2.77	1.445	1.351
FALSE	High	Master Protein	TGGT1_251850-t26_1-p1	transcript=TGGT1_251850-t26_1 | gene=TGGT1_251850 | organism=Toxoplasma_gondii_GT1 | gene_product=Serine/threonine-protein phosphatase [Source:UniProtKB/TrEMBL;Acc:S7V0E9] | transcript_product=serine/threonine protein phosphatase | location=TGGT1_chrXII:5533146-5545757(+) | protein_length=1034 | sequence_SO=chromosome | SO=protein_coding_gene | is_pseudo=false	0	21.856	9	8	16	8	1034	117.3	6.19	11.41	8	0.931	0.88	0.885	1.372	1.065	0.746968	0.724918	0.754129	0.872677	0.959716	0.973495	0.93859	0.972757	0.986633	0.992503	10.7	5.54	16.44	9.88	1.61	0.858	1.004	0.931	1.076	0.88	0.849	0.995	0.885	0.6	1.5	1.372	1.281	1.065	1.146
FALSE	High	Master Protein	TGGT1_253900-t26_1-p1	transcript=TGGT1_253900-t26_1 | gene=TGGT1_253900 | organism=Toxoplasma_gondii_GT1 | gene_product=Delta-aminolevulinic acid dehydratase [Source:UniProtKB/TrEMBL;Acc:S7ULV4] | transcript_product=parasite porphobilinogen synthase PBGS | location=TGGT1_chrIII:1265521-1273167(-) | protein_length=658 | sequence_SO=chromosome | SO=protein_coding_gene | is_pseudo=false	0	29.201	16	10	23	10	658	71.3	5.17	28.59	10	1.073	0.712	0.835	1.309	1.146	0.584682	0.595267	0.844165	0.971984	0.695827	0.956627	0.91465	0.975479	0.995636	0.921624	13.05	4.4	57.6	15.8	2.99	0.957	1.073	1.167	0.692	1.094	0.712	0.601	1.454	0.835	1.309	1.17	1.694	0.793	1.169
FALSE	High	Master Protein	TGGT1_289990-t26_1-p1	transcript=TGGT1_289990-t26_1 | gene=TGGT1_289990 | organism=Toxoplasma_gondii_GT1 | gene_product=hypothetical protein | transcript_product=hypothetical protein | location=TGGT1_chrIX:3375629-3379939(-) | protein_length=753 | sequence_SO=chromosome | SO=protein_coding_gene | is_pseudo=false	0	9.512	5	4	10	4	753	84.2	6.16	3.77	4	1.082	0.583	0.736	1.103	0.997	0.550071	0.463188	0.952794	0.672189	0.823499	0.946874	0.889072	0.993783	0.964904	0.958229	26.79	19.6	53.02	29.43	50.07	1.277	0.753	1.082	0.583	0.515	1.036	0.736	0.495	1.145	1.633	0.884	1.103	0.997	0.671
FALSE	High	Master Protein	TGGT1_310070-t26_1-p1	transcript=TGGT1_310070-t26_1 | gene=TGGT1_310070 | organism=Toxoplasma_gondii_GT1 | gene_product=Methyltranfer_dom domain-containing protein [Source:UniProtKB/TrEMBL;Acc:A0A125YVY5] | transcript_product=putative methyltransferase | location=TGGT1_chrXI:1000351-1003674(-) | protein_length=224 | sequence_SO=chromosome | SO=protein_coding_gene | is_pseudo=false	0	29.547	50	10	31	10	224	25.3	5.68	29.35	10	0.838	0.9	1.128	1.053	1.63	0.330954	0.665556	0.421628	0.58432	0.0371415	0.865415	0.930045	0.904295	0.940356	0.177679	38.23	25.99	28.89	2.18	46.01	0.404	1.129	0.838	0.631	1.092	0.9	1.997	1.128	0.908	1.037	1.053	1.852		1.201
FALSE	High	Master Protein	TGGT1_225020-t26_1-p1	transcript=TGGT1_225020-t26_1 | gene=TGGT1_225020 | organism=Toxoplasma_gondii_GT1 | gene_product=hypothetical protein | transcript_product=hypothetical protein | location=TGGT1_chrX:2489451-2494003(-) | protein_length=1010 | sequence_SO=chromosome | SO=protein_coding_gene | is_pseudo=false	0	105.587	33	32	126	32	1010	114.4	9.04	122.51	32	1.023	1.028	1.023	0.957	1.079	0.801188	0.598777	0.543911	0.422019	0.956206	0.985103	0.91465	0.926406	0.912488	0.990916	15.2	10.66	4.46	20.63	0.53	1.235	0.918	1.023	0.79	1.102	1.028	0.991	1.023	1.054	1.364	0.84	0.957	1.079	1.021
FALSE	Medium	Master Protein	TGGT1_238190-t26_1-p1	transcript=TGGT1_238190-t26_1 | gene=TGGT1_238190 | organism=Toxoplasma_gondii_GT1 | gene_product=RPOLD domain-containing protein [Source:UniProtKB/TrEMBL;Acc:S7UQW7] | transcript_product=DNA-directed RNA polymerase II RPB3 | location=TGGT1_chrVI:112159-117682(+) | protein_length=484 | sequence_SO=chromosome | SO=protein_coding_gene | is_pseudo=false	0.014	2.476	2	1	3	1	484	51.7	5.66	0	1	1.086	0.642	0.697	2.241	1.421	0.534314	0.64266	0.867447	0.14158	0.355729	0.942037	0.925948	0.981008	0.621536	0.736407	2.81	0.91	31.12	1.9	118.13	1.366	1.065	1.086	0.646	0.01	0.642	0.883	0.01	0.697	3.95	2.241	2.212	2.552	0.01
FALSE	High	Master Protein	TGGT1_208830-t26_1-p1	transcript=TGGT1_208830-t26_1 | gene=TGGT1_208830 | organism=Toxoplasma_gondii_GT1 | gene_product=hypothetical protein | transcript_product=hypothetical protein | location=TGGT1_chrIb:904648-906165(-) | protein_length=505 | sequence_SO=chromosome | SO=protein_coding_gene | is_pseudo=false	0	6.461	6	3	3	3	505	54.9	9.95	2.02	3	100	12.672	100	100	100	1e-17	5.28955e-12	1e-17	1e-17	1e-17	1.73608e-16	7.89292e-11	1.34062e-16	1.03865e-16	1.03758e-16	0	575.59	0	0	0		100			1.606	100		100	100		100			100
FALSE	High	Master Protein	TGGT1_211030-t26_1-p1	transcript=TGGT1_211030-t26_1 | gene=TGGT1_211030 | organism=Toxoplasma_gondii_GT1 | gene_product=hypothetical protein | transcript_product=hypothetical protein | location=TGGT1_chrIV:1889471-1891938(-) | protein_length=191 | sequence_SO=chromosome | SO=protein_coding_gene | is_pseudo=false	0	12.186	28	4	20	4	191	22.2	5.82	19.23	4	0.804	0.666	0.656	1.567	2.005	0.222289	0.433312	0.77093	0.60694	0.000351142	0.742727	0.876844	0.972757	0.944439	0.00241428	16.96	10.58	40.3	26.65	7.94	0.722	0.804	1.042	0.666	2.213	0.621	0.516	1.661	0.656	1.219	1.567	1.848	0.961	2.112
FALSE	High	Master Protein	TGGT1_205510-t26_1-p1	transcript=TGGT1_205510-t26_1 | gene=TGGT1_205510 | organism=Toxoplasma_gondii_GT1 | gene_product=Nop domain-containing protein [Source:UniProtKB/TrEMBL;Acc:S7UUJ5] | transcript_product=putative nucleolar protein 5 | location=TGGT1_chrVIIa:1272709-1276843(-) | protein_length=490 | sequence_SO=chromosome | SO=protein_coding_gene | is_pseudo=false	0	39.225	34	12	34	12	490	54.3	9.04	35.71	12	0.977	0.844	0.72	1.287	1.093	0.977995	0.944938	0.918145	0.991519	0.898962	0.994532	0.98475	0.985943	0.995636	0.9753	17.73	24.56	10.44	25.47	6.64	0.867	0.977	1.11	1.011	0.844	0.601	0.912	0.72	0.672	1.066	1.287	2.41	1.044	1.093
FALSE	High	Master Protein	TGGT1_320600-t26_1-p1	transcript=TGGT1_320600-t26_1 | gene=TGGT1_320600 | organism=Toxoplasma_gondii_GT1 | gene_product=CSD_1 domain-containing protein [Source:UniProtKB/TrEMBL;Acc:S7VSL4] | transcript_product=cold-shock DNA-binding domain-containing protein | location=TGGT1_chrIV:154209-155894(+) | protein_length=209 | sequence_SO=chromosome | SO=protein_coding_gene | is_pseudo=false	0	17.319	25	4	29	4	209	23.1	9.82	48.83	4	0.712	0.528	0.386	1.757	1.095	0.0486748	0.210514	0.173131	0.412337	0.879498	0.317707	0.697379	0.722853	0.905347	0.971843	18.91	26.92	41.11	43.67	125.51	0.712	0.985	0.631	0.528	0.096	0.645	0.386	0.095	0.534	1.239	1.757	100	1.095	0.168
FALSE	Medium	Master Protein	TGGT1_276970-t26_1-p1	transcript=TGGT1_276970-t26_1 | gene=TGGT1_276970 | organism=Toxoplasma_gondii_GT1 | gene_product=hypothetical protein | transcript_product=hypothetical protein | location=TGGT1_chrXII:6725190-6729392(+) | protein_length=716 | sequence_SO=chromosome | SO=protein_coding_gene | is_pseudo=false	0.012	2.594	1	1	1	1	716	78	6.27	0	1	100	100	100	100	100	1e-17	1e-17	1e-17	1e-17	1e-17	1.73608e-16	1.60374e-16	1.34062e-16	1.03865e-16	1.03758e-16	0	0	0	0	0	100			0.01	100	100		100	100	100				100
FALSE	High	Master Protein	TGGT1_253880-t26_1-p1	transcript=TGGT1_253880-t26_1 | gene=TGGT1_253880 | organism=Toxoplasma_gondii_GT1 | gene_product=Elongation of fatty acids protein [Source:UniProtKB/TrEMBL;Acc:S7VVE9] | transcript_product=GNS1/SUR4 family protein | location=TGGT1_chrIII:1247523-1249706(+) | protein_length=727 | sequence_SO=chromosome | SO=protein_coding_gene | is_pseudo=false	0.001	4.965	3	1	1	1	727	78.1	8.78	2.78	1	100	1	100	100	100	1e-17	0.431139	1e-17	1e-17	1e-17	1.73608e-16	0.875057	1.34062e-16	1.03865e-16	1.03758e-16	0	7412.26	0	0	0			100		100	0.01		100				100		100
FALSE	High	Master Protein	TGGT1_294040-t26_1-p1	transcript=TGGT1_294040-t26_1 | gene=TGGT1_294040 | organism=Toxoplasma_gondii_GT1 | gene_product=Putative KDEL endoplasmic reticulum proteinretention receptor 2 (KDELR2) [Source:UniProtKB/TrEMBL;Acc:S7UHH8] | transcript_product=putative KDEL endoplasmic reticulum proteinretention receptor 2 (KDELR2) | location=TGGT1_chrIa:643316-647084(+) | protein_length=400 | sequence_SO=chromosome | SO=protei…	0	8.698	20	3	5	3	400	44.9	6.6	0	3	1.095	0.767	0.864	1.063	0.824	0.501128	0.987534	0.79092	0.602245	0.311145	0.942037	0.997367	0.972757	0.942063	0.689108	16.34	4.08	18.2	1.52	2.61	1.095	0.974	1.549	0.789	0.135	0.767	0.864	0.132	0.985	1.063	1.005	1.074	0.838	0.136
FALSE	High	Master Protein	TGGT1_230940-t26_1-p1	transcript=TGGT1_230940-t26_1 | gene=TGGT1_230940 | organism=Toxoplasma_gondii_GT1 | gene_product=hypothetical protein | transcript_product=hypothetical protein | location=TGGT1_chrVIII:1112065-1119747(+) | protein_length=1523 | sequence_SO=chromosome | SO=protein_coding_gene | is_pseudo=false	0	123.043	33	32	163	32	1523	155.1	9.44	190.42	32	1.033	1.299	1.528	0.841	1.094	0.753148	0.218066	0.156628	0.251274	0.896429	0.974118	0.708715	0.689164	0.806249	0.9753	9.05	11.78	0.81	2.6	0.23	1.124	1.033	0.97	1.299	1.402	0.77	1.528	1.536	0.734	0.841	0.826	1.159	1.095	1.094
FALSE	High	Master Protein	TGGT1_236040-t26_1-p1	transcript=TGGT1_236040-t26_1 | gene=TGGT1_236040 | organism=Toxoplasma_gondii_GT1 | gene_product=Fructose-bisphosphate aldolase [Source:UniProtKB/TrEMBL;Acc:A0A125YGE5] | transcript_product=fructose-1,6-bisphosphate aldolase | location=TGGT1_chrX:5139351-5141389(+) | protein_length=433 | sequence_SO=chromosome | SO=protein_coding_gene | is_pseudo=false	0	55.278	33	13	133	13	433	46.9	8.82	215.03	13	1.034	0.604	0.59	1.966	1.2	0.748156	0.281908	0.612967	0.262786	0.509817	0.973495	0.777197	0.93387	0.826287	0.850688	3.97	51.35	4.25	56.92	110.59	0.67	1.062	1.034	0.925	0.157	0.604	0.59	0.159	0.607	1.211	1.966	3.943	1.2	0.305
FALSE	High	Master Protein	TGGT1_253650-t26_1-p1	transcript=TGGT1_253650-t26_1 | gene=TGGT1_253650 | organism=Toxoplasma_gondii_GT1 | gene_product=DnaJ C terminal region domain-containing protein [Source:UniProtKB/TrEMBL;Acc:S7UMU2] | transcript_product=DnaJ C terminal region domain-containing protein | location=TGGT1_chrIII:1063337-1067055(-) | protein_length=712 | sequence_SO=chromosome | SO=protein_coding_gene | is_pseudo=false	0	27.147	19	10	29	10	712	76.3	7.03	13.28	10	1.058	0.573	0.686	1.498	0.915	0.643604	0.389969	0.842368	0.69358	0.383663	0.965361	0.851712	0.975299	0.9684	0.766982	2.89	1.01	15.75	2.49	0.39	1.058	1.079	1.035	0.573	1.01	0.569	0.62	1.048	0.686	1.523	1.405	1.498	0.913	1.076
FALSE	High	Master Protein	TGGT1_209030-t26_1-p1	transcript=TGGT1_209030-t26_1 | gene=TGGT1_209030 | organism=Toxoplasma_gondii_GT1 | gene_product=Actin ACT1 [Source:UniProtKB/TrEMBL;Acc:A0A125YH17] | transcript_product=actin ACT1 | location=TGGT1_chrIb:1014618-1016180(+) | protein_length=376 | sequence_SO=chromosome | SO=protein_coding_gene | is_pseudo=false	0	114.672	65	21	326	20	376	41.9	5.16	497.28	21	0.793	0.685	0.664	1.381	1.058	0.190573	0.484708	0.791097	0.858524	0.955734	0.685876	0.909352	0.972757	0.984724	0.990916	6.17	29.7	8.39	21.18	41.93	0.761	0.966	0.793	0.869	0.571	0.685	0.704	0.518	0.664	1.184	1.381	2.884	1.058	0.759
FALSE	High	Master Protein	TGGT1_321400-t26_1-p1	transcript=TGGT1_321400-t26_1 | gene=TGGT1_321400 | organism=Toxoplasma_gondii_GT1 | gene_product=Microsomal signal peptidase (Spc12) domain-containing protein [Source:UniProtKB/TrEMBL;Acc:A0A125YNM0] | transcript_product=microsomal signal peptidase (spc12) domain-containing protein | location=TGGT1_chrIb:1847078-1847464(+) | protein_length=128 | sequence_SO=chromosome | SO=protein_coding_gene | …	0	5.9	15	2	7	2	128	14.2	8.6	5.16	2	1.114	0.832	0.926	1.124	0.901	0.437906	0.756711	0.684532	0.708848	0.489417	0.923296	0.943561	0.945617	0.96852	0.847134	2.83	8.86	16.38	25.11	3.19	1.135	1.063	1.114	0.965	0.785	0.832	1.095	0.834	0.926	0.933	1.124	2.193	0.901	0.882
FALSE	Medium	Master Protein	TGGT1_214470-t26_1-p1	transcript=TGGT1_214470-t26_1 | gene=TGGT1_214470 | organism=Toxoplasma_gondii_GT1 | gene_product=ULP_PROTEASE domain-containing protein [Source:UniProtKB/TrEMBL;Acc:S7UQB5] | transcript_product=Ulp1 protease family, C-terminal catalytic domain-containing protein | location=TGGT1_chrX:6187338-6194769(-) | protein_length=771 | sequence_SO=chromosome | SO=protein_coding_gene | is_pseudo=false	0.017	2.362	2	1	1	1	771	85.2	7.71	0	1
FALSE	High	Master Protein	TGGT1_267060-t26_1-p1	transcript=TGGT1_267060-t26_1 | gene=TGGT1_267060 | organism=Toxoplasma_gondii_GT1 | gene_product=Ribosomal_L14e domain-containing protein [Source:UniProtKB/TrEMBL;Acc:S7VPP6] | transcript_product=ribosomal protein RPL14 | location=TGGT1_chrIX:634719-636622(+) | protein_length=157 | sequence_SO=chromosome | SO=protein_coding_gene | is_pseudo=false	0	14.139	30	5	35	5	157	17.9	10.77	53.28	5	0.695	0.933	0.658	1.151	1.088	0.0339003	0.779319	0.775989	0.7564	0.917949	0.243966	0.943561	0.972757	0.971965	0.979145	35.7	51.65	4.3	9.98	67.84	0.695	0.975	0.56	0.933	0.512	1.432	0.639	0.658	0.802	1.073	1.151	1.878	1.088	0.59
FALSE	High	Master Protein	TGGT1_207440-t26_1-p1	transcript=TGGT1_207440-t26_1 | gene=TGGT1_207440 | organism=Toxoplasma_gondii_GT1 | gene_product=S4 RNA-binding domain-containing protein [Source:UniProtKB/TrEMBL;Acc:A0A125YYJ0] | transcript_product=ribosomal protein RPS4 | location=TGGT1_chrIb:77395-80548(-) | protein_length=312 | sequence_SO=chromosome | SO=protein_coding_gene | is_pseudo=false	0	59.761	41	14	146	14	312	35.5	10.18	189.13	14	0.79	1.108	1.349	0.928	1.113	0.182543	0.450859	0.244127	0.375922	0.818375	0.668002	0.8874	0.830689	0.891088	0.958229	1.59	2.61	12.94	0.31	21.85	1.323	0.79	0.781	1.089	1.108	1.715	1.466	0.922	1.349	0.929	0.928	0.848	0.949	1.113
FALSE	High	Master Protein	TGGT1_203760-t26_1-p1	transcript=TGGT1_203760-t26_1 | gene=TGGT1_203760 | organism=Toxoplasma_gondii_GT1 | gene_product=hypothetical protein | transcript_product=hypothetical protein | location=TGGT1_chrVIIa:2153059-2162964(-) | protein_length=1396 | sequence_SO=chromosome | SO=protein_coding_gene | is_pseudo=false	0.008	2.889	1	1	1	1	1396	151	5.73	2.63	1	100	1	100	100	100	1e-17	0.546833	1e-17	1e-17	1e-17	1.73608e-16	0.91465	1.34062e-16	1.03865e-16	1.03758e-16	0	7412.26	0	0	0			100		100	0.01		100				100		100
FALSE	Medium	Master Protein	TGGT1_243760-t26_1-p1	transcript=TGGT1_243760-t26_1 | gene=TGGT1_243760 | organism=Toxoplasma_gondii_GT1 | gene_product=TLC domain-containing protein [Source:UniProtKB/TrEMBL;Acc:S7UFR6] | transcript_product=hypothetical protein | location=TGGT1_chrVI:2759731-2762020(-) | protein_length=435 | sequence_SO=chromosome | SO=protein_coding_gene | is_pseudo=false	0.032	2.014	2	1	1	1	435	49.2	9.11	1.83	1	1.34	0.89	1	100	100	0.0558545	0.705098	0.574911	1e-17	1e-17	0.338139	0.933509	0.926406	1.03865e-16	1.03758e-16	10.19	27.7	32.02	0	0	0.913	1.432	1.34	1.095	0.89	0.572	1	1.275	0.766	100	100	2.461	100	100
FALSE	High	Master Protein	TGGT1_209200-t26_1-p1	transcript=TGGT1_209200-t26_1 | gene=TGGT1_209200 | organism=Toxoplasma_gondii_GT1 | gene_product=hypothetical protein | transcript_product=hypothetical protein | location=TGGT1_chrIb:1128185-1136295(+) | protein_length=753 | sequence_SO=chromosome | SO=protein_coding_gene | is_pseudo=false	0	33.682	20	11	24	11	753	82.1	7.05	32.77	11	1.166	1.19	1.625	1.04	1.703	0.290844	0.256433	0.12324	0.562303	0.0107423	0.815003	0.753491	0.605957	0.940113	0.0601006	19.16	45.14	26.54	18.19	3.65	1.485	1.015	1.166	0.828	1.561	1.19	1.95	1.625	1.334	1.976	0.913	1.04	1.745	1.703
FALSE	High	Master Protein	TGGT1_286720-t26_1-p1	transcript=TGGT1_286720-t26_1 | gene=TGGT1_286720 | organism=Toxoplasma_gondii_GT1 | gene_product=SHSP domain-containing protein [Source:UniProtKB/TrEMBL;Acc:A0A125YWV5] | transcript_product=heat shock protein HSP28 | location=TGGT1_chrV:1565219-1566049(+) | protein_length=276 | sequence_SO=chromosome | SO=protein_coding_gene | is_pseudo=false	0	16.052	26	6	10	6	276	31	6.23	3.93	6	0.822	0.897	0.71	1.19	1.337	0.277032	0.578887	0.895991	0.826143	0.235619	0.808926	0.91465	0.983699	0.980849	0.599375	20.37	22.78	10.78	0.55	0.92	0.723	1.181	0.822	1.059	0.756	0.897	0.662	0.901	0.71	1.045	1.195	1.19	1.337	0.925
FALSE	High	Master Protein	TGGT1_225550-t26_1-p1	transcript=TGGT1_225550-t26_1 | gene=TGGT1_225550 | organism=Toxoplasma_gondii_GT1 | gene_product=Phosphatidylserine decarboxylase proenzyme 1, mitochondrial [Source:UniProtKB/Swiss-Prot;Acc:Q1PCQ8] | transcript_product=phosphatidylserine decarboxylase | location=TGGT1_chrX:2075581-2079309(+) | protein_length=427 | sequence_SO=chromosome | SO=protein_coding_gene | is_pseudo=false	0	11.913	14	5	11	5	427	48.4	10.11	3.8	5	0.948	0.629	0.545	1.53	0.812	0.830059	0.606062	0.507251	0.652421	0.242116	0.985103	0.91465	0.926268	0.957978	0.611059	38.2	3.51	26.82	14.98	23.2	0.948	0.626	1.277	0.436	0.645	0.629	0.44	0.666	0.545	1.684	1.108	1.53	0.673	0.812
FALSE	High	Master Protein	TGGT1_213910-t26_1-p1	transcript=TGGT1_213910-t26_1 | gene=TGGT1_213910 | organism=Toxoplasma_gondii_GT1 | gene_product=hypothetical protein | transcript_product=hypothetical protein | location=TGGT1_chrV:1293579-1296140(+) | protein_length=403 | sequence_SO=chromosome | SO=protein_coding_gene | is_pseudo=false	0	10.911	12	4	9	4	403	43.6	9.64	7.78	4	1.048	1.045	1.041	1.104	0.95	0.687106	0.336468	0.520338	0.674993	0.629194	0.969375	0.823825	0.926406	0.964904	0.897666	11.73	9.55	3.24	11.37	16.51	0.965	1.238	1.048	1.112	0.841	1.045	1.064	1.041	0.989	1.104	0.996	1.189	0.95	0.854
FALSE	High	Master Protein	TGGT1_316250-t26_1-p1	transcript=TGGT1_316250-t26_1 | gene=TGGT1_316250 | organism=Toxoplasma_gondii_GT1 | gene_product=hypothetical protein | transcript_product=hypothetical protein | location=TGGT1_chrXI:5154312-5155496(-) | protein_length=394 | sequence_SO=chromosome | SO=protein_coding_gene | is_pseudo=false	0	7.06	9	3	8	3	394	44.8	4.93	0	3	0.972	0.572	0.611	1.799	1.025	0.953202	0.371295	0.663435	0.376695	0.914302	0.989028	0.833119	0.941345	0.891088	0.978711	4.51	3.07	2.65	29.81	12.26	0.693	0.972	1.003	0.572	0.56	0.609	0.396	0.622	0.611	1.438	1.799	2.471	0.94	1.025
FALSE	High	Master Protein	TGGT1_222380-t26_1-p1	transcript=TGGT1_222380-t26_1 | gene=TGGT1_222380 | organism=Toxoplasma_gondii_GT1 | gene_product=Importin N-terminal domain-containing protein [Source:UniProtKB/TrEMBL;Acc:A0A125YMQ8] | transcript_product=importin-beta N-terminal domain-containing protein | location=TGGT1_chrII:1069107-1078180(+) | protein_length=1147 | sequence_SO=chromosome | SO=protein_coding_gene | is_pseudo=false	0	29.393	10	11	31	11	1147	129.4	6.42	11.8	11	1.013	0.684	0.759	1.48	0.984	0.846646	0.580331	0.997702	0.717322	0.664156	0.985103	0.91465	0.999983	0.96852	0.903843	16.69	38.62	13.22	31.28	37.34	0.899	1.013	1.147	0.924	0.508	0.684	0.833	0.555	0.759	1.068	1.48	1.792	0.984	0.694
FALSE	Low	Master Protein	TGGT1_304770-t26_1-p1	transcript=TGGT1_304770-t26_1 | gene=TGGT1_304770 | organism=Toxoplasma_gondii_GT1 | gene_product=UBIQUITIN_CONJUGAT_2 domain-containing protein [Source:UniProtKB/TrEMBL;Acc:A0A125YYP0] | transcript_product=ubiquitin-conjugating enzyme subfamily protein | location=TGGT1_chrVIIa:677672-680044(-) | protein_length=155 | sequence_SO=chromosome | SO=protein_coding_gene | is_pseudo=false	0.059	1.694	7	1	1	1	155	17.6	5.9	0	1	0.575	0.928	0.356	100	100	0.0010247	0.596156	0.12697	1e-17	1e-17	0.0120671	0.91465	0.612948	1.03865e-16	1.03758e-16	74.18	34.31	72.31	0	0	0.383	1.333	0.575	0.928	0.01	1.208	0.356	0.01	0.694	100	2.049	100	100	0.01
FALSE	High	Master Protein	TGGT1_314265-t26_1-p1	transcript=TGGT1_314265-t26_1 | gene=TGGT1_314265 | organism=Toxoplasma_gondii_GT1 | gene_product=hypothetical protein | transcript_product=hypothetical protein | location=TGGT1_chrXI:3932511-3937726(+) | protein_length=864 | sequence_SO=chromosome | SO=protein_coding_gene | is_pseudo=false	0	66.11	31	20	52	20	864	91.7	7.91	35.72	20	1.01	1.016	1.182	1.021	1.184	0.861336	0.623294	0.36925	0.529683	0.561679	0.985103	0.920342	0.89526	0.934143	0.864744	20.1	23.3	1.61	14.19	8.26	1.344	0.873	1.01	0.856	1.25	1.016	1.182	1.332	1.169	1.595	0.923	1.021	1.184	1.292
FALSE	High	Master Protein	TGGT1_293590-t26_1-p1	transcript=TGGT1_293590-t26_1 | gene=TGGT1_293590 | organism=Toxoplasma_gondii_GT1 | gene_product=PKS_KS domain-containing protein [Source:UniProtKB/TrEMBL;Acc:A0A125YFZ7] | transcript_product=putative 3-oxoacyl-acyl-carrier protein synthase I/II | location=TGGT1_chrIa:424590-433347(+) | protein_length=551 | sequence_SO=chromosome | SO=protein_coding_gene | is_pseudo=false	0	31.388	27	12	35	12	551	58.4	8.48	16.95	12	0.984	0.923	0.968	1.082	1.031	0.987106	0.840168	0.620429	0.635604	0.838759	0.997771	0.957445	0.93387	0.950029	0.959846	0.99	0.14	1.91	12.09	2.47	1.138	0.984	0.977	0.922	0.923	0.945	1.29	0.956	0.968	1.082	0.994	1.255	1.031	1.014
FALSE	High	Master Protein	TGGT1_218220-t26_1-p1	transcript=TGGT1_218220-t26_1 | gene=TGGT1_218220 | organism=Toxoplasma_gondii_GT1 | gene_product=Protein kinase domain-containing protein [Source:UniProtKB/TrEMBL;Acc:A0A125YRL6] | transcript_product=putative cell-cycle-associated protein kinase CDK | location=TGGT1_chrXII:1607473-1610937(+) | protein_length=300 | sequence_SO=chromosome | SO=protein_coding_gene | is_pseudo=false	0	6.166	10	2	5	2	300	34.3	7.09	3.4	2	1.049	0.796	0.952	1.503	1.216	0.68128	0.926139	0.644551	0.686881	0.522597	0.969375	0.977578	0.941318	0.9684	0.858683	20.76	47.46	5.71	2.55	43.78	0.846	1.049	1.196	1.17	0.553	0.796	0.99	0.58	0.952	1.346	1.503	1.529	1.576	0.831
FALSE	High	Master Protein	TGGT1_240860-t26_1-p1	transcript=TGGT1_240860-t26_1 | gene=TGGT1_240860 | organism=Toxoplasma_gondii_GT1 | gene_product=PlsC domain-containing protein [Source:UniProtKB/TrEMBL;Acc:A0A125YWP8] | transcript_product=acyltransferase domain-containing protein | location=TGGT1_chrVI:1452612-1456058(-) | protein_length=281 | sequence_SO=chromosome | SO=protein_coding_gene | is_pseudo=false	0	19.647	34	7	26	7	281	31.8	8.85	20.87	7	1.002	0.824	0.853	1.23	1.161	0.898189	0.887772	0.809577	0.895453	0.637023	0.985103	0.974587	0.973927	0.986633	0.897666	9.72	2.42	17.19	15.22	0.03	0.936	1.074	1.002	0.824	1.156	0.811	0.853	1.287	0.765	1.104	1.23	1.524	1.018	1.161
FALSE	High	Master Protein	TGGT1_263980-t26_1-p1	transcript=TGGT1_263980-t26_1 | gene=TGGT1_263980 | organism=Toxoplasma_gondii_GT1 | gene_product=PPR_long domain-containing protein [Source:UniProtKB/TrEMBL;Acc:S7W6F2] | transcript_product=pentatricopeptide repeat domain-containing protein | location=TGGT1_chrVIIb:232148-245853(+) | protein_length=2691 | sequence_SO=chromosome | SO=protein_coding_gene | is_pseudo=false	0	9.91	1	4	5	4	2691	291.9	8.16	3.36	4	1.16	0.856	0.928	1.498	1.293	0.305153	0.734044	0.681812	0.693016	0.367812	0.841727	0.941881	0.945617	0.9684	0.750048	28.86	22.38	22.12	8.08	18.07	1.496	0.934	1.16	0.856	1.008	0.575	1.091	0.928	0.667	1.58	1.41	1.498	1.293	1.45
FALSE	High	Master Protein	TGGT1_287230-t26_1-p1	transcript=TGGT1_287230-t26_1 | gene=TGGT1_287230 | organism=Toxoplasma_gondii_GT1 | gene_product=Sulfate_transp domain-containing protein [Source:UniProtKB/TrEMBL;Acc:S7UP84] | transcript_product=inorganic anion transporter, sulfate permease (SulP) family protein | location=TGGT1_chrV:1366467-1368494(-) | protein_length=675 | sequence_SO=chromosome | SO=protein_coding_gene | is_pseudo=false	0.002	4.073	2	1	1	1	675	72	6.99	2.13	1	100	1.996	100	100	100	1e-17	0.024451	1e-17	1e-17	1e-17	1.73608e-16	0.171959	1.34062e-16	1.03865e-16	1.03758e-16	0	48.98	0	0	0	100	100	1.445	2.655	1.996	1.107	100	100	1.599	100	0.963	100	100	1.921
FALSE	Medium	Master Protein	TGGT1_236840-t26_1-p1	transcript=TGGT1_236840-t26_1 | gene=TGGT1_236840 | organism=Toxoplasma_gondii_GT1 | gene_product=C3H1-type domain-containing protein [Source:UniProtKB/TrEMBL;Acc:A0A125YGX1] | transcript_product=putative zinc finger (C-x8-C-x5-C-x3-H)-2 | location=TGGT1_chrX:5420639-5424914(+) | protein_length=372 | sequence_SO=chromosome | SO=protein_coding_gene | is_pseudo=false	0.033	1.994	2	1	1	1	372	42	5.08	0	1	0.933	0.728	0.851	1.743	0.803	0.756652	0.891659	0.814709	0.424277	0.275993	0.976401	0.974587	0.973927	0.914823	0.647259	28.56	84.91	53.63	54.44	147.07	1.169	0.933	0.782	0.728	0.151	1.703	0.851	0.141	1.333	1.103	1.743	100	0.803	0.264
FALSE	Low	Master Protein	TGGT1_254410-t26_1-p1	transcript=TGGT1_254410-t26_1 | gene=TGGT1_254410 | organism=Toxoplasma_gondii_GT1 | gene_product=Protein phosphatase [Source:UniProtKB/TrEMBL;Acc:S7W1Z8] | transcript_product=putative protein phosphatase 2C | location=TGGT1_chrIII:1695545-1701599(-) | protein_length=626 | sequence_SO=chromosome | SO=protein_coding_gene | is_pseudo=false	0.059	1.695	1	1	1	1	626	67.4	8.51	0	1	0.813	0.01	0.01	11.054	0.01	0.247838	1e-17	1e-17	9.97503e-09	1e-17	0.774337	1.60374e-16	1.34062e-16	8.88828e-08	1.03758e-16	32.59	0	0	662.44	0		0.654	1.011		0.01	0.01		0.01	0.01		1.222	100		0.01
FALSE	High	Master Protein	TGGT1_224460-t26_1-p1	transcript=TGGT1_224460-t26_1 | gene=TGGT1_224460 | organism=Toxoplasma_gondii_GT1 | gene_product=Putative aminopeptidase n [Source:UniProtKB/TrEMBL;Acc:S7UWT6] | transcript_product=putative aminopeptidase n | location=TGGT1_chrX:2956872-2964821(+) | protein_length=970 | sequence_SO=chromosome | SO=protein_coding_gene | is_pseudo=false	0	11.114	4	4	14	4	970	108.7	5.92	3.77	4	0.914	0.712	0.655	1.275	0.859	0.659955	0.561428	0.768327	0.971726	0.213366	0.968393	0.91465	0.972757	0.995636	0.569863	1.1	10.3	15.12	18.03	25.35	0.721	0.92	0.914	0.655	0.712	0.765	0.538	0.655	0.729	1.063	1.275	1.43	0.71	0.859
FALSE	High	Master Protein	TGGT1_202500-t26_1-p1	transcript=TGGT1_202500-t26_1 | gene=TGGT1_202500 | organism=Toxoplasma_gondii_GT1 | gene_product=GAPM1a [Source:UniProtKB/TrEMBL;Acc:A0A125YZ75] | transcript_product=GAPM1a | location=TGGT1_chrVIIa:3172046-3174108(-) | protein_length=305 | sequence_SO=chromosome | SO=protein_coding_gene | is_pseudo=false	0	30.766	29	5	53	4	305	33.5	5.1	61.88	5	1.083	0.761	0.875	0.892	0.784	0.546834	0.70486	0.770101	0.322079	0.0786674	0.946422	0.933509	0.972757	0.866168	0.304875	5.09	27.06	21.98	7.95	6.92	0.768	1.083	1.12	0.761	1.015	0.644	0.762	1.144	0.875	0.892	0.846	1.111	0.784	0.923
FALSE	High	Master Protein	TGGT1_282055-t26_1-p1	transcript=TGGT1_282055-t26_1 | gene=TGGT1_282055 | organism=Toxoplasma_gondii_GT1 | gene_product=PPM-type phosphatase domain-containing protein [Source:UniProtKB/TrEMBL;Acc:S7UW79] | transcript_product=protein phosphatase PP2C-hn | location=TGGT1_chrVIIa:4262456-4267234(-) | protein_length=478 | sequence_SO=chromosome | SO=protein_coding_gene | is_pseudo=false	0	19.21	17	7	18	7	478	51.9	8.68	1.87	7	0.887	0.988	0.974	1.346	1.23	0.533887	0.562327	0.611426	0.913753	0.43036	0.942037	0.91465	0.93387	0.987717	0.80811	36.07	41.49	11.12	24.25	22.4	0.713	0.887	1.211	0.645	1.372	0.988	0.543	1.053	0.974	1.346	0.932	1.566	1.023	1.23
FALSE	High	Master Protein	TGGT1_239500-t26_1-p1	transcript=TGGT1_239500-t26_1 | gene=TGGT1_239500 | organism=Toxoplasma_gondii_GT1 | gene_product=Proteasome subunit alpha type [Source:UniProtKB/TrEMBL;Acc:A0A125YQC3] | transcript_product=putative proteasome subunit alpha type | location=TGGT1_chrVI:713977-716908(+) | protein_length=252 | sequence_SO=chromosome | SO=protein_coding_gene | is_pseudo=false	0	7.27	15	3	9	3	252	27.9	5.38	0	3	0.846	0.742	0.613	1.669	1.304	0.363093	0.988068	0.669161	0.494528	0.312418	0.885121	0.997367	0.944149	0.915333	0.691033	23.59	23.86	2.37	17.33	119.55	0.693	1.006	0.846	0.884	0.151	0.742	0.613	0.152	0.623	1.474	1.669	100	1.304	0.252
FALSE	Medium	Master Protein	TGGT1_224580-t26_1-p1	transcript=TGGT1_224580-t26_1 | gene=TGGT1_224580 | organism=Toxoplasma_gondii_GT1 | gene_product=RNA recognition motif-containing protein [Source:UniProtKB/TrEMBL;Acc:S7UWB1] | transcript_product=RNA recognition motif-containing protein | location=TGGT1_chrX:2870877-2875786(-) | protein_length=539 | sequence_SO=chromosome | SO=protein_coding_gene | is_pseudo=false	0.038	1.89	2	1	1	1	539	54.4	9.48	0	1	0.741	0.835	0.889	1.066	0.898	0.0851919	0.842153	0.747124	0.606825	0.495674	0.442787	0.957677	0.972757	0.944439	0.847237	1.36	45.96	16.55	44.94	1.48	0.735	1.199	0.741	1.21	0.835	0.444	0.889	1	0.329	0.743	1.066	2.495	0.898	0.889
FALSE	High	Master Protein	TGGT1_290720-t26_1-p1	transcript=TGGT1_290720-t26_1 | gene=TGGT1_290720 | organism=Toxoplasma_gondii_GT1 | gene_product=Putative vacuolar proton translocating ATPase subunit [Source:UniProtKB/TrEMBL;Acc:S7UQ16] | transcript_product=putative vacuolar proton translocating ATPase subunit | location=TGGT1_chrIX:3665604-3675342(+) | protein_length=1066 | sequence_SO=chromosome | SO=protein_coding_gene | is_pseudo=false	0	12.815	5	4	7	4	1066	118.3	6.21	7.44	4	0.965	0.736	0.818	1.417	1.043	0.917255	0.9135	0.876288	0.805938	0.997002	0.985103	0.974587	0.981008	0.980472	0.999707	1.25	33.37	14.85	50.63	30.72	0.965	1.334	0.957	0.736	0.496	0.95	0.818	0.627	0.909	1.417	0.933	2.186	1.043	0.668
FALSE	High	Master Protein	TGGT1_227030-t26_1-p1	transcript=TGGT1_227030-t26_1 | gene=TGGT1_227030 | organism=Toxoplasma_gondii_GT1 | gene_product=hypothetical protein | transcript_product=hypothetical protein | location=TGGT1_chrX:1036138-1037712(+) | protein_length=170 | sequence_SO=chromosome | SO=protein_coding_gene | is_pseudo=false	0	16.184	44	6	24	6	170	18.7	8.07	16.43	6	1.015	0.846	0.953	0.83	0.775	0.834912	0.950341	0.642242	0.237519	0.068165	0.985103	0.986561	0.941318	0.794702	0.276537	13.1	1.46	9.31	8.76	43.78	0.926	1.015	1.105	0.846	0.622	0.854	0.953	0.646	1.017	0.83	0.784	1.205	0.599	0.775
FALSE	High	Master Protein	TGGT1_230340-t26_1-p1	transcript=TGGT1_230340-t26_1 | gene=TGGT1_230340 | organism=Toxoplasma_gondii_GT1 | gene_product=hypothetical protein | transcript_product=hypothetical protein | location=TGGT1_chrVIII:711206-715922(+) | protein_length=949 | sequence_SO=chromosome | SO=protein_coding_gene | is_pseudo=false	0	274.62	54	53	493	53	949	102.3	7.23	841.77	53	1.115	1.161	1.299	0.87	1.253	0.435097	0.3718	0.276042	0.290811	0.366792	0.922411	0.833119	0.844363	0.847824	0.750048	6.98	26.16	3.01	5.25	13.61	1.26	1.062	1.115	0.956	1.485	1.161	1.299	1.539	1.273	1.369	0.87	0.84	1.368	1.253
FALSE	High	Master Protein	TGGT1_254580-t26_1-p1	transcript=TGGT1_254580-t26_1 | gene=TGGT1_254580 | organism=Toxoplasma_gondii_GT1 | gene_product=UDP-galactose transporter family protein [Source:UniProtKB/TrEMBL;Acc:S7UMX4] | transcript_product=UDP-galactose transporter family protein | location=TGGT1_chrIII:1827569-1829516(-) | protein_length=413 | sequence_SO=chromosome | SO=protein_coding_gene | is_pseudo=false	0.002	4.017	6	1	2	1	413	45.5	9.42	2.65	1	14.843	1.391	100	100	100	1e-17	0.110763	1e-17	1e-17	1e-17	1.73608e-16	0.510842	1.34062e-16	1.03865e-16	1.03758e-16	488.44	114.29	0	0	0	100		2.203	1.391	100	0.319	100	100	0.702	100	0.01	100	100	1.457
FALSE	Low	Master Protein	TGGT1_246130-t26_1-p1	transcript=TGGT1_246130-t26_1 | gene=TGGT1_246130 | organism=Toxoplasma_gondii_GT1 | gene_product=SERPIN domain-containing protein [Source:UniProtKB/TrEMBL;Acc:S7V152] | transcript_product=serpin (serine proteinase inhibitor) superfamily protein | location=TGGT1_chrXII:2610457-2612239(+) | protein_length=432 | sequence_SO=chromosome | SO=protein_coding_gene | is_pseudo=false	0.052	1.735	4	1	1	1	432	47.4	6.62	0	1
FALSE	Low	Master Protein	TGGT1_217182-t26_1-p1	transcript=TGGT1_217182-t26_1 | gene=TGGT1_217182 | organism=Toxoplasma_gondii_GT1 | gene_product=RNA-dependent RNA polymerase RDP [Source:UniProtKB/TrEMBL;Acc:S7ULW3] | transcript_product=RNA-dependent RNA polymerase RDP | location=TGGT1_chrXI:5581444-5605950(-) | protein_length=2869 | sequence_SO=chromosome | SO=protein_coding_gene | is_pseudo=false	0.068	1.626	0	1	1	1	2869	313.1	7.78	0	1	0.383	0.468	0.182	0.903	0.234	7.98022e-09	0.165264	0.00404945	0.339066	1.88738e-14	1.2678e-07	0.626293	0.0363815	0.86944	1.86774e-13	4.47	6.74	93.99	33.86	87.69	0.372	0.383	1.065	0.49	0.072	0.468	0.182	0.027	0.498	1.171	0.903	0.501	0.574	0.065
FALSE	High	Master Protein	TGGT1_273460-t26_1-p1	transcript=TGGT1_273460-t26_1 | gene=TGGT1_273460 | organism=Toxoplasma_gondii_GT1 | gene_product=Eukaryotic translation initiation factor 3 subunit L [Source:UniProtKB/TrEMBL;Acc:A0A125YVE2] | transcript_product=eukaryotic translation initiation factor 3 subunit 6 interacting protein | location=TGGT1_chrVIII:3489847-3495730(-) | protein_length=639 | sequence_SO=chromosome | SO=protein_coding_gen…	0	53.841	31	18	80	18	639	75	5.71	70.07	18	1.004	0.965	0.902	1.117	0.862	0.890299	0.737989	0.724637	0.696518	0.222215	0.985103	0.94258	0.969176	0.9684	0.582135	15.29	21.64	2.83	40.98	47.27	0.814	1.004	1.107	1.129	0.549	0.965	0.919	0.533	0.902	0.808	1.117	1.425	0.862	0.654
FALSE	High	Master Protein	TGGT1_270810-t26_1-p1	transcript=TGGT1_270810-t26_1 | gene=TGGT1_270810 | organism=Toxoplasma_gondii_GT1 | gene_product=hypothetical protein | transcript_product=hypothetical protein | location=TGGT1_chrVIII:4976688-4979395(-) | protein_length=567 | sequence_SO=chromosome | SO=protein_coding_gene | is_pseudo=false	0	13.49	10	5	10	5	567	60.6	7.18	2.13	5	0.953	0.82	1.001	1.336	1.227	0.857163	0.779027	0.573591	0.929459	0.433264	0.985103	0.943561	0.926406	0.992622	0.80811	11.1	8.8	36.8	22.53	5.26	1.18	0.953	0.887	0.774	1.421	0.82	1.001	1.4	0.752	1.336	0.917	1.539	0.974	1.271
FALSE	High	Master Protein	TGGT1_290950-t26_1-p1	transcript=TGGT1_290950-t26_1 | gene=TGGT1_290950 | organism=Toxoplasma_gondii_GT1 | gene_product=Clathrin heavy chain [Source:UniProtKB/TrEMBL;Acc:A0A125YSB0] | transcript_product=putative clathrin heavy chain | location=TGGT1_chrIX:3770246-3782423(-) | protein_length=1731 | sequence_SO=chromosome | SO=protein_coding_gene | is_pseudo=false	0	144.942	31	43	180	43	1731	194.4	6.06	188.5	43	0.966	0.833	0.81	1.253	1.039	0.923381	0.913299	0.891894	0.934647	0.873381	0.985103	0.974587	0.982055	0.992622	0.97132	7.78	6.06	2.24	31.53	2.44	0.846	1.02	0.966	1.046	0.833	0.8	0.832	0.81	0.798	0.987	1.253	1.554	1.022	1.039
FALSE	High	Master Protein	TGGT1_243710-t26_1-p1	transcript=TGGT1_243710-t26_1 | gene=TGGT1_243710 | organism=Toxoplasma_gondii_GT1 | gene_product=T-complex protein beta subunit [Source:UniProtKB/TrEMBL;Acc:S7UFS3] | transcript_product=t-complex protein beta subunit | location=TGGT1_chrVI:2717493-2725570(+) | protein_length=568 | sequence_SO=chromosome | SO=protein_coding_gene | is_pseudo=false	0	36.188	29	14	51	14	568	61.4	5.92	32.22	14	1.168	0.674	0.75	1.912	1.128	0.286456	0.455182	0.983668	0.295786	0.759399	0.81222	0.8874	0.995031	0.850784	0.940377	6.57	16.79	7.48	62.27	88.19	0.888	1.168	1.219	0.76	0.246	0.674	0.79	0.265	0.75	1.109	1.912	3.007	1.128	0.457
FALSE	Medium	Master Protein	TGGT1_201790-t26_1-p1	transcript=TGGT1_201790-t26_1 | gene=TGGT1_201790 | organism=Toxoplasma_gondii_GT1 | gene_product=FHA domain-containing protein [Source:UniProtKB/TrEMBL;Acc:S7UV44] | transcript_product=FHA domain-containing protein | location=TGGT1_chrVIIa:3683201-3688810(-) | protein_length=556 | sequence_SO=chromosome | SO=protein_coding_gene | is_pseudo=false	0.026	2.143	2	1	1	1	556	62.6	9.55	0	1	1.058	0.651	0.816	1.4	1.11	0.642966	0.675573	0.880064	0.83117	0.980402	0.965361	0.931816	0.981008	0.980849	0.997174	27.4	26.63	4.1	19.29	82.26	0.863	1.058	1.254	0.406	0.793	0.651	0.35	0.839	0.816	1.218	1.4	3.548	0.494	1.11
FALSE	High	Master Protein	TGGT1_262380-t26_1-p1	transcript=TGGT1_262380-t26_1 | gene=TGGT1_262380 | organism=Toxoplasma_gondii_GT1 | gene_product=Elongation factor Tu [Source:UniProtKB/TrEMBL;Acc:A0A125YIN4] | transcript_product=putative elongation factor Tu | location=TGGT1_chrVIIb:1291090-1294751(-) | protein_length=552 | sequence_SO=chromosome | SO=protein_coding_gene | is_pseudo=false	0	53.56	34	15	47	15	552	59.6	8.15	34.99	15	1.057	1.147	1.125	0.941	1.048	0.649559	0.391609	0.424262	0.397789	0.909114	0.965361	0.851712	0.904295	0.902143	0.978711	7.23	19.85	10.57	22.49	8.34	0.802	1.057	1.108	1.3	1.147	0.881	1.125	1.205	0.837	0.817	0.941	1.341	0.914	1.048
FALSE	High	Master Protein	TGGT1_219860-t26_1-p1	transcript=TGGT1_219860-t26_1 | gene=TGGT1_219860 | organism=Toxoplasma_gondii_GT1 | gene_product=DNA helicase [Source:UniProtKB/TrEMBL;Acc:S7V1T5] | transcript_product=putative replication licensing factor | location=TGGT1_chrXII:515884-525132(-) | protein_length=972 | sequence_SO=chromosome | SO=protein_coding_gene | is_pseudo=false	0	37.935	18	13	41	13	972	108.1	5.08	31.29	13	0.956	0.956	1.023	0.911	1.031	0.871767	0.710531	0.544319	0.351169	0.833146	0.985103	0.933509	0.926406	0.87144	0.958229	15.48	57.71	13.57	47.44	11.17	0.83	0.956	1.067	1.566	0.619	0.956	1.29	0.929	1.023	0.677	0.911	1.34	1.031	0.676
FALSE	High	Master Protein	TGGT1_226700-t26_1-p1	transcript=TGGT1_226700-t26_1 | gene=TGGT1_226700 | organism=Toxoplasma_gondii_GT1 | gene_product=TNase-like domain-containing protein [Source:UniProtKB/TrEMBL;Acc:S7UX03] | transcript_product=putative nuclease | location=TGGT1_chrX:1334516-1336804(+) | protein_length=449 | sequence_SO=chromosome | SO=protein_coding_gene | is_pseudo=false	0.009	2.665	2	1	3	1	449	50.4	8.87	0	1	1.41	0.267	0.403	0.991	0.453	0.0261103	0.00543591	0.203248	0.478801	0.00151789	0.198062	0.0485834	0.771623	0.915333	0.00980615	10.56	100.55	85.25	8.75	93.61	1.144	1.511	1.41	0.83	0.267	0.01	0.949	0.403	0.01	0.991	0.936	100	0.822	0.25
FALSE	Low	Master Protein	TGGT1_270670-t26_1-p1	transcript=TGGT1_270670-t26_1 | gene=TGGT1_270670 | organism=Toxoplasma_gondii_GT1 | gene_product=hypothetical protein | transcript_product=hypothetical protein | location=TGGT1_chrVIII:5085267-5091509(+) | protein_length=1326 | sequence_SO=chromosome | SO=protein_coding_gene | is_pseudo=false	0.067	1.643	1	1	3	1	1326	146.3	6.58	0	1	1.695	0.547	1.065	2.103	0.998	0.000800476	0.169366	0.491801	0.193435	0.697424	0.00969786	0.629251	0.926268	0.722729	0.921624	21.88	74.68	94.72	38.24	5.39	1.056	1.695	1.945	0.364	1.162	0.547	0.384	1.969	1.065	2.646	0.859	2.103	0.963	0.998
FALSE	Low	Master Protein	TGGT1_234970-t26_1-p1	transcript=TGGT1_234970-t26_1 | gene=TGGT1_234970 | organism=Toxoplasma_gondii_GT1 | gene_product=Protein kinase domain-containing protein [Source:UniProtKB/TrEMBL;Acc:S7UVW5] | transcript_product=Tyrosine kinase-like (TKL) protein | location=TGGT1_chrX:4456511-4472425(+) | protein_length=1976 | sequence_SO=chromosome | SO=protein_coding_gene | is_pseudo=false	0.073	1.584	1	1	1	1	1976	216.1	6.37	0	1	0.802	1.652	1.119	0.426	0.703	0.21592	0.025201	0.431179	0.00302246	0.0203011	0.732264	0.17651	0.906025	0.0226417	0.10727	19.7	51.97	88.94	27.57	18.07	0.802	0.925	0.677	2.231	0.213	1.652	1.79	0.197	1.119	0.359	1.288	0.426	0.801	0.274
FALSE	Medium	Master Protein	TGGT1_248860-t26_1-p1	transcript=TGGT1_248860-t26_1 | gene=TGGT1_248860 | organism=Toxoplasma_gondii_GT1 | gene_product=hypothetical protein | transcript_product=hypothetical protein | location=TGGT1_chrXII:4161118-4163052(-) | protein_length=458 | sequence_SO=chromosome | SO=protein_coding_gene | is_pseudo=false	0.016	2.405	2	1	1	1	458	50.2	10.89	0	1	100	0.776	100	1.083	0.914	1e-17	0.984339	1e-17	0.637528	0.536256	1.73608e-16	0.99731	1.34062e-16	0.950029	0.86452	0	11.89	0	26.05	67.89	0.933	100	100	0.702	0.844	0.776	0.655	100	100	0.893	1.083	100	0.627	0.914
FALSE	Medium	Master Protein	TGGT1_217160-t26_1-p1	transcript=TGGT1_217160-t26_1 | gene=TGGT1_217160 | organism=Toxoplasma_gondii_GT1 | gene_product=Derlin [Source:UniProtKB/TrEMBL;Acc:A0A125YQQ7] | transcript_product=Der1 family protein | location=TGGT1_chrXI:5617879-5619252(-) | protein_length=212 | sequence_SO=chromosome | SO=protein_coding_gene | is_pseudo=false	0.034	1.968	3	1	1	1	212	24.7	8.75	0	1	100	0.01	2.291	1.508	0.128	1e-17	1e-17	0.0254237	0.680486	1.47016e-11	1.73608e-16	1.60374e-16	0.19304	0.967278	1.27117e-10	0	0	0	39.74	944.97	100	1.537	100	0.01	1.49	0.01		2.291		100	1.104	1.508		1.645
FALSE	High	Master Protein	TGGT1_231130-t26_1-p1	transcript=TGGT1_231130-t26_1 | gene=TGGT1_231130 | organism=Toxoplasma_gondii_GT1 | gene_product=Peptidase_M28 domain-containing protein [Source:UniProtKB/TrEMBL;Acc:S7V256] | transcript_product=hypothetical protein | location=TGGT1_chrVIII:1250007-1256661(+) | protein_length=711 | sequence_SO=chromosome | SO=protein_coding_gene | is_pseudo=false	0.001	5.217	3	2	5	2	711	77	8.21	4.54	2	0.864	1.634	1.325	1.046	1.11	0.433677	0.0332979	0.25891	0.572281	0.83352	0.922411	0.220997	0.834653	0.940113	0.958229	9.71	8.42	18.68	51.95	22.4	0.811	0.864	1.001	1.634	1.727	0.428	1.325	1.492	0.428	0.679	1.046	2.203	1.11	1.806
FALSE	High	Master Protein	TGGT1_244310-t26_1-p1	transcript=TGGT1_244310-t26_1 | gene=TGGT1_244310 | organism=Toxoplasma_gondii_GT1 | gene_product=OBG-type G domain-containing protein [Source:UniProtKB/TrEMBL;Acc:A0A125YSF1] | transcript_product=GTP-binding protein | location=TGGT1_chrVI:3097647-3101222(+) | protein_length=367 | sequence_SO=chromosome | SO=protein_coding_gene | is_pseudo=false	0	6.087	7	3	4	3	367	40.8	9.03	0	3	0.934	1.125	0.858	1.245	0.828	0.761181	0.245725	0.801577	0.91996	0.268179	0.978747	0.738772	0.973927	0.990374	0.641365	9.67	0.73	30.62	33.87	36.13	0.877	0.934	1.135	1.125	0.593	1.13	0.858	0.507	1.081	0.859	1.245	1.529	0.828	0.666
FALSE	Low	Master Protein	TGGT1_204360-t26_1-p1	transcript=TGGT1_204360-t26_1 | gene=TGGT1_204360 | organism=Toxoplasma_gondii_GT1 | gene_product=Peptidase_S8 domain-containing protein [Source:UniProtKB/TrEMBL;Acc:S7UU74] | transcript_product=subtilisin SUB4 | location=TGGT1_chrVIIa:1751612-1758824(+) | protein_length=1242 | sequence_SO=chromosome | SO=protein_coding_gene | is_pseudo=false	0.067	1.64	1	1	1	1	1242	134.3	5.27	0	1	0.721	0.888	0.664	0.741	0.496	0.0589135	0.618252	0.790064	0.138	6.18713e-05	0.349048	0.920342	0.972757	0.613096	0.000437701	5.14	9.35	4.37	48.63	43.66	0.721	0.672	0.747	0.948	0.049	0.888	0.684	0.033	0.664	0.741	2.254	0.558	0.703	0.11
FALSE	High	Master Protein	TGGT1_310080-t26_1-p1	transcript=TGGT1_310080-t26_1 | gene=TGGT1_310080 | organism=Toxoplasma_gondii_GT1 | gene_product=AMP-binding domain-containing protein [Source:UniProtKB/TrEMBL;Acc:S7USA9] | transcript_product=AMP-binding enzyme domain-containing protein | location=TGGT1_chrXI:1008086-1011664(-) | protein_length=789 | sequence_SO=chromosome | SO=protein_coding_gene | is_pseudo=false	0	22.161	18	10	21	10	789	87.8	5.6	5.55	10	0.911	0.731	0.611	1.94	1.038	0.646683	0.903645	0.664238	0.278157	0.957345	0.965361	0.974587	0.941345	0.844306	0.990916	25.1	6.77	31.45	52.33	24.43	0.625	0.911	1.096	0.807	0.731	0.699	0.611	0.504	0.86	1.255	1.94	4.484	1.038	0.867
FALSE	High	Master Protein	TGGT1_227320-t26_1-p1	transcript=TGGT1_227320-t26_1 | gene=TGGT1_227320 | organism=Toxoplasma_gondii_GT1 | gene_product=hypothetical protein | transcript_product=hypothetical protein | location=TGGT1_chrX:926946-935712(-) | protein_length=1229 | sequence_SO=chromosome | SO=protein_coding_gene | is_pseudo=false	0	11.436	6	5	5	5	1229	131.8	9.94	0	5	0.856	2.624	1.702	0.47	1.39	0.400445	0.00357607	0.102066	0.00686196	0.471083	0.907604	0.0328157	0.540572	0.0494353	0.832267	146.99	49.01	95.65	10.66	66.37	0.01	100	0.856	100	2.624	1.757	0.604	100	1.702		0.504	0.437	100	1.39
FALSE	High	Master Protein	TGGT1_222050-t26_1-p1	transcript=TGGT1_222050-t26_1 | gene=TGGT1_222050 | organism=Toxoplasma_gondii_GT1 | gene_product=hypothetical protein | transcript_product=hypothetical protein | location=TGGT1_chrII:769157-774451(-) | protein_length=1477 | sequence_SO=chromosome | SO=protein_coding_gene | is_pseudo=false	0.001	5.234	2	2	2	2	1477	155.8	6.1	0	2	1.122	0.579	0.649	1.872	1.125	0.410949	0.471803	0.756254	0.322319	0.991648	0.91043	0.901077	0.972757	0.866168	0.999418	30.81	2.49	53.2	5.67	7.83	1.355	1.122	0.84	0.793	0.579	0.569	1.075	0.649	0.478	1.735	1.944	1.872	1.443	1.125
FALSE	High	Master Protein	TGGT1_261970-t26_1-p1	transcript=TGGT1_261970-t26_1 | gene=TGGT1_261970 | organism=Toxoplasma_gondii_GT1 | gene_product=hypothetical protein | transcript_product=hypothetical protein | location=TGGT1_chrVIIb:1426346-1428657(+) | protein_length=677 | sequence_SO=chromosome | SO=protein_coding_gene | is_pseudo=false	0	7.699	6	2	2	2	677	73.2	10.48	3.03	2	0.682	8.075	5.757	0.109	1.249	0.0253125	1.04624e-09	4.22173e-05	3.973e-11	0.670984	0.193756	1.47159e-08	0.000458512	3.80016e-10	0.90874	0	912.02	1283.43	800.51	126.42			0.682		100	0.652		100	0.331		0.01	1.186		2.707
FALSE	High	Master Protein	TGGT1_245680-t26_1-p1	transcript=TGGT1_245680-t26_1 | gene=TGGT1_245680 | organism=Toxoplasma_gondii_GT1 | gene_product=Ribosomal protein RPL21 [Source:UniProtKB/TrEMBL;Acc:S7WHD1] | transcript_product=ribosomal protein RPL21 | location=TGGT1_chrXII:2403148-2403621(+) | protein_length=157 | sequence_SO=chromosome | SO=protein_coding_gene | is_pseudo=false	0	41.338	61	9	98	9	157	17.9	10.35	120.59	9	0.931	1.214	0.929	0.814	1.067	0.746475	0.30429	0.680011	0.21759	0.99081	0.973495	0.793558	0.945617	0.764118	0.999418	59.44	19.36	22.59	5.71	9.98	1.785	0.931	0.665	1.214	0.969	1.372	1.703	0.806	0.929	0.784	0.961	0.814	0.919	1.067
FALSE	High	Master Protein	TGGT1_306080-t26_1-p1	transcript=TGGT1_306080-t26_1 | gene=TGGT1_306080 | organism=Toxoplasma_gondii_GT1 | gene_product=ATP-dependent DNA helicase, RecQ family protein [Source:UniProtKB/TrEMBL;Acc:S7UID0] | transcript_product=ATP-dependent DNA helicase, RecQ family protein | location=TGGT1_chrIX:5586396-5596597(+) | protein_length=1625 | sequence_SO=chromosome | SO=protein_coding_gene | is_pseudo=false	0.001	4.217	1	1	31	1	1625	175.1	6.65	0	1	0.762	0.746	0.43	1.493	0.738	0.120928	0.658381	0.252288	0.700291	0.035288	0.55786	0.927717	0.830951	0.96852	0.171142	47.87	1.73	37.5	51.1	49.95	0.576	1.247	0.762	0.746	0.095	0.754	0.43	0.118	0.575	1.493	2.318	0.978	1.113	0.22
FALSE	High	Master Protein	TGGT1_264440-t26_1-p1	transcript=TGGT1_264440-t26_1 | gene=TGGT1_264440 | organism=Toxoplasma_gondii_GT1 | gene_product=Signal recognition particle receptor beta subunit protein [Source:UniProtKB/TrEMBL;Acc:A0A125YKE8] | transcript_product=signal recognition particle receptor beta subunit protein | location=TGGT1_chrIX:2059841-2063738(-) | protein_length=347 | sequence_SO=chromosome | SO=protein_coding_gene | is_pseud…	0	14.494	17	5	18	5	347	37.4	7.15	5.32	5	0.926	0.973	0.902	1.04	1.319	0.722977	0.489237	0.724674	0.562554	0.273184	0.973495	0.909352	0.969176	0.940113	0.645854	8.4	17.9	15.77	11.46	36.98	0.926	1.003	0.877	0.973	1.191	0.869	0.902	1.264	0.815	0.96	1.04	1.676	0.99	1.319
FALSE	High	Master Protein	TGGT1_249670-t26_1-p1	transcript=TGGT1_249670-t26_1 | gene=TGGT1_249670 | organism=Toxoplasma_gondii_GT1 | gene_product=Pept_C1 domain-containing protein [Source:UniProtKB/TrEMBL;Acc:S7W8W7] | transcript_product=cathepsin B | location=TGGT1_chrXII:4657429-4662487(-) | protein_length=569 | sequence_SO=chromosome | SO=protein_coding_gene | is_pseudo=false	0	6.07	6	2	3	2	569	62.1	5.59	1.76	2	1.067	0.749	0.662	1.443	1.192	0.606499	0.956386	0.786413	0.768675	0.554843	0.963532	0.988147	0.972757	0.971965	0.86452	25.37	63.4	39.84	4.87	13.87	0.885	1.067	1.319	0.749	1.308	0.396	0.662	1.396	0.522	1.443	1.395	3.01	1.08	1.825
FALSE	High	Master Protein	TGGT1_295125-t26_1-p1	transcript=TGGT1_295125-t26_1 | gene=TGGT1_295125 | organism=Toxoplasma_gondii_GT1 | gene_product=Protein kinase domain-containing protein [Source:UniProtKB/TrEMBL;Acc:S7UI50] | transcript_product=rhoptry protein ROP4 | location=TGGT1_chrIa:1394541-1396277(-) | protein_length=365 | sequence_SO=chromosome | SO=protein_coding_gene | is_pseudo=false	0	49.217	30	10	128	4	365	40.1	5.3	202.44	10	1.04	0.467	0.493	1.413	0.647	0.720621	0.124026	0.386977	0.811446	0.0050596	0.973495	0.53207	0.898096	0.980849	0.0305001	17.84	3.04	5.39	13.4	11.46	0.775	1.04	1.166	0.467	0.458	0.866	0.493	0.476	1.01	1.285	1.413	1.982	0.6	0.647
FALSE	High	Master Protein	TGGT1_210690-t26_1-p1	transcript=TGGT1_210690-t26_1 | gene=TGGT1_210690 | organism=Toxoplasma_gondii_GT1 | gene_product=40S ribosomal protein S6 [Source:UniProtKB/TrEMBL;Acc:A0A125YZ10] | transcript_product=ribosomal protein RPS6 | location=TGGT1_chrIV:2087216-2087986(+) | protein_length=256 | sequence_SO=chromosome | SO=protein_coding_gene | is_pseudo=false	0	88.742	44	15	171	15	256	28.9	10.8	250.67	15	0.799	1.324	1.024	1.049	1.104	0.20786	0.196945	0.543116	0.576902	0.852216	0.718762	0.67777	0.926406	0.940113	0.964943	7.98	0.71	13.74	1.33	10.62	1.809	0.758	0.799	1.149	1.33	1.324	2.068	0.929	1.024	1.049	0.911	1.058	1.025	1.198
FALSE	High	Master Protein	TGGT1_270690-t26_1-p1	transcript=TGGT1_270690-t26_1 | gene=TGGT1_270690 | organism=Toxoplasma_gondii_GT1 | gene_product=Arginyl-tRNA synthetase [Source:UniProtKB/TrEMBL;Acc:A0A125YS10] | transcript_product=arginyl-tRNA synthetase | location=TGGT1_chrVIII:5067864-5080628(-) | protein_length=1174 | sequence_SO=chromosome | SO=protein_coding_gene | is_pseudo=false	0	17.5	8	8	10	8	1174	130.2	6.58	3.71	8	1.269	0.796	0.953	1.136	1.04	0.115032	0.867019	0.643324	0.730513	0.985638	0.542617	0.969254	0.941318	0.969165	0.998944	13.03	26.11	12.1	39.71	3.01	1.02	1.38	1.269	1.298	0.796	0.677	0.953	1.037	0.727	0.832	1.136	1.477	1.061	1.04
FALSE	High	Master Protein	TGGT1_297430-t26_1-p1	transcript=TGGT1_297430-t26_1 | gene=TGGT1_297430 | organism=Toxoplasma_gondii_GT1 | gene_product=FoP_duplication domain-containing protein [Source:UniProtKB/TrEMBL;Acc:S7UK03] | transcript_product=hypothetical protein | location=TGGT1_chrII:1749482-1752364(+) | protein_length=248 | sequence_SO=chromosome | SO=protein_coding_gene | is_pseudo=false	0	9.368	17	3	12	3	248	25.3	11.63	10.78	3	0.898	0.781	0.36	1.612	0.52	0.587028	0.901719	0.132658	0.554888	0.000759635	0.956627	0.974587	0.620276	0.940113	0.00506029	3.27	24.3	58.51	21.62	22	0.898	0.919	0.461	0.934	0.281	0.781	0.839	0.258	0.36	1.847	1.612	0.666	1.725	0.453
FALSE	High	Master Protein	TGGT1_262670-t26_1-p1	transcript=TGGT1_262670-t26_1 | gene=TGGT1_262670 | organism=Toxoplasma_gondii_GT1 | gene_product=60S ribosomal protein L18a [Source:UniProtKB/TrEMBL;Acc:A0A125YSP4] | transcript_product=ribosomal protein RPL18A | location=TGGT1_chrVIIb:1067095-1069205(+) | protein_length=183 | sequence_SO=chromosome | SO=protein_coding_gene | is_pseudo=false	0	44.886	51	11	82	11	183	21.3	10.65	97.58	11	0.912	1.294	1.183	0.853	0.977	0.65351	0.221857	0.368008	0.267508	0.609977	0.965361	0.713837	0.89526	0.834054	0.892312	52.1	2.54	38.06	7.58	2.4	1.407	0.912	0.64	1.186	1.316	1.294	1.756	1.183	0.879	0.812	0.853	1.276	0.977	0.961
FALSE	High	Master Protein	TGGT1_260170-t26_1-p1	transcript=TGGT1_260170-t26_1 | gene=TGGT1_260170 | organism=Toxoplasma_gondii_GT1 | gene_product=Elongation factor G, mitochondrial [Source:UniProtKB/TrEMBL;Acc:S7WEH9] | transcript_product=putative elongation factor EF-G | location=TGGT1_chrVIIb:2455204-2462803(-) | protein_length=883 | sequence_SO=chromosome | SO=protein_coding_gene | is_pseudo=false	0.002	3.696	4	2	2	2	883	96.6	8.18	0	2	1.306	0.848	1.008	2.367	100	0.079745	0.811964	0.563916	0.106199	1e-17	0.422297	0.950701	0.926406	0.520322	1.03758e-16	23.56	0	61.07	73.27	0	0.489	1.306	1.513	0.848			1.008	0.593	1.548	100	2.367	1.197	100
FALSE	High	Master Protein	TGGT1_226570-t26_1-p1	transcript=TGGT1_226570-t26_1 | gene=TGGT1_226570 | organism=Toxoplasma_gondii_GT1 | gene_product=hypothetical protein | transcript_product=hypothetical protein | location=TGGT1_chrX:1439365-1440887(-) | protein_length=139 | sequence_SO=chromosome | SO=protein_coding_gene | is_pseudo=false	0	13.055	22	2	17	2	139	15	5.36	27.5	2	0.971	1.059	1.567	1.077	1.097	0.948912	0.412146	0.14202	0.625759	0.877564	0.987619	0.865097	0.646524	0.949833	0.971613	25.66	56.56	23.41	6.75	15.73	0.971	1.241	0.828	0.567	1.463	1.059	1.567	1.815	0.691	1.126	1.077	0.738	0.981	1.349
FALSE	High	Master Protein	TGGT1_249030-t26_1-p1	transcript=TGGT1_249030-t26_1 | gene=TGGT1_249030 | organism=Toxoplasma_gondii_GT1 | gene_product=Endo/exonuclease/phosphatase domain-containing protein [Source:UniProtKB/TrEMBL;Acc:S7W971] | transcript_product=endonuclease/exonuclease/phosphatase family protein | location=TGGT1_chrXII:4253966-4255780(-) | protein_length=541 | sequence_SO=chromosome | SO=protein_coding_gene | is_pseudo=false	0	11.39	12	4	6	4	541	60.2	8.02	0	4	1.095	0.818	0.817	1.581	1.325	0.502801	0.836614	0.879297	0.590829	0.310447	0.942037	0.956448	0.981008	0.942063	0.689108	5.39	10.66	5.16	30.11	40.82	1.187	1.055	1.095	0.881	0.818	0.593	0.765	0.817	0.846	1.194	1.902	1.581	0.794	1.689
FALSE	High	Master Protein	TGGT1_271780-t26_1-p1	transcript=TGGT1_271780-t26_1 | gene=TGGT1_271780 | organism=Toxoplasma_gondii_GT1 | gene_product=Filamin/ABP280 repeat-containing protein [Source:UniProtKB/TrEMBL;Acc:S7WK38] | transcript_product=Filamin/ABP280 repeat-containing protein | location=TGGT1_chrVIII:4362446-4378957(-) | protein_length=2721 | sequence_SO=chromosome | SO=protein_coding_gene | is_pseudo=false	0	16.492	3	7	8	7	2721	296.6	6.93	1.98	7	1.474	1.018	1.379	0.976	1.387	0.0125531	0.380959	0.226179	0.4529	0.194742	0.116792	0.840122	0.812186	0.915333	0.53948	15.53	36.39	8.6	35.61	44.57	1.628	1.066	1.474	0.768	1.575	1.018	0.919	1.379	1.459	100	0.787	0.976	100	1.387
FALSE	High	Master Protein	TGGT1_266080-t26_1-p1	transcript=TGGT1_266080-t26_1 | gene=TGGT1_266080 | organism=Toxoplasma_gondii_GT1 | gene_product=hypothetical protein | transcript_product=hypothetical protein | location=TGGT1_chrIX:1138397-1140583(+) | protein_length=728 | sequence_SO=chromosome | SO=protein_coding_gene | is_pseudo=false	0	11.507	7	5	11	5	728	81.2	8.69	3.87	5	0.844	0.903	0.821	1.465	1.251	0.3546	0.565395	0.871086	0.737248	0.399341	0.879451	0.91465	0.981008	0.969165	0.777125	0.33	7.57	1.14	12.95	33.49	0.889	0.844	0.842	0.952	0.838	0.903	0.821	0.629	0.827	1.465	1.147	1.593	1.251	0.926
FALSE	High	Master Protein	TGGT1_321680-t26_1-p1	transcript=TGGT1_321680-t26_1 | gene=TGGT1_321680 | organism=Toxoplasma_gondii_GT1 | gene_product=HABP4_PAI-RBP1 domain-containing protein [Source:UniProtKB/TrEMBL;Acc:A0A125YT80] | transcript_product=hypothetical protein | location=TGGT1_chrIb:1645852-1649258(-) | protein_length=372 | sequence_SO=chromosome | SO=protein_coding_gene | is_pseudo=false	0	22.458	26	8	24	8	372	40.7	6.16	10.41	8	0.847	0.631	0.528	2.226	1.365	0.364112	0.416183	0.46589	0.146548	0.184018	0.885121	0.867127	0.914371	0.625146	0.521586	5.3	29.51	5.5	23.88	123.66	0.847	0.878	0.674	0.631	0.144	0.787	0.548	0.15	0.528	2.226	1.867	4.086	1.365	0.226
FALSE	High	Master Protein	TGGT1_318410-t26_1-p1	transcript=TGGT1_318410-t26_1 | gene=TGGT1_318410 | organism=Toxoplasma_gondii_GT1 | gene_product=Putative TCP-1 chaperonin [Source:UniProtKB/TrEMBL;Acc:A0A125YLR7] | transcript_product=putative TCP-1 chaperonin | location=TGGT1_chrIV:1295296-1300413(+) | protein_length=537 | sequence_SO=chromosome | SO=protein_coding_gene | is_pseudo=false	0	16.844	14	7	24	7	537	58.6	7.08	2.23	7	0.876	0.632	0.719	1.855	0.764	0.486144	0.346437	0.917194	0.334766	0.0564818	0.941301	0.82913	0.985943	0.86944	0.243569	4.95	32.48	2.95	20.31	75.11	0.876	0.848	0.995	0.809	0.291	0.632	0.734	0.219	0.719	0.945	1.855	2.109	0.764	0.438
FALSE	High	Master Protein	TGGT1_269190-t26_1-p1	transcript=TGGT1_269190-t26_1 | gene=TGGT1_269190 | organism=Toxoplasma_gondii_GT1 | gene_product=Gp_dh_N domain-containing protein [Source:UniProtKB/TrEMBL;Acc:S7WDK9] | transcript_product=glyceraldehyde-3-phosphate dehydrogenase GAPDH2 | location=TGGT1_chrVIII:6001367-6005276(-) | protein_length=995 | sequence_SO=chromosome | SO=protein_coding_gene | is_pseudo=false	0	73.553	26	19	110	18	995	105.1	5.05	133.38	19	1.005	0.914	0.903	1.106	1.285	0.884957	0.863014	0.722876	0.677988	0.294629	0.985103	0.967297	0.969176	0.965378	0.665443	4.79	7.92	16.98	16.06	1.31	1.005	0.972	1.064	0.868	1.14	0.914	0.81	1.143	0.903	1.106	0.986	1.231	1.028	1.297
FALSE	High	Master Protein	TGGT1_260600-t26_1-p1	transcript=TGGT1_260600-t26_1 | gene=TGGT1_260600 | organism=Toxoplasma_gondii_GT1 | gene_product=PUM-HD domain-containing protein [Source:UniProtKB/TrEMBL;Acc:S7UYD1] | transcript_product=Pumilio-family RNA binding repeat-containing protein | location=TGGT1_chrVIIb:2104300-2113824(+) | protein_length=1676 | sequence_SO=chromosome | SO=protein_coding_gene | is_pseudo=false	0	40.625	11	15	18	15	1676	172.4	7.77	11.48	15	1.148	1.165	1.028	0.983	1.277	0.336416	0.22977	0.536995	0.464761	0.354247	0.868902	0.723622	0.926406	0.915333	0.736	7.91	11.12	12.3	15.84	7.58	0.909	1.148	1.209	1.165	1.253	0.637	1.028	1.534	0.943	0.983	0.888	1.481	1.277	1.466
FALSE	High	Master Protein	TGGT1_308920-t26_1-p1	transcript=TGGT1_308920-t26_1 | gene=TGGT1_308920 | organism=Toxoplasma_gondii_GT1 | gene_product=Splicing factor U2AF protein [Source:UniProtKB/TrEMBL;Acc:S7W7M9] | transcript_product=splicing factor U2AF protein | location=TGGT1_chrXI:318912-325751(-) | protein_length=770 | sequence_SO=chromosome | SO=protein_coding_gene | is_pseudo=false	0	29.537	16	9	55	9	770	83.1	6.55	41.2	9	0.732	0.832	0.593	0.938	0.798	0.0718317	0.910742	0.621768	0.392729	0.097244	0.387707	0.974587	0.93387	0.902143	0.342555	18.54	39.3	73.69	19.91	35.71	1.046	0.732	0.651	1.132	0.295	0.832	1.18	0.206	0.593	0.827	1.221	0.938	0.798	0.356
FALSE	High	Master Protein	TGGT1_234470-t26_1-p1	transcript=TGGT1_234470-t26_1 | gene=TGGT1_234470 | organism=Toxoplasma_gondii_GT1 | gene_product=hypothetical protein | transcript_product=hypothetical protein | location=TGGT1_chrX:4303922-4306325(-) | protein_length=587 | sequence_SO=chromosome | SO=protein_coding_gene | is_pseudo=false	0.001	4.347	3	2	5	2	587	64	6.57	0	2	0.921	0.49	0.505	1.493	0.766	0.69691	0.224956	0.412305	0.699559	0.202788	0.973495	0.714969	0.901174	0.9684	0.555477	0.49	24.78	9.82	15.29	40.1	1.099	0.921	0.918	0.49	0.01	0.589	0.505	0.01	0.54	1.493	2.191	1.339	0.766	0.01
FALSE	High	Master Protein	TGGT1_233520-t26_1-p1	transcript=TGGT1_233520-t26_1 | gene=TGGT1_233520 | organism=Toxoplasma_gondii_GT1 | gene_product=ATP-dependent RNA helicase [Source:UniProtKB/TrEMBL;Acc:S7V2Z5] | transcript_product=ATP-dependent RNA helicase | location=TGGT1_chrVIII:2686087-2689735(+) | protein_length=801 | sequence_SO=chromosome | SO=protein_coding_gene | is_pseudo=false	0	17.634	12	8	17	7	801	88.8	7.68	1.99	8	1.069	0.796	0.769	1.298	0.921	0.598549	0.80639	0.975887	0.991095	0.398159	0.956627	0.949222	0.995022	0.995636	0.777111	19.06	36.34	13.07	29.82	8.63	0.923	1.207	1.069	1.054	0.577	0.796	0.769	0.607	0.843	1.037	1.298	2.015	0.978	0.75
FALSE	High	Master Protein	TGGT1_318230-t26_1-p1	transcript=TGGT1_318230-t26_1 | gene=TGGT1_318230 | organism=Toxoplasma_gondii_GT1 | gene_product=Phosphoglycerate kinase [Source:UniProtKB/TrEMBL;Acc:S7VZ21] | transcript_product=phosphoglycerate kinase PGKI | location=TGGT1_chrIV:1413955-1416908(+) | protein_length=417 | sequence_SO=chromosome | SO=protein_coding_gene | is_pseudo=false	0	28.647	29	11	36	11	417	44.6	6.99	20.72	11	0.912	0.561	0.328	1.855	0.877	0.65045	0.194223	0.0914605	0.334256	0.260431	0.965361	0.673307	0.508896	0.86944	0.636123	8.92	24.61	65.33	36.78	54.45	0.596	0.912	0.97	0.673	0.055	0.561	0.328	0.051	0.587	1.303	1.855	2.315	0.877	0.132
FALSE	High	Master Protein	TGGT1_240520-t26_1-p1	transcript=TGGT1_240520-t26_1 | gene=TGGT1_240520 | organism=Toxoplasma_gondii_GT1 | gene_product=hypothetical protein | transcript_product=hypothetical protein | location=TGGT1_chrVI:1274924-1276276(+) | protein_length=399 | sequence_SO=chromosome | SO=protein_coding_gene | is_pseudo=false	0	8.476	6	2	3	2	399	44.4	8.35	2.37	2	0.131	4.215	0.84	0.01	3.236	1e-17	5.17166e-05	0.835048	1e-17	0.00198451	1.73608e-16	0.000565259	0.974841	1.03865e-16	0.0125832	965.2	1755.64	177.38	0	147.8		0.01	1.715		100	0.178		2.314	0.305	0.01	0.01	100	0.01	3.236
FALSE	Medium	Master Protein	TGGT1_268760-t26_1-p1	transcript=TGGT1_268760-t26_1 | gene=TGGT1_268760 | organism=Toxoplasma_gondii_GT1 | gene_product=hypothetical protein | transcript_product=hypothetical protein | location=TGGT1_chrVIII:6327416-6328769(-) | protein_length=292 | sequence_SO=chromosome | SO=protein_coding_gene | is_pseudo=false	0.045	1.777	3	1	2	1	292	32	7.33	0	1	0.646	0.579	0.425	100	100	0.0103332	0.488408	0.243557	1e-17	1e-17	0.0983814	0.909352	0.830689	1.03865e-16	1.03758e-16	29.88	40.34	13.82	0	0	0.809	0.646	0.534	0.579	0.01	0.796	0.469	0.01	0.425	100	1.586	100	100	0.01
FALSE	Medium	Master Protein	TGGT1_320160B-t26_1-p1	transcript=TGGT1_320160B-t26_1 | gene=TGGT1_320160B | organism=Toxoplasma_gondii_GT1 | gene_product=hypothetical protein | transcript_product=hypothetical protein | location=TGGT1_chrIV:404778-406716(+) | protein_length=378 | sequence_SO=chromosome | SO=protein_coding_gene | is_pseudo=false	0.031	2.056	2	1	2	1	378	41.8	9.77	0	1	1.185	0.871	1.224	1.252	1.09	0.247082	0.749777	0.332239	0.932599	0.886752	0.774337	0.943561	0.877851	0.992622	0.974279	23.63	23.3	19.62	37.57	16.93	1.185	1.592	0.996	1.033	0.871	0.707	1.224	1.386	0.704	0.935	1.252	1.894	0.966	1.09
FALSE	High	Master Protein	TGGT1_202390-t26_1-p1	transcript=TGGT1_202390-t26_1 | gene=TGGT1_202390 | organism=Toxoplasma_gondii_GT1 | gene_product=S15 sporozoite-expressed protein [Source:UniProtKB/TrEMBL;Acc:S7WAF1] | transcript_product=S15 sporozoite-expressed protein | location=TGGT1_chrVIIa:3261261-3263894(-) | protein_length=587 | sequence_SO=chromosome | SO=protein_coding_gene | is_pseudo=false	0	17.551	12	6	24	6	587	61.9	5.01	11.21	6	0.815	0.641	0.56	1.64	0.661	0.253661	0.368616	0.541909	0.524089	0.00625786	0.780654	0.833119	0.926406	0.930964	0.0363168	4.08	37.75	23.73	14.1	25.22	0.793	1.026	0.815	0.86	0.419	0.641	0.667	0.458	0.56	1.186	1.64	1.797	1.022	0.565
FALSE	High	Master Protein	TGGT1_248880-t26_1-p1	transcript=TGGT1_248880-t26_1 | gene=TGGT1_248880 | organism=Toxoplasma_gondii_GT1 | gene_product=GTPase RAB7 [Source:UniProtKB/TrEMBL;Acc:S7V0V9] | transcript_product=GTPase RAB7 | location=TGGT1_chrXII:4169929-4175109(-) | protein_length=432 | sequence_SO=chromosome | SO=protein_coding_gene | is_pseudo=false	0	24.961	16	8	26	8	432	47.8	9.67	26.94	8	0.842	1.156	0.837	1.139	0.941	0.34852	0.378835	0.840452	0.736585	0.470996	0.87471	0.83972	0.975299	0.969165	0.832267	20.76	0.6	21.79	9.76	4	0.721	0.98	0.842	1.16	0.828	1.156	0.837	0.73	1.034	0.971	1.139	1.214	0.941	0.917
FALSE	High	Master Protein	TGGT1_267050-t26_1-p1	transcript=TGGT1_267050-t26_1 | gene=TGGT1_267050 | organism=Toxoplasma_gondii_GT1 | gene_product=Hydrolase_4 domain-containing protein [Source:UniProtKB/TrEMBL;Acc:A0A125YZJ0] | transcript_product=hydrolase, alpha/beta fold family protein | location=TGGT1_chrIX:638270-640900(+) | protein_length=308 | sequence_SO=chromosome | SO=protein_coding_gene | is_pseudo=false	0	6.706	7	3	9	3	308	34	7.02	0	3	1.171	1.01	1.032	1.767	1.601	0.27733	0.385283	0.532428	0.403792	0.0415899	0.808926	0.845455	0.926406	0.904455	0.195074	25.61	33.53	47.1	22.35	5.37	0.912	1.171	1.374	1.239	0.203	1.01	1.032	0.214	1.36	1.5	2.154	1.767	1.659	0.392
FALSE	Medium	Master Protein	TGGT1_261720-t26_1-p1	transcript=TGGT1_261720-t26_1 | gene=TGGT1_261720 | organism=Toxoplasma_gondii_GT1 | gene_product=Metal cation transporter, ZIP family protein [Source:UniProtKB/TrEMBL;Acc:A0A125YGA4] | transcript_product=metal cation transporter, ZIP family protein | location=TGGT1_chrVIIb:1541048-1544147(-) | protein_length=448 | sequence_SO=chromosome | SO=protein_coding_gene | is_pseudo=false	0.018	2.296	2	1	1	1	448	47.4	5.03	1.95	1	1.182	100	100	0.01	0.634	0.254037	1e-17	1e-17	1e-17	0.0512456	0.780654	1.60374e-16	1.34062e-16	1.03865e-16	0.224955	0	0	0	0	9.71			1.182	100	100	1.175	100	100	1.388	0.01	0.01	100	0.634	0.595
FALSE	High	Master Protein	TGGT1_201780-t26_1-p1	transcript=TGGT1_201780-t26_1 | gene=TGGT1_201780 | organism=Toxoplasma_gondii_GT1 | gene_product=VWFA domain-containing protein [Source:UniProtKB/TrEMBL;Acc:A0A125YK19] | transcript_product=microneme protein MIC2 | location=TGGT1_chrVIIa:3693727-3696991(-) | protein_length=769 | sequence_SO=chromosome | SO=protein_coding_gene | is_pseudo=false	0	16.026	12	6	21	6	769	82.6	4.83	9.19	6	0.899	0.941	0.455	0.906	0.831	0.590646	0.587087	0.303911	0.343258	0.1656	0.956627	0.91465	0.873918	0.86944	0.490133	30.02	3.46	7.67	18.6	118.15	0.457	1.127	0.899	0.964	0.383	0.941	0.455	0.433	0.948	0.805	0.906	4.279	0.831	0.333
FALSE	Medium	Master Protein	TGGT1_226720-t26_1-p1	transcript=TGGT1_226720-t26_1 | gene=TGGT1_226720 | organism=Toxoplasma_gondii_GT1 | gene_product=Translin family protein [Source:UniProtKB/TrEMBL;Acc:S7UXF7] | transcript_product=translin family protein | location=TGGT1_chrX:1320212-1321887(+) | protein_length=273 | sequence_SO=chromosome | SO=protein_coding_gene | is_pseudo=false	0.044	1.794	3	1	2	1	273	31.3	6.07	0	1	1.063	0.413	0.44	2.493	0.957	0.622212	0.0908613	0.272093	0.0792824	0.64656	0.965361	0.450528	0.844018	0.42849	0.897666	19.14	75.87	19.22	42.69	41.43	0.597	1.201	1.063	0.847	0.114	0.413	0.505	0.136	0.44	1.13	2.493	3.211	0.957	0.283
FALSE	High	Master Protein	TGGT1_229180-t26_1-p1	transcript=TGGT1_229180-t26_1 | gene=TGGT1_229180 | organism=Toxoplasma_gondii_GT1 | gene_product=Importin N-terminal domain-containing protein [Source:UniProtKB/TrEMBL;Acc:S7V226] | transcript_product=HEAT repeat-containing protein | location=TGGT1_chrVIII:71618-81573(-) | protein_length=1238 | sequence_SO=chromosome | SO=protein_coding_gene | is_pseudo=false	0	49.163	16	16	52	16	1238	136	4.79	53.53	16	0.916	0.703	0.667	1.221	1.031	0.672281	0.535981	0.797594	0.879879	0.83935	0.969375	0.91465	0.972757	0.986633	0.959846	4.35	15.44	18.79	33.76	12.64	0.801	0.916	0.944	1.182	0.703	0.637	1.01	0.667	0.592	0.943	1.221	1.768	1.031	0.849
FALSE	Medium	Master Protein	TGGT1_272390-t26_1-p1	transcript=TGGT1_272390-t26_1 | gene=TGGT1_272390 | organism=Toxoplasma_gondii_GT1 | gene_product=hypothetical protein | transcript_product=hypothetical protein | location=TGGT1_chrVIII:4002798-4008662(-) | protein_length=1258 | sequence_SO=chromosome | SO=protein_coding_gene | is_pseudo=false	0.046	1.771	1	1	1	1	1258	132.2	9.57	0	1	0.577	7.37	5.598	100	100	0.00111367	1.59271e-07	5.37539e-05	1e-17	1e-17	0.0130238	2.05496e-06	0.000576511	1.03865e-16	1.03758e-16	0	1000.32	1319.97	0	0			0.577		100	0.543		100	0.313			100		100
FALSE	High	Master Protein	TGGT1_205470-t26_1-p1	transcript=TGGT1_205470-t26_1 | gene=TGGT1_205470 | organism=Toxoplasma_gondii_GT1 | gene_product=Tr-type G domain-containing protein [Source:UniProtKB/TrEMBL;Acc:A0A125YJ59] | transcript_product=putative translation elongation factor 2 family protein | location=TGGT1_chrVIIa:1297616-1301283(+) | protein_length=832 | sequence_SO=chromosome | SO=protein_coding_gene | is_pseudo=false	0	88.185	30	21	142	21	832	93	6.33	188.52	21	0.915	0.609	0.463	1.374	0.914	0.666473	0.293043	0.319609	0.870655	0.375332	0.969107	0.784244	0.876091	0.986633	0.756834	10.69	49.95	56.25	28	113.96	0.591	0.915	0.986	0.609	0.358	0.919	0.463	0.335	0.934	1.114	1.374	3.805	0.914	0.473
FALSE	Low	Master Protein	TGGT1_291005-t26_1-p1	transcript=TGGT1_291005-t26_1 | gene=TGGT1_291005 | organism=Toxoplasma_gondii_GT1 | gene_product=ISP1_C domain-containing protein [Source:UniProtKB/TrEMBL;Acc:S7W4H0] | transcript_product=hypothetical protein | location=TGGT1_chrIX:3844200-3845170(-) | protein_length=100 | sequence_SO=chromosome | SO=protein_coding_gene | is_pseudo=false	0.058	1.706	20	1	1	1	100	11.1	9.6	0	1
FALSE	High	Master Protein	TGGT1_291680-t26_1-p1	transcript=TGGT1_291680-t26_1 | gene=TGGT1_291680 | organism=Toxoplasma_gondii_GT1 | gene_product=Protein transport protein SEC23 [Source:UniProtKB/TrEMBL;Acc:S7VXH0] | transcript_product=Sec23/Sec24 trunk domain-containing protein | location=TGGT1_chrIX:4131104-4145209(-) | protein_length=791 | sequence_SO=chromosome | SO=protein_coding_gene | is_pseudo=false	0	30.752	17	11	30	11	791	87.5	6.14	22.62	11	0.952	0.871	0.734	1.302	0.983	0.851237	0.773269	0.948392	0.984433	0.627368	0.985103	0.943561	0.993783	0.995636	0.897666	0.07	3.91	1.64	7.01	25.14	0.879	0.952	0.952	0.834	0.871	0.895	0.734	0.875	0.726	1.57	1.24	1.302	1.467	0.841
FALSE	High	Master Protein	TGGT1_264050-t26_1-p1	transcript=TGGT1_264050-t26_1 | gene=TGGT1_264050 | organism=Toxoplasma_gondii_GT1 | gene_product=UBIQUITIN_CONJUGAT_2 domain-containing protein [Source:UniProtKB/TrEMBL;Acc:A0A125YSJ6] | transcript_product=ubiquitin-conjugating enzyme subfamily protein | location=TGGT1_chrVIIb:189077-192724(+) | protein_length=302 | sequence_SO=chromosome | SO=protein_coding_gene | is_pseudo=false	0	68.745	53	13	73	13	302	34.4	5.27	114.92	13	1.061	35.583	90.334	0.027	1.038	0.632913	1e-17	1e-17	1e-17	0.869282	0.965361	1.60374e-16	1.34062e-16	1.03865e-16	0.969518	150.23	40.66	15.86	72.34	1.36	2.585		0.435	35.583	25.825	100	90.334	0.798	100	0.052	0.027	0.01	1.048	0.349
FALSE	High	Master Protein	TGGT1_225990-t26_1-p1	transcript=TGGT1_225990-t26_1 | gene=TGGT1_225990 | organism=Toxoplasma_gondii_GT1 | gene_product=PKS_AT domain-containing protein [Source:UniProtKB/TrEMBL;Acc:S7WCL6] | transcript_product=acyl transferase domain-containing protein | location=TGGT1_chrX:1784216-1787029(+) | protein_length=502 | sequence_SO=chromosome | SO=protein_coding_gene | is_pseudo=false	0	11.781	10	4	15	4	502	53.2	7.93	9.88	4	0.884	0.925	0.98	1.933	1.671	0.521855	0.567559	0.603552	0.28223	0.0345794	0.942037	0.91465	0.93387	0.844306	0.168182	1.78	21.78	37.22	62.67	20.03	0.884	0.874	1.311	1.085	0.925	0.747	0.581	1.308	0.98	100	1.116	1.933	100	1.671
FALSE	High	Master Protein	TGGT1_275860-t26_1-p1	transcript=TGGT1_275860-t26_1 | gene=TGGT1_275860 | organism=Toxoplasma_gondii_GT1 | gene_product=hypothetical protein | transcript_product=hypothetical protein | location=TGGT1_chrIII:168447-170625(+) | protein_length=383 | sequence_SO=chromosome | SO=protein_coding_gene | is_pseudo=false	0	15.146	16	5	5	5	383	43.2	9.09	10.62	5	0.642	0.923	1.255	0.841	0.726	0.00927008	0.596537	0.307826	0.251482	0.119808	0.0912913	0.91465	0.874546	0.806249	0.391434	10.7	85.86	111.55	7.84	85.46	0.642	0.599	1.454	0.01	2.193	0.923	0.01	2.2	1.255	0.888	0.586	0.841	0.01	1.714
FALSE	High	Master Protein	TGGT1_320140-t26_1-p1	transcript=TGGT1_320140-t26_1 | gene=TGGT1_320140 | organism=Toxoplasma_gondii_GT1 | gene_product=Cytochrome b-c1 complex subunit 6 [Source:UniProtKB/TrEMBL;Acc:S7VSS5] | transcript_product=putative ubiquinol-cytochrome c reductase hinge protein | location=TGGT1_chrIV:420205-421699(-) | protein_length=89 | sequence_SO=chromosome | SO=protein_coding_gene | is_pseudo=false	0.005	3.377	18	1	1	1	89	10.5	8.16	0	1	0.521	0.46	0.47	100	6.616	0.000101993	0.202769	0.3361	1e-17	3.32602e-08	0.00136315	0.686294	0.877851	1.03865e-16	2.62403e-07	3.39	74.37	147.56	0	1115.48	0.521	100	0.509	0.01	0.46	0.923	0.01	100	0.47	100	0.951	100		0.438
FALSE	Low	Master Protein	TGGT1_200010-t26_1-p1	transcript=TGGT1_200010-t26_1 | gene=TGGT1_200010 | organism=Toxoplasma_gondii_GT1 | gene_product=hypothetical protein | transcript_product=hypothetical protein | location=TGGT1_chrXII:2184571-2186156(-) | protein_length=413 | sequence_SO=chromosome | SO=protein_coding_gene | is_pseudo=false	0.065	1.658	2	1	1	1	413	45.2	7.84	0	1	0.762	0.807	0.611	1.445	1.128	0.120535	0.911884	0.66345	0.765723	0.952823	0.55786	0.974587	0.941345	0.971965	0.990916	1.04	14.25	15.18	18.64	118.48	0.762	1.019	0.757	0.893	0.157	0.807	0.68	0.16	0.611	1.263	1.445	2.576	1.128	0.227
FALSE	Medium	Master Protein	TGGT1_232600-t26_1-p1	transcript=TGGT1_232600-t26_1 | gene=TGGT1_232600 | organism=Toxoplasma_gondii_GT1 | gene_product=PNPLA domain-containing protein [Source:UniProtKB/TrEMBL;Acc:S7V2V6] | transcript_product=phospholipase, patatin family protein | location=TGGT1_chrVIII:2182196-2184854(+) | protein_length=665 | sequence_SO=chromosome | SO=protein_coding_gene | is_pseudo=false	0.027	2.126	2	1	2	1	665	70.7	4.58	0	1	0.789	0.744	0.587	1.367	0.739	0.180078	0.936963	0.607365	0.881257	0.160661	0.668002	0.979189	0.93387	0.986633	0.478351	0.14	18.67	18.55	40.47	147.16	0.79	0.78	0.789	0.744	0.187	0.851	0.587	0.146	0.671	0.994	1.367	100	0.739	0.256
FALSE	Medium	Master Protein	TGGT1_217570-t26_1-p1	transcript=TGGT1_217570-t26_1 | gene=TGGT1_217570 | organism=Toxoplasma_gondii_GT1 | gene_product=Ribosomal protein RPS27 [Source:UniProtKB/TrEMBL;Acc:S7WHM0] | transcript_product=ribosomal protein RPS27 | location=TGGT1_chrXII:1851792-1853599(+) | protein_length=151 | sequence_SO=chromosome | SO=protein_coding_gene | is_pseudo=false	0.024	2.177	5	1	10	1	151	16.9	9.31	9.82	1	1.167	1.074	0.84	0.876	0.77	0.288301	0.510052	0.833646	0.299788	0.0627533	0.813231	0.911564	0.974841	0.850784	0.261396	15.62	1.15	7.65	33.17	42.01	0.777	1.167	1.29	1.082	0.685	1.074	0.84	0.799	1.385	0.712	0.876	1.129	0.77	0.6
FALSE	High	Master Protein	TGGT1_222000-t26_1-p1	transcript=TGGT1_222000-t26_1 | gene=TGGT1_222000 | organism=Toxoplasma_gondii_GT1 | gene_product=Brix domain-containing protein [Source:UniProtKB/TrEMBL;Acc:S7UL49] | transcript_product=brix domain-containing protein | location=TGGT1_chrII:726106-731963(-) | protein_length=508 | sequence_SO=chromosome | SO=protein_coding_gene | is_pseudo=false	0	7.146	6	2	7	2	508	57.4	6.71	2.77	2	0.723	1.767	1.253	0.67	1.027	0.060306	0.0188765	0.309805	0.0791487	0.942805	0.352833	0.136676	0.874546	0.42849	0.98781	17.67	14.49	1.15	22.62	39.32	1.822	0.723	0.646	1.127	1.767	1.94	1.262	0.634	1.253	0.817	0.581	0.67	0.566	1.027
FALSE	High	Master Protein	TGGT1_242290-t26_1-p1	transcript=TGGT1_242290-t26_1 | gene=TGGT1_242290 | organism=Toxoplasma_gondii_GT1 | gene_product=Proteasome endopeptidase complex [Source:UniProtKB/TrEMBL;Acc:A0A125YL90] | transcript_product=putative proteasome subunit alpha1 | location=TGGT1_chrVI:1851868-1857165(+) | protein_length=253 | sequence_SO=chromosome | SO=protein_coding_gene | is_pseudo=false	0.001	5.053	8	2	7	2	253	28.1	6.62	7.26	2	0.847	0.834	0.667	1.435	1.092	0.365019	0.760496	0.79816	0.779184	0.832178	0.885121	0.943561	0.972757	0.971965	0.958229	8.69	7.42	15.22	19.85	96.6	0.847	1.074	0.8	0.878	0.265	0.834	0.744	0.285	0.667	1.243	1.435	4.72	1.092	0.38
FALSE	High	Master Protein	TGGT1_254440-t26_1-p1	transcript=TGGT1_254440-t26_1 | gene=TGGT1_254440 | organism=Toxoplasma_gondii_GT1 | gene_product=Ribosomal protein RPL12 [Source:UniProtKB/TrEMBL;Acc:A0A125YT48] | transcript_product=ribosomal protein RPL12 | location=TGGT1_chrIII:1720222-1723221(-) | protein_length=165 | sequence_SO=chromosome | SO=protein_coding_gene | is_pseudo=false	0	7.178	16	2	15	2	165	17.8	9.42	11.12	2	0.866	0.914	0.589	1.316	1.203	0.441012	0.602298	0.612154	0.960668	0.551522	0.923296	0.91465	0.93387	0.995636	0.86452	28.61	25.78	57.03	2.28	118.92	0.645	1.073	0.866	0.914	0.184	1.106	0.589	0.197	0.958	1.316	1.296	100	1.203	0.238
FALSE	High	Master Protein	TGGT1_411760-t26_1-p1	transcript=TGGT1_411760-t26_1 | gene=TGGT1_411760 | organism=Toxoplasma_gondii_GT1 | gene_product=Actin [Source:UniProtKB/TrEMBL;Acc:S7VNC9] | transcript_product=actin | location=AAQM03000536:57-991(+) | protein_length=287 | sequence_SO=contig | SO=protein_coding_gene | is_pseudo=false	0	44.661	33	9	77	8	287	32	6.04	66.09	9	0.759	1.222	0.98	0.759	1.016	0.114666	0.29432	0.602636	0.155308	0.774972	0.542617	0.784244	0.93387	0.646036	0.942756	5.61	8.16	33.49	9.32	21.35	0.759	0.789	0.661	1.155	1.901	1.222	0.98	1.743	0.8	0.714	0.918	0.759	0.87	1.565
FALSE	High	Master Protein	TGGT1_226990-t26_1-p1	transcript=TGGT1_226990-t26_1 | gene=TGGT1_226990 | organism=Toxoplasma_gondii_GT1 | gene_product=hypothetical protein | transcript_product=hypothetical protein | location=TGGT1_chrX:1068028-1070058(-) | protein_length=676 | sequence_SO=chromosome | SO=protein_coding_gene | is_pseudo=false	0	47.527	32	15	58	15	676	71.6	10.08	41.48	15	1.044	0.98	1.019	0.859	1.076	0.7023	0.702837	0.548998	0.275296	0.971117	0.973495	0.933509	0.926406	0.843531	0.99592	16.73	41.85	21.86	5.07	18.4	1.213	0.927	1.044	0.764	0.98	1.474	1.019	0.869	1.373	1.327	0.859	0.83	1.076	0.753
FALSE	High	Master Protein	TGGT1_254900-t26_1-p1	transcript=TGGT1_254900-t26_1 | gene=TGGT1_254900 | organism=Toxoplasma_gondii_GT1 | gene_product=Proteasome subunit beta [Source:UniProtKB/TrEMBL;Acc:A0A125YJ26] | transcript_product=putative proteasome subunit beta type 2 | location=TGGT1_chrIII:1997522-1998441(+) | protein_length=191 | sequence_SO=chromosome | SO=protein_coding_gene | is_pseudo=false	0.001	4.511	9	2	3	2	191	22	7.88	1.92	2	1.043	0.74	0.605	1.704	0.924	0.708767	0.977176	0.650605	0.460634	0.558034	0.973495	0.995745	0.941345	0.915333	0.86452	2.95	12.76	41.53	15.14	7.8	0.639	1.043	1.064	0.74	0.491	0.809	0.473	0.605	0.861	1.25	1.704	1.878	0.924	0.878
FALSE	High	Master Protein	TGGT1_214840-t26_1-p1	transcript=TGGT1_214840-t26_1 | gene=TGGT1_214840 | organism=Toxoplasma_gondii_GT1 | gene_product=AP2 domain transcription factor AP2X-7 [Source:UniProtKB/TrEMBL;Acc:S7UQH1] | transcript_product=AP2 domain transcription factor AP2X-7 | location=TGGT1_chrX:6426532-6432141(+) | protein_length=1869 | sequence_SO=chromosome | SO=protein_coding_gene | is_pseudo=false	0	14.627	6	8	12	8	1869	183.9	5.15	0	8	1.24	0.303	0.435	2.272	0.807	0.150868	0.00601026	0.263604	0.132012	0.12275	0.613677	0.0526204	0.83956	0.607328	0.399521	16.71	3.78	35.39	74.44	8.7	1.24	1.54	1.1	0.303	0.296	0.469	0.337	0.435	0.572	2.272	3.942	1.131	0.807	0.857
FALSE	High	Master Protein	TGGT1_311110-t26_1-p1	transcript=TGGT1_311110-t26_1 | gene=TGGT1_311110 | organism=Toxoplasma_gondii_GT1 | gene_product=Putative Ubiquitin-fold modifier 1 family protein [Source:UniProtKB/TrEMBL;Acc:A0A125YFZ1] | transcript_product=putative Ubiquitin-fold modifier 1 precursor family protein | location=TGGT1_chrXI:1777787-1778994(+) | protein_length=91 | sequence_SO=chromosome | SO=protein_coding_gene | is_pseudo=false	0.001	4.608	16	2	6	2	91	9.5	8.91	1.68	2	1.122	0.945	1.06	1.271	1.256	0.412027	0.477008	0.497945	0.964206	0.401917	0.91043	0.90447	0.926268	0.995636	0.779776	13.5	30.31	14.59	24.88	66.7	0.98	1.224	1.122	1.187	0.544	0.945	1.164	0.665	1.06	1.057	1.271	2.002	1.256	0.691
FALSE	Medium	Master Protein	TGGT1_244390-t26_1-p1	transcript=TGGT1_244390-t26_1 | gene=TGGT1_244390 | organism=Toxoplasma_gondii_GT1 | gene_product=Coatomer epsilon subunit protein [Source:UniProtKB/TrEMBL;Acc:S7VTV8] | transcript_product=coatomer epsilon subunit protein | location=TGGT1_chrVI:3145659-3150988(-) | protein_length=309 | sequence_SO=chromosome | SO=protein_coding_gene | is_pseudo=false	0.033	1.995	4	1	1	1	309	33.9	5.14	0	1	0.689	0.01	0.01	100	0.663	0.030177	1e-17	1e-17	1e-17	0.108912	0.223868	1.60374e-16	1.34062e-16	1.03865e-16	0.370692	64.96	0	0	0	0	0.451		1.055	0.01	100	0.01	0.01	100	0.01	100	0.01	100		0.663
FALSE	High	Master Protein	TGGT1_238070-t26_1-p1	transcript=TGGT1_238070-t26_1 | gene=TGGT1_238070 | organism=Toxoplasma_gondii_GT1 | gene_product=Glutaredoxin domain-containing protein [Source:UniProtKB/TrEMBL;Acc:A0A125YM82] | transcript_product=glutaredoxin domain-containing protein | location=TGGT1_chrVI:45953-48446(+) | protein_length=238 | sequence_SO=chromosome | SO=protein_coding_gene | is_pseudo=false	0.001	4.789	11	2	6	2	238	26.1	5.63	0	2	0.923	0.589	0.519	2.134	1.101	0.708132	0.442774	0.446044	0.180271	0.942163	0.973495	0.88144	0.909805	0.693635	0.987743	50.23	5.86	6.58	23.45	146.91	0.631	1.396	0.923	0.613	0.01	0.589	0.519	0.01	0.543	1.797	2.134	100	1.101	0.01
FALSE	High	Master Protein	TGGT1_284050-t26_1-p1	transcript=TGGT1_284050-t26_1 | gene=TGGT1_284050 | organism=Toxoplasma_gondii_GT1 | gene_product=DEAD/DEAH box helicase domain-containing protein [Source:UniProtKB/TrEMBL;Acc:S7UNJ3] | transcript_product=DEAD/DEAH box helicase domain-containing protein | location=TGGT1_chrV:2643913-2665787(+) | protein_length=2545 | sequence_SO=chromosome | SO=protein_coding_gene | is_pseudo=false	0	13.861	2	5	11	5	2545	280.7	8.32	3.65	5	0.988	1.017	0.88	1.063	1.424	0.966734	0.372379	0.762021	0.601297	0.143256	0.991462	0.833119	0.972757	0.942063	0.44278	7.69	9.29	7.41	18.67	2.2	0.939	1.199	0.988	1.081	1.017	0.663	1.031	0.88	0.838	0.929	1.063	2.058	1.424	1.03
FALSE	High	Master Protein	TGGT1_262730-t26_1-p1	transcript=TGGT1_262730-t26_1 | gene=TGGT1_262730 | organism=Toxoplasma_gondii_GT1 | gene_product=Protein kinase domain-containing protein [Source:UniProtKB/TrEMBL;Acc:S7UXU9] | transcript_product=rhoptry protein ROP16 | location=TGGT1_chrVIIb:1028456-1030579(-) | protein_length=707 | sequence_SO=chromosome | SO=protein_coding_gene | is_pseudo=false	0	79.762	46	20	67	20	707	76.1	9.07	71.3	20	1.099	0.818	0.901	1.182	0.969	0.488033	0.872295	0.725188	0.811742	0.578318	0.941301	0.971047	0.969176	0.980849	0.873963	4.93	13.15	10.15	11.54	2.04	1.099	1.031	1.135	0.818	0.935	0.752	0.798	0.901	0.968	1.274	1.019	1.182	1.157	0.969
FALSE	High	Master Protein	TGGT1_285870-t26_1-p1	transcript=TGGT1_285870-t26_1 | gene=TGGT1_285870 | organism=Toxoplasma_gondii_GT1 | gene_product=SAG domain-containing protein [Source:UniProtKB/TrEMBL;Acc:S7UNS7] | transcript_product=SAG-related sequence SRS20A | location=TGGT1_chrV:2015649-2017548(-) | protein_length=328 | sequence_SO=chromosome | SO=protein_coding_gene | is_pseudo=false	0	8.879	22	4	7	4	328	34.9	7.77	0	4	0.73	0.44	0.39	1.049	0.462	0.0691604	0.161769	0.179385	0.578328	0.00194627	0.379368	0.619635	0.727718	0.940113	0.0123866	18.16	43.35	53.58	6.2	51.71	0.65	1.144	0.73	0.44	0.34	1.53	0.286	0.39	1.117	1.049	1.006	100	0.462	0.342
FALSE	High	Master Protein	TGGT1_237180-t26_1-p1	transcript=TGGT1_237180-t26_1 | gene=TGGT1_237180 | organism=Toxoplasma_gondii_GT1 | gene_product=hypothetical protein | transcript_product=hypothetical protein | location=TGGT1_chrX:5659103-5659870(-) | protein_length=255 | sequence_SO=chromosome | SO=protein_coding_gene | is_pseudo=false	0	16.723	23	6	17	6	255	29.2	8.97	4.38	6	0.992	0.854	0.726	1.312	0.956	0.945097	0.783234	0.93116	0.968192	0.531078	0.987619	0.943561	0.991164	0.995636	0.86452	31.2	30.92	13.61	1.47	45.63	0.992	1.257	0.78	0.854	0.518	1.079	0.665	0.726	0.813	1.299	1.645	1.312	0.956	0.724
FALSE	High	Master Protein	TGGT1_270880-t26_1-p1	transcript=TGGT1_270880-t26_1 | gene=TGGT1_270880 | organism=Toxoplasma_gondii_GT1 | gene_product=RRM domain-containing protein [Source:UniProtKB/TrEMBL;Acc:S7V429] | transcript_product=RNA recognition motif-containing protein | location=TGGT1_chrVIII:4904990-4913024(-) | protein_length=1374 | sequence_SO=chromosome | SO=protein_coding_gene | is_pseudo=false	0	12.729	7	4	13	4	1374	138.9	6.09	3.96	4	0.983	0.746	1.009	1.393	1.203	0.99019	0.941199	0.562454	0.841678	0.558861	0.998575	0.983017	0.926406	0.984724	0.86452	17.75	81.9	51.9	71.64	51.72	0.983	0.878	1.364	0.746	2.27	0.481	1.009	1.708	0.656	1.393	0.72	2.501	1.203	1.871
FALSE	High	Master Protein	TGGT1_244200-t26_1-p1	transcript=TGGT1_244200-t26_1 | gene=TGGT1_244200 | organism=Toxoplasma_gondii_GT1 | gene_product=Transket_pyr domain-containing protein [Source:UniProtKB/TrEMBL;Acc:S7UEM2] | transcript_product=putative 2-oxoglutarate dehydrogenase e1 component, mitochondrial precursor | location=TGGT1_chrVI:3022117-3029688(-) | protein_length=1116 | sequence_SO=chromosome | SO=protein_coding_gene | is_pseudo=fa…	0	33.823	15	10	21	10	1116	124.2	7.11	19.91	10	0.921	0.75	0.778	1.157	1.542	0.697828	0.99448	0.956349	0.768345	0.0580195	0.973495	0.999207	0.994815	0.971965	0.248946	2.31	15.96	67.1	18.43	44.14	0.461	0.921	0.936	0.75	1.557	0.677	0.536	1.679	0.778	1.013	1.157	2.256	0.837	2.002
FALSE	High	Master Protein	TGGT1_285500-t26_1-p1	transcript=TGGT1_285500-t26_1 | gene=TGGT1_285500 | organism=Toxoplasma_gondii_GT1 | gene_product=hypothetical protein | transcript_product=hypothetical protein | location=TGGT1_chrV:2225125-2233785(+) | protein_length=1899 | sequence_SO=chromosome | SO=protein_coding_gene | is_pseudo=false	0	7.52	2	3	4	3	1899	206.3	7.18	1.74	3	1.278	0.01	0.01	4.49	0.01	0.105067	1e-17	1e-17	0.000882956	1e-17	0.515841	1.60374e-16	1.34062e-16	0.00695277	1.03758e-16	0.7	0	0	133.8	0	1.807	1.272	1.278	0.432	0.01	0.01	0.756	0.01	0.01	4.49	100	0.438
FALSE	High	Master Protein	TGGT1_251480-t26_1-p1	transcript=TGGT1_251480-t26_1 | gene=TGGT1_251480 | organism=Toxoplasma_gondii_GT1 | gene_product=RNA helicase [Source:UniProtKB/TrEMBL;Acc:S7W8Q0] | transcript_product=DEAD/DEAH box helicase domain-containing protein | location=TGGT1_chrXII:5338278-5344957(-) | protein_length=1102 | sequence_SO=chromosome | SO=protein_coding_gene | is_pseudo=false	0	19.84	9	8	13	8	1102	121.5	7.93	9.71	8	1.093	0.978	1.007	0.967	0.945	0.509391	0.478192	0.564958	0.439236	0.512527	0.942037	0.905715	0.926406	0.915333	0.852342	13.02	30.87	18.14	15.47	3.49	0.997	1.204	1.093	1.414	0.978	0.809	1.13	1.007	0.716	0.564	0.967	1.08	0.972	0.945
FALSE	High	Master Protein	TGGT1_297070-t26_1-p1	transcript=TGGT1_297070-t26_1 | gene=TGGT1_297070 | organism=Toxoplasma_gondii_GT1 | gene_product=Alpha-carbonic anhydrase domain-containing protein [Source:UniProtKB/TrEMBL;Acc:A0A125YMC5] | transcript_product=hypothetical protein | location=TGGT1_chrII:1492810-1494671(-) | protein_length=519 | sequence_SO=chromosome | SO=protein_coding_gene | is_pseudo=false	0	9.703	10	4	13	4	519	58.1	6.33	3.63	4	0.784	0.954	0.26	1.325	0.769	0.167302	0.458507	0.0306968	0.946639	0.138702	0.64031	0.8874	0.227794	0.995636	0.434904	31.26	0.24	96.61	53.95	147.12	0.263	0.993	0.784	0.956	0.101	0.954	0.26	0.1	0.745	0.843	1.325	100	0.769	0.198
FALSE	High	Master Protein	TGGT1_249180-t26_1-p1	transcript=TGGT1_249180-t26_1 | gene=TGGT1_249180 | organism=Toxoplasma_gondii_GT1 | gene_product=Bifunctional dihydrofolate reductase-thymidylate synthase [Source:UniProtKB/TrEMBL;Acc:A0A125YXY2] | transcript_product=bifunctional dihydrofolate reductase-thymidylate synthase | location=TGGT1_chrXII:4294324-4300363(-) | protein_length=610 | sequence_SO=chromosome | SO=protein_coding_gene | is_pseu…	0	48.313	34	15	32	15	610	68.7	7.24	31.36	15	0.882	3.826	3.158	0.308	0.783	0.510929	7.07822e-06	0.00394279	0.000126903	0.0770819	0.942037	8.15182e-05	0.0356096	0.00102798	0.301288	15.06	9.13	30.68	59.56	18.01	0.692	0.981	0.882	4.061	1.984	3.826	3.158	1.702	3.811	0.219	0.308	0.755	0.783	0.698
FALSE	High	Master Protein	TGGT1_226410-t26_1-p1	transcript=TGGT1_226410-t26_1 | gene=TGGT1_226410 | organism=Toxoplasma_gondii_GT1 | gene_product=EF1_GNE domain-containing protein [Source:UniProtKB/TrEMBL;Acc:S7UX25] | transcript_product=EF-1 guanine nucleotide exchange domain-containing protein | location=TGGT1_chrX:1563878-1565889(-) | protein_length=328 | sequence_SO=chromosome | SO=protein_coding_gene | is_pseudo=false	0	25.808	30	8	44	8	328	36	5.16	64.87	8	0.96	0.698	0.476	1.705	0.882	0.891656	0.521236	0.347538	0.459413	0.274544	0.985103	0.91465	0.890324	0.915333	0.645854	20.26	13.52	6.96	34.31	47.16	0.672	1.112	0.96	0.698	0.328	0.768	0.499	0.374	0.476	1.31	1.705	4.792	0.882	0.669
FALSE	High	Master Protein	TGGT1_216260-t26_1-p1	transcript=TGGT1_216260-t26_1 | gene=TGGT1_216260 | organism=Toxoplasma_gondii_GT1 | gene_product=NTP_transf_3 domain-containing protein [Source:UniProtKB/TrEMBL;Acc:S7W0K0] | transcript_product=putative eukaryotic initiation factor-2B, gamma subunit | location=TGGT1_chrXI:6191789-6198714(+) | protein_length=525 | sequence_SO=chromosome | SO=protein_coding_gene | is_pseudo=false	0	39.913	27	13	47	13	525	58	6.74	50.98	13	0.873	0.782	0.766	1.315	1.182	0.472039	0.765276	0.982588	0.962239	0.56695	0.939797	0.943561	0.995031	0.995636	0.86872	1.69	23.23	26.11	6.9	6.2	0.873	0.863	1.31	0.965	0.782	0.676	0.929	0.621	0.766	1.377	1.135	1.315	1.232	0.856
FALSE	High	Master Protein	TGGT1_255190-t26_1-p1	transcript=TGGT1_255190-t26_1 | gene=TGGT1_255190 | organism=Toxoplasma_gondii_GT1 | gene_product=Myosin motor domain-containing protein [Source:UniProtKB/TrEMBL;Acc:S7WI35] | transcript_product=myosin C | location=TGGT1_chrVIIb:4925758-4933694(+) | protein_length=1171 | sequence_SO=chromosome | SO=protein_coding_gene | is_pseudo=false	0	45.208	17	16	48	16	1171	132.6	7.91	27.1	16	1.063	1.061	1.002	1.158	1.133	0.626097	0.534001	0.571596	0.770029	0.740488	0.965361	0.91465	0.926406	0.971965	0.93417	6.3	4.05	31.43	11.31	18.56	0.897	1.108	1.063	1.09	1.061	0.556	1.002	1.215	0.619	1.07	1.158	1.732	1.133	1.275
FALSE	High	Master Protein	TGGT1_311230-t26_1-p1	transcript=TGGT1_311230-t26_1 | gene=TGGT1_311230 | organism=Toxoplasma_gondii_GT1 | gene_product=hypothetical protein | transcript_product=hypothetical protein | location=TGGT1_chrXI:1844321-1862670(+) | protein_length=4603 | sequence_SO=chromosome | SO=protein_coding_gene | is_pseudo=false	0	629.46	35	136	754	136	4603	494.5	4.88	1089.3	136	1.096	0.814	1.165	1.298	1.373	0.498317	0.859758	0.384555	0.989835	0.15419	0.942037	0.964908	0.898096	0.995636	0.465563	21.06	3.74	30.18	27.89	5.15	1.417	0.94	1.096	0.794	1.553	0.814	1.165	1.402	0.899	1.543	0.919	1.298	1.373	1.421
FALSE	High	Master Protein	TGGT1_283850-t26_1-p1	transcript=TGGT1_283850-t26_1 | gene=TGGT1_283850 | organism=Toxoplasma_gondii_GT1 | gene_product=Peptidylprolyl isomerase [Source:UniProtKB/TrEMBL;Acc:S7UMS7] | transcript_product=peptidyl-prolyl cis-trans isomerase | location=TGGT1_chrV:2748825-2756049(-) | protein_length=503 | sequence_SO=chromosome | SO=protein_coding_gene | is_pseudo=false	0	46.021	35	16	58	15	503	55.5	5.59	46.82	16	1.156	0.587	0.465	3.043	1.162	0.315449	0.244589	0.324041	0.0221835	0.633132	0.8432	0.738772	0.877851	0.144357	0.897666	16.37	16.33	33.03	40.07	99.95	1.156	1.359	1.028	0.66	0.139	0.587	0.598	0.202	0.465	1.879	3.043	3.866	1.162	0.379
FALSE	High	Master Protein	TGGT1_311100-t26_1-p1	transcript=TGGT1_311100-t26_1 | gene=TGGT1_311100 | organism=Toxoplasma_gondii_GT1 | gene_product=Zinc finger (CCCH type) motif-containing protein [Source:UniProtKB/TrEMBL;Acc:S7UU40] | transcript_product=zinc finger (CCCH type) motif-containing protein | location=TGGT1_chrXI:1771325-1774934(+) | protein_length=919 | sequence_SO=chromosome | SO=protein_coding_gene | is_pseudo=false	0	6.083	3	2	2	2	919	98.7	8.6	1.68	2	1.816	0.68	0.699	100	100	0.00015812	0.755447	0.870307	1e-17	1e-17	0.00206414	0.943561	0.981008	1.03865e-16	1.03758e-16	99.42	34.08	106.19	0	0	1.816	100	0.598	0.385	0.883	0.68	0.699	100	0.407	100	3.037	100	100	2.683
FALSE	High	Master Protein	TGGT1_216700-t26_1-p1	transcript=TGGT1_216700-t26_1 | gene=TGGT1_216700 | organism=Toxoplasma_gondii_GT1 | gene_product=Peptide deformylase [Source:UniProtKB/TrEMBL;Acc:S7ULY4] | transcript_product=hypothetical protein | location=TGGT1_chrXI:5873527-5875667(-) | protein_length=440 | sequence_SO=chromosome | SO=protein_coding_gene | is_pseudo=false	0	7.174	6	2	2	2	440	48.5	9.41	2.58	2	0.884	1.213	1.072	1.288	1.7	0.519875	0.261386	0.482861	0.993175	0.165087	0.942037	0.761525	0.925107	0.996117	0.489824	5.03	3.34	34.37	59.96	11.95	0.884	0.855	1.265	1.213	2.131	1.186	1.072	1.821	0.824	1.288	0.767	100	1.563	1.7
FALSE	High	Master Protein	TGGT1_257530-t26_1-p1	transcript=TGGT1_257530-t26_1 | gene=TGGT1_257530 | organism=Toxoplasma_gondii_GT1 | gene_product=Transporter, major facilitator family protein [Source:UniProtKB/TrEMBL;Acc:S7W7U8] | transcript_product=transporter, major facilitator family protein | location=TGGT1_chrVIIb:3924727-3926365(-) | protein_length=504 | sequence_SO=chromosome | SO=protein_coding_gene | is_pseudo=false	0	13.654	14	4	19	4	504	54.5	6.71	8.51	4	0.897	0.879	0.84	1.004	0.819	0.582193	0.95765	0.834626	0.500156	0.130626	0.956627	0.988171	0.974841	0.915333	0.418785	8.44	10.03	38.66	11.14	9.24	0.951	0.897	0.779	0.942	0.591	0.879	1.136	0.582	0.84	0.765	1.004	1.079	0.819	0.574
FALSE	High	Master Protein	TGGT1_267750-t26_1-p1	transcript=TGGT1_267750-t26_1 | gene=TGGT1_267750 | organism=Toxoplasma_gondii_GT1 | gene_product=hypothetical protein | transcript_product=hypothetical protein | location=TGGT1_chrIX:218329-226396(+) | protein_length=1643 | sequence_SO=chromosome | SO=protein_coding_gene | is_pseudo=false	0	7.185	2	3	3	3	1643	175.2	8.22	1.87	3	1.02	0.829	0.757	1.132	0.738	0.811018	0.857239	0.99818	0.723738	0.16291	0.985103	0.964016	0.999983	0.96852	0.484204	14.08	28.12	12.35	30.59	21.94	1.117	1.02	0.91	0.829	0.54	1.022	0.926	0.698	0.757	0.776	1.366	1.132	0.643	0.738
FALSE	High	Master Protein	TGGT1_216560-t26_1-p1	transcript=TGGT1_216560-t26_1 | gene=TGGT1_216560 | organism=Toxoplasma_gondii_GT1 | gene_product=Ribosomal RNA-processing protein 8 [Source:UniProtKB/TrEMBL;Acc:S7ULR7] | transcript_product=methyltransferase domain-containing protein | location=TGGT1_chrXI:6001736-6005776(-) | protein_length=532 | sequence_SO=chromosome | SO=protein_coding_gene | is_pseudo=false	0	33.531	25	10	34	10	532	58.5	10.04	16.96	10	1.216	1.171	1.257	0.938	1.057	0.188462	0.273452	0.306078	0.392773	0.964312	0.683987	0.774568	0.873918	0.902143	0.99392	8.38	8.28	29.91	17.11	15.9	1.285	1.216	1.079	1.171	1.236	0.945	1.55	1.257	1.004	0.785	0.938	1.061	0.921	1.171
FALSE	High	Master Protein	TGGT1_231640-t26_1-p1	transcript=TGGT1_231640-t26_1 | gene=TGGT1_231640 | organism=Toxoplasma_gondii_GT1 | gene_product=Alveolin domain containing intermediate filament IMC1 [Source:UniProtKB/TrEMBL;Acc:A0A125YFV6] | transcript_product=alveolin domain containing intermediate filament IMC1 | location=TGGT1_chrVIII:1511977-1514752(+) | protein_length=609 | sequence_SO=chromosome | SO=protein_coding_gene | is_pseudo=false	0	387.411	62	48	1063	48	609	69.6	5.19	2207.08	48	1.057	1.232	1.142	0.896	1.147	0.649819	0.283477	0.407531	0.32779	0.686854	0.965361	0.777593	0.901174	0.86944	0.915805	10.53	3.29	8.79	37.12	6.62	1.254	0.982	1.057	0.729	1.232	1.259	1.074	1.142	1.375	1.482	0.896	0.716	1.199	1.147
FALSE	High	Master Protein	TGGT1_297180-t26_1-p1	transcript=TGGT1_297180-t26_1 | gene=TGGT1_297180 | organism=Toxoplasma_gondii_GT1 | gene_product=hypothetical protein | transcript_product=hypothetical protein | location=TGGT1_chrII:1568655-1575825(-) | protein_length=871 | sequence_SO=chromosome | SO=protein_coding_gene | is_pseudo=false	0	69.019	28	20	105	20	871	97.6	7.71	89.22	20	1.04	1.175	1.344	1.057	1.081	0.721103	0.352859	0.246962	0.591467	0.94988	0.973495	0.833119	0.830689	0.942063	0.990916	9.27	35.34	6.71	31.03	1.19	1.243	0.975	1.04	0.853	1.455	1.175	1.098	1.405	1.344	1.543	0.836	1.057	1.304	1.072
FALSE	High	Master Protein	TGGT1_260240-t26_1-p1	transcript=TGGT1_260240-t26_1 | gene=TGGT1_260240 | organism=Toxoplasma_gondii_GT1 | gene_product=Ccr4-associated factor family protein [Source:UniProtKB/TrEMBL;Acc:S7UY95] | transcript_product=ccr4-associated factor family protein | location=TGGT1_chrVIIb:2404604-2407464(+) | protein_length=617 | sequence_SO=chromosome | SO=protein_coding_gene | is_pseudo=false	0.001	4.752	3	2	11	2	617	64.2	6.01	4.38	2	1.034	0.982	1.129	0.997	0.942	0.750287	0.412921	0.420697	0.488985	0.609069	0.973495	0.865097	0.904295	0.915333	0.891982	5.93	44.53	49.79	19.61	24.55	1.034	0.992	1.149	1.508	0.755	0.982	1.559	0.75	1.129	0.594	0.997	1.149	0.942	0.753
FALSE	High	Master Protein	TGGT1_290920-t26_1-p1	transcript=TGGT1_290920-t26_1 | gene=TGGT1_290920 | organism=Toxoplasma_gondii_GT1 | gene_product=Fe2OG dioxygenase domain-containing protein [Source:UniProtKB/TrEMBL;Acc:S7UPA3] | transcript_product=oxidoreductase, 2OG-Fe(II) oxygenase family protein | location=TGGT1_chrIX:3746594-3750759(+) | protein_length=967 | sequence_SO=chromosome | SO=protein_coding_gene | is_pseudo=false	0	44.808	26	15	30	15	967	100.8	9.41	24.43	15	0.967	0.737	0.746	1.738	1.481	0.928169	0.805122	0.975835	0.428509	0.0709433	0.985103	0.949222	0.995022	0.914823	0.283773	20.05	17.32	26.68	4.56	11.37	0.967	0.852	1.123	0.737	1.236	0.66	0.746	0.956	0.632	1.792	1.097	1.738	1.481	1.595
FALSE	High	Master Protein	TGGT1_226590-t26_1-p1	transcript=TGGT1_226590-t26_1 | gene=TGGT1_226590 | organism=Toxoplasma_gondii_GT1 | gene_product=COX2_CUA domain-containing protein [Source:UniProtKB/TrEMBL;Acc:A0A125YNU6] | transcript_product=putative cytochrome C oxidase subunit IIa | location=TGGT1_chrX:1425019-1427425(+) | protein_length=299 | sequence_SO=chromosome | SO=protein_coding_gene | is_pseudo=false	0.009	2.688	4	1	1	1	299	34.5	8.22	0	1	0.8	100	100	100	100	0.209606	1e-17	1e-17	1e-17	1e-17	0.723064	1.60374e-16	1.34062e-16	1.03865e-16	1.03758e-16	0	0	0	0	0			0.8	100	100	0.01	100	100	0.01			100	100	100
FALSE	Medium	Master Protein	TGGT1_285250-t26_1-p1	transcript=TGGT1_285250-t26_1 | gene=TGGT1_285250 | organism=Toxoplasma_gondii_GT1 | gene_product=hypothetical protein | transcript_product=hypothetical protein | location=TGGT1_chrV:2339893-2344641(+) | protein_length=1151 | sequence_SO=chromosome | SO=protein_coding_gene | is_pseudo=false	0.018	2.312	1	1	2	1	1151	121.1	5.05	1.78	1	1.263	0.386	0.445	2.381	1.266	0.121683	0.070548	0.282234	0.102836	0.67311	0.55786	0.380693	0.851165	0.507584	0.908805	13.13	47.27	65.48	9.25	51.97	1.263	1.467	1.151	0.244	0.567	0.386	0.308	0.832	0.445	2.381	2.232	4.425	0.581	1.266
FALSE	High	Master Protein	TGGT1_248320-t26_1-p1	transcript=TGGT1_248320-t26_1 | gene=TGGT1_248320 | organism=Toxoplasma_gondii_GT1 | gene_product=Carrier superfamily protein [Source:UniProtKB/TrEMBL;Acc:S7WGM8] | transcript_product=carrier superfamily protein | location=TGGT1_chrXII:3739568-3740644(-) | protein_length=358 | sequence_SO=chromosome | SO=protein_coding_gene | is_pseudo=false	0	14.577	21	5	9	5	358	38.9	9.55	2.72	5	0.932	0.904	0.932	0.868	1.072	0.751611	0.591518	0.675997	0.28792	0.908454	0.973613	0.91465	0.945617	0.845234	0.978711	6.19	13.79	15.73	20.39	19.06	1.187	0.895	0.932	0.827	1.3	0.904	0.932	1.163	0.842	0.868	0.763	1.509	0.789	1.072
FALSE	High	Master Protein	TGGT1_252880B-t26_1-p1	transcript=TGGT1_252880B-t26_1 | gene=TGGT1_252880B | organism=Toxoplasma_gondii_GT1 | gene_product=hypothetical protein | transcript_product=hypothetical protein | location=TGGT1_chrIII:630384-633731(-) | protein_length=1115 | sequence_SO=chromosome | SO=protein_coding_gene | is_pseudo=false	0	59.305	24	20	54	16	1115	122.8	5.1	44.36	20	1.002	1.01	1.201	1.152	1.141	0.898429	0.635638	0.351716	0.758918	0.709301	0.985103	0.922804	0.89377	0.971965	0.92515	1.54	9.86	16.27	0.15	10.64	0.911	1.012	1.002	1.01	1.456	0.943	1.201	1.333	0.924	1.152	0.791	1.153	0.958	1.141
FALSE	High	Master Protein	TGGT1_309590-t26_1-p1	transcript=TGGT1_309590-t26_1 | gene=TGGT1_309590 | organism=Toxoplasma_gondii_GT1 | gene_product=Rhoptry protein ROP1 [Source:UniProtKB/TrEMBL;Acc:S7W7R3] | transcript_product=rhoptry protein ROP1 | location=TGGT1_chrXI:707942-709312(+) | protein_length=456 | sequence_SO=chromosome | SO=protein_coding_gene | is_pseudo=false	0	68.837	26	11	204	11	456	49.5	5.22	368.77	11	1.104	0.64	0.743	1.619	0.891	0.470488	0.366093	0.969162	0.546802	0.302015	0.938747	0.833119	0.994815	0.934143	0.679436	10.22	35.18	1.48	26.01	77.89	1.104	1.18	0.719	0.64	0.105	0.839	0.743	0.115	0.751	1.335	1.619	2.209	0.891	0.226
FALSE	High	Master Protein	TGGT1_233350-t26_1-p1	transcript=TGGT1_233350-t26_1 | gene=TGGT1_233350 | organism=Toxoplasma_gondii_GT1 | gene_product=NTF2 domain-containing protein [Source:UniProtKB/TrEMBL;Acc:A0A125YLB6] | transcript_product=putative nuclear transport factor 2 | location=TGGT1_chrVIII:2601784-2603899(+) | protein_length=125 | sequence_SO=chromosome | SO=protein_coding_gene | is_pseudo=false	0.008	2.856	11	1	1	1	125	13.8	5.35	0	1	0.899	0.562	0.505	2.161	1.214	0.592121	0.432741	0.413887	0.169798	0.801685	0.956627	0.876723	0.901358	0.667295	0.953777	24.44	71.67	84.3	35.28	147.04	0.899	0.641	1.077	0.562	0.01	1.088	0.505	0.01	1.171	2.161	1.647	100	1.214	0.01
FALSE	Low	Master Protein	TGGT1_295340-t26_1-p1	transcript=TGGT1_295340-t26_1 | gene=TGGT1_295340 | organism=Toxoplasma_gondii_GT1 | gene_product=UV excision repair protein RAD23 [Source:UniProtKB/TrEMBL;Acc:A0A125YYY8] | transcript_product=UV excision repair protein Rad23 protein | location=TGGT1_chrIa:1797323-1802019(+) | protein_length=380 | sequence_SO=chromosome | SO=protein_coding_gene | is_pseudo=false	0.069	1.61	2	1	2	1	380	39.7	4.53	0	1	100	0.84	100	1.814	0.981	1e-17	0.818872	1e-17	0.365337	0.710866	1.73608e-16	0.950701	1.34062e-16	0.881077	0.92515	0	35.05	0	52.76	59.92	100	100	0.76	0.84	0.385	1.1	100	100	0.836	1.168	1.814	5.442	0.981	0.699
FALSE	High	Master Protein	TGGT1_258150-t26_1-p1	transcript=TGGT1_258150-t26_1 | gene=TGGT1_258150 | organism=Toxoplasma_gondii_GT1 | gene_product=Proteasome subunit alpha type [Source:UniProtKB/TrEMBL;Acc:A0A125YZI1] | transcript_product=putative proteasome subunit alpha type 7 | location=TGGT1_chrVIIb:3513384-3517343(-) | protein_length=245 | sequence_SO=chromosome | SO=protein_coding_gene | is_pseudo=false	0	5.848	15	2	5	2	245	27.1	6.64	7.66	2	1.233	0.783	0.579	1.78	1.285	0.161614	0.898296	0.587128	0.392475	0.329816	0.625796	0.974587	0.933745	0.902143	0.711139	68.89	72.32	63.17	42.25	104.58	0.66	1.233	1.965	1.528	0.297	0.783	1.008	0.367	0.579	1.78	1.273	100	1.285	0.379
FALSE	Low	Master Protein	TGGT1_202820-t26_1-p1	transcript=TGGT1_202820-t26_1 | gene=TGGT1_202820 | organism=Toxoplasma_gondii_GT1 | gene_product=UBIQUITIN_CONJUGAT_2 domain-containing protein [Source:UniProtKB/TrEMBL;Acc:S7UV33] | transcript_product=ubiquitin-conjugating enzyme subfamily protein | location=TGGT1_chrVIIa:2909267-2911128(+) | protein_length=168 | sequence_SO=chromosome | SO=protein_coding_gene | is_pseudo=false	0.055	1.725	4	1	3	1	168	18.9	5.03	0	1	0.762	1.076	0.707	1.358	1.489	0.119687	0.353455	0.889892	0.894649	0.228867	0.55786	0.833119	0.981398	0.986633	0.590091	23.59	55.78	30.53	38.55	70.4	0.762	1.263	0.657	1.481	0.464	1.076	1.128	0.586	0.707	1.005	1.358	2.04	1.489	0.63
FALSE	High	Master Protein	TGGT1_230160-t26_1-p1	transcript=TGGT1_230160-t26_1 | gene=TGGT1_230160 | organism=Toxoplasma_gondii_GT1 | gene_product=hypothetical protein | transcript_product=hypothetical protein | location=TGGT1_chrVIII:647435-648305(-) | protein_length=142 | sequence_SO=chromosome | SO=protein_coding_gene | is_pseudo=false	0	122.648	97	18	330	18	142	15.8	6.18	714.51	18	1.224	1.081	1.424	1.041	1.185	0.175962	0.496792	0.20262	0.564442	0.558084	0.661429	0.909352	0.771623	0.940113	0.86452	19.57	19.42	2.04	38.78	23.32	0.996	1.385	1.224	0.927	1.081	1.223	0.823	1.424	1.443	1.581	1.041	0.769	1.371	1.185
FALSE	Medium	Master Protein	TGGT1_203135-t26_1-p1	transcript=TGGT1_203135-t26_1 | gene=TGGT1_203135 | organism=Toxoplasma_gondii_GT1 | gene_product=Dynein heavy chain family protein [Source:UniProtKB/TrEMBL;Acc:S7UUU8] | transcript_product=dynein heavy chain family protein | location=TGGT1_chrVIIa:2644696-2697652(-) | protein_length=4551 | sequence_SO=chromosome | SO=protein_coding_gene | is_pseudo=false	0.024	2.178	0	1	3	1	4551	518.7	5.68	1.67	1	0.907	0.81	0.494	1.369	1.091	0.628996	0.850055	0.387863	0.878311	0.835255	0.965361	0.962211	0.898096	0.986633	0.958229	21.43	19.32	74.17	2.4	84.01	0.609	0.907	1.06	0.81	0.346	0.932	0.494	0.313	0.988	1.346	1.369	4.445	1.091	0.473
FALSE	High	Master Protein	TGGT1_261500-t26_1-p1	transcript=TGGT1_261500-t26_1 | gene=TGGT1_261500 | organism=Toxoplasma_gondii_GT1 | gene_product=Hydrolase [Source:UniProtKB/TrEMBL;Acc:S7WE79] | transcript_product=hydrolase | location=TGGT1_chrVIIb:1664223-1668817(-) | protein_length=501 | sequence_SO=chromosome | SO=protein_coding_gene | is_pseudo=false	0.001	4.222	5	2	3	2	501	53.1	5.36	0	2	100	0.467	9.488	100	100	1e-17	0.170143	3.32962e-07	1e-17	1e-17	1.73608e-16	0.629251	3.91344e-06	1.03865e-16	1.03758e-16	0	44.53	774.28	0	0	1.93	100	100	0.467	0.01	0.667	0.9		100	100	100	100	100
FALSE	High	Master Protein	TGGT1_301120-t26_1-p1	transcript=TGGT1_301120-t26_1 | gene=TGGT1_301120 | organism=Toxoplasma_gondii_GT1 | gene_product=Acetyl-CoA acetyltransferase [Source:UniProtKB/TrEMBL;Acc:A0A125YTZ2] | transcript_product=acetyl-CoA acetyltransferase | location=TGGT1_chrIV:2160787-2165762(-) | protein_length=413 | sequence_SO=chromosome | SO=protein_coding_gene | is_pseudo=false	0	61.807	50	16	68	16	413	43.9	8.27	65.88	16	1.112	1.162	1.124	0.9	1.124	0.443539	0.370491	0.425606	0.334208	0.776218	0.924143	0.833119	0.904295	0.86944	0.942756	17.9	14.39	18.24	1.34	5.37	1.112	0.978	1.373	1.162	1.274	0.945	1.124	1.262	0.957	0.968	0.892	0.9	1.164	1.124
FALSE	High	Master Protein	TGGT1_283878-t26_1-p1	transcript=TGGT1_283878-t26_1 | gene=TGGT1_283878 | organism=Toxoplasma_gondii_GT1 | gene_product=RRM domain-containing protein [Source:UniProtKB/TrEMBL;Acc:S7UNP7] | transcript_product=RNA recognition motif-containing protein | location=TGGT1_chrV:2720401-2725785(+) | protein_length=666 | sequence_SO=chromosome | SO=protein_coding_gene | is_pseudo=false	0	5.625	4	2	4	2	666	72.6	10.29	6.21	2	1.187	0.802	0.636	1.569	1.258	0.242276	0.910682	0.723956	0.604368	0.596527	0.768347	0.974587	0.969176	0.943274	0.885436	1.2	36.69	62.33	4.38	43.8	1.187	1.085	1.197	1.066	0.586	0.802	1.265	0.636	0.448	0.914	1.615	1.569	0.887	1.854
FALSE	High	Master Protein	TGGT1_231440-t26_1-p1	transcript=TGGT1_231440-t26_1 | gene=TGGT1_231440 | organism=Toxoplasma_gondii_GT1 | gene_product=LsmAD domain-containing protein [Source:UniProtKB/TrEMBL;Acc:S7WJ46] | transcript_product=LsmAD domain-containing protein | location=TGGT1_chrVIII:1418874-1426956(-) | protein_length=1524 | sequence_SO=chromosome | SO=protein_coding_gene | is_pseudo=false	0	7.518	3	3	13	3	1524	148	9.44	3.54	3	0.871	0.521	0.321	1.843	1.163	0.465156	0.287083	0.0832843	0.342945	0.621911	0.934036	0.779484	0.47556	0.86944	0.897666	6.57	44.83	15.87	23.03	0.37	0.834	0.945	0.871	0.747	0.322	0.521	0.623	0.29	0.321	1.557	1.843	2.237	1.163	0.457
FALSE	High	Master Protein	TGGT1_200280-t26_1-p1	transcript=TGGT1_200280-t26_1 | gene=TGGT1_200280 | organism=Toxoplasma_gondii_GT1 | gene_product=WD domain, G-beta repeat-containing protein [Source:UniProtKB/TrEMBL;Acc:S7V4I8] | transcript_product=WD domain, G-beta repeat-containing protein | location=TGGT1_chrVIII:6745388-6748234(-) | protein_length=948 | sequence_SO=chromosome | SO=protein_coding_gene | is_pseudo=false	0	5.331	3	2	2	2	948	102	7.28	2.02	2	0.868	0.667	0.671	1.62	10.392	0.450643	0.710308	0.806012	0.546276	2.09641e-11	0.926635	0.933509	0.973927	0.934143	1.80355e-10	6.7	34.43	31.34	17.84	705.6	1.598	0.83	0.868	0.868	0.667	0.479	1.388	0.554	0.671	100	1.62	1.425	100	1.08
FALSE	Medium	Master Protein	TGGT1_224960-t26_1-p1	transcript=TGGT1_224960-t26_1 | gene=TGGT1_224960 | organism=Toxoplasma_gondii_GT1 | gene_product=hypothetical protein | transcript_product=hypothetical protein | location=TGGT1_chrX:2542741-2543484(+) | protein_length=247 | sequence_SO=chromosome | SO=protein_coding_gene | is_pseudo=false	0.014	2.478	4	1	6	1	247	28.7	7.3	6.23	1	1.448	0.074	0.107	0.596	0.339	0.0170153	8.55116e-12	7.75135e-05	0.0387058	6.92419e-09	0.143353	1.24354e-10	0.000816032	0.237424	5.59161e-08	8.4	143.26	142.96	129	40.03	1.366	1.448	3.31	2.19	0.074	0.01	2.992	0.107	0.01	0.212	4.587	0.596	0.464	0.339
FALSE	Medium	Master Protein	TGGT1_261460-t26_1-p1	transcript=TGGT1_261460-t26_1 | gene=TGGT1_261460 | organism=Toxoplasma_gondii_GT1 | gene_product=FACT complex subunit SSRP1 [Source:UniProtKB/TrEMBL;Acc:S7WE73] | transcript_product=transcriptional elongation factor FACT80 | location=TGGT1_chrVIIb:1701910-1709548(-) | protein_length=539 | sequence_SO=chromosome | SO=protein_coding_gene | is_pseudo=false	0.041	1.827	2	1	1	1	539	60.8	5.48	0	1	0.832	0.634	0.756	1.218	0.947	0.310599	0.604102	0.996629	0.873844	0.613403	0.8432	0.91465	0.999983	0.986633	0.893922	33.37	52.81	20.82	44.68	30.76	0.679	1.388	0.832	1.113	0.634	0.467	0.756	0.879	0.389	0.851	1.218	2.557	0.947	0.771
FALSE	High	Master Protein	TGGT1_283550-t26_1-p1	transcript=TGGT1_283550-t26_1 | gene=TGGT1_283550 | organism=Toxoplasma_gondii_GT1 | gene_product=hypothetical protein | transcript_product=hypothetical protein | location=TGGT1_chrV:2910449-2923806(+) | protein_length=4211 | sequence_SO=chromosome | SO=protein_coding_gene | is_pseudo=false	0	6.991	1	3	3	3	4211	455.5	7.14	2	3	0.989	0.607	0.417	2.168	1.407	0.962081	0.554934	0.227846	0.166984	0.354027	0.990122	0.91465	0.81455	0.665184	0.736	22.6	13.85	32.31	45.07	9.09	1.167	0.989	0.686	0.875	0.555	0.607	1.319	0.342	0.417	1.509	2.168	100	1.321	1.407
FALSE	High	Master Protein	TGGT1_226290-t26_1-p1	transcript=TGGT1_226290-t26_1 | gene=TGGT1_226290 | organism=Toxoplasma_gondii_GT1 | gene_product=hypothetical protein | transcript_product=hypothetical protein | location=TGGT1_chrX:1645559-1647183(-) | protein_length=333 | sequence_SO=chromosome | SO=protein_coding_gene | is_pseudo=false	0	17.427	15	6	17	6	333	37.7	7.09	11.39	6	1.384	0.837	1.045	1.229	1.046	0.034864	0.835329	0.515436	0.892771	0.913939	0.246943	0.956163	0.926406	0.986633	0.978711	17.77	4.09	31.76	53.55	29.97	1.55	0.885	1.384	0.837	1.015	0.815	1.561	0.821	1.045	1.806	0.785	1.229	1.755	0.834
FALSE	High	Master Protein	TGGT1_213350-t26_1-p1	transcript=TGGT1_213350-t26_1 | gene=TGGT1_213350 | organism=Toxoplasma_gondii_GT1 | gene_product=Ribosomal protein RPS15 [Source:UniProtKB/TrEMBL;Acc:A0A125YHZ1] | transcript_product=ribosomal protein RPS15 | location=TGGT1_chrV:820008-821446(-) | protein_length=150 | sequence_SO=chromosome | SO=protein_coding_gene | is_pseudo=false	0	23.61	37	4	49	4	150	17.1	10.2	74.24	4	1.026	0.889	0.805	0.992	0.926	0.78721	0.929422	0.902015	0.480614	0.415755	0.980608	0.977578	0.985048	0.915333	0.791739	17.35	34.71	45.35	19.24	8.49	1.304	0.906	1.026	1.161	0.889	0.573	2.82	0.805	0.616	0.878	0.992	1.72	0.926	0.982
FALSE	High	Master Protein	TGGT1_306920-t26_1-p1	transcript=TGGT1_306920-t26_1 | gene=TGGT1_306920 | organism=Toxoplasma_gondii_GT1 | gene_product=hypothetical protein | transcript_product=hypothetical protein | location=TGGT1_chrXI:162761-166466(-) | protein_length=475 | sequence_SO=chromosome | SO=protein_coding_gene | is_pseudo=false	0	76.532	38	16	62	16	475	49.8	4.64	144.4	16	0.914	2.793	2.552	0.135	1.015	0.661853	0.000397569	0.0141786	1.66024e-09	0.77043	0.969107	0.0040852	0.115859	1.51117e-08	0.942756	53.18	34.66	13.63	145.39	20.64	0.914	100	0.673	2.793	0.327	3.445	2.552	100	2.318	0.135	6.978	0.031	1.015	0.441
FALSE	Medium	Master Protein	TGGT1_205240-t26_1-p1	transcript=TGGT1_205240-t26_1 | gene=TGGT1_205240 | organism=Toxoplasma_gondii_GT1 | gene_product=Cleft lip and palate transmembrane protein 1 (Clptm1) protein [Source:UniProtKB/TrEMBL;Acc:S7W9T1] | transcript_product=cleft lip and palate transmembrane protein 1 (clptm1) protein | location=TGGT1_chrVIIa:1429206-1438379(-) | protein_length=794 | sequence_SO=chromosome | SO=protein_coding_gene | is…	0.012	2.595	1	1	3	1	794	88.3	5.76	0	1	1.038	0.641	0.721	1.583	1.083	0.731005	0.627221	0.920815	0.588156	0.973565	0.973495	0.920368	0.987295	0.942063	0.996261	12.48	24.3	19.73	58.33	28.97	0.737	1.038	1.125	1.128	0.55	0.641	0.832	0.571	0.721	0.96	1.583	2.354	1.083	0.871
FALSE	High	Master Protein	TGGT1_234450-t26_1-p1	transcript=TGGT1_234450-t26_1 | gene=TGGT1_234450 | organism=Toxoplasma_gondii_GT1 | gene_product=Ribosomal protein RPS15A [Source:UniProtKB/TrEMBL;Acc:S7UWC7] | transcript_product=ribosomal protein RPS15A | location=TGGT1_chrX:4292801-4294683(+) | protein_length=231 | sequence_SO=chromosome | SO=protein_coding_gene | is_pseudo=false	0	20.29	23	7	43	7	231	26.6	9.67	36.35	7	1.097	1.035	0.77	1.254	1.083	0.495832	0.58449	0.974208	0.935736	0.941231	0.942037	0.91465	0.995022	0.992622	0.987369	17.44	18.88	0.46	18.74	11.75	0.642	1.097	1.226	1.167	1.035	0.636	0.77	1.012	0.767	1.095	1.254	4.067	0.997	1.083
FALSE	High	Master Protein	TGGT1_223960-t26_1-p1	transcript=TGGT1_223960-t26_1 | gene=TGGT1_223960 | organism=Toxoplasma_gondii_GT1 | gene_product=VWFA domain-containing protein [Source:UniProtKB/TrEMBL;Acc:A0A125YXU7] | transcript_product=ubiquitin interaction motif family protein | location=TGGT1_chrX:3328529-3332678(-) | protein_length=388 | sequence_SO=chromosome | SO=protein_coding_gene | is_pseudo=false	0.006	3.324	6	1	1	1	388	41.4	4.59	0	1	0.089	2.71	0.143	1	100	1e-17	0.000205633	0.000762634	0.49359	1e-17	1.73608e-16	0.00220541	0.00735213	0.915333	1.03758e-16	650.89	2733.4	152.39	7412.26	0	0.01		0.791	100		0.073	0.352		0.058		0.01	100	100	0.01
FALSE	High	Master Protein	TGGT1_218540-t26_1-p1	transcript=TGGT1_218540-t26_1 | gene=TGGT1_218540 | organism=Toxoplasma_gondii_GT1 | gene_product=AB hydrolase-1 domain-containing protein [Source:UniProtKB/TrEMBL;Acc:A0A125YXV8] | transcript_product=putative peptidase S15 | location=TGGT1_chrXII:1410645-1414447(-) | protein_length=412 | sequence_SO=chromosome | SO=protein_coding_gene | is_pseudo=false	0	9.509	11	4	9	4	412	45.1	8.91	3.65	4	0.794	1.094	0.941	0.898	0.821	0.19305	0.280071	0.661214	0.331461	0.238339	0.685876	0.777197	0.941345	0.86944	0.605396	4.21	22.92	12.43	43.15	18.37	0.772	0.794	0.949	1.263	0.85	1.094	0.941	0.67	1.027	0.668	0.898	1.267	0.821	0.731
FALSE	High	Master Protein	TGGT1_293690-t26_1-p1	transcript=TGGT1_293690-t26_1 | gene=TGGT1_293690 | organism=Toxoplasma_gondii_GT1 | gene_product=Profilin [Source:UniProtKB/TrEMBL;Acc:S7UIQ6] | transcript_product=profilin PRF | location=TGGT1_chrIa:496750-498091(-) | protein_length=165 | sequence_SO=chromosome | SO=protein_coding_gene | is_pseudo=false	0	17.724	41	4	24	4	165	17.7	4.58	22.02	4	0.746	0.483	0.395	1.913	0.766	0.0926465	0.0803093	0.188491	0.294866	0.058807	0.472778	0.412607	0.748728	0.850784	0.250548	22.47	4.77	9.93	45.72	29.38	0.746	0.986	0.648	0.483	0.468	0.878	0.37	0.395	0.593	1.323	1.913	9.949	0.64	0.766
FALSE	High	Master Protein	TGGT1_221470-t26_1-p1	transcript=TGGT1_221470-t26_1 | gene=TGGT1_221470 | organism=Toxoplasma_gondii_GT1 | gene_product=hypothetical protein | transcript_product=hypothetical protein | location=TGGT1_chrII:360683-367434(+) | protein_length=552 | sequence_SO=chromosome | SO=protein_coding_gene | is_pseudo=false	0	20.783	15	7	26	7	552	61.6	6.18	8.66	7	0.966	0.639	0.481	2.447	0.879	0.924181	0.498033	0.359057	0.0882381	0.270493	0.985103	0.909352	0.89526	0.454843	0.644067	8.77	8.07	30.25	54.33	99.81	0.747	1.027	0.966	0.675	0.104	0.639	0.481	0.106	0.604	1.202	2.447	3.344	0.879	0.217
FALSE	Medium	Master Protein	TGGT1_232040-t26_1-p1	transcript=TGGT1_232040-t26_1 | gene=TGGT1_232040 | organism=Toxoplasma_gondii_GT1 | gene_product=hypothetical protein | transcript_product=hypothetical protein | location=TGGT1_chrVIII:1775251-1777362(+) | protein_length=703 | sequence_SO=chromosome | SO=protein_coding_gene | is_pseudo=false	0.027	2.113	2	1	1	1	703	77.4	7.8	2.04	1	0.641	0.456	0.235	1.14	0.357	0.00894039	0.119595	0.0180323	0.737441	5.01946e-06	0.0887036	0.523535	0.143923	0.969165	3.70402e-05	36.31	58.88	76.46	46.55	86.94	0.641	0.998	0.515	0.756	0.077	0.456	0.485	0.077	0.235	1.14	1.984	0.782	0.862	0.152
FALSE	High	Master Protein	TGGT1_312622-t26_1-p1	transcript=TGGT1_312622-t26_1 | gene=TGGT1_312622 | organism=Toxoplasma_gondii_GT1 | gene_product=DUF803 domain-containing protein [Source:UniProtKB/TrEMBL;Acc:S7UTD5] | transcript_product=DUF803 domain-containing protein | location=TGGT1_chrXI:2792522-2800888(-) | protein_length=814 | sequence_SO=chromosome | SO=protein_coding_gene | is_pseudo=false	0	6.057	5	2	5	2	814	86.8	8.05	0	2	0.971	0.74	0.659	1.576	1.108	0.948302	0.925832	0.77858	0.596329	0.840736	0.987619	0.977578	0.972757	0.942063	0.959846	0.11	8.09	19.68	25.42	7.7	0.971	0.891	0.972	0.782	0.74	0.531	0.76	0.659	0.516	0.977	1.576	1.846	1.108	1.166
FALSE	High	Master Protein	TGGT1_232230-t26_1-p1	transcript=TGGT1_232230-t26_1 | gene=TGGT1_232230 | organism=Toxoplasma_gondii_GT1 | gene_product=Ribosomal_L7Ae domain-containing protein [Source:UniProtKB/TrEMBL;Acc:A0A125YGX8] | transcript_product=ribosomal protein RPL30 | location=TGGT1_chrVIII:1959965-1961788(-) | protein_length=108 | sequence_SO=chromosome | SO=protein_coding_gene | is_pseudo=false	0	30.653	61	6	47	6	108	11.7	9.33	48.86	6	0.907	0.518	0.551	1.06	0.562	0.629479	0.123422	0.520992	0.597018	0.000255161	0.965361	0.530807	0.926406	0.942063	0.00176143	17.63	49.58	27.82	26.07	46.54	0.907	1.03	0.764	0.518	0.388	0.863	0.551	0.464	0.724	0.874	1.06	2.066	0.562	0.427
FALSE	High	Master Protein	TGGT1_261760-t26_1-p1	transcript=TGGT1_261760-t26_1 | gene=TGGT1_261760 | organism=Toxoplasma_gondii_GT1 | gene_product=CDP-alcohol phosphatidyltransferase superfamily protein [Source:UniProtKB/TrEMBL;Acc:S7UYP1] | transcript_product=CDP-alcohol phosphatidyltransferase superfamily protein | location=TGGT1_chrVIIb:1513735-1518555(+) | protein_length=449 | sequence_SO=chromosome | SO=protein_coding_gene | is_pseudo=false	0.007	3.2	2	1	2	1	449	49.3	8.25	4.18	1	0.485	1.152	0.623	0.698	1.004	1.5546e-05	0.224031	0.693094	0.100081	0.848887	0.000225685	0.714969	0.949436	0.50278	0.96407	17.85	31.79	62.05	30.68	6.67	0.433	0.485	0.969	1.438	0.905	1.152	0.623	0.439	1.116	0.698	1.159	0.578	1.004	1.049
FALSE	High	Master Protein	TGGT1_305480-t26_1-p1	transcript=TGGT1_305480-t26_1 | gene=TGGT1_305480 | organism=Toxoplasma_gondii_GT1 | gene_product=Elp3 domain-containing protein [Source:UniProtKB/TrEMBL;Acc:S7VWF8] | transcript_product=elongator complex protein ELP3 | location=TGGT1_chrIX:5208033-5215974(+) | protein_length=984 | sequence_SO=chromosome | SO=protein_coding_gene | is_pseudo=false	0.005	3.42	2	1	1	1	984	108.3	8.31	2.02	1
FALSE	High	Master Protein	TGGT1_312630-t26_1-p1	transcript=TGGT1_312630-t26_1 | gene=TGGT1_312630 | organism=Toxoplasma_gondii_GT1 | gene_product=Putative anonymous antigen-1 [Source:UniProtKB/TrEMBL;Acc:S7W1P0] | transcript_product=putative anonymous antigen-1 | location=TGGT1_chrXI:2804165-2821550(-) | protein_length=2639 | sequence_SO=chromosome | SO=protein_coding_gene | is_pseudo=false	0	164.227	25	50	212	50	2639	286	5	229.41	50	0.995	0.698	0.678	1.23	1.073	0.93231	0.521229	0.82227	0.895723	0.980865	0.986187	0.91465	0.973927	0.986633	0.997174	12.53	1.18	12.84	17.68	33.12	0.796	1.087	0.995	1.011	0.698	0.692	0.76	0.678	0.624	1.084	1.23	2.083	1.073	0.834
FALSE	Low	Master Protein	TGGT1_219430-t26_1-p1	transcript=TGGT1_219430-t26_1 | gene=TGGT1_219430 | organism=Toxoplasma_gondii_GT1 | gene_product=AA_TRNA_LIGASE_II domain-containing protein [Source:UniProtKB/TrEMBL;Acc:S7WHW0] | transcript_product=tRNA ligase class II core domain (G, H, P, S and T) domain-containing protein | location=TGGT1_chrXII:890626-897747(+) | protein_length=1203 | sequence_SO=chromosome | SO=protein_coding_gene | is_pse…	0.064	1.665	1	1	1	1	1203	131.5	9.47	0	1	0.843	0.804	0.733	1.221	1.094	0.352169	0.936434	0.948183	0.879771	0.946843	0.87471	0.979189	0.993783	0.986633	0.989404	4.45	3.27	12.12	16.72	32.75	0.819	1.576	0.843	0.896	0.787	0.804	0.733	1.24	0.678	1.221	1.083	1.842	1.094	0.852
FALSE	High	Master Protein	TGGT1_216000-t26_1-p1	transcript=TGGT1_216000-t26_1 | gene=TGGT1_216000 | organism=Toxoplasma_gondii_GT1 | gene_product=Alveolin domain containing intermediate filament IMC3 [Source:UniProtKB/TrEMBL;Acc:A0A125YIN0] | transcript_product=alveolin domain containing intermediate filament IMC3 | location=TGGT1_chrXI:6395592-6397208(+) | protein_length=538 | sequence_SO=chromosome | SO=protein_coding_gene | is_pseudo=false	0	182.953	38	15	488	15	538	58	5.34	1400.68	15	1.091	1.152	1.327	0.878	1.083	0.514382	0.383853	0.257359	0.301518	0.938479	0.942037	0.843396	0.83465	0.850784	0.986296	15.36	1.58	36.57	21.27	18.19	1.261	0.978	1.091	0.758	1.164	1.152	1.327	1	1.681	1.608	0.878	0.767	1.216	1.083
FALSE	High	Master Protein	TGGT1_315770-t26_1-p1	transcript=TGGT1_315770-t26_1 | gene=TGGT1_315770 | organism=Toxoplasma_gondii_GT1 | gene_product=Cytochrome p450 superfamily protein [Source:UniProtKB/TrEMBL;Acc:S7UM31] | transcript_product=cytochrome p450 superfamily protein | location=TGGT1_chrXI:4913385-4919784(-) | protein_length=553 | sequence_SO=chromosome | SO=protein_coding_gene | is_pseudo=false	0	27.748	19	9	42	9	553	62.6	7.97	49.82	9	0.905	0.682	0.69	1.396	1.009	0.617761	0.499244	0.850461	0.835987	0.744589	0.965361	0.909352	0.977229	0.984232	0.936683	20.53	37.65	5.82	43.75	57.1	0.781	0.905	1.05	0.915	0.424	0.682	0.718	0.428	0.69	0.984	1.396	1.99	1.009	0.621
FALSE	High	Master Protein	TGGT1_315610-t26_1-p1	transcript=TGGT1_315610-t26_1 | gene=TGGT1_315610 | organism=Toxoplasma_gondii_GT1 | gene_product=hypothetical protein | transcript_product=hypothetical protein | location=TGGT1_chrXI:4798811-4799287(+) | protein_length=158 | sequence_SO=chromosome | SO=protein_coding_gene | is_pseudo=false	0	10.719	23	2	19	2	158	16	11.78	42.63	2	0.719	0.667	0.362	1.22	0.701	0.0564958	0.680382	0.136584	0.878289	0.0206732	0.338139	0.931816	0.631747	0.986633	0.108566	69.82	59.96	89.02	62.21	20.62	1.359	0.719	0.324	0.667	0.166	1.12	0.907	0.119	0.362	1.22	1.732	0.626	0.814	0.287
FALSE	Low	Master Protein	TGGT1_265410-t26_1-p1	transcript=TGGT1_265410-t26_1 | gene=TGGT1_265410 | organism=Toxoplasma_gondii_GT1 | gene_product=WD_REPEATS_REGION domain-containing protein [Source:UniProtKB/TrEMBL;Acc:S7UGX7] | transcript_product=G-protein beta WD-40 repeat containing protein | location=TGGT1_chrIX:1391452-1393275(+) | protein_length=607 | sequence_SO=chromosome | SO=protein_coding_gene | is_pseudo=false	0.062	1.676	3	1	2	1	607	67.3	6.46	0	1	1.039	0.391	0.441	1.891	0.739	0.726846	0.0890102	0.274653	0.309192	0.205116	0.973495	0.444947	0.844363	0.860669	0.558279	12.73	72.07	53.44	1.05	99.66	1.128	1.039	0.907	0.391	0.216	0.761	0.441	0.224	0.689	1.891	1.878	2.965	0.739	0.405
FALSE	High	Master Protein	TGGT1_211420-t26_1-p1	transcript=TGGT1_211420-t26_1 | gene=TGGT1_211420 | organism=Toxoplasma_gondii_GT1 | gene_product=RRM domain-containing protein [Source:UniProtKB/TrEMBL;Acc:S7VTD0] | transcript_product=RNA recognition motif-containing protein | location=TGGT1_chrIV:1661239-1664919(-) | protein_length=189 | sequence_SO=chromosome | SO=protein_coding_gene | is_pseudo=false	0.001	4.698	11	2	8	2	189	22.8	7.03	5.24	2	0.995	0.486	0.419	1.583	1.314	0.93372	0.159113	0.232278	0.587599	0.32377	0.987015	0.616224	0.825237	0.942063	0.705209	5.88	61.47	24.82	9.38	120.04	0.505	0.995	1.036	0.83	0.164	0.486	0.419	0.182	0.503	1.583	1.483	100	1.314	0.25
FALSE	High	Master Protein	TGGT1_206670-t26_1-p1	transcript=TGGT1_206670-t26_1 | gene=TGGT1_206670 | organism=Toxoplasma_gondii_GT1 | gene_product=hypothetical protein | transcript_product=hypothetical protein | location=TGGT1_chrVIIa:705099-714174(-) | protein_length=2072 | sequence_SO=chromosome | SO=protein_coding_gene | is_pseudo=false	0	8.899	3	4	4	4	2072	218.3	5.41	2.18	4	0.955	0.551	0.485	2.078	0.888	0.866003	0.37029	0.368774	0.204772	0.475887	0.985103	0.833119	0.89526	0.739189	0.838288	8.13	2.26	13.56	18.05	8.13	0.955	1.01	0.881	0.559	0.427	0.551	0.534	0.432	0.485	1.359	2.078	2.331	0.681	0.888
FALSE	High	Master Protein	TGGT1_216450-t26_1-p1	transcript=TGGT1_216450-t26_1 | gene=TGGT1_216450 | organism=Toxoplasma_gondii_GT1 | gene_product=Proteasome subunit alpha type [Source:UniProtKB/TrEMBL;Acc:S7VUL7] | transcript_product=peptidase, T1 family protein | location=TGGT1_chrXI:6058951-6061605(+) | protein_length=260 | sequence_SO=chromosome | SO=protein_coding_gene | is_pseudo=false	0	10.365	14	4	12	4	260	27.9	5.2	7.48	4	0.895	0.796	0.422	1.593	1.19	0.573876	0.905077	0.237155	0.576325	0.540629	0.956627	0.974587	0.830689	0.940113	0.86452	15.89	29.24	61.34	55.49	109.6	0.542	1.003	0.895	0.796	0.195	0.992	0.422	0.176	0.719	0.997	1.593	2.683	1.19	0.31
FALSE	High	Master Protein	TGGT1_239680-t26_1-p1	transcript=TGGT1_239680-t26_1 | gene=TGGT1_239680 | organism=Toxoplasma_gondii_GT1 | gene_product=hypothetical protein | transcript_product=hypothetical protein | location=TGGT1_chrVI:820561-824385(-) | protein_length=601 | sequence_SO=chromosome | SO=protein_coding_gene | is_pseudo=false	0	7.151	7	3	3	3	601	65.4	7.53	4.88	3	0.926	0.839	0.844	1.092	1.089	0.721543	0.825961	0.827076	0.653012	0.976527	0.973495	0.95266	0.973927	0.958014	0.996908	2.44	3.42	16.42	21.74	41.71	1.005	0.926	0.911	0.839	0.82	1.384	0.844	0.76	1.004	0.932	1.092	1.298	0.782	1.089
FALSE	High	Master Protein	TGGT1_258870A-t26_1-p1	transcript=TGGT1_258870A-t26_1 | gene=TGGT1_258870A | organism=Toxoplasma_gondii_GT1 | gene_product=hypothetical protein | transcript_product=hypothetical protein | location=TGGT1_chrVIIb:3082018-3084228(-) | protein_length=557 | sequence_SO=chromosome | SO=protein_coding_gene | is_pseudo=false	0	44.68	24	11	44	6	557	60.6	5.07	48.26	11	1.03	0.667	0.508	1.74	1.21	0.765445	0.639177	0.418847	0.427152	0.507144	0.978747	0.923073	0.904295	0.914823	0.850688	13.56	74.44	45.66	12.12	40.61	0.907	1.125	1.03	0.441	1.34	0.667	0.388	0.85	0.508	1.74	1.414	1.882	0.859	1.541
FALSE	High	Master Protein	TGGT1_297060-t26_1-p1	transcript=TGGT1_297060-t26_1 | gene=TGGT1_297060 | organism=Toxoplasma_gondii_GT1 | gene_product=Phosphoglycerate mutase [Source:UniProtKB/TrEMBL;Acc:S7UKZ1] | transcript_product=phosphoglycerate mutase PGMII | location=TGGT1_chrII:1486715-1490594(-) | protein_length=339 | sequence_SO=chromosome | SO=protein_coding_gene | is_pseudo=false	0	20.035	17	4	17	4	339	38.1	8.13	36.95	4	0.833	0.404	0.293	2.815	0.898	0.312747	0.0593397	0.0548679	0.0376071	0.38901	0.8432	0.338295	0.351318	0.231523	0.773179	10.13	64.47	74.94	32.61	96.38	0.779	0.896	0.833	0.404	0.059	0.714	0.293	0.06	0.592	2.815	2.196	3.834	0.898	0.141
FALSE	High	Master Protein	TGGT1_264660-t26_1-p1	transcript=TGGT1_264660-t26_1 | gene=TGGT1_264660 | organism=Toxoplasma_gondii_GT1 | gene_product=SAG-related sequence SRS44 [Source:UniProtKB/TrEMBL;Acc:S7VP87] | transcript_product=SAG-related sequence SRS44 | location=TGGT1_chrIX:1955976-1963333(+) | protein_length=2359 | sequence_SO=chromosome | SO=protein_coding_gene | is_pseudo=false	0	13.314	3	5	6	5	2359	251.8	8.02	2.03	5	0.861	0.735	0.773	1.854	1.58	0.421872	0.889138	0.96728	0.335013	0.0776851	0.913831	0.974587	0.994815	0.86944	0.302266	10	36.63	22.34	17.9	56.06	0.861	0.807	1.257	0.446	0.976	0.735	0.384	0.773	0.91	1.239	2.078	1.854	0.553	2.178
FALSE	High	Master Protein	TGGT1_258540-t26_1-p1	transcript=TGGT1_258540-t26_1 | gene=TGGT1_258540 | organism=Toxoplasma_gondii_GT1 | gene_product=Phosphoglycerate mutase family protein [Source:UniProtKB/TrEMBL;Acc:S7W7J2] | transcript_product=phosphoglycerate mutase family protein | location=TGGT1_chrVIIb:3309066-3319730(-) | protein_length=2618 | sequence_SO=chromosome | SO=protein_coding_gene | is_pseudo=false	0	7.832	1	3	3	3	2618	285.2	6.99	1.87	3	1.696	0.736	1.249	2.094	2.261	0.000784273	0.921251	0.31292	0.197575	0.0157021	0.00957041	0.977578	0.875234	0.728437	0.0858847	0.08	21.41	24.93	38.27	96.31	1.697	1.696	0.833	0.736	1.062	0.643	1.249	1.458	0.647	100	2.094	1.553	100	2.261
FALSE	High	Master Protein	TGGT1_243950-t26_1-p1	transcript=TGGT1_243950-t26_1 | gene=TGGT1_243950 | organism=Toxoplasma_gondii_GT1 | gene_product=Prohibitin [Source:UniProtKB/TrEMBL;Acc:A0A125YRG2] | transcript_product=putative prohibitin | location=TGGT1_chrVI:2820162-2822544(+) | protein_length=271 | sequence_SO=chromosome | SO=protein_coding_gene | is_pseudo=false	0	12.733	17	4	16	4	271	30.2	8.1	11.32	4	1.023	0.765	0.568	1.551	0.833	0.799146	0.929137	0.560803	0.626122	0.175366	0.985103	0.977578	0.926406	0.949833	0.505431	9.52	32.5	18.28	61.29	1.19	1.023	1.089	0.783	0.98	0.522	0.765	1.02	0.568	0.506	0.91	1.551	2.391	0.827	0.833
FALSE	High	Master Protein	TGGT1_244100-t26_1-p1	transcript=TGGT1_244100-t26_1 | gene=TGGT1_244100 | organism=Toxoplasma_gondii_GT1 | gene_product=Nop domain-containing protein [Source:UniProtKB/TrEMBL;Acc:S7UEN2] | transcript_product=snoRNA binding domain-containing protein | location=TGGT1_chrVI:2934030-2942235(-) | protein_length=553 | sequence_SO=chromosome | SO=protein_coding_gene | is_pseudo=false	0	20.21	18	7	15	7	553	59.8	6.73	4.91	7	0.97	1.083	1.182	1.076	0.943	0.943486	0.319028	0.368483	0.624649	0.560805	0.987619	0.799201	0.89526	0.94931	0.86452	10.33	30.67	49.28	3.45	14.9	0.907	1.218	0.97	1.307	1.083	0.641	1.182	1.576	0.616	1.051	1.076	1.809	1.136	0.943
FALSE	High	Master Protein	TGGT1_232710-t26_1-p1	transcript=TGGT1_232710-t26_1 | gene=TGGT1_232710 | organism=Toxoplasma_gondii_GT1 | gene_product=40S ribosomal protein S3a [Source:UniProtKB/TrEMBL;Acc:A0A125YZM8] | transcript_product=ribosomal protein RPS3A | location=TGGT1_chrVIII:2231374-2232762(+) | protein_length=259 | sequence_SO=chromosome | SO=protein_coding_gene | is_pseudo=false	0	87.323	61	17	194	17	259	29.4	9.57	250.69	17	1.1	1.013	1.257	0.82	1.061	0.485056	0.629631	0.30615	0.224204	0.96871	0.941301	0.920368	0.873918	0.781023	0.99592	8.55	13.29	21.21	11.34	0.77	1.163	0.948	1.1	1.104	1.013	0.784	1.437	1.257	0.847	0.761	0.82	1.373	0.811	1.067
FALSE	High	Master Protein	TGGT1_286450-t26_1-p1	transcript=TGGT1_286450-t26_1 | gene=TGGT1_286450 | organism=Toxoplasma_gondii_GT1 | gene_product=Dense granule protein GRA5 [Source:UniProtKB/TrEMBL;Acc:A0A125YQQ2] | transcript_product=dense granule protein GRA5 | location=TGGT1_chrV:1680404-1680766(+) | protein_length=120 | sequence_SO=chromosome | SO=protein_coding_gene | is_pseudo=false	0	11.063	24	3	12	3	120	13	5.99	3	3	0.93	0.811	0.28	3.474	0.798	0.742497	0.824864	0.0443875	0.00828304	0.201584	0.973495	0.95266	0.300106	0.0586745	0.553951	24.92	13.39	90.17	110.03	138.34	0.93	1.118	0.345	0.891	0.088	0.811	0.714	0.115	0.28	0.896	3.474	29.813	0.798	0.413
FALSE	High	Master Protein	TGGT1_260320-t26_1-p1	transcript=TGGT1_260320-t26_1 | gene=TGGT1_260320 | organism=Toxoplasma_gondii_GT1 | gene_product=Noc2p family protein [Source:UniProtKB/TrEMBL;Acc:S7W780] | transcript_product=Noc2p family protein | location=TGGT1_chrVIIb:2326057-2331884(+) | protein_length=1036 | sequence_SO=chromosome | SO=protein_coding_gene | is_pseudo=false	0	16.09	8	6	14	6	1036	115.2	8.84	9.99	6	0.972	1.226	1.128	1.101	0.912	0.952096	0.289739	0.421716	0.668662	0.36744	0.988844	0.78298	0.904295	0.964904	0.750048	15.24	71.76	78.97	41.93	0.02	1.288	0.972	0.881	1.957	1.226	0.633	1.758	1.128	0.527	0.505	1.101	1.412	0.912	1.314
FALSE	Medium	Master Protein	TGGT1_289510-t26_1-p1	transcript=TGGT1_289510-t26_1 | gene=TGGT1_289510 | organism=Toxoplasma_gondii_GT1 | gene_product=hypothetical protein | transcript_product=hypothetical protein | location=TGGT1_chrIX:3071681-3076774(+) | protein_length=986 | sequence_SO=chromosome | SO=protein_coding_gene | is_pseudo=false	0.038	1.892	2	1	2	1	986	101.1	5.26	0	1	2.092	0.351	0.84	100	100	3.38835e-06	0.0478238	0.834562	1e-17	1e-17	4.96172e-05	0.288963	0.974841	1.03865e-16	1.03758e-16	38.66	52.5	21.44	0	0	1.547	100	2.092	0.543	0.108	0.351	0.84	100	0.734	100	2.814	100	100	0.304
FALSE	High	Master Protein	TGGT1_319900-t26_1-p1	transcript=TGGT1_319900-t26_1 | gene=TGGT1_319900 | organism=Toxoplasma_gondii_GT1 | gene_product=hypothetical protein | transcript_product=hypothetical protein | location=TGGT1_chrIV:622899-634009(-) | protein_length=2426 | sequence_SO=chromosome | SO=protein_coding_gene | is_pseudo=false	0	182.082	29	54	192	54	2426	264.7	9.64	191.21	54	1.059	0.995	1.397	0.878	1.264	0.63985	0.667569	0.216215	0.302637	0.341002	0.965361	0.930583	0.796004	0.852478	0.725211	10.78	13.88	16.46	24.47	26.18	1.52	0.982	1.059	0.91	1.931	0.995	1.397	1.741	1.242	1.265	0.754	0.878	1.264	1.487
FALSE	High	Master Protein	TGGT1_237150-t26_1-p1	transcript=TGGT1_237150-t26_1 | gene=TGGT1_237150 | organism=Toxoplasma_gondii_GT1 | gene_product=Putative minor histocompatibility antigen h13 [Source:UniProtKB/TrEMBL;Acc:S7UR45] | transcript_product=putative minor histocompatibility antigen h13 | location=TGGT1_chrX:5632583-5637249(-) | protein_length=417 | sequence_SO=chromosome | SO=protein_coding_gene | is_pseudo=false	0	22.357	16	5	13	5	417	46.2	6.47	12.05	5	0.97	1.161	0.924	0.933	0.904	0.944404	0.37172	0.688548	0.384735	0.342621	0.987619	0.833119	0.946753	0.897185	0.727426	22.66	24.83	30.87	49.03	0.62	0.97	1.145	0.659	1.355	0.965	1.161	1.189	0.924	0.765	0.656	0.933	1.394	0.904	0.901
FALSE	High	Master Protein	TGGT1_270320-t26_1-p1	transcript=TGGT1_270320-t26_1 | gene=TGGT1_270320 | organism=Toxoplasma_gondii_GT1 | gene_product=PPM-type phosphatase domain-containing protein [Source:UniProtKB/TrEMBL;Acc:A0A125YP66] | transcript_product=protein phosphatase 2C domain-containing protein | location=TGGT1_chrVIII:5274953-5280379(+) | protein_length=538 | sequence_SO=chromosome | SO=protein_coding_gene | is_pseudo=false	0	63.511	40	18	77	18	538	58.7	5.08	69.33	18	0.997	0.734	0.857	1.469	1.149	0.922371	0.624609	0.803513	0.732155	0.682441	0.985103	0.920368	0.973927	0.969165	0.912342	11.53	28.76	31.19	22.25	9.86	0.997	0.925	1.265	0.615	1.083	0.734	0.652	1.085	0.857	1.469	1.177	1.689	1.072	1.149
FALSE	High	Master Protein	TGGT1_312110-t26_1-p1	transcript=TGGT1_312110-t26_1 | gene=TGGT1_312110 | organism=Toxoplasma_gondii_GT1 | gene_product=Thioredoxin domain-containing protein [Source:UniProtKB/TrEMBL;Acc:S7UTI6] | transcript_product=apicoplast-associated thioredoxin family protein Atrx1 | location=TGGT1_chrXI:2396639-2404968(-) | protein_length=790 | sequence_SO=chromosome | SO=protein_coding_gene | is_pseudo=false	0	23.372	16	8	19	8	790	86.9	7.81	12.06	8	1	0.719	0.54	1.464	0.928	0.905976	0.815876	0.494472	0.738466	0.45277	0.985103	0.950701	0.926268	0.969165	0.821126	21.18	24.23	29.6	40.34	37.56	0.648	1	1.143	0.86	0.513	0.719	0.54	0.45	0.852	1.066	1.464	2.246	0.928	0.741
FALSE	High	Master Protein	TGGT1_288040-t26_1-p1	transcript=TGGT1_288040-t26_1 | gene=TGGT1_288040 | organism=Toxoplasma_gondii_GT1 | gene_product=hypothetical protein | transcript_product=hypothetical protein | location=TGGT1_chrIX:2123272-2134120(-) | protein_length=1287 | sequence_SO=chromosome | SO=protein_coding_gene | is_pseudo=false	0	22.067	7	9	15	9	1287	138	6.07	11.74	9	1.239	0.603	0.815	2.547	1.412	0.152466	0.497591	0.88325	0.0700076	0.156156	0.617196	0.909352	0.981008	0.396398	0.470669	15.56	48.53	33.15	29.47	24.07	1.369	1.035	1.239	0.603	1.014	0.455	0.815	1.049	0.592	2.547	1.334	3.053	1.79	1.412
FALSE	Medium	Master Protein	TGGT1_230380-t26_1-p1	transcript=TGGT1_230380-t26_1 | gene=TGGT1_230380 | organism=Toxoplasma_gondii_GT1 | gene_product=Protein translocation complex, SEC61 gamma subunit [Source:UniProtKB/TrEMBL;Acc:S7WB99] | transcript_product=protein translocation complex, SEC61 gamma subunit | location=TGGT1_chrVIII:734700-735864(-) | protein_length=149 | sequence_SO=chromosome | SO=protein_coding_gene | is_pseudo=false	0.026	2.149	5	1	3	1	149	16.8	10.58	0	1	0.891	0.43	0.383	2.113	0.908	0.55243	0.114203	0.168223	0.189209	0.513297	0.946874	0.516225	0.712867	0.715489	0.852342	24.8	112.49	84.95	2.77	146.91	0.891	1.07	0.503	0.43	0.01	1.781	0.383	0.01	0.896	2.113	2.074	100	0.908	0.01
FALSE	High	Master Protein	TGGT1_225690-t26_1-p1	transcript=TGGT1_225690-t26_1 | gene=TGGT1_225690 | organism=Toxoplasma_gondii_GT1 | gene_product=hypothetical protein | transcript_product=hypothetical protein | location=TGGT1_chrX:2025685-2031135(+) | protein_length=1816 | sequence_SO=chromosome | SO=protein_coding_gene | is_pseudo=false	0	317.204	49	66	435	66	1816	194	6.13	545.46	66	1.047	1.182	1.339	0.892	1.206	0.692841	0.342987	0.249929	0.322106	0.492155	0.973495	0.82651	0.830689	0.866168	0.847237	3.93	33.11	12.84	19.09	19.58	1.442	1.019	1.047	0.918	1.508	1.182	1.223	1.56	1.339	1.464	0.79	0.892	1.531	1.206
FALSE	High	Master Protein	TGGT1_315270-t26_1-p1	transcript=TGGT1_315270-t26_1 | gene=TGGT1_315270 | organism=Toxoplasma_gondii_GT1 | gene_product=hypothetical protein | transcript_product=hypothetical protein | location=TGGT1_chrXI:4558433-4565813(-) | protein_length=780 | sequence_SO=chromosome | SO=protein_coding_gene | is_pseudo=false	0	8.032	5	3	7	3	780	84.5	5.24	1.78	3	0.929	0.5	0.358	2.47	0.907	0.737982	0.196578	0.130893	0.0836373	0.517651	0.973495	0.67777	0.613695	0.440806	0.855743	23.08	3.4	43.04	39.35	101.58	0.804	1.146	0.929	0.5	0.155	0.512	0.505	0.19	0.358	1.815	2.47	3.646	0.907	0.424
FALSE	Low	Master Protein	TGGT1_255450-t26_1-p1	transcript=TGGT1_255450-t26_1 | gene=TGGT1_255450 | organism=Toxoplasma_gondii_GT1 | gene_product=hypothetical protein | transcript_product=hypothetical protein | location=TGGT1_chrVIIb:4723734-4728848(+) | protein_length=625 | sequence_SO=chromosome | SO=protein_coding_gene | is_pseudo=false	0.077	1.561	2	1	1	1	625	68.3	6.76	0	1		100	100	0.01	1		1e-17	1e-17	1e-17	0.700822		1.60374e-16	1.34062e-16	1.03865e-16	0.923165		0	0	0	7412.26					100			100				0.01		100
FALSE	High	Master Protein	TGGT1_247580-t26_1-p1	transcript=TGGT1_247580-t26_1 | gene=TGGT1_247580 | organism=Toxoplasma_gondii_GT1 | gene_product=Glutaredoxin domain-containing protein [Source:UniProtKB/TrEMBL;Acc:S7WH76] | transcript_product=glutaredoxin domain-containing protein | location=TGGT1_chrXII:3356004-3357311(-) | protein_length=312 | sequence_SO=chromosome | SO=protein_coding_gene | is_pseudo=false	0	17.4	24	6	6	6	312	34.3	7.53	11.54	6	0.925	0.807	1.012	1.225	1.504	0.716541	0.819348	0.558701	0.886744	0.0911417	0.973495	0.950701	0.926406	0.986633	0.329845	22.09	31	65.49	33.6	93.29	1.421	0.805	0.925	0.668	1.648	0.807	1.012	1.459	0.488	100	0.947	1.225	100	1.504
FALSE	Medium	Master Protein	TGGT1_308580-t26_1-p1	transcript=TGGT1_308580-t26_1 | gene=TGGT1_308580 | organism=Toxoplasma_gondii_GT1 | gene_product=Lon protease homolog [Source:UniProtKB/TrEMBL;Acc:S7US17] | transcript_product=Lon protease family protein | location=TGGT1_chrXI:217235-229804(+) | protein_length=1498 | sequence_SO=chromosome | SO=protein_coding_gene | is_pseudo=false	0.039	1.869	1	1	4	1	1498	164.1	7.72	0	1	0.716	0.393	0.282	0.7	0.286	0.0531538	0.0176785	0.0457651	0.101308	6.30607e-14	0.329085	0.13364	0.306769	0.504456	5.93186e-13	9.36	70.52	94.22	19.74	26.12	1.03	0.674	0.716	0.75	0.195	0.393	0.773	0.131	0.282	0.7	1.463	0.617	0.525	0.286
FALSE	High	Master Protein	TGGT1_318440-t26_1-p1	transcript=TGGT1_318440-t26_1 | gene=TGGT1_318440 | organism=Toxoplasma_gondii_GT1 | gene_product=Helicase associated domain (Ha2) protein [Source:UniProtKB/TrEMBL;Acc:S7UJM8] | transcript_product=helicase associated domain (ha2) protein | location=TGGT1_chrIV:1264045-1277404(-) | protein_length=2234 | sequence_SO=chromosome | SO=protein_coding_gene | is_pseudo=false	0	269.021	44	71	367	71	2234	236.8	8.97	433.07	71	1.049	0.719	0.902	1.365	1.157	0.68237	0.57989	0.724739	0.883002	0.652904	0.969375	0.91465	0.969176	0.986633	0.898562	13.2	41.1	7.85	14.68	4.28	1.259	0.956	1.049	0.719	1.027	0.563	0.902	0.952	0.541	1.365	1.23	2.203	0.982	1.19
FALSE	Medium	Master Protein	TGGT1_305450-t26_1-p1	transcript=TGGT1_305450-t26_1 | gene=TGGT1_305450 | organism=Toxoplasma_gondii_GT1 | gene_product=N-acetyltransferase domain-containing protein [Source:UniProtKB/TrEMBL;Acc:S7UI34] | transcript_product=acetyltransferase, GNAT family protein | location=TGGT1_chrIX:5171087-5173734(-) | protein_length=519 | sequence_SO=chromosome | SO=protein_coding_gene | is_pseudo=false	0.018	2.29	3	1	3	1	519	56.8	7.94	0	1	100	0.01	0.227	100	100	1e-17	1e-17	0.0149954	1e-17	1e-17	1.73608e-16	1.60374e-16	0.121953	1.03865e-16	1.03758e-16	0	0	0	0	0	100	100	0.805	0.01	0.01	0.282			0.227	100	100	100
FALSE	Low	Master Protein	TGGT1_289070-t26_1-p1	transcript=TGGT1_289070-t26_1 | gene=TGGT1_289070 | organism=Toxoplasma_gondii_GT1 | gene_product=E1-E2 ATPase subfamily protein [Source:UniProtKB/TrEMBL;Acc:S7W4S8] | transcript_product=E1-E2 ATPase subfamily protein | location=TGGT1_chrIX:2766488-2779639(+) | protein_length=2014 | sequence_SO=chromosome | SO=protein_coding_gene | is_pseudo=false	0.05	1.747	0	1	1	1	2014	219.8	7.78	0	1	1.073	0.01	0.01	100	100	0.583298	1e-17	1e-17	1e-17	1e-17	0.956627	1.60374e-16	1.34062e-16	1.03865e-16	1.03758e-16	35.99	0	0	0	0	1.334	1.073	0.565	0.01	0.431	0.01	0.01	0.463	0.01	100	100	100		100
FALSE	High	Master Protein	TGGT1_227360-t26_1-p1	transcript=TGGT1_227360-t26_1 | gene=TGGT1_227360 | organism=Toxoplasma_gondii_GT1 | gene_product=Ribosomal protein RPL3 [Source:UniProtKB/TrEMBL;Acc:A0A125YQV1] | transcript_product=ribosomal protein RPL3 | location=TGGT1_chrX:901297-903989(-) | protein_length=389 | sequence_SO=chromosome | SO=protein_coding_gene | is_pseudo=false	0	82.377	48	21	168	21	389	44	10.3	188.52	21	0.992	1.206	1.152	0.922	1.022	0.945391	0.313014	0.397595	0.367005	0.799877	0.987619	0.798919	0.901174	0.881333	0.952287	17.85	16.53	1.15	26.24	6.15	1.128	0.859	0.992	0.816	1.206	1.341	1.1	1.161	1.152	1.12	0.922	0.639	1.022	1.198
FALSE	High	Master Protein	TGGT1_322000-t26_1-p1	transcript=TGGT1_322000-t26_1 | gene=TGGT1_322000 | organism=Toxoplasma_gondii_GT1 | gene_product=Protein kinase domain-containing protein [Source:UniProtKB/TrEMBL;Acc:S7UGI6] | transcript_product=myosin-light-chain kinase | location=AAQM03000432:1144-2627(+) | protein_length=204 | sequence_SO=contig | SO=protein_coding_gene | is_pseudo=false	0	26.142	40	7	38	7	204	22	6.39	67.84	7	1.226	0.768	0.909	1.19	0.925	0.172331	0.725635	0.711898	0.824969	0.411953	0.652147	0.93859	0.965602	0.980849	0.788886	7.27	7.5	14.7	24.22	17.68	1.226	0.889	1.286	0.768	1.374	0.732	0.909	1.174	0.827	1.456	0.995	1.19	0.925	1.418
FALSE	High	Master Protein	TGGT1_277720-t26_1-p1	transcript=TGGT1_277720-t26_1 | gene=TGGT1_277720 | organism=Toxoplasma_gondii_GT1 | gene_product=GDA1/CD39 (Nucleoside phosphatase) family protein [Source:UniProtKB/TrEMBL;Acc:S7V0B7] | transcript_product=GDA1/CD39 (nucleoside phosphatase) family protein | location=TGGT1_chrXII:6466417-6468990(+) | protein_length=857 | sequence_SO=chromosome | SO=protein_coding_gene | is_pseudo=false	0	7.353	4	3	4	3	857	92.4	6.34	0	3	0.858	0.918	0.902	2.376	2.256	0.41128	0.653228	0.725038	0.103986	0.0118588	0.91043	0.927717	0.969176	0.511768	0.0659163	71.85	9.92	50.65	75.97	53	0.57	0.858	1.666	0.918	1.595	0.86	0.523	1.369	0.902	100	1.158	2.376	100	2.256
FALSE	High	Master Protein	TGGT1_269410-t26_1-p1	transcript=TGGT1_269410-t26_1 | gene=TGGT1_269410 | organism=Toxoplasma_gondii_GT1 | gene_product=hypothetical protein | transcript_product=hypothetical protein | location=TGGT1_chrVIII:5829826-5831837(+) | protein_length=217 | sequence_SO=chromosome | SO=protein_coding_gene | is_pseudo=false	0	38.824	62	11	68	11	217	24.1	8.87	88.42	11	1.065	0.073	0.083	20.411	1.1	0.615027	1.04361e-13	8.35245e-06	1.72085e-13	0.86897	0.965361	1.58481e-12	9.36785e-05	1.7239e-12	0.969518	9.19	34.5	30.66	50.71	21.34	1.065	0.999	1.192	0.096	0.015	0.073	0.105	0.015	0.083	11.811	27.393	20.411	1.1	0.395
FALSE	High	Master Protein	TGGT1_250840-t26_1-p1	transcript=TGGT1_250840-t26_1 | gene=TGGT1_250840 | organism=Toxoplasma_gondii_GT1 | gene_product=hypothetical protein | transcript_product=hypothetical protein | location=TGGT1_chrXII:5188017-5201995(+) | protein_length=885 | sequence_SO=chromosome | SO=protein_coding_gene | is_pseudo=false	0	66.207	28	20	48	20	885	100.2	8.73	29.16	20	1.149	1.218	1.328	1.031	1.415	0.334424	0.298979	0.257169	0.546206	0.110671	0.867749	0.790063	0.83465	0.934143	0.372238	22.73	22.12	15.41	39.49	4.37	1.428	0.972	1.149	1.036	1.408	1.218	1.098	1.466	1.328	1.37	0.756	1.031	1.415	1.457
FALSE	High	Master Protein	TGGT1_239400-t26_1-p1	transcript=TGGT1_239400-t26_1 | gene=TGGT1_239400 | organism=Toxoplasma_gondii_GT1 | gene_product=hypothetical protein | transcript_product=hypothetical protein | location=TGGT1_chrVI:611132-617706(+) | protein_length=1265 | sequence_SO=chromosome | SO=protein_coding_gene | is_pseudo=false	0	118.578	35	34	153	34	1265	133.9	9.69	162.87	34	1.01	0.882	0.925	1.328	1.201	0.861589	0.948848	0.686899	0.942138	0.506938	0.985103	0.985607	0.946278	0.994413	0.850688	9.37	28.07	10.44	33.47	3.85	1.324	0.946	1.01	0.741	1.21	0.882	0.925	1.164	0.864	1.724	1.028	1.328	1.201	1.297
FALSE	High	Master Protein	TGGT1_217740-t26_1-p1	transcript=TGGT1_217740-t26_1 | gene=TGGT1_217740 | organism=Toxoplasma_gondii_GT1 | gene_product=3-ketoacyl-(Acyl-carrier-protein) reductase [Source:UniProtKB/TrEMBL;Acc:S7V1K3] | transcript_product=3-ketoacyl-(acyl-carrier-protein) reductase | location=TGGT1_chrXII:2024723-2028460(+) | protein_length=376 | sequence_SO=chromosome | SO=protein_coding_gene | is_pseudo=false	0	76.358	57	16	131	16	376	39	9.23	223.4	16	1.019	1.386	1.323	0.798	0.972	0.816229	0.153092	0.260001	0.197922	0.588325	0.985103	0.605315	0.834653	0.728437	0.8812	7.92	58.11	48.74	12.05	0.81	1.203	1.019	0.965	0.719	1.93	1.386	0.888	1.939	1.323	1.399	0.798	0.738	0.966	1.408
FALSE	Low	Master Protein	TGGT1_233450-t26_1-p1	transcript=TGGT1_233450-t26_1 | gene=TGGT1_233450 | organism=Toxoplasma_gondii_GT1 | gene_product=SAG-related sequence SRS29A [Source:UniProtKB/TrEMBL;Acc:S7V3P1] | transcript_product=SAG-related sequence SRS29A | location=TGGT1_chrVIII:2656903-2658165(+) | protein_length=420 | sequence_SO=chromosome | SO=protein_coding_gene | is_pseudo=false	0.059	1.694	1	1	1	1	420	44.2	7.27	0	1	1.126	0.103	0.188	100	4.936	0.398469	1.54108e-09	0.00483939	1e-17	8.3869e-09	0.905563	2.1156e-08	0.0425866	1.03865e-16	6.70952e-08	91.13	114.12	93.14	0	1498.1	0.161	1.818	1.126	0.01	0.103	0.448	0.01	0.188	0.505	100	2.361	100		0.244
FALSE	High	Master Protein	TGGT1_263130-t26_1-p1	transcript=TGGT1_263130-t26_1 | gene=TGGT1_263130 | organism=Toxoplasma_gondii_GT1 | gene_product=Citrate synthase [Source:UniProtKB/TrEMBL;Acc:S7WDG5] | transcript_product=putative citrate synthase | location=TGGT1_chrVIIb:754263-759706(+) | protein_length=620 | sequence_SO=chromosome | SO=protein_coding_gene | is_pseudo=false	0	8.211	7	3	9	3	620	69.1	8.37	2.15	3	0.964	0.513	0.494	1.826	1.054	0.910219	0.22	0.388667	0.355574	0.93217	0.985103	0.712301	0.898096	0.872265	0.984501	3.93	62.19	12.72	51.39	54.21	0.656	0.99	0.964	0.884	0.322	0.513	0.541	0.318	0.494	1.193	1.826	3.549	1.054	0.669
FALSE	Medium	Master Protein	TGGT1_227920-t26_1-p1	transcript=TGGT1_227920-t26_1 | gene=TGGT1_227920 | organism=Toxoplasma_gondii_GT1 | gene_product=hypothetical protein | transcript_product=hypothetical protein | location=TGGT1_chrX:647805-649182(-) | protein_length=85 | sequence_SO=chromosome | SO=protein_coding_gene | is_pseudo=false	0.028	2.107	12	1	4	1	85	9.5	9.83	0	1	0.937	0.873	0.571	100	100	0.777928	0.747166	0.568217	1e-17	1e-17	0.979507	0.943561	0.926406	1.03865e-16	1.03758e-16	1	21.56	41.85	0	0	0.654	0.937	0.944	0.873	0.475	1.021	0.571	0.445	0.964	100	1.711	100	100	0.813
FALSE	High	Master Protein	TGGT1_278490-t26_1-p1	transcript=TGGT1_278490-t26_1 | gene=TGGT1_278490 | organism=Toxoplasma_gondii_GT1 | gene_product=zf-NOSIP domain-containing protein [Source:UniProtKB/TrEMBL;Acc:S7UZM6] | transcript_product=Zn-finger, RING domain containing protein | location=TGGT1_chrXII:5987769-5994159(-) | protein_length=289 | sequence_SO=chromosome | SO=protein_coding_gene | is_pseudo=false	0.001	4.322	7	1	1	1	289	32.7	9.16	2.07	1	9.205	0.978	100	100	100	1e-17	0.552532	1e-17	1e-17	1e-17	1.73608e-16	0.91465	1.34062e-16	1.03865e-16	1.03758e-16	798.51	146.81	0	0	0	100		0.847	0.978	100	0.01	100	100	0.01	100		100	100	100
FALSE	Medium	Master Protein	TGGT1_270750-t26_1-p1	transcript=TGGT1_270750-t26_1 | gene=TGGT1_270750 | organism=Toxoplasma_gondii_GT1 | gene_product=hypothetical protein | transcript_product=hypothetical protein | location=TGGT1_chrVIII:5020711-5023978(+) | protein_length=1011 | sequence_SO=chromosome | SO=protein_coding_gene | is_pseudo=false	0.032	2.028	1	1	1	1	1011	108.6	9.91	0	1	1.647	0.533	0.702	100	100	0.00148204	0.360003	0.877187	1e-17	1e-17	0.016978	0.833119	0.981008	1.03865e-16	1.03758e-16	1.66	34.41	16.68	0	0	1.666	1.647	0.909	0.533	0.426	0.694	0.887	0.702	0.631	100	2.691	100	100	1.146
FALSE	High	Master Protein	TGGT1_272350-t26_1-p1	transcript=TGGT1_272350-t26_1 | gene=TGGT1_272350 | organism=Toxoplasma_gondii_GT1 | gene_product=mRNA export protein [Source:UniProtKB/TrEMBL;Acc:A0A125YTD5] | transcript_product=mRNA export protein | location=TGGT1_chrVIII:4054234-4060874(-) | protein_length=375 | sequence_SO=chromosome | SO=protein_coding_gene | is_pseudo=false	0	51.548	40	10	53	10	375	41.5	8.78	59.05	10	0.801	0.051	0.036	21.64	0.903	0.211185	1e-17	8.06274e-10	5.28466e-14	0.467513	0.723064	1.60374e-16	1.04028e-08	5.38972e-13	0.830272	7.01	7.41	10.36	37.46	0.66	0.801	0.84	0.703	0.054	0.035	0.051	0.039	0.033	0.036	14.261	21.64	27.108	0.903	0.899
FALSE	High	Master Protein	TGGT1_290630-t26_1-p1	transcript=TGGT1_290630-t26_1 | gene=TGGT1_290630 | organism=Toxoplasma_gondii_GT1 | gene_product=AP2/ERF domain-containing protein [Source:UniProtKB/TrEMBL;Acc:S7UP83] | transcript_product=AP2 domain transcription factor AP2IX-7 | location=TGGT1_chrIX:3593432-3601897(+) | protein_length=2671 | sequence_SO=chromosome | SO=protein_coding_gene | is_pseudo=false	0.002	3.997	1	1	1	1	2671	278.5	8.21	3.21	1	100	1	100	100	100	1e-17	0.499999	1e-17	1e-17	1e-17	1.73608e-16	0.909352	1.34062e-16	1.03865e-16	1.03758e-16	0	7412.26	0	0	0			100		100	0.01		100				100		100
FALSE	High	Master Protein	TGGT1_231890-t26_1-p1	transcript=TGGT1_231890-t26_1 | gene=TGGT1_231890 | organism=Toxoplasma_gondii_GT1 | gene_product=Putative beta-ketoacyl-acyl carrier protein synthase III [Source:UniProtKB/TrEMBL;Acc:S7V2Q4] | transcript_product=putative beta-ketoacyl-acyl carrier protein synthase III | location=TGGT1_chrVIII:1611987-1616797(+) | protein_length=646 | sequence_SO=chromosome | SO=protein_coding_gene | is_pseudo=fa…	0	5.416	4	2	3	2	646	69	9.29	1.73	2	0.716	0.943	0.8	1.204	1.069	0.0527625	0.621815	0.912917	0.849907	0.944465	0.327868	0.920342	0.985261	0.984724	0.988945	6.23	8.96	10.96	54.89	42.9	0.716	0.687	1.766		1.002	0.888	0.745	0.8	1.568	100	0.758	1.204	100	0.76
FALSE	High	Master Protein	TGGT1_234190-t26_1-p1	transcript=TGGT1_234190-t26_1 | gene=TGGT1_234190 | organism=Toxoplasma_gondii_GT1 | gene_product=Serine hydroxymethyltransferase [Source:UniProtKB/TrEMBL;Acc:S7UVS8] | transcript_product=putative serine hydroxymethyltransferase 2 | location=TGGT1_chrX:4074410-4078362(-) | protein_length=595 | sequence_SO=chromosome | SO=protein_coding_gene | is_pseudo=false	0	17.199	15	5	21	5	595	65.2	8.02	10.06	5	0.77	0.58	0.505	1.499	0.715	0.136	0.44447	0.412335	0.691967	0.0476386	0.589266	0.882541	0.901174	0.9684	0.216093	46.43	67.85	9.03	90.25	86.68	0.513	0.77	1.121	1.07	0.301	0.58	0.537	0.25	0.505	0.587	1.499	100	0.715	0.451
FALSE	High	Master Protein	TGGT1_225150-t26_1-p1	transcript=TGGT1_225150-t26_1 | gene=TGGT1_225150 | organism=Toxoplasma_gondii_GT1 | gene_product=hypothetical protein | transcript_product=hypothetical protein | location=TGGT1_chrX:2357556-2361015(+) | protein_length=691 | sequence_SO=chromosome | SO=protein_coding_gene | is_pseudo=false	0	11.814	9	5	10	5	691	76.8	9.47	2.82	5	1.041	0.875	0.908	1.155	1.347	0.715463	0.632077	0.713722	0.76465	0.22682	0.973495	0.920368	0.965602	0.971965	0.587466	2.28	29.91	40.31	2.35	2.99	1.058	1.041	0.918	0.875	1.185	0.728	0.908	1.248	0.631	1.155	1.137	1.855	0.944	1.347
FALSE	High	Master Protein	TGGT1_291880-t26_1-p1	transcript=TGGT1_291880-t26_1 | gene=TGGT1_291880 | organism=Toxoplasma_gondii_GT1 | gene_product=hypothetical protein | transcript_product=hypothetical protein | location=TGGT1_chrIX:4192980-4199567(+) | protein_length=783 | sequence_SO=chromosome | SO=protein_coding_gene | is_pseudo=false	0	37.432	20	11	59	11	783	80.2	9.69	90.19	11	1.155	0.871	0.968	1.299	1.101	0.316811	0.979208	0.620545	0.98838	0.867266	0.845498	0.996041	0.93387	0.995636	0.969164	14.19	28.69	7.14	18.59	10.09	1.266	0.983	1.155	0.73	1.181	0.871	0.968	1.227	0.923	1.299	0.865	1.462	1.026	1.101
FALSE	High	Master Protein	TGGT1_201270-t26_1-p1	transcript=TGGT1_201270-t26_1 | gene=TGGT1_201270 | organism=Toxoplasma_gondii_GT1 | gene_product=hypothetical protein | transcript_product=hypothetical protein | location=TGGT1_chrVIIa:3819439-3825216(-) | protein_length=964 | sequence_SO=chromosome | SO=protein_coding_gene | is_pseudo=false	0	15.62	7	4	10	4	964	103.5	7.81	12.3	4	1.237	0.713	0.887	1.514	1.307	0.155857	0.877454	0.749483	0.672381	0.290611	0.623426	0.97331	0.972757	0.964904	0.660906	38.44	37.5	22.07	22.05	56.69	1.588	0.916	1.237	0.713	1.149	0.569	1.133	0.887	0.772	1.833	1.289	1.514	1.307	2.267
FALSE	Medium	Master Protein	TGGT1_235402-t26_1-p1	transcript=TGGT1_235402-t26_1 | gene=TGGT1_235402 | organism=Toxoplasma_gondii_GT1 | gene_product=CorA family Mg2+ transporter protein [Source:UniProtKB/TrEMBL;Acc:S7URR7] | transcript_product=CorA family Mg2+ transporter protein | location=TGGT1_chrX:4734620-4741000(+) | protein_length=1187 | sequence_SO=chromosome | SO=protein_coding_gene | is_pseudo=false	0.037	1.895	1	1	1	1	1187	127.6	8.66	0	1	1.373	0.25	0.184	1.922	0.484	0.0392566	0.00423154	0.00422431	0.289203	0.00342847	0.267644	0.0382175	0.0377547	0.846378	0.0214217	58.01	20.55	91.31	0.88	19.79	1.911	0.632	1.373	0.25	0.29	0.01	0.478	0.184	0.01	1.933	1.922	0.582	0.484	0.558
FALSE	High	Master Protein	TGGT1_286420A-t26_1-p1	transcript=TGGT1_286420A-t26_1 | gene=TGGT1_286420A | organism=Toxoplasma_gondii_GT1 | gene_product=Elongation factor 1-alpha [Source:UniProtKB/TrEMBL;Acc:S7W358] | transcript_product=putative elongation factor 1-alpha (EF-1-ALPHA) | location=TGGT1_chrV:1692242-1694172(-) | protein_length=448 | sequence_SO=chromosome | SO=protein_coding_gene | is_pseudo=false	0	207.223	74	28	561	8	448	49.5	8.78	1092.78	28	1.078	0.773	0.889	1.004	0.923	0.564267	0.739343	0.745804	0.499843	0.405237	0.956627	0.94258	0.972757	0.915333	0.783915	19.03	1.63	13.4	3.87	7.5	0.883	1.078	1.216	1.348	0.765	0.773	0.978	0.889	0.779	1.004	0.977	1.902	0.923	0.879
FALSE	High	Master Protein	TGGT1_244470-t26_1-p1	transcript=TGGT1_244470-t26_1 | gene=TGGT1_244470 | organism=Toxoplasma_gondii_GT1 | gene_product=hypothetical protein | transcript_product=hypothetical protein | location=TGGT1_chrVI:3203997-3215302(-) | protein_length=2595 | sequence_SO=chromosome | SO=protein_coding_gene | is_pseudo=false	0	366.464	45	107	380	107	2595	290.1	6.04	354.86	107	1.112	1.295	1.439	0.895	1.346	0.44191	0.220951	0.1949	0.326647	0.189504	0.923296	0.713837	0.756719	0.86944	0.529252	10.23	15.05	6.13	21.67	1.42	1.212	1.036	1.112	1.164	1.785	1.295	1.38	1.835	1.439	1.218	0.781	0.895	1.346	1.359
FALSE	High	Master Protein	TGGT1_306330-t26_1-p1	transcript=TGGT1_306330-t26_1 | gene=TGGT1_306330 | organism=Toxoplasma_gondii_GT1 | gene_product=Hydrolase_4 domain-containing protein [Source:UniProtKB/TrEMBL;Acc:S7UI80] | transcript_product=phospholipase | location=TGGT1_chrIX:5748642-5751422(+) | protein_length=582 | sequence_SO=chromosome | SO=protein_coding_gene | is_pseudo=false	0	7.753	7	3	3	3	582	63.2	5.59	0	3	0.95	0.873	0.551	1.499	1.334	0.841718	0.690566	0.521087	0.691817	0.33854	0.985103	0.931816	0.926406	0.9684	0.72357	2.16	2.75	23.75	14.3	42.82	0.95	0.685	0.964	0.89	0.873	0.493	0.845	0.551	0.475	1.499	1.354	100	1.334	0.949
FALSE	High	Master Protein	TGGT1_262640-t26_1-p1	transcript=TGGT1_262640-t26_1 | gene=TGGT1_262640 | organism=Toxoplasma_gondii_GT1 | gene_product=Cg8 family protein [Source:UniProtKB/TrEMBL;Acc:A0A125YRH5] | transcript_product=Cg8 family protein | location=TGGT1_chrVIIb:1085583-1087442(+) | protein_length=204 | sequence_SO=chromosome | SO=protein_coding_gene | is_pseudo=false	0.004	3.472	7	1	3	1	204	23.7	9.48	0	1	0.752	0.736	0.719	1.2	1.147	0.102931	0.913852	0.917119	0.843352	0.84005	0.507209	0.974587	0.985943	0.984724	0.959846	0.89	34.17	37.15	11.19	79.37	0.752	0.748	1.305	0.956	0.481	0.736	0.719	0.359	0.96	1.2	1.109	100	1.147	0.533
FALSE	Medium	Master Protein	TGGT1_314070-t26_1-p1	transcript=TGGT1_314070-t26_1 | gene=TGGT1_314070 | organism=Toxoplasma_gondii_GT1 | gene_product=hypothetical protein | transcript_product=hypothetical protein | location=TGGT1_chrXI:3869843-3870803(-) | protein_length=205 | sequence_SO=chromosome | SO=protein_coding_gene | is_pseudo=false	0.014	2.459	4	1	1	1	205	22.8	5.31	0	1	1.235	0.719	0.863	2.25	1.5	0.15785	0.863934	0.79259	0.138698	0.245238	0.623959	0.967481	0.972757	0.613096	0.613774	4.64	8.44	2.32	59.17	52.17	1.131	1.235	1.274	0.763	0.719	0.667	0.863	0.888	0.85	3.528	1.352	2.25	2.69	0.972
FALSE	High	Master Protein	TGGT1_266460-t26_1-p1	transcript=TGGT1_266460-t26_1 | gene=TGGT1_266460 | organism=Toxoplasma_gondii_GT1 | gene_product=Ubiquitin-like domain-containing protein [Source:UniProtKB/TrEMBL;Acc:A0A125YUS7] | transcript_product=putative small ubiquitin family modifier | location=TGGT1_chrIX:944091-944969(-) | protein_length=91 | sequence_SO=chromosome | SO=protein_coding_gene | is_pseudo=false	0	6.603	27	3	11	3	91	10.3	5.97	3.42	3	1.025	0.396	0.422	2.556	1.012	0.788059	0.0511012	0.238365	0.0685886	0.803057	0.980608	0.303725	0.830689	0.393629	0.954524	21.71	2.72	26.33	10.29	12.77	1.025	0.777	1.176	0.389	0.396	0.601	0.422	0.359	0.583	2.379	2.556	3.75	0.924	1.012
FALSE	High	Master Protein	TGGT1_240710-t26_1-p1	transcript=TGGT1_240710-t26_1 | gene=TGGT1_240710 | organism=Toxoplasma_gondii_GT1 | gene_product=RNA recognition motif-containing protein [Source:UniProtKB/TrEMBL;Acc:S7URD1] | transcript_product=RNA recognition motif-containing protein | location=TGGT1_chrVI:1373239-1386793(+) | protein_length=929 | sequence_SO=chromosome | SO=protein_coding_gene | is_pseudo=false	0	7.043	3	3	5	3	929	102	5.76	1.61	3	1.04	0.367	0.395	3.3	1.459	0.721463	0.0226981	0.189249	0.0122984	0.277459	0.973495	0.161895	0.74896	0.0846393	0.648099	2.81	16.48	30.99	44.26	11.23	1.06	0.895	1.04	0.611	0.331	0.367	0.536	0.327	0.395	2.315	3.3	5.393	1.57	1.091
FALSE	High	Master Protein	TGGT1_202220-t26_1-p1	transcript=TGGT1_202220-t26_1 | gene=TGGT1_202220 | organism=Toxoplasma_gondii_GT1 | gene_product=hypothetical protein | transcript_product=hypothetical protein | location=TGGT1_chrVIIa:3407698-3411144(-) | protein_length=1148 | sequence_SO=chromosome | SO=protein_coding_gene | is_pseudo=false	0	85.03	31	26	78	26	1148	121.9	9.64	82	26	0.986	0.961	1.073	1.138	1.289	0.979588	0.745386	0.4818	0.734047	0.287794	0.99495	0.943561	0.925107	0.969165	0.659575	11.91	30.78	29.21	33.34	6.08	1.312	0.912	0.986	0.796	1.565	0.961	1.073	1.402	0.862	1.72	0.882	1.138	1.341	1.289
FALSE	Medium	Master Protein	TGGT1_306650-t26_1-p1	transcript=TGGT1_306650-t26_1 | gene=TGGT1_306650 | organism=Toxoplasma_gondii_GT1 | gene_product=hypothetical protein | transcript_product=hypothetical protein | location=TGGT1_chrIX:6020484-6022587(-) | protein_length=286 | sequence_SO=chromosome | SO=protein_coding_gene | is_pseudo=false	0.048	1.755	5	1	2	1	286	31.4	7.25	0	1	0.944	0.446	0.44	2.269	2.3	0.810139	0.162187	0.271982	0.13283	0.0191218	0.985103	0.61985	0.844018	0.607786	0.101983	16.2	11.29	6.41	59.68	3.34	0.594	1.06	0.944	1.037	0.415	0.446	0.616	0.44	0.421	2.269	1.356	5.152	2.352	0.562
FALSE	Medium	Master Protein	TGGT1_226950-t26_1-p1	transcript=TGGT1_226950-t26_1 | gene=TGGT1_226950 | organism=Toxoplasma_gondii_GT1 | gene_product=IgA-specific metalloendopeptidase [Source:UniProtKB/TrEMBL;Acc:S7W5T7] | transcript_product=IgA-specific metalloendopeptidase | location=TGGT1_chrX:1106584-1115574(+) | protein_length=2042 | sequence_SO=chromosome | SO=protein_coding_gene | is_pseudo=false	0.035	1.94	0	1	1	1	2042	217.8	5.14	0	1	0.85	0.6	0.406	100	100	0.379122	0.533692	0.208746	1e-17	1e-17	0.890434	0.91465	0.782115	1.03865e-16	1.03758e-16	47.5	147.37	30.08	0	0	1.251	0.01	0.85	0.01	100	0.6	0.01	0.406	0.51	100		100		100
FALSE	Medium	Master Protein	TGGT1_214750-t26_1-p1	transcript=TGGT1_214750-t26_1 | gene=TGGT1_214750 | organism=Toxoplasma_gondii_GT1 | gene_product=hypothetical protein | transcript_product=hypothetical protein | location=TGGT1_chrX:6356533-6365733(-) | protein_length=1108 | sequence_SO=chromosome | SO=protein_coding_gene | is_pseudo=false	0.016	2.39	1	1	1	1	1108	119.9	6.93	0	1
FALSE	High	Master Protein	TGGT1_261210-t26_1-p1	transcript=TGGT1_261210-t26_1 | gene=TGGT1_261210 | organism=Toxoplasma_gondii_GT1 | gene_product=PCI domain-containing protein [Source:UniProtKB/TrEMBL;Acc:A0A125YZG8] | transcript_product=putative 26s proteasome subunit p55 | location=TGGT1_chrVIIb:1803646-1810703(+) | protein_length=485 | sequence_SO=chromosome | SO=protein_coding_gene | is_pseudo=false	0	11.888	10	5	23	5	485	55	6.2	5.17	5	1	0.736	0.589	1.563	0.786	0.910772	0.885007	0.610546	0.611268	0.107079	0.985103	0.974587	0.93387	0.947081	0.367143	8.46	30.66	20.45	41.55	0.75	0.641	1	1.06	0.927	0.473	0.736	0.589	0.517	0.734	1.082	1.563	2.001	0.782	0.786
FALSE	Medium	Master Protein	TGGT1_221480-t26_1-p1	transcript=TGGT1_221480-t26_1 | gene=TGGT1_221480 | organism=Toxoplasma_gondii_GT1 | gene_product=hypothetical protein | transcript_product=hypothetical protein | location=TGGT1_chrII:371405-373756(-) | protein_length=290 | sequence_SO=chromosome | SO=protein_coding_gene | is_pseudo=false	0.034	1.968	3	1	1	1	290	31.7	9.86	1.75	1	1.213	7.34	4.178	0.177	0.709	0.193055	4.38094e-12	0.00056549	1.13117e-07	0.0622254	0.685876	6.59447e-11	0.00554504	9.72116e-07	0.259829	19.45	9.12	141.89	57.46	72.13	1.213	1.372	0.536	7.34	0.131	7.791	8.906	0.179	4.178	0.097	0.289	0.177	0.709	0.038
FALSE	High	Master Protein	TGGT1_309752-t26_1-p1	transcript=TGGT1_309752-t26_1 | gene=TGGT1_309752 | organism=Toxoplasma_gondii_GT1 | gene_product=Succinate--CoA ligase [ADP-forming] subunit beta, mitochondrial [Source:UniProtKB/TrEMBL;Acc:A0A125YHZ3] | transcript_product=putative succinate-Coenzyme A ligase, beta subunit | location=TGGT1_chrXI:749202-752425(+) | protein_length=498 | sequence_SO=chromosome | SO=protein_coding_gene | is_pseudo=f…	0	55.875	37	15	60	15	498	53.4	6.48	74.82	15	0.908	1.048	0.802	0.883	1.252	0.632332	0.558687	0.908022	0.308842	0.36963	0.965361	0.91465	0.985048	0.860669	0.750661	16.36	36.11	1.37	8.42	31.72	0.818	0.908	1.164	1.048	1.563	0.793	0.795	1.316	0.802	0.835	0.883	2.012	0.984	1.252
FALSE	Medium	Master Protein	TGGT1_248500-t26_1-p1	transcript=TGGT1_248500-t26_1 | gene=TGGT1_248500 | organism=Toxoplasma_gondii_GT1 | gene_product=Nup54 domain-containing protein [Source:UniProtKB/TrEMBL;Acc:S7V107] | transcript_product=hypothetical protein | location=TGGT1_chrXII:3823885-3826856(+) | protein_length=346 | sequence_SO=chromosome | SO=protein_coding_gene | is_pseudo=false	0.018	2.247	6	1	1	1	346	37.5	6.43	0	1	11.269	1.49	100	100	13.293	1e-17	0.140499	1e-17	1e-17	2.08877e-12	1.73608e-16	0.572674	1.34062e-16	1.03865e-16	1.84329e-11	649.47	147.27	0	0	547.82	100		1.27	1.49	100	0.01	100	100	0.01	100	0.01	100	100	1.767
FALSE	High	Master Protein	TGGT1_260440-t26_1-p1	transcript=TGGT1_260440-t26_1 | gene=TGGT1_260440 | organism=Toxoplasma_gondii_GT1 | gene_product=NPL domain-containing protein [Source:UniProtKB/TrEMBL;Acc:S7UYY1] | transcript_product=nuclear factor NF3 | location=TGGT1_chrVIIb:2242975-2247472(-) | protein_length=312 | sequence_SO=chromosome | SO=protein_coding_gene | is_pseudo=false	0	14.985	17	6	23	6	312	34.1	4.31	24.89	6	0.937	0.607	0.558	1.439	1.127	0.773705	0.288721	0.537905	0.773318	0.764251	0.979499	0.781669	0.926406	0.971965	0.940377	16.89	50.07	3.13	27.81	72.2	0.664	1.057	0.937	0.917	0.336	0.607	0.558	0.305	0.57	1.169	1.439	6.776	1.127	0.578
FALSE	High	Master Protein	TGGT1_223420-t26_1-p1	transcript=TGGT1_223420-t26_1 | gene=TGGT1_223420 | organism=Toxoplasma_gondii_GT1 | gene_product=J domain-containing protein [Source:UniProtKB/TrEMBL;Acc:S7UVP6] | transcript_product=DnaJ domain-containing protein | location=TGGT1_chrX:3760673-3762245(-) | protein_length=383 | sequence_SO=chromosome | SO=protein_coding_gene | is_pseudo=false	0	5.796	5	2	10	2	383	42.2	6.11	8.46	2	1.387	1.89	2.773	0.544	1.027	0.0337817	0.00856506	0.00878747	0.0207991	0.804418	0.243966	0.0727606	0.0742822	0.136484	0.954783	9.29	57.32	49.07	0.57	87.28	1.387	1.474	0.92	1.89	0.454	2.62	3.691	0.668	2.773	0.544	1.005	0.542	1.027	0.423
FALSE	Medium	Master Protein	TGGT1_283540-t26_1-p1	transcript=TGGT1_283540-t26_1 | gene=TGGT1_283540 | organism=Toxoplasma_gondii_GT1 | gene_product=hypothetical protein | transcript_product=hypothetical protein | location=TGGT1_chrV:2924949-2926408(-) | protein_length=376 | sequence_SO=chromosome | SO=protein_coding_gene | is_pseudo=false	0.043	1.798	2	1	2	1	376	41.9	8.02	0	1	0.877	0.636	0.556	1.559	0.916	0.491017	0.612372	0.532629	0.615961	0.541647	0.941301	0.917255	0.926406	0.947081	0.86452	40.78	55.97	0.55	11.35	131.97	0.877	1.21	0.544	0.636	0.288	1.022	0.558	0.348	0.556	1.44	1.559	8.159	0.916	0.449
FALSE	High	Master Protein	TGGT1_263500-t26_1-p1	transcript=TGGT1_263500-t26_1 | gene=TGGT1_263500 | organism=Toxoplasma_gondii_GT1 | gene_product=Putative vacuolar protein sorting-associated protein 26 [Source:UniProtKB/TrEMBL;Acc:S7WDL4] | transcript_product=putative vacuolar protein sorting-associated protein 26 | location=TGGT1_chrVIIb:491007-496795(+) | protein_length=368 | sequence_SO=chromosome | SO=protein_coding_gene | is_pseudo=false	0	17.098	20	6	22	6	368	42.2	6.04	20.74	6	0.873	1.038	0.994	0.782	0.74	0.470312	0.435546	0.582612	0.179758	0.0470045	0.938747	0.878257	0.931727	0.693635	0.21402	14.51	34.25	8.18	26.48	24.67	0.873	1.294	0.795	1.278	0.704	1.038	1.052	0.994	0.871	0.663	0.782	1.184	0.74	0.634
FALSE	High	Master Protein	TGGT1_233500-t26_1-p1	transcript=TGGT1_233500-t26_1 | gene=TGGT1_233500 | organism=Toxoplasma_gondii_GT1 | gene_product=Triosephosphate isomerase [Source:UniProtKB/TrEMBL;Acc:S7V3N4] | transcript_product=triose-phosphate isomerase TPI-II | location=TGGT1_chrVIII:2678566-2683488(-) | protein_length=375 | sequence_SO=chromosome | SO=protein_coding_gene | is_pseudo=false	0	25.917	30	8	24	8	375	39.5	7.78	22.17	8	1.135	1.571	1.498	0.875	1.362	0.371688	0.0708869	0.168412	0.297971	0.167768	0.887833	0.380758	0.712867	0.850784	0.494354	6.22	9.59	6.66	15.43	7.98	1.183	0.978	1.135	0.761	1.673	1.571	0.82	1.498	1.566	1.517	0.875	0.793	1.205	1.436
FALSE	High	Master Protein	TGGT1_232830-t26_1-p1	transcript=TGGT1_232830-t26_1 | gene=TGGT1_232830 | organism=Toxoplasma_gondii_GT1 | gene_product=V-type proton ATPase subunit a [Source:UniProtKB/TrEMBL;Acc:S7WBT9] | transcript_product=putative vacuolar proton translocating ATPase subunit A | location=TGGT1_chrVIII:2275918-2280585(-) | protein_length=909 | sequence_SO=chromosome | SO=protein_coding_gene | is_pseudo=false	0	11.02	7	4	5	4	909	101.1	5.35	3.05	4	1.007	0.571	0.579	1.04	0.667	0.874965	0.372189	0.586977	0.562789	0.0428417	0.985103	0.833119	0.933745	0.940113	0.199307	35.63	16.32	6.62	41.05	28.14	0.765	1.25	1.007	2.141	0.515	0.571	1.637	0.554	0.579	0.618	1.04	1.329	1.65	0.561
FALSE	High	Master Protein	TGGT1_313080-t26_1-p1	transcript=TGGT1_313080-t26_1 | gene=TGGT1_313080 | organism=Toxoplasma_gondii_GT1 | gene_product=hypothetical protein | transcript_product=hypothetical protein | location=TGGT1_chrXI:3049384-3050751(-) | protein_length=455 | sequence_SO=chromosome | SO=protein_coding_gene | is_pseudo=false	0	11.524	12	5	7	5	455	49.5	8.69	1.81	5	0.812	0.779	0.465	1.603	1.048	0.245866	0.902157	0.323537	0.564479	0.991215	0.773786	0.974587	0.877851	0.940113	0.999418	7.19	14.57	72.3	75.32	61.29	0.431	0.812	0.854	0.779	0.709	1.062	0.294	0.465	0.907	0.789	1.603	5.285	0.615	1.048
FALSE	High	Master Protein	TGGT1_301270-t26_1-p1	transcript=TGGT1_301270-t26_1 | gene=TGGT1_301270 | organism=Toxoplasma_gondii_GT1 | gene_product=Protein kinase domain-containing protein [Source:UniProtKB/TrEMBL;Acc:S7VPW4] | transcript_product=Tyrosine kinase-like (TKL) protein | location=TGGT1_chrIV:2241797-2257616(+) | protein_length=3569 | sequence_SO=chromosome | SO=protein_coding_gene | is_pseudo=false	0	12.525	2	6	7	6	3569	385.9	5.82	3.52	6	1.102	0.805	0.757	2.631	1.675	0.477039	0.895698	0.999138	0.0576031	0.105024	0.941301	0.974587	0.999983	0.335127	0.362501	52.88	59.53	19.79	34.62	17.78	1.585	0.709	1.102	0.805	1.344	0.338	0.874	0.757	0.307	2.631	2.017	5.348	1.405	1.675
FALSE	High	Master Protein	TGGT1_288380-t26_1-p1	transcript=TGGT1_288380-t26_1 | gene=TGGT1_288380 | organism=Toxoplasma_gondii_GT1 | gene_product=HATPase_c domain-containing protein [Source:UniProtKB/TrEMBL;Acc:A0A125YVB6] | transcript_product=heat shock protein HSP90 | location=TGGT1_chrIX:2294323-2298742(+) | protein_length=708 | sequence_SO=chromosome | SO=protein_coding_gene | is_pseudo=false	0	127.666	44	34	258	34	708	81.9	5.03	339.15	34	0.912	0.77	0.703	1.331	1.018	0.65263	0.729212	0.881181	0.936445	0.780395	0.965361	0.93873	0.981008	0.992622	0.945292	15.55	48.52	21.24	52.07	75.97	0.703	1.019	0.912	1.144	0.35	0.77	0.821	0.372	0.703	0.864	1.331	2.575	1.018	0.496
FALSE	High	Master Protein	TGGT1_263050-t26_1-p1	transcript=TGGT1_263050-t26_1 | gene=TGGT1_263050 | organism=Toxoplasma_gondii_GT1 | gene_product=60S ribosomal protein L13 [Source:UniProtKB/TrEMBL;Acc:S7UXX9] | transcript_product=ribosomal protein RPL13 | location=TGGT1_chrVIIb:826699-830544(-) | protein_length=355 | sequence_SO=chromosome | SO=protein_coding_gene | is_pseudo=false	0	37.635	31	12	102	12	355	39.7	11.18	118.7	12	0.744	1.239	0.766	1.015	1.233	0.0896001	0.275924	0.981623	0.519218	0.417893	0.46061	0.774936	0.995031	0.927797	0.794043	25.24	19.19	29.9	1.22	16.73	1.369	0.744	0.636	1.399	0.883	1.239	1.776	0.638	0.766	1.007	1.015	1.024	1.372	0.912
FALSE	High	Master Protein	TGGT1_233140-t26_1-p1	transcript=TGGT1_233140-t26_1 | gene=TGGT1_233140 | organism=Toxoplasma_gondii_GT1 | gene_product=Deoxyuridine 5'-triphosphate nucleotidohydrolase [Source:UniProtKB/TrEMBL;Acc:S7WJC8] | transcript_product=putative deoxyuridine 5'-triphosphate nucleotidohydrolase | location=TGGT1_chrVIII:2445123-2446378(-) | protein_length=170 | sequence_SO=chromosome | SO=protein_coding_gene | is_pseudo=false	0	8.314	18	3	13	3	170	18.2	6.2	9.81	3	0.78	0.516	0.339	1.887	0.905	0.158138	0.247549	0.104522	0.312389	0.409449	0.623959	0.738772	0.545165	0.862766	0.786731	36.6	64.76	59.17	16.66	146.92	0.47	1.035	0.78	0.516	0.103	0.916	0.339	0.101	0.564	1.675	1.887	100	0.905	0.189
FALSE	High	Master Protein	TGGT1_223760-t26_1-p1	transcript=TGGT1_223760-t26_1 | gene=TGGT1_223760 | organism=Toxoplasma_gondii_GT1 | gene_product=hypothetical protein | transcript_product=hypothetical protein | location=TGGT1_chrX:3506110-3512843(-) | protein_length=1588 | sequence_SO=chromosome | SO=protein_coding_gene | is_pseudo=false	0	26.513	8	10	15	10	1588	168.9	6.6	14.78	10	1.053	0.568	0.599	1.996	1.421	0.664791	0.205851	0.634767	0.245892	0.105384	0.969107	0.691187	0.941318	0.803658	0.363012	5.26	10.95	31.68	31.2	45.83	1.053	1.016	1.19	0.613	0.568	0.513	0.763	0.493	0.599	1.532	2.416	1.996	0.968	1.861
FALSE	High	Master Protein	TGGT1_271888-t26_1-p1	transcript=TGGT1_271888-t26_1 | gene=TGGT1_271888 | organism=Toxoplasma_gondii_GT1 | gene_product=Putative 3-ketoacyl-CoA reductase [Source:UniProtKB/TrEMBL;Acc:A0A125YR36] | transcript_product=putative 3-ketoacyl-CoA reductase | location=TGGT1_chrVIII:4294988-4299861(-) | protein_length=342 | sequence_SO=chromosome | SO=protein_coding_gene | is_pseudo=false	0	18.098	20	6	19	6	342	37.5	9.26	12.87	6	0.866	1.097	1.253	1.06	1.247	0.444051	0.444871	0.309794	0.597427	0.380581	0.924143	0.882541	0.874546	0.942063	0.762053	22.62	2.88	3.71	30.24	26.16	0.613	0.866	1.022	1.075	1.447	1.097	0.688	1.253	1.284	0.844	1.06	1.343	0.834	1.247
FALSE	High	Master Protein	TGGT1_311240-t26_1-p1	transcript=TGGT1_311240-t26_1 | gene=TGGT1_311240 | organism=Toxoplasma_gondii_GT1 | gene_product=Putative DnaJ family chaperone [Source:UniProtKB/TrEMBL;Acc:S7UT35] | transcript_product=putative DnaJ family chaperone | location=TGGT1_chrXI:1865804-1870827(-) | protein_length=426 | sequence_SO=chromosome | SO=protein_coding_gene | is_pseudo=false	0	17.983	19	6	19	6	426	47.4	6.84	9.92	6	0.719	0.675	0.5	1.526	0.834	0.0560462	0.659841	0.401217	0.656946	0.173826	0.338139	0.927717	0.901174	0.959529	0.505431	9.33	4.84	0.51	23.24	124.98	0.676	0.952	0.719	0.675	0.213	0.698	0.5	0.239	0.502	1.287	1.526	5.861	0.834	0.345
FALSE	High	Master Protein	TGGT1_305860-t26_1-p1	transcript=TGGT1_305860-t26_1 | gene=TGGT1_305860 | organism=Toxoplasma_gondii_GT1 | gene_product=Calcium-dependent protein kinase CDPK3 [Source:UniProtKB/TrEMBL;Acc:A0A125YQG3] | transcript_product=calcium-dependent protein kinase CDPK3 | location=TGGT1_chrIX:5409701-5417293(+) | protein_length=537 | sequence_SO=chromosome | SO=protein_coding_gene | is_pseudo=false	0	13.653	7	5	19	2	537	60.4	6.4	7.64	5	0.82	0.522	0.473	1.234	1.415	0.271591	0.2457	0.341914	0.901601	0.322775	0.800707	0.738772	0.884953	0.986691	0.70482	27.3	16.42	45.56	38.22	80.75	0.82	0.693	1.006	1.021	0.522	0.47	0.838	0.362	0.473	0.916	1.234	5.328	1.415	0.644
FALSE	Low	Master Protein	TGGT1_222270-t26_1-p1	transcript=TGGT1_222270-t26_1 | gene=TGGT1_222270 | organism=Toxoplasma_gondii_GT1 | gene_product=hypothetical protein | transcript_product=hypothetical protein | location=TGGT1_chrII:987896-990436(+) | protein_length=387 | sequence_SO=chromosome | SO=protein_coding_gene | is_pseudo=false	0.053	1.734	5	1	1	1	387	41.6	6.79	0	1	3.099	100	100	1.465	100	1.70308e-12	1e-17	1e-17	0.738255	1e-17	2.86799e-11	1.60374e-16	1.34062e-16	0.969165	1.03758e-16	0	0	0	0	0			3.099	100	100	0.01	100	100	0.01			1.465	100	100
FALSE	High	Master Protein	TGGT1_266800-t26_1-p1	transcript=TGGT1_266800-t26_1 | gene=TGGT1_266800 | organism=Toxoplasma_gondii_GT1 | gene_product=Putative integral membrane protein [Source:UniProtKB/TrEMBL;Acc:A0A125YL80] | transcript_product=putative integral membrane protein | location=TGGT1_chrIX:795711-800177(+) | protein_length=302 | sequence_SO=chromosome | SO=protein_coding_gene | is_pseudo=false	0	6.272	8	3	5	3	302	32.5	5.01	0	3	1.012	0.858	0.863	1.137	1.042	0.851625	0.714276	0.792274	0.733332	0.993495	0.985103	0.933509	0.972757	0.969165	0.999418	5.58	31.46	5.6	21.01	3.12	1.012	1.05	0.83	1.09	0.7	0.858	0.897	0.863	0.809	0.976	1.137	1.327	1.064	0.98
FALSE	High	Master Protein	TGGT1_232440-t26_1-p1	transcript=TGGT1_232440-t26_1 | gene=TGGT1_232440 | organism=Toxoplasma_gondii_GT1 | gene_product=Brf1p family coiled coil protein [Source:UniProtKB/TrEMBL;Acc:A0A125YMJ3] | transcript_product=Brf1p family coiled coil protein | location=TGGT1_chrVIII:2091405-2096025(+) | protein_length=468 | sequence_SO=chromosome | SO=protein_coding_gene | is_pseudo=false	0	23.729	22	11	48	11	468	54	6.62	28.33	11	0.784	0.89	0.698	1.589	0.932	0.166917	0.927581	0.869038	0.581139	0.435988	0.640291	0.977578	0.981008	0.940113	0.80811	1.36	12.38	8.92	51.39	106.04	0.776	1.062	0.784	0.89	0.294	0.971	0.698	0.292	0.743	1.038	1.589	3.574	0.932	0.369
FALSE	High	Master Protein	TGGT1_273050-t26_1-p1	transcript=TGGT1_273050-t26_1 | gene=TGGT1_273050 | organism=Toxoplasma_gondii_GT1 | gene_product=hypothetical protein | transcript_product=hypothetical protein | location=TGGT1_chrVIII:3689301-3691684(-) | protein_length=642 | sequence_SO=chromosome | SO=protein_coding_gene | is_pseudo=false	0	53.002	32	16	39	16	642	71	9.39	33.35	16	1.022	1.779	1.606	0.655	1.205	0.80436	0.0291805	0.129104	0.0696525	0.495522	0.985103	0.199497	0.612948	0.396398	0.847237	14.07	14.17	5.22	4.93	8.72	1.119	0.913	1.022	1.112	1.779	1.949	1.55	1.606	1.808	1.117	0.655	0.634	1.683	1.134
FALSE	High	Master Protein	TGGT1_232520-t26_1-p1	transcript=TGGT1_232520-t26_1 | gene=TGGT1_232520 | organism=Toxoplasma_gondii_GT1 | gene_product=Brix domain-containing protein [Source:UniProtKB/TrEMBL;Acc:A0A125YQE1] | transcript_product=brix domain-containing protein | location=TGGT1_chrVIII:2131005-2132727(-) | protein_length=401 | sequence_SO=chromosome | SO=protein_coding_gene | is_pseudo=false	0	10.098	12	4	7	4	401	43.2	10.04	3.88	4	0.824	0.924	0.748	1.148	1.082	0.284558	0.578816	0.980739	0.751131	0.912851	0.812195	0.91465	0.995031	0.971965	0.978711	2.2	2.67	6.85	2.96	27.5	0.824	0.837	0.716	0.908	0.924	1.167	0.748	0.613	0.785	0.707	1.17	1.148	0.881	1.082
FALSE	High	Master Protein	TGGT1_230420-t26_1-p1	transcript=TGGT1_230420-t26_1 | gene=TGGT1_230420 | organism=Toxoplasma_gondii_GT1 | gene_product=Cation_ATPase_N domain-containing protein [Source:UniProtKB/TrEMBL;Acc:A0A125YSA2] | transcript_product=sarco/endoplasmic reticulum Ca2+-ATPase | location=TGGT1_chrVIII:760295-772731(+) | protein_length=1093 | sequence_SO=chromosome | SO=protein_coding_gene | is_pseudo=false	0	38.094	14	14	40	14	1093	118.8	5.43	25.09	14	0.983	0.947	0.821	1.318	1.223	0.990155	0.780487	0.871419	0.958253	0.444213	0.998575	0.943561	0.981008	0.995636	0.814998	19.71	15.73	6.56	27.27	7.31	0.745	0.983	1.134	1.059	0.947	0.701	0.786	1.13	0.821	1.075	1.318	2.348	1.163	1.223
FALSE	Medium	Master Protein	TGGT1_294820-t26_1-p1	transcript=TGGT1_294820-t26_1 | gene=TGGT1_294820 | organism=Toxoplasma_gondii_GT1 | gene_product=Putative type I fatty acid synthase [Source:UniProtKB/TrEMBL;Acc:A0A125YWR8] | transcript_product=putative type I fatty acid synthase | location=TGGT1_chrIa:1146964-1183005(+) | protein_length=10021 | sequence_SO=chromosome | SO=protein_coding_gene | is_pseudo=false	0.023	2.186	0	1	7	1	10021	1092.8	6.38	1.66	1	0.899	0.507	0.124	1.36	0.317	0.589034	0.245755	0.000253104	0.890759	2.26922e-08	0.956627	0.738772	0.00258528	0.986633	1.79856e-07	77.65	66.26	13.93	73.51	19.6	0.123	0.899	1.887	0.917	0.138	0.507	0.113	0.124	0.957	1.36	2.035	0.625	1.248	0.28
FALSE	High	Master Protein	TGGT1_305270-t26_1-p1	transcript=TGGT1_305270-t26_1 | gene=TGGT1_305270 | organism=Toxoplasma_gondii_GT1 | gene_product=hypothetical protein | transcript_product=hypothetical protein | location=TGGT1_chrIX:5105581-5110076(+) | protein_length=738 | sequence_SO=chromosome | SO=protein_coding_gene | is_pseudo=false	0	11.402	5	4	7	4	738	82.3	8.87	5.11	4	1.048	1.002	1.004	1.126	0.81	0.685573	0.503735	0.568851	0.713077	0.285395	0.969375	0.909352	0.926406	0.96852	0.657598	22.11	32.16	6.78	35.89	54.54	1.048	0.824	1.205	1.002	1.219	0.445	1.05	1.004	0.751	0.809	1.126	1.399	0.81	1.373
FALSE	High	Master Protein	TGGT1_200450-t26_1-p1	transcript=TGGT1_200450-t26_1 | gene=TGGT1_200450 | organism=Toxoplasma_gondii_GT1 | gene_product=hypothetical protein | transcript_product=hypothetical protein | location=TGGT1_chrVIII:6865971-6873462(-) | protein_length=1317 | sequence_SO=chromosome | SO=protein_coding_gene | is_pseudo=false	0	9.875	3	3	3	3	1317	144.4	8.29	3.19	3	1.151	1.923	1.796	0.79	1.724	0.32745	0.0257536	0.0813855	0.188991	0.183132	0.85892	0.17892	0.471114	0.715489	0.5208	53.45	39.73	7.43	17.24	0.19	1.151	1.68	0.736	1.923	1.015	2.439	2.214	1.706	1.796	0.896	0.79	0.708	1.724	0.802
FALSE	High	Master Protein	TGGT1_223050-t26_1-p1	transcript=TGGT1_223050-t26_1 | gene=TGGT1_223050 | organism=Toxoplasma_gondii_GT1 | gene_product=Ribosomal_S10 domain-containing protein [Source:UniProtKB/TrEMBL;Acc:S7UL41] | transcript_product=ribosomal protein RPS20 | location=TGGT1_chrII:1366681-1368519(+) | protein_length=233 | sequence_SO=chromosome | SO=protein_coding_gene | is_pseudo=false	0	18.177	23	6	42	6	233	25.8	9.52	39.59	6	1.086	0.882	0.962	0.908	0.914	0.533628	0.948609	0.629783	0.34648	0.372568	0.942037	0.985607	0.938114	0.86944	0.754572	19.29	5.75	8.02	5.24	21.69	0.74	1.086	1.227	1.158	0.849	0.882	0.912	0.962	1.167	0.877	0.908	1.614	0.914	0.797
FALSE	High	Master Protein	TGGT1_253940-t26_1-p1	transcript=TGGT1_253940-t26_1 | gene=TGGT1_253940 | organism=Toxoplasma_gondii_GT1 | gene_product=Protein kinase domain-containing protein [Source:UniProtKB/TrEMBL;Acc:S7UMP4] | transcript_product=CAM Kinase family, incomplete catalytic triad | location=TGGT1_chrIII:1334859-1341615(-) | protein_length=567 | sequence_SO=chromosome | SO=protein_coding_gene | is_pseudo=false	0.006	3.23	3	1	1	1	567	64.4	9.72	0	1	1	1	1	100	100	0.908389	0.505019	0.574836	1e-17	1e-17	0.985103	0.909352	0.926406	1.03865e-16	1.03758e-16	7412.26	7412.26	7412.26	0	0	0.01		100		100	0.01	0.01	100				100		100
FALSE	Medium	Master Protein	TGGT1_313360-t26_1-p1	transcript=TGGT1_313360-t26_1 | gene=TGGT1_313360 | organism=Toxoplasma_gondii_GT1 | gene_product=hypothetical protein | transcript_product=hypothetical protein | location=TGGT1_chrXI:3271727-3276184(+) | protein_length=1485 | sequence_SO=chromosome | SO=protein_coding_gene | is_pseudo=false	0.05	1.754	1	1	2	1	1485	156.1	8.41	0	1	0.724	0.905	0.656	0.737	0.364	0.0621904	0.603474	0.77049	0.133846	4.88272e-07	0.357435	0.91465	0.972757	0.608504	3.78245e-06	8.32	39.48	21.2	82.72	67.26	0.724	0.767	0.62	0.905	0.01	1.234	0.656	0.01	0.765	0.737	1.667	0.295	0.667	0.01
FALSE	Medium	Master Protein	TGGT1_286610-t26_1-p1	transcript=TGGT1_286610-t26_1 | gene=TGGT1_286610 | organism=Toxoplasma_gondii_GT1 | gene_product=Putative ribosomal protein RPS14 [Source:UniProtKB/TrEMBL;Acc:S7UN74] | transcript_product=putative ribosomal protein RPS14 | location=TGGT1_chrV:1618356-1619717(+) | protein_length=318 | sequence_SO=chromosome | SO=protein_coding_gene | is_pseudo=false	0.032	2.034	3	1	1	1	318	36.5	10.48	0	1	0.796	1.466	0.837	100	10.466	0.199003	0.156088	0.84098	1e-17	2.02127e-10	0.699627	0.614329	0.975299	1.03865e-16	1.70464e-09	58.57	6.11	46.19	0	700.54	1.589	0.796	0.571	0.01	1.526	1.466	0.01	1.215	0.837	100	0.718	100		1.095
FALSE	High	Master Protein	TGGT1_223910-t26_1-p1	transcript=TGGT1_223910-t26_1 | gene=TGGT1_223910 | organism=Toxoplasma_gondii_GT1 | gene_product=PlsC domain-containing protein [Source:UniProtKB/TrEMBL;Acc:A0A125YKZ9] | transcript_product=acyltransferase domain-containing protein | location=TGGT1_chrX:3371597-3378120(-) | protein_length=388 | sequence_SO=chromosome | SO=protein_coding_gene | is_pseudo=false	0	11.995	12	4	20	4	388	44	9.23	11.39	4	0.948	0.867	0.945	1.083	0.917	0.833447	0.778092	0.65447	0.637709	0.392051	0.985103	0.943561	0.941345	0.950029	0.773261	10.64	3.25	2.97	32.15	21.32	0.885	0.948	1.17	1.189	0.867	0.849	0.945	0.9	0.965	0.848	1.083	1.401	0.802	0.917
FALSE	High	Master Protein	TGGT1_252430-t26_1-p1	transcript=TGGT1_252430-t26_1 | gene=TGGT1_252430 | organism=Toxoplasma_gondii_GT1 | gene_product=hypothetical protein | transcript_product=hypothetical protein | location=TGGT1_chrIII:551384-554261(+) | protein_length=767 | sequence_SO=chromosome | SO=protein_coding_gene | is_pseudo=false	0	7.398	6	3	6	3	767	83.8	6.15	4.29	3	1.025	0.525	0.6	1.756	0.921	0.789158	0.311985	0.63876	0.413135	0.552725	0.980769	0.798919	0.941318	0.905347	0.86452	3.87	53.95	40.18	30.68	99.82	1.144	1.025	0.998	0.525	0.272	0.825	0.6	0.279	0.823	1.756	1.392	3.418	0.921	0.379
FALSE	High	Master Protein	TGGT1_254940-t26_1-p1	transcript=TGGT1_254940-t26_1 | gene=TGGT1_254940 | organism=Toxoplasma_gondii_GT1 | gene_product=MI domain-containing protein [Source:UniProtKB/TrEMBL;Acc:S7W271] | transcript_product=MIF4G domain-containing protein | location=TGGT1_chrIII:2027943-2043635(+) | protein_length=3756 | sequence_SO=chromosome | SO=protein_coding_gene | is_pseudo=false	0	20.876	3	9	20	9	3756	384.6	6.87	2.22	9	1.144	0.654	0.608	1.864	1.12	0.348199	0.636526	0.658176	0.328023	0.791158	0.87471	0.922967	0.941345	0.86944	0.947343	0.06	12.22	33.58	15.44	6.47	1.144	0.912	1.144	0.654	0.713	0.492	0.787	0.608	0.493	1.67	1.864	2.3	1.071	1.179
FALSE	High	Master Protein	TGGT1_283710-t26_1-p1	transcript=TGGT1_283710-t26_1 | gene=TGGT1_283710 | organism=Toxoplasma_gondii_GT1 | gene_product=TLC domain-containing protein [Source:UniProtKB/TrEMBL;Acc:A0A125YW31] | transcript_product=longevity-assurance protein (LAG1) domain-containing protein | location=TGGT1_chrV:2855033-2858762(-) | protein_length=342 | sequence_SO=chromosome | SO=protein_coding_gene | is_pseudo=false	0	7.236	7	3	12	3	342	39.5	8.63	3.5	3	1.005	0.919	0.85	1.171	1.288	0.882689	0.749504	0.816766	0.793331	0.288917	0.985103	0.943561	0.973927	0.973268	0.660023	4.48	7.27	2	12.28	29.51	0.879	1.036	1.005	0.967	0.776	0.919	0.85	0.838	0.924	1.074	1.171	1.838	1.288	1.032
FALSE	High	Master Protein	TGGT1_254480-t26_1-p1	transcript=TGGT1_254480-t26_1 | gene=TGGT1_254480 | organism=Toxoplasma_gondii_GT1 | gene_product=WD domain, G-beta repeat-containing protein [Source:UniProtKB/TrEMBL;Acc:S7UMW1] | transcript_product=WD domain, G-beta repeat-containing protein | location=TGGT1_chrIII:1745233-1748585(-) | protein_length=816 | sequence_SO=chromosome | SO=protein_coding_gene | is_pseudo=false	0.008	2.919	2	1	1	1	816	86.8	5.6	0	1	1.477	0.339	0.503	100	100	0.0120567	0.0404724	0.408605	1e-17	1e-17	0.114065	0.260115	0.901174	1.03865e-16	1.03758e-16	3.32	3.84	147.51	0	0	1.444	1.477	100	0.348	0.082	0.339	0.503	0.121	100	100	4.484	100	100	0.368
FALSE	High	Master Protein	TGGT1_210370-t26_1-p1	transcript=TGGT1_210370-t26_1 | gene=TGGT1_210370 | organism=Toxoplasma_gondii_GT1 | gene_product=hypothetical protein | transcript_product=hypothetical protein | location=TGGT1_chrIX:4634440-4635879(-) | protein_length=479 | sequence_SO=chromosome | SO=protein_coding_gene | is_pseudo=false	0	35.39	27	10	30	10	479	52.4	9.14	27.96	10	1.128	1.212	1.253	1.267	1.42	0.392359	0.303288	0.309679	0.957139	0.11755	0.904958	0.793558	0.874546	0.995636	0.386577	15.02	26.13	41.51	6.28	8.23	1.242	0.871	1.128	1.212	1.426	0.885	1.253	1.603	0.835	1.32	0.945	1.267	1.092	1.42
FALSE	High	Master Protein	TGGT1_204380-t26_1-p1	transcript=TGGT1_204380-t26_1 | gene=TGGT1_204380 | organism=Toxoplasma_gondii_GT1 | gene_product=hypothetical protein | transcript_product=hypothetical protein | location=TGGT1_chrVIIa:1732949-1745124(-) | protein_length=3226 | sequence_SO=chromosome | SO=protein_coding_gene | is_pseudo=false	0	17.795	3	7	7	7	3226	348.3	5.55	4.43	7	0.875	0.933	0.817	1.102	1.464	0.482918	0.602053	0.879373	0.67143	0.0906349	0.941301	0.91465	0.981008	0.964904	0.329845	22.35	13.13	10.94	54.87	30.5	0.875	0.761	1.352	0.933	1.341	0.857	0.817	0.76	1.159	1.544	1.102	0.694	1.464	1.98
FALSE	Medium	Master Protein	TGGT1_257750-t26_1-p1	transcript=TGGT1_257750-t26_1 | gene=TGGT1_257750 | organism=Toxoplasma_gondii_GT1 | gene_product=Hcy-binding domain-containing protein [Source:UniProtKB/TrEMBL;Acc:S7UZC0] | transcript_product=homocysteine s-methyltransferase domain-containing protein | location=TGGT1_chrVIIb:3785581-3789978(+) | protein_length=434 | sequence_SO=chromosome | SO=protein_coding_gene | is_pseudo=false	0.038	1.871	6	1	1	1	434	46.5	5.91	0	1	2.69	0.01	0.059	100	100	6.10096e-10	1e-17	2.5683e-07	1e-17	1e-17	1.01723e-08	1.60374e-16	3.06056e-06	1.03865e-16	1.03758e-16	147.71	0	424.95	0	0	100	0.01	2.69	0.01	100	0.01		0.348	0.01	100		100		100
FALSE	Medium	Master Protein	TGGT1_230230-t26_1-p1	transcript=TGGT1_230230-t26_1 | gene=TGGT1_230230 | organism=Toxoplasma_gondii_GT1 | gene_product=Fip1 domain-containing protein [Source:UniProtKB/TrEMBL;Acc:S7V2Z0] | transcript_product=hypothetical protein | location=TGGT1_chrVIII:704875-707839(+) | protein_length=280 | sequence_SO=chromosome | SO=protein_coding_gene | is_pseudo=false	0.037	1.883	5	1	1	1	280	29.8	5.14	0	1	1.263	0.01	0.01	100	100	0.121908	1e-17	1e-17	1e-17	1e-17	0.55786	1.60374e-16	1.34062e-16	1.03865e-16	1.03758e-16	20.79	0	0	0	0	0.963	1.44	1.263	0.01	0.01	0.704	0.01	0.01	0.888	100	100	100
FALSE	High	Master Protein	TGGT1_223485-t26_1-p1	transcript=TGGT1_223485-t26_1 | gene=TGGT1_223485 | organism=Toxoplasma_gondii_GT1 | gene_product=hypothetical protein | transcript_product=hypothetical protein | location=TGGT1_chrX:3690054-3691863(+) | protein_length=93 | sequence_SO=chromosome | SO=protein_coding_gene | is_pseudo=false	0.005	3.375	13	1	3	1	93	10.3	9.58	0	1	1.497	0.67	1.003	1.587	1.063	0.00955907	0.72812	0.570659	0.583221	0.935817	0.093049	0.93859	0.926406	0.940113	0.984886	87.11	42.93	42.15	47.71	70.29	0.617	100	1.497	1.163	0.52	0.67	0.718	100	1.003	100	1.076	1.587	100	0.559
FALSE	High	Master Protein	TGGT1_208540-t26_1-p1	transcript=TGGT1_208540-t26_1 | gene=TGGT1_208540 | organism=Toxoplasma_gondii_GT1 | gene_product=ATP-dependent RNA helicase [Source:UniProtKB/TrEMBL;Acc:S7UIN9] | transcript_product=DEAD/DEAH box helicase domain-containing protein | location=TGGT1_chrIb:780886-788568(+) | protein_length=1043 | sequence_SO=chromosome | SO=protein_coding_gene | is_pseudo=false	0	29.898	12	11	27	10	1043	114.4	9.69	17.02	11	1.007	0.924	1.164	1.059	0.839	0.872626	0.660107	0.385381	0.594757	0.179861	0.985103	0.927717	0.898096	0.942063	0.513202	12.86	6.29	38.21	2.97	9.36	1.426	0.92	1.007	0.887	0.924	1.033	1.505	1.164	0.864	1.038	1.059	1.211	0.789	0.839
FALSE	High	Master Protein	TGGT1_224540A-t26_1-p1	transcript=TGGT1_224540A-t26_1 | gene=TGGT1_224540A | organism=Toxoplasma_gondii_GT1 | gene_product=hypothetical protein | transcript_product=hypothetical protein | location=TGGT1_chrX:2888436-2898941(-) | protein_length=2106 | sequence_SO=chromosome | SO=protein_coding_gene | is_pseudo=false	0	114.614	23	36	97	33	2106	222.5	6.38	85.02	36	1.189	1.133	1.336	0.877	1.214	0.238342	0.412216	0.251724	0.301338	0.468772	0.76161	0.865097	0.830689	0.850784	0.831646	29.33	13.34	18.14	8.89	14.19	1.448	0.954	1.189	1.031	1.534	1.133	1.545	1.336	1.173	1.286	0.828	0.877	1.33	1.214
FALSE	High	Master Protein	TGGT1_294790-t26_1-p1	transcript=TGGT1_294790-t26_1 | gene=TGGT1_294790 | organism=Toxoplasma_gondii_GT1 | gene_product=hypothetical protein | transcript_product=hypothetical protein | location=TGGT1_chrIa:1130567-1131622(-) | protein_length=351 | sequence_SO=chromosome | SO=protein_coding_gene | is_pseudo=false	0	24.196	23	6	26	6	351	37.7	4.78	50.18	6	0.968	0.84	0.763	1.568	1.065	0.930393	0.999127	0.987158	0.60524	0.987858	0.985398	0.999207	0.996449	0.943528	0.998944	8.8	48.74	40.42	13.25	1.93	0.968	1.05	0.913	0.623	1.251	0.84	0.6	1.437	0.763	1.708	1.017	1.568	1.065	1.492
FALSE	High	Master Protein	TGGT1_207920-t26_1-p1	transcript=TGGT1_207920-t26_1 | gene=TGGT1_207920 | organism=Toxoplasma_gondii_GT1 | gene_product=hypothetical protein | transcript_product=hypothetical protein | location=TGGT1_chrIb:453863-457810(+) | protein_length=726 | sequence_SO=chromosome | SO=protein_coding_gene | is_pseudo=false	0	16.85	10	6	11	6	726	80.4	8.4	6.66	6	1.242	0.814	0.883	1.685	0.982	0.148907	0.795261	0.756645	0.478393	0.763952	0.61012	0.946371	0.972757	0.915333	0.940377	6.54	23.25	29.12	9.81	25.85	1.242	1.296	0.892	0.624	0.814	0.965	0.883	1.196	0.738	1.797	1.685	1.282	0.836	1.351
FALSE	High	Master Protein	TGGT1_232130-t26_1-p1	transcript=TGGT1_232130-t26_1 | gene=TGGT1_232130 | organism=Toxoplasma_gondii_GT1 | gene_product=hypothetical protein | transcript_product=hypothetical protein | location=TGGT1_chrVIII:1876792-1879382(+) | protein_length=456 | sequence_SO=chromosome | SO=protein_coding_gene | is_pseudo=false	0	42.982	40	13	76	13	456	48.8	9.91	65.93	13	0.884	0.801	0.787	1.001	1.045	0.521888	0.820002	0.937351	0.49535	0.896839	0.942037	0.950701	0.993783	0.915333	0.9753	3.24	7.02	6.62	21.36	32.19	0.865	0.96	0.884	1.024	0.801	0.764	0.707	0.824	0.787	1.001	0.857	1.768	1.045	0.767
FALSE	High	Master Protein	TGGT1_205350-t26_1-p1	transcript=TGGT1_205350-t26_1 | gene=TGGT1_205350 | organism=Toxoplasma_gondii_GT1 | gene_product=Elongation of fatty acids protein [Source:UniProtKB/TrEMBL;Acc:A0A125YTU7] | transcript_product=putative integral membrane protein, GNS1/SUR4 family protein | location=TGGT1_chrVIIa:1373006-1374809(-) | protein_length=318 | sequence_SO=chromosome | SO=protein_coding_gene | is_pseudo=false	0	9.225	14	3	5	3	318	37.8	9.03	0	3	1.142	0.422	0.482	0.708	0.475	0.351708	0.0309219	0.361943	0.107765	4.0977e-06	0.87471	0.208086	0.89526	0.52277	3.05011e-05	8.68	15.43	118.49	18.9	55.09	1.209	0.837	1.142	2.478	0.382	0.422	2.402	0.248	0.482	0.547	0.811	0.708	0.756	0.475
FALSE	High	Master Protein	TGGT1_308860-t26_1-p1	transcript=TGGT1_308860-t26_1 | gene=TGGT1_308860 | organism=Toxoplasma_gondii_GT1 | gene_product=hypothetical protein | transcript_product=hypothetical protein | location=TGGT1_chrXI:267813-271388(-) | protein_length=654 | sequence_SO=chromosome | SO=protein_coding_gene | is_pseudo=false	0	144.833	49	27	220	27	654	69.5	10.01	465.26	27	0.948	1.028	1.521	1.021	1.307	0.830228	0.598724	0.159096	0.530028	0.253102	0.985103	0.91465	0.697733	0.934143	0.623468	18.64	0.16	5.15	13.74	32.6	1.671	0.842	0.948	1.028	1.731	1.027	1.574	1.521	0.853	1.353	0.927	1.021	1.307	1.594
FALSE	High	Master Protein	TGGT1_270240-t26_1-p1	transcript=TGGT1_270240-t26_1 | gene=TGGT1_270240 | organism=Toxoplasma_gondii_GT1 | gene_product=MAG1 protein [Source:UniProtKB/TrEMBL;Acc:S7V482] | transcript_product=MAG1 protein | location=TGGT1_chrVIII:5310162-5311630(+) | protein_length=452 | sequence_SO=chromosome | SO=protein_coding_gene | is_pseudo=false	0	36.473	29	12	29	12	452	49.2	4.96	16.41	12	0.974	0.656	0.846	1.002	0.584	0.962209	0.406816	0.822967	0.497312	0.000588005	0.990122	0.865097	0.973927	0.915333	0.00396325	11.89	9.64	26.02	50.68	12.64	0.851	0.974	1.059	0.616	1.391	0.656	0.846	1.193	0.72	0.66	1.555	1.002	0.584	1.92
FALSE	High	Master Protein	TGGT1_257680-t26_1-p1	transcript=TGGT1_257680-t26_1 | gene=TGGT1_257680 | organism=Toxoplasma_gondii_GT1 | gene_product=EF-hand domain-containing protein [Source:UniProtKB/TrEMBL;Acc:A0A125YYD3] | transcript_product=myosin light chain MLC1 | location=TGGT1_chrVIIb:3843366-3845688(+) | protein_length=213 | sequence_SO=chromosome | SO=protein_coding_gene | is_pseudo=false	0	41.346	59	8	49	8	213	24.1	4.65	94.77	8	0.885	0.951	0.672	1.089	1.096	0.525548	0.769251	0.809795	0.64719	0.884619	0.942037	0.943561	0.973927	0.956102	0.973935	11.35	7.7	28.17	7.76	13.04	0.662	0.958	0.885	0.904	0.951	1.223	0.565	0.672	1.098	1.089	1.032	2.375	1	1.096
FALSE	Medium	Master Protein	TGGT1_293430-t26_1-p1	transcript=TGGT1_293430-t26_1 | gene=TGGT1_293430 | organism=Toxoplasma_gondii_GT1 | gene_product=hypothetical protein | transcript_product=hypothetical protein | location=TGGT1_chrIa:302881-304116(-) | protein_length=411 | sequence_SO=chromosome | SO=protein_coding_gene | is_pseudo=false	0.027	2.128	3	1	2	1	411	44.6	5.14	0	1	0.973	0.6	0.43	1.879	1.128	0.95688	0.509217	0.253113	0.317617	0.956832	0.989188	0.911564	0.832073	0.863411	0.990916	20.77	16.02	32.36	38.49	78.77	0.588	1.131	0.973	0.6	0.38	0.673	0.353	0.43	0.655	1.879	1.391	100	1.128	0.529
FALSE	High	Master Protein	TGGT1_216670-t26_1-p1	transcript=TGGT1_216670-t26_1 | gene=TGGT1_216670 | organism=Toxoplasma_gondii_GT1 | gene_product=FUSE-binding protein 2 / KH-type splicing regulatory protein [Source:UniProtKB/TrEMBL;Acc:S7VUJ0] | transcript_product=FUSE-binding protein 2 / KH-type splicing regulatory protein | location=TGGT1_chrXI:5891708-5895741(-) | protein_length=941 | sequence_SO=chromosome | SO=protein_coding_gene | is_pse…	0	55.263	26	20	71	20	941	100	8.95	59.91	20	0.842	0.597	0.608	1.514	0.858	0.345806	0.266168	0.6564	0.672474	0.21161	0.87471	0.76893	0.941345	0.964904	0.567832	15.42	42.65	15.99	61.05	47.06	0.762	1.033	0.842	0.838	0.39	0.597	0.681	0.407	0.608	0.891	1.514	2.465	0.858	0.651
FALSE	High	Master Protein	TGGT1_273370-t26_1-p1	transcript=TGGT1_273370-t26_1 | gene=TGGT1_273370 | organism=Toxoplasma_gondii_GT1 | gene_product=Coatomer subunit gamma [Source:UniProtKB/TrEMBL;Acc:S7V3E5] | transcript_product=putative coatomer gamma 2-subunit protein | location=TGGT1_chrVIII:3554530-3558659(-) | protein_length=1044 | sequence_SO=chromosome | SO=protein_coding_gene | is_pseudo=false	0	10.564	6	5	8	5	1044	112.2	5.35	3.78	5	0.932	0.598	0.584	1.763	1.289	0.750066	0.504484	0.600639	0.406889	0.344453	0.973495	0.909352	0.93387	0.905209	0.728867	30.25	0.98	16.03	9.91	10.9	0.715	0.932	1.171	0.598	0.59	0.602	0.45	0.655	0.584	1.881	1.625	1.763	1.384	0.876
FALSE	High	Master Protein	TGGT1_411430-t26_1-p1	transcript=TGGT1_411430-t26_1 | gene=TGGT1_411430 | organism=Toxoplasma_gondii_GT1 | gene_product=Protein kinase domain-containing protein [Source:UniProtKB/TrEMBL;Acc:S7UG16] | transcript_product=rhoptry protein ROP5 | location=AAQM03000489:189-1624(+) | protein_length=461 | sequence_SO=contig | SO=protein_coding_gene | is_pseudo=false	0	110.908	45	21	236	7	461	51.5	10.56	391.34	21	1.027	0.95	0.97	1.171	0.952	0.782506	0.771803	0.616961	0.793302	0.51038	0.979507	0.943561	0.93387	0.973268	0.850798	9.62	28.68	5.85	16.88	4.18	1.093	0.907	1.027	0.95	1.332	0.796	0.97	1.208	0.934	1.038	1.171	1.598	0.952	1.422
FALSE	Medium	Master Protein	TGGT1_237015-t26_1-p1	transcript=TGGT1_237015-t26_1 | gene=TGGT1_237015 | organism=Toxoplasma_gondii_GT1 | gene_product=hypothetical protein | transcript_product=hypothetical protein | location=TGGT1_chrX:5566838-5567632(-) | protein_length=264 | sequence_SO=chromosome | SO=protein_coding_gene | is_pseudo=false	0.014	2.475	5	1	1	1	264	29.3	8.73	0	1	11.4	0.08	1	14.496	1.344	1e-17	2.78616e-08	0.574836	1.08236e-10	0.600752	1.73608e-16	3.67773e-07	0.926406	1.02371e-09	0.887232	641.8	583.6	7412.26	500.65	0		100	1.3		0.64	0.01		100	0.01		2.101	100		1.344
FALSE	High	Master Protein	TGGT1_283780-t26_1-p1	transcript=TGGT1_283780-t26_1 | gene=TGGT1_283780 | organism=Toxoplasma_gondii_GT1 | gene_product=Glucose-6-phosphate isomerase [Source:UniProtKB/TrEMBL;Acc:S7W2U8] | transcript_product=glucose-6-phosphate isomerase GPI | location=TGGT1_chrV:2809762-2819876(-) | protein_length=661 | sequence_SO=chromosome | SO=protein_coding_gene | is_pseudo=false	0	13.462	10	5	14	5	661	74.4	8.46	8.39	5	1.254	0.299	0.355	2.492	0.988	0.132965	0.00799594	0.1262	0.0794718	0.795523	0.585639	0.0686052	0.612948	0.42849	0.948423	14.36	103.28	40.04	58.88	87.69	0.736	1.254	1.375	0.984	0.176	0.299	0.487	0.225	0.355	1.503	2.492	27.791	0.988	0.441
FALSE	High	Master Protein	TGGT1_239620-t26_1-p1	transcript=TGGT1_239620-t26_1 | gene=TGGT1_239620 | organism=Toxoplasma_gondii_GT1 | gene_product=5'-nucleotidase, C-terminal domain-containing protein [Source:UniProtKB/TrEMBL;Acc:S7W020] | transcript_product=5'-nucleotidase, C-terminal domain-containing protein | location=TGGT1_chrVI:797498-803758(-) | protein_length=882 | sequence_SO=chromosome | SO=protein_coding_gene | is_pseudo=false	0	14.679	8	6	9	6	882	95.5	6.47	3.44	6	1.193	0.516	0.676	2.057	0.95	0.230421	0.273334	0.818746	0.214299	0.658656	0.756101	0.774568	0.973927	0.763807	0.901508	25.18	33.13	16.1	45.11	39.89	0.98	1.193	1.396	0.664	0.295	0.516	0.759	0.454	0.676	1.431	2.057	3.135	0.95	0.749
FALSE	High	Master Protein	TGGT1_270060-t26_1-p1	transcript=TGGT1_270060-t26_1 | gene=TGGT1_270060 | organism=Toxoplasma_gondii_GT1 | gene_product=hypothetical protein | transcript_product=hypothetical protein | location=TGGT1_chrVIII:5438141-5440105(-) | protein_length=654 | sequence_SO=chromosome | SO=protein_coding_gene | is_pseudo=false	0	42.607	26	14	29	14	654	68.4	9.42	30.31	14	1.467	0.683	1.075	1.332	1.17	0.0135557	0.689085	0.480054	0.93589	0.634998	0.122074	0.931816	0.925099	0.992622	0.897666	4.22	3.99	19.86	27.32	14.78	1.509	1.13	1.467	0.665	1.535	0.683	1.075	1.666	0.931	1.332	1.086	1.606	1.053	1.88
FALSE	High	Master Protein	TGGT1_228490-t26_1-p1	transcript=TGGT1_228490-t26_1 | gene=TGGT1_228490 | organism=Toxoplasma_gondii_GT1 | gene_product=hypothetical protein | transcript_product=hypothetical protein | location=TGGT1_chrX:200935-204627(-) | protein_length=394 | sequence_SO=chromosome | SO=protein_coding_gene | is_pseudo=false	0	10.202	9	3	8	3	394	43.2	4.69	4.57	3	0.932	0.613	0.423	1.545	0.667	0.750933	0.503377	0.239419	0.633695	0.0557501	0.973495	0.909352	0.830689	0.950029	0.241021	29.71	52.94	5.24	63.31	24.86	0.932	1.166	0.605	0.953	0.363	0.613	0.909	0.423	0.409	0.885	1.545	3.172	0.667	0.571
FALSE	Medium	Master Protein	TGGT1_409330-t26_1-p1	transcript=TGGT1_409330-t26_1 | gene=TGGT1_409330 | organism=Toxoplasma_gondii_GT1 | gene_product=Carrier domain-containing protein [Source:UniProtKB/TrEMBL;Acc:S7W9Y7] | transcript_product=putative polyketide synthase | location=AAQM03000132:70-5499(-) | protein_length=1762 | sequence_SO=contig | SO=protein_coding_gene | is_pseudo=false	0.035	1.93	1	1	4	1	1762	191.3	5.94	0	1	0.83	0.24	0.117	0.984	0.236	0.303466	0.00149782	0.000158669	0.466714	1.70274e-09	0.841727	0.0142792	0.00164022	0.915333	1.39478e-08	17.79	118.42	61.52	76.09	53.7	0.098	0.943	0.83	1.194	0.081	0.24	0.117	0.076	0.199	0.31	2.021	0.984	0.371	0.163
FALSE	High	Master Protein	TGGT1_305510-t26_1-p1	transcript=TGGT1_305510-t26_1 | gene=TGGT1_305510 | organism=Toxoplasma_gondii_GT1 | gene_product=hypothetical protein | transcript_product=hypothetical protein | location=TGGT1_chrIX:5224337-5226852(+) | protein_length=417 | sequence_SO=chromosome | SO=protein_coding_gene | is_pseudo=false	0	6.588	10	2	3	2	417	45.2	7.77	2.81	2	0.877	1.622	1.423	0.395	0.962	0.490114	0.0530915	0.203128	0.00155257	0.712342	0.941301	0.313075	0.771623	0.0119477	0.92515	29.96	6.07	21.87	53.56	22.84	0.01	0.877	1.099	100	1.622	1.556	1.213	1.423	1.71	0.01	0.395	0.618	1.137	0.641
FALSE	High	Master Protein	TGGT1_256990-t26_1-p1	transcript=TGGT1_256990-t26_1 | gene=TGGT1_256990 | organism=Toxoplasma_gondii_GT1 | gene_product=AA_TRNA_LIGASE_II domain-containing protein [Source:UniProtKB/TrEMBL;Acc:S7UYX0] | transcript_product=glycyl-tRNA synthetase | location=TGGT1_chrVIIb:4226828-4230134(+) | protein_length=771 | sequence_SO=chromosome | SO=protein_coding_gene | is_pseudo=false	0	22.64	12	10	21	10	771	86.3	7.33	4.18	10	0.891	0.774	0.694	1.426	0.987	0.5529	0.758545	0.860091	0.793184	0.651078	0.946874	0.943561	0.980253	0.973268	0.898562	28.6	55.07	18.72	30.38	50.68	0.624	1.104	0.891	1.231	0.26	0.774	0.794	0.271	0.694	0.755	1.426	1.718	0.987	0.372
FALSE	High	Master Protein	TGGT1_263700-t26_1-p1	transcript=TGGT1_263700-t26_1 | gene=TGGT1_263700 | organism=Toxoplasma_gondii_GT1 | gene_product=Ribosomal protein RPS14 [Source:UniProtKB/TrEMBL;Acc:S7W6D1] | transcript_product=ribosomal protein RPS14 | location=TGGT1_chrVIIb:359504-361231(+) | protein_length=156 | sequence_SO=chromosome | SO=protein_coding_gene | is_pseudo=false	0	65.104	72	12	127	12	156	16.3	10.36	190.31	12	0.847	1.345	1.353	0.658	0.908	0.366638	0.180736	0.241634	0.0714331	0.354673	0.885121	0.649801	0.830689	0.402444	0.736	4.64	4.73	41.97	2.46	6.51	1.659	0.821	0.847	1.388	1.029	1.345	2.191	0.97	1.353	0.647	0.801	0.658	0.908	0.83
FALSE	High	Master Protein	TGGT1_226270-t26_1-p1	transcript=TGGT1_226270-t26_1 | gene=TGGT1_226270 | organism=Toxoplasma_gondii_GT1 | gene_product=hypothetical protein | transcript_product=hypothetical protein | location=TGGT1_chrX:1657298-1661542(+) | protein_length=258 | sequence_SO=chromosome | SO=protein_coding_gene | is_pseudo=false	0.01	2.65	4	1	3	1	258	27.7	9.39	2.01	1	0.539	1.056	0.391	0.618	0.653	0.000237892	0.370518	0.181311	0.0491073	0.0053397	0.00303492	0.833119	0.73068	0.291714	0.0318521	66.97	109.32	46.58	88.82	11.8	0.213	0.984	0.539	1.835	0.088	1.056	0.391	0.086	0.57	0.387	2.163	0.618	0.71	0.19
FALSE	High	Master Protein	TGGT1_259010-t26_1-p1	transcript=TGGT1_259010-t26_1 | gene=TGGT1_259010 | organism=Toxoplasma_gondii_GT1 | gene_product=Putative vacuolar ATP synthase subunit d [Source:UniProtKB/TrEMBL;Acc:S7UYG8] | transcript_product=putative vacuolar ATP synthase subunit d | location=TGGT1_chrVIIb:2988734-2994961(-) | protein_length=396 | sequence_SO=chromosome | SO=protein_coding_gene | is_pseudo=false	0.005	3.373	3	1	7	1	396	44.9	5.05	1.65	1	0.787	0.31	0.24	2.257	0.699	0.176371	0.0168164	0.0203142	0.136424	0.125466	0.66149	0.130227	0.159175	0.61009	0.405279	2.42	92.59	105.31	19.68	147.22	0.775	0.787	1.004	0.31	0.129	0.825	0.24	0.101	0.828	2.257	1.958	100	0.699	0.252
FALSE	High	Master Protein	TGGT1_297270-t26_1-p1	transcript=TGGT1_297270-t26_1 | gene=TGGT1_297270 | organism=Toxoplasma_gondii_GT1 | gene_product=hypothetical protein | transcript_product=hypothetical protein | location=TGGT1_chrII:1622746-1627852(+) | protein_length=488 | sequence_SO=chromosome | SO=protein_coding_gene | is_pseudo=false	0	9.189	8	2	2	2	488	53.1	9.52	4.67	2	100	10.776	100	1	15.78	1e-17	6.57652e-12	1e-17	0.49359	1e-17	1.73608e-16	9.72567e-11	1.34062e-16	0.915333	1.03758e-16	0	679.94	0	7412.26	458.09			100		100	1.161		100	100		0.01	100		2.49
FALSE	High	Master Protein	TGGT1_214940-t26_1-p1	transcript=TGGT1_214940-t26_1 | gene=TGGT1_214940 | organism=Toxoplasma_gondii_GT1 | gene_product=MIC2-associated protein M2AP [Source:UniProtKB/TrEMBL;Acc:A0A125YM06] | transcript_product=MIC2-associated protein M2AP | location=TGGT1_chrX:6494811-6496996(+) | protein_length=330 | sequence_SO=chromosome | SO=protein_coding_gene | is_pseudo=false	0	20.005	19	5	16	5	330	34.6	4.39	17.43	5	0.859	0.577	0.467	1.212	0.731	0.412033	0.420692	0.328653	0.864704	0.0641038	0.91043	0.868192	0.877851	0.986633	0.264448	54.35	34.87	12.82	22.24	121.57	0.628	1.374	0.859	0.577	0.314	0.755	0.467	0.43	0.656	1.031	1.212	5.312	0.731	0.389
FALSE	High	Master Protein	TGGT1_294360-t26_1-p1	transcript=TGGT1_294360-t26_1 | gene=TGGT1_294360 | organism=Toxoplasma_gondii_GT1 | gene_product=Putative ubiquitin specific protease 39 isoform 2 [Source:UniProtKB/TrEMBL;Acc:A0A125YRG4] | transcript_product=putative ubiquitin specific protease 39 isoform 2 | location=TGGT1_chrIa:826234-834253(+) | protein_length=571 | sequence_SO=chromosome | SO=protein_coding_gene | is_pseudo=false	0	92.715	57	26	112	26	571	64.1	6.23	117.38	26	0.807	0.056	0.043	18.241	0.868	0.230969	2.22045e-16	6.21358e-09	1.56519e-12	0.28596	0.756101	3.49567e-15	7.89815e-08	1.54963e-11	0.658015	2.99	54.44	59.37	33.55	8.92	0.791	0.91	0.807	0.088	0.033	0.056	0.071	0.03	0.043	9.929	18.241	22.369	0.868	0.419
FALSE	Low	Master Protein	TGGT1_205562-t26_1-p1	transcript=TGGT1_205562-t26_1 | gene=TGGT1_205562 | organism=Toxoplasma_gondii_GT1 | gene_product=hypothetical protein | transcript_product=hypothetical protein | location=TGGT1_chrVIIa:1219083-1242949(+) | protein_length=5820 | sequence_SO=chromosome | SO=protein_coding_gene | is_pseudo=false	0.073	1.588	0	1	1	1	5820	624.8	6.32	0	1	0.87	0.867	1.115	3.76	3.261	0.459483	0.765823	0.434803	0.0043506	0.000925631	0.93121	0.943561	0.906025	0.0321641	0.00609493	7.19	52.56	29.2	114.37	95.75	0.83	2.318	0.87	1.344	0.576	0.867	1.115	1.335	0.755	0.86	100	3.76	1.155	100
FALSE	Low	Master Protein	TGGT1_280700-t26_1-p1	transcript=TGGT1_280700-t26_1 | gene=TGGT1_280700 | organism=Toxoplasma_gondii_GT1 | gene_product=Arginine decarboxylase [Source:UniProtKB/TrEMBL;Acc:S7UTQ6] | transcript_product=arginine decarboxylase | location=TGGT1_chrVIIa:143677-151297(-) | protein_length=1225 | sequence_SO=chromosome | SO=protein_coding_gene | is_pseudo=false	0.062	1.678	1	1	1	1	1225	135.6	6.83	0	1	0.909	0.583	0.564	1.433	1.657	0.63561	0.400966	0.551506	0.782169	0.0551231	0.965361	0.863117	0.926406	0.971965	0.23952	8.99	73.46	68.63	21.53	8.5	0.909	0.764	0.967	1.156	0.282	0.583	1.05	0.215	0.564	1.433	1.225	3.004	1.657	0.345
FALSE	Medium	Master Protein	TGGT1_258800-t26_1-p1	transcript=TGGT1_258800-t26_1 | gene=TGGT1_258800 | organism=Toxoplasma_gondii_GT1 | gene_product=Protein kinase domain-containing protein [Source:UniProtKB/TrEMBL;Acc:S7UZ99] | transcript_product=rhoptry kinase family protein ROP31 | location=TGGT1_chrVIIb:3142724-3144319(+) | protein_length=531 | sequence_SO=chromosome | SO=protein_coding_gene | is_pseudo=false	0.034	1.982	2	1	1	1	531	59.1	9.26	0	1		100	100		100		1e-17	1e-17		1e-17		1.60374e-16	1.34062e-16		1.03758e-16		0	0		0					100			100						100
FALSE	High	Master Protein	TGGT1_227280-t26_1-p1	transcript=TGGT1_227280-t26_1 | gene=TGGT1_227280 | organism=Toxoplasma_gondii_GT1 | gene_product=Dense granule protein GRA3 [Source:UniProtKB/TrEMBL;Acc:A0A125YJQ7] | transcript_product=dense granule protein GRA3 | location=TGGT1_chrX:956231-956899(-) | protein_length=222 | sequence_SO=chromosome | SO=protein_coding_gene | is_pseudo=false	0	12.269	15	4	17	4	222	24.2	9.44	10.08	4	0.834	0.608	0.575	1.649	1.003	0.319213	0.300601	0.577315	0.515036	0.717601	0.847877	0.791152	0.928465	0.923682	0.929054	3.24	19.73	16.5	57.9	25.88	0.817	0.834	0.906	0.804	0.608	0.537	0.575	0.647	0.477	1.005	1.649	3.179	0.828	1.003
FALSE	High	Master Protein	TGGT1_254720-t26_1-p1	transcript=TGGT1_254720-t26_1 | gene=TGGT1_254720 | organism=Toxoplasma_gondii_GT1 | gene_product=Dense granule protein GRA8 [Source:UniProtKB/TrEMBL;Acc:A0A125YYI5] | transcript_product=dense granule protein GRA8 | location=TGGT1_chrIII:1884681-1885484(+) | protein_length=267 | sequence_SO=chromosome | SO=protein_coding_gene | is_pseudo=false	0	11.498	11	3	23	3	267	28.5	10.76	7.14	3	1.148	0.634	0.833	1.486	1.43	0.335404	0.536937	0.847435	0.708715	0.118023	0.868902	0.91465	0.977229	0.96852	0.387079	0.12	11.99	61.19	30.15	19.62	0.444	1.148	1.149	0.634	1.087	0.586	0.391	1.419	0.833	1.184	1.486	2.131	1.065	1.43
FALSE	High	Master Protein	TGGT1_224700-t26_1-p1	transcript=TGGT1_224700-t26_1 | gene=TGGT1_224700 | organism=Toxoplasma_gondii_GT1 | gene_product=hypothetical protein | transcript_product=hypothetical protein | location=TGGT1_chrX:2774904-2782271(-) | protein_length=1678 | sequence_SO=chromosome | SO=protein_coding_gene | is_pseudo=false	0	91.723	24	32	93	32	1678	182.5	9.57	71.81	32	0.942	1.456	1.352	0.926	1.532	0.801042	0.114671	0.242006	0.373567	0.0406611	0.985103	0.516225	0.830689	0.88952	0.191768	3.17	27.13	15.48	29.1	12.72	1.606	0.922	0.942	0.959	1.723	1.456	1.211	1.901	1.352	1.521	0.926	0.774	1.532	1.664
FALSE	High	Master Protein	TGGT1_242820-t26_1-p1	transcript=TGGT1_242820-t26_1 | gene=TGGT1_242820 | organism=Toxoplasma_gondii_GT1 | gene_product=hypothetical protein | transcript_product=hypothetical protein | location=TGGT1_chrVI:2232644-2233246(-) | protein_length=200 | sequence_SO=chromosome | SO=protein_coding_gene | is_pseudo=false	0.001	4.24	7	1	1	1	200	21.2	4.72	2.38	1	0.727	0.968	0.766	1.349	1.421	0.0660481	0.584221	0.981376	0.908416	0.508211	0.37075	0.91465	0.995031	0.987717	0.850688	57	12.04	68.76	57.64	57.49	1.476	0.727	0.525	0.968	1.053	0.519	1.429	0.766	0.273	0.825	1.349	3.802	0.798	1.421
FALSE	Medium	Master Protein	TGGT1_260580-t26_1-p1	transcript=TGGT1_260580-t26_1 | gene=TGGT1_260580 | organism=Toxoplasma_gondii_GT1 | gene_product=hypothetical protein | transcript_product=hypothetical protein | location=TGGT1_chrVIIb:2119527-2126039(+) | protein_length=1565 | sequence_SO=chromosome | SO=protein_coding_gene | is_pseudo=false	0.035	1.925	1	1	1	1	1565	166.8	8.65	0	1
FALSE	High	Master Protein	TGGT1_213040-t26_1-p1	transcript=TGGT1_213040-t26_1 | gene=TGGT1_213040 | organism=Toxoplasma_gondii_GT1 | gene_product=hypothetical protein | transcript_product=hypothetical protein | location=TGGT1_chrV:678396-686336(+) | protein_length=1824 | sequence_SO=chromosome | SO=protein_coding_gene | is_pseudo=false	0	109.637	25	34	111	34	1824	196.7	8.85	87.53	34	1.11	0.929	1.09	1.177	1.157	0.450117	0.825768	0.462431	0.802349	0.653792	0.926635	0.95266	0.913155	0.98007	0.898562	22.66	17.3	4.41	17.62	4	1.514	0.94	1.11	0.832	1.422	0.929	1.057	1.295	1.09	1.415	1.037	1.177	1.125	1.394
FALSE	Medium	Master Protein	TGGT1_244690-t26_1-p1	transcript=TGGT1_244690-t26_1 | gene=TGGT1_244690 | organism=Toxoplasma_gondii_GT1 | gene_product=hypothetical protein | transcript_product=hypothetical protein | location=TGGT1_chrVI:3366510-3368381(+) | protein_length=623 | sequence_SO=chromosome | SO=protein_coding_gene | is_pseudo=false	0.028	2.084	1	1	1	1	623	65	5.94	0	1	0.86	0.381	0.272	0.669	0.196	0.416907	0.0186251	0.0384842	0.0790161	1e-17	0.913831	0.136676	0.269547	0.42849	1.03758e-16	6.29	86.16	98.96	44.32	100.45	0.898	0.86	0.713	0.91	0.033	0.381	0.817	0.029	0.272	0.669	2.271	0.515	0.609	0.076
FALSE	High	Master Protein	TGGT1_201760-t26_1-p1	transcript=TGGT1_201760-t26_1 | gene=TGGT1_201760 | organism=Toxoplasma_gondii_GT1 | gene_product=hypothetical protein | transcript_product=hypothetical protein | location=TGGT1_chrVIIa:3716556-3719107(+) | protein_length=336 | sequence_SO=chromosome | SO=protein_coding_gene | is_pseudo=false	0	65.286	56	12	93	12	336	37.3	7.74	108.29	12	1.037	1.123	1.12	0.905	1.093	0.73667	0.427682	0.429449	0.341119	0.896946	0.973495	0.873693	0.906025	0.86944	0.9753	24.59	18.04	11.24	24.46	12.09	1.24	0.865	1.037	0.747	1.259	1.123	0.995	1.205	1.12	1.668	0.777	0.905	1.203	1.093
FALSE	High	Master Protein	TGGT1_228630-t26_1-p1	transcript=TGGT1_228630-t26_1 | gene=TGGT1_228630 | organism=Toxoplasma_gondii_GT1 | gene_product=hypothetical protein | transcript_product=hypothetical protein | location=TGGT1_chrX:179956-182506(+) | protein_length=328 | sequence_SO=chromosome | SO=protein_coding_gene | is_pseudo=false	0	6.097	6	2	3	2	328	34.7	8.24	0	2	1.327	0.409	0.246	2.001	0.587	0.0644004	0.0698833	0.0229271	0.242781	0.0455638	0.36271	0.379493	0.17722	0.802789	0.209129	7.47	75.45	19.26	41.89	93.59	0.669	1.327	1.393	0.409	0.18	0.832	0.246	0.217	1.16	1.436	2.001	5.384	0.587	0.36
FALSE	High	Master Protein	TGGT1_218600-t26_1-p1	transcript=TGGT1_218600-t26_1 | gene=TGGT1_218600 | organism=Toxoplasma_gondii_GT1 | gene_product=RRM domain-containing protein [Source:UniProtKB/TrEMBL;Acc:S7WHH5] | transcript_product=RNA recognition motif-containing protein | location=TGGT1_chrXII:1316835-1323130(+) | protein_length=752 | sequence_SO=chromosome | SO=protein_coding_gene | is_pseudo=false	0	15.841	9	6	17	6	752	84.1	10.21	9.17	6	1.002	0.707	0.762	1.225	0.847	0.898679	0.824481	0.990991	0.887301	0.245433	0.985103	0.95266	0.998067	0.986633	0.613774	9.19	13.92	18.43	20.54	14.95	1.534	0.94	1.002	0.799	0.646	0.707	1.368	0.677	0.762	0.963	1.225	1.395	0.769	0.847
FALSE	Medium	Master Protein	TGGT1_265090-t26_1-p1	transcript=TGGT1_265090-t26_1 | gene=TGGT1_265090 | organism=Toxoplasma_gondii_GT1 | gene_product=hypothetical protein | transcript_product=hypothetical protein | location=TGGT1_chrIX:1596970-1609746(-) | protein_length=2477 | sequence_SO=chromosome | SO=protein_coding_gene | is_pseudo=false	0.02	2.229	0	1	7	1	2477	267.7	7.68	1.83	1	0.722	0.487	0.351	0.791	0.293	0.0590729	0.200611	0.120625	0.189755	6.64187e-10	0.349048	0.683659	0.601724	0.715489	5.54677e-09	5.39	32.58	28.38	46.25	60.09	0.696	0.989	0.722	0.624	0.01	0.487	0.434	0.01	0.351	0.791	2.078	0.603	0.493	0.01
FALSE	High	Master Protein	TGGT1_217820-t26_1-p1	transcript=TGGT1_217820-t26_1 | gene=TGGT1_217820 | organism=Toxoplasma_gondii_GT1 | gene_product=Eukaryotic translation initiation factor 3 subunit M [Source:UniProtKB/TrEMBL;Acc:A0A125YQU9] | transcript_product=PCI domain-containing protein | location=TGGT1_chrXII:2088870-2094251(+) | protein_length=463 | sequence_SO=chromosome | SO=protein_coding_gene | is_pseudo=false	0	34.651	27	10	44	10	463	51.7	5.94	30.84	10	0.888	0.797	0.732	0.991	1.27	0.538707	0.88313	0.944227	0.478097	0.33416	0.942037	0.974587	0.993783	0.915333	0.715998	9.12	21.76	12.83	45.87	55.96	0.719	0.946	0.888	1.353	0.695	0.797	0.801	0.732	0.587	0.757	0.991	2.318	1.27	0.791
FALSE	High	Master Protein	TGGT1_311290-t26_1-p1	transcript=TGGT1_311290-t26_1 | gene=TGGT1_311290 | organism=Toxoplasma_gondii_GT1 | gene_product=Protein tyrosine phosphatase family protein, ptpla protein [Source:UniProtKB/TrEMBL;Acc:A0A125YHT1] | transcript_product=protein tyrosine phosphatase family protein, ptpla protein | location=TGGT1_chrXI:1911350-1913933(-) | protein_length=274 | sequence_SO=chromosome | SO=protein_coding_gene | is_pse…	0	11.079	8	3	5	3	274	30.5	8.85	5.95	3	1.114	0.902	1.16	1.252	1.149	0.436759	0.59364	0.389156	0.932102	0.646	0.923296	0.91465	0.898096	0.992622	0.897666	34.01	11.02	5.68	1.87	11.48	1.37	0.761	1.114	0.902	0.839	1.235	1.16	0.741	1.205	1.252	1.411	1.236	1.06	1.149
FALSE	High	Master Protein	TGGT1_293570-t26_1-p1	transcript=TGGT1_293570-t26_1 | gene=TGGT1_293570 | organism=Toxoplasma_gondii_GT1 | gene_product=Putative translocation protein sec62 [Source:UniProtKB/TrEMBL;Acc:A0A125YTM7] | transcript_product=putative translocation protein sec62 | location=TGGT1_chrIa:408074-414572(-) | protein_length=390 | sequence_SO=chromosome | SO=protein_coding_gene | is_pseudo=false	0	16.611	17	5	15	5	390	44.9	6.37	5.71	5	0.932	0.916	0.64	1.724	1.585	0.750546	0.558467	0.733968	0.441787	0.0487718	0.973495	0.91465	0.971329	0.915333	0.219242	30.9	4.18	26.28	68.5	124.22	0.528	1.177	0.932	0.489	0.916	0.942	0.256	0.778	0.64	0.927	1.724	5.673	0.257	1.585
FALSE	High	Master Protein	TGGT1_293540-t26_1-p1	transcript=TGGT1_293540-t26_1 | gene=TGGT1_293540 | organism=Toxoplasma_gondii_GT1 | gene_product=hypothetical protein | transcript_product=hypothetical protein | location=TGGT1_chrIa:376310-381238(+) | protein_length=713 | sequence_SO=chromosome | SO=protein_coding_gene | is_pseudo=false	0	36.524	27	10	25	10	713	79.2	7.68	31.87	10	1.19	1.19	1.252	0.823	1.063	0.237222	0.208411	0.310303	0.228603	0.947934	0.759781	0.693088	0.874546	0.781665	0.98955	13.09	12.41	14.7	16.75	7.14	1.19	1.038	1.295	1.19	1.29	0.939	1.128	1.408	1.252	1.157	0.74	0.823	1.114	1.063
FALSE	High	Master Protein	TGGT1_278530-t26_1-p1	transcript=TGGT1_278530-t26_1 | gene=TGGT1_278530 | organism=Toxoplasma_gondii_GT1 | gene_product=HTH cro/C1-type domain-containing protein [Source:UniProtKB/TrEMBL;Acc:A0A125YYC2] | transcript_product=putative multiprotein bridging factor type 1 family transcriptional co-activator | location=TGGT1_chrXII:5951968-5953739(+) | protein_length=144 | sequence_SO=chromosome | SO=protein_coding_gene | …	0	9.565	33	4	6	4	144	16.1	9.8	0	4	0.731	0.83	0.456	1.315	0.659	0.0700402	0.809273	0.305055	0.962796	0.00970591	0.381708	0.949222	0.873918	0.995636	0.0550216	15.11	6.14	34.25	34.45	36.51	0.731	1.16	0.663	0.83	0.232	0.866	0.456	0.255	0.593	1.315	1.621	0.769	0.874	0.351
FALSE	High	Master Protein	TGGT1_227960-t26_1-p1	transcript=TGGT1_227960-t26_1 | gene=TGGT1_227960 | organism=Toxoplasma_gondii_GT1 | gene_product=PCI domain-containing protein [Source:UniProtKB/TrEMBL;Acc:A0A125YTC9] | transcript_product=PCI domain-containing protein | location=TGGT1_chrX:612917-615688(-) | protein_length=506 | sequence_SO=chromosome | SO=protein_coding_gene | is_pseudo=false	0	14.87	10	5	11	5	506	55.6	6.38	11.79	5	0.906	0.665	0.622	1.409	1.008	0.624647	0.683304	0.691368	0.818016	0.781826	0.965361	0.931816	0.94911	0.980849	0.945292	0.68	29.95	3.6	54.3	0.67	0.902	0.906	1.077	1.106	0.665	0.553	0.9	0.622	0.607	0.893	1.409	2.88	1.003	1.008
FALSE	High	Master Protein	TGGT1_201800-t26_1-p1	transcript=TGGT1_201800-t26_1 | gene=TGGT1_201800 | organism=Toxoplasma_gondii_GT1 | gene_product=Thioredoxin domain-containing protein [Source:UniProtKB/TrEMBL;Acc:S7UVZ7] | transcript_product=hypothetical protein | location=TGGT1_chrVIIa:3679021-3681115(+) | protein_length=267 | sequence_SO=chromosome | SO=protein_coding_gene | is_pseudo=false	0.009	2.655	4	1	4	1	267	28.5	8.47	0	1	1.12	0.555	0.596	1.827	1.147	0.419017	0.367785	0.62833	0.354871	0.822072	0.913831	0.833119	0.936763	0.871983	0.958229	6.57	59.71	6	48.04	58.92	0.642	1.169	1.12	0.929	0.327	0.555	0.596	0.382	0.621	1.235	1.827	2.89	1.147	0.597
FALSE	High	Master Protein	TGGT1_224480-t26_1-p1	transcript=TGGT1_224480-t26_1 | gene=TGGT1_224480 | organism=Toxoplasma_gondii_GT1 | gene_product=Protein kinase domain-containing protein [Source:UniProtKB/TrEMBL;Acc:S7UWD5] | transcript_product=putative cell-cycle-associated protein kinase CLK | location=TGGT1_chrX:2940747-2949601(-) | protein_length=1699 | sequence_SO=chromosome | SO=protein_coding_gene | is_pseudo=false	0	15.706	4	4	5	4	1699	188.8	10.46	6.5	4	1.944	0.638	1.24	1.451	1.173	2.71786e-05	0.579752	0.319409	0.757224	0.593384	0.000387871	0.91465	0.876091	0.971965	0.884907	18.44	5.1	38.56	19.46	37.83	2.186	1.944	0.934	0.617	0.638	0.715	1.563	1.24	0.407	1.027	1.451	1.641	0.734	1.473
FALSE	High	Master Protein	TGGT1_249990-t26_1-p1	transcript=TGGT1_249990-t26_1 | gene=TGGT1_249990 | organism=Toxoplasma_gondii_GT1 | gene_product=hypothetical protein | transcript_product=hypothetical protein | location=TGGT1_chrXII:4909167-4913985(-) | protein_length=838 | sequence_SO=chromosome | SO=protein_coding_gene | is_pseudo=false	0	14.063	7	5	11	5	838	92.7	8.25	7.73	5	1.135	0.422	0.527	1.667	1.078	0.37234	0.0918977	0.464678	0.496182	0.882167	0.888131	0.451852	0.914371	0.915333	0.972975	21.82	6.1	38.52	79.79	21.61	0.713	1.302	1.135	1.266	0.405	0.422	0.8	0.527	0.419	0.77	1.667	2.796	1.235	0.675
FALSE	High	Master Protein	TGGT1_266060-t26_1-p1	transcript=TGGT1_266060-t26_1 | gene=TGGT1_266060 | organism=Toxoplasma_gondii_GT1 | gene_product=40S ribosomal protein SA [Source:UniProtKB/TrEMBL;Acc:A0A125YJG1] | transcript_product=ribosomal protein RPSA | location=TGGT1_chrIX:1148543-1150882(-) | protein_length=287 | sequence_SO=chromosome | SO=protein_coding_gene | is_pseudo=false	0	19.38	28	6	31	6	287	31.5	5.31	57.47	6	0.869	0.755	0.778	1.226	1.175	0.456664	0.687245	0.956401	0.888164	0.590042	0.93121	0.931816	0.994815	0.986633	0.883	16.59	55.09	1.48	20.35	88.1	0.654	0.979	0.869	1.202	0.509	0.755	0.786	0.534	0.778	1.058	1.226	2.585	1.175	0.477
FALSE	Medium	Master Protein	TGGT1_224130-t26_1-p1	transcript=TGGT1_224130-t26_1 | gene=TGGT1_224130 | organism=Toxoplasma_gondii_GT1 | gene_product=RRM domain-containing protein [Source:UniProtKB/TrEMBL;Acc:A0A125YI44] | transcript_product=hypothetical protein | location=TGGT1_chrX:3217756-3218599(-) | protein_length=154 | sequence_SO=chromosome | SO=protein_coding_gene | is_pseudo=false	0.035	1.928	7	1	2	1	154	16.6	5.01	0	1		100	100	0.01	1.811		1e-17	1e-17	1e-17	0.0774243		1.60374e-16	1.34062e-16	1.03865e-16	0.301937		0	0	0	47.79				100	100	100	100	100	100		0.01	0.01	100	1.227
FALSE	High	Master Protein	TGGT1_219500-t26_1-p1	transcript=TGGT1_219500-t26_1 | gene=TGGT1_219500 | organism=Toxoplasma_gondii_GT1 | gene_product=hypothetical protein | transcript_product=hypothetical protein | location=TGGT1_chrXII:839134-845961(+) | protein_length=628 | sequence_SO=chromosome | SO=protein_coding_gene | is_pseudo=false	0	40.246	29	13	33	13	628	70	6.64	24.64	13	1.2	1.511	1.414	0.856	1.205	0.216411	0.0715909	0.207471	0.271194	0.501763	0.732264	0.380758	0.779447	0.8409	0.848862	13.31	10.43	0.21	25.13	3.37	1.308	1.044	1.2	0.817	1.617	1.511	1.414	1.488	1.412	1.707	0.732	0.856	1.629	1.205
FALSE	High	Master Protein	TGGT1_313830-t26_1-p1	transcript=TGGT1_313830-t26_1 | gene=TGGT1_313830 | organism=Toxoplasma_gondii_GT1 | gene_product=Bms1-type G domain-containing protein [Source:UniProtKB/TrEMBL;Acc:S7W2H0] | transcript_product=AARP2CN (NUC121) domain-containing protein | location=TGGT1_chrXI:3674749-3684807(+) | protein_length=1273 | sequence_SO=chromosome | SO=protein_coding_gene | is_pseudo=false	0.002	3.721	2	2	2	2	1273	143.2	6.65	0	2	100	100	100	100	100	1e-17	1e-17	1e-17	1e-17	1e-17	1.73608e-16	1.60374e-16	1.34062e-16	1.03865e-16	1.03758e-16	0	0	0	0	0			100	100	100	1.41	100	100	100			100	100	100
FALSE	Medium	Master Protein	TGGT1_223930-t26_1-p1	transcript=TGGT1_223930-t26_1 | gene=TGGT1_223930 | organism=Toxoplasma_gondii_GT1 | gene_product=RNA recognition motif-containing protein [Source:UniProtKB/TrEMBL;Acc:A0A125YNA0] | transcript_product=RNA recognition motif-containing protein | location=TGGT1_chrX:3348715-3352722(-) | protein_length=382 | sequence_SO=chromosome | SO=protein_coding_gene | is_pseudo=false	0.014	2.493	3	1	1	1	382	40.6	8.84	0	1	1.491	0.01	0.01	100	100	0.0102664	1e-17	1e-17	1e-17	1e-17	0.0983814	1.60374e-16	1.34062e-16	1.03865e-16	1.03758e-16	99.59	0	0	0	0	0.489	100	1.491	0.01	0.441	0.01	0.01	100	0.01	100	100	100		100
FALSE	High	Master Protein	TGGT1_275670-t26_1-p1	transcript=TGGT1_275670-t26_1 | gene=TGGT1_275670 | organism=Toxoplasma_gondii_GT1 | gene_product=Alveolin domain containing intermediate filament IMC15 [Source:UniProtKB/TrEMBL;Acc:S7W2N2] | transcript_product=alveolin domain containing intermediate filament IMC15 | location=TGGT1_chrIII:276922-281561(-) | protein_length=692 | sequence_SO=chromosome | SO=protein_coding_gene | is_pseudo=false	0	33.845	19	11	43	11	692	77.2	8.68	53.31	11	1.082	1.412	1.327	0.862	1.186	0.548918	0.138004	0.257591	0.279278	0.553713	0.946874	0.566702	0.83465	0.844306	0.86452	16.45	23.53	2.47	16.88	4.46	1.202	0.901	1.082	0.837	1.636	1.412	1.092	1.327	1.349	1.268	0.774	0.862	1.424	1.186
FALSE	High	Master Protein	TGGT1_233460-t26_1-p1	transcript=TGGT1_233460-t26_1 | gene=TGGT1_233460 | organism=Toxoplasma_gondii_GT1 | gene_product=SAG-related sequence SRS29B [Source:UniProtKB/TrEMBL;Acc:A0A125YG48] | transcript_product=SAG-related sequence SRS29B | location=TGGT1_chrVIII:2660455-2661465(+) | protein_length=336 | sequence_SO=chromosome | SO=protein_coding_gene | is_pseudo=false	0	65.48	63	15	144	15	336	34.8	8.02	284.07	15	0.808	0.541	0.34	1.59	0.587	0.23183	0.15855	0.105924	0.579454	0.000658459	0.756417	0.616224	0.547488	0.940113	0.00440345	27.98	72.14	83.08	44.98	141.21	0.573	0.996	0.808	0.541	0.12	1.054	0.34	0.119	0.774	1.108	1.59	11.98	0.587	0.169
FALSE	Medium	Master Protein	TGGT1_252230-t26_1-p1	transcript=TGGT1_252230-t26_1 | gene=TGGT1_252230 | organism=Toxoplasma_gondii_GT1 | gene_product=hypothetical protein | transcript_product=hypothetical protein | location=TGGT1_chrIII:400465-402707(+) | protein_length=615 | sequence_SO=chromosome | SO=protein_coding_gene | is_pseudo=false	0.042	1.811	1	1	1	1	615	68.5	7.01	0	1	100	7.456	100	0.107	0.828	1e-17	1.74604e-07	1e-17	3.00773e-11	0.357787	1.73608e-16	2.23597e-06	1.34062e-16	2.90976e-10	0.73888	0	988.64	0	788.07	38.78			100		100	0.556		100	100		0.01	1.15		1.073
FALSE	High	Master Protein	TGGT1_273950-t26_1-p1	transcript=TGGT1_273950-t26_1 | gene=TGGT1_273950 | organism=Toxoplasma_gondii_GT1 | gene_product=Putative replication factor C subunit 5 [Source:UniProtKB/TrEMBL;Acc:A0A125YX47] | transcript_product=putative replication factor C subunit 5 | location=TGGT1_chrVIII:3148051-3151105(-) | protein_length=396 | sequence_SO=chromosome | SO=protein_coding_gene | is_pseudo=false	0.002	3.936	4	1	2	1	396	43.4	9.17	6.1	1	100	1	100	0.146	0.181	1e-17	0.500194	1e-17	5.67273e-09	3.4714e-09	1.73608e-16	0.909352	1.34062e-16	5.08145e-08	2.81661e-08	0	7412.26	0	1075.7	1340.11			100		100	0.01		100			0.01	2.126		3.288
FALSE	High	Master Protein	TGGT1_301440-t26_1-p1	transcript=TGGT1_301440-t26_1 | gene=TGGT1_301440 | organism=Toxoplasma_gondii_GT1 | gene_product=Calcium-dependent protein kinase CDPK1 [Source:UniProtKB/TrEMBL;Acc:S7UHK8] | transcript_product=calcium-dependent protein kinase CDPK1 | location=TGGT1_chrIV:2366836-2372193(+) | protein_length=582 | sequence_SO=chromosome | SO=protein_coding_gene | is_pseudo=false	0	66.165	39	18	87	15	582	65.4	6.44	87.52	18	0.81	0.675	0.649	1.278	0.822	0.237319	0.457311	0.755497	0.975847	0.134967	0.759781	0.8874	0.972757	0.995636	0.427103	23.84	37.16	25.54	67.46	25.27	0.697	1.07	0.81	1.106	0.54	0.675	0.787	0.649	0.554	0.696	1.278	2.66	0.822	0.702
FALSE	High	Master Protein	TGGT1_270830-t26_1-p1	transcript=TGGT1_270830-t26_1 | gene=TGGT1_270830 | organism=Toxoplasma_gondii_GT1 | gene_product=Small nuclear ribonucleoprotein Sm D2 [Source:UniProtKB/TrEMBL;Acc:S7V4D5] | transcript_product=small nuclear ribonucleoprotein | location=TGGT1_chrVIII:4965286-4968969(-) | protein_length=155 | sequence_SO=chromosome | SO=protein_coding_gene | is_pseudo=false	0.002	3.788	10	2	6	2	155	17.5	10.76	5.05	2	0.657	0.522	0.343	1.754	1.05	0.0139083	0.28691	0.109725	0.414438	0.980056	0.124583	0.779484	0.562053	0.905347	0.997174	28.05	53.21	12.44	39.2	87.93	0.553	1.299	0.657	0.814	0.244	0.522	0.45	0.316	0.343	1.29	1.754	100	1.05	0.427
FALSE	High	Master Protein	TGGT1_221670-t26_1-p1	transcript=TGGT1_221670-t26_1 | gene=TGGT1_221670 | organism=Toxoplasma_gondii_GT1 | gene_product=Transcriptional elongation factor FACT140 [Source:UniProtKB/TrEMBL;Acc:S7ULL0] | transcript_product=transcriptional elongation factor FACT140 | location=TGGT1_chrII:521099-534404(-) | protein_length=1198 | sequence_SO=chromosome | SO=protein_coding_gene | is_pseudo=false	0.001	4.298	2	2	3	2	1198	134.5	5.21	1.8	2	0.852	0.624	0.539	1.322	2.019	0.384686	0.589092	0.491392	0.952199	0.0252181	0.900979	0.91465	0.926268	0.995636	0.128492	8.49	28.14	1.88	24.62	1.56	0.806	0.852	1.336	1.092	0.624	0.525	0.88	0.532	0.539	1.102	1.322	3.887	2.019	0.825
FALSE	High	Master Protein	TGGT1_266640-t26_1-p1	transcript=TGGT1_266640-t26_1 | gene=TGGT1_266640 | organism=Toxoplasma_gondii_GT1 | gene_product=Acetyl-coenzyme A synthetase [Source:UniProtKB/TrEMBL;Acc:S7UHB7] | transcript_product=putative Acetyl-coenzyme A synthetase 2 | location=TGGT1_chrIX:887254-895827(+) | protein_length=714 | sequence_SO=chromosome | SO=protein_coding_gene | is_pseudo=false	0	53.18	28	17	86	17	714	79.9	6.89	49.58	17	1.059	0.453	0.386	3.336	1.392	0.640341	0.0515095	0.174045	0.0113333	0.13312	0.965361	0.304794	0.723314	0.0789601	0.422822	21.79	16.97	25.28	11.68	77.61	0.793	1.215	1.059	0.511	0.243	0.453	0.386	0.307	0.466	3.336	3.073	6.119	1.392	0.663
FALSE	High	Master Protein	TGGT1_279420-t26_1-p1	transcript=TGGT1_279420-t26_1 | gene=TGGT1_279420 | organism=Toxoplasma_gondii_GT1 | gene_product=hypothetical protein | transcript_product=hypothetical protein | location=TGGT1_chrIX:26421-30410(+) | protein_length=1329 | sequence_SO=chromosome | SO=protein_coding_gene | is_pseudo=false	0	47.961	18	16	35	16	1329	144.9	5.2	22.45	16	1.003	0.611	0.717	1.318	1.012	0.893682	0.344124	0.911957	0.957817	0.76028	0.985103	0.82651	0.985261	0.995636	0.940377	25.49	0.92	16.61	2.49	5.39	0.814	1.003	1.175	0.611	0.968	0.608	0.645	1.045	0.717	1.318	1.296	1.734	0.975	1.24
FALSE	High	Master Protein	TGGT1_290700-t26_1-p1	transcript=TGGT1_290700-t26_1 | gene=TGGT1_290700 | organism=Toxoplasma_gondii_GT1 | gene_product=hypothetical protein | transcript_product=hypothetical protein | location=TGGT1_chrIX:3657972-3658910(+) | protein_length=312 | sequence_SO=chromosome | SO=protein_coding_gene | is_pseudo=false	0	22.623	26	6	10	6	312	34.5	9.67	14.6	6	1.258	0.831	1.039	1.996	1.969	0.127531	0.772803	0.523206	0.245837	0.0060605	0.576105	0.943561	0.926406	0.803658	0.0354115	65.11	5.64	66.31	12.46	8.99	1.811	1.258	0.484	0.831	0.863	0.636	1.504	1.039	0.308	1.828	1.996	2.332	1.38	1.969
FALSE	High	Master Protein	TGGT1_222220-t26_1-p1	transcript=TGGT1_222220-t26_1 | gene=TGGT1_222220 | organism=Toxoplasma_gondii_GT1 | gene_product=Alveolin domain containing intermediate filament IMC7 [Source:UniProtKB/TrEMBL;Acc:A0A125YVP0] | transcript_product=alveolin domain containing intermediate filament IMC7 | location=TGGT1_chrII:949239-952716(+) | protein_length=429 | sequence_SO=chromosome | SO=protein_coding_gene | is_pseudo=false	0	159.677	72	25	292	25	429	46.8	5.1	423.38	25	1.184	1.186	0.986	0.974	1.211	0.249366	0.338289	0.593935	0.450923	0.478157	0.774782	0.823825	0.93387	0.915333	0.838288	15.86	35.82	0.89	3.86	2.07	1.375	1.057	1.184	0.63	1.186	1.472	0.98	0.986	1.73	1.712	0.974	0.95	1.211	1.063
FALSE	High	Master Protein	TGGT1_235380-t26_1-p1	transcript=TGGT1_235380-t26_1 | gene=TGGT1_235380 | organism=Toxoplasma_gondii_GT1 | gene_product=hypothetical protein | transcript_product=hypothetical protein | location=TGGT1_chrX:4705213-4712437(-) | protein_length=583 | sequence_SO=chromosome | SO=protein_coding_gene | is_pseudo=false	0	160.183	64	29	247	29	583	65.2	9.26	380.9	29	1.019	0.989	1.148	1.104	1.122	0.816615	0.682762	0.400789	0.67344	0.783024	0.985103	0.931816	0.901174	0.964904	0.945372	7.9	44.34	9.18	33.2	8.06	1.39	0.965	1.019	0.706	1.41	0.989	1.148	1.219	0.975	1.464	0.856	1.104	1.041	1.183
FALSE	High	Master Protein	TGGT1_267370-t26_1-p1	transcript=TGGT1_267370-t26_1 | gene=TGGT1_267370 | organism=Toxoplasma_gondii_GT1 | gene_product=Kinesin motor domain-containing protein [Source:UniProtKB/TrEMBL;Acc:S7VW10] | transcript_product=kinesin motor domain-containing protein | location=TGGT1_chrIX:516427-528271(+) | protein_length=2395 | sequence_SO=chromosome | SO=protein_coding_gene | is_pseudo=false	0	156.894	28	46	132	46	2395	256.6	8.54	106.95	46	1.055	1.065	1.281	0.959	1.201	0.656181	0.526614	0.288454	0.425386	0.508849	0.967609	0.91465	0.852635	0.914823	0.850688	6.91	26.74	21.17	19.59	27.67	1.389	1.055	1.006	0.873	1.644	1.065	1.281	1.699	1.098	1.268	0.847	0.959	1.201	1.425
FALSE	High	Master Protein	TGGT1_295850-t26_1-p1	transcript=TGGT1_295850-t26_1 | gene=TGGT1_295850 | organism=Toxoplasma_gondii_GT1 | gene_product=Cyclic nucleotide-binding domain-containing protein [Source:UniProtKB/TrEMBL;Acc:S7VRS7] | transcript_product=cyclic nucleotide-binding domain-containing protein | location=TGGT1_chrIa:1477996-1491633(-) | protein_length=3062 | sequence_SO=chromosome | SO=protein_coding_gene | is_pseudo=false	0	51.468	8	19	24	19	3062	331.3	6.48	14.91	19	1.244	0.986	1.195	1.31	1.035	0.145411	0.540108	0.356976	0.970247	0.869971	0.601652	0.91465	0.89526	0.995636	0.969655	13.38	7.62	9.86	7.69	5.52	1.364	1.244	1.132	0.986	1.039	0.821	1.275	1.195	0.827	1.242	1.31	1.69	0.996	1.443
FALSE	High	Master Protein	TGGT1_232560-t26_1-p1	transcript=TGGT1_232560-t26_1 | gene=TGGT1_232560 | organism=Toxoplasma_gondii_GT1 | gene_product=hypothetical protein | transcript_product=hypothetical protein | location=TGGT1_chrVIII:2156765-2165546(+) | protein_length=1822 | sequence_SO=chromosome | SO=protein_coding_gene | is_pseudo=false	0.008	2.812	1	1	1	1	1822	200.1	8.02	0	1		100	100		100		1e-17	1e-17		1e-17		1.60374e-16	1.34062e-16		1.03758e-16		0	0		0					100			100						100
FALSE	Medium	Master Protein	TGGT1_216620-t26_1-p1	transcript=TGGT1_216620-t26_1 | gene=TGGT1_216620 | organism=Toxoplasma_gondii_GT1 | gene_product=EF hand domain-containing protein [Source:UniProtKB/TrEMBL;Acc:S7VUJ8] | transcript_product=EF hand domain-containing protein | location=TGGT1_chrXI:5927325-5957645(+) | protein_length=3700 | sequence_SO=chromosome | SO=protein_coding_gene | is_pseudo=false	0.014	2.5	0	1	1	1	3700	411.7	6.32	0	1	1.192	0.692	0.825	1.322	3.173	0.232502	0.786224	0.863945	0.952077	0.00246179	0.756417	0.943561	0.981008	0.995636	0.0154948	8.22	105.55	51.03	39.23	116.85	1.192	1.126	1.662	0.692	2.401	0.369	0.825	2.704	0.613	0.972	1.322	100	0.672	3.173
FALSE	Medium	Master Protein	TGGT1_311360-t26_1-p1	transcript=TGGT1_311360-t26_1 | gene=TGGT1_311360 | organism=Toxoplasma_gondii_GT1 | gene_product=Protein kinase G AGC kinase family member PKG [Source:UniProtKB/TrEMBL;Acc:S7UT18] | transcript_product=protein kinase G AGC kinase family member PKG | location=TGGT1_chrXI:1956120-1971174(-) | protein_length=994 | sequence_SO=chromosome | SO=protein_coding_gene | is_pseudo=false	0.03	2.064	1	1	1	1	994	111.2	6.16	0	1	1.052	0.557	0.879	1.095	0.61	0.67174	0.393317	0.763558	0.658994	0.0372586	0.969375	0.853424	0.972757	0.960962	0.177679	43.53	98.13	41.74	68.44	6.76	0.743	1.052	1.578	1.647	0.332	0.557	1.224	0.349	0.879	0.59	1.758	1.095	0.971	0.583
FALSE	High	Master Protein	TGGT1_309265-t26_1-p1	transcript=TGGT1_309265-t26_1 | gene=TGGT1_309265 | organism=Toxoplasma_gondii_GT1 | gene_product=Oxidoreductase, short chain dehydrogenase/reductase family protein [Source:UniProtKB/TrEMBL;Acc:S7USU2] | transcript_product=oxidoreductase, short chain dehydrogenase/reductase family protein | location=TGGT1_chrXI:562095-565518(+) | protein_length=928 | sequence_SO=chromosome | SO=protein_coding_gen…	0	8.792	4	3	3	3	928	99.2	9.36	2.01	3	0.99	1.179	0.927	1.93	1.895	0.955419	0.227095	0.683196	0.284353	0.0222135	0.989188	0.718995	0.945617	0.844579	0.114547	4.83	50.71	27.47	3.28	31.18	0.99	1.247	0.959	0.775	1.612	1.179	0.768	0.927	1.138	1.93	0.98	1.972	1.496	1.895
FALSE	High	Master Protein	TGGT1_220240-t26_1-p1	transcript=TGGT1_220240-t26_1 | gene=TGGT1_220240 | organism=Toxoplasma_gondii_GT1 | gene_product=hypothetical protein | transcript_product=hypothetical protein | location=TGGT1_chrV:140178-141758(-) | protein_length=526 | sequence_SO=chromosome | SO=protein_coding_gene | is_pseudo=false	0	6.061	4	2	6	2	526	54.1	9.86	3.28	2	1.03	0.565	0.51	1.535	0.679	0.767188	0.348186	0.424304	0.64585	0.0618562	0.979488	0.830997	0.904295	0.954956	0.258919	21.43	42.38	18.24	32.15	3.28	1.03	1.179	0.568	0.565	0.433	0.79	0.581	0.51	0.449	1.202	1.535	2.47	0.679	0.664
FALSE	High	Master Protein	TGGT1_263870-t26_1-p1	transcript=TGGT1_263870-t26_1 | gene=TGGT1_263870 | organism=Toxoplasma_gondii_GT1 | gene_product=GST C-terminal domain-containing protein [Source:UniProtKB/TrEMBL;Acc:S7WDQ1] | transcript_product=glutamate-tRNA ligase | location=TGGT1_chrVIIb:247108-256643(-) | protein_length=828 | sequence_SO=chromosome | SO=protein_coding_gene | is_pseudo=false	0	41.59	22	14	29	14	828	92.5	8.85	27.86	14	0.985	0.754	0.841	1.127	0.84	0.982669	0.788212	0.832818	0.714723	0.188625	0.995677	0.944856	0.974841	0.96852	0.528679	16.58	15.49	12.2	25.34	18.74	0.886	1.152	0.985	0.842	0.635	0.754	0.916	0.757	0.841	0.934	1.127	2.283	0.84	0.746
FALSE	High	Master Protein	TGGT1_236580-t26_1-p1	transcript=TGGT1_236580-t26_1 | gene=TGGT1_236580 | organism=Toxoplasma_gondii_GT1 | gene_product=Ribonucloprotein [Source:UniProtKB/TrEMBL;Acc:S7VZI5] | transcript_product=Prp31-15.5k-U4 Snrna Complex family protein | location=TGGT1_chrX:5326799-5328659(-) | protein_length=182 | sequence_SO=chromosome | SO=protein_coding_gene | is_pseudo=false	0.008	2.952	7	1	2	1	182	19.9	8.1	3.83	1	1.17	0.663	0.573	1.907	0.894	0.280964	0.670984	0.573114	0.29855	0.505228	0.809999	0.931816	0.926406	0.850784	0.850688	79.06	21.43	45.6	58.62	146.93	0.546	100	1.17	0.775	0.01	0.663	0.423		0.776	1.153	1.907	100	0.894	0.01
FALSE	High	Master Protein	TGGT1_305980-t26_1-p1	transcript=TGGT1_305980-t26_1 | gene=TGGT1_305980 | organism=Toxoplasma_gondii_GT1 | gene_product=Pyruvate dehydrogenase complex subunit PDH-E3I [Source:UniProtKB/TrEMBL;Acc:S7UIE0] | transcript_product=pyruvate dehydrogenase complex subunit PDH-E3I | location=TGGT1_chrIX:5486775-5490424(+) | protein_length=638 | sequence_SO=chromosome | SO=protein_coding_gene | is_pseudo=false	0	50.993	34	14	62	14	638	66.7	7.52	65.41	14	1.113	1.114	1.223	1.051	1.15	0.439732	0.44238	0.333584	0.580374	0.676708	0.923296	0.88144	0.877851	0.940113	0.909722	0.26	32.72	53.08	11.39	15.61	1.113	1.115	0.999	0.804	1.359	1.114	0.744	1.661	1.223	1.235	0.97	1.051	1.029	1.15
FALSE	High	Master Protein	TGGT1_272660-t26_1-p1	transcript=TGGT1_272660-t26_1 | gene=TGGT1_272660 | organism=Toxoplasma_gondii_GT1 | gene_product=hypothetical protein | transcript_product=hypothetical protein | location=TGGT1_chrVIII:3808733-3810272(+) | protein_length=258 | sequence_SO=chromosome | SO=protein_coding_gene | is_pseudo=false	0	8.188	16	3	9	3	258	28	6.43	9.93	3	0.958	0.474	0.53	1.45	1.449	0.883536	0.167474	0.470873	0.758491	0.197299	0.985103	0.62885	0.916119	0.971965	0.543924	8.34	25.91	22.73	28.37	88.35	0.721	1.015	0.958	0.964	0.404	0.474	0.626	0.308	0.53	1.173	1.45	7.866	1.449	0.585
FALSE	High	Master Protein	TGGT1_226220-t26_1-p1	transcript=TGGT1_226220-t26_1 | gene=TGGT1_226220 | organism=Toxoplasma_gondii_GT1 | gene_product=Alveolin domain containing intermediate filament IMC9 [Source:UniProtKB/TrEMBL;Acc:S7UX40] | transcript_product=alveolin domain containing intermediate filament IMC9 | location=TGGT1_chrX:1688557-1695197(+) | protein_length=756 | sequence_SO=chromosome | SO=protein_coding_gene | is_pseudo=false	0	52.376	34	17	80	17	756	83.2	7.5	75.99	17	1.06	0.847	1.118	1.126	1.14	0.634972	0.952935	0.432013	0.713459	0.712776	0.965361	0.987758	0.906025	0.96852	0.92515	1.96	13.4	19.58	31.28	7.17	1.06	1.046	1.454	0.847	1.397	0.776	0.97	1.657	1.118	1.512	0.889	1.126	1.301	1.14
FALSE	High	Master Protein	TGGT1_295420-t26_1-p1	transcript=TGGT1_295420-t26_1 | gene=TGGT1_295420 | organism=Toxoplasma_gondii_GT1 | gene_product=hypothetical protein | transcript_product=hypothetical protein | location=TGGT1_chrIa:1740779-1746947(-) | protein_length=735 | sequence_SO=chromosome | SO=protein_coding_gene | is_pseudo=false	0	69.889	39	23	60	23	735	80.6	5.33	37.42	23	1.157	1.133	1.395	0.943	1.453	0.313157	0.411667	0.217419	0.400635	0.0809008	0.8432	0.865097	0.796206	0.902143	0.309848	2.81	43.42	14.91	10.5	6.54	1.234	1.135	1.157	0.8	1.465	1.133	1.116	1.536	1.395	1.879	0.881	0.943	1.453	1.517
FALSE	High	Master Protein	TGGT1_262050-t26_1-p1	transcript=TGGT1_262050-t26_1 | gene=TGGT1_262050 | organism=Toxoplasma_gondii_GT1 | gene_product=Protein kinase domain-containing protein [Source:UniProtKB/TrEMBL;Acc:S7UY96] | transcript_product=rhoptry kinase family protein ROP39 | location=TGGT1_chrVIIb:1382528-1384294(+) | protein_length=588 | sequence_SO=chromosome | SO=protein_coding_gene | is_pseudo=false	0	112.147	41	25	224	25	588	65.1	8.76	376.34	25	1.034	0.763	0.757	1.496	1.116	0.747013	0.709256	0.999983	0.696344	0.807103	0.973495	0.933509	0.999983	0.9684	0.956898	9.7	38.32	0.69	14.37	9.07	1.331	0.967	1.034	0.594	1.029	0.763	0.757	0.823	0.754	1.711	1.351	1.496	1.047	1.555
FALSE	Medium	Master Protein	TGGT1_263510-t26_1-p1	transcript=TGGT1_263510-t26_1 | gene=TGGT1_263510 | organism=Toxoplasma_gondii_GT1 | gene_product=Spc97 / Spc98 family protein [Source:UniProtKB/TrEMBL;Acc:S7W6A3] | transcript_product=Spc97 / Spc98 family protein | location=TGGT1_chrVIIb:476801-486829(-) | protein_length=1877 | sequence_SO=chromosome | SO=protein_coding_gene | is_pseudo=false	0.028	2.094	1	1	1	1	1877	202.1	6.64	0	1		100	100		100		1e-17	1e-17		1e-17		1.60374e-16	1.34062e-16		1.03758e-16		0	0		0					100			100						100
FALSE	High	Master Protein	TGGT1_252630-t26_1-p1	transcript=TGGT1_252630-t26_1 | gene=TGGT1_252630 | organism=Toxoplasma_gondii_GT1 | gene_product=hypothetical protein | transcript_product=hypothetical protein | location=TGGT1_chrIII:604444-605972(-) | protein_length=136 | sequence_SO=chromosome | SO=protein_coding_gene | is_pseudo=false	0	7.308	33	3	9	3	136	15.1	9.25	0	3	1.098	0.507	0.56	1.65	1.245	0.489259	0.254678	0.542209	0.51392	0.407459	0.941301	0.750905	0.926406	0.923638	0.785551	5.62	4.85	0.74	23.93	51.7	0.715	1.14	1.098	0.899	0.491	0.507	0.633	0.56	0.557	1.384	1.65	100	1.245	0.811
FALSE	High	Master Protein	TGGT1_214260-t26_1-p1	transcript=TGGT1_214260-t26_1 | gene=TGGT1_214260 | organism=Toxoplasma_gondii_GT1 | gene_product=PPDK_N domain-containing protein [Source:UniProtKB/TrEMBL;Acc:S7UQ91] | transcript_product=putative alpha-glucan water dikinase 1 | location=TGGT1_chrX:6069350-6083963(+) | protein_length=1715 | sequence_SO=chromosome | SO=protein_coding_gene | is_pseudo=false	0	7.328	2	3	4	3	1715	191.4	6.13	2.16	3	1.136	0.508	0.502	4.368	2.508	0.368823	0.247429	0.407255	0.00114705	0.00410261	0.886361	0.738772	0.901174	0.00890807	0.025265	21.9	13.15	3.09	88.75	102.43	0.922	1.136	1.304	0.557	0.442	0.508	0.514	0.502	0.492	100	1.753	4.368	100	0.775
FALSE	High	Master Protein	TGGT1_252210-t26_1-p1	transcript=TGGT1_252210-t26_1 | gene=TGGT1_252210 | organism=Toxoplasma_gondii_GT1 | gene_product=PPR_long domain-containing protein [Source:UniProtKB/TrEMBL;Acc:S7W2F8] | transcript_product=pentatricopeptide repeat domain-containing protein | location=TGGT1_chrIII:378447-385902(-) | protein_length=1904 | sequence_SO=chromosome | SO=protein_coding_gene | is_pseudo=false	0.004	3.505	1	1	1	1	1904	201.2	6.87	0	1
FALSE	High	Master Protein	TGGT1_237010-t26_1-p1	transcript=TGGT1_237010-t26_1 | gene=TGGT1_237010 | organism=Toxoplasma_gondii_GT1 | gene_product=RAP domain-containing protein [Source:UniProtKB/TrEMBL;Acc:S7UQL1] | transcript_product=hypothetical protein | location=TGGT1_chrX:5557116-5563014(-) | protein_length=645 | sequence_SO=chromosome | SO=protein_coding_gene | is_pseudo=false	0	23.57	16	8	15	8	645	71.9	8.18	19.57	8	1.086	0.903	0.938	0.987	1.098	0.535865	0.679541	0.666718	0.47194	0.893747	0.942037	0.931816	0.943071	0.915333	0.9753	5.91	43.03	20.98	41.81	17.41	0.972	1.129	1.086	1.273	0.903	0.684	1.092	0.938	0.665	0.716	0.987	1.375	1.282	0.969
FALSE	Low	Master Protein	TGGT1_306210-t26_1-p1	transcript=TGGT1_306210-t26_1 | gene=TGGT1_306210 | organism=Toxoplasma_gondii_GT1 | gene_product=CDC73_C domain-containing protein [Source:UniProtKB/TrEMBL;Acc:S7UH85] | transcript_product=RNA polymerase II accessory factor CDC73 | location=TGGT1_chrIX:5609297-5613642(+) | protein_length=720 | sequence_SO=chromosome | SO=protein_coding_gene | is_pseudo=false	0.073	1.592	3	1	3	1	720	77.6	8	0	1
FALSE	High	Master Protein	TGGT1_219270-t26_1-p1	transcript=TGGT1_219270-t26_1 | gene=TGGT1_219270 | organism=Toxoplasma_gondii_GT1 | gene_product=Multi-pass transmembrane protein [Source:UniProtKB/TrEMBL;Acc:A0A125YRY2] | transcript_product=multi-pass transmembrane protein | location=TGGT1_chrXII:948336-949904(+) | protein_length=389 | sequence_SO=chromosome | SO=protein_coding_gene | is_pseudo=false	0	94.168	36	7	179	7	389	43	4.94	318.34	7	1.33	0.848	1.052	1.063	1.093	0.0624067	0.957599	0.507391	0.601809	0.898496	0.357459	0.988171	0.926268	0.942063	0.9753	2.95	26.22	6.71	11.3	1.75	1.33	0.952	1.356	0.848	1.054	0.721	1.554	1.004	1.052	1.063	0.982	1.299	1.106	1.08
FALSE	High	Master Protein	TGGT1_319850-t26_1-p1	transcript=TGGT1_319850-t26_1 | gene=TGGT1_319850 | organism=Toxoplasma_gondii_GT1 | gene_product=RRM domain-containing protein [Source:UniProtKB/TrEMBL;Acc:S7UK80] | transcript_product=splicing factor U2AF family SnRNP auxilary factor large subunit, RRM domain-containing protein | location=TGGT1_chrIV:689661-691811(+) | protein_length=495 | sequence_SO=chromosome | SO=protein_coding_gene | is_ps…	0	5.741	6	2	7	2	495	51.6	9.06	3.84	2	0.893	0.251	0.249	3.358	0.835	0.5641	0.000596865	0.0247754	0.0107754	0.346733	0.956627	0.00592035	0.189797	0.0753833	0.730143	14.96	1.24	18.02	27.77	32.66	0.893	0.994	0.678	0.249	0.251	0.4	0.222	0.249	0.401	3.358	2.729	100	0.835	0.684
FALSE	High	Master Protein	TGGT1_247510-t26_1-p1	transcript=TGGT1_247510-t26_1 | gene=TGGT1_247510 | organism=Toxoplasma_gondii_GT1 | gene_product=FBPase domain-containing protein [Source:UniProtKB/TrEMBL;Acc:A0A125YGG2] | transcript_product=fructose-bisphospatase II | location=TGGT1_chrXII:3317257-3321142(+) | protein_length=381 | sequence_SO=chromosome | SO=protein_coding_gene | is_pseudo=false	0	66.541	42	16	144	16	381	42.4	6.61	159.98	16	0.961	0.739	0.88	1.186	1.001	0.898362	0.637902	0.761801	0.819408	0.709117	0.985103	0.922967	0.972757	0.980849	0.92515	21.34	29.05	19.74	38.07	18.02	0.84	0.961	1.227	0.919	0.587	0.739	1.015	0.575	0.88	0.882	1.186	1.561	1.001	0.779
FALSE	High	Master Protein	TGGT1_231920-t26_1-p1	transcript=TGGT1_231920-t26_1 | gene=TGGT1_231920 | organism=Toxoplasma_gondii_GT1 | gene_product=Oxidoreductase, short chain dehydrogenase/reductase family protein [Source:UniProtKB/TrEMBL;Acc:S7WJ25] | transcript_product=oxidoreductase, short chain dehydrogenase/reductase family protein | location=TGGT1_chrVIII:1641278-1644681(-) | protein_length=303 | sequence_SO=chromosome | SO=protein_coding…	0.001	4.127	8	1	2	1	303	33.7	6.8	2.5	1
FALSE	Medium	Master Protein	TGGT1_211240-t26_1-p1	transcript=TGGT1_211240-t26_1 | gene=TGGT1_211240 | organism=Toxoplasma_gondii_GT1 | gene_product=Putative peptidyl-tRNA hydrolase [Source:UniProtKB/TrEMBL;Acc:S7UKJ2] | transcript_product=putative peptidyl-tRNA hydrolase | location=TGGT1_chrIV:1827895-1830938(+) | protein_length=195 | sequence_SO=chromosome | SO=protein_coding_gene | is_pseudo=false	0.015	2.427	7	1	1	1	195	21.1	8.7	0	1		100	100		100		1e-17	1e-17		1e-17		1.60374e-16	1.34062e-16		1.03758e-16		0	0		0					100			100						100
FALSE	High	Master Protein	TGGT1_280770-t26_1-p1	transcript=TGGT1_280770-t26_1 | gene=TGGT1_280770 | organism=Toxoplasma_gondii_GT1 | gene_product=Regulator of chromosome condensation (RCC1) repeat-containing protein [Source:UniProtKB/TrEMBL;Acc:S7UU92] | transcript_product=regulator of chromosome condensation (RCC1) repeat-containing protein | location=TGGT1_chrVIIa:80104-94780(+) | protein_length=1933 | sequence_SO=chromosome | SO=protein_cod…	0	45.771	11	16	17	16	1933	209.1	5.43	17.14	16	1.188	2.343	1.826	0.522	1.045	0.241602	0.00084157	0.0755651	0.0155195	0.925817	0.767656	0.0082522	0.444075	0.104264	0.980816	37.25	71.21	55.3	39.42	25.4	0.699	1.486	1.188	1.218	5.367	2.343	0.852	2.508	1.826	0.711	0.522	0.359	0.866	1.894
FALSE	High	Master Protein	TGGT1_297110-t26_1-p1	transcript=TGGT1_297110-t26_1 | gene=TGGT1_297110 | organism=Toxoplasma_gondii_GT1 | gene_product=Kinesin motor domain-containing protein [Source:UniProtKB/TrEMBL;Acc:S7VZM9] | transcript_product=kinesin motor domain-containing protein | location=TGGT1_chrII:1510242-1522387(-) | protein_length=1687 | sequence_SO=chromosome | SO=protein_coding_gene | is_pseudo=false	0.002	4.043	1	1	1	1	1687	180	6.9	2.46	1	0.766	1.679	0.677	100	100	0.127618	0.0290235	0.820726	1e-17	1e-17	0.576105	0.199217	0.973927	1.03865e-16	1.03758e-16	81.54	147.38	70.17	0	0	0.01	0.766	1.702	100	1.679	0.01	0.677	1.285	0.01		100	100	100	100
FALSE	High	Master Protein	TGGT1_209210-t26_1-p1	transcript=TGGT1_209210-t26_1 | gene=TGGT1_209210 | organism=Toxoplasma_gondii_GT1 | gene_product=hypothetical protein | transcript_product=hypothetical protein | location=TGGT1_chrIb:1139917-1148599(+) | protein_length=1492 | sequence_SO=chromosome | SO=protein_coding_gene | is_pseudo=false	0	22.848	7	9	14	9	1492	166.8	5.54	1.8	9	0.906	0.853	0.804	1.435	1.267	0.623019	0.750199	0.904576	0.779628	0.360962	0.965361	0.943561	0.985048	0.971965	0.742748	0.48	6.04	29.27	26.33	0.63	1.183	0.906	0.903	0.889	0.853	0.596	1.001	0.804	0.592	1.18	1.435	1.84	0.955	1.272
FALSE	Low	Master Protein	TGGT1_270865-t26_1-p1	transcript=TGGT1_270865-t26_1 | gene=TGGT1_270865 | organism=Toxoplasma_gondii_GT1 | gene_product=Putative adenylate cyclase [Source:UniProtKB/TrEMBL;Acc:S7WDA0] | transcript_product=putative adenylate cyclase | location=TGGT1_chrVIII:4921378-4938757(-) | protein_length=2040 | sequence_SO=chromosome | SO=protein_coding_gene | is_pseudo=false	0.058	1.7	1	1	2	1	2040	222.6	6.34	0	1	1.253	0.603	0.575	100	10.478	0.134238	0.519266	0.578168	1e-17	1.61138e-12	0.585639	0.91465	0.928966	1.03865e-16	1.42937e-11	35.38	28.51	57.09	0	699.71	1.253	1.624	0.954	0.747	0.01	0.603	0.935	0.01	0.575	1.471	100	100	1.098
FALSE	High	Master Protein	TGGT1_239740-t26_1-p1	transcript=TGGT1_239740-t26_1 | gene=TGGT1_239740 | organism=Toxoplasma_gondii_GT1 | gene_product=Dense granule protein GRA14 [Source:UniProtKB/TrEMBL;Acc:A0A125YJW1] | transcript_product=dense granule protein GRA14 | location=TGGT1_chrVI:875718-876944(-) | protein_length=408 | sequence_SO=chromosome | SO=protein_coding_gene | is_pseudo=false	0.008	2.911	3	1	2	1	408	44.7	8.5	0	1	0.861	0.443	0.364	100	100	0.421014	0.161755	0.138794	1e-17	1e-17	0.913831	0.619635	0.638527	1.03865e-16	1.03758e-16	29.88	18.98	40.58	0	0	0.716	0.861	1.131	0.508	0.01	0.443	0.364	0.01	0.501	100	1.851	100	100	0.01
FALSE	High	Master Protein	TGGT1_214820-t26_1-p1	transcript=TGGT1_214820-t26_1 | gene=TGGT1_214820 | organism=Toxoplasma_gondii_GT1 | gene_product=G-patch domain-containing protein [Source:UniProtKB/TrEMBL;Acc:S7W5T1] | transcript_product=G-patch domain-containing protein | location=TGGT1_chrX:6402048-6404851(+) | protein_length=466 | sequence_SO=chromosome | SO=protein_coding_gene | is_pseudo=false	0	5.575	5	2	5	2	466	49.6	5.29	0	2	1.249	0.29	0.289	4.484	0.934	0.139324	0.00947498	0.0513641	0.000893191	0.578388	0.590421	0.0797013	0.335136	0.0070008	0.873963	16.28	16.81	19.93	54.48	0.94	0.877	1.249	1.386	0.29	0.327	0.208	0.254	0.408	0.289	100	2.837	4.484	100	0.928
FALSE	Medium	Master Protein	TGGT1_249730-t26_1-p1	transcript=TGGT1_249730-t26_1 | gene=TGGT1_249730 | organism=Toxoplasma_gondii_GT1 | gene_product=hypothetical protein | transcript_product=hypothetical protein | location=TGGT1_chrXII:4698516-4710431(-) | protein_length=891 | sequence_SO=chromosome | SO=protein_coding_gene | is_pseudo=false	0.029	2.078	1	1	1	1	891	100.8	6.02	0	1	1.087	0.94	1.285	1.58	1.152	0.531289	0.647057	0.285795	0.591628	0.951645	0.942037	0.927717	0.852635	0.942063	0.990916	15.77	42.89	13.76	25.17	17.7	0.971	1.087	1.926	1.323	0.94	0.729	1.285	1.022	1.404	0.767	1.848	1.58	1.015	1.738
FALSE	High	Master Protein	TGGT1_243800-t26_1-p1	transcript=TGGT1_243800-t26_1 | gene=TGGT1_243800 | organism=Toxoplasma_gondii_GT1 | gene_product=AMP-binding domain-containing protein [Source:UniProtKB/TrEMBL;Acc:S7VU20] | transcript_product=putative long-chain fatty acid CoA ligase | location=TGGT1_chrVI:2778396-2788707(-) | protein_length=758 | sequence_SO=chromosome | SO=protein_coding_gene | is_pseudo=false	0	29.084	18	10	44	10	758	83.5	5.52	19.85	10	0.98	0.811	0.545	1.588	0.912	0.990951	0.945154	0.506367	0.582182	0.368036	0.998575	0.98475	0.926268	0.940113	0.750048	14.39	9.04	12.45	7.48	17.24	0.616	0.98	1.085	0.864	0.416	0.811	0.545	0.405	0.595	1.113	1.588	1.668	0.912	0.817
FALSE	High	Master Protein	TGGT1_218270-t26_1-p1	transcript=TGGT1_218270-t26_1 | gene=TGGT1_218270 | organism=Toxoplasma_gondii_GT1 | gene_product=hypothetical protein | transcript_product=hypothetical protein | location=TGGT1_chrXII:1575192-1576283(-) | protein_length=363 | sequence_SO=chromosome | SO=protein_coding_gene | is_pseudo=false	0.006	3.243	4	1	2	1	363	39	6.93	0	1	0.847	0.582	0.509	1.206	0.623	0.364347	0.46072	0.422417	0.853114	0.0487916	0.885121	0.887985	0.904295	0.984724	0.219242	4.68	41.33	69.4	19.84	16.45	0.847	0.874	0.761	1.426	0.582	0.455	1.207	0.509	0.347	1.206	0.962	1.367	1.719	0.56
FALSE	High	Master Protein	TGGT1_240380-t26_1-p1	transcript=TGGT1_240380-t26_1 | gene=TGGT1_240380 | organism=Toxoplasma_gondii_GT1 | gene_product=Clu domain-containing protein [Source:UniProtKB/TrEMBL;Acc:S7URC6] | transcript_product=hypothetical protein | location=TGGT1_chrVI:1188384-1214121(+) | protein_length=4955 | sequence_SO=chromosome | SO=protein_coding_gene | is_pseudo=false	0	22.146	2	8	8	8	4955	544.5	6.86	7.43	8	1.031	1.387	1.175	0.714	0.906	0.762652	0.0717377	0.375372	0.112968	0.496414	0.978747	0.380758	0.89526	0.538744	0.847318	21.2	5.79	14	32.64	20.74	1.325	0.883	1.031	0.562	1.387	1.441	1.064	1.414	1.175	0.915	0.714	0.559	0.906	1.054
FALSE	Low	Master Protein	TGGT1_285760-t26_1-p1	transcript=TGGT1_285760-t26_1 | gene=TGGT1_285760 | organism=Toxoplasma_gondii_GT1 | gene_product=Peptidyl-prolyl cis-trans isomerase [Source:UniProtKB/TrEMBL;Acc:A0A125YL72] | transcript_product=U-snRNP-associated cyclophilin family protein | location=TGGT1_chrV:2106868-2108341(-) | protein_length=211 | sequence_SO=chromosome | SO=protein_coding_gene | is_pseudo=false	0.064	1.668	7	1	1	1	211	23	7.43	0	1
FALSE	High	Master Protein	TGGT1_311890-t26_1-p1	transcript=TGGT1_311890-t26_1 | gene=TGGT1_311890 | organism=Toxoplasma_gondii_GT1 | gene_product=hypothetical protein | transcript_product=hypothetical protein | location=TGGT1_chrXI:2321183-2324126(+) | protein_length=394 | sequence_SO=chromosome | SO=protein_coding_gene | is_pseudo=false	0	10.045	11	4	12	4	394	44.1	4.7	2.14	4	0.874	0.976	0.675	1.327	1.124	0.47836	0.458944	0.815064	0.943487	0.772682	0.941301	0.8874	0.973927	0.995217	0.942756	8.64	4.27	36.43	12.77	71.31	0.826	0.983	0.874	1.005	0.499	0.976	0.675	0.49	0.894	1.327	1.213	1.682	1.124	0.583
FALSE	High	Master Protein	TGGT1_240510-t26_1-p1	transcript=TGGT1_240510-t26_1 | gene=TGGT1_240510 | organism=Toxoplasma_gondii_GT1 | gene_product=hypothetical protein | transcript_product=hypothetical protein | location=TGGT1_chrVI:1270405-1274121(-) | protein_length=1238 | sequence_SO=chromosome | SO=protein_coding_gene | is_pseudo=false	0	30.604	12	13	20	13	1238	134.8	8.73	12.32	13	1.134	0.736	0.862	1.435	1.187	0.375727	0.885166	0.794157	0.780073	0.603235	0.890434	0.974587	0.972757	0.971965	0.887232	0.38	16.16	11.51	2.51	15.29	1.137	0.952	1.134	0.597	0.826	0.736	0.862	0.934	0.78	1.435	1.55	1.41	1.187	1.524
FALSE	High	Master Protein	TGGT1_223540-t26_1-p1	transcript=TGGT1_223540-t26_1 | gene=TGGT1_223540 | organism=Toxoplasma_gondii_GT1 | gene_product=Importin N-terminal domain-containing protein [Source:UniProtKB/TrEMBL;Acc:S7UWB9] | transcript_product=importin-beta N-terminal domain-containing protein | location=TGGT1_chrX:3650759-3662029(-) | protein_length=1095 | sequence_SO=chromosome | SO=protein_coding_gene | is_pseudo=false	0	15.556	7	5	5	5	1095	122.1	4.77	7.36	5	1.036	0.924	1.094	1.233	1.386	0.74085	0.561238	0.45813	0.899882	0.196819	0.973495	0.91465	0.913155	0.986691	0.543474	0.68	1.94	4.51	55.95	24.38	1.041	0.958	1.036	1.153	0.912	0.924	1.22	1.094	1.061	0.768	1.233	2.114	1.386	1.071
FALSE	Low	Master Protein	TGGT1_318560-t26_1-p1	transcript=TGGT1_318560-t26_1 | gene=TGGT1_318560 | organism=Toxoplasma_gondii_GT1 | gene_product=Protein-serine/threonine kinase [Source:UniProtKB/TrEMBL;Acc:S7UKA1] | transcript_product=ATPase/histidine kinase/DNA gyrase B/HSP90 domain-containing protein | location=TGGT1_chrIV:1166360-1172757(-) | protein_length=468 | sequence_SO=chromosome | SO=protein_coding_gene | is_pseudo=false	0.069	1.61	2	1	1	1	468	52.7	8.92	0	1	1	1	1.042	100	100	0.908389	0.530466	0.519326	1e-17	1e-17	0.985103	0.91465	0.926406	1.03865e-16	1.03758e-16	7412.26	7412.26	0	0	0	100	0.01		0.01	100			1.042		100				100
FALSE	High	Master Protein	TGGT1_216650-t26_1-p1	transcript=TGGT1_216650-t26_1 | gene=TGGT1_216650 | organism=Toxoplasma_gondii_GT1 | gene_product=S15 sporozoite-expressed protein [Source:UniProtKB/TrEMBL;Acc:S7UKW3] | transcript_product=S15 sporozoite-expressed protein | location=TGGT1_chrXI:5902644-5904672(-) | protein_length=400 | sequence_SO=chromosome | SO=protein_coding_gene | is_pseudo=false	0	7.604	6	2	9	2	400	45.1	7.28	15.19	2	0.966	0.501	0.39	100	100	0.922618	0.239303	0.179827	1e-17	1e-17	0.985103	0.738772	0.727789	1.03865e-16	1.03758e-16	2.03	2.5	30.86	0	0	0.693	0.979	0.966	0.501	0.152	0.51	0.39	0.149	0.492	100	1.846	100	100	0.282
FALSE	High	Master Protein	TGGT1_300200-t26_1-p1	transcript=TGGT1_300200-t26_1 | gene=TGGT1_300200 | organism=Toxoplasma_gondii_GT1 | gene_product=Histone H2A [Source:UniProtKB/TrEMBL;Acc:A0A125YP80] | transcript_product=histone H2AZ | location=TGGT1_chrXII:122117-123855(-) | protein_length=155 | sequence_SO=chromosome | SO=protein_coding_gene | is_pseudo=false	0	6.235	12	2	26	1	155	15.9	10.62	48.42	2	1.007	0.347	0.35	2.436	0.447	0.873276	0.0227768	0.118487	0.0904348	9.55637e-06	0.985103	0.161895	0.596667	0.461163	6.99167e-05	17.12	50.52	9.35	69.94	127.61	1.007	1.124	0.709	0.347	0.099	0.526	0.35	0.111	0.373	1.287	2.436	6.849	0.447	0.24
FALSE	High	Master Protein	TGGT1_271930-t26_1-p1	transcript=TGGT1_271930-t26_1 | gene=TGGT1_271930 | organism=Toxoplasma_gondii_GT1 | gene_product=hypothetical protein | transcript_product=hypothetical protein | location=TGGT1_chrVIII:4274565-4276322(+) | protein_length=234 | sequence_SO=chromosome | SO=protein_coding_gene | is_pseudo=false	0	134.212	84	15	277	15	234	26.1	5.31	566.53	15	1.045	0.973	1.107	0.928	0.984	0.700701	0.717805	0.443189	0.376857	0.637625	0.973495	0.936349	0.907533	0.891088	0.897666	20.64	48.92	19.2	33.47	8.19	1.045	1.19	0.783	0.71	0.973	1.452	0.742	1.107	1.251	1.404	0.928	0.757	1.11	0.984
FALSE	High	Master Protein	TGGT1_213610-t26_1-p1	transcript=TGGT1_213610-t26_1 | gene=TGGT1_213610 | organism=Toxoplasma_gondii_GT1 | gene_product=hypothetical protein | transcript_product=hypothetical protein | location=TGGT1_chrV:1039260-1044139(-) | protein_length=1015 | sequence_SO=chromosome | SO=protein_coding_gene | is_pseudo=false	0.002	3.774	2	1	1	1	1015	111.2	4.81	2.95	1	0.997	0.882	0.513	13.538	100	0.924474	0.731827	0.432204	3.55174e-10	1e-17	0.985103	0.940685	0.906025	3.26799e-09	1.03758e-16	48.96	146.95	29.02	537.52	0	0.01	1.488	0.997	100	0.882	0.431	0.513	1.313	0.429		1.833	100	100	1.617
FALSE	Medium	Master Protein	TGGT1_316730-t26_1-p1	transcript=TGGT1_316730-t26_1 | gene=TGGT1_316730 | organism=Toxoplasma_gondii_GT1 | gene_product=C2 domain-containing protein [Source:UniProtKB/TrEMBL;Acc:S7UM90] | transcript_product=Sma protein | location=TGGT1_chrXI:5469116-5497370(+) | protein_length=2739 | sequence_SO=chromosome | SO=protein_coding_gene | is_pseudo=false	0.041	1.841	1	1	1	1	2739	306	5.76	0	1	100	0.958	100	1.161	0.982	1e-17	0.66907	1e-17	0.774937	0.65468	1.73608e-16	0.931163	1.34062e-16	0.971965	0.898806	0	47.89	0	59.65	146.8	100	100	100	1.415	0.958	0.01	100	100		0.694	100	1.161	0.982	100
FALSE	High	Master Protein	TGGT1_297500-t26_1-p1	transcript=TGGT1_297500-t26_1 | gene=TGGT1_297500 | organism=Toxoplasma_gondii_GT1 | gene_product=T-complex protein 1 subunit eta [Source:UniProtKB/TrEMBL;Acc:S7UKY6] | transcript_product=T-complex protein 1 eta subunit | location=TGGT1_chrII:1806900-1814443(-) | protein_length=546 | sequence_SO=chromosome | SO=protein_coding_gene | is_pseudo=false	0	17.873	12	5	24	5	546	59.4	5.96	21.27	5	1.004	0.442	0.473	1.752	1.044	0.887614	0.11344	0.341493	0.416446	0.994895	0.985103	0.516225	0.884953	0.907108	0.999565	16.77	50.32	1.6	16.29	112.49	0.714	1.004	1.118	0.67	0.141	0.442	0.478	0.168	0.473	1.559	1.752	5.486	1.044	0.252
FALSE	High	Master Protein	TGGT1_318690-t26_1-p1	transcript=TGGT1_318690-t26_1 | gene=TGGT1_318690 | organism=Toxoplasma_gondii_GT1 | gene_product=RNA recognition motif-containing protein [Source:UniProtKB/TrEMBL;Acc:S7UKD5] | transcript_product=RNA recognition motif-containing protein | location=TGGT1_chrIV:1089256-1092702(+) | protein_length=1148 | sequence_SO=chromosome | SO=protein_coding_gene | is_pseudo=false	0	6.454	3	3	3	3	1148	124.5	9	0	3	2.331	1.174	2.201	1.047	1.377	1.107e-07	0.277515	0.0312733	0.574845	0.399457	1.69472e-06	0.776861	0.229338	0.940113	0.777125	84.21	29.01	59.06	25.91	4.84	2.331	100	1.007	0.944	1.991	1.174	2.201	100	1.324	1.411	0.864	1.047	1.332	1.554
FALSE	High	Master Protein	TGGT1_269250-t26_1-p1	transcript=TGGT1_269250-t26_1 | gene=TGGT1_269250 | organism=Toxoplasma_gondii_GT1 | gene_product=MPN domain-containing protein [Source:UniProtKB/TrEMBL;Acc:A0A125YH11] | transcript_product=Mov34/MPN/PAD-1 family protein | location=TGGT1_chrVIII:5961179-5966031(-) | protein_length=343 | sequence_SO=chromosome | SO=protein_coding_gene | is_pseudo=false	0.001	4.198	7	1	1	1	343	38.4	6.25	0	1
FALSE	High	Master Protein	TGGT1_258050-t26_1-p1	transcript=TGGT1_258050-t26_1 | gene=TGGT1_258050 | organism=Toxoplasma_gondii_GT1 | gene_product=Actin like protein ALP2a [Source:UniProtKB/TrEMBL;Acc:S7WER0] | transcript_product=actin like protein ALP2a | location=TGGT1_chrVIIb:3587554-3590116(+) | protein_length=565 | sequence_SO=chromosome | SO=protein_coding_gene | is_pseudo=false	0.001	4.198	3	1	1	1	565	60.1	5.55	3.34	1	100	2.063	100	0.77	1.588	1e-17	0.00228049	1e-17	0.166646	0.0477121	1.73608e-16	0.0216206	1.34062e-16	0.665184	0.216093	0	0	0	0	0		100			2.063			100			0.77			1.588
FALSE	High	Master Protein	TGGT1_224540-t26_1-p1	transcript=TGGT1_224540-t26_1 | gene=TGGT1_224540 | organism=Toxoplasma_gondii_GT1 | gene_product=hypothetical protein | transcript_product=hypothetical protein | location=TGGT1_chrX:2899044-2902293(-) | protein_length=969 | sequence_SO=chromosome | SO=protein_coding_gene | is_pseudo=false	0	7.826	5	2	3	2	969	99.4	4.96	5.15	2	1.342	1.561	2.095	1.198	1.681	0.0548915	0.0498775	0.0399532	0.839003	0.0588319	0.338139	0.299265	0.27757	0.984724	0.250548	9.48	27.53	79.6	63.29	13.99	1.342	1.428	0.763	1.561	2.809	1.271	2.095	4.01	0.97	1.709	0.599	1.198	2.668	1.681
FALSE	Low	Master Protein	TGGT1_214950-t26_1-p1	transcript=TGGT1_214950-t26_1 | gene=TGGT1_214950 | organism=Toxoplasma_gondii_GT1 | gene_product=hypothetical protein | transcript_product=hypothetical protein | location=TGGT1_chrX:6501033-6502602(+) | protein_length=195 | sequence_SO=chromosome | SO=protein_coding_gene | is_pseudo=false	0.077	1.564	8	1	2	1	195	21.5	3.68	0	1	0.975	0.323	0.315	2.361	0.919	0.967851	0.0102211	0.0764156	0.107445	0.560964	0.991539	0.0851423	0.44754	0.522712	0.86452	83.42	67.19	16.05	50.57	146.9	0.598	2.229	0.975	0.591	0.01	0.323	0.353	0.01	0.315	1.556	2.361	100	0.919	0.01
FALSE	High	Master Protein	TGGT1_258380-t26_1-p1	transcript=TGGT1_258380-t26_1 | gene=TGGT1_258380 | organism=Toxoplasma_gondii_GT1 | gene_product=Elongation factor p (Ef-p) kow family domain-containing protein [Source:UniProtKB/TrEMBL;Acc:S7WET3] | transcript_product=elongation factor p (ef-p) kow family domain-containing protein | location=TGGT1_chrVIIb:3409603-3411989(+) | protein_length=513 | sequence_SO=chromosome | SO=protein_coding_gene …	0.002	3.687	4	2	2	2	513	55.7	9.47	0	2	1.2	1.791	1.043	11.6	100	0.216548	0.0348488	0.518072	4.63161e-09	1e-17	0.732264	0.228246	0.926406	4.17091e-08	1.03758e-16	147.02	59.06	9.16	630.47	0	0.01	100	1.2	100	1.791	1.077	1.043	100	0.979		1.346	100	100	1.393
FALSE	High	Master Protein	TGGT1_221210-t26_1-p1	transcript=TGGT1_221210-t26_1 | gene=TGGT1_221210 | organism=Toxoplasma_gondii_GT1 | gene_product=Peptidyl-prolyl cis-trans isomerase [Source:UniProtKB/TrEMBL;Acc:A0A125YG57] | transcript_product=cyclophilin | location=TGGT1_chrII:118956-120827(+) | protein_length=179 | sequence_SO=chromosome | SO=protein_coding_gene | is_pseudo=false	0	24.167	31	6	32	6	179	19.6	6.54	7.7	6	0.957	0.514	0.428	1.791	1.034	0.877958	0.150507	0.249372	0.383423	0.865102	0.985103	0.600629	0.830689	0.895912	0.969164	29.91	41.37	9.94	28.53	87.58	0.488	1.199	0.957	0.713	0.24	0.514	0.428	0.246	0.459	1.446	1.791	15.459	1.034	0.423
FALSE	Low	Master Protein	TGGT1_306300-t26_1-p1	transcript=TGGT1_306300-t26_1 | gene=TGGT1_306300 | organism=Toxoplasma_gondii_GT1 | gene_product=hypothetical protein | transcript_product=hypothetical protein | location=TGGT1_chrIX:5705474-5714461(+) | protein_length=2995 | sequence_SO=chromosome | SO=protein_coding_gene | is_pseudo=false	0.064	1.662	1	1	1	1	2995	317.4	7.52	0	1	1.365	0.275	0.582	0.835	0.26	0.0431267	0.000589718	0.595545	0.244197	3.55271e-15	0.288196	0.00588347	0.93387	0.803658	3.59896e-14	73.55	100.09	29.33	61.26	19.61	0.688	1.365	2.638	0.847	0.049	0.275	0.582	0.067	0.726	0.591	5.322	0.835	0.501	0.26
FALSE	Medium	Master Protein	TGGT1_235420-t26_1-p1	transcript=TGGT1_235420-t26_1 | gene=TGGT1_235420 | organism=Toxoplasma_gondii_GT1 | gene_product=hypothetical protein | transcript_product=hypothetical protein | location=TGGT1_chrX:4743542-4757528(-) | protein_length=4118 | sequence_SO=chromosome | SO=protein_coding_gene | is_pseudo=false	0.017	2.359	0	1	1	1	4118	423.3	8.06	0	1	0.447	0.735	0.337	0.763	0.332	1.42362e-06	0.906303	0.101614	0.159059	1.44425e-06	2.12157e-05	0.974587	0.539845	0.647326	1.10393e-05	3.39	33.73	31.05	82.75	80.46	0.447	0.383	0.458	0.952	0.192	0.735	0.426	0.074	0.337	0.763	1.726	0.258	0.726	0.332
FALSE	High	Master Protein	TGGT1_289100-t26_1-p1	transcript=TGGT1_289100-t26_1 | gene=TGGT1_289100 | organism=Toxoplasma_gondii_GT1 | gene_product=hypothetical protein | transcript_product=hypothetical protein | location=TGGT1_chrIX:2793313-2802752(+) | protein_length=698 | sequence_SO=chromosome | SO=protein_coding_gene | is_pseudo=false	0	181.968	61	43	210	43	698	78.7	5.21	345.67	43	0.83	52.599	34.25	0.017	0.959	0.304429	1e-17	1.39888e-14	1e-17	0.536352	0.841727	1.60374e-16	1.84652e-13	1.03865e-16	0.86452	4.45	29.08	49.56	31.34	10.06	0.83	0.966	0.806	62.916	9.787	52.599	45.7	13.649	34.25	0.014	0.033	0.017	0.959	0.43
FALSE	High	Master Protein	TGGT1_315320-t26_1-p1	transcript=TGGT1_315320-t26_1 | gene=TGGT1_315320 | organism=Toxoplasma_gondii_GT1 | gene_product=SAG-related sequence SRS52A [Source:UniProtKB/TrEMBL;Acc:S7UMK1] | transcript_product=SAG-related sequence SRS52A | location=TGGT1_chrXI:4594837-4596241(+) | protein_length=329 | sequence_SO=chromosome | SO=protein_coding_gene | is_pseudo=false	0	21.759	30	7	18	7	329	34.2	5.52	8.11	7	0.662	0.684	0.356	1.905	0.737	0.0156726	0.589791	0.127562	0.299817	0.0409892	0.13543	0.91465	0.612948	0.850784	0.192784	20.8	28.27	49.9	62.97	141.74	0.581	1.028	0.662	0.684	0.107	0.845	0.356	0.107	0.537	1.096	1.905	15.466	0.737	0.205
FALSE	High	Master Protein	TGGT1_314370-t26_1-p1	transcript=TGGT1_314370-t26_1 | gene=TGGT1_314370 | organism=Toxoplasma_gondii_GT1 | gene_product=hypothetical protein | transcript_product=hypothetical protein | location=TGGT1_chrXI:4009722-4013794(-) | protein_length=844 | sequence_SO=chromosome | SO=protein_coding_gene | is_pseudo=false	0.008	3.064	3	1	2	1	844	87.8	9.13	0	1	1.193	0.415	0.551	0.912	0.173	0.231183	0.0759165	0.520099	0.351322	1e-17	0.756101	0.395966	0.926406	0.87144	1.03758e-16	16.87	49.32	38.07	134.88	144.16	1.193	0.356	1.329	0.621	0.011	0.415	0.741	0.01	0.551	10.098	0.912	0.418	6.274	0.01
FALSE	High	Master Protein	TGGT1_304740-t26_1-p1	transcript=TGGT1_304740-t26_1 | gene=TGGT1_304740 | organism=Toxoplasma_gondii_GT1 | gene_product=Protein kinase domain-containing protein [Source:UniProtKB/TrEMBL;Acc:S7UUU5] | transcript_product=rhoptry kinase family protein ROP35 | location=TGGT1_chrVIIa:653060-656106(-) | protein_length=640 | sequence_SO=chromosome | SO=protein_coding_gene | is_pseudo=false	0	10.42	9	5	10	5	640	71.2	7.78	4.38	5	1.254	0.954	1.215	1.215	1.365	0.132204	0.476101	0.339945	0.868536	0.204909	0.584333	0.903749	0.883857	0.986633	0.558279	5.18	11.04	29.72	29.23	8.54	1.363	1.21	1.254	1.03	0.954	0.725	1.215	1.468	0.972	1.215	0.975	1.629	0.917	1.365
FALSE	High	Master Protein	TGGT1_252500-t26_1-p1	transcript=TGGT1_252500-t26_1 | gene=TGGT1_252500 | organism=Toxoplasma_gondii_GT1 | gene_product=Protein kinase domain-containing protein [Source:UniProtKB/TrEMBL;Acc:S7VW49] | transcript_product=polo kinase | location=TGGT1_chrIII:579006-581099(-) | protein_length=697 | sequence_SO=chromosome | SO=protein_coding_gene | is_pseudo=false	0	25.905	16	9	15	9	697	76.9	10.58	8	9	0.786	1.193	1.18	0.971	1.032	0.173802	0.16919	0.37075	0.445008	0.879881	0.654773	0.629251	0.89526	0.915333	0.971843	74.23	46.77	54.8	10.72	37.3	1.874	0.786	0.524	0.817	1.618	1.193	2.013	1.18	0.744	1.062	0.971	0.905	0.773	1.595
[truncated: 1,125 more rows]
[truncated: 59 more columns]
